# Supplementary material for: Accurate identification of circRNA landscape and complexity reveals their pivotal roles in human oligodendroglia differentiation
Source: PubMed Central journal article supplement (PMC8819885; doi:10.1186/s13059-022-02621-1), 2022-02-07
Supplement: 13059_2022_2621_MOESM1_ESM.pdf [file 13059_2022_2621_MOESM1_ESM.pdf]

## **Additional file 1**

### **Accurate identification of circRNA landscape and complexity reveals their pivotal roles in human oligodendroglia differentiation**

Yangping Li<sup>1†</sup>, Feng Wang<sup>1†</sup>, Peng Teng<sup>2†</sup>, Li Ku<sup>2</sup>, Li Chen<sup>3</sup>, Yue Feng<sup>2\*</sup> and Bing Yao<sup>1\*</sup>

Correspondence: [yfeng@emory.edu](mailto:yfeng@emory.edu); [bing.yao@emory.edu](mailto:bing.yao@emory.edu)

<sup>†</sup>Yangping Li, Feng Wang and Peng Teng contributed equally to this work.

<sup>1</sup>Department of Human Genetics, Emory University School of Medicine, Atlanta, GA 30322, USA

<sup>2</sup>Department of Pharmacology and Chemical Biology, Emory University School of Medicine, Atlanta, GA 30322, USA

<sup>3</sup>Department of Biostatistics and Health Data Science, Center for Computational Biology and Bioinformatics, Indiana University School of Medicine, Indianapolis, IN 46202, USA

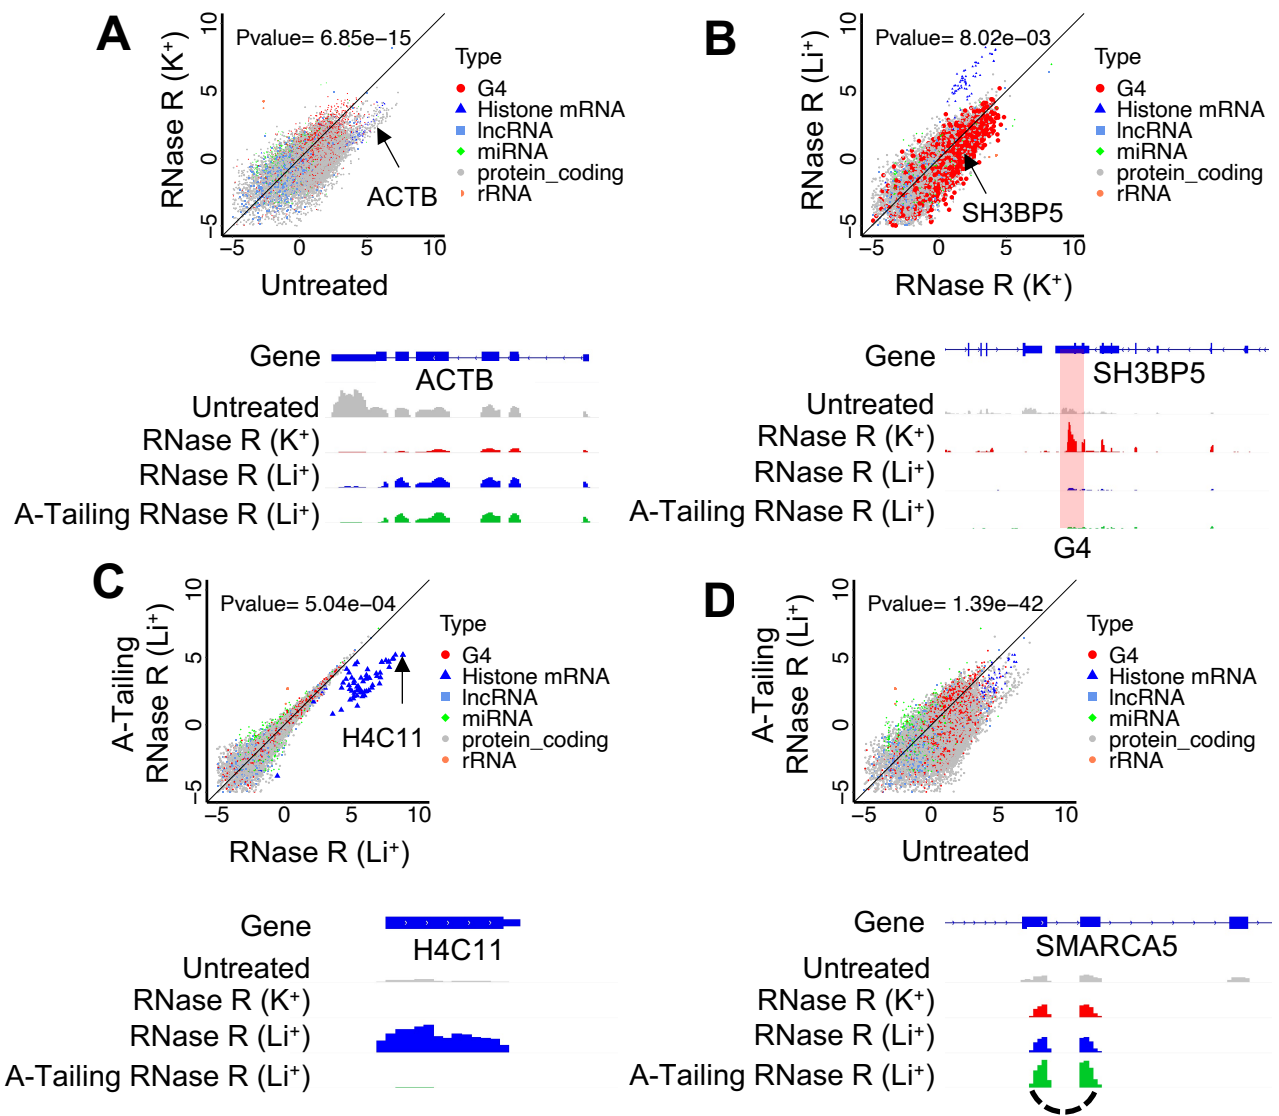

**Figure S1** A-tailing RNase R treatment in Li<sup>+</sup> could effectively degrade linear RNAs with circRNAs unaffected in SH-SY5Y cell. **A** Substantial linear mRNAs were degraded by RNase R treatment with K<sup>+</sup> buffer in SH-SY5Y cell. **B** mRNAs with G-quadruplex (G4) structures were effectively degraded by RNase R treatment in Li<sup>+</sup> buffer in SH-SY5Y cell. **C** Linear RNAs with short poly-A tail were resistant to RNase R treatment but could be degraded after adding the Poly-A tail in SHSY-5Y cells. **D** A-tailing approach achieved the best linear RNA removal (scatter plot) without affecting circRNA stability (IGV view) in SH-SY5Y cells.

**A**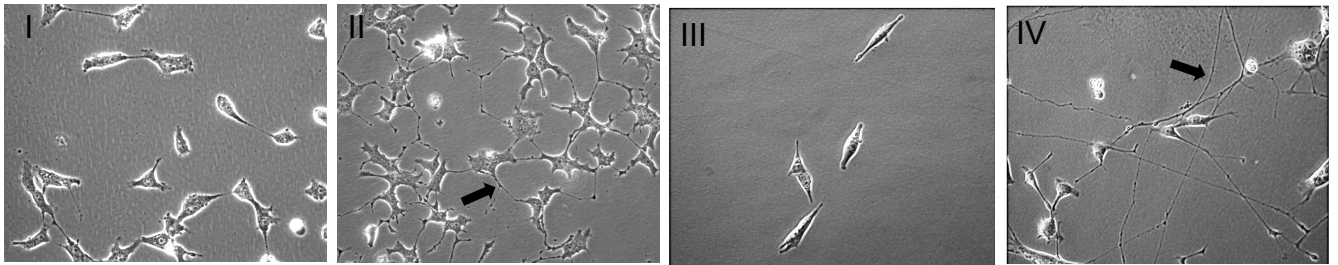**B** Cell types isolated from human brain (Zhang et al., 2016)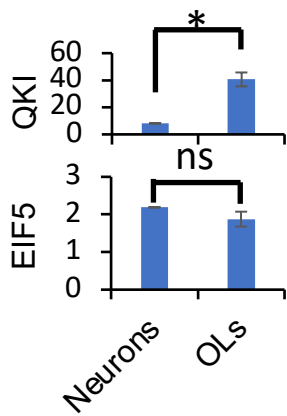**C**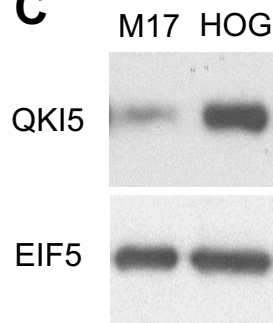**D**

Human fetal brain single cell RNA-seq (Zhong et al., 2018)

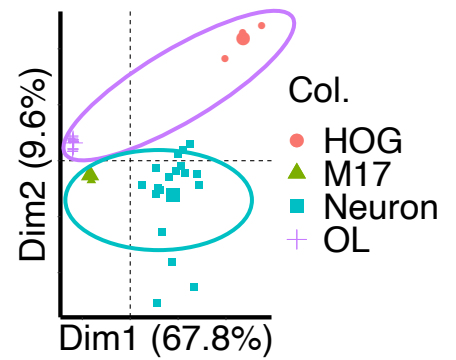**E** Human iPSC-derived Neuron/ OPC RNA-seq (Hoffman et al., 2017)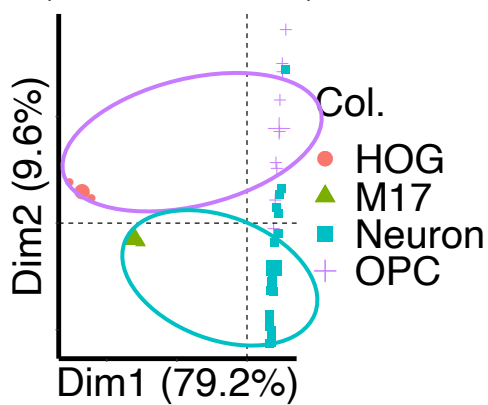

**Figure S2** M17 and HOG recapitulate neurons and OLs characteristics. **A** Cell morphology changes upon HOG/M17 differentiation. Prolonged dendrites in differentiated HOG cells and axons in differentiated M17 cells were observed in A(II) and A(IV). **B** Differential expression of *QKI* and *EIF5* were found in human neurons and oligodendroglia *in vivo* (GSE73721). **C** The Western blot of QKI5 and EIF5 in M17 and HOG cells showed similar expression patterns compared to Fig. S2A. **D** Gene expression PCA analysis suggested M17 or HOG cells were closely related to neurons or OLs derived from the human fetal prefrontal cortex, respectively. Neuron and OLs single-cell RNA-seq data were obtained from GSE104276. **E** Gene expression PCA analysis suggested M17 or HOG cells were closely related to iPSC-derived neurons or Oligodendrocyte Progenitor Cells (OPCs), respectively. Neuron and OPCs RNA-seq data were obtained from GSE106589 and GSE130063. \*  $P < 0.05$ .

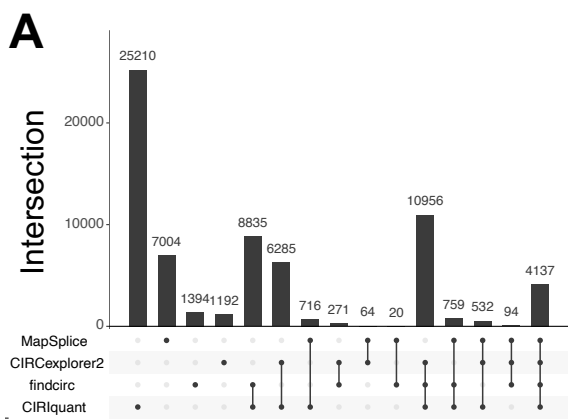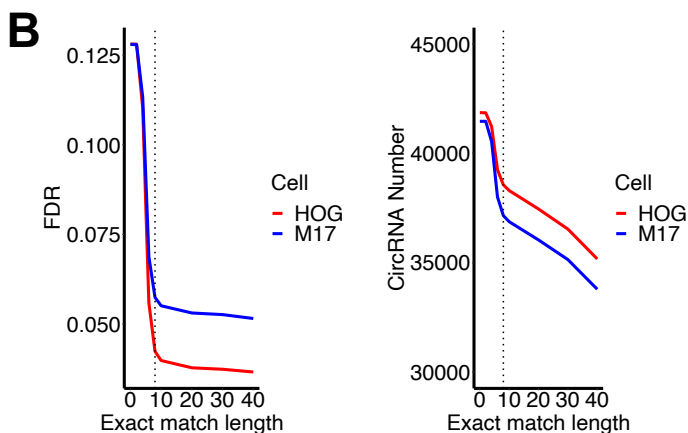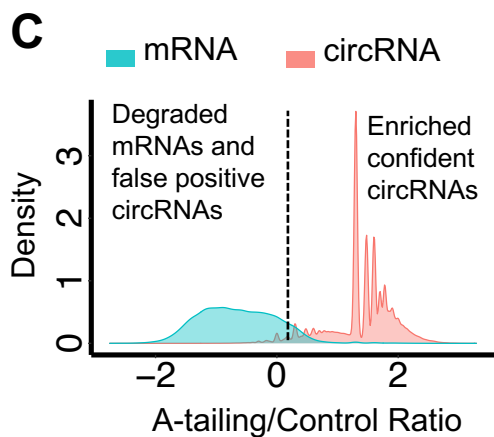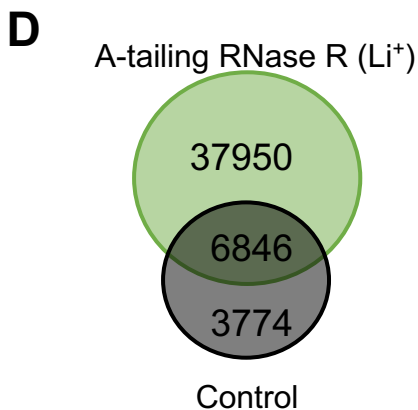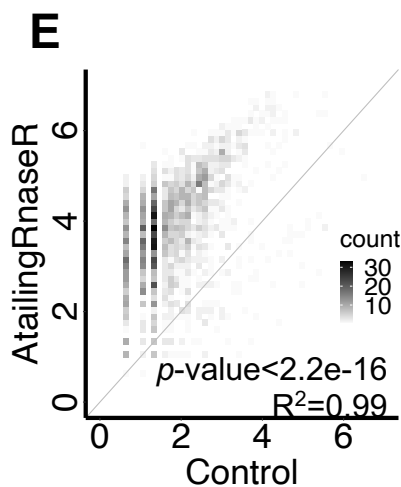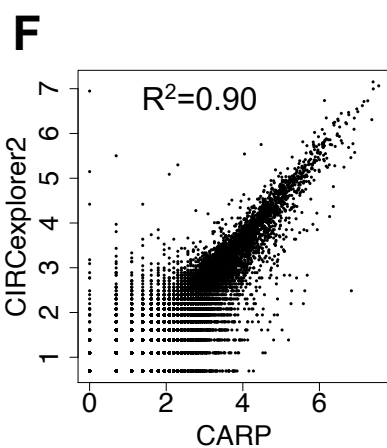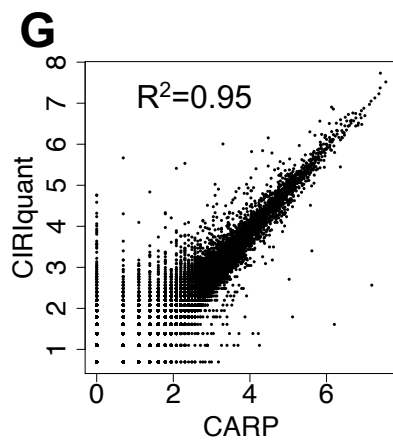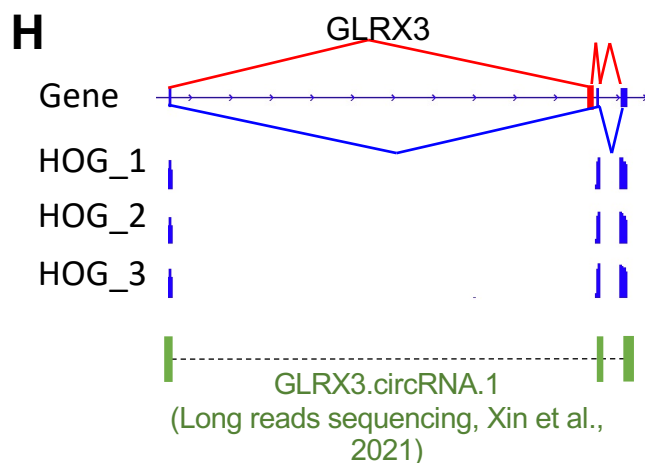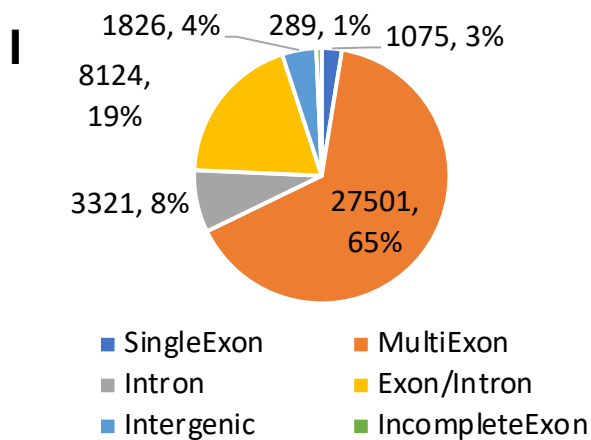

**Figure S3** CARP identified and quantified confident full-length circRNAs. **A** Comparison of circRNAs identified by MapSplice, CIRCexplorer2, find\_circ, and CIRIquant using A-tailing data from parental HOG cells. The Student's *t*-test (two-tailed and unpaired) was used for gene expression comparison. **B** A-tailing reads mapping to the pseudo-reference were optimized to eliminate false positives. The association between FDR (y-axis) and the number of base pairs in each read fully matching the BSJ flanking sequence (x-axis) were indicated. Our data shows 8 bp entirely complementary to the BSJ flanking regions in pseudo reference achieved FDR < 0.05 (left, dashed line). The number of circRNAs identified with various stringencies was also indicated (right). **C** Identify confident circRNAs by removing false-positive circRNAs sensitive to A-tailing and RNase R treatment in M17 cells. The ratio of RNA levels between A-tailing treatment and control was calculated and shown on the x-axis. The dashed line with an FDR < 0.05 shows the cutoff defining resistant vs. sensitive A-tailing treatments. **D** Comparison of circRNAs identified by CARP using A-tailing and untreated libraries from HOG cells. **E** Scatter plot showed circRNAs expression quantification was highly correlated in A-tailing and untreated libraries. *P*-value and  $R^2$  for Pearson correlation are shown. **F** Scatter plot showed a high correlation of circRNA quantification between CARP and CIRCexplorer2.  $R^2$  for Pearson correlation was indicated. **G** Scatter plot showed a high correlation of circRNA quantification between CARP and CIRIquant.  $R^2$  for Pearson correlation was indicated. **H** Internal structure of circGLRX3 was different from its host gene. An exon (highlighted in red) was skipped in the circRNA full-length sequence. IGV view confirmed that mapped reads also support an exon skipping event in circGLRX3. The entire length of circGLRX3 was further confirmed by a recent publication using long reads sequencing (highlighted in green). **I** Classification of confident circRNA identified by CARP in HOG. The number and percentage of each class of circRNA were labeled. Corresponding circRNA are listed in Additional file 3.

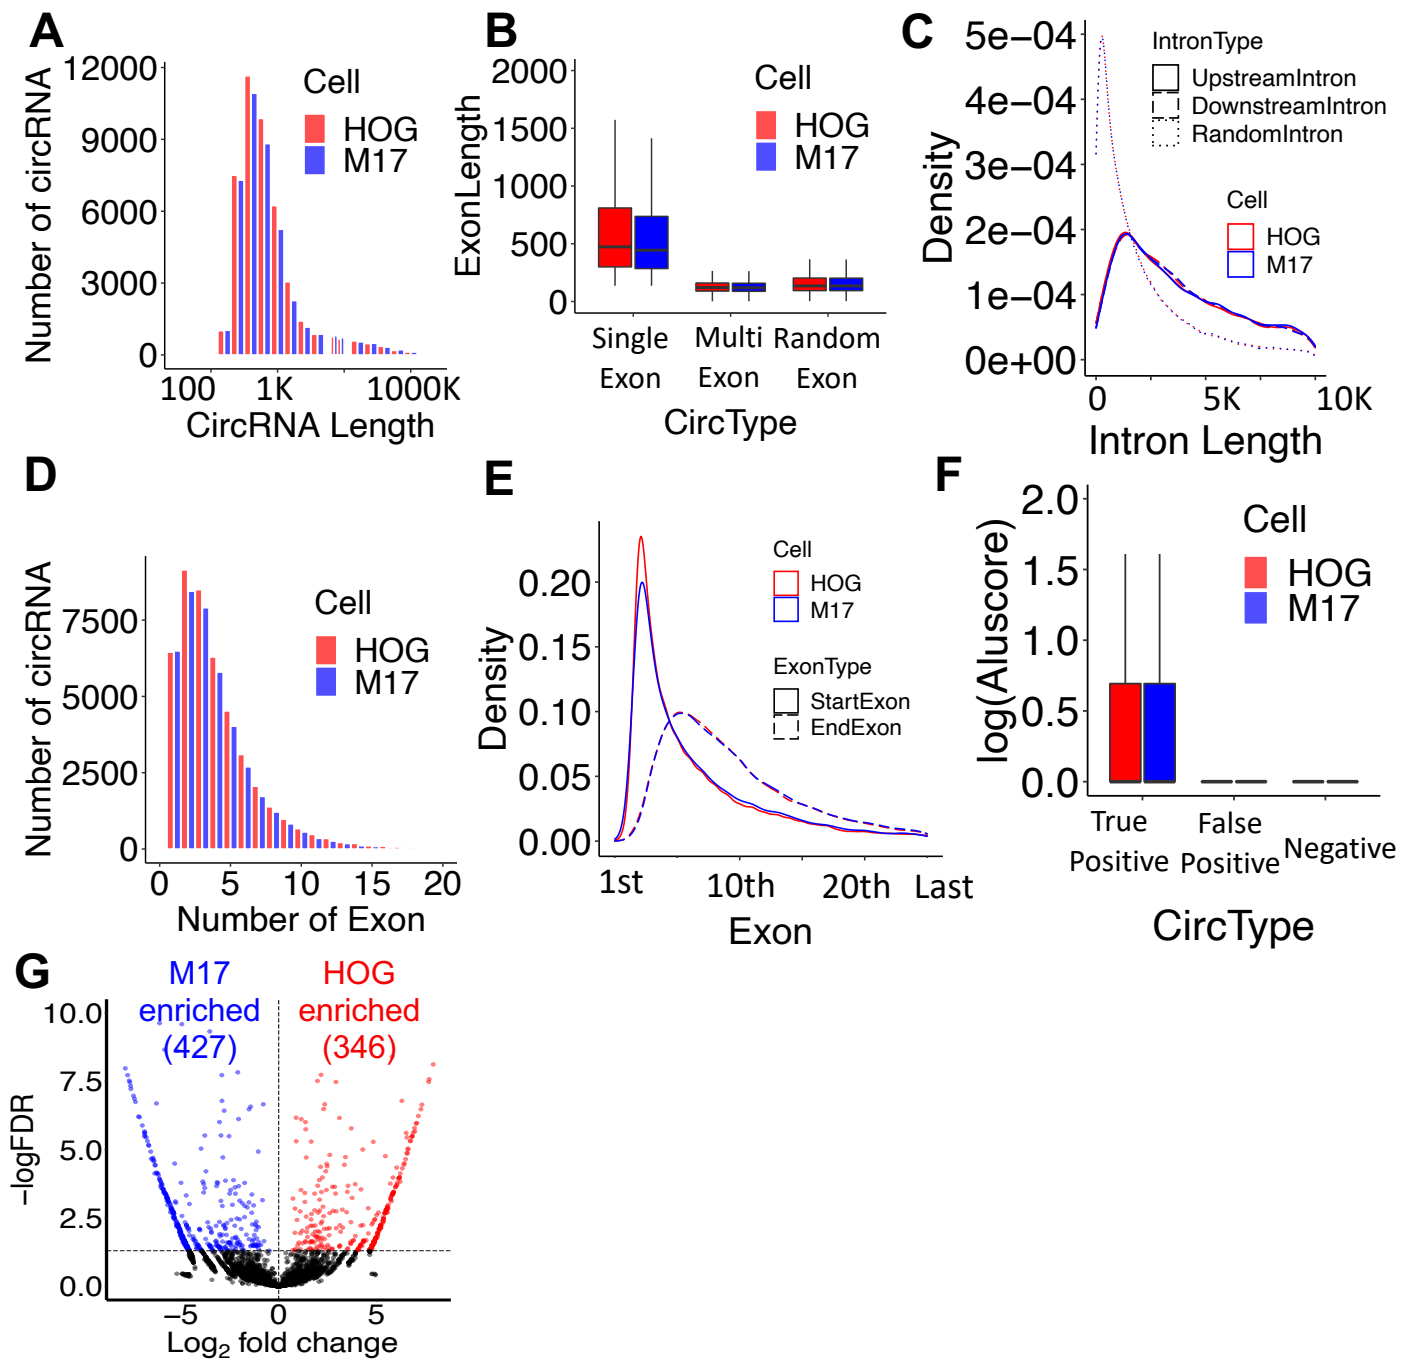

**Figure S4** CircRNA showed similar general features but had a distinctive circRNA expression landscape in M17 and HOG cells. **A** Distribution of circRNA length in M17 and HOG cells. **B** Exon length from multi-exon circRNA, single exon circRNA, and random non-circRNA forming exon in M17 and HOG cells. **C** CircRNA flanking intron length distribution in M17 and HOG cells. **D** Distribution of circRNA exon number in M17 and HOG cells. **E** Distribution of start and end exons of multi-exon circRNA in M17 and HOG cells. **F** *Alu* score in the flanking intron of circRNAs in M17 and HOG cells. **G** Volcano plot shows DE circRNAs in M17 and HOG identified by untreated RNA-seq library.

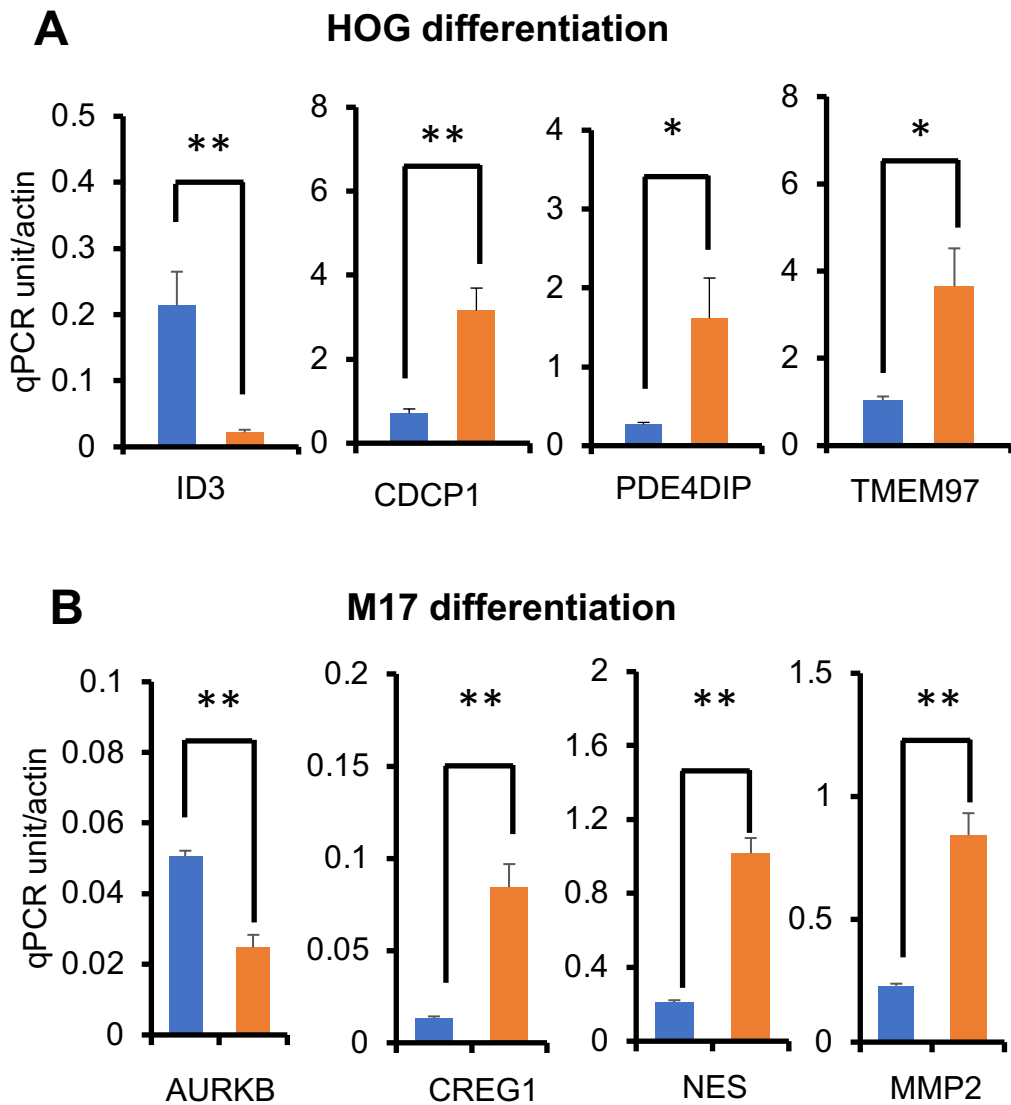

**Figure S5** Marker gene expression change suggested M17 and HOG cells could recapitulate neuron and OL differentiation. Expression changes in *ID3*, *CDCP1*, *PDE4DIP*, and *TMEM97* during HOG differentiation were tested by qPCR. **B** Expression changes of *AURKB*, *CREG1*, *NES*, and *MMP2* during M17 differentiation were also tested by qPCR. The Student's *t*-test (two-tailed and unpaired) was used for gene expression comparison (\*  $P < 0.05$ . \*\*  $P < 0.01$ ).



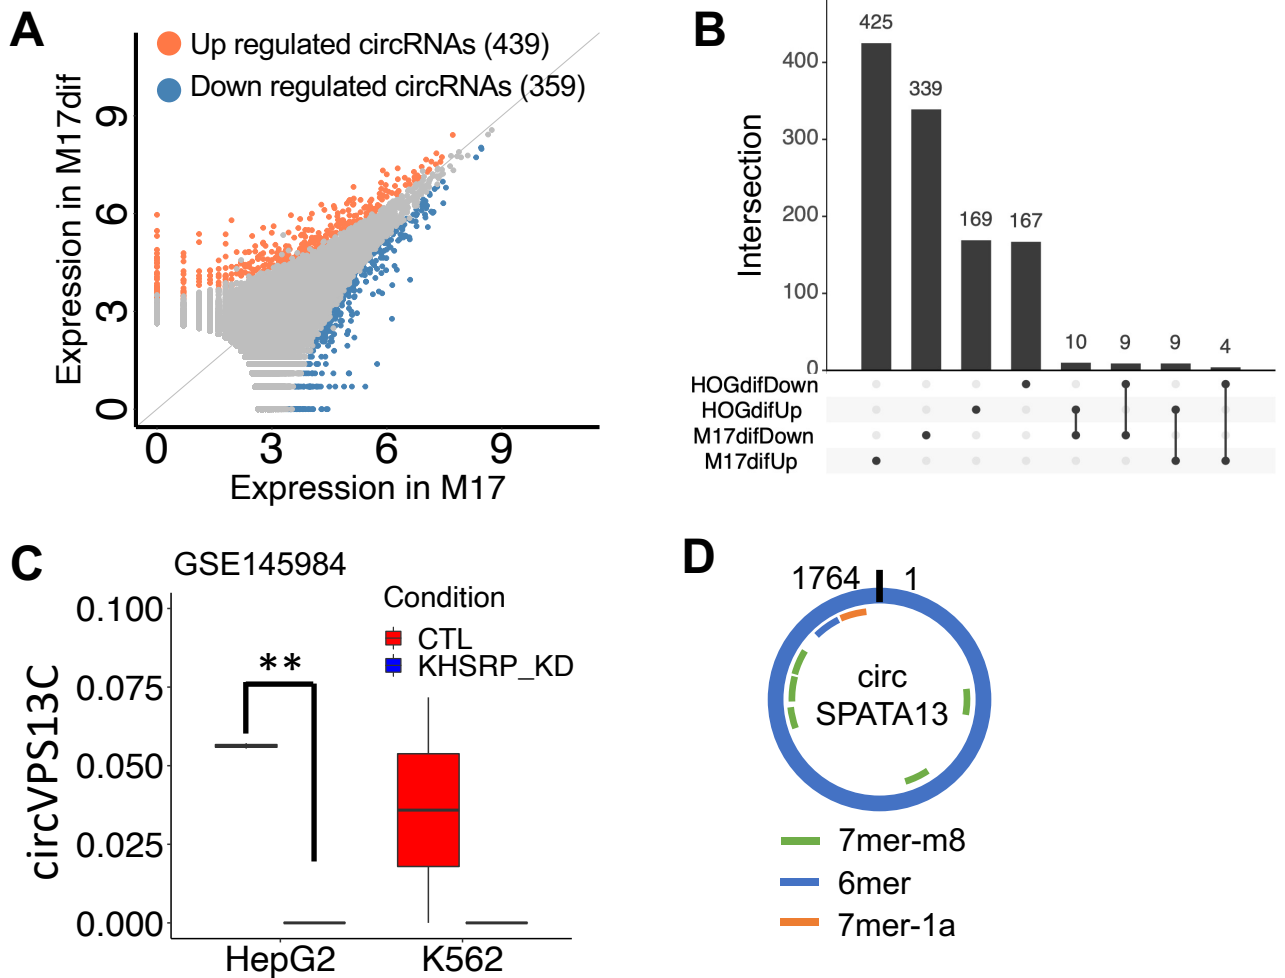

**Figure S6** CircRNA expression regulation and their function during HOG differentiation. **A** Scatter plot showed DE circRNAs upon M17 differentiation by A-tailing data (DESeq2, FDR < 0.05). **B** Comparison of up- and downregulated circRNAs during M17 differentiation and HOG differentiation. **C** CircVPS13C was downregulated upon KHSRP knockdown in HepG2 and K562 cells according to published RNA-seq data (GSE145984). **D** CircSPATA13 was predicted to contain 7 conserved miR-760 binding sites. A Chi-squared test was used to compare the overlap in circRNA numbers in differentiated M17 and HOG cells.

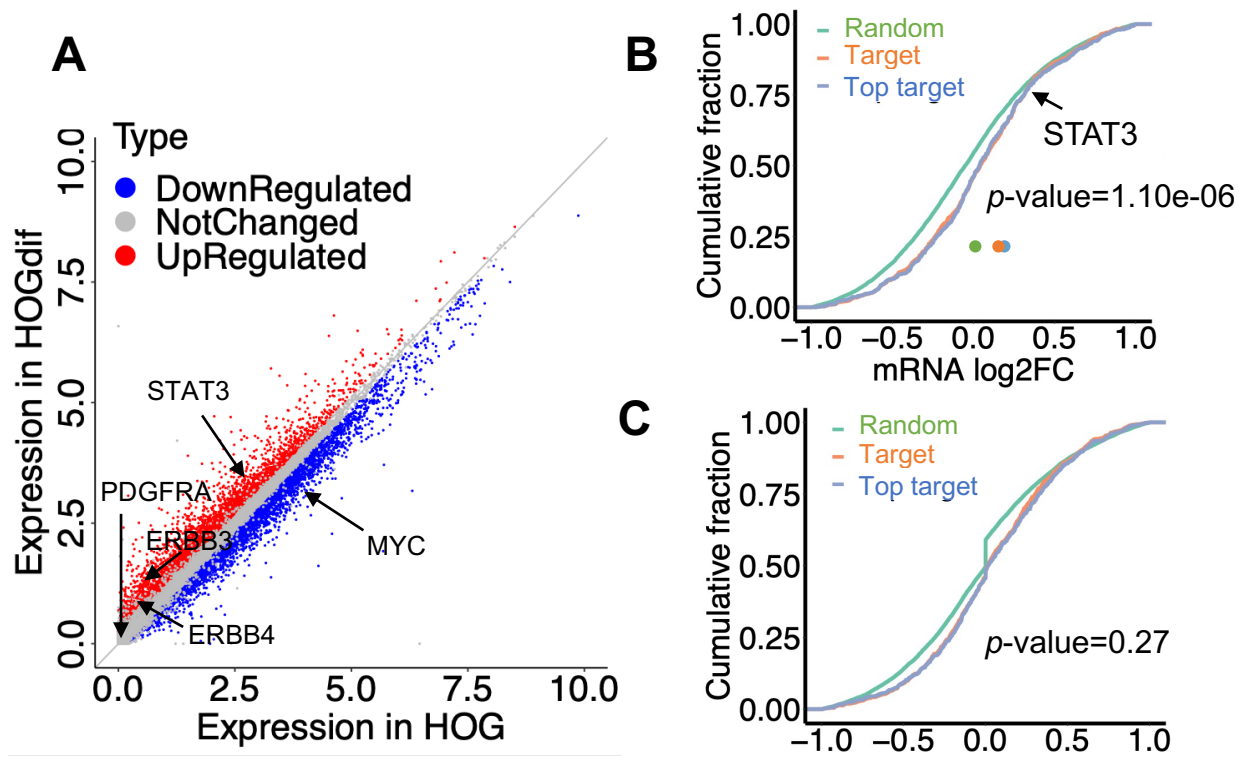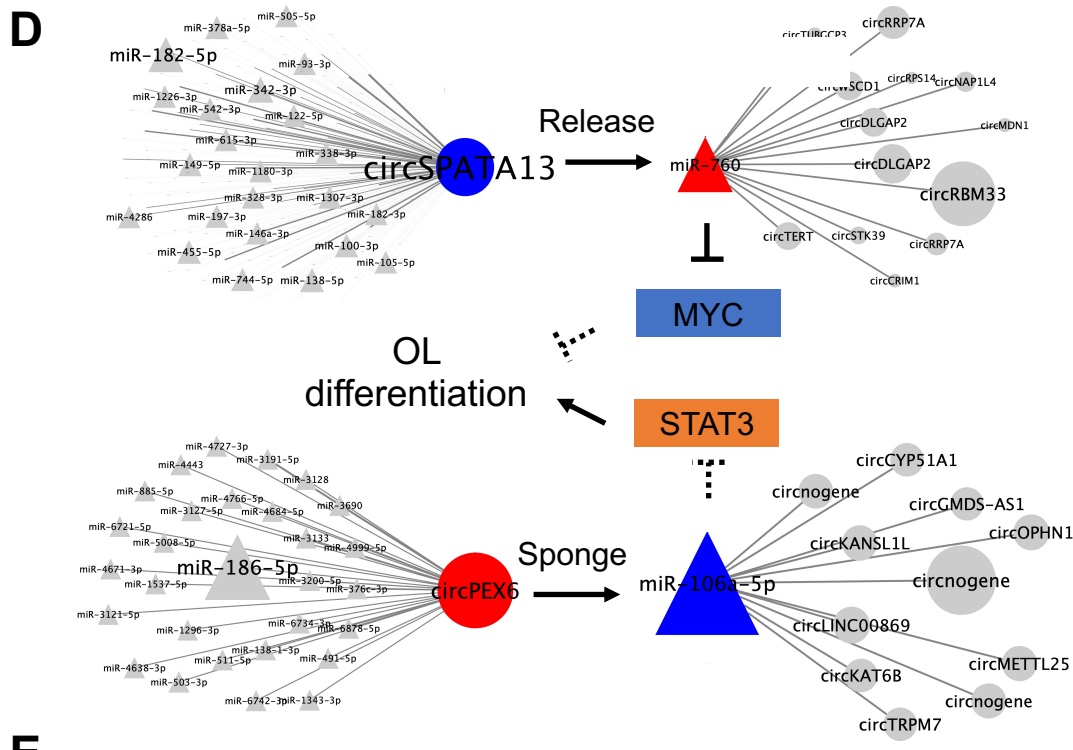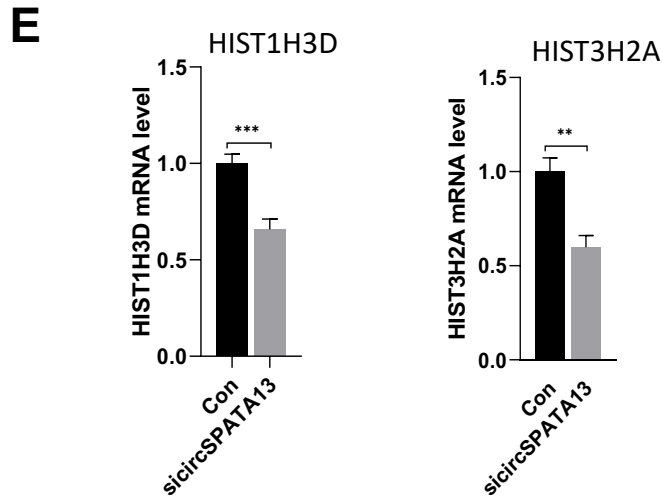

**Figure S7** CircRNA functions in regulating mRNA expression via the circRNA-miRNA-mRNA network. **A** Scatter plot showed gene expression changes upon HOG differentiation. Significant up- and downregulated genes are red and blue, respectively (Cuffdiff, FDR < 0.05). **B** Cumulative plot show target genes of miR17-5p/106-5p cluster were significantly upregulated in HOG differentiation compared with randomly selected non-miRNA target genes. *P*-value by Student's *t*-test (two-tailed and unpaired) was indicated. **C** Cumulative plot showed pre-mRNA of miR17-5p/106-5p cluster targets were not affected in HOG differentiation. *P*-value by Student's *t*-test (two-tailed and unpaired) was indicated. **D** CircRNA-miRNA-mRNA network could regulate HOG differentiation by circSPATA13/miR-760/MYC and circPEX6/miR106a-5p/STAT3 pathway. Additional miRNAs that could potentially be regulated by circSPATA13/circPEX6 and additional circRNAs that could potentially regulate miR-760 and miR-106a-5p are shown in grey. **E** Expression change of miR-760 target *HIST1H3D*, *HIST3H2A* upon si-circSPATA13 in HOG cell. *T*-test (two-tailed and unpaired) were used for gene expression comparison. n=7, \*\*\* *P* < 0.001, \*\* *P* < 0.01.

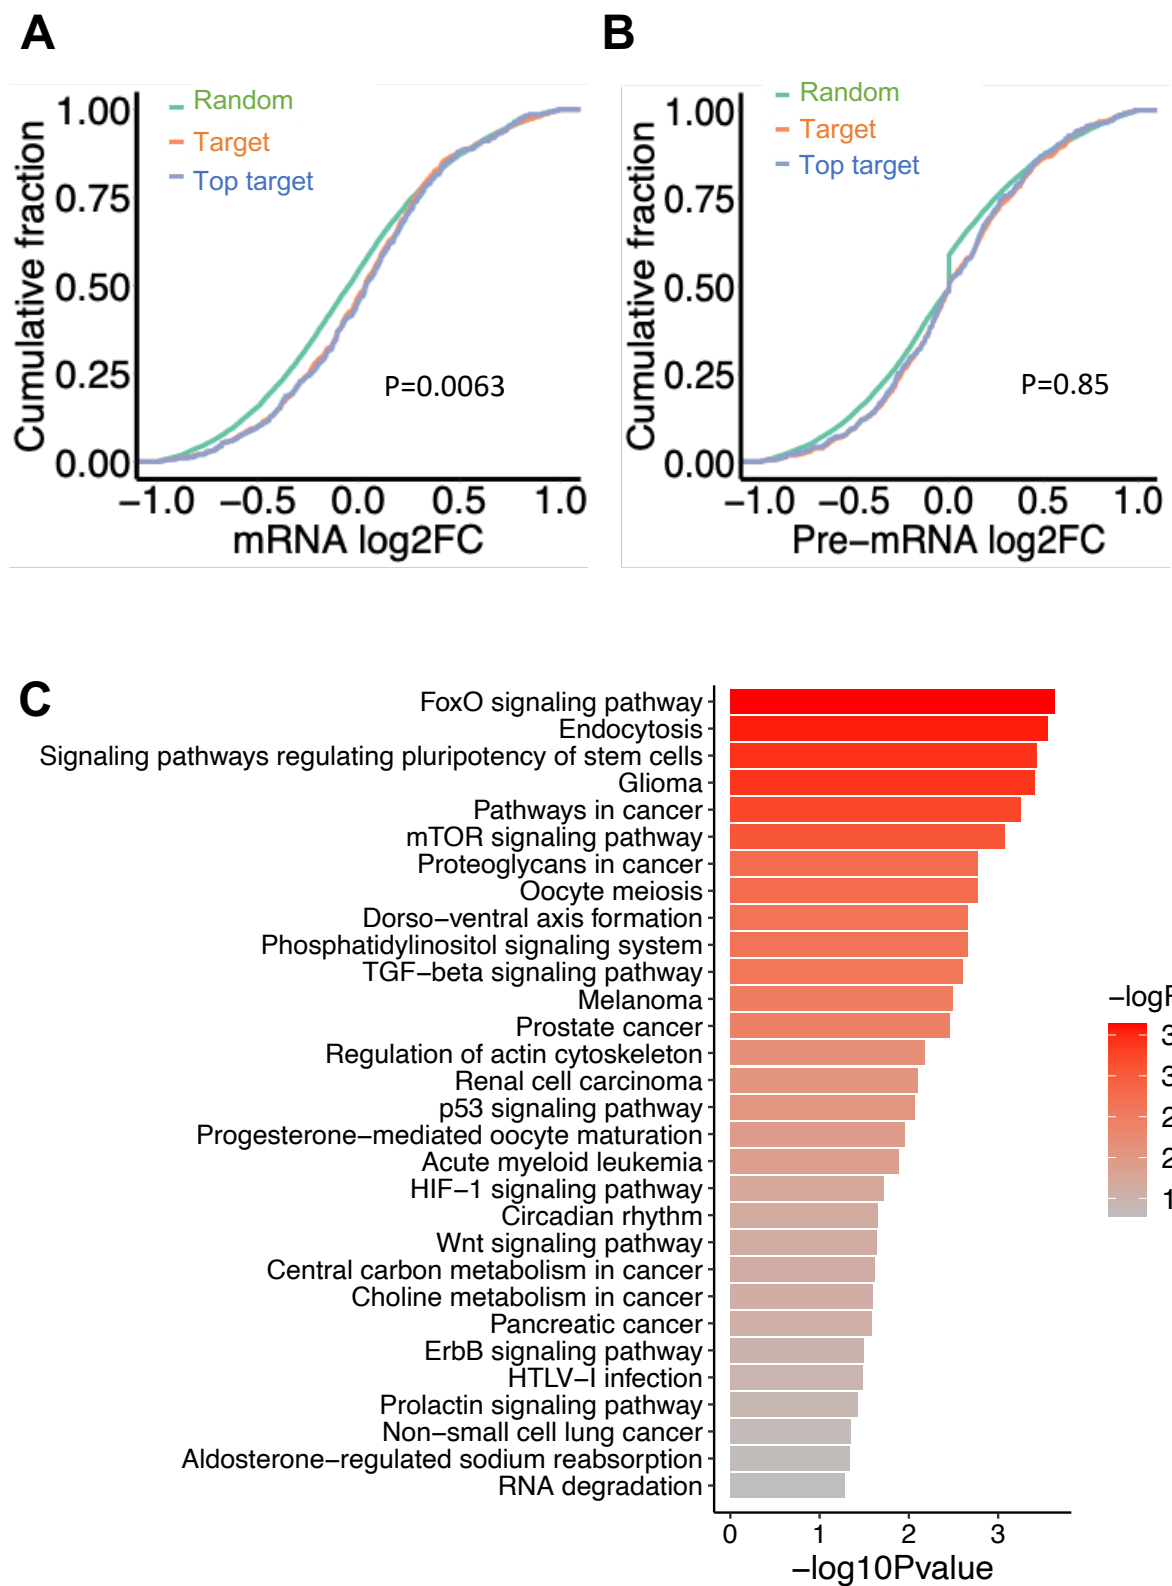

**Figure S8** Function of circRNA cluster ARHGEF28 in regulating HOG differentiation. **A** Cumulative plot shows miR-454-3p target genes were significantly upregulated in HOG differentiation. **B** Cumulative plot shows pre-mRNA of miR-454-3p targets were not affected in HOG differentiation. **C** Bar plot shows KEGG analysis for top targets of miR-454-3p (Fisher's exact test,  $P < 0.05$ ).
