# Supplementary material for: Accurate identification of circRNA landscape and complexity reveals their pivotal roles in human oligodendroglia differentiation
Source: PubMed Central journal article supplement (PMC8819885; doi:10.1186/s13059-022-02621-1), 2022-02-07
Supplement: 13059_2022_2621_MOESM3_ESM.pdf [file 13059_2022_2621_MOESM3_ESM.pdf]

### SingleExon (1075)

|       |           |           |
|-------|-----------|-----------|
| chr10 | 100238021 | 100238231 |
| chr10 | 101803734 | 101804019 |
| chr10 | 102139099 | 102142004 |
| chr10 | 102360183 | 102360395 |
| chr10 | 11851996  | 11852215  |
| chr10 | 11956319  | 11956523  |
| chr10 | 124045666 | 124046724 |
| chr10 | 124681606 | 124682379 |
| chr10 | 124706635 | 124706887 |
| chr10 | 125038996 | 125039155 |
| chr10 | 133467197 | 133467353 |
| chr10 | 14896845  | 14897517  |
| chr10 | 15283877  | 15284105  |
| chr10 | 27169943  | 27171083  |
| chr10 | 27208245  | 27208445  |
| chr10 | 28595732  | 28596041  |
| chr10 | 30450257  | 30450519  |
| chr10 | 31461036  | 31461237  |
| chr10 | 31861394  | 31861658  |
| chr10 | 32017142  | 32017359  |
| chr10 | 32284697  | 32285050  |
| chr10 | 45625950  | 45627105  |
| chr10 | 46010222  | 46011206  |
| chr10 | 50343491  | 50344345  |
| chr10 | 5906036   | 5906632   |
| chr10 | 68121437  | 68122340  |
| chr10 | 68174065  | 68174656  |
| chr10 | 68422696  | 68422890  |
| chr10 | 68747373  | 68747566  |
| chr10 | 68959805  | 68960249  |
| chr10 | 72196810  | 72196989  |
| chr10 | 73053350  | 73053590  |
| chr10 | 74842599  | 74843478  |
| chr10 | 75150513  | 75151106  |
| chr10 | 79310923  | 79311184  |
| chr10 | 829384    | 829594    |
| chr10 | 86517570  | 86518091  |
| chr10 | 86875866  | 86876085  |
| chr10 | 87151349  | 87152879  |
| chr10 | 89611695  | 89612048  |
| chr10 | 90748833  | 90749594  |
| chr10 | 92537365  | 92537550  |
| chr10 | 94030682  | 94032252  |
| chr10 | 94245945  | 94246621  |

|       |           |           |
|-------|-----------|-----------|
| chr10 | 96949007  | 96949295  |
| chr10 | 97567913  | 97568141  |
| chr11 | 102114143 | 102114394 |
| chr11 | 102335965 | 102336220 |
| chr11 | 102368305 | 102368548 |
| chr11 | 108172198 | 108173851 |
| chr11 | 108267170 | 108267342 |
| chr11 | 110136662 | 110137414 |
| chr11 | 118786051 | 118786518 |
| chr11 | 119126934 | 119127125 |
| chr11 | 119232447 | 119232695 |
| chr11 | 12162078  | 12162419  |
| chr11 | 122903924 | 122904444 |
| chr11 | 123059058 | 123059261 |
| chr11 | 12764178  | 12764434  |
| chr11 | 128480190 | 128480451 |
| chr11 | 130260855 | 130261929 |
| chr11 | 17356650  | 17357001  |
| chr11 | 18291441  | 18292019  |
| chr11 | 19933175  | 19934277  |
| chr11 | 28058925  | 28059161  |
| chr11 | 33286412  | 33287511  |
| chr11 | 35725923  | 35726163  |
| chr11 | 36227084  | 36227430  |
| chr11 | 3702462   | 3702892   |
| chr11 | 3731390   | 3731578   |
| chr11 | 3768580   | 3768744   |
| chr11 | 4074501   | 4074679   |
| chr11 | 45979759  | 45979966  |
| chr11 | 46816197  | 46816404  |
| chr11 | 62589030  | 62589221  |
| chr11 | 63749990  | 63750198  |
| chr11 | 64859923  | 64860336  |
| chr11 | 65079352  | 65079787  |
| chr11 | 66639699  | 66640123  |
| chr11 | 66643449  | 66644140  |
| chr11 | 66668614  | 66669291  |
| chr11 | 67231565  | 67231960  |
| chr11 | 68175017  | 68175183  |
| chr11 | 68189916  | 68190152  |
| chr11 | 68347846  | 68348243  |
| chr11 | 68537658  | 68537891  |
| chr11 | 70272172  | 70272436  |
| chr11 | 71147119  | 71147338  |
| chr11 | 73844806  | 73844976  |

|       |           |           |
|-------|-----------|-----------|
| chr11 | 74078114  | 74078717  |
| chr11 | 75404671  | 75404868  |
| chr11 | 77672041  | 77672230  |
| chr11 | 86306244  | 86306482  |
| chr11 | 94799389  | 94800311  |
| chr12 | 1027747   | 1028572   |
| chr12 | 104927972 | 104928694 |
| chr12 | 10709907  | 10710114  |
| chr12 | 108701123 | 108701323 |
| chr12 | 108792285 | 108792829 |
| chr12 | 110342227 | 110342448 |
| chr12 | 110377392 | 110377617 |
| chr12 | 110551788 | 110551968 |
| chr12 | 111418118 | 111418877 |
| chr12 | 111883580 | 111883768 |
| chr12 | 116237467 | 116237705 |
| chr12 | 116985205 | 116985402 |
| chr12 | 118095532 | 118095814 |
| chr12 | 11869423  | 11869969  |
| chr12 | 120224150 | 120224377 |
| chr12 | 120546404 | 120546601 |
| chr12 | 121509566 | 121510039 |
| chr12 | 121819403 | 121819895 |
| chr12 | 12203202  | 12203400  |
| chr12 | 122340752 | 122341697 |
| chr12 | 122377388 | 122377960 |
| chr12 | 12244261  | 12244655  |
| chr12 | 124372021 | 124372610 |
| chr12 | 12635776  | 12635974  |
| chr12 | 128814774 | 128815070 |
| chr12 | 1289851   | 1290012   |
| chr12 | 12908242  | 12909171  |
| chr12 | 132729678 | 132730270 |
| chr12 | 132754674 | 132755133 |
| chr12 | 1754257   | 1754514   |
| chr12 | 19283279  | 19283745  |
| chr12 | 19493799  | 19493986  |
| chr12 | 2873976   | 2874525   |
| chr12 | 2994737   | 2994992   |
| chr12 | 31451939  | 31452476  |
| chr12 | 32305696  | 32306122  |
| chr12 | 32327460  | 32328555  |
| chr12 | 45421070  | 45421273  |
| chr12 | 45836740  | 45836991  |
| chr12 | 49460769  | 49461037  |

|       |           |           |
|-------|-----------|-----------|
| chr12 | 51067672  | 51067969  |
| chr12 | 51073822  | 51074082  |
| chr12 | 51662763  | 51663093  |
| chr12 | 52073574  | 52073902  |
| chr12 | 53018797  | 53019006  |
| chr12 | 53381658  | 53381813  |
| chr12 | 56210296  | 56210568  |
| chr12 | 56643402  | 56643587  |
| chr12 | 57250992  | 57251193  |
| chr12 | 62552880  | 62553174  |
| chr12 | 63802090  | 63802405  |
| chr12 | 6521797   | 6522037   |
| chr12 | 68302619  | 68302872  |
| chr12 | 72286680  | 72286954  |
| chr12 | 78006418  | 78007445  |
| chr12 | 78137176  | 78137365  |
| chr12 | 82857009  | 82857580  |
| chr12 | 8930434   | 8930927   |
| chr12 | 93678768  | 93679072  |
| chr12 | 95282312  | 95282644  |
| chr12 | 96246939  | 96247734  |
| chr13 | 19772241  | 19772543  |
| chr13 | 21045684  | 21046230  |
| chr13 | 21167987  | 21168399  |
| chr13 | 24222818  | 24224582  |
| chr13 | 24297362  | 24297735  |
| chr13 | 24455016  | 24455212  |
| chr13 | 27581296  | 27581803  |
| chr13 | 29517572  | 29517790  |
| chr13 | 29535818  | 29536202  |
| chr13 | 30283615  | 30283791  |
| chr13 | 30630834  | 30631474  |
| chr13 | 40559508  | 40560860  |
| chr13 | 51251467  | 51252201  |
| chr13 | 52024005  | 52024937  |
| chr13 | 72778186  | 72778380  |
| chr13 | 98213219  | 98213413  |
| chr13 | 98519242  | 98519473  |
| chr14 | 102085757 | 102086124 |
| chr14 | 102325984 | 102326887 |
| chr14 | 103405075 | 103405267 |
| chr14 | 103474992 | 103475210 |
| chr14 | 104166858 | 104167048 |
| chr14 | 20407872  | 20408463  |
| chr14 | 23033367  | 23033674  |

|       |           |           |
|-------|-----------|-----------|
| chr14 | 24974664  | 24974850  |
| chr14 | 30605504  | 30605812  |
| chr14 | 32433459  | 32433817  |
| chr14 | 34862043  | 34862322  |
| chr14 | 35053277  | 35053451  |
| chr14 | 39095897  | 39096139  |
| chr14 | 44945029  | 44945928  |
| chr14 | 45175070  | 45176976  |
| chr14 | 45246742  | 45247377  |
| chr14 | 50150007  | 50150230  |
| chr14 | 54702061  | 54702580  |
| chr14 | 54737023  | 54737287  |
| chr14 | 55612018  | 55612571  |
| chr14 | 59726918  | 59727668  |
| chr14 | 62950132  | 62950559  |
| chr14 | 64065431  | 64065650  |
| chr14 | 65561336  | 65561766  |
| chr14 | 69658512  | 69658713  |
| chr14 | 70742350  | 70742591  |
| chr14 | 70800666  | 70801080  |
| chr14 | 71101989  | 71102220  |
| chr14 | 71105234  | 71105440  |
| chr14 | 71587570  | 71589370  |
| chr14 | 71685361  | 71685631  |
| chr14 | 72993142  | 72993357  |
| chr14 | 73287109  | 73287314  |
| chr14 | 74692040  | 74692328  |
| chr14 | 80784894  | 80785545  |
| chr14 | 88550237  | 88550619  |
| chr14 | 88754511  | 88754671  |
| chr14 | 89411933  | 89412490  |
| chr14 | 92021555  | 92021831  |
| chr14 | 92651581  | 92653075  |
| chr14 | 93263784  | 93263993  |
| chr14 | 99257470  | 99257836  |
| chr14 | 99257470  | 99257839  |
| chr15 | 101235081 | 101235577 |
| chr15 | 22534067  | 22534243  |
| chr15 | 29053844  | 29054835  |
| chr15 | 34003031  | 34003209  |
| chr15 | 39617734  | 39618245  |
| chr15 | 40571603  | 40571900  |
| chr15 | 41668827  | 41669958  |
| chr15 | 41696074  | 41697023  |
| chr15 | 42736301  | 42736780  |

|       |          |          |
|-------|----------|----------|
| chr15 | 42751973 | 42753247 |
| chr15 | 44458990 | 44459200 |
| chr15 | 48644605 | 48644950 |
| chr15 | 49292326 | 49292537 |
| chr15 | 50643339 | 50643553 |
| chr15 | 58851770 | 58851965 |
| chr15 | 58899468 | 58899937 |
| chr15 | 59030803 | 59031702 |
| chr15 | 59080935 | 59081284 |
| chr15 | 63774693 | 63775649 |
| chr15 | 64300318 | 64300723 |
| chr15 | 64376742 | 64376905 |
| chr15 | 64823777 | 64824354 |
| chr15 | 65106095 | 65106359 |
| chr15 | 65500605 | 65500779 |
| chr15 | 71660529 | 71660734 |
| chr15 | 72045723 | 72046634 |
| chr15 | 74655732 | 74656068 |
| chr15 | 74671454 | 74671774 |
| chr15 | 75422646 | 75422823 |
| chr15 | 77133004 | 77133750 |
| chr15 | 79889092 | 79889354 |
| chr15 | 83041727 | 83041925 |
| chr15 | 85533583 | 85533880 |
| chr15 | 85655416 | 85655787 |
| chr15 | 89601736 | 89601976 |
| chr15 | 90067109 | 90068595 |
| chr15 | 90981747 | 90981981 |
| chr15 | 91915992 | 91916458 |
| chr15 | 92967324 | 92967513 |
| chr15 | 98707561 | 98708107 |
| chr16 | 11003073 | 11003305 |
| chr16 | 11123741 | 11123946 |
| chr16 | 12051846 | 12052222 |
| chr16 | 12704623 | 12705049 |
| chr16 | 14644273 | 14644609 |
| chr16 | 1602369  | 1602591  |
| chr16 | 16044449 | 16044680 |
| chr16 | 16056091 | 16056295 |
| chr16 | 1659885  | 1660063  |
| chr16 | 19871815 | 19872846 |
| chr16 | 2173181  | 2173399  |
| chr16 | 22225653 | 22225975 |
| chr16 | 22471627 | 22471852 |
| chr16 | 2319580  | 2319840  |

|       |          |          |
|-------|----------|----------|
| chr16 | 27545313 | 27545523 |
| chr16 | 2756333  | 2756606  |
| chr16 | 27749583 | 27750306 |
| chr16 | 29809539 | 29809764 |
| chr16 | 30704063 | 30704315 |
| chr16 | 3308312  | 3308836  |
| chr16 | 346147   | 347106   |
| chr16 | 3850296  | 3851009  |
| chr16 | 46909683 | 46909927 |
| chr16 | 48252130 | 48252365 |
| chr16 | 50078740 | 50079018 |
| chr16 | 50287911 | 50288350 |
| chr16 | 53155925 | 53157541 |
| chr16 | 53825863 | 53826491 |
| chr16 | 58534146 | 58534395 |
| chr16 | 58560211 | 58560362 |
| chr16 | 58599235 | 58599511 |
| chr16 | 67685456 | 67685802 |
| chr16 | 68121986 | 68123121 |
| chr16 | 68190767 | 68191775 |
| chr16 | 68274690 | 68275249 |
| chr16 | 68859883 | 68860524 |
| chr16 | 69284047 | 69284244 |
| chr16 | 69336504 | 69336712 |
| chr16 | 696772   | 697419   |
| chr16 | 69695135 | 69695379 |
| chr16 | 70120460 | 70120719 |
| chr16 | 70530744 | 70530917 |
| chr16 | 71714511 | 71714801 |
| chr16 | 72950468 | 72950965 |
| chr16 | 74360632 | 74360891 |
| chr16 | 74651919 | 74652122 |
| chr16 | 74660931 | 74661451 |
| chr16 | 75242469 | 75243090 |
| chr16 | 80684537 | 80685129 |
| chr16 | 84101620 | 84102107 |
| chr16 | 84744632 | 84745673 |
| chr16 | 85633913 | 85634132 |
| chr16 | 9102983  | 9103259  |
| chr16 | 954356   | 954666   |
| chr17 | 1364858  | 1365058  |
| chr17 | 1436619  | 1437155  |
| chr17 | 1436789  | 1437155  |
| chr17 | 16061400 | 16061894 |
| chr17 | 16101249 | 16101805 |

|       |          |          |
|-------|----------|----------|
| chr17 | 1799856  | 1801024  |
| chr17 | 19958013 | 19958571 |
| chr17 | 20204332 | 20205912 |
| chr17 | 2638098  | 2638320  |
| chr17 | 28628264 | 28628559 |
| chr17 | 29285991 | 29287716 |
| chr17 | 30803900 | 30804108 |
| chr17 | 30904065 | 30904529 |
| chr17 | 31325819 | 31326252 |
| chr17 | 31988319 | 31988497 |
| chr17 | 3518575  | 3518850  |
| chr17 | 35362738 | 35363826 |
| chr17 | 37161780 | 37162050 |
| chr17 | 37330172 | 37330425 |
| chr17 | 37553114 | 37554059 |
| chr17 | 38716366 | 38716981 |
| chr17 | 40126182 | 40126406 |
| chr17 | 40330856 | 40331396 |
| chr17 | 4064360  | 4064829  |
| chr17 | 4242255  | 4242448  |
| chr17 | 43200166 | 43200608 |
| chr17 | 44117493 | 44117704 |
| chr17 | 44147857 | 44149027 |
| chr17 | 45475099 | 45475726 |
| chr17 | 46170854 | 46172232 |
| chr17 | 4940486  | 4940993  |
| chr17 | 4946627  | 4946820  |
| chr17 | 5331948  | 5332152  |
| chr17 | 58494931 | 58496330 |
| chr17 | 59353214 | 59353526 |
| chr17 | 59698870 | 59700189 |
| chr17 | 60623520 | 60623749 |
| chr17 | 62010549 | 62011233 |
| chr17 | 62664547 | 62664949 |
| chr17 | 63354782 | 63355390 |
| chr17 | 64212573 | 64214242 |
| chr17 | 6447462  | 6447758  |
| chr17 | 65053501 | 65053728 |
| chr17 | 6628116  | 6628741  |
| chr17 | 67853939 | 67854762 |
| chr17 | 68306942 | 68307711 |
| chr17 | 72849633 | 72849804 |
| chr17 | 73235475 | 73236995 |
| chr17 | 7448578  | 7448788  |
| chr17 | 76063975 | 76064171 |



|       |          |          |
|-------|----------|----------|
| chr17 | 77402058 | 77402703 |
| chr17 | 78031515 | 78031842 |
| chr17 | 783082   | 783327   |
| chr17 | 78400676 | 78400855 |
| chr17 | 78803384 | 78803978 |
| chr17 | 7945727  | 7945986  |
| chr17 | 80339200 | 80340356 |
| chr17 | 9022310  | 9023391  |
| chr18 | 13681604 | 13682105 |
| chr18 | 13731475 | 13731934 |
| chr18 | 21532472 | 21532660 |
| chr18 | 26285881 | 26286499 |
| chr18 | 2937691  | 2938037  |
| chr18 | 31931328 | 31931523 |
| chr18 | 37066889 | 37067545 |
| chr18 | 46215810 | 46216595 |
| chr18 | 46890579 | 46891054 |
| chr18 | 47115131 | 47115348 |
| chr18 | 47896520 | 47896809 |
| chr18 | 50984095 | 50984563 |
| chr18 | 51067018 | 51067187 |
| chr18 | 57731626 | 57731829 |
| chr18 | 756556   | 756835   |
| chr18 | 76378854 | 76380303 |
| chr18 | 76441244 | 76443211 |
| chr18 | 77016831 | 77017268 |
| chr18 | 79410402 | 79411501 |
| chr18 | 8824698  | 8826232  |
| chr18 | 9522159  | 9522509  |
| chr19 | 10143765 | 10143987 |
| chr19 | 10491576 | 10492262 |
| chr19 | 10499394 | 10500080 |
| chr19 | 11113534 | 11113762 |
| chr19 | 13025020 | 13025552 |
| chr19 | 13993524 | 13993895 |
| chr19 | 15272814 | 15273133 |
| chr19 | 16500791 | 16501551 |
| chr19 | 16509498 | 16509988 |
| chr19 | 17101659 | 17102557 |
| chr19 | 17497254 | 17497464 |
| chr19 | 18147442 | 18147624 |
| chr19 | 19296988 | 19297344 |
| chr19 | 19465339 | 19465614 |
| chr19 | 19498442 | 19498722 |
| chr19 | 1969507  | 1969959  |

|       |           |           |
|-------|-----------|-----------|
| chr19 | 27797753  | 27798176  |
| chr19 | 30012284  | 30012531  |
| chr19 | 32352828  | 32354957  |
| chr19 | 32953614  | 32953801  |
| chr19 | 3381711   | 3382243   |
| chr19 | 34221506  | 34221738  |
| chr19 | 3550983   | 3551194   |
| chr19 | 3623687   | 3624162   |
| chr19 | 38119305  | 38119882  |
| chr19 | 38130497  | 38130772  |
| chr19 | 39422114  | 39422288  |
| chr19 | 39453355  | 39453521  |
| chr19 | 4053970   | 4055247   |
| chr19 | 40557022  | 40557403  |
| chr19 | 4117418   | 4117629   |
| chr19 | 41292244  | 41292511  |
| chr19 | 41378280  | 41378519  |
| chr19 | 4408902   | 4409759   |
| chr19 | 4433069   | 4433539   |
| chr19 | 44707860  | 44708187  |
| chr19 | 44907759  | 44907952  |
| chr19 | 45271471  | 45271708  |
| chr19 | 45421177  | 45421393  |
| chr19 | 45831383  | 45831588  |
| chr19 | 47352753  | 47353735  |
| chr19 | 47355038  | 47355350  |
| chr19 | 47362475  | 47362693  |
| chr19 | 47716557  | 47717016  |
| chr19 | 47725811  | 47726224  |
| chr19 | 48182454  | 48182767  |
| chr19 | 48446680  | 48446843  |
| chr19 | 48633443  | 48633655  |
| chr19 | 49196439  | 49196874  |
| chr19 | 49601490  | 49601918  |
| chr19 | 54458313  | 54458521  |
| chr19 | 5648988   | 5649499   |
| chr19 | 58089864  | 58090386  |
| chr19 | 6270578   | 6270759   |
| chr19 | 7184315   | 7184637   |
| chr19 | 7444203   | 7444454   |
| chr19 | 7462151   | 7462334   |
| chr1  | 101075394 | 101075716 |
| chr1  | 1022200   | 1022462   |
| chr1  | 11013715  | 11013965  |
| chr1  | 110222963 | 110223900 |

|      |           |           |
|------|-----------|-----------|
| chr1 | 111147641 | 111148053 |
| chr1 | 112917177 | 112918044 |
| chr1 | 113797362 | 113798036 |
| chr1 | 113904604 | 113904793 |
| chr1 | 113908008 | 113908191 |
| chr1 | 113940381 | 113941459 |
| chr1 | 116544310 | 116544604 |
| chr1 | 12275824  | 12278038  |
| chr1 | 12506852  | 12507093  |
| chr1 | 13778417  | 13782831  |
| chr1 | 150334934 | 150335241 |
| chr1 | 150446225 | 150446401 |
| chr1 | 150457287 | 150457570 |
| chr1 | 150460059 | 150460317 |
| chr1 | 151161735 | 151162100 |
| chr1 | 151236557 | 151236763 |
| chr1 | 151315572 | 151316509 |
| chr1 | 151638887 | 151639119 |
| chr1 | 151658234 | 151658427 |
| chr1 | 153949114 | 153949384 |
| chr1 | 154601040 | 154602626 |
| chr1 | 155338088 | 155338390 |
| chr1 | 15536474  | 15536814  |
| chr1 | 155438326 | 155439068 |
| chr1 | 155477885 | 155482449 |
| chr1 | 155521099 | 155521618 |
| chr1 | 155777621 | 155777820 |
| chr1 | 155853275 | 155853806 |
| chr1 | 156135900 | 156136121 |
| chr1 | 156199834 | 156200472 |
| chr1 | 15872815  | 15873136  |
| chr1 | 16148377  | 16149047  |
| chr1 | 162566011 | 162566348 |
| chr1 | 168104476 | 168104894 |
| chr1 | 169477154 | 169477757 |
| chr1 | 173802962 | 173803505 |
| chr1 | 179341027 | 179341310 |
| chr1 | 182884612 | 182884813 |
| chr1 | 200760838 | 200761098 |
| chr1 | 201817087 | 201817285 |
| chr1 | 202924967 | 202925207 |
| chr1 | 203847183 | 203847687 |
| chr1 | 205187417 | 205187806 |
| chr1 | 205268949 | 205269884 |
| chr1 | 206205428 | 206206037 |

|      |           |           |
|------|-----------|-----------|
| chr1 | 20941490  | 20942330  |
| chr1 | 210919639 | 210920069 |
| chr1 | 212100251 | 212101084 |
| chr1 | 214464629 | 214464957 |
| chr1 | 221706094 | 221706466 |
| chr1 | 223798214 | 223798677 |
| chr1 | 225023614 | 225023865 |
| chr1 | 225987895 | 225988388 |
| chr1 | 227028656 | 227029250 |
| chr1 | 227747691 | 227748233 |
| chr1 | 233258027 | 233259344 |
| chr1 | 233262957 | 233263163 |
| chr1 | 23960928  | 23961134  |
| chr1 | 24514313  | 24514567  |
| chr1 | 246591511 | 246591941 |
| chr1 | 247418052 | 247419077 |
| chr1 | 26255170  | 26255865  |
| chr1 | 26794112  | 26795234  |
| chr1 | 26897300  | 26897725  |
| chr1 | 28473553  | 28474151  |
| chr1 | 28480450  | 28480604  |
| chr1 | 28742402  | 28743986  |
| chr1 | 28987430  | 28987905  |
| chr1 | 29154695  | 29154910  |
| chr1 | 29275447  | 29275756  |
| chr1 | 30721287  | 30721722  |
| chr1 | 31059203  | 31059577  |
| chr1 | 31918969  | 31919658  |
| chr1 | 32592930  | 32593754  |
| chr1 | 35415465  | 35415714  |
| chr1 | 35478965  | 35479212  |
| chr1 | 35746765  | 35746992  |
| chr1 | 39368147  | 39368314  |
| chr1 | 39547578  | 39548951  |
| chr1 | 41142877  | 41143112  |
| chr1 | 41628748  | 41628947  |
| chr1 | 42278347  | 42278672  |
| chr1 | 44008352  | 44008623  |
| chr1 | 44411980  | 44412722  |
| chr1 | 45087880  | 45088237  |
| chr1 | 45457563  | 45457871  |
| chr1 | 4711899   | 4712699   |
| chr1 | 52525562  | 52526373  |
| chr1 | 54209945  | 54210131  |
| chr1 | 58681784  | 58682545  |

|       |          |          |
|-------|----------|----------|
| chr1  | 59321535 | 59321750 |
| chr1  | 6231901  | 6232119  |
| chr1  | 62447340 | 62447511 |
| chr1  | 6599046  | 6599452  |
| chr1  | 68494429 | 68494695 |
| chr1  | 76313804 | 76313999 |
| chr1  | 77631849 | 77633405 |
| chr1  | 78013050 | 78013619 |
| chr1  | 81907016 | 81907230 |
| chr1  | 84865384 | 84866138 |
| chr1  | 85164525 | 85164757 |
| chr1  | 85190056 | 85190752 |
| chr1  | 88740987 | 88741288 |
| chr1  | 93674613 | 93674941 |
| chr20 | 11918333 | 11918601 |
| chr20 | 17969800 | 17970370 |
| chr20 | 2116665  | 2117415  |
| chr20 | 33379460 | 33379691 |
| chr20 | 33573973 | 33574261 |
| chr20 | 33611093 | 33611335 |
| chr20 | 34105367 | 34105545 |
| chr20 | 35477870 | 35478101 |
| chr20 | 35842572 | 35842744 |
| chr20 | 35899369 | 35899648 |
| chr20 | 36578740 | 36578966 |
| chr20 | 36793248 | 36794599 |
| chr20 | 37044085 | 37044250 |
| chr20 | 37184179 | 37184373 |
| chr20 | 41533049 | 41533570 |
| chr20 | 43702489 | 43702903 |
| chr20 | 46240962 | 46241257 |
| chr20 | 47246007 | 47246517 |
| chr20 | 47276313 | 47276795 |
| chr20 | 49269941 | 49271750 |
| chr20 | 51009564 | 51010364 |
| chr20 | 62893665 | 62894194 |
| chr20 | 63202286 | 63203807 |
| chr20 | 63619266 | 63619454 |
| chr20 | 63775677 | 63775962 |
| chr20 | 63789820 | 63790790 |
| chr21 | 29321220 | 29321514 |
| chr21 | 31266009 | 31266983 |
| chr21 | 36896859 | 36897131 |
| chr21 | 46168307 | 46168658 |
| chr21 | 46334396 | 46334768 |

|       |           |           |
|-------|-----------|-----------|
| chr22 | 19253958  | 19254227  |
| chr22 | 19977414  | 19977586  |
| chr22 | 20488984  | 20489244  |
| chr22 | 20554935  | 20555148  |
| chr22 | 20933778  | 20934244  |
| chr22 | 21610856  | 21611043  |
| chr22 | 23095246  | 23096418  |
| chr22 | 24187958  | 24188135  |
| chr22 | 25375812  | 25376008  |
| chr22 | 28163091  | 28163599  |
| chr22 | 28734402  | 28734727  |
| chr22 | 30972854  | 30973587  |
| chr22 | 31462931  | 31463133  |
| chr22 | 31738386  | 31738911  |
| chr22 | 32478980  | 32479275  |
| chr22 | 33761370  | 33761558  |
| chr22 | 35809779  | 35810004  |
| chr22 | 36348903  | 36349255  |
| chr22 | 40881769  | 40882177  |
| chr22 | 41117186  | 41117821  |
| chr22 | 41650722  | 41650891  |
| chr22 | 42209650  | 42215341  |
| chr22 | 42890946  | 42891182  |
| chr22 | 45178237  | 45178900  |
| chr22 | 45842990  | 45843178  |
| chr22 | 46198341  | 46198591  |
| chr22 | 46463706  | 46464345  |
| chr22 | 49822950  | 49824331  |
| chr22 | 50240203  | 50240367  |
| chr22 | 50265320  | 50265494  |
| chr2  | 10419733  | 10420135  |
| chr2  | 10441508  | 10441723  |
| chr2  | 105307613 | 105308318 |
| chr2  | 105342847 | 105343223 |
| chr2  | 109347673 | 109347949 |
| chr2  | 111123732 | 111124139 |
| chr2  | 111863674 | 111863895 |
| chr2  | 112502911 | 112503181 |
| chr2  | 118096418 | 118096800 |
| chr2  | 121605700 | 121606180 |
| chr2  | 127293512 | 127293718 |
| chr2  | 127954985 | 127955344 |
| chr2  | 127989563 | 127989866 |
| chr2  | 159282671 | 159283093 |
| chr2  | 173954872 | 173956232 |

|      |           |           |
|------|-----------|-----------|
| chr2 | 174877839 | 174878128 |
| chr2 | 189863742 | 189864228 |
| chr2 | 191693202 | 191693416 |
| chr2 | 196433131 | 196433458 |
| chr2 | 200419249 | 200419496 |
| chr2 | 201266486 | 201266791 |
| chr2 | 201284815 | 201285317 |
| chr2 | 201420416 | 201420706 |
| chr2 | 201760880 | 201761818 |
| chr2 | 202518821 | 202519052 |
| chr2 | 202555251 | 202556531 |
| chr2 | 205440369 | 205440672 |
| chr2 | 207123773 | 207124404 |
| chr2 | 207976650 | 207977586 |
| chr2 | 210153494 | 210154611 |
| chr2 | 214780559 | 214781509 |
| chr2 | 218474629 | 218474885 |
| chr2 | 218656149 | 218656463 |
| chr2 | 219252007 | 219252230 |
| chr2 | 222908732 | 222909150 |
| chr2 | 229858771 | 229859574 |
| chr2 | 230045744 | 230046722 |
| chr2 | 232087486 | 232087721 |
| chr2 | 235040887 | 235043247 |
| chr2 | 23823257  | 23823569  |
| chr2 | 24080818  | 24081031  |
| chr2 | 241373083 | 241373290 |
| chr2 | 241468139 | 241468377 |
| chr2 | 241632916 | 241634079 |
| chr2 | 25313912  | 25314161  |
| chr2 | 25628170  | 25628384  |
| chr2 | 27607844  | 27608039  |
| chr2 | 32414768  | 32416163  |
| chr2 | 33020908  | 33021206  |
| chr2 | 36396613  | 36396787  |
| chr2 | 36517326  | 36517542  |
| chr2 | 38343267  | 38343512  |
| chr2 | 40428472  | 40430304  |
| chr2 | 42682400  | 42682589  |
| chr2 | 44201185  | 44202045  |
| chr2 | 48346200  | 48346751  |
| chr2 | 55025085  | 55027485  |
| chr2 | 55598415  | 55599039  |
| chr2 | 61031418  | 61032113  |
| chr2 | 62000700  | 62000982  |

|      |           |           |
|------|-----------|-----------|
| chr2 | 63404047  | 63404657  |
| chr2 | 71189844  | 71190021  |
| chr2 | 71348752  | 71350271  |
| chr2 | 71426459  | 71427414  |
| chr2 | 74046277  | 74048411  |
| chr2 | 84870224  | 84870785  |
| chr2 | 85356966  | 85357252  |
| chr2 | 85542564  | 85542747  |
| chr2 | 86151296  | 86151520  |
| chr2 | 95405552  | 95405803  |
| chr3 | 101785401 | 101785689 |
| chr3 | 10238747  | 10239039  |
| chr3 | 114350273 | 114351878 |
| chr3 | 120750522 | 120751000 |
| chr3 | 122565858 | 122566070 |
| chr3 | 125313307 | 125313656 |
| chr3 | 127639244 | 127639523 |
| chr3 | 128637798 | 128638105 |
| chr3 | 129670329 | 129671264 |
| chr3 | 129827802 | 129828508 |
| chr3 | 129880308 | 129880559 |
| chr3 | 134361511 | 134361807 |
| chr3 | 134370699 | 134371494 |
| chr3 | 136604308 | 136604473 |
| chr3 | 136945582 | 136946295 |
| chr3 | 142512259 | 142512470 |
| chr3 | 143985542 | 143985846 |
| chr3 | 150571957 | 150572529 |
| chr3 | 152299404 | 152300367 |
| chr3 | 156677656 | 156678614 |
| chr3 | 159764442 | 159765138 |
| chr3 | 169381186 | 169381524 |
| chr3 | 172251259 | 172251541 |
| chr3 | 181699597 | 181699883 |
| chr3 | 185689354 | 185689627 |
| chr3 | 188609160 | 188609844 |
| chr3 | 194427074 | 194427252 |
| chr3 | 196055079 | 196055301 |
| chr3 | 196362293 | 196362687 |
| chr3 | 196566876 | 196567307 |
| chr3 | 196885150 | 196886694 |
| chr3 | 19950805  | 19951061  |
| chr3 | 23900807  | 23901049  |
| chr3 | 31830039  | 31830231  |
| chr3 | 41398078  | 41398264  |



|      |           |           |
|------|-----------|-----------|
| chr3 | 41954621  | 41954807  |
| chr3 | 42200817  | 42201054  |
| chr3 | 43576691  | 43577261  |
| chr3 | 44455120  | 44455696  |
| chr3 | 44794216  | 44794426  |
| chr3 | 45110472  | 45110841  |
| chr3 | 47610065  | 47610327  |
| chr3 | 47998637  | 47998879  |
| chr3 | 48927461  | 48927813  |
| chr3 | 49510418  | 49510819  |
| chr3 | 51419733  | 51420997  |
| chr3 | 51590366  | 51590559  |
| chr3 | 51684412  | 51684634  |
| chr3 | 78938600  | 78938927  |
| chr3 | 94003658  | 94003908  |
| chr3 | 96987329  | 96987993  |
| chr3 | 9744223   | 9744508   |
| chr3 | 97864216  | 97864647  |
| chr3 | 9828959   | 9829395   |
| chr3 | 98881539  | 98881767  |
| chr4 | 109462900 | 109463644 |
| chr4 | 119606708 | 119607297 |
| chr4 | 123028185 | 123028395 |
| chr4 | 124709999 | 124711274 |
| chr4 | 139043073 | 139043343 |
| chr4 | 145514437 | 145515013 |
| chr4 | 145902165 | 145903215 |
| chr4 | 148435103 | 148436862 |
| chr4 | 150102477 | 150102812 |
| chr4 | 150908659 | 150908857 |
| chr4 | 152411302 | 152411872 |
| chr4 | 153295312 | 153296036 |
| chr4 | 157152717 | 157153010 |
| chr4 | 165310552 | 165310750 |
| chr4 | 169136317 | 169136620 |
| chr4 | 1727707   | 1728787   |
| chr4 | 173247979 | 173248440 |
| chr4 | 177353307 | 177353728 |
| chr4 | 184009157 | 184011423 |
| chr4 | 185175785 | 185176051 |
| chr4 | 1900625   | 1901251   |
| chr4 | 1918140   | 1918623   |
| chr4 | 25847293  | 25847864  |
| chr4 | 2630934   | 2631169   |
| chr4 | 26362445  | 26362628  |

|      |           |           |
|------|-----------|-----------|
| chr4 | 2672120   | 2672372   |
| chr4 | 2699679   | 2700544   |
| chr4 | 3253206   | 3253482   |
| chr4 | 3316069   | 3318051   |
| chr4 | 36228581  | 36229645  |
| chr4 | 37902002  | 37902512  |
| chr4 | 38993737  | 38993998  |
| chr4 | 41013582  | 41014398  |
| chr4 | 41142986  | 41143142  |
| chr4 | 48710518  | 48710698  |
| chr4 | 53145332  | 53145582  |
| chr4 | 55411613  | 55411839  |
| chr4 | 56019352  | 56019555  |
| chr4 | 65601640  | 65602304  |
| chr4 | 6824184   | 6824684   |
| chr4 | 6923372   | 6924111   |
| chr4 | 73090666  | 73092300  |
| chr4 | 84860411  | 84860622  |
| chr4 | 87195323  | 87195690  |
| chr5 | 10239066  | 10239356  |
| chr5 | 108798123 | 108798389 |
| chr5 | 111669418 | 111669635 |
| chr5 | 123545416 | 123545841 |
| chr5 | 126603569 | 126604183 |
| chr5 | 131315975 | 131316144 |
| chr5 | 133959493 | 133960020 |
| chr5 | 133980728 | 133980956 |
| chr5 | 134661118 | 134661586 |
| chr5 | 134741062 | 134741523 |
| chr5 | 134854897 | 134855327 |
| chr5 | 136153591 | 136154163 |
| chr5 | 137948954 | 137949184 |
| chr5 | 138418952 | 138419232 |
| chr5 | 139307238 | 139308327 |
| chr5 | 140194445 | 140194652 |
| chr5 | 142353225 | 142353583 |
| chr5 | 143399655 | 143400852 |
| chr5 | 14487463  | 14488260  |
| chr5 | 150520867 | 150521767 |
| chr5 | 150618102 | 150618767 |
| chr5 | 157791702 | 157791995 |
| chr5 | 160010499 | 160010858 |
| chr5 | 160093100 | 160094065 |
| chr5 | 168568645 | 168568998 |
| chr5 | 172234121 | 172234358 |

|      |           |           |
|------|-----------|-----------|
| chr5 | 173090314 | 173091401 |
| chr5 | 176289653 | 176290955 |
| chr5 | 176496485 | 176496663 |
| chr5 | 177531281 | 177531521 |
| chr5 | 177631365 | 177632738 |
| chr5 | 180571229 | 180571432 |
| chr5 | 19838758  | 19839242  |
| chr5 | 2749381   | 2749787   |
| chr5 | 31983154  | 31983656  |
| chr5 | 32414968  | 32415187  |
| chr5 | 33881118  | 33881480  |
| chr5 | 34822955  | 34824491  |
| chr5 | 41927012  | 41927248  |
| chr5 | 43161248  | 43161931  |
| chr5 | 43381800  | 43382052  |
| chr5 | 43453657  | 43454043  |
| chr5 | 61472680  | 61473037  |
| chr5 | 66053405  | 66054951  |
| chr5 | 677749    | 678064    |
| chr5 | 68226289  | 68227009  |
| chr5 | 69419370  | 69420531  |
| chr5 | 73840479  | 73840760  |
| chr5 | 73911274  | 73911575  |
| chr5 | 74634683  | 74636498  |
| chr5 | 77118319  | 77118521  |
| chr5 | 78509783  | 78510398  |
| chr5 | 98779579  | 98780088  |
| chr6 | 100848147 | 100848707 |
| chr6 | 107633513 | 107635469 |
| chr6 | 108663454 | 108664889 |
| chr6 | 109481074 | 109482054 |
| chr6 | 128322038 | 128322310 |
| chr6 | 138255435 | 138255769 |
| chr6 | 138291732 | 138292053 |
| chr6 | 138333969 | 138335188 |
| chr6 | 144577098 | 144577288 |
| chr6 | 145804371 | 145806421 |
| chr6 | 149378017 | 149379518 |
| chr6 | 149623102 | 149623283 |
| chr6 | 149683078 | 149684592 |
| chr6 | 149701778 | 149702266 |
| chr6 | 15496131  | 15497170  |
| chr6 | 157084661 | 157084905 |
| chr6 | 161048615 | 161049979 |
| chr6 | 17625807  | 17626164  |

|      |           |           |
|------|-----------|-----------|
| chr6 | 17688395  | 17688618  |
| chr6 | 22020338  | 22020542  |
| chr6 | 31663852  | 31664580  |
| chr6 | 32971594  | 32972927  |
| chr6 | 34132977  | 34133859  |
| chr6 | 34606554  | 34606904  |
| chr6 | 34646600  | 34646798  |
| chr6 | 35017472  | 35018059  |
| chr6 | 35410986  | 35411217  |
| chr6 | 35423945  | 35424148  |
| chr6 | 36211257  | 36211560  |
| chr6 | 38061592  | 38061775  |
| chr6 | 42268153  | 42269848  |
| chr6 | 42573733  | 42573993  |
| chr6 | 42828492  | 42830172  |
| chr6 | 42966241  | 42966447  |
| chr6 | 44250290  | 44250599  |
| chr6 | 4891712   | 4892379   |
| chr6 | 4935514   | 4935771   |
| chr6 | 52452687  | 52454287  |
| chr6 | 5368549   | 5369182   |
| chr6 | 63646526  | 63646795  |
| chr6 | 73440208  | 73440445  |
| chr6 | 75702644  | 75703072  |
| chr6 | 81751589  | 81752178  |
| chr6 | 82214226  | 82214829  |
| chr6 | 82240165  | 82240843  |
| chr6 | 83125499  | 83125733  |
| chr6 | 89725198  | 89725396  |
| chr6 | 89781398  | 89781592  |
| chr6 | 89803327  | 89803554  |
| chr7 | 100591666 | 100591902 |
| chr7 | 100856867 | 100857176 |
| chr7 | 1009949   | 1010143   |
| chr7 | 102178468 | 102178657 |
| chr7 | 102227366 | 102227669 |
| chr7 | 102438943 | 102439181 |
| chr7 | 103128482 | 103128792 |
| chr7 | 105203627 | 105203785 |
| chr7 | 105508114 | 105508544 |
| chr7 | 105665065 | 105665288 |
| chr7 | 112286872 | 112287074 |
| chr7 | 116699070 | 116700284 |
| chr7 | 123496695 | 123496906 |
| chr7 | 128479157 | 128479513 |

|      |           |           |
|------|-----------|-----------|
| chr7 | 135438157 | 135438423 |
| chr7 | 138871156 | 138871362 |
| chr7 | 139715931 | 139717015 |
| chr7 | 143381556 | 143381779 |
| chr7 | 149153944 | 149154340 |
| chr7 | 152176190 | 152178010 |
| chr7 | 1569123   | 1569360   |
| chr7 | 18666212  | 18666476  |
| chr7 | 195553    | 195732    |
| chr7 | 21481923  | 21482123  |
| chr7 | 23185069  | 23185298  |
| chr7 | 23611170  | 23611553  |
| chr7 | 2364371   | 2364529   |
| chr7 | 2369471   | 2369682   |
| chr7 | 2794927   | 2795143   |
| chr7 | 30456720  | 30457042  |
| chr7 | 36356901  | 36357590  |
| chr7 | 39987598  | 39988258  |
| chr7 | 42148225  | 42148468  |
| chr7 | 43595900  | 43596113  |
| chr7 | 47368364  | 47369621  |
| chr7 | 4740837   | 4741023   |
| chr7 | 4877604   | 4878203   |
| chr7 | 5287805   | 5287985   |
| chr7 | 5287808   | 5287985   |
| chr7 | 5312502   | 5313863   |
| chr7 | 5370374   | 5371364   |
| chr7 | 5500487   | 5502031   |
| chr7 | 5641153   | 5641376   |
| chr7 | 5740972   | 5741644   |
| chr7 | 5740972   | 5741815   |
| chr7 | 6017813   | 6018045   |
| chr7 | 6111124   | 6111374   |
| chr7 | 6153755   | 6155195   |
| chr7 | 6466070   | 6466323   |
| chr7 | 6591645   | 6591867   |
| chr7 | 66240324  | 66241270  |
| chr7 | 66286510  | 66286709  |
| chr7 | 66805139  | 66805396  |
| chr7 | 66944975  | 66945261  |
| chr7 | 66993216  | 66993417  |
| chr7 | 67017852  | 67018143  |
| chr7 | 6737075   | 6737936   |
| chr7 | 69899285  | 69899498  |
| chr7 | 7234302   | 7234539   |

|      |           |           |
|------|-----------|-----------|
| chr7 | 72831601  | 72831798  |
| chr7 | 74338447  | 74339004  |
| chr7 | 77749423  | 77750064  |
| chr7 | 83134249  | 83135656  |
| chr7 | 90726566  | 90726812  |
| chr7 | 91973710  | 91973968  |
| chr7 | 92294888  | 92295166  |
| chr7 | 92307358  | 92307656  |
| chr7 | 99388038  | 99388261  |
| chr7 | 99434789  | 99435268  |
| chr7 | 99525812  | 99526418  |
| chr8 | 100261541 | 100261755 |
| chr8 | 100287500 | 100288267 |
| chr8 | 103697085 | 103697296 |
| chr8 | 103766226 | 103766537 |
| chr8 | 103885297 | 103886223 |
| chr8 | 11444030  | 11444808  |
| chr8 | 116726015 | 116726172 |
| chr8 | 118580714 | 118580893 |
| chr8 | 119801793 | 119802025 |
| chr8 | 120515924 | 120516191 |
| chr8 | 123231299 | 123231757 |
| chr8 | 130091972 | 130092143 |
| chr8 | 140585118 | 140585311 |
| chr8 | 140890542 | 140890769 |
| chr8 | 141253988 | 141254629 |
| chr8 | 142343965 | 142344472 |
| chr8 | 143440040 | 143440363 |
| chr8 | 143803646 | 143803940 |
| chr8 | 144580845 | 144581277 |
| chr8 | 1565682   | 1565894   |
| chr8 | 19319343  | 19319728  |
| chr8 | 27294079  | 27294310  |
| chr8 | 28970042  | 28970519  |
| chr8 | 30069641  | 30070059  |
| chr8 | 33388962  | 33389798  |
| chr8 | 37846853  | 37847175  |
| chr8 | 37877108  | 37877551  |
| chr8 | 38347496  | 38348215  |
| chr8 | 38819521  | 38820635  |
| chr8 | 41598291  | 41599304  |
| chr8 | 42436988  | 42437577  |
| chr8 | 47440322  | 47440542  |
| chr8 | 47893138  | 47893387  |
| chr8 | 55762634  | 55763028  |

|      |           |           |
|------|-----------|-----------|
| chr8 | 60741258  | 60743097  |
| chr8 | 63186146  | 63187745  |
| chr8 | 67095292  | 67095732  |
| chr8 | 73688653  | 73688813  |
| chr8 | 74244528  | 74245175  |
| chr8 | 80499493  | 80500382  |
| chr8 | 86402018  | 86402203  |
| chr8 | 88167668  | 88167973  |
| chr8 | 94491577  | 94491909  |
| chr8 | 9580158   | 9580383   |
| chr8 | 96784863  | 96785330  |
| chr8 | 98547968  | 98548161  |
| chr8 | 99511103  | 99511512  |
| chr9 | 100441905 | 100442356 |
| chr9 | 104127285 | 104127480 |
| chr9 | 110136126 | 110138539 |
| chr9 | 110156318 | 110156497 |
| chr9 | 110941420 | 110942168 |
| chr9 | 112574056 | 112575251 |
| chr9 | 113988320 | 113988580 |
| chr9 | 116651527 | 116651793 |
| chr9 | 120518426 | 120518645 |
| chr9 | 120787768 | 120788278 |
| chr9 | 121150169 | 121150483 |
| chr9 | 121989194 | 121989770 |
| chr9 | 124535877 | 124536132 |
| chr9 | 125298889 | 125299106 |
| chr9 | 127890636 | 127891043 |
| chr9 | 127912267 | 127912680 |
| chr9 | 128185546 | 128185776 |
| chr9 | 128345154 | 128345549 |
| chr9 | 128508875 | 128509097 |
| chr9 | 128907156 | 128909321 |
| chr9 | 129502396 | 129503139 |
| chr9 | 129503322 | 129503672 |
| chr9 | 131459163 | 131459356 |
| chr9 | 131470787 | 131470983 |
| chr9 | 135882815 | 135883078 |
| chr9 | 136049635 | 136050580 |
| chr9 | 137180180 | 137180384 |
| chr9 | 137716625 | 137717182 |
| chr9 | 137728348 | 137728529 |
| chr9 | 19276157  | 19276479  |
| chr9 | 19331977  | 19332184  |
| chr9 | 2161685   | 2161903   |

|      |           |           |
|------|-----------|-----------|
| chr9 | 22820737  | 22821598  |
| chr9 | 23762005  | 23762249  |
| chr9 | 26919309  | 26919529  |
| chr9 | 27359033  | 27359236  |
| chr9 | 27455132  | 27455748  |
| chr9 | 33294419  | 33295427  |
| chr9 | 33948373  | 33948587  |
| chr9 | 34241184  | 34242108  |
| chr9 | 35546429  | 35548535  |
| chr9 | 36246030  | 36246482  |
| chr9 | 37126311  | 37126942  |
| chr9 | 4117767   | 4118881   |
| chr9 | 4286037   | 4286523   |
| chr9 | 6433913   | 6434173   |
| chr9 | 6984165   | 6984404   |
| chr9 | 710803    | 713464    |
| chr9 | 71740062  | 71740232  |
| chr9 | 71750042  | 71750385  |
| chr9 | 71874613  | 71875083  |
| chr9 | 83677726  | 83677961  |
| chr9 | 88426381  | 88426591  |
| chr9 | 88462495  | 88462749  |
| chr9 | 95880868  | 95881293  |
| chr9 | 96458378  | 96458541  |
| chr9 | 99137858  | 99138089  |
| chrX | 103585858 | 103586107 |
| chrX | 10566887  | 10567603  |
| chrX | 107088435 | 107088839 |
| chrX | 119410189 | 119410362 |
| chrX | 123885630 | 123886539 |
| chrX | 130024989 | 130025379 |
| chrX | 132054630 | 132054861 |
| chrX | 148661907 | 148662768 |
| chrX | 155506897 | 155507134 |
| chrX | 24179182  | 24179770  |
| chrX | 361404    | 361590    |
| chrX | 41123470  | 41123724  |
| chrX | 48925846  | 48926050  |
| chrX | 53411994  | 53412253  |
| chrX | 71378823  | 71379031  |
| chrX | 71567499  | 71567752  |

**MultiExon (27501)**

|       |         |         |
|-------|---------|---------|
| chr10 | 1000676 | 1001013 |
| chr10 | 1000676 | 1007128 |
| chr10 | 1000676 | 1009580 |



|       |           |           |
|-------|-----------|-----------|
| chr10 | 1000947   | 1007128   |
| chr10 | 100154859 | 100176070 |
| chr10 | 100174207 | 100179247 |
| chr10 | 100190868 | 100205199 |
| chr10 | 100204505 | 100218130 |
| chr10 | 100217994 | 100222980 |
| chr10 | 100243697 | 100246935 |
| chr10 | 100243697 | 100250332 |
| chr10 | 100243697 | 100253539 |
| chr10 | 100243697 | 100256476 |
| chr10 | 100245798 | 100246935 |
| chr10 | 100256261 | 100260319 |
| chr10 | 100256261 | 100262063 |
| chr10 | 100260217 | 100262063 |
| chr10 | 100497666 | 100498207 |
| chr10 | 100507424 | 100509102 |
| chr10 | 100536410 | 100546049 |
| chr10 | 1005817   | 1007128   |
| chr10 | 1005817   | 1009580   |
| chr10 | 100750693 | 100781365 |
| chr10 | 100779497 | 100781365 |
| chr10 | 100779497 | 100787011 |
| chr10 | 100806429 | 100809236 |
| chr10 | 100915998 | 100918441 |
| chr10 | 100918383 | 100926019 |
| chr10 | 100923974 | 100926019 |
| chr10 | 100923974 | 100931078 |
| chr10 | 100923974 | 100938736 |
| chr10 | 100937401 | 100944128 |
| chr10 | 100937401 | 100959496 |
| chr10 | 100950675 | 100959496 |
| chr10 | 100990435 | 100991054 |
| chr10 | 101584601 | 101585478 |
| chr10 | 101584601 | 101586156 |
| chr10 | 101624744 | 101676436 |
| chr10 | 101667885 | 101673673 |
| chr10 | 101667885 | 101676436 |
| chr10 | 101672914 | 101673673 |
| chr10 | 101672914 | 101676436 |
| chr10 | 101790895 | 101798154 |
| chr10 | 101792838 | 101807901 |
| chr10 | 101798841 | 101800400 |
| chr10 | 101798841 | 101804019 |
| chr10 | 101798841 | 101807901 |
| chr10 | 101798841 | 101810314 |

|       |           |           |
|-------|-----------|-----------|
| chr10 | 101798841 | 101813606 |
| chr10 | 101800241 | 101807901 |
| chr10 | 101800241 | 101810314 |
| chr10 | 101806044 | 101813606 |
| chr10 | 101889411 | 101957732 |
| chr10 | 101889411 | 102025248 |
| chr10 | 101939862 | 101957732 |
| chr10 | 101939862 | 101975300 |
| chr10 | 101939862 | 101992038 |
| chr10 | 101975211 | 101995355 |
| chr10 | 101975211 | 102014024 |
| chr10 | 101990550 | 102002072 |
| chr10 | 101990550 | 102009449 |
| chr10 | 101990550 | 102029745 |
| chr10 | 102001970 | 102014024 |
| chr10 | 102006539 | 102040125 |
| chr10 | 102013967 | 102040125 |
| chr10 | 102023476 | 102025248 |
| chr10 | 102023476 | 102029745 |
| chr10 | 102023476 | 102033339 |
| chr10 | 102023476 | 102040125 |
| chr10 | 102025155 | 102033339 |
| chr10 | 102029637 | 102033339 |
| chr10 | 102029637 | 102040125 |
| chr10 | 102033025 | 102040125 |
| chr10 | 102109028 | 102111300 |
| chr10 | 102109028 | 102111536 |
| chr10 | 102157018 | 102158214 |
| chr10 | 102258928 | 102260116 |
| chr10 | 102351255 | 102353654 |
| chr10 | 102358038 | 102359435 |
| chr10 | 102360183 | 102370860 |
| chr10 | 102361021 | 102363798 |
| chr10 | 102362474 | 102363798 |
| chr10 | 102362474 | 102365599 |
| chr10 | 102366382 | 102367210 |
| chr10 | 102375358 | 102377128 |
| chr10 | 102375358 | 102377140 |
| chr10 | 102397526 | 102398085 |
| chr10 | 102397980 | 102398297 |
| chr10 | 102465981 | 102469197 |
| chr10 | 102473569 | 102474012 |
| chr10 | 102484159 | 102485733 |
| chr10 | 102592581 | 102597293 |
| chr10 | 102592581 | 102599544 |

|       |           |           |
|-------|-----------|-----------|
| chr10 | 102654652 | 102656385 |
| chr10 | 102685815 | 102705489 |
| chr10 | 102699372 | 102705489 |
| chr10 | 102726611 | 102727157 |
| chr10 | 102731722 | 102733603 |
| chr10 | 102872447 | 102874661 |
| chr10 | 102872447 | 102878991 |
| chr10 | 103091563 | 103095980 |
| chr10 | 103099925 | 103174982 |
| chr10 | 103139405 | 103174982 |
| chr10 | 103139405 | 103181328 |
| chr10 | 103174857 | 103181328 |
| chr10 | 103314185 | 103333952 |
| chr10 | 103326533 | 103348999 |
| chr10 | 103345023 | 103347450 |
| chr10 | 103345023 | 103348999 |
| chr10 | 103347237 | 103348999 |
| chr10 | 103373357 | 103380019 |
| chr10 | 103378234 | 103379771 |
| chr10 | 103432128 | 103434975 |
| chr10 | 103438014 | 103438808 |
| chr10 | 103439745 | 103440850 |
| chr10 | 103897547 | 103910622 |
| chr10 | 103990674 | 103993133 |
| chr10 | 104008176 | 104018908 |
| chr10 | 104122964 | 104124124 |
| chr10 | 104259575 | 104263077 |
| chr10 | 1072115   | 1078003   |
| chr10 | 1072115   | 1080476   |
| chr10 | 1072115   | 1086357   |
| chr10 | 1072115   | 1096246   |
| chr10 | 1072115   | 1105267   |
| chr10 | 10786644  | 10792525  |
| chr10 | 1080010   | 1080476   |
| chr10 | 1080010   | 1086357   |
| chr10 | 1080010   | 1096246   |
| chr10 | 1084402   | 1086357   |
| chr10 | 1084402   | 1096246   |
| chr10 | 1084402   | 1105267   |
| chr10 | 1093451   | 1105267   |
| chr10 | 109893011 | 109915099 |
| chr10 | 109907690 | 109915099 |
| chr10 | 110100624 | 110119354 |
| chr10 | 110100624 | 110122292 |
| chr10 | 110100624 | 110124274 |

|       |           |           |
|-------|-----------|-----------|
| chr10 | 110118586 | 110124274 |
| chr10 | 110125825 | 110130486 |
| chr10 | 1103601   | 1105267   |
| chr10 | 110502720 | 110507154 |
| chr10 | 110581922 | 110582642 |
| chr10 | 110589604 | 110591132 |
| chr10 | 110593072 | 110598290 |
| chr10 | 110596397 | 110598290 |
| chr10 | 110780800 | 110784889 |
| chr10 | 110881232 | 110883097 |
| chr10 | 110964124 | 110985765 |
| chr10 | 110985627 | 111004794 |
| chr10 | 112168852 | 112173066 |
| chr10 | 1124217   | 1125024   |
| chr10 | 112527086 | 112538330 |
| chr10 | 112951206 | 113146097 |
| chr10 | 113040024 | 113089540 |
| chr10 | 113141183 | 113146097 |
| chr10 | 113721031 | 113726434 |
| chr10 | 113876520 | 113884380 |
| chr10 | 113898109 | 113905036 |
| chr10 | 11481769  | 11485911  |
| chr10 | 11481769  | 11501208  |
| chr10 | 11481769  | 11518574  |
| chr10 | 11481769  | 11527567  |
| chr10 | 114830851 | 114836246 |
| chr10 | 114830851 | 114847233 |
| chr10 | 114830851 | 114848737 |
| chr10 | 114843740 | 114848737 |
| chr10 | 114951093 | 114974385 |
| chr10 | 114959725 | 114974385 |
| chr10 | 114970367 | 114974385 |
| chr10 | 11501100  | 11527567  |
| chr10 | 11509594  | 11527567  |
| chr10 | 115120184 | 115129535 |
| chr10 | 115120184 | 115165645 |
| chr10 | 115120184 | 115171292 |
| chr10 | 115120184 | 115241725 |
| chr10 | 11518534  | 11527567  |
| chr10 | 11518534  | 11597717  |
| chr10 | 11525385  | 11597717  |
| chr10 | 115268325 | 115286397 |
| chr10 | 115426249 | 115469329 |
| chr10 | 115461940 | 115469329 |
| chr10 | 115461940 | 115519324 |

|       |           |           |
|-------|-----------|-----------|
| chr10 | 116681151 | 116681877 |
| chr10 | 116901764 | 116915484 |
| chr10 | 116901764 | 116921516 |
| chr10 | 116901764 | 116927891 |
| chr10 | 117318871 | 117341102 |
| chr10 | 11747348  | 11755608  |
| chr10 | 118038971 | 118040565 |
| chr10 | 118691264 | 118701408 |
| chr10 | 118695140 | 118730410 |
| chr10 | 118701305 | 118730410 |
| chr10 | 118729294 | 118730410 |
| chr10 | 119041993 | 119044142 |
| chr10 | 119051198 | 119059397 |
| chr10 | 119051198 | 119059718 |
| chr10 | 119056739 | 119059718 |
| chr10 | 119059211 | 119061328 |
| chr10 | 119059211 | 119065570 |
| chr10 | 119065398 | 119073937 |
| chr10 | 119069445 | 119071085 |
| chr10 | 119069445 | 119073937 |
| chr10 | 119070885 | 119073937 |
| chr10 | 119072889 | 119073577 |
| chr10 | 119072889 | 119073937 |
| chr10 | 119073440 | 119073937 |
| chr10 | 119107947 | 119117667 |
| chr10 | 119107947 | 119120452 |
| chr10 | 119146235 | 119156756 |
| chr10 | 119146235 | 119164196 |
| chr10 | 119155061 | 119160969 |
| chr10 | 11929864  | 11943168  |
| chr10 | 11936544  | 11952249  |
| chr10 | 11942664  | 11952249  |
| chr10 | 11948368  | 11952249  |
| chr10 | 119515508 | 119527424 |
| chr10 | 119526031 | 119527424 |
| chr10 | 119576610 | 119580010 |
| chr10 | 119576610 | 119588248 |
| chr10 | 119577079 | 119580010 |
| chr10 | 119577079 | 119582223 |
| chr10 | 119578725 | 119588248 |
| chr10 | 11964008  | 12014184  |
| chr10 | 11967340  | 12014184  |
| chr10 | 11979056  | 12004727  |
| chr10 | 11979056  | 12014184  |
| chr10 | 119796714 | 119811955 |

|       |           |           |
|-------|-----------|-----------|
| chr10 | 119804172 | 119811955 |
| chr10 | 119836895 | 119849576 |
| chr10 | 119838534 | 119842595 |
| chr10 | 119843253 | 119849576 |
| chr10 | 119847612 | 119853172 |
| chr10 | 119902798 | 119904277 |
| chr10 | 119904083 | 119909130 |
| chr10 | 119912043 | 119915889 |
| chr10 | 119914729 | 119926227 |
| chr10 | 119926035 | 119932318 |
| chr10 | 119930328 | 119933787 |
| chr10 | 11997671  | 12004727  |
| chr10 | 11997671  | 12014184  |
| chr10 | 11997671  | 12035441  |
| chr10 | 12028744  | 12035441  |
| chr10 | 12081471  | 12084751  |
| chr10 | 12081471  | 12087729  |
| chr10 | 12081471  | 12091684  |
| chr10 | 12081471  | 12094271  |
| chr10 | 12081471  | 12101181  |
| chr10 | 12081471  | 12108015  |
| chr10 | 12081471  | 12113064  |
| chr10 | 12081471  | 12120267  |
| chr10 | 120858642 | 120871346 |
| chr10 | 120878352 | 120904142 |
| chr10 | 120880825 | 120890009 |
| chr10 | 12088985  | 12094271  |
| chr10 | 120900028 | 120904142 |
| chr10 | 12094072  | 12097996  |
| chr10 | 12100177  | 12101181  |
| chr10 | 12112899  | 12120267  |
| chr10 | 12117672  | 12120267  |
| chr10 | 12118748  | 12120267  |
| chr10 | 121538591 | 121565704 |
| chr10 | 121551289 | 121565704 |
| chr10 | 121564501 | 121565704 |
| chr10 | 12157907  | 12161121  |
| chr10 | 12177792  | 12186332  |
| chr10 | 121790168 | 121870038 |
| chr10 | 121836717 | 121870038 |
| chr10 | 121898840 | 121924329 |
| chr10 | 121902390 | 121911151 |
| chr10 | 121902390 | 121922411 |
| chr10 | 121902390 | 121924329 |
| chr10 | 121910905 | 121913893 |

|       |           |           |
|-------|-----------|-----------|
| chr10 | 121910905 | 121924329 |
| chr10 | 121913789 | 121924329 |
| chr10 | 121959323 | 121961517 |
| chr10 | 121959323 | 121963328 |
| chr10 | 121960357 | 121974081 |
| chr10 | 121963237 | 121965385 |
| chr10 | 121965285 | 121974081 |
| chr10 | 12209966  | 12217467  |
| chr10 | 12209966  | 12238485  |
| chr10 | 122132608 | 122143706 |
| chr10 | 12215739  | 12238485  |
| chr10 | 12217360  | 12238485  |
| chr10 | 12230947  | 12238485  |
| chr10 | 12235047  | 12238485  |
| chr10 | 12235047  | 12246277  |
| chr10 | 122392302 | 122406673 |
| chr10 | 122392302 | 122413045 |
| chr10 | 122392302 | 122416002 |
| chr10 | 122392302 | 122417968 |
| chr10 | 122392302 | 122424959 |
| chr10 | 122392302 | 122427031 |
| chr10 | 122393180 | 122417968 |
| chr10 | 122400342 | 122416002 |
| chr10 | 122412919 | 122417968 |
| chr10 | 122412919 | 122424959 |
| chr10 | 122488901 | 122489626 |
| chr10 | 122937704 | 122953032 |
| chr10 | 122948648 | 122953032 |
| chr10 | 122951953 | 122953032 |
| chr10 | 122995993 | 123007176 |
| chr10 | 124012332 | 124046724 |
| chr10 | 124021255 | 124046724 |
| chr10 | 124038514 | 124044919 |
| chr10 | 124038514 | 124046724 |
| chr10 | 124405435 | 124412200 |
| chr10 | 124408541 | 124408965 |
| chr10 | 124408541 | 124412200 |
| chr10 | 124484138 | 124488575 |
| chr10 | 124484138 | 124498128 |
| chr10 | 124496960 | 124517271 |
| chr10 | 124681606 | 124696212 |
| chr10 | 124681606 | 124706887 |
| chr10 | 124696157 | 124706887 |
| chr10 | 124774674 | 124790338 |
| chr10 | 124806830 | 124826785 |

|       |           |           |
|-------|-----------|-----------|
| chr10 | 124806830 | 124831463 |
| chr10 | 124816575 | 124831463 |
| chr10 | 124828755 | 124831463 |
| chr10 | 124966593 | 124974398 |
| chr10 | 125038996 | 125111093 |
| chr10 | 125038996 | 125133612 |
| chr10 | 125729002 | 125741201 |
| chr10 | 125747535 | 125749565 |
| chr10 | 125749411 | 125753845 |
| chr10 | 125752798 | 125753845 |
| chr10 | 125807412 | 125816525 |
| chr10 | 125812213 | 125816525 |
| chr10 | 125827557 | 125831607 |
| chr10 | 12666735  | 12769799  |
| chr10 | 126970701 | 126981973 |
| chr10 | 126970701 | 126987617 |
| chr10 | 126970701 | 126990603 |
| chr10 | 126970701 | 127000307 |
| chr10 | 126970701 | 127008804 |
| chr10 | 126970701 | 127012374 |
| chr10 | 126970701 | 127018835 |
| chr10 | 126970701 | 127023324 |
| chr10 | 126970701 | 127037816 |
| chr10 | 126970701 | 127127764 |
| chr10 | 126977947 | 127000307 |
| chr10 | 126996747 | 127000307 |
| chr10 | 127008731 | 127012374 |
| chr10 | 127008731 | 127018835 |
| chr10 | 127008731 | 127023324 |
| chr10 | 127008731 | 127127764 |
| chr10 | 127012294 | 127061776 |
| chr10 | 127018709 | 127026424 |
| chr10 | 127018709 | 127032320 |
| chr10 | 127018709 | 127037816 |
| chr10 | 127018709 | 127061776 |
| chr10 | 127023199 | 127026424 |
| chr10 | 127023199 | 127032320 |
| chr10 | 127031649 | 127037816 |
| chr10 | 127031649 | 127043164 |
| chr10 | 127031649 | 127052815 |
| chr10 | 127037718 | 127127764 |
| chr10 | 127042624 | 127061776 |
| chr10 | 127052680 | 127061776 |
| chr10 | 127061667 | 127110354 |
| chr10 | 127061667 | 127127764 |



|       |           |           |
|-------|-----------|-----------|
| chr10 | 127061667 | 127257429 |
| chr10 | 127106230 | 127127764 |
| chr10 | 127125473 | 127127764 |
| chr10 | 12760947  | 12769799  |
| chr10 | 12791157  | 12816328  |
| chr10 | 128040874 | 128056213 |
| chr10 | 128073336 | 128079695 |
| chr10 | 130145210 | 130160997 |
| chr10 | 130145210 | 130166679 |
| chr10 | 130145210 | 130166980 |
| chr10 | 130145210 | 130175089 |
| chr10 | 130159994 | 130166980 |
| chr10 | 130159994 | 130175089 |
| chr10 | 130166506 | 130169490 |
| chr10 | 130166506 | 130171636 |
| chr10 | 130169432 | 130175089 |
| chr10 | 13108137  | 13109288  |
| chr10 | 13108961  | 13109288  |
| chr10 | 13110273  | 13122487  |
| chr10 | 13123994  | 13133581  |
| chr10 | 13127744  | 13133581  |
| chr10 | 13164127  | 13171263  |
| chr10 | 13164127  | 13175681  |
| chr10 | 13172375  | 13172765  |
| chr10 | 13172375  | 13175681  |
| chr10 | 13172375  | 13183100  |
| chr10 | 13172375  | 13186280  |
| chr10 | 13172375  | 13189080  |
| chr10 | 13175509  | 13183100  |
| chr10 | 13180441  | 13192568  |
| chr10 | 13182932  | 13192568  |
| chr10 | 13182932  | 13195269  |
| chr10 | 13188880  | 13192568  |
| chr10 | 13188880  | 13201534  |
| chr10 | 13191298  | 13192568  |
| chr10 | 13191298  | 13195269  |
| chr10 | 131934457 | 131947791 |
| chr10 | 131940030 | 131945459 |
| chr10 | 131940030 | 131947791 |
| chr10 | 131970637 | 131973943 |
| chr10 | 131970863 | 131973943 |
| chr10 | 131973033 | 131973943 |
| chr10 | 13197622  | 13198807  |
| chr10 | 13197622  | 13201534  |
| chr10 | 132222640 | 132228128 |

|       |           |           |
|-------|-----------|-----------|
| chr10 | 132337564 | 132344650 |
| chr10 | 132607914 | 132650505 |
| chr10 | 132607914 | 132697919 |
| chr10 | 132645867 | 132650505 |
| chr10 | 132690391 | 132697919 |
| chr10 | 132690391 | 132710456 |
| chr10 | 132690391 | 132726905 |
| chr10 | 132708312 | 132726905 |
| chr10 | 132708312 | 132749845 |
| chr10 | 13280975  | 13283839  |
| chr10 | 13280975  | 13288541  |
| chr10 | 13280975  | 13295606  |
| chr10 | 13280975  | 13298245  |
| chr10 | 13283689  | 13298245  |
| chr10 | 13291830  | 13295606  |
| chr10 | 13291830  | 13298245  |
| chr10 | 13294427  | 13295606  |
| chr10 | 13322834  | 13345028  |
| chr10 | 13328350  | 13345028  |
| chr10 | 133297951 | 133302980 |
| chr10 | 13333816  | 13336350  |
| chr10 | 13333816  | 13345028  |
| chr10 | 133379998 | 133384212 |
| chr10 | 133395712 | 133402773 |
| chr10 | 133395712 | 133419592 |
| chr10 | 133401528 | 133402773 |
| chr10 | 13496765  | 13500080  |
| chr10 | 13597457  | 13616553  |
| chr10 | 13605630  | 13611683  |
| chr10 | 13605630  | 13616553  |
| chr10 | 13663452  | 13666325  |
| chr10 | 13663452  | 13675044  |
| chr10 | 13737843  | 13747819  |
| chr10 | 14848608  | 14855943  |
| chr10 | 14851218  | 14867909  |
| chr10 | 14867082  | 14867909  |
| chr10 | 14881499  | 14897517  |
| chr10 | 14919737  | 14935564  |
| chr10 | 14922980  | 14935564  |
| chr10 | 14926842  | 14935564  |
| chr10 | 14928015  | 14935564  |
| chr10 | 14934379  | 14934775  |
| chr10 | 14945104  | 14945565  |
| chr10 | 15109701  | 15119513  |
| chr10 | 15109701  | 15128458  |

|       |          |          |
|-------|----------|----------|
| chr10 | 15109701 | 15130312 |
| chr10 | 15119342 | 15141557 |
| chr10 | 15128349 | 15130312 |
| chr10 | 15128349 | 15135418 |
| chr10 | 15128349 | 15141557 |
| chr10 | 15140986 | 15141557 |
| chr10 | 15248638 | 15254879 |
| chr10 | 15248638 | 15284105 |
| chr10 | 15254720 | 15284105 |
| chr10 | 15275854 | 15284105 |
| chr10 | 15796099 | 15847943 |
| chr10 | 15816834 | 15834616 |
| chr10 | 15816834 | 15838279 |
| chr10 | 15816834 | 15843272 |
| chr10 | 15816834 | 15847943 |
| chr10 | 15821655 | 15834616 |
| chr10 | 15821655 | 15843272 |
| chr10 | 15821655 | 15847943 |
| chr10 | 15833629 | 15843272 |
| chr10 | 15833629 | 15847943 |
| chr10 | 15837203 | 15847943 |
| chr10 | 16467131 | 16505160 |
| chr10 | 16484336 | 16486617 |
| chr10 | 16695022 | 16754989 |
| chr10 | 16752538 | 16754989 |
| chr10 | 16752538 | 16764510 |
| chr10 | 16752538 | 16782084 |
| chr10 | 17157440 | 17168917 |
| chr10 | 17603559 | 17604047 |
| chr10 | 17693221 | 17696869 |
| chr10 | 17700190 | 17705741 |
| chr10 | 17704430 | 17705741 |
| chr10 | 17705587 | 17708951 |
| chr10 | 179993   | 210048   |
| chr10 | 179993   | 221356   |
| chr10 | 179993   | 240111   |
| chr10 | 18585948 | 18596327 |
| chr10 | 18585948 | 18616293 |
| chr10 | 18596207 | 18616293 |
| chr10 | 18609844 | 18616293 |
| chr10 | 18609844 | 18648645 |
| chr10 | 18642475 | 18648645 |
| chr10 | 18666574 | 18668677 |
| chr10 | 21534644 | 21538912 |
| chr10 | 21586293 | 21617207 |

|       |          |          |
|-------|----------|----------|
| chr10 | 21612347 | 21651768 |
| chr10 | 21614830 | 21670704 |
| chr10 | 21670448 | 21682257 |
| chr10 | 21688490 | 21727928 |
| chr10 | 21713771 | 21727928 |
| chr10 | 21713771 | 21735235 |
| chr10 | 21805979 | 21882439 |
| chr10 | 21805979 | 21929141 |
| chr10 | 21882281 | 21920963 |
| chr10 | 21904521 | 21920963 |
| chr10 | 21904521 | 21929141 |
| chr10 | 21918778 | 21920963 |
| chr10 | 21918778 | 21929141 |
| chr10 | 22317883 | 22319018 |
| chr10 | 22326430 | 22328698 |
| chr10 | 22326430 | 22329128 |
| chr10 | 22550658 | 22573457 |
| chr10 | 22550658 | 22591781 |
| chr10 | 22567850 | 22591781 |
| chr10 | 22567850 | 22609717 |
| chr10 | 22591628 | 22608023 |
| chr10 | 22591628 | 22609717 |
| chr10 | 22607926 | 22609717 |
| chr10 | 24591886 | 24595039 |
| chr10 | 24619472 | 24630050 |
| chr10 | 24619472 | 24722279 |
| chr10 | 24629995 | 24635103 |
| chr10 | 24629995 | 24670397 |
| chr10 | 24666984 | 24670397 |
| chr10 | 26702161 | 26709768 |
| chr10 | 26704676 | 26705394 |
| chr10 | 26704676 | 26709768 |
| chr10 | 26705285 | 26709768 |
| chr10 | 26705285 | 26720359 |
| chr10 | 26720217 | 26724123 |
| chr10 | 26765217 | 26770345 |
| chr10 | 26765217 | 26771089 |
| chr10 | 26934412 | 26935627 |
| chr10 | 27006916 | 27017792 |
| chr10 | 27012881 | 27014711 |
| chr10 | 27014493 | 27017792 |
| chr10 | 27039964 | 27043567 |
| chr10 | 27067156 | 27086609 |
| chr10 | 27077337 | 27086609 |
| chr10 | 27082802 | 27093799 |

|       |          |          |
|-------|----------|----------|
| chr10 | 27092405 | 27093799 |
| chr10 | 27093348 | 27093799 |
| chr10 | 27114520 | 27117727 |
| chr10 | 27114520 | 27121448 |
| chr10 | 27114520 | 27136385 |
| chr10 | 27117575 | 27121448 |
| chr10 | 27119293 | 27121448 |
| chr10 | 27119293 | 27126786 |
| chr10 | 27121385 | 27123699 |
| chr10 | 27122840 | 27123699 |
| chr10 | 27122840 | 27126786 |
| chr10 | 27122840 | 27131941 |
| chr10 | 27131858 | 27136385 |
| chr10 | 27134038 | 27136385 |
| chr10 | 27134830 | 27136385 |
| chr10 | 27136275 | 27145590 |
| chr10 | 27142386 | 27145590 |
| chr10 | 27158548 | 27159758 |
| chr10 | 27158548 | 27161182 |
| chr10 | 27158548 | 27165539 |
| chr10 | 27165063 | 27165539 |
| chr10 | 27167101 | 27171083 |
| chr10 | 27169943 | 27173259 |
| chr10 | 27169943 | 27181581 |
| chr10 | 27173117 | 27181581 |
| chr10 | 27173120 | 27181581 |
| chr10 | 27205197 | 27215641 |
| chr10 | 27208245 | 27211081 |
| chr10 | 27215534 | 27219857 |
| chr10 | 27215534 | 27231820 |
| chr10 | 27526827 | 27533994 |
| chr10 | 27532506 | 27533994 |
| chr10 | 27907662 | 27944962 |
| chr10 | 27935009 | 27936880 |
| chr10 | 27935009 | 27944962 |
| chr10 | 27981465 | 27983979 |
| chr10 | 27981465 | 27985211 |
| chr10 | 27981465 | 27987543 |
| chr10 | 27981465 | 27995180 |
| chr10 | 28535561 | 28583505 |
| chr10 | 28535561 | 28589851 |
| chr10 | 28535561 | 28590832 |
| chr10 | 28535561 | 28596041 |
| chr10 | 28583398 | 28590832 |
| chr10 | 28583398 | 28596041 |

|       |          |          |
|-------|----------|----------|
| chr10 | 28583398 | 28608431 |
| chr10 | 28589735 | 28596041 |
| chr10 | 28589735 | 28608431 |
| chr10 | 28595732 | 28608431 |
| chr10 | 28608185 | 28614685 |
| chr10 | 30322390 | 30326635 |
| chr10 | 30322390 | 30341640 |
| chr10 | 30326423 | 30341640 |
| chr10 | 30336802 | 30341640 |
| chr10 | 30340225 | 30341640 |
| chr10 | 30450257 | 30451744 |
| chr10 | 30451637 | 30459501 |
| chr10 | 30876997 | 30910440 |
| chr10 | 30876997 | 30941651 |
| chr10 | 30908932 | 30984426 |
| chr10 | 310030   | 349454   |
| chr10 | 3101364  | 3109480  |
| chr10 | 3112221  | 3116846  |
| chr10 | 3116775  | 3120044  |
| chr10 | 3116775  | 3134582  |
| chr10 | 3118781  | 3120044  |
| chr10 | 3119891  | 3133314  |
| chr10 | 3132379  | 3133314  |
| chr10 | 3132379  | 3135838  |
| chr10 | 3144291  | 3147737  |
| chr10 | 31461036 | 31495838 |
| chr10 | 31461036 | 31502509 |
| chr10 | 31461036 | 31514708 |
| chr10 | 31495775 | 31502509 |
| chr10 | 3158039  | 3160330  |
| chr10 | 3158913  | 3160330  |
| chr10 | 3160203  | 3170206  |
| chr10 | 3163724  | 3167042  |
| chr10 | 3163724  | 3170206  |
| chr10 | 31817787 | 31831800 |
| chr10 | 31820386 | 31843586 |
| chr10 | 31820386 | 31852597 |
| chr10 | 31820386 | 31854206 |
| chr10 | 31820386 | 31861658 |
| chr10 | 31826303 | 31861658 |
| chr10 | 31831738 | 31852597 |
| chr10 | 31839636 | 31852597 |
| chr10 | 31843460 | 31854206 |
| chr10 | 31843460 | 31861658 |
| chr10 | 31852516 | 31854206 |

|       |          |          |
|-------|----------|----------|
| chr10 | 31852516 | 31861658 |
| chr10 | 31861394 | 31910563 |
| chr10 | 32017142 | 32018562 |
| chr10 | 32017142 | 32019959 |
| chr10 | 32019857 | 32021287 |
| chr10 | 32021021 | 32021287 |
| chr10 | 32022139 | 32023036 |
| chr10 | 32028427 | 32037607 |
| chr10 | 32034689 | 32037378 |
| chr10 | 32034689 | 32037607 |
| chr10 | 32037253 | 32037607 |
| chr10 | 32037253 | 32040457 |
| chr10 | 32038162 | 32040457 |
| chr10 | 32038162 | 32048551 |
| chr10 | 32273162 | 32291322 |
| chr10 | 32284697 | 32293737 |
| chr10 | 32451591 | 32462703 |
| chr10 | 32451591 | 32474023 |
| chr10 | 32451591 | 32565620 |
| chr10 | 32471063 | 32474023 |
| chr10 | 32472480 | 32518505 |
| chr10 | 32472480 | 32567891 |
| chr10 | 32517944 | 32571893 |
| chr10 | 32543299 | 32567891 |
| chr10 | 32583033 | 32584304 |
| chr10 | 32583033 | 32686080 |
| chr10 | 327005   | 345110   |
| chr10 | 327005   | 349454   |
| chr10 | 32711619 | 32729457 |
| chr10 | 32908367 | 32910455 |
| chr10 | 32908367 | 32935558 |
| chr10 | 32919884 | 32935558 |
| chr10 | 32920244 | 32930044 |
| chr10 | 32920244 | 32935558 |
| chr10 | 32923584 | 32926109 |
| chr10 | 33226133 | 33270856 |
| chr10 | 34119612 | 34131583 |
| chr10 | 341198   | 345110   |
| chr10 | 341198   | 349454   |
| chr10 | 34131462 | 34269899 |
| chr10 | 34131462 | 34284245 |
| chr10 | 34269656 | 34284245 |
| chr10 | 34269656 | 34341816 |
| chr10 | 34317106 | 34341816 |
| chr10 | 34331116 | 34341816 |

|       |          |          |
|-------|----------|----------|
| chr10 | 34331116 | 34360259 |
| chr10 | 34347964 | 34360259 |
| chr10 | 34359146 | 34360259 |
| chr10 | 34359146 | 34384254 |
| chr10 | 34359146 | 34399413 |
| chr10 | 34359146 | 34401917 |
| chr10 | 34372497 | 34384254 |
| chr10 | 34374873 | 34384254 |
| chr10 | 34377966 | 34384254 |
| chr10 | 34399329 | 34401917 |
| chr10 | 34399329 | 34450448 |
| chr10 | 34450316 | 34470263 |
| chr10 | 34450316 | 34517159 |
| chr10 | 34450316 | 34696419 |
| chr10 | 34470084 | 34517159 |
| chr10 | 34470084 | 34696419 |
| chr10 | 34516978 | 34696419 |
| chr10 | 35011847 | 35028887 |
| chr10 | 35013698 | 35028887 |
| chr10 | 35013698 | 35029640 |
| chr10 | 35013698 | 35031619 |
| chr10 | 35013698 | 35033273 |
| chr10 | 35016191 | 35031619 |
| chr10 | 35025131 | 35029640 |
| chr10 | 35028809 | 35033273 |
| chr10 | 35029487 | 35031386 |
| chr10 | 35029487 | 35033273 |
| chr10 | 35029487 | 35049765 |
| chr10 | 35032434 | 35039082 |
| chr10 | 35032434 | 35049765 |
| chr10 | 35044565 | 35054539 |
| chr10 | 35044565 | 35071339 |
| chr10 | 35054433 | 35063062 |
| chr10 | 35054433 | 35071339 |
| chr10 | 35060873 | 35071339 |
| chr10 | 35148367 | 35179276 |
| chr10 | 35178888 | 35188388 |
| chr10 | 35178888 | 35207051 |
| chr10 | 35188199 | 35207051 |
| chr10 | 35483403 | 35516623 |
| chr10 | 35483403 | 35530243 |
| chr10 | 35483403 | 35553185 |
| chr10 | 35501500 | 35530243 |
| chr10 | 35516522 | 35530243 |
| chr10 | 35525963 | 35530243 |



|       |          |          |
|-------|----------|----------|
| chr10 | 35525963 | 35553185 |
| chr10 | 35529972 | 35566185 |
| chr10 | 366274   | 384146   |
| chr10 | 37833024 | 37856337 |
| chr10 | 37833024 | 37856532 |
| chr10 | 37837616 | 37838111 |
| chr10 | 38012297 | 38017386 |
| chr10 | 38016870 | 38017386 |
| chr10 | 382646   | 390863   |
| chr10 | 384026   | 409017   |
| chr10 | 408925   | 415888   |
| chr10 | 408925   | 423033   |
| chr10 | 408925   | 440996   |
| chr10 | 408925   | 472549   |
| chr10 | 413912   | 423033   |
| chr10 | 419064   | 423033   |
| chr10 | 419064   | 472549   |
| chr10 | 419064   | 486530   |
| chr10 | 422823   | 486530   |
| chr10 | 42614281 | 42636972 |
| chr10 | 42631928 | 42632439 |
| chr10 | 42631928 | 42636972 |
| chr10 | 42787167 | 42790511 |
| chr10 | 42796473 | 42802218 |
| chr10 | 42797421 | 42802218 |
| chr10 | 42816598 | 42817494 |
| chr10 | 42816598 | 42823784 |
| chr10 | 43154896 | 43160595 |
| chr10 | 43158714 | 43167098 |
| chr10 | 43158714 | 43176032 |
| chr10 | 440870   | 486530   |
| chr10 | 45625950 | 45639963 |
| chr10 | 45639815 | 45653059 |
| chr10 | 45639815 | 45663842 |
| chr10 | 45648293 | 45663842 |
| chr10 | 45651965 | 45663842 |
| chr10 | 45662579 | 45663842 |
| chr10 | 45728861 | 45746647 |
| chr10 | 45752587 | 45753237 |
| chr10 | 45862985 | 45900426 |
| chr10 | 45888164 | 45910706 |
| chr10 | 45888164 | 45916171 |
| chr10 | 45888164 | 45939447 |
| chr10 | 45888164 | 45946911 |
| chr10 | 45888164 | 45962994 |

|       |          |          |
|-------|----------|----------|
| chr10 | 45900346 | 45916171 |
| chr10 | 45939360 | 45962994 |
| chr10 | 45946836 | 45962994 |
| chr10 | 45975453 | 45988847 |
| chr10 | 45982522 | 45988847 |
| chr10 | 46010222 | 46013639 |
| chr10 | 46014443 | 46016694 |
| chr10 | 472438   | 486530   |
| chr10 | 47542166 | 47544529 |
| chr10 | 4830674  | 4835809  |
| chr10 | 4830674  | 4842504  |
| chr10 | 4830674  | 4847299  |
| chr10 | 48401611 | 48404981 |
| chr10 | 48401611 | 48410168 |
| chr10 | 48420154 | 48431270 |
| chr10 | 48555462 | 48583152 |
| chr10 | 49482686 | 49506012 |
| chr10 | 49493116 | 49506012 |
| chr10 | 49500537 | 49506012 |
| chr10 | 49832802 | 49843632 |
| chr10 | 49832802 | 49857453 |
| chr10 | 49832802 | 49861663 |
| chr10 | 49832802 | 49865381 |
| chr10 | 49832802 | 49869555 |
| chr10 | 49832802 | 49879830 |
| chr10 | 49841949 | 49861663 |
| chr10 | 49841949 | 49869555 |
| chr10 | 49857305 | 49861663 |
| chr10 | 49879672 | 49935142 |
| chr10 | 49915916 | 49932283 |
| chr10 | 49915916 | 49934163 |
| chr10 | 49915916 | 49935142 |
| chr10 | 49922335 | 49935142 |
| chr10 | 49943234 | 49955060 |
| chr10 | 49943234 | 49958480 |
| chr10 | 49952125 | 49952533 |
| chr10 | 49952125 | 49955060 |
| chr10 | 49952125 | 49958480 |
| chr10 | 49989307 | 49994429 |
| chr10 | 50001995 | 50008076 |
| chr10 | 50069546 | 50084165 |
| chr10 | 50090775 | 50093917 |
| chr10 | 50104041 | 50113997 |
| chr10 | 50327204 | 50344345 |
| chr10 | 50433475 | 50466932 |

|       |          |          |
|-------|----------|----------|
| chr10 | 50433475 | 50519921 |
| chr10 | 50433475 | 50590247 |
| chr10 | 50460672 | 50466932 |
| chr10 | 50460672 | 50590247 |
| chr10 | 50466889 | 50590247 |
| chr10 | 50519830 | 50590247 |
| chr10 | 5452357  | 5453346  |
| chr10 | 56359475 | 56360383 |
| chr10 | 5717658  | 5720970  |
| chr10 | 5720543  | 5727123  |
| chr10 | 5726884  | 5731203  |
| chr10 | 5726884  | 5735546  |
| chr10 | 5730486  | 5735546  |
| chr10 | 5730486  | 5742526  |
| chr10 | 5766493  | 5800705  |
| chr10 | 5768212  | 5773941  |
| chr10 | 5768212  | 5800705  |
| chr10 | 5773841  | 5786050  |
| chr10 | 5773841  | 5800705  |
| chr10 | 5785141  | 5800705  |
| chr10 | 5785851  | 5800705  |
| chr10 | 5794884  | 5796862  |
| chr10 | 5794884  | 5800705  |
| chr10 | 5796762  | 5800705  |
| chr10 | 58216144 | 58237814 |
| chr10 | 58361337 | 58368016 |
| chr10 | 58388189 | 58390860 |
| chr10 | 5880297  | 5883167  |
| chr10 | 5883005  | 5885765  |
| chr10 | 5903019  | 5911128  |
| chr10 | 5903019  | 5927541  |
| chr10 | 5956378  | 5960567  |
| chr10 | 5959753  | 5960567  |
| chr10 | 5959753  | 5966339  |
| chr10 | 59804419 | 59814755 |
| chr10 | 59812634 | 59852702 |
| chr10 | 59832524 | 59852702 |
| chr10 | 60780140 | 60785787 |
| chr10 | 60784704 | 60792289 |
| chr10 | 6097047  | 6101387  |
| chr10 | 6097047  | 6112361  |
| chr10 | 6101270  | 6106238  |
| chr10 | 6213622  | 6217191  |
| chr10 | 63176296 | 63197563 |
| chr10 | 63185562 | 63191108 |

|       |          |          |
|-------|----------|----------|
| chr10 | 63190893 | 63194375 |
| chr10 | 63192937 | 63194375 |
| chr10 | 63193344 | 63197563 |
| chr10 | 63217206 | 63219983 |
| chr10 | 63610186 | 63619800 |
| chr10 | 65571424 | 65615761 |
| chr10 | 67887416 | 67889123 |
| chr10 | 67887416 | 67891554 |
| chr10 | 67887416 | 67906937 |
| chr10 | 67888881 | 67891554 |
| chr10 | 67891401 | 67909442 |
| chr10 | 67932596 | 67936235 |
| chr10 | 67932596 | 67941105 |
| chr10 | 67932596 | 67955130 |
| chr10 | 67932596 | 67956976 |
| chr10 | 67932596 | 67992682 |
| chr10 | 67932596 | 68038169 |
| chr10 | 67939587 | 67941105 |
| chr10 | 67954594 | 67956976 |
| chr10 | 67954594 | 67966802 |
| chr10 | 67954594 | 67988835 |
| chr10 | 67954594 | 68014186 |
| chr10 | 67954594 | 68034186 |
| chr10 | 67954594 | 68044563 |
| chr10 | 67956877 | 68044563 |
| chr10 | 67966682 | 67992682 |
| chr10 | 67966682 | 68014186 |
| chr10 | 67966682 | 68025676 |
| chr10 | 67966682 | 68038169 |
| chr10 | 67988662 | 67991199 |
| chr10 | 67988662 | 68014186 |
| chr10 | 67988662 | 68044563 |
| chr10 | 67988662 | 68073686 |
| chr10 | 67990210 | 68014186 |
| chr10 | 67990903 | 68014186 |
| chr10 | 67990903 | 68044563 |
| chr10 | 67992198 | 68014186 |
| chr10 | 68014025 | 68044563 |
| chr10 | 68014025 | 68073186 |
| chr10 | 68014025 | 68073686 |
| chr10 | 68025545 | 68038169 |
| chr10 | 68025545 | 68044563 |
| chr10 | 68025545 | 68073686 |
| chr10 | 68032777 | 68038169 |
| chr10 | 68032777 | 68073686 |

|       |          |          |
|-------|----------|----------|
| chr10 | 68033964 | 68073186 |
| chr10 | 68033964 | 68073686 |
| chr10 | 68038092 | 68044563 |
| chr10 | 68038092 | 68073686 |
| chr10 | 68044403 | 68073686 |
| chr10 | 68072882 | 68073686 |
| chr10 | 68109604 | 68122340 |
| chr10 | 68114232 | 68158627 |
| chr10 | 68121437 | 68158627 |
| chr10 | 68142939 | 68148467 |
| chr10 | 68142939 | 68150111 |
| chr10 | 68142939 | 68158627 |
| chr10 | 68142939 | 68161752 |
| chr10 | 68142939 | 68166666 |
| chr10 | 68142939 | 68174656 |
| chr10 | 68142939 | 68175461 |
| chr10 | 68142939 | 68189126 |
| chr10 | 68142939 | 68206903 |
| chr10 | 68145474 | 68158627 |
| chr10 | 68145474 | 68161752 |
| chr10 | 68150039 | 68158627 |
| chr10 | 68150039 | 68166666 |
| chr10 | 68165701 | 68189126 |
| chr10 | 68165701 | 68195532 |
| chr10 | 68174065 | 68175461 |
| chr10 | 68175322 | 68189126 |
| chr10 | 68175322 | 68195532 |
| chr10 | 68197351 | 68199575 |
| chr10 | 68288482 | 68289019 |
| chr10 | 68292009 | 68306903 |
| chr10 | 68296265 | 68306903 |
| chr10 | 68337198 | 68341309 |
| chr10 | 68337198 | 68341680 |
| chr10 | 68338502 | 68341680 |
| chr10 | 68341173 | 68341851 |
| chr10 | 68355352 | 68364113 |
| chr10 | 68355352 | 68386128 |
| chr10 | 68363589 | 68364113 |
| chr10 | 68381231 | 68393203 |
| chr10 | 68383797 | 68386128 |
| chr10 | 68383797 | 68401737 |
| chr10 | 68393137 | 68394451 |
| chr10 | 68393137 | 68396881 |
| chr10 | 68393137 | 68401737 |
| chr10 | 68393137 | 68404844 |

|       |          |          |
|-------|----------|----------|
| chr10 | 68394074 | 68394451 |
| chr10 | 68394074 | 68401737 |
| chr10 | 68394327 | 68401737 |
| chr10 | 68394327 | 68404844 |
| chr10 | 68422224 | 68422890 |
| chr10 | 68422514 | 68432315 |
| chr10 | 68430435 | 68432510 |
| chr10 | 68430435 | 68470163 |
| chr10 | 68431856 | 68437241 |
| chr10 | 68437010 | 68445083 |
| chr10 | 68437010 | 68446413 |
| chr10 | 68437010 | 68470163 |
| chr10 | 68442916 | 68445083 |
| chr10 | 68442916 | 68446413 |
| chr10 | 68450027 | 68468306 |
| chr10 | 68450027 | 68470163 |
| chr10 | 68459103 | 68465812 |
| chr10 | 68459103 | 68470163 |
| chr10 | 68459103 | 68471885 |
| chr10 | 68465666 | 68468306 |
| chr10 | 68465666 | 68470163 |
| chr10 | 68468122 | 68470163 |
| chr10 | 68487143 | 68488629 |
| chr10 | 68487143 | 68493570 |
| chr10 | 68487143 | 68503695 |
| chr10 | 68487143 | 68506718 |
| chr10 | 68487143 | 68516843 |
| chr10 | 68488466 | 68493570 |
| chr10 | 68493131 | 68493570 |
| chr10 | 68722454 | 68742569 |
| chr10 | 68722454 | 68749685 |
| chr10 | 68722454 | 68754077 |
| chr10 | 68722454 | 68757377 |
| chr10 | 68736875 | 68737889 |
| chr10 | 68736875 | 68742569 |
| chr10 | 68736875 | 68747566 |
| chr10 | 68737844 | 68742569 |
| chr10 | 68737844 | 68747566 |
| chr10 | 68740628 | 68742569 |
| chr10 | 68740628 | 68747566 |
| chr10 | 68742375 | 68749685 |
| chr10 | 68747160 | 68747566 |
| chr10 | 68747160 | 68755536 |
| chr10 | 68747373 | 68749685 |
| chr10 | 68753851 | 68757377 |

|       |          |          |
|-------|----------|----------|
| chr10 | 68753851 | 68766079 |
| chr10 | 68754713 | 68757377 |
| chr10 | 68757293 | 68766079 |
| chr10 | 68786135 | 68786692 |
| chr10 | 68786545 | 68789915 |
| chr10 | 68787926 | 68789915 |
| chr10 | 68881957 | 68892773 |
| chr10 | 68906710 | 68910382 |
| chr10 | 68906710 | 68911246 |
| chr10 | 68906710 | 68914204 |
| chr10 | 68906710 | 68919981 |
| chr10 | 68910306 | 68911246 |
| chr10 | 68910306 | 68914204 |
| chr10 | 68911067 | 68914204 |
| chr10 | 68911067 | 68919981 |
| chr10 | 68913161 | 68914204 |
| chr10 | 68913161 | 68919981 |
| chr10 | 68913161 | 68934918 |
| chr10 | 68934198 | 68936079 |
| chr10 | 68936935 | 68941194 |
| chr10 | 68936935 | 68943257 |
| chr10 | 68941059 | 68943257 |
| chr10 | 68959805 | 68962157 |
| chr10 | 68959805 | 68963469 |
| chr10 | 68959805 | 68965494 |
| chr10 | 68959805 | 68967203 |
| chr10 | 68963290 | 68967203 |
| chr10 | 68963290 | 68969121 |
| chr10 | 68963290 | 68970350 |
| chr10 | 68963290 | 68974743 |
| chr10 | 68965376 | 68967203 |
| chr10 | 68965376 | 68970350 |
| chr10 | 68967017 | 68969121 |
| chr10 | 68968975 | 68974743 |
| chr10 | 68970200 | 68977688 |
| chr10 | 68970200 | 68978976 |
| chr10 | 68973544 | 68974743 |
| chr10 | 68973544 | 68981581 |
| chr10 | 69000423 | 69011015 |
| chr10 | 69005045 | 69011015 |
| chr10 | 69155811 | 69158211 |
| chr10 | 69185986 | 69186550 |
| chr10 | 69185986 | 69187756 |
| chr10 | 69185986 | 69191766 |
| chr10 | 69189266 | 69197083 |

|       |          |          |
|-------|----------|----------|
| chr10 | 69195187 | 69203043 |
| chr10 | 69196991 | 69199197 |
| chr10 | 69198371 | 69203043 |
| chr10 | 69359896 | 69369624 |
| chr10 | 69364782 | 69369624 |
| chr10 | 69364782 | 69382791 |
| chr10 | 69376933 | 69380095 |
| chr10 | 69483690 | 69485215 |
| chr10 | 69483690 | 69495689 |
| chr10 | 69483690 | 69498396 |
| chr10 | 70153837 | 70161069 |
| chr10 | 70153837 | 70161931 |
| chr10 | 70204872 | 70209685 |
| chr10 | 70206263 | 70209685 |
| chr10 | 70209204 | 70218817 |
| chr10 | 70217811 | 70218817 |
| chr10 | 70844472 | 70851210 |
| chr10 | 70844472 | 70859499 |
| chr10 | 70844472 | 70868433 |
| chr10 | 70868344 | 70871986 |
| chr10 | 70885151 | 70885929 |
| chr10 | 71510081 | 71511212 |
| chr10 | 7188623  | 7220537  |
| chr10 | 72128081 | 72133181 |
| chr10 | 72128081 | 72152988 |
| chr10 | 72128081 | 72196989 |
| chr10 | 72128081 | 72213331 |
| chr10 | 72161537 | 72213331 |
| chr10 | 72196810 | 72203524 |
| chr10 | 72196810 | 72213331 |
| chr10 | 7220410  | 7227937  |
| chr10 | 7220410  | 7276989  |
| chr10 | 7220410  | 7285954  |
| chr10 | 7227854  | 7285954  |
| chr10 | 72340788 | 72341170 |
| chr10 | 72407928 | 72423371 |
| chr10 | 72407928 | 72477256 |
| chr10 | 7243557  | 7276989  |
| chr10 | 7243557  | 7285954  |
| chr10 | 72475099 | 72508269 |
| chr10 | 7248547  | 7285954  |
| chr10 | 72508154 | 72566794 |
| chr10 | 72562894 | 72566794 |
| chr10 | 72715110 | 72715902 |
| chr10 | 7276891  | 7285954  |



|       |          |          |
|-------|----------|----------|
| chr10 | 7283903  | 7285954  |
| chr10 | 72859176 | 72871580 |
| chr10 | 73010968 | 73074915 |
| chr10 | 73014223 | 73051249 |
| chr10 | 73030270 | 73047101 |
| chr10 | 73030270 | 73068983 |
| chr10 | 73030270 | 73074915 |
| chr10 | 73043886 | 73053590 |
| chr10 | 73068845 | 73074915 |
| chr10 | 73068845 | 73077813 |
| chr10 | 73072028 | 73074915 |
| chr10 | 73138002 | 73163950 |
| chr10 | 73146275 | 73152421 |
| chr10 | 73146275 | 73163950 |
| chr10 | 73152292 | 73160551 |
| chr10 | 73156274 | 73156655 |
| chr10 | 73156274 | 73163950 |
| chr10 | 73160433 | 73163950 |
| chr10 | 73174686 | 73210438 |
| chr10 | 73192555 | 73193593 |
| chr10 | 73192555 | 73210438 |
| chr10 | 73378910 | 73380201 |
| chr10 | 73396518 | 73398385 |
| chr10 | 73396518 | 73400857 |
| chr10 | 73398180 | 73400857 |
| chr10 | 73454411 | 73479517 |
| chr10 | 73470686 | 73471613 |
| chr10 | 73474918 | 73479517 |
| chr10 | 73478498 | 73479968 |
| chr10 | 73504849 | 73505426 |
| chr10 | 73516374 | 73519992 |
| chr10 | 73534599 | 73539593 |
| chr10 | 73536268 | 73539593 |
| chr10 | 73539443 | 73543131 |
| chr10 | 7367648  | 7370375  |
| chr10 | 7367648  | 7381949  |
| chr10 | 7370280  | 7381949  |
| chr10 | 73704985 | 73721504 |
| chr10 | 73713203 | 73721504 |
| chr10 | 73713203 | 73722577 |
| chr10 | 73718014 | 73722577 |
| chr10 | 73719159 | 73721504 |
| chr10 | 73725960 | 73728587 |
| chr10 | 73727292 | 73728587 |
| chr10 | 73746629 | 73747004 |

|       |          |          |
|-------|----------|----------|
| chr10 | 73800010 | 73800472 |
| chr10 | 73802673 | 73810903 |
| chr10 | 73802971 | 73803359 |
| chr10 | 73817022 | 73848082 |
| chr10 | 73819531 | 73824084 |
| chr10 | 74043082 | 74074903 |
| chr10 | 74070669 | 74072852 |
| chr10 | 74070669 | 74074903 |
| chr10 | 74070669 | 74083513 |
| chr10 | 74070669 | 74094461 |
| chr10 | 74070974 | 74074903 |
| chr10 | 74074742 | 74090198 |
| chr10 | 74089195 | 74094461 |
| chr10 | 74089195 | 74105353 |
| chr10 | 74097203 | 74101097 |
| chr10 | 74097203 | 74105353 |
| chr10 | 74107229 | 74109156 |
| chr10 | 74200763 | 74398579 |
| chr10 | 74314666 | 74398579 |
| chr10 | 74394140 | 74398579 |
| chr10 | 74394140 | 74525426 |
| chr10 | 74394140 | 74600493 |
| chr10 | 74525255 | 74600493 |
| chr10 | 74589281 | 74670269 |
| chr10 | 74600378 | 74670269 |
| chr10 | 74838682 | 74843478 |
| chr10 | 74838682 | 74960078 |
| chr10 | 74838682 | 74989112 |
| chr10 | 74969659 | 74985241 |
| chr10 | 74969659 | 74989112 |
| chr10 | 75150513 | 75164740 |
| chr10 | 75150513 | 75168658 |
| chr10 | 75150513 | 75176216 |
| chr10 | 75168540 | 75176216 |
| chr10 | 75219062 | 75220970 |
| chr10 | 75219062 | 75222402 |
| chr10 | 75882655 | 75883525 |
| chr10 | 76036007 | 76047303 |
| chr10 | 76036007 | 76058783 |
| chr10 | 76909965 | 76970067 |
| chr10 | 76944772 | 76970067 |
| chr10 | 76949141 | 76970067 |
| chr10 | 76969973 | 77019099 |
| chr10 | 77073096 | 77090510 |
| chr10 | 77084636 | 77090510 |

|       |          |          |
|-------|----------|----------|
| chr10 | 7759889  | 7766103  |
| chr10 | 7759889  | 7769345  |
| chr10 | 7778837  | 7780307  |
| chr10 | 77794007 | 77796594 |
| chr10 | 77794007 | 77812377 |
| chr10 | 7780055  | 7783175  |
| chr10 | 77824383 | 77830873 |
| chr10 | 77833913 | 77835922 |
| chr10 | 77853353 | 77854370 |
| chr10 | 77853353 | 77856892 |
| chr10 | 77853353 | 77869197 |
| chr10 | 7796120  | 7799194  |
| chr10 | 7796120  | 7800091  |
| chr10 | 7796120  | 7802854  |
| chr10 | 7797046  | 7802854  |
| chr10 | 77980140 | 77981559 |
| chr10 | 77982153 | 77984298 |
| chr10 | 7798989  | 7802854  |
| chr10 | 77991053 | 78007866 |
| chr10 | 77993196 | 78019265 |
| chr10 | 78002196 | 78004888 |
| chr10 | 78002196 | 78019265 |
| chr10 | 78002196 | 78022384 |
| chr10 | 78004715 | 78010540 |
| chr10 | 78007701 | 78010540 |
| chr10 | 78009536 | 78010540 |
| chr10 | 78035351 | 78035720 |
| chr10 | 78035351 | 78037304 |
| chr10 | 79118914 | 79162133 |
| chr10 | 7963919  | 7977323  |
| chr10 | 79804484 | 79814716 |
| chr10 | 80280172 | 80280792 |
| chr10 | 80280172 | 80284038 |
| chr10 | 80425865 | 80427496 |
| chr10 | 80507227 | 80509471 |
| chr10 | 825064   | 825870   |
| chr10 | 829384   | 845055   |
| chr10 | 836402   | 845055   |
| chr10 | 836402   | 864270   |
| chr10 | 836402   | 885760   |
| chr10 | 842931   | 885760   |
| chr10 | 84371013 | 84373815 |
| chr10 | 84371013 | 84425893 |
| chr10 | 84371013 | 84477664 |
| chr10 | 84417770 | 84425893 |

|       |          |          |
|-------|----------|----------|
| chr10 | 84417770 | 84438707 |
| chr10 | 84417770 | 84464016 |
| chr10 | 84417770 | 84477664 |
| chr10 | 84425730 | 84477664 |
| chr10 | 84438511 | 84477664 |
| chr10 | 84463932 | 84477664 |
| chr10 | 863742   | 864270   |
| chr10 | 863742   | 885760   |
| chr10 | 86443274 | 86446449 |
| chr10 | 86451966 | 86453831 |
| chr10 | 86451966 | 86461287 |
| chr10 | 86451966 | 86473973 |
| chr10 | 86458988 | 86473973 |
| chr10 | 86461175 | 86473973 |
| chr10 | 86467278 | 86473973 |
| chr10 | 86470991 | 86473973 |
| chr10 | 86472207 | 86473973 |
| chr10 | 86472207 | 86500743 |
| chr10 | 86838864 | 86876085 |
| chr10 | 86838864 | 86900126 |
| chr10 | 86875866 | 86892229 |
| chr10 | 86875866 | 86900126 |
| chr10 | 86875866 | 86917326 |
| chr10 | 86890061 | 86892229 |
| chr10 | 86890061 | 86900126 |
| chr10 | 86912239 | 86917326 |
| chr10 | 87053341 | 87062835 |
| chr10 | 87057690 | 87062835 |
| chr10 | 87057690 | 87068157 |
| chr10 | 87059149 | 87068157 |
| chr10 | 87060687 | 87062835 |
| chr10 | 87062655 | 87076656 |
| chr10 | 87068062 | 87076656 |
| chr10 | 87151349 | 87158155 |
| chr10 | 87170477 | 87170974 |
| chr10 | 87170477 | 87187200 |
| chr10 | 87508335 | 87521169 |
| chr10 | 87709195 | 87727489 |
| chr10 | 87756788 | 87776427 |
| chr10 | 87767672 | 87776427 |
| chr10 | 87767672 | 87784670 |
| chr10 | 87770951 | 87776427 |
| chr10 | 87776320 | 87814612 |
| chr10 | 87784469 | 87790430 |
| chr10 | 87784469 | 87814612 |

|       |          |          |
|-------|----------|----------|
| chr10 | 87925512 | 87933251 |
| chr10 | 87925512 | 87952259 |
| chr10 | 87925512 | 87961118 |
| chr10 | 87931045 | 87952259 |
| chr10 | 87942610 | 87952259 |
| chr10 | 884446   | 885760   |
| chr10 | 88901655 | 88905660 |
| chr10 | 88913100 | 88922436 |
| chr10 | 89714046 | 89717722 |
| chr10 | 89714046 | 89725158 |
| chr10 | 89714954 | 89717495 |
| chr10 | 89714954 | 89727896 |
| chr10 | 89716435 | 89725158 |
| chr10 | 89718709 | 89725158 |
| chr10 | 89718709 | 89726521 |
| chr10 | 89758705 | 89760636 |
| chr10 | 89758705 | 89768888 |
| chr10 | 90902242 | 90903276 |
| chr10 | 90917731 | 90918972 |
| chr10 | 91240483 | 91251440 |
| chr10 | 91240483 | 91264520 |
| chr10 | 91425280 | 91462184 |
| chr10 | 91812982 | 91820033 |
| chr10 | 91812982 | 91822362 |
| chr10 | 91827016 | 91842391 |
| chr10 | 91830922 | 91836998 |
| chr10 | 91830922 | 91848635 |
| chr10 | 91836918 | 91842391 |
| chr10 | 91840560 | 91842391 |
| chr10 | 91844918 | 91855126 |
| chr10 | 91849511 | 91851336 |
| chr10 | 91939951 | 91942568 |
| chr10 | 91942421 | 91956657 |
| chr10 | 91951402 | 91953873 |
| chr10 | 91951402 | 91956657 |
| chr10 | 91953736 | 91964201 |
| chr10 | 91980453 | 91984404 |
| chr10 | 91992118 | 91997751 |
| chr10 | 91992118 | 92008275 |
| chr10 | 91994534 | 91997751 |
| chr10 | 91994534 | 92008275 |
| chr10 | 91996368 | 91997751 |
| chr10 | 91996368 | 92008275 |
| chr10 | 92008122 | 92011415 |
| chr10 | 92008828 | 92011415 |

|       |          |          |
|-------|----------|----------|
| chr10 | 92016339 | 92018935 |
| chr10 | 92081319 | 92091944 |
| chr10 | 92111075 | 92192636 |
| chr10 | 92143028 | 92145112 |
| chr10 | 92143028 | 92181019 |
| chr10 | 92143028 | 92192636 |
| chr10 | 92483254 | 92508205 |
| chr10 | 92483254 | 92508890 |
| chr10 | 92483254 | 92537550 |
| chr10 | 92504793 | 92508205 |
| chr10 | 92504793 | 92537550 |
| chr10 | 92510049 | 92537550 |
| chr10 | 92531747 | 92534785 |
| chr10 | 92531747 | 92537550 |
| chr10 | 92534577 | 92537550 |
| chr10 | 92606264 | 92607237 |
| chr10 | 92606264 | 92609509 |
| chr10 | 92616736 | 92630364 |
| chr10 | 92628807 | 92630364 |
| chr10 | 92632485 | 92633795 |
| chr10 | 92637183 | 92639900 |
| chr10 | 92637183 | 92645642 |
| chr10 | 92639793 | 92645642 |
| chr10 | 92639793 | 92650517 |
| chr10 | 92648211 | 92649986 |
| chr10 | 92648211 | 92650517 |
| chr10 | 92649834 | 92650517 |
| chr10 | 92893348 | 92899644 |
| chr10 | 92893348 | 92909631 |
| chr10 | 92893348 | 92920050 |
| chr10 | 92909426 | 92915913 |
| chr10 | 92909426 | 92920050 |
| chr10 | 92934143 | 92940824 |
| chr10 | 93310019 | 93310643 |
| chr10 | 93313019 | 93316813 |
| chr10 | 93347616 | 93349969 |
| chr10 | 93355627 | 93369776 |
| chr10 | 93359832 | 93373085 |
| chr10 | 93359832 | 93374955 |
| chr10 | 93363960 | 93369776 |
| chr10 | 93366391 | 93377429 |
| chr10 | 93381218 | 93389154 |
| chr10 | 93396141 | 93404219 |
| chr10 | 93408786 | 93409739 |
| chr10 | 93408786 | 93426158 |

|       |          |          |
|-------|----------|----------|
| chr10 | 93426070 | 93456937 |
| chr10 | 93500039 | 93507056 |
| chr10 | 93515404 | 93519807 |
| chr10 | 93676652 | 93687449 |
| chr10 | 93684055 | 93687449 |
| chr10 | 94258799 | 94259150 |
| chr10 | 94349249 | 94355093 |
| chr10 | 94350112 | 94352403 |
| chr10 | 94350112 | 94358215 |
| chr10 | 94352309 | 94355093 |
| chr10 | 94356534 | 94358215 |
| chr10 | 94441895 | 94474783 |
| chr10 | 94441895 | 94497172 |
| chr10 | 94441895 | 94511654 |
| chr10 | 94441895 | 94522453 |
| chr10 | 94474667 | 94497172 |
| chr10 | 94474667 | 94500327 |
| chr10 | 94474667 | 94507347 |
| chr10 | 94474667 | 94510179 |
| chr10 | 94474667 | 94511654 |
| chr10 | 94474667 | 94522453 |
| chr10 | 94493364 | 94500327 |
| chr10 | 94493364 | 94507347 |
| chr10 | 94493364 | 94511654 |
| chr10 | 94497054 | 94500327 |
| chr10 | 94497054 | 94511654 |
| chr10 | 94500220 | 94511654 |
| chr10 | 94500220 | 94522083 |
| chr10 | 94500220 | 94522453 |
| chr10 | 94507266 | 94511654 |
| chr10 | 94507266 | 94522453 |
| chr10 | 94510090 | 94511654 |
| chr10 | 94510090 | 94522453 |
| chr10 | 94510090 | 94531460 |
| chr10 | 94511582 | 94522453 |
| chr10 | 94554125 | 94571429 |
| chr10 | 94574553 | 94581522 |
| chr10 | 94588228 | 94594854 |
| chr10 | 94594694 | 94597111 |
| chr10 | 95625361 | 95628492 |
| chr10 | 95632958 | 95637197 |
| chr10 | 95632958 | 95643206 |
| chr10 | 95637092 | 95643206 |
| chr10 | 95680471 | 95693476 |
| chr10 | 96044352 | 96050466 |

|       |          |          |
|-------|----------|----------|
| chr10 | 96132585 | 96156047 |
| chr10 | 96544075 | 96551411 |
| chr10 | 96544075 | 96565426 |
| chr10 | 96544075 | 96576829 |
| chr10 | 96552927 | 96576829 |
| chr10 | 96559658 | 96576829 |
| chr10 | 96907264 | 96944245 |
| chr10 | 96907264 | 96949295 |
| chr10 | 96907264 | 96952196 |
| chr10 | 96944112 | 96952196 |
| chr10 | 96949007 | 96952196 |
| chr10 | 97229146 | 97266125 |
| chr10 | 97235216 | 97264906 |
| chr10 | 97243967 | 97246337 |
| chr10 | 97243967 | 97263629 |
| chr10 | 97246271 | 97259628 |
| chr10 | 97259401 | 97266125 |
| chr10 | 97263419 | 97266125 |
| chr10 | 97385165 | 97388624 |
| chr10 | 97388251 | 97388624 |
| chr10 | 97390422 | 97393760 |
| chr10 | 97460694 | 97464013 |
| chr10 | 97476682 | 97478389 |
| chr10 | 97656284 | 97656974 |
| chr10 | 97656284 | 97662968 |
| chr10 | 97656284 | 97664984 |
| chr10 | 97743093 | 97744915 |
| chr10 | 98156092 | 98163397 |
| chr10 | 98156092 | 98209899 |
| chr10 | 98162882 | 98186563 |
| chr10 | 98186466 | 98209899 |
| chr10 | 98231511 | 98236164 |
| chr10 | 992488   | 1001013  |
| chr10 | 992488   | 999095   |
| chr10 | 99402579 | 99420805 |
| chr10 | 995928   | 1005907  |
| chr10 | 99661445 | 99696122 |
| chr10 | 99679260 | 99679875 |
| chr10 | 99716347 | 99727563 |
| chr10 | 99888824 | 99896397 |
| chr10 | 99894945 | 99898285 |
| chr10 | 99894945 | 99898760 |
| chr10 | 99894945 | 99900066 |
| chr10 | 99894945 | 99909146 |
| chr10 | 99898085 | 99900066 |



|       |           |           |
|-------|-----------|-----------|
| chr10 | 999002    | 1005907   |
| chr10 | 999002    | 1007128   |
| chr10 | 99907994  | 99909146  |
| chr10 | 99969114  | 99972134  |
| chr11 | 1000431   | 1003804   |
| chr11 | 10028451  | 10031170  |
| chr11 | 10028451  | 10042981  |
| chr11 | 100941783 | 100949956 |
| chr11 | 102114143 | 102186131 |
| chr11 | 102162455 | 102206074 |
| chr11 | 102186017 | 102206074 |
| chr11 | 102186017 | 102206086 |
| chr11 | 102186017 | 102209564 |
| chr11 | 102186017 | 102223752 |
| chr11 | 102186017 | 102227581 |
| chr11 | 102205892 | 102209564 |
| chr11 | 102205892 | 102223752 |
| chr11 | 102350843 | 102368548 |
| chr11 | 102362895 | 102368548 |
| chr11 | 103064274 | 103082839 |
| chr11 | 103115176 | 103121496 |
| chr11 | 103116569 | 103121496 |
| chr11 | 103158676 | 103166048 |
| chr11 | 103188496 | 103198063 |
| chr11 | 103215720 | 103223086 |
| chr11 | 103219914 | 103223086 |
| chr11 | 103220622 | 103223086 |
| chr11 | 103222029 | 103223086 |
| chr11 | 103222029 | 103253448 |
| chr11 | 103243692 | 103304720 |
| chr11 | 103253284 | 103259977 |
| chr11 | 103255414 | 103259977 |
| chr11 | 103255414 | 103286386 |
| chr11 | 103255414 | 103287605 |
| chr11 | 103259887 | 103307831 |
| chr11 | 103280347 | 103283085 |
| chr11 | 103280347 | 103287605 |
| chr11 | 103280347 | 103307831 |
| chr11 | 103280347 | 103316620 |
| chr11 | 103280347 | 103323990 |
| chr11 | 103280347 | 103358359 |
| chr11 | 103280347 | 103399872 |
| chr11 | 103280347 | 103436032 |
| chr11 | 103282178 | 103307831 |
| chr11 | 103303092 | 103312033 |

|       |           |           |
|-------|-----------|-----------|
| chr11 | 103303092 | 103316620 |
| chr11 | 103303092 | 103323990 |
| chr11 | 103303092 | 103358359 |
| chr11 | 103303092 | 103399872 |
| chr11 | 103311877 | 103323990 |
| chr11 | 103311877 | 103358359 |
| chr11 | 103316544 | 103323990 |
| chr11 | 103321028 | 103323990 |
| chr11 | 103358242 | 103468705 |
| chr11 | 103399662 | 103456356 |
| chr11 | 103399662 | 103468705 |
| chr11 | 103435942 | 103468705 |
| chr11 | 103455185 | 103456356 |
| chr11 | 103455185 | 103468705 |
| chr11 | 10478525  | 10485039  |
| chr11 | 10519033  | 10534205  |
| chr11 | 106079466 | 106091477 |
| chr11 | 107329917 | 107353736 |
| chr11 | 107348936 | 107353736 |
| chr11 | 107348936 | 107392895 |
| chr11 | 107390073 | 107392895 |
| chr11 | 107390073 | 107418287 |
| chr11 | 107390073 | 107433749 |
| chr11 | 107416208 | 107418287 |
| chr11 | 107428798 | 107443049 |
| chr11 | 107433633 | 107439183 |
| chr11 | 107433633 | 107455776 |
| chr11 | 107510886 | 107522555 |
| chr11 | 107510886 | 107532406 |
| chr11 | 107522298 | 107532406 |
| chr11 | 107618104 | 107656066 |
| chr11 | 10761946  | 10763879  |
| chr11 | 107625396 | 107635765 |
| chr11 | 107630416 | 107650403 |
| chr11 | 107630416 | 107656066 |
| chr11 | 10763430  | 10763879  |
| chr11 | 107803000 | 107806876 |
| chr11 | 107803000 | 107815965 |
| chr11 | 107806716 | 107811794 |
| chr11 | 107806716 | 107815965 |
| chr11 | 10800730  | 10801087  |
| chr11 | 10800730  | 10802209  |
| chr11 | 10803029  | 10806047  |
| chr11 | 10803210  | 10804050  |
| chr11 | 108046269 | 108052801 |

|       |           |           |
|-------|-----------|-----------|
| chr11 | 108070095 | 108073497 |
| chr11 | 108070095 | 108078240 |
| chr11 | 108078175 | 108089623 |
| chr11 | 108088526 | 108089623 |
| chr11 | 108088526 | 108098529 |
| chr11 | 108094390 | 108095691 |
| chr11 | 108094390 | 108098529 |
| chr11 | 108094811 | 108095691 |
| chr11 | 108131906 | 108134316 |
| chr11 | 108131906 | 108135242 |
| chr11 | 108131906 | 108139041 |
| chr11 | 108133819 | 108135242 |
| chr11 | 108138897 | 108140215 |
| chr11 | 108140064 | 108142550 |
| chr11 | 108140064 | 108146359 |
| chr11 | 108169743 | 108173851 |
| chr11 | 108169743 | 108188179 |
| chr11 | 108176245 | 108177090 |
| chr11 | 108185231 | 108186569 |
| chr11 | 108185231 | 108190500 |
| chr11 | 108185402 | 108189330 |
| chr11 | 108186481 | 108189330 |
| chr11 | 108186481 | 108190500 |
| chr11 | 108192117 | 108197420 |
| chr11 | 108227594 | 108229323 |
| chr11 | 108227594 | 108235834 |
| chr11 | 108227594 | 108244118 |
| chr11 | 108227594 | 108267342 |
| chr11 | 108227594 | 108272852 |
| chr11 | 108227775 | 108229323 |
| chr11 | 108227775 | 108235834 |
| chr11 | 108235669 | 108245026 |
| chr11 | 108235669 | 108249102 |
| chr11 | 108235669 | 108259075 |
| chr11 | 108248932 | 108259075 |
| chr11 | 108256214 | 108259075 |
| chr11 | 108256214 | 108267342 |
| chr11 | 108258985 | 108267342 |
| chr11 | 108267170 | 108268609 |
| chr11 | 108267170 | 108271406 |
| chr11 | 108267170 | 108279608 |
| chr11 | 108271063 | 108307984 |
| chr11 | 108279490 | 108284473 |
| chr11 | 108282709 | 108284473 |
| chr11 | 108293312 | 108297382 |

|       |           |           |
|-------|-----------|-----------|
| chr11 | 108297286 | 108304852 |
| chr11 | 108297286 | 108317521 |
| chr11 | 108297286 | 108332037 |
| chr11 | 108301647 | 108304852 |
| chr11 | 108302852 | 108315911 |
| chr11 | 108307896 | 108317521 |
| chr11 | 108312410 | 108327758 |
| chr11 | 108312410 | 108335961 |
| chr11 | 108315822 | 108335961 |
| chr11 | 108315822 | 108354874 |
| chr11 | 108317372 | 108327758 |
| chr11 | 108317372 | 108329238 |
| chr11 | 108317372 | 108332037 |
| chr11 | 108319953 | 108321420 |
| chr11 | 108327644 | 108331557 |
| chr11 | 108327644 | 108332037 |
| chr11 | 108329020 | 108332037 |
| chr11 | 108330213 | 108335961 |
| chr11 | 108332761 | 108347365 |
| chr11 | 108477606 | 108491167 |
| chr11 | 108486156 | 108491167 |
| chr11 | 108673466 | 108679560 |
| chr11 | 108673466 | 108693600 |
| chr11 | 108673466 | 108706837 |
| chr11 | 108673466 | 108723462 |
| chr11 | 108677084 | 108678435 |
| chr11 | 108688935 | 108693600 |
| chr11 | 108688935 | 108723462 |
| chr11 | 108715878 | 108723462 |
| chr11 | 108719796 | 108723462 |
| chr11 | 108838445 | 108841476 |
| chr11 | 110136662 | 110153058 |
| chr11 | 110136662 | 110159490 |
| chr11 | 110136662 | 110163379 |
| chr11 | 110233236 | 110237652 |
| chr11 | 110236098 | 110237652 |
| chr11 | 110247702 | 110279756 |
| chr11 | 110255288 | 110272619 |
| chr11 | 110263959 | 110264874 |
| chr11 | 110272535 | 110279756 |
| chr11 | 110435833 | 110457047 |
| chr11 | 111616242 | 111688162 |
| chr11 | 111700885 | 111705139 |
| chr11 | 111752158 | 111755450 |
| chr11 | 111754498 | 111755450 |

|       |           |           |
|-------|-----------|-----------|
| chr11 | 111754498 | 111759951 |
| chr11 | 111836164 | 111838378 |
| chr11 | 111836164 | 111840809 |
| chr11 | 111836164 | 111857737 |
| chr11 | 111844600 | 111857737 |
| chr11 | 111844600 | 111865251 |
| chr11 | 112028514 | 112033530 |
| chr11 | 112033403 | 112051349 |
| chr11 | 112037272 | 112039397 |
| chr11 | 112037272 | 112045230 |
| chr11 | 112037272 | 112051349 |
| chr11 | 112043465 | 112051349 |
| chr11 | 112045137 | 112051349 |
| chr11 | 112045137 | 112061174 |
| chr11 | 112078214 | 112080558 |
| chr11 | 112199698 | 112202190 |
| chr11 | 11327085  | 11341004  |
| chr11 | 113338773 | 113352207 |
| chr11 | 113741693 | 113744040 |
| chr11 | 113758553 | 113760918 |
| chr11 | 113760208 | 113760918 |
| chr11 | 113808297 | 113829345 |
| chr11 | 113817657 | 113831993 |
| chr11 | 113829196 | 113854335 |
| chr11 | 113833419 | 113854335 |
| chr11 | 113840597 | 113854335 |
| chr11 | 113852500 | 113854335 |
| chr11 | 11432620  | 11448936  |
| chr11 | 116757145 | 116758407 |
| chr11 | 116759073 | 116765446 |
| chr11 | 116760734 | 116765446 |
| chr11 | 116784854 | 116787643 |
| chr11 | 116863667 | 116873636 |
| chr11 | 116927218 | 116957064 |
| chr11 | 117152440 | 117161261 |
| chr11 | 117152440 | 117163892 |
| chr11 | 117159933 | 117161261 |
| chr11 | 117159933 | 117163892 |
| chr11 | 117181415 | 117182806 |
| chr11 | 117234266 | 117246948 |
| chr11 | 117279907 | 117280259 |
| chr11 | 117335604 | 117338668 |
| chr11 | 117335604 | 117344277 |
| chr11 | 117335604 | 117351988 |
| chr11 | 118374895 | 118376694 |

|       |           |           |
|-------|-----------|-----------|
| chr11 | 118468774 | 118480238 |
| chr11 | 118480173 | 118482495 |
| chr11 | 118481714 | 118482495 |
| chr11 | 118481714 | 118484975 |
| chr11 | 118497935 | 118499420 |
| chr11 | 118507528 | 118512025 |
| chr11 | 118509135 | 118512025 |
| chr11 | 118554458 | 118559864 |
| chr11 | 118556905 | 118559864 |
| chr11 | 118581245 | 118584014 |
| chr11 | 118581245 | 118584644 |
| chr11 | 118583178 | 118584644 |
| chr11 | 118583808 | 118584644 |
| chr11 | 118754704 | 118758902 |
| chr11 | 118754704 | 118763306 |
| chr11 | 118756259 | 118758902 |
| chr11 | 118758773 | 118760044 |
| chr11 | 118758773 | 118763306 |
| chr11 | 118758773 | 118765355 |
| chr11 | 118759921 | 118763306 |
| chr11 | 118759921 | 118768352 |
| chr11 | 118765208 | 118768352 |
| chr11 | 118765208 | 118786518 |
| chr11 | 118768222 | 118781184 |
| chr11 | 118768222 | 118786518 |
| chr11 | 118779631 | 118786518 |
| chr11 | 118781120 | 118786518 |
| chr11 | 11880176  | 11897693  |
| chr11 | 11880176  | 11903342  |
| chr11 | 119020149 | 119021886 |
| chr11 | 119070233 | 119071843 |
| chr11 | 119123567 | 119127125 |
| chr11 | 119131534 | 119133219 |
| chr11 | 119179692 | 119182345 |
| chr11 | 11920341  | 11933935  |
| chr11 | 119271734 | 119274953 |
| chr11 | 119271734 | 119276134 |
| chr11 | 119271734 | 119278713 |
| chr11 | 119271734 | 119287946 |
| chr11 | 119273867 | 119274953 |
| chr11 | 119273867 | 119276134 |
| chr11 | 119273867 | 119278713 |
| chr11 | 119273867 | 119285566 |
| chr11 | 119275996 | 119297481 |
| chr11 | 119284968 | 119285566 |

|       |           |           |
|-------|-----------|-----------|
| chr11 | 119296917 | 119297481 |
| chr11 | 119311089 | 119314749 |
| chr11 | 119675158 | 119678765 |
| chr11 | 120406117 | 120424415 |
| chr11 | 120406117 | 120431911 |
| chr11 | 120406117 | 120437382 |
| chr11 | 120406117 | 120440221 |
| chr11 | 120420752 | 120437382 |
| chr11 | 120431770 | 120437382 |
| chr11 | 120440128 | 120445464 |
| chr11 | 120440128 | 120447085 |
| chr11 | 120447873 | 120475507 |
| chr11 | 120448233 | 120449214 |
| chr11 | 120457117 | 120459320 |
| chr11 | 120457720 | 120467308 |
| chr11 | 120457720 | 120473127 |
| chr11 | 120457720 | 120475507 |
| chr11 | 120465236 | 120467308 |
| chr11 | 120465236 | 120473127 |
| chr11 | 120473049 | 120477526 |
| chr11 | 120474559 | 120477526 |
| chr11 | 120475339 | 120477526 |
| chr11 | 120476660 | 120477526 |
| chr11 | 121303365 | 121304493 |
| chr11 | 12138389  | 12162419  |
| chr11 | 121488031 | 121497049 |
| chr11 | 121520656 | 121532552 |
| chr11 | 121532463 | 121559657 |
| chr11 | 12162078  | 12216319  |
| chr11 | 12204249  | 12208139  |
| chr11 | 12226170  | 12227131  |
| chr11 | 12236176  | 12239585  |
| chr11 | 122776218 | 122777210 |
| chr11 | 122776218 | 122789308 |
| chr11 | 122798941 | 122806516 |
| chr11 | 123083084 | 123084713 |
| chr11 | 123594081 | 123594838 |
| chr11 | 123594081 | 123596037 |
| chr11 | 123594081 | 123619224 |
| chr11 | 123608658 | 123610338 |
| chr11 | 123728132 | 123730985 |
| chr11 | 124624930 | 124631417 |
| chr11 | 124647364 | 124648175 |
| chr11 | 124654654 | 124669521 |
| chr11 | 12473744  | 12477949  |

|       |           |           |
|-------|-----------|-----------|
| chr11 | 12473744  | 12496598  |
| chr11 | 12477846  | 12514065  |
| chr11 | 124975095 | 124988134 |
| chr11 | 12504313  | 12514065  |
| chr11 | 125572457 | 125575408 |
| chr11 | 125575262 | 125576315 |
| chr11 | 125575262 | 125579068 |
| chr11 | 125577503 | 125580204 |
| chr11 | 125595880 | 125608289 |
| chr11 | 125597058 | 125611519 |
| chr11 | 125602302 | 125604247 |
| chr11 | 125602302 | 125608289 |
| chr11 | 125605628 | 125608289 |
| chr11 | 125629231 | 125633351 |
| chr11 | 125643791 | 125644643 |
| chr11 | 125983871 | 125989759 |
| chr11 | 126021247 | 126023537 |
| chr11 | 126272968 | 126273454 |
| chr11 | 12675408  | 12764434  |
| chr11 | 12764178  | 12902113  |
| chr11 | 128480190 | 128490576 |
| chr11 | 128484822 | 128490576 |
| chr11 | 128489289 | 128490576 |
| chr11 | 1286001   | 1288776   |
| chr11 | 1286001   | 1290409   |
| chr11 | 1286001   | 1295794   |
| chr11 | 12862249  | 12883125  |
| chr11 | 128758114 | 128768272 |
| chr11 | 128758114 | 128772985 |
| chr11 | 128758114 | 128782023 |
| chr11 | 128768117 | 128782023 |
| chr11 | 128781957 | 128809204 |
| chr11 | 12879707  | 12902113  |
| chr11 | 12881004  | 12902113  |
| chr11 | 1288623   | 1290409   |
| chr11 | 1288623   | 1295794   |
| chr11 | 12901939  | 12930326  |
| chr11 | 129040927 | 129066868 |
| chr11 | 129040927 | 129164427 |
| chr11 | 129062279 | 129066868 |
| chr11 | 129062279 | 129124894 |
| chr11 | 129063901 | 129066868 |
| chr11 | 129093620 | 129124894 |
| chr11 | 129093620 | 129164427 |
| chr11 | 129123445 | 129124894 |



|       |           |           |
|-------|-----------|-----------|
| chr11 | 129123445 | 129164427 |
| chr11 | 129124802 | 129164427 |
| chr11 | 129923247 | 129925229 |
| chr11 | 129937597 | 129947370 |
| chr11 | 129942425 | 129961082 |
| chr11 | 129955511 | 129961082 |
| chr11 | 130109428 | 130110661 |
| chr11 | 130109428 | 130122513 |
| chr11 | 130120705 | 130122513 |
| chr11 | 130126699 | 130133728 |
| chr11 | 130126699 | 130135715 |
| chr11 | 130126699 | 130137291 |
| chr11 | 130903254 | 130906721 |
| chr11 | 13403167  | 13445181  |
| chr11 | 13413529  | 13421838  |
| chr11 | 13413529  | 13445181  |
| chr11 | 134159891 | 134177457 |
| chr11 | 13417157  | 13445181  |
| chr11 | 134176306 | 134194738 |
| chr11 | 134184636 | 134185526 |
| chr11 | 134194015 | 134194738 |
| chr11 | 134206598 | 134209477 |
| chr11 | 134256547 | 134257257 |
| chr11 | 14294470  | 14295855  |
| chr11 | 14474494  | 14498985  |
| chr11 | 14486366  | 14494439  |
| chr11 | 14488491  | 14494439  |
| chr11 | 14513569  | 14519041  |
| chr11 | 14771936  | 14789242  |
| chr11 | 14771936  | 14804050  |
| chr11 | 14789105  | 14819209  |
| chr11 | 14818182  | 14819209  |
| chr11 | 1557793   | 1559055   |
| chr11 | 17091995  | 17092276  |
| chr11 | 17094260  | 17099969  |
| chr11 | 17097056  | 17099969  |
| chr11 | 17097056  | 17112666  |
| chr11 | 17099859  | 17112666  |
| chr11 | 17102661  | 17117671  |
| chr11 | 17131915  | 17136625  |
| chr11 | 17134818  | 17136625  |
| chr11 | 17145667  | 17150655  |
| chr11 | 17145667  | 17155629  |
| chr11 | 17878207  | 18008076  |
| chr11 | 17959469  | 18008076  |

|       |          |          |
|-------|----------|----------|
| chr11 | 17988596 | 17995909 |
| chr11 | 17988596 | 18004535 |
| chr11 | 17988596 | 18008076 |
| chr11 | 18000496 | 18008076 |
| chr11 | 18083534 | 18089510 |
| chr11 | 18083534 | 18096854 |
| chr11 | 18086865 | 18089510 |
| chr11 | 18281949 | 18297717 |
| chr11 | 18283794 | 18285459 |
| chr11 | 18283794 | 18286710 |
| chr11 | 18291441 | 18292976 |
| chr11 | 18295019 | 18297717 |
| chr11 | 18333059 | 18341607 |
| chr11 | 18339563 | 18341607 |
| chr11 | 18347587 | 18347919 |
| chr11 | 18399430 | 18403811 |
| chr11 | 18399430 | 18405572 |
| chr11 | 18400836 | 18403811 |
| chr11 | 18402839 | 18403811 |
| chr11 | 18412708 | 18429910 |
| chr11 | 18434739 | 18438645 |
| chr11 | 18502485 | 18519603 |
| chr11 | 18506856 | 18509665 |
| chr11 | 18514677 | 18516164 |
| chr11 | 18514677 | 18519603 |
| chr11 | 18544622 | 18558330 |
| chr11 | 18544622 | 18565010 |
| chr11 | 18546879 | 18558330 |
| chr11 | 18546879 | 18570377 |
| chr11 | 18564891 | 18578808 |
| chr11 | 18611476 | 18612488 |
| chr11 | 19142977 | 19152320 |
| chr11 | 19155795 | 19166385 |
| chr11 | 19225220 | 19235058 |
| chr11 | 19832483 | 19880127 |
| chr11 | 19832483 | 19892594 |
| chr11 | 19868924 | 19892594 |
| chr11 | 19892433 | 19939773 |
| chr11 | 19939660 | 19984247 |
| chr11 | 20043980 | 20045670 |
| chr11 | 20043980 | 20055957 |
| chr11 | 20054079 | 20062359 |
| chr11 | 20054079 | 20083179 |
| chr11 | 20062306 | 20083179 |
| chr11 | 20367173 | 20376717 |

|       |          |          |
|-------|----------|----------|
| chr11 | 20388018 | 20402984 |
| chr11 | 20388018 | 20408032 |
| chr11 | 20389743 | 20402984 |
| chr11 | 20389743 | 20408032 |
| chr11 | 20392210 | 20397721 |
| chr11 | 20392210 | 20402984 |
| chr11 | 20395802 | 20397721 |
| chr11 | 20395802 | 20408032 |
| chr11 | 20395802 | 20426865 |
| chr11 | 20402918 | 20408032 |
| chr11 | 20402918 | 20426865 |
| chr11 | 20402918 | 20464546 |
| chr11 | 20402918 | 20494254 |
| chr11 | 20407910 | 20452208 |
| chr11 | 20407910 | 20464546 |
| chr11 | 20407910 | 20494254 |
| chr11 | 20452129 | 20464546 |
| chr11 | 20461979 | 20494254 |
| chr11 | 224077   | 233215   |
| chr11 | 22674849 | 22685789 |
| chr11 | 22674849 | 22737768 |
| chr11 | 230451   | 233534   |
| chr11 | 238997   | 244761   |
| chr11 | 244040   | 248855   |
| chr11 | 244160   | 247448   |
| chr11 | 2570627  | 2588854  |
| chr11 | 2587569  | 2588854  |
| chr11 | 28058925 | 28084808 |
| chr11 | 28058925 | 28091513 |
| chr11 | 28062394 | 28091513 |
| chr11 | 28077006 | 28091513 |
| chr11 | 28077006 | 28094800 |
| chr11 | 28211061 | 28296931 |
| chr11 | 2949226  | 2959909  |
| chr11 | 2949226  | 2979237  |
| chr11 | 2951258  | 2959909  |
| chr11 | 2951258  | 2979237  |
| chr11 | 2951779  | 2958544  |
| chr11 | 2955743  | 2979237  |
| chr11 | 2969802  | 2972243  |
| chr11 | 2969802  | 2979237  |
| chr11 | 2976023  | 2979237  |
| chr11 | 30330885 | 30332993 |
| chr11 | 3122347  | 3129169  |
| chr11 | 31456259 | 31473786 |

|       |          |          |
|-------|----------|----------|
| chr11 | 31460625 | 31463305 |
| chr11 | 31627109 | 31650221 |
| chr11 | 32097143 | 32098528 |
| chr11 | 32587011 | 32589135 |
| chr11 | 32587011 | 32589641 |
| chr11 | 32587011 | 32601822 |
| chr11 | 32588593 | 32589135 |
| chr11 | 32588593 | 32589641 |
| chr11 | 32589546 | 32595013 |
| chr11 | 32589546 | 32596047 |
| chr11 | 32927156 | 32928123 |
| chr11 | 32927156 | 32958086 |
| chr11 | 32953856 | 32973549 |
| chr11 | 32957868 | 32973549 |
| chr11 | 32966299 | 32973549 |
| chr11 | 33027685 | 33028792 |
| chr11 | 33043749 | 33054725 |
| chr11 | 33043749 | 33058139 |
| chr11 | 33043749 | 33059095 |
| chr11 | 33102176 | 33106064 |
| chr11 | 33105566 | 33106064 |
| chr11 | 33141666 | 33141986 |
| chr11 | 33286412 | 33328633 |
| chr11 | 33286412 | 33341686 |
| chr11 | 33328509 | 33341686 |
| chr11 | 33337074 | 33341686 |
| chr11 | 33338756 | 33341686 |
| chr11 | 33347292 | 33349287 |
| chr11 | 33551039 | 33552241 |
| chr11 | 33559748 | 33598947 |
| chr11 | 33583337 | 33598947 |
| chr11 | 33583337 | 33618662 |
| chr11 | 33583337 | 33661014 |
| chr11 | 33591236 | 33618662 |
| chr11 | 33618532 | 33646036 |
| chr11 | 34071725 | 34076642 |
| chr11 | 34071725 | 34090678 |
| chr11 | 34076559 | 34082877 |
| chr11 | 34076559 | 34083041 |
| chr11 | 34079627 | 34083041 |
| chr11 | 34079627 | 34092056 |
| chr11 | 34082824 | 34089456 |
| chr11 | 34086063 | 34086413 |
| chr11 | 34086063 | 34090678 |
| chr11 | 34086063 | 34092056 |

|       |          |          |
|-------|----------|----------|
| chr11 | 34086304 | 34090678 |
| chr11 | 34089394 | 34090678 |
| chr11 | 34089394 | 34092056 |
| chr11 | 34090178 | 34090678 |
| chr11 | 34090178 | 34092056 |
| chr11 | 34108210 | 34127599 |
| chr11 | 34108210 | 34132221 |
| chr11 | 34113715 | 34118503 |
| chr11 | 34113715 | 34127599 |
| chr11 | 34115822 | 34118503 |
| chr11 | 34122458 | 34124400 |
| chr11 | 34134318 | 34135291 |
| chr11 | 34197324 | 34204690 |
| chr11 | 34453089 | 34456817 |
| chr11 | 34931403 | 34960518 |
| chr11 | 34931403 | 34966814 |
| chr11 | 34931403 | 34970286 |
| chr11 | 34931403 | 34992379 |
| chr11 | 34947505 | 34970286 |
| chr11 | 34947505 | 34978182 |
| chr11 | 34957383 | 34960518 |
| chr11 | 34957383 | 34970286 |
| chr11 | 34957383 | 34978182 |
| chr11 | 34957383 | 34984728 |
| chr11 | 34957383 | 34992379 |
| chr11 | 34970138 | 34984728 |
| chr11 | 34978123 | 34984728 |
| chr11 | 35176574 | 35186900 |
| chr11 | 35189834 | 35219387 |
| chr11 | 35196745 | 35211449 |
| chr11 | 35201081 | 35201787 |
| chr11 | 35204511 | 35206243 |
| chr11 | 35211245 | 35221732 |
| chr11 | 36081652 | 36098461 |
| chr11 | 36494975 | 36501537 |
| chr11 | 36610080 | 36636117 |
| chr11 | 36610080 | 36648155 |
| chr11 | 36633283 | 36648155 |
| chr11 | 3679553  | 3686194  |
| chr11 | 3683199  | 3691489  |
| chr11 | 3691346  | 3693375  |
| chr11 | 3691346  | 3695606  |
| chr11 | 3693231  | 3695606  |
| chr11 | 3695448  | 3700839  |
| chr11 | 3695448  | 3702892  |

|       |          |          |
|-------|----------|----------|
| chr11 | 3695448  | 3720825  |
| chr11 | 3699081  | 3702892  |
| chr11 | 3702462  | 3706627  |
| chr11 | 3705199  | 3706627  |
| chr11 | 3705199  | 3753408  |
| chr11 | 3713817  | 3720825  |
| chr11 | 3713817  | 3725219  |
| chr11 | 3713817  | 3744649  |
| chr11 | 3719411  | 3720825  |
| chr11 | 3719411  | 3725219  |
| chr11 | 3719411  | 3753408  |
| chr11 | 3731390  | 3735324  |
| chr11 | 3731390  | 3744649  |
| chr11 | 3731390  | 3753408  |
| chr11 | 3731390  | 3763039  |
| chr11 | 3735190  | 3753408  |
| chr11 | 3744508  | 3753408  |
| chr11 | 3744508  | 3760626  |
| chr11 | 3744508  | 3763039  |
| chr11 | 3753315  | 3768744  |
| chr11 | 375638   | 376351   |
| chr11 | 3762901  | 3776021  |
| chr11 | 3762901  | 3782145  |
| chr11 | 3768580  | 3771928  |
| chr11 | 3768580  | 3776021  |
| chr11 | 3768580  | 3779257  |
| chr11 | 3768580  | 3782145  |
| chr11 | 3773631  | 3776021  |
| chr11 | 3778872  | 3782145  |
| chr11 | 3967551  | 4023987  |
| chr11 | 4055525  | 4070203  |
| chr11 | 4055525  | 4074679  |
| chr11 | 4070025  | 4086543  |
| chr11 | 4101992  | 4106223  |
| chr11 | 4101992  | 4109703  |
| chr11 | 4101992  | 4112062  |
| chr11 | 4106045  | 4109703  |
| chr11 | 4106045  | 4112062  |
| chr11 | 4107434  | 4112062  |
| chr11 | 4107434  | 4126833  |
| chr11 | 4121603  | 4123384  |
| chr11 | 4127034  | 4129150  |
| chr11 | 43318639 | 43330564 |
| chr11 | 43326506 | 43328893 |
| chr11 | 43326506 | 43335994 |

|       |          |          |
|-------|----------|----------|
| chr11 | 43327788 | 43335994 |
| chr11 | 43379232 | 43389821 |
| chr11 | 43389651 | 43398113 |
| chr11 | 43389651 | 43414776 |
| chr11 | 43391464 | 43398113 |
| chr11 | 43403997 | 43407577 |
| chr11 | 43414589 | 43436334 |
| chr11 | 43448001 | 43451265 |
| chr11 | 43750910 | 43798427 |
| chr11 | 43798319 | 43840064 |
| chr11 | 43815436 | 43840064 |
| chr11 | 43830975 | 43840064 |
| chr11 | 43882582 | 43892129 |
| chr11 | 44107682 | 44109283 |
| chr11 | 44107682 | 44114301 |
| chr11 | 44107682 | 44126955 |
| chr11 | 44107682 | 44130138 |
| chr11 | 44107682 | 44171742 |
| chr11 | 44114184 | 44130138 |
| chr11 | 44114184 | 44171742 |
| chr11 | 44124788 | 44130138 |
| chr11 | 44935560 | 44938366 |
| chr11 | 45181760 | 45204778 |
| chr11 | 45858730 | 45861032 |
| chr11 | 45862059 | 45872233 |
| chr11 | 45903988 | 45905249 |
| chr11 | 45913818 | 45916303 |
| chr11 | 45965314 | 45979966 |
| chr11 | 46076753 | 46084302 |
| chr11 | 46076753 | 46092223 |
| chr11 | 46084165 | 46092223 |
| chr11 | 46408512 | 46512813 |
| chr11 | 46433473 | 46435037 |
| chr11 | 46433473 | 46443598 |
| chr11 | 46433473 | 46508370 |
| chr11 | 46493607 | 46508370 |
| chr11 | 46493607 | 46512813 |
| chr11 | 46508190 | 46512813 |
| chr11 | 46541944 | 46548500 |
| chr11 | 46547112 | 46548500 |
| chr11 | 46688172 | 46696156 |
| chr11 | 46750273 | 46751534 |
| chr11 | 46752634 | 46755067 |
| chr11 | 46754887 | 46760784 |
| chr11 | 46754887 | 46788773 |

|       |          |          |
|-------|----------|----------|
| chr11 | 46758922 | 46760784 |
| chr11 | 46760611 | 46763179 |
| chr11 | 46769962 | 46788773 |
| chr11 | 46776254 | 46788773 |
| chr11 | 46776254 | 46790583 |
| chr11 | 46778459 | 46788773 |
| chr11 | 46778459 | 46790583 |
| chr11 | 46780193 | 46788773 |
| chr11 | 46783273 | 46788773 |
| chr11 | 46783273 | 46790583 |
| chr11 | 46788680 | 46790583 |
| chr11 | 46790075 | 46790583 |
| chr11 | 46795593 | 46809874 |
| chr11 | 46797804 | 46809874 |
| chr11 | 46801199 | 46809874 |
| chr11 | 46808030 | 46809874 |
| chr11 | 46808030 | 46811178 |
| chr11 | 46808030 | 46821268 |
| chr11 | 46809399 | 46811178 |
| chr11 | 46809399 | 46821268 |
| chr11 | 46809741 | 46821268 |
| chr11 | 46811006 | 46816404 |
| chr11 | 46811006 | 46821268 |
| chr11 | 46816197 | 46821268 |
| chr11 | 46987207 | 47052518 |
| chr11 | 47166267 | 47168251 |
| chr11 | 47420263 | 47420727 |
| chr11 | 47422573 | 47422973 |
| chr11 | 47424045 | 47425950 |
| chr11 | 47472190 | 47483532 |
| chr11 | 47472190 | 47489024 |
| chr11 | 47482694 | 47484523 |
| chr11 | 47482694 | 47489024 |
| chr11 | 47483452 | 47484523 |
| chr11 | 47484388 | 47489024 |
| chr11 | 47486749 | 47500932 |
| chr11 | 47499452 | 47500932 |
| chr11 | 47625673 | 47631711 |
| chr11 | 47627079 | 47631087 |
| chr11 | 47627079 | 47635571 |
| chr11 | 47627079 | 47639051 |
| chr11 | 47628952 | 47635571 |
| chr11 | 47638698 | 47639051 |
| chr11 | 47722975 | 47724172 |
| chr11 | 47724027 | 47731561 |



|       |          |          |
|-------|----------|----------|
| chr11 | 47731373 | 47734129 |
| chr11 | 47731373 | 47736740 |
| chr11 | 47734024 | 47736740 |
| chr11 | 47750915 | 47751290 |
| chr11 | 47750915 | 47765362 |
| chr11 | 47752915 | 47754664 |
| chr11 | 47783072 | 47786554 |
| chr11 | 47783072 | 47788611 |
| chr11 | 47783072 | 47792946 |
| chr11 | 47797778 | 47801930 |
| chr11 | 47803437 | 47808529 |
| chr11 | 47815478 | 47819458 |
| chr11 | 47835650 | 47837623 |
| chr11 | 48142918 | 48150183 |
| chr11 | 48144999 | 48160049 |
| chr11 | 48153795 | 48156119 |
| chr11 | 48159929 | 48164515 |
| chr11 | 497970   | 502181   |
| chr11 | 57414614 | 57421373 |
| chr11 | 57491223 | 57491862 |
| chr11 | 57672020 | 57693915 |
| chr11 | 57692610 | 57696043 |
| chr11 | 57692610 | 57696873 |
| chr11 | 57794009 | 57796992 |
| chr11 | 57795576 | 57802196 |
| chr11 | 581491   | 582081   |
| chr11 | 581491   | 587464   |
| chr11 | 581491   | 592674   |
| chr11 | 58584855 | 58611738 |
| chr11 | 58609829 | 58616815 |
| chr11 | 58610949 | 58611738 |
| chr11 | 592558   | 598502   |
| chr11 | 59600495 | 59610589 |
| chr11 | 59608483 | 59610589 |
| chr11 | 59639047 | 59639383 |
| chr11 | 59639047 | 59643035 |
| chr11 | 59649461 | 59651641 |
| chr11 | 59658865 | 59659469 |
| chr11 | 596922   | 598502   |
| chr11 | 59773210 | 59788947 |
| chr11 | 59787036 | 59797396 |
| chr11 | 59788872 | 59795482 |
| chr11 | 60897845 | 60903861 |
| chr11 | 60919685 | 60920988 |
| chr11 | 61303864 | 61312084 |

|       |          |          |
|-------|----------|----------|
| chr11 | 61311783 | 61314486 |
| chr11 | 61311783 | 61331691 |
| chr11 | 61321594 | 61323094 |
| chr11 | 61323010 | 61331691 |
| chr11 | 61323978 | 61326893 |
| chr11 | 61326778 | 61330074 |
| chr11 | 61329362 | 61330074 |
| chr11 | 61334619 | 61342844 |
| chr11 | 61334619 | 61345946 |
| chr11 | 61356529 | 61357828 |
| chr11 | 61364251 | 61366216 |
| chr11 | 61366044 | 61367998 |
| chr11 | 61410937 | 61411937 |
| chr11 | 61410937 | 61416519 |
| chr11 | 61410937 | 61429290 |
| chr11 | 61411768 | 61429290 |
| chr11 | 61415665 | 61416519 |
| chr11 | 61415665 | 61429290 |
| chr11 | 61420469 | 61429290 |
| chr11 | 61437624 | 61438113 |
| chr11 | 61527914 | 61533124 |
| chr11 | 61806663 | 61811075 |
| chr11 | 61810750 | 61813353 |
| chr11 | 62128150 | 62128883 |
| chr11 | 62128150 | 62130590 |
| chr11 | 62128150 | 62137883 |
| chr11 | 6222441  | 6224707  |
| chr11 | 62535002 | 62536567 |
| chr11 | 62535944 | 62536567 |
| chr11 | 62566805 | 62567528 |
| chr11 | 62581105 | 62581701 |
| chr11 | 62595263 | 62595891 |
| chr11 | 62605112 | 62607099 |
| chr11 | 62606957 | 62611596 |
| chr11 | 62628768 | 62629295 |
| chr11 | 62633004 | 62639731 |
| chr11 | 62638982 | 62639731 |
| chr11 | 62663235 | 62664973 |
| chr11 | 62694567 | 62702549 |
| chr11 | 62720022 | 62724426 |
| chr11 | 62723586 | 62724426 |
| chr11 | 62781893 | 62782825 |
| chr11 | 62801093 | 62802260 |
| chr11 | 62827154 | 62827631 |
| chr11 | 62839113 | 62839428 |

|       |          |          |
|-------|----------|----------|
| chr11 | 62839113 | 62839659 |
| chr11 | 62852810 | 62854938 |
| chr11 | 62853551 | 62855466 |
| chr11 | 62853800 | 62854938 |
| chr11 | 62853800 | 62855216 |
| chr11 | 62870744 | 62871669 |
| chr11 | 62881018 | 62882066 |
| chr11 | 62881892 | 62885608 |
| chr11 | 62881892 | 62888218 |
| chr11 | 62882907 | 62885608 |
| chr11 | 62882907 | 62888218 |
| chr11 | 63590099 | 63598163 |
| chr11 | 63631039 | 63644261 |
| chr11 | 63643356 | 63646563 |
| chr11 | 63644168 | 63659252 |
| chr11 | 63651935 | 63652575 |
| chr11 | 63658760 | 63659252 |
| chr11 | 63895158 | 63895633 |
| chr11 | 63952237 | 63952839 |
| chr11 | 6400988  | 6403822  |
| chr11 | 64151238 | 64152393 |
| chr11 | 64193077 | 64194620 |
| chr11 | 64193077 | 64197974 |
| chr11 | 64193077 | 64203622 |
| chr11 | 64194188 | 64197397 |
| chr11 | 64194188 | 64197974 |
| chr11 | 64197270 | 64197974 |
| chr11 | 64264950 | 64265502 |
| chr11 | 64685645 | 64690476 |
| chr11 | 64757778 | 64758704 |
| chr11 | 64766899 | 64767251 |
| chr11 | 64766899 | 64776626 |
| chr11 | 64769222 | 64776626 |
| chr11 | 64927801 | 64928425 |
| chr11 | 64930321 | 64930589 |
| chr11 | 65034846 | 65035663 |
| chr11 | 65187954 | 65210872 |
| chr11 | 6519599  | 6520102  |
| chr11 | 65266581 | 65268729 |
| chr11 | 65266581 | 65275998 |
| chr11 | 65266581 | 65282521 |
| chr11 | 65275891 | 65282521 |
| chr11 | 65287715 | 65295990 |
| chr11 | 65294152 | 65295990 |
| chr11 | 65340384 | 65346359 |

|       |          |          |
|-------|----------|----------|
| chr11 | 65389360 | 65394425 |
| chr11 | 65393572 | 65394425 |
| chr11 | 653961   | 688460   |
| chr11 | 65605760 | 65608448 |
| chr11 | 65635528 | 65636307 |
| chr11 | 65645853 | 65647658 |
| chr11 | 65649756 | 65650051 |
| chr11 | 65655687 | 65658499 |
| chr11 | 65655687 | 65662205 |
| chr11 | 65661686 | 65662205 |
| chr11 | 65861946 | 65865894 |
| chr11 | 65862210 | 65865145 |
| chr11 | 65864496 | 65865145 |
| chr11 | 65894013 | 65897006 |
| chr11 | 65920342 | 65920662 |
| chr11 | 66059200 | 66059595 |
| chr11 | 66063627 | 66068333 |
| chr11 | 66210361 | 66211259 |
| chr11 | 66263659 | 66263952 |
| chr11 | 66271796 | 66275935 |
| chr11 | 66365935 | 66366564 |
| chr11 | 66365935 | 66367869 |
| chr11 | 66365935 | 66369532 |
| chr11 | 66486539 | 66487342 |
| chr11 | 66486539 | 66488007 |
| chr11 | 66521269 | 66526807 |
| chr11 | 66599115 | 66600549 |
| chr11 | 66748378 | 66759096 |
| chr11 | 66748378 | 66788269 |
| chr11 | 66748378 | 66828364 |
| chr11 | 66748378 | 66838445 |
| chr11 | 66796280 | 66828364 |
| chr11 | 66803994 | 66822674 |
| chr11 | 66816052 | 66822674 |
| chr11 | 66816052 | 66828364 |
| chr11 | 66816052 | 66838445 |
| chr11 | 66821642 | 66822674 |
| chr11 | 66821642 | 66828364 |
| chr11 | 66871314 | 66872159 |
| chr11 | 67180078 | 67181892 |
| chr11 | 67180078 | 67219403 |
| chr11 | 67180078 | 67243092 |
| chr11 | 67181845 | 67219403 |
| chr11 | 67207509 | 67219403 |
| chr11 | 67207509 | 67231960 |

|       |          |          |
|-------|----------|----------|
| chr11 | 67215339 | 67215949 |
| chr11 | 67215339 | 67217884 |
| chr11 | 67215339 | 67219403 |
| chr11 | 67215339 | 67228163 |
| chr11 | 67215339 | 67231960 |
| chr11 | 67217730 | 67228163 |
| chr11 | 67217730 | 67231960 |
| chr11 | 67281649 | 67282365 |
| chr11 | 67283706 | 67285188 |
| chr11 | 67291475 | 67292180 |
| chr11 | 67393495 | 67393790 |
| chr11 | 674535   | 688460   |
| chr11 | 67497916 | 67498322 |
| chr11 | 67608395 | 67609635 |
| chr11 | 67608395 | 67611207 |
| chr11 | 67608551 | 67609635 |
| chr11 | 678693   | 681089   |
| chr11 | 679687   | 681089   |
| chr11 | 68032151 | 68033283 |
| chr11 | 68061952 | 68068937 |
| chr11 | 68061952 | 68070857 |
| chr11 | 68061952 | 68081457 |
| chr11 | 68065785 | 68081457 |
| chr11 | 68066428 | 68074830 |
| chr11 | 68068878 | 68097130 |
| chr11 | 68070188 | 68081457 |
| chr11 | 68081403 | 68097130 |
| chr11 | 68166981 | 68185928 |
| chr11 | 68166981 | 68190152 |
| chr11 | 68171542 | 68180200 |
| chr11 | 68175017 | 68185928 |
| chr11 | 68180131 | 68190152 |
| chr11 | 68185780 | 68190152 |
| chr11 | 68347846 | 68357847 |
| chr11 | 68347846 | 68365702 |
| chr11 | 68347846 | 68390052 |
| chr11 | 68357649 | 68363943 |
| chr11 | 68357649 | 68365702 |
| chr11 | 68357649 | 68429700 |
| chr11 | 68363746 | 68365702 |
| chr11 | 68386315 | 68390052 |
| chr11 | 68403482 | 68406813 |
| chr11 | 68403482 | 68416527 |
| chr11 | 68403482 | 68426187 |
| chr11 | 68406523 | 68416527 |

|       |          |          |
|-------|----------|----------|
| chr11 | 68423488 | 68426187 |
| chr11 | 68423488 | 68429700 |
| chr11 | 68423488 | 68433838 |
| chr11 | 68429574 | 68433838 |
| chr11 | 684897   | 688460   |
| chr11 | 68505144 | 68519651 |
| chr11 | 68505144 | 68537891 |
| chr11 | 68505144 | 68548204 |
| chr11 | 68505144 | 68603492 |
| chr11 | 68519500 | 68537891 |
| chr11 | 68519500 | 68548204 |
| chr11 | 68519500 | 68551186 |
| chr11 | 68519500 | 68554257 |
| chr11 | 68519500 | 68558679 |
| chr11 | 68519500 | 68583129 |
| chr11 | 68537658 | 68551186 |
| chr11 | 68537658 | 68554257 |
| chr11 | 68548066 | 68564432 |
| chr11 | 68548066 | 68571104 |
| chr11 | 68548066 | 68574224 |
| chr11 | 68551120 | 68564432 |
| chr11 | 68554144 | 68583129 |
| chr11 | 68558565 | 68596218 |
| chr11 | 68564302 | 68576043 |
| chr11 | 68564302 | 68603492 |
| chr11 | 68567013 | 68571104 |
| chr11 | 68567013 | 68576043 |
| chr11 | 68567013 | 68583129 |
| chr11 | 68567013 | 68596218 |
| chr11 | 68569747 | 68576043 |
| chr11 | 68569747 | 68596218 |
| chr11 | 68571039 | 68603492 |
| chr11 | 68574108 | 68583129 |
| chr11 | 68574108 | 68596218 |
| chr11 | 68583042 | 68596218 |
| chr11 | 68590659 | 68603492 |
| chr11 | 68596096 | 68603492 |
| chr11 | 68600340 | 68603492 |
| chr11 | 68601862 | 68603492 |
| chr11 | 68759568 | 68761687 |
| chr11 | 68780639 | 68785010 |
| chr11 | 68780639 | 68793402 |
| chr11 | 68780639 | 68794911 |
| chr11 | 68793314 | 68796933 |
| chr11 | 68793314 | 68807638 |

|       |          |          |
|-------|----------|----------|
| chr11 | 68793314 | 68812576 |
| chr11 | 68794803 | 68799355 |
| chr11 | 68796855 | 68812576 |
| chr11 | 68799217 | 68807638 |
| chr11 | 68803999 | 68807638 |
| chr11 | 68803999 | 68812576 |
| chr11 | 68807466 | 68812576 |
| chr11 | 69054032 | 69057694 |
| chr11 | 69054032 | 69062990 |
| chr11 | 69067502 | 69079020 |
| chr11 | 6932093  | 6943641  |
| chr11 | 6941570  | 6943641  |
| chr11 | 69667894 | 69673321 |
| chr11 | 70324401 | 70326818 |
| chr11 | 70330172 | 70335694 |
| chr11 | 70330172 | 70339306 |
| chr11 | 70330172 | 70343892 |
| chr11 | 70333469 | 70343892 |
| chr11 | 70343668 | 70348420 |
| chr11 | 70348188 | 70356254 |
| chr11 | 70350993 | 70356254 |
| chr11 | 70354300 | 70356254 |
| chr11 | 70354300 | 70362488 |
| chr11 | 70362094 | 70376600 |
| chr11 | 70376531 | 70378195 |
| chr11 | 70405264 | 70407591 |
| chr11 | 70405264 | 70409960 |
| chr11 | 70405264 | 70414652 |
| chr11 | 70405264 | 70417123 |
| chr11 | 70405264 | 70419856 |
| chr11 | 70405264 | 70420510 |
| chr11 | 70405264 | 70422995 |
| chr11 | 70409830 | 70414652 |
| chr11 | 70409830 | 70420510 |
| chr11 | 70417012 | 70419856 |
| chr11 | 70417012 | 70420510 |
| chr11 | 70419745 | 70420510 |
| chr11 | 70422939 | 70431280 |
| chr11 | 70659827 | 70661678 |
| chr11 | 70659827 | 70698763 |
| chr11 | 70798442 | 70820682 |
| chr11 | 71109940 | 71119032 |
| chr11 | 71147119 | 71224796 |
| chr11 | 71464052 | 71473366 |
| chr11 | 71916073 | 71919026 |

|       |          |          |
|-------|----------|----------|
| chr11 | 71982760 | 71987111 |
| chr11 | 71982760 | 71990717 |
| chr11 | 71999926 | 72001552 |
| chr11 | 72006034 | 72007435 |
| chr11 | 72098288 | 72099256 |
| chr11 | 72110087 | 72111496 |
| chr11 | 72307198 | 72380384 |
| chr11 | 72380280 | 72408204 |
| chr11 | 72707174 | 72714321 |
| chr11 | 72709869 | 72711141 |
| chr11 | 72709869 | 72711499 |
| chr11 | 72709869 | 72714321 |
| chr11 | 72712195 | 72714321 |
| chr11 | 72726619 | 72732597 |
| chr11 | 72755700 | 72759381 |
| chr11 | 72757766 | 72759381 |
| chr11 | 72757766 | 72781294 |
| chr11 | 72849754 | 72889945 |
| chr11 | 72849754 | 72902638 |
| chr11 | 72867864 | 72889945 |
| chr11 | 72867864 | 72902638 |
| chr11 | 72867864 | 72921950 |
| chr11 | 72887469 | 72889945 |
| chr11 | 72887469 | 72902638 |
| chr11 | 72984087 | 72989097 |
| chr11 | 72984087 | 73001134 |
| chr11 | 72984087 | 73015885 |
| chr11 | 72984087 | 73083740 |
| chr11 | 73000989 | 73015885 |
| chr11 | 73000989 | 73083740 |
| chr11 | 73359833 | 73361161 |
| chr11 | 73389111 | 73391223 |
| chr11 | 73409486 | 73411536 |
| chr11 | 73419873 | 73430770 |
| chr11 | 73707419 | 73716362 |
| chr11 | 73707419 | 73718718 |
| chr11 | 73707419 | 73718890 |
| chr11 | 73707419 | 73720899 |
| chr11 | 73707419 | 73730823 |
| chr11 | 73716250 | 73720899 |
| chr11 | 73716250 | 73730823 |
| chr11 | 73825707 | 73844976 |
| chr11 | 73825707 | 73860009 |
| chr11 | 73844806 | 73860009 |
| chr11 | 73899145 | 73900420 |



|       |          |          |
|-------|----------|----------|
| chr11 | 73909398 | 73919032 |
| chr11 | 73964877 | 73968458 |
| chr11 | 74028286 | 74034278 |
| chr11 | 74048204 | 74057544 |
| chr11 | 74074252 | 74078717 |
| chr11 | 74109033 | 74118382 |
| chr11 | 74113779 | 74139828 |
| chr11 | 74118227 | 74133557 |
| chr11 | 74118227 | 74161556 |
| chr11 | 74132843 | 74133557 |
| chr11 | 74132843 | 74139828 |
| chr11 | 74132843 | 74161556 |
| chr11 | 74203727 | 74204445 |
| chr11 | 74203727 | 74222369 |
| chr11 | 74203727 | 74239256 |
| chr11 | 74222311 | 74239256 |
| chr11 | 74225204 | 74239256 |
| chr11 | 74230244 | 74239256 |
| chr11 | 74368491 | 74374582 |
| chr11 | 74604691 | 74613010 |
| chr11 | 74634582 | 74636275 |
| chr11 | 74789625 | 74810330 |
| chr11 | 74789625 | 74817714 |
| chr11 | 74810183 | 74817714 |
| chr11 | 74810183 | 74834775 |
| chr11 | 74848114 | 74852082 |
| chr11 | 74859157 | 74863021 |
| chr11 | 74906238 | 74907273 |
| chr11 | 74965033 | 74969699 |
| chr11 | 75477618 | 75490320 |
| chr11 | 755878   | 760253   |
| chr11 | 75797157 | 75798429 |
| chr11 | 75851882 | 75861780 |
| chr11 | 75851882 | 75888903 |
| chr11 | 75851882 | 75961549 |
| chr11 | 75861745 | 75888903 |
| chr11 | 75879878 | 75888903 |
| chr11 | 75879878 | 75912039 |
| chr11 | 75879878 | 75961549 |
| chr11 | 75911953 | 75983513 |
| chr11 | 75961443 | 75983513 |
| chr11 | 75961443 | 76065788 |
| chr11 | 75983386 | 76016980 |
| chr11 | 76007533 | 76016980 |
| chr11 | 76007533 | 76065788 |

|       |          |          |
|-------|----------|----------|
| chr11 | 76451857 | 76464080 |
| chr11 | 76458182 | 76464080 |
| chr11 | 76458182 | 76472840 |
| chr11 | 76463820 | 76472840 |
| chr11 | 76496214 | 76516312 |
| chr11 | 76496214 | 76528466 |
| chr11 | 76513385 | 76516312 |
| chr11 | 76513385 | 76523291 |
| chr11 | 76513385 | 76528466 |
| chr11 | 76523154 | 76528466 |
| chr11 | 76958978 | 76998821 |
| chr11 | 76959076 | 76990574 |
| chr11 | 76959076 | 76998821 |
| chr11 | 76976288 | 76998821 |
| chr11 | 771332   | 775142   |
| chr11 | 77332729 | 77340763 |
| chr11 | 77332729 | 77353599 |
| chr11 | 77340645 | 77349287 |
| chr11 | 77349238 | 77379994 |
| chr11 | 77355667 | 77359017 |
| chr11 | 77355667 | 77379994 |
| chr11 | 77374327 | 77379994 |
| chr11 | 77374327 | 77392541 |
| chr11 | 77379240 | 77379994 |
| chr11 | 77619605 | 77622673 |
| chr11 | 77619605 | 77625818 |
| chr11 | 77619605 | 77629899 |
| chr11 | 77622499 | 77625818 |
| chr11 | 77622499 | 77629899 |
| chr11 | 77624962 | 77625818 |
| chr11 | 77624962 | 77629899 |
| chr11 | 77672041 | 77678153 |
| chr11 | 77672041 | 77693611 |
| chr11 | 77675035 | 77678153 |
| chr11 | 77675035 | 77693611 |
| chr11 | 77683709 | 77693611 |
| chr11 | 77685104 | 77693611 |
| chr11 | 77691158 | 77693611 |
| chr11 | 77691158 | 77698693 |
| chr11 | 77725544 | 77747128 |
| chr11 | 77725544 | 77764689 |
| chr11 | 77740730 | 77747128 |
| chr11 | 77740730 | 77764689 |
| chr11 | 77883831 | 77891840 |
| chr11 | 77891318 | 77907810 |

|       |          |          |
|-------|----------|----------|
| chr11 | 77921339 | 77922471 |
| chr11 | 77928341 | 77981576 |
| chr11 | 77938650 | 77941251 |
| chr11 | 77938650 | 77961138 |
| chr11 | 77938650 | 77981576 |
| chr11 | 77941179 | 77961138 |
| chr11 | 77941179 | 77981576 |
| chr11 | 77955941 | 77961138 |
| chr11 | 77955941 | 77981576 |
| chr11 | 77955941 | 77991299 |
| chr11 | 77978995 | 77981576 |
| chr11 | 77978995 | 77991299 |
| chr11 | 78103979 | 78124214 |
| chr11 | 78106806 | 78121174 |
| chr11 | 78109441 | 78121174 |
| chr11 | 78112649 | 78121174 |
| chr11 | 78112649 | 78127436 |
| chr11 | 78113885 | 78121174 |
| chr11 | 78113885 | 78127436 |
| chr11 | 78119181 | 78124214 |
| chr11 | 78119181 | 78127436 |
| chr11 | 78207529 | 78210744 |
| chr11 | 78443660 | 78478683 |
| chr11 | 78465875 | 78478683 |
| chr11 | 78465875 | 78493195 |
| chr11 | 78465875 | 78571444 |
| chr11 | 78469246 | 78493195 |
| chr11 | 78469246 | 78571444 |
| chr11 | 78493062 | 78571444 |
| chr11 | 78528841 | 78566272 |
| chr11 | 78528841 | 78571444 |
| chr11 | 78559538 | 78571444 |
| chr11 | 78568631 | 78571444 |
| chr11 | 8089609  | 8090231  |
| chr11 | 821957   | 824436   |
| chr11 | 82838386 | 82860117 |
| chr11 | 82849048 | 82860117 |
| chr11 | 83167124 | 83171914 |
| chr11 | 83198478 | 83211430 |
| chr11 | 83206057 | 83211430 |
| chr11 | 83206057 | 83227872 |
| chr11 | 83206057 | 83236509 |
| chr11 | 83273646 | 83278829 |
| chr11 | 83273646 | 83280260 |
| chr11 | 83278725 | 83280260 |

|       |          |          |
|-------|----------|----------|
| chr11 | 847200   | 850367   |
| chr11 | 847200   | 866001   |
| chr11 | 85111660 | 85626753 |
| chr11 | 85598656 | 85626753 |
| chr11 | 85634085 | 85635778 |
| chr11 | 85974707 | 85981228 |
| chr11 | 85974707 | 85983973 |
| chr11 | 85974707 | 86003451 |
| chr11 | 85974707 | 86014963 |
| chr11 | 85974707 | 86026367 |
| chr11 | 85974707 | 86031611 |
| chr11 | 85981128 | 85983973 |
| chr11 | 85981128 | 85990399 |
| chr11 | 85981128 | 85996929 |
| chr11 | 85981128 | 86003451 |
| chr11 | 85981128 | 86007583 |
| chr11 | 85981128 | 86031611 |
| chr11 | 85981744 | 85982003 |
| chr11 | 85981744 | 85983973 |
| chr11 | 85981744 | 85990399 |
| chr11 | 85981744 | 85996929 |
| chr11 | 85990249 | 86031611 |
| chr11 | 85996825 | 86001158 |
| chr11 | 85996825 | 86003451 |
| chr11 | 85996825 | 86007583 |
| chr11 | 85996825 | 86012392 |
| chr11 | 85996825 | 86014963 |
| chr11 | 85996825 | 86031611 |
| chr11 | 86000642 | 86003451 |
| chr11 | 86000642 | 86031611 |
| chr11 | 86003365 | 86031611 |
| chr11 | 86007541 | 86026367 |
| chr11 | 86007541 | 86031611 |
| chr11 | 86011029 | 86022469 |
| chr11 | 86011029 | 86026367 |
| chr11 | 86011029 | 86031611 |
| chr11 | 86014869 | 86026367 |
| chr11 | 86014869 | 86031611 |
| chr11 | 86022366 | 86031611 |
| chr11 | 86250295 | 86252240 |
| chr11 | 86250295 | 86256512 |
| chr11 | 86250295 | 86257596 |
| chr11 | 86250295 | 86264263 |
| chr11 | 86250295 | 86266216 |
| chr11 | 86264171 | 86268561 |

|       |          |          |
|-------|----------|----------|
| chr11 | 86487336 | 86508867 |
| chr11 | 86556552 | 86559823 |
| chr11 | 87067693 | 87071615 |
| chr11 | 87067693 | 87091395 |
| chr11 | 87067693 | 87157406 |
| chr11 | 8707084  | 8712735  |
| chr11 | 87295781 | 87306005 |
| chr11 | 8750620  | 8811335  |
| chr11 | 88300529 | 88312554 |
| chr11 | 88309162 | 88312554 |
| chr11 | 8912452  | 8914930  |
| chr11 | 8965903  | 8966656  |
| chr11 | 8965903  | 8968041  |
| chr11 | 90210535 | 90218184 |
| chr11 | 90214017 | 90218184 |
| chr11 | 9144994  | 9165967  |
| chr11 | 9150080  | 9170777  |
| chr11 | 9152357  | 9170777  |
| chr11 | 9160712  | 9170777  |
| chr11 | 9160712  | 9193681  |
| chr11 | 9160712  | 9207632  |
| chr11 | 9178131  | 9207632  |
| chr11 | 9193493  | 9207632  |
| chr11 | 9203659  | 9207632  |
| chr11 | 9283370  | 9287806  |
| chr11 | 9283370  | 9299701  |
| chr11 | 9286454  | 9295387  |
| chr11 | 9286454  | 9299701  |
| chr11 | 9287701  | 9295387  |
| chr11 | 9288441  | 9299701  |
| chr11 | 93154107 | 93184520 |
| chr11 | 93154107 | 93185814 |
| chr11 | 93162705 | 93166016 |
| chr11 | 93675570 | 93679552 |
| chr11 | 93675570 | 93687865 |
| chr11 | 93679411 | 93691775 |
| chr11 | 93679411 | 93728821 |
| chr11 | 93683558 | 93687865 |
| chr11 | 93702459 | 93702919 |
| chr11 | 93702459 | 93706897 |
| chr11 | 93724253 | 93725831 |
| chr11 | 93729869 | 93730148 |
| chr11 | 93747296 | 93754037 |
| chr11 | 93747296 | 93757465 |
| chr11 | 93747296 | 93759858 |

|       |          |          |
|-------|----------|----------|
| chr11 | 93788000 | 93790793 |
| chr11 | 93788000 | 93794035 |
| chr11 | 93790573 | 93794035 |
| chr11 | 93790573 | 93796540 |
| chr11 | 93790573 | 93801972 |
| chr11 | 93793727 | 93794035 |
| chr11 | 93793950 | 93796540 |
| chr11 | 93794907 | 93801972 |
| chr11 | 93796409 | 93801972 |
| chr11 | 93807517 | 93809876 |
| chr11 | 9403289  | 9414411  |
| chr11 | 9403289  | 9420698  |
| chr11 | 9408485  | 9414411  |
| chr11 | 9408485  | 9420698  |
| chr11 | 9408485  | 9425262  |
| chr11 | 9409927  | 9417148  |
| chr11 | 9414254  | 9417148  |
| chr11 | 9414254  | 9425262  |
| chr11 | 9420410  | 9420698  |
| chr11 | 9420410  | 9423876  |
| chr11 | 9420410  | 9425262  |
| chr11 | 9420410  | 9431003  |
| chr11 | 9423005  | 9425262  |
| chr11 | 9428539  | 9429196  |
| chr11 | 9428539  | 9431003  |
| chr11 | 9429673  | 9431003  |
| chr11 | 9429673  | 9433846  |
| chr11 | 9433569  | 9442197  |
| chr11 | 9434933  | 9438285  |
| chr11 | 9436270  | 9440661  |
| chr11 | 9437753  | 9438285  |
| chr11 | 9437753  | 9442197  |
| chr11 | 9438079  | 9442197  |
| chr11 | 9440454  | 9442197  |
| chr11 | 94429910 | 94437235 |
| chr11 | 94429910 | 94447438 |
| chr11 | 94429910 | 94456338 |
| chr11 | 94429910 | 94461036 |
| chr11 | 94429910 | 94464239 |
| chr11 | 94435831 | 94447438 |
| chr11 | 94435831 | 94471759 |
| chr11 | 94445809 | 94447438 |
| chr11 | 94445809 | 94456338 |
| chr11 | 94445809 | 94461036 |
| chr11 | 94456275 | 94492906 |

|       |          |          |
|-------|----------|----------|
| chr11 | 94459407 | 94471759 |
| chr11 | 94478734 | 94492906 |
| chr11 | 94485923 | 94490965 |
| chr11 | 94568729 | 94577492 |
| chr11 | 94568729 | 94589232 |
| chr11 | 94568729 | 94597915 |
| chr11 | 94574998 | 94583569 |
| chr11 | 94583447 | 94587247 |
| chr11 | 94583447 | 94589232 |
| chr11 | 94595308 | 94601979 |
| chr11 | 9471301  | 9474633  |
| chr11 | 94795010 | 94800311 |
| chr11 | 94795010 | 94831541 |
| chr11 | 94799389 | 94821821 |
| chr11 | 94821529 | 94831541 |
| chr11 | 94830049 | 94831541 |
| chr11 | 94850113 | 94859715 |
| chr11 | 94853932 | 94859715 |
| chr11 | 9494645  | 9497800  |
| chr11 | 9494645  | 9516362  |
| chr11 | 95775921 | 95779926 |
| chr11 | 95779606 | 95788563 |
| chr11 | 95783064 | 95788563 |
| chr11 | 95799231 | 95813111 |
| chr11 | 95799231 | 95813589 |
| chr11 | 95812931 | 95813589 |
| chr11 | 95812931 | 95817903 |
| chr11 | 95812931 | 95818904 |
| chr11 | 95812931 | 95828027 |
| chr11 | 95841616 | 95847899 |
| chr11 | 95847713 | 95850749 |
| chr11 | 95847713 | 95857635 |
| chr11 | 95847713 | 95888261 |
| chr11 | 959436   | 972255   |
| chr11 | 95985530 | 95991723 |
| chr11 | 96358992 | 96383473 |
| chr11 | 9713465  | 9729451  |
| chr11 | 9713465  | 9732710  |
| chr11 | 972061   | 981299   |
| chr11 | 9724657  | 9732710  |
| chr11 | 9738212  | 9749183  |
| chr11 | 977094   | 988689   |
| chr11 | 9795830  | 9809002  |
| chr11 | 9807999  | 9809002  |
| chr11 | 9839497  | 9852749  |

|       |           |           |
|-------|-----------|-----------|
| chr11 | 9856457   | 9858396   |
| chr11 | 992502    | 1000598   |
| chr11 | 992502    | 994245    |
| chr11 | 9961956   | 10002689  |
| chr11 | 9961956   | 10193987  |
| chr11 | 9961956   | 9963882   |
| chr11 | 9961956   | 9989595   |
| chr11 | 9989496   | 10001022  |
| chr11 | 9989496   | 10002689  |
| chr11 | 9989496   | 10031170  |
| chr11 | 9989496   | 9998379   |
| chr12 | 100047529 | 100072813 |
| chr12 | 100095666 | 100108548 |
| chr12 | 100097364 | 100098541 |
| chr12 | 100097364 | 100103951 |
| chr12 | 100102765 | 100108548 |
| chr12 | 100204939 | 100205744 |
| chr12 | 100204939 | 100205757 |
| chr12 | 100204939 | 100207786 |
| chr12 | 100207662 | 100212528 |
| chr12 | 100282942 | 100291660 |
| chr12 | 100282942 | 100298175 |
| chr12 | 100282942 | 100312653 |
| chr12 | 100313421 | 100329319 |
| chr12 | 100591735 | 100601753 |
| chr12 | 100591735 | 100612141 |
| chr12 | 100591735 | 100618587 |
| chr12 | 100591735 | 100622382 |
| chr12 | 100594874 | 100601753 |
| chr12 | 100594874 | 100612141 |
| chr12 | 100594874 | 100618587 |
| chr12 | 100618448 | 100622382 |
| chr12 | 101306698 | 101308343 |
| chr12 | 101308184 | 101311798 |
| chr12 | 101308184 | 101312276 |
| chr12 | 101311718 | 101312276 |
| chr12 | 101319544 | 101321629 |
| chr12 | 101329240 | 101333444 |
| chr12 | 101333300 | 101334504 |
| chr12 | 101334424 | 101338957 |
| chr12 | 101340522 | 101343093 |
| chr12 | 101340522 | 101344750 |
| chr12 | 101342445 | 101343093 |
| chr12 | 101356553 | 101365625 |
| chr12 | 101363575 | 101367976 |



|       |           |           |
|-------|-----------|-----------|
| chr12 | 101372883 | 101373767 |
| chr12 | 101383040 | 101383669 |
| chr12 | 101396398 | 101405981 |
| chr12 | 101714089 | 101716812 |
| chr12 | 101714089 | 101720254 |
| chr12 | 101714089 | 101723847 |
| chr12 | 101753371 | 101760143 |
| chr12 | 101780151 | 101790057 |
| chr12 | 101786011 | 101790057 |
| chr12 | 101786011 | 101796762 |
| chr12 | 101897862 | 101901433 |
| chr12 | 101897862 | 101920201 |
| chr12 | 101908185 | 101914232 |
| chr12 | 102025973 | 102046119 |
| chr12 | 102039867 | 102046119 |
| chr12 | 102085765 | 102118583 |
| chr12 | 102099105 | 102112232 |
| chr12 | 102101031 | 102118583 |
| chr12 | 102148229 | 102165883 |
| chr12 | 102148229 | 102182627 |
| chr12 | 1027747   | 1116033   |
| chr12 | 1027747   | 1263165   |
| chr12 | 1027747   | 1371977   |
| chr12 | 1027747   | 1444750   |
| chr12 | 103793163 | 103797031 |
| chr12 | 103796893 | 103815121 |
| chr12 | 103798586 | 103806929 |
| chr12 | 103932825 | 103943319 |
| chr12 | 103976917 | 103980962 |
| chr12 | 103979830 | 103980962 |
| chr12 | 103982798 | 103985728 |
| chr12 | 104019629 | 104021491 |
| chr12 | 104093385 | 104096433 |
| chr12 | 104120399 | 104123423 |
| chr12 | 104120399 | 104135532 |
| chr12 | 104288930 | 104334332 |
| chr12 | 104288930 | 104339273 |
| chr12 | 104311289 | 104315896 |
| chr12 | 104311289 | 104327671 |
| chr12 | 104311289 | 104339273 |
| chr12 | 104318912 | 104327671 |
| chr12 | 104321090 | 104327671 |
| chr12 | 104325336 | 104327671 |
| chr12 | 104327514 | 104331641 |
| chr12 | 104331533 | 104339273 |

|       |           |           |
|-------|-----------|-----------|
| chr12 | 104844471 | 104895345 |
| chr12 | 104861290 | 104928694 |
| chr12 | 104886292 | 104895345 |
| chr12 | 104909654 | 104928694 |
| chr12 | 105149614 | 105160148 |
| chr12 | 105149614 | 105162845 |
| chr12 | 105177225 | 105195501 |
| chr12 | 105189990 | 105195501 |
| chr12 | 106070773 | 106072843 |
| chr12 | 106363869 | 106369683 |
| chr12 | 106363869 | 106380139 |
| chr12 | 106366515 | 106369683 |
| chr12 | 106376358 | 106380139 |
| chr12 | 106393030 | 106410960 |
| chr12 | 106410825 | 106427358 |
| chr12 | 106410825 | 106444590 |
| chr12 | 106437056 | 106444590 |
| chr12 | 106454501 | 106457296 |
| chr12 | 106783996 | 106825820 |
| chr12 | 106814695 | 106825820 |
| chr12 | 106814695 | 106843947 |
| chr12 | 106825725 | 106843947 |
| chr12 | 106825725 | 106860412 |
| chr12 | 106842588 | 106843947 |
| chr12 | 106842588 | 106851594 |
| chr12 | 106842588 | 106860412 |
| chr12 | 106851449 | 106860412 |
| chr12 | 106992964 | 106999862 |
| chr12 | 106999550 | 107000082 |
| chr12 | 10713210  | 10715783  |
| chr12 | 10713210  | 10719143  |
| chr12 | 107688447 | 107704747 |
| chr12 | 107699372 | 107710510 |
| chr12 | 107742220 | 107746424 |
| chr12 | 107743196 | 107746424 |
| chr12 | 107744542 | 107746424 |
| chr12 | 1083163   | 1104824   |
| chr12 | 1083163   | 1190052   |
| chr12 | 1083163   | 1263165   |
| chr12 | 1083163   | 1290012   |
| chr12 | 108530141 | 108539089 |
| chr12 | 108538933 | 108549214 |
| chr12 | 108545138 | 108549214 |
| chr12 | 108652271 | 108654410 |
| chr12 | 108652271 | 108662158 |

|       |           |           |
|-------|-----------|-----------|
| chr12 | 108652271 | 108678394 |
| chr12 | 108652271 | 108701323 |
| chr12 | 108657303 | 108658919 |
| chr12 | 108657303 | 108662158 |
| chr12 | 108657303 | 108701323 |
| chr12 | 108658737 | 108662158 |
| chr12 | 108678271 | 108701323 |
| chr12 | 108817037 | 108823361 |
| chr12 | 108817037 | 108852678 |
| chr12 | 108818248 | 108852678 |
| chr12 | 10882216  | 10883096  |
| chr12 | 10882216  | 10884275  |
| chr12 | 10882216  | 11047188  |
| chr12 | 109056681 | 109073532 |
| chr12 | 109067523 | 109073532 |
| chr12 | 109101901 | 109103611 |
| chr12 | 109102838 | 109103611 |
| chr12 | 109216617 | 109216920 |
| chr12 | 109222506 | 109223904 |
| chr12 | 109249983 | 109259108 |
| chr12 | 109258267 | 109259108 |
| chr12 | 109456117 | 109458078 |
| chr12 | 109481636 | 109483981 |
| chr12 | 109516764 | 109526416 |
| chr12 | 109586021 | 109591357 |
| chr12 | 109590770 | 109595181 |
| chr12 | 10973654  | 11047188  |
| chr12 | 109855618 | 109858741 |
| chr12 | 109906571 | 109908937 |
| chr12 | 109938379 | 109939247 |
| chr12 | 109938379 | 109961685 |
| chr12 | 109951166 | 109959958 |
| chr12 | 109953091 | 109961375 |
| chr12 | 109961612 | 109991760 |
| chr12 | 109980951 | 109983694 |
| chr12 | 109980951 | 109991760 |
| chr12 | 110012004 | 110013249 |
| chr12 | 110012004 | 110016433 |
| chr12 | 110012004 | 110019328 |
| chr12 | 110013124 | 110029635 |
| chr12 | 110016387 | 110025823 |
| chr12 | 110018344 | 110019328 |
| chr12 | 110018344 | 110025823 |
| chr12 | 110018344 | 110029635 |
| chr12 | 110024045 | 110027766 |

|       |           |           |
|-------|-----------|-----------|
| chr12 | 110025741 | 110029635 |
| chr12 | 110029477 | 110030758 |
| chr12 | 110033796 | 110036328 |
| chr12 | 110127359 | 110129130 |
| chr12 | 110128949 | 110132636 |
| chr12 | 110128949 | 110147048 |
| chr12 | 110128949 | 110163065 |
| chr12 | 110134947 | 110135437 |
| chr12 | 110180421 | 110203950 |
| chr12 | 110203863 | 110205680 |
| chr12 | 110282603 | 110296737 |
| chr12 | 110292019 | 110296737 |
| chr12 | 110292019 | 110323072 |
| chr12 | 110322991 | 110328017 |
| chr12 | 110326389 | 110328017 |
| chr12 | 110326389 | 110334143 |
| chr12 | 110332596 | 110334143 |
| chr12 | 110332596 | 110340994 |
| chr12 | 110340658 | 110342448 |
| chr12 | 11034781  | 11047188  |
| chr12 | 110381751 | 110396452 |
| chr12 | 110382842 | 110388623 |
| chr12 | 110387738 | 110388623 |
| chr12 | 110387738 | 110396452 |
| chr12 | 110388511 | 110396452 |
| chr12 | 110455585 | 110455930 |
| chr12 | 110455585 | 110457634 |
| chr12 | 110473077 | 110486717 |
| chr12 | 1104749   | 1116033   |
| chr12 | 1104749   | 1141787   |
| chr12 | 110485077 | 110487943 |
| chr12 | 110505616 | 110506693 |
| chr12 | 110538143 | 110551968 |
| chr12 | 110545879 | 110551968 |
| chr12 | 110730528 | 110731901 |
| chr12 | 1110191   | 1116033   |
| chr12 | 1110191   | 1190052   |
| chr12 | 111464661 | 111510582 |
| chr12 | 111470107 | 111470742 |
| chr12 | 111470107 | 111486824 |
| chr12 | 111485270 | 111486824 |
| chr12 | 111485270 | 111510582 |
| chr12 | 111509548 | 111510582 |
| chr12 | 111509548 | 111513539 |
| chr12 | 111509548 | 111520076 |

|       |           |           |
|-------|-----------|-----------|
| chr12 | 111509548 | 111552977 |
| chr12 | 111513356 | 111518427 |
| chr12 | 111513356 | 111520076 |
| chr12 | 111513356 | 111525316 |
| chr12 | 111513356 | 111555919 |
| chr12 | 111516153 | 111520076 |
| chr12 | 111520881 | 111525316 |
| chr12 | 111525191 | 111552977 |
| chr12 | 111525191 | 111555919 |
| chr12 | 111552279 | 111552977 |
| chr12 | 111552279 | 111555919 |
| chr12 | 1115865   | 1190052   |
| chr12 | 1115865   | 1236904   |
| chr12 | 111649938 | 111660675 |
| chr12 | 111649938 | 111665787 |
| chr12 | 111655565 | 111660675 |
| chr12 | 111658735 | 111659345 |
| chr12 | 111658735 | 111660675 |
| chr12 | 111658735 | 111679340 |
| chr12 | 111658735 | 111681835 |
| chr12 | 111672660 | 111683307 |
| chr12 | 111692696 | 111712657 |
| chr12 | 111692696 | 111734068 |
| chr12 | 111705737 | 111709684 |
| chr12 | 111727961 | 111734068 |
| chr12 | 111792060 | 111798242 |
| chr12 | 111865249 | 111871180 |
| chr12 | 111867571 | 111871180 |
| chr12 | 111932585 | 111943369 |
| chr12 | 111933885 | 111938210 |
| chr12 | 111933885 | 111943369 |
| chr12 | 111933885 | 111991889 |
| chr12 | 111936691 | 111943369 |
| chr12 | 112043087 | 112061388 |
| chr12 | 112061180 | 112087801 |
| chr12 | 112068879 | 112074764 |
| chr12 | 112068879 | 112078741 |
| chr12 | 112068879 | 112087801 |
| chr12 | 112071894 | 112075789 |
| chr12 | 112071894 | 112078741 |
| chr12 | 112071894 | 112090864 |
| chr12 | 112071894 | 112093136 |
| chr12 | 112074674 | 112075789 |
| chr12 | 112074674 | 112093136 |
| chr12 | 112075677 | 112078741 |

|       |           |           |
|-------|-----------|-----------|
| chr12 | 112075677 | 112081134 |
| chr12 | 112075677 | 112093136 |
| chr12 | 112078187 | 112087801 |
| chr12 | 112078187 | 112093136 |
| chr12 | 112081059 | 112093136 |
| chr12 | 112090725 | 112093136 |
| chr12 | 112130510 | 112135066 |
| chr12 | 112167316 | 112167917 |
| chr12 | 112175735 | 112176702 |
| chr12 | 112203635 | 112204623 |
| chr12 | 112203635 | 112228811 |
| chr12 | 112204485 | 112228811 |
| chr12 | 112207873 | 112208630 |
| chr12 | 112210014 | 112228811 |
| chr12 | 112216291 | 112217195 |
| chr12 | 112216291 | 112219489 |
| chr12 | 112229697 | 112231715 |
| chr12 | 112229697 | 112233085 |
| chr12 | 112229697 | 112251134 |
| chr12 | 112239051 | 112240027 |
| chr12 | 112258495 | 112259265 |
| chr12 | 112258495 | 112264212 |
| chr12 | 112258495 | 112265983 |
| chr12 | 112269703 | 112273795 |
| chr12 | 112269703 | 112274960 |
| chr12 | 112269703 | 112283302 |
| chr12 | 112306063 | 112309669 |
| chr12 | 112306063 | 112313147 |
| chr12 | 112306063 | 112319742 |
| chr12 | 112313016 | 112319742 |
| chr12 | 112446275 | 112456063 |
| chr12 | 112446275 | 112473040 |
| chr12 | 112450317 | 112456063 |
| chr12 | 112472943 | 112478015 |
| chr12 | 112472943 | 112482205 |
| chr12 | 112472943 | 112486629 |
| chr12 | 112477650 | 112478015 |
| chr12 | 112482073 | 112489175 |
| chr12 | 112486474 | 112489175 |
| chr12 | 112502143 | 112504796 |
| chr12 | 112946742 | 112950975 |
| chr12 | 113176839 | 113181058 |
| chr12 | 113225243 | 113226964 |
| chr12 | 113267842 | 113269845 |
| chr12 | 113320330 | 113321348 |

|       |           |           |
|-------|-----------|-----------|
| chr12 | 113942323 | 113945924 |
| chr12 | 116096668 | 116111512 |
| chr12 | 116096668 | 116237705 |
| chr12 | 116111427 | 116237705 |
| chr12 | 116719762 | 116723223 |
| chr12 | 116749840 | 116779348 |
| chr12 | 116833791 | 116836282 |
| chr12 | 116928022 | 116949706 |
| chr12 | 116928022 | 116964854 |
| chr12 | 116945363 | 116949706 |
| chr12 | 116945363 | 116964854 |
| chr12 | 116949617 | 116964854 |
| chr12 | 117155790 | 117174341 |
| chr12 | 117172470 | 117177641 |
| chr12 | 11752449  | 11853561  |
| chr12 | 118019071 | 118020985 |
| chr12 | 118019071 | 118022359 |
| chr12 | 118019071 | 118025828 |
| chr12 | 118019071 | 118028030 |
| chr12 | 118024850 | 118028030 |
| chr12 | 118042840 | 118043377 |
| chr12 | 1183280   | 1263165   |
| chr12 | 118386113 | 118391282 |
| chr12 | 11839139  | 11869969  |
| chr12 | 11884444  | 11886026  |
| chr12 | 1189858   | 1290012   |
| chr12 | 119714196 | 119782637 |
| chr12 | 119718244 | 119735357 |
| chr12 | 119752049 | 119767182 |
| chr12 | 119757370 | 119761055 |
| chr12 | 119757370 | 119767182 |
| chr12 | 119760938 | 119767182 |
| chr12 | 119775785 | 119776842 |
| chr12 | 119803205 | 119825368 |
| chr12 | 119803205 | 119850275 |
| chr12 | 119822819 | 119825368 |
| chr12 | 119822819 | 119834228 |
| chr12 | 119822819 | 119850275 |
| chr12 | 119832770 | 119850275 |
| chr12 | 119850173 | 119857698 |
| chr12 | 119869059 | 119876181 |
| chr12 | 120098810 | 120103949 |
| chr12 | 120149605 | 120151391 |
| chr12 | 120154969 | 120155719 |
| chr12 | 120155591 | 120156604 |

|       |           |           |
|-------|-----------|-----------|
| chr12 | 120155591 | 120156992 |
| chr12 | 120173652 | 120174169 |
| chr12 | 120173652 | 120176217 |
| chr12 | 120175161 | 120176217 |
| chr12 | 120177446 | 120178950 |
| chr12 | 120199117 | 120199485 |
| chr12 | 120221622 | 120224377 |
| chr12 | 120222862 | 120224377 |
| chr12 | 120353298 | 120364755 |
| chr12 | 120557281 | 120557682 |
| chr12 | 120560725 | 120566980 |
| chr12 | 120562944 | 120563943 |
| chr12 | 120562944 | 120566980 |
| chr12 | 120565071 | 120566980 |
| chr12 | 120716627 | 120717042 |
| chr12 | 120782654 | 120791557 |
| chr12 | 121232413 | 121233092 |
| chr12 | 12124564  | 12126921  |
| chr12 | 12124564  | 12130893  |
| chr12 | 121252660 | 121270945 |
| chr12 | 121268637 | 121270945 |
| chr12 | 121268637 | 121274585 |
| chr12 | 12130782  | 12135300  |
| chr12 | 12130782  | 12147556  |
| chr12 | 121318276 | 121320459 |
| chr12 | 121330582 | 121347005 |
| chr12 | 121335532 | 121337392 |
| chr12 | 121335532 | 121346031 |
| chr12 | 121335532 | 121347005 |
| chr12 | 121342002 | 121347881 |
| chr12 | 121345838 | 121347881 |
| chr12 | 121416158 | 121417911 |
| chr12 | 121416158 | 121420334 |
| chr12 | 121416158 | 121420778 |
| chr12 | 121417860 | 121420778 |
| chr12 | 12148941  | 12151038  |
| chr12 | 121494578 | 121578946 |
| chr12 | 121532805 | 121534590 |
| chr12 | 121548876 | 121549638 |
| chr12 | 12158828  | 12162419  |
| chr12 | 12158828  | 12165295  |
| chr12 | 121743628 | 121752223 |
| chr12 | 121743628 | 121761738 |
| chr12 | 121743628 | 121771549 |
| chr12 | 121761648 | 121773513 |



|       |           |           |
|-------|-----------|-----------|
| chr12 | 121780871 | 121781192 |
| chr12 | 12179809  | 12203400  |
| chr12 | 121799846 | 121802784 |
| chr12 | 121894738 | 121903107 |
| chr12 | 121899633 | 121903107 |
| chr12 | 121942533 | 121949061 |
| chr12 | 122030699 | 122035427 |
| chr12 | 122030699 | 122044053 |
| chr12 | 122035330 | 122044053 |
| chr12 | 122138814 | 122141083 |
| chr12 | 122216487 | 122218397 |
| chr12 | 122216487 | 122224748 |
| chr12 | 122235785 | 122239945 |
| chr12 | 122238586 | 122239945 |
| chr12 | 122238586 | 122242508 |
| chr12 | 122242381 | 122244762 |
| chr12 | 122249870 | 122251099 |
| chr12 | 122261260 | 122264199 |
| chr12 | 122278153 | 122279145 |
| chr12 | 122288488 | 122316855 |
| chr12 | 122288488 | 122319348 |
| chr12 | 122309761 | 122316855 |
| chr12 | 122336631 | 122341697 |
| chr12 | 122347374 | 122380558 |
| chr12 | 122352725 | 122380558 |
| chr12 | 122360958 | 122364107 |
| chr12 | 122377388 | 122380558 |
| chr12 | 122477840 | 122478292 |
| chr12 | 122477840 | 122480311 |
| chr12 | 122489385 | 122492789 |
| chr12 | 122506833 | 122508447 |
| chr12 | 122508217 | 122511188 |
| chr12 | 122511108 | 122515227 |
| chr12 | 122517226 | 122521428 |
| chr12 | 122534663 | 122543634 |
| chr12 | 122544158 | 122546674 |
| chr12 | 122544158 | 122547969 |
| chr12 | 122544158 | 122549864 |
| chr12 | 122546175 | 122547969 |
| chr12 | 122546175 | 122549864 |
| chr12 | 122557383 | 122557689 |
| chr12 | 122557383 | 122562699 |
| chr12 | 122568260 | 122574380 |
| chr12 | 122568260 | 122577029 |
| chr12 | 122569680 | 122574380 |

|       |           |           |
|-------|-----------|-----------|
| chr12 | 122570875 | 122574380 |
| chr12 | 122577671 | 122580670 |
| chr12 | 122577671 | 122582985 |
| chr12 | 122579904 | 122582985 |
| chr12 | 122582704 | 122584990 |
| chr12 | 122584277 | 122584990 |
| chr12 | 122584277 | 122585774 |
| chr12 | 122584277 | 122586757 |
| chr12 | 122584277 | 122588816 |
| chr12 | 122587710 | 122588816 |
| chr12 | 122594275 | 122602887 |
| chr12 | 122597730 | 122624688 |
| chr12 | 122618342 | 122622607 |
| chr12 | 122618342 | 122624688 |
| chr12 | 122777490 | 122781330 |
| chr12 | 122777490 | 122792121 |
| chr12 | 122777490 | 122798200 |
| chr12 | 122777490 | 122806295 |
| chr12 | 122781163 | 122792121 |
| chr12 | 122785718 | 122788929 |
| chr12 | 122785718 | 122792121 |
| chr12 | 122788757 | 122792121 |
| chr12 | 122797306 | 122798200 |
| chr12 | 122932191 | 122935431 |
| chr12 | 122935271 | 122940995 |
| chr12 | 122981128 | 122982538 |
| chr12 | 123004393 | 123005548 |
| chr12 | 123012612 | 123014042 |
| chr12 | 123160780 | 123164090 |
| chr12 | 123166654 | 123203375 |
| chr12 | 123194385 | 123198334 |
| chr12 | 123194385 | 123203375 |
| chr12 | 123194385 | 123223127 |
| chr12 | 123210055 | 123223127 |
| chr12 | 123210055 | 123227616 |
| chr12 | 123214743 | 123227616 |
| chr12 | 123218375 | 123223127 |
| chr12 | 123218375 | 123227616 |
| chr12 | 123221371 | 123223127 |
| chr12 | 123309309 | 123309856 |
| chr12 | 123309309 | 123315660 |
| chr12 | 123313619 | 123315660 |
| chr12 | 123313619 | 123320866 |
| chr12 | 123315372 | 123315660 |
| chr12 | 123315372 | 123320866 |

|       |           |           |
|-------|-----------|-----------|
| chr12 | 123319899 | 123323831 |
| chr12 | 123327425 | 123330509 |
| chr12 | 123327425 | 123331375 |
| chr12 | 123331241 | 123341088 |
| chr12 | 123334052 | 123348133 |
| chr12 | 123345257 | 123350441 |
| chr12 | 123348028 | 123350441 |
| chr12 | 123484179 | 123499536 |
| chr12 | 123586746 | 123590449 |
| chr12 | 123605930 | 123610128 |
| chr12 | 123605930 | 123615316 |
| chr12 | 123605930 | 123616603 |
| chr12 | 123609938 | 123616603 |
| chr12 | 12361205  | 12435785  |
| chr12 | 123616510 | 123617872 |
| chr12 | 123616510 | 123618837 |
| chr12 | 123617757 | 123618837 |
| chr12 | 123630168 | 123630533 |
| chr12 | 123639263 | 123652735 |
| chr12 | 123645454 | 123652735 |
| chr12 | 123673614 | 123679289 |
| chr12 | 123673614 | 123690674 |
| chr12 | 123679188 | 123687035 |
| chr12 | 123688050 | 123690674 |
| chr12 | 123688050 | 123692723 |
| chr12 | 123718622 | 123724791 |
| chr12 | 123718622 | 123735624 |
| chr12 | 123718622 | 123748785 |
| chr12 | 123733925 | 123737271 |
| chr12 | 124347824 | 124348314 |
| chr12 | 124347824 | 124350737 |
| chr12 | 124362125 | 124363799 |
| chr12 | 124372021 | 124385887 |
| chr12 | 124372021 | 124398181 |
| chr12 | 124398118 | 124422555 |
| chr12 | 124398118 | 124430787 |
| chr12 | 124419956 | 124430787 |
| chr12 | 124419956 | 124437996 |
| chr12 | 124419956 | 124449867 |
| chr12 | 124422500 | 124449867 |
| chr12 | 124426621 | 124430787 |
| chr12 | 124426621 | 124437996 |
| chr12 | 124437929 | 124457162 |
| chr12 | 124449814 | 124495368 |
| chr12 | 124466172 | 124473131 |

|       |           |           |
|-------|-----------|-----------|
| chr12 | 124800123 | 124815114 |
| chr12 | 124807760 | 124810289 |
| chr12 | 124807760 | 124817707 |
| chr12 | 124811869 | 124817707 |
| chr12 | 124952397 | 124954211 |
| chr12 | 124956690 | 124957135 |
| chr12 | 124964393 | 124965812 |
| chr12 | 124966792 | 124967218 |
| chr12 | 124968533 | 124968968 |
| chr12 | 124971301 | 124975511 |
| chr12 | 12500518  | 12521463  |
| chr12 | 125073875 | 125086443 |
| chr12 | 125102678 | 125107268 |
| chr12 | 125102678 | 125114557 |
| chr12 | 125102678 | 125118765 |
| chr12 | 12519861  | 12521463  |
| chr12 | 1263033   | 1290012   |
| chr12 | 1263033   | 1371977   |
| chr12 | 12635776  | 12637714  |
| chr12 | 12821207  | 12824677  |
| chr12 | 128799258 | 128801009 |
| chr12 | 128799258 | 128815070 |
| chr12 | 128800853 | 128815070 |
| chr12 | 128808787 | 128815070 |
| chr12 | 1289851   | 1371977   |
| chr12 | 1289851   | 1408247   |
| chr12 | 1289851   | 1444750   |
| chr12 | 130795994 | 130801488 |
| chr12 | 130795994 | 130808704 |
| chr12 | 130801152 | 130827267 |
| chr12 | 130806981 | 130813031 |
| chr12 | 130808630 | 130827267 |
| chr12 | 131714070 | 131725630 |
| chr12 | 131725404 | 131728428 |
| chr12 | 131725404 | 131766308 |
| chr12 | 131753122 | 131766308 |
| chr12 | 131753122 | 131778330 |
| chr12 | 131764455 | 131778330 |
| chr12 | 131764455 | 131786588 |
| chr12 | 131766117 | 131778330 |
| chr12 | 131778064 | 131786588 |
| chr12 | 131838194 | 131841800 |
| chr12 | 131838194 | 131845449 |
| chr12 | 131939172 | 131941983 |
| chr12 | 131981488 | 131982478 |

|       |           |           |
|-------|-----------|-----------|
| chr12 | 131992172 | 132006302 |
| chr12 | 132005076 | 132006302 |
| chr12 | 132005076 | 132006877 |
| chr12 | 132037681 | 132038096 |
| chr12 | 132043303 | 132045900 |
| chr12 | 13211468  | 13213821  |
| chr12 | 132120419 | 132121980 |
| chr12 | 132121439 | 132121980 |
| chr12 | 132140619 | 132141420 |
| chr12 | 132147280 | 132148106 |
| chr12 | 132147280 | 132148895 |
| chr12 | 132150980 | 132151820 |
| chr12 | 132151257 | 132151820 |
| chr12 | 132508152 | 132525823 |
| chr12 | 132508152 | 132527988 |
| chr12 | 132525733 | 132548032 |
| chr12 | 132572287 | 132576931 |
| chr12 | 132572287 | 132581516 |
| chr12 | 132657135 | 132659509 |
| chr12 | 132668810 | 132672322 |
| chr12 | 132679953 | 132681279 |
| chr12 | 132680606 | 132681279 |
| chr12 | 132714857 | 132718120 |
| chr12 | 132734384 | 132735512 |
| chr12 | 132734384 | 132737065 |
| chr12 | 132734384 | 132748331 |
| chr12 | 132734384 | 132755133 |
| chr12 | 132735405 | 132748331 |
| chr12 | 132735405 | 132755133 |
| chr12 | 132741418 | 132748020 |
| chr12 | 132741418 | 132755133 |
| chr12 | 132743153 | 132755133 |
| chr12 | 132747831 | 132755133 |
| chr12 | 132780797 | 132782493 |
| chr12 | 132795851 | 132822311 |
| chr12 | 132804715 | 132822311 |
| chr12 | 132807176 | 132822311 |
| chr12 | 132813306 | 132822311 |
| chr12 | 132932712 | 132933155 |
| chr12 | 132933034 | 132945797 |
| chr12 | 132933034 | 132948270 |
| chr12 | 132945620 | 132948270 |
| chr12 | 133041277 | 133048848 |
| chr12 | 133047954 | 133048848 |
| chr12 | 133083102 | 133083561 |

|       |           |           |
|-------|-----------|-----------|
| chr12 | 133144433 | 133151904 |
| chr12 | 133151027 | 133151904 |
| chr12 | 133191488 | 133192003 |
| chr12 | 1371832   | 1408247   |
| chr12 | 1371832   | 1444750   |
| chr12 | 14423908  | 14438267  |
| chr12 | 14423908  | 14475968  |
| chr12 | 14436105  | 14447053  |
| chr12 | 14446987  | 14457295  |
| chr12 | 14456560  | 14457295  |
| chr12 | 14456560  | 14466590  |
| chr12 | 14475889  | 14481185  |
| chr12 | 15660613  | 15681302  |
| chr12 | 15665755  | 15681302  |
| chr12 | 15669386  | 15670923  |
| chr12 | 15956935  | 15962947  |
| chr12 | 15956935  | 15982436  |
| chr12 | 16721     | 17859     |
| chr12 | 1754257   | 1772961   |
| chr12 | 1754257   | 1778025   |
| chr12 | 1772841   | 1778025   |
| chr12 | 1772841   | 1781076   |
| chr12 | 1777853   | 1784073   |
| chr12 | 19253939  | 19255165  |
| chr12 | 19253939  | 19261021  |
| chr12 | 19253939  | 19265850  |
| chr12 | 19269769  | 19287556  |
| chr12 | 19269769  | 19322667  |
| chr12 | 19320561  | 19322667  |
| chr12 | 19322309  | 19322667  |
| chr12 | 19343322  | 19348519  |
| chr12 | 19345841  | 19359546  |
| chr12 | 19348398  | 19359546  |
| chr12 | 19358227  | 19366109  |
| chr12 | 19361581  | 19366109  |
| chr12 | 19462509  | 19473355  |
| chr12 | 19462509  | 19493986  |
| chr12 | 19462509  | 19500221  |
| chr12 | 19462509  | 19514784  |
| chr12 | 19473247  | 19493986  |
| chr12 | 19473247  | 19500221  |
| chr12 | 19473247  | 19514784  |
| chr12 | 19493799  | 19500221  |
| chr12 | 19493799  | 19518113  |
| chr12 | 19500096  | 19514784  |

|       |          |          |
|-------|----------|----------|
| chr12 | 21304426 | 21318923 |
| chr12 | 21490198 | 21499615 |
| chr12 | 21637070 | 21647016 |
| chr12 | 21646898 | 21654677 |
| chr12 | 22055148 | 22062434 |
| chr12 | 22474750 | 22484888 |
| chr12 | 22478312 | 22493337 |
| chr12 | 22482556 | 22506819 |
| chr12 | 22482556 | 22513379 |
| chr12 | 22482556 | 22518137 |
| chr12 | 22484696 | 22490218 |
| chr12 | 22484696 | 22506819 |
| chr12 | 22484696 | 22513379 |
| chr12 | 22490122 | 22506819 |
| chr12 | 22493222 | 22506819 |
| chr12 | 22506710 | 22518137 |
| chr12 | 22506710 | 22524627 |
| chr12 | 22506710 | 22527892 |
| chr12 | 22506710 | 22544179 |
| chr12 | 22517985 | 22527892 |
| chr12 | 22517985 | 22544179 |
| chr12 | 22523425 | 22527892 |
| chr12 | 22643762 | 22673660 |
| chr12 | 22659013 | 22673660 |
| chr12 | 24829822 | 24836596 |
| chr12 | 24832722 | 24836596 |
| chr12 | 24842081 | 24849949 |
| chr12 | 24878529 | 24894475 |
| chr12 | 24878529 | 24901885 |
| chr12 | 25225613 | 25227412 |
| chr12 | 25225613 | 25245395 |
| chr12 | 26398875 | 26419213 |
| chr12 | 26411319 | 26443650 |
| chr12 | 26415302 | 26443650 |
| chr12 | 26475295 | 26483898 |
| chr12 | 26550246 | 26602706 |
| chr12 | 26578712 | 26658130 |
| chr12 | 26602369 | 26655852 |
| chr12 | 26621122 | 26632059 |
| chr12 | 26628032 | 26655852 |
| chr12 | 26681873 | 26686632 |
| chr12 | 26681873 | 26695650 |
| chr12 | 26681873 | 26716242 |
| chr12 | 26695605 | 26716242 |
| chr12 | 26695605 | 26725765 |

|       |          |          |
|-------|----------|----------|
| chr12 | 26711172 | 26716242 |
| chr12 | 26711172 | 26725765 |
| chr12 | 26715298 | 26725765 |
| chr12 | 26911177 | 26917733 |
| chr12 | 26914407 | 26922700 |
| chr12 | 26916001 | 26917733 |
| chr12 | 26922615 | 26925851 |
| chr12 | 26922615 | 26928905 |
| chr12 | 26924354 | 26928905 |
| chr12 | 26928204 | 26928905 |
| chr12 | 26954144 | 26957743 |
| chr12 | 26979783 | 26982859 |
| chr12 | 26979783 | 26990627 |
| chr12 | 26980565 | 26990627 |
| chr12 | 26980565 | 26999676 |
| chr12 | 26980565 | 27003390 |
| chr12 | 26982772 | 26990627 |
| chr12 | 26982772 | 26999676 |
| chr12 | 26990449 | 26999676 |
| chr12 | 26990449 | 27003390 |
| chr12 | 26995236 | 27003390 |
| chr12 | 26996741 | 26999676 |
| chr12 | 27308338 | 27309197 |
| chr12 | 27314503 | 27315117 |
| chr12 | 27368261 | 27370230 |
| chr12 | 27368261 | 27380404 |
| chr12 | 27368261 | 27385560 |
| chr12 | 27368261 | 27387320 |
| chr12 | 27368261 | 27390239 |
| chr12 | 27368261 | 27403541 |
| chr12 | 27368261 | 27418196 |
| chr12 | 27376345 | 27385560 |
| chr12 | 27376345 | 27390239 |
| chr12 | 27380246 | 27390239 |
| chr12 | 27400533 | 27403541 |
| chr12 | 27400533 | 27418196 |
| chr12 | 27633361 | 27635115 |
| chr12 | 27650009 | 27656730 |
| chr12 | 27650009 | 27667320 |
| chr12 | 27650009 | 27671546 |
| chr12 | 27660883 | 27671546 |
| chr12 | 27676427 | 27687507 |
| chr12 | 27681545 | 27691928 |
| chr12 | 27714779 | 27724186 |
| chr12 | 27714779 | 27735556 |



|       |          |          |
|-------|----------|----------|
| chr12 | 27714779 | 27737608 |
| chr12 | 27719807 | 27724186 |
| chr12 | 2797728  | 2800577  |
| chr12 | 2817222  | 2818277  |
| chr12 | 2820085  | 2821792  |
| chr12 | 2821691  | 2824252  |
| chr12 | 2822793  | 2824252  |
| chr12 | 28305648 | 28307749 |
| chr12 | 28305648 | 28362515 |
| chr12 | 28305648 | 28391411 |
| chr12 | 28362437 | 28391411 |
| chr12 | 28362437 | 28452654 |
| chr12 | 2864319  | 2866521  |
| chr12 | 2866392  | 2868754  |
| chr12 | 2909528  | 2922402  |
| chr12 | 2920762  | 2922402  |
| chr12 | 2920762  | 2934561  |
| chr12 | 2933417  | 2938285  |
| chr12 | 29345442 | 29361685 |
| chr12 | 2994737  | 3012232  |
| chr12 | 2994737  | 3022017  |
| chr12 | 3017397  | 3022017  |
| chr12 | 30649136 | 30666251 |
| chr12 | 30661140 | 30663654 |
| chr12 | 30661140 | 30665309 |
| chr12 | 30661140 | 30666251 |
| chr12 | 30665219 | 30666251 |
| chr12 | 30665219 | 30669282 |
| chr12 | 30669182 | 30690577 |
| chr12 | 30673989 | 30684457 |
| chr12 | 30673989 | 30690577 |
| chr12 | 30676497 | 30684457 |
| chr12 | 30711565 | 30716676 |
| chr12 | 30713784 | 30724451 |
| chr12 | 30723258 | 30726088 |
| chr12 | 30723258 | 30751133 |
| chr12 | 30728647 | 30741106 |
| chr12 | 30728647 | 30751133 |
| chr12 | 30730238 | 30741106 |
| chr12 | 30734967 | 30741106 |
| chr12 | 31287633 | 31298224 |
| chr12 | 31293804 | 31298224 |
| chr12 | 31295233 | 31305123 |
| chr12 | 31389323 | 31402643 |
| chr12 | 31389323 | 31409384 |

|       |          |          |
|-------|----------|----------|
| chr12 | 31392266 | 31392696 |
| chr12 | 31398174 | 31409384 |
| chr12 | 31398174 | 31415448 |
| chr12 | 31409262 | 31415448 |
| chr12 | 31413435 | 31426424 |
| chr12 | 31413435 | 31433248 |
| chr12 | 31413435 | 31447769 |
| chr12 | 31415366 | 31426424 |
| chr12 | 31415366 | 31433248 |
| chr12 | 31415366 | 31442925 |
| chr12 | 31423596 | 31424687 |
| chr12 | 31423596 | 31426424 |
| chr12 | 31423596 | 31433248 |
| chr12 | 31426292 | 31447769 |
| chr12 | 31433154 | 31447769 |
| chr12 | 31442774 | 31447769 |
| chr12 | 31442774 | 31452476 |
| chr12 | 31451939 | 31460381 |
| chr12 | 31451939 | 31499671 |
| chr12 | 31460193 | 31499671 |
| chr12 | 31479588 | 31499671 |
| chr12 | 31689006 | 31702007 |
| chr12 | 31689006 | 31709425 |
| chr12 | 31689006 | 31719356 |
| chr12 | 31714881 | 31719356 |
| chr12 | 32293993 | 32306122 |
| chr12 | 32293993 | 32337706 |
| chr12 | 32334515 | 32338979 |
| chr12 | 32564136 | 32611283 |
| chr12 | 32576265 | 32611283 |
| chr12 | 32581959 | 32611283 |
| chr12 | 32581959 | 32625779 |
| chr12 | 32598496 | 32601423 |
| chr12 | 32598496 | 32602317 |
| chr12 | 32598496 | 32611283 |
| chr12 | 32598496 | 32619870 |
| chr12 | 32598496 | 32625779 |
| chr12 | 32607956 | 32611283 |
| chr12 | 32625653 | 32633689 |
| chr12 | 32707366 | 32713371 |
| chr12 | 32708152 | 32713371 |
| chr12 | 32708152 | 32718763 |
| chr12 | 32710928 | 32713371 |
| chr12 | 32710928 | 32718763 |
| chr12 | 32710928 | 32722633 |

|       |          |          |
|-------|----------|----------|
| chr12 | 32713208 | 32718763 |
| chr12 | 32713208 | 32722633 |
| chr12 | 32718642 | 32722633 |
| chr12 | 32718642 | 32733807 |
| chr12 | 333486   | 334422   |
| chr12 | 350620   | 352324   |
| chr12 | 350620   | 354234   |
| chr12 | 350620   | 356537   |
| chr12 | 350620   | 366104   |
| chr12 | 352204   | 354234   |
| chr12 | 355157   | 363097   |
| chr12 | 38675716 | 38702921 |
| chr12 | 38693656 | 38730358 |
| chr12 | 38730282 | 38776301 |
| chr12 | 38760846 | 38776301 |
| chr12 | 38760846 | 38839955 |
| chr12 | 38760846 | 38848662 |
| chr12 | 38829378 | 38848662 |
| chr12 | 38829378 | 38874511 |
| chr12 | 38839915 | 38874511 |
| chr12 | 39301479 | 39318201 |
| chr12 | 39366349 | 39370261 |
| chr12 | 39864761 | 39871961 |
| chr12 | 40028300 | 40048210 |
| chr12 | 40346752 | 40348509 |
| chr12 | 409367   | 418636   |
| chr12 | 42317339 | 42324104 |
| chr12 | 42335882 | 42375074 |
| chr12 | 42351884 | 42387535 |
| chr12 | 42351884 | 42398994 |
| chr12 | 42355160 | 42375074 |
| chr12 | 42355160 | 42387535 |
| chr12 | 42355160 | 42393689 |
| chr12 | 42355160 | 42398994 |
| chr12 | 42374862 | 42387535 |
| chr12 | 42374862 | 42393689 |
| chr12 | 42374862 | 42398994 |
| chr12 | 42384939 | 42398994 |
| chr12 | 42387455 | 42398994 |
| chr12 | 42393569 | 42398994 |
| chr12 | 428768   | 438554   |
| chr12 | 43452273 | 43454052 |
| chr12 | 43742456 | 43748609 |
| chr12 | 44143524 | 44211387 |
| chr12 | 4500137  | 4518880  |

|       |          |          |
|-------|----------|----------|
| chr12 | 4517060  | 4518880  |
| chr12 | 4517060  | 4525583  |
| chr12 | 4518773  | 4534302  |
| chr12 | 45302013 | 45331423 |
| chr12 | 45331294 | 45348315 |
| chr12 | 45331294 | 45357424 |
| chr12 | 45367687 | 45390498 |
| chr12 | 45367687 | 45409487 |
| chr12 | 45378052 | 45390498 |
| chr12 | 45416698 | 45423062 |
| chr12 | 45421070 | 45423062 |
| chr12 | 45731216 | 45821487 |
| chr12 | 45811417 | 45860949 |
| chr12 | 45836588 | 45839496 |
| chr12 | 45860800 | 45893721 |
| chr12 | 45891779 | 45893721 |
| chr12 | 45931505 | 45934285 |
| chr12 | 45931505 | 45934505 |
| chr12 | 45931505 | 45951727 |
| chr12 | 45945248 | 45951727 |
| chr12 | 45945248 | 45964188 |
| chr12 | 46197719 | 46198743 |
| chr12 | 46197719 | 46229639 |
| chr12 | 46197918 | 46204590 |
| chr12 | 46206079 | 46229268 |
| chr12 | 46229152 | 46229639 |
| chr12 | 46229152 | 46239893 |
| chr12 | 46229152 | 46243314 |
| chr12 | 46229152 | 46254936 |
| chr12 | 46239678 | 46243314 |
| chr12 | 46239678 | 46254936 |
| chr12 | 46364643 | 46367340 |
| chr12 | 46366863 | 46370857 |
| chr12 | 46370775 | 46371379 |
| chr12 | 4657747  | 4685325  |
| chr12 | 47666979 | 47670345 |
| chr12 | 47865046 | 47882774 |
| chr12 | 48063709 | 48074793 |
| chr12 | 48071666 | 48074793 |
| chr12 | 48071666 | 48096427 |
| chr12 | 48074323 | 48074793 |
| chr12 | 48083590 | 48098124 |
| chr12 | 48083590 | 48101516 |
| chr12 | 48088800 | 48098124 |
| chr12 | 48088800 | 48101516 |

|       |          |          |
|-------|----------|----------|
| chr12 | 48096342 | 48098124 |
| chr12 | 48096342 | 48101516 |
| chr12 | 48151200 | 48153529 |
| chr12 | 48679035 | 48681641 |
| chr12 | 48695998 | 48705896 |
| chr12 | 48833276 | 48834497 |
| chr12 | 48837280 | 48837657 |
| chr12 | 48843939 | 48845782 |
| chr12 | 48939654 | 48941188 |
| chr12 | 49030600 | 49031033 |
| chr12 | 49042740 | 49048769 |
| chr12 | 49100387 | 49107045 |
| chr12 | 49269464 | 49269976 |
| chr12 | 49328926 | 49329454 |
| chr12 | 49371227 | 49490731 |
| chr12 | 49460769 | 49489573 |
| chr12 | 49460769 | 49490731 |
| chr12 | 49484589 | 49490731 |
| chr12 | 49494740 | 49500205 |
| chr12 | 49496832 | 49500205 |
| chr12 | 49496832 | 49514613 |
| chr12 | 49656403 | 49657190 |
| chr12 | 49656403 | 49658594 |
| chr12 | 49661965 | 49668554 |
| chr12 | 49665831 | 49668554 |
| chr12 | 49752463 | 49755755 |
| chr12 | 49752463 | 49759321 |
| chr12 | 49991997 | 49992655 |
| chr12 | 49991997 | 50002300 |
| chr12 | 49999140 | 49999733 |
| chr12 | 49999140 | 50002300 |
| chr12 | 49999140 | 50005392 |
| chr12 | 50004234 | 50006636 |
| chr12 | 50004234 | 50016719 |
| chr12 | 50016630 | 50018589 |
| chr12 | 50094436 | 50096972 |
| chr12 | 50427761 | 50429090 |
| chr12 | 50427761 | 50430570 |
| chr12 | 50427761 | 50435624 |
| chr12 | 50427761 | 50437838 |
| chr12 | 50427761 | 50441643 |
| chr12 | 50427761 | 50454417 |
| chr12 | 50427761 | 50461347 |
| chr12 | 50427764 | 50429090 |
| chr12 | 50427764 | 50430570 |

|       |          |          |
|-------|----------|----------|
| chr12 | 50427764 | 50454417 |
| chr12 | 50427764 | 50461347 |
| chr12 | 50430494 | 50437838 |
| chr12 | 50430494 | 50441643 |
| chr12 | 50430494 | 50454417 |
| chr12 | 50435487 | 50441643 |
| chr12 | 50435487 | 50454417 |
| chr12 | 50437734 | 50441643 |
| chr12 | 50437734 | 50454417 |
| chr12 | 50453459 | 50454417 |
| chr12 | 50453459 | 50461347 |
| chr12 | 50453459 | 50467120 |
| chr12 | 50454313 | 50461347 |
| chr12 | 50454313 | 50467120 |
| chr12 | 50461134 | 50467120 |
| chr12 | 50461134 | 50474167 |
| chr12 | 50462581 | 50474167 |
| chr12 | 50466958 | 50474167 |
| chr12 | 50625975 | 50660319 |
| chr12 | 50671185 | 50674629 |
| chr12 | 50671185 | 50686682 |
| chr12 | 50685832 | 50686682 |
| chr12 | 50685832 | 50697175 |
| chr12 | 50692948 | 50697175 |
| chr12 | 50692948 | 50699202 |
| chr12 | 50780139 | 50814439 |
| chr12 | 50814009 | 50814439 |
| chr12 | 50996816 | 51010766 |
| chr12 | 50999173 | 51010766 |
| chr12 | 51004787 | 51010766 |
| chr12 | 51049033 | 51056502 |
| chr12 | 51049033 | 51058128 |
| chr12 | 51053777 | 51056502 |
| chr12 | 51055834 | 51056502 |
| chr12 | 51055834 | 51058128 |
| chr12 | 51073822 | 51076647 |
| chr12 | 51099654 | 51104203 |
| chr12 | 51101934 | 51104203 |
| chr12 | 51109120 | 51116420 |
| chr12 | 51110876 | 51117747 |
| chr12 | 51116314 | 51117747 |
| chr12 | 51116314 | 51118772 |
| chr12 | 51240342 | 51241116 |
| chr12 | 51359131 | 51365579 |
| chr12 | 51452123 | 51453699 |

|       |          |          |
|-------|----------|----------|
| chr12 | 51662763 | 51687219 |
| chr12 | 51684173 | 51687219 |
| chr12 | 51684173 | 51688849 |
| chr12 | 51684173 | 51702914 |
| chr12 | 51699569 | 51721908 |
| chr12 | 51701143 | 51702914 |
| chr12 | 51786541 | 51794641 |
| chr12 | 51975264 | 51991993 |
| chr12 | 51980968 | 51986942 |
| chr12 | 51986817 | 51991993 |
| chr12 | 52172197 | 52185587 |
| chr12 | 52180512 | 52185587 |
| chr12 | 52235154 | 52237569 |
| chr12 | 52950327 | 52952342 |
| chr12 | 53016472 | 53019006 |
| chr12 | 53016472 | 53020026 |
| chr12 | 53016472 | 53022627 |
| chr12 | 53016472 | 53028188 |
| chr12 | 53016472 | 53034709 |
| chr12 | 53018797 | 53020026 |
| chr12 | 53018797 | 53022627 |
| chr12 | 53019909 | 53022627 |
| chr12 | 53019909 | 53028188 |
| chr12 | 53021805 | 53028188 |
| chr12 | 53027781 | 53028188 |
| chr12 | 53033805 | 53037622 |
| chr12 | 53033805 | 53038411 |
| chr12 | 53037408 | 53038411 |
| chr12 | 53287971 | 53291860 |
| chr12 | 53297849 | 53298150 |
| chr12 | 53406584 | 53409561 |
| chr12 | 53454725 | 53471807 |
| chr12 | 53455884 | 53461143 |
| chr12 | 53459271 | 53471807 |
| chr12 | 53461014 | 53471807 |
| chr12 | 53462492 | 53471807 |
| chr12 | 53502014 | 53504469 |
| chr12 | 53523275 | 53552637 |
| chr12 | 53669147 | 53669948 |
| chr12 | 54342205 | 54348051 |
| chr12 | 54343224 | 54348051 |
| chr12 | 55789074 | 55796076 |
| chr12 | 55789074 | 55800900 |
| chr12 | 55789074 | 55803728 |
| chr12 | 55796024 | 55803728 |

|       |          |          |
|-------|----------|----------|
| chr12 | 55800561 | 55803728 |
| chr12 | 56002211 | 56002720 |
| chr12 | 56086530 | 56088868 |
| chr12 | 56133416 | 56134428 |
| chr12 | 56133587 | 56134428 |
| chr12 | 56158683 | 56160320 |
| chr12 | 56169528 | 56170208 |
| chr12 | 56169775 | 56174764 |
| chr12 | 56210296 | 56214070 |
| chr12 | 56224833 | 56226419 |
| chr12 | 56252014 | 56254952 |
| chr12 | 56274776 | 56282991 |
| chr12 | 56275995 | 56282991 |
| chr12 | 56282419 | 56282991 |
| chr12 | 56282419 | 56286645 |
| chr12 | 56314850 | 56315242 |
| chr12 | 56326312 | 56328358 |
| chr12 | 56348528 | 56349636 |
| chr12 | 56430880 | 56432524 |
| chr12 | 56433025 | 56434231 |
| chr12 | 56433380 | 56434231 |
| chr12 | 56562416 | 56571855 |
| chr12 | 56562416 | 56586926 |
| chr12 | 56568974 | 56571855 |
| chr12 | 56581183 | 56582152 |
| chr12 | 56603358 | 56605327 |
| chr12 | 56609735 | 56612246 |
| chr12 | 56613952 | 56617532 |
| chr12 | 56639105 | 56640192 |
| chr12 | 56642457 | 56643958 |
| chr12 | 56644780 | 56645353 |
| chr12 | 56666203 | 56670364 |
| chr12 | 56666203 | 56673065 |
| chr12 | 56670274 | 56673065 |
| chr12 | 56671748 | 56673065 |
| chr12 | 56741434 | 56744123 |
| chr12 | 56746044 | 56751195 |
| chr12 | 56746780 | 56751195 |
| chr12 | 57069233 | 57072912 |
| chr12 | 57211926 | 57212261 |
| chr12 | 57230802 | 57234110 |
| chr12 | 57289008 | 57296551 |
| chr12 | 57298089 | 57310463 |
| chr12 | 57299351 | 57310463 |
| chr12 | 57489895 | 57498623 |



|       |          |          |
|-------|----------|----------|
| chr12 | 57498156 | 57498623 |
| chr12 | 57498156 | 57500522 |
| chr12 | 57498156 | 57504299 |
| chr12 | 57524028 | 57529009 |
| chr12 | 57533952 | 57534452 |
| chr12 | 57535055 | 57535845 |
| chr12 | 57696274 | 57715970 |
| chr12 | 57749181 | 57749504 |
| chr12 | 57783109 | 57787162 |
| chr12 | 57786162 | 57787162 |
| chr12 | 57945627 | 57953689 |
| chr12 | 57946994 | 57953689 |
| chr12 | 62325871 | 62355475 |
| chr12 | 62349220 | 62355475 |
| chr12 | 62381489 | 62384302 |
| chr12 | 62470700 | 62501698 |
| chr12 | 62484169 | 62495147 |
| chr12 | 62484169 | 62499048 |
| chr12 | 62484169 | 62501698 |
| chr12 | 62484169 | 62508480 |
| chr12 | 62493914 | 62508480 |
| chr12 | 62498918 | 62501698 |
| chr12 | 62498918 | 62526102 |
| chr12 | 62500782 | 62508480 |
| chr12 | 62501572 | 62508480 |
| chr12 | 62535524 | 62543198 |
| chr12 | 62535524 | 62556192 |
| chr12 | 62543096 | 62553174 |
| chr12 | 62549667 | 62553174 |
| chr12 | 62555993 | 62571582 |
| chr12 | 62565236 | 62585501 |
| chr12 | 62580296 | 62588156 |
| chr12 | 62689698 | 62720289 |
| chr12 | 62801815 | 62832279 |
| chr12 | 6333068  | 6334244  |
| chr12 | 63597808 | 63663845 |
| chr12 | 63608615 | 63621337 |
| chr12 | 63617303 | 63647365 |
| chr12 | 63624039 | 63663845 |
| chr12 | 63626468 | 63647365 |
| chr12 | 63644402 | 63647365 |
| chr12 | 63644402 | 63661481 |
| chr12 | 63644402 | 63663845 |
| chr12 | 63781018 | 63805404 |
| chr12 | 63983946 | 64017012 |

|       |          |          |
|-------|----------|----------|
| chr12 | 64016949 | 64043575 |
| chr12 | 64016949 | 64065219 |
| chr12 | 64016949 | 64080370 |
| chr12 | 64042789 | 64043575 |
| chr12 | 64062916 | 64065219 |
| chr12 | 64062916 | 64087026 |
| chr12 | 64062916 | 64097375 |
| chr12 | 64080285 | 64115893 |
| chr12 | 64091275 | 64097375 |
| chr12 | 64091275 | 64115893 |
| chr12 | 64108931 | 64115893 |
| chr12 | 64409961 | 64419094 |
| chr12 | 64409961 | 64420254 |
| chr12 | 64409961 | 64420521 |
| chr12 | 64418045 | 64419094 |
| chr12 | 64418045 | 64420521 |
| chr12 | 64423004 | 64431823 |
| chr12 | 64455839 | 64467082 |
| chr12 | 64466900 | 64474390 |
| chr12 | 64466900 | 64490119 |
| chr12 | 6446960  | 6448737  |
| chr12 | 64480011 | 64486017 |
| chr12 | 64480011 | 64490119 |
| chr12 | 64484302 | 64486017 |
| chr12 | 64485454 | 64486017 |
| chr12 | 64495482 | 64496406 |
| chr12 | 64688215 | 64691579 |
| chr12 | 64728955 | 64737107 |
| chr12 | 6509716  | 6511252  |
| chr12 | 6514264  | 6514920  |
| chr12 | 6520985  | 6522037  |
| chr12 | 65210925 | 65241087 |
| chr12 | 6521797  | 6523346  |
| chr12 | 6522827  | 6523346  |
| chr12 | 65238501 | 65238814 |
| chr12 | 65238501 | 65241087 |
| chr12 | 6526447  | 6527888  |
| chr12 | 65306862 | 65308655 |
| chr12 | 65306862 | 65328603 |
| chr12 | 65306862 | 65369026 |
| chr12 | 65308528 | 65328603 |
| chr12 | 65308528 | 65369026 |
| chr12 | 65326825 | 65369026 |
| chr12 | 6534809  | 6537216  |
| chr12 | 6536683  | 6537216  |

|       |          |          |
|-------|----------|----------|
| chr12 | 6560097  | 6566822  |
| chr12 | 6563314  | 6563946  |
| chr12 | 6594458  | 6595430  |
| chr12 | 66145840 | 66153448 |
| chr12 | 66371693 | 66377285 |
| chr12 | 66432547 | 66596927 |
| chr12 | 66515618 | 66529914 |
| chr12 | 66515618 | 66541950 |
| chr12 | 66529830 | 66596927 |
| chr12 | 6670759  | 6688226  |
| chr12 | 6678945  | 6688226  |
| chr12 | 67281909 | 67299095 |
| chr12 | 6730401  | 6730820  |
| chr12 | 6749847  | 6750766  |
| chr12 | 68302619 | 68325575 |
| chr12 | 6833591  | 6834049  |
| chr12 | 6842969  | 6845802  |
| chr12 | 6855754  | 6856150  |
| chr12 | 68648698 | 68654252 |
| chr12 | 68648698 | 68657217 |
| chr12 | 68650399 | 68654252 |
| chr12 | 68654111 | 68657217 |
| chr12 | 68690630 | 68696922 |
| chr12 | 68690630 | 68700853 |
| chr12 | 68690630 | 68702784 |
| chr12 | 6869257  | 6869773  |
| chr12 | 6869257  | 6870136  |
| chr12 | 68696818 | 68702784 |
| chr12 | 68696818 | 68715740 |
| chr12 | 68702735 | 68710093 |
| chr12 | 68709237 | 68715740 |
| chr12 | 68710004 | 68715740 |
| chr12 | 68710004 | 68725796 |
| chr12 | 68715626 | 68721986 |
| chr12 | 68715626 | 68722152 |
| chr12 | 68715626 | 68725796 |
| chr12 | 68715626 | 68727389 |
| chr12 | 68715626 | 68731719 |
| chr12 | 68715626 | 68732739 |
| chr12 | 68719340 | 68722152 |
| chr12 | 68731109 | 68731719 |
| chr12 | 68747929 | 68752190 |
| chr12 | 68816811 | 68824651 |
| chr12 | 68816811 | 68828931 |
| chr12 | 68820324 | 68824651 |

|       |          |          |
|-------|----------|----------|
| chr12 | 68824362 | 68828931 |
| chr12 | 68828770 | 68836749 |
| chr12 | 68866895 | 68871956 |
| chr12 | 6905584  | 6906662  |
| chr12 | 69251128 | 69253154 |
| chr12 | 69251128 | 69260197 |
| chr12 | 69251128 | 69262562 |
| chr12 | 69253050 | 69262562 |
| chr12 | 69256696 | 69262562 |
| chr12 | 69260043 | 69262562 |
| chr12 | 69362787 | 69370975 |
| chr12 | 69365632 | 69370975 |
| chr12 | 69365789 | 69370975 |
| chr12 | 69586752 | 69588262 |
| chr12 | 69589484 | 69592159 |
| chr12 | 69589484 | 69593613 |
| chr12 | 69592058 | 69593613 |
| chr12 | 69597155 | 69598421 |
| chr12 | 6974338  | 6974693  |
| chr12 | 6974338  | 6975378  |
| chr12 | 69755383 | 69756663 |
| chr12 | 69784719 | 69795344 |
| chr12 | 69800208 | 69801721 |
| chr12 | 70278131 | 70311017 |
| chr12 | 70278131 | 70319364 |
| chr12 | 70294070 | 70311017 |
| chr12 | 70319297 | 70330469 |
| chr12 | 70329422 | 70332846 |
| chr12 | 70329422 | 70346324 |
| chr12 | 70342106 | 70346324 |
| chr12 | 7064266  | 7065299  |
| chr12 | 7099685  | 7102087  |
| chr12 | 7142868  | 7143311  |
| chr12 | 71614534 | 71615316 |
| chr12 | 71619314 | 71620124 |
| chr12 | 71623359 | 71624292 |
| chr12 | 71626259 | 71629037 |
| chr12 | 71630822 | 71634825 |
| chr12 | 71632885 | 71633438 |
| chr12 | 71634154 | 71642559 |
| chr12 | 71634703 | 71636654 |
| chr12 | 71642435 | 71644318 |
| chr12 | 71689590 | 71699109 |
| chr12 | 71769799 | 71774022 |
| chr12 | 71769799 | 71782658 |

|       |          |          |
|-------|----------|----------|
| chr12 | 72286680 | 72378121 |
| chr12 | 72469757 | 72499635 |
| chr12 | 72562164 | 72575542 |
| chr12 | 72562164 | 72621751 |
| chr12 | 72562852 | 72575542 |
| chr12 | 72618890 | 72621751 |
| chr12 | 7367235  | 7379298  |
| chr12 | 7373319  | 7433694  |
| chr12 | 7403534  | 7433694  |
| chr12 | 7432415  | 7433694  |
| chr12 | 75312847 | 75326527 |
| chr12 | 76049755 | 76074239 |
| chr12 | 76053090 | 76053909 |
| chr12 | 76053090 | 76056161 |
| chr12 | 76053769 | 76056161 |
| chr12 | 76055018 | 76056161 |
| chr12 | 76055018 | 76060279 |
| chr12 | 76056032 | 76074239 |
| chr12 | 76059797 | 76060279 |
| chr12 | 76059797 | 76068994 |
| chr12 | 76059797 | 76074239 |
| chr12 | 76060137 | 76068994 |
| chr12 | 76060137 | 76074239 |
| chr12 | 76067370 | 76068994 |
| chr12 | 76067370 | 76074239 |
| chr12 | 76450850 | 76487618 |
| chr12 | 76797433 | 76822531 |
| chr12 | 76805316 | 76809857 |
| chr12 | 76805316 | 76822531 |
| chr12 | 76826907 | 76842981 |
| chr12 | 76845708 | 76849470 |
| chr12 | 77043064 | 77056130 |
| chr12 | 77055854 | 77064635 |
| chr12 | 77940318 | 77941133 |
| chr12 | 77940318 | 77968702 |
| chr12 | 77940318 | 77998476 |
| chr12 | 77940318 | 78007445 |
| chr12 | 77940318 | 78021862 |
| chr12 | 77940318 | 78059115 |
| chr12 | 77966228 | 77968702 |
| chr12 | 77966228 | 78007445 |
| chr12 | 77994802 | 78021862 |
| chr12 | 77998336 | 78021862 |
| chr12 | 78006418 | 78021862 |
| chr12 | 78021746 | 78059115 |

|       |          |          |
|-------|----------|----------|
| chr12 | 78049992 | 78059115 |
| chr12 | 78116771 | 78118297 |
| chr12 | 78121939 | 78140334 |
| chr12 | 78128705 | 78137365 |
| chr12 | 78128705 | 78159286 |
| chr12 | 78137176 | 78168866 |
| chr12 | 78159202 | 78168866 |
| chr12 | 78159202 | 78181045 |
| chr12 | 78175305 | 78181045 |
| chr12 | 78175305 | 78190219 |
| chr12 | 78185600 | 78190219 |
| chr12 | 79613574 | 79621207 |
| chr12 | 79786373 | 79788783 |
| chr12 | 79807225 | 79810010 |
| chr12 | 79817393 | 79822190 |
| chr12 | 79817393 | 79828464 |
| chr12 | 79821077 | 79828464 |
| chr12 | 79828319 | 79845420 |
| chr12 | 79828319 | 79872938 |
| chr12 | 79845301 | 79872938 |
| chr12 | 8089935  | 8090299  |
| chr12 | 8092675  | 8095703  |
| chr12 | 813641   | 830160   |
| chr12 | 813641   | 861343   |
| chr12 | 82386802 | 82389922 |
| chr12 | 82386802 | 82403130 |
| chr12 | 82402982 | 82438791 |
| chr12 | 82430892 | 82456820 |
| chr12 | 827041   | 830160   |
| chr12 | 82965023 | 82966997 |
| chr12 | 82965023 | 82986046 |
| chr12 | 84872601 | 84884040 |
| chr12 | 84872601 | 84892308 |
| chr12 | 84883858 | 84892308 |
| chr12 | 84885434 | 84886068 |
| chr12 | 85065261 | 85066898 |
| chr12 | 8713810  | 8754093  |
| chr12 | 8713810  | 8780739  |
| chr12 | 8749861  | 8754093  |
| chr12 | 88106674 | 88107098 |
| chr12 | 88139144 | 88141334 |
| chr12 | 88148287 | 88174727 |
| chr12 | 88148287 | 88176319 |
| chr12 | 88148287 | 88190622 |
| chr12 | 88160113 | 88172745 |

|       |          |          |
|-------|----------|----------|
| chr12 | 88160113 | 88176319 |
| chr12 | 88160113 | 88188946 |
| chr12 | 882942   | 883831   |
| chr12 | 8920984  | 8921750  |
| chr12 | 8943404  | 8943910  |
| chr12 | 894561   | 897681   |
| chr12 | 89459637 | 89466922 |
| chr12 | 89459637 | 89467685 |
| chr12 | 89459637 | 89472275 |
| chr12 | 89459637 | 89492115 |
| chr12 | 89466769 | 89472275 |
| chr12 | 89466769 | 89497342 |
| chr12 | 89470360 | 89472275 |
| chr12 | 89491935 | 89497342 |
| chr12 | 89603042 | 89604346 |
| chr12 | 89609936 | 89617039 |
| chr12 | 916343   | 927263   |
| chr12 | 925449   | 930144   |
| chr12 | 925449   | 933076   |
| chr12 | 92809016 | 92811434 |
| chr12 | 92826165 | 92853025 |
| chr12 | 92827911 | 92853025 |
| chr12 | 92842464 | 92864987 |
| chr12 | 92842464 | 92891721 |
| chr12 | 92851110 | 92853025 |
| chr12 | 92851110 | 92853954 |
| chr12 | 929763   | 930144   |
| chr12 | 93469188 | 93487660 |
| chr12 | 93469191 | 93487660 |
| chr12 | 93476953 | 93487660 |
| chr12 | 9424527  | 9427865  |
| chr12 | 94331699 | 94367943 |
| chr12 | 94375885 | 94403262 |
| chr12 | 94400849 | 94403262 |
| chr12 | 94400849 | 94412591 |
| chr12 | 94578393 | 94582538 |
| chr12 | 95025149 | 95040597 |
| chr12 | 95028386 | 95051943 |
| chr12 | 95028386 | 95057643 |
| chr12 | 95031348 | 95057878 |
| chr12 | 95040475 | 95049233 |
| chr12 | 95057552 | 95057878 |
| chr12 | 95152810 | 95172744 |
| chr12 | 95257149 | 95274889 |
| chr12 | 95266356 | 95287857 |

|       |           |           |
|-------|-----------|-----------|
| chr12 | 95270038  | 95282644  |
| chr12 | 95294271  | 95296258  |
| chr12 | 95485878  | 95504161  |
| chr12 | 95494055  | 95496098  |
| chr12 | 95494055  | 95504161  |
| chr12 | 95494055  | 95511998  |
| chr12 | 95494956  | 95504161  |
| chr12 | 96002959  | 96017580  |
| chr12 | 96018762  | 96019240  |
| chr12 | 96018762  | 96024547  |
| chr12 | 96280807  | 96300360  |
| chr12 | 96282508  | 96297721  |
| chr12 | 96282508  | 96334865  |
| chr12 | 96289166  | 96313454  |
| chr12 | 96294998  | 96298983  |
| chr12 | 96297626  | 96298983  |
| chr12 | 96297626  | 96334865  |
| chr12 | 96298868  | 96300360  |
| chr12 | 96311051  | 96324112  |
| chr12 | 96311051  | 96334865  |
| chr12 | 96323947  | 96334865  |
| chr12 | 96909751  | 96917737  |
| chr12 | 96909751  | 96920125  |
| chr12 | 96909751  | 96936812  |
| chr12 | 96934975  | 96945849  |
| chr12 | 98527885  | 98531838  |
| chr12 | 98527885  | 98537572  |
| chr12 | 98527885  | 98546447  |
| chr12 | 98544229  | 98544537  |
| chr12 | 98595726  | 98598035  |
| chr12 | 98597855  | 98598703  |
| chr12 | 98648318  | 98649684  |
| chr12 | 98662455  | 98662806  |
| chr12 | 98677424  | 98699569  |
| chr12 | 99655066  | 99782097  |
| chr12 | 99772921  | 99782097  |
| chr12 | 99772921  | 99806700  |
| chr12 | 99772921  | 99812311  |
| chr12 | 99772921  | 99825389  |
| chr12 | 99806403  | 99825389  |
| chr13 | 100209331 | 100368574 |
| chr13 | 100257594 | 100273346 |
| chr13 | 100257594 | 100309908 |
| chr13 | 100257594 | 100340259 |
| chr13 | 100257594 | 100449305 |



|       |           |           |
|-------|-----------|-----------|
| chr13 | 100262728 | 100309908 |
| chr13 | 100262728 | 100368574 |
| chr13 | 100268688 | 100273346 |
| chr13 | 100273195 | 100309908 |
| chr13 | 100301459 | 100309908 |
| chr13 | 100301459 | 100340259 |
| chr13 | 100301459 | 100368574 |
| chr13 | 100301459 | 100449305 |
| chr13 | 100302923 | 100330671 |
| chr13 | 100309832 | 100368574 |
| chr13 | 100330560 | 100340259 |
| chr13 | 100330560 | 100368574 |
| chr13 | 100642210 | 100670569 |
| chr13 | 100656380 | 100670569 |
| chr13 | 101567698 | 101583356 |
| chr13 | 102604792 | 102618846 |
| chr13 | 102622876 | 102627166 |
| chr13 | 102622876 | 102627924 |
| chr13 | 102627011 | 102640376 |
| chr13 | 102768259 | 102770086 |
| chr13 | 102807145 | 102822159 |
| chr13 | 102807145 | 102834552 |
| chr13 | 102816427 | 102822159 |
| chr13 | 102821036 | 102831697 |
| chr13 | 102821036 | 102834552 |
| chr13 | 102821742 | 102831697 |
| chr13 | 110207402 | 110211922 |
| chr13 | 110429884 | 110501784 |
| chr13 | 110622215 | 110624279 |
| chr13 | 110622215 | 110627547 |
| chr13 | 110634544 | 110635588 |
| chr13 | 110651033 | 110683134 |
| chr13 | 110651033 | 110705571 |
| chr13 | 110663450 | 110705571 |
| chr13 | 110683050 | 110701555 |
| chr13 | 110687720 | 110705571 |
| chr13 | 111153904 | 111244294 |
| chr13 | 111205288 | 111217880 |
| chr13 | 111205288 | 111233293 |
| chr13 | 111209871 | 111233293 |
| chr13 | 111209871 | 111244294 |
| chr13 | 111217678 | 111233293 |
| chr13 | 111217678 | 111244294 |
| chr13 | 111243871 | 111267670 |
| chr13 | 112504031 | 112527484 |

|       |           |           |
|-------|-----------|-----------|
| chr13 | 112516439 | 112527484 |
| chr13 | 112516439 | 112545865 |
| chr13 | 112518974 | 112527484 |
| chr13 | 112554056 | 112559399 |
| chr13 | 112804956 | 112816211 |
| chr13 | 112804956 | 112819407 |
| chr13 | 112823344 | 112851218 |
| chr13 | 112831374 | 112842379 |
| chr13 | 112834588 | 112842379 |
| chr13 | 112842275 | 112854530 |
| chr13 | 113184345 | 113190975 |
| chr13 | 113190871 | 113200516 |
| chr13 | 113242967 | 113245237 |
| chr13 | 113474123 | 113484056 |
| chr13 | 113495501 | 113503588 |
| chr13 | 113495501 | 113510424 |
| chr13 | 113495501 | 113520733 |
| chr13 | 113503495 | 113520733 |
| chr13 | 113510237 | 113520733 |
| chr13 | 113510237 | 113534240 |
| chr13 | 113520615 | 113539507 |
| chr13 | 113585773 | 113636700 |
| chr13 | 113610995 | 113623286 |
| chr13 | 113823374 | 113828711 |
| chr13 | 113999584 | 114000932 |
| chr13 | 114024278 | 114029887 |
| chr13 | 114040999 | 114073837 |
| chr13 | 114052051 | 114073837 |
| chr13 | 114236644 | 114259398 |
| chr13 | 114236798 | 114250674 |
| chr13 | 114242120 | 114247004 |
| chr13 | 114262878 | 114272481 |
| chr13 | 19705661  | 19709599  |
| chr13 | 19730238  | 19782791  |
| chr13 | 19741564  | 19759418  |
| chr13 | 19751270  | 19759418  |
| chr13 | 19759322  | 19772543  |
| chr13 | 19835476  | 19862466  |
| chr13 | 19851354  | 19852190  |
| chr13 | 19959957  | 20036909  |
| chr13 | 19959957  | 20067390  |
| chr13 | 19993062  | 20006586  |
| chr13 | 20019546  | 20036909  |
| chr13 | 20026611  | 20036909  |
| chr13 | 20026611  | 20052311  |

|       |          |          |
|-------|----------|----------|
| chr13 | 20051432 | 20059562 |
| chr13 | 20051432 | 20067390 |
| chr13 | 20058574 | 20059562 |
| chr13 | 20058574 | 20064545 |
| chr13 | 20061052 | 20067390 |
| chr13 | 20062845 | 20067019 |
| chr13 | 20064450 | 20083032 |
| chr13 | 20641289 | 20644958 |
| chr13 | 20731840 | 20737805 |
| chr13 | 20790461 | 20855765 |
| chr13 | 20796075 | 20800990 |
| chr13 | 20799164 | 20800990 |
| chr13 | 20821703 | 20822289 |
| chr13 | 20821703 | 20843886 |
| chr13 | 20821703 | 20868701 |
| chr13 | 20827066 | 20868701 |
| chr13 | 20855626 | 20868701 |
| chr13 | 20862716 | 20868701 |
| chr13 | 21155692 | 21158125 |
| chr13 | 21157921 | 21172681 |
| chr13 | 21159901 | 21172681 |
| chr13 | 21161789 | 21168399 |
| chr13 | 21161789 | 21172681 |
| chr13 | 21167987 | 21172681 |
| chr13 | 21381433 | 21387634 |
| chr13 | 21381433 | 21391854 |
| chr13 | 21381433 | 21401685 |
| chr13 | 21381433 | 21402866 |
| chr13 | 21387507 | 21425678 |
| chr13 | 21400372 | 21413772 |
| chr13 | 21400372 | 21425678 |
| chr13 | 23353784 | 23365277 |
| chr13 | 23353784 | 23368487 |
| chr13 | 23353784 | 23371165 |
| chr13 | 23358334 | 23368487 |
| chr13 | 23358334 | 23371165 |
| chr13 | 23365165 | 23368487 |
| chr13 | 23365165 | 23371165 |
| chr13 | 23365165 | 23375269 |
| chr13 | 23756544 | 23806069 |
| chr13 | 23756544 | 23809924 |
| chr13 | 23756544 | 23862362 |
| chr13 | 23756544 | 23886506 |
| chr13 | 23805949 | 23809924 |
| chr13 | 23805949 | 23839726 |

|       |          |          |
|-------|----------|----------|
| chr13 | 23805949 | 23841488 |
| chr13 | 23805949 | 23870195 |
| chr13 | 23805949 | 23874909 |
| chr13 | 23805949 | 23886506 |
| chr13 | 23836239 | 23841488 |
| chr13 | 23836239 | 23864189 |
| chr13 | 23836239 | 23886506 |
| chr13 | 23837551 | 23886506 |
| chr13 | 23839648 | 23886506 |
| chr13 | 23841334 | 23879354 |
| chr13 | 23841334 | 23886506 |
| chr13 | 23858859 | 23870195 |
| chr13 | 23858859 | 23874909 |
| chr13 | 23858859 | 23881787 |
| chr13 | 23858859 | 23886506 |
| chr13 | 23862301 | 23870195 |
| chr13 | 23862301 | 23881787 |
| chr13 | 23862301 | 23886506 |
| chr13 | 23864140 | 23881787 |
| chr13 | 23864140 | 23886506 |
| chr13 | 23869291 | 23881787 |
| chr13 | 23869291 | 23886506 |
| chr13 | 23870012 | 23886506 |
| chr13 | 23874845 | 23886506 |
| chr13 | 23879267 | 23886506 |
| chr13 | 24222818 | 24251862 |
| chr13 | 24249476 | 24251862 |
| chr13 | 24249476 | 24284271 |
| chr13 | 24278613 | 24290884 |
| chr13 | 24284134 | 24286393 |
| chr13 | 24284134 | 24290884 |
| chr13 | 24286213 | 24290884 |
| chr13 | 24288998 | 24290884 |
| chr13 | 24441845 | 24443730 |
| chr13 | 24441845 | 24447186 |
| chr13 | 24441845 | 24449817 |
| chr13 | 24441845 | 24452593 |
| chr13 | 24441845 | 24455212 |
| chr13 | 24452405 | 24456478 |
| chr13 | 24452405 | 24460136 |
| chr13 | 24455016 | 24460136 |
| chr13 | 24455016 | 24500382 |
| chr13 | 24456340 | 24493733 |
| chr13 | 24456340 | 24499376 |
| chr13 | 24456340 | 24501834 |

|       |          |          |
|-------|----------|----------|
| chr13 | 24459043 | 24469110 |
| chr13 | 24459043 | 24475596 |
| chr13 | 24459043 | 24478276 |
| chr13 | 24459043 | 24493733 |
| chr13 | 24459263 | 24475596 |
| chr13 | 24469023 | 24475596 |
| chr13 | 24469023 | 24478276 |
| chr13 | 24469023 | 24486305 |
| chr13 | 24469893 | 24499376 |
| chr13 | 24475471 | 24478276 |
| chr13 | 24475471 | 24498229 |
| chr13 | 24477700 | 24478276 |
| chr13 | 24477700 | 24484748 |
| chr13 | 24477700 | 24486305 |
| chr13 | 24477700 | 24493733 |
| chr13 | 24477700 | 24501834 |
| chr13 | 24477700 | 24503777 |
| chr13 | 24478092 | 24493733 |
| chr13 | 24484652 | 24486305 |
| chr13 | 24484652 | 24493733 |
| chr13 | 24484652 | 24498229 |
| chr13 | 24484652 | 24499376 |
| chr13 | 24484652 | 24501834 |
| chr13 | 24484652 | 24503777 |
| chr13 | 24490667 | 24493733 |
| chr13 | 24490667 | 24498229 |
| chr13 | 24490667 | 24501834 |
| chr13 | 24490667 | 24503777 |
| chr13 | 24492420 | 24498229 |
| chr13 | 24493595 | 24498229 |
| chr13 | 24498115 | 24501834 |
| chr13 | 24498115 | 24503777 |
| chr13 | 24499300 | 24501834 |
| chr13 | 24499300 | 24503777 |
| chr13 | 24500315 | 24501834 |
| chr13 | 25251648 | 25274187 |
| chr13 | 25251852 | 25274187 |
| chr13 | 25265818 | 25267941 |
| chr13 | 25307805 | 25313751 |
| chr13 | 25307805 | 25315467 |
| chr13 | 25307805 | 25321093 |
| chr13 | 25307805 | 25325068 |
| chr13 | 25309246 | 25321093 |
| chr13 | 25312882 | 25321093 |
| chr13 | 25312882 | 25327512 |

|       |          |          |
|-------|----------|----------|
| chr13 | 25319325 | 25321093 |
| chr13 | 25320529 | 25338731 |
| chr13 | 25326915 | 25327512 |
| chr13 | 25769045 | 25774959 |
| chr13 | 26218510 | 26221330 |
| chr13 | 26337566 | 26353880 |
| chr13 | 26337566 | 26385342 |
| chr13 | 26353739 | 26400550 |
| chr13 | 26382813 | 26401624 |
| chr13 | 26400452 | 26401624 |
| chr13 | 26612960 | 26642403 |
| chr13 | 26612960 | 26671989 |
| chr13 | 26612960 | 26676724 |
| chr13 | 27075190 | 27090158 |
| chr13 | 27075190 | 27105944 |
| chr13 | 27089882 | 27105944 |
| chr13 | 27089882 | 27116596 |
| chr13 | 27427091 | 27430621 |
| chr13 | 27437115 | 27445156 |
| chr13 | 27567639 | 27569276 |
| chr13 | 27567639 | 27581803 |
| chr13 | 28174271 | 28177935 |
| chr13 | 28174271 | 28197346 |
| chr13 | 28174271 | 28220378 |
| chr13 | 28174271 | 28256539 |
| chr13 | 28177864 | 28220378 |
| chr13 | 28197184 | 28220378 |
| chr13 | 28197184 | 28272071 |
| chr13 | 28256291 | 28261458 |
| chr13 | 28256291 | 28266876 |
| chr13 | 28256291 | 28270866 |
| chr13 | 28256291 | 28281379 |
| chr13 | 28260446 | 28280541 |
| chr13 | 28266714 | 28270866 |
| chr13 | 28662409 | 28668574 |
| chr13 | 28662409 | 28672432 |
| chr13 | 28703942 | 28710843 |
| chr13 | 28703942 | 28713550 |
| chr13 | 28710759 | 28713550 |
| chr13 | 28710759 | 28718022 |
| chr13 | 29281703 | 29324711 |
| chr13 | 29281703 | 29359473 |
| chr13 | 29324612 | 29359473 |
| chr13 | 29480149 | 29492719 |
| chr13 | 29487899 | 29492719 |

|       |          |          |
|-------|----------|----------|
| chr13 | 29492645 | 29501194 |
| chr13 | 29516137 | 29519549 |
| chr13 | 29517143 | 29517790 |
| chr13 | 29517143 | 29532982 |
| chr13 | 29517143 | 29536202 |
| chr13 | 29517143 | 29553860 |
| chr13 | 29517572 | 29536202 |
| chr13 | 29522316 | 29524253 |
| chr13 | 29522316 | 29532982 |
| chr13 | 29522316 | 29536202 |
| chr13 | 29522316 | 29553860 |
| chr13 | 29523265 | 29536202 |
| chr13 | 29530537 | 29532982 |
| chr13 | 29530537 | 29536202 |
| chr13 | 29530537 | 29553860 |
| chr13 | 29532823 | 29536202 |
| chr13 | 29532823 | 29553860 |
| chr13 | 29535818 | 29553860 |
| chr13 | 29767617 | 29777263 |
| chr13 | 30210315 | 30280223 |
| chr13 | 30227411 | 30231472 |
| chr13 | 30227411 | 30241086 |
| chr13 | 30227411 | 30255615 |
| chr13 | 30227411 | 30283791 |
| chr13 | 30230467 | 30280223 |
| chr13 | 30231313 | 30241086 |
| chr13 | 30240459 | 30255615 |
| chr13 | 30240459 | 30280223 |
| chr13 | 30240459 | 30283791 |
| chr13 | 30240958 | 30255615 |
| chr13 | 30255446 | 30280223 |
| chr13 | 30255446 | 30283791 |
| chr13 | 30280062 | 30283791 |
| chr13 | 30621763 | 30642757 |
| chr13 | 30621763 | 30653305 |
| chr13 | 30630834 | 30647057 |
| chr13 | 30630834 | 30653305 |
| chr13 | 30637743 | 30647057 |
| chr13 | 30642627 | 30647057 |
| chr13 | 31215050 | 31229294 |
| chr13 | 31215050 | 31247966 |
| chr13 | 31215050 | 31261082 |
| chr13 | 31215050 | 31286819 |
| chr13 | 31222951 | 31286819 |
| chr13 | 31229184 | 31269277 |

|       |          |          |
|-------|----------|----------|
| chr13 | 31247022 | 31261082 |
| chr13 | 31269213 | 31286819 |
| chr13 | 31946008 | 31956471 |
| chr13 | 32078833 | 32117473 |
| chr13 | 32265449 | 32267359 |
| chr13 | 32316421 | 32326282 |
| chr13 | 32319076 | 32325184 |
| chr13 | 32319076 | 32326613 |
| chr13 | 32325075 | 32326613 |
| chr13 | 32346826 | 32355288 |
| chr13 | 32346826 | 32357929 |
| chr13 | 32362522 | 32363533 |
| chr13 | 32379316 | 32380145 |
| chr13 | 32517856 | 32527532 |
| chr13 | 32521372 | 32527532 |
| chr13 | 32522181 | 32527532 |
| chr13 | 32648753 | 32652007 |
| chr13 | 32648753 | 32658531 |
| chr13 | 32648753 | 32678929 |
| chr13 | 32658238 | 32659280 |
| chr13 | 32658238 | 32667844 |
| chr13 | 32658238 | 32678929 |
| chr13 | 32667763 | 32710106 |
| chr13 | 32678834 | 32696902 |
| chr13 | 32687133 | 32696902 |
| chr13 | 32732100 | 32735330 |
| chr13 | 32732100 | 32746100 |
| chr13 | 32753331 | 32760720 |
| chr13 | 35040932 | 35045401 |
| chr13 | 35040932 | 35048684 |
| chr13 | 35040932 | 35050395 |
| chr13 | 35117413 | 35123574 |
| chr13 | 35176995 | 35232619 |
| chr13 | 35208699 | 35232619 |
| chr13 | 36189945 | 36202093 |
| chr13 | 36326574 | 36335832 |
| chr13 | 36853418 | 36879875 |
| chr13 | 36952513 | 36985740 |
| chr13 | 36985626 | 36995596 |
| chr13 | 36993603 | 36995596 |
| chr13 | 37040404 | 37051583 |
| chr13 | 37047534 | 37051583 |
| chr13 | 39679537 | 39727548 |
| chr13 | 39694633 | 39727548 |
| chr13 | 40749137 | 40759106 |



|       |          |          |
|-------|----------|----------|
| chr13 | 40805117 | 40808596 |
| chr13 | 40826505 | 40836885 |
| chr13 | 40826505 | 40855815 |
| chr13 | 41252644 | 41260915 |
| chr13 | 41316845 | 41320824 |
| chr13 | 41316845 | 41323190 |
| chr13 | 41316845 | 41331369 |
| chr13 | 41318805 | 41336756 |
| chr13 | 41325697 | 41331369 |
| chr13 | 41328723 | 41331369 |
| chr13 | 41369089 | 41372830 |
| chr13 | 41670945 | 41685242 |
| chr13 | 41670945 | 41703411 |
| chr13 | 41727193 | 41811340 |
| chr13 | 41761127 | 41778056 |
| chr13 | 41761127 | 41833531 |
| chr13 | 41777984 | 41811340 |
| chr13 | 41777984 | 41819386 |
| chr13 | 41777984 | 41833531 |
| chr13 | 41787436 | 41819386 |
| chr13 | 41811224 | 41819386 |
| chr13 | 41811224 | 41833531 |
| chr13 | 41811224 | 41868477 |
| chr13 | 41865735 | 41868477 |
| chr13 | 41865735 | 41887361 |
| chr13 | 41865735 | 41891587 |
| chr13 | 41883386 | 41912168 |
| chr13 | 41883386 | 41950013 |
| chr13 | 41891419 | 41912168 |
| chr13 | 41907585 | 41912168 |
| chr13 | 41907585 | 41950013 |
| chr13 | 42155290 | 42155799 |
| chr13 | 42155290 | 42160136 |
| chr13 | 42159265 | 42160136 |
| chr13 | 42165330 | 42168818 |
| chr13 | 42168439 | 42187148 |
| chr13 | 42168439 | 42190525 |
| chr13 | 42190402 | 42195016 |
| chr13 | 42198477 | 42209465 |
| chr13 | 42285985 | 42295742 |
| chr13 | 42895008 | 42900383 |
| chr13 | 43065685 | 43085838 |
| chr13 | 43411915 | 43412988 |
| chr13 | 44949721 | 44959574 |
| chr13 | 44959380 | 44982154 |

|       |          |          |
|-------|----------|----------|
| chr13 | 44965843 | 44982154 |
| chr13 | 44979189 | 44982154 |
| chr13 | 45136732 | 45207505 |
| chr13 | 45136732 | 45252970 |
| chr13 | 45149769 | 45207505 |
| chr13 | 45151686 | 45207505 |
| chr13 | 45207423 | 45267376 |
| chr13 | 45338659 | 45340184 |
| chr13 | 45402274 | 45404412 |
| chr13 | 45516142 | 45519094 |
| chr13 | 45516142 | 45525051 |
| chr13 | 45979812 | 45989097 |
| chr13 | 45988786 | 46010505 |
| chr13 | 46356431 | 46363213 |
| chr13 | 46368041 | 46368815 |
| chr13 | 46689132 | 46728984 |
| chr13 | 46692535 | 46695017 |
| chr13 | 46692535 | 46728984 |
| chr13 | 46711790 | 46733998 |
| chr13 | 46723220 | 46728984 |
| chr13 | 46723220 | 46733998 |
| chr13 | 47948939 | 47954557 |
| chr13 | 47948939 | 47997023 |
| chr13 | 47988540 | 47997023 |
| chr13 | 48079843 | 48090418 |
| chr13 | 48083370 | 48090418 |
| chr13 | 48342598 | 48349023 |
| chr13 | 48367493 | 48377034 |
| chr13 | 48373404 | 48381443 |
| chr13 | 49006151 | 49138805 |
| chr13 | 49075288 | 49136601 |
| chr13 | 49131136 | 49145935 |
| chr13 | 49138746 | 49145935 |
| chr13 | 49138746 | 49167303 |
| chr13 | 49145777 | 49172096 |
| chr13 | 49167243 | 49175541 |
| chr13 | 49168612 | 49178654 |
| chr13 | 49168612 | 49188633 |
| chr13 | 49187121 | 49188633 |
| chr13 | 49359713 | 49401270 |
| chr13 | 49451552 | 49461162 |
| chr13 | 49451552 | 49467960 |
| chr13 | 49480218 | 49483563 |
| chr13 | 49523174 | 49524216 |
| chr13 | 49551325 | 49552285 |

|       |          |          |
|-------|----------|----------|
| chr13 | 49705620 | 49706372 |
| chr13 | 49705620 | 49711022 |
| chr13 | 49706097 | 49711022 |
| chr13 | 49709571 | 49722563 |
| chr13 | 49709571 | 49725501 |
| chr13 | 49732370 | 49746993 |
| chr13 | 49927918 | 49931134 |
| chr13 | 49997073 | 50044768 |
| chr13 | 50433412 | 50492761 |
| chr13 | 50927406 | 50934999 |
| chr13 | 50927406 | 50943394 |
| chr13 | 50927406 | 50949505 |
| chr13 | 51376047 | 51389444 |
| chr13 | 51395299 | 51430383 |
| chr13 | 51675169 | 51727790 |
| chr13 | 51703595 | 51739175 |
| chr13 | 51719197 | 51739175 |
| chr13 | 51957515 | 51965033 |
| chr13 | 52397231 | 52402681 |
| chr13 | 52416016 | 52427066 |
| chr13 | 52416016 | 52442445 |
| chr13 | 52417991 | 52426066 |
| chr13 | 52417991 | 52427219 |
| chr13 | 52433661 | 52434882 |
| chr13 | 52434792 | 52442445 |
| chr13 | 52621988 | 52637446 |
| chr13 | 52632421 | 52637446 |
| chr13 | 52657531 | 52659249 |
| chr13 | 52658398 | 52665733 |
| chr13 | 52658398 | 52680155 |
| chr13 | 52661474 | 52666919 |
| chr13 | 52676229 | 52680155 |
| chr13 | 59774188 | 59810923 |
| chr13 | 59774188 | 59839448 |
| chr13 | 59833106 | 59839448 |
| chr13 | 59833106 | 59861536 |
| chr13 | 59833106 | 59916249 |
| chr13 | 59861406 | 59916249 |
| chr13 | 59861406 | 59924870 |
| chr13 | 59879228 | 59916249 |
| chr13 | 59879228 | 59924870 |
| chr13 | 59911734 | 59916249 |
| chr13 | 59911734 | 59924870 |
| chr13 | 59911734 | 59971160 |
| chr13 | 59969943 | 59974456 |

|       |          |          |
|-------|----------|----------|
| chr13 | 60008543 | 60010669 |
| chr13 | 60008543 | 60016145 |
| chr13 | 60008543 | 60042820 |
| chr13 | 60093627 | 60112186 |
| chr13 | 60093627 | 60132989 |
| chr13 | 60439687 | 60460540 |
| chr13 | 60439687 | 60467379 |
| chr13 | 60439687 | 60485948 |
| chr13 | 60444682 | 60483846 |
| chr13 | 60444682 | 60485948 |
| chr13 | 60444682 | 60494575 |
| chr13 | 60460379 | 60467379 |
| chr13 | 60460379 | 60483846 |
| chr13 | 60467237 | 60494575 |
| chr13 | 60483774 | 60510755 |
| chr13 | 60483774 | 60535233 |
| chr13 | 60509762 | 60510755 |
| chr13 | 60535107 | 60567650 |
| chr13 | 72743536 | 72747111 |
| chr13 | 72854056 | 72931267 |
| chr13 | 72893783 | 72908681 |
| chr13 | 72893783 | 72931267 |
| chr13 | 72908530 | 72931267 |
| chr13 | 73813151 | 73846373 |
| chr13 | 75294853 | 75306471 |
| chr13 | 75302242 | 75306471 |
| chr13 | 75326196 | 75327826 |
| chr13 | 75326196 | 75349302 |
| chr13 | 75336920 | 75359858 |
| chr13 | 75336920 | 75362607 |
| chr13 | 75560752 | 75569507 |
| chr13 | 75566694 | 75569507 |
| chr13 | 77015408 | 77021861 |
| chr13 | 77081426 | 77087633 |
| chr13 | 77171491 | 77180318 |
| chr13 | 77176496 | 77180318 |
| chr13 | 77205255 | 77217957 |
| chr13 | 77217839 | 77233263 |
| chr13 | 77217839 | 77243951 |
| chr13 | 77217839 | 77264002 |
| chr13 | 77243058 | 77251355 |
| chr13 | 77243058 | 77262129 |
| chr13 | 77251150 | 77264002 |
| chr13 | 77251150 | 77296674 |
| chr13 | 77257670 | 77264002 |

|       |          |          |
|-------|----------|----------|
| chr13 | 77260427 | 77264002 |
| chr13 | 77278757 | 77296674 |
| chr13 | 78635109 | 78644997 |
| chr13 | 79368729 | 79371930 |
| chr13 | 79370944 | 79371930 |
| chr13 | 79520809 | 79539775 |
| chr13 | 94605390 | 94619517 |
| chr13 | 95034604 | 95053184 |
| chr13 | 95034604 | 95062859 |
| chr13 | 95034604 | 95083290 |
| chr13 | 95043681 | 95053184 |
| chr13 | 95071661 | 95083290 |
| chr13 | 95115921 | 95170628 |
| chr13 | 95115921 | 95188542 |
| chr13 | 95115921 | 95194937 |
| chr13 | 95161188 | 95166367 |
| chr13 | 95161188 | 95170628 |
| chr13 | 95161188 | 95178091 |
| chr13 | 95161188 | 95188542 |
| chr13 | 95170531 | 95178091 |
| chr13 | 95170531 | 95188542 |
| chr13 | 95177706 | 95188542 |
| chr13 | 95206531 | 95210781 |
| chr13 | 95206531 | 95234834 |
| chr13 | 95709226 | 95725252 |
| chr13 | 95723241 | 95725252 |
| chr13 | 95757643 | 95760798 |
| chr13 | 95757643 | 95763953 |
| chr13 | 95832926 | 95837202 |
| chr13 | 95832926 | 95859675 |
| chr13 | 95925679 | 95940091 |
| chr13 | 95925679 | 95949454 |
| chr13 | 95925679 | 95972671 |
| chr13 | 95947036 | 95996135 |
| chr13 | 95947995 | 95996135 |
| chr13 | 95970111 | 95996135 |
| chr13 | 95970111 | 95999307 |
| chr13 | 95983803 | 95990073 |
| chr13 | 95983803 | 95996135 |
| chr13 | 95983803 | 95999307 |
| chr13 | 95983803 | 96013481 |
| chr13 | 95986332 | 95996135 |
| chr13 | 96013306 | 96031971 |
| chr13 | 97992891 | 98000645 |
| chr13 | 98457167 | 98466561 |

|       |           |           |
|-------|-----------|-----------|
| chr13 | 98457167  | 98475358  |
| chr13 | 98457167  | 98519473  |
| chr13 | 98463690  | 98475358  |
| chr13 | 98474820  | 98475358  |
| chr13 | 98474820  | 98482321  |
| chr13 | 98474820  | 98519473  |
| chr13 | 98482264  | 98519473  |
| chr13 | 98824397  | 98837609  |
| chr13 | 98883812  | 98885092  |
| chr13 | 98920953  | 98923371  |
| chr13 | 98920953  | 98930257  |
| chr13 | 99238426  | 99244624  |
| chr13 | 99238426  | 99318069  |
| chr13 | 99243831  | 99244624  |
| chr13 | 99314096  | 99340565  |
| chr13 | 99529466  | 99537863  |
| chr13 | 99536607  | 99559534  |
| chr13 | 99541558  | 99549222  |
| chr14 | 100084686 | 100097658 |
| chr14 | 100262303 | 100274758 |
| chr14 | 100337061 | 100343387 |
| chr14 | 100353686 | 100361921 |
| chr14 | 100380909 | 100468168 |
| chr14 | 100380909 | 100484124 |
| chr14 | 100468020 | 100484124 |
| chr14 | 101882160 | 101890296 |
| chr14 | 101892999 | 101909690 |
| chr14 | 101901718 | 101906529 |
| chr14 | 101901718 | 101917947 |
| chr14 | 101912400 | 101917947 |
| chr14 | 101983018 | 101987632 |
| chr14 | 101991526 | 101995300 |
| chr14 | 102002536 | 102002965 |
| chr14 | 102009842 | 102012113 |
| chr14 | 102018450 | 102020056 |
| chr14 | 102018450 | 102022880 |
| chr14 | 102019892 | 102022880 |
| chr14 | 102027173 | 102027544 |
| chr14 | 102038459 | 102039732 |
| chr14 | 102038459 | 102042748 |
| chr14 | 102040235 | 102040673 |
| chr14 | 102040235 | 102044698 |
| chr14 | 102043874 | 102044698 |
| chr14 | 102193462 | 102195120 |
| chr14 | 102194937 | 102197847 |

|       |           |           |
|-------|-----------|-----------|
| chr14 | 102325984 | 102331846 |
| chr14 | 102325984 | 102335838 |
| chr14 | 102325984 | 102339223 |
| chr14 | 102331621 | 102339223 |
| chr14 | 102376649 | 102408619 |
| chr14 | 102376649 | 102414793 |
| chr14 | 102424978 | 102428382 |
| chr14 | 102681894 | 102707512 |
| chr14 | 102681894 | 102711013 |
| chr14 | 102701277 | 102708583 |
| chr14 | 102714422 | 102721377 |
| chr14 | 102830333 | 102876525 |
| chr14 | 102830333 | 102897401 |
| chr14 | 102870184 | 102871968 |
| chr14 | 102870184 | 102876525 |
| chr14 | 102870184 | 102891417 |
| chr14 | 102870184 | 102897401 |
| chr14 | 102870184 | 102903429 |
| chr14 | 102875623 | 102891417 |
| chr14 | 102889559 | 102903429 |
| chr14 | 102946467 | 102950602 |
| chr14 | 102963060 | 102964650 |
| chr14 | 102968252 | 102970261 |
| chr14 | 102980772 | 102986580 |
| chr14 | 102983555 | 102986580 |
| chr14 | 102999564 | 103008555 |
| chr14 | 102999564 | 103012188 |
| chr14 | 103003927 | 103012188 |
| chr14 | 103008471 | 103012188 |
| chr14 | 103335652 | 103339803 |
| chr14 | 103336676 | 103339803 |
| chr14 | 103338326 | 103339803 |
| chr14 | 103405075 | 103428440 |
| chr14 | 103405075 | 103448967 |
| chr14 | 103448918 | 103457212 |
| chr14 | 103451917 | 103462461 |
| chr14 | 103451917 | 103466442 |
| chr14 | 103451917 | 103468186 |
| chr14 | 103468032 | 103492034 |
| chr14 | 103474992 | 103480490 |
| chr14 | 103491776 | 103500200 |
| chr14 | 103571622 | 103574170 |
| chr14 | 103654563 | 103657776 |
| chr14 | 103662115 | 103662927 |
| chr14 | 103662115 | 103670283 |

|       |           |           |
|-------|-----------|-----------|
| chr14 | 103669510 | 103673431 |
| chr14 | 103669510 | 103677523 |
| chr14 | 103728907 | 103729846 |
| chr14 | 103746372 | 103749934 |
| chr14 | 103746372 | 103757751 |
| chr14 | 103746372 | 103797518 |
| chr14 | 103752999 | 103754244 |
| chr14 | 103752999 | 103757751 |
| chr14 | 103752999 | 103797518 |
| chr14 | 103778744 | 103797518 |
| chr14 | 103784794 | 103797518 |
| chr14 | 104157754 | 104167048 |
| chr14 | 104774937 | 104792722 |
| chr14 | 104775651 | 104792722 |
| chr14 | 105151282 | 105155989 |
| chr14 | 105226068 | 105226760 |
| chr14 | 105226068 | 105228913 |
| chr14 | 105226068 | 105241414 |
| chr14 | 105252506 | 105272894 |
| chr14 | 105252506 | 105286376 |
| chr14 | 105348492 | 105355177 |
| chr14 | 105438671 | 105454310 |
| chr14 | 105450057 | 105460953 |
| chr14 | 105450057 | 105466742 |
| chr14 | 105450260 | 105454310 |
| chr14 | 105454192 | 105460953 |
| chr14 | 19064582  | 19066347  |
| chr14 | 20316226  | 20329373  |
| chr14 | 20325538  | 20329373  |
| chr14 | 20344931  | 20345464  |
| chr14 | 20344931  | 20346913  |
| chr14 | 20344931  | 20351122  |
| chr14 | 20344931  | 20352347  |
| chr14 | 20346862  | 20354247  |
| chr14 | 20350525  | 20352347  |
| chr14 | 20352244  | 20354247  |
| chr14 | 20369343  | 20369779  |
| chr14 | 20369343  | 20401581  |
| chr14 | 20389609  | 20403448  |
| chr14 | 20395449  | 20395949  |
| chr14 | 20395449  | 20396730  |
| chr14 | 20400983  | 20403884  |
| chr14 | 20403376  | 20406400  |
| chr14 | 20996208  | 20996711  |
| chr14 | 21076359  | 21088876  |



|       |          |          |
|-------|----------|----------|
| chr14 | 21091864 | 21093674 |
| chr14 | 21211405 | 21213117 |
| chr14 | 21211405 | 21234229 |
| chr14 | 21211809 | 21234229 |
| chr14 | 21211809 | 21263336 |
| chr14 | 21230318 | 21234229 |
| chr14 | 21230318 | 21263336 |
| chr14 | 21357196 | 21361213 |
| chr14 | 21368268 | 21373430 |
| chr14 | 21371873 | 21373430 |
| chr14 | 21390946 | 21393254 |
| chr14 | 21390946 | 21395352 |
| chr14 | 21401956 | 21403663 |
| chr14 | 21415573 | 21429335 |
| chr14 | 21426127 | 21429335 |
| chr14 | 21488589 | 21489403 |
| chr14 | 21499763 | 21500682 |
| chr14 | 21500494 | 21501903 |
| chr14 | 21503172 | 21503881 |
| chr14 | 22769790 | 22771348 |
| chr14 | 22906194 | 22909595 |
| chr14 | 22906194 | 22911403 |
| chr14 | 22908332 | 22911403 |
| chr14 | 22909482 | 22911403 |
| chr14 | 22924269 | 22928211 |
| chr14 | 22926132 | 22926814 |
| chr14 | 22926132 | 22927660 |
| chr14 | 22947170 | 22948013 |
| chr14 | 22947170 | 22950410 |
| chr14 | 22947170 | 22952683 |
| chr14 | 22947170 | 22955176 |
| chr14 | 22947600 | 22955176 |
| chr14 | 22950313 | 22952683 |
| chr14 | 22950313 | 22955176 |
| chr14 | 22974046 | 22976712 |
| chr14 | 23061083 | 23061622 |
| chr14 | 23061083 | 23064488 |
| chr14 | 23081747 | 23090633 |
| chr14 | 23322180 | 23324289 |
| chr14 | 24210347 | 24210768 |
| chr14 | 24210347 | 24211829 |
| chr14 | 24211414 | 24211829 |
| chr14 | 24266429 | 24268619 |
| chr14 | 24440782 | 24442452 |
| chr14 | 29599026 | 29626556 |

|       |          |          |
|-------|----------|----------|
| chr14 | 29624151 | 29636494 |
| chr14 | 29632868 | 29638904 |
| chr14 | 30581075 | 30593639 |
| chr14 | 30586717 | 30593639 |
| chr14 | 30597419 | 30602131 |
| chr14 | 30598482 | 30602131 |
| chr14 | 30628208 | 30634037 |
| chr14 | 30628208 | 30638247 |
| chr14 | 30628208 | 30639864 |
| chr14 | 30628208 | 30643405 |
| chr14 | 30628208 | 30653588 |
| chr14 | 30628208 | 30670395 |
| chr14 | 30633946 | 30638247 |
| chr14 | 30633946 | 30639864 |
| chr14 | 30633946 | 30643405 |
| chr14 | 30633946 | 30653588 |
| chr14 | 30638124 | 30653588 |
| chr14 | 30639776 | 30650650 |
| chr14 | 30643315 | 30670395 |
| chr14 | 30670255 | 30673997 |
| chr14 | 30670255 | 30675065 |
| chr14 | 30670255 | 30700258 |
| chr14 | 30670255 | 30708065 |
| chr14 | 30673256 | 30694869 |
| chr14 | 30673256 | 30702375 |
| chr14 | 30673256 | 30705885 |
| chr14 | 30705822 | 30722559 |
| chr14 | 30705822 | 30734858 |
| chr14 | 30715923 | 30734858 |
| chr14 | 30902535 | 30911162 |
| chr14 | 30905417 | 30913657 |
| chr14 | 30905417 | 30956242 |
| chr14 | 30911040 | 30913657 |
| chr14 | 30911776 | 30956242 |
| chr14 | 30913523 | 30919106 |
| chr14 | 30935162 | 30950944 |
| chr14 | 30935162 | 30956242 |
| chr14 | 30947089 | 30950944 |
| chr14 | 30947089 | 30956242 |
| chr14 | 30950862 | 30956242 |
| chr14 | 30955619 | 30956242 |
| chr14 | 31066125 | 31069929 |
| chr14 | 31066125 | 31072973 |
| chr14 | 31105382 | 31112543 |
| chr14 | 31112415 | 31114340 |

|       |          |          |
|-------|----------|----------|
| chr14 | 31112415 | 31119866 |
| chr14 | 31112415 | 31133675 |
| chr14 | 31113103 | 31114340 |
| chr14 | 31116235 | 31121505 |
| chr14 | 31116235 | 31133675 |
| chr14 | 31127784 | 31133414 |
| chr14 | 31127784 | 31133675 |
| chr14 | 31127784 | 31144941 |
| chr14 | 31133237 | 31133675 |
| chr14 | 31133237 | 31136665 |
| chr14 | 31141857 | 31172122 |
| chr14 | 31144110 | 31172122 |
| chr14 | 31156839 | 31157303 |
| chr14 | 31156839 | 31169468 |
| chr14 | 31156839 | 31172122 |
| chr14 | 31168297 | 31169468 |
| chr14 | 31168297 | 31172122 |
| chr14 | 31168297 | 31178254 |
| chr14 | 31295908 | 31308020 |
| chr14 | 31302294 | 31308020 |
| chr14 | 31302294 | 31309182 |
| chr14 | 31304904 | 31306879 |
| chr14 | 31306731 | 31308020 |
| chr14 | 31306731 | 31309182 |
| chr14 | 31306731 | 31315949 |
| chr14 | 31315769 | 31321680 |
| chr14 | 31326162 | 31337614 |
| chr14 | 31326162 | 31347907 |
| chr14 | 31337475 | 31347907 |
| chr14 | 31343895 | 31345276 |
| chr14 | 31345086 | 31347907 |
| chr14 | 31349788 | 31350717 |
| chr14 | 31358636 | 31387375 |
| chr14 | 31364188 | 31387375 |
| chr14 | 31371809 | 31387375 |
| chr14 | 31374815 | 31387375 |
| chr14 | 31380466 | 31383771 |
| chr14 | 31394051 | 31403049 |
| chr14 | 31562067 | 31599379 |
| chr14 | 31562067 | 31673574 |
| chr14 | 31599288 | 31673574 |
| chr14 | 32117139 | 32152528 |
| chr14 | 34524696 | 34533539 |
| chr14 | 34529357 | 34533539 |
| chr14 | 34567685 | 34568013 |

|       |          |          |
|-------|----------|----------|
| chr14 | 34567853 | 34597645 |
| chr14 | 34567853 | 34608140 |
| chr14 | 34575755 | 34586305 |
| chr14 | 34575755 | 34609742 |
| chr14 | 34581560 | 34609742 |
| chr14 | 34586229 | 34597645 |
| chr14 | 34586229 | 34609742 |
| chr14 | 34593044 | 34597645 |
| chr14 | 34593044 | 34609742 |
| chr14 | 34597549 | 34609742 |
| chr14 | 34603347 | 34609742 |
| chr14 | 34603347 | 34629954 |
| chr14 | 34758703 | 34762223 |
| chr14 | 34775918 | 34780310 |
| chr14 | 34775918 | 34783232 |
| chr14 | 34783761 | 34786221 |
| chr14 | 34783761 | 34792921 |
| chr14 | 34783761 | 34795765 |
| chr14 | 34792774 | 34795765 |
| chr14 | 34800223 | 34807538 |
| chr14 | 34802853 | 34807538 |
| chr14 | 34807450 | 34862322 |
| chr14 | 34810934 | 34862322 |
| chr14 | 34826012 | 34862322 |
| chr14 | 34999557 | 35001020 |
| chr14 | 35000935 | 35008831 |
| chr14 | 35000935 | 35014830 |
| chr14 | 35007282 | 35008831 |
| chr14 | 35007282 | 35011659 |
| chr14 | 35013345 | 35019074 |
| chr14 | 35018691 | 35019074 |
| chr14 | 35046504 | 35053451 |
| chr14 | 35096557 | 35108236 |
| chr14 | 35099251 | 35108236 |
| chr14 | 35099251 | 35110629 |
| chr14 | 35107303 | 35110629 |
| chr14 | 35109818 | 35110629 |
| chr14 | 35122951 | 35180777 |
| chr14 | 35126734 | 35127611 |
| chr14 | 35126734 | 35180777 |
| chr14 | 35307993 | 35310895 |
| chr14 | 35307993 | 35314455 |
| chr14 | 35595633 | 35635598 |
| chr14 | 35595633 | 35659196 |
| chr14 | 35625360 | 35627951 |

|       |          |          |
|-------|----------|----------|
| chr14 | 35625360 | 35635598 |
| chr14 | 35651804 | 35659196 |
| chr14 | 35721687 | 35725153 |
| chr14 | 35721687 | 35742565 |
| chr14 | 35738512 | 35762753 |
| chr14 | 35770941 | 35775745 |
| chr14 | 35832977 | 35862686 |
| chr14 | 36314511 | 36316812 |
| chr14 | 37247102 | 37247907 |
| chr14 | 37247102 | 37270525 |
| chr14 | 37247102 | 37285447 |
| chr14 | 37247828 | 37422949 |
| chr14 | 37285317 | 37308519 |
| chr14 | 37285317 | 37369624 |
| chr14 | 37285317 | 37422949 |
| chr14 | 37369516 | 37500138 |
| chr14 | 39039030 | 39076093 |
| chr14 | 39042785 | 39085906 |
| chr14 | 39045162 | 39048729 |
| chr14 | 39045162 | 39063413 |
| chr14 | 39048651 | 39067296 |
| chr14 | 39055142 | 39063413 |
| chr14 | 39055142 | 39067296 |
| chr14 | 39055142 | 39076093 |
| chr14 | 39061764 | 39087008 |
| chr14 | 39064912 | 39085906 |
| chr14 | 39074414 | 39085906 |
| chr14 | 39074414 | 39087008 |
| chr14 | 39091476 | 39092627 |
| chr14 | 39093186 | 39096139 |
| chr14 | 39117998 | 39128348 |
| chr14 | 39128279 | 39132068 |
| chr14 | 39151745 | 39159550 |
| chr14 | 39154210 | 39159550 |
| chr14 | 39158284 | 39159550 |
| chr14 | 39177411 | 39177916 |
| chr14 | 39179090 | 39179462 |
| chr14 | 39291018 | 39295029 |
| chr14 | 39291018 | 39299986 |
| chr14 | 39313339 | 39327022 |
| chr14 | 39313339 | 39348977 |
| chr14 | 39345903 | 39348977 |
| chr14 | 44995745 | 45054549 |
| chr14 | 44999362 | 45012075 |
| chr14 | 45006007 | 45022973 |

|       |          |          |
|-------|----------|----------|
| chr14 | 45006007 | 45025872 |
| chr14 | 45006007 | 45032376 |
| chr14 | 45008912 | 45025872 |
| chr14 | 45008912 | 45027474 |
| chr14 | 45008912 | 45054549 |
| chr14 | 45011974 | 45028329 |
| chr14 | 45011974 | 45054549 |
| chr14 | 45025782 | 45028329 |
| chr14 | 45025782 | 45032376 |
| chr14 | 45027298 | 45054549 |
| chr14 | 45032222 | 45046703 |
| chr14 | 45043685 | 45046703 |
| chr14 | 45046544 | 45054549 |
| chr14 | 45095220 | 45097005 |
| chr14 | 45095220 | 45107616 |
| chr14 | 45120886 | 45130800 |
| chr14 | 45148836 | 45155459 |
| chr14 | 45148836 | 45159280 |
| chr14 | 45148836 | 45170746 |
| chr14 | 45151396 | 45154052 |
| chr14 | 45154696 | 45159280 |
| chr14 | 45154696 | 45170746 |
| chr14 | 45187780 | 45189362 |
| chr14 | 45217018 | 45218454 |
| chr14 | 45231140 | 45237721 |
| chr14 | 45235813 | 45237721 |
| chr14 | 46873432 | 46882221 |
| chr14 | 46873432 | 46920160 |
| chr14 | 46873432 | 47035304 |
| chr14 | 46920011 | 47035304 |
| chr14 | 46957373 | 47035304 |
| chr14 | 46957373 | 47097123 |
| chr14 | 47061248 | 47097123 |
| chr14 | 49647292 | 49655843 |
| chr14 | 49653989 | 49655843 |
| chr14 | 49663314 | 49665163 |
| chr14 | 49663314 | 49666413 |
| chr14 | 49663314 | 49669598 |
| chr14 | 49663314 | 49674427 |
| chr14 | 49663314 | 49683693 |
| chr14 | 49664625 | 49666413 |
| chr14 | 49664625 | 49669598 |
| chr14 | 49664625 | 49674427 |
| chr14 | 49669523 | 49674427 |
| chr14 | 49723873 | 49725769 |

|       |          |          |
|-------|----------|----------|
| chr14 | 49795790 | 49800696 |
| chr14 | 49799474 | 49800696 |
| chr14 | 49802452 | 49806133 |
| chr14 | 49802452 | 49814857 |
| chr14 | 49825866 | 49831361 |
| chr14 | 49828290 | 49832277 |
| chr14 | 49831298 | 49834449 |
| chr14 | 49832050 | 49834449 |
| chr14 | 49832050 | 49838206 |
| chr14 | 49832050 | 49840866 |
| chr14 | 49840717 | 49846265 |
| chr14 | 50129960 | 50145596 |
| chr14 | 50134122 | 50150230 |
| chr14 | 50145169 | 50145596 |
| chr14 | 50145169 | 50158646 |
| chr14 | 50145476 | 50150230 |
| chr14 | 50150007 | 50153173 |
| chr14 | 50156998 | 50174552 |
| chr14 | 50174453 | 50182606 |
| chr14 | 50180571 | 50188700 |
| chr14 | 50180571 | 50201084 |
| chr14 | 50180571 | 50204409 |
| chr14 | 50182462 | 50199855 |
| chr14 | 50265357 | 50269330 |
| chr14 | 50265357 | 50284033 |
| chr14 | 50267752 | 50303017 |
| chr14 | 50283870 | 50303017 |
| chr14 | 50321482 | 50322719 |
| chr14 | 50338946 | 50341232 |
| chr14 | 50423120 | 50435065 |
| chr14 | 50425906 | 50435065 |
| chr14 | 50434393 | 50440441 |
| chr14 | 50434393 | 50486194 |
| chr14 | 50437475 | 50440441 |
| chr14 | 50442731 | 50445194 |
| chr14 | 50442731 | 50448832 |
| chr14 | 50443938 | 50448832 |
| chr14 | 50445040 | 50448832 |
| chr14 | 50456515 | 50464133 |
| chr14 | 50462664 | 50475149 |
| chr14 | 50462664 | 50482416 |
| chr14 | 50466582 | 50476306 |
| chr14 | 50466582 | 50482416 |
| chr14 | 50466582 | 50486194 |
| chr14 | 50466582 | 50504857 |

|       |          |          |
|-------|----------|----------|
| chr14 | 50475076 | 50486194 |
| chr14 | 50475076 | 50504857 |
| chr14 | 50485577 | 50504857 |
| chr14 | 50640749 | 50645014 |
| chr14 | 50735515 | 50744365 |
| chr14 | 50738139 | 50752733 |
| chr14 | 50741581 | 50744365 |
| chr14 | 50761789 | 50766890 |
| chr14 | 50763825 | 50773095 |
| chr14 | 50770387 | 50822077 |
| chr14 | 50792711 | 50806818 |
| chr14 | 50792711 | 50822077 |
| chr14 | 50806736 | 50822077 |
| chr14 | 50908270 | 50917105 |
| chr14 | 50908270 | 50921067 |
| chr14 | 50913028 | 50917105 |
| chr14 | 50915335 | 50917105 |
| chr14 | 50920540 | 50937837 |
| chr14 | 51022834 | 51025360 |
| chr14 | 51243855 | 51247220 |
| chr14 | 51243855 | 51249765 |
| chr14 | 51689690 | 51712551 |
| chr14 | 51689690 | 51715499 |
| chr14 | 51698141 | 51702588 |
| chr14 | 52470036 | 52470680 |
| chr14 | 52470036 | 52491005 |
| chr14 | 52482229 | 52491005 |
| chr14 | 52490838 | 52542453 |
| chr14 | 52511239 | 52544371 |
| chr14 | 52536718 | 52544371 |
| chr14 | 52598271 | 52600341 |
| chr14 | 52653068 | 52658009 |
| chr14 | 52711100 | 52711524 |
| chr14 | 52757318 | 52759754 |
| chr14 | 52780678 | 52784664 |
| chr14 | 53051843 | 53093444 |
| chr14 | 53058476 | 53061201 |
| chr14 | 53058476 | 53091932 |
| chr14 | 53061125 | 53091932 |
| chr14 | 53072596 | 53091932 |
| chr14 | 53091784 | 53103856 |
| chr14 | 54401523 | 54411706 |
| chr14 | 54408744 | 54415930 |
| chr14 | 54430260 | 54436437 |
| chr14 | 54702061 | 54751537 |



|       |          |          |
|-------|----------|----------|
| chr14 | 54737023 | 54751537 |
| chr14 | 54737023 | 54764540 |
| chr14 | 54737023 | 54776540 |
| chr14 | 54737023 | 54784620 |
| chr14 | 54748814 | 54764540 |
| chr14 | 54748814 | 54776540 |
| chr14 | 54774933 | 54776540 |
| chr14 | 54859680 | 54865436 |
| chr14 | 54955560 | 54957204 |
| chr14 | 54957033 | 54957635 |
| chr14 | 54957033 | 54981696 |
| chr14 | 54966474 | 54967394 |
| chr14 | 54966474 | 54981696 |
| chr14 | 54966474 | 54987387 |
| chr14 | 54966474 | 55002185 |
| chr14 | 54981539 | 55000992 |
| chr14 | 54981539 | 55002185 |
| chr14 | 54984722 | 54987387 |
| chr14 | 54984722 | 55000992 |
| chr14 | 54984722 | 55002185 |
| chr14 | 54995602 | 55000992 |
| chr14 | 54995602 | 55002185 |
| chr14 | 55000502 | 55000992 |
| chr14 | 55008315 | 55013596 |
| chr14 | 55010308 | 55013596 |
| chr14 | 55151694 | 55154806 |
| chr14 | 55158521 | 55163075 |
| chr14 | 55175345 | 55176018 |
| chr14 | 55175893 | 55177336 |
| chr14 | 55181212 | 55183753 |
| chr14 | 55377818 | 55382191 |
| chr14 | 55612018 | 55619312 |
| chr14 | 55616516 | 55619312 |
| chr14 | 55616516 | 55628028 |
| chr14 | 55616516 | 55630097 |
| chr14 | 55648024 | 55648870 |
| chr14 | 55648024 | 55651927 |
| chr14 | 55652849 | 55659703 |
| chr14 | 55653016 | 55658614 |
| chr14 | 55653016 | 55661612 |
| chr14 | 55656041 | 55658614 |
| chr14 | 55671565 | 55671877 |
| chr14 | 56585000 | 56636598 |
| chr14 | 56618593 | 56636598 |
| chr14 | 57209566 | 57229881 |

|       |          |          |
|-------|----------|----------|
| chr14 | 57217981 | 57222416 |
| chr14 | 57229733 | 57234032 |
| chr14 | 57229733 | 57247712 |
| chr14 | 57231505 | 57233883 |
| chr14 | 57235710 | 57244359 |
| chr14 | 57237337 | 57244359 |
| chr14 | 57244164 | 57247712 |
| chr14 | 57246710 | 57247712 |
| chr14 | 58211291 | 58223856 |
| chr14 | 58213630 | 58223856 |
| chr14 | 58215204 | 58223856 |
| chr14 | 58215204 | 58230480 |
| chr14 | 58219693 | 58223856 |
| chr14 | 58247749 | 58263770 |
| chr14 | 58252118 | 58257998 |
| chr14 | 58304943 | 58318805 |
| chr14 | 58304943 | 58330169 |
| chr14 | 58318541 | 58330169 |
| chr14 | 58410842 | 58411971 |
| chr14 | 58442705 | 58444175 |
| chr14 | 58472198 | 58487166 |
| chr14 | 58482512 | 58487166 |
| chr14 | 58488620 | 58512627 |
| chr14 | 58492143 | 58512627 |
| chr14 | 59263440 | 59291306 |
| chr14 | 59487673 | 59498908 |
| chr14 | 60114699 | 60116060 |
| chr14 | 60114699 | 60125823 |
| chr14 | 60115718 | 60125251 |
| chr14 | 60115718 | 60125823 |
| chr14 | 60118328 | 60121299 |
| chr14 | 60149352 | 60153178 |
| chr14 | 60149352 | 60156152 |
| chr14 | 60796216 | 60798160 |
| chr14 | 60796216 | 60818847 |
| chr14 | 60796216 | 60879835 |
| chr14 | 60798086 | 60808428 |
| chr14 | 60798086 | 60812127 |
| chr14 | 60808324 | 60818847 |
| chr14 | 60811986 | 60879835 |
| chr14 | 61015903 | 61046167 |
| chr14 | 61015903 | 61052135 |
| chr14 | 61030444 | 61046167 |
| chr14 | 61043146 | 61046167 |
| chr14 | 61043146 | 61052135 |

|       |          |          |
|-------|----------|----------|
| chr14 | 61043449 | 61078927 |
| chr14 | 61720378 | 61721823 |
| chr14 | 61720381 | 61721823 |
| chr14 | 61720381 | 61727655 |
| chr14 | 61720381 | 61734285 |
| chr14 | 61721508 | 61721823 |
| chr14 | 61721508 | 61732524 |
| chr14 | 61721508 | 61734285 |
| chr14 | 61721508 | 61738373 |
| chr14 | 61726705 | 61727655 |
| chr14 | 61738086 | 61741188 |
| chr14 | 61740504 | 61744813 |
| chr14 | 61766875 | 61768740 |
| chr14 | 61766875 | 61778910 |
| chr14 | 61768635 | 61778140 |
| chr14 | 63391816 | 63396716 |
| chr14 | 63415139 | 63453885 |
| chr14 | 63961524 | 63967846 |
| chr14 | 63980985 | 63991115 |
| chr14 | 63982629 | 63986617 |
| chr14 | 63998913 | 64000719 |
| chr14 | 64080455 | 64081580 |
| chr14 | 64101931 | 64121061 |
| chr14 | 64186423 | 64190237 |
| chr14 | 64400792 | 64412525 |
| chr14 | 64412471 | 64418024 |
| chr14 | 64412471 | 64419925 |
| chr14 | 64412471 | 64424931 |
| chr14 | 64417887 | 64419925 |
| chr14 | 64417887 | 64424931 |
| chr14 | 64431531 | 64439172 |
| chr14 | 64431531 | 64440266 |
| chr14 | 64431531 | 64441453 |
| chr14 | 64439095 | 64440266 |
| chr14 | 64439095 | 64441453 |
| chr14 | 64440125 | 64441453 |
| chr14 | 64442053 | 64444734 |
| chr14 | 64442053 | 64448317 |
| chr14 | 64442053 | 64449622 |
| chr14 | 64442053 | 64453861 |
| chr14 | 64448216 | 64449622 |
| chr14 | 64731713 | 64732901 |
| chr14 | 65455620 | 65561766 |
| chr14 | 65455620 | 65629606 |
| chr14 | 65561336 | 65629606 |

|       |          |          |
|-------|----------|----------|
| chr14 | 65615977 | 65629606 |
| chr14 | 65721774 | 65724323 |
| chr14 | 66824473 | 66924292 |
| chr14 | 66879938 | 67023675 |
| chr14 | 66916002 | 67058786 |
| chr14 | 66916002 | 67100911 |
| chr14 | 66922665 | 66924292 |
| chr14 | 66924193 | 66965325 |
| chr14 | 66965190 | 67023675 |
| chr14 | 66965190 | 67058786 |
| chr14 | 66965190 | 67089075 |
| chr14 | 67023632 | 67122377 |
| chr14 | 67100855 | 67143449 |
| chr14 | 67110139 | 67113171 |
| chr14 | 67122255 | 67159488 |
| chr14 | 67269700 | 67279537 |
| chr14 | 67269700 | 67302118 |
| chr14 | 67269700 | 67303599 |
| chr14 | 67269700 | 67312710 |
| chr14 | 67301388 | 67303599 |
| chr14 | 67312526 | 67321259 |
| chr14 | 67340439 | 67347453 |
| chr14 | 67345767 | 67347453 |
| chr14 | 67345767 | 67350690 |
| chr14 | 67345767 | 67353040 |
| chr14 | 67557268 | 67559691 |
| chr14 | 67592634 | 67593952 |
| chr14 | 67685014 | 67690421 |
| chr14 | 67685014 | 67692593 |
| chr14 | 67685014 | 67693052 |
| chr14 | 67690211 | 67693052 |
| chr14 | 67692437 | 67693052 |
| chr14 | 67761365 | 67762819 |
| chr14 | 67767703 | 67769730 |
| chr14 | 67777558 | 67781529 |
| chr14 | 67806544 | 67809289 |
| chr14 | 67823541 | 67825577 |
| chr14 | 67823541 | 67835196 |
| chr14 | 67823541 | 67865139 |
| chr14 | 67823541 | 67887204 |
| chr14 | 67865002 | 67887204 |
| chr14 | 67885868 | 67887204 |
| chr14 | 68291883 | 68411527 |
| chr14 | 68902476 | 68921125 |
| chr14 | 68904654 | 68912242 |

|       |          |          |
|-------|----------|----------|
| chr14 | 68912155 | 68925672 |
| chr14 | 68921005 | 68925672 |
| chr14 | 69075344 | 69091887 |
| chr14 | 69075344 | 69122360 |
| chr14 | 69116365 | 69119230 |
| chr14 | 69116365 | 69122360 |
| chr14 | 69203916 | 69209803 |
| chr14 | 69203916 | 69210201 |
| chr14 | 69228815 | 69230598 |
| chr14 | 69441831 | 69442266 |
| chr14 | 69453240 | 69455866 |
| chr14 | 69703394 | 69704742 |
| chr14 | 69768137 | 69768674 |
| chr14 | 70584816 | 70591381 |
| chr14 | 70584816 | 70597777 |
| chr14 | 70592879 | 70597777 |
| chr14 | 70748828 | 70750081 |
| chr14 | 70748828 | 70761182 |
| chr14 | 70946914 | 70962331 |
| chr14 | 70946914 | 70969110 |
| chr14 | 70946914 | 70978648 |
| chr14 | 70946914 | 71076419 |
| chr14 | 70962225 | 70969110 |
| chr14 | 70962225 | 70978648 |
| chr14 | 70962225 | 70995925 |
| chr14 | 70968197 | 70978648 |
| chr14 | 70976941 | 70995925 |
| chr14 | 70976941 | 71011549 |
| chr14 | 70976941 | 71013202 |
| chr14 | 70988566 | 70995925 |
| chr14 | 70988566 | 71009724 |
| chr14 | 70988566 | 71011549 |
| chr14 | 70988566 | 71013202 |
| chr14 | 70988566 | 71023232 |
| chr14 | 71009633 | 71019162 |
| chr14 | 71009633 | 71023232 |
| chr14 | 71009633 | 71036157 |
| chr14 | 71012999 | 71036157 |
| chr14 | 71019008 | 71036157 |
| chr14 | 71026116 | 71036157 |
| chr14 | 71026771 | 71036157 |
| chr14 | 71036064 | 71052012 |
| chr14 | 71036064 | 71055562 |
| chr14 | 71036064 | 71073798 |
| chr14 | 71045132 | 71047984 |

|       |          |          |
|-------|----------|----------|
| chr14 | 71045132 | 71057724 |
| chr14 | 71045132 | 71076419 |
| chr14 | 71045132 | 71089342 |
| chr14 | 71055503 | 71057724 |
| chr14 | 71073544 | 71076419 |
| chr14 | 71105234 | 71109046 |
| chr14 | 71587570 | 71624236 |
| chr14 | 71618756 | 71624236 |
| chr14 | 71618756 | 71672622 |
| chr14 | 71658332 | 71672622 |
| chr14 | 71702380 | 71709664 |
| chr14 | 72714422 | 72731934 |
| chr14 | 72714422 | 72771893 |
| chr14 | 72723632 | 72731934 |
| chr14 | 72937970 | 72940377 |
| chr14 | 72974079 | 72975721 |
| chr14 | 72974079 | 72978969 |
| chr14 | 72993142 | 72998315 |
| chr14 | 73071626 | 73077536 |
| chr14 | 73071626 | 73088161 |
| chr14 | 73071626 | 73097100 |
| chr14 | 73076318 | 73077536 |
| chr14 | 73077368 | 73088161 |
| chr14 | 73083493 | 73088161 |
| chr14 | 73147794 | 73148094 |
| chr14 | 73147794 | 73148106 |
| chr14 | 73147794 | 73173707 |
| chr14 | 73147794 | 73186920 |
| chr14 | 73147794 | 73198129 |
| chr14 | 73147794 | 73206472 |
| chr14 | 73147794 | 73211942 |
| chr14 | 73147794 | 73217244 |
| chr14 | 73170796 | 73173707 |
| chr14 | 73170796 | 73217244 |
| chr14 | 73198030 | 73211942 |
| chr14 | 73198030 | 73217244 |
| chr14 | 73206385 | 73211942 |
| chr14 | 73249983 | 73255018 |
| chr14 | 73653169 | 73671597 |
| chr14 | 73653169 | 73687385 |
| chr14 | 73653169 | 73689515 |
| chr14 | 73654846 | 73671597 |
| chr14 | 73654846 | 73689515 |
| chr14 | 73725271 | 73729985 |
| chr14 | 73736997 | 73740255 |

|       |          |          |
|-------|----------|----------|
| chr14 | 73858815 | 73874214 |
| chr14 | 73892026 | 73893932 |
| chr14 | 73892026 | 73896534 |
| chr14 | 73892026 | 73905083 |
| chr14 | 73892026 | 73909430 |
| chr14 | 73892026 | 73923522 |
| chr14 | 73893796 | 73904110 |
| chr14 | 73896315 | 73905083 |
| chr14 | 73903959 | 73905083 |
| chr14 | 73909340 | 73921105 |
| chr14 | 73953434 | 73955928 |
| chr14 | 73955450 | 73955928 |
| chr14 | 73958146 | 73959522 |
| chr14 | 73977023 | 73983161 |
| chr14 | 74034027 | 74040645 |
| chr14 | 74091231 | 74101238 |
| chr14 | 74549862 | 74555693 |
| chr14 | 74585853 | 74603705 |
| chr14 | 74669648 | 74671483 |
| chr14 | 74683295 | 74692328 |
| chr14 | 74714871 | 74716099 |
| chr14 | 74778446 | 74782325 |
| chr14 | 74780404 | 74782325 |
| chr14 | 74780404 | 74802676 |
| chr14 | 74802555 | 74824307 |
| chr14 | 74809379 | 74810420 |
| chr14 | 74810224 | 74816265 |
| chr14 | 74889094 | 74894409 |
| chr14 | 75018828 | 75033490 |
| chr14 | 75030542 | 75038412 |
| chr14 | 75030542 | 75042477 |
| chr14 | 75032067 | 75038412 |
| chr14 | 75039910 | 75042477 |
| chr14 | 75041614 | 75042477 |
| chr14 | 75087017 | 75088641 |
| chr14 | 75097099 | 75103997 |
| chr14 | 75100991 | 75103997 |
| chr14 | 75100991 | 75107487 |
| chr14 | 75103841 | 75124223 |
| chr14 | 75109684 | 75110371 |
| chr14 | 75109684 | 75118935 |
| chr14 | 75109684 | 75124223 |
| chr14 | 75117194 | 75124223 |
| chr14 | 75663054 | 75734050 |
| chr14 | 75707017 | 75720703 |

|       |          |          |
|-------|----------|----------|
| chr14 | 75717860 | 75720703 |
| chr14 | 75717860 | 75735289 |
| chr14 | 75732337 | 75735289 |
| chr14 | 75745094 | 75752955 |
| chr14 | 75771733 | 75793100 |
| chr14 | 75775483 | 75776850 |
| chr14 | 75863666 | 75902224 |
| chr14 | 75882684 | 75902224 |
| chr14 | 76154353 | 76176690 |
| chr14 | 76154353 | 76195972 |
| chr14 | 76166662 | 76176690 |
| chr14 | 76166662 | 76178042 |
| chr14 | 76166662 | 76180849 |
| chr14 | 76166662 | 76195972 |
| chr14 | 76171842 | 76176690 |
| chr14 | 76171842 | 76178042 |
| chr14 | 76171842 | 76180849 |
| chr14 | 76176622 | 76195972 |
| chr14 | 76803370 | 76809643 |
| chr14 | 77296163 | 77304800 |
| chr14 | 77296163 | 77306441 |
| chr14 | 77442559 | 77454102 |
| chr14 | 77444248 | 77454102 |
| chr14 | 77462159 | 77465667 |
| chr14 | 77464597 | 77465667 |
| chr14 | 77464597 | 77468508 |
| chr14 | 77552095 | 77562489 |
| chr14 | 77552095 | 77576915 |
| chr14 | 77557040 | 77576915 |
| chr14 | 77570383 | 77576915 |
| chr14 | 77570383 | 77579109 |
| chr14 | 77576766 | 77579109 |
| chr14 | 77675655 | 77679970 |
| chr14 | 77720710 | 77723277 |
| chr14 | 77720710 | 77737075 |
| chr14 | 77730987 | 77736006 |
| chr14 | 77732484 | 77736006 |
| chr14 | 77738777 | 77739061 |
| chr14 | 77751318 | 77755120 |
| chr14 | 77818967 | 77822518 |
| chr14 | 80504911 | 80530886 |
| chr14 | 80526868 | 80580423 |
| chr14 | 80743074 | 80761613 |
| chr14 | 80743074 | 80778046 |
| chr14 | 80756891 | 80778046 |



|       |          |          |
|-------|----------|----------|
| chr14 | 80831142 | 80838278 |
| chr14 | 80831142 | 80840768 |
| chr14 | 80862756 | 80900029 |
| chr14 | 80862756 | 80906081 |
| chr14 | 80895717 | 80906081 |
| chr14 | 81185530 | 81216514 |
| chr14 | 81196107 | 81216514 |
| chr14 | 81485671 | 81490465 |
| chr14 | 81495080 | 81499662 |
| chr14 | 81495080 | 81502883 |
| chr14 | 81497891 | 81502883 |
| chr14 | 81502720 | 81506241 |
| chr14 | 87963383 | 87988523 |
| chr14 | 88496412 | 88508020 |
| chr14 | 88496412 | 88517261 |
| chr14 | 88496412 | 88550619 |
| chr14 | 88500782 | 88501368 |
| chr14 | 88500782 | 88508020 |
| chr14 | 88563650 | 88578140 |
| chr14 | 88574692 | 88578140 |
| chr14 | 88574692 | 88607363 |
| chr14 | 88575839 | 88578140 |
| chr14 | 88657375 | 88658388 |
| chr14 | 88657375 | 88665489 |
| chr14 | 88657375 | 88696952 |
| chr14 | 88712270 | 88715195 |
| chr14 | 88726540 | 88746283 |
| chr14 | 88726540 | 88754671 |
| chr14 | 88736363 | 88746283 |
| chr14 | 88736363 | 88754671 |
| chr14 | 88744022 | 88754671 |
| chr14 | 88746184 | 88754671 |
| chr14 | 88841424 | 88872452 |
| chr14 | 88852970 | 88861332 |
| chr14 | 88870058 | 88872452 |
| chr14 | 89931540 | 89932627 |
| chr14 | 89963107 | 89971271 |
| chr14 | 89963107 | 89993483 |
| chr14 | 89966146 | 89971271 |
| chr14 | 89966146 | 89993483 |
| chr14 | 89966146 | 90019418 |
| chr14 | 89971174 | 89985210 |
| chr14 | 89975780 | 89993483 |
| chr14 | 89980539 | 89985210 |
| chr14 | 89980539 | 89993483 |

|       |          |          |
|-------|----------|----------|
| chr14 | 89984515 | 89993483 |
| chr14 | 89984515 | 90019418 |
| chr14 | 90019315 | 90033214 |
| chr14 | 90286353 | 90304382 |
| chr14 | 90312393 | 90318113 |
| chr14 | 90400064 | 90403968 |
| chr14 | 90403861 | 90404514 |
| chr14 | 90578105 | 90618045 |
| chr14 | 90593485 | 90618045 |
| chr14 | 90644047 | 90647023 |
| chr14 | 90644047 | 90655110 |
| chr14 | 90644047 | 90658387 |
| chr14 | 90644047 | 90680535 |
| chr14 | 90644047 | 90786328 |
| chr14 | 90676522 | 90689712 |
| chr14 | 90676522 | 90695578 |
| chr14 | 90676522 | 90730196 |
| chr14 | 90730074 | 90744922 |
| chr14 | 90730074 | 90786328 |
| chr14 | 90780737 | 90786328 |
| chr14 | 90875200 | 90894583 |
| chr14 | 90920205 | 90947550 |
| chr14 | 90943077 | 90947550 |
| chr14 | 90943077 | 90978524 |
| chr14 | 90943077 | 91001159 |
| chr14 | 90947434 | 91001159 |
| chr14 | 90978305 | 91001159 |
| chr14 | 91289104 | 91300070 |
| chr14 | 91473032 | 91476986 |
| chr14 | 91481575 | 91485730 |
| chr14 | 91481575 | 91490802 |
| chr14 | 92007639 | 92011072 |
| chr14 | 92070934 | 92082466 |
| chr14 | 92088729 | 92096838 |
| chr14 | 92093251 | 92096838 |
| chr14 | 92096092 | 92096838 |
| chr14 | 92126121 | 92143294 |
| chr14 | 92142163 | 92143294 |
| chr14 | 92555750 | 92577477 |
| chr14 | 92651581 | 92685150 |
| chr14 | 92716135 | 92717461 |
| chr14 | 92806735 | 92809519 |
| chr14 | 92809299 | 92816421 |
| chr14 | 92809299 | 92837449 |
| chr14 | 92958200 | 92962849 |

|       |          |          |
|-------|----------|----------|
| chr14 | 92993879 | 93076619 |
| chr14 | 93212031 | 93220411 |
| chr14 | 93214928 | 93215281 |
| chr14 | 93219211 | 93220411 |
| chr14 | 93220248 | 93222374 |
| chr14 | 93245824 | 93263993 |
| chr14 | 93257194 | 93263993 |
| chr14 | 93261601 | 93296157 |
| chr14 | 93293857 | 93296157 |
| chr14 | 94057821 | 94079747 |
| chr14 | 94241787 | 94242408 |
| chr14 | 95124195 | 95141748 |
| chr14 | 95132514 | 95141748 |
| chr14 | 95140658 | 95141748 |
| chr14 | 96289655 | 96291682 |
| chr14 | 96328346 | 96329634 |
| chr14 | 96341521 | 96343281 |
| chr14 | 96341521 | 96347341 |
| chr14 | 96520054 | 96521072 |
| chr14 | 96520054 | 96525391 |
| chr14 | 96520054 | 96528006 |
| chr14 | 96525309 | 96532649 |
| chr14 | 96527429 | 96532649 |
| chr14 | 96527429 | 96547918 |
| chr14 | 96542242 | 96552622 |
| chr14 | 96833466 | 96837817 |
| chr14 | 96833466 | 96847344 |
| chr14 | 96833466 | 96853166 |
| chr14 | 96833466 | 96856586 |
| chr14 | 96833466 | 96860735 |
| chr14 | 96833466 | 96876120 |
| chr14 | 96846094 | 96856586 |
| chr14 | 96846094 | 96860735 |
| chr14 | 96846094 | 96876120 |
| chr14 | 96847256 | 96860735 |
| chr14 | 96852830 | 96856586 |
| chr14 | 96852830 | 96860735 |
| chr14 | 96853073 | 96860735 |
| chr14 | 99412950 | 99465813 |
| chr14 | 99458278 | 99463578 |
| chr14 | 99458278 | 99465813 |
| chr14 | 99461191 | 99463578 |
| chr14 | 99492625 | 99503644 |
| chr14 | 99850852 | 99865646 |
| chr14 | 99914178 | 99914697 |

|       |           |           |
|-------|-----------|-----------|
| chr15 | 100132006 | 100155320 |
| chr15 | 100132006 | 100199423 |
| chr15 | 100132006 | 100281401 |
| chr15 | 100152611 | 100155320 |
| chr15 | 100152611 | 100199423 |
| chr15 | 100199317 | 100331054 |
| chr15 | 100254135 | 100281401 |
| chr15 | 100281228 | 100331054 |
| chr15 | 100609706 | 100612427 |
| chr15 | 100609706 | 100630042 |
| chr15 | 100885266 | 100887712 |
| chr15 | 100885266 | 100898185 |
| chr15 | 100885266 | 100905687 |
| chr15 | 100892509 | 100894082 |
| chr15 | 100900574 | 100905687 |
| chr15 | 100983527 | 100989398 |
| chr15 | 100983527 | 101029232 |
| chr15 | 101008836 | 101015402 |
| chr15 | 101054945 | 101058141 |
| chr15 | 101284966 | 101293172 |
| chr15 | 101684074 | 101686062 |
| chr15 | 101703858 | 101714963 |
| chr15 | 20461191  | 20466370  |
| chr15 | 22516875  | 22539247  |
| chr15 | 22572928  | 22574073  |
| chr15 | 22839654  | 22860789  |
| chr15 | 22843101  | 22845267  |
| chr15 | 22845145  | 22853268  |
| chr15 | 22872824  | 22873729  |
| chr15 | 22879912  | 22883011  |
| chr15 | 22909193  | 22910813  |
| chr15 | 22909193  | 22912275  |
| chr15 | 22914725  | 22932340  |
| chr15 | 22925981  | 22932340  |
| chr15 | 22925981  | 22933893  |
| chr15 | 22927905  | 22933893  |
| chr15 | 22937103  | 22947291  |
| chr15 | 22943172  | 22947291  |
| chr15 | 22944557  | 22947291  |
| chr15 | 23008698  | 23010133  |
| chr15 | 23008698  | 23019334  |
| chr15 | 23008698  | 23022161  |
| chr15 | 23021958  | 23024830  |
| chr15 | 23023946  | 23037152  |
| chr15 | 23026115  | 23037152  |

|       |          |          |
|-------|----------|----------|
| chr15 | 23030884 | 23037152 |
| chr15 | 24962113 | 24968082 |
| chr15 | 24975357 | 24977029 |
| chr15 | 24977777 | 24978318 |
| chr15 | 25340084 | 25360527 |
| chr15 | 25354352 | 25360527 |
| chr15 | 25354352 | 25375763 |
| chr15 | 25375464 | 25405502 |
| chr15 | 25405460 | 25411971 |
| chr15 | 28141431 | 28141846 |
| chr15 | 28141431 | 28142393 |
| chr15 | 28141431 | 28152830 |
| chr15 | 28143872 | 28146344 |
| chr15 | 28167686 | 28169655 |
| chr15 | 28190964 | 28192151 |
| chr15 | 28190964 | 28196569 |
| chr15 | 28229194 | 28230500 |
| chr15 | 28229673 | 28233341 |
| chr15 | 28245880 | 28246897 |
| chr15 | 28245880 | 28248736 |
| chr15 | 28245880 | 28257261 |
| chr15 | 28245880 | 28263169 |
| chr15 | 28248551 | 28254518 |
| chr15 | 28254339 | 28256317 |
| chr15 | 28254339 | 28257261 |
| chr15 | 28260776 | 28263169 |
| chr15 | 28260776 | 28265974 |
| chr15 | 28265617 | 28280287 |
| chr15 | 28270694 | 28280287 |
| chr15 | 28280067 | 28293022 |
| chr15 | 28280067 | 28321464 |
| chr15 | 28292887 | 28299516 |
| chr15 | 29098489 | 29114016 |
| chr15 | 29708558 | 29711000 |
| chr15 | 29737263 | 29742781 |
| chr15 | 29761138 | 29762438 |
| chr15 | 29761138 | 29773357 |
| chr15 | 29761138 | 29800702 |
| chr15 | 29766265 | 29772166 |
| chr15 | 29766265 | 29773357 |
| chr15 | 29766265 | 29800702 |
| chr15 | 29772063 | 29773357 |
| chr15 | 29772063 | 29800702 |
| chr15 | 30908117 | 30914091 |
| chr15 | 30908117 | 30918295 |

|       |          |          |
|-------|----------|----------|
| chr15 | 30910613 | 30914091 |
| chr15 | 30913857 | 30920653 |
| chr15 | 30958862 | 30976955 |
| chr15 | 30967919 | 30976955 |
| chr15 | 30974313 | 30976955 |
| chr15 | 32526812 | 32528701 |
| chr15 | 32620107 | 32628802 |
| chr15 | 34145397 | 34148750 |
| chr15 | 34145397 | 34154684 |
| chr15 | 34148631 | 34153069 |
| chr15 | 34148631 | 34163690 |
| chr15 | 34152789 | 34163690 |
| chr15 | 34235180 | 34250355 |
| chr15 | 34250297 | 34251057 |
| chr15 | 34398633 | 34407735 |
| chr15 | 34860041 | 34867609 |
| chr15 | 34882501 | 34886661 |
| chr15 | 34890214 | 34893773 |
| chr15 | 34890214 | 34897705 |
| chr15 | 34896896 | 34897705 |
| chr15 | 34900621 | 34932434 |
| chr15 | 34915037 | 34927138 |
| chr15 | 34915037 | 34930371 |
| chr15 | 34920331 | 34938813 |
| chr15 | 34927034 | 34932434 |
| chr15 | 34927034 | 34934635 |
| chr15 | 34927034 | 34948384 |
| chr15 | 34930257 | 34948384 |
| chr15 | 34932317 | 34942080 |
| chr15 | 34940898 | 34944428 |
| chr15 | 34948263 | 34964290 |
| chr15 | 35410834 | 35454820 |
| chr15 | 35450684 | 35454820 |
| chr15 | 35538273 | 35542507 |
| chr15 | 36691684 | 36709961 |
| chr15 | 38299372 | 38324809 |
| chr15 | 38299372 | 38339895 |
| chr15 | 38465268 | 38474298 |
| chr15 | 38470226 | 38474298 |
| chr15 | 39713443 | 39741900 |
| chr15 | 39763820 | 39776531 |
| chr15 | 39939504 | 39955768 |
| chr15 | 39996963 | 40008195 |
| chr15 | 39996963 | 40011346 |
| chr15 | 39998730 | 40001224 |

|       |          |          |
|-------|----------|----------|
| chr15 | 40009613 | 40019200 |
| chr15 | 40170061 | 40176673 |
| chr15 | 40170061 | 40183883 |
| chr15 | 40170061 | 40185642 |
| chr15 | 40176476 | 40196774 |
| chr15 | 40183713 | 40185642 |
| chr15 | 40183713 | 40200980 |
| chr15 | 40183713 | 40210210 |
| chr15 | 40185164 | 40185642 |
| chr15 | 40208636 | 40218562 |
| chr15 | 40383227 | 40387206 |
| chr15 | 40383227 | 40392023 |
| chr15 | 40386361 | 40389929 |
| chr15 | 40386361 | 40392023 |
| chr15 | 40387158 | 40392023 |
| chr15 | 40602914 | 40610297 |
| chr15 | 40602914 | 40611511 |
| chr15 | 40602914 | 40615378 |
| chr15 | 40605109 | 40611511 |
| chr15 | 40608846 | 40619011 |
| chr15 | 40650300 | 40652105 |
| chr15 | 40698756 | 40701201 |
| chr15 | 40698756 | 40706294 |
| chr15 | 40698756 | 40709116 |
| chr15 | 40706176 | 40709116 |
| chr15 | 40706176 | 40728824 |
| chr15 | 40709024 | 40728824 |
| chr15 | 40709024 | 40729974 |
| chr15 | 40737123 | 40738042 |
| chr15 | 40737123 | 40745259 |
| chr15 | 40744046 | 40745259 |
| chr15 | 40744046 | 40752178 |
| chr15 | 40773726 | 40779997 |
| chr15 | 40982861 | 40987974 |
| chr15 | 40985337 | 40987974 |
| chr15 | 40987090 | 40987974 |
| chr15 | 40997528 | 41021125 |
| chr15 | 41005592 | 41027736 |
| chr15 | 41016087 | 41027736 |
| chr15 | 41016087 | 41096353 |
| chr15 | 41020899 | 41027736 |
| chr15 | 41047407 | 41050102 |
| chr15 | 41047407 | 41054014 |
| chr15 | 41055246 | 41056706 |
| chr15 | 41069569 | 41070547 |

|       |          |          |
|-------|----------|----------|
| chr15 | 41069569 | 41072058 |
| chr15 | 41069569 | 41074565 |
| chr15 | 41069569 | 41079904 |
| chr15 | 41071848 | 41074565 |
| chr15 | 41073427 | 41079904 |
| chr15 | 41073427 | 41081073 |
| chr15 | 41079700 | 41081073 |
| chr15 | 41081019 | 41085583 |
| chr15 | 41081019 | 41087682 |
| chr15 | 41085368 | 41087682 |
| chr15 | 41085368 | 41092182 |
| chr15 | 41085368 | 41096353 |
| chr15 | 41095600 | 41096353 |
| chr15 | 41243666 | 41270618 |
| chr15 | 41356038 | 41358258 |
| chr15 | 41356038 | 41365589 |
| chr15 | 41356038 | 41371684 |
| chr15 | 41356038 | 41375828 |
| chr15 | 41356038 | 41377304 |
| chr15 | 41371526 | 41377304 |
| chr15 | 41375711 | 41377304 |
| chr15 | 41394858 | 41397140 |
| chr15 | 41438320 | 41453048 |
| chr15 | 41452900 | 41457876 |
| chr15 | 41464770 | 41471349 |
| chr15 | 41466140 | 41471349 |
| chr15 | 41471171 | 41477515 |
| chr15 | 41474619 | 41477515 |
| chr15 | 41523770 | 41527068 |
| chr15 | 41529469 | 41529979 |
| chr15 | 41529469 | 41531202 |
| chr15 | 41562547 | 41565141 |
| chr15 | 41668827 | 41707859 |
| chr15 | 41696074 | 41698941 |
| chr15 | 41696074 | 41699159 |
| chr15 | 41696074 | 41708208 |
| chr15 | 41696074 | 41713496 |
| chr15 | 41707727 | 41713496 |
| chr15 | 41713150 | 41729349 |
| chr15 | 41727179 | 41729349 |
| chr15 | 41734521 | 41736698 |
| chr15 | 41748636 | 41750615 |
| chr15 | 41754436 | 41760529 |
| chr15 | 41754436 | 41762362 |
| chr15 | 41799822 | 41813101 |



|       |          |          |
|-------|----------|----------|
| chr15 | 41810882 | 41812127 |
| chr15 | 41810882 | 41813101 |
| chr15 | 42161681 | 42165113 |
| chr15 | 42233212 | 42268032 |
| chr15 | 42236319 | 42268032 |
| chr15 | 42244049 | 42268032 |
| chr15 | 42260957 | 42268032 |
| chr15 | 42274167 | 42308318 |
| chr15 | 42287690 | 42329449 |
| chr15 | 42321784 | 42329449 |
| chr15 | 42321784 | 42330672 |
| chr15 | 42338388 | 42340754 |
| chr15 | 42444201 | 42444981 |
| chr15 | 42547260 | 42548456 |
| chr15 | 42559338 | 42563857 |
| chr15 | 42583345 | 42585637 |
| chr15 | 42634855 | 42638812 |
| chr15 | 42651015 | 42663917 |
| chr15 | 42661157 | 42669337 |
| chr15 | 42662793 | 42669337 |
| chr15 | 42665252 | 42669337 |
| chr15 | 42726309 | 42735178 |
| chr15 | 42775134 | 42817097 |
| chr15 | 42775134 | 42840433 |
| chr15 | 42783418 | 42817097 |
| chr15 | 42783418 | 42840433 |
| chr15 | 42794643 | 42817097 |
| chr15 | 42794643 | 42840433 |
| chr15 | 42794643 | 42872758 |
| chr15 | 42810613 | 42817097 |
| chr15 | 42810613 | 42830078 |
| chr15 | 42810613 | 42840433 |
| chr15 | 42810613 | 42872758 |
| chr15 | 42817031 | 42830078 |
| chr15 | 42817031 | 42840433 |
| chr15 | 42827927 | 42830078 |
| chr15 | 42827927 | 42840433 |
| chr15 | 42827927 | 42878684 |
| chr15 | 42829937 | 42840433 |
| chr15 | 42872610 | 42878684 |
| chr15 | 42950261 | 42960701 |
| chr15 | 42950261 | 42966286 |
| chr15 | 42950261 | 42970607 |
| chr15 | 42958012 | 42970607 |
| chr15 | 42966152 | 42970607 |

|       |          |          |
|-------|----------|----------|
| chr15 | 42983896 | 43025429 |
| chr15 | 42988818 | 43007284 |
| chr15 | 43002554 | 43022801 |
| chr15 | 43003836 | 43025429 |
| chr15 | 43007078 | 43025429 |
| chr15 | 43015687 | 43017181 |
| chr15 | 43015687 | 43022801 |
| chr15 | 43015687 | 43025429 |
| chr15 | 43017094 | 43025429 |
| chr15 | 43021274 | 43025429 |
| chr15 | 43021274 | 43048491 |
| chr15 | 43024828 | 43025429 |
| chr15 | 43047160 | 43048491 |
| chr15 | 43054741 | 43060114 |
| chr15 | 43054741 | 43086240 |
| chr15 | 43134256 | 43138619 |
| chr15 | 43134256 | 43160794 |
| chr15 | 43135511 | 43160794 |
| chr15 | 43146492 | 43169677 |
| chr15 | 43146492 | 43181299 |
| chr15 | 43148754 | 43160794 |
| chr15 | 43333310 | 43335826 |
| chr15 | 43335695 | 43343075 |
| chr15 | 43335695 | 43349045 |
| chr15 | 43376097 | 43377067 |
| chr15 | 43376097 | 43377903 |
| chr15 | 43377846 | 43383504 |
| chr15 | 43380083 | 43383504 |
| chr15 | 43380083 | 43386330 |
| chr15 | 43385790 | 43404552 |
| chr15 | 43398037 | 43401850 |
| chr15 | 43398040 | 43401850 |
| chr15 | 43400043 | 43401850 |
| chr15 | 43407942 | 43420735 |
| chr15 | 43415593 | 43416416 |
| chr15 | 43432193 | 43438416 |
| chr15 | 43438323 | 43447485 |
| chr15 | 43441525 | 43447485 |
| chr15 | 43446386 | 43447485 |
| chr15 | 43469857 | 43477759 |
| chr15 | 43469857 | 43481022 |
| chr15 | 43479396 | 43481022 |
| chr15 | 43753823 | 43756766 |
| chr15 | 43753823 | 43761531 |
| chr15 | 43756648 | 43763206 |

|       |          |          |
|-------|----------|----------|
| chr15 | 43761423 | 43763206 |
| chr15 | 43765449 | 43766910 |
| chr15 | 43768488 | 43769646 |
| chr15 | 43768488 | 43770329 |
| chr15 | 43768488 | 43770580 |
| chr15 | 43814500 | 43815074 |
| chr15 | 43827964 | 43835150 |
| chr15 | 43835060 | 43844054 |
| chr15 | 43836160 | 43839728 |
| chr15 | 43836160 | 43844054 |
| chr15 | 43842414 | 43844054 |
| chr15 | 43843900 | 43857163 |
| chr15 | 44322964 | 44332078 |
| chr15 | 44322964 | 44338317 |
| chr15 | 44328684 | 44332078 |
| chr15 | 44328684 | 44338317 |
| chr15 | 44328684 | 44380976 |
| chr15 | 44331987 | 44338317 |
| chr15 | 44331987 | 44380976 |
| chr15 | 44337762 | 44338317 |
| chr15 | 44379689 | 44380976 |
| chr15 | 44458990 | 44490999 |
| chr15 | 44484223 | 44486700 |
| chr15 | 44484223 | 44490999 |
| chr15 | 44484223 | 44499813 |
| chr15 | 44496379 | 44497138 |
| chr15 | 44514597 | 44519295 |
| chr15 | 44569397 | 44570658 |
| chr15 | 44572682 | 44575041 |
| chr15 | 44592330 | 44596943 |
| chr15 | 44595258 | 44596943 |
| chr15 | 44606024 | 44608605 |
| chr15 | 44606024 | 44610985 |
| chr15 | 44615362 | 44620403 |
| chr15 | 44626330 | 44629388 |
| chr15 | 44626330 | 44659303 |
| chr15 | 44633504 | 44660616 |
| chr15 | 44648865 | 44652266 |
| chr15 | 44648865 | 44660616 |
| chr15 | 45040407 | 45043421 |
| chr15 | 45068180 | 45069052 |
| chr15 | 45175218 | 45178306 |
| chr15 | 45405319 | 45410530 |
| chr15 | 45405319 | 45418682 |
| chr15 | 45417268 | 45418682 |

|       |          |          |
|-------|----------|----------|
| chr15 | 45488840 | 45490881 |
| chr15 | 48596282 | 48613092 |
| chr15 | 48610727 | 48644950 |
| chr15 | 48767059 | 48769081 |
| chr15 | 48772486 | 48791376 |
| chr15 | 48797947 | 48805656 |
| chr15 | 48996366 | 49019552 |
| chr15 | 49011730 | 49017628 |
| chr15 | 49012647 | 49028682 |
| chr15 | 49027364 | 49037769 |
| chr15 | 49137149 | 49139653 |
| chr15 | 49201161 | 49239367 |
| chr15 | 49235850 | 49239367 |
| chr15 | 49235850 | 49283718 |
| chr15 | 49235850 | 49292537 |
| chr15 | 49625112 | 49634794 |
| chr15 | 49632158 | 49634794 |
| chr15 | 50300788 | 50301368 |
| chr15 | 50300788 | 50304133 |
| chr15 | 50300788 | 50309798 |
| chr15 | 50303965 | 50309798 |
| chr15 | 50439008 | 50449485 |
| chr15 | 50441348 | 50465191 |
| chr15 | 50449399 | 50459162 |
| chr15 | 50449399 | 50462322 |
| chr15 | 50458999 | 50462322 |
| chr15 | 50458999 | 50465191 |
| chr15 | 50458999 | 50471795 |
| chr15 | 50462279 | 50471795 |
| chr15 | 50465046 | 50471795 |
| chr15 | 50465046 | 50477499 |
| chr15 | 50476848 | 50498728 |
| chr15 | 50570103 | 50575789 |
| chr15 | 50574273 | 50575789 |
| chr15 | 50574636 | 50575789 |
| chr15 | 50574851 | 50575789 |
| chr15 | 50583088 | 50592626 |
| chr15 | 50586391 | 50592626 |
| chr15 | 50607199 | 50619798 |
| chr15 | 50613706 | 50614263 |
| chr15 | 50613706 | 50628249 |
| chr15 | 50613706 | 50632992 |
| chr15 | 50619744 | 50632992 |
| chr15 | 50631416 | 50632992 |
| chr15 | 50631416 | 50634556 |

|       |          |          |
|-------|----------|----------|
| chr15 | 50631416 | 50648885 |
| chr15 | 50631416 | 50663046 |
| chr15 | 50634381 | 50639548 |
| chr15 | 50637421 | 50639548 |
| chr15 | 50643339 | 50648885 |
| chr15 | 50643339 | 50663046 |
| chr15 | 50648686 | 50657819 |
| chr15 | 50648686 | 50663046 |
| chr15 | 50726320 | 50739828 |
| chr15 | 50732602 | 50749746 |
| chr15 | 50736100 | 50739828 |
| chr15 | 50739679 | 50748870 |
| chr15 | 50747494 | 50748870 |
| chr15 | 50747494 | 50749746 |
| chr15 | 50912077 | 50930971 |
| chr15 | 50941441 | 50950169 |
| chr15 | 50948019 | 50950169 |
| chr15 | 50948019 | 50958794 |
| chr15 | 50948019 | 50968377 |
| chr15 | 50958491 | 50968377 |
| chr15 | 51394834 | 51401743 |
| chr15 | 51451644 | 51455228 |
| chr15 | 51456065 | 51463496 |
| chr15 | 51463378 | 51464876 |
| chr15 | 51507133 | 51517167 |
| chr15 | 51535662 | 51538452 |
| chr15 | 51535662 | 51547408 |
| chr15 | 51542332 | 51576181 |
| chr15 | 51563380 | 51568558 |
| chr15 | 51563380 | 51576181 |
| chr15 | 51773711 | 51777018 |
| chr15 | 51781043 | 51782828 |
| chr15 | 51862810 | 51869373 |
| chr15 | 51869216 | 51889145 |
| chr15 | 51887588 | 51893945 |
| chr15 | 51887588 | 51896526 |
| chr15 | 51896418 | 51902036 |
| chr15 | 51900154 | 51902036 |
| chr15 | 51959898 | 51960733 |
| chr15 | 52045829 | 52050137 |
| chr15 | 52049992 | 52061500 |
| chr15 | 52133377 | 52141272 |
| chr15 | 52405286 | 52410476 |
| chr15 | 52405286 | 52433285 |
| chr15 | 52425829 | 52433285 |

|       |          |          |
|-------|----------|----------|
| chr15 | 52584744 | 52593736 |
| chr15 | 55223888 | 55234956 |
| chr15 | 55223888 | 55238491 |
| chr15 | 55376948 | 55378376 |
| chr15 | 55432496 | 55450367 |
| chr15 | 55439471 | 55450367 |
| chr15 | 55624341 | 55627128 |
| chr15 | 55624341 | 55673676 |
| chr15 | 55627007 | 55629004 |
| chr15 | 55637169 | 55638676 |
| chr15 | 55679285 | 55740684 |
| chr15 | 55680053 | 55680628 |
| chr15 | 55834037 | 55847034 |
| chr15 | 55850541 | 55856196 |
| chr15 | 55860406 | 55874008 |
| chr15 | 55862912 | 55874008 |
| chr15 | 55869578 | 55874008 |
| chr15 | 55924645 | 55966546 |
| chr15 | 55951375 | 55966546 |
| chr15 | 56142777 | 56179303 |
| chr15 | 56383951 | 56412436 |
| chr15 | 56388471 | 56412436 |
| chr15 | 56391242 | 56394834 |
| chr15 | 56394164 | 56394834 |
| chr15 | 56689040 | 56707306 |
| chr15 | 56700932 | 56707306 |
| chr15 | 56919891 | 56921098 |
| chr15 | 56919891 | 57063823 |
| chr15 | 57063749 | 57091891 |
| chr15 | 57091788 | 57197825 |
| chr15 | 57166401 | 57197825 |
| chr15 | 57197772 | 57282598 |
| chr15 | 57231151 | 57234107 |
| chr15 | 58610296 | 58611991 |
| chr15 | 58610296 | 58633359 |
| chr15 | 58611807 | 58717727 |
| chr15 | 58621470 | 58627883 |
| chr15 | 58621470 | 58643978 |
| chr15 | 58621470 | 58646204 |
| chr15 | 58621470 | 58665197 |
| chr15 | 58621470 | 58679282 |
| chr15 | 58621470 | 58682314 |
| chr15 | 58627699 | 58682314 |
| chr15 | 58633195 | 58717727 |
| chr15 | 58640776 | 58682314 |

|       |          |          |
|-------|----------|----------|
| chr15 | 58665096 | 58717727 |
| chr15 | 58802312 | 58847470 |
| chr15 | 58886974 | 58887540 |
| chr15 | 58912562 | 58913696 |
| chr15 | 58912562 | 58916999 |
| chr15 | 59030803 | 59058550 |
| chr15 | 59030803 | 59076215 |
| chr15 | 59030803 | 59085785 |
| chr15 | 59052304 | 59058550 |
| chr15 | 59052304 | 59067083 |
| chr15 | 59080935 | 59089759 |
| chr15 | 59084128 | 59085785 |
| chr15 | 59084128 | 59089759 |
| chr15 | 59084128 | 59092640 |
| chr15 | 59107321 | 59107670 |
| chr15 | 59153589 | 59214720 |
| chr15 | 59173745 | 59174240 |
| chr15 | 59174125 | 59214720 |
| chr15 | 59195460 | 59214720 |
| chr15 | 59195460 | 59218087 |
| chr15 | 59202325 | 59214720 |
| chr15 | 59202325 | 59218087 |
| chr15 | 59205399 | 59218087 |
| chr15 | 59217890 | 59256378 |
| chr15 | 59256283 | 59272449 |
| chr15 | 59458549 | 59460206 |
| chr15 | 59507212 | 59516840 |
| chr15 | 59671182 | 59672739 |
| chr15 | 59672636 | 59682514 |
| chr15 | 59677910 | 59682514 |
| chr15 | 60355918 | 60364523 |
| chr15 | 60355918 | 60382441 |
| chr15 | 60357145 | 60382441 |
| chr15 | 60360940 | 60382441 |
| chr15 | 60360940 | 60386086 |
| chr15 | 60431933 | 60448145 |
| chr15 | 60453602 | 60466713 |
| chr15 | 60455002 | 60468322 |
| chr15 | 61910176 | 61912004 |
| chr15 | 61913310 | 61927320 |
| chr15 | 61927090 | 61936750 |
| chr15 | 61929500 | 61931259 |
| chr15 | 61949442 | 61954554 |
| chr15 | 61972624 | 61981478 |
| chr15 | 61990999 | 61991802 |

|       |          |          |
|-------|----------|----------|
| chr15 | 61990999 | 62035052 |
| chr15 | 62007307 | 62013992 |
| chr15 | 62012106 | 62044255 |
| chr15 | 62020478 | 62044255 |
| chr15 | 62033440 | 62044255 |
| chr15 | 62675216 | 62692941 |
| chr15 | 63249644 | 63259692 |
| chr15 | 63255506 | 63259692 |
| chr15 | 63529013 | 63537156 |
| chr15 | 63529013 | 63563008 |
| chr15 | 63529013 | 63574403 |
| chr15 | 63529013 | 63589011 |
| chr15 | 63532646 | 63537156 |
| chr15 | 63532646 | 63556748 |
| chr15 | 63532646 | 63558188 |
| chr15 | 63532646 | 63559970 |
| chr15 | 63532646 | 63563008 |
| chr15 | 63532646 | 63574403 |
| chr15 | 63537024 | 63558188 |
| chr15 | 63537024 | 63574403 |
| chr15 | 63553714 | 63558188 |
| chr15 | 63553714 | 63559970 |
| chr15 | 63553714 | 63563008 |
| chr15 | 63553714 | 63570579 |
| chr15 | 63553714 | 63574403 |
| chr15 | 63558105 | 63559970 |
| chr15 | 63559856 | 63563008 |
| chr15 | 63570432 | 63574403 |
| chr15 | 63622814 | 63624327 |
| chr15 | 63628676 | 63630635 |
| chr15 | 63648068 | 63659936 |
| chr15 | 63651252 | 63659936 |
| chr15 | 63652413 | 63658718 |
| chr15 | 63655741 | 63658718 |
| chr15 | 63659735 | 63666472 |
| chr15 | 63664469 | 63666472 |
| chr15 | 63693963 | 63716473 |
| chr15 | 63696123 | 63716473 |
| chr15 | 63696123 | 63749791 |
| chr15 | 63698727 | 63716473 |
| chr15 | 63706779 | 63716473 |
| chr15 | 63712774 | 63716473 |
| chr15 | 63718573 | 63734849 |
| chr15 | 63727646 | 63749791 |
| chr15 | 63732923 | 63755325 |



|       |          |          |
|-------|----------|----------|
| chr15 | 63732923 | 63756748 |
| chr15 | 63746917 | 63747858 |
| chr15 | 63747723 | 63756748 |
| chr15 | 63758174 | 63775649 |
| chr15 | 63764095 | 63775649 |
| chr15 | 64112572 | 64118854 |
| chr15 | 64112572 | 64123546 |
| chr15 | 64118116 | 64118854 |
| chr15 | 64118116 | 64123546 |
| chr15 | 64127173 | 64131892 |
| chr15 | 64180347 | 64216713 |
| chr15 | 64203081 | 64207594 |
| chr15 | 64203081 | 64216713 |
| chr15 | 64204440 | 64204949 |
| chr15 | 64213889 | 64216713 |
| chr15 | 64251511 | 64300723 |
| chr15 | 64406329 | 64409828 |
| chr15 | 64418540 | 64425631 |
| chr15 | 64741172 | 64751638 |
| chr15 | 64748418 | 64750381 |
| chr15 | 64748418 | 64751638 |
| chr15 | 64817945 | 64819223 |
| chr15 | 64818256 | 64819223 |
| chr15 | 64822265 | 64824354 |
| chr15 | 64926065 | 64931585 |
| chr15 | 64965319 | 64981025 |
| chr15 | 64969254 | 64974747 |
| chr15 | 64974601 | 64976555 |
| chr15 | 64974601 | 64981025 |
| chr15 | 64974601 | 64983593 |
| chr15 | 64976474 | 64983593 |
| chr15 | 64980863 | 64983593 |
| chr15 | 65016435 | 65021616 |
| chr15 | 65023671 | 65027040 |
| chr15 | 65058426 | 65059418 |
| chr15 | 65152429 | 65180204 |
| chr15 | 65153546 | 65155081 |
| chr15 | 65178933 | 65180204 |
| chr15 | 65260884 | 65271072 |
| chr15 | 65450998 | 65452102 |
| chr15 | 65450998 | 65456371 |
| chr15 | 65450998 | 65467223 |
| chr15 | 65454262 | 65456371 |
| chr15 | 65454262 | 65474288 |
| chr15 | 65463760 | 65474288 |

|       |          |          |
|-------|----------|----------|
| chr15 | 65463760 | 65480399 |
| chr15 | 65463760 | 65481615 |
| chr15 | 65463760 | 65490299 |
| chr15 | 65463760 | 65512564 |
| chr15 | 65466677 | 65467223 |
| chr15 | 65466677 | 65481615 |
| chr15 | 65474208 | 65480399 |
| chr15 | 65474208 | 65490299 |
| chr15 | 65478879 | 65480399 |
| chr15 | 65478879 | 65481615 |
| chr15 | 65480221 | 65481615 |
| chr15 | 65481514 | 65512564 |
| chr15 | 65485098 | 65487818 |
| chr15 | 65485098 | 65490299 |
| chr15 | 65487689 | 65500779 |
| chr15 | 65487689 | 65512564 |
| chr15 | 65490188 | 65500779 |
| chr15 | 65497863 | 65500779 |
| chr15 | 65500605 | 65507355 |
| chr15 | 65507242 | 65512564 |
| chr15 | 65512294 | 65515791 |
| chr15 | 65551675 | 65558731 |
| chr15 | 65551675 | 65564342 |
| chr15 | 65554886 | 65558731 |
| chr15 | 65554886 | 65564342 |
| chr15 | 65570090 | 65572366 |
| chr15 | 65591597 | 65593572 |
| chr15 | 65591597 | 65595825 |
| chr15 | 65598871 | 65607442 |
| chr15 | 65667448 | 65676634 |
| chr15 | 65669778 | 65670188 |
| chr15 | 65696365 | 65697383 |
| chr15 | 65702304 | 65706224 |
| chr15 | 65715477 | 65732818 |
| chr15 | 65715477 | 65756472 |
| chr15 | 65722847 | 65756472 |
| chr15 | 65729071 | 65732818 |
| chr15 | 65729071 | 65738875 |
| chr15 | 65729071 | 65741784 |
| chr15 | 65729071 | 65756472 |
| chr15 | 65737706 | 65738875 |
| chr15 | 65741714 | 65756472 |
| chr15 | 65752378 | 65756472 |
| chr15 | 65752378 | 65761438 |
| chr15 | 65756139 | 65761438 |

|       |          |          |
|-------|----------|----------|
| chr15 | 65877331 | 65877955 |
| chr15 | 66119085 | 66128411 |
| chr15 | 66294987 | 66314117 |
| chr15 | 66294987 | 66315215 |
| chr15 | 66306823 | 66308844 |
| chr15 | 66311723 | 66318618 |
| chr15 | 66318448 | 66320732 |
| chr15 | 66349059 | 66349437 |
| chr15 | 66349059 | 66351600 |
| chr15 | 66435026 | 66436892 |
| chr15 | 66435026 | 66444707 |
| chr15 | 66436745 | 66444707 |
| chr15 | 66481754 | 66485191 |
| chr15 | 66481754 | 66487292 |
| chr15 | 66508840 | 66537263 |
| chr15 | 66513987 | 66546705 |
| chr15 | 66518878 | 66521205 |
| chr15 | 66520589 | 66523748 |
| chr15 | 66528851 | 66533013 |
| chr15 | 66528851 | 66540210 |
| chr15 | 66532246 | 66537263 |
| chr15 | 66535932 | 66537263 |
| chr15 | 66535932 | 66540210 |
| chr15 | 67164894 | 67165384 |
| chr15 | 67164894 | 67166853 |
| chr15 | 67164894 | 67170604 |
| chr15 | 67231813 | 67236820 |
| chr15 | 67235978 | 67236820 |
| chr15 | 67550033 | 67586913 |
| chr15 | 67550033 | 67600749 |
| chr15 | 67580753 | 67600749 |
| chr15 | 67580753 | 67630927 |
| chr15 | 67580753 | 67664645 |
| chr15 | 67600684 | 67646469 |
| chr15 | 67600684 | 67664645 |
| chr15 | 67600684 | 67748601 |
| chr15 | 67600684 | 67772752 |
| chr15 | 67630887 | 67664645 |
| chr15 | 67646230 | 67664645 |
| chr15 | 67646230 | 67703408 |
| chr15 | 67658552 | 67703408 |
| chr15 | 67664596 | 67703408 |
| chr15 | 67664596 | 67748601 |
| chr15 | 67692478 | 67703408 |
| chr15 | 67692478 | 67727945 |

|       |          |          |
|-------|----------|----------|
| chr15 | 67703336 | 67772752 |
| chr15 | 67830190 | 67833257 |
| chr15 | 68141945 | 68146700 |
| chr15 | 68141945 | 68153695 |
| chr15 | 68141945 | 68164804 |
| chr15 | 68141945 | 68173892 |
| chr15 | 68145815 | 68164804 |
| chr15 | 68145815 | 68173892 |
| chr15 | 68153589 | 68183667 |
| chr15 | 68164730 | 68176654 |
| chr15 | 68173731 | 68176654 |
| chr15 | 68173731 | 68181354 |
| chr15 | 68173731 | 68183667 |
| chr15 | 68175636 | 68176654 |
| chr15 | 68209636 | 68218650 |
| chr15 | 68211262 | 68218650 |
| chr15 | 68214289 | 68218650 |
| chr15 | 69210315 | 69261329 |
| chr15 | 69417382 | 69422435 |
| chr15 | 69421646 | 69422435 |
| chr15 | 69421646 | 69423329 |
| chr15 | 69423158 | 69426457 |
| chr15 | 69426069 | 69438405 |
| chr15 | 69426335 | 69429213 |
| chr15 | 69426335 | 69436261 |
| chr15 | 69436137 | 69436722 |
| chr15 | 69440307 | 69441079 |
| chr15 | 70682757 | 70699660 |
| chr15 | 70687539 | 70699660 |
| chr15 | 70900921 | 70919193 |
| chr15 | 70900921 | 70936822 |
| chr15 | 70911531 | 70936822 |
| chr15 | 70911531 | 70980184 |
| chr15 | 71242648 | 71256715 |
| chr15 | 71411686 | 71660734 |
| chr15 | 71875790 | 71888116 |
| chr15 | 71878039 | 71893778 |
| chr15 | 71916369 | 71938927 |
| chr15 | 71978170 | 72010447 |
| chr15 | 71991102 | 71994585 |
| chr15 | 71991102 | 72007952 |
| chr15 | 71991102 | 72010447 |
| chr15 | 71991102 | 72027793 |
| chr15 | 71994468 | 72010447 |
| chr15 | 71999850 | 72010447 |

|       |          |          |
|-------|----------|----------|
| chr15 | 71999850 | 72027793 |
| chr15 | 72007825 | 72027793 |
| chr15 | 72007825 | 72032588 |
| chr15 | 72007825 | 72046634 |
| chr15 | 72019038 | 72046634 |
| chr15 | 72027730 | 72046634 |
| chr15 | 72032493 | 72046634 |
| chr15 | 72206727 | 72208891 |
| chr15 | 72217408 | 72219110 |
| chr15 | 72217408 | 72221284 |
| chr15 | 72257347 | 72259661 |
| chr15 | 72261557 | 72271287 |
| chr15 | 72350517 | 72356617 |
| chr15 | 72518066 | 72544964 |
| chr15 | 72518066 | 72555907 |
| chr15 | 72518066 | 72561549 |
| chr15 | 72518066 | 72572165 |
| chr15 | 72544819 | 72555907 |
| chr15 | 72544819 | 72572165 |
| chr15 | 72544819 | 72582187 |
| chr15 | 72555270 | 72572165 |
| chr15 | 72561482 | 72570307 |
| chr15 | 72561482 | 72572165 |
| chr15 | 72563393 | 72570307 |
| chr15 | 72563393 | 72572165 |
| chr15 | 72566562 | 72572165 |
| chr15 | 72570176 | 72572165 |
| chr15 | 72695176 | 72716850 |
| chr15 | 72695176 | 72724655 |
| chr15 | 72709699 | 72716850 |
| chr15 | 72731304 | 72735966 |
| chr15 | 72760406 | 72775097 |
| chr15 | 72771782 | 72775097 |
| chr15 | 73116539 | 73136027 |
| chr15 | 73122524 | 73136027 |
| chr15 | 73176402 | 73178427 |
| chr15 | 73570149 | 73573795 |
| chr15 | 73699585 | 73704472 |
| chr15 | 73702254 | 73703086 |
| chr15 | 73702771 | 73703997 |
| chr15 | 73708338 | 73711170 |
| chr15 | 74635408 | 74640619 |
| chr15 | 74635408 | 74675142 |
| chr15 | 74640465 | 74656068 |
| chr15 | 74655732 | 74675142 |

|       |          |          |
|-------|----------|----------|
| chr15 | 74671454 | 74675142 |
| chr15 | 74923647 | 74926887 |
| chr15 | 74923647 | 74929232 |
| chr15 | 74926765 | 74929232 |
| chr15 | 75043440 | 75048721 |
| chr15 | 75394679 | 75400156 |
| chr15 | 75400729 | 75401970 |
| chr15 | 75400729 | 75422823 |
| chr15 | 75407054 | 75413045 |
| chr15 | 75407054 | 75422823 |
| chr15 | 75409835 | 75413045 |
| chr15 | 75409835 | 75422823 |
| chr15 | 75411491 | 75413045 |
| chr15 | 75412762 | 75414311 |
| chr15 | 75412762 | 75422823 |
| chr15 | 75414204 | 75422823 |
| chr15 | 75422646 | 75430408 |
| chr15 | 75473688 | 75490301 |
| chr15 | 75479847 | 75527261 |
| chr15 | 75490207 | 75509027 |
| chr15 | 75490207 | 75527261 |
| chr15 | 75505674 | 75517364 |
| chr15 | 75505674 | 75527261 |
| chr15 | 75517258 | 75524298 |
| chr15 | 75517258 | 75527261 |
| chr15 | 75523120 | 75524298 |
| chr15 | 75523120 | 75527261 |
| chr15 | 75601137 | 75621056 |
| chr15 | 75609557 | 75609994 |
| chr15 | 75609557 | 75617552 |
| chr15 | 75609557 | 75621056 |
| chr15 | 75617407 | 75621056 |
| chr15 | 75854385 | 75873568 |
| chr15 | 75854385 | 75879188 |
| chr15 | 75854385 | 75883424 |
| chr15 | 75859877 | 75869010 |
| chr15 | 75859877 | 75873568 |
| chr15 | 75859877 | 75883424 |
| chr15 | 75873427 | 75876271 |
| chr15 | 75876186 | 75883424 |
| chr15 | 75883365 | 75897061 |
| chr15 | 75913202 | 75930049 |
| chr15 | 76225848 | 76286481 |
| chr15 | 76231332 | 76295737 |
| chr15 | 76274411 | 76286481 |

|       |          |          |
|-------|----------|----------|
| chr15 | 76274411 | 76292700 |
| chr15 | 76274411 | 76295737 |
| chr15 | 76283756 | 76287945 |
| chr15 | 76283756 | 76292700 |
| chr15 | 76283756 | 76295737 |
| chr15 | 76285636 | 76292700 |
| chr15 | 76287845 | 76292700 |
| chr15 | 76287845 | 76295737 |
| chr15 | 76292430 | 76295737 |
| chr15 | 76574157 | 76665789 |
| chr15 | 76621763 | 76665789 |
| chr15 | 76753807 | 76767088 |
| chr15 | 76753807 | 76775117 |
| chr15 | 76764960 | 76767088 |
| chr15 | 76766917 | 76795440 |
| chr15 | 76771741 | 76775117 |
| chr15 | 76795279 | 76862533 |
| chr15 | 76841733 | 76862533 |
| chr15 | 76841733 | 76883876 |
| chr15 | 76857808 | 76862533 |
| chr15 | 76857808 | 76883876 |
| chr15 | 77052384 | 77056255 |
| chr15 | 77252366 | 77285078 |
| chr15 | 77252366 | 77286504 |
| chr15 | 77284957 | 77286504 |
| chr15 | 77467094 | 77471814 |
| chr15 | 77477554 | 77479321 |
| chr15 | 77478294 | 77479321 |
| chr15 | 78001618 | 78017957 |
| chr15 | 78024155 | 78030170 |
| chr15 | 78044899 | 78054187 |
| chr15 | 78157547 | 78161768 |
| chr15 | 78157547 | 78163780 |
| chr15 | 78160091 | 78162367 |
| chr15 | 78289618 | 78295725 |
| chr15 | 78462921 | 78466489 |
| chr15 | 78462921 | 78473381 |
| chr15 | 78462921 | 78478397 |
| chr15 | 78462921 | 78497311 |
| chr15 | 78465250 | 78466489 |
| chr15 | 78470531 | 78471924 |
| chr15 | 78470531 | 78478397 |
| chr15 | 78471740 | 78478397 |
| chr15 | 78490421 | 78490761 |
| chr15 | 78542176 | 78546698 |

|       |          |          |
|-------|----------|----------|
| chr15 | 78544189 | 78545764 |
| chr15 | 78544189 | 78546698 |
| chr15 | 78544868 | 78545764 |
| chr15 | 78544868 | 78546698 |
| chr15 | 78580810 | 78588423 |
| chr15 | 78878212 | 78886227 |
| chr15 | 78886140 | 78887349 |
| chr15 | 78887268 | 78894230 |
| chr15 | 80075163 | 80122800 |
| chr15 | 80098415 | 80121820 |
| chr15 | 80098415 | 80122800 |
| chr15 | 80120327 | 80122800 |
| chr15 | 80978930 | 80982182 |
| chr15 | 82138657 | 82152423 |
| chr15 | 82214716 | 82230971 |
| chr15 | 82214716 | 82241403 |
| chr15 | 82219651 | 82229110 |
| chr15 | 82229033 | 82241403 |
| chr15 | 82241269 | 82252775 |
| chr15 | 82400659 | 82408367 |
| chr15 | 82538305 | 82540132 |
| chr15 | 82552479 | 82557986 |
| chr15 | 82852141 | 82854800 |
| chr15 | 83030135 | 83041925 |
| chr15 | 83030135 | 83056545 |
| chr15 | 83041727 | 83050178 |
| chr15 | 83151214 | 83158041 |
| chr15 | 83151214 | 83164075 |
| chr15 | 84538531 | 84546277 |
| chr15 | 84542144 | 84555070 |
| chr15 | 84647889 | 84653699 |
| chr15 | 84680712 | 84687774 |
| chr15 | 84680712 | 84691644 |
| chr15 | 84687624 | 84691644 |
| chr15 | 84797868 | 84799977 |
| chr15 | 85064369 | 85067204 |
| chr15 | 85064369 | 85083644 |
| chr15 | 85067013 | 85083644 |
| chr15 | 85075861 | 85098036 |
| chr15 | 85097947 | 85109130 |
| chr15 | 85097947 | 85117839 |
| chr15 | 85109052 | 85116119 |
| chr15 | 85113872 | 85115487 |
| chr15 | 85113872 | 85121014 |
| chr15 | 85123060 | 85126374 |



|       |          |          |
|-------|----------|----------|
| chr15 | 85655416 | 85669830 |
| chr15 | 85662387 | 85682212 |
| chr15 | 85664562 | 85669830 |
| chr15 | 85664562 | 85682212 |
| chr15 | 85664562 | 85693451 |
| chr15 | 85669721 | 85710645 |
| chr15 | 85710578 | 85719326 |
| chr15 | 85715787 | 85719326 |
| chr15 | 88527598 | 88536381 |
| chr15 | 89113724 | 89116521 |
| chr15 | 89247628 | 89260843 |
| chr15 | 89247628 | 89264607 |
| chr15 | 89268398 | 89274304 |
| chr15 | 89268398 | 89285218 |
| chr15 | 89273376 | 89285218 |
| chr15 | 89292941 | 89301442 |
| chr15 | 89299799 | 89303915 |
| chr15 | 89307475 | 89314707 |
| chr15 | 89323814 | 89333913 |
| chr15 | 89584285 | 89585942 |
| chr15 | 89600584 | 89616495 |
| chr15 | 89642202 | 89649941 |
| chr15 | 89790459 | 89793126 |
| chr15 | 89837614 | 89889140 |
| chr15 | 89877305 | 89889140 |
| chr15 | 89888520 | 89889140 |
| chr15 | 89908279 | 89910819 |
| chr15 | 90067109 | 90073262 |
| chr15 | 90217438 | 90219891 |
| chr15 | 90217438 | 90221765 |
| chr15 | 90230933 | 90231507 |
| chr15 | 90251553 | 90253367 |
| chr15 | 90426109 | 90429666 |
| chr15 | 90426109 | 90433795 |
| chr15 | 90426109 | 90441684 |
| chr15 | 90439331 | 90441684 |
| chr15 | 90439331 | 90443478 |
| chr15 | 90439331 | 90467592 |
| chr15 | 90441505 | 90443478 |
| chr15 | 90443393 | 90456315 |
| chr15 | 90466000 | 90466436 |
| chr15 | 90466000 | 90467592 |
| chr15 | 90486953 | 90492711 |
| chr15 | 90491332 | 90492711 |
| chr15 | 90492544 | 90494835 |

|       |          |          |
|-------|----------|----------|
| chr15 | 90540038 | 90604447 |
| chr15 | 90638445 | 90641199 |
| chr15 | 90747388 | 90754938 |
| chr15 | 90765295 | 90769586 |
| chr15 | 90766909 | 90769586 |
| chr15 | 90766909 | 90785081 |
| chr15 | 90769132 | 90769586 |
| chr15 | 90803520 | 90804359 |
| chr15 | 90947795 | 90948794 |
| chr15 | 90974135 | 90980389 |
| chr15 | 90976675 | 90981981 |
| chr15 | 90979157 | 90980389 |
| chr15 | 90979157 | 90981981 |
| chr15 | 90980241 | 90984140 |
| chr15 | 90999676 | 90999975 |
| chr15 | 91000489 | 91003131 |
| chr15 | 91000489 | 91014433 |
| chr15 | 92885514 | 92892072 |
| chr15 | 92924320 | 92927330 |
| chr15 | 92924320 | 92929091 |
| chr15 | 92927243 | 92939718 |
| chr15 | 92945820 | 92967513 |
| chr15 | 92946037 | 92967513 |
| chr15 | 92948951 | 92967513 |
| chr15 | 92953356 | 92956649 |
| chr15 | 92953356 | 92967513 |
| chr15 | 92967324 | 92974950 |
| chr15 | 92991475 | 92997095 |
| chr15 | 92996956 | 92998621 |
| chr15 | 93004616 | 93014909 |
| chr15 | 96269847 | 96290783 |
| chr15 | 96282831 | 96290783 |
| chr15 | 96285325 | 96290783 |
| chr15 | 98891324 | 98896905 |
| chr15 | 98891324 | 98899621 |
| chr15 | 99199918 | 99245510 |
| chr15 | 99218587 | 99221864 |
| chr15 | 99218587 | 99228732 |
| chr15 | 99276575 | 99287951 |
| chr15 | 99333922 | 99363265 |
| chr15 | 99598429 | 99633173 |
| chr15 | 99598429 | 99645764 |
| chr15 | 99645560 | 99675458 |
| chr15 | 99671322 | 99675458 |
| chr15 | 99671322 | 99690428 |

|       |          |          |
|-------|----------|----------|
| chr15 | 99993047 | 99997589 |
| chr16 | 100371   | 119255   |
| chr16 | 10969160 | 10982991 |
| chr16 | 10977224 | 10982991 |
| chr16 | 11020192 | 11024921 |
| chr16 | 11020192 | 11044072 |
| chr16 | 11020192 | 11051641 |
| chr16 | 11020192 | 11061022 |
| chr16 | 11020192 | 11126146 |
| chr16 | 11051512 | 11126146 |
| chr16 | 110524   | 130591   |
| chr16 | 11120614 | 11126146 |
| chr16 | 11553532 | 11556735 |
| chr16 | 11698124 | 11700564 |
| chr16 | 11698124 | 11721670 |
| chr16 | 11721576 | 11734079 |
| chr16 | 11721576 | 11736233 |
| chr16 | 11730644 | 11736233 |
| chr16 | 11733981 | 11736233 |
| chr16 | 11752668 | 11758539 |
| chr16 | 11763477 | 11765685 |
| chr16 | 11774235 | 11779363 |
| chr16 | 11774235 | 11782388 |
| chr16 | 11779165 | 11782388 |
| chr16 | 11841694 | 11847806 |
| chr16 | 11846500 | 11846843 |
| chr16 | 11846500 | 11847806 |
| chr16 | 11846500 | 11850418 |
| chr16 | 11875760 | 11887750 |
| chr16 | 11875760 | 11896785 |
| chr16 | 11883014 | 11887750 |
| chr16 | 11883014 | 11891139 |
| chr16 | 11883014 | 11898035 |
| chr16 | 11885180 | 11887750 |
| chr16 | 11886470 | 11887750 |
| chr16 | 11886470 | 11898035 |
| chr16 | 11894953 | 11896785 |
| chr16 | 11894953 | 11897881 |
| chr16 | 11894953 | 11898035 |
| chr16 | 11896557 | 11898035 |
| chr16 | 11999296 | 12027444 |
| chr16 | 11999296 | 12078915 |
| chr16 | 12027319 | 12052222 |
| chr16 | 12061527 | 12078915 |
| chr16 | 1314019  | 1320517  |

|       |          |          |
|-------|----------|----------|
| chr16 | 1315653  | 1320517  |
| chr16 | 13934191 | 13935743 |
| chr16 | 14079289 | 14140760 |
| chr16 | 14482637 | 14629674 |
| chr16 | 14552020 | 14555709 |
| chr16 | 14552020 | 14584791 |
| chr16 | 14552020 | 14586361 |
| chr16 | 14552020 | 14593378 |
| chr16 | 14552020 | 14604226 |
| chr16 | 14580873 | 14584791 |
| chr16 | 14580873 | 14604226 |
| chr16 | 14586317 | 14604226 |
| chr16 | 14586317 | 14617650 |
| chr16 | 14586317 | 14627336 |
| chr16 | 1459106  | 1465338  |
| chr16 | 14593300 | 14604226 |
| chr16 | 14593300 | 14610809 |
| chr16 | 14599903 | 14609123 |
| chr16 | 14599903 | 14617650 |
| chr16 | 14606483 | 14617650 |
| chr16 | 14606483 | 14627336 |
| chr16 | 14617589 | 14629674 |
| chr16 | 14644273 | 14648592 |
| chr16 | 14644273 | 14662065 |
| chr16 | 14661891 | 14665071 |
| chr16 | 14853466 | 14866691 |
| chr16 | 1494245  | 1503002  |
| chr16 | 14997752 | 15004333 |
| chr16 | 15004186 | 15030056 |
| chr16 | 15038573 | 15048099 |
| chr16 | 15065218 | 15074861 |
| chr16 | 15068168 | 15071251 |
| chr16 | 15068168 | 15073080 |
| chr16 | 15072949 | 15076650 |
| chr16 | 15072949 | 15092614 |
| chr16 | 15083512 | 15092614 |
| chr16 | 1557934  | 1571534  |
| chr16 | 1557934  | 1607297  |
| chr16 | 15581216 | 15583238 |
| chr16 | 15615829 | 15617535 |
| chr16 | 15620450 | 15623123 |
| chr16 | 15664735 | 15667439 |
| chr16 | 15677800 | 15687511 |
| chr16 | 15691143 | 15696860 |
| chr16 | 15694164 | 15696860 |

|       |          |          |
|-------|----------|----------|
| chr16 | 1580758  | 1607297  |
| chr16 | 1586129  | 1588024  |
| chr16 | 15873490 | 15884205 |
| chr16 | 15879803 | 15884205 |
| chr16 | 16007815 | 16016621 |
| chr16 | 16009775 | 16016621 |
| chr16 | 16014490 | 16016621 |
| chr16 | 16033108 | 16048303 |
| chr16 | 16033108 | 16052816 |
| chr16 | 16033108 | 16056295 |
| chr16 | 16033108 | 16068302 |
| chr16 | 16044449 | 16071729 |
| chr16 | 16044449 | 16102717 |
| chr16 | 16052723 | 16056295 |
| chr16 | 16052723 | 16071729 |
| chr16 | 16071641 | 16079478 |
| chr16 | 16076325 | 16086991 |
| chr16 | 16079351 | 16086991 |
| chr16 | 16086823 | 16090588 |
| chr16 | 16086823 | 16102717 |
| chr16 | 16106737 | 16115076 |
| chr16 | 16121974 | 16125911 |
| chr16 | 16124788 | 16125911 |
| chr16 | 1625972  | 1632365  |
| chr16 | 1625972  | 1637907  |
| chr16 | 1625972  | 1641187  |
| chr16 | 16277369 | 16278789 |
| chr16 | 1632211  | 1641187  |
| chr16 | 1729137  | 1729578  |
| chr16 | 1743334  | 1748720  |
| chr16 | 1747028  | 1748720  |
| chr16 | 1809753  | 1823037  |
| chr16 | 1816892  | 1820014  |
| chr16 | 1816892  | 1823037  |
| chr16 | 1822299  | 1823037  |
| chr16 | 18543616 | 18549627 |
| chr16 | 18591103 | 18592716 |
| chr16 | 18794598 | 18798834 |
| chr16 | 18797924 | 18798834 |
| chr16 | 18815174 | 18819654 |
| chr16 | 18819501 | 18828168 |
| chr16 | 18819501 | 18830369 |
| chr16 | 18828030 | 18834438 |
| chr16 | 18829285 | 18830115 |
| chr16 | 18834891 | 18845651 |

|       |          |          |
|-------|----------|----------|
| chr16 | 18836359 | 18845651 |
| chr16 | 18841564 | 18845651 |
| chr16 | 18841564 | 18850467 |
| chr16 | 18845428 | 18850467 |
| chr16 | 18849216 | 18850467 |
| chr16 | 18858169 | 18859703 |
| chr16 | 18870800 | 18885162 |
| chr16 | 18876123 | 18885666 |
| chr16 | 19037873 | 19040446 |
| chr16 | 19073920 | 19075860 |
| chr16 | 192926   | 199238   |
| chr16 | 19532415 | 19537587 |
| chr16 | 19710508 | 19715037 |
| chr16 | 19730429 | 19735450 |
| chr16 | 19733697 | 19735450 |
| chr16 | 199061   | 208188   |
| chr16 | 199061   | 220747   |
| chr16 | 199061   | 227336   |
| chr16 | 2048586  | 2050486  |
| chr16 | 2050399  | 2055519  |
| chr16 | 2054295  | 2058873  |
| chr16 | 2056195  | 2057178  |
| chr16 | 2056195  | 2058873  |
| chr16 | 2056643  | 2057178  |
| chr16 | 206003   | 208188   |
| chr16 | 2065518  | 2080377  |
| chr16 | 2070455  | 2074389  |
| chr16 | 2075798  | 2080377  |
| chr16 | 2079031  | 2081798  |
| chr16 | 20802795 | 20803670 |
| chr16 | 20813189 | 20816212 |
| chr16 | 20821761 | 20828537 |
| chr16 | 20825832 | 20833123 |
| chr16 | 20827057 | 20828537 |
| chr16 | 20911182 | 20915714 |
| chr16 | 21463702 | 21473249 |
| chr16 | 21612644 | 21625115 |
| chr16 | 2175300  | 2175953  |
| chr16 | 21962459 | 21971620 |
| chr16 | 21962459 | 21972122 |
| chr16 | 21962459 | 21976243 |
| chr16 | 21962459 | 21980700 |
| chr16 | 21968627 | 21976243 |
| chr16 | 21971524 | 21976243 |
| chr16 | 22248754 | 22251322 |

|       |          |          |
|-------|----------|----------|
| chr16 | 22313619 | 22315208 |
| chr16 | 22349278 | 22349849 |
| chr16 | 22429795 | 22435812 |
| chr16 | 22432725 | 22435812 |
| chr16 | 22481030 | 22482643 |
| chr16 | 2262277  | 2263287  |
| chr16 | 2262277  | 2264331  |
| chr16 | 23079945 | 23082557 |
| chr16 | 23102318 | 23108183 |
| chr16 | 2317282  | 2317764  |
| chr16 | 2317647  | 2319840  |
| chr16 | 2317647  | 2329854  |
| chr16 | 2328452  | 2329854  |
| chr16 | 23392379 | 23417121 |
| chr16 | 23392379 | 23418827 |
| chr16 | 23406075 | 23417121 |
| chr16 | 23413447 | 23417121 |
| chr16 | 23413447 | 23418827 |
| chr16 | 23413447 | 23445961 |
| chr16 | 23416966 | 23418827 |
| chr16 | 23442476 | 23445961 |
| chr16 | 23525243 | 23552304 |
| chr16 | 23529501 | 23529897 |
| chr16 | 23544513 | 23552304 |
| chr16 | 23559467 | 23562271 |
| chr16 | 23559467 | 23567069 |
| chr16 | 23562624 | 23567069 |
| chr16 | 23621361 | 23623130 |
| chr16 | 23629203 | 23630469 |
| chr16 | 23642954 | 23661281 |
| chr16 | 23642954 | 23665728 |
| chr16 | 2431129  | 2439826  |
| chr16 | 2439352  | 2439826  |
| chr16 | 2439352  | 2443800  |
| chr16 | 2439352  | 2445622  |
| chr16 | 2448854  | 2449915  |
| chr16 | 24553512 | 24559677 |
| chr16 | 24561611 | 24564865 |
| chr16 | 24750725 | 24777358 |
| chr16 | 24758338 | 24777358 |
| chr16 | 24776932 | 24797966 |
| chr16 | 24804176 | 24809481 |
| chr16 | 24935469 | 24949484 |
| chr16 | 24949403 | 24959979 |
| chr16 | 24952288 | 24970580 |

|       |          |          |
|-------|----------|----------|
| chr16 | 24959670 | 24970580 |
| chr16 | 24964196 | 24970580 |
| chr16 | 24964196 | 24979005 |
| chr16 | 24968350 | 24970580 |
| chr16 | 25161101 | 25170805 |
| chr16 | 25164597 | 25170805 |
| chr16 | 25164597 | 25175034 |
| chr16 | 25170713 | 25175034 |
| chr16 | 25252945 | 25255392 |
| chr16 | 2557702  | 2561522  |
| chr16 | 2557702  | 2566453  |
| chr16 | 2566355  | 2583585  |
| chr16 | 2566355  | 2586893  |
| chr16 | 2577424  | 2581703  |
| chr16 | 2577424  | 2583585  |
| chr16 | 2577424  | 2586893  |
| chr16 | 2581606  | 2586893  |
| chr16 | 27213584 | 27215008 |
| chr16 | 27233000 | 27235299 |
| chr16 | 27340185 | 27346618 |
| chr16 | 27346466 | 27352696 |
| chr16 | 27483043 | 27489178 |
| chr16 | 27489042 | 27492713 |
| chr16 | 27494762 | 27495492 |
| chr16 | 27528597 | 27545523 |
| chr16 | 27533290 | 27545523 |
| chr16 | 2756333  | 2757945  |
| chr16 | 2757471  | 2757945  |
| chr16 | 2757471  | 2758547  |
| chr16 | 2757471  | 2759402  |
| chr16 | 2757471  | 2760499  |
| chr16 | 27701588 | 27708920 |
| chr16 | 27703895 | 27708920 |
| chr16 | 27749583 | 27751924 |
| chr16 | 27754172 | 27761590 |
| chr16 | 28101457 | 28101945 |
| chr16 | 28101457 | 28107677 |
| chr16 | 28101457 | 28125848 |
| chr16 | 28111816 | 28125848 |
| chr16 | 28121669 | 28132403 |
| chr16 | 28125688 | 28132403 |
| chr16 | 28132333 | 28156527 |
| chr16 | 28146093 | 28156527 |
| chr16 | 28146093 | 28169909 |
| chr16 | 28152658 | 28156527 |



|       |          |          |
|-------|----------|----------|
| chr16 | 28152658 | 28169909 |
| chr16 | 28166507 | 28169909 |
| chr16 | 28166507 | 28181031 |
| chr16 | 28169749 | 28177332 |
| chr16 | 28169749 | 28181031 |
| chr16 | 28175897 | 28181031 |
| chr16 | 28486346 | 28488662 |
| chr16 | 28487455 | 28489386 |
| chr16 | 28488590 | 28489386 |
| chr16 | 28723163 | 28727245 |
| chr16 | 28829400 | 28831072 |
| chr16 | 28880914 | 28882589 |
| chr16 | 28897999 | 28898451 |
| chr16 | 289439   | 293718   |
| chr16 | 28955977 | 28956337 |
| chr16 | 28958716 | 28959100 |
| chr16 | 28979154 | 28983290 |
| chr16 | 293487   | 298251   |
| chr16 | 29385649 | 29394076 |
| chr16 | 29457631 | 29458015 |
| chr16 | 29553085 | 29554992 |
| chr16 | 29554415 | 29560215 |
| chr16 | 297055   | 298251   |
| chr16 | 29799627 | 29800048 |
| chr16 | 29799627 | 29802937 |
| chr16 | 29830514 | 29835798 |
| chr16 | 29833732 | 29834066 |
| chr16 | 29833732 | 29835798 |
| chr16 | 29835703 | 29836958 |
| chr16 | 29876755 | 29878425 |
| chr16 | 29879863 | 29888725 |
| chr16 | 29895258 | 29895860 |
| chr16 | 29910977 | 29912049 |
| chr16 | 30067233 | 30070029 |
| chr16 | 30200724 | 30201293 |
| chr16 | 30298376 | 30301358 |
| chr16 | 30364899 | 30365594 |
| chr16 | 304303   | 314683   |
| chr16 | 304303   | 347106   |
| chr16 | 30652913 | 30654339 |
| chr16 | 30664214 | 30666541 |
| chr16 | 30664214 | 30667622 |
| chr16 | 30707182 | 30723229 |
| chr16 | 30716065 | 30716479 |
| chr16 | 30720161 | 30721476 |

|       |          |          |
|-------|----------|----------|
| chr16 | 30728965 | 30729572 |
| chr16 | 30728965 | 30734008 |
| chr16 | 30733279 | 30734008 |
| chr16 | 30733279 | 30734615 |
| chr16 | 30764937 | 30765327 |
| chr16 | 30766162 | 30766558 |
| chr16 | 30927307 | 30942536 |
| chr16 | 30942115 | 30942536 |
| chr16 | 309972   | 314683   |
| chr16 | 309972   | 347106   |
| chr16 | 31111299 | 31112027 |
| chr16 | 31120185 | 31128139 |
| chr16 | 31182512 | 31184002 |
| chr16 | 31188324 | 31189794 |
| chr16 | 31189122 | 31190842 |
| chr16 | 31297513 | 31297954 |
| chr16 | 31461921 | 31465982 |
| chr16 | 31473681 | 31473977 |
| chr16 | 31722625 | 31723353 |
| chr16 | 31884497 | 31885256 |
| chr16 | 31884497 | 31890250 |
| chr16 | 3476221  | 3479600  |
| chr16 | 3504719  | 3508468  |
| chr16 | 3504719  | 3512478  |
| chr16 | 3504719  | 3523299  |
| chr16 | 3506330  | 3512478  |
| chr16 | 3656101  | 3656753  |
| chr16 | 3674338  | 3679790  |
| chr16 | 3675323  | 3689137  |
| chr16 | 3677497  | 3679790  |
| chr16 | 3679718  | 3689137  |
| chr16 | 3679718  | 3690985  |
| chr16 | 3738558  | 3740549  |
| chr16 | 3738558  | 3745354  |
| chr16 | 3739577  | 3745354  |
| chr16 | 3740398  | 3751806  |
| chr16 | 3749626  | 3770986  |
| chr16 | 375132   | 376812   |
| chr16 | 3767719  | 3770986  |
| chr16 | 3777612  | 3778817  |
| chr16 | 3791980  | 3793626  |
| chr16 | 3791980  | 3810779  |
| chr16 | 3810602  | 3851009  |
| chr16 | 3977481  | 3983440  |
| chr16 | 3979115  | 3983440  |

|       |          |          |
|-------|----------|----------|
| chr16 | 3988993  | 3993510  |
| chr16 | 3992145  | 3993510  |
| chr16 | 4261778  | 4262701  |
| chr16 | 4405490  | 4413404  |
| chr16 | 4441374  | 4443164  |
| chr16 | 4441374  | 4448848  |
| chr16 | 4448732  | 4450497  |
| chr16 | 4466152  | 4469465  |
| chr16 | 4650364  | 4652824  |
| chr16 | 4650364  | 4657363  |
| chr16 | 4651962  | 4657363  |
| chr16 | 4651962  | 4665151  |
| chr16 | 4657245  | 4668312  |
| chr16 | 46603974 | 46604461 |
| chr16 | 46608296 | 46618372 |
| chr16 | 46615945 | 46617749 |
| chr16 | 46615945 | 46618372 |
| chr16 | 46617633 | 46618372 |
| chr16 | 4664708  | 4673657  |
| chr16 | 46661717 | 46663162 |
| chr16 | 46661717 | 46674660 |
| chr16 | 46668929 | 46677398 |
| chr16 | 46674313 | 46677398 |
| chr16 | 46677314 | 46679156 |
| chr16 | 46680670 | 46683606 |
| chr16 | 4671390  | 4673657  |
| chr16 | 4677462  | 4683932  |
| chr16 | 4681549  | 4683932  |
| chr16 | 46897647 | 46900790 |
| chr16 | 46897647 | 46906975 |
| chr16 | 46906841 | 46916707 |
| chr16 | 46959002 | 46967646 |
| chr16 | 46964610 | 46967646 |
| chr16 | 4700969  | 4724831  |
| chr16 | 47086225 | 47132025 |
| chr16 | 47109482 | 47122912 |
| chr16 | 47109482 | 47129364 |
| chr16 | 47109482 | 47132025 |
| chr16 | 47122656 | 47132025 |
| chr16 | 47128324 | 47132025 |
| chr16 | 471294   | 489000   |
| chr16 | 47218867 | 47365869 |
| chr16 | 4724749  | 4727177  |
| chr16 | 47258631 | 47313823 |
| chr16 | 47311239 | 47313823 |

|       |          |          |
|-------|----------|----------|
| chr16 | 47311239 | 47365869 |
| chr16 | 47311239 | 47375940 |
| chr16 | 47428803 | 47459175 |
| chr16 | 47451395 | 47459175 |
| chr16 | 47463881 | 47503090 |
| chr16 | 47463881 | 47515601 |
| chr16 | 47463881 | 47547548 |
| chr16 | 47463881 | 47589102 |
| chr16 | 47463881 | 47610920 |
| chr16 | 47463881 | 47669417 |
| chr16 | 47497398 | 47503090 |
| chr16 | 47497398 | 47515601 |
| chr16 | 47497398 | 47547548 |
| chr16 | 47497398 | 47580358 |
| chr16 | 47497398 | 47594214 |
| chr16 | 47497398 | 47596531 |
| chr16 | 47497398 | 47610920 |
| chr16 | 47497398 | 47669417 |
| chr16 | 47580294 | 47589102 |
| chr16 | 47587667 | 47610920 |
| chr16 | 4760491  | 4766076  |
| chr16 | 47641034 | 47698588 |
| chr16 | 47660505 | 47669417 |
| chr16 | 4811169  | 4812248  |
| chr16 | 48252130 | 48258740 |
| chr16 | 48252130 | 48262872 |
| chr16 | 48252130 | 48270274 |
| chr16 | 48252130 | 48277479 |
| chr16 | 482524   | 489000   |
| chr16 | 482524   | 503097   |
| chr16 | 48256609 | 48262872 |
| chr16 | 48256609 | 48277479 |
| chr16 | 48256609 | 48303305 |
| chr16 | 48256609 | 48334358 |
| chr16 | 48258617 | 48262872 |
| chr16 | 48258617 | 48277479 |
| chr16 | 48277337 | 48303305 |
| chr16 | 48296014 | 48334358 |
| chr16 | 4831978  | 4832912  |
| chr16 | 48347506 | 48348290 |
| chr16 | 48546146 | 48553669 |
| chr16 | 48553538 | 48562444 |
| chr16 | 4857989  | 4861102  |
| chr16 | 4871154  | 4872934  |
| chr16 | 50068779 | 50079018 |

|       |          |          |
|-------|----------|----------|
| chr16 | 50068779 | 50086351 |
| chr16 | 50075570 | 50094793 |
| chr16 | 50078740 | 50086351 |
| chr16 | 50086214 | 50100373 |
| chr16 | 50086214 | 50102435 |
| chr16 | 50094704 | 50102435 |
| chr16 | 50211322 | 50217663 |
| chr16 | 50214220 | 50217663 |
| chr16 | 50216074 | 50225285 |
| chr16 | 5027134  | 5028185  |
| chr16 | 503003   | 519024   |
| chr16 | 50333573 | 50334895 |
| chr16 | 50333573 | 50340086 |
| chr16 | 50333573 | 50354922 |
| chr16 | 50350022 | 50354922 |
| chr16 | 50548716 | 50621708 |
| chr16 | 50749575 | 50754424 |
| chr16 | 50754318 | 50786946 |
| chr16 | 50786854 | 50793664 |
| chr16 | 5079747  | 5081056  |
| chr16 | 53222643 | 53227603 |
| chr16 | 53228982 | 53243016 |
| chr16 | 53228982 | 53250066 |
| chr16 | 53235184 | 53243016 |
| chr16 | 53235184 | 53247503 |
| chr16 | 53235184 | 53250066 |
| chr16 | 53235184 | 53254605 |
| chr16 | 53254437 | 53255779 |
| chr16 | 53254437 | 53268126 |
| chr16 | 53254437 | 53274302 |
| chr16 | 53255599 | 53268126 |
| chr16 | 53255599 | 53274302 |
| chr16 | 53255599 | 53293052 |
| chr16 | 53267293 | 53268126 |
| chr16 | 53273625 | 53274302 |
| chr16 | 53285595 | 53293052 |
| chr16 | 53285595 | 53307905 |
| chr16 | 53291724 | 53308854 |
| chr16 | 53303719 | 53306397 |
| chr16 | 53303719 | 53307953 |
| chr16 | 53307680 | 53308854 |
| chr16 | 53307680 | 53318340 |
| chr16 | 53314376 | 53315044 |
| chr16 | 533945   | 536142   |
| chr16 | 53439015 | 53447106 |

|       |          |          |
|-------|----------|----------|
| chr16 | 53439015 | 53451831 |
| chr16 | 53439015 | 53453769 |
| chr16 | 53442657 | 53447106 |
| chr16 | 53442657 | 53454842 |
| chr16 | 53454655 | 53470922 |
| chr16 | 53479153 | 53480769 |
| chr16 | 53498390 | 53500329 |
| chr16 | 53610966 | 53622356 |
| chr16 | 53619024 | 53622356 |
| chr16 | 53636438 | 53641116 |
| chr16 | 53636438 | 53649115 |
| chr16 | 53686432 | 53692364 |
| chr16 | 53810139 | 53826491 |
| chr16 | 53810139 | 53844298 |
| chr16 | 53810139 | 53888951 |
| chr16 | 53810139 | 53934109 |
| chr16 | 53825863 | 53844298 |
| chr16 | 53844154 | 53879987 |
| chr16 | 53844154 | 53888951 |
| chr16 | 53873785 | 53879987 |
| chr16 | 53873785 | 53888951 |
| chr16 | 53873785 | 53934109 |
| chr16 | 53879843 | 53888951 |
| chr16 | 53888831 | 53934109 |
| chr16 | 55525507 | 55551102 |
| chr16 | 55532823 | 55549402 |
| chr16 | 55534442 | 55551102 |
| chr16 | 55537577 | 55579244 |
| chr16 | 55545734 | 55551102 |
| chr16 | 56367443 | 56369327 |
| chr16 | 56385918 | 56389375 |
| chr16 | 56385918 | 56414344 |
| chr16 | 56389184 | 56405041 |
| chr16 | 56401732 | 56414344 |
| chr16 | 56407963 | 56409588 |
| chr16 | 56458547 | 56467293 |
| chr16 | 56466151 | 56475565 |
| chr16 | 56470002 | 56470791 |
| chr16 | 56501352 | 56506224 |
| chr16 | 56509956 | 56514680 |
| chr16 | 56748233 | 56758655 |
| chr16 | 56758537 | 56805632 |
| chr16 | 56818663 | 56823846 |
| chr16 | 56836600 | 56839604 |
| chr16 | 56837607 | 56839604 |

|       |          |          |
|-------|----------|----------|
| chr16 | 56837607 | 56841833 |
| chr16 | 56838951 | 56839604 |
| chr16 | 56935234 | 56936817 |
| chr16 | 56939236 | 56940245 |
| chr16 | 57110707 | 57137282 |
| chr16 | 57119194 | 57119650 |
| chr16 | 57123413 | 57127903 |
| chr16 | 57164000 | 57172874 |
| chr16 | 57164000 | 57173869 |
| chr16 | 57167092 | 57173869 |
| chr16 | 57172775 | 57173869 |
| chr16 | 57204503 | 57217035 |
| chr16 | 57204503 | 57231319 |
| chr16 | 57216903 | 57221415 |
| chr16 | 57216903 | 57227453 |
| chr16 | 57216903 | 57231319 |
| chr16 | 57216903 | 57235228 |
| chr16 | 57227341 | 57231319 |
| chr16 | 57246079 | 57249852 |
| chr16 | 574065   | 576254   |
| chr16 | 57451039 | 57452936 |
| chr16 | 57521067 | 57526127 |
| chr16 | 57762139 | 57764247 |
| chr16 | 58002478 | 58010112 |
| chr16 | 58009928 | 58017439 |
| chr16 | 58164053 | 58196844 |
| chr16 | 58174450 | 58186856 |
| chr16 | 58174450 | 58196844 |
| chr16 | 58186754 | 58196844 |
| chr16 | 58523369 | 58530347 |
| chr16 | 58525988 | 58530347 |
| chr16 | 58536988 | 58538914 |
| chr16 | 58543606 | 58546749 |
| chr16 | 58549718 | 58560362 |
| chr16 | 58555250 | 58560362 |
| chr16 | 58574608 | 58575129 |
| chr16 | 58574608 | 58576582 |
| chr16 | 58574608 | 58583182 |
| chr16 | 58574608 | 58599511 |
| chr16 | 58576462 | 58583182 |
| chr16 | 58578698 | 58585506 |
| chr16 | 58580632 | 58581515 |
| chr16 | 58580632 | 58583182 |
| chr16 | 58582792 | 58583182 |
| chr16 | 58585337 | 58588906 |

|       |          |          |
|-------|----------|----------|
| chr16 | 58585337 | 58599511 |
| chr16 | 58586544 | 58587413 |
| chr16 | 58586544 | 58599511 |
| chr16 | 58709416 | 58716813 |
| chr16 | 58716013 | 58716813 |
| chr16 | 58716013 | 58719255 |
| chr16 | 58716013 | 58723902 |
| chr16 | 58718195 | 58719255 |
| chr16 | 58722149 | 58723902 |
| chr16 | 625431   | 626121   |
| chr16 | 66517135 | 66531469 |
| chr16 | 66517135 | 66549009 |
| chr16 | 66517788 | 66549009 |
| chr16 | 66528993 | 66541953 |
| chr16 | 66528993 | 66549009 |
| chr16 | 66608308 | 66610003 |
| chr16 | 66622061 | 66636581 |
| chr16 | 66725827 | 66729099 |
| chr16 | 66727687 | 66729099 |
| chr16 | 66730111 | 66736244 |
| chr16 | 66732338 | 66749313 |
| chr16 | 66805776 | 66806026 |
| chr16 | 66805776 | 66810772 |
| chr16 | 66805776 | 66823600 |
| chr16 | 66805911 | 66809075 |
| chr16 | 66810373 | 66816672 |
| chr16 | 66813563 | 66823600 |
| chr16 | 66816580 | 66823600 |
| chr16 | 66938036 | 66939358 |
| chr16 | 66963178 | 66964727 |
| chr16 | 67036638 | 67066798 |
| chr16 | 67036638 | 67082308 |
| chr16 | 67036638 | 67082339 |
| chr16 | 67066681 | 67082308 |
| chr16 | 67066681 | 67082339 |
| chr16 | 67120111 | 67132525 |
| chr16 | 67139983 | 67140594 |
| chr16 | 671696   | 672384   |
| chr16 | 67229792 | 67238128 |
| chr16 | 67236556 | 67237382 |
| chr16 | 67438792 | 67443178 |
| chr16 | 67540578 | 67541578 |
| chr16 | 67571147 | 67612121 |
| chr16 | 67571147 | 67621591 |
| chr16 | 67571147 | 67626715 |



|       |          |          |
|-------|----------|----------|
| chr16 | 67610823 | 67612121 |
| chr16 | 67610823 | 67621591 |
| chr16 | 67610823 | 67628552 |
| chr16 | 67611950 | 67620817 |
| chr16 | 67620696 | 67629533 |
| chr16 | 67626554 | 67629533 |
| chr16 | 67628369 | 67629533 |
| chr16 | 67727326 | 67738035 |
| chr16 | 67727326 | 67744455 |
| chr16 | 67865101 | 67868599 |
| chr16 | 67947668 | 67950493 |
| chr16 | 68025414 | 68038149 |
| chr16 | 68025414 | 68049550 |
| chr16 | 68025414 | 68054617 |
| chr16 | 68025414 | 68056424 |
| chr16 | 68038005 | 68054617 |
| chr16 | 68038005 | 68056424 |
| chr16 | 68053563 | 68056424 |
| chr16 | 68056363 | 68066636 |
| chr16 | 68056363 | 68071108 |
| chr16 | 68121986 | 68126610 |
| chr16 | 68121986 | 68167015 |
| chr16 | 68121986 | 68174514 |
| chr16 | 68121986 | 68183366 |
| chr16 | 68121986 | 68191775 |
| chr16 | 68126447 | 68167015 |
| chr16 | 68157868 | 68167015 |
| chr16 | 68157868 | 68174514 |
| chr16 | 68157868 | 68183366 |
| chr16 | 68157868 | 68191775 |
| chr16 | 68166842 | 68183366 |
| chr16 | 68166842 | 68191775 |
| chr16 | 68174373 | 68183366 |
| chr16 | 68174373 | 68191775 |
| chr16 | 68181474 | 68183366 |
| chr16 | 68181474 | 68191775 |
| chr16 | 68190767 | 68214432 |
| chr16 | 68266592 | 68273904 |
| chr16 | 68266592 | 68275249 |
| chr16 | 68266592 | 68287871 |
| chr16 | 68274690 | 68287871 |
| chr16 | 68287745 | 68291661 |
| chr16 | 68321425 | 68329174 |
| chr16 | 68859883 | 68863061 |
| chr16 | 68859883 | 68867220 |

|       |          |          |
|-------|----------|----------|
| chr16 | 68859883 | 68880630 |
| chr16 | 68859883 | 68909402 |
| chr16 | 68867078 | 68878280 |
| chr16 | 68867078 | 68880630 |
| chr16 | 68875153 | 68880630 |
| chr16 | 68875153 | 68902504 |
| chr16 | 68907442 | 68909402 |
| chr16 | 69136695 | 69143389 |
| chr16 | 69136695 | 69150904 |
| chr16 | 69139824 | 69143389 |
| chr16 | 69139824 | 69154457 |
| chr16 | 69143177 | 69154457 |
| chr16 | 69150536 | 69150904 |
| chr16 | 69150536 | 69154457 |
| chr16 | 69155870 | 69163178 |
| chr16 | 69155870 | 69167185 |
| chr16 | 69160355 | 69167185 |
| chr16 | 69165340 | 69167185 |
| chr16 | 69245601 | 69260260 |
| chr16 | 69245601 | 69270285 |
| chr16 | 69245601 | 69284244 |
| chr16 | 69260049 | 69284244 |
| chr16 | 69361403 | 69367199 |
| chr16 | 69361403 | 69368482 |
| chr16 | 69366806 | 69368482 |
| chr16 | 69366806 | 69370629 |
| chr16 | 69366806 | 69372355 |
| chr16 | 69368375 | 69372355 |
| chr16 | 69370482 | 69372355 |
| chr16 | 69372268 | 69385486 |
| chr16 | 69384579 | 69385486 |
| chr16 | 69626402 | 69655799 |
| chr16 | 69626402 | 69695379 |
| chr16 | 69647027 | 69659899 |
| chr16 | 69653235 | 69655799 |
| chr16 | 69653235 | 69659899 |
| chr16 | 69669976 | 69677335 |
| chr16 | 69669976 | 69684970 |
| chr16 | 69718122 | 69718534 |
| chr16 | 69748231 | 69752371 |
| chr16 | 69776188 | 69799295 |
| chr16 | 69776188 | 69842120 |
| chr16 | 69786995 | 69799295 |
| chr16 | 69798681 | 69799295 |
| chr16 | 69871803 | 69888249 |

|       |          |          |
|-------|----------|----------|
| chr16 | 69908760 | 69917883 |
| chr16 | 69931801 | 69934129 |
| chr16 | 69982349 | 69982757 |
| chr16 | 69982349 | 69986509 |
| chr16 | 69982349 | 70014167 |
| chr16 | 70010750 | 70014167 |
| chr16 | 70010750 | 70018097 |
| chr16 | 70021823 | 70031968 |
| chr16 | 70036431 | 70043003 |
| chr16 | 70120460 | 70127393 |
| chr16 | 70120460 | 70130544 |
| chr16 | 70130422 | 70132300 |
| chr16 | 70130422 | 70136386 |
| chr16 | 70143509 | 70148553 |
| chr16 | 70144420 | 70153573 |
| chr16 | 70219911 | 70222480 |
| chr16 | 70255727 | 70261157 |
| chr16 | 70255727 | 70268379 |
| chr16 | 70258032 | 70259186 |
| chr16 | 70258979 | 70262524 |
| chr16 | 70258979 | 70268379 |
| chr16 | 70261043 | 70262524 |
| chr16 | 70261043 | 70268379 |
| chr16 | 70261043 | 70270340 |
| chr16 | 70261043 | 70271972 |
| chr16 | 70264957 | 70265662 |
| chr16 | 70267658 | 70268379 |
| chr16 | 70269617 | 70282784 |
| chr16 | 70276485 | 70277154 |
| chr16 | 70276485 | 70282784 |
| chr16 | 70314901 | 70316104 |
| chr16 | 70314901 | 70325688 |
| chr16 | 70366084 | 70366861 |
| chr16 | 70463168 | 70463774 |
| chr16 | 70463168 | 70465176 |
| chr16 | 70468848 | 70469323 |
| chr16 | 70508405 | 70519731 |
| chr16 | 70514334 | 70517740 |
| chr16 | 70526586 | 70529199 |
| chr16 | 70526586 | 70530917 |
| chr16 | 70526586 | 70532620 |
| chr16 | 70526586 | 70544533 |
| chr16 | 70526586 | 70548442 |
| chr16 | 70530744 | 70539207 |
| chr16 | 70532478 | 70539207 |

|       |          |          |
|-------|----------|----------|
| chr16 | 70532478 | 70541834 |
| chr16 | 70532478 | 70544533 |
| chr16 | 70532478 | 70570149 |
| chr16 | 70535307 | 70541834 |
| chr16 | 70538322 | 70544533 |
| chr16 | 70541668 | 70544533 |
| chr16 | 70541668 | 70548442 |
| chr16 | 70541668 | 70557029 |
| chr16 | 70548369 | 70555206 |
| chr16 | 70556178 | 70557029 |
| chr16 | 70556178 | 70561784 |
| chr16 | 70563875 | 70565524 |
| chr16 | 70565064 | 70567536 |
| chr16 | 70565064 | 70569141 |
| chr16 | 70567410 | 70568495 |
| chr16 | 70567410 | 70569141 |
| chr16 | 70567410 | 70570149 |
| chr16 | 70568282 | 70570149 |
| chr16 | 70731494 | 70744579 |
| chr16 | 70762539 | 70763025 |
| chr16 | 70772108 | 70786365 |
| chr16 | 71652789 | 71681905 |
| chr16 | 71655239 | 71656681 |
| chr16 | 71655239 | 71658815 |
| chr16 | 71656570 | 71664099 |
| chr16 | 71656570 | 71679535 |
| chr16 | 71658232 | 71679535 |
| chr16 | 71658232 | 71684601 |
| chr16 | 71658232 | 71714801 |
| chr16 | 71663898 | 71667333 |
| chr16 | 71663898 | 71676649 |
| chr16 | 71667177 | 71672322 |
| chr16 | 71669274 | 71676649 |
| chr16 | 71672261 | 71676649 |
| chr16 | 71676446 | 71679535 |
| chr16 | 71676446 | 71681905 |
| chr16 | 71676446 | 71690709 |
| chr16 | 71676446 | 71714801 |
| chr16 | 71678754 | 71681905 |
| chr16 | 71679388 | 71690709 |
| chr16 | 71681750 | 71684601 |
| chr16 | 71684475 | 71690709 |
| chr16 | 71684475 | 71714801 |
| chr16 | 71690518 | 71702731 |
| chr16 | 71690518 | 71714801 |

|       |          |          |
|-------|----------|----------|
| chr16 | 71702597 | 71714801 |
| chr16 | 71738941 | 71739341 |
| chr16 | 71738941 | 71745614 |
| chr16 | 71745143 | 71745614 |
| chr16 | 71745143 | 71746692 |
| chr16 | 71745472 | 71750332 |
| chr16 | 71746587 | 71750332 |
| chr16 | 71746587 | 71753887 |
| chr16 | 71756018 | 71764726 |
| chr16 | 71761511 | 71769699 |
| chr16 | 71765488 | 71774592 |
| chr16 | 71915625 | 71917134 |
| chr16 | 71915625 | 71922680 |
| chr16 | 71915625 | 71923380 |
| chr16 | 71916461 | 71921453 |
| chr16 | 71920738 | 71921453 |
| chr16 | 71920738 | 71923380 |
| chr16 | 72088986 | 72090786 |
| chr16 | 72096821 | 72098792 |
| chr16 | 72284571 | 72349206 |
| chr16 | 72284571 | 72368722 |
| chr16 | 72522552 | 72555326 |
| chr16 | 72522552 | 72570515 |
| chr16 | 72523331 | 72570515 |
| chr16 | 72811576 | 72812038 |
| chr16 | 72950468 | 72960194 |
| chr16 | 74300114 | 74302292 |
| chr16 | 74336593 | 74360891 |
| chr16 | 74338444 | 74338894 |
| chr16 | 74348866 | 74350738 |
| chr16 | 74353776 | 74360891 |
| chr16 | 74456648 | 74457994 |
| chr16 | 74456648 | 74459789 |
| chr16 | 74457873 | 74459789 |
| chr16 | 74459681 | 74463479 |
| chr16 | 74472348 | 74477533 |
| chr16 | 74474545 | 74477533 |
| chr16 | 74474545 | 74494831 |
| chr16 | 74480240 | 74483124 |
| chr16 | 74485795 | 74491215 |
| chr16 | 74485795 | 74493140 |
| chr16 | 74485795 | 74494831 |
| chr16 | 74491000 | 74493140 |
| chr16 | 74494759 | 74496644 |
| chr16 | 74496440 | 74508925 |

|       |          |          |
|-------|----------|----------|
| chr16 | 74503530 | 74508925 |
| chr16 | 74503530 | 74532153 |
| chr16 | 74626342 | 74632673 |
| chr16 | 74626342 | 74636577 |
| chr16 | 74626342 | 74637970 |
| chr16 | 74626342 | 74644735 |
| chr16 | 74632522 | 74636577 |
| chr16 | 74632522 | 74637970 |
| chr16 | 74636345 | 74637970 |
| chr16 | 74644361 | 74644735 |
| chr16 | 74644361 | 74652122 |
| chr16 | 74644361 | 74661451 |
| chr16 | 74649131 | 74652122 |
| chr16 | 74649131 | 74661451 |
| chr16 | 74651919 | 74661451 |
| chr16 | 74674959 | 74675764 |
| chr16 | 74682650 | 74691463 |
| chr16 | 74885652 | 74886396 |
| chr16 | 74885652 | 74909657 |
| chr16 | 74885652 | 74909917 |
| chr16 | 74892483 | 74904100 |
| chr16 | 74908907 | 74909917 |
| chr16 | 74915869 | 74916259 |
| chr16 | 74917928 | 74922103 |
| chr16 | 74923925 | 74942826 |
| chr16 | 74923925 | 74951543 |
| chr16 | 74938149 | 74942826 |
| chr16 | 74938149 | 74949798 |
| chr16 | 74938149 | 74951543 |
| chr16 | 74949717 | 74956610 |
| chr16 | 74951457 | 74956610 |
| chr16 | 75603084 | 75622464 |
| chr16 | 75608223 | 75608988 |
| chr16 | 75612242 | 75622464 |
| chr16 | 75620265 | 75620820 |
| chr16 | 75634172 | 75640349 |
| chr16 | 75640183 | 75641723 |
| chr16 | 79424    | 83256    |
| chr16 | 81011929 | 81014181 |
| chr16 | 81351582 | 81357002 |
| chr16 | 81351582 | 81365478 |
| chr16 | 81356784 | 81357931 |
| chr16 | 81607566 | 81664349 |
| chr16 | 81652202 | 81664349 |
| chr16 | 81670141 | 81678628 |

|       |          |          |
|-------|----------|----------|
| chr16 | 81699684 | 81705604 |
| chr16 | 81854443 | 81859163 |
| chr16 | 81891471 | 81895927 |
| chr16 | 83906986 | 83912367 |
| chr16 | 84099052 | 84102107 |
| chr16 | 84129547 | 84135605 |
| chr16 | 84733434 | 84745673 |
| chr16 | 84740308 | 84745673 |
| chr16 | 84758715 | 84768358 |
| chr16 | 84758715 | 84775225 |
| chr16 | 84764085 | 84768358 |
| chr16 | 84979188 | 84981994 |
| chr16 | 84990303 | 84996007 |
| chr16 | 87342876 | 87347250 |
| chr16 | 87415275 | 87418901 |
| chr16 | 87419782 | 87460131 |
| chr16 | 87726764 | 87762040 |
| chr16 | 87730551 | 87755292 |
| chr16 | 87748672 | 87756477 |
| chr16 | 87748672 | 87762040 |
| chr16 | 87836497 | 87851849 |
| chr16 | 879569   | 911079   |
| chr16 | 879569   | 954666   |
| chr16 | 87975047 | 87981127 |
| chr16 | 87975047 | 87984259 |
| chr16 | 87975047 | 88018667 |
| chr16 | 87981035 | 87984259 |
| chr16 | 87984059 | 88006265 |
| chr16 | 88004294 | 88006265 |
| chr16 | 88004294 | 88018667 |
| chr16 | 88004294 | 88027650 |
| chr16 | 88004294 | 88038011 |
| chr16 | 88006089 | 88038011 |
| chr16 | 8801798  | 8804843  |
| chr16 | 8801798  | 8806407  |
| chr16 | 88018427 | 88027650 |
| chr16 | 88018427 | 88038011 |
| chr16 | 88027482 | 88038011 |
| chr16 | 88027482 | 88065332 |
| chr16 | 88033108 | 88038011 |
| chr16 | 8804766  | 8813106  |
| chr16 | 8811078  | 8813106  |
| chr16 | 8811637  | 8813106  |
| chr16 | 88485938 | 88489153 |
| chr16 | 8858349  | 8859335  |

|       |          |          |
|-------|----------|----------|
| chr16 | 88598177 | 88598712 |
| chr16 | 88598177 | 88611536 |
| chr16 | 88599790 | 88611536 |
| chr16 | 88608933 | 88611536 |
| chr16 | 88622196 | 88624062 |
| chr16 | 88625201 | 88628119 |
| chr16 | 88627621 | 88628854 |
| chr16 | 88627919 | 88628854 |
| chr16 | 88698501 | 88701418 |
| chr16 | 88804761 | 88807203 |
| chr16 | 88831997 | 88836267 |
| chr16 | 88835212 | 88841971 |
| chr16 | 8903267  | 8904565  |
| chr16 | 8906425  | 8910827  |
| chr16 | 89098590 | 89101347 |
| chr16 | 89098590 | 89102759 |
| chr16 | 89098590 | 89114487 |
| chr16 | 89100661 | 89114487 |
| chr16 | 89100661 | 89133262 |
| chr16 | 89133135 | 89146049 |
| chr16 | 8919030  | 8921295  |
| chr16 | 8919030  | 8930397  |
| chr16 | 8920358  | 8930397  |
| chr16 | 89220996 | 89222183 |
| chr16 | 89288527 | 89317078 |
| chr16 | 8929368  | 8930397  |
| chr16 | 893006   | 954666   |
| chr16 | 89305205 | 89313589 |
| chr16 | 89305205 | 89317075 |
| chr16 | 89305205 | 89317078 |
| chr16 | 89418283 | 89431326 |
| chr16 | 89510489 | 89513037 |
| chr16 | 89510489 | 89532636 |
| chr16 | 89524005 | 89526468 |
| chr16 | 89524005 | 89532636 |
| chr16 | 89531903 | 89532636 |
| chr16 | 89544647 | 89548113 |
| chr16 | 89544647 | 89550609 |
| chr16 | 89560939 | 89561368 |
| chr16 | 89589896 | 89591260 |
| chr16 | 89689251 | 89692516 |
| chr16 | 89733481 | 89737905 |
| chr16 | 89739993 | 89742938 |
| chr16 | 89744958 | 89748767 |
| chr16 | 89748658 | 89762022 |



|       |          |          |
|-------|----------|----------|
| chr16 | 89752137 | 89762022 |
| chr16 | 89758576 | 89762022 |
| chr16 | 89758576 | 89767237 |
| chr16 | 89761948 | 89792547 |
| chr16 | 89769836 | 89770259 |
| chr16 | 89791402 | 89792547 |
| chr16 | 89791402 | 89803341 |
| chr16 | 89795905 | 89805392 |
| chr16 | 89883350 | 89885966 |
| chr16 | 89892192 | 89896083 |
| chr16 | 89892192 | 89900794 |
| chr16 | 89895037 | 89900794 |
| chr16 | 89895037 | 89907322 |
| chr16 | 89895989 | 89900794 |
| chr16 | 89978809 | 89981923 |
| chr16 | 89988851 | 89992828 |
| chr16 | 90027635 | 90040509 |
| chr16 | 910930   | 954666   |
| chr16 | 98144    | 100509   |
| chr17 | 1050049  | 1070090  |
| chr17 | 1050049  | 1091850  |
| chr17 | 1050049  | 1100735  |
| chr17 | 1067076  | 1070090  |
| chr17 | 1067076  | 1083627  |
| chr17 | 1067076  | 1091850  |
| chr17 | 1069968  | 1083627  |
| chr17 | 1072613  | 1100735  |
| chr17 | 1079329  | 1100735  |
| chr17 | 1083519  | 1091850  |
| chr17 | 1083519  | 1100735  |
| chr17 | 1091664  | 1100735  |
| chr17 | 11990461 | 11992911 |
| chr17 | 12054888 | 12081530 |
| chr17 | 12054888 | 12095694 |
| chr17 | 12054888 | 12113360 |
| chr17 | 12054888 | 12129287 |
| chr17 | 12081355 | 12095694 |
| chr17 | 12081355 | 12113360 |
| chr17 | 12095574 | 12113360 |
| chr17 | 12908896 | 12919831 |
| chr17 | 12908896 | 12929046 |
| chr17 | 12908896 | 12952581 |
| chr17 | 12943587 | 12944196 |
| chr17 | 12949139 | 12952581 |
| chr17 | 13000155 | 13002579 |

|       |          |          |
|-------|----------|----------|
| chr17 | 13010612 | 13013275 |
| chr17 | 13010612 | 13017121 |
| chr17 | 1354210  | 1362008  |
| chr17 | 1354210  | 1365058  |
| chr17 | 1354210  | 1369741  |
| chr17 | 1361091  | 1362008  |
| chr17 | 1361091  | 1365058  |
| chr17 | 1361091  | 1369741  |
| chr17 | 1364858  | 1369741  |
| chr17 | 14074322 | 14077056 |
| chr17 | 1467241  | 1475032  |
| chr17 | 1470174  | 1478735  |
| chr17 | 1479430  | 1479705  |
| chr17 | 1480526  | 1480885  |
| chr17 | 1521578  | 1558559  |
| chr17 | 15327991 | 15331614 |
| chr17 | 1534098  | 1538952  |
| chr17 | 1534098  | 1541640  |
| chr17 | 1534098  | 1553149  |
| chr17 | 1534098  | 1558559  |
| chr17 | 1538868  | 1553149  |
| chr17 | 1548295  | 1553149  |
| chr17 | 1548295  | 1558559  |
| chr17 | 15545784 | 15547148 |
| chr17 | 15545784 | 15553829 |
| chr17 | 15545784 | 15555364 |
| chr17 | 15605222 | 15615809 |
| chr17 | 15612700 | 15615809 |
| chr17 | 15677175 | 15680953 |
| chr17 | 16001914 | 16006568 |
| chr17 | 16034764 | 16039654 |
| chr17 | 16034764 | 16040494 |
| chr17 | 16034764 | 16048988 |
| chr17 | 16057513 | 16058599 |
| chr17 | 16057906 | 16058599 |
| chr17 | 16061400 | 16064187 |
| chr17 | 16071408 | 16073569 |
| chr17 | 16079963 | 16101805 |
| chr17 | 16098366 | 16101805 |
| chr17 | 16098366 | 16118027 |
| chr17 | 16137310 | 16139186 |
| chr17 | 16137310 | 16146548 |
| chr17 | 16139007 | 16143696 |
| chr17 | 16143605 | 16171995 |
| chr17 | 16149450 | 16171995 |

|       |          |          |
|-------|----------|----------|
| chr17 | 16158759 | 16165161 |
| chr17 | 16158759 | 16171995 |
| chr17 | 16164978 | 16171995 |
| chr17 | 16186553 | 16194639 |
| chr17 | 1655349  | 1656761  |
| chr17 | 1675151  | 1676711  |
| chr17 | 1676975  | 1681054  |
| chr17 | 1678517  | 1681054  |
| chr17 | 1679290  | 1679799  |
| chr17 | 17171717 | 17180088 |
| chr17 | 17177249 | 17180088 |
| chr17 | 17214984 | 17217182 |
| chr17 | 17214984 | 17219209 |
| chr17 | 17254858 | 17260474 |
| chr17 | 17254858 | 17264981 |
| chr17 | 17261965 | 17264981 |
| chr17 | 17866295 | 17869473 |
| chr17 | 1786809  | 1787604  |
| chr17 | 17869339 | 17907531 |
| chr17 | 17879626 | 17893810 |
| chr17 | 17879626 | 17907531 |
| chr17 | 17884633 | 17893810 |
| chr17 | 1799856  | 1804715  |
| chr17 | 18021122 | 18028659 |
| chr17 | 18024623 | 18028659 |
| chr17 | 18229940 | 18238214 |
| chr17 | 18282697 | 18291027 |
| chr17 | 18285141 | 18285520 |
| chr17 | 18285141 | 18291027 |
| chr17 | 18285141 | 18294785 |
| chr17 | 18290556 | 18291027 |
| chr17 | 18290556 | 18302723 |
| chr17 | 18292644 | 18294785 |
| chr17 | 18292644 | 18299633 |
| chr17 | 18292644 | 18302434 |
| chr17 | 18292644 | 18306966 |
| chr17 | 18294702 | 18306966 |
| chr17 | 18299558 | 18306966 |
| chr17 | 18305111 | 18306966 |
| chr17 | 18306890 | 18308941 |
| chr17 | 18329277 | 18353817 |
| chr17 | 18330554 | 18340813 |
| chr17 | 18330554 | 18348440 |
| chr17 | 18330554 | 18353817 |
| chr17 | 18340042 | 18340813 |

|       |          |          |
|-------|----------|----------|
| chr17 | 18340042 | 18348440 |
| chr17 | 18340042 | 18353817 |
| chr17 | 18347495 | 18348440 |
| chr17 | 18347495 | 18353817 |
| chr17 | 18348324 | 18353817 |
| chr17 | 1842802  | 1844686  |
| chr17 | 1842802  | 1853189  |
| chr17 | 1842802  | 1872526  |
| chr17 | 1842802  | 1875793  |
| chr17 | 1842802  | 1877314  |
| chr17 | 1842802  | 1895095  |
| chr17 | 18514588 | 18517473 |
| chr17 | 1875660  | 1877314  |
| chr17 | 1875660  | 1883944  |
| chr17 | 18789352 | 18798943 |
| chr17 | 18797578 | 18804266 |
| chr17 | 18865468 | 18865952 |
| chr17 | 18865468 | 18867334 |
| chr17 | 18865468 | 18872649 |
| chr17 | 18865468 | 18882683 |
| chr17 | 18865468 | 18889877 |
| chr17 | 18865468 | 18911251 |
| chr17 | 18865468 | 18923984 |
| chr17 | 18867281 | 18877870 |
| chr17 | 18872582 | 18877870 |
| chr17 | 18882567 | 18911251 |
| chr17 | 18911102 | 18928957 |
| chr17 | 18923913 | 18928957 |
| chr17 | 19281954 | 19283714 |
| chr17 | 19309884 | 19329647 |
| chr17 | 19542392 | 19548133 |
| chr17 | 19542392 | 19549677 |
| chr17 | 19542392 | 19551468 |
| chr17 | 19546434 | 19549677 |
| chr17 | 19547984 | 19560493 |
| chr17 | 19555211 | 19560296 |
| chr17 | 19560187 | 19560493 |
| chr17 | 19560187 | 19567228 |
| chr17 | 19651546 | 19657862 |
| chr17 | 19651546 | 19671956 |
| chr17 | 19671720 | 19673275 |
| chr17 | 19795621 | 19804830 |
| chr17 | 19816748 | 19846910 |
| chr17 | 19841488 | 19865828 |
| chr17 | 19909180 | 19924517 |

|       |          |          |
|-------|----------|----------|
| chr17 | 19909180 | 19963022 |
| chr17 | 19920035 | 19936430 |
| chr17 | 19920035 | 19939849 |
| chr17 | 19924407 | 19931978 |
| chr17 | 19931804 | 19963022 |
| chr17 | 19936285 | 19958571 |
| chr17 | 19939712 | 19947505 |
| chr17 | 19939712 | 19958571 |
| chr17 | 20227412 | 20232405 |
| chr17 | 20227412 | 20232414 |
| chr17 | 20227412 | 20247319 |
| chr17 | 20227412 | 20306082 |
| chr17 | 20231757 | 20232405 |
| chr17 | 20231757 | 20232414 |
| chr17 | 20245925 | 20260294 |
| chr17 | 20245925 | 20306082 |
| chr17 | 2040504  | 2041181  |
| chr17 | 21004201 | 21004990 |
| chr17 | 21006895 | 21021226 |
| chr17 | 21006895 | 21028674 |
| chr17 | 21017941 | 21021226 |
| chr17 | 21017941 | 21028674 |
| chr17 | 21300544 | 21302259 |
| chr17 | 2172657  | 2188515  |
| chr17 | 2186662  | 2188515  |
| chr17 | 2282646  | 2283735  |
| chr17 | 2292551  | 2292977  |
| chr17 | 2315556  | 2323345  |
| chr17 | 2375491  | 2377953  |
| chr17 | 2394042  | 2395454  |
| chr17 | 2438108  | 2467876  |
| chr17 | 2438108  | 2473664  |
| chr17 | 2464207  | 2473664  |
| chr17 | 2464207  | 2477885  |
| chr17 | 2464207  | 2502331  |
| chr17 | 2638098  | 2672757  |
| chr17 | 2665371  | 2667198  |
| chr17 | 2665371  | 2670331  |
| chr17 | 2665371  | 2680320  |
| chr17 | 2666015  | 2672757  |
| chr17 | 2691608  | 2692097  |
| chr17 | 2691760  | 2704564  |
| chr17 | 27301787 | 27304911 |
| chr17 | 27301787 | 27309272 |
| chr17 | 27303366 | 27309272 |

|       |          |          |
|-------|----------|----------|
| chr17 | 27303366 | 27310174 |
| chr17 | 27303366 | 27311616 |
| chr17 | 27304779 | 27309272 |
| chr17 | 27304779 | 27311616 |
| chr17 | 28122602 | 28172618 |
| chr17 | 28163542 | 28172618 |
| chr17 | 28163542 | 28185265 |
| chr17 | 281767   | 321415   |
| chr17 | 281767   | 327579   |
| chr17 | 28349082 | 28355876 |
| chr17 | 28350437 | 28351800 |
| chr17 | 28351663 | 28353791 |
| chr17 | 28352911 | 28355876 |
| chr17 | 28358915 | 28360847 |
| chr17 | 28558475 | 28561629 |
| chr17 | 28591697 | 28593066 |
| chr17 | 28618790 | 28624390 |
| chr17 | 28642868 | 28644187 |
| chr17 | 28678544 | 28678963 |
| chr17 | 28682726 | 28683816 |
| chr17 | 28688090 | 28690229 |
| chr17 | 28689353 | 28690229 |
| chr17 | 28748016 | 28748666 |
| chr17 | 28917284 | 28919275 |
| chr17 | 28917284 | 28921808 |
| chr17 | 28917284 | 28927063 |
| chr17 | 28921687 | 28924302 |
| chr17 | 28921687 | 28927063 |
| chr17 | 29103598 | 29107189 |
| chr17 | 29103598 | 29114097 |
| chr17 | 29267497 | 29287716 |
| chr17 | 29451454 | 29467216 |
| chr17 | 29451454 | 29475771 |
| chr17 | 29451454 | 29482288 |
| chr17 | 29451454 | 29502723 |
| chr17 | 29451454 | 29510992 |
| chr17 | 29451454 | 29530619 |
| chr17 | 29451454 | 29534300 |
| chr17 | 29467144 | 29491865 |
| chr17 | 29475669 | 29482288 |
| chr17 | 29475669 | 29489757 |
| chr17 | 29475669 | 29517656 |
| chr17 | 29480367 | 29491865 |
| chr17 | 29482196 | 29491865 |
| chr17 | 29482196 | 29498521 |

|       |          |          |
|-------|----------|----------|
| chr17 | 29489663 | 29491865 |
| chr17 | 29507895 | 29510992 |
| chr17 | 29510863 | 29522519 |
| chr17 | 29517452 | 29522519 |
| chr17 | 29522279 | 29534300 |
| chr17 | 29530406 | 29534300 |
| chr17 | 29571590 | 29572057 |
| chr17 | 29581337 | 29582144 |
| chr17 | 2962669  | 2964068  |
| chr17 | 29648143 | 29650800 |
| chr17 | 29648143 | 29655607 |
| chr17 | 29648143 | 29672129 |
| chr17 | 29655560 | 29672129 |
| chr17 | 29666866 | 29684684 |
| chr17 | 29666866 | 29703062 |
| chr17 | 29671934 | 29677741 |
| chr17 | 29676819 | 29684684 |
| chr17 | 29676819 | 29703062 |
| chr17 | 29684562 | 29695523 |
| chr17 | 29684562 | 29703062 |
| chr17 | 2991296  | 3008145  |
| chr17 | 2991296  | 3020595  |
| chr17 | 2995336  | 3008145  |
| chr17 | 3005368  | 3008145  |
| chr17 | 3020476  | 3027070  |
| chr17 | 3026007  | 3027070  |
| chr17 | 30266884 | 30286902 |
| chr17 | 30272560 | 30289482 |
| chr17 | 30384988 | 30431881 |
| chr17 | 30443801 | 30451846 |
| chr17 | 30445690 | 30456351 |
| chr17 | 30451710 | 30456526 |
| chr17 | 30456461 | 30461311 |
| chr17 | 30481142 | 30484770 |
| chr17 | 30481142 | 30490217 |
| chr17 | 30481142 | 30492753 |
| chr17 | 30481142 | 30510909 |
| chr17 | 30484213 | 30492753 |
| chr17 | 30607551 | 30610942 |
| chr17 | 30785918 | 30792572 |
| chr17 | 30785918 | 30796337 |
| chr17 | 30785918 | 30804108 |
| chr17 | 30792439 | 30793672 |
| chr17 | 30792439 | 30804108 |
| chr17 | 30797310 | 30804108 |

|       |          |          |
|-------|----------|----------|
| chr17 | 30843912 | 30844916 |
| chr17 | 30843912 | 30860612 |
| chr17 | 30855142 | 30860612 |
| chr17 | 30858160 | 30865800 |
| chr17 | 30858160 | 30869646 |
| chr17 | 30860432 | 30869646 |
| chr17 | 30865703 | 30869646 |
| chr17 | 30868332 | 30879487 |
| chr17 | 30984616 | 30988106 |
| chr17 | 31155982 | 31163376 |
| chr17 | 31155982 | 31169997 |
| chr17 | 31155982 | 31181785 |
| chr17 | 31155982 | 31182665 |
| chr17 | 31155982 | 31206371 |
| chr17 | 31155982 | 31219118 |
| chr17 | 31163185 | 31182665 |
| chr17 | 31169890 | 31182665 |
| chr17 | 31169890 | 31206371 |
| chr17 | 31169890 | 31219118 |
| chr17 | 31200421 | 31206371 |
| chr17 | 31200421 | 31214585 |
| chr17 | 31200421 | 31227606 |
| chr17 | 31223443 | 31227606 |
| chr17 | 31248983 | 31260515 |
| chr17 | 31248983 | 31265339 |
| chr17 | 31252937 | 31259129 |
| chr17 | 31252937 | 31265339 |
| chr17 | 31252937 | 31326252 |
| chr17 | 31258343 | 31260515 |
| chr17 | 31258343 | 31265339 |
| chr17 | 31260368 | 31265339 |
| chr17 | 31349119 | 31360703 |
| chr17 | 31352256 | 31360703 |
| chr17 | 31358968 | 31360703 |
| chr17 | 31865365 | 31875413 |
| chr17 | 31865365 | 31878327 |
| chr17 | 31865365 | 31878781 |
| chr17 | 31878249 | 31899730 |
| chr17 | 31884423 | 31887313 |
| chr17 | 31884423 | 31892794 |
| chr17 | 31940285 | 31966196 |
| chr17 | 31940285 | 31973231 |
| chr17 | 31940285 | 31976614 |
| chr17 | 31940285 | 31988497 |
| chr17 | 31940421 | 31976614 |



|       |          |          |
|-------|----------|----------|
| chr17 | 319419   | 321415   |
| chr17 | 319419   | 327579   |
| chr17 | 31947616 | 31976614 |
| chr17 | 31966146 | 31976614 |
| chr17 | 31966146 | 31988497 |
| chr17 | 31973145 | 31988497 |
| chr17 | 31975481 | 31988497 |
| chr17 | 31982998 | 31988497 |
| chr17 | 31982998 | 31994721 |
| chr17 | 31993241 | 31995762 |
| chr17 | 31993864 | 31994721 |
| chr17 | 31993864 | 31995762 |
| chr17 | 31993864 | 31996877 |
| chr17 | 32027768 | 32031458 |
| chr17 | 32171042 | 32176213 |
| chr17 | 32171042 | 32194107 |
| chr17 | 32173830 | 32183272 |
| chr17 | 32173830 | 32192299 |
| chr17 | 32173830 | 32194107 |
| chr17 | 32173830 | 32201056 |
| chr17 | 32182756 | 32194107 |
| chr17 | 32193135 | 32199550 |
| chr17 | 32200955 | 32202900 |
| chr17 | 32333416 | 32335442 |
| chr17 | 32360597 | 32362984 |
| chr17 | 32365329 | 32368014 |
| chr17 | 32446944 | 32464578 |
| chr17 | 34983001 | 34986131 |
| chr17 | 35014739 | 35017606 |
| chr17 | 35016369 | 35017606 |
| chr17 | 35103253 | 35106481 |
| chr17 | 35103253 | 35107447 |
| chr17 | 35137000 | 35137890 |
| chr17 | 35139234 | 35140066 |
| chr17 | 35258650 | 35261096 |
| chr17 | 35360242 | 35363826 |
| chr17 | 35594007 | 35608387 |
| chr17 | 35598229 | 35608387 |
| chr17 | 35605704 | 35608387 |
| chr17 | 35624396 | 35627726 |
| chr17 | 35624396 | 35650789 |
| chr17 | 35627384 | 35627726 |
| chr17 | 35650529 | 35717349 |
| chr17 | 35657598 | 35682824 |
| chr17 | 35671753 | 35674321 |

|       |          |          |
|-------|----------|----------|
| chr17 | 35671753 | 35717349 |
| chr17 | 3580456  | 3591116  |
| chr17 | 35817715 | 35822833 |
| chr17 | 35817715 | 35824198 |
| chr17 | 35820023 | 35820437 |
| chr17 | 35820023 | 35822833 |
| chr17 | 35820331 | 35822833 |
| chr17 | 35834565 | 35838553 |
| chr17 | 35834565 | 35845038 |
| chr17 | 35836131 | 35838553 |
| chr17 | 3585767  | 3588367  |
| chr17 | 35920186 | 35930255 |
| chr17 | 35922576 | 35930255 |
| chr17 | 3621236  | 3624231  |
| chr17 | 36503096 | 36505404 |
| chr17 | 36509061 | 36511455 |
| chr17 | 36513428 | 36515990 |
| chr17 | 36513628 | 36515990 |
| chr17 | 36525227 | 36527699 |
| chr17 | 36525227 | 36528202 |
| chr17 | 36525227 | 36534104 |
| chr17 | 36554819 | 36557336 |
| chr17 | 36554819 | 36567776 |
| chr17 | 36557082 | 36560871 |
| chr17 | 36577982 | 36587245 |
| chr17 | 36585299 | 36586198 |
| chr17 | 36585299 | 36587245 |
| chr17 | 3664194  | 3664798  |
| chr17 | 36952885 | 36953907 |
| chr17 | 36986616 | 37021014 |
| chr17 | 36986616 | 37031685 |
| chr17 | 36988518 | 36990857 |
| chr17 | 37019004 | 37031685 |
| chr17 | 37111530 | 37113265 |
| chr17 | 37111530 | 37151421 |
| chr17 | 37129364 | 37155780 |
| chr17 | 37149863 | 37155780 |
| chr17 | 37149863 | 37181356 |
| chr17 | 37149863 | 37193415 |
| chr17 | 37149863 | 37210490 |
| chr17 | 37151300 | 37155780 |
| chr17 | 37179259 | 37181356 |
| chr17 | 37179259 | 37193415 |
| chr17 | 37179259 | 37207800 |
| chr17 | 37221723 | 37226452 |

|       |          |          |
|-------|----------|----------|
| chr17 | 37221723 | 37289528 |
| chr17 | 37243370 | 37246976 |
| chr17 | 37244587 | 37246976 |
| chr17 | 37246825 | 37253036 |
| chr17 | 37248010 | 37253036 |
| chr17 | 37270750 | 37289528 |
| chr17 | 37275950 | 37283405 |
| chr17 | 37283266 | 37284970 |
| chr17 | 37283266 | 37289528 |
| chr17 | 37284837 | 37289528 |
| chr17 | 37330172 | 37339850 |
| chr17 | 37411268 | 37465541 |
| chr17 | 37426949 | 37440662 |
| chr17 | 37437737 | 37442652 |
| chr17 | 37437737 | 37444768 |
| chr17 | 37440504 | 37442652 |
| chr17 | 37440504 | 37444768 |
| chr17 | 37440504 | 37462121 |
| chr17 | 37440504 | 37465541 |
| chr17 | 37442563 | 37462121 |
| chr17 | 37458523 | 37465541 |
| chr17 | 37535978 | 37538420 |
| chr17 | 37535978 | 37539245 |
| chr17 | 37538323 | 37540543 |
| chr17 | 37568790 | 37571987 |
| chr17 | 37570636 | 37585430 |
| chr17 | 37571790 | 37585430 |
| chr17 | 37576340 | 37585430 |
| chr17 | 37619767 | 37621520 |
| chr17 | 37620872 | 37632298 |
| chr17 | 37625894 | 37628672 |
| chr17 | 3814321  | 3816270  |
| chr17 | 3814321  | 3818572  |
| chr17 | 3816115  | 3822052  |
| chr17 | 3821952  | 3826215  |
| chr17 | 38361710 | 38366417 |
| chr17 | 38361710 | 38368050 |
| chr17 | 38361710 | 38377842 |
| chr17 | 38395308 | 38395998 |
| chr17 | 38462845 | 38463382 |
| chr17 | 38466166 | 38500628 |
| chr17 | 38736089 | 38740442 |
| chr17 | 38777686 | 38786920 |
| chr17 | 38784242 | 38786920 |
| chr17 | 38806764 | 38815097 |

|       |          |          |
|-------|----------|----------|
| chr17 | 39202316 | 39203109 |
| chr17 | 39268826 | 39281463 |
| chr17 | 39281388 | 39285573 |
| chr17 | 39281388 | 39297195 |
| chr17 | 39297126 | 39301075 |
| chr17 | 39297126 | 39303639 |
| chr17 | 39297126 | 39343241 |
| chr17 | 39415025 | 39419918 |
| chr17 | 39419716 | 39424738 |
| chr17 | 39423326 | 39424738 |
| chr17 | 39423326 | 39427790 |
| chr17 | 39424626 | 39432016 |
| chr17 | 39424626 | 39439193 |
| chr17 | 39427700 | 39432016 |
| chr17 | 39427700 | 39439193 |
| chr17 | 39427700 | 39440677 |
| chr17 | 39427700 | 39447904 |
| chr17 | 39431114 | 39434320 |
| chr17 | 39439164 | 39443628 |
| chr17 | 3947390  | 3951685  |
| chr17 | 39490556 | 39492890 |
| chr17 | 39490556 | 39494694 |
| chr17 | 39490556 | 39511630 |
| chr17 | 39490556 | 39526316 |
| chr17 | 39515730 | 39526316 |
| chr17 | 39684596 | 39686019 |
| chr17 | 39708320 | 39710481 |
| chr17 | 39723318 | 39723660 |
| chr17 | 39723911 | 39725204 |
| chr17 | 39908957 | 39909924 |
| chr17 | 39986574 | 39995295 |
| chr17 | 39989738 | 39990197 |
| chr17 | 39994953 | 39995295 |
| chr17 | 39994953 | 39995527 |
| chr17 | 40035116 | 40036154 |
| chr17 | 40053297 | 40053635 |
| chr17 | 40096442 | 40097403 |
| chr17 | 4013448  | 4019769  |
| chr17 | 40161752 | 40162901 |
| chr17 | 40169323 | 40169662 |
| chr17 | 4021128  | 4022828  |
| chr17 | 40256390 | 40265146 |
| chr17 | 40256390 | 40277184 |
| chr17 | 40260534 | 40262641 |
| chr17 | 40273789 | 40277184 |

|       |          |          |
|-------|----------|----------|
| chr17 | 40289407 | 40291668 |
| chr17 | 40291057 | 40291668 |
| chr17 | 40293455 | 40294503 |
| chr17 | 40295355 | 40296767 |
| chr17 | 4032125  | 4033002  |
| chr17 | 4032125  | 4034292  |
| chr17 | 40391505 | 40392737 |
| chr17 | 40391505 | 40395539 |
| chr17 | 40395448 | 40396465 |
| chr17 | 40404790 | 40411455 |
| chr17 | 40406383 | 40406942 |
| chr17 | 40406383 | 40408630 |
| chr17 | 40406383 | 40413625 |
| chr17 | 40411108 | 40413625 |
| chr17 | 40411644 | 40413292 |
| chr17 | 40412758 | 40413625 |
| chr17 | 40413194 | 40416068 |
| chr17 | 4049707  | 4051043  |
| chr17 | 4051970  | 4064829  |
| chr17 | 4051970  | 4067242  |
| chr17 | 4064360  | 4067242  |
| chr17 | 4066446  | 4067242  |
| chr17 | 4066446  | 4072756  |
| chr17 | 4081375  | 4086655  |
| chr17 | 4085669  | 4086655  |
| chr17 | 4102316  | 4117166  |
| chr17 | 4109652  | 4124051  |
| chr17 | 4114298  | 4124051  |
| chr17 | 41378955 | 41379731 |
| chr17 | 4169197  | 4172680  |
| chr17 | 4172555  | 4179877  |
| chr17 | 4173353  | 4174056  |
| chr17 | 4173353  | 4182349  |
| chr17 | 4173908  | 4179057  |
| chr17 | 41803286 | 41811284 |
| chr17 | 41828789 | 41832477 |
| chr17 | 4183397  | 4185046  |
| chr17 | 41871688 | 41884274 |
| chr17 | 41883121 | 41886308 |
| chr17 | 4189381  | 4209947  |
| chr17 | 41898630 | 41905658 |
| chr17 | 41898630 | 41910284 |
| chr17 | 41909509 | 41910284 |
| chr17 | 4197372  | 4209947  |
| chr17 | 41981854 | 41982401 |

|       |          |          |
|-------|----------|----------|
| chr17 | 41987818 | 41990382 |
| chr17 | 41996310 | 41997239 |
| chr17 | 4206320  | 4209947  |
| chr17 | 4206320  | 4217118  |
| chr17 | 4209823  | 4235890  |
| chr17 | 4216982  | 4242448  |
| chr17 | 42207557 | 42217464 |
| chr17 | 42217159 | 42217464 |
| chr17 | 42217159 | 42232137 |
| chr17 | 42223381 | 42227685 |
| chr17 | 42227528 | 42232137 |
| chr17 | 42324710 | 42325061 |
| chr17 | 42329409 | 42329776 |
| chr17 | 42337434 | 42338812 |
| chr17 | 42345558 | 42348517 |
| chr17 | 42345558 | 42348539 |
| chr17 | 42346568 | 42348539 |
| chr17 | 4235771  | 4242448  |
| chr17 | 42468009 | 42470218 |
| chr17 | 42480666 | 42487367 |
| chr17 | 42480666 | 42494473 |
| chr17 | 42498923 | 42501304 |
| chr17 | 42500706 | 42501304 |
| chr17 | 42538338 | 42541206 |
| chr17 | 42568836 | 42569303 |
| chr17 | 42568836 | 42570183 |
| chr17 | 42612074 | 42613073 |
| chr17 | 42703739 | 42708083 |
| chr17 | 42703739 | 42722915 |
| chr17 | 42703739 | 42724424 |
| chr17 | 42706006 | 42708083 |
| chr17 | 42706006 | 42719207 |
| chr17 | 42712288 | 42713389 |
| chr17 | 42727634 | 42728952 |
| chr17 | 42727634 | 42730918 |
| chr17 | 42787277 | 42788797 |
| chr17 | 42813947 | 42820841 |
| chr17 | 42818220 | 42820841 |
| chr17 | 4282797  | 4289408  |
| chr17 | 4282797  | 4296814  |
| chr17 | 4282797  | 4307123  |
| chr17 | 42834343 | 42839380 |
| chr17 | 42838092 | 42839012 |
| chr17 | 42838730 | 42839380 |
| chr17 | 4289229  | 4296814  |

|       |          |          |
|-------|----------|----------|
| chr17 | 4296716  | 4307123  |
| chr17 | 43047642 | 43057135 |
| chr17 | 43049120 | 43057135 |
| chr17 | 43049120 | 43074521 |
| chr17 | 43057051 | 43063951 |
| chr17 | 43063332 | 43074521 |
| chr17 | 43067607 | 43074521 |
| chr17 | 43095845 | 43104956 |
| chr17 | 43097243 | 43115779 |
| chr17 | 43097243 | 43124115 |
| chr17 | 43099774 | 43104956 |
| chr17 | 43099774 | 43115779 |
| chr17 | 43099774 | 43124115 |
| chr17 | 43104121 | 43115779 |
| chr17 | 43104121 | 43124115 |
| chr17 | 43177935 | 43186444 |
| chr17 | 43377670 | 43381660 |
| chr17 | 43489448 | 43493040 |
| chr17 | 43498861 | 43500103 |
| chr17 | 43498861 | 43504825 |
| chr17 | 43504643 | 43508520 |
| chr17 | 43508338 | 43520267 |
| chr17 | 43521368 | 43522226 |
| chr17 | 43808955 | 43811205 |
| chr17 | 43808955 | 43818110 |
| chr17 | 43816037 | 43824005 |
| chr17 | 44110728 | 44117704 |
| chr17 | 44145202 | 44152777 |
| chr17 | 44150960 | 44152777 |
| chr17 | 44154555 | 44155411 |
| chr17 | 44154555 | 44157941 |
| chr17 | 44195096 | 44196079 |
| chr17 | 44210123 | 44218296 |
| chr17 | 44215653 | 44216704 |
| chr17 | 44405920 | 44436545 |
| chr17 | 44405920 | 44464544 |
| chr17 | 44424348 | 44436545 |
| chr17 | 44424348 | 44464544 |
| chr17 | 44424348 | 44474903 |
| chr17 | 44435064 | 44464544 |
| chr17 | 44435064 | 44474903 |
| chr17 | 44729904 | 44734163 |
| chr17 | 44852408 | 44855004 |
| chr17 | 44857074 | 44860543 |
| chr17 | 44857074 | 44865065 |

|       |          |          |
|-------|----------|----------|
| chr17 | 44862712 | 44865065 |
| chr17 | 44875933 | 44880644 |
| chr17 | 44879555 | 44883724 |
| chr17 | 44933922 | 44936358 |
| chr17 | 45081643 | 45086652 |
| chr17 | 45081643 | 45096285 |
| chr17 | 45120324 | 45121372 |
| chr17 | 45237280 | 45239065 |
| chr17 | 45273502 | 45274593 |
| chr17 | 4542463  | 4543165  |
| chr17 | 45450617 | 45454272 |
| chr17 | 4547957  | 4549442  |
| chr17 | 45991459 | 45996664 |
| chr17 | 46038537 | 46094701 |
| chr17 | 46050532 | 46067667 |
| chr17 | 46050532 | 46082542 |
| chr17 | 46050532 | 46094701 |
| chr17 | 46066536 | 46082542 |
| chr17 | 46066536 | 46094701 |
| chr17 | 46066536 | 46172232 |
| chr17 | 46082440 | 46094701 |
| chr17 | 46094559 | 46172232 |
| chr17 | 46674413 | 46728934 |
| chr17 | 46692902 | 46704854 |
| chr17 | 46710962 | 46713986 |
| chr17 | 4682501  | 4691442  |
| chr17 | 46935028 | 46938704 |
| chr17 | 47129392 | 47143982 |
| chr17 | 47132256 | 47138891 |
| chr17 | 47132256 | 47142436 |
| chr17 | 47137151 | 47138891 |
| chr17 | 47137151 | 47143982 |
| chr17 | 47137151 | 47151918 |
| chr17 | 47137151 | 47172064 |
| chr17 | 47138738 | 47151918 |
| chr17 | 47141852 | 47151918 |
| chr17 | 47143882 | 47151918 |
| chr17 | 47143882 | 47154786 |
| chr17 | 47143882 | 47172064 |
| chr17 | 47151805 | 47170042 |
| chr17 | 47156912 | 47170042 |
| chr17 | 47157229 | 47158303 |
| chr17 | 47169916 | 47172064 |
| chr17 | 47326225 | 47345098 |
| chr17 | 47328268 | 47344292 |



|       |          |          |
|-------|----------|----------|
| chr17 | 47328268 | 47345098 |
| chr17 | 47335195 | 47345098 |
| chr17 | 47370436 | 47377903 |
| chr17 | 47370436 | 47379253 |
| chr17 | 4738407  | 4738920  |
| chr17 | 47391436 | 47414919 |
| chr17 | 47394024 | 47404633 |
| chr17 | 47402131 | 47409691 |
| chr17 | 47402131 | 47414919 |
| chr17 | 47585499 | 47590881 |
| chr17 | 47587229 | 47599739 |
| chr17 | 47587229 | 47601747 |
| chr17 | 47590716 | 47601747 |
| chr17 | 47590716 | 47605552 |
| chr17 | 47590716 | 47613725 |
| chr17 | 47596352 | 47599739 |
| chr17 | 47599675 | 47605552 |
| chr17 | 47601607 | 47605552 |
| chr17 | 47601607 | 47619164 |
| chr17 | 47603914 | 47613725 |
| chr17 | 47613668 | 47619164 |
| chr17 | 47618349 | 47619164 |
| chr17 | 47618349 | 47619784 |
| chr17 | 47656859 | 47658660 |
| chr17 | 47663088 | 47665158 |
| chr17 | 47663088 | 47668410 |
| chr17 | 47663088 | 47670832 |
| chr17 | 47663088 | 47674782 |
| chr17 | 47664158 | 47668410 |
| chr17 | 47664158 | 47670832 |
| chr17 | 47664158 | 47674782 |
| chr17 | 47664158 | 47678413 |
| chr17 | 47664158 | 47680669 |
| chr17 | 47669677 | 47674782 |
| chr17 | 47669677 | 47677127 |
| chr17 | 47676408 | 47677127 |
| chr17 | 47678045 | 47678413 |
| chr17 | 47698594 | 47699697 |
| chr17 | 47826636 | 47828670 |
| chr17 | 48050606 | 48056598 |
| chr17 | 48112030 | 48113401 |
| chr17 | 48118703 | 48119186 |
| chr17 | 4880983  | 4881257  |
| chr17 | 48848063 | 48860449 |
| chr17 | 48910807 | 48922937 |

|       |          |          |
|-------|----------|----------|
| chr17 | 48916075 | 48921272 |
| chr17 | 48916075 | 48922937 |
| chr17 | 4895697  | 4896813  |
| chr17 | 49038167 | 49040091 |
| chr17 | 49041377 | 49042377 |
| chr17 | 49311311 | 49312042 |
| chr17 | 49311311 | 49312845 |
| chr17 | 4938338  | 4938975  |
| chr17 | 4952794  | 4953845  |
| chr17 | 49611279 | 49619385 |
| chr17 | 49618980 | 49622876 |
| chr17 | 49621945 | 49622876 |
| chr17 | 4969629  | 4986286  |
| chr17 | 49719759 | 49720436 |
| chr17 | 49805362 | 49809208 |
| chr17 | 49805362 | 49811574 |
| chr17 | 4982756  | 4986286  |
| chr17 | 5003997  | 5007342  |
| chr17 | 5006914  | 5014837  |
| chr17 | 50073915 | 50081408 |
| chr17 | 50075598 | 50076681 |
| chr17 | 50075598 | 50077447 |
| chr17 | 50075598 | 50078926 |
| chr17 | 5013652  | 5014837  |
| chr17 | 50354407 | 50356773 |
| chr17 | 50696939 | 50700716 |
| chr17 | 50736959 | 50741731 |
| chr17 | 50736959 | 50743810 |
| chr17 | 50741101 | 50741731 |
| chr17 | 50970706 | 50987237 |
| chr17 | 50970706 | 50989872 |
| chr17 | 50979745 | 50987237 |
| chr17 | 50979745 | 50989872 |
| chr17 | 50979745 | 50995533 |
| chr17 | 50982523 | 50985778 |
| chr17 | 50982523 | 50987237 |
| chr17 | 50982523 | 50990668 |
| chr17 | 50984922 | 50987237 |
| chr17 | 50990449 | 50993935 |
| chr17 | 50993763 | 50995533 |
| chr17 | 50993763 | 51001845 |
| chr17 | 50998443 | 50999717 |
| chr17 | 51014231 | 51021365 |
| chr17 | 51014231 | 51056482 |
| chr17 | 51020158 | 51021365 |

|       |          |          |
|-------|----------|----------|
| chr17 | 51020158 | 51031722 |
| chr17 | 51020158 | 51041651 |
| chr17 | 51031680 | 51056482 |
| chr17 | 51041500 | 51056482 |
| chr17 | 51041500 | 51079704 |
| chr17 | 51047374 | 51056482 |
| chr17 | 51056411 | 51079704 |
| chr17 | 51201591 | 51203228 |
| chr17 | 51206887 | 51217416 |
| chr17 | 51217333 | 51220463 |
| chr17 | 51217333 | 51225209 |
| chr17 | 51218929 | 51225209 |
| chr17 | 51263273 | 51268904 |
| chr17 | 51263273 | 51273450 |
| chr17 | 51263273 | 51288203 |
| chr17 | 51268836 | 51280479 |
| chr17 | 51273361 | 51280479 |
| chr17 | 51275865 | 51280479 |
| chr17 | 5214049  | 5215293  |
| chr17 | 5214049  | 5223484  |
| chr17 | 5308693  | 5332152  |
| chr17 | 5308693  | 5346925  |
| chr17 | 532841   | 537176   |
| chr17 | 5335183  | 5338138  |
| chr17 | 5335183  | 5346925  |
| chr17 | 5338018  | 5361675  |
| chr17 | 5338018  | 5363016  |
| chr17 | 5346789  | 5350629  |
| chr17 | 5350450  | 5365238  |
| chr17 | 5354358  | 5363016  |
| chr17 | 5354358  | 5368468  |
| chr17 | 5361207  | 5363016  |
| chr17 | 5361207  | 5365238  |
| chr17 | 5361207  | 5368468  |
| chr17 | 5361207  | 5378232  |
| chr17 | 5365121  | 5368468  |
| chr17 | 5388801  | 5399650  |
| chr17 | 5388801  | 5404246  |
| chr17 | 5388801  | 5414134  |
| chr17 | 5394890  | 5414134  |
| chr17 | 5399551  | 5404246  |
| chr17 | 5410702  | 5416682  |
| chr17 | 5448808  | 5462546  |
| chr17 | 5450202  | 5450934  |
| chr17 | 5460938  | 5462546  |

|       |          |          |
|-------|----------|----------|
| chr17 | 5460938  | 5463689  |
| chr17 | 54905488 | 54915862 |
| chr17 | 54905488 | 54939020 |
| chr17 | 54905488 | 54950126 |
| chr17 | 54912665 | 54915862 |
| chr17 | 54912665 | 54947312 |
| chr17 | 54913747 | 54930206 |
| chr17 | 54930072 | 54939020 |
| chr17 | 54938923 | 54947312 |
| chr17 | 54938923 | 54950126 |
| chr17 | 54985613 | 54990957 |
| chr17 | 54985613 | 55000883 |
| chr17 | 54999344 | 55007597 |
| chr17 | 55031167 | 55047154 |
| chr17 | 55031167 | 55073076 |
| chr17 | 55031167 | 55081183 |
| chr17 | 551871   | 586364   |
| chr17 | 562502   | 655953   |
| chr17 | 56844018 | 56845809 |
| chr17 | 56844018 | 56848065 |
| chr17 | 56844018 | 56849232 |
| chr17 | 56844018 | 56862251 |
| chr17 | 56847921 | 56856625 |
| chr17 | 56847921 | 56858665 |
| chr17 | 56847921 | 56862251 |
| chr17 | 56848695 | 56856625 |
| chr17 | 56848695 | 56858665 |
| chr17 | 56848695 | 56862251 |
| chr17 | 56895342 | 56899180 |
| chr17 | 56895342 | 56904488 |
| chr17 | 56901418 | 56904488 |
| chr17 | 57105440 | 57119044 |
| chr17 | 57114458 | 57116261 |
| chr17 | 58005800 | 58006527 |
| chr17 | 58216087 | 58216736 |
| chr17 | 58613420 | 58616305 |
| chr17 | 586269   | 628231   |
| chr17 | 586269   | 631628   |
| chr17 | 586269   | 661895   |
| chr17 | 58694930 | 58696859 |
| chr17 | 58694930 | 58709990 |
| chr17 | 58696692 | 58709990 |
| chr17 | 58696692 | 58720812 |
| chr17 | 58696692 | 58724100 |
| chr17 | 58703195 | 58720812 |

|       |          |          |
|-------|----------|----------|
| chr17 | 58703195 | 58724100 |
| chr17 | 58955648 | 58972925 |
| chr17 | 58969538 | 58972925 |
| chr17 | 58999380 | 59001714 |
| chr17 | 58999380 | 59017424 |
| chr17 | 58999380 | 59070947 |
| chr17 | 59012327 | 59017424 |
| chr17 | 59012327 | 59028723 |
| chr17 | 59012327 | 59041898 |
| chr17 | 59015609 | 59017424 |
| chr17 | 59017295 | 59041898 |
| chr17 | 59031895 | 59047819 |
| chr17 | 59031895 | 59057054 |
| chr17 | 59041812 | 59057054 |
| chr17 | 59047682 | 59049393 |
| chr17 | 59047682 | 59070947 |
| chr17 | 59051213 | 59057054 |
| chr17 | 59064354 | 59070947 |
| chr17 | 59064354 | 59084089 |
| chr17 | 59070822 | 59084089 |
| chr17 | 59075646 | 59081219 |
| chr17 | 59075646 | 59084089 |
| chr17 | 59079753 | 59084089 |
| chr17 | 59081096 | 59088407 |
| chr17 | 59169747 | 59195443 |
| chr17 | 59169747 | 59197789 |
| chr17 | 59185053 | 59197789 |
| chr17 | 59193491 | 59197789 |
| chr17 | 59197543 | 59197789 |
| chr17 | 59257121 | 59267174 |
| chr17 | 59257121 | 59270995 |
| chr17 | 59570517 | 59577365 |
| chr17 | 59573739 | 59575471 |
| chr17 | 59586152 | 59588053 |
| chr17 | 59647397 | 59651316 |
| chr17 | 59648239 | 59660588 |
| chr17 | 59651202 | 59656027 |
| chr17 | 59651202 | 59664909 |
| chr17 | 59655853 | 59661643 |
| chr17 | 59664786 | 59679519 |
| chr17 | 59682906 | 59683756 |
| chr17 | 59731420 | 59738947 |
| chr17 | 59731420 | 59765138 |
| chr17 | 59731420 | 59773885 |
| chr17 | 59737452 | 59808876 |

|       |          |          |
|-------|----------|----------|
| chr17 | 59737452 | 59817773 |
| chr17 | 59738836 | 59817773 |
| chr17 | 59764970 | 59773885 |
| chr17 | 59764970 | 59817773 |
| chr17 | 59880893 | 59891041 |
| chr17 | 59910561 | 59914703 |
| chr17 | 59910561 | 59936541 |
| chr17 | 59912683 | 59914703 |
| chr17 | 59912683 | 59931722 |
| chr17 | 59926434 | 59930174 |
| chr17 | 59934433 | 59936541 |
| chr17 | 59935192 | 59940943 |
| chr17 | 60070705 | 60073886 |
| chr17 | 60180544 | 60183453 |
| chr17 | 60181323 | 60185651 |
| chr17 | 60207020 | 60208828 |
| chr17 | 60207020 | 60214774 |
| chr17 | 60236137 | 60271481 |
| chr17 | 60252380 | 60269557 |
| chr17 | 60252380 | 60294801 |
| chr17 | 60265411 | 60271481 |
| chr17 | 60265411 | 60294801 |
| chr17 | 60269449 | 60271481 |
| chr17 | 60288522 | 60301704 |
| chr17 | 60288522 | 60345608 |
| chr17 | 60294682 | 60301704 |
| chr17 | 60294682 | 60345608 |
| chr17 | 60451879 | 60479271 |
| chr17 | 60460662 | 60462061 |
| chr17 | 60460662 | 60479271 |
| chr17 | 60460662 | 60500487 |
| chr17 | 60464020 | 60494617 |
| chr17 | 60623520 | 60633977 |
| chr17 | 60623520 | 60648082 |
| chr17 | 60623520 | 60656841 |
| chr17 | 60633852 | 60648082 |
| chr17 | 60679452 | 60689761 |
| chr17 | 60679452 | 60709325 |
| chr17 | 60679452 | 60747279 |
| chr17 | 60679452 | 60808076 |
| chr17 | 60679452 | 60910702 |
| chr17 | 6080370  | 6095223  |
| chr17 | 6087989  | 6095223  |
| chr17 | 60902619 | 60924500 |
| chr17 | 60989970 | 61040892 |

|       |          |          |
|-------|----------|----------|
| chr17 | 61037888 | 61075020 |
| chr17 | 61074919 | 61084564 |
| chr17 | 6109606  | 6110935  |
| chr17 | 61715950 | 61744591 |
| chr17 | 61715950 | 61776562 |
| chr17 | 61743012 | 61776562 |
| chr17 | 61743012 | 61780401 |
| chr17 | 61743012 | 61784424 |
| chr17 | 61743012 | 61793729 |
| chr17 | 61743012 | 61808757 |
| chr17 | 61744431 | 61780401 |
| chr17 | 61776400 | 61780401 |
| chr17 | 61776400 | 61781005 |
| chr17 | 61776400 | 61799299 |
| chr17 | 61776400 | 61801474 |
| chr17 | 61780260 | 61808757 |
| chr17 | 61780839 | 61801474 |
| chr17 | 61793596 | 61861569 |
| chr17 | 61847100 | 61861569 |
| chr17 | 61857057 | 61859907 |
| chr17 | 61877886 | 61881171 |
| chr17 | 61881006 | 61904585 |
| chr17 | 61889785 | 61891689 |
| chr17 | 61889785 | 61897739 |
| chr17 | 61904459 | 61919513 |
| chr17 | 61904459 | 61925099 |
| chr17 | 61919399 | 61925099 |
| chr17 | 61921724 | 61925099 |
| chr17 | 61950824 | 61956481 |
| chr17 | 61952964 | 61961779 |
| chr17 | 61960866 | 61962971 |
| chr17 | 61965005 | 61968258 |
| chr17 | 61972726 | 61983114 |
| chr17 | 61982197 | 61985090 |
| chr17 | 61984170 | 61985090 |
| chr17 | 61984170 | 61987128 |
| chr17 | 61987006 | 61995365 |
| chr17 | 61992539 | 62011233 |
| chr17 | 62010549 | 62063301 |
| chr17 | 62029540 | 62035608 |
| chr17 | 62029540 | 62052705 |
| chr17 | 62029540 | 62063301 |
| chr17 | 62033786 | 62035608 |
| chr17 | 623532   | 627316   |
| chr17 | 623532   | 628231   |

|       |          |          |
|-------|----------|----------|
| chr17 | 623532   | 631628   |
| chr17 | 623532   | 653410   |
| chr17 | 623532   | 661895   |
| chr17 | 62520772 | 62524331 |
| chr17 | 62520772 | 62536337 |
| chr17 | 62524235 | 62536337 |
| chr17 | 62524235 | 62553755 |
| chr17 | 62536169 | 62565137 |
| chr17 | 62552301 | 62553755 |
| chr17 | 62552301 | 62565137 |
| chr17 | 62560015 | 62565137 |
| chr17 | 62578476 | 62580192 |
| chr17 | 62586134 | 62606241 |
| chr17 | 62664547 | 62667533 |
| chr17 | 62666093 | 62667533 |
| chr17 | 63099174 | 63200957 |
| chr17 | 63193990 | 63200957 |
| chr17 | 63237813 | 63267873 |
| chr17 | 63267747 | 63355390 |
| chr17 | 63314387 | 63319090 |
| chr17 | 63340100 | 63355390 |
| chr17 | 63340100 | 63389544 |
| chr17 | 63340100 | 63398914 |
| chr17 | 63351249 | 63355390 |
| chr17 | 63379717 | 63395928 |
| chr17 | 63578469 | 63579448 |
| chr17 | 63578469 | 63579943 |
| chr17 | 63578469 | 63583711 |
| chr17 | 63578469 | 63589237 |
| chr17 | 63585210 | 63589237 |
| chr17 | 63604533 | 63606440 |
| chr17 | 63632680 | 63652656 |
| chr17 | 63632680 | 63657907 |
| chr17 | 63634708 | 63657907 |
| chr17 | 63704340 | 63714108 |
| chr17 | 63751939 | 63752799 |
| chr17 | 63751939 | 63754518 |
| chr17 | 63756239 | 63766194 |
| chr17 | 63760913 | 63764190 |
| chr17 | 63760913 | 63764847 |
| chr17 | 63760913 | 63766194 |
| chr17 | 63764015 | 63764847 |
| chr17 | 63764015 | 63766194 |
| chr17 | 63787033 | 63792562 |
| chr17 | 63787033 | 63800617 |



|       |          |          |
|-------|----------|----------|
| chr17 | 63792411 | 63800617 |
| chr17 | 63792411 | 63806654 |
| chr17 | 63792411 | 63809659 |
| chr17 | 63798037 | 63800617 |
| chr17 | 63800467 | 63805175 |
| chr17 | 63800467 | 63807900 |
| chr17 | 63805070 | 63809659 |
| chr17 | 63835411 | 63837044 |
| chr17 | 64171099 | 64188415 |
| chr17 | 64171099 | 64188436 |
| chr17 | 64480288 | 64482999 |
| chr17 | 64485727 | 64493021 |
| chr17 | 64519320 | 64522895 |
| chr17 | 64519320 | 64529427 |
| chr17 | 64521401 | 64522895 |
| chr17 | 64522701 | 64526200 |
| chr17 | 64551583 | 64562966 |
| chr17 | 64551583 | 64586170 |
| chr17 | 64555819 | 64571956 |
| chr17 | 64557607 | 64578576 |
| chr17 | 64561499 | 64562966 |
| chr17 | 64561499 | 64571956 |
| chr17 | 64561499 | 64580991 |
| chr17 | 64561499 | 64586170 |
| chr17 | 64562770 | 64571956 |
| chr17 | 64562770 | 64583544 |
| chr17 | 64571797 | 64583544 |
| chr17 | 64571797 | 64586170 |
| chr17 | 64571797 | 64591149 |
| chr17 | 64571797 | 64598490 |
| chr17 | 64571797 | 64606640 |
| chr17 | 64578491 | 64580991 |
| chr17 | 64578491 | 64606640 |
| chr17 | 64580788 | 64598490 |
| chr17 | 64583460 | 64586170 |
| chr17 | 64583460 | 64606640 |
| chr17 | 64586085 | 64598490 |
| chr17 | 64591083 | 64593573 |
| chr17 | 64591083 | 64598490 |
| chr17 | 64591083 | 64606640 |
| chr17 | 64751806 | 64764548 |
| chr17 | 64754004 | 64762710 |
| chr17 | 64786566 | 64797409 |
| chr17 | 64821766 | 64822393 |
| chr17 | 653290   | 655953   |

|       |          |          |
|-------|----------|----------|
| chr17 | 653290   | 661895   |
| chr17 | 65689128 | 65750724 |
| chr17 | 65743067 | 65750724 |
| chr17 | 6589778  | 6590630  |
| chr17 | 6589778  | 6600458  |
| chr17 | 6594971  | 6600458  |
| chr17 | 6594971  | 6612148  |
| chr17 | 66027500 | 66030023 |
| chr17 | 66053735 | 66183307 |
| chr17 | 66062962 | 66070001 |
| chr17 | 66062962 | 66096632 |
| chr17 | 6606872  | 6610160  |
| chr17 | 66096250 | 66183307 |
| chr17 | 66129745 | 66183307 |
| chr17 | 66175043 | 66183307 |
| chr17 | 66176829 | 66183307 |
| chr17 | 6620787  | 6635171  |
| chr17 | 6628116  | 6635171  |
| chr17 | 66687110 | 66689047 |
| chr17 | 66687110 | 66742760 |
| chr17 | 66732687 | 66742760 |
| chr17 | 66732687 | 66774067 |
| chr17 | 67114323 | 67124014 |
| chr17 | 67137930 | 67178926 |
| chr17 | 67145742 | 67151224 |
| chr17 | 67166477 | 67167796 |
| chr17 | 67193966 | 67203443 |
| chr17 | 67215898 | 67218822 |
| chr17 | 67342185 | 67344780 |
| chr17 | 67344605 | 67350336 |
| chr17 | 67347115 | 67350336 |
| chr17 | 67347335 | 67348654 |
| chr17 | 67724048 | 67736023 |
| chr17 | 67853939 | 67866687 |
| chr17 | 67866463 | 67886316 |
| chr17 | 67886127 | 67904840 |
| chr17 | 67891843 | 67893725 |
| chr17 | 67891843 | 67894165 |
| chr17 | 67891843 | 67904840 |
| chr17 | 67920014 | 67922990 |
| chr17 | 67928354 | 67929487 |
| chr17 | 67931910 | 67944372 |
| chr17 | 67945408 | 67948306 |
| chr17 | 67945408 | 67964404 |
| chr17 | 67959540 | 67975958 |

|       |          |          |
|-------|----------|----------|
| chr17 | 68037109 | 68045921 |
| chr17 | 68114421 | 68125480 |
| chr17 | 68250187 | 68251178 |
| chr17 | 68306942 | 68385172 |
| chr17 | 68368547 | 68370524 |
| chr17 | 68444492 | 68450897 |
| chr17 | 68444492 | 68452992 |
| chr17 | 68522755 | 68524958 |
| chr17 | 69273958 | 69284072 |
| chr17 | 697417   | 710613   |
| chr17 | 7224145  | 7224552  |
| chr17 | 7224320  | 7224884  |
| chr17 | 72648802 | 72649268 |
| chr17 | 7313028  | 7314597  |
| chr17 | 73196899 | 73203793 |
| chr17 | 73202999 | 73203793 |
| chr17 | 7321864  | 7322866  |
| chr17 | 7321864  | 7323123  |
| chr17 | 74243373 | 74250357 |
| chr17 | 7465710  | 7467327  |
| chr17 | 7499038  | 7499491  |
| chr17 | 7499038  | 7503791  |
| chr17 | 7499038  | 7508475  |
| chr17 | 7503120  | 7503490  |
| chr17 | 75040091 | 75042659 |
| chr17 | 75042180 | 75042659 |
| chr17 | 75147555 | 75148671 |
| chr17 | 75148528 | 75149185 |
| chr17 | 75174751 | 75181188 |
| chr17 | 75208526 | 75209985 |
| chr17 | 75208526 | 75213119 |
| chr17 | 75208526 | 75215823 |
| chr17 | 75208526 | 75232968 |
| chr17 | 75238651 | 75240412 |
| chr17 | 75238651 | 75241696 |
| chr17 | 75242335 | 75243570 |
| chr17 | 75242335 | 75246796 |
| chr17 | 75277352 | 75278335 |
| chr17 | 75277352 | 75283593 |
| chr17 | 75321658 | 75326020 |
| chr17 | 75485427 | 75486426 |
| chr17 | 75660954 | 75661708 |
| chr17 | 75812111 | 75813878 |
| chr17 | 75899157 | 75902154 |
| chr17 | 75899157 | 75904719 |

|       |          |          |
|-------|----------|----------|
| chr17 | 75917731 | 75918269 |
| chr17 | 7594237  | 7594757  |
| chr17 | 75950773 | 75955947 |
| chr17 | 75955565 | 75955947 |
| chr17 | 75957458 | 75973785 |
| chr17 | 7595823  | 7601525  |
| chr17 | 75986186 | 75991623 |
| chr17 | 7601408  | 7606149  |
| chr17 | 7602908  | 7606149  |
| chr17 | 76043828 | 76046194 |
| chr17 | 76057402 | 76061219 |
| chr17 | 76067216 | 76070444 |
| chr17 | 76101270 | 76101863 |
| chr17 | 76287191 | 76290077 |
| chr17 | 76287191 | 76304941 |
| chr17 | 76312869 | 76313891 |
| chr17 | 76312869 | 76330098 |
| chr17 | 76738281 | 76742048 |
| chr17 | 76738281 | 76744466 |
| chr17 | 76740956 | 76769871 |
| chr17 | 76740956 | 76776541 |
| chr17 | 76767385 | 76776541 |
| chr17 | 769868   | 776988   |
| chr17 | 769868   | 778744   |
| chr17 | 78064721 | 78067923 |
| chr17 | 78064721 | 78075278 |
| chr17 | 78073036 | 78087093 |
| chr17 | 78077184 | 78086586 |
| chr17 | 78079394 | 78087093 |
| chr17 | 78086502 | 78087093 |
| chr17 | 78086502 | 78093763 |
| chr17 | 78091439 | 78093763 |
| chr17 | 78092932 | 78093763 |
| chr17 | 78117268 | 78117935 |
| chr17 | 78170816 | 78171649 |
| chr17 | 78392475 | 78398351 |
| chr17 | 78392475 | 78399537 |
| chr17 | 78392475 | 78404089 |
| chr17 | 78398251 | 78404089 |
| chr17 | 78414878 | 78419675 |
| chr17 | 78414878 | 78419725 |
| chr17 | 7850071  | 7851394  |
| chr17 | 78680189 | 78701751 |
| chr17 | 78680189 | 78709732 |
| chr17 | 78698268 | 78709732 |

|       |          |          |
|-------|----------|----------|
| chr17 | 78698819 | 78709732 |
| chr17 | 78802323 | 78803978 |
| chr17 | 78803384 | 78807636 |
| chr17 | 78812859 | 78820012 |
| chr17 | 78812859 | 78821061 |
| chr17 | 78813772 | 78814552 |
| chr17 | 78818666 | 78821061 |
| chr17 | 78827244 | 78838750 |
| chr17 | 78835279 | 78838750 |
| chr17 | 7890570  | 7891064  |
| chr17 | 79077429 | 79077864 |
| chr17 | 79077429 | 79081073 |
| chr17 | 79077429 | 79084686 |
| chr17 | 79079488 | 79081073 |
| chr17 | 79085233 | 79085734 |
| chr17 | 7939512  | 7940242  |
| chr17 | 79942059 | 79952818 |
| chr17 | 80048582 | 80050283 |
| chr17 | 80048582 | 80058980 |
| chr17 | 80049905 | 80050283 |
| chr17 | 80058493 | 80058980 |
| chr17 | 80136003 | 80138280 |
| chr17 | 80212070 | 80213885 |
| chr17 | 80263573 | 80273404 |
| chr17 | 80294719 | 80317277 |
| chr17 | 80307127 | 80309171 |
| chr17 | 803681   | 805247   |
| chr17 | 80707840 | 80754185 |
| chr17 | 80791449 | 80857900 |
| chr17 | 80883418 | 80893865 |
| chr17 | 80922723 | 80923673 |
| chr17 | 80922723 | 80925480 |
| chr17 | 80922723 | 80940601 |
| chr17 | 80940495 | 80949547 |
| chr17 | 80945666 | 80949547 |
| chr17 | 80994580 | 80995758 |
| chr17 | 80994580 | 80998420 |
| chr17 | 81053667 | 81057967 |
| chr17 | 81053667 | 81086580 |
| chr17 | 81053667 | 81108509 |
| chr17 | 81084831 | 81086580 |
| chr17 | 81099927 | 81108509 |
| chr17 | 81206743 | 81207239 |
| chr17 | 81260237 | 81277133 |
| chr17 | 81260237 | 81284895 |

|       |          |          |
|-------|----------|----------|
| chr17 | 81270917 | 81276151 |
| chr17 | 81270917 | 81277133 |
| chr17 | 81270917 | 81284895 |
| chr17 | 81275968 | 81277133 |
| chr17 | 81275968 | 81283502 |
| chr17 | 81275968 | 81284895 |
| chr17 | 81280608 | 81284895 |
| chr17 | 81569015 | 81589104 |
| chr17 | 81588943 | 81597316 |
| chr17 | 81588943 | 81600427 |
| chr17 | 81588943 | 81608822 |
| chr17 | 81596115 | 81600427 |
| chr17 | 81596115 | 81604727 |
| chr17 | 81596115 | 81608822 |
| chr17 | 81600340 | 81608822 |
| chr17 | 81604547 | 81608822 |
| chr17 | 81604547 | 81629805 |
| chr17 | 81606690 | 81608822 |
| chr17 | 81610209 | 81613494 |
| chr17 | 81610209 | 81622278 |
| chr17 | 81610209 | 81629805 |
| chr17 | 81613317 | 81629805 |
| chr17 | 8161472  | 8162369  |
| chr17 | 81667728 | 81670453 |
| chr17 | 81667728 | 81672155 |
| chr17 | 81693653 | 81694853 |
| chr17 | 81693653 | 81695067 |
| chr17 | 81700466 | 81700814 |
| chr17 | 81855141 | 81855586 |
| chr17 | 81908567 | 81909602 |
| chr17 | 81913773 | 81915681 |
| chr17 | 81979183 | 81985607 |
| chr17 | 82036383 | 82036643 |
| chr17 | 8206490  | 8207840  |
| chr17 | 82084512 | 82084953 |
| chr17 | 82092454 | 82093419 |
| chr17 | 82095319 | 82096452 |
| chr17 | 82127691 | 82128597 |
| chr17 | 82163199 | 82172860 |
| chr17 | 82171700 | 82172860 |
| chr17 | 82171700 | 82178605 |
| chr17 | 82171700 | 82179189 |
| chr17 | 82171700 | 82183932 |
| chr17 | 82178473 | 82179189 |
| chr17 | 82183773 | 82188419 |

|       |          |          |
|-------|----------|----------|
| chr17 | 82183773 | 82193830 |
| chr17 | 82183773 | 82198422 |
| chr17 | 82248874 | 82249602 |
| chr17 | 82248874 | 82265796 |
| chr17 | 82249430 | 82265796 |
| chr17 | 82252433 | 82253244 |
| chr17 | 82252433 | 82265796 |
| chr17 | 8234454  | 8237519  |
| chr17 | 8238030  | 8238629  |
| chr17 | 8238030  | 8243148  |
| chr17 | 82403936 | 82406482 |
| chr17 | 82403936 | 82409410 |
| chr17 | 82403936 | 82411530 |
| chr17 | 82444446 | 82446696 |
| chr17 | 82459991 | 82472698 |
| chr17 | 8253858  | 8254301  |
| chr17 | 8253858  | 8258199  |
| chr17 | 82563353 | 82568201 |
| chr17 | 82563353 | 82571870 |
| chr17 | 82563353 | 82587272 |
| chr17 | 82568053 | 82571870 |
| chr17 | 82571723 | 82584188 |
| chr17 | 8257806  | 8258199  |
| chr17 | 82582740 | 82587272 |
| chr17 | 82625388 | 82631022 |
| chr17 | 8262919  | 8263636  |
| chr17 | 82756164 | 82768566 |
| chr17 | 82756164 | 82772507 |
| chr17 | 82756164 | 82781721 |
| chr17 | 82756164 | 82797802 |
| chr17 | 82756164 | 82809782 |
| chr17 | 82756164 | 82814934 |
| chr17 | 82756164 | 82870380 |
| chr17 | 82756164 | 82893632 |
| chr17 | 82763964 | 82768566 |
| chr17 | 82763964 | 82772507 |
| chr17 | 82763964 | 82781721 |
| chr17 | 82763964 | 82800996 |
| chr17 | 82763964 | 82814934 |
| chr17 | 82763964 | 82870380 |
| chr17 | 82763964 | 82893632 |
| chr17 | 82763964 | 82900731 |
| chr17 | 82766266 | 82768566 |
| chr17 | 82797756 | 82800996 |
| chr17 | 82805874 | 82809782 |

|       |          |          |
|-------|----------|----------|
| chr17 | 82805874 | 82814934 |
| chr17 | 82814839 | 82889697 |
| chr17 | 82814839 | 82911789 |
| chr17 | 82870223 | 82893632 |
| chr17 | 82870223 | 82900731 |
| chr17 | 82870223 | 82903478 |
| chr17 | 82870223 | 82907821 |
| chr17 | 82870223 | 82911789 |
| chr17 | 82884144 | 82893632 |
| chr17 | 82884144 | 82900731 |
| chr17 | 82884144 | 82903478 |
| chr17 | 82884144 | 82906053 |
| chr17 | 82884144 | 82909307 |
| chr17 | 82884144 | 82911789 |
| chr17 | 82889667 | 82900731 |
| chr17 | 82889667 | 82903478 |
| chr17 | 82889667 | 82909307 |
| chr17 | 82889667 | 82911789 |
| chr17 | 82893546 | 82900731 |
| chr17 | 82893546 | 82903478 |
| chr17 | 82893546 | 82911789 |
| chr17 | 82900650 | 82906053 |
| chr17 | 82900650 | 82909307 |
| chr17 | 82900650 | 82911789 |
| chr17 | 82903404 | 82909307 |
| chr17 | 82903404 | 82911789 |
| chr17 | 82905935 | 82911789 |
| chr17 | 82905935 | 82930643 |
| chr17 | 82923651 | 82932735 |
| chr17 | 82956694 | 82961181 |
| chr17 | 82956694 | 82965746 |
| chr17 | 83005114 | 83048785 |
| chr17 | 83014453 | 83048570 |
| chr17 | 83014453 | 83048785 |
| chr17 | 83035034 | 83048785 |
| chr17 | 83048470 | 83048785 |
| chr17 | 8379795  | 8382315  |
| chr17 | 8444259  | 8450953  |
| chr17 | 8444259  | 8454887  |
| chr17 | 8444259  | 8460160  |
| chr17 | 8444259  | 8463354  |
| chr17 | 8484137  | 8492509  |
| chr17 | 8499269  | 8504906  |
| chr17 | 8499269  | 8509949  |
| chr17 | 8506317  | 8509949  |



|       |          |          |
|-------|----------|----------|
| chr17 | 8542106  | 8554018  |
| chr17 | 8552045  | 8577338  |
| chr17 | 9162812  | 9182969  |
| chr17 | 9378551  | 9557528  |
| chr17 | 9491828  | 9557528  |
| chr17 | 9505037  | 9557528  |
| chr17 | 9680230  | 9693230  |
| chr17 | 998778   | 999584   |
| chr18 | 10539761 | 10540399 |
| chr18 | 12348272 | 12353158 |
| chr18 | 12351084 | 12351413 |
| chr18 | 12351084 | 12353158 |
| chr18 | 12351084 | 12356831 |
| chr18 | 12351084 | 12371691 |
| chr18 | 12353004 | 12356831 |
| chr18 | 12353004 | 12371691 |
| chr18 | 12356693 | 12360051 |
| chr18 | 12356693 | 12371691 |
| chr18 | 12358669 | 12360051 |
| chr18 | 12358669 | 12371691 |
| chr18 | 12363781 | 12371691 |
| chr18 | 12366964 | 12367382 |
| chr18 | 12366964 | 12371691 |
| chr18 | 12370848 | 12371691 |
| chr18 | 12420324 | 12421629 |
| chr18 | 12452254 | 12635096 |
| chr18 | 12454345 | 12464958 |
| chr18 | 12463350 | 12464958 |
| chr18 | 12463350 | 12479871 |
| chr18 | 12493071 | 12535601 |
| chr18 | 12493071 | 12546904 |
| chr18 | 12506476 | 12512531 |
| chr18 | 12506476 | 12535601 |
| chr18 | 12506476 | 12546904 |
| chr18 | 12506476 | 12635096 |
| chr18 | 12535475 | 12635096 |
| chr18 | 12695253 | 12697408 |
| chr18 | 12698978 | 12701113 |
| chr18 | 12718516 | 12720683 |
| chr18 | 12794383 | 12859254 |
| chr18 | 12801969 | 12814355 |
| chr18 | 12814202 | 12831041 |
| chr18 | 12814202 | 12836891 |
| chr18 | 12814202 | 12840962 |
| chr18 | 12825809 | 12831041 |

|       |          |          |
|-------|----------|----------|
| chr18 | 12825809 | 12859254 |
| chr18 | 12951854 | 12963371 |
| chr18 | 12951854 | 12984190 |
| chr18 | 12999420 | 13001582 |
| chr18 | 12999420 | 13008631 |
| chr18 | 12999420 | 13013025 |
| chr18 | 12999420 | 13019206 |
| chr18 | 12999420 | 13030608 |
| chr18 | 12999420 | 13040956 |
| chr18 | 12999420 | 13042334 |
| chr18 | 12999420 | 13073185 |
| chr18 | 13001456 | 13019206 |
| chr18 | 13001456 | 13030608 |
| chr18 | 13008455 | 13019206 |
| chr18 | 13008455 | 13030608 |
| chr18 | 13012972 | 13019206 |
| chr18 | 13012972 | 13030608 |
| chr18 | 13029662 | 13042334 |
| chr18 | 13037236 | 13040956 |
| chr18 | 13048858 | 13059312 |
| chr18 | 13087016 | 13092527 |
| chr18 | 13087016 | 13096307 |
| chr18 | 13089455 | 13103588 |
| chr18 | 13099475 | 13103588 |
| chr18 | 13104983 | 13116503 |
| chr18 | 13104983 | 13117643 |
| chr18 | 13671861 | 13682105 |
| chr18 | 13681604 | 13687882 |
| chr18 | 13731475 | 13754147 |
| chr18 | 13734463 | 13737135 |
| chr18 | 13740166 | 13752427 |
| chr18 | 14183651 | 14189313 |
| chr18 | 14183928 | 14191917 |
| chr18 | 163307   | 180339   |
| chr18 | 163307   | 192900   |
| chr18 | 178932   | 192900   |
| chr18 | 178932   | 199316   |
| chr18 | 192841   | 199316   |
| chr18 | 192841   | 204692   |
| chr18 | 196636   | 199316   |
| chr18 | 196636   | 203190   |
| chr18 | 196636   | 204692   |
| chr18 | 197615   | 204692   |
| chr18 | 20953577 | 20955245 |
| chr18 | 20986949 | 20992937 |

|       |          |          |
|-------|----------|----------|
| chr18 | 21006350 | 21008194 |
| chr18 | 21039471 | 21042709 |
| chr18 | 21039471 | 21044186 |
| chr18 | 21039471 | 21049880 |
| chr18 | 21366026 | 21384403 |
| chr18 | 21366026 | 21395561 |
| chr18 | 21366026 | 21403994 |
| chr18 | 21383509 | 21384403 |
| chr18 | 21383509 | 21403994 |
| chr18 | 21384205 | 21403994 |
| chr18 | 21439520 | 21440388 |
| chr18 | 21439520 | 21441537 |
| chr18 | 21439520 | 21477356 |
| chr18 | 21536041 | 21568094 |
| chr18 | 21539919 | 21560990 |
| chr18 | 21539919 | 21566206 |
| chr18 | 21539919 | 21568094 |
| chr18 | 21560858 | 21566206 |
| chr18 | 21560858 | 21568094 |
| chr18 | 21564202 | 21566206 |
| chr18 | 21564202 | 21568094 |
| chr18 | 21622724 | 21623939 |
| chr18 | 21656860 | 21659343 |
| chr18 | 21656860 | 21664230 |
| chr18 | 21765771 | 21768752 |
| chr18 | 21765771 | 21773728 |
| chr18 | 21765771 | 21779685 |
| chr18 | 21765771 | 21791557 |
| chr18 | 21765771 | 21798228 |
| chr18 | 21765771 | 21799974 |
| chr18 | 21765771 | 21804014 |
| chr18 | 21765771 | 21819646 |
| chr18 | 21765771 | 21849388 |
| chr18 | 21768622 | 21773728 |
| chr18 | 21773623 | 21779685 |
| chr18 | 21773623 | 21804014 |
| chr18 | 21778102 | 21779685 |
| chr18 | 21778102 | 21804014 |
| chr18 | 21791373 | 21799974 |
| chr18 | 21791373 | 21804014 |
| chr18 | 21791373 | 21819646 |
| chr18 | 21791373 | 21844253 |
| chr18 | 21815615 | 21838497 |
| chr18 | 21815615 | 21847125 |
| chr18 | 21815615 | 21858646 |

|       |          |          |
|-------|----------|----------|
| chr18 | 21838364 | 21844253 |
| chr18 | 22171107 | 22183043 |
| chr18 | 22936753 | 22949713 |
| chr18 | 22968805 | 22982393 |
| chr18 | 22968805 | 22984990 |
| chr18 | 22975152 | 22984990 |
| chr18 | 22984885 | 22991049 |
| chr18 | 22990936 | 22996462 |
| chr18 | 22992747 | 22993847 |
| chr18 | 22992747 | 22996462 |
| chr18 | 23001585 | 23006432 |
| chr18 | 23006362 | 23022270 |
| chr18 | 23213976 | 23237245 |
| chr18 | 23234607 | 23237245 |
| chr18 | 23309679 | 23373763 |
| chr18 | 23352195 | 23373763 |
| chr18 | 23466132 | 23467526 |
| chr18 | 23467398 | 23479424 |
| chr18 | 23506969 | 23509279 |
| chr18 | 23515855 | 23519174 |
| chr18 | 23520201 | 23524482 |
| chr18 | 23561359 | 23572180 |
| chr18 | 23568822 | 23573574 |
| chr18 | 23777556 | 23784157 |
| chr18 | 23833827 | 23842750 |
| chr18 | 23898737 | 23899455 |
| chr18 | 24064139 | 24069271 |
| chr18 | 24064139 | 24083081 |
| chr18 | 24080584 | 24083081 |
| chr18 | 24118124 | 24125550 |
| chr18 | 24123833 | 24125550 |
| chr18 | 24123833 | 24130417 |
| chr18 | 24155700 | 24160069 |
| chr18 | 24166578 | 24171498 |
| chr18 | 24166578 | 24172483 |
| chr18 | 24178012 | 24179835 |
| chr18 | 24196124 | 24239382 |
| chr18 | 24225041 | 24239382 |
| chr18 | 24280841 | 24314347 |
| chr18 | 24280841 | 24341658 |
| chr18 | 24280841 | 24377535 |
| chr18 | 24303636 | 24312106 |
| chr18 | 24303636 | 24341658 |
| chr18 | 24332941 | 24341658 |
| chr18 | 24366891 | 24368372 |

|       |          |          |
|-------|----------|----------|
| chr18 | 24366891 | 24377535 |
| chr18 | 24427918 | 24428921 |
| chr18 | 24427918 | 24440618 |
| chr18 | 246323   | 252612   |
| chr18 | 2544194  | 2555038  |
| chr18 | 2577745  | 2579029  |
| chr18 | 26032398 | 26057742 |
| chr18 | 26038554 | 26078160 |
| chr18 | 26052623 | 26078160 |
| chr18 | 26052623 | 26087577 |
| chr18 | 26265169 | 26293531 |
| chr18 | 26274662 | 26293531 |
| chr18 | 26285881 | 26357794 |
| chr18 | 26292245 | 26327140 |
| chr18 | 26315228 | 26335231 |
| chr18 | 26315228 | 26357794 |
| chr18 | 26321069 | 26335231 |
| chr18 | 26476514 | 26501250 |
| chr18 | 2666156  | 2673363  |
| chr18 | 2666156  | 2674145  |
| chr18 | 2666156  | 2688747  |
| chr18 | 2673280  | 2674145  |
| chr18 | 2688393  | 2688747  |
| chr18 | 2694526  | 2698041  |
| chr18 | 2703691  | 2707645  |
| chr18 | 2706363  | 2729409  |
| chr18 | 2718314  | 2726524  |
| chr18 | 2718314  | 2728596  |
| chr18 | 2732264  | 2740821  |
| chr18 | 2732264  | 2762236  |
| chr18 | 2738396  | 2739520  |
| chr18 | 2762104  | 2771618  |
| chr18 | 2769693  | 2770108  |
| chr18 | 2771532  | 2777915  |
| chr18 | 2775733  | 2784621  |
| chr18 | 2777805  | 2784621  |
| chr18 | 2784449  | 2796521  |
| chr18 | 27963356 | 28013909 |
| chr18 | 28002996 | 28013909 |
| chr18 | 2920777  | 2940712  |
| chr18 | 2951054  | 2960849  |
| chr18 | 31530986 | 31535412 |
| chr18 | 31626282 | 31645479 |
| chr18 | 31630958 | 31658089 |
| chr18 | 31630958 | 31666372 |

|       |          |          |
|-------|----------|----------|
| chr18 | 31638643 | 31658089 |
| chr18 | 31638643 | 31666372 |
| chr18 | 31645354 | 31666372 |
| chr18 | 31657975 | 31666372 |
| chr18 | 31839311 | 31855807 |
| chr18 | 31846715 | 31849739 |
| chr18 | 31846715 | 31852663 |
| chr18 | 31864626 | 31867476 |
| chr18 | 31864626 | 31871120 |
| chr18 | 31870371 | 31871120 |
| chr18 | 31873429 | 31901025 |
| chr18 | 31873429 | 31917667 |
| chr18 | 31890734 | 31909760 |
| chr18 | 31890734 | 31913522 |
| chr18 | 31897785 | 31909760 |
| chr18 | 31897785 | 31917667 |
| chr18 | 31897785 | 31931523 |
| chr18 | 31907459 | 31931523 |
| chr18 | 32042178 | 32045732 |
| chr18 | 32111753 | 32113860 |
| chr18 | 32111753 | 32124845 |
| chr18 | 32111753 | 32126800 |
| chr18 | 32270216 | 32288203 |
| chr18 | 32270216 | 32310323 |
| chr18 | 3249360  | 3254050  |
| chr18 | 3253232  | 3254050  |
| chr18 | 35478281 | 35480563 |
| chr18 | 35478281 | 35489385 |
| chr18 | 35683390 | 35692320 |
| chr18 | 36026899 | 36031097 |
| chr18 | 36026899 | 36033837 |
| chr18 | 36030807 | 36031097 |
| chr18 | 36112500 | 36127016 |
| chr18 | 36133237 | 36138872 |
| chr18 | 36141136 | 36160015 |
| chr18 | 36142280 | 36159830 |
| chr18 | 36142280 | 36160015 |
| chr18 | 36144938 | 36146381 |
| chr18 | 36160931 | 36171160 |
| chr18 | 36195256 | 36203189 |
| chr18 | 36195256 | 36205276 |
| chr18 | 36195256 | 36220217 |
| chr18 | 36198689 | 36200324 |
| chr18 | 36198689 | 36205276 |
| chr18 | 36213365 | 36257073 |

|       |          |          |
|-------|----------|----------|
| chr18 | 36220054 | 36251283 |
| chr18 | 36220054 | 36260175 |
| chr18 | 36256967 | 36260175 |
| chr18 | 36501931 | 36512543 |
| chr18 | 36576450 | 36658188 |
| chr18 | 36658074 | 36681570 |
| chr18 | 36658074 | 36693423 |
| chr18 | 36681435 | 36693423 |
| chr18 | 36681435 | 36709391 |
| chr18 | 36755118 | 36769426 |
| chr18 | 36834319 | 36959435 |
| chr18 | 37160199 | 37173081 |
| chr18 | 41993269 | 42033957 |
| chr18 | 41996637 | 42020705 |
| chr18 | 42015475 | 42029441 |
| chr18 | 42027442 | 42040741 |
| chr18 | 42027442 | 42043817 |
| chr18 | 42027442 | 42049605 |
| chr18 | 42037691 | 42049605 |
| chr18 | 42038780 | 42049605 |
| chr18 | 42043732 | 42049605 |
| chr18 | 45865614 | 45867748 |
| chr18 | 45866797 | 45870742 |
| chr18 | 45880074 | 45882487 |
| chr18 | 45880074 | 45912456 |
| chr18 | 45889797 | 45910742 |
| chr18 | 45899403 | 45904117 |
| chr18 | 45899403 | 45910742 |
| chr18 | 45899403 | 45912456 |
| chr18 | 45910520 | 45912456 |
| chr18 | 45913705 | 45917819 |
| chr18 | 45922340 | 45923387 |
| chr18 | 45922340 | 45946768 |
| chr18 | 45928868 | 45934966 |
| chr18 | 45928868 | 45944119 |
| chr18 | 45928868 | 45952643 |
| chr18 | 45939599 | 45952643 |
| chr18 | 45943160 | 45951238 |
| chr18 | 45948502 | 45952643 |
| chr18 | 46084503 | 46095131 |
| chr18 | 46088108 | 46095131 |
| chr18 | 46118180 | 46120060 |
| chr18 | 46122466 | 46123364 |
| chr18 | 46122466 | 46124893 |
| chr18 | 46815311 | 46821072 |

|       |          |          |
|-------|----------|----------|
| chr18 | 46815311 | 46828130 |
| chr18 | 46815311 | 46836517 |
| chr18 | 46820932 | 46844839 |
| chr18 | 46827958 | 46846841 |
| chr18 | 46836356 | 46864248 |
| chr18 | 46855344 | 46864248 |
| chr18 | 46864163 | 46891054 |
| chr18 | 47112976 | 47136449 |
| chr18 | 47130243 | 47134704 |
| chr18 | 47130243 | 47136449 |
| chr18 | 47845339 | 47896809 |
| chr18 | 47865058 | 47870564 |
| chr18 | 47865058 | 47896809 |
| chr18 | 47868322 | 47870564 |
| chr18 | 47868322 | 47896809 |
| chr18 | 48619537 | 48670744 |
| chr18 | 48636613 | 48670744 |
| chr18 | 48663751 | 48670744 |
| chr18 | 48663751 | 48711695 |
| chr18 | 48757918 | 48761689 |
| chr18 | 49097401 | 49257104 |
| chr18 | 49118743 | 49163787 |
| chr18 | 49163684 | 49379758 |
| chr18 | 49257009 | 49258493 |
| chr18 | 49257009 | 49282175 |
| chr18 | 49257009 | 49286616 |
| chr18 | 49257009 | 49379758 |
| chr18 | 49272177 | 49282175 |
| chr18 | 49272177 | 49286616 |
| chr18 | 49272177 | 49379758 |
| chr18 | 49281996 | 49286616 |
| chr18 | 49281996 | 49379758 |
| chr18 | 49331863 | 49333853 |
| chr18 | 49331863 | 49379758 |
| chr18 | 49331863 | 49391645 |
| chr18 | 49363160 | 49379758 |
| chr18 | 49363160 | 49391645 |
| chr18 | 49363160 | 49430447 |
| chr18 | 50375819 | 50385353 |
| chr18 | 50895808 | 50908196 |
| chr18 | 50895808 | 50921187 |
| chr18 | 50895808 | 50932360 |
| chr18 | 50895808 | 50940386 |
| chr18 | 50918109 | 50921187 |
| chr18 | 50918109 | 50924212 |



|       |          |          |
|-------|----------|----------|
| chr18 | 50918109 | 50925898 |
| chr18 | 50918109 | 50932360 |
| chr18 | 51046919 | 51049324 |
| chr18 | 51046919 | 51067187 |
| chr18 | 51054780 | 51059916 |
| chr18 | 51054780 | 51067187 |
| chr18 | 54159764 | 54166166 |
| chr18 | 54159764 | 54205157 |
| chr18 | 54188873 | 54205157 |
| chr18 | 54271359 | 54274090 |
| chr18 | 54271359 | 54277855 |
| chr18 | 54271359 | 54280903 |
| chr18 | 54271359 | 54284013 |
| chr18 | 54271359 | 54287411 |
| chr18 | 54271359 | 54292038 |
| chr18 | 54277702 | 54287411 |
| chr18 | 54358840 | 54365821 |
| chr18 | 54362770 | 54372597 |
| chr18 | 56614423 | 56618126 |
| chr18 | 56616244 | 56626457 |
| chr18 | 56717963 | 56731597 |
| chr18 | 56717963 | 56781656 |
| chr18 | 56717963 | 56816144 |
| chr18 | 56731382 | 56758953 |
| chr18 | 56731382 | 56781656 |
| chr18 | 56756582 | 56758953 |
| chr18 | 56756582 | 56781656 |
| chr18 | 56758864 | 56781656 |
| chr18 | 56758864 | 56816144 |
| chr18 | 56779430 | 56816144 |
| chr18 | 56781532 | 56962529 |
| chr18 | 56816030 | 56880165 |
| chr18 | 56879943 | 56962529 |
| chr18 | 56923921 | 56939393 |
| chr18 | 56935787 | 56962529 |
| chr18 | 57554259 | 57554952 |
| chr18 | 57605856 | 57609443 |
| chr18 | 57609356 | 57615730 |
| chr18 | 57611636 | 57615975 |
| chr18 | 57613601 | 57615975 |
| chr18 | 57653991 | 57662615 |
| chr18 | 57653991 | 57695532 |
| chr18 | 57671467 | 57691997 |
| chr18 | 57685071 | 57695532 |
| chr18 | 57688298 | 57695532 |

|       |          |          |
|-------|----------|----------|
| chr18 | 58165787 | 58252054 |
| chr18 | 58227829 | 58252054 |
| chr18 | 58315981 | 58325162 |
| chr18 | 58315981 | 58333892 |
| chr18 | 58322424 | 58351045 |
| chr18 | 58328994 | 58333892 |
| chr18 | 58341037 | 58351045 |
| chr18 | 58341037 | 58357252 |
| chr18 | 58342905 | 58357252 |
| chr18 | 58349536 | 58357252 |
| chr18 | 58364267 | 58367867 |
| chr18 | 58503930 | 58529238 |
| chr18 | 58514992 | 58529238 |
| chr18 | 58681169 | 58700591 |
| chr18 | 58696365 | 58700591 |
| chr18 | 58709377 | 58715967 |
| chr18 | 58709377 | 58723251 |
| chr18 | 58709377 | 58735329 |
| chr18 | 58714082 | 58734381 |
| chr18 | 59338556 | 59338953 |
| chr18 | 59338556 | 59347571 |
| chr18 | 59347512 | 59349236 |
| chr18 | 59438110 | 59439816 |
| chr18 | 59466738 | 59469607 |
| chr18 | 59466738 | 59480238 |
| chr18 | 6080880  | 6093528  |
| chr18 | 6093354  | 6171942  |
| chr18 | 6093354  | 6215835  |
| chr18 | 6171827  | 6312056  |
| chr18 | 62072672 | 62085264 |
| chr18 | 62072672 | 62095950 |
| chr18 | 62082672 | 62090578 |
| chr18 | 62082672 | 62095950 |
| chr18 | 62082672 | 62101183 |
| chr18 | 62106788 | 62154651 |
| chr18 | 62114560 | 62148338 |
| chr18 | 6213148  | 6239872  |
| chr18 | 6213148  | 6312056  |
| chr18 | 62138242 | 62148338 |
| chr18 | 62138242 | 62163656 |
| chr18 | 6215749  | 6312056  |
| chr18 | 62221036 | 62232427 |
| chr18 | 62244763 | 62261658 |
| chr18 | 62244763 | 62268948 |
| chr18 | 62252663 | 62298860 |

|       |          |          |
|-------|----------|----------|
| chr18 | 62280645 | 62298860 |
| chr18 | 62348167 | 62349937 |
| chr18 | 6237963  | 6244588  |
| chr18 | 6237963  | 6264038  |
| chr18 | 62539680 | 62550460 |
| chr18 | 62539680 | 62556297 |
| chr18 | 62539680 | 62565096 |
| chr18 | 62539680 | 62575550 |
| chr18 | 62539680 | 62576652 |
| chr18 | 62542497 | 62565096 |
| chr18 | 62556202 | 62565096 |
| chr18 | 6263946  | 6312056  |
| chr18 | 62830034 | 62838909 |
| chr18 | 62830034 | 62920114 |
| chr18 | 62838783 | 62860601 |
| chr18 | 62895010 | 62903166 |
| chr18 | 62895010 | 62920114 |
| chr18 | 62958628 | 62963472 |
| chr18 | 6301902  | 6312056  |
| chr18 | 63338799 | 63362868 |
| chr18 | 63344409 | 63362868 |
| chr18 | 63350887 | 63362868 |
| chr18 | 63355203 | 63362868 |
| chr18 | 63399241 | 63400703 |
| chr18 | 63399241 | 63411578 |
| chr18 | 63979800 | 63981838 |
| chr18 | 659640   | 662320   |
| chr18 | 662145   | 669173   |
| chr18 | 662145   | 671451   |
| chr18 | 670691   | 671451   |
| chr18 | 683245   | 706578   |
| chr18 | 68697225 | 68701790 |
| chr18 | 68697225 | 68711403 |
| chr18 | 68836748 | 68874785 |
| chr18 | 6961585  | 6965432  |
| chr18 | 6961944  | 6965432  |
| chr18 | 6973056  | 6980637  |
| chr18 | 6974902  | 6980637  |
| chr18 | 69873143 | 69896045 |
| chr18 | 69946733 | 69947433 |
| chr18 | 70024721 | 70030981 |
| chr18 | 70047970 | 70060042 |
| chr18 | 70047970 | 70065922 |
| chr18 | 70047970 | 70075541 |
| chr18 | 70051410 | 70065922 |

|       |          |          |
|-------|----------|----------|
| chr18 | 70051410 | 70128546 |
| chr18 | 70065828 | 70092804 |
| chr18 | 70086612 | 70092804 |
| chr18 | 70086612 | 70128546 |
| chr18 | 70086612 | 70135280 |
| chr18 | 70092109 | 70109717 |
| chr18 | 70121555 | 70128546 |
| chr18 | 70127501 | 70128546 |
| chr18 | 70145611 | 70150733 |
| chr18 | 70166061 | 70176845 |
| chr18 | 70166061 | 70190719 |
| chr18 | 7032065  | 7046367  |
| chr18 | 7034478  | 7037751  |
| chr18 | 7043226  | 7044839  |
| chr18 | 7043226  | 7046367  |
| chr18 | 7046277  | 7050936  |
| chr18 | 7079974  | 7080457  |
| chr18 | 742917   | 743415   |
| chr18 | 742917   | 756835   |
| chr18 | 74641007 | 74890038 |
| chr18 | 74781427 | 74890038 |
| chr18 | 747919   | 756835   |
| chr18 | 74877196 | 74890038 |
| chr18 | 74877196 | 74920692 |
| chr18 | 76370527 | 76371571 |
| chr18 | 76370527 | 76443211 |
| chr18 | 76371466 | 76380303 |
| chr18 | 76378854 | 76463141 |
| chr18 | 76849525 | 76851939 |
| chr18 | 76849525 | 76868863 |
| chr18 | 76849525 | 76871825 |
| chr18 | 76849525 | 76875664 |
| chr18 | 76849525 | 76880316 |
| chr18 | 76849525 | 76881512 |
| chr18 | 76868684 | 76881512 |
| chr18 | 76927036 | 76960855 |
| chr18 | 76937155 | 76960855 |
| chr18 | 76947520 | 76960855 |
| chr18 | 7774148  | 7888377  |
| chr18 | 7774148  | 7955414  |
| chr18 | 7888105  | 7906583  |
| chr18 | 7888105  | 7926683  |
| chr18 | 79096475 | 79126375 |
| chr18 | 79096475 | 79154555 |
| chr18 | 79096475 | 79176907 |

|       |          |          |
|-------|----------|----------|
| chr18 | 79096475 | 79207012 |
| chr18 | 79096475 | 79214038 |
| chr18 | 79096475 | 79253541 |
| chr18 | 79096475 | 79277196 |
| chr18 | 79110354 | 79126375 |
| chr18 | 79110354 | 79154555 |
| chr18 | 79113240 | 79154555 |
| chr18 | 79126266 | 79154555 |
| chr18 | 79126266 | 79176907 |
| chr18 | 79126266 | 79193263 |
| chr18 | 79126266 | 79207012 |
| chr18 | 79126266 | 79214038 |
| chr18 | 79126266 | 79253541 |
| chr18 | 79126266 | 79277196 |
| chr18 | 79126266 | 79307234 |
| chr18 | 79143801 | 79176907 |
| chr18 | 79143801 | 79253541 |
| chr18 | 79154503 | 79193263 |
| chr18 | 79154503 | 79214038 |
| chr18 | 79193182 | 79214038 |
| chr18 | 79206936 | 79277196 |
| chr18 | 7926567  | 7955414  |
| chr18 | 79303603 | 79307234 |
| chr18 | 79410402 | 79433738 |
| chr18 | 79433578 | 79467582 |
| chr18 | 79448781 | 79451816 |
| chr18 | 79695224 | 79697988 |
| chr18 | 79695224 | 79704917 |
| chr18 | 79710345 | 79729069 |
| chr18 | 79710345 | 79736521 |
| chr18 | 79728906 | 79736521 |
| chr18 | 8069685  | 8076564  |
| chr18 | 8076454  | 8088851  |
| chr18 | 8076454  | 8114827  |
| chr18 | 8076454  | 8143779  |
| chr18 | 8076454  | 8247919  |
| chr18 | 8085670  | 8088851  |
| chr18 | 8113485  | 8114827  |
| chr18 | 8244057  | 8253414  |
| chr18 | 8624937  | 8633327  |
| chr18 | 8635532  | 8636357  |
| chr18 | 8718423  | 8720496  |
| chr18 | 8777832  | 8798291  |
| chr18 | 8777832  | 8807060  |
| chr18 | 8783529  | 8786091  |

|       |          |          |
|-------|----------|----------|
| chr18 | 8796231  | 8798291  |
| chr18 | 9117837  | 9124983  |
| chr18 | 9117837  | 9126907  |
| chr18 | 9182381  | 9208803  |
| chr18 | 9182381  | 9211784  |
| chr18 | 9182381  | 9221999  |
| chr18 | 9195550  | 9204544  |
| chr18 | 9195550  | 9211784  |
| chr18 | 9204475  | 9211784  |
| chr18 | 9208656  | 9221999  |
| chr18 | 9211583  | 9221999  |
| chr18 | 9524593  | 9525851  |
| chr18 | 9524593  | 9530941  |
| chr18 | 9570156  | 9577191  |
| chr18 | 9570156  | 9595102  |
| chr18 | 9577063  | 9584828  |
| chr18 | 9577063  | 9595102  |
| chr18 | 9577063  | 9595153  |
| chr18 | 9583116  | 9584828  |
| chr18 | 9583116  | 9593874  |
| chr18 | 9583116  | 9595102  |
| chr18 | 9583116  | 9595153  |
| chr18 | 9584514  | 9588853  |
| chr18 | 9584514  | 9595102  |
| chr18 | 9588088  | 9588853  |
| chr18 | 9588088  | 9595102  |
| chr18 | 9588088  | 9595153  |
| chr18 | 9593767  | 9595102  |
| chr18 | 9593767  | 9595153  |
| chr18 | 9775277  | 9815222  |
| chr18 | 9931809  | 9937066  |
| chr18 | 9931809  | 9950568  |
| chr18 | 9936109  | 9945058  |
| chr18 | 9936109  | 9950568  |
| chr18 | 9944923  | 9950568  |
| chr19 | 1003129  | 1005553  |
| chr19 | 1011740  | 1012188  |
| chr19 | 10143765 | 10149968 |
| chr19 | 10151397 | 10155056 |
| chr19 | 10151749 | 10160063 |
| chr19 | 10154292 | 10155056 |
| chr19 | 10154292 | 10155945 |
| chr19 | 10154292 | 10166685 |
| chr19 | 10154904 | 10160063 |
| chr19 | 10159657 | 10160418 |

|       |          |          |
|-------|----------|----------|
| chr19 | 10162666 | 10166685 |
| chr19 | 10163325 | 10173905 |
| chr19 | 10163325 | 10175618 |
| chr19 | 10163325 | 10177367 |
| chr19 | 10168329 | 10177367 |
| chr19 | 10168329 | 10182077 |
| chr19 | 10173089 | 10177367 |
| chr19 | 10173089 | 10182077 |
| chr19 | 10173870 | 10177367 |
| chr19 | 10180349 | 10182077 |
| chr19 | 10258221 | 10258685 |
| chr19 | 1031070  | 1032696  |
| chr19 | 1031070  | 1036562  |
| chr19 | 1032391  | 1032696  |
| chr19 | 10328641 | 10330526 |
| chr19 | 1036129  | 1036562  |
| chr19 | 10368054 | 10368418 |
| chr19 | 10446217 | 10449150 |
| chr19 | 10446217 | 10450941 |
| chr19 | 10448916 | 10463975 |
| chr19 | 10461003 | 10461999 |
| chr19 | 10489191 | 10489853 |
| chr19 | 10546838 | 10547253 |
| chr19 | 10551896 | 10552324 |
| chr19 | 10557551 | 10558239 |
| chr19 | 10574416 | 10575029 |
| chr19 | 10677162 | 10681329 |
| chr19 | 10683635 | 10683970 |
| chr19 | 10759737 | 10777216 |
| chr19 | 10759737 | 10786706 |
| chr19 | 10772478 | 10777216 |
| chr19 | 10772478 | 10786706 |
| chr19 | 10805915 | 10830378 |
| chr19 | 10812263 | 10830378 |
| chr19 | 10904950 | 10909207 |
| chr19 | 10913876 | 10916777 |
| chr19 | 10923271 | 10923999 |
| chr19 | 10984120 | 10987924 |
| chr19 | 11003028 | 11003397 |
| chr19 | 11007901 | 11010531 |
| chr19 | 11030729 | 11041560 |
| chr19 | 11033289 | 11041560 |
| chr19 | 11059752 | 11060187 |
| chr19 | 11106564 | 11116212 |
| chr19 | 11110651 | 11111639 |

|       |          |          |
|-------|----------|----------|
| chr19 | 11111513 | 11116212 |
| chr19 | 11113277 | 11113762 |
| chr19 | 11116093 | 11116998 |
| chr19 | 11116093 | 11129670 |
| chr19 | 11120091 | 11120522 |
| chr19 | 11120091 | 11123344 |
| chr19 | 11120091 | 11128085 |
| chr19 | 1116020  | 1127765  |
| chr19 | 11178344 | 11178720 |
| chr19 | 1119515  | 1120023  |
| chr19 | 11214274 | 11217391 |
| chr19 | 11214274 | 11252550 |
| chr19 | 11216913 | 11217391 |
| chr19 | 11245562 | 11245878 |
| chr19 | 11335446 | 11335783 |
| chr19 | 11397243 | 11397597 |
| chr19 | 11405146 | 11417059 |
| chr19 | 11415936 | 11417059 |
| chr19 | 11448913 | 11449428 |
| chr19 | 1147308  | 1154402  |
| chr19 | 1149368  | 1154402  |
| chr19 | 11495949 | 11498339 |
| chr19 | 11507456 | 11519193 |
| chr19 | 11513055 | 11514221 |
| chr19 | 11724193 | 11725327 |
| chr19 | 12017875 | 12018301 |
| chr19 | 12046367 | 12046760 |
| chr19 | 1218416  | 1219413  |
| chr19 | 1218416  | 1223172  |
| chr19 | 1254166  | 1255694  |
| chr19 | 12623699 | 12624710 |
| chr19 | 12649135 | 12650222 |
| chr19 | 12658062 | 12658510 |
| chr19 | 12663316 | 12663835 |
| chr19 | 12672846 | 12673316 |
| chr19 | 12679456 | 12680325 |
| chr19 | 12702822 | 12703801 |
| chr19 | 1270927  | 1272051  |
| chr19 | 12710620 | 12711613 |
| chr19 | 1271328  | 1272051  |
| chr19 | 12714820 | 12715739 |
| chr19 | 12745376 | 12745759 |
| chr19 | 12764813 | 12766240 |
| chr19 | 12769880 | 12771477 |
| chr19 | 12810070 | 12810404 |



|       |          |          |
|-------|----------|----------|
| chr19 | 12851933 | 12852395 |
| chr19 | 12851933 | 12858739 |
| chr19 | 12878381 | 12878834 |
| chr19 | 12928341 | 12928847 |
| chr19 | 12928341 | 12930749 |
| chr19 | 12939133 | 12940147 |
| chr19 | 12939427 | 12940147 |
| chr19 | 12947847 | 12948358 |
| chr19 | 12947847 | 12949408 |
| chr19 | 13073046 | 13075671 |
| chr19 | 13073046 | 13081855 |
| chr19 | 13078612 | 13081855 |
| chr19 | 13135199 | 13136405 |
| chr19 | 1357008  | 1361032  |
| chr19 | 13817215 | 13819492 |
| chr19 | 13909822 | 13912593 |
| chr19 | 13912322 | 13912593 |
| chr19 | 13912322 | 13913638 |
| chr19 | 13913167 | 13913638 |
| chr19 | 13923332 | 13923811 |
| chr19 | 13927892 | 13928188 |
| chr19 | 13955911 | 13956522 |
| chr19 | 1398915  | 1399587  |
| chr19 | 14039507 | 14039910 |
| chr19 | 14042452 | 14042789 |
| chr19 | 14046153 | 14046618 |
| chr19 | 14097360 | 14100908 |
| chr19 | 1417499  | 1422396  |
| chr19 | 1417499  | 1428995  |
| chr19 | 1418665  | 1422396  |
| chr19 | 14390923 | 14398139 |
| chr19 | 14401385 | 14404562 |
| chr19 | 14402596 | 14404562 |
| chr19 | 14458030 | 14458375 |
| chr19 | 14479411 | 14480778 |
| chr19 | 14479411 | 14492912 |
| chr19 | 14563981 | 14564858 |
| chr19 | 1510149  | 1511160  |
| chr19 | 15268904 | 15273133 |
| chr19 | 1584539  | 1585214  |
| chr19 | 16081912 | 16086540 |
| chr19 | 16081912 | 16089120 |
| chr19 | 16081912 | 16093753 |
| chr19 | 1625575  | 1632405  |
| chr19 | 1627358  | 1632405  |

|       |          |          |
|-------|----------|----------|
| chr19 | 1632037  | 1632405  |
| chr19 | 16361778 | 16395467 |
| chr19 | 16425082 | 16428761 |
| chr19 | 16503064 | 16509988 |
| chr19 | 16679983 | 16680581 |
| chr19 | 16679983 | 16682508 |
| chr19 | 16841767 | 16854261 |
| chr19 | 16862351 | 16866556 |
| chr19 | 16863679 | 16866556 |
| chr19 | 17058548 | 17062779 |
| chr19 | 17152643 | 17154415 |
| chr19 | 17153966 | 17157038 |
| chr19 | 17153966 | 17168064 |
| chr19 | 17156908 | 17159484 |
| chr19 | 17156908 | 17163122 |
| chr19 | 17159394 | 17168064 |
| chr19 | 17172335 | 17172963 |
| chr19 | 17200292 | 17200829 |
| chr19 | 17209585 | 17211774 |
| chr19 | 17276494 | 17276909 |
| chr19 | 17559310 | 17560465 |
| chr19 | 17559310 | 17572602 |
| chr19 | 17720935 | 17725189 |
| chr19 | 17973807 | 17989843 |
| chr19 | 18134578 | 18134982 |
| chr19 | 1816224  | 1816569  |
| chr19 | 18162966 | 18163388 |
| chr19 | 1816697  | 1817329  |
| chr19 | 18175039 | 18175697 |
| chr19 | 18537600 | 18538433 |
| chr19 | 18537600 | 18538436 |
| chr19 | 18539370 | 18539720 |
| chr19 | 18573292 | 18573748 |
| chr19 | 18742909 | 18749875 |
| chr19 | 18759550 | 18760228 |
| chr19 | 18845979 | 18850242 |
| chr19 | 18845979 | 18852296 |
| chr19 | 18855924 | 18864251 |
| chr19 | 18863437 | 18864251 |
| chr19 | 18878929 | 18893575 |
| chr19 | 18910970 | 18913046 |
| chr19 | 18924232 | 18924979 |
| chr19 | 18931324 | 18933045 |
| chr19 | 18931324 | 18939049 |
| chr19 | 18934302 | 18939049 |

|       |          |          |
|-------|----------|----------|
| chr19 | 18938352 | 18939049 |
| chr19 | 19001612 | 19008428 |
| chr19 | 19001612 | 19031082 |
| chr19 | 19008316 | 19010342 |
| chr19 | 19024618 | 19031082 |
| chr19 | 19104912 | 19106385 |
| chr19 | 19120764 | 19121166 |
| chr19 | 19132351 | 19133210 |
| chr19 | 19196965 | 19199234 |
| chr19 | 19198106 | 19199234 |
| chr19 | 19296988 | 19306076 |
| chr19 | 19335717 | 19349436 |
| chr19 | 19337169 | 19343940 |
| chr19 | 19340845 | 19341407 |
| chr19 | 19492305 | 19492712 |
| chr19 | 19492305 | 19494383 |
| chr19 | 19535336 | 19535679 |
| chr19 | 19564932 | 19569584 |
| chr19 | 19564932 | 19570833 |
| chr19 | 19640084 | 19640571 |
| chr19 | 19645873 | 19646347 |
| chr19 | 19645873 | 19647528 |
| chr19 | 19878480 | 19880146 |
| chr19 | 21033455 | 21034184 |
| chr19 | 21309245 | 21310627 |
| chr19 | 2180712  | 2194577  |
| chr19 | 2185854  | 2193783  |
| chr19 | 2185854  | 2194577  |
| chr19 | 2189731  | 2193783  |
| chr19 | 2189731  | 2194577  |
| chr19 | 2213538  | 2214596  |
| chr19 | 23373741 | 23374764 |
| chr19 | 23662113 | 23663158 |
| chr19 | 24105939 | 24106643 |
| chr19 | 2438162  | 2438531  |
| chr19 | 2762505  | 2769091  |
| chr19 | 2936523  | 2939407  |
| chr19 | 29971192 | 29986417 |
| chr19 | 29971192 | 30005708 |
| chr19 | 29971192 | 30012531 |
| chr19 | 29985222 | 29986417 |
| chr19 | 30007469 | 30012531 |
| chr19 | 30009004 | 30012531 |
| chr19 | 3008868  | 3015760  |
| chr19 | 3011021  | 3015760  |

|       |          |          |
|-------|----------|----------|
| chr19 | 3110148  | 3115072  |
| chr19 | 311844   | 313643   |
| chr19 | 3192469  | 3196277  |
| chr19 | 3192469  | 3198897  |
| chr19 | 3192469  | 3201626  |
| chr19 | 3193283  | 3201626  |
| chr19 | 32356615 | 32360618 |
| chr19 | 32408216 | 32411372 |
| chr19 | 32432715 | 32437339 |
| chr19 | 32432715 | 32439910 |
| chr19 | 32436445 | 32455040 |
| chr19 | 325634   | 327989   |
| chr19 | 325634   | 336173   |
| chr19 | 32605834 | 32607832 |
| chr19 | 32615657 | 32622619 |
| chr19 | 32615657 | 32625966 |
| chr19 | 32615657 | 32626827 |
| chr19 | 32615657 | 32643631 |
| chr19 | 32617588 | 32622619 |
| chr19 | 32617588 | 32625966 |
| chr19 | 32617588 | 32643631 |
| chr19 | 32622421 | 32625966 |
| chr19 | 32622421 | 32626827 |
| chr19 | 32625873 | 32626827 |
| chr19 | 32625873 | 32628165 |
| chr19 | 32625873 | 32628849 |
| chr19 | 32625873 | 32643631 |
| chr19 | 32631401 | 32640385 |
| chr19 | 32631401 | 32642145 |
| chr19 | 32631401 | 32643352 |
| chr19 | 32631401 | 32644479 |
| chr19 | 32639355 | 32642145 |
| chr19 | 32639355 | 32643631 |
| chr19 | 32639355 | 32649792 |
| chr19 | 32643122 | 32643631 |
| chr19 | 32643122 | 32646615 |
| chr19 | 32644324 | 32659045 |
| chr19 | 32881843 | 32887841 |
| chr19 | 32899856 | 32901412 |
| chr19 | 32899856 | 32915517 |
| chr19 | 32899856 | 32918339 |
| chr19 | 32901244 | 32915517 |
| chr19 | 32901244 | 32931571 |
| chr19 | 32915336 | 32918339 |
| chr19 | 32915336 | 32926273 |

|       |          |          |
|-------|----------|----------|
| chr19 | 32915336 | 32933669 |
| chr19 | 32915336 | 32948368 |
| chr19 | 32931428 | 32933669 |
| chr19 | 32931428 | 32939885 |
| chr19 | 32931428 | 32960058 |
| chr19 | 32948265 | 32953801 |
| chr19 | 32973183 | 32973562 |
| chr19 | 32990513 | 32991969 |
| chr19 | 32996025 | 32999705 |
| chr19 | 32996025 | 33003000 |
| chr19 | 33002246 | 33003000 |
| chr19 | 33008013 | 33012724 |
| chr19 | 33008013 | 33021646 |
| chr19 | 33011678 | 33012724 |
| chr19 | 33011678 | 33026632 |
| chr19 | 33088133 | 33101574 |
| chr19 | 33093358 | 33094269 |
| chr19 | 33109716 | 33111902 |
| chr19 | 33112485 | 33119117 |
| chr19 | 33113766 | 33114419 |
| chr19 | 33125104 | 33126733 |
| chr19 | 334399   | 336173   |
| chr19 | 33462994 | 33501001 |
| chr19 | 33511027 | 33512776 |
| chr19 | 33667766 | 33689391 |
| chr19 | 33798667 | 33801342 |
| chr19 | 33798667 | 33807007 |
| chr19 | 33798667 | 33811552 |
| chr19 | 33798670 | 33801342 |
| chr19 | 33798670 | 33807007 |
| chr19 | 33798670 | 33811552 |
| chr19 | 34194477 | 34196763 |
| chr19 | 34194477 | 34209051 |
| chr19 | 34194477 | 34215661 |
| chr19 | 34196633 | 34215661 |
| chr19 | 34208928 | 34219877 |
| chr19 | 34215123 | 34215661 |
| chr19 | 3425105  | 3435207  |
| chr19 | 3425105  | 3449139  |
| chr19 | 3425105  | 3452666  |
| chr19 | 34327420 | 34330347 |
| chr19 | 3433517  | 3449139  |
| chr19 | 34377502 | 34377881 |
| chr19 | 34396300 | 34396657 |
| chr19 | 34409160 | 34421667 |

|       |          |          |
|-------|----------|----------|
| chr19 | 34430575 | 34433412 |
| chr19 | 34430575 | 34434968 |
| chr19 | 34430575 | 34438766 |
| chr19 | 34430575 | 34445121 |
| chr19 | 34430575 | 34464131 |
| chr19 | 34430575 | 34467014 |
| chr19 | 34431860 | 34434968 |
| chr19 | 34431860 | 34438766 |
| chr19 | 34431860 | 34443911 |
| chr19 | 34431860 | 34464131 |
| chr19 | 34431860 | 34467014 |
| chr19 | 34433347 | 34438766 |
| chr19 | 34433347 | 34445121 |
| chr19 | 34433347 | 34464131 |
| chr19 | 34433347 | 34467014 |
| chr19 | 34434867 | 34443911 |
| chr19 | 34438644 | 34445121 |
| chr19 | 34443843 | 34445121 |
| chr19 | 34443843 | 34467014 |
| chr19 | 34444999 | 34464131 |
| chr19 | 34450264 | 34460566 |
| chr19 | 34450264 | 34464131 |
| chr19 | 34450264 | 34467014 |
| chr19 | 34451980 | 34464131 |
| chr19 | 34454259 | 34464131 |
| chr19 | 34458768 | 34467014 |
| chr19 | 34464025 | 34467014 |
| chr19 | 3449013  | 3452666  |
| chr19 | 34490375 | 34495771 |
| chr19 | 34493036 | 34494637 |
| chr19 | 34678736 | 34683238 |
| chr19 | 34929883 | 34933723 |
| chr19 | 35009118 | 35013691 |
| chr19 | 35258944 | 35262692 |
| chr19 | 35498873 | 35502886 |
| chr19 | 35499957 | 35510252 |
| chr19 | 35615041 | 35615386 |
| chr19 | 35631139 | 35634373 |
| chr19 | 35729158 | 35730462 |
| chr19 | 3573291  | 3578113  |
| chr19 | 35754016 | 35754319 |
| chr19 | 35762018 | 35762356 |
| chr19 | 35764853 | 35765176 |
| chr19 | 36065957 | 36068010 |
| chr19 | 36065957 | 36071716 |

|       |          |          |
|-------|----------|----------|
| chr19 | 36067305 | 36090520 |
| chr19 | 36089037 | 36089306 |
| chr19 | 36092688 | 36094164 |
| chr19 | 36094030 | 36099617 |
| chr19 | 36120709 | 36125523 |
| chr19 | 36142651 | 36149636 |
| chr19 | 36145805 | 36146312 |
| chr19 | 36194232 | 36202050 |
| chr19 | 36472910 | 36473458 |
| chr19 | 3651825  | 3656557  |
| chr19 | 3651825  | 3667353  |
| chr19 | 3656404  | 3662001  |
| chr19 | 3660965  | 3662001  |
| chr19 | 3660965  | 3667353  |
| chr19 | 36712385 | 36712867 |
| chr19 | 36762304 | 36762675 |
| chr19 | 36823284 | 36825692 |
| chr19 | 36917578 | 36937242 |
| chr19 | 37080344 | 37091121 |
| chr19 | 37089038 | 37091121 |
| chr19 | 37155864 | 37156355 |
| chr19 | 37165594 | 37170054 |
| chr19 | 37347189 | 37347872 |
| chr19 | 37425867 | 37426378 |
| chr19 | 37425867 | 37444964 |
| chr19 | 37644609 | 37647899 |
| chr19 | 37707913 | 37711692 |
| chr19 | 37770004 | 37773751 |
| chr19 | 38081255 | 38130772 |
| chr19 | 38099961 | 38119882 |
| chr19 | 38106536 | 38119882 |
| chr19 | 38110226 | 38119882 |
| chr19 | 38119305 | 38130772 |
| chr19 | 38130497 | 38142710 |
| chr19 | 38141183 | 38142710 |
| chr19 | 38141183 | 38152967 |
| chr19 | 38152839 | 38164906 |
| chr19 | 38162252 | 38164906 |
| chr19 | 38192144 | 38193780 |
| chr19 | 38216139 | 38217876 |
| chr19 | 38307596 | 38309328 |
| chr19 | 38404907 | 38407077 |
| chr19 | 38700599 | 38701121 |
| chr19 | 38905014 | 38907659 |
| chr19 | 38917723 | 38918813 |

|       |          |          |
|-------|----------|----------|
| chr19 | 39354005 | 39357089 |
| chr19 | 39417554 | 39418105 |
| chr19 | 39417554 | 39419003 |
| chr19 | 3981338  | 3982424  |
| chr19 | 3981946  | 3983291  |
| chr19 | 39840232 | 39840515 |
| chr19 | 39840232 | 39840787 |
| chr19 | 39879554 | 39899697 |
| chr19 | 39883304 | 39896143 |
| chr19 | 39889478 | 39902837 |
| chr19 | 39979816 | 39980717 |
| chr19 | 40047374 | 40050377 |
| chr19 | 40081818 | 40084798 |
| chr19 | 40237968 | 40240110 |
| chr19 | 40255157 | 40257054 |
| chr19 | 40255157 | 40265351 |
| chr19 | 40333850 | 40336407 |
| chr19 | 40458154 | 40458545 |
| chr19 | 40582350 | 40583717 |
| chr19 | 40583397 | 40583717 |
| chr19 | 40616888 | 40619493 |
| chr19 | 40617099 | 40622667 |
| chr19 | 40623603 | 40624082 |
| chr19 | 40703540 | 40714635 |
| chr19 | 40705095 | 40705447 |
| chr19 | 40710058 | 40714635 |
| chr19 | 40725339 | 40733364 |
| chr19 | 40736985 | 40737769 |
| chr19 | 40757331 | 40759610 |
| chr19 | 40783920 | 40786978 |
| chr19 | 40786664 | 40786978 |
| chr19 | 4110508  | 4117629  |
| chr19 | 41220635 | 41253708 |
| chr19 | 41230966 | 41231298 |
| chr19 | 41243615 | 41248820 |
| chr19 | 41243615 | 41256611 |
| chr19 | 41248513 | 41248820 |
| chr19 | 41252350 | 41256611 |
| chr19 | 41268222 | 41276298 |
| chr19 | 41268222 | 41279176 |
| chr19 | 41268222 | 41281275 |
| chr19 | 41276158 | 41281275 |
| chr19 | 41332127 | 41348455 |
| chr19 | 41341882 | 41342247 |
| chr19 | 41378280 | 41382921 |



|       |          |          |
|-------|----------|----------|
| chr19 | 41410636 | 41419296 |
| chr19 | 41422163 | 41423169 |
| chr19 | 41869030 | 41869753 |
| chr19 | 418922   | 425231   |
| chr19 | 42117249 | 42122576 |
| chr19 | 42232056 | 42236941 |
| chr19 | 42232056 | 42240142 |
| chr19 | 42236605 | 42240142 |
| chr19 | 42286770 | 42294735 |
| chr19 | 42335034 | 42335385 |
| chr19 | 430683   | 440932   |
| chr19 | 43497117 | 43497876 |
| chr19 | 4354948  | 4355173  |
| chr19 | 43652224 | 43655573 |
| chr19 | 43652224 | 43656640 |
| chr19 | 4365481  | 4366994  |
| chr19 | 43655438 | 43656640 |
| chr19 | 43656478 | 43665459 |
| chr19 | 43732857 | 43733733 |
| chr19 | 43737596 | 43740218 |
| chr19 | 43744771 | 43748052 |
| chr19 | 43747441 | 43750747 |
| chr19 | 43831317 | 43835592 |
| chr19 | 43918869 | 43925458 |
| chr19 | 43922170 | 43934694 |
| chr19 | 43924237 | 43925458 |
| chr19 | 43925324 | 43934694 |
| chr19 | 43988458 | 43991934 |
| chr19 | 4405911  | 4409759  |
| chr19 | 4405911  | 4418076  |
| chr19 | 44076321 | 44082105 |
| chr19 | 44144556 | 44150505 |
| chr19 | 44165756 | 44172952 |
| chr19 | 4422565  | 4433539  |
| chr19 | 44228445 | 44229816 |
| chr19 | 4430548  | 4432207  |
| chr19 | 4452363  | 4454093  |
| chr19 | 4475274  | 4475583  |
| chr19 | 4475274  | 4491682  |
| chr19 | 4475274  | 4501317  |
| chr19 | 44756231 | 44758841 |
| chr19 | 44865270 | 44874478 |
| chr19 | 44900729 | 44901310 |
| chr19 | 45022052 | 45025737 |
| chr19 | 45022052 | 45028992 |

|       |          |          |
|-------|----------|----------|
| chr19 | 45025328 | 45025737 |
| chr19 | 45025328 | 45028992 |
| chr19 | 45025328 | 45034528 |
| chr19 | 45138513 | 45146049 |
| chr19 | 45138513 | 45146480 |
| chr19 | 45258988 | 45263367 |
| chr19 | 45258988 | 45271708 |
| chr19 | 45258988 | 45278615 |
| chr19 | 45258988 | 45287664 |
| chr19 | 45263112 | 45266281 |
| chr19 | 45277922 | 45278615 |
| chr19 | 45277922 | 45280734 |
| chr19 | 45280373 | 45280734 |
| chr19 | 45287446 | 45294452 |
| chr19 | 45355664 | 45357699 |
| chr19 | 45357269 | 45361642 |
| chr19 | 45363742 | 45370232 |
| chr19 | 45364423 | 45364954 |
| chr19 | 45368629 | 45369147 |
| chr19 | 45398004 | 45398339 |
| chr19 | 45413676 | 45416897 |
| chr19 | 45413676 | 45423381 |
| chr19 | 45416820 | 45421393 |
| chr19 | 45419097 | 45421393 |
| chr19 | 45517662 | 45518094 |
| chr19 | 45521321 | 45522818 |
| chr19 | 45522167 | 45522818 |
| chr19 | 45613540 | 45614700 |
| chr19 | 45626704 | 45630046 |
| chr19 | 45821383 | 45823875 |
| chr19 | 45831383 | 45835228 |
| chr19 | 45842249 | 45844200 |
| chr19 | 45852311 | 45854507 |
| chr19 | 45854174 | 45854507 |
| chr19 | 46375603 | 46376574 |
| chr19 | 46605826 | 46608588 |
| chr19 | 46652659 | 46653075 |
| chr19 | 46693874 | 46714001 |
| chr19 | 46724806 | 46725648 |
| chr19 | 46727451 | 46733236 |
| chr19 | 46733038 | 46738888 |
| chr19 | 46748026 | 46748717 |
| chr19 | 46776974 | 46784559 |
| chr19 | 47040443 | 47042904 |
| chr19 | 47081512 | 47082295 |

|       |          |          |
|-------|----------|----------|
| chr19 | 47081512 | 47094608 |
| chr19 | 47143493 | 47155213 |
| chr19 | 47143493 | 47169923 |
| chr19 | 47150201 | 47155213 |
| chr19 | 47150201 | 47169923 |
| chr19 | 47152897 | 47155213 |
| chr19 | 47264602 | 47264946 |
| chr19 | 47352753 | 47355350 |
| chr19 | 47352753 | 47362693 |
| chr19 | 47357865 | 47362693 |
| chr19 | 47406459 | 47409547 |
| chr19 | 47416651 | 47417350 |
| chr19 | 47489710 | 47495596 |
| chr19 | 47500632 | 47503502 |
| chr19 | 47670442 | 47675916 |
| chr19 | 47718508 | 47726224 |
| chr19 | 47725811 | 47736533 |
| chr19 | 47746966 | 47752607 |
| chr19 | 48127276 | 48128020 |
| chr19 | 48149762 | 48150210 |
| chr19 | 48149762 | 48157140 |
| chr19 | 48218870 | 48221855 |
| chr19 | 48221729 | 48241063 |
| chr19 | 48230437 | 48241063 |
| chr19 | 48231659 | 48234543 |
| chr19 | 48389552 | 48390524 |
| chr19 | 48446384 | 48446843 |
| chr19 | 4859589  | 4860024  |
| chr19 | 48627974 | 48628277 |
| chr19 | 48853681 | 48854264 |
| chr19 | 48913010 | 48913564 |
| chr19 | 48970545 | 48971023 |
| chr19 | 48981529 | 48982837 |
| chr19 | 49004276 | 49007368 |
| chr19 | 49004276 | 49011310 |
| chr19 | 49007017 | 49007368 |
| chr19 | 49090290 | 49098704 |
| chr19 | 49127858 | 49130599 |
| chr19 | 49342437 | 49359499 |
| chr19 | 49342437 | 49360081 |
| chr19 | 49355147 | 49359499 |
| chr19 | 4941527  | 4941931  |
| chr19 | 4944131  | 4944450  |
| chr19 | 4944131  | 4947211  |
| chr19 | 49449474 | 49450848 |

|       |          |          |
|-------|----------|----------|
| chr19 | 49458485 | 49459848 |
| chr19 | 4947104  | 4950996  |
| chr19 | 49478908 | 49480620 |
| chr19 | 4950610  | 4950996  |
| chr19 | 49614532 | 49616219 |
| chr19 | 49621524 | 49625200 |
| chr19 | 49645020 | 49657889 |
| chr19 | 49679871 | 49680588 |
| chr19 | 49781756 | 49782724 |
| chr19 | 49854405 | 49860336 |
| chr19 | 5016256  | 5033031  |
| chr19 | 5016256  | 5041251  |
| chr19 | 5016256  | 5047669  |
| chr19 | 50217614 | 50224177 |
| chr19 | 50247003 | 50250688 |
| chr19 | 5032865  | 5041251  |
| chr19 | 5039835  | 5041251  |
| chr19 | 5039835  | 5047669  |
| chr19 | 50398847 | 50399484 |
| chr19 | 50398850 | 50399484 |
| chr19 | 50408784 | 50409666 |
| chr19 | 5047475  | 5082504  |
| chr19 | 5047475  | 5138070  |
| chr19 | 50686236 | 50702660 |
| chr19 | 5077366  | 5082504  |
| chr19 | 5131075  | 5144902  |
| chr19 | 51860903 | 51877377 |
| chr19 | 51860903 | 51880877 |
| chr19 | 51860903 | 51886912 |
| chr19 | 51877281 | 51880877 |
| chr19 | 51877281 | 51886912 |
| chr19 | 52001812 | 52002281 |
| chr19 | 52040487 | 52047060 |
| chr19 | 52076043 | 52077084 |
| chr19 | 52076043 | 52089002 |
| chr19 | 52160464 | 52169781 |
| chr19 | 52215778 | 52216663 |
| chr19 | 52220188 | 52225808 |
| chr19 | 52282110 | 52283413 |
| chr19 | 52314152 | 52315962 |
| chr19 | 52347706 | 52354379 |
| chr19 | 52353681 | 52354379 |
| chr19 | 52373110 | 52374427 |
| chr19 | 52532907 | 52547638 |
| chr19 | 52574076 | 52576021 |

|       |          |          |
|-------|----------|----------|
| chr19 | 52618935 | 52635153 |
| chr19 | 52655560 | 52660843 |
| chr19 | 52728729 | 52730005 |
| chr19 | 53074139 | 53075183 |
| chr19 | 53115703 | 53116433 |
| chr19 | 53148680 | 53153793 |
| chr19 | 535836   | 536340   |
| chr19 | 54142928 | 54144332 |
| chr19 | 54142928 | 54146657 |
| chr19 | 54142928 | 54149758 |
| chr19 | 54142928 | 54153840 |
| chr19 | 54143441 | 54144134 |
| chr19 | 55047386 | 55048763 |
| chr19 | 55098783 | 55099095 |
| chr19 | 55098783 | 55103568 |
| chr19 | 55098783 | 55112795 |
| chr19 | 55140882 | 55141302 |
| chr19 | 55140882 | 55141920 |
| chr19 | 55196521 | 55197416 |
| chr19 | 55245119 | 55245678 |
| chr19 | 55265277 | 55266286 |
| chr19 | 55294016 | 55294397 |
| chr19 | 55341793 | 55343997 |
| chr19 | 55341793 | 55346687 |
| chr19 | 55386349 | 55388048 |
| chr19 | 55659209 | 55663744 |
| chr19 | 55792300 | 55801739 |
| chr19 | 5592746  | 5600260  |
| chr19 | 5604582  | 5604936  |
| chr19 | 5604582  | 5616486  |
| chr19 | 56146246 | 56147208 |
| chr19 | 5616131  | 5616486  |
| chr19 | 56407025 | 56414440 |
| chr19 | 56413958 | 56414440 |
| chr19 | 5641593  | 5641946  |
| chr19 | 5641739  | 5651072  |
| chr19 | 5648988  | 5654456  |
| chr19 | 5650977  | 5657347  |
| chr19 | 5653114  | 5653420  |
| chr19 | 5653114  | 5654456  |
| chr19 | 5653114  | 5657347  |
| chr19 | 56547507 | 56550605 |
| chr19 | 5700788  | 5705992  |
| chr19 | 5711770  | 5713253  |
| chr19 | 5711770  | 5714271  |

|       |          |          |
|-------|----------|----------|
| chr19 | 5727267  | 5737205  |
| chr19 | 5727267  | 5739439  |
| chr19 | 5733855  | 5739439  |
| chr19 | 5751646  | 5768242  |
| chr19 | 57546456 | 57552722 |
| chr19 | 57925622 | 57933902 |
| chr19 | 57961390 | 57966632 |
| chr19 | 57988206 | 57988721 |
| chr19 | 57988206 | 57999896 |
| chr19 | 58061579 | 58063541 |
| chr19 | 58088687 | 58090386 |
| chr19 | 58392975 | 58393487 |
| chr19 | 5921200  | 5925737  |
| chr19 | 5927967  | 5941707  |
| chr19 | 5941620  | 5957973  |
| chr19 | 6004200  | 6008224  |
| chr19 | 6010135  | 6016271  |
| chr19 | 6026162  | 6040241  |
| chr19 | 613247   | 614016   |
| chr19 | 6217953  | 6227102  |
| chr19 | 6230569  | 6270759  |
| chr19 | 6262227  | 6270759  |
| chr19 | 6362445  | 6366363  |
| chr19 | 6364451  | 6366363  |
| chr19 | 6387388  | 6389637  |
| chr19 | 651610   | 652884   |
| chr19 | 6742966  | 6743836  |
| chr19 | 6749933  | 6750633  |
| chr19 | 6934986  | 6937648  |
| chr19 | 7122613  | 7132317  |
| chr19 | 7172289  | 7174731  |
| chr19 | 726137   | 727694   |
| chr19 | 726137   | 734194   |
| chr19 | 726137   | 736078   |
| chr19 | 7440343  | 7447168  |
| chr19 | 7444203  | 7447168  |
| chr19 | 7462151  | 7464690  |
| chr19 | 7462151  | 7470315  |
| chr19 | 7627242  | 7628298  |
| chr19 | 7938026  | 7941197  |
| chr19 | 7973724  | 7991831  |
| chr19 | 7981082  | 7991831  |
| chr19 | 803560   | 805187   |
| chr19 | 804291   | 804939   |
| chr19 | 805012   | 806556   |

|       |           |           |
|-------|-----------|-----------|
| chr19 | 8371055   | 8371522   |
| chr19 | 8455404   | 8463686   |
| chr19 | 8455404   | 8467584   |
| chr19 | 8455404   | 8471427   |
| chr19 | 8462528   | 8467584   |
| chr19 | 8462528   | 8471427   |
| chr19 | 8462528   | 8474244   |
| chr19 | 8589241   | 8589991   |
| chr19 | 879936    | 886201    |
| chr19 | 879936    | 890244    |
| chr19 | 879936    | 891149    |
| chr19 | 9337795   | 9339319   |
| chr19 | 9355656   | 9364948   |
| chr19 | 9364861   | 9371752   |
| chr19 | 9417827   | 9419299   |
| chr19 | 9530984   | 9533966   |
| chr19 | 9532844   | 9535279   |
| chr19 | 9535187   | 9536356   |
| chr19 | 9614020   | 9618179   |
| chr19 | 9656546   | 9659467   |
| chr19 | 9656546   | 9660821   |
| chr19 | 9656546   | 9660874   |
| chr19 | 966571    | 968503    |
| chr19 | 9828591   | 9828874   |
| chr19 | 991080    | 991351    |
| chr1  | 100007033 | 100015420 |
| chr1  | 100007033 | 100017815 |
| chr1  | 100011364 | 100015420 |
| chr1  | 100049908 | 100061949 |
| chr1  | 100049908 | 100068586 |
| chr1  | 100049908 | 100069685 |
| chr1  | 100058665 | 100068586 |
| chr1  | 10007569  | 10008274  |
| chr1  | 100102954 | 100110483 |
| chr1  | 100140181 | 100148326 |
| chr1  | 100377545 | 100390824 |
| chr1  | 100424221 | 100442996 |
| chr1  | 100424221 | 100462881 |
| chr1  | 100424221 | 100468094 |
| chr1  | 100439931 | 100462881 |
| chr1  | 100439931 | 100468094 |
| chr1  | 100455404 | 100484451 |
| chr1  | 100494817 | 100499262 |
| chr1  | 100906851 | 100913806 |
| chr1  | 100906851 | 100918127 |

|      |           |           |
|------|-----------|-----------|
| chr1 | 100906851 | 100921841 |
| chr1 | 100911062 | 100921841 |
| chr1 | 100912111 | 100921841 |
| chr1 | 100913662 | 100921841 |
| chr1 | 100913662 | 100974902 |
| chr1 | 10095460  | 10105744  |
| chr1 | 10095460  | 10122076  |
| chr1 | 100995109 | 101021765 |
| chr1 | 101001466 | 101025466 |
| chr1 | 10102947  | 10145039  |
| chr1 | 10119512  | 10130813  |
| chr1 | 10132368  | 10137205  |
| chr1 | 10134987  | 10137205  |
| chr1 | 10146962  | 10161286  |
| chr1 | 10149183  | 10151561  |
| chr1 | 10232249  | 10256323  |
| chr1 | 10232249  | 10261970  |
| chr1 | 10256246  | 10261970  |
| chr1 | 10256246  | 10268263  |
| chr1 | 10258492  | 10268263  |
| chr1 | 10261904  | 10291161  |
| chr1 | 10267379  | 10268263  |
| chr1 | 10271501  | 10275503  |
| chr1 | 10271501  | 10276399  |
| chr1 | 10275427  | 10278128  |
| chr1 | 10275427  | 10282533  |
| chr1 | 10276320  | 10291161  |
| chr1 | 10291081  | 10297246  |
| chr1 | 10320042  | 10343287  |
| chr1 | 10342049  | 10345953  |
| chr1 | 103527694 | 103551073 |
| chr1 | 10363282  | 10365648  |
| chr1 | 10371140  | 10375373  |
| chr1 | 10403070  | 10404279  |
| chr1 | 10403070  | 10413251  |
| chr1 | 10404160  | 10408140  |
| chr1 | 10408070  | 10417509  |
| chr1 | 10411417  | 10413251  |
| chr1 | 10433841  | 10442441  |
| chr1 | 10440346  | 10442441  |
| chr1 | 10467189  | 10469338  |
| chr1 | 108143542 | 108161293 |
| chr1 | 108148278 | 108161293 |
| chr1 | 108154982 | 108185954 |
| chr1 | 108181940 | 108185954 |



|      |           |           |
|------|-----------|-----------|
| chr1 | 108616381 | 108628804 |
| chr1 | 108624644 | 108629657 |
| chr1 | 108650210 | 108657579 |
| chr1 | 108650210 | 108659962 |
| chr1 | 108654715 | 108657579 |
| chr1 | 108654715 | 108659962 |
| chr1 | 108657450 | 108659962 |
| chr1 | 108782421 | 108794907 |
| chr1 | 108782421 | 108796726 |
| chr1 | 108793581 | 108796726 |
| chr1 | 108793581 | 108800305 |
| chr1 | 108796233 | 108798237 |
| chr1 | 108885274 | 108918789 |
| chr1 | 108896863 | 108904254 |
| chr1 | 108901789 | 108918789 |
| chr1 | 108939635 | 108944057 |
| chr1 | 108939635 | 108950448 |
| chr1 | 108943474 | 108943907 |
| chr1 | 108943474 | 108944057 |
| chr1 | 108943474 | 108950448 |
| chr1 | 108974535 | 109004718 |
| chr1 | 108982608 | 108986680 |
| chr1 | 108986522 | 109011718 |
| chr1 | 108991253 | 108995837 |
| chr1 | 108995579 | 109004715 |
| chr1 | 109223977 | 109231786 |
| chr1 | 109230877 | 109231786 |
| chr1 | 109262805 | 109265009 |
| chr1 | 109281107 | 109282575 |
| chr1 | 109336239 | 109342158 |
| chr1 | 109336239 | 109345878 |
| chr1 | 109336239 | 109369589 |
| chr1 | 109340723 | 109345881 |
| chr1 | 109340723 | 109347532 |
| chr1 | 109342013 | 109345878 |
| chr1 | 109342013 | 109345881 |
| chr1 | 109345750 | 109355469 |
| chr1 | 109347482 | 109355469 |
| chr1 | 109350928 | 109355469 |
| chr1 | 109354366 | 109355469 |
| chr1 | 109409927 | 109415363 |
| chr1 | 109411876 | 109415363 |
| chr1 | 109573736 | 109582565 |
| chr1 | 109573736 | 109586882 |
| chr1 | 109573895 | 109579361 |

|      |           |           |
|------|-----------|-----------|
| chr1 | 109579203 | 109582565 |
| chr1 | 109579203 | 109586882 |
| chr1 | 109582436 | 109586882 |
| chr1 | 110009033 | 110014857 |
| chr1 | 11016843  | 11018873  |
| chr1 | 11018732  | 11020599  |
| chr1 | 110222963 | 110226178 |
| chr1 | 11030175  | 11030882  |
| chr1 | 11068007  | 11076948  |
| chr1 | 11070899  | 11076948  |
| chr1 | 11073933  | 11076948  |
| chr1 | 11077364  | 11081238  |
| chr1 | 11121245  | 11122126  |
| chr1 | 11124497  | 11133197  |
| chr1 | 111456085 | 111459636 |
| chr1 | 11157151  | 11167517  |
| chr1 | 111627469 | 111697497 |
| chr1 | 111627469 | 111704486 |
| chr1 | 111627469 | 111709264 |
| chr1 | 111691333 | 111704486 |
| chr1 | 111691333 | 111709264 |
| chr1 | 111759399 | 111761284 |
| chr1 | 11199257  | 11199703  |
| chr1 | 11228667  | 11234265  |
| chr1 | 112412193 | 112416264 |
| chr1 | 11247624  | 11248094  |
| chr1 | 112555867 | 112616895 |
| chr1 | 112576985 | 112582472 |
| chr1 | 112576985 | 112584126 |
| chr1 | 112576985 | 112591603 |
| chr1 | 112576985 | 112598086 |
| chr1 | 112576985 | 112600848 |
| chr1 | 112576985 | 112616844 |
| chr1 | 112576985 | 112616895 |
| chr1 | 112581991 | 112584126 |
| chr1 | 112581991 | 112598086 |
| chr1 | 112581991 | 112600848 |
| chr1 | 112581991 | 112616895 |
| chr1 | 112591524 | 112598086 |
| chr1 | 112591524 | 112611003 |
| chr1 | 112591524 | 112616844 |
| chr1 | 112591524 | 112616895 |
| chr1 | 112597970 | 112616895 |
| chr1 | 112600793 | 112611003 |
| chr1 | 112610840 | 112616895 |

|      |           |           |
|------|-----------|-----------|
| chr1 | 112647209 | 112659779 |
| chr1 | 112653597 | 112654671 |
| chr1 | 112653597 | 112659779 |
| chr1 | 112653597 | 112667145 |
| chr1 | 112654464 | 112659779 |
| chr1 | 112654464 | 112669605 |
| chr1 | 112691664 | 112694172 |
| chr1 | 112692760 | 112694172 |
| chr1 | 112917177 | 112929352 |
| chr1 | 113091317 | 113094482 |
| chr1 | 113091317 | 113096365 |
| chr1 | 113091317 | 113100488 |
| chr1 | 113093205 | 113094755 |
| chr1 | 113549514 | 113585596 |
| chr1 | 113549514 | 113590658 |
| chr1 | 113549514 | 113622994 |
| chr1 | 113585386 | 113590658 |
| chr1 | 113671733 | 113673465 |
| chr1 | 113704080 | 113706722 |
| chr1 | 113704080 | 113724893 |
| chr1 | 113710253 | 113712113 |
| chr1 | 113710253 | 113724893 |
| chr1 | 113724758 | 113726574 |
| chr1 | 113724758 | 113738799 |
| chr1 | 113726417 | 113738799 |
| chr1 | 113738109 | 113738799 |
| chr1 | 113777209 | 113777808 |
| chr1 | 113829591 | 113834439 |
| chr1 | 113897839 | 113902862 |
| chr1 | 113901235 | 113901885 |
| chr1 | 113906995 | 113908191 |
| chr1 | 113952765 | 113954770 |
| chr1 | 114397939 | 114401463 |
| chr1 | 114399456 | 114407100 |
| chr1 | 114463103 | 114463556 |
| chr1 | 114463103 | 114464388 |
| chr1 | 114587386 | 114595873 |
| chr1 | 114608685 | 114622065 |
| chr1 | 114708530 | 114716177 |
| chr1 | 114709568 | 114713978 |
| chr1 | 114719578 | 114720717 |
| chr1 | 114719578 | 114724002 |
| chr1 | 114719578 | 114738072 |
| chr1 | 114723882 | 114732816 |
| chr1 | 114725220 | 114738072 |

|      |           |           |
|------|-----------|-----------|
| chr1 | 114733731 | 114738072 |
| chr1 | 114734441 | 114750207 |
| chr1 | 114739691 | 114741673 |
| chr1 | 115659640 | 115664268 |
| chr1 | 115992030 | 116037388 |
| chr1 | 116019581 | 116020885 |
| chr1 | 11671265  | 11672023  |
| chr1 | 11676847  | 11680613  |
| chr1 | 117084017 | 117091410 |
| chr1 | 117090054 | 117096299 |
| chr1 | 117402185 | 117405645 |
| chr1 | 117402185 | 117414831 |
| chr1 | 117402185 | 117420649 |
| chr1 | 117402185 | 117442325 |
| chr1 | 117402185 | 117466427 |
| chr1 | 117414712 | 117420649 |
| chr1 | 117414712 | 117442325 |
| chr1 | 117414712 | 117466427 |
| chr1 | 117442230 | 117466427 |
| chr1 | 117442230 | 117502970 |
| chr1 | 117460488 | 117466427 |
| chr1 | 117460488 | 117493262 |
| chr1 | 117460488 | 117502970 |
| chr1 | 117493146 | 117502970 |
| chr1 | 117878008 | 117899216 |
| chr1 | 117881822 | 117886653 |
| chr1 | 117881822 | 117920424 |
| chr1 | 117896832 | 117912683 |
| chr1 | 117896832 | 117920424 |
| chr1 | 117906505 | 117918736 |
| chr1 | 117911993 | 117918736 |
| chr1 | 117933287 | 117942544 |
| chr1 | 117951975 | 117953541 |
| chr1 | 119146952 | 119150746 |
| chr1 | 11947975  | 11972997  |
| chr1 | 119721169 | 119727102 |
| chr1 | 119734633 | 119737266 |
| chr1 | 11989164  | 11992690  |
| chr1 | 119948413 | 119955232 |
| chr1 | 119950723 | 119987082 |
| chr1 | 119953542 | 119963807 |
| chr1 | 119963573 | 119969744 |
| chr1 | 119963573 | 119997332 |
| chr1 | 119996996 | 120029987 |
| chr1 | 12001400  | 12002103  |

|      |           |           |
|------|-----------|-----------|
| chr1 | 12005710  | 12009726  |
| chr1 | 120163209 | 120168949 |
| chr1 | 1223243   | 1223968   |
| chr1 | 1223243   | 1228946   |
| chr1 | 12234190  | 12253826  |
| chr1 | 12253721  | 12257087  |
| chr1 | 12253721  | 12258103  |
| chr1 | 12268705  | 12271124  |
| chr1 | 12293523  | 12308641  |
| chr1 | 12299201  | 12308641  |
| chr1 | 12299201  | 12311925  |
| chr1 | 12299201  | 12333366  |
| chr1 | 12299201  | 12335827  |
| chr1 | 12329828  | 12341885  |
| chr1 | 12353973  | 12363247  |
| chr1 | 12400180  | 12403973  |
| chr1 | 12400180  | 12415221  |
| chr1 | 12400180  | 12416827  |
| chr1 | 1256044   | 1257310   |
| chr1 | 1256044   | 1267992   |
| chr1 | 1256991   | 1257310   |
| chr1 | 1256991   | 1267992   |
| chr1 | 12578717  | 12579412  |
| chr1 | 1319295   | 1321093   |
| chr1 | 1340246   | 1342758   |
| chr1 | 1390229   | 1395514   |
| chr1 | 144439828 | 144456805 |
| chr1 | 144456536 | 144459464 |
| chr1 | 145643868 | 145663424 |
| chr1 | 145747994 | 145784596 |
| chr1 | 145771710 | 145788966 |
| chr1 | 145825756 | 145827005 |
| chr1 | 145833259 | 145833582 |
| chr1 | 145839889 | 145841071 |
| chr1 | 145851019 | 145853664 |
| chr1 | 145853503 | 145854880 |
| chr1 | 146943290 | 146946607 |
| chr1 | 147252622 | 147256562 |
| chr1 | 147252622 | 147259918 |
| chr1 | 147252622 | 147264584 |
| chr1 | 147252622 | 147268878 |
| chr1 | 147252622 | 147276257 |
| chr1 | 147254869 | 147280191 |
| chr1 | 147255812 | 147268878 |
| chr1 | 147259836 | 147267518 |

|      |           |           |
|------|-----------|-----------|
| chr1 | 147275353 | 147285487 |
| chr1 | 147286297 | 147287733 |
| chr1 | 147648245 | 147659775 |
| chr1 | 1482137   | 1486668   |
| chr1 | 1485015   | 1487914   |
| chr1 | 1485015   | 1490671   |
| chr1 | 1489203   | 1490671   |
| chr1 | 148961836 | 148962640 |
| chr1 | 148977936 | 148978415 |
| chr1 | 148977936 | 148979849 |
| chr1 | 148977936 | 148981397 |
| chr1 | 149001590 | 149005437 |
| chr1 | 149655698 | 149661089 |
| chr1 | 149655698 | 149669310 |
| chr1 | 149947250 | 149950221 |
| chr1 | 149959683 | 149964349 |
| chr1 | 149959683 | 149965878 |
| chr1 | 149964221 | 149977576 |
| chr1 | 149965776 | 149971251 |
| chr1 | 150068609 | 150110627 |
| chr1 | 150081341 | 150110627 |
| chr1 | 150230570 | 150231926 |
| chr1 | 150324894 | 150325881 |
| chr1 | 150334934 | 150338326 |
| chr1 | 150334934 | 150340477 |
| chr1 | 150343308 | 150344547 |
| chr1 | 150417595 | 150446401 |
| chr1 | 150440922 | 150446401 |
| chr1 | 150444250 | 150446401 |
| chr1 | 150492410 | 150496908 |
| chr1 | 150492410 | 150497747 |
| chr1 | 150492410 | 150499293 |
| chr1 | 150497529 | 150499293 |
| chr1 | 150625641 | 150627592 |
| chr1 | 150661813 | 150663763 |
| chr1 | 150817919 | 150826617 |
| chr1 | 150823193 | 150826617 |
| chr1 | 150831817 | 150836493 |
| chr1 | 150834537 | 150836493 |
| chr1 | 150927703 | 150930118 |
| chr1 | 150927703 | 150941428 |
| chr1 | 150929966 | 150941428 |
| chr1 | 150941328 | 150945108 |
| chr1 | 150942562 | 150947012 |
| chr1 | 150949121 | 150949525 |

|      |           |           |
|------|-----------|-----------|
| chr1 | 150951364 | 150962719 |
| chr1 | 150960562 | 150962158 |
| chr1 | 150966475 | 150969091 |
| chr1 | 151017811 | 151027327 |
| chr1 | 151024610 | 151025673 |
| chr1 | 151024610 | 151027327 |
| chr1 | 151024610 | 151028944 |
| chr1 | 151025514 | 151027327 |
| chr1 | 151027232 | 151028944 |
| chr1 | 151088189 | 151098002 |
| chr1 | 151139424 | 151140090 |
| chr1 | 151166933 | 151167414 |
| chr1 | 151178000 | 151184493 |
| chr1 | 151185505 | 151185950 |
| chr1 | 151224244 | 151232365 |
| chr1 | 151224244 | 151234496 |
| chr1 | 151224244 | 151239178 |
| chr1 | 151224247 | 151232703 |
| chr1 | 151227319 | 151232703 |
| chr1 | 151231670 | 151232703 |
| chr1 | 151232247 | 151232703 |
| chr1 | 151239954 | 151242567 |
| chr1 | 151242122 | 151242567 |
| chr1 | 151262160 | 151264028 |
| chr1 | 151412295 | 151442205 |
| chr1 | 151423396 | 151442205 |
| chr1 | 151427822 | 151430841 |
| chr1 | 151427822 | 151442205 |
| chr1 | 151430665 | 151442205 |
| chr1 | 151440927 | 151442205 |
| chr1 | 151562090 | 151578826 |
| chr1 | 151562584 | 151566228 |
| chr1 | 151638887 | 151658427 |
| chr1 | 151638887 | 151662270 |
| chr1 | 151638887 | 151666011 |
| chr1 | 151638887 | 151668635 |
| chr1 | 151638887 | 151683445 |
| chr1 | 151638887 | 151693483 |
| chr1 | 151658234 | 151662270 |
| chr1 | 151658234 | 151666011 |
| chr1 | 151658234 | 151668635 |
| chr1 | 151658234 | 151683445 |
| chr1 | 151660797 | 151666011 |
| chr1 | 151762104 | 151763146 |
| chr1 | 1522743   | 1527862   |

|      |           |           |
|------|-----------|-----------|
| chr1 | 153626319 | 153632240 |
| chr1 | 153663214 | 153664474 |
| chr1 | 153663214 | 153665336 |
| chr1 | 153664042 | 153668557 |
| chr1 | 153665219 | 153668557 |
| chr1 | 153667554 | 153668557 |
| chr1 | 153682497 | 153685084 |
| chr1 | 153751094 | 153757763 |
| chr1 | 153752278 | 153759613 |
| chr1 | 153759525 | 153761676 |
| chr1 | 153759525 | 153765063 |
| chr1 | 153760310 | 153765063 |
| chr1 | 153761569 | 153765063 |
| chr1 | 153762727 | 153765063 |
| chr1 | 153811730 | 153813452 |
| chr1 | 153812021 | 153819735 |
| chr1 | 153816272 | 153819735 |
| chr1 | 153817371 | 153818171 |
| chr1 | 153818790 | 153819735 |
| chr1 | 153932203 | 153933030 |
| chr1 | 153932860 | 153933319 |
| chr1 | 153937487 | 153937863 |
| chr1 | 153937487 | 153944397 |
| chr1 | 153941230 | 153942113 |
| chr1 | 153951259 | 153952446 |
| chr1 | 154170399 | 154173201 |
| chr1 | 154170399 | 154176248 |
| chr1 | 154172907 | 154173201 |
| chr1 | 154172907 | 154176248 |
| chr1 | 154212319 | 154214574 |
| chr1 | 154225083 | 154228725 |
| chr1 | 154225083 | 154236611 |
| chr1 | 154225083 | 154237136 |
| chr1 | 154225083 | 154241565 |
| chr1 | 154227281 | 154237136 |
| chr1 | 154234590 | 154235291 |
| chr1 | 154234590 | 154237136 |
| chr1 | 154234590 | 154246375 |
| chr1 | 154235195 | 154246375 |
| chr1 | 154243216 | 154246375 |
| chr1 | 154246203 | 154251653 |
| chr1 | 154249238 | 154251653 |
| chr1 | 154249238 | 154257434 |
| chr1 | 154251040 | 154251653 |
| chr1 | 154251040 | 154257434 |



|      |           |           |
|------|-----------|-----------|
| chr1 | 154253899 | 154255755 |
| chr1 | 154257062 | 154257434 |
| chr1 | 15425870  | 15427284  |
| chr1 | 154258976 | 154266568 |
| chr1 | 154260891 | 154261697 |
| chr1 | 154260891 | 154266568 |
| chr1 | 154266500 | 154268954 |
| chr1 | 154273335 | 154273961 |
| chr1 | 154346230 | 154346758 |
| chr1 | 154434518 | 154449980 |
| chr1 | 15493891  | 15495452  |
| chr1 | 154965542 | 154966517 |
| chr1 | 154966161 | 154967797 |
| chr1 | 154966318 | 154967797 |
| chr1 | 154967670 | 154969448 |
| chr1 | 155239615 | 155240077 |
| chr1 | 155264220 | 155270977 |
| chr1 | 155264467 | 155270977 |
| chr1 | 155265859 | 155266895 |
| chr1 | 155265859 | 155270977 |
| chr1 | 15529087  | 15534303  |
| chr1 | 15529087  | 15536814  |
| chr1 | 15529087  | 15546871  |
| chr1 | 15529087  | 15548428  |
| chr1 | 155310042 | 155312395 |
| chr1 | 155341935 | 155346469 |
| chr1 | 15534236  | 15536814  |
| chr1 | 15534236  | 15548428  |
| chr1 | 155343313 | 155346469 |
| chr1 | 155346382 | 155347904 |
| chr1 | 155347655 | 155349596 |
| chr1 | 155349326 | 155354630 |
| chr1 | 155352705 | 155354630 |
| chr1 | 155352705 | 155357749 |
| chr1 | 155352705 | 155360409 |
| chr1 | 155357315 | 155357749 |
| chr1 | 155360300 | 155395553 |
| chr1 | 15536474  | 15548428  |
| chr1 | 155370503 | 155370983 |
| chr1 | 155370503 | 155459898 |
| chr1 | 155378280 | 155380116 |
| chr1 | 155378280 | 155395553 |
| chr1 | 155378280 | 155415923 |
| chr1 | 155395458 | 155439068 |
| chr1 | 155395458 | 155459898 |

|      |           |           |
|------|-----------|-----------|
| chr1 | 155415743 | 155439068 |
| chr1 | 155415743 | 155459898 |
| chr1 | 155438326 | 155459898 |
| chr1 | 15544398  | 15548428  |
| chr1 | 15562141  | 15564359  |
| chr1 | 15563928  | 15564359  |
| chr1 | 155661306 | 155672731 |
| chr1 | 155668626 | 155675096 |
| chr1 | 155668626 | 155679512 |
| chr1 | 155668626 | 155680456 |
| chr1 | 155670319 | 155679512 |
| chr1 | 155670319 | 155680456 |
| chr1 | 155675009 | 155679512 |
| chr1 | 155676547 | 155679512 |
| chr1 | 155676547 | 155680456 |
| chr1 | 155709032 | 155726019 |
| chr1 | 155709772 | 155717128 |
| chr1 | 155709772 | 155721618 |
| chr1 | 155717005 | 155721618 |
| chr1 | 155717005 | 155726019 |
| chr1 | 155721516 | 155726019 |
| chr1 | 155725381 | 155726019 |
| chr1 | 155725381 | 155727738 |
| chr1 | 155729041 | 155729366 |
| chr1 | 155754374 | 155757323 |
| chr1 | 155756957 | 155760641 |
| chr1 | 155773065 | 155776481 |
| chr1 | 155776394 | 155784089 |
| chr1 | 155777621 | 155784089 |
| chr1 | 155783985 | 155814449 |
| chr1 | 155785333 | 155815900 |
| chr1 | 155795049 | 155814449 |
| chr1 | 155795049 | 155827028 |
| chr1 | 155804948 | 155814449 |
| chr1 | 155804948 | 155816262 |
| chr1 | 155804948 | 155822476 |
| chr1 | 155813633 | 155814449 |
| chr1 | 155813633 | 155827028 |
| chr1 | 155820605 | 155827028 |
| chr1 | 155822285 | 155853806 |
| chr1 | 155904310 | 155904804 |
| chr1 | 155915872 | 155917672 |
| chr1 | 155915872 | 155921918 |
| chr1 | 155921374 | 155921918 |
| chr1 | 155921374 | 155923687 |

|      |           |           |
|------|-----------|-----------|
| chr1 | 155921374 | 155925843 |
| chr1 | 155923626 | 155929840 |
| chr1 | 155925631 | 155927156 |
| chr1 | 155926675 | 155927156 |
| chr1 | 155926675 | 155929840 |
| chr1 | 155954901 | 155958396 |
| chr1 | 155966415 | 155969300 |
| chr1 | 156014960 | 156018368 |
| chr1 | 156225556 | 156236483 |
| chr1 | 156265780 | 156266678 |
| chr1 | 156265780 | 156274686 |
| chr1 | 15626668  | 15638434  |
| chr1 | 15626668  | 15643650  |
| chr1 | 156268289 | 156279034 |
| chr1 | 156272319 | 156274686 |
| chr1 | 156272319 | 156278048 |
| chr1 | 15630324  | 15638434  |
| chr1 | 15630324  | 15643650  |
| chr1 | 15630324  | 15651895  |
| chr1 | 156317165 | 156317547 |
| chr1 | 156317165 | 156325089 |
| chr1 | 156320838 | 156334918 |
| chr1 | 156324971 | 156334918 |
| chr1 | 156333546 | 156334918 |
| chr1 | 156333546 | 156335888 |
| chr1 | 15638306  | 15643650  |
| chr1 | 15638306  | 15649823  |
| chr1 | 15638306  | 15651895  |
| chr1 | 15643521  | 15649823  |
| chr1 | 15643521  | 15651895  |
| chr1 | 156475107 | 156477202 |
| chr1 | 15649719  | 15651895  |
| chr1 | 156530104 | 156531247 |
| chr1 | 156743651 | 156745373 |
| chr1 | 156782281 | 156787174 |
| chr1 | 156782281 | 156797341 |
| chr1 | 156951572 | 156955799 |
| chr1 | 156963202 | 156977054 |
| chr1 | 156963202 | 156979286 |
| chr1 | 156971696 | 156986173 |
| chr1 | 156976982 | 156980486 |
| chr1 | 156976982 | 156986173 |
| chr1 | 15717892  | 15721388  |
| chr1 | 15719733  | 15721388  |
| chr1 | 15764495  | 15765233  |

|      |           |           |
|------|-----------|-----------|
| chr1 | 15767375  | 15768630  |
| chr1 | 15767375  | 15770578  |
| chr1 | 15767375  | 15774796  |
| chr1 | 15770408  | 15774796  |
| chr1 | 158084421 | 158088454 |
| chr1 | 15872815  | 15876678  |
| chr1 | 15909320  | 15916279  |
| chr1 | 15911100  | 15916279  |
| chr1 | 15911100  | 15922349  |
| chr1 | 15937162  | 15938006  |
| chr1 | 160231296 | 160240370 |
| chr1 | 160237134 | 160244034 |
| chr1 | 160279800 | 160283639 |
| chr1 | 160294483 | 160297745 |
| chr1 | 160305432 | 160305773 |
| chr1 | 160305432 | 160314125 |
| chr1 | 160311867 | 160313167 |
| chr1 | 160313084 | 160325652 |
| chr1 | 160323430 | 160332557 |
| chr1 | 160325542 | 160335322 |
| chr1 | 161102047 | 161102375 |
| chr1 | 161123838 | 161124526 |
| chr1 | 161162918 | 161164250 |
| chr1 | 161213379 | 161213921 |
| chr1 | 161323613 | 161328497 |
| chr1 | 161323613 | 161340655 |
| chr1 | 161323613 | 161356840 |
| chr1 | 16137852  | 16138430  |
| chr1 | 161751667 | 161752464 |
| chr1 | 161751865 | 161753261 |
| chr1 | 161752367 | 161753261 |
| chr1 | 161778243 | 161784096 |
| chr1 | 161778243 | 161792327 |
| chr1 | 161778243 | 161802272 |
| chr1 | 161778243 | 161863312 |
| chr1 | 161791407 | 161792327 |
| chr1 | 161791407 | 161802272 |
| chr1 | 161791407 | 161821161 |
| chr1 | 161791407 | 161863312 |
| chr1 | 161792123 | 161821161 |
| chr1 | 161802051 | 161821161 |
| chr1 | 161819632 | 161863312 |
| chr1 | 161846448 | 161853323 |
| chr1 | 161846448 | 161863312 |
| chr1 | 161851721 | 161912380 |

|      |           |           |
|------|-----------|-----------|
| chr1 | 16201781  | 16202574  |
| chr1 | 162333016 | 162357136 |
| chr1 | 162355186 | 162357136 |
| chr1 | 162499954 | 162501104 |
| chr1 | 162499954 | 162503848 |
| chr1 | 162503753 | 162512823 |
| chr1 | 162512499 | 162518190 |
| chr1 | 162566011 | 162576981 |
| chr1 | 162566011 | 162581459 |
| chr1 | 162566011 | 162588833 |
| chr1 | 162566011 | 162590511 |
| chr1 | 162566011 | 162597858 |
| chr1 | 162576776 | 162579603 |
| chr1 | 162576776 | 162581459 |
| chr1 | 162576776 | 162590511 |
| chr1 | 162579427 | 162588833 |
| chr1 | 162581286 | 162597858 |
| chr1 | 162587474 | 162588833 |
| chr1 | 162588692 | 162590511 |
| chr1 | 162655210 | 162719145 |
| chr1 | 162799742 | 162804323 |
| chr1 | 16305802  | 16315435  |
| chr1 | 163326031 | 163328907 |
| chr1 | 16391374  | 16393482  |
| chr1 | 16443631  | 16452015  |
| chr1 | 16447869  | 16452015  |
| chr1 | 16451837  | 16455893  |
| chr1 | 165665017 | 165683110 |
| chr1 | 165668925 | 165680683 |
| chr1 | 165679441 | 165683110 |
| chr1 | 165679441 | 165695397 |
| chr1 | 165682106 | 165683110 |
| chr1 | 165682106 | 165695397 |
| chr1 | 165890203 | 165891322 |
| chr1 | 165890203 | 165896332 |
| chr1 | 165890203 | 165903279 |
| chr1 | 166862202 | 166863921 |
| chr1 | 167765582 | 167773368 |
| chr1 | 167765582 | 167776166 |
| chr1 | 167772274 | 167773368 |
| chr1 | 167772274 | 167776166 |
| chr1 | 167919978 | 167924537 |
| chr1 | 167951799 | 167975015 |
| chr1 | 167966628 | 167975015 |
| chr1 | 167966628 | 167987608 |

|      |           |           |
|------|-----------|-----------|
| chr1 | 167966628 | 167993440 |
| chr1 | 167966628 | 168004793 |
| chr1 | 167987494 | 168004793 |
| chr1 | 168002481 | 168004793 |
| chr1 | 168002481 | 168015951 |
| chr1 | 168002481 | 168045227 |
| chr1 | 168015780 | 168023047 |
| chr1 | 168022987 | 168045227 |
| chr1 | 168022987 | 168068463 |
| chr1 | 168038370 | 168045227 |
| chr1 | 168038370 | 168068463 |
| chr1 | 168043024 | 168045227 |
| chr1 | 168063620 | 168068463 |
| chr1 | 168065589 | 168068463 |
| chr1 | 168096507 | 168114549 |
| chr1 | 168104476 | 168114549 |
| chr1 | 168183901 | 168184878 |
| chr1 | 168183901 | 168191500 |
| chr1 | 168231513 | 168231919 |
| chr1 | 168231513 | 168239160 |
| chr1 | 168291159 | 168305196 |
| chr1 | 168300421 | 168305196 |
| chr1 | 169230717 | 169237687 |
| chr1 | 169230717 | 169287408 |
| chr1 | 169230717 | 169298763 |
| chr1 | 169230717 | 169303195 |
| chr1 | 169230717 | 169310080 |
| chr1 | 169287302 | 169298763 |
| chr1 | 169287302 | 169303195 |
| chr1 | 169287302 | 169310080 |
| chr1 | 169298555 | 169310080 |
| chr1 | 169298555 | 169324500 |
| chr1 | 16930285  | 16931397  |
| chr1 | 169303144 | 169324500 |
| chr1 | 169309969 | 169324500 |
| chr1 | 169323116 | 169324500 |
| chr1 | 169376539 | 169380609 |
| chr1 | 169798856 | 169804240 |
| chr1 | 169798856 | 169806088 |
| chr1 | 169798856 | 169821759 |
| chr1 | 169798856 | 169823472 |
| chr1 | 169798856 | 169827199 |
| chr1 | 169798856 | 169832506 |
| chr1 | 169806003 | 169827199 |
| chr1 | 169830695 | 169843769 |

|      |           |           |
|------|-----------|-----------|
| chr1 | 169836926 | 169850345 |
| chr1 | 169859040 | 169873752 |
| chr1 | 169866895 | 169878819 |
| chr1 | 169875977 | 169878819 |
| chr1 | 169954010 | 169984690 |
| chr1 | 169972512 | 169992255 |
| chr1 | 170016461 | 170039288 |
| chr1 | 170016461 | 170055436 |
| chr1 | 170024417 | 170055436 |
| chr1 | 17022607  | 17024074  |
| chr1 | 170539209 | 170544845 |
| chr1 | 171512031 | 171513172 |
| chr1 | 171512031 | 171527844 |
| chr1 | 171522176 | 171523522 |
| chr1 | 171523220 | 171524965 |
| chr1 | 171523220 | 171527844 |
| chr1 | 171535427 | 171537473 |
| chr1 | 171568246 | 171571421 |
| chr1 | 171568246 | 171575128 |
| chr1 | 171568246 | 171587751 |
| chr1 | 171579353 | 171584526 |
| chr1 | 171584418 | 171588505 |
| chr1 | 171783739 | 171786078 |
| chr1 | 171783739 | 171790616 |
| chr1 | 171783739 | 171794527 |
| chr1 | 172042008 | 172048750 |
| chr1 | 172387132 | 172388809 |
| chr1 | 172551511 | 172557794 |
| chr1 | 172551511 | 172570730 |
| chr1 | 172551511 | 172579267 |
| chr1 | 172555868 | 172557794 |
| chr1 | 172555868 | 172570730 |
| chr1 | 172555868 | 172575623 |
| chr1 | 172555868 | 172579267 |
| chr1 | 172600063 | 172602787 |
| chr1 | 173481325 | 173486401 |
| chr1 | 173751763 | 173753307 |
| chr1 | 173751763 | 173757159 |
| chr1 | 173751763 | 173766289 |
| chr1 | 173755922 | 173757159 |
| chr1 | 173774304 | 173775842 |
| chr1 | 173807266 | 173811306 |
| chr1 | 173826686 | 173834519 |
| chr1 | 173830659 | 173833499 |
| chr1 | 173830659 | 173839546 |

|      |           |           |
|------|-----------|-----------|
| chr1 | 173830659 | 173840973 |
| chr1 | 173838189 | 173845291 |
| chr1 | 173839366 | 173840973 |
| chr1 | 173941264 | 173943588 |
| chr1 | 173941264 | 173943615 |
| chr1 | 173946475 | 173947582 |
| chr1 | 173961076 | 173970617 |
| chr1 | 173961076 | 173984619 |
| chr1 | 173964838 | 173972627 |
| chr1 | 17412121  | 17413717  |
| chr1 | 17416479  | 17420828  |
| chr1 | 174219124 | 174221164 |
| chr1 | 174219124 | 174231355 |
| chr1 | 174219124 | 174241657 |
| chr1 | 174220971 | 174252590 |
| chr1 | 174220971 | 174305127 |
| chr1 | 174231144 | 174305127 |
| chr1 | 174241482 | 174305127 |
| chr1 | 174250474 | 174305127 |
| chr1 | 174250474 | 174371072 |
| chr1 | 174250474 | 174394145 |
| chr1 | 174252479 | 174275935 |
| chr1 | 174272413 | 174305127 |
| chr1 | 174272413 | 174371072 |
| chr1 | 174272413 | 174394145 |
| chr1 | 174275832 | 174371072 |
| chr1 | 174275832 | 174394145 |
| chr1 | 174304985 | 174394145 |
| chr1 | 174370978 | 174394145 |
| chr1 | 174637374 | 174702256 |
| chr1 | 174637374 | 174811960 |
| chr1 | 174699524 | 174702256 |
| chr1 | 175004613 | 175008706 |
| chr1 | 17580552  | 17588479  |
| chr1 | 175986942 | 175989479 |
| chr1 | 175986942 | 176046324 |
| chr1 | 176027571 | 176046324 |
| chr1 | 176027571 | 176116681 |
| chr1 | 176027571 | 176136547 |
| chr1 | 176027571 | 176176007 |
| chr1 | 176043185 | 176046324 |
| chr1 | 176043185 | 176085890 |
| chr1 | 176043185 | 176136547 |
| chr1 | 176081151 | 176116681 |
| chr1 | 176081151 | 176136547 |



|      |           |           |
|------|-----------|-----------|
| chr1 | 176081151 | 176149074 |
| chr1 | 176116623 | 176136547 |
| chr1 | 176116623 | 176149074 |
| chr1 | 176116623 | 176176007 |
| chr1 | 176116623 | 176184692 |
| chr1 | 176135009 | 176149074 |
| chr1 | 176135009 | 176176007 |
| chr1 | 176149005 | 176163891 |
| chr1 | 176149005 | 176176007 |
| chr1 | 176149005 | 176184692 |
| chr1 | 176162868 | 176176007 |
| chr1 | 176162868 | 176184692 |
| chr1 | 17627329  | 17640302  |
| chr1 | 17648553  | 17664595  |
| chr1 | 178283563 | 178300118 |
| chr1 | 178283563 | 178390206 |
| chr1 | 178299991 | 178390206 |
| chr1 | 178464277 | 178467421 |
| chr1 | 178776681 | 178785607 |
| chr1 | 178776681 | 178811404 |
| chr1 | 178776681 | 178889696 |
| chr1 | 178808044 | 178833550 |
| chr1 | 178877497 | 178886120 |
| chr1 | 178877497 | 178894024 |
| chr1 | 178877497 | 178906867 |
| chr1 | 178885968 | 178906867 |
| chr1 | 1789052   | 1790596   |
| chr1 | 1790394   | 1817875   |
| chr1 | 179043714 | 179050365 |
| chr1 | 179043714 | 179054638 |
| chr1 | 179043714 | 179064496 |
| chr1 | 179085627 | 179088089 |
| chr1 | 179110281 | 179121867 |
| chr1 | 179112308 | 179117516 |
| chr1 | 179112308 | 179118764 |
| chr1 | 179117331 | 179118764 |
| chr1 | 179117331 | 179133374 |
| chr1 | 179118586 | 179120274 |
| chr1 | 179118586 | 179121867 |
| chr1 | 179120189 | 179121867 |
| chr1 | 179121594 | 179133374 |
| chr1 | 179131310 | 179133374 |
| chr1 | 179302676 | 179323495 |
| chr1 | 179302676 | 179343635 |
| chr1 | 179323436 | 179337896 |

|      |           |           |
|------|-----------|-----------|
| chr1 | 1793244   | 1806538   |
| chr1 | 1793244   | 1817875   |
| chr1 | 179335505 | 179337896 |
| chr1 | 179335505 | 179341310 |
| chr1 | 179335505 | 179343635 |
| chr1 | 179337836 | 179341310 |
| chr1 | 179337836 | 179342943 |
| chr1 | 179337836 | 179343635 |
| chr1 | 179337836 | 179350431 |
| chr1 | 179341027 | 179342943 |
| chr1 | 179341027 | 179348942 |
| chr1 | 179342113 | 179343635 |
| chr1 | 179347599 | 179348942 |
| chr1 | 179347599 | 179350431 |
| chr1 | 179378636 | 179385359 |
| chr1 | 179378636 | 179395202 |
| chr1 | 179393902 | 179395202 |
| chr1 | 179491537 | 179492951 |
| chr1 | 179900125 | 179908673 |
| chr1 | 179901301 | 179908673 |
| chr1 | 179986168 | 179992221 |
| chr1 | 179986168 | 179997175 |
| chr1 | 179986168 | 180006567 |
| chr1 | 179990506 | 179992221 |
| chr1 | 179990506 | 180015970 |
| chr1 | 180003173 | 180006567 |
| chr1 | 180022697 | 180024582 |
| chr1 | 180062219 | 180065272 |
| chr1 | 180062219 | 180075221 |
| chr1 | 180075021 | 180084178 |
| chr1 | 180075021 | 180090796 |
| chr1 | 180175320 | 180178884 |
| chr1 | 180183915 | 180194392 |
| chr1 | 180314691 | 180413471 |
| chr1 | 180314691 | 180495525 |
| chr1 | 180397515 | 180413471 |
| chr1 | 180397515 | 180430262 |
| chr1 | 180397515 | 180495525 |
| chr1 | 1804418   | 1806538   |
| chr1 | 1804418   | 1817875   |
| chr1 | 1804418   | 1825499   |
| chr1 | 1804418   | 1839238   |
| chr1 | 1806474   | 1817875   |
| chr1 | 1806474   | 1825499   |
| chr1 | 1806474   | 1839238   |

|      |           |           |
|------|-----------|-----------|
| chr1 | 180787752 | 180811488 |
| chr1 | 180803387 | 180811488 |
| chr1 | 180824752 | 180825344 |
| chr1 | 180824752 | 180863874 |
| chr1 | 180834873 | 180863874 |
| chr1 | 180984676 | 180988345 |
| chr1 | 180984676 | 180993425 |
| chr1 | 180984676 | 181005463 |
| chr1 | 180988238 | 180993425 |
| chr1 | 181002605 | 181005463 |
| chr1 | 1815755   | 1825499   |
| chr1 | 1815755   | 1839238   |
| chr1 | 1817836   | 1839238   |
| chr1 | 1825396   | 1839238   |
| chr1 | 182842544 | 182843434 |
| chr1 | 182842544 | 182860184 |
| chr1 | 182852232 | 182858894 |
| chr1 | 182874853 | 182881647 |
| chr1 | 183114530 | 183115637 |
| chr1 | 183114530 | 183118146 |
| chr1 | 183131298 | 183132537 |
| chr1 | 183512836 | 183517820 |
| chr1 | 183528891 | 183533326 |
| chr1 | 183533163 | 183544497 |
| chr1 | 183742125 | 183866073 |
| chr1 | 183880615 | 183897897 |
| chr1 | 184702810 | 184749592 |
| chr1 | 184706642 | 184711877 |
| chr1 | 184726254 | 184749592 |
| chr1 | 184732836 | 184749592 |
| chr1 | 184803584 | 184831962 |
| chr1 | 184823166 | 184831962 |
| chr1 | 184884632 | 184894206 |
| chr1 | 185087551 | 185093276 |
| chr1 | 185147181 | 185151935 |
| chr1 | 185204699 | 185206763 |
| chr1 | 185214506 | 185231708 |
| chr1 | 185299998 | 185305643 |
| chr1 | 185300436 | 185305643 |
| chr1 | 186318446 | 186318828 |
| chr1 | 186318446 | 186327660 |
| chr1 | 186343325 | 186344090 |
| chr1 | 186379766 | 186389624 |
| chr1 | 186379766 | 186394015 |
| chr1 | 186390710 | 186391791 |

|      |           |           |
|------|-----------|-----------|
| chr1 | 186390710 | 186394015 |
| chr1 | 186398312 | 186406268 |
| chr1 | 186977592 | 186979472 |
| chr1 | 18916902  | 18919773  |
| chr1 | 19126445  | 19129074  |
| chr1 | 19170761  | 19175033  |
| chr1 | 19172863  | 19185286  |
| chr1 | 19176591  | 19187540  |
| chr1 | 19183810  | 19185286  |
| chr1 | 19186539  | 19187540  |
| chr1 | 19192187  | 19192540  |
| chr1 | 19193432  | 19197265  |
| chr1 | 19193432  | 19201815  |
| chr1 | 19197140  | 19201815  |
| chr1 | 19232623  | 19235252  |
| chr1 | 19242344  | 19245030  |
| chr1 | 19255947  | 19257984  |
| chr1 | 19284685  | 19286372  |
| chr1 | 193028084 | 193029657 |
| chr1 | 193069033 | 193077050 |
| chr1 | 193069033 | 193082708 |
| chr1 | 193135390 | 193138173 |
| chr1 | 193135390 | 193152444 |
| chr1 | 193138084 | 193142066 |
| chr1 | 193138084 | 193152444 |
| chr1 | 193141849 | 193152444 |
| chr1 | 193141849 | 193212100 |
| chr1 | 193203794 | 193212477 |
| chr1 | 193203794 | 193236356 |
| chr1 | 193232992 | 193236356 |
| chr1 | 193232992 | 193249871 |
| chr1 | 19344357  | 19357563  |
| chr1 | 19356634  | 19357563  |
| chr1 | 19378539  | 19419750  |
| chr1 | 197117788 | 197139871 |
| chr1 | 197124109 | 197125191 |
| chr1 | 197129186 | 197139871 |
| chr1 | 197172159 | 197178512 |
| chr1 | 197172159 | 197191899 |
| chr1 | 19739823  | 19787117  |
| chr1 | 197553021 | 197658369 |
| chr1 | 197553021 | 197772932 |
| chr1 | 19755633  | 19787117  |
| chr1 | 197583151 | 197611976 |
| chr1 | 197583151 | 197617759 |

|      |           |           |
|------|-----------|-----------|
| chr1 | 197583151 | 197645743 |
| chr1 | 197583151 | 197658369 |
| chr1 | 197583151 | 197715074 |
| chr1 | 197583151 | 197772932 |
| chr1 | 197595207 | 197617759 |
| chr1 | 197595207 | 197715074 |
| chr1 | 197607072 | 197658369 |
| chr1 | 197617658 | 197658369 |
| chr1 | 197617658 | 197715074 |
| chr1 | 197617658 | 197772932 |
| chr1 | 197642710 | 197647114 |
| chr1 | 197642710 | 197652315 |
| chr1 | 197642710 | 197658369 |
| chr1 | 197642710 | 197674169 |
| chr1 | 197642710 | 197715074 |
| chr1 | 197642710 | 197772932 |
| chr1 | 197652234 | 197674169 |
| chr1 | 197652234 | 197715074 |
| chr1 | 197672036 | 197674169 |
| chr1 | 197672036 | 197715074 |
| chr1 | 197672036 | 197735796 |
| chr1 | 19770541  | 19798215  |
| chr1 | 197715030 | 197735796 |
| chr1 | 198232552 | 198264235 |
| chr1 | 198232552 | 198279061 |
| chr1 | 198232552 | 198297240 |
| chr1 | 198253039 | 198264235 |
| chr1 | 198253039 | 198279061 |
| chr1 | 198277960 | 198297240 |
| chr1 | 198292944 | 198297240 |
| chr1 | 19904266  | 19904987  |
| chr1 | 200554467 | 200559452 |
| chr1 | 200565068 | 200575691 |
| chr1 | 200580253 | 200592240 |
| chr1 | 200581200 | 200592240 |
| chr1 | 200586100 | 200592240 |
| chr1 | 200593666 | 200615609 |
| chr1 | 200600355 | 200602068 |
| chr1 | 200603225 | 200608928 |
| chr1 | 200608829 | 200615609 |
| chr1 | 200614317 | 200615609 |
| chr1 | 200659026 | 200666751 |
| chr1 | 200760838 | 200815644 |
| chr1 | 200807375 | 200815644 |
| chr1 | 200807375 | 200832845 |

|      |           |           |
|------|-----------|-----------|
| chr1 | 200815560 | 200832845 |
| chr1 | 201485282 | 201496304 |
| chr1 | 201780420 | 201781309 |
| chr1 | 201847278 | 201848594 |
| chr1 | 201852103 | 201857194 |
| chr1 | 201852103 | 201858994 |
| chr1 | 201854594 | 201857194 |
| chr1 | 201854594 | 201858994 |
| chr1 | 201857095 | 201858994 |
| chr1 | 201988903 | 202004496 |
| chr1 | 201996146 | 202000015 |
| chr1 | 202001375 | 202001767 |
| chr1 | 202001375 | 202003461 |
| chr1 | 202135149 | 202135800 |
| chr1 | 202333009 | 202335818 |
| chr1 | 202416786 | 202428929 |
| chr1 | 202422619 | 202449171 |
| chr1 | 202427039 | 202449171 |
| chr1 | 202428854 | 202434768 |
| chr1 | 202431479 | 202449171 |
| chr1 | 202440705 | 202449171 |
| chr1 | 202755270 | 202764145 |
| chr1 | 202773117 | 202777094 |
| chr1 | 202893238 | 202895717 |
| chr1 | 203067694 | 203071760 |
| chr1 | 203707008 | 203708104 |
| chr1 | 203816925 | 203818689 |
| chr1 | 203816925 | 203840374 |
| chr1 | 203828298 | 203831771 |
| chr1 | 203828298 | 203840374 |
| chr1 | 204112914 | 204114605 |
| chr1 | 204112914 | 204117707 |
| chr1 | 204116506 | 204117707 |
| chr1 | 204525483 | 204532246 |
| chr1 | 205103856 | 205105168 |
| chr1 | 205150679 | 205157386 |
| chr1 | 205157272 | 205187806 |
| chr1 | 2055440   | 2059591   |
| chr1 | 205618956 | 205623891 |
| chr1 | 205720500 | 205729621 |
| chr1 | 205723925 | 205729621 |
| chr1 | 206415888 | 206430222 |
| chr1 | 206430161 | 206440081 |
| chr1 | 206446074 | 206455024 |
| chr1 | 20652620  | 20656187  |

|      |           |           |
|------|-----------|-----------|
| chr1 | 207061952 | 207065160 |
| chr1 | 20713453  | 20715639  |
| chr1 | 20747543  | 20776750  |
| chr1 | 20749722  | 20773610  |
| chr1 | 20757165  | 20767664  |
| chr1 | 20757165  | 20771073  |
| chr1 | 20757165  | 20773610  |
| chr1 | 20757165  | 20779911  |
| chr1 | 20757165  | 20780540  |
| chr1 | 20765376  | 20773610  |
| chr1 | 20765376  | 20776750  |
| chr1 | 20767583  | 20773610  |
| chr1 | 20770929  | 20773610  |
| chr1 | 20770929  | 20780540  |
| chr1 | 207757013 | 207759724 |
| chr1 | 207757013 | 207770362 |
| chr1 | 20776596  | 20779911  |
| chr1 | 20840855  | 20865262  |
| chr1 | 20849414  | 20851478  |
| chr1 | 20851257  | 20886371  |
| chr1 | 20857402  | 20862332  |
| chr1 | 20857402  | 20886371  |
| chr1 | 20879322  | 20892729  |
| chr1 | 20893516  | 20895501  |
| chr1 | 20893516  | 20942330  |
| chr1 | 20899696  | 20904971  |
| chr1 | 20904882  | 20942330  |
| chr1 | 20941490  | 20950111  |
| chr1 | 20969473  | 20980448  |
| chr1 | 20969473  | 20981227  |
| chr1 | 20980333  | 20981227  |
| chr1 | 21050865  | 21089213  |
| chr1 | 21050865  | 21111383  |
| chr1 | 210587897 | 210623670 |
| chr1 | 211260107 | 211289396 |
| chr1 | 211353238 | 211354467 |
| chr1 | 211353238 | 211361162 |
| chr1 | 211778917 | 211793190 |
| chr1 | 211787631 | 211793190 |
| chr1 | 211944783 | 211952701 |
| chr1 | 212006638 | 212011421 |
| chr1 | 212006638 | 212021212 |
| chr1 | 212016885 | 212021212 |
| chr1 | 212020121 | 212021212 |
| chr1 | 212042992 | 212047417 |

|      |           |           |
|------|-----------|-----------|
| chr1 | 212042992 | 212080750 |
| chr1 | 212068223 | 212080750 |
| chr1 | 21221746  | 21228041  |
| chr1 | 212329134 | 212342280 |
| chr1 | 212329134 | 212347406 |
| chr1 | 212342187 | 212347406 |
| chr1 | 21235849  | 21238244  |
| chr1 | 21244988  | 21260392  |
| chr1 | 21244988  | 21279332  |
| chr1 | 21260270  | 21272911  |
| chr1 | 21272698  | 21290156  |
| chr1 | 212863724 | 212872818 |
| chr1 | 212863724 | 212885396 |
| chr1 | 212863724 | 212888001 |
| chr1 | 212863724 | 212888594 |
| chr1 | 212872677 | 212889257 |
| chr1 | 212997154 | 213008466 |
| chr1 | 212997154 | 213013418 |
| chr1 | 213071005 | 213117410 |
| chr1 | 213071005 | 213176492 |
| chr1 | 213072869 | 213104569 |
| chr1 | 213077695 | 213117410 |
| chr1 | 213077695 | 213129889 |
| chr1 | 213104453 | 213129889 |
| chr1 | 213117316 | 213129889 |
| chr1 | 213129526 | 213176492 |
| chr1 | 213167857 | 213176492 |
| chr1 | 213240701 | 213242658 |
| chr1 | 2135261   | 2150978   |
| chr1 | 214314761 | 214318983 |
| chr1 | 214369456 | 214372839 |
| chr1 | 214383310 | 214398001 |
| chr1 | 2144209   | 2150978   |
| chr1 | 2144209   | 2156092   |
| chr1 | 214451804 | 214464957 |
| chr1 | 214629045 | 214638001 |
| chr1 | 214644556 | 214648827 |
| chr1 | 21470631  | 21473585  |
| chr1 | 2148871   | 2156092   |
| chr1 | 215573785 | 215579999 |
| chr1 | 215573785 | 215586685 |
| chr1 | 215575900 | 215579137 |
| chr1 | 215586494 | 215595471 |
| chr1 | 21680807  | 21695221  |
| chr1 | 21680807  | 21706187  |



|      |           |           |
|------|-----------|-----------|
| chr1 | 21680807  | 21724095  |
| chr1 | 21701497  | 21703618  |
| chr1 | 21701497  | 21706868  |
| chr1 | 21715388  | 21721764  |
| chr1 | 21721035  | 21751615  |
| chr1 | 21723897  | 21736625  |
| chr1 | 21747066  | 21751615  |
| chr1 | 21747066  | 21753119  |
| chr1 | 21747066  | 21757783  |
| chr1 | 21748137  | 21751615  |
| chr1 | 21748137  | 21753119  |
| chr1 | 21751506  | 21757783  |
| chr1 | 217610320 | 217614202 |
| chr1 | 21842769  | 21849031  |
| chr1 | 21847353  | 21849031  |
| chr1 | 21861756  | 21862115  |
| chr1 | 219972068 | 219978719 |
| chr1 | 219996982 | 220007338 |
| chr1 | 220001137 | 220007338 |
| chr1 | 220005247 | 220007338 |
| chr1 | 220005247 | 220019079 |
| chr1 | 220006105 | 220007338 |
| chr1 | 220102128 | 220102777 |
| chr1 | 220102128 | 220103562 |
| chr1 | 220136808 | 220139139 |
| chr1 | 220141802 | 220145653 |
| chr1 | 220167292 | 220195377 |
| chr1 | 220182256 | 220182931 |
| chr1 | 220191067 | 220210876 |
| chr1 | 220212886 | 220213979 |
| chr1 | 22074093  | 22086866  |
| chr1 | 22078428  | 22086866  |
| chr1 | 222569509 | 222570665 |
| chr1 | 222577444 | 222579872 |
| chr1 | 222648828 | 222654793 |
| chr1 | 222654388 | 222659657 |
| chr1 | 222658721 | 222660314 |
| chr1 | 222686929 | 222703217 |
| chr1 | 222715683 | 222724164 |
| chr1 | 222724091 | 222725555 |
| chr1 | 222725449 | 222730177 |
| chr1 | 223744099 | 223745439 |
| chr1 | 223746996 | 223749122 |
| chr1 | 223759269 | 223762251 |
| chr1 | 223759269 | 223772239 |

|      |           |           |
|------|-----------|-----------|
| chr1 | 223799898 | 223821367 |
| chr1 | 223804173 | 223806947 |
| chr1 | 223804173 | 223810513 |
| chr1 | 223806845 | 223821367 |
| chr1 | 223810430 | 223814353 |
| chr1 | 223810430 | 223818337 |
| chr1 | 224130471 | 224134212 |
| chr1 | 224231225 | 224268133 |
| chr1 | 224233200 | 224268133 |
| chr1 | 224236505 | 224268133 |
| chr1 | 224250211 | 224268133 |
| chr1 | 224250211 | 224281185 |
| chr1 | 224268033 | 224289733 |
| chr1 | 224281122 | 224300663 |
| chr1 | 224281122 | 224303857 |
| chr1 | 224286025 | 224289733 |
| chr1 | 224294266 | 224303857 |
| chr1 | 224296500 | 224303857 |
| chr1 | 224296500 | 224308263 |
| chr1 | 224304735 | 224305166 |
| chr1 | 224365878 | 224371423 |
| chr1 | 224393827 | 224399034 |
| chr1 | 224398096 | 224399034 |
| chr1 | 224398096 | 224401069 |
| chr1 | 224400949 | 224404570 |
| chr1 | 224411426 | 224419615 |
| chr1 | 224418259 | 224424654 |
| chr1 | 22489879  | 22491533  |
| chr1 | 224952669 | 224964609 |
| chr1 | 224952669 | 224968874 |
| chr1 | 224952669 | 224974153 |
| chr1 | 224952669 | 225007544 |
| chr1 | 224952669 | 225043983 |
| chr1 | 225002782 | 225007544 |
| chr1 | 225002782 | 225023865 |
| chr1 | 225002782 | 225097239 |
| chr1 | 225007412 | 225023865 |
| chr1 | 225007412 | 225097239 |
| chr1 | 22501491  | 22502441  |
| chr1 | 225038693 | 225043114 |
| chr1 | 225038693 | 225043789 |
| chr1 | 225038693 | 225043983 |
| chr1 | 225038693 | 225085789 |
| chr1 | 225038693 | 225097239 |
| chr1 | 225038693 | 225152883 |

|      |           |           |
|------|-----------|-----------|
| chr1 | 225079206 | 225097239 |
| chr1 | 225080378 | 225097239 |
| chr1 | 225082548 | 225152883 |
| chr1 | 225097117 | 225100884 |
| chr1 | 225117683 | 225147249 |
| chr1 | 225117683 | 225152883 |
| chr1 | 225152004 | 225153826 |
| chr1 | 225152004 | 225159485 |
| chr1 | 225167938 | 225185425 |
| chr1 | 225167938 | 225206179 |
| chr1 | 225167938 | 225231151 |
| chr1 | 225167938 | 225266769 |
| chr1 | 225185290 | 225192911 |
| chr1 | 225185290 | 225206179 |
| chr1 | 225185290 | 225207220 |
| chr1 | 225185290 | 225240822 |
| chr1 | 225204182 | 225231151 |
| chr1 | 225231072 | 225290082 |
| chr1 | 225252300 | 225259253 |
| chr1 | 225264196 | 225290082 |
| chr1 | 225270734 | 225273125 |
| chr1 | 225412453 | 225415332 |
| chr1 | 225412453 | 225419798 |
| chr1 | 225412453 | 225424089 |
| chr1 | 225417983 | 225424089 |
| chr1 | 225512870 | 225517306 |
| chr1 | 225554905 | 225567414 |
| chr1 | 225871075 | 225879410 |
| chr1 | 225921207 | 225921644 |
| chr1 | 226152334 | 226159358 |
| chr1 | 226159183 | 226166000 |
| chr1 | 226233095 | 226239096 |
| chr1 | 226265532 | 226301205 |
| chr1 | 226266212 | 226277932 |
| chr1 | 226277774 | 226287797 |
| chr1 | 226286332 | 226287797 |
| chr1 | 226295841 | 226301205 |
| chr1 | 226388655 | 226392314 |
| chr1 | 226871261 | 226875550 |
| chr1 | 226885537 | 226889049 |
| chr1 | 226961376 | 226965737 |
| chr1 | 226994822 | 227005111 |
| chr1 | 227004993 | 227017050 |
| chr1 | 227016079 | 227035607 |
| chr1 | 227026054 | 227035607 |

|      |           |           |
|------|-----------|-----------|
| chr1 | 227026054 | 227048010 |
| chr1 | 227035470 | 227069853 |
| chr1 | 227069776 | 227074364 |
| chr1 | 227112311 | 227112913 |
| chr1 | 227119803 | 227147559 |
| chr1 | 227119803 | 227160636 |
| chr1 | 227139575 | 227147559 |
| chr1 | 227139575 | 227213219 |
| chr1 | 227142944 | 227147559 |
| chr1 | 227160542 | 227213219 |
| chr1 | 227193785 | 227199652 |
| chr1 | 227193785 | 227213219 |
| chr1 | 227193785 | 227254155 |
| chr1 | 227747691 | 227759485 |
| chr1 | 227747691 | 227767083 |
| chr1 | 227758994 | 227767083 |
| chr1 | 22781420  | 22785076  |
| chr1 | 228213440 | 228215098 |
| chr1 | 228213440 | 228264391 |
| chr1 | 228291897 | 228304566 |
| chr1 | 22863036  | 22882483  |
| chr1 | 229444913 | 229465519 |
| chr1 | 229458160 | 229460769 |
| chr1 | 229458160 | 229463676 |
| chr1 | 229460610 | 229465519 |
| chr1 | 229463542 | 229465519 |
| chr1 | 229463542 | 229475732 |
| chr1 | 229466633 | 229487613 |
| chr1 | 229470579 | 229502102 |
| chr1 | 229486370 | 229487613 |
| chr1 | 229486370 | 229498306 |
| chr1 | 229489954 | 229496047 |
| chr1 | 229489954 | 229498306 |
| chr1 | 229495494 | 229496047 |
| chr1 | 229525935 | 229531731 |
| chr1 | 229525935 | 229540752 |
| chr1 | 229525935 | 229542371 |
| chr1 | 229527228 | 229542371 |
| chr1 | 229530198 | 229531731 |
| chr1 | 229530198 | 229542371 |
| chr1 | 229539455 | 229542371 |
| chr1 | 229539455 | 229549434 |
| chr1 | 229542236 | 229547701 |
| chr1 | 229632268 | 229647752 |
| chr1 | 229632268 | 229654388 |

|      |           |           |
|------|-----------|-----------|
| chr1 | 229643532 | 229654388 |
| chr1 | 230178217 | 230203290 |
| chr1 | 230236013 | 230243427 |
| chr1 | 230236013 | 230249271 |
| chr1 | 230236013 | 230250560 |
| chr1 | 230243305 | 230246150 |
| chr1 | 230243305 | 230250560 |
| chr1 | 230243305 | 230255344 |
| chr1 | 230243305 | 230265367 |
| chr1 | 230246062 | 230250560 |
| chr1 | 230249183 | 230255344 |
| chr1 | 230262572 | 230265367 |
| chr1 | 2302977   | 2304585   |
| chr1 | 23030468  | 23044486  |
| chr1 | 23030468  | 23050520  |
| chr1 | 23030468  | 23053839  |
| chr1 | 23030468  | 23059167  |
| chr1 | 23044426  | 23057565  |
| chr1 | 23044426  | 23059167  |
| chr1 | 23050386  | 23057565  |
| chr1 | 23050386  | 23059167  |
| chr1 | 23053760  | 23059167  |
| chr1 | 23055068  | 23057565  |
| chr1 | 23055068  | 23069151  |
| chr1 | 23055068  | 23079667  |
| chr1 | 230659463 | 230664587 |
| chr1 | 230659463 | 230679052 |
| chr1 | 230663140 | 230664587 |
| chr1 | 230663140 | 230671640 |
| chr1 | 230663140 | 230675124 |
| chr1 | 230663140 | 230679052 |
| chr1 | 230664483 | 230683635 |
| chr1 | 230669355 | 230671640 |
| chr1 | 23071224  | 23072197  |
| chr1 | 23071224  | 23073403  |
| chr1 | 230933778 | 230961303 |
| chr1 | 230943805 | 230954403 |
| chr1 | 230943805 | 230958299 |
| chr1 | 230943805 | 230961303 |
| chr1 | 230945388 | 230958299 |
| chr1 | 230945388 | 230961303 |
| chr1 | 230954332 | 230961303 |
| chr1 | 230995759 | 230997267 |
| chr1 | 23109021  | 23109650  |
| chr1 | 231270757 | 231276196 |

|      |           |           |
|------|-----------|-----------|
| chr1 | 231370561 | 231374099 |
| chr1 | 231529254 | 231542611 |
| chr1 | 231537212 | 231542611 |
| chr1 | 231616643 | 231618059 |
| chr1 | 231795241 | 231818517 |
| chr1 | 232415493 | 232432471 |
| chr1 | 232490873 | 232493660 |
| chr1 | 232955556 | 232956443 |
| chr1 | 232998250 | 233001681 |
| chr1 | 233014664 | 233025399 |
| chr1 | 233014664 | 233057290 |
| chr1 | 233025145 | 233057290 |
| chr1 | 233025145 | 233208689 |
| chr1 | 233054267 | 233057290 |
| chr1 | 233054267 | 233095863 |
| chr1 | 233054267 | 233179175 |
| chr1 | 233090060 | 233095863 |
| chr1 | 233090060 | 233161363 |
| chr1 | 233090060 | 233208689 |
| chr1 | 233135012 | 233139855 |
| chr1 | 233135012 | 233161363 |
| chr1 | 233135012 | 233179175 |
| chr1 | 233135012 | 233208689 |
| chr1 | 233160282 | 233179175 |
| chr1 | 233160282 | 233208689 |
| chr1 | 233160282 | 233227371 |
| chr1 | 233177801 | 233200264 |
| chr1 | 233177801 | 233208689 |
| chr1 | 233177801 | 233227371 |
| chr1 | 233177801 | 233252788 |
| chr1 | 233198938 | 233208689 |
| chr1 | 233198938 | 233218184 |
| chr1 | 233198938 | 233227371 |
| chr1 | 233198938 | 233236980 |
| chr1 | 233198938 | 233252788 |
| chr1 | 233198938 | 233259344 |
| chr1 | 233200153 | 233259344 |
| chr1 | 233208517 | 233218184 |
| chr1 | 233208517 | 233236980 |
| chr1 | 233208517 | 233252788 |
| chr1 | 23321527  | 23323732  |
| chr1 | 233217898 | 233227371 |
| chr1 | 233217898 | 233236980 |
| chr1 | 233217898 | 233252788 |
| chr1 | 233227225 | 233236980 |

|      |           |           |
|------|-----------|-----------|
| chr1 | 233227225 | 233252788 |
| chr1 | 233227225 | 233259344 |
| chr1 | 233227225 | 233263163 |
| chr1 | 23323555  | 23333631  |
| chr1 | 233236844 | 233263163 |
| chr1 | 233250738 | 233263163 |
| chr1 | 233252353 | 233259344 |
| chr1 | 233258027 | 233261321 |
| chr1 | 233346441 | 233355011 |
| chr1 | 233346441 | 233362293 |
| chr1 | 233346441 | 233376527 |
| chr1 | 233353806 | 233355011 |
| chr1 | 233353806 | 233362293 |
| chr1 | 23337753  | 23338608  |
| chr1 | 234418083 | 234427766 |
| chr1 | 234418083 | 234448579 |
| chr1 | 234418083 | 234472811 |
| chr1 | 234425672 | 234427766 |
| chr1 | 234446802 | 234467650 |
| chr1 | 234448479 | 234459326 |
| chr1 | 234450427 | 234472811 |
| chr1 | 234457666 | 234472811 |
| chr1 | 23451478  | 23456194  |
| chr1 | 235113767 | 235122372 |
| chr1 | 235135651 | 235138174 |
| chr1 | 235135651 | 235152765 |
| chr1 | 235137876 | 235155112 |
| chr1 | 235148403 | 235155112 |
| chr1 | 235152705 | 235155112 |
| chr1 | 235172617 | 235177913 |
| chr1 | 235229230 | 235246511 |
| chr1 | 235229230 | 235257225 |
| chr1 | 235234412 | 235255750 |
| chr1 | 235240312 | 235260752 |
| chr1 | 235246419 | 235260752 |
| chr1 | 235252729 | 235260752 |
| chr1 | 235255659 | 235260752 |
| chr1 | 235419416 | 235434280 |
| chr1 | 235419472 | 235430804 |
| chr1 | 235419472 | 235434280 |
| chr1 | 235427139 | 235434280 |
| chr1 | 235427139 | 235437474 |
| chr1 | 235434203 | 235437474 |
| chr1 | 235437321 | 235441882 |
| chr1 | 235438768 | 235441882 |

|      |           |           |
|------|-----------|-----------|
| chr1 | 235438768 | 235442911 |
| chr1 | 235453089 | 235494828 |
| chr1 | 235454155 | 235455684 |
| chr1 | 235455558 | 235484515 |
| chr1 | 235458602 | 235470960 |
| chr1 | 235465635 | 235470960 |
| chr1 | 235465635 | 235484515 |
| chr1 | 235465635 | 235494828 |
| chr1 | 235470849 | 235484515 |
| chr1 | 235470849 | 235494828 |
| chr1 | 235470849 | 235496308 |
| chr1 | 235480053 | 235489268 |
| chr1 | 235480053 | 235494828 |
| chr1 | 235480053 | 235496308 |
| chr1 | 235484321 | 235494828 |
| chr1 | 235484321 | 235496308 |
| chr1 | 235494680 | 235496308 |
| chr1 | 235677090 | 235697272 |
| chr1 | 235686948 | 235693486 |
| chr1 | 235686948 | 235697272 |
| chr1 | 235693349 | 235716778 |
| chr1 | 235755477 | 235762851 |
| chr1 | 235762719 | 235775086 |
| chr1 | 235766078 | 235770297 |
| chr1 | 235773841 | 235777308 |
| chr1 | 235780864 | 235782087 |
| chr1 | 235791698 | 235793612 |
| chr1 | 235793502 | 235801097 |
| chr1 | 235800319 | 235801097 |
| chr1 | 235830225 | 235833667 |
| chr1 | 235985378 | 235991058 |
| chr1 | 236011920 | 236017273 |
| chr1 | 236017147 | 236038253 |
| chr1 | 236024069 | 236038253 |
| chr1 | 236029549 | 236048989 |
| chr1 | 236032400 | 236038253 |
| chr1 | 236038103 | 236048989 |
| chr1 | 236041909 | 236048989 |
| chr1 | 236168705 | 236178636 |
| chr1 | 236168705 | 236180028 |
| chr1 | 236168705 | 236183906 |
| chr1 | 236168705 | 236205250 |
| chr1 | 236178413 | 236180028 |
| chr1 | 236178413 | 236183906 |
| chr1 | 236220831 | 236222010 |



|      |           |           |
|------|-----------|-----------|
| chr1 | 236249884 | 236253505 |
| chr1 | 236581221 | 236588043 |
| chr1 | 236582735 | 236588043 |
| chr1 | 236594011 | 236596976 |
| chr1 | 236803427 | 236806233 |
| chr1 | 236803427 | 236816543 |
| chr1 | 236803427 | 236838599 |
| chr1 | 236803427 | 236853088 |
| chr1 | 236806143 | 236816543 |
| chr1 | 236824118 | 236826896 |
| chr1 | 236824118 | 236838599 |
| chr1 | 236824118 | 236853088 |
| chr1 | 236824118 | 236863554 |
| chr1 | 236826828 | 236835687 |
| chr1 | 236835546 | 236838599 |
| chr1 | 236850343 | 236853088 |
| chr1 | 236859832 | 236863554 |
| chr1 | 2372480   | 2389996   |
| chr1 | 23750844  | 23752518  |
| chr1 | 23772110  | 23772426  |
| chr1 | 23785674  | 23786423  |
| chr1 | 23808134  | 23820593  |
| chr1 | 23814189  | 23820593  |
| chr1 | 23816674  | 23820593  |
| chr1 | 2395783   | 2402342   |
| chr1 | 23971572  | 23972012  |
| chr1 | 23971849  | 23978817  |
| chr1 | 240123178 | 240178068 |
| chr1 | 240123178 | 240188262 |
| chr1 | 240123178 | 240258032 |
| chr1 | 240123178 | 240294883 |
| chr1 | 240177920 | 240188262 |
| chr1 | 240177920 | 240211235 |
| chr1 | 240177920 | 240294883 |
| chr1 | 240188206 | 240211235 |
| chr1 | 240188206 | 240294883 |
| chr1 | 240206798 | 240211235 |
| chr1 | 240206798 | 240258032 |
| chr1 | 240206798 | 240294883 |
| chr1 | 240206798 | 240334229 |
| chr1 | 240206798 | 240392562 |
| chr1 | 240211090 | 240334229 |
| chr1 | 240257944 | 240294883 |
| chr1 | 240257944 | 240334229 |
| chr1 | 240257944 | 240355908 |

|      |           |           |
|------|-----------|-----------|
| chr1 | 240257944 | 240392562 |
| chr1 | 240294821 | 240334229 |
| chr1 | 240294821 | 240355908 |
| chr1 | 240294821 | 240392562 |
| chr1 | 240329075 | 240330749 |
| chr1 | 240329075 | 240334229 |
| chr1 | 240329075 | 240355908 |
| chr1 | 240333886 | 240392562 |
| chr1 | 240355815 | 240438210 |
| chr1 | 240392510 | 240438210 |
| chr1 | 241506002 | 241508785 |
| chr1 | 241511966 | 241517316 |
| chr1 | 24169416  | 24180854  |
| chr1 | 241850408 | 241861502 |
| chr1 | 241866829 | 241882017 |
| chr1 | 241866829 | 241885507 |
| chr1 | 243136142 | 243156455 |
| chr1 | 243164283 | 243225321 |
| chr1 | 243169627 | 243186422 |
| chr1 | 243169627 | 243225321 |
| chr1 | 243185778 | 243186422 |
| chr1 | 243185778 | 243191494 |
| chr1 | 243185778 | 243211964 |
| chr1 | 243186258 | 243200680 |
| chr1 | 243191017 | 243225321 |
| chr1 | 243199059 | 243211964 |
| chr1 | 243199059 | 243221813 |
| chr1 | 243199059 | 243225321 |
| chr1 | 243221723 | 243225321 |
| chr1 | 243270104 | 243286397 |
| chr1 | 243270104 | 243293219 |
| chr1 | 243270104 | 243304777 |
| chr1 | 243270104 | 243308177 |
| chr1 | 243270104 | 243316893 |
| chr1 | 243270104 | 243330692 |
| chr1 | 243270104 | 243344331 |
| chr1 | 243274542 | 243304777 |
| chr1 | 243274542 | 243378863 |
| chr1 | 243286271 | 243344331 |
| chr1 | 243286271 | 243418076 |
| chr1 | 243293090 | 243308177 |
| chr1 | 243293090 | 243330692 |
| chr1 | 243293090 | 243344331 |
| chr1 | 243304712 | 243316893 |
| chr1 | 243304712 | 243330692 |

|      |           |           |
|------|-----------|-----------|
| chr1 | 243304712 | 243341173 |
| chr1 | 243304712 | 243344331 |
| chr1 | 243307988 | 243344331 |
| chr1 | 243316754 | 243378863 |
| chr1 | 243330539 | 243344331 |
| chr1 | 243341038 | 243378863 |
| chr1 | 243378720 | 243418076 |
| chr1 | 243415701 | 243418076 |
| chr1 | 243415701 | 243426558 |
| chr1 | 243512323 | 243573048 |
| chr1 | 243512323 | 243615161 |
| chr1 | 243512323 | 243843282 |
| chr1 | 243545509 | 243563848 |
| chr1 | 243545509 | 243573048 |
| chr1 | 243545509 | 243637742 |
| chr1 | 243545509 | 243843282 |
| chr1 | 243552728 | 243573048 |
| chr1 | 243563719 | 243695716 |
| chr1 | 243563719 | 243843282 |
| chr1 | 243572925 | 243695716 |
| chr1 | 243613670 | 243637742 |
| chr1 | 243613670 | 243664883 |
| chr1 | 243613670 | 243695716 |
| chr1 | 243613670 | 243843282 |
| chr1 | 243637610 | 243664883 |
| chr1 | 243637610 | 243695716 |
| chr1 | 243645892 | 243843282 |
| chr1 | 243664771 | 243695716 |
| chr1 | 243664771 | 243843282 |
| chr1 | 243695590 | 243843282 |
| chr1 | 244411286 | 244417752 |
| chr1 | 244411286 | 244424387 |
| chr1 | 244415980 | 244424387 |
| chr1 | 244418759 | 244420296 |
| chr1 | 244422834 | 244424387 |
| chr1 | 244422834 | 244432595 |
| chr1 | 244686596 | 244692020 |
| chr1 | 244858728 | 244859374 |
| chr1 | 245002120 | 245017326 |
| chr1 | 245002120 | 245059458 |
| chr1 | 245002120 | 245083688 |
| chr1 | 245017241 | 245059458 |
| chr1 | 245017241 | 245083688 |
| chr1 | 245059385 | 245083688 |
| chr1 | 245764040 | 245929937 |

|      |           |           |
|------|-----------|-----------|
| chr1 | 245858495 | 245863886 |
| chr1 | 245858495 | 245915640 |
| chr1 | 245858495 | 245929937 |
| chr1 | 245915529 | 245929937 |
| chr1 | 245927930 | 245929937 |
| chr1 | 246327200 | 246335474 |
| chr1 | 246327200 | 246355094 |
| chr1 | 24646666  | 24649029  |
| chr1 | 24649970  | 24651612  |
| chr1 | 246544520 | 246556721 |
| chr1 | 246544520 | 246557534 |
| chr1 | 246548544 | 246557534 |
| chr1 | 246551212 | 246557534 |
| chr1 | 246556572 | 246557534 |
| chr1 | 246621428 | 246634587 |
| chr1 | 246631893 | 246648037 |
| chr1 | 24666814  | 24670315  |
| chr1 | 246726891 | 246740301 |
| chr1 | 246726891 | 246744125 |
| chr1 | 246726891 | 246764357 |
| chr1 | 246735974 | 246740301 |
| chr1 | 246735974 | 246744125 |
| chr1 | 246740171 | 246758356 |
| chr1 | 246744075 | 246758356 |
| chr1 | 246758225 | 246766139 |
| chr1 | 246860898 | 246862153 |
| chr1 | 246863923 | 246867811 |
| chr1 | 246876036 | 246877302 |
| chr1 | 246876036 | 246888517 |
| chr1 | 246913231 | 246918377 |
| chr1 | 246988120 | 247000074 |
| chr1 | 246999347 | 247000074 |
| chr1 | 247159005 | 247159813 |
| chr1 | 247308474 | 247310456 |
| chr1 | 247328682 | 247330081 |
| chr1 | 247423229 | 247425599 |
| chr1 | 247423229 | 247436140 |
| chr1 | 247435969 | 247444821 |
| chr1 | 247443971 | 247444821 |
| chr1 | 247860616 | 247864935 |
| chr1 | 247860616 | 247868063 |
| chr1 | 247864704 | 247868063 |
| chr1 | 24797741  | 24827116  |
| chr1 | 24814093  | 24827116  |
| chr1 | 2484447   | 2489867   |

|      |           |           |
|------|-----------|-----------|
| chr1 | 248844482 | 248845662 |
| chr1 | 24919239  | 24929852  |
| chr1 | 2511337   | 2514089   |
| chr1 | 25340473  | 25343073  |
| chr1 | 25340473  | 25351693  |
| chr1 | 25340473  | 25352974  |
| chr1 | 25351625  | 25352974  |
| chr1 | 25351625  | 25356853  |
| chr1 | 25446761  | 25454382  |
| chr1 | 25448807  | 25454382  |
| chr1 | 25553921  | 25557267  |
| chr1 | 25554859  | 25557267  |
| chr1 | 25901490  | 25903813  |
| chr1 | 26239761  | 26244318  |
| chr1 | 26239761  | 26255865  |
| chr1 | 26239761  | 26259802  |
| chr1 | 26255170  | 26259802  |
| chr1 | 26257596  | 26259802  |
| chr1 | 26268482  | 26269614  |
| chr1 | 26268482  | 26272071  |
| chr1 | 26294204  | 26298062  |
| chr1 | 26432890  | 26438284  |
| chr1 | 26432890  | 26460144  |
| chr1 | 26438167  | 26447660  |
| chr1 | 26446315  | 26447660  |
| chr1 | 26446315  | 26460144  |
| chr1 | 26447558  | 26460144  |
| chr1 | 26457790  | 26460144  |
| chr1 | 26729650  | 26732792  |
| chr1 | 26760855  | 26763285  |
| chr1 | 26884159  | 26886133  |
| chr1 | 26924088  | 26941818  |
| chr1 | 26941456  | 26941818  |
| chr1 | 26941456  | 26945686  |
| chr1 | 26942659  | 26943065  |
| chr1 | 27105884  | 27107865  |
| chr1 | 27105884  | 27109777  |
| chr1 | 27107647  | 27114286  |
| chr1 | 27260955  | 27287861  |
| chr1 | 27260955  | 27298111  |
| chr1 | 27330719  | 27334281  |
| chr1 | 27414832  | 27428933  |
| chr1 | 27558304  | 27558883  |
| chr1 | 27668225  | 27669346  |
| chr1 | 27755194  | 27759627  |

|      |          |          |
|------|----------|----------|
| chr1 | 27789561 | 27793632 |
| chr1 | 27789561 | 27812268 |
| chr1 | 27832755 | 27843330 |
| chr1 | 27838698 | 27843330 |
| chr1 | 27841013 | 27843330 |
| chr1 | 27897004 | 27914169 |
| chr1 | 27906927 | 27907282 |
| chr1 | 27978373 | 28004419 |
| chr1 | 27988534 | 28004419 |
| chr1 | 27997319 | 28000049 |
| chr1 | 28004335 | 28017239 |
| chr1 | 28004335 | 28035680 |
| chr1 | 28010946 | 28017239 |
| chr1 | 28027788 | 28042650 |
| chr1 | 28027788 | 28058094 |
| chr1 | 28035543 | 28042650 |
| chr1 | 28035543 | 28048426 |
| chr1 | 28035543 | 28058094 |
| chr1 | 28038838 | 28058094 |
| chr1 | 28203746 | 28205349 |
| chr1 | 28269182 | 28279241 |
| chr1 | 28271673 | 28279241 |
| chr1 | 28274824 | 28279241 |
| chr1 | 28459084 | 28460292 |
| chr1 | 28459084 | 28466768 |
| chr1 | 28465684 | 28480604 |
| chr1 | 28473553 | 28476291 |
| chr1 | 28473553 | 28480604 |
| chr1 | 28476106 | 28480604 |
| chr1 | 28490950 | 28493091 |
| chr1 | 28491649 | 28493091 |
| chr1 | 28508127 | 28516867 |
| chr1 | 28529857 | 28531990 |
| chr1 | 28529857 | 28532350 |
| chr1 | 28560632 | 28564834 |
| chr1 | 28567293 | 28571900 |
| chr1 | 28571175 | 28571900 |
| chr1 | 28579532 | 28581229 |
| chr1 | 28580559 | 28581229 |
| chr1 | 28605371 | 28622165 |
| chr1 | 28617952 | 28622165 |
| chr1 | 28683582 | 28690186 |
| chr1 | 28683582 | 28697084 |
| chr1 | 28683585 | 28691709 |
| chr1 | 28690103 | 28691709 |

|      |          |          |
|------|----------|----------|
| chr1 | 28690103 | 28693045 |
| chr1 | 28690103 | 28704329 |
| chr1 | 28702437 | 28704329 |
| chr1 | 28704191 | 28710642 |
| chr1 | 28993329 | 28997319 |
| chr1 | 28993329 | 29097935 |
| chr1 | 29015691 | 29033245 |
| chr1 | 29015691 | 29039426 |
| chr1 | 29018223 | 29039426 |
| chr1 | 29035825 | 29039426 |
| chr1 | 29035825 | 29053312 |
| chr1 | 29058588 | 29097935 |
| chr1 | 29060421 | 29065158 |
| chr1 | 29060421 | 29097935 |
| chr1 | 29109335 | 29115803 |
| chr1 | 29150102 | 29154910 |
| chr1 | 29195940 | 29202045 |
| chr1 | 29216004 | 29216685 |
| chr1 | 29216004 | 29216812 |
| chr1 | 29258504 | 29260903 |
| chr1 | 30936642 | 30967310 |
| chr1 | 30945345 | 30950261 |
| chr1 | 30950132 | 30953981 |
| chr1 | 30953713 | 30967310 |
| chr1 | 30964673 | 30974802 |
| chr1 | 30964673 | 30981405 |
| chr1 | 30965981 | 30974802 |
| chr1 | 30974650 | 30981405 |
| chr1 | 30980061 | 30995220 |
| chr1 | 30980061 | 31007102 |
| chr1 | 30981311 | 31007102 |
| chr1 | 30992389 | 30995220 |
| chr1 | 30992389 | 31007102 |
| chr1 | 31005852 | 31007102 |
| chr1 | 31005852 | 31028864 |
| chr1 | 31028795 | 31059577 |
| chr1 | 31267870 | 31292006 |
| chr1 | 31269157 | 31292006 |
| chr1 | 31271378 | 31292006 |
| chr1 | 31281373 | 31292006 |
| chr1 | 31310043 | 31339048 |
| chr1 | 31319108 | 31348974 |
| chr1 | 31337174 | 31339048 |
| chr1 | 31337174 | 31348974 |
| chr1 | 31346639 | 31348974 |

|      |          |          |
|------|----------|----------|
| chr1 | 31423692 | 31425913 |
| chr1 | 31423692 | 31426823 |
| chr1 | 31737428 | 31740541 |
| chr1 | 31910037 | 31911826 |
| chr1 | 31910037 | 31919658 |
| chr1 | 31915894 | 31919658 |
| chr1 | 32030297 | 32031640 |
| chr1 | 32030297 | 32033334 |
| chr1 | 32030297 | 32037043 |
| chr1 | 32030297 | 32038619 |
| chr1 | 32030297 | 32045390 |
| chr1 | 32036909 | 32038036 |
| chr1 | 32036909 | 32038119 |
| chr1 | 32036909 | 32038619 |
| chr1 | 32036909 | 32039573 |
| chr1 | 32037834 | 32038619 |
| chr1 | 32091674 | 32100562 |
| chr1 | 32094783 | 32100562 |
| chr1 | 32154587 | 32158361 |
| chr1 | 32154587 | 32159531 |
| chr1 | 32160614 | 32167296 |
| chr1 | 32163234 | 32167296 |
| chr1 | 32184524 | 32188124 |
| chr1 | 32187953 | 32190249 |
| chr1 | 32192310 | 32193300 |
| chr1 | 32224033 | 32224475 |
| chr1 | 32224033 | 32226530 |
| chr1 | 32226170 | 32226530 |
| chr1 | 32324478 | 32327677 |
| chr1 | 32326938 | 32327677 |
| chr1 | 32383829 | 32386895 |
| chr1 | 32592930 | 32595223 |
| chr1 | 32627507 | 32634110 |
| chr1 | 32627507 | 32634792 |
| chr1 | 32631826 | 32634072 |
| chr1 | 32631826 | 32634110 |
| chr1 | 32631826 | 32634792 |
| chr1 | 32633644 | 32634110 |
| chr1 | 32633644 | 32634792 |
| chr1 | 32651913 | 32672526 |
| chr1 | 32657426 | 32672901 |
| chr1 | 32668224 | 32672901 |
| chr1 | 32779381 | 32781145 |
| chr1 | 32779381 | 32787075 |
| chr1 | 32782403 | 32787075 |



|      |          |          |
|------|----------|----------|
| chr1 | 32797762 | 32811057 |
| chr1 | 32810590 | 32811057 |
| chr1 | 32825312 | 32830067 |
| chr1 | 32825312 | 32853166 |
| chr1 | 32942251 | 32944159 |
| chr1 | 32942251 | 32945628 |
| chr1 | 32942251 | 32949774 |
| chr1 | 32948221 | 32949774 |
| chr1 | 33013206 | 33014594 |
| chr1 | 33276099 | 33281811 |
| chr1 | 34992233 | 35015162 |
| chr1 | 35010446 | 35012581 |
| chr1 | 35093913 | 35097566 |
| chr1 | 35093913 | 35110447 |
| chr1 | 35097316 | 35110447 |
| chr1 | 35104294 | 35104769 |
| chr1 | 35104294 | 35110447 |
| chr1 | 35358924 | 35361789 |
| chr1 | 35358924 | 35370627 |
| chr1 | 35370028 | 35370627 |
| chr1 | 35370028 | 35399576 |
| chr1 | 35381258 | 35381758 |
| chr1 | 35381258 | 35389082 |
| chr1 | 35381258 | 35390098 |
| chr1 | 35385441 | 35390098 |
| chr1 | 35388909 | 35390098 |
| chr1 | 35388909 | 35392352 |
| chr1 | 35398863 | 35399576 |
| chr1 | 35405022 | 35405468 |
| chr1 | 35405022 | 35408159 |
| chr1 | 35413971 | 35415714 |
| chr1 | 35460304 | 35466695 |
| chr1 | 35460304 | 35470960 |
| chr1 | 35466607 | 35479212 |
| chr1 | 35470862 | 35479212 |
| chr1 | 35474804 | 35479212 |
| chr1 | 35743140 | 35746992 |
| chr1 | 35745450 | 35746992 |
| chr1 | 35747906 | 35748604 |
| chr1 | 35747906 | 35753936 |
| chr1 | 35760341 | 35763321 |
| chr1 | 35816881 | 35822982 |
| chr1 | 35816881 | 35826835 |
| chr1 | 35816881 | 35841750 |
| chr1 | 35825312 | 35835993 |

|      |          |          |
|------|----------|----------|
| chr1 | 35831426 | 35835993 |
| chr1 | 35901473 | 35902337 |
| chr1 | 35901947 | 35902337 |
| chr1 | 35902203 | 35918423 |
| chr1 | 35913841 | 35915542 |
| chr1 | 35945691 | 35967075 |
| chr1 | 35945691 | 35973511 |
| chr1 | 35966954 | 35973511 |
| chr1 | 35972023 | 35973511 |
| chr1 | 36004340 | 36014048 |
| chr1 | 36004340 | 36027298 |
| chr1 | 36004340 | 36043548 |
| chr1 | 36008689 | 36014048 |
| chr1 | 36013629 | 36014048 |
| chr1 | 36034173 | 36040441 |
| chr1 | 36036176 | 36040441 |
| chr1 | 36039789 | 36040441 |
| chr1 | 36170970 | 36173478 |
| chr1 | 36172463 | 36176842 |
| chr1 | 36289059 | 36301084 |
| chr1 | 36307769 | 36309590 |
| chr1 | 36348699 | 36361340 |
| chr1 | 36358238 | 36358822 |
| chr1 | 36358238 | 36361340 |
| chr1 | 3682332  | 3683180  |
| chr1 | 3682332  | 3707791  |
| chr1 | 37574342 | 37576556 |
| chr1 | 37582222 | 37587495 |
| chr1 | 37695909 | 37703347 |
| chr1 | 37700435 | 37703347 |
| chr1 | 3781511  | 3784111  |
| chr1 | 3781511  | 3785203  |
| chr1 | 37835078 | 37835744 |
| chr1 | 37835078 | 37838756 |
| chr1 | 37864311 | 37868614 |
| chr1 | 3833861  | 3852421  |
| chr1 | 3865811  | 3872572  |
| chr1 | 38851614 | 38856980 |
| chr1 | 38998170 | 39001106 |
| chr1 | 39231181 | 39258028 |
| chr1 | 39295786 | 39300362 |
| chr1 | 39349477 | 39388658 |
| chr1 | 39350784 | 39359264 |
| chr1 | 39350784 | 39372596 |
| chr1 | 39360792 | 39361677 |

|      |          |          |
|------|----------|----------|
| chr1 | 39360792 | 39368314 |
| chr1 | 39385433 | 39388658 |
| chr1 | 39422373 | 39422900 |
| chr1 | 39429241 | 39432654 |
| chr1 | 39434413 | 39439500 |
| chr1 | 39447431 | 39448152 |
| chr1 | 39447431 | 39448763 |
| chr1 | 39451051 | 39460794 |
| chr1 | 39451051 | 39463686 |
| chr1 | 39451051 | 39468732 |
| chr1 | 39459085 | 39462037 |
| chr1 | 39740164 | 39753052 |
| chr1 | 39763091 | 39764817 |
| chr1 | 39847219 | 39857417 |
| chr1 | 39853969 | 39857417 |
| chr1 | 39957086 | 39958825 |
| chr1 | 40059336 | 40061812 |
| chr1 | 40064226 | 40064559 |
| chr1 | 40078559 | 40091399 |
| chr1 | 40091328 | 40092507 |
| chr1 | 40189054 | 40190853 |
| chr1 | 40189054 | 40195764 |
| chr1 | 40189054 | 40202614 |
| chr1 | 40189054 | 40222710 |
| chr1 | 40190771 | 40202614 |
| chr1 | 40260838 | 40268535 |
| chr1 | 40267785 | 40272035 |
| chr1 | 40406735 | 40417096 |
| chr1 | 40413015 | 40417096 |
| chr1 | 40456944 | 40457439 |
| chr1 | 40540585 | 40541710 |
| chr1 | 40641708 | 40647842 |
| chr1 | 40738835 | 40753246 |
| chr1 | 40738835 | 40758294 |
| chr1 | 40747533 | 40753246 |
| chr1 | 40749572 | 40758294 |
| chr1 | 40758120 | 40769415 |
| chr1 | 40983277 | 40984991 |
| chr1 | 40983277 | 40991845 |
| chr1 | 40983277 | 40997526 |
| chr1 | 40983277 | 41002254 |
| chr1 | 40995916 | 41003176 |
| chr1 | 41001028 | 41003176 |
| chr1 | 41001028 | 41006094 |
| chr1 | 41008793 | 41010254 |

|      |          |          |
|------|----------|----------|
| chr1 | 41046406 | 41075451 |
| chr1 | 41070594 | 41075451 |
| chr1 | 41070594 | 41161432 |
| chr1 | 41113282 | 41117010 |
| chr1 | 41113282 | 41143112 |
| chr1 | 41113282 | 41151684 |
| chr1 | 41113282 | 41161432 |
| chr1 | 41113282 | 41186250 |
| chr1 | 41116921 | 41143112 |
| chr1 | 41142877 | 41151684 |
| chr1 | 41575543 | 41628947 |
| chr1 | 42181916 | 42191719 |
| chr1 | 42188736 | 42205863 |
| chr1 | 42188736 | 42278672 |
| chr1 | 42194889 | 42323827 |
| chr1 | 42227882 | 42278672 |
| chr1 | 42227882 | 42311110 |
| chr1 | 42227882 | 42323827 |
| chr1 | 42265114 | 42278672 |
| chr1 | 42265114 | 42311110 |
| chr1 | 42265114 | 42323827 |
| chr1 | 42278347 | 42311110 |
| chr1 | 42278347 | 42323827 |
| chr1 | 42311049 | 42323827 |
| chr1 | 42665979 | 42667440 |
| chr1 | 42754868 | 42755217 |
| chr1 | 42927604 | 42931206 |
| chr1 | 43359166 | 43359638 |
| chr1 | 43425473 | 43426151 |
| chr1 | 43451427 | 43452319 |
| chr1 | 43538197 | 43545166 |
| chr1 | 43538197 | 43553941 |
| chr1 | 43538197 | 43569778 |
| chr1 | 43538197 | 43578920 |
| chr1 | 43538197 | 43609498 |
| chr1 | 43545030 | 43553941 |
| chr1 | 43553491 | 43553941 |
| chr1 | 43553491 | 43569778 |
| chr1 | 43553491 | 43578920 |
| chr1 | 43569589 | 43578920 |
| chr1 | 43578809 | 43589000 |
| chr1 | 43588730 | 43592601 |
| chr1 | 43603415 | 43609498 |
| chr1 | 43613617 | 43617568 |
| chr1 | 43618629 | 43619202 |

|      |          |          |
|------|----------|----------|
| chr1 | 43792101 | 43838311 |
| chr1 | 43814890 | 43858308 |
| chr1 | 43824730 | 43838311 |
| chr1 | 43838218 | 43920928 |
| chr1 | 43894382 | 43899727 |
| chr1 | 43920403 | 43920928 |
| chr1 | 43958241 | 43964321 |
| chr1 | 44247938 | 44319744 |
| chr1 | 44247938 | 44339322 |
| chr1 | 44247938 | 44352925 |
| chr1 | 44284834 | 44319744 |
| chr1 | 44284834 | 44339322 |
| chr1 | 44284834 | 44352925 |
| chr1 | 44308309 | 44319744 |
| chr1 | 44308309 | 44339322 |
| chr1 | 44319627 | 44339322 |
| chr1 | 44319627 | 44352925 |
| chr1 | 44753131 | 44753833 |
| chr1 | 44753732 | 44756237 |
| chr1 | 44753732 | 44762658 |
| chr1 | 44757555 | 44758140 |
| chr1 | 44757555 | 44759348 |
| chr1 | 44757555 | 44760702 |
| chr1 | 44776033 | 44776774 |
| chr1 | 44776033 | 44778129 |
| chr1 | 44874677 | 44880008 |
| chr1 | 45330515 | 45334511 |
| chr1 | 45552435 | 45561878 |
| chr1 | 45566568 | 45567020 |
| chr1 | 45613168 | 45617591 |
| chr1 | 45614095 | 45616393 |
| chr1 | 45615012 | 45616393 |
| chr1 | 45630481 | 45640403 |
| chr1 | 45633488 | 45642499 |
| chr1 | 45633488 | 45655319 |
| chr1 | 45634095 | 45659142 |
| chr1 | 45640209 | 45642499 |
| chr1 | 45640209 | 45661225 |
| chr1 | 45642426 | 45655319 |
| chr1 | 45642426 | 45659142 |
| chr1 | 45654542 | 45655319 |
| chr1 | 45654542 | 45661225 |
| chr1 | 45716894 | 45719340 |
| chr1 | 45824432 | 45882395 |
| chr1 | 45824432 | 45959477 |

|      |          |          |
|------|----------|----------|
| chr1 | 46055794 | 46077613 |
| chr1 | 46055794 | 46080750 |
| chr1 | 46061928 | 46077613 |
| chr1 | 46077514 | 46080750 |
| chr1 | 46258685 | 46261015 |
| chr1 | 46258685 | 46261385 |
| chr1 | 46267458 | 46270785 |
| chr1 | 46279181 | 46281385 |
| chr1 | 46309100 | 46310316 |
| chr1 | 46309896 | 46310316 |
| chr1 | 46562648 | 46572167 |
| chr1 | 46580529 | 46594280 |
| chr1 | 46583227 | 46594280 |
| chr1 | 46652580 | 46658737 |
| chr1 | 46683299 | 46691937 |
| chr1 | 47260288 | 47263113 |
| chr1 | 47269634 | 47272241 |
| chr1 | 47269634 | 47300152 |
| chr1 | 47280240 | 47282459 |
| chr1 | 47280240 | 47301748 |
| chr1 | 47280240 | 47304996 |
| chr1 | 47287550 | 47293544 |
| chr1 | 47287550 | 47295848 |
| chr1 | 47287550 | 47300152 |
| chr1 | 47287550 | 47301748 |
| chr1 | 47287550 | 47302346 |
| chr1 | 47293457 | 47304996 |
| chr1 | 47295764 | 47301748 |
| chr1 | 47295764 | 47304996 |
| chr1 | 47299904 | 47301748 |
| chr1 | 47301560 | 47302346 |
| chr1 | 47301560 | 47304996 |
| chr1 | 47301560 | 47310362 |
| chr1 | 47302233 | 47304996 |
| chr1 | 47368468 | 47373107 |
| chr1 | 47368468 | 47375293 |
| chr1 | 47374908 | 47375293 |
| chr1 | 47408319 | 47409901 |
| chr1 | 48305786 | 48359770 |
| chr1 | 48305786 | 48413151 |
| chr1 | 48355669 | 48359770 |
| chr1 | 48355669 | 48399644 |
| chr1 | 48385308 | 48399644 |
| chr1 | 48385308 | 48403882 |
| chr1 | 48385308 | 48413151 |

|      |          |          |
|------|----------|----------|
| chr1 | 48395266 | 48399644 |
| chr1 | 48395266 | 48403882 |
| chr1 | 48395266 | 48413151 |
| chr1 | 48411463 | 48453131 |
| chr1 | 48451551 | 48453131 |
| chr1 | 50490587 | 50535457 |
| chr1 | 50490587 | 50596216 |
| chr1 | 50535368 | 50567231 |
| chr1 | 50535368 | 50584811 |
| chr1 | 50535368 | 50596216 |
| chr1 | 50535368 | 50655528 |
| chr1 | 50539591 | 50596216 |
| chr1 | 50567076 | 50584811 |
| chr1 | 50567076 | 50596216 |
| chr1 | 50582617 | 50596216 |
| chr1 | 50583651 | 50744775 |
| chr1 | 50596120 | 50744775 |
| chr1 | 50655441 | 50705891 |
| chr1 | 50655441 | 50744775 |
| chr1 | 50705785 | 50738954 |
| chr1 | 50705785 | 50788205 |
| chr1 | 50705785 | 50857997 |
| chr1 | 50738862 | 50788205 |
| chr1 | 50738862 | 50801677 |
| chr1 | 50787999 | 50801677 |
| chr1 | 50787999 | 50857997 |
| chr1 | 51361170 | 51366029 |
| chr1 | 51363865 | 51394447 |
| chr1 | 51365952 | 51400953 |
| chr1 | 51394380 | 51400953 |
| chr1 | 51394380 | 51403532 |
| chr1 | 51399031 | 51402525 |
| chr1 | 51399031 | 51448135 |
| chr1 | 51402434 | 51408332 |
| chr1 | 51402434 | 51465326 |
| chr1 | 51405904 | 51408332 |
| chr1 | 51440346 | 51448135 |
| chr1 | 51461090 | 51465326 |
| chr1 | 51461090 | 51481314 |
| chr1 | 51463672 | 51465326 |
| chr1 | 51714002 | 51750195 |
| chr1 | 51745535 | 51756358 |
| chr1 | 51745535 | 51761971 |
| chr1 | 51745535 | 51765981 |
| chr1 | 51746709 | 51765981 |

|      |          |          |
|------|----------|----------|
| chr1 | 51748368 | 51765981 |
| chr1 | 51750144 | 51765981 |
| chr1 | 51756319 | 51765981 |
| chr1 | 51760689 | 51782643 |
| chr1 | 51772604 | 51782643 |
| chr1 | 51798248 | 51814089 |
| chr1 | 51800555 | 51814089 |
| chr1 | 51810280 | 51816389 |
| chr1 | 51814034 | 51821555 |
| chr1 | 51814034 | 51834170 |
| chr1 | 51814550 | 51819873 |
| chr1 | 51818065 | 51825382 |
| chr1 | 51818065 | 51840514 |
| chr1 | 51819799 | 51823786 |
| chr1 | 51819799 | 51834170 |
| chr1 | 51821497 | 51834170 |
| chr1 | 51823663 | 51827869 |
| chr1 | 51823663 | 51834170 |
| chr1 | 51823663 | 51837620 |
| chr1 | 51827795 | 51834170 |
| chr1 | 51933317 | 51977117 |
| chr1 | 51937293 | 51977117 |
| chr1 | 52023490 | 52028630 |
| chr1 | 52024509 | 52028630 |
| chr1 | 52216368 | 52266831 |
| chr1 | 52233170 | 52239595 |
| chr1 | 52281660 | 52303925 |
| chr1 | 52293452 | 52295977 |
| chr1 | 52332767 | 52337934 |
| chr1 | 52374809 | 52383569 |
| chr1 | 52383419 | 52385949 |
| chr1 | 52396045 | 52397863 |
| chr1 | 52431012 | 52465173 |
| chr1 | 52445786 | 52458449 |
| chr1 | 52445786 | 52461769 |
| chr1 | 52458335 | 52465173 |
| chr1 | 52465069 | 52472102 |
| chr1 | 52477707 | 52481923 |
| chr1 | 52488908 | 52526373 |
| chr1 | 52490731 | 52509712 |
| chr1 | 52493610 | 52497183 |
| chr1 | 52493610 | 52509712 |
| chr1 | 52495426 | 52509712 |
| chr1 | 52515890 | 52526373 |
| chr1 | 52802091 | 52816629 |



|      |          |          |
|------|----------|----------|
| chr1 | 52854464 | 52857749 |
| chr1 | 52854464 | 52860871 |
| chr1 | 52854464 | 52867777 |
| chr1 | 52856997 | 52864157 |
| chr1 | 52856997 | 52867777 |
| chr1 | 52860730 | 52864157 |
| chr1 | 52860730 | 52867777 |
| chr1 | 52877681 | 52881665 |
| chr1 | 52974768 | 52980543 |
| chr1 | 52978216 | 52988136 |
| chr1 | 53014889 | 53039046 |
| chr1 | 53233541 | 53235635 |
| chr1 | 53255116 | 53258471 |
| chr1 | 53266472 | 53271346 |
| chr1 | 53594107 | 53600278 |
| chr1 | 53772328 | 53789196 |
| chr1 | 53772328 | 53793279 |
| chr1 | 53787157 | 53797144 |
| chr1 | 53787157 | 53800848 |
| chr1 | 53787157 | 53806517 |
| chr1 | 53789132 | 53797144 |
| chr1 | 53800692 | 53804009 |
| chr1 | 53800692 | 53832591 |
| chr1 | 53800692 | 53835620 |
| chr1 | 53803927 | 53806517 |
| chr1 | 53803927 | 53809746 |
| chr1 | 53803927 | 53832591 |
| chr1 | 53818970 | 53832591 |
| chr1 | 53825797 | 53832591 |
| chr1 | 53832489 | 53835620 |
| chr1 | 53923903 | 53940097 |
| chr1 | 54036609 | 54047372 |
| chr1 | 54040755 | 54043525 |
| chr1 | 54040755 | 54047372 |
| chr1 | 54195418 | 54196491 |
| chr1 | 54728345 | 54731700 |
| chr1 | 54865302 | 54876047 |
| chr1 | 54871349 | 54876047 |
| chr1 | 54875092 | 54876047 |
| chr1 | 55100838 | 55107430 |
| chr1 | 55123446 | 55134413 |
| chr1 | 58506059 | 58534331 |
| chr1 | 58506059 | 58536741 |
| chr1 | 58527260 | 58536741 |
| chr1 | 58530600 | 58536741 |

|      |          |          |
|------|----------|----------|
| chr1 | 5863889  | 5880239  |
| chr1 | 5865101  | 5866458  |
| chr1 | 58667037 | 58685251 |
| chr1 | 58667846 | 58675580 |
| chr1 | 58671869 | 58677056 |
| chr1 | 58673572 | 58677056 |
| chr1 | 58673572 | 58685251 |
| chr1 | 58681784 | 58685251 |
| chr1 | 58690339 | 58695207 |
| chr1 | 5887285  | 5909213  |
| chr1 | 5887285  | 5986327  |
| chr1 | 5890867  | 5933329  |
| chr1 | 5904616  | 5909213  |
| chr1 | 5904616  | 5933329  |
| chr1 | 5927648  | 5933329  |
| chr1 | 5927648  | 5952836  |
| chr1 | 5927648  | 5961949  |
| chr1 | 5927648  | 5986327  |
| chr1 | 59321535 | 59340069 |
| chr1 | 59321535 | 59346398 |
| chr1 | 59321535 | 59378837 |
| chr1 | 59321535 | 59457076 |
| chr1 | 59339957 | 59346398 |
| chr1 | 59339957 | 59378837 |
| chr1 | 59346246 | 59378837 |
| chr1 | 5947103  | 5952836  |
| chr1 | 5947103  | 5961949  |
| chr1 | 5947103  | 5986327  |
| chr1 | 5952699  | 5986327  |
| chr1 | 59554123 | 59607910 |
| chr1 | 5961793  | 5969259  |
| chr1 | 5961793  | 5986327  |
| chr1 | 5967298  | 5986327  |
| chr1 | 5978269  | 5986327  |
| chr1 | 61277519 | 61359274 |
| chr1 | 61332511 | 61359274 |
| chr1 | 61352449 | 61359274 |
| chr1 | 61383236 | 61406727 |
| chr1 | 61683416 | 61694770 |
| chr1 | 61762857 | 61763179 |
| chr1 | 61762857 | 61775334 |
| chr1 | 61791347 | 61808530 |
| chr1 | 61827421 | 61884408 |
| chr1 | 61827421 | 61927829 |
| chr1 | 61833653 | 61884408 |

|      |          |          |
|------|----------|----------|
| chr1 | 61856029 | 61901459 |
| chr1 | 61899582 | 61901459 |
| chr1 | 6192929  | 6197756  |
| chr1 | 61990167 | 62038049 |
| chr1 | 61990167 | 62051058 |
| chr1 | 61990167 | 62084648 |
| chr1 | 62017855 | 62084648 |
| chr1 | 62114052 | 62123058 |
| chr1 | 62123020 | 62128945 |
| chr1 | 6231901  | 6233643  |
| chr1 | 6231901  | 6234974  |
| chr1 | 62439798 | 62443319 |
| chr1 | 62441487 | 62442299 |
| chr1 | 62444737 | 62448666 |
| chr1 | 62473981 | 62504782 |
| chr1 | 62488933 | 62492847 |
| chr1 | 62504629 | 62513898 |
| chr1 | 62537890 | 62539892 |
| chr1 | 62537890 | 62552901 |
| chr1 | 62555824 | 62578966 |
| chr1 | 62577261 | 62578966 |
| chr1 | 62577261 | 62586624 |
| chr1 | 62577261 | 62625401 |
| chr1 | 62586506 | 62663130 |
| chr1 | 62618705 | 62625401 |
| chr1 | 62618705 | 62663130 |
| chr1 | 62647690 | 62663130 |
| chr1 | 62653724 | 62663130 |
| chr1 | 62803718 | 62816808 |
| chr1 | 62803718 | 62821209 |
| chr1 | 62803718 | 62834852 |
| chr1 | 62803718 | 62841547 |
| chr1 | 6281101  | 6294980  |
| chr1 | 62816574 | 62821209 |
| chr1 | 62829039 | 62841547 |
| chr1 | 6318491  | 6333568  |
| chr1 | 6318491  | 6349866  |
| chr1 | 6327298  | 6349866  |
| chr1 | 6333476  | 6349866  |
| chr1 | 63411925 | 63428801 |
| chr1 | 63453917 | 63454968 |
| chr1 | 63453917 | 63490218 |
| chr1 | 63478763 | 63490218 |
| chr1 | 63478763 | 63508570 |
| chr1 | 63525571 | 63534216 |

|      |          |          |
|------|----------|----------|
| chr1 | 63532669 | 63534216 |
| chr1 | 63545915 | 63555515 |
| chr1 | 63629424 | 63654466 |
| chr1 | 63651668 | 63654466 |
| chr1 | 64009304 | 64050716 |
| chr1 | 64049690 | 64050716 |
| chr1 | 64550593 | 64602912 |
| chr1 | 64602805 | 64641969 |
| chr1 | 64629354 | 64634260 |
| chr1 | 64629354 | 64641969 |
| chr1 | 64663694 | 64664679 |
| chr1 | 64666056 | 64675983 |
| chr1 | 64673347 | 64675561 |
| chr1 | 6469041  | 6469676  |
| chr1 | 64777622 | 64781571 |
| chr1 | 64777622 | 64789514 |
| chr1 | 64777622 | 64814840 |
| chr1 | 64812737 | 64814840 |
| chr1 | 64873369 | 64886341 |
| chr1 | 6528993  | 6532760  |
| chr1 | 6531967  | 6533441  |
| chr1 | 6531967  | 6541927  |
| chr1 | 6533279  | 6549698  |
| chr1 | 65364634 | 65366196 |
| chr1 | 65364634 | 65384326 |
| chr1 | 65364634 | 65395032 |
| chr1 | 6541829  | 6549698  |
| chr1 | 6549570  | 6550615  |
| chr1 | 6595484  | 6599452  |
| chr1 | 6616756  | 6620337  |
| chr1 | 6667708  | 6681037  |
| chr1 | 66891153 | 66905375 |
| chr1 | 66940027 | 66958220 |
| chr1 | 66940027 | 66959743 |
| chr1 | 66940027 | 66963160 |
| chr1 | 66946149 | 66958220 |
| chr1 | 66970807 | 66976722 |
| chr1 | 67020368 | 67047367 |
| chr1 | 67420008 | 67425223 |
| chr1 | 67424199 | 67426285 |
| chr1 | 68137779 | 68148660 |
| chr1 | 68137779 | 68155260 |
| chr1 | 6820180  | 6825210  |
| chr1 | 70148486 | 70159438 |
| chr1 | 70173464 | 70189273 |

|      |          |          |
|------|----------|----------|
| chr1 | 70184784 | 70189273 |
| chr1 | 70187264 | 70189273 |
| chr1 | 70221614 | 70228555 |
| chr1 | 70221614 | 70237552 |
| chr1 | 70228421 | 70239520 |
| chr1 | 70239438 | 70244815 |
| chr1 | 70270855 | 70276844 |
| chr1 | 70270855 | 70306290 |
| chr1 | 70274719 | 70292549 |
| chr1 | 70274719 | 70306290 |
| chr1 | 70276764 | 70315566 |
| chr1 | 70292387 | 70300908 |
| chr1 | 70292387 | 70306290 |
| chr1 | 70292387 | 70315566 |
| chr1 | 70292387 | 70324957 |
| chr1 | 70296129 | 70306290 |
| chr1 | 70296129 | 70315566 |
| chr1 | 70300763 | 70313790 |
| chr1 | 70300763 | 70315566 |
| chr1 | 70306223 | 70324957 |
| chr1 | 74710097 | 74719372 |
| chr1 | 75728400 | 75734871 |
| chr1 | 75732643 | 75733628 |
| chr1 | 75732643 | 75734871 |
| chr1 | 75732643 | 75750546 |
| chr1 | 75739979 | 75750546 |
| chr1 | 75745805 | 75750546 |
| chr1 | 75749418 | 75750546 |
| chr1 | 75787496 | 75789356 |
| chr1 | 75787496 | 75791571 |
| chr1 | 75790151 | 75790517 |
| chr1 | 75803730 | 75816546 |
| chr1 | 77122274 | 77169395 |
| chr1 | 77122274 | 77210489 |
| chr1 | 77154448 | 77169395 |
| chr1 | 77154448 | 77210489 |
| chr1 | 77576067 | 77579628 |
| chr1 | 77580997 | 77582126 |
| chr1 | 77631849 | 77641655 |
| chr1 | 77639448 | 77641655 |
| chr1 | 77641383 | 77641655 |
| chr1 | 77701368 | 77713281 |
| chr1 | 77711746 | 77714783 |
| chr1 | 77711746 | 77715868 |
| chr1 | 77725621 | 77739417 |

|      |          |          |
|------|----------|----------|
| chr1 | 77728294 | 77736158 |
| chr1 | 77734346 | 77736158 |
| chr1 | 77734346 | 77739417 |
| chr1 | 77734346 | 77741748 |
| chr1 | 77736055 | 77741748 |
| chr1 | 77739264 | 77741748 |
| chr1 | 77740876 | 77741748 |
| chr1 | 7777159  | 7778169  |
| chr1 | 77783237 | 77807101 |
| chr1 | 77783237 | 77843407 |
| chr1 | 77801330 | 77807101 |
| chr1 | 77801330 | 77815231 |
| chr1 | 77801330 | 77843407 |
| chr1 | 77801330 | 77859056 |
| chr1 | 77801330 | 77861322 |
| chr1 | 77801330 | 77864028 |
| chr1 | 77801330 | 77866391 |
| chr1 | 77801330 | 77873120 |
| chr1 | 77803269 | 77807101 |
| chr1 | 77803269 | 77813867 |
| chr1 | 77803269 | 77815231 |
| chr1 | 77813733 | 77866391 |
| chr1 | 77843306 | 77864028 |
| chr1 | 77843306 | 77866391 |
| chr1 | 77858937 | 77861322 |
| chr1 | 77858937 | 77864028 |
| chr1 | 77858937 | 77866391 |
| chr1 | 77949154 | 77962930 |
| chr1 | 77955254 | 77956700 |
| chr1 | 77956571 | 77963715 |
| chr1 | 77964645 | 77968203 |
| chr1 | 7962762  | 7970963  |
| chr1 | 83890320 | 83906463 |
| chr1 | 83904078 | 83933766 |
| chr1 | 83917603 | 83921394 |
| chr1 | 84179176 | 84185182 |
| chr1 | 84179176 | 84214317 |
| chr1 | 84196615 | 84197824 |
| chr1 | 8422726  | 8541318  |
| chr1 | 84563256 | 84570720 |
| chr1 | 84655831 | 84671308 |
| chr1 | 8465924  | 8541318  |
| chr1 | 8465924  | 8557523  |
| chr1 | 8465924  | 8614686  |
| chr1 | 84669680 | 84671308 |

|      |          |          |
|------|----------|----------|
| chr1 | 84937754 | 84952530 |
| chr1 | 84937754 | 84965708 |
| chr1 | 84947032 | 84965708 |
| chr1 | 8495062  | 8497529  |
| chr1 | 8495062  | 8508675  |
| chr1 | 8495062  | 8541318  |
| chr1 | 8495062  | 8557523  |
| chr1 | 8495062  | 8614686  |
| chr1 | 8495062  | 8624380  |
| chr1 | 84952242 | 84965708 |
| chr1 | 84958528 | 84965708 |
| chr1 | 8508626  | 8557523  |
| chr1 | 8508626  | 8614686  |
| chr1 | 8508626  | 8624380  |
| chr1 | 85164525 | 85178272 |
| chr1 | 85169043 | 85178272 |
| chr1 | 85182097 | 85190752 |
| chr1 | 85350414 | 85358847 |
| chr1 | 8541213  | 8557523  |
| chr1 | 8541213  | 8614686  |
| chr1 | 8541213  | 8624380  |
| chr1 | 8556474  | 8624380  |
| chr1 | 8614560  | 8624380  |
| chr1 | 86352858 | 86376418 |
| chr1 | 86371017 | 86385590 |
| chr1 | 86372430 | 86383196 |
| chr1 | 86372430 | 86384801 |
| chr1 | 8655972  | 8792588  |
| chr1 | 86715723 | 86719635 |
| chr1 | 86715723 | 86722673 |
| chr1 | 86715723 | 86735179 |
| chr1 | 86719506 | 86724405 |
| chr1 | 86722539 | 86735179 |
| chr1 | 87072933 | 87084279 |
| chr1 | 87072933 | 87092669 |
| chr1 | 87097837 | 87103589 |
| chr1 | 87339535 | 87340202 |
| chr1 | 8862886  | 8864092  |
| chr1 | 8862886  | 8867250  |
| chr1 | 8866278  | 8867250  |
| chr1 | 88740987 | 88760376 |
| chr1 | 88740987 | 88771879 |
| chr1 | 88740987 | 88805671 |
| chr1 | 88760221 | 88771879 |
| chr1 | 88760221 | 88786213 |

|      |          |          |
|------|----------|----------|
| chr1 | 88770351 | 88786213 |
| chr1 | 88771420 | 88786213 |
| chr1 | 88771420 | 88805671 |
| chr1 | 88784638 | 88786213 |
| chr1 | 88786103 | 88806017 |
| chr1 | 88786103 | 88822003 |
| chr1 | 88804390 | 88813733 |
| chr1 | 88807312 | 88822003 |
| chr1 | 88857205 | 88860286 |
| chr1 | 89010903 | 89015414 |
| chr1 | 89058840 | 89060324 |
| chr1 | 90005132 | 90007750 |
| chr1 | 91734775 | 91758750 |
| chr1 | 92088697 | 92102669 |
| chr1 | 92088697 | 92129776 |
| chr1 | 92247061 | 92264638 |
| chr1 | 92262862 | 92271652 |
| chr1 | 92286489 | 92291537 |
| chr1 | 92297403 | 92298029 |
| chr1 | 92307187 | 92345914 |
| chr1 | 92320598 | 92324375 |
| chr1 | 92323444 | 92336427 |
| chr1 | 92323444 | 92345914 |
| chr1 | 92333390 | 92345914 |
| chr1 | 92333390 | 92380873 |
| chr1 | 9244924  | 9247083  |
| chr1 | 9244924  | 9262328  |
| chr1 | 92563641 | 92605402 |
| chr1 | 92563641 | 92607727 |
| chr1 | 92563641 | 92636336 |
| chr1 | 92563641 | 92704744 |
| chr1 | 925921   | 931089   |
| chr1 | 92605306 | 92607727 |
| chr1 | 92605306 | 92624334 |
| chr1 | 92605306 | 92625934 |
| chr1 | 92605306 | 92636336 |
| chr1 | 92605306 | 92704744 |
| chr1 | 92624175 | 92636336 |
| chr1 | 92663419 | 92704744 |
| chr1 | 92665938 | 92693899 |
| chr1 | 92665938 | 92695453 |
| chr1 | 92665938 | 92704744 |
| chr1 | 92677157 | 92704744 |
| chr1 | 92693801 | 92697985 |
| chr1 | 92693801 | 92704744 |



|      |          |          |
|------|----------|----------|
| chr1 | 92693801 | 92736627 |
| chr1 | 92697859 | 92704744 |
| chr1 | 92702140 | 92704744 |
| chr1 | 92702140 | 92736627 |
| chr1 | 92833388 | 92834913 |
| chr1 | 92833388 | 92837633 |
| chr1 | 92834778 | 92837633 |
| chr1 | 930154   | 931089   |
| chr1 | 93114687 | 93115618 |
| chr1 | 93120548 | 93134195 |
| chr1 | 93127231 | 93129448 |
| chr1 | 93156299 | 93160226 |
| chr1 | 93183359 | 93192106 |
| chr1 | 93183359 | 93193744 |
| chr1 | 93183359 | 93201988 |
| chr1 | 93186344 | 93193744 |
| chr1 | 93210801 | 93214966 |
| chr1 | 93210801 | 93216746 |
| chr1 | 93210801 | 93217869 |
| chr1 | 93212100 | 93216746 |
| chr1 | 93212100 | 93217869 |
| chr1 | 93212100 | 93226449 |
| chr1 | 93221608 | 93221936 |
| chr1 | 93226332 | 93232593 |
| chr1 | 93256334 | 93258885 |
| chr1 | 93256334 | 93264901 |
| chr1 | 93324634 | 93325895 |
| chr1 | 93324634 | 93339536 |
| chr1 | 93324634 | 93340510 |
| chr1 | 93499467 | 93524323 |
| chr1 | 93499467 | 93530883 |
| chr1 | 93567278 | 93567851 |
| chr1 | 93567278 | 93576129 |
| chr1 | 93571669 | 93576129 |
| chr1 | 93571669 | 93584121 |
| chr1 | 935771   | 939460   |
| chr1 | 93582300 | 93584121 |
| chr1 | 93582300 | 93592393 |
| chr1 | 93642303 | 93674941 |
| chr1 | 93894613 | 93897898 |
| chr1 | 93894613 | 93901669 |
| chr1 | 93894613 | 93904588 |
| chr1 | 93896617 | 93904588 |
| chr1 | 94177611 | 94184288 |
| chr1 | 94177611 | 94190083 |

|      |          |          |
|------|----------|----------|
| chr1 | 94201719 | 94220392 |
| chr1 | 94201719 | 94231643 |
| chr1 | 94203929 | 94205683 |
| chr1 | 94220257 | 94231643 |
| chr1 | 94458606 | 94468007 |
| chr1 | 94458606 | 94480606 |
| chr1 | 94458606 | 94491247 |
| chr1 | 94464774 | 94475737 |
| chr1 | 94464774 | 94480606 |
| chr1 | 94480463 | 94491247 |
| chr1 | 94483169 | 94491247 |
| chr1 | 94487541 | 94491247 |
| chr1 | 94498601 | 94499614 |
| chr1 | 94498782 | 94506642 |
| chr1 | 95143890 | 95151419 |
| chr1 | 95143890 | 95173889 |
| chr1 | 9553625  | 9573412  |
| chr1 | 9553625  | 9580234  |
| chr1 | 955922   | 957025   |
| chr1 | 955922   | 957273   |
| chr1 | 9595889  | 9598625  |
| chr1 | 96751424 | 96777946 |
| chr1 | 96751424 | 96785254 |
| chr1 | 96769702 | 96770851 |
| chr1 | 96769702 | 96777946 |
| chr1 | 9743883  | 9744643  |
| chr1 | 97450058 | 97515941 |
| chr1 | 97515725 | 97549744 |
| chr1 | 97515725 | 97595166 |
| chr1 | 97515725 | 97699547 |
| chr1 | 97549559 | 97573970 |
| chr1 | 9755113  | 9773394  |
| chr1 | 97573759 | 97595166 |
| chr1 | 97679094 | 97699547 |
| chr1 | 97679094 | 97740479 |
| chr1 | 97691716 | 97740479 |
| chr1 | 98684884 | 98698905 |
| chr1 | 98684884 | 98738389 |
| chr1 | 98691074 | 98701903 |
| chr1 | 98691074 | 98738389 |
| chr1 | 9931890  | 9932898  |
| chr1 | 9931890  | 9934860  |
| chr1 | 9931890  | 9935627  |
| chr1 | 9931890  | 9936627  |
| chr1 | 9972017  | 9975775  |

|       |          |           |
|-------|----------|-----------|
| chr1  | 9972017  | 9981170   |
| chr1  | 99728492 | 99738268  |
| chr1  | 99740792 | 99749001  |
| chr1  | 99747293 | 99749001  |
| chr1  | 99874686 | 99902794  |
| chr1  | 99910711 | 99916731  |
| chr1  | 99993536 | 99999415  |
| chr1  | 99999260 | 100017815 |
| chr20 | 10556230 | 10560820  |
| chr20 | 1125497  | 1135306   |
| chr20 | 13270503 | 13279898  |
| chr20 | 13417447 | 13534141  |
| chr20 | 13417447 | 13587370  |
| chr20 | 13483226 | 13569586  |
| chr20 | 13483226 | 13587370  |
| chr20 | 13483226 | 13630152  |
| chr20 | 13528432 | 13534141  |
| chr20 | 13528432 | 13559114  |
| chr20 | 13528432 | 13569586  |
| chr20 | 13528432 | 13580981  |
| chr20 | 13559007 | 13569586  |
| chr20 | 13559007 | 13580981  |
| chr20 | 13559007 | 13587370  |
| chr20 | 13559007 | 13630152  |
| chr20 | 13569506 | 13587370  |
| chr20 | 13569506 | 13630152  |
| chr20 | 13580896 | 13630152  |
| chr20 | 13587249 | 13630152  |
| chr20 | 13623445 | 13630152  |
| chr20 | 1372075  | 1375603   |
| chr20 | 1445665  | 1453140   |
| chr20 | 1452492  | 1453140   |
| chr20 | 1452492  | 1455132   |
| chr20 | 1452492  | 1458274   |
| chr20 | 16427103 | 16429982  |
| chr20 | 16494290 | 16515664  |
| chr20 | 16507957 | 16528440  |
| chr20 | 16526091 | 16528440  |
| chr20 | 17943109 | 17950207  |
| chr20 | 17943109 | 17954117  |
| chr20 | 17947485 | 17951595  |
| chr20 | 17947485 | 17957037  |
| chr20 | 17949063 | 17957037  |
| chr20 | 17950131 | 17957037  |
| chr20 | 17951499 | 17957037  |

|       |          |          |
|-------|----------|----------|
| chr20 | 17952586 | 17954117 |
| chr20 | 17952586 | 17955475 |
| chr20 | 17952586 | 17957037 |
| chr20 | 17955364 | 17957037 |
| chr20 | 18297984 | 18306393 |
| chr20 | 18298288 | 18306393 |
| chr20 | 18305007 | 18306393 |
| chr20 | 18389700 | 18398626 |
| chr20 | 18412645 | 18415449 |
| chr20 | 18412645 | 18427159 |
| chr20 | 18433651 | 18449069 |
| chr20 | 18480037 | 18481810 |
| chr20 | 18510821 | 18512282 |
| chr20 | 18510821 | 18515736 |
| chr20 | 18510821 | 18532744 |
| chr20 | 18510821 | 18535742 |
| chr20 | 18524432 | 18530803 |
| chr20 | 18527495 | 18535742 |
| chr20 | 18527495 | 18542402 |
| chr20 | 18532663 | 18542402 |
| chr20 | 18543018 | 18548770 |
| chr20 | 18543018 | 18551175 |
| chr20 | 18543018 | 18554390 |
| chr20 | 18551088 | 18554390 |
| chr20 | 18593730 | 18596241 |
| chr20 | 1895438  | 1915455  |
| chr20 | 19935098 | 19960811 |
| chr20 | 19935098 | 19975787 |
| chr20 | 19956614 | 19960811 |
| chr20 | 19970837 | 19975787 |
| chr20 | 19970837 | 19992299 |
| chr20 | 19990005 | 19992299 |
| chr20 | 19990005 | 19996842 |
| chr20 | 19992167 | 19996842 |
| chr20 | 20520916 | 20536784 |
| chr20 | 20531686 | 20546832 |
| chr20 | 20616042 | 20620630 |
| chr20 | 20635417 | 20680801 |
| chr20 | 20639784 | 20653587 |
| chr20 | 20653529 | 20680801 |
| chr20 | 21132096 | 21163159 |
| chr20 | 21136389 | 21163159 |
| chr20 | 21145564 | 21215648 |
| chr20 | 21161870 | 21163159 |
| chr20 | 21214534 | 21229115 |

|       |          |          |
|-------|----------|----------|
| chr20 | 21214534 | 21232830 |
| chr20 | 21214534 | 21244288 |
| chr20 | 21326278 | 21328670 |
| chr20 | 21326278 | 21334185 |
| chr20 | 21326278 | 21349461 |
| chr20 | 21326278 | 21357792 |
| chr20 | 21326489 | 21330539 |
| chr20 | 21326489 | 21333994 |
| chr20 | 21332282 | 21333837 |
| chr20 | 21339043 | 21344208 |
| chr20 | 21339043 | 21346550 |
| chr20 | 21340720 | 21346550 |
| chr20 | 21346414 | 21356177 |
| chr20 | 21348145 | 21349461 |
| chr20 | 21348340 | 21356177 |
| chr20 | 21354788 | 21368590 |
| chr20 | 21365420 | 21368590 |
| chr20 | 21365420 | 21382057 |
| chr20 | 23389945 | 23403072 |
| chr20 | 2492698  | 2494044  |
| chr20 | 2492698  | 2500742  |
| chr20 | 24968891 | 24973737 |
| chr20 | 24968891 | 24978882 |
| chr20 | 24969525 | 24973737 |
| chr20 | 24969525 | 24984019 |
| chr20 | 24978766 | 24984019 |
| chr20 | 25021388 | 25023641 |
| chr20 | 25030758 | 25048181 |
| chr20 | 25209848 | 25213406 |
| chr20 | 25209848 | 25218614 |
| chr20 | 25302218 | 25309575 |
| chr20 | 25306832 | 25317078 |
| chr20 | 25307965 | 25309575 |
| chr20 | 25314924 | 25320318 |
| chr20 | 25323324 | 25339351 |
| chr20 | 25413789 | 25418195 |
| chr20 | 25413789 | 25425327 |
| chr20 | 25413789 | 25441776 |
| chr20 | 25417103 | 25425327 |
| chr20 | 25418104 | 25425327 |
| chr20 | 25418104 | 25441776 |
| chr20 | 25455672 | 25462541 |
| chr20 | 25461521 | 25470095 |
| chr20 | 25489243 | 25491525 |
| chr20 | 25489243 | 25496803 |

|       |          |          |
|-------|----------|----------|
| chr20 | 25489243 | 25526598 |
| chr20 | 25517752 | 25526598 |
| chr20 | 25632157 | 25634170 |
| chr20 | 25632157 | 25634827 |
| chr20 | 25634048 | 25634827 |
| chr20 | 25685566 | 25686466 |
| chr20 | 26018831 | 26019202 |
| chr20 | 26018831 | 26019924 |
| chr20 | 2655324  | 2656214  |
| chr20 | 2663445  | 2664005  |
| chr20 | 28583018 | 28591519 |
| chr20 | 28590556 | 28591519 |
| chr20 | 2923206  | 2965202  |
| chr20 | 2923206  | 2988474  |
| chr20 | 2947981  | 2965202  |
| chr20 | 2964271  | 2965202  |
| chr20 | 2964271  | 2988474  |
| chr20 | 2986764  | 2988474  |
| chr20 | 2986764  | 3007420  |
| chr20 | 30388452 | 30393655 |
| chr20 | 30388452 | 30398045 |
| chr20 | 31544946 | 31550121 |
| chr20 | 31550063 | 31561736 |
| chr20 | 31742540 | 31766682 |
| chr20 | 31757406 | 31760179 |
| chr20 | 31757406 | 31766682 |
| chr20 | 31757406 | 31771682 |
| chr20 | 31770342 | 31778984 |
| chr20 | 31778812 | 31782390 |
| chr20 | 31782248 | 31797515 |
| chr20 | 31792734 | 31794548 |
| chr20 | 31792734 | 31798552 |
| chr20 | 3191764  | 3203416  |
| chr20 | 3200000  | 3203416  |
| chr20 | 32133012 | 32143105 |
| chr20 | 32133012 | 32146855 |
| chr20 | 32141496 | 32143105 |
| chr20 | 32155102 | 32158514 |
| chr20 | 32215268 | 32216721 |
| chr20 | 32316217 | 32316874 |
| chr20 | 32366383 | 32369123 |
| chr20 | 32366383 | 32428422 |
| chr20 | 32453303 | 32453761 |
| chr20 | 32704022 | 32728142 |
| chr20 | 3270426  | 3287790  |

|       |          |          |
|-------|----------|----------|
| chr20 | 32780317 | 32789012 |
| chr20 | 32784757 | 32792770 |
| chr20 | 32788853 | 32792770 |
| chr20 | 3278911  | 3290217  |
| chr20 | 32791600 | 32792770 |
| chr20 | 32795408 | 32797299 |
| chr20 | 32795408 | 32799328 |
| chr20 | 32825924 | 32833862 |
| chr20 | 32825924 | 32836841 |
| chr20 | 32825924 | 32839856 |
| chr20 | 32825924 | 32846770 |
| chr20 | 3290128  | 3294629  |
| chr20 | 3315032  | 3318400  |
| chr20 | 3322216  | 3343731  |
| chr20 | 3330645  | 3348623  |
| chr20 | 33366858 | 33370629 |
| chr20 | 33366858 | 33379691 |
| chr20 | 33372641 | 33379691 |
| chr20 | 33379460 | 33385770 |
| chr20 | 33379460 | 33397084 |
| chr20 | 33385649 | 33392242 |
| chr20 | 33392141 | 33397084 |
| chr20 | 33394031 | 33397084 |
| chr20 | 33606955 | 33625017 |
| chr20 | 33619516 | 33623296 |
| chr20 | 33619516 | 33628435 |
| chr20 | 33619516 | 33629914 |
| chr20 | 33619516 | 33640531 |
| chr20 | 33628349 | 33629914 |
| chr20 | 33628349 | 33636708 |
| chr20 | 33636639 | 33640531 |
| chr20 | 33740901 | 33762055 |
| chr20 | 33740901 | 33767041 |
| chr20 | 33766850 | 33770292 |
| chr20 | 33766850 | 33783864 |
| chr20 | 33783731 | 33789588 |
| chr20 | 34031521 | 34072330 |
| chr20 | 34072065 | 34073866 |
| chr20 | 34072065 | 34076815 |
| chr20 | 34072065 | 34077245 |
| chr20 | 34072065 | 34078553 |
| chr20 | 34093674 | 34098633 |
| chr20 | 34096656 | 34098633 |
| chr20 | 34096656 | 34103565 |
| chr20 | 34096656 | 34105545 |

|       |          |          |
|-------|----------|----------|
| chr20 | 34098497 | 34103565 |
| chr20 | 34290331 | 34294156 |
| chr20 | 34290331 | 34295585 |
| chr20 | 34369393 | 34413879 |
| chr20 | 34369393 | 34424525 |
| chr20 | 34408650 | 34424525 |
| chr20 | 34412514 | 34413879 |
| chr20 | 34413741 | 34449480 |
| chr20 | 34413741 | 34489926 |
| chr20 | 34424479 | 34438631 |
| chr20 | 34424479 | 34440344 |
| chr20 | 34424479 | 34462221 |
| chr20 | 34424479 | 34471515 |
| chr20 | 34438473 | 34440344 |
| chr20 | 34438473 | 34442303 |
| chr20 | 34438473 | 34449480 |
| chr20 | 34438473 | 34462221 |
| chr20 | 34438473 | 34471515 |
| chr20 | 34440154 | 34449480 |
| chr20 | 34440154 | 34457474 |
| chr20 | 34442207 | 34449480 |
| chr20 | 34457389 | 34471515 |
| chr20 | 34462092 | 34479789 |
| chr20 | 34462092 | 34489926 |
| chr20 | 34462092 | 34492597 |
| chr20 | 34470047 | 34479789 |
| chr20 | 34470047 | 34481206 |
| chr20 | 34470047 | 34492597 |
| chr20 | 34471443 | 34481206 |
| chr20 | 34471443 | 34492597 |
| chr20 | 34477771 | 34479789 |
| chr20 | 34477771 | 34480732 |
| chr20 | 34480598 | 34481206 |
| chr20 | 34489265 | 34489926 |
| chr20 | 34489265 | 34492597 |
| chr20 | 34489265 | 34504403 |
| chr20 | 34519419 | 34534795 |
| chr20 | 34575103 | 34588607 |
| chr20 | 34634614 | 34644226 |
| chr20 | 34634614 | 34645334 |
| chr20 | 34727258 | 34736758 |
| chr20 | 34768463 | 34782404 |
| chr20 | 34782120 | 34792563 |
| chr20 | 34854530 | 34854923 |
| chr20 | 34913095 | 34921866 |



|       |          |          |
|-------|----------|----------|
| chr20 | 34931335 | 34937023 |
| chr20 | 34935575 | 34937023 |
| chr20 | 34941712 | 34951860 |
| chr20 | 35013007 | 35021356 |
| chr20 | 35016007 | 35021356 |
| chr20 | 35035122 | 35055031 |
| chr20 | 35044504 | 35057571 |
| chr20 | 35069295 | 35078174 |
| chr20 | 35118597 | 35142478 |
| chr20 | 35123889 | 35126375 |
| chr20 | 35131641 | 35142478 |
| chr20 | 35246839 | 35254754 |
| chr20 | 35246839 | 35269898 |
| chr20 | 35314687 | 35384133 |
| chr20 | 35347163 | 35384133 |
| chr20 | 3535252  | 3540335  |
| chr20 | 3535252  | 3549338  |
| chr20 | 35366556 | 35382025 |
| chr20 | 35366556 | 35384133 |
| chr20 | 35366556 | 35394196 |
| chr20 | 35374183 | 35384133 |
| chr20 | 3540221  | 3549338  |
| chr20 | 3545761  | 3549338  |
| chr20 | 35479230 | 35480145 |
| chr20 | 35501844 | 35505005 |
| chr20 | 35507737 | 35510054 |
| chr20 | 35508942 | 35510054 |
| chr20 | 35547411 | 35548865 |
| chr20 | 35548508 | 35548865 |
| chr20 | 3559392  | 3560905  |
| chr20 | 3562275  | 3565432  |
| chr20 | 35631113 | 35658982 |
| chr20 | 35632310 | 35632696 |
| chr20 | 3565347  | 3572951  |
| chr20 | 35672754 | 35681981 |
| chr20 | 35680736 | 35681981 |
| chr20 | 35680736 | 35690565 |
| chr20 | 35709223 | 35732135 |
| chr20 | 35713018 | 35714389 |
| chr20 | 35713018 | 35725155 |
| chr20 | 35714184 | 35725155 |
| chr20 | 35714184 | 35732135 |
| chr20 | 35716739 | 35725155 |
| chr20 | 35716739 | 35732135 |
| chr20 | 35716739 | 35739017 |

|       |          |          |
|-------|----------|----------|
| chr20 | 35721739 | 35725155 |
| chr20 | 35721739 | 35732135 |
| chr20 | 35721739 | 35734257 |
| chr20 | 35724569 | 35725155 |
| chr20 | 35724569 | 35729527 |
| chr20 | 35724569 | 35732135 |
| chr20 | 35729311 | 35732135 |
| chr20 | 35731940 | 35739017 |
| chr20 | 35801490 | 35842744 |
| chr20 | 35801490 | 35847434 |
| chr20 | 35801490 | 35858381 |
| chr20 | 35801490 | 35863400 |
| chr20 | 35801490 | 35931444 |
| chr20 | 35842572 | 35847434 |
| chr20 | 35842572 | 35858381 |
| chr20 | 35847349 | 35863400 |
| chr20 | 35847349 | 35871829 |
| chr20 | 35858301 | 35863400 |
| chr20 | 35858301 | 35871829 |
| chr20 | 35863012 | 35871829 |
| chr20 | 35863012 | 35899648 |
| chr20 | 35863012 | 35931444 |
| chr20 | 35869437 | 35871829 |
| chr20 | 35871649 | 35917662 |
| chr20 | 35913248 | 35914197 |
| chr20 | 36212271 | 36222394 |
| chr20 | 36496704 | 36500611 |
| chr20 | 36607714 | 36609730 |
| chr20 | 36656359 | 36665301 |
| chr20 | 36656359 | 36666392 |
| chr20 | 36656359 | 36682578 |
| chr20 | 36660336 | 36666392 |
| chr20 | 36660336 | 36671397 |
| chr20 | 36665045 | 36671397 |
| chr20 | 36665045 | 36682578 |
| chr20 | 36665045 | 36688784 |
| chr20 | 36680815 | 36688784 |
| chr20 | 36684412 | 36688784 |
| chr20 | 36687491 | 36688784 |
| chr20 | 36758086 | 36768042 |
| chr20 | 36793248 | 36797573 |
| chr20 | 36802855 | 36805957 |
| chr20 | 36802855 | 36808743 |
| chr20 | 36804734 | 36805957 |
| chr20 | 36829053 | 36839441 |

|       |          |          |
|-------|----------|----------|
| chr20 | 36904156 | 36905503 |
| chr20 | 36911217 | 36912552 |
| chr20 | 36911217 | 36919519 |
| chr20 | 36916721 | 36919519 |
| chr20 | 37007410 | 37020730 |
| chr20 | 37007410 | 37032876 |
| chr20 | 37007410 | 37035508 |
| chr20 | 37007410 | 37040285 |
| chr20 | 37022649 | 37068186 |
| chr20 | 37032664 | 37068186 |
| chr20 | 37040152 | 37047190 |
| chr20 | 37040152 | 37055656 |
| chr20 | 37040152 | 37068186 |
| chr20 | 37044085 | 37047190 |
| chr20 | 37044085 | 37065473 |
| chr20 | 37047052 | 37068186 |
| chr20 | 37056145 | 37062270 |
| chr20 | 37056145 | 37065473 |
| chr20 | 37056145 | 37068186 |
| chr20 | 37061102 | 37062270 |
| chr20 | 37061102 | 37065473 |
| chr20 | 37065423 | 37068186 |
| chr20 | 37066723 | 37068186 |
| chr20 | 37198396 | 37213865 |
| chr20 | 37203884 | 37213865 |
| chr20 | 37207272 | 37210165 |
| chr20 | 37232295 | 37234095 |
| chr20 | 37382618 | 37386174 |
| chr20 | 37386074 | 37393993 |
| chr20 | 37393894 | 37396311 |
| chr20 | 3758535  | 3760186  |
| chr20 | 37732878 | 37842419 |
| chr20 | 37746467 | 37768044 |
| chr20 | 37765196 | 37768044 |
| chr20 | 37765196 | 37779335 |
| chr20 | 37765196 | 37803048 |
| chr20 | 37777344 | 37779335 |
| chr20 | 37777344 | 37803048 |
| chr20 | 38006196 | 38013857 |
| chr20 | 38040434 | 38059520 |
| chr20 | 38040434 | 38066256 |
| chr20 | 38048347 | 38066256 |
| chr20 | 38057531 | 38059520 |
| chr20 | 38057531 | 38066256 |
| chr20 | 38448661 | 38450447 |

|       |          |          |
|-------|----------|----------|
| chr20 | 38488402 | 38493132 |
| chr20 | 38488402 | 38499633 |
| chr20 | 38488402 | 38509208 |
| chr20 | 38488402 | 38518000 |
| chr20 | 38497352 | 38509208 |
| chr20 | 38499446 | 38509208 |
| chr20 | 38524777 | 38532859 |
| chr20 | 38531166 | 38532859 |
| chr20 | 38754956 | 38756039 |
| chr20 | 38765401 | 38767596 |
| chr20 | 38941958 | 38948000 |
| chr20 | 38983698 | 38994880 |
| chr20 | 38988812 | 38994880 |
| chr20 | 39001729 | 39006356 |
| chr20 | 39023689 | 39030775 |
| chr20 | 3907925  | 3910830  |
| chr20 | 3907925  | 3912634  |
| chr20 | 3907925  | 3917050  |
| chr20 | 3907925  | 3918796  |
| chr20 | 3910576  | 3912634  |
| chr20 | 3910576  | 3918796  |
| chr20 | 3912457  | 3918796  |
| chr20 | 3945176  | 3974400  |
| chr20 | 41092471 | 41098337 |
| chr20 | 41092471 | 41100243 |
| chr20 | 41092471 | 41101353 |
| chr20 | 41112781 | 41114155 |
| chr20 | 41133486 | 41135811 |
| chr20 | 41168766 | 41169175 |
| chr20 | 41423491 | 41426153 |
| chr20 | 41437273 | 41440129 |
| chr20 | 41437273 | 41447971 |
| chr20 | 41439999 | 41447971 |
| chr20 | 41447881 | 41457428 |
| chr20 | 41512845 | 41514952 |
| chr20 | 41512845 | 41551360 |
| chr20 | 41533049 | 41551360 |
| chr20 | 417525   | 417930   |
| chr20 | 417525   | 422238   |
| chr20 | 43459770 | 43460598 |
| chr20 | 43594692 | 43613976 |
| chr20 | 43594692 | 43620925 |
| chr20 | 43596434 | 43613976 |
| chr20 | 43613849 | 43620925 |
| chr20 | 43613849 | 43624045 |

|       |          |          |
|-------|----------|----------|
| chr20 | 43620856 | 43642624 |
| chr20 | 43673805 | 43687072 |
| chr20 | 43673805 | 43700044 |
| chr20 | 43686851 | 43700044 |
| chr20 | 43702489 | 43705358 |
| chr20 | 43711487 | 43715283 |
| chr20 | 43973366 | 44006792 |
| chr20 | 44006546 | 44064857 |
| chr20 | 44051305 | 44054526 |
| chr20 | 441587   | 442043   |
| chr20 | 441587   | 448074   |
| chr20 | 44202960 | 44206998 |
| chr20 | 44479984 | 44484530 |
| chr20 | 44479984 | 44486706 |
| chr20 | 44484336 | 44486706 |
| chr20 | 44500257 | 44506996 |
| chr20 | 44503814 | 44504891 |
| chr20 | 44503814 | 44506996 |
| chr20 | 44506826 | 44514040 |
| chr20 | 44509890 | 44511368 |
| chr20 | 44509890 | 44512994 |
| chr20 | 44509890 | 44514040 |
| chr20 | 44511288 | 44514040 |
| chr20 | 44582584 | 44589866 |
| chr20 | 44912659 | 44916871 |
| chr20 | 44916755 | 44919277 |
| chr20 | 44916755 | 44924256 |
| chr20 | 44918905 | 44919277 |
| chr20 | 44921593 | 44924256 |
| chr20 | 44972077 | 44981943 |
| chr20 | 44972077 | 44987296 |
| chr20 | 44972077 | 44995257 |
| chr20 | 44972077 | 45001353 |
| chr20 | 44978442 | 44987296 |
| chr20 | 44978442 | 44997306 |
| chr20 | 44978442 | 45001353 |
| chr20 | 44981828 | 44987296 |
| chr20 | 44995089 | 45001353 |
| chr20 | 44997168 | 45001353 |
| chr20 | 45000391 | 45001353 |
| chr20 | 45000391 | 45025130 |
| chr20 | 45330365 | 45335920 |
| chr20 | 45795344 | 45801458 |
| chr20 | 45950452 | 45952521 |
| chr20 | 46063359 | 46079453 |

|       |          |          |
|-------|----------|----------|
| chr20 | 46068501 | 46079453 |
| chr20 | 46070209 | 46079453 |
| chr20 | 46368890 | 46394532 |
| chr20 | 46374331 | 46393143 |
| chr20 | 46380252 | 46394503 |
| chr20 | 46393092 | 46394503 |
| chr20 | 46393092 | 46398771 |
| chr20 | 46588058 | 46613725 |
| chr20 | 46610445 | 46613725 |
| chr20 | 47227202 | 47236516 |
| chr20 | 47246007 | 47249439 |
| chr20 | 47249286 | 47262428 |
| chr20 | 47262287 | 47276795 |
| chr20 | 47262287 | 47283648 |
| chr20 | 47262287 | 47347926 |
| chr20 | 47276313 | 47283648 |
| chr20 | 47276313 | 47287284 |
| chr20 | 47276313 | 47290274 |
| chr20 | 47276313 | 47347926 |
| chr20 | 47282101 | 47287284 |
| chr20 | 47282101 | 47347926 |
| chr20 | 47294665 | 47298872 |
| chr20 | 47294665 | 47298947 |
| chr20 | 47298728 | 47310204 |
| chr20 | 47623910 | 47633636 |
| chr20 | 47625380 | 47628023 |
| chr20 | 47634047 | 47640051 |
| chr20 | 47635321 | 47637783 |
| chr20 | 47642212 | 47651276 |
| chr20 | 486375   | 492364   |
| chr20 | 48690946 | 48708421 |
| chr20 | 48726289 | 48747880 |
| chr20 | 4883641  | 4884823  |
| chr20 | 4883641  | 4899712  |
| chr20 | 48941198 | 48963898 |
| chr20 | 48951322 | 48952884 |
| chr20 | 48951322 | 48953790 |
| chr20 | 48951322 | 48963898 |
| chr20 | 48952704 | 48963898 |
| chr20 | 48953555 | 48963898 |
| chr20 | 48953555 | 48969277 |
| chr20 | 48971119 | 48985613 |
| chr20 | 48972325 | 48973284 |
| chr20 | 48974765 | 48976199 |
| chr20 | 48976015 | 48985613 |

|       |          |          |
|-------|----------|----------|
| chr20 | 48988303 | 48989684 |
| chr20 | 48998192 | 48998505 |
| chr20 | 48998192 | 49005221 |
| chr20 | 4902441  | 4932716  |
| chr20 | 49058452 | 49067280 |
| chr20 | 49058452 | 49068822 |
| chr20 | 49058452 | 49070297 |
| chr20 | 49063201 | 49067280 |
| chr20 | 49063201 | 49070297 |
| chr20 | 49063201 | 49078622 |
| chr20 | 49066191 | 49066510 |
| chr20 | 49066191 | 49067280 |
| chr20 | 49066191 | 49070297 |
| chr20 | 49066191 | 49072697 |
| chr20 | 49066191 | 49075520 |
| chr20 | 49066191 | 49085386 |
| chr20 | 49067189 | 49070297 |
| chr20 | 49067189 | 49072697 |
| chr20 | 49072285 | 49072697 |
| chr20 | 49072285 | 49074850 |
| chr20 | 49072285 | 49075520 |
| chr20 | 49072285 | 49089746 |
| chr20 | 49072285 | 49092127 |
| chr20 | 49074784 | 49077064 |
| chr20 | 49074784 | 49078622 |
| chr20 | 49074784 | 49089746 |
| chr20 | 49074784 | 49091022 |
| chr20 | 49074784 | 49092127 |
| chr20 | 49076979 | 49091022 |
| chr20 | 49084025 | 49089397 |
| chr20 | 49085282 | 49089397 |
| chr20 | 49088008 | 49089746 |
| chr20 | 49088008 | 49091022 |
| chr20 | 49090741 | 49091022 |
| chr20 | 49090741 | 49094963 |
| chr20 | 49092045 | 49094963 |
| chr20 | 49094139 | 49094963 |
| chr20 | 49115781 | 49124605 |
| chr20 | 49117125 | 49124587 |
| chr20 | 49119981 | 49135931 |
| chr20 | 49135832 | 49154071 |
| chr20 | 49135832 | 49166285 |
| chr20 | 49135832 | 49174269 |
| chr20 | 49151581 | 49154071 |
| chr20 | 49151581 | 49166285 |

|       |          |          |
|-------|----------|----------|
| chr20 | 49151581 | 49174269 |
| chr20 | 49165996 | 49174269 |
| chr20 | 49226429 | 49230349 |
| chr20 | 49233305 | 49233709 |
| chr20 | 49233305 | 49236510 |
| chr20 | 49233305 | 49239338 |
| chr20 | 49241892 | 49242681 |
| chr20 | 49251526 | 49253811 |
| chr20 | 49260462 | 49263483 |
| chr20 | 49263333 | 49266266 |
| chr20 | 49264715 | 49266266 |
| chr20 | 49279103 | 49280964 |
| chr20 | 4932454  | 4970919  |
| chr20 | 49637340 | 49643650 |
| chr20 | 49637340 | 49647078 |
| chr20 | 49637340 | 49656702 |
| chr20 | 49639677 | 49640665 |
| chr20 | 49839540 | 49855581 |
| chr20 | 49839540 | 49864844 |
| chr20 | 49849578 | 49855581 |
| chr20 | 49855437 | 49864844 |
| chr20 | 49855437 | 49874821 |
| chr20 | 49941560 | 49949355 |
| chr20 | 49945381 | 49949355 |
| chr20 | 50127974 | 50130947 |
| chr20 | 50561362 | 50574654 |
| chr20 | 50574516 | 50579329 |
| chr20 | 50902016 | 50904001 |
| chr20 | 50902016 | 50904849 |
| chr20 | 50940864 | 50955285 |
| chr20 | 50942030 | 50955285 |
| chr20 | 50945846 | 50955285 |
| chr20 | 5106187  | 5109445  |
| chr20 | 51473979 | 51475660 |
| chr20 | 51516783 | 51523596 |
| chr20 | 51604816 | 51610165 |
| chr20 | 51613676 | 51619043 |
| chr20 | 51617489 | 51619043 |
| chr20 | 51639342 | 51690819 |
| chr20 | 51639342 | 51697482 |
| chr20 | 51656937 | 51671257 |
| chr20 | 51656937 | 51690819 |
| chr20 | 51669996 | 51690819 |
| chr20 | 51669996 | 51697482 |
| chr20 | 51674152 | 51676208 |



|       |          |          |
|-------|----------|----------|
| chr20 | 51674152 | 51689139 |
| chr20 | 51674152 | 51690819 |
| chr20 | 51674152 | 51697482 |
| chr20 | 51690738 | 51697482 |
| chr20 | 51694007 | 51697482 |
| chr20 | 51712965 | 51729978 |
| chr20 | 51725818 | 51729978 |
| chr20 | 5173522  | 5178956  |
| chr20 | 5173522  | 5183143  |
| chr20 | 5175182  | 5178956  |
| chr20 | 52088391 | 52098587 |
| chr20 | 52097372 | 52098587 |
| chr20 | 52160122 | 52187065 |
| chr20 | 54157168 | 54169688 |
| chr20 | 54157168 | 54171670 |
| chr20 | 5575815  | 5580131  |
| chr20 | 56370484 | 56383176 |
| chr20 | 56370484 | 56388202 |
| chr20 | 56373407 | 56386533 |
| chr20 | 56373407 | 56388202 |
| chr20 | 56381432 | 56384324 |
| chr20 | 56381432 | 56386533 |
| chr20 | 56381432 | 56388202 |
| chr20 | 56381432 | 56390665 |
| chr20 | 56382984 | 56386533 |
| chr20 | 56382984 | 56388202 |
| chr20 | 56386256 | 56388202 |
| chr20 | 56388686 | 56390665 |
| chr20 | 56395520 | 56397841 |
| chr20 | 56473300 | 56477124 |
| chr20 | 56473300 | 56484189 |
| chr20 | 56474677 | 56477124 |
| chr20 | 56631204 | 56634268 |
| chr20 | 58418210 | 58434705 |
| chr20 | 58418210 | 58439025 |
| chr20 | 58418210 | 58441083 |
| chr20 | 58434601 | 58441083 |
| chr20 | 58438944 | 58441083 |
| chr20 | 58667489 | 58671297 |
| chr20 | 58667489 | 58673711 |
| chr20 | 58667986 | 58673711 |
| chr20 | 58895611 | 58905480 |
| chr20 | 58895611 | 58909579 |
| chr20 | 58988913 | 58989640 |
| chr20 | 5941950  | 5943683  |

|       |          |          |
|-------|----------|----------|
| chr20 | 5952010  | 5952528  |
| chr20 | 5952010  | 5957229  |
| chr20 | 5958527  | 5963359  |
| chr20 | 5958527  | 5968025  |
| chr20 | 5958527  | 5972037  |
| chr20 | 5958527  | 5973196  |
| chr20 | 5958527  | 5978017  |
| chr20 | 5958527  | 5983165  |
| chr20 | 5958527  | 5985000  |
| chr20 | 5967435  | 5968025  |
| chr20 | 5973055  | 5983165  |
| chr20 | 5984780  | 5986131  |
| chr20 | 6085065  | 6094988  |
| chr20 | 6094938  | 6097631  |
| chr20 | 6096901  | 6097631  |
| chr20 | 6112476  | 6116044  |
| chr20 | 61844667 | 61852898 |
| chr20 | 61997549 | 62000721 |
| chr20 | 61997549 | 62014707 |
| chr20 | 62007546 | 62014707 |
| chr20 | 62009051 | 62014707 |
| chr20 | 62124616 | 62131506 |
| chr20 | 62137363 | 62140944 |
| chr20 | 62138170 | 62140944 |
| chr20 | 62139074 | 62140944 |
| chr20 | 62139780 | 62140944 |
| chr20 | 62162751 | 62163622 |
| chr20 | 62162751 | 62164246 |
| chr20 | 62195801 | 62199257 |
| chr20 | 62256056 | 62260125 |
| chr20 | 62256056 | 62263691 |
| chr20 | 62256056 | 62264718 |
| chr20 | 62256056 | 62272259 |
| chr20 | 62273308 | 62284169 |
| chr20 | 62286582 | 62289330 |
| chr20 | 62336339 | 62362552 |
| chr20 | 62337803 | 62338369 |
| chr20 | 62345817 | 62347028 |
| chr20 | 62346912 | 62353251 |
| chr20 | 62656358 | 62665088 |
| chr20 | 62656358 | 62669078 |
| chr20 | 62660411 | 62661175 |
| chr20 | 62667744 | 62669078 |
| chr20 | 62854015 | 62857635 |
| chr20 | 62854015 | 62857638 |

|       |          |          |
|-------|----------|----------|
| chr20 | 62854015 | 62859526 |
| chr20 | 62854015 | 62860308 |
| chr20 | 62857394 | 62859526 |
| chr20 | 62857394 | 62860308 |
| chr20 | 62890959 | 62914406 |
| chr20 | 62896232 | 62896996 |
| chr20 | 62905886 | 62914406 |
| chr20 | 62909698 | 62914406 |
| chr20 | 62941490 | 62943692 |
| chr20 | 62942986 | 62943692 |
| chr20 | 63278116 | 63278995 |
| chr20 | 63278116 | 63284922 |
| chr20 | 63424176 | 63439708 |
| chr20 | 63424176 | 63446837 |
| chr20 | 63442405 | 63446837 |
| chr20 | 63521283 | 63521589 |
| chr20 | 63659232 | 63667553 |
| chr20 | 63672555 | 63674093 |
| chr20 | 63672555 | 63680719 |
| chr20 | 63741369 | 63742056 |
| chr20 | 63775677 | 63790790 |
| chr20 | 63928334 | 63931022 |
| chr20 | 64264428 | 64265429 |
| chr20 | 6446722  | 6473655  |
| chr20 | 7996025  | 8010315  |
| chr20 | 9217389  | 9339037  |
| chr20 | 9217389  | 9365514  |
| chr20 | 9307799  | 9339037  |
| chr20 | 9337125  | 9339037  |
| chr20 | 9338007  | 9380162  |
| chr20 | 9371213  | 9393678  |
| chr20 | 9389878  | 9395618  |
| chr20 | 9407916  | 9459810  |
| chr20 | 9407916  | 9473365  |
| chr20 | 9419806  | 9423952  |
| chr20 | 9435559  | 9457489  |
| chr20 | 9437001  | 9444243  |
| chr20 | 9437001  | 9457489  |
| chr20 | 9457413  | 9473365  |
| chr20 | 9468570  | 9473365  |
| chr21 | 15014343 | 15043574 |
| chr21 | 15762890 | 15766141 |
| chr21 | 15762890 | 15778027 |
| chr21 | 15762890 | 15805258 |
| chr21 | 15762890 | 15811210 |

|       |          |          |
|-------|----------|----------|
| chr21 | 15777903 | 15791664 |
| chr21 | 15777903 | 15805258 |
| chr21 | 15777903 | 15811210 |
| chr21 | 15791501 | 15842540 |
| chr21 | 15799756 | 15811210 |
| chr21 | 15799756 | 15842540 |
| chr21 | 15805120 | 15842540 |
| chr21 | 15808808 | 15831629 |
| chr21 | 15811136 | 15827203 |
| chr21 | 15833347 | 15842540 |
| chr21 | 15864267 | 15874526 |
| chr21 | 21280577 | 21286412 |
| chr21 | 21280577 | 21292241 |
| chr21 | 21280577 | 21338534 |
| chr21 | 21324382 | 21338534 |
| chr21 | 22041219 | 22096586 |
| chr21 | 25588834 | 25593958 |
| chr21 | 25588834 | 25601467 |
| chr21 | 25592811 | 25601467 |
| chr21 | 25597301 | 25599866 |
| chr21 | 25597301 | 25603935 |
| chr21 | 25683882 | 25698879 |
| chr21 | 25741572 | 25752234 |
| chr21 | 25741572 | 25758204 |
| chr21 | 25741572 | 25762365 |
| chr21 | 25891721 | 25911962 |
| chr21 | 25897572 | 25911962 |
| chr21 | 25954589 | 25955755 |
| chr21 | 25954589 | 25982477 |
| chr21 | 25954589 | 25997416 |
| chr21 | 25954589 | 26000182 |
| chr21 | 25975069 | 25982477 |
| chr21 | 25975069 | 25997416 |
| chr21 | 25975069 | 26000182 |
| chr21 | 25975953 | 25982477 |
| chr21 | 26021839 | 26053348 |
| chr21 | 26050999 | 26053348 |
| chr21 | 28941219 | 28947606 |
| chr21 | 28945806 | 28957476 |
| chr21 | 28982315 | 28986934 |
| chr21 | 28986138 | 28986934 |
| chr21 | 29046666 | 29050178 |
| chr21 | 29060540 | 29065105 |
| chr21 | 29060540 | 29071988 |
| chr21 | 29061495 | 29062415 |

|       |          |          |
|-------|----------|----------|
| chr21 | 29067555 | 29071988 |
| chr21 | 29305203 | 29321514 |
| chr21 | 29305203 | 29329693 |
| chr21 | 29321220 | 29329693 |
| chr21 | 29326058 | 29329693 |
| chr21 | 29326058 | 29351813 |
| chr21 | 29351633 | 29352663 |
| chr21 | 31135932 | 31147003 |
| chr21 | 31152635 | 31154426 |
| chr21 | 31164961 | 31195305 |
| chr21 | 31164961 | 31203012 |
| chr21 | 31182420 | 31195305 |
| chr21 | 31182420 | 31203012 |
| chr21 | 31213397 | 31217699 |
| chr21 | 31245487 | 31252189 |
| chr21 | 31266009 | 31276908 |
| chr21 | 31685048 | 31701918 |
| chr21 | 31690796 | 31694289 |
| chr21 | 31700994 | 31705467 |
| chr21 | 31700994 | 31706357 |
| chr21 | 32368402 | 32375483 |
| chr21 | 32368402 | 32384464 |
| chr21 | 32372506 | 32378541 |
| chr21 | 32378444 | 32384464 |
| chr21 | 32383421 | 32385684 |
| chr21 | 32453311 | 32467848 |
| chr21 | 32453311 | 32495170 |
| chr21 | 32457596 | 32467848 |
| chr21 | 32656686 | 32666573 |
| chr21 | 32694227 | 32695282 |
| chr21 | 32694227 | 32702047 |
| chr21 | 32738172 | 32755353 |
| chr21 | 32743677 | 32751218 |
| chr21 | 32748498 | 32755353 |
| chr21 | 33241839 | 33245074 |
| chr21 | 33241839 | 33246890 |
| chr21 | 33241885 | 33252830 |
| chr21 | 33246717 | 33248854 |
| chr21 | 33340998 | 33343676 |
| chr21 | 33345245 | 33349543 |
| chr21 | 33414887 | 33432871 |
| chr21 | 33421479 | 33432871 |
| chr21 | 33426883 | 33432871 |
| chr21 | 33432176 | 33432871 |
| chr21 | 33455726 | 33467122 |

|       |          |          |
|-------|----------|----------|
| chr21 | 33460412 | 33467122 |
| chr21 | 33460412 | 33468926 |
| chr21 | 33465341 | 33468926 |
| chr21 | 33520905 | 33539356 |
| chr21 | 33524768 | 33539356 |
| chr21 | 33530758 | 33535320 |
| chr21 | 33530758 | 33539356 |
| chr21 | 33534578 | 33535320 |
| chr21 | 33534578 | 33539356 |
| chr21 | 33579349 | 33583666 |
| chr21 | 33579349 | 33584768 |
| chr21 | 33581301 | 33583666 |
| chr21 | 33581301 | 33586181 |
| chr21 | 33583487 | 33586181 |
| chr21 | 33718796 | 33722651 |
| chr21 | 33718796 | 33735204 |
| chr21 | 33722587 | 33735204 |
| chr21 | 33735043 | 33761986 |
| chr21 | 33750142 | 33755397 |
| chr21 | 33750142 | 33761986 |
| chr21 | 33750142 | 33766012 |
| chr21 | 33765874 | 33767828 |
| chr21 | 33781460 | 33782133 |
| chr21 | 33810974 | 33829745 |
| chr21 | 33813912 | 33834424 |
| chr21 | 33823486 | 33826863 |
| chr21 | 33903934 | 33914500 |
| chr21 | 33907340 | 33909211 |
| chr21 | 34521498 | 34523710 |
| chr21 | 34834409 | 34859578 |
| chr21 | 34834409 | 34887096 |
| chr21 | 34859473 | 34887096 |
| chr21 | 36045581 | 36058973 |
| chr21 | 36199069 | 36208904 |
| chr21 | 36208714 | 36212097 |
| chr21 | 36223230 | 36227877 |
| chr21 | 36237261 | 36239955 |
| chr21 | 36245047 | 36248568 |
| chr21 | 36247516 | 36248568 |
| chr21 | 36247516 | 36251284 |
| chr21 | 36247516 | 36260732 |
| chr21 | 36263545 | 36270157 |
| chr21 | 36281482 | 36292233 |
| chr21 | 36288755 | 36292233 |
| chr21 | 36333645 | 36341546 |

|       |          |          |
|-------|----------|----------|
| chr21 | 36333645 | 36345031 |
| chr21 | 36336873 | 36338921 |
| chr21 | 36338773 | 36344707 |
| chr21 | 36344578 | 36349408 |
| chr21 | 36344578 | 36364259 |
| chr21 | 36362182 | 36364259 |
| chr21 | 36362182 | 36369876 |
| chr21 | 36364092 | 36372531 |
| chr21 | 36386059 | 36387730 |
| chr21 | 36387597 | 36399605 |
| chr21 | 36387597 | 36402851 |
| chr21 | 36391550 | 36394650 |
| chr21 | 36391550 | 36397511 |
| chr21 | 36391550 | 36402851 |
| chr21 | 36394546 | 36399605 |
| chr21 | 36402757 | 36411604 |
| chr21 | 36709167 | 36731151 |
| chr21 | 36712532 | 36731151 |
| chr21 | 36719820 | 36723130 |
| chr21 | 36719820 | 36731151 |
| chr21 | 36741716 | 36745136 |
| chr21 | 36759726 | 36765172 |
| chr21 | 37087246 | 37088886 |
| chr21 | 37087246 | 37096643 |
| chr21 | 37087246 | 37108446 |
| chr21 | 37088195 | 37094090 |
| chr21 | 37108391 | 37123028 |
| chr21 | 37108391 | 37126143 |
| chr21 | 37108391 | 37132766 |
| chr21 | 37108391 | 37135514 |
| chr21 | 37108391 | 37138714 |
| chr21 | 37108391 | 37140673 |
| chr21 | 37108391 | 37147603 |
| chr21 | 37108391 | 37150170 |
| chr21 | 37132681 | 37140673 |
| chr21 | 37144524 | 37147603 |
| chr21 | 37144524 | 37148647 |
| chr21 | 37187048 | 37196036 |
| chr21 | 37232376 | 37240639 |
| chr21 | 37238459 | 37240639 |
| chr21 | 37420298 | 37472880 |
| chr21 | 37420298 | 37480826 |
| chr21 | 37472683 | 37480826 |
| chr21 | 37472683 | 37496258 |
| chr21 | 37478180 | 37486614 |

|       |          |          |
|-------|----------|----------|
| chr21 | 39178448 | 39179986 |
| chr21 | 39198762 | 39200386 |
| chr21 | 39200218 | 39202545 |
| chr21 | 39202324 | 39213553 |
| chr21 | 39206107 | 39212707 |
| chr21 | 39206107 | 39213553 |
| chr21 | 39206107 | 39229436 |
| chr21 | 39213480 | 39218660 |
| chr21 | 39213480 | 39225197 |
| chr21 | 39215236 | 39218660 |
| chr21 | 39215236 | 39225197 |
| chr21 | 39218151 | 39225197 |
| chr21 | 39218151 | 39229436 |
| chr21 | 39224407 | 39225197 |
| chr21 | 39224407 | 39229436 |
| chr21 | 39224407 | 39232498 |
| chr21 | 39224407 | 39238573 |
| chr21 | 39232176 | 39232498 |
| chr21 | 39232176 | 39238573 |
| chr21 | 39232176 | 39250889 |
| chr21 | 39236594 | 39238573 |
| chr21 | 39247700 | 39258672 |
| chr21 | 39258486 | 39274472 |
| chr21 | 39264459 | 39298582 |
| chr21 | 39264890 | 39295903 |
| chr21 | 39269898 | 39270433 |
| chr21 | 39269898 | 39274472 |
| chr21 | 39270282 | 39280248 |
| chr21 | 39274373 | 39277351 |
| chr21 | 39274373 | 39278813 |
| chr21 | 39276172 | 39278813 |
| chr21 | 39278742 | 39298582 |
| chr21 | 39293810 | 39298582 |
| chr21 | 39390697 | 39393280 |
| chr21 | 41226265 | 41246063 |
| chr21 | 41226265 | 41257326 |
| chr21 | 41237512 | 41246063 |
| chr21 | 41237512 | 41257326 |
| chr21 | 41243375 | 41250901 |
| chr21 | 41815704 | 41823449 |
| chr21 | 41854565 | 41857329 |
| chr21 | 41854565 | 41860372 |
| chr21 | 41899052 | 41922085 |
| chr21 | 41901621 | 41909523 |
| chr21 | 41912331 | 41922085 |



|       |          |          |
|-------|----------|----------|
| chr21 | 41914597 | 41922085 |
| chr21 | 42751115 | 42772520 |
| chr21 | 42753989 | 42760432 |
| chr21 | 42850040 | 42859722 |
| chr21 | 42850040 | 42863596 |
| chr21 | 42850040 | 42876767 |
| chr21 | 42852254 | 42863596 |
| chr21 | 42852254 | 42876767 |
| chr21 | 42859661 | 42863596 |
| chr21 | 42859661 | 42876767 |
| chr21 | 42862281 | 42863596 |
| chr21 | 42862281 | 42876767 |
| chr21 | 42873550 | 42876767 |
| chr21 | 42896926 | 42904276 |
| chr21 | 43004325 | 43010224 |
| chr21 | 43004325 | 43018230 |
| chr21 | 43004325 | 43021431 |
| chr21 | 43004325 | 43024947 |
| chr21 | 43004325 | 43028874 |
| chr21 | 43592224 | 43613947 |
| chr21 | 43592224 | 43644392 |
| chr21 | 43613829 | 43633421 |
| chr21 | 43613829 | 43656737 |
| chr21 | 43630321 | 43633421 |
| chr21 | 43630321 | 43644392 |
| chr21 | 43630321 | 43656737 |
| chr21 | 43644288 | 43656737 |
| chr21 | 43669883 | 43673955 |
| chr21 | 43676732 | 43691502 |
| chr21 | 43686803 | 43688240 |
| chr21 | 43734068 | 43743807 |
| chr21 | 43797906 | 43800614 |
| chr21 | 43967945 | 43971490 |
| chr21 | 43967945 | 43978121 |
| chr21 | 44032090 | 44037927 |
| chr21 | 44032090 | 44052476 |
| chr21 | 44052279 | 44055893 |
| chr21 | 44052279 | 44059214 |
| chr21 | 44052279 | 44063785 |
| chr21 | 44052279 | 44077784 |
| chr21 | 44055697 | 44094233 |
| chr21 | 44063537 | 44075153 |
| chr21 | 44076551 | 44080127 |
| chr21 | 44077692 | 44080127 |
| chr21 | 44079563 | 44080127 |

|       |          |          |
|-------|----------|----------|
| chr21 | 44094062 | 44098534 |
| chr21 | 44855209 | 44861271 |
| chr21 | 45128401 | 45134832 |
| chr21 | 45171609 | 45176664 |
| chr21 | 45171609 | 45185091 |
| chr21 | 45175729 | 45204736 |
| chr21 | 45180329 | 45185091 |
| chr21 | 45269838 | 45278169 |
| chr21 | 45486860 | 45488444 |
| chr21 | 45525816 | 45532148 |
| chr21 | 45525816 | 45538008 |
| chr21 | 45530769 | 45538008 |
| chr21 | 46270400 | 46285394 |
| chr21 | 46273387 | 46277717 |
| chr21 | 46279992 | 46280575 |
| chr21 | 46314715 | 46315547 |
| chr21 | 46326376 | 46334768 |
| chr21 | 46346127 | 46347512 |
| chr21 | 46349011 | 46349820 |
| chr21 | 46363479 | 46367139 |
| chr21 | 46381693 | 46385983 |
| chr21 | 46381693 | 46391376 |
| chr21 | 46388741 | 46391376 |
| chr21 | 46484756 | 46497107 |
| chr21 | 46484756 | 46509376 |
| chr21 | 46484756 | 46511614 |
| chr21 | 46496987 | 46511614 |
| chr21 | 46496987 | 46539991 |
| chr21 | 46504360 | 46529183 |
| chr21 | 46509256 | 46539991 |
| chr21 | 46529091 | 46534687 |
| chr21 | 46537223 | 46541895 |
| chr21 | 46643534 | 46644488 |
| chr21 | 46643534 | 46649739 |
| chr21 | 46644305 | 46648619 |
| chr22 | 16611657 | 16614178 |
| chr22 | 16637039 | 16638740 |
| chr22 | 17044872 | 17047426 |
| chr22 | 17097061 | 17102302 |
| chr22 | 17141058 | 17149745 |
| chr22 | 17143097 | 17149745 |
| chr22 | 17145023 | 17149745 |
| chr22 | 17499409 | 17500735 |
| chr22 | 17500630 | 17505016 |
| chr22 | 17503081 | 17505016 |

|       |          |          |
|-------|----------|----------|
| chr22 | 17594528 | 17601181 |
| chr22 | 17655661 | 17702386 |
| chr22 | 17683213 | 17689142 |
| chr22 | 17683213 | 17702386 |
| chr22 | 17688985 | 17696210 |
| chr22 | 17808843 | 17823060 |
| chr22 | 17810702 | 17823060 |
| chr22 | 17864898 | 17872023 |
| chr22 | 17900841 | 17906886 |
| chr22 | 19063201 | 19068225 |
| chr22 | 19063201 | 19089490 |
| chr22 | 19139611 | 19142894 |
| chr22 | 19187557 | 19199841 |
| chr22 | 19221950 | 19232598 |
| chr22 | 19355759 | 19356288 |
| chr22 | 19375630 | 19378066 |
| chr22 | 19375630 | 19410778 |
| chr22 | 19383619 | 19410778 |
| chr22 | 19405785 | 19408593 |
| chr22 | 19820597 | 19821375 |
| chr22 | 19878365 | 19883461 |
| chr22 | 19911376 | 19931098 |
| chr22 | 20141216 | 20141530 |
| chr22 | 20400631 | 20401372 |
| chr22 | 20446442 | 20489244 |
| chr22 | 20457807 | 20489244 |
| chr22 | 20551435 | 20555148 |
| chr22 | 20551435 | 20568631 |
| chr22 | 20554935 | 20566817 |
| chr22 | 20764816 | 20765693 |
| chr22 | 20810966 | 20813506 |
| chr22 | 20824325 | 20838731 |
| chr22 | 20870336 | 20881134 |
| chr22 | 21483019 | 21484134 |
| chr22 | 21486799 | 21488381 |
| chr22 | 21681298 | 21684913 |
| chr22 | 21681298 | 21688849 |
| chr22 | 21769194 | 21799128 |
| chr22 | 21799011 | 21807846 |
| chr22 | 21965284 | 21975807 |
| chr22 | 23260949 | 23268515 |
| chr22 | 23273080 | 23273774 |
| chr22 | 23285032 | 23292638 |
| chr22 | 23292540 | 23295155 |
| chr22 | 23309423 | 23314714 |

|       |          |          |
|-------|----------|----------|
| chr22 | 23659864 | 23683867 |
| chr22 | 23683724 | 23695517 |
| chr22 | 23683724 | 23709867 |
| chr22 | 23705428 | 23709867 |
| chr22 | 23714186 | 23715194 |
| chr22 | 23791755 | 23793688 |
| chr22 | 24035443 | 24038461 |
| chr22 | 24035443 | 24043084 |
| chr22 | 24035443 | 24076284 |
| chr22 | 24072353 | 24076284 |
| chr22 | 24087451 | 24113748 |
| chr22 | 24091582 | 24134415 |
| chr22 | 24113565 | 24134415 |
| chr22 | 24302194 | 24313466 |
| chr22 | 24302194 | 24338477 |
| chr22 | 24302194 | 24347176 |
| chr22 | 24328845 | 24330431 |
| chr22 | 24347085 | 24369320 |
| chr22 | 24365475 | 24369320 |
| chr22 | 25170819 | 25185119 |
| chr22 | 25455711 | 25459515 |
| chr22 | 25457258 | 25459515 |
| chr22 | 25604376 | 25678915 |
| chr22 | 25604376 | 25690283 |
| chr22 | 25661575 | 25674528 |
| chr22 | 25661575 | 25678915 |
| chr22 | 25661575 | 25690283 |
| chr22 | 25663629 | 25674528 |
| chr22 | 25663629 | 25687667 |
| chr22 | 25667738 | 25674528 |
| chr22 | 25667738 | 25678915 |
| chr22 | 25672295 | 25690283 |
| chr22 | 25672295 | 25695214 |
| chr22 | 25678815 | 25695214 |
| chr22 | 26457858 | 26458577 |
| chr22 | 26496072 | 26496889 |
| chr22 | 27873737 | 27897892 |
| chr22 | 27873737 | 27911109 |
| chr22 | 27873737 | 27914347 |
| chr22 | 27894554 | 27897892 |
| chr22 | 27894554 | 27914347 |
| chr22 | 27910963 | 27914347 |
| chr22 | 27985248 | 27992663 |
| chr22 | 28014247 | 28030366 |
| chr22 | 28094079 | 28096408 |

|       |          |          |
|-------|----------|----------|
| chr22 | 28105278 | 28108403 |
| chr22 | 28296197 | 28297852 |
| chr22 | 28296197 | 28306643 |
| chr22 | 28694031 | 28695873 |
| chr22 | 28694031 | 28699937 |
| chr22 | 28694031 | 28719485 |
| chr22 | 28695709 | 28699937 |
| chr22 | 28699837 | 28712017 |
| chr22 | 28699837 | 28719485 |
| chr22 | 28699837 | 28725367 |
| chr22 | 28703504 | 28725367 |
| chr22 | 28703504 | 28734727 |
| chr22 | 28710005 | 28719485 |
| chr22 | 28710005 | 28725367 |
| chr22 | 28710005 | 28734727 |
| chr22 | 28719394 | 28725367 |
| chr22 | 28719394 | 28734727 |
| chr22 | 28724976 | 28725367 |
| chr22 | 28724976 | 28734727 |
| chr22 | 28744614 | 28746008 |
| chr22 | 28987075 | 29043430 |
| chr22 | 29042494 | 29044890 |
| chr22 | 29094257 | 29098953 |
| chr22 | 29121356 | 29125416 |
| chr22 | 29288605 | 29292606 |
| chr22 | 29338989 | 29342383 |
| chr22 | 29349217 | 29354871 |
| chr22 | 29350034 | 29354871 |
| chr22 | 29511105 | 29519120 |
| chr22 | 29539329 | 29542956 |
| chr22 | 29549051 | 29550843 |
| chr22 | 29558869 | 29570532 |
| chr22 | 29636750 | 29639212 |
| chr22 | 29636750 | 29642285 |
| chr22 | 29636750 | 29681601 |
| chr22 | 29642201 | 29661339 |
| chr22 | 29654656 | 29665064 |
| chr22 | 29813429 | 29814767 |
| chr22 | 29813429 | 29822464 |
| chr22 | 29825086 | 29832342 |
| chr22 | 29957035 | 29979052 |
| chr22 | 29970975 | 29979052 |
| chr22 | 29970975 | 29991670 |
| chr22 | 29970975 | 29998857 |
| chr22 | 29978441 | 29991670 |

|       |          |          |
|-------|----------|----------|
| chr22 | 29978441 | 29998857 |
| chr22 | 29988479 | 29991670 |
| chr22 | 30012367 | 30018072 |
| chr22 | 30285831 | 30287560 |
| chr22 | 30407094 | 30409486 |
| chr22 | 30407094 | 30410679 |
| chr22 | 30415758 | 30416403 |
| chr22 | 30694207 | 30741369 |
| chr22 | 30946340 | 30958694 |
| chr22 | 31089698 | 31090180 |
| chr22 | 31095302 | 31097338 |
| chr22 | 31095302 | 31101049 |
| chr22 | 31258290 | 31260077 |
| chr22 | 31258290 | 31262791 |
| chr22 | 31265945 | 31273507 |
| chr22 | 31403028 | 31411081 |
| chr22 | 31411011 | 31423410 |
| chr22 | 31411011 | 31427182 |
| chr22 | 31420255 | 31423410 |
| chr22 | 31420255 | 31427182 |
| chr22 | 31441773 | 31443094 |
| chr22 | 31447425 | 31448232 |
| chr22 | 31447425 | 31449531 |
| chr22 | 31447425 | 31450360 |
| chr22 | 31454143 | 31463133 |
| chr22 | 31455851 | 31463133 |
| chr22 | 31462931 | 31463967 |
| chr22 | 31463680 | 31468302 |
| chr22 | 31468174 | 31471917 |
| chr22 | 31508254 | 31546971 |
| chr22 | 31508254 | 31550348 |
| chr22 | 31528689 | 31550348 |
| chr22 | 31528689 | 31557059 |
| chr22 | 31556941 | 31561392 |
| chr22 | 31556941 | 31573214 |
| chr22 | 31580271 | 31589577 |
| chr22 | 31583874 | 31589577 |
| chr22 | 31583874 | 31602785 |
| chr22 | 31602211 | 31602785 |
| chr22 | 31620552 | 31621885 |
| chr22 | 31623683 | 31626016 |
| chr22 | 31688155 | 31704726 |
| chr22 | 31688155 | 31725610 |
| chr22 | 31701655 | 31704726 |
| chr22 | 31725537 | 31738911 |

|       |          |          |
|-------|----------|----------|
| chr22 | 31758545 | 31765060 |
| chr22 | 31758545 | 31766668 |
| chr22 | 31758545 | 31768863 |
| chr22 | 31758545 | 31778168 |
| chr22 | 31764974 | 31768863 |
| chr22 | 31766584 | 31784875 |
| chr22 | 31778098 | 31792817 |
| chr22 | 31792744 | 31798656 |
| chr22 | 31792744 | 31802838 |
| chr22 | 31798581 | 31804223 |
| chr22 | 31810520 | 31815212 |
| chr22 | 31845017 | 31846967 |
| chr22 | 31870589 | 31879752 |
| chr22 | 32478980 | 32485209 |
| chr22 | 32478980 | 32487828 |
| chr22 | 32478980 | 32493281 |
| chr22 | 32479132 | 32485209 |
| chr22 | 32479132 | 32487828 |
| chr22 | 32487744 | 32495530 |
| chr22 | 33304228 | 33316248 |
| chr22 | 33316084 | 33337801 |
| chr22 | 33564847 | 33604558 |
| chr22 | 33604434 | 33626326 |
| chr22 | 33761370 | 33856802 |
| chr22 | 35262322 | 35263226 |
| chr22 | 35283961 | 35288407 |
| chr22 | 35756104 | 35761468 |
| chr22 | 35756104 | 35781746 |
| chr22 | 35765422 | 35778078 |
| chr22 | 35781599 | 35810004 |
| chr22 | 35809779 | 35938897 |
| chr22 | 36285657 | 36285953 |
| chr22 | 36298918 | 36301665 |
| chr22 | 36316516 | 36318325 |
| chr22 | 36341369 | 36349255 |
| chr22 | 36501240 | 36504766 |
| chr22 | 36523208 | 36524732 |
| chr22 | 36523208 | 36526131 |
| chr22 | 37053099 | 37059438 |
| chr22 | 37495516 | 37497178 |
| chr22 | 37495759 | 37497178 |
| chr22 | 37496448 | 37497178 |
| chr22 | 37496448 | 37510421 |
| chr22 | 37510211 | 37518108 |
| chr22 | 37618447 | 37621696 |

|       |          |          |
|-------|----------|----------|
| chr22 | 37620812 | 37623467 |
| chr22 | 37623326 | 37623633 |
| chr22 | 37687909 | 37688992 |
| chr22 | 37812886 | 37813609 |
| chr22 | 37815125 | 37816725 |
| chr22 | 37850014 | 37851490 |
| chr22 | 37858678 | 37870347 |
| chr22 | 37863271 | 37878171 |
| chr22 | 37870175 | 37878171 |
| chr22 | 37874369 | 37876011 |
| chr22 | 37874369 | 37878171 |
| chr22 | 37875840 | 37878171 |
| chr22 | 37911951 | 37919178 |
| chr22 | 38224784 | 38231334 |
| chr22 | 38245934 | 38248019 |
| chr22 | 38293254 | 38314169 |
| chr22 | 38298785 | 38300065 |
| chr22 | 38298785 | 38314169 |
| chr22 | 38299894 | 38314169 |
| chr22 | 38302860 | 38303248 |
| chr22 | 38361398 | 38380990 |
| chr22 | 38492055 | 38498150 |
| chr22 | 38492055 | 38501280 |
| chr22 | 38493709 | 38494802 |
| chr22 | 38493709 | 38495046 |
| chr22 | 38493709 | 38499499 |
| chr22 | 38493709 | 38501280 |
| chr22 | 38494020 | 38501280 |
| chr22 | 38494629 | 38495046 |
| chr22 | 38494629 | 38501280 |
| chr22 | 38495795 | 38498573 |
| chr22 | 38495795 | 38499499 |
| chr22 | 38495795 | 38501280 |
| chr22 | 38498084 | 38498573 |
| chr22 | 38498084 | 38501280 |
| chr22 | 38521607 | 38568289 |
| chr22 | 38537591 | 38568289 |
| chr22 | 38552665 | 38568289 |
| chr22 | 38562286 | 38568289 |
| chr22 | 38620211 | 38623279 |
| chr22 | 38715906 | 38717000 |
| chr22 | 39374315 | 39376197 |
| chr22 | 39416790 | 39421971 |
| chr22 | 39682495 | 39684498 |
| chr22 | 40117054 | 40156182 |



|       |          |          |
|-------|----------|----------|
| chr22 | 40261831 | 40270280 |
| chr22 | 40261831 | 40273600 |
| chr22 | 40270121 | 40273600 |
| chr22 | 40273424 | 40280143 |
| chr22 | 40273424 | 40285770 |
| chr22 | 40277076 | 40285770 |
| chr22 | 40312504 | 40316012 |
| chr22 | 40353072 | 40359306 |
| chr22 | 40358863 | 40359306 |
| chr22 | 40358863 | 40360492 |
| chr22 | 40358863 | 40363071 |
| chr22 | 40400695 | 40402205 |
| chr22 | 40429605 | 40431480 |
| chr22 | 40429605 | 40435554 |
| chr22 | 40463220 | 40594735 |
| chr22 | 40552105 | 40594735 |
| chr22 | 40777039 | 40792676 |
| chr22 | 40777039 | 40799083 |
| chr22 | 40779008 | 40792676 |
| chr22 | 40832568 | 40848369 |
| chr22 | 40835559 | 40850880 |
| chr22 | 40840625 | 40850880 |
| chr22 | 40844838 | 40850880 |
| chr22 | 40868998 | 40886515 |
| chr22 | 40881769 | 40886515 |
| chr22 | 40886312 | 40914324 |
| chr22 | 40907586 | 40914324 |
| chr22 | 40907586 | 40924482 |
| chr22 | 40914238 | 40924482 |
| chr22 | 40953554 | 40967884 |
| chr22 | 41117186 | 41140257 |
| chr22 | 41125863 | 41127748 |
| chr22 | 41125863 | 41140257 |
| chr22 | 41135812 | 41137790 |
| chr22 | 41135812 | 41140257 |
| chr22 | 41137652 | 41141222 |
| chr22 | 41140139 | 41141222 |
| chr22 | 41146738 | 41150198 |
| chr22 | 41158411 | 41162779 |
| chr22 | 41172498 | 41173784 |
| chr22 | 41219418 | 41221287 |
| chr22 | 41256020 | 41258106 |
| chr22 | 41257947 | 41261580 |
| chr22 | 41264663 | 41274727 |
| chr22 | 41264663 | 41281082 |

|       |          |          |
|-------|----------|----------|
| chr22 | 41268096 | 41281082 |
| chr22 | 41274599 | 41281082 |
| chr22 | 41325563 | 41325918 |
| chr22 | 41330022 | 41343576 |
| chr22 | 41338312 | 41339191 |
| chr22 | 41342528 | 41343576 |
| chr22 | 41530686 | 41540795 |
| chr22 | 41540698 | 41544121 |
| chr22 | 41583958 | 41584603 |
| chr22 | 41636112 | 41637791 |
| chr22 | 41637607 | 41647082 |
| chr22 | 41637607 | 41650891 |
| chr22 | 41646895 | 41650891 |
| chr22 | 41646895 | 41657032 |
| chr22 | 41650722 | 41653690 |
| chr22 | 41656902 | 41658352 |
| chr22 | 41658251 | 41661444 |
| chr22 | 41680243 | 41682587 |
| chr22 | 41808874 | 41810000 |
| chr22 | 41808874 | 41810291 |
| chr22 | 41808874 | 41813822 |
| chr22 | 41866830 | 41868792 |
| chr22 | 41866830 | 41871035 |
| chr22 | 41943609 | 41945304 |
| chr22 | 42179608 | 42215341 |
| chr22 | 42599697 | 42603160 |
| chr22 | 42799038 | 42817857 |
| chr22 | 42808766 | 42817857 |
| chr22 | 42808766 | 42822409 |
| chr22 | 42810812 | 42826999 |
| chr22 | 42817141 | 42817857 |
| chr22 | 42823655 | 42835493 |
| chr22 | 42826939 | 42835493 |
| chr22 | 42876136 | 42882304 |
| chr22 | 43059383 | 43064324 |
| chr22 | 43989110 | 43990406 |
| chr22 | 44151482 | 44163930 |
| chr22 | 44285427 | 44300977 |
| chr22 | 44885425 | 44888121 |
| chr22 | 44885425 | 44896083 |
| chr22 | 44887962 | 44896083 |
| chr22 | 44913821 | 44920490 |
| chr22 | 45171599 | 45178900 |
| chr22 | 45178237 | 45181367 |
| chr22 | 45330602 | 45332710 |

|       |          |          |
|-------|----------|----------|
| chr22 | 45425947 | 45431066 |
| chr22 | 45518681 | 45550615 |
| chr22 | 45525542 | 45528009 |
| chr22 | 45574510 | 45577108 |
| chr22 | 45689711 | 45693078 |
| chr22 | 45689711 | 45702847 |
| chr22 | 45689711 | 45718493 |
| chr22 | 45689711 | 45729590 |
| chr22 | 45689711 | 45740538 |
| chr22 | 45692995 | 45702847 |
| chr22 | 45692995 | 45718493 |
| chr22 | 45692995 | 45740538 |
| chr22 | 45700281 | 45718493 |
| chr22 | 45700281 | 45729590 |
| chr22 | 45700281 | 45740538 |
| chr22 | 45718412 | 45740538 |
| chr22 | 45729424 | 45740538 |
| chr22 | 46176752 | 46198591 |
| chr22 | 46218262 | 46220014 |
| chr22 | 46308149 | 46308943 |
| chr22 | 46308149 | 46323262 |
| chr22 | 46308149 | 46326654 |
| chr22 | 46312140 | 46326654 |
| chr22 | 46316031 | 46326654 |
| chr22 | 46337778 | 46346544 |
| chr22 | 46343261 | 46346544 |
| chr22 | 46384542 | 46386585 |
| chr22 | 46384542 | 46389499 |
| chr22 | 46386401 | 46389499 |
| chr22 | 46390391 | 46391816 |
| chr22 | 46433392 | 46436289 |
| chr22 | 46433392 | 46439411 |
| chr22 | 46436173 | 46439411 |
| chr22 | 46668688 | 46675552 |
| chr22 | 46720085 | 46721015 |
| chr22 | 46792519 | 46797620 |
| chr22 | 46878652 | 46894846 |
| chr22 | 46878652 | 46912188 |
| chr22 | 46912073 | 46997709 |
| chr22 | 46912073 | 47037198 |
| chr22 | 46974289 | 46997709 |
| chr22 | 46974289 | 47037198 |
| chr22 | 46997633 | 47037198 |
| chr22 | 47686199 | 47686938 |
| chr22 | 47686199 | 47687206 |

|       |           |           |
|-------|-----------|-----------|
| chr22 | 47686199  | 47704747  |
| chr22 | 49775590  | 49777813  |
| chr22 | 49775590  | 49794294  |
| chr22 | 49775590  | 49804360  |
| chr22 | 49787389  | 49799119  |
| chr22 | 49787389  | 49804360  |
| chr22 | 49787389  | 49824331  |
| chr22 | 49794033  | 49804360  |
| chr22 | 49797804  | 49799119  |
| chr22 | 49797804  | 49804360  |
| chr22 | 50206316  | 50210911  |
| chr22 | 50224140  | 50226378  |
| chr22 | 50372019  | 50394135  |
| chr22 | 50422253  | 50423614  |
| chr22 | 50459254  | 50464917  |
| chr22 | 50703859  | 50715753  |
| chr22 | 50776669  | 50782351  |
| chr2  | 10046149  | 10048595  |
| chr2  | 100566502 | 100569721 |
| chr2  | 101002701 | 101006071 |
| chr2  | 101036017 | 101050641 |
| chr2  | 101050400 | 101059539 |
| chr2  | 101054107 | 101059539 |
| chr2  | 10124716  | 10129154  |
| chr2  | 101257790 | 101262691 |
| chr2  | 101257790 | 101265047 |
| chr2  | 101262538 | 101266879 |
| chr2  | 10126874  | 10127220  |
| chr2  | 101281858 | 101286177 |
| chr2  | 101281858 | 101295181 |
| chr2  | 101288972 | 101295181 |
| chr2  | 101294013 | 101295181 |
| chr2  | 10141853  | 10142375  |
| chr2  | 102657563 | 102665350 |
| chr2  | 102683260 | 102695113 |
| chr2  | 102694413 | 102704675 |
| chr2  | 105049170 | 105080062 |
| chr2  | 105284315 | 105298705 |
| chr2  | 105296355 | 105298705 |
| chr2  | 105816429 | 105855289 |
| chr2  | 10600852  | 10603157  |
| chr2  | 10600852  | 10607311  |
| chr2  | 10602775  | 10607311  |
| chr2  | 106112645 | 106125679 |
| chr2  | 106112645 | 106129778 |

|      |           |           |
|------|-----------|-----------|
| chr2 | 106122969 | 106129778 |
| chr2 | 106122969 | 106145370 |
| chr2 | 106122969 | 106166083 |
| chr2 | 106129673 | 106166083 |
| chr2 | 106145189 | 106166083 |
| chr2 | 10644319  | 10657891  |
| chr2 | 10644319  | 10663044  |
| chr2 | 10644319  | 10668723  |
| chr2 | 10644319  | 10671690  |
| chr2 | 10644319  | 10684612  |
| chr2 | 10654480  | 10668723  |
| chr2 | 10654480  | 10671690  |
| chr2 | 10657741  | 10684612  |
| chr2 | 10659171  | 10668723  |
| chr2 | 10662958  | 10668723  |
| chr2 | 10662958  | 10671690  |
| chr2 | 10667217  | 10671690  |
| chr2 | 10671553  | 10684612  |
| chr2 | 10675793  | 10684612  |
| chr2 | 10787280  | 10789889  |
| chr2 | 10787280  | 10802640  |
| chr2 | 10788696  | 10789889  |
| chr2 | 10788696  | 10790833  |
| chr2 | 10788696  | 10793202  |
| chr2 | 10790718  | 10793202  |
| chr2 | 10791794  | 10793202  |
| chr2 | 10791794  | 10797757  |
| chr2 | 10797080  | 10802640  |
| chr2 | 108659604 | 108673029 |
| chr2 | 108729131 | 108740681 |
| chr2 | 108740488 | 108753563 |
| chr2 | 108752997 | 108753563 |
| chr2 | 108752997 | 108773046 |
| chr2 | 108771700 | 108773046 |
| chr2 | 108788031 | 108816105 |
| chr2 | 108788851 | 108794721 |
| chr2 | 108788851 | 108812927 |
| chr2 | 108788851 | 108816105 |
| chr2 | 108791674 | 108805008 |
| chr2 | 108791674 | 108816105 |
| chr2 | 108791674 | 108846930 |
| chr2 | 108791674 | 108856970 |
| chr2 | 108812630 | 108812927 |
| chr2 | 108839184 | 108856970 |
| chr2 | 108856793 | 108873589 |

|      |           |           |
|------|-----------|-----------|
| chr2 | 109347673 | 109398943 |
| chr2 | 109553086 | 109593119 |
| chr2 | 109564365 | 109565859 |
| chr2 | 109564365 | 109567976 |
| chr2 | 109564365 | 109585838 |
| chr2 | 109564365 | 109593119 |
| chr2 | 109567814 | 109585838 |
| chr2 | 109574580 | 109585838 |
| chr2 | 109574580 | 109593119 |
| chr2 | 109585125 | 109585838 |
| chr2 | 109585125 | 109593119 |
| chr2 | 109821904 | 109824953 |
| chr2 | 110178422 | 110179684 |
| chr2 | 110562611 | 110569724 |
| chr2 | 110649233 | 110661841 |
| chr2 | 110666262 | 110669553 |
| chr2 | 110666262 | 110674224 |
| chr2 | 110672660 | 110674365 |
| chr2 | 111792361 | 111803839 |
| chr2 | 111800796 | 111803839 |
| chr2 | 111802427 | 111803839 |
| chr2 | 111802427 | 111805893 |
| chr2 | 111815369 | 111825167 |
| chr2 | 111822421 | 111825855 |
| chr2 | 111831285 | 111838512 |
| chr2 | 111831285 | 111850910 |
| chr2 | 111833219 | 111858401 |
| chr2 | 111838437 | 111850910 |
| chr2 | 111843411 | 111850910 |
| chr2 | 111843411 | 111856886 |
| chr2 | 111847137 | 111850910 |
| chr2 | 111850775 | 111858401 |
| chr2 | 111856613 | 111878971 |
| chr2 | 111858305 | 111873664 |
| chr2 | 111863674 | 111868096 |
| chr2 | 111864805 | 111878971 |
| chr2 | 111872629 | 111878971 |
| chr2 | 111872629 | 111880849 |
| chr2 | 111873307 | 111880849 |
| chr2 | 11192147  | 11195025  |
| chr2 | 111944959 | 111947567 |
| chr2 | 111965190 | 111982993 |
| chr2 | 112001200 | 112003984 |
| chr2 | 112059976 | 112067067 |
| chr2 | 11207725  | 11208447  |

|      |           |           |
|------|-----------|-----------|
| chr2 | 11207725  | 11235962  |
| chr2 | 112098594 | 112112929 |
| chr2 | 11214356  | 11217169  |
| chr2 | 11215320  | 11217169  |
| chr2 | 11221197  | 11224460  |
| chr2 | 112316469 | 112325197 |
| chr2 | 11235701  | 11249798  |
| chr2 | 112485916 | 112494375 |
| chr2 | 112485916 | 112501341 |
| chr2 | 112485916 | 112520425 |
| chr2 | 112494142 | 112503181 |
| chr2 | 11249660  | 11287736  |
| chr2 | 112501205 | 112503181 |
| chr2 | 112547011 | 112547567 |
| chr2 | 112547011 | 112552816 |
| chr2 | 112547011 | 112559574 |
| chr2 | 112547011 | 112564499 |
| chr2 | 112547082 | 112568137 |
| chr2 | 112550865 | 112552816 |
| chr2 | 112557909 | 112559574 |
| chr2 | 112557909 | 112573815 |
| chr2 | 112746419 | 112760764 |
| chr2 | 112755976 | 112760764 |
| chr2 | 11286538  | 11287736  |
| chr2 | 113460672 | 113482228 |
| chr2 | 113632914 | 113635130 |
| chr2 | 113717752 | 113755544 |
| chr2 | 113719153 | 113735858 |
| chr2 | 113723103 | 113735858 |
| chr2 | 113729400 | 113735858 |
| chr2 | 113729400 | 113743794 |
| chr2 | 113731583 | 113750568 |
| chr2 | 113734585 | 113750568 |
| chr2 | 113742691 | 113750568 |
| chr2 | 113746276 | 113755544 |
| chr2 | 113913171 | 113917008 |
| chr2 | 113913171 | 113942359 |
| chr2 | 113916883 | 113927455 |
| chr2 | 113916883 | 113931396 |
| chr2 | 113916883 | 113940102 |
| chr2 | 113916883 | 113942359 |
| chr2 | 113927344 | 113931396 |
| chr2 | 113927344 | 113934386 |
| chr2 | 113939958 | 113942359 |
| chr2 | 113951478 | 113955706 |

|      |           |           |
|------|-----------|-----------|
| chr2 | 11765532  | 11767858  |
| chr2 | 11765532  | 11773745  |
| chr2 | 11782200  | 11783922  |
| chr2 | 117824568 | 117826382 |
| chr2 | 11784885  | 11792006  |
| chr2 | 117935494 | 117941297 |
| chr2 | 117948104 | 117952435 |
| chr2 | 117985968 | 118008658 |
| chr2 | 11802906  | 11805156  |
| chr2 | 11815087  | 11820514  |
| chr2 | 119311621 | 119339971 |
| chr2 | 119317465 | 119340361 |
| chr2 | 119809836 | 119862643 |
| chr2 | 119809836 | 119920241 |
| chr2 | 119862535 | 119900806 |
| chr2 | 119877322 | 119885882 |
| chr2 | 119877322 | 119915242 |
| chr2 | 119882096 | 119915242 |
| chr2 | 119900717 | 119934958 |
| chr2 | 119920068 | 119926666 |
| chr2 | 119926597 | 119934958 |
| chr2 | 119926597 | 119945240 |
| chr2 | 119926597 | 119952129 |
| chr2 | 119932423 | 119934958 |
| chr2 | 119932423 | 119946574 |
| chr2 | 119932423 | 119965645 |
| chr2 | 119951972 | 119962744 |
| chr2 | 119951972 | 119967972 |
| chr2 | 119960806 | 119967972 |
| chr2 | 119962615 | 119967972 |
| chr2 | 120019076 | 120042110 |
| chr2 | 120073177 | 120078581 |
| chr2 | 120091554 | 120100814 |
| chr2 | 120127687 | 120146289 |
| chr2 | 120278617 | 120289757 |
| chr2 | 120285873 | 120289757 |
| chr2 | 121347037 | 121348718 |
| chr2 | 121363171 | 121367831 |
| chr2 | 121363171 | 121398400 |
| chr2 | 121410865 | 121457757 |
| chr2 | 121425138 | 121469960 |
| chr2 | 121430072 | 121457757 |
| chr2 | 121448952 | 121457757 |
| chr2 | 121450912 | 121458975 |
| chr2 | 121461100 | 121527890 |



|      |           |           |
|------|-----------|-----------|
| chr2 | 121503166 | 121525920 |
| chr2 | 121503166 | 121527890 |
| chr2 | 121503166 | 121530325 |
| chr2 | 121515664 | 121530325 |
| chr2 | 121525844 | 121530325 |
| chr2 | 121527798 | 121530325 |
| chr2 | 121730892 | 121732204 |
| chr2 | 121757239 | 121758806 |
| chr2 | 121757239 | 121761524 |
| chr2 | 121757239 | 121763084 |
| chr2 | 127057472 | 127059155 |
| chr2 | 127279172 | 127293718 |
| chr2 | 127286702 | 127293718 |
| chr2 | 127322045 | 127323994 |
| chr2 | 127335869 | 127339050 |
| chr2 | 127724332 | 127726777 |
| chr2 | 127763061 | 127771004 |
| chr2 | 127768188 | 127771004 |
| chr2 | 127850589 | 127853105 |
| chr2 | 127869453 | 127871359 |
| chr2 | 127949868 | 127955344 |
| chr2 | 127989563 | 127993308 |
| chr2 | 127989563 | 127996491 |
| chr2 | 127993186 | 127996491 |
| chr2 | 128014802 | 128017915 |
| chr2 | 128097428 | 128104014 |
| chr2 | 128097428 | 128109746 |
| chr2 | 128107937 | 128116343 |
| chr2 | 128107937 | 128129179 |
| chr2 | 128107937 | 128145967 |
| chr2 | 128123185 | 128129179 |
| chr2 | 128127360 | 128134961 |
| chr2 | 128127360 | 128145967 |
| chr2 | 128138716 | 128145967 |
| chr2 | 128143093 | 128145967 |
| chr2 | 128164729 | 128171284 |
| chr2 | 128164729 | 128173939 |
| chr2 | 128170287 | 128171284 |
| chr2 | 128172572 | 128174858 |
| chr2 | 128183674 | 128187614 |
| chr2 | 128186682 | 128187614 |
| chr2 | 130172348 | 130176637 |
| chr2 | 130358866 | 130359646 |
| chr2 | 130917396 | 130946635 |
| chr2 | 130930951 | 130946635 |

|      |           |           |
|------|-----------|-----------|
| chr2 | 131038852 | 131043583 |
| chr2 | 131052890 | 131055695 |
| chr2 | 131055271 | 131055695 |
| chr2 | 131055271 | 131082657 |
| chr2 | 131071854 | 131082657 |
| chr2 | 131125752 | 131130760 |
| chr2 | 131125752 | 131132991 |
| chr2 | 131125752 | 131140275 |
| chr2 | 134270385 | 134318739 |
| chr2 | 134317528 | 134318739 |
| chr2 | 134317528 | 134349938 |
| chr2 | 134317528 | 134362408 |
| chr2 | 134936840 | 134947899 |
| chr2 | 134942611 | 134947899 |
| chr2 | 134946100 | 134947899 |
| chr2 | 135090997 | 135093693 |
| chr2 | 135090997 | 135113270 |
| chr2 | 135090997 | 135115381 |
| chr2 | 135120818 | 135126656 |
| chr2 | 135120818 | 135135932 |
| chr2 | 135129994 | 135130721 |
| chr2 | 135129994 | 135135932 |
| chr2 | 135150368 | 135153876 |
| chr2 | 135224425 | 135228015 |
| chr2 | 135313488 | 135315530 |
| chr2 | 135313488 | 135345635 |
| chr2 | 135349983 | 135353628 |
| chr2 | 135602499 | 135605016 |
| chr2 | 135602499 | 135616757 |
| chr2 | 135602499 | 135675486 |
| chr2 | 135602499 | 135680324 |
| chr2 | 135645378 | 135680324 |
| chr2 | 135651729 | 135675486 |
| chr2 | 135651729 | 135680324 |
| chr2 | 135661269 | 135680324 |
| chr2 | 135675331 | 135680324 |
| chr2 | 135709432 | 135710231 |
| chr2 | 135748266 | 135755691 |
| chr2 | 135748266 | 135761911 |
| chr2 | 135748266 | 135780385 |
| chr2 | 135848052 | 135852915 |
| chr2 | 135851401 | 135870361 |
| chr2 | 135857896 | 135859442 |
| chr2 | 135862606 | 135865163 |
| chr2 | 135865012 | 135872843 |

|      |           |           |
|------|-----------|-----------|
| chr2 | 135916225 | 135924498 |
| chr2 | 135920452 | 135924498 |
| chr2 | 135920452 | 135933990 |
| chr2 | 135932782 | 135943480 |
| chr2 | 135932782 | 135961498 |
| chr2 | 135943377 | 135961498 |
| chr2 | 135961395 | 135983454 |
| chr2 | 138559021 | 138564993 |
| chr2 | 143951981 | 143970762 |
| chr2 | 144141881 | 144211579 |
| chr2 | 144208602 | 144211579 |
| chr2 | 144208602 | 144235737 |
| chr2 | 144424795 | 144430026 |
| chr2 | 144424795 | 144517419 |
| chr2 | 147896300 | 147899567 |
| chr2 | 147896300 | 147899898 |
| chr2 | 147896363 | 147899898 |
| chr2 | 147948050 | 147975975 |
| chr2 | 147955346 | 147975975 |
| chr2 | 147972738 | 147975975 |
| chr2 | 147972738 | 147982081 |
| chr2 | 148021647 | 148233395 |
| chr2 | 148021647 | 148342336 |
| chr2 | 148178699 | 148233395 |
| chr2 | 148178699 | 148342336 |
| chr2 | 148458202 | 148470461 |
| chr2 | 148761781 | 148771387 |
| chr2 | 148922136 | 148937388 |
| chr2 | 148922136 | 148942760 |
| chr2 | 149575710 | 149582271 |
| chr2 | 150486693 | 150487455 |
| chr2 | 151275483 | 151278990 |
| chr2 | 151411259 | 151420379 |
| chr2 | 151416560 | 151420379 |
| chr2 | 151416560 | 151428922 |
| chr2 | 151416806 | 151420379 |
| chr2 | 151420189 | 151435580 |
| chr2 | 151420189 | 151437351 |
| chr2 | 151428783 | 151446575 |
| chr2 | 151436826 | 151443709 |
| chr2 | 151436826 | 151446575 |
| chr2 | 151438683 | 151443709 |
| chr2 | 151438683 | 151446575 |
| chr2 | 151441904 | 151443709 |
| chr2 | 15178987  | 15330765  |

|      |           |           |
|------|-----------|-----------|
| chr2 | 15186741  | 15309247  |
| chr2 | 151870530 | 151883370 |
| chr2 | 151872416 | 151883370 |
| chr2 | 151876425 | 151883370 |
| chr2 | 152123765 | 152150229 |
| chr2 | 152143826 | 152148300 |
| chr2 | 152144887 | 152148300 |
| chr2 | 152144887 | 152150229 |
| chr2 | 152147161 | 152150229 |
| chr2 | 152542738 | 152549097 |
| chr2 | 152542738 | 152561035 |
| chr2 | 152542738 | 152578964 |
| chr2 | 152558739 | 152561035 |
| chr2 | 152558739 | 152581049 |
| chr2 | 152560882 | 152578964 |
| chr2 | 152560882 | 152581049 |
| chr2 | 152575135 | 152581049 |
| chr2 | 152662602 | 152669270 |
| chr2 | 152662602 | 152693068 |
| chr2 | 152664137 | 152679109 |
| chr2 | 152670230 | 152671381 |
| chr2 | 152670230 | 152679472 |
| chr2 | 152672458 | 152693068 |
| chr2 | 152673597 | 152693068 |
| chr2 | 15275483  | 15277101  |
| chr2 | 15287072  | 15309247  |
| chr2 | 15327749  | 15330765  |
| chr2 | 15351991  | 15356416  |
| chr2 | 15351991  | 15383317  |
| chr2 | 15351991  | 15396475  |
| chr2 | 15351991  | 15478289  |
| chr2 | 15366579  | 15402301  |
| chr2 | 15374607  | 15402301  |
| chr2 | 15374607  | 15417712  |
| chr2 | 153900935 | 153944639 |
| chr2 | 153900935 | 154140505 |
| chr2 | 15394226  | 15402301  |
| chr2 | 15394226  | 15417712  |
| chr2 | 15394226  | 15427794  |
| chr2 | 15394226  | 15478289  |
| chr2 | 15402167  | 15427794  |
| chr2 | 15402167  | 15478289  |
| chr2 | 15415545  | 15417712  |
| chr2 | 15415545  | 15427794  |
| chr2 | 15461200  | 15478289  |

|      |           |           |
|------|-----------|-----------|
| chr2 | 15461200  | 15489022  |
| chr2 | 15461200  | 15558634  |
| chr2 | 15467328  | 15474324  |
| chr2 | 15467328  | 15478289  |
| chr2 | 15478225  | 15511350  |
| chr2 | 15478225  | 15534641  |
| chr2 | 15488893  | 15511350  |
| chr2 | 15488893  | 15534641  |
| chr2 | 15488893  | 15539356  |
| chr2 | 15488893  | 15558634  |
| chr2 | 15504144  | 15511350  |
| chr2 | 15504144  | 15534641  |
| chr2 | 15504144  | 15539356  |
| chr2 | 15504144  | 15558634  |
| chr2 | 15511211  | 15558634  |
| chr2 | 15534542  | 15539356  |
| chr2 | 15534542  | 15558634  |
| chr2 | 15551492  | 15558634  |
| chr2 | 15553425  | 15558634  |
| chr2 | 15595144  | 15602631  |
| chr2 | 15595144  | 15604509  |
| chr2 | 15595489  | 15599716  |
| chr2 | 15603191  | 15607313  |
| chr2 | 15618180  | 15629697  |
| chr2 | 15623435  | 15629697  |
| chr2 | 156476097 | 156513496 |
| chr2 | 156496043 | 156513496 |
| chr2 | 156510795 | 156513496 |
| chr2 | 156549607 | 156557582 |
| chr2 | 157760879 | 157770514 |
| chr2 | 157799426 | 157818559 |
| chr2 | 158309432 | 158345318 |
| chr2 | 158338725 | 158340680 |
| chr2 | 158533179 | 158577383 |
| chr2 | 158533179 | 158603104 |
| chr2 | 158533179 | 158621421 |
| chr2 | 158533179 | 158642699 |
| chr2 | 158533179 | 158663445 |
| chr2 | 158577270 | 158642699 |
| chr2 | 158603069 | 158631941 |
| chr2 | 158603069 | 158634289 |
| chr2 | 158603069 | 158642699 |
| chr2 | 158620989 | 158631941 |
| chr2 | 158620989 | 158634289 |
| chr2 | 158631752 | 158640759 |

|      |           |           |
|------|-----------|-----------|
| chr2 | 159001079 | 159136298 |
| chr2 | 159065895 | 159097834 |
| chr2 | 159136193 | 159150556 |
| chr2 | 159149141 | 159150556 |
| chr2 | 159169249 | 159170805 |
| chr2 | 159169249 | 159172272 |
| chr2 | 159185790 | 159199053 |
| chr2 | 159194256 | 159199053 |
| chr2 | 159224231 | 159225779 |
| chr2 | 159248371 | 159256375 |
| chr2 | 159248371 | 159259843 |
| chr2 | 159248371 | 159279945 |
| chr2 | 159271701 | 159283093 |
| chr2 | 159275545 | 159283093 |
| chr2 | 159373044 | 159374753 |
| chr2 | 159446781 | 159478721 |
| chr2 | 159715680 | 159729175 |
| chr2 | 159729008 | 159743253 |
| chr2 | 159729008 | 159752571 |
| chr2 | 159729008 | 159762993 |
| chr2 | 159743060 | 159745937 |
| chr2 | 159743060 | 159748903 |
| chr2 | 160300650 | 160318227 |
| chr2 | 160313155 | 160367391 |
| chr2 | 161179613 | 161204793 |
| chr2 | 161179613 | 161224746 |
| chr2 | 161203486 | 161224746 |
| chr2 | 161367477 | 161371322 |
| chr2 | 161367477 | 161395203 |
| chr2 | 165898685 | 165901910 |
| chr2 | 165907677 | 165912624 |
| chr2 | 165912513 | 165930364 |
| chr2 | 165924548 | 165945690 |
| chr2 | 1673642   | 1684151   |
| chr2 | 1673642   | 1693134   |
| chr2 | 1676926   | 1693134   |
| chr2 | 168012633 | 168065381 |
| chr2 | 168012633 | 168075231 |
| chr2 | 168012633 | 168129758 |
| chr2 | 168012633 | 168161842 |
| chr2 | 168012633 | 168182090 |
| chr2 | 1680192   | 1693134   |
| chr2 | 168063499 | 168075231 |
| chr2 | 168063499 | 168129758 |
| chr2 | 168074981 | 168129758 |

|      |           |           |
|------|-----------|-----------|
| chr2 | 168074981 | 168182090 |
| chr2 | 168129540 | 168140758 |
| chr2 | 168129540 | 168167407 |
| chr2 | 168138087 | 168140758 |
| chr2 | 168138087 | 168167407 |
| chr2 | 168138087 | 168182090 |
| chr2 | 168161786 | 168167407 |
| chr2 | 168161786 | 168182090 |
| chr2 | 168873584 | 168877384 |
| chr2 | 169482250 | 169488114 |
| chr2 | 169482250 | 169493836 |
| chr2 | 169482250 | 169499620 |
| chr2 | 169530586 | 169544835 |
| chr2 | 169530586 | 169572171 |
| chr2 | 169537226 | 169557297 |
| chr2 | 169538012 | 169544835 |
| chr2 | 169540050 | 169557297 |
| chr2 | 169544720 | 169557297 |
| chr2 | 169546217 | 169557297 |
| chr2 | 169555123 | 169557297 |
| chr2 | 169555123 | 169563350 |
| chr2 | 169557186 | 169563350 |
| chr2 | 169560386 | 169569252 |
| chr2 | 169560386 | 169572171 |
| chr2 | 169603641 | 169606146 |
| chr2 | 169603641 | 169607148 |
| chr2 | 169603641 | 169608758 |
| chr2 | 169603641 | 169614724 |
| chr2 | 169606038 | 169608758 |
| chr2 | 169606038 | 169614724 |
| chr2 | 169631765 | 169633247 |
| chr2 | 169800951 | 169805839 |
| chr2 | 169872235 | 169878574 |
| chr2 | 169872235 | 169906164 |
| chr2 | 169872235 | 169942634 |
| chr2 | 169891164 | 169896735 |
| chr2 | 169891164 | 169906164 |
| chr2 | 169896506 | 169906164 |
| chr2 | 169905113 | 169933008 |
| chr2 | 169925618 | 169933008 |
| chr2 | 169946287 | 170015366 |
| chr2 | 169958437 | 170029448 |
| chr2 | 169958437 | 170040985 |
| chr2 | 169986644 | 170040985 |
| chr2 | 170015280 | 170055584 |

|      |           |           |
|------|-----------|-----------|
| chr2 | 170040881 | 170061443 |
| chr2 | 170055459 | 170061443 |
| chr2 | 170073427 | 170080684 |
| chr2 | 170849285 | 170854022 |
| chr2 | 170951327 | 170956559 |
| chr2 | 170954649 | 170956559 |
| chr2 | 171006146 | 171014948 |
| chr2 | 171006146 | 171028405 |
| chr2 | 171011372 | 171028405 |
| chr2 | 171014850 | 171028405 |
| chr2 | 171028338 | 171046362 |
| chr2 | 171028338 | 171050174 |
| chr2 | 171028338 | 171061156 |
| chr2 | 171046173 | 171050174 |
| chr2 | 171046173 | 171082852 |
| chr2 | 171053760 | 171061156 |
| chr2 | 171053760 | 171082852 |
| chr2 | 171325840 | 171330698 |
| chr2 | 171325840 | 171331867 |
| chr2 | 171325840 | 171339554 |
| chr2 | 171337452 | 171339554 |
| chr2 | 171435082 | 171453213 |
| chr2 | 171435082 | 171476950 |
| chr2 | 171443522 | 171453213 |
| chr2 | 171448680 | 171453213 |
| chr2 | 171448680 | 171458075 |
| chr2 | 171448680 | 171458477 |
| chr2 | 171448680 | 171469030 |
| chr2 | 171448680 | 171473975 |
| chr2 | 171690146 | 171715443 |
| chr2 | 171787570 | 171809686 |
| chr2 | 171809605 | 171815202 |
| chr2 | 171809605 | 171855949 |
| chr2 | 171826797 | 171855949 |
| chr2 | 171833962 | 171855949 |
| chr2 | 171844368 | 171868823 |
| chr2 | 171855833 | 171868823 |
| chr2 | 171925536 | 171953001 |
| chr2 | 171925536 | 171976308 |
| chr2 | 171925536 | 171979363 |
| chr2 | 171946707 | 171953001 |
| chr2 | 171965337 | 171966949 |
| chr2 | 172474054 | 172480051 |
| chr2 | 172479640 | 172498100 |
| chr2 | 172484781 | 172485264 |



|      |           |           |
|------|-----------|-----------|
| chr2 | 172487263 | 172498100 |
| chr2 | 172558707 | 172562291 |
| chr2 | 172558707 | 172562800 |
| chr2 | 172558707 | 172570824 |
| chr2 | 172562219 | 172565073 |
| chr2 | 172562219 | 172566933 |
| chr2 | 172564502 | 172565073 |
| chr2 | 172564502 | 172570824 |
| chr2 | 172566855 | 172596023 |
| chr2 | 172568740 | 172593048 |
| chr2 | 172568740 | 172596023 |
| chr2 | 172570725 | 172596023 |
| chr2 | 172586277 | 172596023 |
| chr2 | 173169804 | 173191177 |
| chr2 | 173238372 | 173258815 |
| chr2 | 173358711 | 173359491 |
| chr2 | 173358711 | 173363462 |
| chr2 | 173358711 | 173365592 |
| chr2 | 173363225 | 173365592 |
| chr2 | 174078967 | 174082064 |
| chr2 | 174123179 | 174142000 |
| chr2 | 174123594 | 174142000 |
| chr2 | 174141824 | 174229451 |
| chr2 | 174223032 | 174229451 |
| chr2 | 174223032 | 174246815 |
| chr2 | 174398274 | 174404315 |
| chr2 | 174453736 | 174460088 |
| chr2 | 174581309 | 174585611 |
| chr2 | 174846879 | 174878128 |
| chr2 | 174846879 | 174944943 |
| chr2 | 174846879 | 174952202 |
| chr2 | 174915057 | 174944943 |
| chr2 | 174915057 | 174952202 |
| chr2 | 175080659 | 175097593 |
| chr2 | 175080659 | 175111654 |
| chr2 | 175080659 | 175114868 |
| chr2 | 175080659 | 175118369 |
| chr2 | 175080659 | 175121540 |
| chr2 | 175092542 | 175121540 |
| chr2 | 175093060 | 175118369 |
| chr2 | 175093060 | 175121540 |
| chr2 | 175111567 | 175114868 |
| chr2 | 175111567 | 175121540 |
| chr2 | 175117989 | 175136486 |
| chr2 | 175130137 | 175151158 |

|      |           |           |
|------|-----------|-----------|
| chr2 | 175937343 | 175939657 |
| chr2 | 175937343 | 175947692 |
| chr2 | 175937343 | 175964589 |
| chr2 | 175937343 | 175993223 |
| chr2 | 175947479 | 175979868 |
| chr2 | 175970763 | 175994280 |
| chr2 | 175970763 | 175995646 |
| chr2 | 175979809 | 175994280 |
| chr2 | 175979809 | 175995646 |
| chr2 | 176296859 | 176326901 |
| chr2 | 176296859 | 176328912 |
| chr2 | 176296859 | 176329426 |
| chr2 | 176296859 | 176330660 |
| chr2 | 176323391 | 176328912 |
| chr2 | 176328873 | 176330660 |
| chr2 | 17708638  | 17715065  |
| chr2 | 17708638  | 17745951  |
| chr2 | 17714860  | 17745951  |
| chr2 | 177232391 | 177234271 |
| chr2 | 17725256  | 17745951  |
| chr2 | 17731077  | 17745951  |
| chr2 | 17738220  | 17745951  |
| chr2 | 177420268 | 177441036 |
| chr2 | 177420268 | 177462018 |
| chr2 | 177434326 | 177445626 |
| chr2 | 177436763 | 177442486 |
| chr2 | 177436763 | 177462018 |
| chr2 | 177440964 | 177462018 |
| chr2 | 177440964 | 177468524 |
| chr2 | 177442406 | 177462018 |
| chr2 | 177442406 | 177468524 |
| chr2 | 177461892 | 177468524 |
| chr2 | 177461892 | 177482186 |
| chr2 | 177461892 | 177493199 |
| chr2 | 177482058 | 177513908 |
| chr2 | 177505505 | 177513908 |
| chr2 | 177505505 | 177523805 |
| chr2 | 177513818 | 177523805 |
| chr2 | 17759928  | 17768811  |
| chr2 | 17761395  | 17768811  |
| chr2 | 178284926 | 178328378 |
| chr2 | 178361681 | 178374027 |
| chr2 | 178383023 | 178385521 |
| chr2 | 178485640 | 178490814 |
| chr2 | 178535731 | 178537691 |

|      |           |           |
|------|-----------|-----------|
| chr2 | 178535731 | 178542361 |
| chr2 | 178540106 | 178542361 |
| chr2 | 178583523 | 178600667 |
| chr2 | 178591138 | 178600667 |
| chr2 | 179172119 | 179191866 |
| chr2 | 179964546 | 179971076 |
| chr2 | 179970500 | 179971076 |
| chr2 | 180982017 | 180984093 |
| chr2 | 181921947 | 181928278 |
| chr2 | 182736248 | 182743712 |
| chr2 | 182751657 | 182762801 |
| chr2 | 182934751 | 182942163 |
| chr2 | 182934751 | 183023916 |
| chr2 | 182952404 | 182953331 |
| chr2 | 182952404 | 182957596 |
| chr2 | 182962158 | 182967361 |
| chr2 | 182967215 | 182989186 |
| chr2 | 182967215 | 182995838 |
| chr2 | 182976892 | 183023916 |
| chr2 | 182981243 | 182982927 |
| chr2 | 182994838 | 183003325 |
| chr2 | 182994838 | 183023916 |
| chr2 | 183001952 | 183003325 |
| chr2 | 183128286 | 183130545 |
| chr2 | 183128286 | 183131117 |
| chr2 | 183128286 | 183133623 |
| chr2 | 183133565 | 183159652 |
| chr2 | 186501272 | 186502587 |
| chr2 | 186602020 | 186622430 |
| chr2 | 186602020 | 186625587 |
| chr2 | 186633328 | 186641588 |
| chr2 | 186638276 | 186652089 |
| chr2 | 186646685 | 186649885 |
| chr2 | 186675603 | 186675927 |
| chr2 | 186740227 | 186754049 |
| chr2 | 187484123 | 187503770 |
| chr2 | 189450902 | 189455444 |
| chr2 | 189450902 | 189469439 |
| chr2 | 189459335 | 189466582 |
| chr2 | 189719571 | 189720787 |
| chr2 | 189728659 | 189744788 |
| chr2 | 189753915 | 189754345 |
| chr2 | 189785345 | 189818180 |
| chr2 | 189791789 | 189795951 |
| chr2 | 189791789 | 189805754 |

|      |           |           |
|------|-----------|-----------|
| chr2 | 189791789 | 189818180 |
| chr2 | 189791789 | 189852777 |
| chr2 | 189791789 | 189855128 |
| chr2 | 189795768 | 189818180 |
| chr2 | 189805651 | 189818180 |
| chr2 | 189852654 | 189855128 |
| chr2 | 190212955 | 190252307 |
| chr2 | 190244886 | 190252307 |
| chr2 | 190287585 | 190296953 |
| chr2 | 190360038 | 190362687 |
| chr2 | 190510360 | 190514678 |
| chr2 | 190510360 | 190525378 |
| chr2 | 190655976 | 190673152 |
| chr2 | 190659157 | 190670459 |
| chr2 | 190659157 | 190673152 |
| chr2 | 190895151 | 190905167 |
| chr2 | 190895151 | 190910321 |
| chr2 | 190895151 | 190921203 |
| chr2 | 190895151 | 190924593 |
| chr2 | 190900563 | 190905167 |
| chr2 | 190900563 | 190910321 |
| chr2 | 190900563 | 190921203 |
| chr2 | 190900563 | 190923983 |
| chr2 | 190900563 | 190924593 |
| chr2 | 190900563 | 190927482 |
| chr2 | 190900563 | 190931637 |
| chr2 | 190910262 | 190927482 |
| chr2 | 190979771 | 190983740 |
| chr2 | 191276886 | 191296226 |
| chr2 | 191276886 | 191330029 |
| chr2 | 191276886 | 191346282 |
| chr2 | 191276886 | 191350225 |
| chr2 | 191329934 | 191364276 |
| chr2 | 191360630 | 191364276 |
| chr2 | 196271192 | 196308085 |
| chr2 | 196656632 | 196677361 |
| chr2 | 196665566 | 196666848 |
| chr2 | 196672344 | 196677361 |
| chr2 | 196766564 | 196779067 |
| chr2 | 196772915 | 196779067 |
| chr2 | 196789203 | 196791460 |
| chr2 | 196870940 | 196873758 |
| chr2 | 196912881 | 196920150 |
| chr2 | 197007805 | 197009031 |
| chr2 | 197078702 | 197090032 |

|      |           |           |
|------|-----------|-----------|
| chr2 | 197407997 | 197410007 |
| chr2 | 197416740 | 197423974 |
| chr2 | 197459931 | 197462731 |
| chr2 | 197487857 | 197490296 |
| chr2 | 197493323 | 197495376 |
| chr2 | 197493323 | 197498850 |
| chr2 | 197494156 | 197495376 |
| chr2 | 197494156 | 197497392 |
| chr2 | 197494156 | 197498850 |
| chr2 | 197494656 | 197495376 |
| chr2 | 197523623 | 197540437 |
| chr2 | 197523623 | 197548415 |
| chr2 | 197535529 | 197540437 |
| chr2 | 197535529 | 197550386 |
| chr2 | 19930395  | 19982534  |
| chr2 | 199308759 | 199328910 |
| chr2 | 199308759 | 199368707 |
| chr2 | 199308759 | 199381820 |
| chr2 | 199323802 | 199328910 |
| chr2 | 199323802 | 199368707 |
| chr2 | 199323802 | 199381820 |
| chr2 | 199328697 | 199381820 |
| chr2 | 199348700 | 199381820 |
| chr2 | 199348700 | 199433514 |
| chr2 | 19935470  | 19951484  |
| chr2 | 199368604 | 199381820 |
| chr2 | 199368604 | 199433514 |
| chr2 | 199380363 | 199381820 |
| chr2 | 199380363 | 199433514 |
| chr2 | 200329430 | 200419496 |
| chr2 | 200412310 | 200419496 |
| chr2 | 200416378 | 200419496 |
| chr2 | 200439121 | 200440784 |
| chr2 | 200497752 | 200507091 |
| chr2 | 200498890 | 200507091 |
| chr2 | 200569662 | 200575461 |
| chr2 | 200612608 | 200627449 |
| chr2 | 200813207 | 200817241 |
| chr2 | 200854615 | 200856985 |
| chr2 | 200856681 | 200856985 |
| chr2 | 200856681 | 200858089 |
| chr2 | 200876918 | 200887685 |
| chr2 | 200920221 | 200937966 |
| chr2 | 200925835 | 200933974 |
| chr2 | 200925835 | 200937966 |

|      |           |           |
|------|-----------|-----------|
| chr2 | 200925835 | 200959440 |
| chr2 | 200931338 | 200933974 |
| chr2 | 200931338 | 200942777 |
| chr2 | 200941247 | 200958133 |
| chr2 | 200942684 | 200958133 |
| chr2 | 200992886 | 201009088 |
| chr2 | 201016990 | 201024039 |
| chr2 | 201016990 | 201045593 |
| chr2 | 201129728 | 201133134 |
| chr2 | 201129728 | 201136107 |
| chr2 | 201129728 | 201140439 |
| chr2 | 201129728 | 201149835 |
| chr2 | 201133028 | 201140439 |
| chr2 | 201133028 | 201149835 |
| chr2 | 201266460 | 201274953 |
| chr2 | 201399376 | 201407597 |
| chr2 | 201407402 | 201420706 |
| chr2 | 201705138 | 201715839 |
| chr2 | 201707868 | 201710038 |
| chr2 | 201723042 | 201733438 |
| chr2 | 201723042 | 201738735 |
| chr2 | 201738669 | 201744429 |
| chr2 | 201741673 | 201757759 |
| chr2 | 201749711 | 201757759 |
| chr2 | 201753145 | 201761818 |
| chr2 | 201760880 | 201768945 |
| chr2 | 202275112 | 202282472 |
| chr2 | 202275112 | 202284481 |
| chr2 | 202277949 | 202282472 |
| chr2 | 202282350 | 202284481 |
| chr2 | 202282350 | 202287724 |
| chr2 | 202284344 | 202287724 |
| chr2 | 202287659 | 202291270 |
| chr2 | 202287659 | 202295837 |
| chr2 | 202290322 | 202291270 |
| chr2 | 202290322 | 202292903 |
| chr2 | 202290322 | 202295837 |
| chr2 | 202290322 | 202297906 |
| chr2 | 202295673 | 202297906 |
| chr2 | 202297378 | 202297906 |
| chr2 | 202464808 | 202467689 |
| chr2 | 202464808 | 202520201 |
| chr2 | 202464808 | 202552888 |
| chr2 | 202513718 | 202519052 |
| chr2 | 202513718 | 202532732 |

|      |           |           |
|------|-----------|-----------|
| chr2 | 202518821 | 202532732 |
| chr2 | 20253821  | 20256170  |
| chr2 | 20254862  | 20256170  |
| chr2 | 20255215  | 20263460  |
| chr2 | 202755537 | 202759353 |
| chr2 | 20278582  | 20283486  |
| chr2 | 20278582  | 20327378  |
| chr2 | 202785917 | 202819899 |
| chr2 | 202785917 | 202829016 |
| chr2 | 202796889 | 202829016 |
| chr2 | 202811745 | 202819899 |
| chr2 | 202811745 | 202821481 |
| chr2 | 20282946  | 20327378  |
| chr2 | 202882710 | 202883741 |
| chr2 | 202883608 | 202896219 |
| chr2 | 202896064 | 202897415 |
| chr2 | 20297552  | 20318645  |
| chr2 | 203041764 | 203057453 |
| chr2 | 203049813 | 203057453 |
| chr2 | 203056426 | 203084569 |
| chr2 | 203056426 | 203099712 |
| chr2 | 20307977  | 20318645  |
| chr2 | 20307977  | 20327378  |
| chr2 | 203083218 | 203084569 |
| chr2 | 203099628 | 203127937 |
| chr2 | 203110149 | 203126926 |
| chr2 | 203122253 | 203126926 |
| chr2 | 203135676 | 203138748 |
| chr2 | 203171927 | 203180512 |
| chr2 | 203172728 | 203188589 |
| chr2 | 203193794 | 203197391 |
| chr2 | 203245845 | 203246921 |
| chr2 | 203245845 | 203266681 |
| chr2 | 203246754 | 203252109 |
| chr2 | 203278572 | 203289876 |
| chr2 | 203366876 | 203395780 |
| chr2 | 203380207 | 203391143 |
| chr2 | 203380207 | 203402734 |
| chr2 | 203380207 | 203417081 |
| chr2 | 203391045 | 203402734 |
| chr2 | 203394699 | 203411371 |
| chr2 | 203411284 | 203417081 |
| chr2 | 203444867 | 203455580 |
| chr2 | 203444867 | 203461408 |
| chr2 | 203444867 | 203461925 |

|      |           |           |
|------|-----------|-----------|
| chr2 | 203444867 | 203477156 |
| chr2 | 203447958 | 203448836 |
| chr2 | 203454429 | 203457595 |
| chr2 | 203454429 | 203461925 |
| chr2 | 203489583 | 203495353 |
| chr2 | 205158721 | 205193320 |
| chr2 | 205172210 | 205185863 |
| chr2 | 205172210 | 205193320 |
| chr2 | 206028110 | 206046612 |
| chr2 | 206046503 | 206056943 |
| chr2 | 206046503 | 206063244 |
| chr2 | 206126538 | 206133105 |
| chr2 | 206127796 | 206130242 |
| chr2 | 206127796 | 206142069 |
| chr2 | 206130087 | 206142831 |
| chr2 | 206132944 | 206142069 |
| chr2 | 206132944 | 206142831 |
| chr2 | 206138484 | 206142831 |
| chr2 | 206138484 | 206152510 |
| chr2 | 206141940 | 206145026 |
| chr2 | 206141940 | 206149096 |
| chr2 | 206141940 | 206149925 |
| chr2 | 206149019 | 206152510 |
| chr2 | 206279539 | 206281909 |
| chr2 | 206279539 | 206297373 |
| chr2 | 206445306 | 206481308 |
| chr2 | 206481231 | 206550160 |
| chr2 | 206542051 | 206550160 |
| chr2 | 206770090 | 206774397 |
| chr2 | 206770090 | 206790686 |
| chr2 | 207088457 | 207124404 |
| chr2 | 207088457 | 207165706 |
| chr2 | 20739970  | 20774979  |
| chr2 | 20739970  | 20801465  |
| chr2 | 207555627 | 207570321 |
| chr2 | 207555627 | 207577655 |
| chr2 | 207560225 | 207577655 |
| chr2 | 207567462 | 207577655 |
| chr2 | 207575271 | 207577655 |
| chr2 | 207724799 | 207742342 |
| chr2 | 207724799 | 207751119 |
| chr2 | 20774809  | 20790398  |
| chr2 | 20774809  | 20801465  |
| chr2 | 208271510 | 208277708 |
| chr2 | 208276711 | 208285933 |



|      |           |           |
|------|-----------|-----------|
| chr2 | 208276711 | 208288818 |
| chr2 | 208285725 | 208288818 |
| chr2 | 208288728 | 208302353 |
| chr2 | 208298640 | 208302353 |
| chr2 | 208298640 | 208304318 |
| chr2 | 208298640 | 208305013 |
| chr2 | 208302241 | 208330694 |
| chr2 | 208304170 | 208305013 |
| chr2 | 208312235 | 208317941 |
| chr2 | 208312235 | 208330694 |
| chr2 | 208312235 | 208348023 |
| chr2 | 208333314 | 208348023 |
| chr2 | 208342553 | 208348023 |
| chr2 | 208345110 | 208348023 |
| chr2 | 210104103 | 210154611 |
| chr2 | 210129030 | 210154611 |
| chr2 | 210455106 | 210472076 |
| chr2 | 210455106 | 210476412 |
| chr2 | 210556718 | 210582709 |
| chr2 | 211619176 | 211630594 |
| chr2 | 211701966 | 211704194 |
| chr2 | 213297261 | 213350645 |
| chr2 | 213310058 | 213317356 |
| chr2 | 213310058 | 213350645 |
| chr2 | 213310058 | 213364145 |
| chr2 | 213310058 | 213375119 |
| chr2 | 213340162 | 213364145 |
| chr2 | 214745066 | 214752555 |
| chr2 | 214745066 | 214769312 |
| chr2 | 214745066 | 214781509 |
| chr2 | 214745066 | 214797117 |
| chr2 | 214752446 | 214769312 |
| chr2 | 214752446 | 214781509 |
| chr2 | 214752446 | 214797117 |
| chr2 | 214767481 | 214781509 |
| chr2 | 214767481 | 214792445 |
| chr2 | 214767481 | 214797117 |
| chr2 | 214780559 | 214792445 |
| chr2 | 214780559 | 214797117 |
| chr2 | 214792296 | 214797117 |
| chr2 | 215312497 | 215319731 |
| chr2 | 215312497 | 215336124 |
| chr2 | 215319664 | 215326138 |
| chr2 | 215319664 | 215346941 |
| chr2 | 215325240 | 215333457 |

|      |           |           |
|------|-----------|-----------|
| chr2 | 215325240 | 215338907 |
| chr2 | 215325986 | 215338907 |
| chr2 | 215332381 | 215336124 |
| chr2 | 215332381 | 215338907 |
| chr2 | 215336034 | 215346941 |
| chr2 | 215344778 | 215349249 |
| chr2 | 216113015 | 216117794 |
| chr2 | 216113015 | 216132387 |
| chr2 | 216113015 | 216148276 |
| chr2 | 216113015 | 216162048 |
| chr2 | 216125916 | 216137225 |
| chr2 | 216141185 | 216148276 |
| chr2 | 216190224 | 216194986 |
| chr2 | 216277671 | 216283729 |
| chr2 | 216420298 | 216435496 |
| chr2 | 216464596 | 216478299 |
| chr2 | 216467943 | 216475451 |
| chr2 | 216499269 | 216500031 |
| chr2 | 218217462 | 218228850 |
| chr2 | 218217462 | 218239484 |
| chr2 | 218228737 | 218239484 |
| chr2 | 218234351 | 218239484 |
| chr2 | 218238663 | 218239484 |
| chr2 | 218245419 | 218249921 |
| chr2 | 218339782 | 218342144 |
| chr2 | 218457091 | 218463366 |
| chr2 | 218463305 | 218466176 |
| chr2 | 218466009 | 218474885 |
| chr2 | 218466009 | 218479715 |
| chr2 | 218474629 | 218485743 |
| chr2 | 218474629 | 218562813 |
| chr2 | 218476839 | 218482234 |
| chr2 | 218488303 | 218495950 |
| chr2 | 218495759 | 218498157 |
| chr2 | 218498025 | 218510140 |
| chr2 | 218509978 | 218530040 |
| chr2 | 218509978 | 218534706 |
| chr2 | 218509978 | 218562813 |
| chr2 | 218529955 | 218546298 |
| chr2 | 218546220 | 218547091 |
| chr2 | 218546220 | 218562813 |
| chr2 | 218546918 | 218560883 |
| chr2 | 218546918 | 218562813 |
| chr2 | 218549808 | 218560883 |
| chr2 | 218553552 | 218562813 |

|      |           |           |
|------|-----------|-----------|
| chr2 | 218558497 | 218562813 |
| chr2 | 218580560 | 218583086 |
| chr2 | 218580560 | 218584721 |
| chr2 | 218582970 | 218584721 |
| chr2 | 218582970 | 218587695 |
| chr2 | 218656149 | 218658801 |
| chr2 | 218660938 | 218663000 |
| chr2 | 218661758 | 218662260 |
| chr2 | 218727268 | 218740584 |
| chr2 | 218737578 | 218740584 |
| chr2 | 219444652 | 219451279 |
| chr2 | 219447973 | 219464608 |
| chr2 | 219451135 | 219464608 |
| chr2 | 219473503 | 219473903 |
| chr2 | 219566829 | 219568324 |
| chr2 | 221563730 | 221568785 |
| chr2 | 222599927 | 222619737 |
| chr2 | 222599927 | 222624479 |
| chr2 | 222599927 | 222624775 |
| chr2 | 222599927 | 222643005 |
| chr2 | 222613810 | 222624479 |
| chr2 | 222613810 | 222624775 |
| chr2 | 222613810 | 222634541 |
| chr2 | 222613810 | 222643005 |
| chr2 | 222619644 | 222624775 |
| chr2 | 222619644 | 222634541 |
| chr2 | 222623649 | 222624479 |
| chr2 | 222623649 | 222643005 |
| chr2 | 222628836 | 222643005 |
| chr2 | 222639579 | 222643005 |
| chr2 | 222639579 | 222648795 |
| chr2 | 222640861 | 222643005 |
| chr2 | 222900673 | 222909150 |
| chr2 | 222908732 | 222919202 |
| chr2 | 222916318 | 222921430 |
| chr2 | 222918045 | 222924595 |
| chr2 | 222921279 | 222934687 |
| chr2 | 222927016 | 222934687 |
| chr2 | 222930620 | 222934687 |
| chr2 | 223765212 | 223777869 |
| chr2 | 223775900 | 223777869 |
| chr2 | 223880123 | 223882072 |
| chr2 | 223880123 | 223884749 |
| chr2 | 223881941 | 223884749 |
| chr2 | 223884647 | 223895630 |

|      |           |           |
|------|-----------|-----------|
| chr2 | 223894233 | 223895630 |
| chr2 | 223998114 | 224001922 |
| chr2 | 224495831 | 224503072 |
| chr2 | 224495831 | 224503822 |
| chr2 | 224495831 | 224514772 |
| chr2 | 224495831 | 224535641 |
| chr2 | 224505955 | 224557856 |
| chr2 | 224535527 | 224557856 |
| chr2 | 226838072 | 226914351 |
| chr2 | 226839408 | 226914351 |
| chr2 | 226864603 | 226867318 |
| chr2 | 226864603 | 226908878 |
| chr2 | 226864603 | 226914351 |
| chr2 | 226906792 | 226914351 |
| chr2 | 226908821 | 226914351 |
| chr2 | 227328677 | 227329783 |
| chr2 | 227328677 | 227340380 |
| chr2 | 227330625 | 227332588 |
| chr2 | 227491546 | 227524915 |
| chr2 | 227519947 | 227524915 |
| chr2 | 227519947 | 227536993 |
| chr2 | 227523762 | 227524915 |
| chr2 | 227531090 | 227535025 |
| chr2 | 227531090 | 227536993 |
| chr2 | 227531090 | 227552117 |
| chr2 | 227885350 | 227893917 |
| chr2 | 227893794 | 227898281 |
| chr2 | 227893794 | 227907252 |
| chr2 | 227898181 | 227907252 |
| chr2 | 227903001 | 227905035 |
| chr2 | 227918779 | 227921561 |
| chr2 | 229155817 | 229262893 |
| chr2 | 229447315 | 229477253 |
| chr2 | 229447315 | 229591888 |
| chr2 | 229477139 | 229512936 |
| chr2 | 229477139 | 229547092 |
| chr2 | 229512782 | 229547092 |
| chr2 | 229585857 | 229591888 |
| chr2 | 229588393 | 229591888 |
| chr2 | 229768615 | 229771632 |
| chr2 | 229774096 | 229777479 |
| chr2 | 229802251 | 229804227 |
| chr2 | 229802251 | 229807864 |
| chr2 | 229802251 | 229811045 |
| chr2 | 229805729 | 229818512 |

|      |           |           |
|------|-----------|-----------|
| chr2 | 229805729 | 229830839 |
| chr2 | 229807707 | 229811045 |
| chr2 | 229813869 | 229818512 |
| chr2 | 229829192 | 229836984 |
| chr2 | 229836847 | 229840927 |
| chr2 | 229836847 | 229860531 |
| chr2 | 229840821 | 229860531 |
| chr2 | 229858771 | 229860531 |
| chr2 | 229858771 | 229880128 |
| chr2 | 229965    | 253115    |
| chr2 | 229976240 | 229996923 |
| chr2 | 230357804 | 230361697 |
| chr2 | 230357804 | 230383575 |
| chr2 | 230440475 | 230450255 |
| chr2 | 230442936 | 230449710 |
| chr2 | 230442936 | 230450255 |
| chr2 | 230461261 | 230474447 |
| chr2 | 230466300 | 230474447 |
| chr2 | 230759958 | 230793331 |
| chr2 | 230759958 | 230814114 |
| chr2 | 230790871 | 230793331 |
| chr2 | 230790871 | 230798897 |
| chr2 | 230798728 | 230817897 |
| chr2 | 231066905 | 231075571 |
| chr2 | 231066905 | 231087181 |
| chr2 | 231075510 | 231087181 |
| chr2 | 231138735 | 231153666 |
| chr2 | 231146239 | 231166017 |
| chr2 | 231206197 | 231216793 |
| chr2 | 231206197 | 231235381 |
| chr2 | 231206197 | 231240041 |
| chr2 | 231214830 | 231216793 |
| chr2 | 231235223 | 231240041 |
| chr2 | 231272954 | 231291443 |
| chr2 | 231272954 | 231296253 |
| chr2 | 232014834 | 232015671 |
| chr2 | 232014834 | 232024330 |
| chr2 | 232014834 | 232030080 |
| chr2 | 232014834 | 232087721 |
| chr2 | 232130618 | 232163632 |
| chr2 | 232136471 | 232163632 |
| chr2 | 232136471 | 232210405 |
| chr2 | 232210325 | 232263440 |
| chr2 | 232329812 | 232334735 |
| chr2 | 232329885 | 232335874 |

|      |           |           |
|------|-----------|-----------|
| chr2 | 232556415 | 232567214 |
| chr2 | 232564246 | 232567214 |
| chr2 | 232703423 | 232724691 |
| chr2 | 232703423 | 232761436 |
| chr2 | 232735154 | 232756334 |
| chr2 | 232735154 | 232761436 |
| chr2 | 232747614 | 232756334 |
| chr2 | 232747614 | 232761436 |
| chr2 | 232748986 | 232761436 |
| chr2 | 232787149 | 232794944 |
| chr2 | 232787149 | 232796221 |
| chr2 | 232790697 | 232791170 |
| chr2 | 232811243 | 232812491 |
| chr2 | 232832856 | 232839971 |
| chr2 | 233256101 | 233265143 |
| chr2 | 233256101 | 233270067 |
| chr2 | 233256101 | 233282753 |
| chr2 | 233388256 | 233390483 |
| chr2 | 233388256 | 233437479 |
| chr2 | 233434379 | 233436441 |
| chr2 | 233434379 | 233437479 |
| chr2 | 233434379 | 233438379 |
| chr2 | 233435817 | 233441995 |
| chr2 | 233438216 | 233441995 |
| chr2 | 233449981 | 233452060 |
| chr2 | 233450921 | 233452060 |
| chr2 | 233485530 | 233488304 |
| chr2 | 233549100 | 233551519 |
| chr2 | 23475559  | 23562481  |
| chr2 | 235034870 | 235043247 |
| chr2 | 235744697 | 235750488 |
| chr2 | 235744697 | 235807331 |
| chr2 | 235750353 | 235799522 |
| chr2 | 235750353 | 235807331 |
| chr2 | 235750353 | 235883449 |
| chr2 | 235797758 | 235807331 |
| chr2 | 235797758 | 235908906 |
| chr2 | 235883344 | 235908906 |
| chr2 | 235883344 | 235930923 |
| chr2 | 235883344 | 235968623 |
| chr2 | 235908737 | 235930923 |
| chr2 | 235930764 | 235968623 |
| chr2 | 235968461 | 236049281 |
| chr2 | 236036560 | 236049281 |
| chr2 | 23762208  | 23788647  |

|      |           |           |
|------|-----------|-----------|
| chr2 | 237708543 | 237720822 |
| chr2 | 237748363 | 237760205 |
| chr2 | 23782868  | 23823569  |
| chr2 | 23788511  | 23834078  |
| chr2 | 237973091 | 237973747 |
| chr2 | 237973091 | 237994809 |
| chr2 | 237973091 | 238035940 |
| chr2 | 23798137  | 23823569  |
| chr2 | 23798137  | 23834078  |
| chr2 | 238025341 | 238032254 |
| chr2 | 238025341 | 238035940 |
| chr2 | 238083247 | 238096876 |
| chr2 | 23810315  | 23823569  |
| chr2 | 23816636  | 23819882  |
| chr2 | 23816636  | 23834078  |
| chr2 | 238173533 | 238185287 |
| chr2 | 238173533 | 238188257 |
| chr2 | 238173533 | 238194870 |
| chr2 | 238182064 | 238185287 |
| chr2 | 238182064 | 238194870 |
| chr2 | 238185180 | 238189972 |
| chr2 | 238185180 | 238194870 |
| chr2 | 238188130 | 238189972 |
| chr2 | 238188130 | 238194870 |
| chr2 | 23819746  | 23823569  |
| chr2 | 23819746  | 23863555  |
| chr2 | 23823257  | 23828939  |
| chr2 | 238325305 | 238329342 |
| chr2 | 238332823 | 238338457 |
| chr2 | 238332823 | 238356080 |
| chr2 | 238347454 | 238356080 |
| chr2 | 238433553 | 238444727 |
| chr2 | 238435710 | 238444727 |
| chr2 | 23863380  | 23875904  |
| chr2 | 23867834  | 23875904  |
| chr2 | 23880638  | 23885829  |
| chr2 | 23880638  | 23888399  |
| chr2 | 23887831  | 23895970  |
| chr2 | 239081094 | 239090116 |
| chr2 | 239126455 | 239156773 |
| chr2 | 239126455 | 239176563 |
| chr2 | 239134244 | 239134643 |
| chr2 | 239134244 | 239163923 |
| chr2 | 239139683 | 239163923 |
| chr2 | 239144582 | 239236664 |

|      |           |           |
|------|-----------|-----------|
| chr2 | 239156651 | 239163923 |
| chr2 | 239156651 | 239176563 |
| chr2 | 239156651 | 239352918 |
| chr2 | 239176412 | 239236664 |
| chr2 | 239176412 | 239352918 |
| chr2 | 239189832 | 239352918 |
| chr2 | 239236592 | 239352918 |
| chr2 | 23958300  | 23977075  |
| chr2 | 23958300  | 23983033  |
| chr2 | 23958300  | 23984831  |
| chr2 | 23971275  | 23984831  |
| chr2 | 23982895  | 23984831  |
| chr2 | 239990073 | 240007370 |
| chr2 | 239990073 | 240011696 |
| chr2 | 239990073 | 240014860 |
| chr2 | 239990073 | 240021412 |
| chr2 | 239990073 | 240022340 |
| chr2 | 240005209 | 240014860 |
| chr2 | 240005209 | 240022340 |
| chr2 | 240011616 | 240022340 |
| chr2 | 240499957 | 240525849 |
| chr2 | 240499957 | 240555055 |
| chr2 | 240523884 | 240525849 |
| chr2 | 240552913 | 240555055 |
| chr2 | 24068320  | 24074194  |
| chr2 | 241122731 | 241143074 |
| chr2 | 241132873 | 241143074 |
| chr2 | 241140520 | 241143074 |
| chr2 | 241160331 | 241169867 |
| chr2 | 241236614 | 241238787 |
| chr2 | 241238648 | 241249980 |
| chr2 | 241246751 | 241247142 |
| chr2 | 241246751 | 241268541 |
| chr2 | 241262710 | 241268541 |
| chr2 | 241324215 | 241337790 |
| chr2 | 241324215 | 241348191 |
| chr2 | 241325992 | 241343093 |
| chr2 | 241335125 | 241346249 |
| chr2 | 241342991 | 241343897 |
| chr2 | 241342991 | 241346249 |
| chr2 | 241342991 | 241348191 |
| chr2 | 241343751 | 241348191 |
| chr2 | 24135118  | 24139450  |
| chr2 | 24135118  | 24147086  |
| chr2 | 24137908  | 24147086  |



|      |           |           |
|------|-----------|-----------|
| chr2 | 241403827 | 241413421 |
| chr2 | 241403827 | 241418109 |
| chr2 | 241403827 | 241434321 |
| chr2 | 241407536 | 241413421 |
| chr2 | 241407536 | 241418109 |
| chr2 | 241407536 | 241431774 |
| chr2 | 241407536 | 241434321 |
| chr2 | 241407536 | 241436538 |
| chr2 | 241411032 | 241418109 |
| chr2 | 241411032 | 241431774 |
| chr2 | 241456746 | 241475987 |
| chr2 | 241462522 | 241475987 |
| chr2 | 241601895 | 241603079 |
| chr2 | 241601895 | 241606473 |
| chr2 | 241651009 | 241659187 |
| chr2 | 241654545 | 241655343 |
| chr2 | 241654545 | 241668685 |
| chr2 | 241668142 | 241668685 |
| chr2 | 242114638 | 242122455 |
| chr2 | 242114638 | 242138888 |
| chr2 | 24293687  | 24295804  |
| chr2 | 24308616  | 24315224  |
| chr2 | 24312211  | 24315224  |
| chr2 | 24643965  | 24665915  |
| chr2 | 24673365  | 24697798  |
| chr2 | 24682950  | 24697798  |
| chr2 | 24691480  | 24697798  |
| chr2 | 24726588  | 24752156  |
| chr2 | 247537    | 253115    |
| chr2 | 24793851  | 24799844  |
| chr2 | 24799674  | 24814493  |
| chr2 | 25235706  | 25237005  |
| chr2 | 25274940  | 25275543  |
| chr2 | 25274940  | 25314161  |
| chr2 | 25427534  | 25433995  |
| chr2 | 25531472  | 25607321  |
| chr2 | 25531472  | 25628384  |
| chr2 | 25576837  | 25596240  |
| chr2 | 25576837  | 25607321  |
| chr2 | 25576837  | 25628384  |
| chr2 | 25607235  | 25628384  |
| chr2 | 25607235  | 25652661  |
| chr2 | 25628170  | 25639094  |
| chr2 | 25628170  | 25652661  |
| chr2 | 25749695  | 25756114  |

|      |          |          |
|------|----------|----------|
| chr2 | 25749695 | 25771540 |
| chr2 | 25767582 | 25771540 |
| chr2 | 25799384 | 25845563 |
| chr2 | 26098661 | 26127951 |
| chr2 | 26127143 | 26127951 |
| chr2 | 26209779 | 26215175 |
| chr2 | 26209779 | 26234355 |
| chr2 | 26230191 | 26234355 |
| chr2 | 26230191 | 26236988 |
| chr2 | 26230191 | 26239143 |
| chr2 | 26232159 | 26239143 |
| chr2 | 26263379 | 26277160 |
| chr2 | 26263379 | 26279315 |
| chr2 | 26269952 | 26277160 |
| chr2 | 26278613 | 26280115 |
| chr2 | 26278613 | 26284957 |
| chr2 | 26279134 | 26283051 |
| chr2 | 26279993 | 26284204 |
| chr2 | 26364301 | 26367220 |
| chr2 | 26364301 | 26373629 |
| chr2 | 26364301 | 26375148 |
| chr2 | 26364301 | 26383347 |
| chr2 | 26373366 | 26375148 |
| chr2 | 26373366 | 26383347 |
| chr2 | 26792130 | 26792833 |
| chr2 | 26924886 | 26928323 |
| chr2 | 26924886 | 26931684 |
| chr2 | 26940030 | 26944824 |
| chr2 | 27057302 | 27059404 |
| chr2 | 27058399 | 27059404 |
| chr2 | 27204460 | 27211533 |
| chr2 | 27206876 | 27211533 |
| chr2 | 27213176 | 27216620 |
| chr2 | 27221217 | 27226962 |
| chr2 | 27236283 | 27236830 |
| chr2 | 27237378 | 27239798 |
| chr2 | 27337243 | 27343578 |
| chr2 | 27366758 | 27367201 |
| chr2 | 27382125 | 27387158 |
| chr2 | 27462700 | 27465882 |
| chr2 | 27470927 | 27472362 |
| chr2 | 27483288 | 27484266 |
| chr2 | 27485017 | 27485503 |
| chr2 | 27598066 | 27608039 |
| chr2 | 27599582 | 27601442 |

|      |          |          |
|------|----------|----------|
| chr2 | 27599582 | 27603307 |
| chr2 | 27599582 | 27608039 |
| chr2 | 27615167 | 27617571 |
| chr2 | 27638209 | 27641279 |
| chr2 | 27660983 | 27662281 |
| chr2 | 27668842 | 27675692 |
| chr2 | 27668842 | 27677924 |
| chr2 | 27675531 | 27677924 |
| chr2 | 27677294 | 27677924 |
| chr2 | 27677294 | 27682359 |
| chr2 | 27987992 | 28025420 |
| chr2 | 27987992 | 28129380 |
| chr2 | 28025225 | 28129380 |
| chr2 | 28237201 | 28241393 |
| chr2 | 28237201 | 28244862 |
| chr2 | 28776850 | 28788809 |
| chr2 | 28783906 | 28788809 |
| chr2 | 28783906 | 28793997 |
| chr2 | 28815996 | 28822410 |
| chr2 | 28819047 | 28829319 |
| chr2 | 28829147 | 28840469 |
| chr2 | 28850327 | 28861308 |
| chr2 | 28850327 | 28865119 |
| chr2 | 28861117 | 28865119 |
| chr2 | 28901986 | 28906581 |
| chr2 | 28901986 | 28914208 |
| chr2 | 28906459 | 28914208 |
| chr2 | 28906459 | 28917995 |
| chr2 | 28906459 | 28937994 |
| chr2 | 28906459 | 28941574 |
| chr2 | 28912589 | 28914208 |
| chr2 | 28912589 | 28917995 |
| chr2 | 28917892 | 28929710 |
| chr2 | 28922918 | 28927700 |
| chr2 | 28926467 | 28929710 |
| chr2 | 28926467 | 28935607 |
| chr2 | 28935520 | 28942381 |
| chr2 | 28936921 | 28942381 |
| chr2 | 28937930 | 28942381 |
| chr2 | 29121373 | 29133816 |
| chr2 | 29121373 | 29135666 |
| chr2 | 29121373 | 29145367 |
| chr2 | 29121373 | 29167540 |
| chr2 | 29121373 | 29174445 |
| chr2 | 29131257 | 29135666 |

|      |          |          |
|------|----------|----------|
| chr2 | 29131257 | 29143945 |
| chr2 | 29133654 | 29143945 |
| chr2 | 29133654 | 29145367 |
| chr2 | 29133654 | 29157347 |
| chr2 | 29133654 | 29157402 |
| chr2 | 29133654 | 29160467 |
| chr2 | 29133654 | 29167540 |
| chr2 | 30459551 | 30476635 |
| chr2 | 30459551 | 30533314 |
| chr2 | 30459551 | 30568176 |
| chr2 | 30525586 | 30533314 |
| chr2 | 30525586 | 30568176 |
| chr2 | 30552492 | 30568176 |
| chr2 | 30562145 | 30568176 |
| chr2 | 30942200 | 30945870 |
| chr2 | 30942200 | 30955977 |
| chr2 | 30955617 | 30966302 |
| chr2 | 30955617 | 30993007 |
| chr2 | 30992837 | 31125253 |
| chr2 | 31383000 | 31383847 |
| chr2 | 31883385 | 31920910 |
| chr2 | 31883385 | 31932135 |
| chr2 | 31883385 | 31943383 |
| chr2 | 31891991 | 31920910 |
| chr2 | 31891991 | 31932135 |
| chr2 | 31891991 | 31943383 |
| chr2 | 31917925 | 31920910 |
| chr2 | 31917925 | 31932135 |
| chr2 | 31917925 | 31943383 |
| chr2 | 32098795 | 32116212 |
| chr2 | 32098795 | 32128479 |
| chr2 | 32114637 | 32116212 |
| chr2 | 32115701 | 32116212 |
| chr2 | 32128407 | 32141946 |
| chr2 | 3214148  | 3257455  |
| chr2 | 32171286 | 32184338 |
| chr2 | 32174062 | 32184338 |
| chr2 | 32174062 | 32192953 |
| chr2 | 32192335 | 32197826 |
| chr2 | 32192335 | 32206933 |
| chr2 | 32193888 | 32206933 |
| chr2 | 32377587 | 32380290 |
| chr2 | 32377587 | 32392150 |
| chr2 | 32377587 | 32395593 |
| chr2 | 32377587 | 32401623 |

|      |          |          |
|------|----------|----------|
| chr2 | 32377587 | 32406557 |
| chr2 | 32377587 | 32416163 |
| chr2 | 32388749 | 32392150 |
| chr2 | 32388749 | 32395593 |
| chr2 | 32388749 | 32416163 |
| chr2 | 32433643 | 32436184 |
| chr2 | 32436052 | 32453942 |
| chr2 | 32439507 | 32443588 |
| chr2 | 32439507 | 32453942 |
| chr2 | 32439507 | 32468111 |
| chr2 | 32445520 | 32453942 |
| chr2 | 32464508 | 32485759 |
| chr2 | 32473111 | 32477583 |
| chr2 | 32476212 | 32477583 |
| chr2 | 32478634 | 32479617 |
| chr2 | 32478634 | 32482582 |
| chr2 | 32478634 | 32493667 |
| chr2 | 32482428 | 32500109 |
| chr2 | 32488587 | 32493667 |
| chr2 | 32488587 | 32500109 |
| chr2 | 32491424 | 32493667 |
| chr2 | 32491424 | 32500109 |
| chr2 | 32491424 | 32503236 |
| chr2 | 32491424 | 32508259 |
| chr2 | 32499546 | 32513154 |
| chr2 | 32501712 | 32505205 |
| chr2 | 32501712 | 32513154 |
| chr2 | 32509737 | 32518946 |
| chr2 | 32510525 | 32513154 |
| chr2 | 32514989 | 32518946 |
| chr2 | 32518253 | 32518946 |
| chr2 | 32524887 | 32549481 |
| chr2 | 32524887 | 32575366 |
| chr2 | 32529650 | 32575366 |
| chr2 | 32543240 | 32549481 |
| chr2 | 32543240 | 32575366 |
| chr2 | 32575155 | 32594060 |
| chr2 | 32593914 | 32607643 |
| chr2 | 32595033 | 32597968 |
| chr2 | 32597750 | 32603083 |
| chr2 | 32597750 | 32611582 |
| chr2 | 32607454 | 32611582 |
| chr2 | 32630522 | 32634005 |
| chr2 | 32630522 | 32678922 |
| chr2 | 32633875 | 32640410 |

|      |          |          |
|------|----------|----------|
| chr2 | 32633875 | 32666768 |
| chr2 | 32640269 | 32678922 |
| chr2 | 32664302 | 32666768 |
| chr2 | 32702806 | 32758519 |
| chr2 | 32736693 | 32758519 |
| chr2 | 32758291 | 32787149 |
| chr2 | 32777881 | 32787149 |
| chr2 | 3387619  | 3401893  |
| chr2 | 3387619  | 3424663  |
| chr2 | 3401776  | 3424663  |
| chr2 | 3421880  | 3424663  |
| chr2 | 3421880  | 3443891  |
| chr2 | 3547930  | 3552308  |
| chr2 | 36396613 | 36442735 |
| chr2 | 36396613 | 36464655 |
| chr2 | 36396613 | 36479694 |
| chr2 | 36396613 | 36510139 |
| chr2 | 36396613 | 36522313 |
| chr2 | 36396613 | 36544498 |
| chr2 | 36441257 | 36442735 |
| chr2 | 36441257 | 36464655 |
| chr2 | 36441257 | 36479694 |
| chr2 | 36464533 | 36479694 |
| chr2 | 36464533 | 36513765 |
| chr2 | 36476888 | 36479694 |
| chr2 | 36476888 | 36522313 |
| chr2 | 36476888 | 36537546 |
| chr2 | 36499218 | 36517542 |
| chr2 | 36499218 | 36522313 |
| chr2 | 36509982 | 36522313 |
| chr2 | 36517326 | 36522313 |
| chr2 | 36555682 | 36591011 |
| chr2 | 36578596 | 36583469 |
| chr2 | 36578596 | 36591011 |
| chr2 | 36581289 | 36591011 |
| chr2 | 36877890 | 36916151 |
| chr2 | 36883931 | 36886826 |
| chr2 | 36988645 | 36990799 |
| chr2 | 36988645 | 37020836 |
| chr2 | 37003541 | 37007304 |
| chr2 | 37008610 | 37020836 |
| chr2 | 37013840 | 37020836 |
| chr2 | 37013840 | 37028920 |
| chr2 | 37019808 | 37020836 |
| chr2 | 37032628 | 37041292 |

|      |          |          |
|------|----------|----------|
| chr2 | 37037854 | 37041292 |
| chr2 | 37049652 | 37060733 |
| chr2 | 37053501 | 37058560 |
| chr2 | 37056439 | 37057480 |
| chr2 | 37068680 | 37077019 |
| chr2 | 37119958 | 37122664 |
| chr2 | 37139630 | 37141701 |
| chr2 | 37199703 | 37201726 |
| chr2 | 37213863 | 37217037 |
| chr2 | 37222379 | 37229036 |
| chr2 | 37236095 | 37237867 |
| chr2 | 37259582 | 37290999 |
| chr2 | 37267429 | 37293271 |
| chr2 | 37282541 | 37290999 |
| chr2 | 37282541 | 37293271 |
| chr2 | 37289355 | 37290999 |
| chr2 | 37289355 | 37293271 |
| chr2 | 37929261 | 37975314 |
| chr2 | 37974039 | 38004216 |
| chr2 | 37989540 | 37997514 |
| chr2 | 38309378 | 38319019 |
| chr2 | 38315283 | 38319019 |
| chr2 | 38568198 | 38591648 |
| chr2 | 38585643 | 38591648 |
| chr2 | 38746143 | 38750194 |
| chr2 | 38802714 | 38806693 |
| chr2 | 38837830 | 38843210 |
| chr2 | 38843004 | 38855252 |
| chr2 | 38880178 | 38881578 |
| chr2 | 39006411 | 39010703 |
| chr2 | 39051143 | 39058804 |
| chr2 | 39056701 | 39058804 |
| chr2 | 39258347 | 39267247 |
| chr2 | 39272282 | 39288280 |
| chr2 | 39272282 | 39315388 |
| chr2 | 39278406 | 39286964 |
| chr2 | 39278406 | 39288280 |
| chr2 | 39278406 | 39290334 |
| chr2 | 39282512 | 39308005 |
| chr2 | 39286851 | 39288280 |
| chr2 | 39286851 | 39290334 |
| chr2 | 39286851 | 39292826 |
| chr2 | 39290291 | 39308005 |
| chr2 | 39292772 | 39309519 |
| chr2 | 39299742 | 39333574 |

|      |          |          |
|------|----------|----------|
| chr2 | 39307942 | 39315388 |
| chr2 | 39331916 | 39337581 |
| chr2 | 39331916 | 39356339 |
| chr2 | 39331916 | 39378123 |
| chr2 | 39336919 | 39356339 |
| chr2 | 39336919 | 39378123 |
| chr2 | 39343387 | 39378123 |
| chr2 | 40139400 | 40164984 |
| chr2 | 40139400 | 40177855 |
| chr2 | 40160764 | 40164984 |
| chr2 | 40160764 | 40177855 |
| chr2 | 40160764 | 40178493 |
| chr2 | 42256500 | 42264731 |
| chr2 | 42261120 | 42264731 |
| chr2 | 42280849 | 42304551 |
| chr2 | 42284633 | 42295259 |
| chr2 | 42286268 | 42304551 |
| chr2 | 42295124 | 42326252 |
| chr2 | 42301240 | 42304551 |
| chr2 | 42570436 | 42609584 |
| chr2 | 42570436 | 42644244 |
| chr2 | 42609457 | 42644244 |
| chr2 | 42640172 | 42656302 |
| chr2 | 42640172 | 42659862 |
| chr2 | 42644126 | 42659862 |
| chr2 | 42682400 | 42695839 |
| chr2 | 42682400 | 42697834 |
| chr2 | 42695764 | 42723035 |
| chr2 | 42718987 | 42723035 |
| chr2 | 43291695 | 43293213 |
| chr2 | 43320445 | 43344237 |
| chr2 | 43320445 | 43398139 |
| chr2 | 43320445 | 43430302 |
| chr2 | 43397970 | 43428231 |
| chr2 | 43397970 | 43498955 |
| chr2 | 43397970 | 43527988 |
| chr2 | 43428099 | 43430302 |
| chr2 | 43428099 | 43485325 |
| chr2 | 43428099 | 43527988 |
| chr2 | 43485233 | 43508780 |
| chr2 | 43485233 | 43527988 |
| chr2 | 43498832 | 43508780 |
| chr2 | 43498832 | 43527988 |
| chr2 | 43498832 | 43541316 |
| chr2 | 43527878 | 43549368 |



|      |          |          |
|------|----------|----------|
| chr2 | 43527878 | 43592416 |
| chr2 | 43549209 | 43570510 |
| chr2 | 43552203 | 43570510 |
| chr2 | 43578512 | 43590954 |
| chr2 | 43581740 | 43592416 |
| chr2 | 43586400 | 43592416 |
| chr2 | 43590823 | 43592416 |
| chr2 | 43712224 | 43726451 |
| chr2 | 43720668 | 43731602 |
| chr2 | 43742740 | 43745963 |
| chr2 | 43776781 | 43789721 |
| chr2 | 43789632 | 43794643 |
| chr2 | 43794456 | 43801709 |
| chr2 | 43794456 | 43805246 |
| chr2 | 43894544 | 43905780 |
| chr2 | 43894544 | 43925961 |
| chr2 | 43899218 | 43918133 |
| chr2 | 43899218 | 43918398 |
| chr2 | 43905691 | 43918398 |
| chr2 | 43905691 | 43925961 |
| chr2 | 43905691 | 43934878 |
| chr2 | 43912431 | 43918398 |
| chr2 | 43912431 | 43925961 |
| chr2 | 43912431 | 43934296 |
| chr2 | 43912431 | 43934878 |
| chr2 | 43918024 | 43918398 |
| chr2 | 43918024 | 43925961 |
| chr2 | 43918024 | 43948518 |
| chr2 | 43918255 | 43945417 |
| chr2 | 43918255 | 43948518 |
| chr2 | 43925066 | 43934878 |
| chr2 | 43925066 | 43948518 |
| chr2 | 43925892 | 43947370 |
| chr2 | 43934189 | 43973900 |
| chr2 | 43934189 | 43982434 |
| chr2 | 43943686 | 43948199 |
| chr2 | 43943686 | 43957451 |
| chr2 | 43943686 | 43982434 |
| chr2 | 43960540 | 43963706 |
| chr2 | 43960540 | 43975217 |
| chr2 | 43960540 | 43982434 |
| chr2 | 43963587 | 43975217 |
| chr2 | 43963587 | 43982434 |
| chr2 | 43973606 | 43975217 |
| chr2 | 43973606 | 43982434 |

|      |          |          |
|------|----------|----------|
| chr2 | 43975090 | 43982434 |
| chr2 | 43977154 | 43982434 |
| chr2 | 44201185 | 44218537 |
| chr2 | 44209209 | 44218537 |
| chr2 | 44338350 | 44346390 |
| chr2 | 44704282 | 44715353 |
| chr2 | 44704282 | 44743696 |
| chr2 | 45413113 | 45488331 |
| chr2 | 45476992 | 45488331 |
| chr2 | 45476992 | 45553730 |
| chr2 | 45476992 | 45562756 |
| chr2 | 45488239 | 45553730 |
| chr2 | 45488239 | 45562756 |
| chr2 | 45488239 | 45585774 |
| chr2 | 45546731 | 45551282 |
| chr2 | 45546731 | 45553730 |
| chr2 | 45546731 | 45562756 |
| chr2 | 45546731 | 45574723 |
| chr2 | 45546731 | 45605441 |
| chr2 | 45573206 | 45585774 |
| chr2 | 45599448 | 45605441 |
| chr2 | 45601902 | 45605441 |
| chr2 | 45976428 | 45980381 |
| chr2 | 45976428 | 45984680 |
| chr2 | 46360637 | 46361090 |
| chr2 | 46576086 | 46576656 |
| chr2 | 46592474 | 46615185 |
| chr2 | 46612227 | 46615185 |
| chr2 | 46907809 | 46909177 |
| chr2 | 46950362 | 46957007 |
| chr2 | 46950362 | 46978907 |
| chr2 | 46956838 | 46978907 |
| chr2 | 46974972 | 46978907 |
| chr2 | 46974972 | 47006724 |
| chr2 | 46974972 | 47011435 |
| chr2 | 47005921 | 47011435 |
| chr2 | 47151257 | 47153016 |
| chr2 | 47161722 | 47172459 |
| chr2 | 47162285 | 47170764 |
| chr2 | 47408400 | 47445657 |
| chr2 | 47463030 | 47471062 |
| chr2 | 47790926 | 47796063 |
| chr2 | 47818778 | 47819078 |
| chr2 | 47822217 | 47823360 |
| chr2 | 47834578 | 47834871 |

|      |          |          |
|------|----------|----------|
| chr2 | 47834578 | 47839769 |
| chr2 | 47838858 | 47839769 |
| chr2 | 48328560 | 48346751 |
| chr2 | 48328560 | 48359147 |
| chr2 | 48328560 | 48373360 |
| chr2 | 48346200 | 48362707 |
| chr2 | 48451007 | 48465642 |
| chr2 | 48461137 | 48465642 |
| chr2 | 48474682 | 48480016 |
| chr2 | 48474682 | 48486758 |
| chr2 | 48474682 | 48491170 |
| chr2 | 48479923 | 48491170 |
| chr2 | 48495678 | 48511468 |
| chr2 | 48498492 | 48510113 |
| chr2 | 48498492 | 48511468 |
| chr2 | 48507268 | 48511468 |
| chr2 | 53693883 | 53716743 |
| chr2 | 53693883 | 53729570 |
| chr2 | 53693883 | 53750941 |
| chr2 | 53700270 | 53714581 |
| chr2 | 53714383 | 53716743 |
| chr2 | 53714383 | 53729570 |
| chr2 | 53728711 | 53750941 |
| chr2 | 53728711 | 53765585 |
| chr2 | 53750782 | 53765585 |
| chr2 | 53797514 | 53801842 |
| chr2 | 53808298 | 53814935 |
| chr2 | 53866084 | 53887467 |
| chr2 | 53874338 | 53885775 |
| chr2 | 53875626 | 53888812 |
| chr2 | 53885689 | 53887989 |
| chr2 | 53887258 | 53893799 |
| chr2 | 53887857 | 53906868 |
| chr2 | 53892807 | 53893799 |
| chr2 | 53895006 | 53901559 |
| chr2 | 53899880 | 53901559 |
| chr2 | 53919150 | 53921104 |
| chr2 | 53919150 | 53926023 |
| chr2 | 53919150 | 53927483 |
| chr2 | 53919150 | 53934727 |
| chr2 | 53922516 | 53927483 |
| chr2 | 53936086 | 53937540 |
| chr2 | 53948420 | 53949283 |
| chr2 | 54612160 | 54618193 |
| chr2 | 54813231 | 54820462 |

|      |          |          |
|------|----------|----------|
| chr2 | 54813231 | 54829477 |
| chr2 | 54813231 | 54853855 |
| chr2 | 54816786 | 54829477 |
| chr2 | 54820393 | 54829477 |
| chr2 | 54827565 | 54871605 |
| chr2 | 54928312 | 54928751 |
| chr2 | 54928312 | 54950779 |
| chr2 | 54982514 | 54987698 |
| chr2 | 55240010 | 55244233 |
| chr2 | 55246336 | 55249534 |
| chr2 | 55246336 | 55263865 |
| chr2 | 55249394 | 55262427 |
| chr2 | 55262315 | 55268739 |
| chr2 | 55263639 | 55267635 |
| chr2 | 55308808 | 55309254 |
| chr2 | 55317205 | 55319004 |
| chr2 | 55322527 | 55328432 |
| chr2 | 55355578 | 55364033 |
| chr2 | 55362307 | 55374883 |
| chr2 | 55528877 | 55535763 |
| chr2 | 55533872 | 55537585 |
| chr2 | 55558774 | 55573777 |
| chr2 | 55558774 | 55588956 |
| chr2 | 55564312 | 55581698 |
| chr2 | 55573618 | 55588956 |
| chr2 | 55577314 | 55588956 |
| chr2 | 55581566 | 55588956 |
| chr2 | 55585050 | 55588956 |
| chr2 | 55598415 | 55604076 |
| chr2 | 55598415 | 55615506 |
| chr2 | 55640626 | 55643425 |
| chr2 | 55640626 | 55644720 |
| chr2 | 55640626 | 55645432 |
| chr2 | 55643157 | 55644720 |
| chr2 | 55643157 | 55645432 |
| chr2 | 55644636 | 55646486 |
| chr2 | 55644636 | 55667958 |
| chr2 | 55647346 | 55656371 |
| chr2 | 55647346 | 55671376 |
| chr2 | 55647346 | 55685048 |
| chr2 | 55654899 | 55662026 |
| chr2 | 55660156 | 55667093 |
| chr2 | 55661955 | 55680918 |
| chr2 | 55661955 | 55685048 |
| chr2 | 55666990 | 55667958 |

|      |          |          |
|------|----------|----------|
| chr2 | 55666990 | 55672046 |
| chr2 | 55667861 | 55673079 |
| chr2 | 55671318 | 55680918 |
| chr2 | 55679681 | 55685048 |
| chr2 | 55679681 | 55686444 |
| chr2 | 55683784 | 55687705 |
| chr2 | 55870719 | 55881734 |
| chr2 | 55874945 | 55918267 |
| chr2 | 55917664 | 55922447 |
| chr2 | 58048826 | 58089723 |
| chr2 | 58058351 | 58089723 |
| chr2 | 58084088 | 58089723 |
| chr2 | 58198578 | 58222042 |
| chr2 | 58198578 | 58232112 |
| chr2 | 58198593 | 58229874 |
| chr2 | 58198593 | 58232112 |
| chr2 | 58221941 | 58232112 |
| chr2 | 60781884 | 60783209 |
| chr2 | 60782685 | 60787620 |
| chr2 | 60786946 | 60787620 |
| chr2 | 60786946 | 60792289 |
| chr2 | 60786946 | 60793715 |
| chr2 | 60891682 | 60901083 |
| chr2 | 61068848 | 61070500 |
| chr2 | 61068848 | 61071792 |
| chr2 | 61076919 | 61088468 |
| chr2 | 61081451 | 61088468 |
| chr2 | 61092463 | 61106662 |
| chr2 | 61092463 | 61134276 |
| chr2 | 61103852 | 61106662 |
| chr2 | 61108316 | 61118116 |
| chr2 | 61115978 | 61118116 |
| chr2 | 61162841 | 61163232 |
| chr2 | 61203139 | 61211929 |
| chr2 | 61203139 | 61214694 |
| chr2 | 61204496 | 61214694 |
| chr2 | 61206016 | 61211929 |
| chr2 | 61211771 | 61214694 |
| chr2 | 61220309 | 61222663 |
| chr2 | 61220309 | 61223296 |
| chr2 | 61223059 | 61227218 |
| chr2 | 61228644 | 61232532 |
| chr2 | 61229547 | 61232532 |
| chr2 | 61232451 | 61283449 |
| chr2 | 61235844 | 61246477 |

|      |          |          |
|------|----------|----------|
| chr2 | 61241559 | 61293550 |
| chr2 | 61245209 | 61266167 |
| chr2 | 61245209 | 61278443 |
| chr2 | 61248510 | 61266167 |
| chr2 | 61256383 | 61257350 |
| chr2 | 61259710 | 61266167 |
| chr2 | 61259710 | 61281242 |
| chr2 | 61259710 | 61293550 |
| chr2 | 61265396 | 61266167 |
| chr2 | 61278164 | 61281242 |
| chr2 | 61278164 | 61283449 |
| chr2 | 61278164 | 61293550 |
| chr2 | 61278164 | 61295290 |
| chr2 | 61280243 | 61281242 |
| chr2 | 61280243 | 61284957 |
| chr2 | 61280243 | 61296925 |
| chr2 | 61284874 | 61293550 |
| chr2 | 61284874 | 61295290 |
| chr2 | 61284874 | 61296925 |
| chr2 | 61296799 | 61333971 |
| chr2 | 61300950 | 61301454 |
| chr2 | 61300950 | 61333971 |
| chr2 | 61311539 | 61370579 |
| chr2 | 61325374 | 61333971 |
| chr2 | 61325374 | 61339681 |
| chr2 | 61325374 | 61350693 |
| chr2 | 61343814 | 61350693 |
| chr2 | 61343814 | 61370579 |
| chr2 | 61347869 | 61350693 |
| chr2 | 61350259 | 61350693 |
| chr2 | 61378362 | 61395233 |
| chr2 | 61394852 | 61406128 |
| chr2 | 61481184 | 61484105 |
| chr2 | 61481184 | 61485962 |
| chr2 | 61482379 | 61490776 |
| chr2 | 61482956 | 61490776 |
| chr2 | 61483936 | 61490776 |
| chr2 | 61485767 | 61490776 |
| chr2 | 61485767 | 61494091 |
| chr2 | 61490641 | 61493053 |
| chr2 | 61490641 | 61494091 |
| chr2 | 61490641 | 61498913 |
| chr2 | 61490641 | 61502310 |
| chr2 | 61492034 | 61497007 |
| chr2 | 61493893 | 61495613 |

|      |          |          |
|------|----------|----------|
| chr2 | 61493893 | 61497007 |
| chr2 | 61493893 | 61498913 |
| chr2 | 61493893 | 61502310 |
| chr2 | 61493893 | 61526521 |
| chr2 | 61495454 | 61498913 |
| chr2 | 61495454 | 61499894 |
| chr2 | 61496878 | 61526521 |
| chr2 | 61498672 | 61499894 |
| chr2 | 61498672 | 61502310 |
| chr2 | 61498672 | 61526521 |
| chr2 | 61498864 | 61533903 |
| chr2 | 61499712 | 61502310 |
| chr2 | 61522610 | 61526521 |
| chr2 | 61522610 | 61533903 |
| chr2 | 61872081 | 61872588 |
| chr2 | 61872081 | 61876234 |
| chr2 | 61872081 | 61879011 |
| chr2 | 61872081 | 61885072 |
| chr2 | 61872457 | 61883548 |
| chr2 | 61873001 | 61880394 |
| chr2 | 61873001 | 61883548 |
| chr2 | 61876094 | 61879011 |
| chr2 | 61876094 | 61880394 |
| chr2 | 61876094 | 61883548 |
| chr2 | 62747394 | 62771392 |
| chr2 | 62831018 | 62859291 |
| chr2 | 62943801 | 62949162 |
| chr2 | 62955516 | 62990840 |
| chr2 | 62979187 | 62996766 |
| chr2 | 62987930 | 62996766 |
| chr2 | 63152913 | 63174832 |
| chr2 | 63259306 | 63439871 |
| chr2 | 63313247 | 63382094 |
| chr2 | 63313247 | 63439871 |
| chr2 | 63404047 | 63439871 |
| chr2 | 63433744 | 63439871 |
| chr2 | 63484603 | 63487494 |
| chr2 | 63484603 | 63492940 |
| chr2 | 63597398 | 63599292 |
| chr2 | 63604695 | 63606028 |
| chr2 | 63856305 | 63857936 |
| chr2 | 63856305 | 63884093 |
| chr2 | 63856305 | 63886538 |
| chr2 | 63882465 | 63884093 |
| chr2 | 63882465 | 63887644 |

|      |          |          |
|------|----------|----------|
| chr2 | 63912344 | 63916963 |
| chr2 | 63913222 | 63916963 |
| chr2 | 63933672 | 63944655 |
| chr2 | 63933672 | 63984019 |
| chr2 | 63949036 | 63965966 |
| chr2 | 63962057 | 63965966 |
| chr2 | 63962057 | 63984019 |
| chr2 | 63968956 | 63981887 |
| chr2 | 63972165 | 63984019 |
| chr2 | 63981645 | 63984019 |
| chr2 | 64551442 | 64573068 |
| chr2 | 64551442 | 64585545 |
| chr2 | 64572945 | 64585545 |
| chr2 | 65001447 | 65010763 |
| chr2 | 65003952 | 65010763 |
| chr2 | 65090982 | 65098066 |
| chr2 | 65090982 | 65104806 |
| chr2 | 65239851 | 65255694 |
| chr2 | 65239851 | 65265175 |
| chr2 | 65246523 | 65251099 |
| chr2 | 65246523 | 65255694 |
| chr2 | 65246523 | 65265175 |
| chr2 | 65251026 | 65265175 |
| chr2 | 65261246 | 65265175 |
| chr2 | 65331986 | 65334773 |
| chr2 | 66464108 | 66512294 |
| chr2 | 68134701 | 68147567 |
| chr2 | 68138741 | 68147567 |
| chr2 | 68141693 | 68147567 |
| chr2 | 68161682 | 68162663 |
| chr2 | 68186467 | 68188690 |
| chr2 | 68490189 | 68502903 |
| chr2 | 68490189 | 68513680 |
| chr2 | 68490189 | 68526242 |
| chr2 | 68490189 | 68545312 |
| chr2 | 68490189 | 68567387 |
| chr2 | 68502730 | 68526242 |
| chr2 | 68513079 | 68545312 |
| chr2 | 68526060 | 68545312 |
| chr2 | 69070646 | 69077488 |
| chr2 | 69328270 | 69329798 |
| chr2 | 69328270 | 69345999 |
| chr2 | 69328270 | 69374113 |
| chr2 | 69337897 | 69338565 |
| chr2 | 69337897 | 69342249 |



|      |          |          |
|------|----------|----------|
| chr2 | 69337897 | 69345999 |
| chr2 | 69338444 | 69356557 |
| chr2 | 69345903 | 69374113 |
| chr2 | 69348170 | 69363670 |
| chr2 | 69350077 | 69374113 |
| chr2 | 69354488 | 69363670 |
| chr2 | 69354488 | 69374113 |
| chr2 | 69356495 | 69363670 |
| chr2 | 69358328 | 69363670 |
| chr2 | 69363544 | 69374113 |
| chr2 | 6940947  | 7014772  |
| chr2 | 69415184 | 69432005 |
| chr2 | 69505568 | 69507578 |
| chr2 | 69505568 | 69509460 |
| chr2 | 69505568 | 69643274 |
| chr2 | 69530007 | 69532162 |
| chr2 | 69806384 | 69810673 |
| chr2 | 69806384 | 69812709 |
| chr2 | 69816100 | 69819338 |
| chr2 | 69837546 | 69871832 |
| chr2 | 69844130 | 69864975 |
| chr2 | 69847542 | 69861347 |
| chr2 | 69847542 | 69864975 |
| chr2 | 69864899 | 69871832 |
| chr2 | 69988741 | 69996888 |
| chr2 | 70032132 | 70085624 |
| chr2 | 70051202 | 70085624 |
| chr2 | 70083537 | 70085624 |
| chr2 | 7014453  | 7020680  |
| chr2 | 7014453  | 7030215  |
| chr2 | 70160624 | 70181997 |
| chr2 | 70165091 | 70181997 |
| chr2 | 70175672 | 70181997 |
| chr2 | 70179531 | 70181997 |
| chr2 | 70214348 | 70230854 |
| chr2 | 70215370 | 70236175 |
| chr2 | 70224553 | 70230854 |
| chr2 | 70224553 | 70236175 |
| chr2 | 70227734 | 70236175 |
| chr2 | 70229263 | 70236175 |
| chr2 | 70259359 | 70261386 |
| chr2 | 71348752 | 71363191 |
| chr2 | 71355718 | 71370005 |
| chr2 | 71355718 | 71380565 |
| chr2 | 71363152 | 71368528 |

|      |          |          |
|------|----------|----------|
| chr2 | 71363152 | 71370005 |
| chr2 | 71363152 | 71380565 |
| chr2 | 71365428 | 71370005 |
| chr2 | 71365428 | 71380565 |
| chr2 | 71368381 | 71370005 |
| chr2 | 71368381 | 71396191 |
| chr2 | 71396140 | 71400180 |
| chr2 | 71396140 | 71400518 |
| chr2 | 71396140 | 71406262 |
| chr2 | 71396140 | 71418639 |
| chr2 | 71401955 | 71418639 |
| chr2 | 72134760 | 72135419 |
| chr2 | 72334946 | 72379870 |
| chr2 | 72465159 | 72480750 |
| chr2 | 72559452 | 72575668 |
| chr2 | 72559452 | 72733118 |
| chr2 | 72718102 | 72731245 |
| chr2 | 72718102 | 72733118 |
| chr2 | 72718102 | 72741469 |
| chr2 | 72731006 | 72733118 |
| chr2 | 72731006 | 72741469 |
| chr2 | 72731154 | 72741469 |
| chr2 | 72988257 | 73001578 |
| chr2 | 73020238 | 73040931 |
| chr2 | 73088049 | 73089315 |
| chr2 | 73239642 | 73244715 |
| chr2 | 73408621 | 73432291 |
| chr2 | 73419122 | 73426553 |
| chr2 | 73419122 | 73432291 |
| chr2 | 73432197 | 73455295 |
| chr2 | 73534823 | 73573424 |
| chr2 | 73550266 | 73559142 |
| chr2 | 73550266 | 73573424 |
| chr2 | 73557219 | 73559142 |
| chr2 | 73730559 | 73732285 |
| chr2 | 73938909 | 73946906 |
| chr2 | 73946718 | 73950732 |
| chr2 | 73950584 | 73957240 |
| chr2 | 74003109 | 74048411 |
| chr2 | 74046277 | 74080591 |
| chr2 | 74073548 | 74080591 |
| chr2 | 74159090 | 74172752 |
| chr2 | 74165217 | 74172752 |
| chr2 | 74167013 | 74172752 |
| chr2 | 74205704 | 74208721 |

|      |          |          |
|------|----------|----------|
| chr2 | 74207703 | 74208721 |
| chr2 | 74207703 | 74211291 |
| chr2 | 74207703 | 74211866 |
| chr2 | 74304488 | 74315025 |
| chr2 | 74377431 | 74378245 |
| chr2 | 74481222 | 74481538 |
| chr2 | 74506731 | 74507147 |
| chr2 | 74527470 | 74528006 |
| chr2 | 75518055 | 75522487 |
| chr2 | 75665928 | 75672016 |
| chr2 | 75670137 | 75672016 |
| chr2 | 75694240 | 75706651 |
| chr2 | 84425414 | 84449752 |
| chr2 | 84431507 | 84449752 |
| chr2 | 84441046 | 84449752 |
| chr2 | 84832054 | 84842007 |
| chr2 | 84839148 | 84842007 |
| chr2 | 85027888 | 85035155 |
| chr2 | 85027888 | 85046278 |
| chr2 | 85027888 | 85049648 |
| chr2 | 85043563 | 85046278 |
| chr2 | 85043563 | 85049648 |
| chr2 | 85345974 | 85350241 |
| chr2 | 85349383 | 85351021 |
| chr2 | 85368685 | 85371209 |
| chr2 | 85368685 | 85371562 |
| chr2 | 85541082 | 85542373 |
| chr2 | 85541082 | 85543034 |
| chr2 | 85541632 | 85543034 |
| chr2 | 85541828 | 85543034 |
| chr2 | 85542564 | 85543034 |
| chr2 | 85555483 | 85556260 |
| chr2 | 85555483 | 85559075 |
| chr2 | 85619219 | 85625691 |
| chr2 | 85619219 | 85636130 |
| chr2 | 85623645 | 85625691 |
| chr2 | 85637368 | 85641118 |
| chr2 | 85637368 | 85645083 |
| chr2 | 85644947 | 85648853 |
| chr2 | 85647929 | 85648853 |
| chr2 | 85861180 | 85863485 |
| chr2 | 86052816 | 86070272 |
| chr2 | 86065273 | 86081706 |
| chr2 | 86075029 | 86081706 |
| chr2 | 86098610 | 86100172 |

|      |          |          |
|------|----------|----------|
| chr2 | 86108349 | 86119044 |
| chr2 | 86116529 | 86119044 |
| chr2 | 86121478 | 86125515 |
| chr2 | 86121478 | 86125880 |
| chr2 | 86121478 | 86127991 |
| chr2 | 86123700 | 86125880 |
| chr2 | 86127160 | 86131106 |
| chr2 | 86132317 | 86134987 |
| chr2 | 86133345 | 86134987 |
| chr2 | 86151296 | 86166644 |
| chr2 | 86158591 | 86173761 |
| chr2 | 86159535 | 86162079 |
| chr2 | 86159535 | 86173761 |
| chr2 | 86166507 | 86173761 |
| chr2 | 86206105 | 86207327 |
| chr2 | 86251956 | 86264041 |
| chr2 | 86251956 | 86282242 |
| chr2 | 86442017 | 86457071 |
| chr2 | 86442017 | 86470408 |
| chr2 | 86474775 | 86480362 |
| chr2 | 86507478 | 86510479 |
| chr2 | 86740926 | 86753558 |
| chr2 | 86740926 | 86766024 |
| chr2 | 86751895 | 86753558 |
| chr2 | 86765026 | 86766024 |
| chr2 | 86770022 | 86771712 |
| chr2 | 8733443  | 8779814  |
| chr2 | 8747886  | 8751644  |
| chr2 | 8770669  | 8776892  |
| chr2 | 8798201  | 8803127  |
| chr2 | 8864169  | 8958642  |
| chr2 | 88729277 | 88738076 |
| chr2 | 88735668 | 88738076 |
| chr2 | 8877029  | 8908716  |
| chr2 | 8882510  | 8958642  |
| chr2 | 8888017  | 8958642  |
| chr2 | 8908620  | 8958642  |
| chr2 | 9279316  | 9297445  |
| chr2 | 9279316  | 9323250  |
| chr2 | 9279316  | 9327911  |
| chr2 | 9279316  | 9335179  |
| chr2 | 9279316  | 9350895  |
| chr2 | 9279316  | 9358889  |
| chr2 | 9297299  | 9335179  |
| chr2 | 9318523  | 9323250  |

|      |          |          |
|------|----------|----------|
| chr2 | 9318523  | 9327911  |
| chr2 | 9318523  | 9334813  |
| chr2 | 9318523  | 9335179  |
| chr2 | 9320287  | 9368519  |
| chr2 | 9344531  | 9344800  |
| chr2 | 9344531  | 9350895  |
| chr2 | 9344531  | 9356345  |
| chr2 | 9344531  | 9358889  |
| chr2 | 9344531  | 9368519  |
| chr2 | 9344531  | 9374944  |
| chr2 | 9350807  | 9358889  |
| chr2 | 9350807  | 9368519  |
| chr2 | 9350807  | 9374944  |
| chr2 | 9356046  | 9358889  |
| chr2 | 9356046  | 9368519  |
| chr2 | 9358755  | 9368519  |
| chr2 | 9358755  | 9393647  |
| chr2 | 9368424  | 9385358  |
| chr2 | 9376907  | 9380808  |
| chr2 | 9376907  | 9388546  |
| chr2 | 9385244  | 9393647  |
| chr2 | 9408112  | 9418732  |
| chr2 | 9412268  | 9418732  |
| chr2 | 9428764  | 9436361  |
| chr2 | 9428764  | 9441976  |
| chr2 | 9430751  | 9440666  |
| chr2 | 9432510  | 9433960  |
| chr2 | 9441817  | 9453021  |
| chr2 | 9443514  | 9459618  |
| chr2 | 9448197  | 9459618  |
| chr2 | 9448197  | 9471439  |
| chr2 | 9475986  | 9484550  |
| chr2 | 9509978  | 9527954  |
| chr2 | 9509978  | 9536828  |
| chr2 | 9509978  | 9543285  |
| chr2 | 95100473 | 95101723 |
| chr2 | 95100473 | 95104730 |
| chr2 | 95100473 | 95117945 |
| chr2 | 95152673 | 95157439 |
| chr2 | 9517900  | 9536828  |
| chr2 | 9517900  | 9543285  |
| chr2 | 9521202  | 9523338  |
| chr2 | 9521202  | 9527954  |
| chr2 | 9526110  | 9543285  |
| chr2 | 9527785  | 9536828  |

|      |          |          |
|------|----------|----------|
| chr2 | 9535833  | 9536828  |
| chr2 | 9535833  | 9543285  |
| chr2 | 95374295 | 95375208 |
| chr2 | 9587413  | 9591515  |
| chr2 | 95978121 | 95982362 |
| chr2 | 96192368 | 96195549 |
| chr2 | 96194957 | 96195549 |
| chr2 | 96267320 | 96269355 |
| chr2 | 96289798 | 96290815 |
| chr2 | 96360142 | 96360710 |
| chr2 | 96360142 | 96367373 |
| chr2 | 96601642 | 96602862 |
| chr2 | 96610725 | 96612934 |
| chr2 | 96707713 | 96738067 |
| chr2 | 96733518 | 96738067 |
| chr2 | 96797011 | 96797647 |
| chr2 | 96797011 | 96799648 |
| chr2 | 96853400 | 96854441 |
| chr2 | 96861578 | 96864148 |
| chr2 | 96861578 | 96867923 |
| chr2 | 97142639 | 97154741 |
| chr2 | 97146485 | 97154741 |
| chr2 | 97158106 | 97167767 |
| chr2 | 97167576 | 97187401 |
| chr2 | 97179737 | 97194917 |
| chr2 | 97658878 | 97661946 |
| chr2 | 97766113 | 97766602 |
| chr2 | 97805550 | 97812555 |
| chr2 | 97813970 | 97818721 |
| chr2 | 97813970 | 97833426 |
| chr2 | 97833364 | 97844261 |
| chr2 | 97888051 | 97927487 |
| chr2 | 9845219  | 9854421  |
| chr2 | 9845219  | 9876018  |
| chr2 | 9845219  | 9882805  |
| chr2 | 9849372  | 9868429  |
| chr2 | 9849372  | 9882805  |
| chr2 | 9851540  | 9905006  |
| chr2 | 98609755 | 98616533 |
| chr2 | 98655444 | 98658264 |
| chr2 | 98655444 | 98678471 |
| chr2 | 9882705  | 9919820  |
| chr2 | 9910735  | 9919820  |
| chr2 | 99169549 | 99171429 |
| chr2 | 99186176 | 99195756 |

|      |           |           |
|------|-----------|-----------|
| chr2 | 99194750  | 99195756  |
| chr2 | 99369391  | 99371730  |
| chr2 | 99412730  | 99435941  |
| chr2 | 99418827  | 99435941  |
| chr2 | 99421498  | 99435941  |
| chr2 | 99424151  | 99464985  |
| chr2 | 99429839  | 99435941  |
| chr2 | 99442316  | 99464985  |
| chr2 | 99449335  | 99464985  |
| chr2 | 99462495  | 99464985  |
| chr2 | 9954914   | 9964042   |
| chr2 | 9961045   | 9986282   |
| chr2 | 9961045   | 9993244   |
| chr2 | 9995878   | 9999029   |
| chr3 | 100160429 | 100162432 |
| chr3 | 100279648 | 100302237 |
| chr3 | 100283606 | 100290701 |
| chr3 | 100295086 | 100298045 |
| chr3 | 100295301 | 100299331 |
| chr3 | 100296171 | 100319204 |
| chr3 | 100319068 | 100320971 |
| chr3 | 10032831  | 10035233  |
| chr3 | 10032831  | 10036339  |
| chr3 | 100339086 | 100341161 |
| chr3 | 100339086 | 100348881 |
| chr3 | 10034468  | 10035233  |
| chr3 | 10036286  | 10039845  |
| chr3 | 100372605 | 100373645 |
| chr3 | 100372605 | 100386978 |
| chr3 | 100381614 | 100386978 |
| chr3 | 10046579  | 10049505  |
| chr3 | 10046579  | 10052497  |
| chr3 | 100555208 | 100558589 |
| chr3 | 100555208 | 100568967 |
| chr3 | 10065393  | 10065979  |
| chr3 | 10065393  | 10072981  |
| chr3 | 10065393  | 10078197  |
| chr3 | 10065393  | 10088950  |
| chr3 | 100713642 | 100720058 |
| chr3 | 100719974 | 100732672 |
| chr3 | 100732507 | 100736716 |
| chr3 | 10078080  | 10081464  |
| chr3 | 10081099  | 10081464  |
| chr3 | 10088448  | 10088950  |
| chr3 | 101398860 | 101459052 |

|      |           |           |
|------|-----------|-----------|
| chr3 | 101417592 | 101459052 |
| chr3 | 101579789 | 101585511 |
| chr3 | 101652495 | 101652938 |
| chr3 | 101652495 | 101654821 |
| chr3 | 101664537 | 101665808 |
| chr3 | 101664537 | 101671361 |
| chr3 | 101664537 | 101672213 |
| chr3 | 101671129 | 101672213 |
| chr3 | 101731839 | 101732654 |
| chr3 | 101801234 | 101807126 |
| chr3 | 101857072 | 101857459 |
| chr3 | 10209588  | 10213548  |
| chr3 | 10213206  | 10213548  |
| chr3 | 10226370  | 10239039  |
| chr3 | 10234458  | 10239039  |
| chr3 | 105552467 | 105571964 |
| chr3 | 105670232 | 105685466 |
| chr3 | 105681723 | 105704173 |
| chr3 | 107645835 | 107716849 |
| chr3 | 107710451 | 107716849 |
| chr3 | 107710451 | 107728960 |
| chr3 | 107710451 | 107733023 |
| chr3 | 107710451 | 107744710 |
| chr3 | 107710451 | 107755678 |
| chr3 | 107728764 | 107733023 |
| chr3 | 107732955 | 107755678 |
| chr3 | 108057476 | 108071182 |
| chr3 | 108554375 | 108560028 |
| chr3 | 108576270 | 108585212 |
| chr3 | 108605334 | 108616657 |
| chr3 | 108661876 | 108662257 |
| chr3 | 108669680 | 108677598 |
| chr3 | 111112029 | 111118952 |
| chr3 | 111112029 | 111122238 |
| chr3 | 111112029 | 111126335 |
| chr3 | 111112029 | 111147484 |
| chr3 | 111144898 | 111147484 |
| chr3 | 111913318 | 111920419 |
| chr3 | 111913318 | 111932397 |
| chr3 | 111913318 | 111945357 |
| chr3 | 111913318 | 111952712 |
| chr3 | 111919071 | 111939630 |
| chr3 | 111945267 | 111962312 |
| chr3 | 112537734 | 112550262 |
| chr3 | 112541802 | 112558417 |



|      |           |           |
|------|-----------|-----------|
| chr3 | 112548532 | 112558417 |
| chr3 | 112607175 | 112616858 |
| chr3 | 11298685  | 11299416  |
| chr3 | 112993025 | 112999564 |
| chr3 | 113010642 | 113017602 |
| chr3 | 113011044 | 113014032 |
| chr3 | 11306942  | 11315493  |
| chr3 | 11313303  | 11333093  |
| chr3 | 11315343  | 11342279  |
| chr3 | 11331339  | 11342279  |
| chr3 | 11331339  | 11348035  |
| chr3 | 11331339  | 11364734  |
| chr3 | 11331339  | 11380052  |
| chr3 | 11331339  | 11426926  |
| chr3 | 113341743 | 113344712 |
| chr3 | 113358744 | 113366309 |
| chr3 | 113379305 | 113416627 |
| chr3 | 113395749 | 113416627 |
| chr3 | 113395749 | 113427339 |
| chr3 | 113399905 | 113407041 |
| chr3 | 113399905 | 113416627 |
| chr3 | 113399905 | 113427339 |
| chr3 | 11340644  | 11348035  |
| chr3 | 11340644  | 11426926  |
| chr3 | 113416524 | 113433669 |
| chr3 | 113427186 | 113433669 |
| chr3 | 11347876  | 11380052  |
| chr3 | 113488944 | 113499582 |
| chr3 | 113488944 | 113506605 |
| chr3 | 113493205 | 113506605 |
| chr3 | 113499438 | 113506605 |
| chr3 | 11358417  | 11362928  |
| chr3 | 11358417  | 11364734  |
| chr3 | 11358417  | 11380052  |
| chr3 | 11358417  | 11426926  |
| chr3 | 113722905 | 113724095 |
| chr3 | 113723421 | 113724095 |
| chr3 | 113778740 | 113786383 |
| chr3 | 113778740 | 113788875 |
| chr3 | 113786231 | 113788875 |
| chr3 | 113788712 | 113789840 |
| chr3 | 11379971  | 11426926  |
| chr3 | 114065236 | 114070838 |
| chr3 | 11601832  | 11703047  |
| chr3 | 11807832  | 11817337  |

|      |           |           |
|------|-----------|-----------|
| chr3 | 11807832  | 11839314  |
| chr3 | 11809516  | 11829864  |
| chr3 | 11829713  | 11839314  |
| chr3 | 11829713  | 11844211  |
| chr3 | 119216239 | 119218772 |
| chr3 | 119380903 | 119383226 |
| chr3 | 119500694 | 119504021 |
| chr3 | 119500694 | 119513719 |
| chr3 | 119500694 | 119517315 |
| chr3 | 119503531 | 119513719 |
| chr3 | 119503531 | 119517315 |
| chr3 | 119503953 | 119517315 |
| chr3 | 119513640 | 119517315 |
| chr3 | 119843254 | 119876508 |
| chr3 | 119843254 | 119905852 |
| chr3 | 119863418 | 119876508 |
| chr3 | 119863418 | 119905852 |
| chr3 | 119876412 | 120002239 |
| chr3 | 119905754 | 119916174 |
| chr3 | 120334861 | 120335953 |
| chr3 | 120770727 | 120776664 |
| chr3 | 121439991 | 121473487 |
| chr3 | 121449314 | 121467640 |
| chr3 | 121449314 | 121468431 |
| chr3 | 121467518 | 121498670 |
| chr3 | 121468304 | 121473487 |
| chr3 | 121485040 | 121498670 |
| chr3 | 121493477 | 121498670 |
| chr3 | 121496807 | 121498670 |
| chr3 | 121510038 | 121544906 |
| chr3 | 121519870 | 121537208 |
| chr3 | 121519870 | 121544906 |
| chr3 | 121529644 | 121533209 |
| chr3 | 121532989 | 121541479 |
| chr3 | 121532989 | 121544906 |
| chr3 | 121714860 | 121730973 |
| chr3 | 121772556 | 121781874 |
| chr3 | 121781742 | 121809009 |
| chr3 | 121790072 | 121809009 |
| chr3 | 121844452 | 121857156 |
| chr3 | 121854686 | 121872788 |
| chr3 | 122362967 | 122371800 |
| chr3 | 122433660 | 122437295 |
| chr3 | 122437169 | 122442116 |
| chr3 | 122437169 | 122467429 |

|      |           |           |
|------|-----------|-----------|
| chr3 | 122442037 | 122452064 |
| chr3 | 122442037 | 122454001 |
| chr3 | 122442037 | 122464041 |
| chr3 | 122449573 | 122454001 |
| chr3 | 122449573 | 122467429 |
| chr3 | 122453869 | 122464041 |
| chr3 | 122461223 | 122467429 |
| chr3 | 122550583 | 122552639 |
| chr3 | 122687079 | 122695662 |
| chr3 | 122703741 | 122708268 |
| chr3 | 122752590 | 122755431 |
| chr3 | 122752590 | 122777906 |
| chr3 | 122759223 | 122768882 |
| chr3 | 122768700 | 122777906 |
| chr3 | 122833316 | 122860202 |
| chr3 | 123089167 | 123092442 |
| chr3 | 123089167 | 123111004 |
| chr3 | 123089167 | 123124343 |
| chr3 | 123106748 | 123124343 |
| chr3 | 123110943 | 123124343 |
| chr3 | 123116230 | 123124343 |
| chr3 | 123124065 | 123124343 |
| chr3 | 123124065 | 123130616 |
| chr3 | 123209198 | 123225297 |
| chr3 | 123209198 | 123259589 |
| chr3 | 123223558 | 123259589 |
| chr3 | 123347781 | 123352581 |
| chr3 | 123638070 | 123640504 |
| chr3 | 123707753 | 123708895 |
| chr3 | 12379703  | 12406081  |
| chr3 | 123931101 | 123944990 |
| chr3 | 123933672 | 123947319 |
| chr3 | 123933672 | 123949132 |
| chr3 | 123944848 | 123949132 |
| chr3 | 12405881  | 12417154  |
| chr3 | 124735092 | 124738239 |
| chr3 | 124740023 | 124742266 |
| chr3 | 124773689 | 124859446 |
| chr3 | 124796387 | 124809156 |
| chr3 | 124796387 | 124817710 |
| chr3 | 124817620 | 124848558 |
| chr3 | 124819738 | 124821474 |
| chr3 | 124841382 | 124848558 |
| chr3 | 12489783  | 12496554  |
| chr3 | 12489783  | 12505231  |

|      |           |           |
|------|-----------|-----------|
| chr3 | 12496517  | 12503784  |
| chr3 | 12496517  | 12505231  |
| chr3 | 125027204 | 125029488 |
| chr3 | 12503261  | 12519197  |
| chr3 | 12505153  | 12519197  |
| chr3 | 12516610  | 12519197  |
| chr3 | 125277725 | 125288228 |
| chr3 | 125277725 | 125313656 |
| chr3 | 125277725 | 125331238 |
| chr3 | 125288102 | 125331238 |
| chr3 | 12528887  | 12531659  |
| chr3 | 125313307 | 125323444 |
| chr3 | 125313307 | 125331238 |
| chr3 | 125323308 | 125331238 |
| chr3 | 125451304 | 125453955 |
| chr3 | 125451304 | 125460860 |
| chr3 | 125469453 | 125504744 |
| chr3 | 125489407 | 125504744 |
| chr3 | 125497340 | 125504744 |
| chr3 | 125560378 | 125567595 |
| chr3 | 125560378 | 125582978 |
| chr3 | 125576188 | 125582978 |
| chr3 | 125578959 | 125582978 |
| chr3 | 12570070  | 12572373  |
| chr3 | 12574791  | 12576741  |
| chr3 | 12599690  | 12600415  |
| chr3 | 12599690  | 12604289  |
| chr3 | 12599690  | 12606299  |
| chr3 | 12604135  | 12606299  |
| chr3 | 126050942 | 126068246 |
| chr3 | 12608765  | 12618747  |
| chr3 | 126459652 | 126472305 |
| chr3 | 126470894 | 126472305 |
| chr3 | 126621741 | 126622540 |
| chr3 | 126629378 | 126647296 |
| chr3 | 126642031 | 126647296 |
| chr3 | 126727077 | 126730630 |
| chr3 | 126727077 | 126733222 |
| chr3 | 127003329 | 127006178 |
| chr3 | 127003329 | 127007913 |
| chr3 | 127032386 | 127032836 |
| chr3 | 127676966 | 127677563 |
| chr3 | 127710575 | 127722566 |
| chr3 | 127710575 | 127781895 |
| chr3 | 128060101 | 128060661 |

|      |           |           |
|------|-----------|-----------|
| chr3 | 128087705 | 128119414 |
| chr3 | 128097299 | 128104924 |
| chr3 | 128246835 | 128264781 |
| chr3 | 128262127 | 128264781 |
| chr3 | 12839348  | 12840242  |
| chr3 | 128622163 | 128626832 |
| chr3 | 128629950 | 128632157 |
| chr3 | 128637798 | 128644983 |
| chr3 | 128795359 | 128798069 |
| chr3 | 128795359 | 128807671 |
| chr3 | 128806371 | 128807671 |
| chr3 | 128893554 | 128901349 |
| chr3 | 128902552 | 128904505 |
| chr3 | 129263903 | 129265792 |
| chr3 | 129265548 | 129267099 |
| chr3 | 12935447  | 12941865  |
| chr3 | 129458598 | 129464781 |
| chr3 | 129463559 | 129469417 |
| chr3 | 129583566 | 129589527 |
| chr3 | 129827802 | 129832826 |
| chr3 | 129827802 | 129880559 |
| chr3 | 129832773 | 129880559 |
| chr3 | 130684249 | 130708492 |
| chr3 | 130703722 | 130708492 |
| chr3 | 130716395 | 130730442 |
| chr3 | 130930415 | 130941699 |
| chr3 | 130930415 | 130956179 |
| chr3 | 130930415 | 130980679 |
| chr3 | 130953820 | 130956179 |
| chr3 | 130953820 | 130980679 |
| chr3 | 130967144 | 130969396 |
| chr3 | 130967144 | 130980679 |
| chr3 | 130967329 | 130975488 |
| chr3 | 130992950 | 131001344 |
| chr3 | 131109802 | 131133956 |
| chr3 | 131132744 | 131133956 |
| chr3 | 131152387 | 131170887 |
| chr3 | 131152387 | 131273574 |
| chr3 | 131162407 | 131170887 |
| chr3 | 131228527 | 131243496 |
| chr3 | 131468090 | 131471279 |
| chr3 | 131489980 | 131501715 |
| chr3 | 132446474 | 132450847 |
| chr3 | 132473144 | 132478140 |
| chr3 | 132483374 | 132484672 |

|      |           |           |
|------|-----------|-----------|
| chr3 | 132488297 | 132491051 |
| chr3 | 132499125 | 132500913 |
| chr3 | 132499125 | 132502468 |
| chr3 | 132525609 | 132531097 |
| chr3 | 132575771 | 132605205 |
| chr3 | 132576943 | 132605205 |
| chr3 | 132603228 | 132631479 |
| chr3 | 132618633 | 132631479 |
| chr3 | 132626690 | 132644896 |
| chr3 | 132639491 | 132644896 |
| chr3 | 132641971 | 132644896 |
| chr3 | 132704197 | 132705814 |
| chr3 | 132704197 | 132708257 |
| chr3 | 132713125 | 132716909 |
| chr3 | 13351878  | 13354107  |
| chr3 | 13351878  | 13388453  |
| chr3 | 133608534 | 133611141 |
| chr3 | 133608534 | 133612552 |
| chr3 | 133612388 | 133624175 |
| chr3 | 133616813 | 133649943 |
| chr3 | 133623090 | 133624175 |
| chr3 | 133628361 | 133628733 |
| chr3 | 133637875 | 133640170 |
| chr3 | 134175608 | 134183071 |
| chr3 | 134175608 | 134188923 |
| chr3 | 134175608 | 134191974 |
| chr3 | 134175608 | 134195182 |
| chr3 | 134175608 | 134202874 |
| chr3 | 134183001 | 134191974 |
| chr3 | 134183001 | 134195182 |
| chr3 | 134183001 | 134222539 |
| chr3 | 134188836 | 134191974 |
| chr3 | 134188836 | 134195182 |
| chr3 | 134188836 | 134202874 |
| chr3 | 134202729 | 134211607 |
| chr3 | 134202729 | 134222539 |
| chr3 | 134207471 | 134211607 |
| chr3 | 134207471 | 134222539 |
| chr3 | 134531844 | 134537268 |
| chr3 | 13500712  | 13502980  |
| chr3 | 136026831 | 136049361 |
| chr3 | 136082264 | 136106322 |
| chr3 | 136255855 | 136262065 |
| chr3 | 136260478 | 136262065 |
| chr3 | 136260478 | 136317064 |

|      |           |           |
|------|-----------|-----------|
| chr3 | 136283836 | 136317064 |
| chr3 | 136316940 | 136328857 |
| chr3 | 136326802 | 136328857 |
| chr3 | 136349157 | 136359296 |
| chr3 | 136357719 | 136377752 |
| chr3 | 136363365 | 136398829 |
| chr3 | 136369107 | 136377752 |
| chr3 | 136377659 | 136417972 |
| chr3 | 136377659 | 136423044 |
| chr3 | 136398748 | 136422613 |
| chr3 | 136398748 | 136422857 |
| chr3 | 136398748 | 136423044 |
| chr3 | 136398748 | 136477412 |
| chr3 | 136417884 | 136423044 |
| chr3 | 136417884 | 136477412 |
| chr3 | 136417884 | 136502779 |
| chr3 | 136421092 | 136433659 |
| chr3 | 136433555 | 136477412 |
| chr3 | 136433555 | 136502779 |
| chr3 | 136443286 | 136464988 |
| chr3 | 136443286 | 136473637 |
| chr3 | 136443286 | 136477412 |
| chr3 | 136443286 | 136502779 |
| chr3 | 136464880 | 136477412 |
| chr3 | 136464880 | 136502779 |
| chr3 | 136472412 | 136477412 |
| chr3 | 136542118 | 136630981 |
| chr3 | 136980465 | 136995556 |
| chr3 | 136989440 | 136995556 |
| chr3 | 138209816 | 138223733 |
| chr3 | 138209816 | 138245183 |
| chr3 | 138221925 | 138223733 |
| chr3 | 138221925 | 138229010 |
| chr3 | 138221925 | 138235114 |
| chr3 | 138263738 | 138273116 |
| chr3 | 138263738 | 138274544 |
| chr3 | 138272966 | 138284526 |
| chr3 | 138274448 | 138290639 |
| chr3 | 138525489 | 138532570 |
| chr3 | 138525489 | 138537347 |
| chr3 | 138570317 | 138571356 |
| chr3 | 138570317 | 138572914 |
| chr3 | 138570317 | 138572932 |
| chr3 | 138570317 | 138591956 |
| chr3 | 138621406 | 138622416 |

|      |           |           |
|------|-----------|-----------|
| chr3 | 138621406 | 138629156 |
| chr3 | 138657689 | 138665203 |
| chr3 | 138657689 | 138684803 |
| chr3 | 138663905 | 138684803 |
| chr3 | 138663905 | 138694907 |
| chr3 | 138663905 | 138699095 |
| chr3 | 138681966 | 138684803 |
| chr3 | 138681966 | 138688974 |
| chr3 | 138681966 | 138691143 |
| chr3 | 138681966 | 138694907 |
| chr3 | 138681966 | 138699095 |
| chr3 | 138683677 | 138688974 |
| chr3 | 138683677 | 138691143 |
| chr3 | 138683677 | 138694907 |
| chr3 | 138688874 | 138691143 |
| chr3 | 138688874 | 138694907 |
| chr3 | 138688874 | 138699095 |
| chr3 | 138690999 | 138699095 |
| chr3 | 138694785 | 138699095 |
| chr3 | 138698906 | 138707289 |
| chr3 | 138698906 | 138712304 |
| chr3 | 138698906 | 138714719 |
| chr3 | 138707158 | 138733438 |
| chr3 | 138733360 | 138737886 |
| chr3 | 138733360 | 138755979 |
| chr3 | 138733360 | 138759359 |
| chr3 | 138755753 | 138759359 |
| chr3 | 141260122 | 141287453 |
| chr3 | 141278341 | 141279504 |
| chr3 | 141278341 | 141287453 |
| chr3 | 141368620 | 141369946 |
| chr3 | 141368620 | 141381487 |
| chr3 | 141368620 | 141386937 |
| chr3 | 141368620 | 141404031 |
| chr3 | 141396258 | 141404031 |
| chr3 | 141512162 | 141540609 |
| chr3 | 141553856 | 141559995 |
| chr3 | 141555839 | 141559995 |
| chr3 | 141903619 | 141916020 |
| chr3 | 141907166 | 141922063 |
| chr3 | 141913651 | 141922063 |
| chr3 | 141959673 | 141978682 |
| chr3 | 141959673 | 141995141 |
| chr3 | 141974047 | 142093127 |
| chr3 | 141978519 | 141995141 |



|      |           |           |
|------|-----------|-----------|
| chr3 | 142054114 | 142101841 |
| chr3 | 142093060 | 142101841 |
| chr3 | 142170324 | 142177576 |
| chr3 | 142170324 | 142183049 |
| chr3 | 142170324 | 142198933 |
| chr3 | 142184710 | 142198933 |
| chr3 | 142185928 | 142198933 |
| chr3 | 142186451 | 142215692 |
| chr3 | 142347233 | 142359931 |
| chr3 | 142355400 | 142365366 |
| chr3 | 142355400 | 142370620 |
| chr3 | 142365046 | 142370620 |
| chr3 | 142365046 | 142403772 |
| chr3 | 142376478 | 142384685 |
| chr3 | 142397328 | 142400547 |
| chr3 | 142397328 | 142405076 |
| chr3 | 142417139 | 142423642 |
| chr3 | 142425221 | 142426841 |
| chr3 | 142465096 | 142468068 |
| chr3 | 142485139 | 142497192 |
| chr3 | 142493131 | 142498774 |
| chr3 | 142493131 | 142499718 |
| chr3 | 142512259 | 142536201 |
| chr3 | 142519668 | 142522841 |
| chr3 | 142558623 | 142560454 |
| chr3 | 142566120 | 142568154 |
| chr3 | 142664201 | 142671122 |
| chr3 | 142664201 | 142678113 |
| chr3 | 142669389 | 142671122 |
| chr3 | 142669389 | 142678113 |
| chr3 | 142736378 | 142743586 |
| chr3 | 142736378 | 142748460 |
| chr3 | 142736378 | 142781029 |
| chr3 | 142736378 | 142785040 |
| chr3 | 142736378 | 142791158 |
| chr3 | 142736378 | 142792967 |
| chr3 | 142736378 | 142804630 |
| chr3 | 142748257 | 142781029 |
| chr3 | 142748257 | 142785040 |
| chr3 | 142748257 | 142791158 |
| chr3 | 142748257 | 142792967 |
| chr3 | 142748257 | 142802344 |
| chr3 | 142777631 | 142785040 |
| chr3 | 142777631 | 142792967 |
| chr3 | 142802168 | 142804630 |

|      |           |           |
|------|-----------|-----------|
| chr3 | 143012221 | 143016975 |
| chr3 | 143021349 | 143028646 |
| chr3 | 143021472 | 143022662 |
| chr3 | 143038107 | 143043276 |
| chr3 | 14443623  | 14447816  |
| chr3 | 14443623  | 14466650  |
| chr3 | 14466515  | 14468212  |
| chr3 | 14466515  | 14481841  |
| chr3 | 146071041 | 146086908 |
| chr3 | 146076781 | 146091901 |
| chr3 | 146079115 | 146085273 |
| chr3 | 146081737 | 146085273 |
| chr3 | 146081737 | 146121248 |
| chr3 | 146086786 | 146091901 |
| chr3 | 146088585 | 146121248 |
| chr3 | 146102754 | 146110448 |
| chr3 | 146102754 | 146124229 |
| chr3 | 146110284 | 146124229 |
| chr3 | 146121111 | 146124229 |
| chr3 | 14654425  | 14661707  |
| chr3 | 148994141 | 148996904 |
| chr3 | 148994141 | 149009402 |
| chr3 | 148994141 | 149024272 |
| chr3 | 149059717 | 149060858 |
| chr3 | 149059717 | 149073322 |
| chr3 | 149063430 | 149064866 |
| chr3 | 149063430 | 149071657 |
| chr3 | 149063430 | 149076047 |
| chr3 | 149074214 | 149076047 |
| chr3 | 149145353 | 149155215 |
| chr3 | 149150598 | 149158846 |
| chr3 | 149160045 | 149163949 |
| chr3 | 149813924 | 149872154 |
| chr3 | 149846010 | 149872154 |
| chr3 | 149846010 | 149895560 |
| chr3 | 149846010 | 149902162 |
| chr3 | 149846010 | 149912083 |
| chr3 | 149846010 | 149921227 |
| chr3 | 149852515 | 149921227 |
| chr3 | 149852515 | 149960136 |
| chr3 | 149872028 | 149921227 |
| chr3 | 149895472 | 149912083 |
| chr3 | 149895472 | 149921227 |
| chr3 | 149902071 | 149921227 |
| chr3 | 15003875  | 15004613  |

|      |           |           |
|------|-----------|-----------|
| chr3 | 15003875  | 15013789  |
| chr3 | 15013588  | 15016254  |
| chr3 | 15016151  | 15030452  |
| chr3 | 15028585  | 15030452  |
| chr3 | 15032378  | 15034809  |
| chr3 | 150558387 | 150568292 |
| chr3 | 150562541 | 150568292 |
| chr3 | 150564298 | 150575762 |
| chr3 | 150575648 | 150581746 |
| chr3 | 150622384 | 150624899 |
| chr3 | 150706926 | 150708009 |
| chr3 | 15080731  | 15082608  |
| chr3 | 15080731  | 15085961  |
| chr3 | 15082366  | 15085961  |
| chr3 | 151116337 | 151122974 |
| chr3 | 151116337 | 151127984 |
| chr3 | 151127824 | 151193666 |
| chr3 | 151163892 | 151193666 |
| chr3 | 151185329 | 151193666 |
| chr3 | 151188353 | 151190931 |
| chr3 | 15212103  | 15218540  |
| chr3 | 15212103  | 15230535  |
| chr3 | 15217424  | 15220981  |
| chr3 | 15230441  | 15233973  |
| chr3 | 15232518  | 15247457  |
| chr3 | 15240472  | 15245671  |
| chr3 | 152414940 | 152432920 |
| chr3 | 152445281 | 152447773 |
| chr3 | 154129573 | 154194718 |
| chr3 | 15415497  | 15426635  |
| chr3 | 154187684 | 154194718 |
| chr3 | 154187684 | 154217958 |
| chr3 | 154194643 | 154240579 |
| chr3 | 154217868 | 154240579 |
| chr3 | 154284582 | 154295339 |
| chr3 | 154288865 | 154292694 |
| chr3 | 155114993 | 155118811 |
| chr3 | 15573158  | 15596424  |
| chr3 | 155767508 | 155802591 |
| chr3 | 155828181 | 155834041 |
| chr3 | 155828181 | 155842619 |
| chr3 | 155829687 | 155842619 |
| chr3 | 155833467 | 155834041 |
| chr3 | 155833467 | 155842619 |
| chr3 | 155893517 | 155898041 |

|      |           |           |
|------|-----------|-----------|
| chr3 | 155893517 | 155906263 |
| chr3 | 155893517 | 155911279 |
| chr3 | 155893517 | 155919338 |
| chr3 | 155893517 | 155931880 |
| chr3 | 155893517 | 155935046 |
| chr3 | 155897926 | 155906263 |
| chr3 | 155897926 | 155911279 |
| chr3 | 155903862 | 155911279 |
| chr3 | 155906159 | 155911279 |
| chr3 | 155906159 | 155916192 |
| chr3 | 155910691 | 155914570 |
| chr3 | 155910691 | 155925366 |
| chr3 | 155910691 | 155935046 |
| chr3 | 155914418 | 155919338 |
| chr3 | 155914418 | 155922302 |
| chr3 | 155919232 | 155925366 |
| chr3 | 155919232 | 155935046 |
| chr3 | 155922186 | 155925366 |
| chr3 | 156677656 | 156696025 |
| chr3 | 156694019 | 156696025 |
| chr3 | 15675897  | 15679563  |
| chr3 | 15675897  | 15690220  |
| chr3 | 15685225  | 15690220  |
| chr3 | 15707923  | 15711274  |
| chr3 | 157149286 | 157153156 |
| chr3 | 157149484 | 157152241 |
| chr3 | 15720914  | 15751820  |
| chr3 | 15735409  | 15737233  |
| chr3 | 15735409  | 15751820  |
| chr3 | 15735409  | 15766312  |
| chr3 | 158122102 | 158123991 |
| chr3 | 158122102 | 158203245 |
| chr3 | 158646164 | 158646947 |
| chr3 | 158646164 | 158653467 |
| chr3 | 158652095 | 158659059 |
| chr3 | 158652095 | 158684668 |
| chr3 | 158658921 | 158666386 |
| chr3 | 158658921 | 158682157 |
| chr3 | 158681994 | 158684668 |
| chr3 | 159866162 | 159888943 |
| chr3 | 159886206 | 159892190 |
| chr3 | 160277305 | 160280814 |
| chr3 | 160277305 | 160282613 |
| chr3 | 160277305 | 160319939 |
| chr3 | 160285803 | 160303989 |

|      |           |           |
|------|-----------|-----------|
| chr3 | 160300882 | 160319939 |
| chr3 | 160356012 | 160366152 |
| chr3 | 160356012 | 160377540 |
| chr3 | 160356012 | 160381718 |
| chr3 | 160356012 | 160384646 |
| chr3 | 160366042 | 160384646 |
| chr3 | 160375811 | 160381718 |
| chr3 | 160375811 | 160384646 |
| chr3 | 160423424 | 160423840 |
| chr3 | 160423424 | 160428942 |
| chr3 | 160424866 | 160428942 |
| chr3 | 160504957 | 160531557 |
| chr3 | 160514076 | 160535565 |
| chr3 | 160521778 | 160528039 |
| chr3 | 160521778 | 160531557 |
| chr3 | 161224929 | 161235212 |
| chr3 | 161233398 | 161242653 |
| chr3 | 161234726 | 161235212 |
| chr3 | 161234726 | 161238826 |
| chr3 | 161241045 | 161247330 |
| chr3 | 16269125  | 16271722  |
| chr3 | 16301625  | 16302748  |
| chr3 | 16377717  | 16434037  |
| chr3 | 167695595 | 167704895 |
| chr3 | 167695595 | 167720273 |
| chr3 | 167704841 | 167720273 |
| chr3 | 167704841 | 167725473 |
| chr3 | 167720061 | 167725473 |
| chr3 | 168036835 | 168041474 |
| chr3 | 168043378 | 168048365 |
| chr3 | 168309304 | 168314176 |
| chr3 | 170113359 | 170117476 |
| chr3 | 170113359 | 170122744 |
| chr3 | 170117225 | 170122744 |
| chr3 | 170122590 | 170129552 |
| chr3 | 170122590 | 170136665 |
| chr3 | 170122590 | 170149244 |
| chr3 | 170136418 | 170145521 |
| chr3 | 170136418 | 170178938 |
| chr3 | 170145422 | 170149244 |
| chr3 | 170145422 | 170172712 |
| chr3 | 170145422 | 170178938 |
| chr3 | 170149085 | 170178938 |
| chr3 | 170171372 | 170178938 |
| chr3 | 170235229 | 170280403 |

|      |           |           |
|------|-----------|-----------|
| chr3 | 170259968 | 170275287 |
| chr3 | 170259968 | 170280403 |
| chr3 | 170270420 | 170275287 |
| chr3 | 170270420 | 170280403 |
| chr3 | 170270420 | 170284596 |
| chr3 | 170280226 | 170284596 |
| chr3 | 170284460 | 170293508 |
| chr3 | 170284460 | 170299110 |
| chr3 | 170291853 | 170293508 |
| chr3 | 170291853 | 170297393 |
| chr3 | 170291853 | 170299110 |
| chr3 | 170293382 | 170297393 |
| chr3 | 170293382 | 170299110 |
| chr3 | 170359698 | 170381341 |
| chr3 | 170359698 | 170384765 |
| chr3 | 170359698 | 170390464 |
| chr3 | 170381243 | 170391260 |
| chr3 | 170384532 | 170390464 |
| chr3 | 170384532 | 170391260 |
| chr3 | 170390222 | 170391260 |
| chr3 | 171123595 | 171126151 |
| chr3 | 171188701 | 171194635 |
| chr3 | 171642839 | 171677694 |
| chr3 | 171674499 | 171692442 |
| chr3 | 17185108  | 17214370  |
| chr3 | 17185108  | 17258591  |
| chr3 | 172112451 | 172133546 |
| chr3 | 172112451 | 172226947 |
| chr3 | 172112451 | 172251541 |
| chr3 | 172133470 | 172247776 |
| chr3 | 172133470 | 172251541 |
| chr3 | 172133470 | 172333175 |
| chr3 | 172226870 | 172247776 |
| chr3 | 172226870 | 172251541 |
| chr3 | 172247532 | 172251541 |
| chr3 | 172247532 | 172285984 |
| chr3 | 172247532 | 172295514 |
| chr3 | 172247532 | 172298787 |
| chr3 | 172247532 | 172310881 |
| chr3 | 172251259 | 172310881 |
| chr3 | 172285925 | 172298787 |
| chr3 | 172285925 | 172310881 |
| chr3 | 172295362 | 172310881 |
| chr3 | 172295362 | 172353083 |
| chr3 | 172334943 | 172347361 |

|      |           |           |
|------|-----------|-----------|
| chr3 | 172362632 | 172381093 |
| chr3 | 172635915 | 172648114 |
| chr3 | 172645622 | 172648114 |
| chr3 | 172760155 | 172783909 |
| chr3 | 172761609 | 172783909 |
| chr3 | 172769006 | 172786574 |
| chr3 | 172773902 | 172783909 |
| chr3 | 172773902 | 172784803 |
| chr3 | 172773902 | 172786574 |
| chr3 | 172782162 | 172786574 |
| chr3 | 172786492 | 172807924 |
| chr3 | 17372074  | 17384015  |
| chr3 | 17383912  | 17428519  |
| chr3 | 17508473  | 17623913  |
| chr3 | 177046128 | 177065022 |
| chr3 | 177049996 | 177053918 |
| chr3 | 177049996 | 177065022 |
| chr3 | 179203543 | 179204588 |
| chr3 | 179378340 | 179378814 |
| chr3 | 179378584 | 179385721 |
| chr3 | 179385568 | 179386629 |
| chr3 | 179405189 | 179426242 |
| chr3 | 179413411 | 179419505 |
| chr3 | 179414884 | 179419505 |
| chr3 | 179416492 | 179426242 |
| chr3 | 179569823 | 179576913 |
| chr3 | 179592643 | 179598771 |
| chr3 | 179592643 | 179601790 |
| chr3 | 179614970 | 179618521 |
| chr3 | 179681877 | 179707076 |
| chr3 | 179681877 | 179708957 |
| chr3 | 179690240 | 179707076 |
| chr3 | 179690240 | 179708957 |
| chr3 | 179690240 | 179730709 |
| chr3 | 179690240 | 179761255 |
| chr3 | 179701007 | 179708957 |
| chr3 | 179706933 | 179721589 |
| chr3 | 179708772 | 179730709 |
| chr3 | 179719939 | 179721589 |
| chr3 | 179719939 | 179745217 |
| chr3 | 179730188 | 179730709 |
| chr3 | 179740246 | 179745217 |
| chr3 | 179740246 | 179765848 |
| chr3 | 179761111 | 179765848 |
| chr3 | 179761111 | 179781823 |

|      |           |           |
|------|-----------|-----------|
| chr3 | 179764001 | 179781823 |
| chr3 | 180602890 | 180606603 |
| chr3 | 180933333 | 180949343 |
| chr3 | 180933333 | 180953840 |
| chr3 | 180947864 | 180949343 |
| chr3 | 180951297 | 180953840 |
| chr3 | 180968050 | 180970358 |
| chr3 | 182828119 | 182837174 |
| chr3 | 182836034 | 182837174 |
| chr3 | 182836034 | 182848557 |
| chr3 | 182859161 | 182869151 |
| chr3 | 182884752 | 182887713 |
| chr3 | 182884752 | 182913994 |
| chr3 | 182889409 | 182913994 |
| chr3 | 182947237 | 182961356 |
| chr3 | 182947237 | 182965753 |
| chr3 | 182961225 | 182965753 |
| chr3 | 183037217 | 183041750 |
| chr3 | 183041566 | 183071357 |
| chr3 | 183057310 | 183071357 |
| chr3 | 183070998 | 183071357 |
| chr3 | 183086692 | 183092545 |
| chr3 | 183086692 | 183094605 |
| chr3 | 183205875 | 183207823 |
| chr3 | 183276871 | 183389779 |
| chr3 | 183309715 | 183318217 |
| chr3 | 183318067 | 183389779 |
| chr3 | 183323234 | 183389779 |
| chr3 | 183338799 | 183389779 |
| chr3 | 183379296 | 183389779 |
| chr3 | 183643479 | 183665039 |
| chr3 | 183643479 | 183672484 |
| chr3 | 183650295 | 183672484 |
| chr3 | 183663457 | 183672484 |
| chr3 | 183715143 | 183718592 |
| chr3 | 183715143 | 183722136 |
| chr3 | 183715143 | 183728851 |
| chr3 | 183717650 | 183728851 |
| chr3 | 183724418 | 183728851 |
| chr3 | 183724418 | 183747716 |
| chr3 | 183736717 | 183752253 |
| chr3 | 183736717 | 183754365 |
| chr3 | 183736717 | 183762279 |
| chr3 | 183747671 | 183762279 |
| chr3 | 183747671 | 183777700 |



|      |           |           |
|------|-----------|-----------|
| chr3 | 183747671 | 183786301 |
| chr3 | 183752072 | 183762279 |
| chr3 | 183754125 | 183756689 |
| chr3 | 183756527 | 183762279 |
| chr3 | 183761506 | 183762279 |
| chr3 | 183772304 | 183776123 |
| chr3 | 183772304 | 183777700 |
| chr3 | 183772304 | 183786301 |
| chr3 | 183775914 | 183790980 |
| chr3 | 183777541 | 183790980 |
| chr3 | 183797922 | 183801528 |
| chr3 | 183797922 | 183807092 |
| chr3 | 183833491 | 183833825 |
| chr3 | 183833491 | 183868060 |
| chr3 | 183840569 | 183844326 |
| chr3 | 183840569 | 183868060 |
| chr3 | 183844230 | 183868060 |
| chr3 | 183862752 | 183868060 |
| chr3 | 183927329 | 183938060 |
| chr3 | 183937900 | 183947510 |
| chr3 | 183937900 | 183961654 |
| chr3 | 183942726 | 183947510 |
| chr3 | 183963384 | 183967766 |
| chr3 | 183967694 | 183977624 |
| chr3 | 183977516 | 183978651 |
| chr3 | 184140079 | 184140730 |
| chr3 | 184142501 | 184142886 |
| chr3 | 184163656 | 184168065 |
| chr3 | 184180848 | 184182248 |
| chr3 | 184181695 | 184182868 |
| chr3 | 184181911 | 184182868 |
| chr3 | 184244600 | 184245812 |
| chr3 | 184305767 | 184306834 |
| chr3 | 184315762 | 184317497 |
| chr3 | 184317320 | 184317816 |
| chr3 | 184324877 | 184328990 |
| chr3 | 184327829 | 184328756 |
| chr3 | 184358681 | 184359131 |
| chr3 | 184824544 | 184826231 |
| chr3 | 184824544 | 184850022 |
| chr3 | 184824544 | 184863067 |
| chr3 | 184824544 | 184894925 |
| chr3 | 184824544 | 184898654 |
| chr3 | 184849070 | 184855818 |
| chr3 | 184849070 | 184869528 |

|      |           |           |
|------|-----------|-----------|
| chr3 | 184852499 | 184869528 |
| chr3 | 184886109 | 184900972 |
| chr3 | 184886109 | 184999861 |
| chr3 | 184900920 | 184920198 |
| chr3 | 184913518 | 184920198 |
| chr3 | 184913518 | 184930568 |
| chr3 | 184924861 | 184971752 |
| chr3 | 184924861 | 184983094 |
| chr3 | 184924861 | 184999861 |
| chr3 | 184936245 | 184957521 |
| chr3 | 184936245 | 184966713 |
| chr3 | 184936245 | 184971752 |
| chr3 | 184936245 | 184983094 |
| chr3 | 184936245 | 184999861 |
| chr3 | 184936245 | 185024389 |
| chr3 | 184957373 | 184966713 |
| chr3 | 184957373 | 184971752 |
| chr3 | 184957373 | 184983094 |
| chr3 | 184964467 | 184983094 |
| chr3 | 184964467 | 184999861 |
| chr3 | 184982565 | 184999861 |
| chr3 | 185437446 | 185443636 |
| chr3 | 185437446 | 185451395 |
| chr3 | 185494622 | 185496981 |
| chr3 | 185590113 | 185600855 |
| chr3 | 185590113 | 185609350 |
| chr3 | 185598411 | 185613408 |
| chr3 | 185598411 | 185614740 |
| chr3 | 185598411 | 185626393 |
| chr3 | 185600764 | 185613408 |
| chr3 | 185614563 | 185621905 |
| chr3 | 185617479 | 185624082 |
| chr3 | 185619298 | 185621905 |
| chr3 | 185619298 | 185626393 |
| chr3 | 185672540 | 185675913 |
| chr3 | 185672540 | 185689627 |
| chr3 | 185687056 | 185689627 |
| chr3 | 185687056 | 185692762 |
| chr3 | 185687056 | 185698347 |
| chr3 | 185692698 | 185698347 |
| chr3 | 185919436 | 185923984 |
| chr3 | 185921103 | 185922126 |
| chr3 | 185921103 | 185923984 |
| chr3 | 186057074 | 186066072 |
| chr3 | 186079816 | 186081175 |

|      |           |           |
|------|-----------|-----------|
| chr3 | 186079816 | 186105942 |
| chr3 | 186105304 | 186105942 |
| chr3 | 186551128 | 186558572 |
| chr3 | 186784563 | 186785101 |
| chr3 | 186784563 | 186786051 |
| chr3 | 186786501 | 186787264 |
| chr3 | 186786501 | 186787584 |
| chr3 | 186787126 | 186787584 |
| chr3 | 186787126 | 186787882 |
| chr3 | 186791724 | 186792947 |
| chr3 | 186791724 | 186794777 |
| chr3 | 186791724 | 186804724 |
| chr3 | 186797534 | 186804724 |
| chr3 | 186801116 | 186804724 |
| chr3 | 186963784 | 187043310 |
| chr3 | 186963784 | 187051346 |
| chr3 | 187038741 | 187051346 |
| chr3 | 188406111 | 188524787 |
| chr3 | 189207375 | 189238909 |
| chr3 | 189215291 | 189238909 |
| chr3 | 189238732 | 189310539 |
| chr3 | 189983045 | 189989038 |
| chr3 | 189986787 | 189995442 |
| chr3 | 190550341 | 190564353 |
| chr3 | 190604127 | 190609181 |
| chr3 | 190608994 | 190629498 |
| chr3 | 191357087 | 191361159 |
| chr3 | 191357087 | 191370036 |
| chr3 | 191357087 | 191380932 |
| chr3 | 192335360 | 192360538 |
| chr3 | 193643372 | 193664996 |
| chr3 | 194425341 | 194431892 |
| chr3 | 194427074 | 194437573 |
| chr3 | 194429677 | 194431892 |
| chr3 | 194430942 | 194438972 |
| chr3 | 194433771 | 194437573 |
| chr3 | 194433771 | 194441461 |
| chr3 | 194433771 | 194450276 |
| chr3 | 194433771 | 194454392 |
| chr3 | 194437094 | 194448009 |
| chr3 | 194444724 | 194448009 |
| chr3 | 194446926 | 194457174 |
| chr3 | 194448456 | 194454392 |
| chr3 | 194455892 | 194462236 |
| chr3 | 194459470 | 194462236 |

|      |           |           |
|------|-----------|-----------|
| chr3 | 194604286 | 194611020 |
| chr3 | 194610915 | 194615697 |
| chr3 | 194610915 | 194617269 |
| chr3 | 194623223 | 194628509 |
| chr3 | 194644572 | 194646243 |
| chr3 | 194658956 | 194660133 |
| chr3 | 194665556 | 194666572 |
| chr3 | 195156448 | 195226856 |
| chr3 | 195289120 | 195320813 |
| chr3 | 195291705 | 195336976 |
| chr3 | 195294718 | 195297281 |
| chr3 | 195294718 | 195320813 |
| chr3 | 195295707 | 195302174 |
| chr3 | 195295707 | 195308837 |
| chr3 | 195295707 | 195345317 |
| chr3 | 195301574 | 195302174 |
| chr3 | 195306510 | 195308837 |
| chr3 | 195306510 | 195320813 |
| chr3 | 195306510 | 195333123 |
| chr3 | 195306510 | 195345317 |
| chr3 | 195320700 | 195345317 |
| chr3 | 195326884 | 195345317 |
| chr3 | 195342470 | 195345317 |
| chr3 | 195342470 | 195392147 |
| chr3 | 195381008 | 195392147 |
| chr3 | 195523691 | 195524896 |
| chr3 | 195668518 | 195673987 |
| chr3 | 195668518 | 195677848 |
| chr3 | 195671131 | 195673987 |
| chr3 | 195724679 | 195729739 |
| chr3 | 195866888 | 195888606 |
| chr3 | 195878252 | 195888606 |
| chr3 | 195963299 | 195982310 |
| chr3 | 195974396 | 195979866 |
| chr3 | 195979743 | 195982310 |
| chr3 | 196053417 | 196058632 |
| chr3 | 196053417 | 196060247 |
| chr3 | 196055079 | 196060247 |
| chr3 | 196058283 | 196060247 |
| chr3 | 196058283 | 196062939 |
| chr3 | 196058283 | 196065600 |
| chr3 | 196058283 | 196077122 |
| chr3 | 196062581 | 196065600 |
| chr3 | 196064308 | 196065600 |
| chr3 | 196064308 | 196077122 |

|      |           |           |
|------|-----------|-----------|
| chr3 | 196065442 | 196077122 |
| chr3 | 196067517 | 196077122 |
| chr3 | 196069454 | 196071498 |
| chr3 | 196069454 | 196074125 |
| chr3 | 196069454 | 196077122 |
| chr3 | 196071395 | 196077122 |
| chr3 | 196072002 | 196075360 |
| chr3 | 196072002 | 196077122 |
| chr3 | 196073929 | 196075360 |
| chr3 | 196073929 | 196077122 |
| chr3 | 196075158 | 196077122 |
| chr3 | 196241947 | 196248323 |
| chr3 | 196247366 | 196248323 |
| chr3 | 196257787 | 196270541 |
| chr3 | 196257787 | 196283538 |
| chr3 | 196270414 | 196283538 |
| chr3 | 196323743 | 196324440 |
| chr3 | 196323743 | 196327591 |
| chr3 | 196361843 | 196362687 |
| chr3 | 196361843 | 196368155 |
| chr3 | 196361843 | 196372042 |
| chr3 | 196361843 | 196403019 |
| chr3 | 196362293 | 196369511 |
| chr3 | 196362293 | 196393619 |
| chr3 | 196368027 | 196369511 |
| chr3 | 196368027 | 196372042 |
| chr3 | 196368027 | 196403019 |
| chr3 | 196369420 | 196372042 |
| chr3 | 196369420 | 196403019 |
| chr3 | 196371895 | 196403019 |
| chr3 | 196391812 | 196393619 |
| chr3 | 196391812 | 196403019 |
| chr3 | 196391812 | 196407393 |
| chr3 | 196402951 | 196407393 |
| chr3 | 196475230 | 196488683 |
| chr3 | 196483769 | 196487578 |
| chr3 | 196483769 | 196488683 |
| chr3 | 196487398 | 196488683 |
| chr3 | 196722414 | 196731092 |
| chr3 | 196782625 | 196803164 |
| chr3 | 196782625 | 196805383 |
| chr3 | 196801926 | 196803164 |
| chr3 | 196801926 | 196805383 |
| chr3 | 196805351 | 196807914 |
| chr3 | 196806578 | 196807914 |

|      |           |           |
|------|-----------|-----------|
| chr3 | 196806578 | 196818156 |
| chr3 | 196810589 | 196814568 |
| chr3 | 196810589 | 196818156 |
| chr3 | 196812218 | 196814568 |
| chr3 | 196812218 | 196820567 |
| chr3 | 196814450 | 196818156 |
| chr3 | 196814450 | 196820567 |
| chr3 | 196818056 | 196820567 |
| chr3 | 196899665 | 196900412 |
| chr3 | 196899665 | 196903610 |
| chr3 | 197003900 | 197006736 |
| chr3 | 197003900 | 197009812 |
| chr3 | 197015364 | 197016369 |
| chr3 | 197015364 | 197017290 |
| chr3 | 197051576 | 197059998 |
| chr3 | 197051576 | 197066754 |
| chr3 | 197051576 | 197069260 |
| chr3 | 197065275 | 197081117 |
| chr3 | 197076585 | 197091026 |
| chr3 | 197081050 | 197085756 |
| chr3 | 197081050 | 197119530 |
| chr3 | 197085579 | 197105005 |
| chr3 | 197085579 | 197116083 |
| chr3 | 197085579 | 197119530 |
| chr3 | 197090911 | 197119530 |
| chr3 | 197090911 | 197130671 |
| chr3 | 197104902 | 197116083 |
| chr3 | 197104902 | 197119530 |
| chr3 | 197104902 | 197130671 |
| chr3 | 197104902 | 197149796 |
| chr3 | 197115926 | 197119530 |
| chr3 | 197115926 | 197142768 |
| chr3 | 197115926 | 197149796 |
| chr3 | 197119409 | 197142768 |
| chr3 | 197130526 | 197149796 |
| chr3 | 197136541 | 197142768 |
| chr3 | 197136541 | 197149796 |
| chr3 | 197136541 | 197161738 |
| chr3 | 197149742 | 197194589 |
| chr3 | 197282678 | 197297235 |
| chr3 | 197532411 | 197546486 |
| chr3 | 197693714 | 197694585 |
| chr3 | 197694374 | 197705175 |
| chr3 | 197704541 | 197705175 |
| chr3 | 197756425 | 197768587 |

|      |           |           |
|------|-----------|-----------|
| chr3 | 197756425 | 197770244 |
| chr3 | 197756425 | 197778464 |
| chr3 | 197773402 | 197778464 |
| chr3 | 197814907 | 197820430 |
| chr3 | 197814907 | 197829673 |
| chr3 | 197814907 | 197832317 |
| chr3 | 197817175 | 197820430 |
| chr3 | 197826877 | 197832317 |
| chr3 | 197830769 | 197839397 |
| chr3 | 197830769 | 197866219 |
| chr3 | 197832196 | 197839397 |
| chr3 | 197832196 | 197866219 |
| chr3 | 197835673 | 197865471 |
| chr3 | 197847408 | 197848021 |
| chr3 | 197847408 | 197852620 |
| chr3 | 197858833 | 197866219 |
| chr3 | 197990558 | 197996282 |
| chr3 | 19975600  | 19976169  |
| chr3 | 19975642  | 19978403  |
| chr3 | 20119597  | 20148487  |
| chr3 | 20125904  | 20140364  |
| chr3 | 20176600  | 20184034  |
| chr3 | 20183607  | 20184034  |
| chr3 | 23208691  | 23217312  |
| chr3 | 23499607  | 23532701  |
| chr3 | 23900807  | 23911450  |
| chr3 | 23910810  | 23911450  |
| chr3 | 23954536  | 23956125  |
| chr3 | 23954536  | 23959815  |
| chr3 | 23954536  | 23968023  |
| chr3 | 23956036  | 23959815  |
| chr3 | 25629034  | 25630939  |
| chr3 | 25638164  | 25642385  |
| chr3 | 25643693  | 25645455  |
| chr3 | 25751097  | 25778688  |
| chr3 | 25764065  | 25778688  |
| chr3 | 27201509  | 27284961  |
| chr3 | 27344271  | 27352919  |
| chr3 | 27379248  | 27391808  |
| chr3 | 27379248  | 27403384  |
| chr3 | 27383152  | 27391808  |
| chr3 | 27389930  | 27398353  |
| chr3 | 27394517  | 27395115  |
| chr3 | 27394517  | 27403384  |
| chr3 | 27397683  | 27403384  |

|      |          |          |
|------|----------|----------|
| chr3 | 27404829 | 27421779 |
| chr3 | 27411641 | 27424152 |
| chr3 | 27411641 | 27434104 |
| chr3 | 27418485 | 27424152 |
| chr3 | 27418485 | 27434104 |
| chr3 | 27420699 | 27434104 |
| chr3 | 27421621 | 27424152 |
| chr3 | 27424036 | 27452498 |
| chr3 | 27433915 | 27452498 |
| chr3 | 27437387 | 27448797 |
| chr3 | 27437387 | 27452498 |
| chr3 | 27448650 | 27452498 |
| chr3 | 29868857 | 29897475 |
| chr3 | 29868857 | 29899755 |
| chr3 | 29868857 | 29936196 |
| chr3 | 29988142 | 29991209 |
| chr3 | 30644746 | 30650460 |
| chr3 | 30644746 | 30674246 |
| chr3 | 30671637 | 30674246 |
| chr3 | 3137259  | 3140648  |
| chr3 | 3137259  | 3144710  |
| chr3 | 3140509  | 3144710  |
| chr3 | 3156218  | 3174261  |
| chr3 | 31576395 | 31580096 |
| chr3 | 31576395 | 31600459 |
| chr3 | 31596797 | 31633147 |
| chr3 | 31615104 | 31619830 |
| chr3 | 31615104 | 31633147 |
| chr3 | 3167633  | 3174261  |
| chr3 | 3167633  | 3175269  |
| chr3 | 31683633 | 31702508 |
| chr3 | 31876432 | 31879830 |
| chr3 | 32128075 | 32146734 |
| chr3 | 32138586 | 32140366 |
| chr3 | 32138586 | 32146734 |
| chr3 | 32357372 | 32367988 |
| chr3 | 32487937 | 32491886 |
| chr3 | 32528445 | 32533097 |
| chr3 | 32532985 | 32537104 |
| chr3 | 32532985 | 32541206 |
| chr3 | 32534510 | 32541206 |
| chr3 | 32541036 | 32545965 |
| chr3 | 32703867 | 32704972 |
| chr3 | 32703867 | 32708820 |
| chr3 | 32716224 | 32717237 |



|      |          |          |
|------|----------|----------|
| chr3 | 32716224 | 32737490 |
| chr3 | 32733422 | 32734976 |
| chr3 | 32733422 | 32737490 |
| chr3 | 32762732 | 32764809 |
| chr3 | 33014055 | 33018561 |
| chr3 | 33014055 | 33046232 |
| chr3 | 33051757 | 33068970 |
| chr3 | 33053490 | 33072713 |
| chr3 | 33065462 | 33072713 |
| chr3 | 33068229 | 33068970 |
| chr3 | 33068229 | 33072713 |
| chr3 | 33120343 | 33134265 |
| chr3 | 33124407 | 33134265 |
| chr3 | 33358966 | 33364719 |
| chr3 | 33392562 | 33425741 |
| chr3 | 33400188 | 33425741 |
| chr3 | 33408689 | 33425741 |
| chr3 | 33409235 | 33425741 |
| chr3 | 33411580 | 33425741 |
| chr3 | 33535232 | 33584920 |
| chr3 | 33543432 | 33559385 |
| chr3 | 33551251 | 33604209 |
| chr3 | 33573109 | 33584920 |
| chr3 | 33576168 | 33584920 |
| chr3 | 33581820 | 33584920 |
| chr3 | 33581820 | 33592496 |
| chr3 | 33581820 | 33604209 |
| chr3 | 33584749 | 33604209 |
| chr3 | 33592394 | 33604209 |
| chr3 | 33592394 | 33608626 |
| chr3 | 33592394 | 33644903 |
| chr3 | 33592394 | 33663515 |
| chr3 | 33602951 | 33632374 |
| chr3 | 33602951 | 33644903 |
| chr3 | 33602951 | 33663515 |
| chr3 | 33602951 | 33696933 |
| chr3 | 33604153 | 33608626 |
| chr3 | 33606590 | 33608626 |
| chr3 | 33606590 | 33612071 |
| chr3 | 33606590 | 33644903 |
| chr3 | 33619602 | 33632371 |
| chr3 | 33619602 | 33632374 |
| chr3 | 33619602 | 33644903 |
| chr3 | 33619602 | 33663515 |
| chr3 | 33619602 | 33689932 |

|      |          |          |
|------|----------|----------|
| chr3 | 33626987 | 33644903 |
| chr3 | 33626987 | 33663515 |
| chr3 | 33632291 | 33663515 |
| chr3 | 33644756 | 33689932 |
| chr3 | 33644756 | 33696933 |
| chr3 | 33663444 | 33689932 |
| chr3 | 33663444 | 33696933 |
| chr3 | 33684358 | 33689932 |
| chr3 | 33684358 | 33696933 |
| chr3 | 33687059 | 33689932 |
| chr3 | 33813558 | 33826580 |
| chr3 | 33855165 | 33865430 |
| chr3 | 36996618 | 37007063 |
| chr3 | 36996618 | 37017599 |
| chr3 | 36996623 | 37026007 |
| chr3 | 37006990 | 37012099 |
| chr3 | 37020309 | 37026007 |
| chr3 | 37047518 | 37049017 |
| chr3 | 37075023 | 37096660 |
| chr3 | 37083635 | 37096660 |
| chr3 | 37121491 | 37149038 |
| chr3 | 37129062 | 37149038 |
| chr3 | 37251394 | 37282272 |
| chr3 | 37251394 | 37289291 |
| chr3 | 37273535 | 37282272 |
| chr3 | 37273535 | 37289291 |
| chr3 | 37273535 | 37296219 |
| chr3 | 37281957 | 37302332 |
| chr3 | 37286013 | 37299371 |
| chr3 | 37286013 | 37302332 |
| chr3 | 37289234 | 37296219 |
| chr3 | 37294978 | 37296219 |
| chr3 | 37302184 | 37315598 |
| chr3 | 37335052 | 37340199 |
| chr3 | 37335052 | 37347296 |
| chr3 | 37335052 | 37355187 |
| chr3 | 37337142 | 37355187 |
| chr3 | 37411137 | 37417492 |
| chr3 | 37947056 | 37975894 |
| chr3 | 37964570 | 37975894 |
| chr3 | 38008234 | 38009811 |
| chr3 | 38183002 | 38198863 |
| chr3 | 38183002 | 38236961 |
| chr3 | 38190730 | 38216151 |
| chr3 | 38221577 | 38230430 |

|      |          |          |
|------|----------|----------|
| chr3 | 38223811 | 38230430 |
| chr3 | 38372654 | 38400985 |
| chr3 | 38379245 | 38400985 |
| chr3 | 38501354 | 38506968 |
| chr3 | 39063049 | 39068859 |
| chr3 | 39069642 | 39084741 |
| chr3 | 39408605 | 39410999 |
| chr3 | 39411648 | 39412061 |
| chr3 | 40310892 | 40311571 |
| chr3 | 41224020 | 41224753 |
| chr3 | 41224020 | 41227352 |
| chr3 | 41224020 | 41239354 |
| chr3 | 41398078 | 41455595 |
| chr3 | 41566024 | 41717861 |
| chr3 | 41681507 | 41681804 |
| chr3 | 41681507 | 41717861 |
| chr3 | 41681507 | 41754488 |
| chr3 | 41705056 | 41717861 |
| chr3 | 41705056 | 41754488 |
| chr3 | 41705253 | 41754488 |
| chr3 | 41715236 | 41717861 |
| chr3 | 41789660 | 41835971 |
| chr3 | 41789660 | 41954807 |
| chr3 | 41800131 | 41835971 |
| chr3 | 41835863 | 41935940 |
| chr3 | 41883873 | 41919818 |
| chr3 | 41895517 | 41932006 |
| chr3 | 41895517 | 41935940 |
| chr3 | 41896821 | 41900829 |
| chr3 | 41931843 | 41938197 |
| chr3 | 41931843 | 41954807 |
| chr3 | 42184684 | 42189124 |
| chr3 | 42184684 | 42191636 |
| chr3 | 42555929 | 42563686 |
| chr3 | 42617569 | 42621516 |
| chr3 | 42619019 | 42632823 |
| chr3 | 42621428 | 42632823 |
| chr3 | 43299753 | 43303792 |
| chr3 | 43299753 | 43332310 |
| chr3 | 43299753 | 43343478 |
| chr3 | 43332168 | 43343478 |
| chr3 | 43549719 | 43561402 |
| chr3 | 43549719 | 43565727 |
| chr3 | 43549719 | 43574864 |
| chr3 | 43549719 | 43577261 |

|      |          |          |
|------|----------|----------|
| chr3 | 43561219 | 43574864 |
| chr3 | 43561219 | 43600581 |
| chr3 | 43565652 | 43577261 |
| chr3 | 43565652 | 43580472 |
| chr3 | 43574808 | 43577261 |
| chr3 | 43574808 | 43580472 |
| chr3 | 43576691 | 43580472 |
| chr3 | 43598531 | 43605863 |
| chr3 | 4410864  | 4420146  |
| chr3 | 4410864  | 4453049  |
| chr3 | 44354738 | 44401334 |
| chr3 | 44367455 | 44401334 |
| chr3 | 44455120 | 44458364 |
| chr3 | 4449265  | 4453049  |
| chr3 | 44629064 | 44631221 |
| chr3 | 44629064 | 44632599 |
| chr3 | 44629073 | 44631221 |
| chr3 | 44629073 | 44632599 |
| chr3 | 44775253 | 44800437 |
| chr3 | 44775253 | 44805986 |
| chr3 | 44778114 | 44828300 |
| chr3 | 44780884 | 44786574 |
| chr3 | 44780884 | 44797956 |
| chr3 | 44780884 | 44800437 |
| chr3 | 44784844 | 44794426 |
| chr3 | 44784844 | 44801526 |
| chr3 | 44794216 | 44797956 |
| chr3 | 44801449 | 44812289 |
| chr3 | 44813074 | 44840456 |
| chr3 | 44814910 | 44828300 |
| chr3 | 44826038 | 44828300 |
| chr3 | 44826374 | 44840456 |
| chr3 | 44828213 | 44838421 |
| chr3 | 44829970 | 44831018 |
| chr3 | 44829970 | 44840456 |
| chr3 | 44929305 | 44933984 |
| chr3 | 44929305 | 44959460 |
| chr3 | 44945167 | 44959460 |
| chr3 | 45089053 | 45091538 |
| chr3 | 45089053 | 45093657 |
| chr3 | 45093276 | 45095568 |
| chr3 | 45110472 | 45112445 |
| chr3 | 45110472 | 45118621 |
| chr3 | 4516475  | 4521094  |
| chr3 | 45394432 | 45419729 |

|      |          |          |
|------|----------|----------|
| chr3 | 45400244 | 45419729 |
| chr3 | 45400244 | 45446980 |
| chr3 | 45400244 | 45458886 |
| chr3 | 45474242 | 45500579 |
| chr3 | 45496274 | 45513235 |
| chr3 | 45703437 | 45709647 |
| chr3 | 45703437 | 45723543 |
| chr3 | 45703437 | 45732151 |
| chr3 | 45721999 | 45723543 |
| chr3 | 4674201  | 4675248  |
| chr3 | 46999629 | 47001179 |
| chr3 | 47037665 | 47042700 |
| chr3 | 47037665 | 47046621 |
| chr3 | 47037665 | 47057490 |
| chr3 | 47037665 | 47062346 |
| chr3 | 47037665 | 47067118 |
| chr3 | 47042560 | 47057490 |
| chr3 | 47046486 | 47057490 |
| chr3 | 47046486 | 47067118 |
| chr3 | 47056820 | 47067118 |
| chr3 | 47062162 | 47067118 |
| chr3 | 47067069 | 47098081 |
| chr3 | 47083719 | 47098081 |
| chr3 | 47086194 | 47098081 |
| chr3 | 47086194 | 47103423 |
| chr3 | 47086194 | 47106120 |
| chr3 | 47097954 | 47103423 |
| chr3 | 47097954 | 47106120 |
| chr3 | 47105996 | 47116754 |
| chr3 | 47113875 | 47116754 |
| chr3 | 47113875 | 47126663 |
| chr3 | 47423932 | 47428670 |
| chr3 | 47425484 | 47428670 |
| chr3 | 47425484 | 47435137 |
| chr3 | 47425996 | 47428670 |
| chr3 | 47427156 | 47428670 |
| chr3 | 47435007 | 47443091 |
| chr3 | 47498285 | 47501851 |
| chr3 | 47498285 | 47511226 |
| chr3 | 47610065 | 47622341 |
| chr3 | 47610065 | 47638780 |
| chr3 | 47610065 | 47678311 |
| chr3 | 47638724 | 47678311 |
| chr3 | 47661293 | 47676782 |
| chr3 | 47661293 | 47678311 |

|      |          |          |
|------|----------|----------|
| chr3 | 47661293 | 47686170 |
| chr3 | 47661293 | 47693300 |
| chr3 | 47662333 | 47675588 |
| chr3 | 47662333 | 47678311 |
| chr3 | 47670657 | 47676782 |
| chr3 | 47670657 | 47678311 |
| chr3 | 47675474 | 47676782 |
| chr3 | 47675474 | 47678311 |
| chr3 | 47675474 | 47686170 |
| chr3 | 47678197 | 47686170 |
| chr3 | 47678197 | 47701402 |
| chr3 | 47686048 | 47693300 |
| chr3 | 47686048 | 47701402 |
| chr3 | 47689386 | 47729094 |
| chr3 | 47693240 | 47701402 |
| chr3 | 47693240 | 47714490 |
| chr3 | 47701277 | 47714490 |
| chr3 | 47701277 | 47729094 |
| chr3 | 47706408 | 47714490 |
| chr3 | 47706408 | 47720735 |
| chr3 | 47706408 | 47729094 |
| chr3 | 47706408 | 47736126 |
| chr3 | 47706408 | 47772936 |
| chr3 | 47710682 | 47714490 |
| chr3 | 47710682 | 47720735 |
| chr3 | 47710682 | 47745993 |
| chr3 | 47710682 | 47772936 |
| chr3 | 47714414 | 47745993 |
| chr3 | 47714414 | 47772936 |
| chr3 | 47720665 | 47745993 |
| chr3 | 47720665 | 47772936 |
| chr3 | 47729024 | 47745993 |
| chr3 | 47729024 | 47772936 |
| chr3 | 47736033 | 47745993 |
| chr3 | 47736033 | 47772936 |
| chr3 | 47738028 | 47745993 |
| chr3 | 47738028 | 47772936 |
| chr3 | 47745907 | 47772936 |
| chr3 | 47818021 | 47829134 |
| chr3 | 47840876 | 47843255 |
| chr3 | 47853162 | 47977933 |
| chr3 | 47867245 | 47869327 |
| chr3 | 47867245 | 47872100 |
| chr3 | 47867245 | 47877523 |
| chr3 | 47870812 | 47872100 |

|      |          |          |
|------|----------|----------|
| chr3 | 47870812 | 47877523 |
| chr3 | 47918718 | 47921878 |
| chr3 | 47977864 | 47998879 |
| chr3 | 48167845 | 48177988 |
| chr3 | 48174283 | 48177988 |
| chr3 | 48174283 | 48183030 |
| chr3 | 48174283 | 48183836 |
| chr3 | 48180720 | 48184695 |
| chr3 | 48450036 | 48451899 |
| chr3 | 48450036 | 48454418 |
| chr3 | 48450036 | 48459916 |
| chr3 | 48535511 | 48536463 |
| chr3 | 48535511 | 48550234 |
| chr3 | 48543579 | 48550234 |
| chr3 | 48549863 | 48550234 |
| chr3 | 48599634 | 48605856 |
| chr3 | 48689537 | 48691482 |
| chr3 | 48756378 | 48794049 |
| chr3 | 48756378 | 48807684 |
| chr3 | 48765003 | 48783092 |
| chr3 | 48765003 | 48794049 |
| chr3 | 48765003 | 48807684 |
| chr3 | 48765247 | 48794049 |
| chr3 | 48772954 | 48794049 |
| chr3 | 48772954 | 48807684 |
| chr3 | 48782985 | 48794049 |
| chr3 | 48782985 | 48807684 |
| chr3 | 48922747 | 48927813 |
| chr3 | 48927461 | 48980496 |
| chr3 | 48979481 | 48980496 |
| chr3 | 49016773 | 49017356 |
| chr3 | 49024895 | 49025269 |
| chr3 | 49024895 | 49028806 |
| chr3 | 49032182 | 49033228 |
| chr3 | 49032182 | 49092456 |
| chr3 | 49044389 | 49057890 |
| chr3 | 49044389 | 49077038 |
| chr3 | 49056861 | 49077038 |
| chr3 | 49098191 | 49103409 |
| chr3 | 49113991 | 49118120 |
| chr3 | 49283986 | 49284919 |
| chr3 | 49286097 | 49298635 |
| chr3 | 49292509 | 49294598 |
| chr3 | 49300466 | 49302542 |
| chr3 | 49302383 | 49311654 |

|      |          |          |
|------|----------|----------|
| chr3 | 49305714 | 49311654 |
| chr3 | 49305714 | 49325845 |
| chr3 | 49305714 | 49327816 |
| chr3 | 49324701 | 49325845 |
| chr3 | 49324701 | 49327816 |
| chr3 | 49368427 | 49375591 |
| chr3 | 49839771 | 49844580 |
| chr3 | 49967469 | 49975392 |
| chr3 | 49967469 | 49999513 |
| chr3 | 49967469 | 50048319 |
| chr3 | 49972058 | 49999513 |
| chr3 | 50048244 | 50059746 |
| chr3 | 50059648 | 50062108 |
| chr3 | 50060955 | 50062108 |
| chr3 | 50065030 | 50066502 |
| chr3 | 50068689 | 50070552 |
| chr3 | 50092042 | 50093875 |
| chr3 | 50093719 | 50105709 |
| chr3 | 50099981 | 50105709 |
| chr3 | 50105076 | 50110770 |
| chr3 | 50106766 | 50108304 |
| chr3 | 50106766 | 50109688 |
| chr3 | 50106766 | 50114251 |
| chr3 | 50113382 | 50114251 |
| chr3 | 50117073 | 50117379 |
| chr3 | 50173792 | 50175188 |
| chr3 | 50173792 | 50176861 |
| chr3 | 50252099 | 50253184 |
| chr3 | 50252099 | 50257714 |
| chr3 | 50256191 | 50257714 |
| chr3 | 50288408 | 50290679 |
| chr3 | 50288799 | 50289628 |
| chr3 | 50640365 | 50642332 |
| chr3 | 50640365 | 50647203 |
| chr3 | 50778674 | 50934077 |
| chr3 | 50890025 | 51075440 |
| chr3 | 51146548 | 51160702 |
| chr3 | 51159243 | 51160702 |
| chr3 | 51208773 | 51229609 |
| chr3 | 51208773 | 51246807 |
| chr3 | 51260155 | 51271007 |
| chr3 | 51270814 | 51280204 |
| chr3 | 51280105 | 51333253 |
| chr3 | 51310231 | 51374587 |
| chr3 | 51416786 | 51418876 |



|      |          |          |
|------|----------|----------|
| chr3 | 51418115 | 51420997 |
| chr3 | 51427371 | 51433264 |
| chr3 | 51429260 | 51430212 |
| chr3 | 51429260 | 51433264 |
| chr3 | 51433105 | 51441897 |
| chr3 | 51440969 | 51441897 |
| chr3 | 51440969 | 51443903 |
| chr3 | 51443765 | 51466876 |
| chr3 | 51463113 | 51483836 |
| chr3 | 51470928 | 51483836 |
| chr3 | 51470928 | 51496780 |
| chr3 | 51627552 | 51630931 |
| chr3 | 51629333 | 51635789 |
| chr3 | 51630271 | 51630931 |
| chr3 | 51633576 | 51634035 |
| chr3 | 51674270 | 51684634 |
| chr3 | 5170502  | 5172740  |
| chr3 | 5170502  | 5174414  |
| chr3 | 5172149  | 5172740  |
| chr3 | 5195208  | 5207273  |
| chr3 | 5195208  | 5208263  |
| chr3 | 5195208  | 5211216  |
| chr3 | 52122378 | 52125181 |
| chr3 | 52122378 | 52138302 |
| chr3 | 52122378 | 52151100 |
| chr3 | 52202506 | 52208247 |
| chr3 | 52204692 | 52206751 |
| chr3 | 52204692 | 52212420 |
| chr3 | 52412810 | 52414587 |
| chr3 | 52576540 | 52579199 |
| chr3 | 52576540 | 52589255 |
| chr3 | 52634601 | 52642045 |
| chr3 | 52634601 | 52643343 |
| chr3 | 52634601 | 52648442 |
| chr3 | 52641953 | 52648442 |
| chr3 | 52658198 | 52679723 |
| chr3 | 52678499 | 52679723 |
| chr3 | 52686768 | 52687615 |
| chr3 | 52686768 | 52689206 |
| chr3 | 52687245 | 52690704 |
| chr3 | 52687501 | 52690704 |
| chr3 | 52690591 | 52691071 |
| chr3 | 52692871 | 52693807 |
| chr3 | 52693407 | 52694103 |
| chr3 | 52695927 | 52700496 |

|      |          |          |
|------|----------|----------|
| chr3 | 52737585 | 52739634 |
| chr3 | 52737585 | 52741499 |
| chr3 | 52737585 | 52752336 |
| chr3 | 52743351 | 52746904 |
| chr3 | 52743351 | 52752336 |
| chr3 | 52744238 | 52766375 |
| chr3 | 52749691 | 52752336 |
| chr3 | 52760794 | 52766375 |
| chr3 | 52763469 | 52766375 |
| chr3 | 52911002 | 52916214 |
| chr3 | 52912537 | 52913617 |
| chr3 | 52912537 | 52916214 |
| chr3 | 52912537 | 52931035 |
| chr3 | 52918483 | 52928341 |
| chr3 | 52920536 | 52928341 |
| chr3 | 52926030 | 52928341 |
| chr3 | 52930328 | 52932308 |
| chr3 | 52943352 | 52954411 |
| chr3 | 52943352 | 52969258 |
| chr3 | 52954316 | 52969258 |
| chr3 | 53178403 | 53179776 |
| chr3 | 53178403 | 53183581 |
| chr3 | 53225750 | 53242242 |
| chr3 | 53228275 | 53242242 |
| chr3 | 53240250 | 53242242 |
| chr3 | 53290790 | 53292827 |
| chr3 | 53290790 | 53304290 |
| chr3 | 53874210 | 53876080 |
| chr3 | 53874210 | 53878467 |
| chr3 | 55888388 | 55992250 |
| chr3 | 56080816 | 56173520 |
| chr3 | 56139508 | 56149132 |
| chr3 | 56558845 | 56564125 |
| chr3 | 56563683 | 56567053 |
| chr3 | 56563683 | 56571302 |
| chr3 | 56566593 | 56567053 |
| chr3 | 56566949 | 56571302 |
| chr3 | 56592969 | 56594028 |
| chr3 | 56624478 | 56641752 |
| chr3 | 56627036 | 56628614 |
| chr3 | 56638705 | 56641752 |
| chr3 | 56638705 | 56649057 |
| chr3 | 56648821 | 56673725 |
| chr3 | 56660730 | 56671692 |
| chr3 | 56660730 | 56673725 |

|      |          |          |
|------|----------|----------|
| chr3 | 56662384 | 56670145 |
| chr3 | 56663540 | 56673725 |
| chr3 | 56666259 | 56673725 |
| chr3 | 56668396 | 56673725 |
| chr3 | 56669699 | 56671692 |
| chr3 | 56669699 | 56673725 |
| chr3 | 57235565 | 57242914 |
| chr3 | 57242855 | 57248351 |
| chr3 | 57242855 | 57253738 |
| chr3 | 57242855 | 57267792 |
| chr3 | 57246075 | 57248351 |
| chr3 | 57246075 | 57253738 |
| chr3 | 57247394 | 57253738 |
| chr3 | 57575547 | 57577387 |
| chr3 | 57575547 | 57584464 |
| chr3 | 57583897 | 57584464 |
| chr3 | 57630420 | 57633354 |
| chr3 | 57641652 | 57646438 |
| chr3 | 57657679 | 57663716 |
| chr3 | 57657679 | 57672438 |
| chr3 | 57659117 | 57663716 |
| chr3 | 57663635 | 57672438 |
| chr3 | 57831382 | 57849816 |
| chr3 | 57831382 | 57864716 |
| chr3 | 57841298 | 57858159 |
| chr3 | 57847196 | 57858159 |
| chr3 | 57847196 | 57862086 |
| chr3 | 57847196 | 57864716 |
| chr3 | 57871635 | 57896932 |
| chr3 | 57890040 | 57923023 |
| chr3 | 57907883 | 57923023 |
| chr3 | 57916905 | 57923023 |
| chr3 | 58077045 | 58081776 |
| chr3 | 58077045 | 58098908 |
| chr3 | 58094835 | 58096218 |
| chr3 | 58094835 | 58098908 |
| chr3 | 58106679 | 58121503 |
| chr3 | 58118871 | 58121503 |
| chr3 | 58132807 | 58163330 |
| chr3 | 58145920 | 58150227 |
| chr3 | 58256561 | 58267345 |
| chr3 | 58256561 | 58274815 |
| chr3 | 58365873 | 58382700 |
| chr3 | 58369430 | 58391847 |
| chr3 | 58429707 | 58430942 |

|      |          |          |
|------|----------|----------|
| chr3 | 58431592 | 58431984 |
| chr3 | 58806394 | 58831889 |
| chr3 | 58913707 | 58937762 |
| chr3 | 61989624 | 62003497 |
| chr3 | 62078162 | 62168163 |
| chr3 | 62157066 | 62168163 |
| chr3 | 62191468 | 62195170 |
| chr3 | 62191468 | 62203950 |
| chr3 | 62218850 | 62262894 |
| chr3 | 63835153 | 63839773 |
| chr3 | 63898398 | 63913225 |
| chr3 | 63898398 | 63952483 |
| chr3 | 63912587 | 63913225 |
| chr3 | 63912587 | 63952483 |
| chr3 | 64018598 | 64022523 |
| chr3 | 65361198 | 65364946 |
| chr3 | 65361198 | 65383623 |
| chr3 | 65429519 | 65442849 |
| chr3 | 66236543 | 66243312 |
| chr3 | 66236543 | 66263379 |
| chr3 | 66243202 | 66263379 |
| chr3 | 66405197 | 66417266 |
| chr3 | 66405197 | 66462509 |
| chr3 | 66412870 | 66417266 |
| chr3 | 67495797 | 67498295 |
| chr3 | 67495797 | 67508903 |
| chr3 | 67495797 | 67520634 |
| chr3 | 67495797 | 67529186 |
| chr3 | 67495797 | 67609596 |
| chr3 | 67508806 | 67529186 |
| chr3 | 67518246 | 67529186 |
| chr3 | 67518246 | 67609596 |
| chr3 | 67528131 | 67529186 |
| chr3 | 68998010 | 69004482 |
| chr3 | 69001607 | 69004482 |
| chr3 | 69029814 | 69035115 |
| chr3 | 69033547 | 69044595 |
| chr3 | 69039550 | 69044595 |
| chr3 | 69042806 | 69044595 |
| chr3 | 69043749 | 69048562 |
| chr3 | 69057255 | 69077918 |
| chr3 | 69063438 | 69077918 |
| chr3 | 69064067 | 69075510 |
| chr3 | 69071534 | 69077918 |
| chr3 | 70976940 | 70978029 |

|      |          |          |
|------|----------|----------|
| chr3 | 70987993 | 71015653 |
| chr3 | 70987993 | 71053773 |
| chr3 | 71015548 | 71047095 |
| chr3 | 71015548 | 71053773 |
| chr3 | 71041327 | 71053773 |
| chr3 | 71041327 | 71359244 |
| chr3 | 71690009 | 71699708 |
| chr3 | 72792915 | 72817384 |
| chr3 | 72792915 | 72824551 |
| chr3 | 72792915 | 72842402 |
| chr3 | 72792915 | 72844423 |
| chr3 | 72812670 | 72817384 |
| chr3 | 72812670 | 72824551 |
| chr3 | 72812670 | 72844423 |
| chr3 | 72815349 | 72844423 |
| chr3 | 72817229 | 72842402 |
| chr3 | 72817229 | 72844423 |
| chr3 | 72824423 | 72844423 |
| chr3 | 72832368 | 72844423 |
| chr3 | 72841044 | 72842402 |
| chr3 | 72841044 | 72844423 |
| chr3 | 72955097 | 72957352 |
| chr3 | 75741275 | 75741736 |
| chr3 | 78646147 | 78717883 |
| chr3 | 78667882 | 78714524 |
| chr3 | 78670095 | 78685917 |
| chr3 | 78685745 | 78717883 |
| chr3 | 78714396 | 78717883 |
| chr3 | 81577924 | 81581275 |
| chr3 | 81577924 | 81586190 |
| chr3 | 81577924 | 81591164 |
| chr3 | 81577924 | 81594023 |
| chr3 | 81577924 | 81642990 |
| chr3 | 81577924 | 81649921 |
| chr3 | 81577924 | 81670953 |
| chr3 | 81577924 | 81705613 |
| chr3 | 81591036 | 81648991 |
| chr3 | 81591036 | 81705613 |
| chr3 | 81642780 | 81705613 |
| chr3 | 81670837 | 81705613 |
| chr3 | 8532736  | 8537440  |
| chr3 | 87240698 | 87245908 |
| chr3 | 8767265  | 8768591  |
| chr3 | 8890388  | 8913720  |
| chr3 | 8898893  | 8902520  |

|      |          |          |
|------|----------|----------|
| chr3 | 8898893  | 8913720  |
| chr3 | 8912311  | 8941804  |
| chr3 | 8935870  | 8941804  |
| chr3 | 8935870  | 8959001  |
| chr3 | 9365015  | 9366985  |
| chr3 | 9365015  | 9371536  |
| chr3 | 9366907  | 9371536  |
| chr3 | 93995873 | 94003908 |
| chr3 | 94049405 | 94053300 |
| chr3 | 9424466  | 9434485  |
| chr3 | 9424466  | 9435906  |
| chr3 | 9424466  | 9442245  |
| chr3 | 9424466  | 9448630  |
| chr3 | 9424466  | 9464672  |
| chr3 | 9428822  | 9434882  |
| chr3 | 9434333  | 9475156  |
| chr3 | 9443307  | 9445740  |
| chr3 | 9453738  | 9464672  |
| chr3 | 9662266  | 9671170  |
| chr3 | 9662266  | 9672758  |
| chr3 | 9669431  | 9671170  |
| chr3 | 96866824 | 96987993 |
| chr3 | 9734130  | 9739958  |
| chr3 | 9750944  | 9751949  |
| chr3 | 9750944  | 9754885  |
| chr3 | 97843194 | 97864647 |
| chr3 | 97886630 | 97889390 |
| chr3 | 97895958 | 97900485 |
| chr3 | 97895958 | 97915736 |
| chr3 | 97947360 | 97959179 |
| chr3 | 97949843 | 97959179 |
| chr3 | 9797658  | 9801756  |
| chr3 | 9816073  | 9817759  |
| chr3 | 9840183  | 9840616  |
| chr3 | 9840183  | 9843601  |
| chr3 | 98756368 | 98772916 |
| chr3 | 98756368 | 98773983 |
| chr3 | 98768429 | 98773983 |
| chr3 | 98817768 | 98881767 |
| chr3 | 98849460 | 98881767 |
| chr3 | 9948066  | 9948469  |
| chr3 | 9973627  | 9977446  |
| chr4 | 10083021 | 10084530 |
| chr4 | 10097710 | 10099139 |
| chr4 | 10097710 | 10103986 |

|      |           |           |
|------|-----------|-----------|
| chr4 | 10097710  | 10116234  |
| chr4 | 101080531 | 101099722 |
| chr4 | 101080531 | 101109078 |
| chr4 | 101093775 | 101109078 |
| chr4 | 102304316 | 102315830 |
| chr4 | 102525511 | 102537956 |
| chr4 | 102525511 | 102567135 |
| chr4 | 102533844 | 102567135 |
| chr4 | 102576875 | 102584820 |
| chr4 | 102580534 | 102582957 |
| chr4 | 102664684 | 102674070 |
| chr4 | 102664684 | 102714561 |
| chr4 | 102668962 | 102726683 |
| chr4 | 102689573 | 102726683 |
| chr4 | 102714437 | 102726683 |
| chr4 | 102722870 | 102726683 |
| chr4 | 102799406 | 102802638 |
| chr4 | 102799406 | 102809855 |
| chr4 | 102799406 | 102826636 |
| chr4 | 103028746 | 103047226 |
| chr4 | 103048892 | 103067592 |
| chr4 | 103066326 | 103067592 |
| chr4 | 103194228 | 103196252 |
| chr4 | 105241338 | 105243778 |
| chr4 | 105370836 | 105399164 |
| chr4 | 105370836 | 105438036 |
| chr4 | 105386566 | 105399164 |
| chr4 | 105386566 | 105438036 |
| chr4 | 105396248 | 105424322 |
| chr4 | 105396248 | 105438036 |
| chr4 | 105424195 | 105446502 |
| chr4 | 105424195 | 105449403 |
| chr4 | 105424195 | 105453642 |
| chr4 | 105424195 | 105456745 |
| chr4 | 105437949 | 105449403 |
| chr4 | 105437949 | 105456745 |
| chr4 | 105446382 | 105453642 |
| chr4 | 105446382 | 105456745 |
| chr4 | 105691975 | 105693486 |
| chr4 | 105691975 | 105695668 |
| chr4 | 105693298 | 105695668 |
| chr4 | 105693298 | 105700014 |
| chr4 | 105719059 | 105729499 |
| chr4 | 105719059 | 105842134 |
| chr4 | 105822953 | 105825800 |

|      |           |           |
|------|-----------|-----------|
| chr4 | 106171094 | 106212835 |
| chr4 | 106171094 | 106236808 |
| chr4 | 106171094 | 106242569 |
| chr4 | 106171094 | 106308989 |
| chr4 | 106193608 | 106212835 |
| chr4 | 106193608 | 106242569 |
| chr4 | 106212749 | 106236808 |
| chr4 | 106230362 | 106236808 |
| chr4 | 106242469 | 106262212 |
| chr4 | 106260436 | 106308989 |
| chr4 | 106295093 | 106308989 |
| chr4 | 106324984 | 106331883 |
| chr4 | 106324984 | 106337037 |
| chr4 | 107631630 | 107645070 |
| chr4 | 107631630 | 107701285 |
| chr4 | 107644801 | 107660072 |
| chr4 | 107644801 | 107701285 |
| chr4 | 107682014 | 107687177 |
| chr4 | 107682014 | 107694006 |
| chr4 | 107682014 | 107701285 |
| chr4 | 107687038 | 107701285 |
| chr4 | 107693770 | 107701285 |
| chr4 | 107944969 | 107947537 |
| chr4 | 108009758 | 108014588 |
| chr4 | 108009758 | 108027760 |
| chr4 | 108655563 | 108657647 |
| chr4 | 109449416 | 109463644 |
| chr4 | 109462900 | 109494856 |
| chr4 | 109473003 | 109481781 |
| chr4 | 109481676 | 109494856 |
| chr4 | 109491326 | 109494856 |
| chr4 | 109491326 | 109510111 |
| chr4 | 109491326 | 109512083 |
| chr4 | 109491326 | 109516640 |
| chr4 | 109506327 | 109513856 |
| chr4 | 109506327 | 109516640 |
| chr4 | 109513746 | 109520484 |
| chr4 | 109513746 | 109530464 |
| chr4 | 109521116 | 109521626 |
| chr4 | 109527321 | 109533685 |
| chr4 | 109530288 | 109531522 |
| chr4 | 109659010 | 109664394 |
| chr4 | 109943841 | 109945275 |
| chr4 | 110488540 | 110491164 |
| chr4 | 112253207 | 112260862 |



|      |           |           |
|------|-----------|-----------|
| chr4 | 112558149 | 112563274 |
| chr4 | 112560732 | 112585725 |
| chr4 | 112562370 | 112585725 |
| chr4 | 112562370 | 112589874 |
| chr4 | 112603523 | 112633242 |
| chr4 | 112606007 | 112620190 |
| chr4 | 113174415 | 113199109 |
| chr4 | 113292415 | 113360897 |
| chr4 | 113293439 | 113346022 |
| chr4 | 113302766 | 113318620 |
| chr4 | 113457290 | 113465604 |
| chr4 | 113500462 | 113517657 |
| chr4 | 113509637 | 113531299 |
| chr4 | 113509637 | 113552096 |
| chr4 | 113531215 | 113548729 |
| chr4 | 118282830 | 118298938 |
| chr4 | 118308435 | 118318556 |
| chr4 | 118313200 | 118316323 |
| chr4 | 118313200 | 118318556 |
| chr4 | 118313200 | 118338314 |
| chr4 | 118331715 | 118338314 |
| chr4 | 118605583 | 118608722 |
| chr4 | 118728560 | 118732912 |
| chr4 | 118815027 | 118815726 |
| chr4 | 119245336 | 119248882 |
| chr4 | 119267319 | 119269837 |
| chr4 | 119460182 | 119462979 |
| chr4 | 119460730 | 119462979 |
| chr4 | 119493332 | 119497903 |
| chr4 | 119596522 | 119607297 |
| chr4 | 120710308 | 120811449 |
| chr4 | 120754552 | 120799745 |
| chr4 | 120754552 | 120811449 |
| chr4 | 120754552 | 120816574 |
| chr4 | 120777187 | 120821345 |
| chr4 | 120811369 | 120821345 |
| chr4 | 1212912   | 1241519   |
| chr4 | 1215990   | 1241519   |
| chr4 | 121677893 | 121681761 |
| chr4 | 121677893 | 121686372 |
| chr4 | 121801826 | 121810099 |
| chr4 | 121804621 | 121810099 |
| chr4 | 121807539 | 121811671 |
| chr4 | 122189999 | 122201126 |
| chr4 | 122189999 | 122207265 |

|      |           |           |
|------|-----------|-----------|
| chr4 | 122192228 | 122207638 |
| chr4 | 122219339 | 122220470 |
| chr4 | 122262763 | 122266958 |
| chr4 | 122272159 | 122289192 |
| chr4 | 122272159 | 122301397 |
| chr4 | 122279774 | 122281774 |
| chr4 | 1225359   | 1228343   |
| chr4 | 1225359   | 1238337   |
| chr4 | 1225359   | 1241519   |
| chr4 | 1228198   | 1241519   |
| chr4 | 122912567 | 122917704 |
| chr4 | 122927633 | 122938249 |
| chr4 | 122927633 | 122979386 |
| chr4 | 122927633 | 123028395 |
| chr4 | 122933438 | 122938249 |
| chr4 | 122933438 | 122979386 |
| chr4 | 122935713 | 122938249 |
| chr4 | 122935713 | 122979386 |
| chr4 | 122935713 | 123028395 |
| chr4 | 122979231 | 123028395 |
| chr4 | 122979231 | 123090705 |
| chr4 | 123028185 | 123057288 |
| chr4 | 123028185 | 123090705 |
| chr4 | 123056386 | 123090705 |
| chr4 | 1238182   | 1241519   |
| chr4 | 124668983 | 124678905 |
| chr4 | 125463562 | 125481738 |
| chr4 | 127663380 | 127687867 |
| chr4 | 127669035 | 127687867 |
| chr4 | 127794076 | 127798709 |
| chr4 | 127805072 | 127811636 |
| chr4 | 127811436 | 127822894 |
| chr4 | 127889865 | 127893881 |
| chr4 | 127889865 | 127895093 |
| chr4 | 127921523 | 127939997 |
| chr4 | 127930682 | 127933093 |
| chr4 | 127930682 | 127938838 |
| chr4 | 127930682 | 127942158 |
| chr4 | 127982938 | 128028853 |
| chr4 | 128017362 | 128028853 |
| chr4 | 128074459 | 128077962 |
| chr4 | 128074459 | 128082305 |
| chr4 | 128074459 | 128091144 |
| chr4 | 128074459 | 128091512 |
| chr4 | 128074459 | 128098330 |

|      |           |           |
|------|-----------|-----------|
| chr4 | 128074459 | 128107313 |
| chr4 | 128074933 | 128082305 |
| chr4 | 128077787 | 128091512 |
| chr4 | 128091000 | 128091512 |
| chr4 | 128091000 | 128098330 |
| chr4 | 128114569 | 128178642 |
| chr4 | 128121825 | 128162317 |
| chr4 | 128162193 | 128179512 |
| chr4 | 128176871 | 128179512 |
| chr4 | 128179405 | 128207383 |
| chr4 | 128466607 | 128470549 |
| chr4 | 128831732 | 128852268 |
| chr4 | 128831732 | 128862225 |
| chr4 | 128842952 | 128852268 |
| chr4 | 128888678 | 128946152 |
| chr4 | 128936654 | 128943188 |
| chr4 | 128936654 | 128946152 |
| chr4 | 128936654 | 128948570 |
| chr4 | 128959599 | 128999794 |
| chr4 | 128992166 | 128999794 |
| chr4 | 128992166 | 129003876 |
| chr4 | 128992166 | 129039096 |
| chr4 | 128997873 | 129003876 |
| chr4 | 129039040 | 129044051 |
| chr4 | 129039040 | 129082373 |
| chr4 | 129043394 | 129082373 |
| chr4 | 130787    | 131505    |
| chr4 | 1311978   | 1315600   |
| chr4 | 1311978   | 1322503   |
| chr4 | 1311978   | 1327703   |
| chr4 | 13376544  | 13460828  |
| chr4 | 13460698  | 13479526  |
| chr4 | 1348089   | 1351835   |
| chr4 | 1348089   | 1366431   |
| chr4 | 1349523   | 1366431   |
| chr4 | 13586395  | 13597168  |
| chr4 | 138214584 | 138236451 |
| chr4 | 139060323 | 139073567 |
| chr4 | 139061864 | 139073567 |
| chr4 | 139071865 | 139073567 |
| chr4 | 139125163 | 139137867 |
| chr4 | 139334173 | 139341069 |
| chr4 | 139334173 | 139344339 |
| chr4 | 139336847 | 139341069 |
| chr4 | 139336847 | 139344339 |

|      |           |           |
|------|-----------|-----------|
| chr4 | 139342825 | 139344339 |
| chr4 | 139342825 | 139349581 |
| chr4 | 139342825 | 139370404 |
| chr4 | 139349461 | 139354098 |
| chr4 | 139351190 | 139351611 |
| chr4 | 139351190 | 139354098 |
| chr4 | 139354025 | 139357555 |
| chr4 | 139376364 | 139386230 |
| chr4 | 139378755 | 139386230 |
| chr4 | 139517884 | 139520394 |
| chr4 | 139517884 | 139523435 |
| chr4 | 139517884 | 139533366 |
| chr4 | 139529030 | 139533366 |
| chr4 | 139695196 | 139704196 |
| chr4 | 139703454 | 139704196 |
| chr4 | 140525419 | 140540301 |
| chr4 | 140525419 | 140543586 |
| chr4 | 140676893 | 140679843 |
| chr4 | 141226766 | 141230270 |
| chr4 | 142082030 | 142086256 |
| chr4 | 142082030 | 142112682 |
| chr4 | 142082030 | 142124760 |
| chr4 | 142108092 | 142124760 |
| chr4 | 142108092 | 142145996 |
| chr4 | 142145839 | 142173809 |
| chr4 | 142173631 | 142270774 |
| chr4 | 142193086 | 142209026 |
| chr4 | 142208424 | 142314762 |
| chr4 | 142237863 | 142260564 |
| chr4 | 142270662 | 142305537 |
| chr4 | 142305457 | 142405324 |
| chr4 | 142402937 | 142431385 |
| chr4 | 143197822 | 143203566 |
| chr4 | 143203407 | 143212424 |
| chr4 | 143415476 | 143440382 |
| chr4 | 143433490 | 143440382 |
| chr4 | 143524366 | 143528714 |
| chr4 | 143525450 | 143530526 |
| chr4 | 143527867 | 143528714 |
| chr4 | 143527867 | 143530526 |
| chr4 | 143534854 | 143536678 |
| chr4 | 143543508 | 143543972 |
| chr4 | 145104385 | 145105690 |
| chr4 | 145110967 | 145121391 |
| chr4 | 145123020 | 145125101 |

|      |           |           |
|------|-----------|-----------|
| chr4 | 145139950 | 145155686 |
| chr4 | 145155410 | 145171720 |
| chr4 | 145159502 | 145171720 |
| chr4 | 145162639 | 145171720 |
| chr4 | 145539803 | 145546924 |
| chr4 | 145823421 | 145849561 |
| chr4 | 145845955 | 145849561 |
| chr4 | 145845955 | 145892415 |
| chr4 | 145870244 | 145903215 |
| chr4 | 145885677 | 145892415 |
| chr4 | 146442782 | 146510049 |
| chr4 | 146503848 | 146510049 |
| chr4 | 147653851 | 147661038 |
| chr4 | 147670640 | 147680471 |
| chr4 | 147822726 | 147822957 |
| chr4 | 147847150 | 147881932 |
| chr4 | 147847150 | 147906719 |
| chr4 | 147857552 | 147866816 |
| chr4 | 147857552 | 147875150 |
| chr4 | 147857552 | 147881932 |
| chr4 | 147857552 | 147913139 |
| chr4 | 147864845 | 147881932 |
| chr4 | 147864845 | 147913139 |
| chr4 | 147864845 | 147966839 |
| chr4 | 147875020 | 147881932 |
| chr4 | 147879231 | 147881932 |
| chr4 | 147906637 | 147913139 |
| chr4 | 147906637 | 147939899 |
| chr4 | 147906637 | 147955374 |
| chr4 | 147909731 | 147946704 |
| chr4 | 147909731 | 147955374 |
| chr4 | 147909731 | 147966839 |
| chr4 | 147939824 | 147946704 |
| chr4 | 147939824 | 147955374 |
| chr4 | 147939824 | 147966839 |
| chr4 | 147939824 | 148047051 |
| chr4 | 147946616 | 147966839 |
| chr4 | 147946616 | 148023413 |
| chr4 | 147955315 | 147966839 |
| chr4 | 147965023 | 147966839 |
| chr4 | 147965023 | 148023413 |
| chr4 | 148023262 | 148047051 |
| chr4 | 148063147 | 148064507 |
| chr4 | 148152468 | 148154901 |
| chr4 | 15007304  | 15033211  |

|      |           |           |
|------|-----------|-----------|
| chr4 | 150193137 | 150203889 |
| chr4 | 150277852 | 150310384 |
| chr4 | 150282449 | 150286034 |
| chr4 | 150282449 | 150310384 |
| chr4 | 150302624 | 150325898 |
| chr4 | 150302624 | 150491035 |
| chr4 | 150415437 | 150491035 |
| chr4 | 150467672 | 150491035 |
| chr4 | 150467672 | 150599131 |
| chr4 | 15052413  | 15062260  |
| chr4 | 150588047 | 150599131 |
| chr4 | 150588047 | 150683717 |
| chr4 | 150599006 | 150761847 |
| chr4 | 150683550 | 150808398 |
| chr4 | 150683550 | 150849575 |
| chr4 | 150735257 | 150761847 |
| chr4 | 150735257 | 150808398 |
| chr4 | 150735257 | 150817257 |
| chr4 | 150735257 | 150872755 |
| chr4 | 150735257 | 150896456 |
| chr4 | 150735257 | 150897818 |
| chr4 | 150761782 | 150808398 |
| chr4 | 150761782 | 150817257 |
| chr4 | 150798080 | 150808398 |
| chr4 | 150798080 | 150817257 |
| chr4 | 150798080 | 150831976 |
| chr4 | 150798080 | 150848998 |
| chr4 | 150798080 | 150849575 |
| chr4 | 150806270 | 150808398 |
| chr4 | 150806270 | 150817257 |
| chr4 | 150806270 | 150831976 |
| chr4 | 150806270 | 150849575 |
| chr4 | 150817123 | 150831976 |
| chr4 | 150817123 | 150848998 |
| chr4 | 150844099 | 150872755 |
| chr4 | 150844657 | 150850902 |
| chr4 | 150850723 | 150868305 |
| chr4 | 150870524 | 150872755 |
| chr4 | 150870524 | 150893149 |
| chr4 | 150870524 | 150897818 |
| chr4 | 150893051 | 150921293 |
| chr4 | 150896393 | 150916738 |
| chr4 | 150914194 | 150916738 |
| chr4 | 150928515 | 150929065 |
| chr4 | 151127617 | 151128356 |

|      |           |           |
|------|-----------|-----------|
| chr4 | 151132330 | 151135132 |
| chr4 | 151132330 | 151137862 |
| chr4 | 151143909 | 151149561 |
| chr4 | 151147921 | 151149561 |
| chr4 | 151174669 | 151179397 |
| chr4 | 151701328 | 151708101 |
| chr4 | 152329671 | 152337936 |
| chr4 | 152330731 | 152337936 |
| chr4 | 152332595 | 152337936 |
| chr4 | 152332595 | 152350124 |
| chr4 | 152337801 | 152350124 |
| chr4 | 152829624 | 152872564 |
| chr4 | 152829624 | 152888307 |
| chr4 | 152863605 | 152888307 |
| chr4 | 152872451 | 152888307 |
| chr4 | 152880962 | 152888307 |
| chr4 | 153270334 | 153276130 |
| chr4 | 153270337 | 153276130 |
| chr4 | 153350063 | 153358622 |
| chr4 | 153350063 | 153409015 |
| chr4 | 153394261 | 153397333 |
| chr4 | 153550072 | 153558368 |
| chr4 | 153626146 | 153632838 |
| chr4 | 15536919  | 15563522  |
| chr4 | 15550823  | 15563522  |
| chr4 | 15574149  | 15589679  |
| chr4 | 155774967 | 155794086 |
| chr4 | 15625251  | 15636676  |
| chr4 | 15625251  | 15644708  |
| chr4 | 15630665  | 15644708  |
| chr4 | 15636493  | 15644708  |
| chr4 | 156850220 | 156861489 |
| chr4 | 157120555 | 157143959 |
| chr4 | 157120555 | 157153010 |
| chr4 | 157136468 | 157153010 |
| chr4 | 158215190 | 158217420 |
| chr4 | 158215190 | 158219390 |
| chr4 | 158684591 | 158690425 |
| chr4 | 158690347 | 158697699 |
| chr4 | 158825915 | 158835476 |
| chr4 | 158851320 | 158861776 |
| chr4 | 158861341 | 158870469 |
| chr4 | 159304341 | 159314768 |
| chr4 | 159304341 | 159323617 |
| chr4 | 16174203  | 16176228  |

|      |           |           |
|------|-----------|-----------|
| chr4 | 16174203  | 16213898  |
| chr4 | 163137198 | 163148434 |
| chr4 | 165085585 | 165100892 |
| chr4 | 165085585 | 165103096 |
| chr4 | 165100627 | 165103096 |
| chr4 | 165219933 | 165228913 |
| chr4 | 165219933 | 165238899 |
| chr4 | 165219933 | 165263359 |
| chr4 | 165219933 | 165299656 |
| chr4 | 165228806 | 165263359 |
| chr4 | 165238777 | 165263359 |
| chr4 | 165263196 | 165297725 |
| chr4 | 165263196 | 165299656 |
| chr4 | 165294358 | 165299656 |
| chr4 | 165305607 | 165310750 |
| chr4 | 1654977   | 1657468   |
| chr4 | 1654977   | 1668905   |
| chr4 | 168220654 | 168237795 |
| chr4 | 168415407 | 168416797 |
| chr4 | 168471746 | 168472809 |
| chr4 | 168890921 | 168894677 |
| chr4 | 168890921 | 168916027 |
| chr4 | 168894578 | 168898714 |
| chr4 | 168898492 | 168903906 |
| chr4 | 169002070 | 169007756 |
| chr4 | 169006754 | 169007756 |
| chr4 | 169106846 | 169122266 |
| chr4 | 169106846 | 169136620 |
| chr4 | 169116268 | 169136620 |
| chr4 | 169130045 | 169136620 |
| chr4 | 169155479 | 169156679 |
| chr4 | 169424552 | 169433665 |
| chr4 | 169424552 | 169438259 |
| chr4 | 169463242 | 169508331 |
| chr4 | 169463242 | 169556095 |
| chr4 | 169477123 | 169477497 |
| chr4 | 169477123 | 169479534 |
| chr4 | 1694773   | 1700070   |
| chr4 | 1694773   | 1703700   |
| chr4 | 169507036 | 169508331 |
| chr4 | 169537808 | 169556095 |
| chr4 | 169555719 | 169556095 |
| chr4 | 169576927 | 169599197 |
| chr4 | 169576927 | 169602678 |
| chr4 | 169580841 | 169590809 |



|      |           |           |
|------|-----------|-----------|
| chr4 | 169580841 | 169599197 |
| chr4 | 169580841 | 169602678 |
| chr4 | 169585348 | 169590809 |
| chr4 | 169585348 | 169599197 |
| chr4 | 169590725 | 169602678 |
| chr4 | 169602007 | 169602678 |
| chr4 | 1696201   | 1700070   |
| chr4 | 169687657 | 169690652 |
| chr4 | 169741956 | 169753835 |
| chr4 | 170088395 | 170089736 |
| chr4 | 1723420   | 1728787   |
| chr4 | 1727707   | 1731301   |
| chr4 | 1730886   | 1731301   |
| chr4 | 1730886   | 1735834   |
| chr4 | 173292107 | 173304118 |
| chr4 | 174259698 | 174263100 |
| chr4 | 174297965 | 174316290 |
| chr4 | 174299071 | 174310056 |
| chr4 | 174308688 | 174310056 |
| chr4 | 17501718  | 17504475  |
| chr4 | 17501718  | 17509363  |
| chr4 | 176111574 | 176115979 |
| chr4 | 176111574 | 176120097 |
| chr4 | 176148132 | 176151967 |
| chr4 | 176149806 | 176151967 |
| chr4 | 176711498 | 176729746 |
| chr4 | 176727777 | 176729746 |
| chr4 | 177339782 | 177351549 |
| chr4 | 177339782 | 177353728 |
| chr4 | 177339782 | 177360677 |
| chr4 | 177351379 | 177353728 |
| chr4 | 177353307 | 177360677 |
| chr4 | 17812220  | 17815358  |
| chr4 | 17812916  | 17825561  |
| chr4 | 17814852  | 17815358  |
| chr4 | 17814852  | 17818088  |
| chr4 | 17814852  | 17825057  |
| chr4 | 17814852  | 17831116  |
| chr4 | 17822982  | 17831116  |
| chr4 | 17823671  | 17828388  |
| chr4 | 17909093  | 17963049  |
| chr4 | 17909093  | 17972885  |
| chr4 | 17961902  | 17963049  |
| chr4 | 17961902  | 17972885  |
| chr4 | 182894488 | 182915575 |

|      |           |           |
|------|-----------|-----------|
| chr4 | 182914922 | 182915575 |
| chr4 | 183193598 | 183209025 |
| chr4 | 183207952 | 183209025 |
| chr4 | 183240182 | 183249993 |
| chr4 | 183240182 | 183253999 |
| chr4 | 183249919 | 183253999 |
| chr4 | 183268970 | 183289635 |
| chr4 | 183285966 | 183289635 |
| chr4 | 1836428   | 1841797   |
| chr4 | 183663846 | 183668117 |
| chr4 | 183674712 | 183686748 |
| chr4 | 183683974 | 183685403 |
| chr4 | 183683974 | 183686748 |
| chr4 | 183683974 | 183693147 |
| chr4 | 184001324 | 184011423 |
| chr4 | 184418166 | 184419568 |
| chr4 | 184631764 | 184635418 |
| chr4 | 184631764 | 184638468 |
| chr4 | 184652022 | 184659437 |
| chr4 | 184659339 | 184666064 |
| chr4 | 184659339 | 184678394 |
| chr4 | 184659339 | 184685684 |
| chr4 | 184661773 | 184678394 |
| chr4 | 184661773 | 184691712 |
| chr4 | 184665916 | 184678394 |
| chr4 | 184672172 | 184682336 |
| chr4 | 184685408 | 184685684 |
| chr4 | 184710071 | 184725062 |
| chr4 | 184716396 | 184717196 |
| chr4 | 184780331 | 184803546 |
| chr4 | 185247293 | 185259064 |
| chr4 | 185247293 | 185264610 |
| chr4 | 185247293 | 185267155 |
| chr4 | 185247293 | 185288082 |
| chr4 | 185247293 | 185310816 |
| chr4 | 185247293 | 185323800 |
| chr4 | 185258847 | 185267155 |
| chr4 | 185264437 | 185267155 |
| chr4 | 185288011 | 185310816 |
| chr4 | 185310634 | 185346650 |
| chr4 | 185320732 | 185332759 |
| chr4 | 185339378 | 185342116 |
| chr4 | 185339378 | 185346650 |
| chr4 | 185357670 | 185362711 |
| chr4 | 185361923 | 185362711 |

|      |           |           |
|------|-----------|-----------|
| chr4 | 185523361 | 185525171 |
| chr4 | 186628153 | 186628763 |
| chr4 | 186633683 | 186639783 |
| chr4 | 186636584 | 186709845 |
| chr4 | 188099034 | 188105587 |
| chr4 | 188101055 | 188105587 |
| chr4 | 188104836 | 188105587 |
| chr4 | 189952161 | 189960839 |
| chr4 | 189955036 | 189960839 |
| chr4 | 1900625   | 1904378   |
| chr4 | 1900625   | 1918623   |
| chr4 | 1900625   | 1930770   |
| chr4 | 1900625   | 1935262   |
| chr4 | 1900625   | 1939778   |
| chr4 | 1900625   | 1961151   |
| chr4 | 1904215   | 1918623   |
| chr4 | 1904215   | 1935262   |
| chr4 | 1916870   | 1918623   |
| chr4 | 1916870   | 1935262   |
| chr4 | 1918140   | 1930770   |
| chr4 | 1918140   | 1935262   |
| chr4 | 1957932   | 1961151   |
| chr4 | 20467751  | 20491899  |
| chr4 | 20467751  | 20519453  |
| chr4 | 20491760  | 20539584  |
| chr4 | 20510494  | 20524177  |
| chr4 | 20528948  | 20533715  |
| chr4 | 20528948  | 20539584  |
| chr4 | 20549056  | 20598395  |
| chr4 | 20704465  | 20704814  |
| chr4 | 2156787   | 2179465   |
| chr4 | 2170678   | 2179465   |
| chr4 | 22389087  | 22392690  |
| chr4 | 22389087  | 22402799  |
| chr4 | 22389087  | 22413814  |
| chr4 | 22401430  | 22402799  |
| chr4 | 22413181  | 22421089  |
| chr4 | 22435310  | 22473843  |
| chr4 | 24537050  | 24556410  |
| chr4 | 24541872  | 24556410  |
| chr4 | 24554724  | 24556410  |
| chr4 | 24554724  | 24570847  |
| chr4 | 24570653  | 24576678  |
| chr4 | 2470986   | 2500738   |
| chr4 | 2490336   | 2497121   |

|      |          |          |
|------|----------|----------|
| chr4 | 2490336  | 2500738  |
| chr4 | 25127263 | 25159107 |
| chr4 | 25144773 | 25159107 |
| chr4 | 25151959 | 25159107 |
| chr4 | 25154997 | 25159107 |
| chr4 | 25252320 | 25263849 |
| chr4 | 25255064 | 25260591 |
| chr4 | 25255064 | 25263849 |
| chr4 | 25260523 | 25269203 |
| chr4 | 25314045 | 25351689 |
| chr4 | 25333182 | 25333988 |
| chr4 | 25345547 | 25351689 |
| chr4 | 25383260 | 25391015 |
| chr4 | 25765325 | 25767830 |
| chr4 | 25802282 | 25835323 |
| chr4 | 25818137 | 25847864 |
| chr4 | 25832994 | 25835323 |
| chr4 | 2630934  | 2639859  |
| chr4 | 2630934  | 2646832  |
| chr4 | 26362445 | 26415640 |
| chr4 | 26386352 | 26424743 |
| chr4 | 26406174 | 26415640 |
| chr4 | 2646684  | 2659670  |
| chr4 | 2655057  | 2689704  |
| chr4 | 2657802  | 2660054  |
| chr4 | 2657802  | 2663288  |
| chr4 | 2657802  | 2672372  |
| chr4 | 2657802  | 2690970  |
| chr4 | 26613168 | 26640187 |
| chr4 | 26613168 | 26666405 |
| chr4 | 26620612 | 26640187 |
| chr4 | 26620612 | 26666405 |
| chr4 | 26620612 | 26673888 |
| chr4 | 26620612 | 26748526 |
| chr4 | 2662837  | 2663288  |
| chr4 | 2662837  | 2672372  |
| chr4 | 26659596 | 26673888 |
| chr4 | 26666332 | 26688407 |
| chr4 | 26666332 | 26748526 |
| chr4 | 26683674 | 26720125 |
| chr4 | 26717932 | 26748526 |
| chr4 | 26717932 | 26753890 |
| chr4 | 26919503 | 26957726 |
| chr4 | 2867971  | 2884666  |
| chr4 | 2875895  | 2884666  |

|      |          |          |
|------|----------|----------|
| chr4 | 2894012  | 2894731  |
| chr4 | 2904763  | 2908604  |
| chr4 | 2949933  | 2951245  |
| chr4 | 2949933  | 2953645  |
| chr4 | 2949933  | 2954563  |
| chr4 | 2952274  | 2953645  |
| chr4 | 2952274  | 2956811  |
| chr4 | 2953510  | 2956811  |
| chr4 | 2953510  | 2957740  |
| chr4 | 2954423  | 2956811  |
| chr4 | 2956669  | 2957740  |
| chr4 | 3007735  | 3013828  |
| chr4 | 3019640  | 3022451  |
| chr4 | 3086938  | 3099394  |
| chr4 | 3086938  | 3107423  |
| chr4 | 3086938  | 3116263  |
| chr4 | 3099273  | 3107423  |
| chr4 | 3103823  | 3107423  |
| chr4 | 3103823  | 3116263  |
| chr4 | 3125548  | 3131775  |
| chr4 | 3127263  | 3131775  |
| chr4 | 3127263  | 3140656  |
| chr4 | 3130304  | 3131775  |
| chr4 | 3140509  | 3148207  |
| chr4 | 3142765  | 3148207  |
| chr4 | 3154292  | 3160392  |
| chr4 | 3186596  | 3189093  |
| chr4 | 3186596  | 3199939  |
| chr4 | 3235283  | 3238609  |
| chr4 | 3316069  | 3343053  |
| chr4 | 3422904  | 3428169  |
| chr4 | 343781   | 344430   |
| chr4 | 36107564 | 36121326 |
| chr4 | 36107564 | 36124967 |
| chr4 | 36107564 | 36151044 |
| chr4 | 36124861 | 36151044 |
| chr4 | 36177826 | 36193647 |
| chr4 | 36187450 | 36229645 |
| chr4 | 36210389 | 36214480 |
| chr4 | 36210389 | 36229645 |
| chr4 | 37631384 | 37635123 |
| chr4 | 37631384 | 37638504 |
| chr4 | 37631384 | 37649500 |
| chr4 | 37834617 | 37840259 |
| chr4 | 38014508 | 38027879 |

|      |          |          |
|------|----------|----------|
| chr4 | 38014508 | 38035698 |
| chr4 | 38020590 | 38027879 |
| chr4 | 38027787 | 38035698 |
| chr4 | 38027787 | 38052060 |
| chr4 | 38035587 | 38045903 |
| chr4 | 38035587 | 38049898 |
| chr4 | 38035587 | 38054338 |
| chr4 | 38054198 | 38096090 |
| chr4 | 38054198 | 38103157 |
| chr4 | 38089931 | 38103157 |
| chr4 | 38089931 | 38118192 |
| chr4 | 38095928 | 38103157 |
| chr4 | 38905521 | 38905861 |
| chr4 | 38931450 | 38935790 |
| chr4 | 38932234 | 38935790 |
| chr4 | 38986335 | 38993998 |
| chr4 | 39075964 | 39081239 |
| chr4 | 39075964 | 39086727 |
| chr4 | 39075964 | 39096878 |
| chr4 | 39081102 | 39086727 |
| chr4 | 39081102 | 39115330 |
| chr4 | 39081962 | 39086727 |
| chr4 | 39113019 | 39115330 |
| chr4 | 39215840 | 39218105 |
| chr4 | 39224883 | 39232272 |
| chr4 | 39224883 | 39240334 |
| chr4 | 39228209 | 39228690 |
| chr4 | 39253905 | 39257554 |
| chr4 | 39267994 | 39270100 |
| chr4 | 39300020 | 39303151 |
| chr4 | 39302277 | 39303151 |
| chr4 | 39302277 | 39304928 |
| chr4 | 39304813 | 39309032 |
| chr4 | 39320382 | 39323417 |
| chr4 | 39326562 | 39327756 |
| chr4 | 39467517 | 39473211 |
| chr4 | 39508565 | 39514184 |
| chr4 | 39737419 | 39755739 |
| chr4 | 39737419 | 39774933 |
| chr4 | 39737419 | 39777810 |
| chr4 | 39745751 | 39774933 |
| chr4 | 39745751 | 39777810 |
| chr4 | 39755656 | 39777810 |
| chr4 | 39774833 | 39777810 |
| chr4 | 39837855 | 39842056 |

|      |          |          |
|------|----------|----------|
| chr4 | 39837855 | 39848970 |
| chr4 | 39841947 | 39844801 |
| chr4 | 39841947 | 39845880 |
| chr4 | 39841947 | 39849652 |
| chr4 | 39845817 | 39849652 |
| chr4 | 39848850 | 39849652 |
| chr4 | 39862218 | 39904191 |
| chr4 | 39866860 | 39869462 |
| chr4 | 39866860 | 39873144 |
| chr4 | 39869393 | 39890364 |
| chr4 | 39872985 | 39877153 |
| chr4 | 39872985 | 39890364 |
| chr4 | 39872985 | 39925933 |
| chr4 | 39874288 | 39877153 |
| chr4 | 39874288 | 39890364 |
| chr4 | 39874288 | 39902460 |
| chr4 | 39879727 | 39890364 |
| chr4 | 39890248 | 39902460 |
| chr4 | 39890248 | 39925933 |
| chr4 | 39898388 | 39902460 |
| chr4 | 39898388 | 39920399 |
| chr4 | 39898388 | 39925933 |
| chr4 | 39902346 | 39917188 |
| chr4 | 39902346 | 39922748 |
| chr4 | 39902346 | 39925933 |
| chr4 | 39904039 | 39922748 |
| chr4 | 39904039 | 39925933 |
| chr4 | 39904039 | 39976617 |
| chr4 | 39910243 | 39920399 |
| chr4 | 39910243 | 39925933 |
| chr4 | 39913610 | 39920399 |
| chr4 | 39913610 | 39922748 |
| chr4 | 39913610 | 39925933 |
| chr4 | 39913610 | 39928164 |
| chr4 | 39917047 | 39925933 |
| chr4 | 39922621 | 39928164 |
| chr4 | 39922621 | 39976617 |
| chr4 | 40106899 | 40118024 |
| chr4 | 40126133 | 40137082 |
| chr4 | 40821870 | 40945073 |
| chr4 | 40890363 | 40893411 |
| chr4 | 40890363 | 40935139 |
| chr4 | 40890363 | 40945070 |
| chr4 | 40890363 | 40945073 |
| chr4 | 40890363 | 41143142 |

|      |          |          |
|------|----------|----------|
| chr4 | 40934455 | 40945070 |
| chr4 | 40934455 | 40945073 |
| chr4 | 41013582 | 41033304 |
| chr4 | 41013582 | 41100750 |
| chr4 | 41100638 | 41143142 |
| chr4 | 41598919 | 41650608 |
| chr4 | 41603874 | 41619440 |
| chr4 | 41605893 | 41619440 |
| chr4 | 41605893 | 41650608 |
| chr4 | 41613465 | 41619440 |
| chr4 | 41661419 | 41671594 |
| chr4 | 41661419 | 41692384 |
| chr4 | 41666560 | 41676462 |
| chr4 | 41666560 | 41692384 |
| chr4 | 42001615 | 42022930 |
| chr4 | 42001615 | 42023384 |
| chr4 | 42001615 | 42039053 |
| chr4 | 42001615 | 42078325 |
| chr4 | 42018110 | 42023384 |
| chr4 | 42018110 | 42035333 |
| chr4 | 42018110 | 42039053 |
| chr4 | 42018110 | 42049479 |
| chr4 | 42020415 | 42023384 |
| chr4 | 42020415 | 42039053 |
| chr4 | 42022837 | 42039053 |
| chr4 | 42062985 | 42078325 |
| chr4 | 4237826  | 4246343  |
| chr4 | 42522159 | 42556040 |
| chr4 | 42616032 | 42627109 |
| chr4 | 4279446  | 4281897  |
| chr4 | 4299926  | 4315970  |
| chr4 | 4306137  | 4315970  |
| chr4 | 4313040  | 4315970  |
| chr4 | 4315635  | 4315970  |
| chr4 | 4434769  | 4471706  |
| chr4 | 4457190  | 4471706  |
| chr4 | 44680440 | 44686023 |
| chr4 | 44710952 | 44722242 |
| chr4 | 44717112 | 44722242 |
| chr4 | 4648976  | 4649542  |
| chr4 | 47535508 | 47536938 |
| chr4 | 47535508 | 47546862 |
| chr4 | 47744401 | 47786925 |
| chr4 | 47744401 | 47807047 |
| chr4 | 47855058 | 47875293 |



|      |          |          |
|------|----------|----------|
| chr4 | 47855058 | 47910994 |
| chr4 | 47862845 | 47885999 |
| chr4 | 47875126 | 47879117 |
| chr4 | 47875126 | 47885999 |
| chr4 | 47875126 | 47894302 |
| chr4 | 47875126 | 47914205 |
| chr4 | 47879095 | 47898857 |
| chr4 | 47884345 | 47890703 |
| chr4 | 47884345 | 47894302 |
| chr4 | 47884345 | 47896647 |
| chr4 | 47884345 | 47914205 |
| chr4 | 47894179 | 47905346 |
| chr4 | 48171367 | 48176186 |
| chr4 | 48369848 | 48379848 |
| chr4 | 48369848 | 48383784 |
| chr4 | 48377895 | 48383784 |
| chr4 | 48383646 | 48420443 |
| chr4 | 48505546 | 48515275 |
| chr4 | 48556977 | 48562988 |
| chr4 | 48562888 | 48567420 |
| chr4 | 48590658 | 48605833 |
| chr4 | 48590658 | 48609067 |
| chr4 | 48593929 | 48609067 |
| chr4 | 48595896 | 48609823 |
| chr4 | 48602019 | 48609823 |
| chr4 | 48606437 | 48609823 |
| chr4 | 48619273 | 48634490 |
| chr4 | 48684672 | 48710698 |
| chr4 | 48832619 | 48848446 |
| chr4 | 48833400 | 48857365 |
| chr4 | 48851805 | 48857365 |
| chr4 | 505717   | 507593   |
| chr4 | 505717   | 508970   |
| chr4 | 51848204 | 51899378 |
| chr4 | 51863436 | 51877854 |
| chr4 | 51863436 | 51886638 |
| chr4 | 51863436 | 51891851 |
| chr4 | 51874270 | 51877854 |
| chr4 | 51874270 | 51891851 |
| chr4 | 51874270 | 51899378 |
| chr4 | 51886567 | 51913392 |
| chr4 | 52626017 | 52631144 |
| chr4 | 52627949 | 52631144 |
| chr4 | 52907456 | 52920870 |
| chr4 | 53379072 | 53391498 |

|      |          |          |
|------|----------|----------|
| chr4 | 53379072 | 53399839 |
| chr4 | 53379072 | 53414722 |
| chr4 | 53379224 | 53391139 |
| chr4 | 53382277 | 53383876 |
| chr4 | 53383772 | 53391139 |
| chr4 | 53383772 | 53391498 |
| chr4 | 53383772 | 53399839 |
| chr4 | 53383772 | 53428183 |
| chr4 | 53383772 | 53444103 |
| chr4 | 53383772 | 53453133 |
| chr4 | 53399729 | 53428183 |
| chr4 | 53399729 | 53444103 |
| chr4 | 53414614 | 53428183 |
| chr4 | 53414614 | 53444103 |
| chr4 | 53414614 | 53453133 |
| chr4 | 53425871 | 53428183 |
| chr4 | 53425871 | 53444103 |
| chr4 | 53425871 | 53453133 |
| chr4 | 55403235 | 55411839 |
| chr4 | 55411613 | 55417985 |
| chr4 | 55417071 | 55417985 |
| chr4 | 55448778 | 55450232 |
| chr4 | 55453053 | 55456300 |
| chr4 | 55458891 | 55459261 |
| chr4 | 55470716 | 55482828 |
| chr4 | 55470716 | 55489465 |
| chr4 | 55470716 | 55510065 |
| chr4 | 55475962 | 55482828 |
| chr4 | 55475962 | 55489465 |
| chr4 | 55475962 | 55510065 |
| chr4 | 55478814 | 55510065 |
| chr4 | 55486392 | 55510065 |
| chr4 | 55877916 | 55890386 |
| chr4 | 55888887 | 55892711 |
| chr4 | 55891314 | 55893780 |
| chr4 | 55952085 | 55954383 |
| chr4 | 55959681 | 55965859 |
| chr4 | 55959681 | 55985358 |
| chr4 | 55964273 | 55971408 |
| chr4 | 55999490 | 56024614 |
| chr4 | 56011411 | 56011985 |
| chr4 | 56017647 | 56019555 |
| chr4 | 56017647 | 56024614 |
| chr4 | 56298213 | 56316689 |
| chr4 | 56353403 | 56355423 |

|      |          |          |
|------|----------|----------|
| chr4 | 56378147 | 56384341 |
| chr4 | 56399178 | 56406701 |
| chr4 | 56403039 | 56406701 |
| chr4 | 56451871 | 56453761 |
| chr4 | 56474053 | 56474391 |
| chr4 | 56478378 | 56484864 |
| chr4 | 5663106  | 5665649  |
| chr4 | 56910629 | 56919870 |
| chr4 | 56973147 | 56974022 |
| chr4 | 56990747 | 56999781 |
| chr4 | 57010360 | 57030399 |
| chr4 | 57015501 | 57025537 |
| chr4 | 57023661 | 57030399 |
| chr4 | 57024885 | 57025537 |
| chr4 | 5729306  | 5741814  |
| chr4 | 5729306  | 5756362  |
| chr4 | 5835914  | 5843161  |
| chr4 | 5843092  | 5851469  |
| chr4 | 5861025  | 5866756  |
| chr4 | 61934839 | 61998265 |
| chr4 | 61934839 | 62044549 |
| chr4 | 61946913 | 61998265 |
| chr4 | 6347845  | 6381094  |
| chr4 | 6609106  | 6611278  |
| chr4 | 6610879  | 6611278  |
| chr4 | 67518155 | 67519502 |
| chr4 | 67530814 | 67544195 |
| chr4 | 67663138 | 67665292 |
| chr4 | 6804522  | 6824684  |
| chr4 | 6804522  | 6842204  |
| chr4 | 6824184  | 6842204  |
| chr4 | 6842066  | 6858506  |
| chr4 | 6923372  | 6967424  |
| chr4 | 6994183  | 6999202  |
| chr4 | 6994183  | 7001251  |
| chr4 | 6994183  | 7014557  |
| chr4 | 6996324  | 7004924  |
| chr4 | 6999084  | 7004924  |
| chr4 | 6999084  | 7014557  |
| chr4 | 7004843  | 7014557  |
| chr4 | 7004843  | 7025262  |
| chr4 | 7006631  | 7014557  |
| chr4 | 70762518 | 70764576 |
| chr4 | 70762518 | 70768661 |
| chr4 | 70762518 | 70778438 |

|      |          |          |
|------|----------|----------|
| chr4 | 70762518 | 70784879 |
| chr4 | 70762518 | 70789592 |
| chr4 | 70764474 | 70778438 |
| chr4 | 70783090 | 70784879 |
| chr4 | 70824293 | 70826245 |
| chr4 | 70824293 | 70828036 |
| chr4 | 70827851 | 70833273 |
| chr4 | 70831538 | 70832450 |
| chr4 | 70831538 | 70833273 |
| chr4 | 70832306 | 70836314 |
| chr4 | 70950699 | 70959040 |
| chr4 | 70950699 | 70975286 |
| chr4 | 70958873 | 70970024 |
| chr4 | 70958873 | 70979291 |
| chr4 | 71236575 | 71255399 |
| chr4 | 71339369 | 71357187 |
| chr4 | 71532061 | 71534388 |
| chr4 | 73064777 | 73065413 |
| chr4 | 73076939 | 73092300 |
| chr4 | 73078641 | 73092300 |
| chr4 | 73090666 | 73102547 |
| chr4 | 73097116 | 73102547 |
| chr4 | 73102375 | 73113908 |
| chr4 | 73118687 | 73125312 |
| chr4 | 73120161 | 73125312 |
| chr4 | 73120880 | 73151524 |
| chr4 | 73124912 | 73125312 |
| chr4 | 73141740 | 73177533 |
| chr4 | 73151429 | 73177533 |
| chr4 | 734930   | 744688   |
| chr4 | 74174505 | 74175403 |
| chr4 | 74174505 | 74201370 |
| chr4 | 74174505 | 74225394 |
| chr4 | 74174505 | 74281550 |
| chr4 | 74199793 | 74201370 |
| chr4 | 74199793 | 74225394 |
| chr4 | 75515432 | 75516979 |
| chr4 | 75646337 | 75648741 |
| chr4 | 75646337 | 75657730 |
| chr4 | 75648638 | 75655870 |
| chr4 | 75655065 | 75662049 |
| chr4 | 75656923 | 75662049 |
| chr4 | 75658842 | 75662049 |
| chr4 | 75757496 | 75782858 |
| chr4 | 75770438 | 75771137 |

|      |          |          |
|------|----------|----------|
| chr4 | 75790149 | 75790797 |
| chr4 | 75804133 | 75805303 |
| chr4 | 75806485 | 75812375 |
| chr4 | 75925734 | 75936235 |
| chr4 | 75957846 | 75961308 |
| chr4 | 75960065 | 75965822 |
| chr4 | 75964134 | 75982037 |
| chr4 | 75967276 | 75971458 |
| chr4 | 75967276 | 75974133 |
| chr4 | 75969295 | 75971458 |
| chr4 | 75981371 | 75982037 |
| chr4 | 76124648 | 76144473 |
| chr4 | 76130655 | 76136412 |
| chr4 | 76130655 | 76144473 |
| chr4 | 76131229 | 76132719 |
| chr4 | 76134174 | 76144473 |
| chr4 | 76144148 | 76144473 |
| chr4 | 76730803 | 76741926 |
| chr4 | 76995780 | 76996539 |
| chr4 | 76995780 | 77020670 |
| chr4 | 76995780 | 77030970 |
| chr4 | 76996424 | 77030970 |
| chr4 | 77005600 | 77020670 |
| chr4 | 77019164 | 77020670 |
| chr4 | 77055961 | 77056323 |
| chr4 | 77055961 | 77066405 |
| chr4 | 77056248 | 77066405 |
| chr4 | 77058506 | 77066405 |
| chr4 | 77158532 | 77164479 |
| chr4 | 7772819  | 7778876  |
| chr4 | 77742140 | 77776392 |
| chr4 | 77756861 | 77776392 |
| chr4 | 77773080 | 77776392 |
| chr4 | 7786193  | 7800653  |
| chr4 | 7786193  | 7843350  |
| chr4 | 77883241 | 77909372 |
| chr4 | 7793680  | 7800653  |
| chr4 | 7793680  | 7809763  |
| chr4 | 7800441  | 7809763  |
| chr4 | 7809613  | 7819171  |
| chr4 | 7809613  | 7843350  |
| chr4 | 7816017  | 7838703  |
| chr4 | 7838523  | 7843350  |
| chr4 | 7838523  | 7855574  |
| chr4 | 7855465  | 7872080  |

|      |          |          |
|------|----------|----------|
| chr4 | 7868621  | 7872080  |
| chr4 | 78826036 | 78833687 |
| chr4 | 78826036 | 78851056 |
| chr4 | 78826036 | 78878891 |
| chr4 | 78842384 | 78851056 |
| chr4 | 78870782 | 78878891 |
| chr4 | 78871849 | 78878891 |
| chr4 | 78878733 | 78887284 |
| chr4 | 79977620 | 79984863 |
| chr4 | 80008520 | 80036032 |
| chr4 | 80008520 | 80069507 |
| chr4 | 82355303 | 82356895 |
| chr4 | 82355303 | 82359639 |
| chr4 | 82356536 | 82356895 |
| chr4 | 82358658 | 82359639 |
| chr4 | 82358658 | 82371584 |
| chr4 | 82426036 | 82428446 |
| chr4 | 82428017 | 82428446 |
| chr4 | 82447919 | 82451245 |
| chr4 | 82447919 | 82454854 |
| chr4 | 82454721 | 82457038 |
| chr4 | 82680706 | 82705413 |
| chr4 | 82844385 | 82848977 |
| chr4 | 82848803 | 82861708 |
| chr4 | 82848803 | 82881940 |
| chr4 | 82851430 | 82867316 |
| chr4 | 82854902 | 82861708 |
| chr4 | 82866807 | 82867316 |
| chr4 | 82870324 | 82881940 |
| chr4 | 82871943 | 82875822 |
| chr4 | 82874610 | 82875822 |
| chr4 | 82874610 | 82881940 |
| chr4 | 82878729 | 82880922 |
| chr4 | 82878729 | 82881937 |
| chr4 | 82878729 | 82881940 |
| chr4 | 82930942 | 82979006 |
| chr4 | 82946257 | 82970469 |
| chr4 | 82946257 | 82979006 |
| chr4 | 82970326 | 82979006 |
| chr4 | 82978882 | 82984876 |
| chr4 | 83049165 | 83057408 |
| chr4 | 83056925 | 83063246 |
| chr4 | 83267585 | 83279114 |
| chr4 | 83272086 | 83279114 |
| chr4 | 83302149 | 83313287 |

|      |          |          |
|------|----------|----------|
| chr4 | 83416730 | 83418206 |
| chr4 | 83427562 | 83432267 |
| chr4 | 83439862 | 83446086 |
| chr4 | 83463493 | 83467538 |
| chr4 | 83463493 | 83469151 |
| chr4 | 83469031 | 83472288 |
| chr4 | 83470202 | 83482244 |
| chr4 | 83581561 | 83590292 |
| chr4 | 8451959  | 8452989  |
| chr4 | 84678167 | 84679242 |
| chr4 | 84683942 | 84696823 |
| chr4 | 84695969 | 84705511 |
| chr4 | 84695969 | 84709347 |
| chr4 | 84702352 | 84709347 |
| chr4 | 84702352 | 84715383 |
| chr4 | 84702352 | 84717016 |
| chr4 | 84702352 | 84721572 |
| chr4 | 84704337 | 84709347 |
| chr4 | 84708908 | 84717016 |
| chr4 | 84718421 | 84740416 |
| chr4 | 84739009 | 84740416 |
| chr4 | 84766251 | 84774981 |
| chr4 | 84774819 | 84794979 |
| chr4 | 84780107 | 84783074 |
| chr4 | 84796520 | 84801864 |
| chr4 | 84829003 | 84841263 |
| chr4 | 84829003 | 84897010 |
| chr4 | 84849901 | 84860622 |
| chr4 | 84860411 | 84897010 |
| chr4 | 84860411 | 84932363 |
| chr4 | 84896910 | 84932363 |
| chr4 | 865121   | 884086   |
| chr4 | 86672364 | 86693674 |
| chr4 | 86672364 | 86701801 |
| chr4 | 86686709 | 86689190 |
| chr4 | 86686709 | 86693674 |
| chr4 | 86686709 | 86701801 |
| chr4 | 86693586 | 86701801 |
| chr4 | 86693586 | 86717117 |
| chr4 | 86764592 | 86767976 |
| chr4 | 86772777 | 86775652 |
| chr4 | 86780401 | 86785936 |
| chr4 | 87046165 | 87047594 |
| chr4 | 870710   | 883463   |
| chr4 | 870710   | 884086   |

|      |          |          |
|------|----------|----------|
| chr4 | 87084119 | 87091829 |
| chr4 | 87084119 | 87094969 |
| chr4 | 87170078 | 87176868 |
| chr4 | 87170078 | 87195690 |
| chr4 | 87183202 | 87195690 |
| chr4 | 87434980 | 87454455 |
| chr4 | 87438276 | 87454455 |
| chr4 | 87441828 | 87454455 |
| chr4 | 88019457 | 88043457 |
| chr4 | 88036219 | 88065879 |
| chr4 | 88038250 | 88052158 |
| chr4 | 88038250 | 88056267 |
| chr4 | 88051990 | 88065879 |
| chr4 | 88051990 | 88068061 |
| chr4 | 88061905 | 88065879 |
| chr4 | 88131060 | 88140014 |
| chr4 | 88383220 | 88398209 |
| chr4 | 88390651 | 88393582 |
| chr4 | 88423859 | 88431305 |
| chr4 | 88472408 | 88476030 |
| chr4 | 88475840 | 88479507 |
| chr4 | 88475840 | 88494331 |
| chr4 | 88649839 | 88654133 |
| chr4 | 88767552 | 88851183 |
| chr4 | 88781164 | 88805052 |
| chr4 | 888846   | 904779   |
| chr4 | 88906378 | 88938241 |
| chr4 | 88906378 | 89029649 |
| chr4 | 890531   | 904779   |
| chr4 | 893376   | 904779   |
| chr4 | 904636   | 913668   |
| chr4 | 911672   | 913668   |
| chr4 | 94226118 | 94237018 |
| chr4 | 94226118 | 94241006 |
| chr4 | 94226118 | 94253007 |
| chr4 | 94236951 | 94249755 |
| chr4 | 94276338 | 94283303 |
| chr4 | 94523723 | 94576034 |
| chr4 | 94573350 | 94586444 |
| chr4 | 94618003 | 94640450 |
| chr4 | 94640275 | 94657547 |
| chr4 | 947708   | 953354   |
| chr4 | 97981158 | 98134459 |
| chr4 | 98105952 | 98109305 |
| chr4 | 98105952 | 98134459 |



|      |           |           |
|------|-----------|-----------|
| chr4 | 98109192  | 98134459  |
| chr4 | 98128427  | 98134459  |
| chr4 | 98352475  | 98379163  |
| chr4 | 98404476  | 98421394  |
| chr4 | 98416744  | 98418791  |
| chr4 | 98416744  | 98420144  |
| chr4 | 98416744  | 98437068  |
| chr4 | 98887078  | 98891332  |
| chr4 | 99028866  | 99048876  |
| chr4 | 99041042  | 99045310  |
| chr5 | 10258110  | 10263314  |
| chr5 | 102865822 | 102867393 |
| chr5 | 102913933 | 102961229 |
| chr5 | 102946836 | 102974436 |
| chr5 | 102948377 | 102950820 |
| chr5 | 102990271 | 103009866 |
| chr5 | 103003032 | 103009866 |
| chr5 | 103096540 | 103097781 |
| chr5 | 103136731 | 103146681 |
| chr5 | 103136731 | 103158573 |
| chr5 | 103138383 | 103149313 |
| chr5 | 1032151   | 1036384   |
| chr5 | 10377797  | 10394785  |
| chr5 | 10381799  | 10391731  |
| chr5 | 10381799  | 10394785  |
| chr5 | 10386993  | 10391731  |
| chr5 | 10386993  | 10394785  |
| chr5 | 10402383  | 10407202  |
| chr5 | 10405557  | 10417404  |
| chr5 | 10414432  | 10417404  |
| chr5 | 10415487  | 10417404  |
| chr5 | 1057470   | 1065478   |
| chr5 | 1063843   | 1065478   |
| chr5 | 108020924 | 108186247 |
| chr5 | 108020924 | 108224228 |
| chr5 | 108020924 | 108348530 |
| chr5 | 108186116 | 108348530 |
| chr5 | 108186116 | 108367953 |
| chr5 | 108224120 | 108348530 |
| chr5 | 108348398 | 108367953 |
| chr5 | 108768092 | 108798389 |
| chr5 | 108768092 | 108835807 |
| chr5 | 108768092 | 108959347 |
| chr5 | 108782662 | 108798389 |
| chr5 | 108798123 | 108835807 |

|      |           |           |
|------|-----------|-----------|
| chr5 | 108798123 | 108883518 |
| chr5 | 108798123 | 108946222 |
| chr5 | 108798123 | 109100519 |
| chr5 | 108832769 | 108835807 |
| chr5 | 108867766 | 108872212 |
| chr5 | 108867766 | 108883518 |
| chr5 | 108867766 | 108897848 |
| chr5 | 108883395 | 108897848 |
| chr5 | 108883395 | 108946222 |
| chr5 | 108883395 | 108959347 |
| chr5 | 108883395 | 109100519 |
| chr5 | 108897658 | 108959347 |
| chr5 | 108897658 | 109047198 |
| chr5 | 108946129 | 108959347 |
| chr5 | 108946129 | 109100519 |
| chr5 | 108954728 | 108959347 |
| chr5 | 108959224 | 109100519 |
| chr5 | 109037421 | 109047198 |
| chr5 | 109037421 | 109100519 |
| chr5 | 109344189 | 109356026 |
| chr5 | 109362839 | 109383520 |
| chr5 | 109713519 | 109716264 |
| chr5 | 109713519 | 109729513 |
| chr5 | 109713519 | 109755456 |
| chr5 | 109713519 | 109774965 |
| chr5 | 109713519 | 109789527 |
| chr5 | 109729341 | 109755456 |
| chr5 | 109729341 | 109774965 |
| chr5 | 109755328 | 109774965 |
| chr5 | 109767534 | 109774965 |
| chr5 | 109767534 | 109789527 |
| chr5 | 109781395 | 109789527 |
| chr5 | 109781395 | 109823837 |
| chr5 | 109784743 | 109823837 |
| chr5 | 109817272 | 109823837 |
| chr5 | 109817272 | 109847790 |
| chr5 | 109842327 | 109847790 |
| chr5 | 109842327 | 109855334 |
| chr5 | 110618428 | 110627880 |
| chr5 | 110742046 | 110748263 |
| chr5 | 110742046 | 110756759 |
| chr5 | 111097078 | 111102399 |
| chr5 | 111098721 | 111111278 |
| chr5 | 111110188 | 111113153 |
| chr5 | 111344023 | 111394782 |

|      |           |           |
|------|-----------|-----------|
| chr5 | 111374849 | 111394782 |
| chr5 | 112194567 | 112205504 |
| chr5 | 112234633 | 112240810 |
| chr5 | 112234633 | 112266330 |
| chr5 | 112259228 | 112266330 |
| chr5 | 112259228 | 112280323 |
| chr5 | 112259228 | 112307490 |
| chr5 | 112259890 | 112266330 |
| chr5 | 112262493 | 112280323 |
| chr5 | 112264895 | 112280323 |
| chr5 | 112275325 | 112307490 |
| chr5 | 112754872 | 112767390 |
| chr5 | 112754872 | 112775737 |
| chr5 | 112766325 | 112767390 |
| chr5 | 112766325 | 112780903 |
| chr5 | 112766325 | 112792529 |
| chr5 | 112766325 | 112801383 |
| chr5 | 112767188 | 112792529 |
| chr5 | 112775628 | 112780903 |
| chr5 | 112775628 | 112792529 |
| chr5 | 112780789 | 112801383 |
| chr5 | 112792445 | 112828006 |
| chr5 | 112792445 | 112828972 |
| chr5 | 112818965 | 112828972 |
| chr5 | 112821895 | 112828006 |
| chr5 | 112985834 | 112992248 |
| chr5 | 112985834 | 113001674 |
| chr5 | 112985834 | 113004077 |
| chr5 | 113001083 | 113001674 |
| chr5 | 113001083 | 113004077 |
| chr5 | 113001083 | 113008042 |
| chr5 | 113003941 | 113010807 |
| chr5 | 113063983 | 113085310 |
| chr5 | 113082859 | 113122826 |
| chr5 | 113524980 | 113526785 |
| chr5 | 113524980 | 113539181 |
| chr5 | 113524980 | 113549020 |
| chr5 | 113532878 | 113535798 |
| chr5 | 113532878 | 113542503 |
| chr5 | 113534304 | 113539181 |
| chr5 | 113534304 | 113542503 |
| chr5 | 113539073 | 113542503 |
| chr5 | 113553766 | 113563492 |
| chr5 | 113553766 | 113579695 |
| chr5 | 113556051 | 113563492 |

|      |           |           |
|------|-----------|-----------|
| chr5 | 113556051 | 113579695 |
| chr5 | 113579585 | 113592178 |
| chr5 | 115130591 | 115134147 |
| chr5 | 115130591 | 115137616 |
| chr5 | 115130591 | 115141374 |
| chr5 | 115137362 | 115147394 |
| chr5 | 115141278 | 115163752 |
| chr5 | 115216864 | 115238009 |
| chr5 | 115216864 | 115241606 |
| chr5 | 115221823 | 115241606 |
| chr5 | 115230975 | 115238009 |
| chr5 | 115230975 | 115253255 |
| chr5 | 115236389 | 115238009 |
| chr5 | 115236389 | 115253255 |
| chr5 | 115866669 | 115870128 |
| chr5 | 115866669 | 115895158 |
| chr5 | 116087496 | 116092700 |
| chr5 | 116087496 | 116134178 |
| chr5 | 116091078 | 116092700 |
| chr5 | 116091078 | 116134178 |
| chr5 | 118928536 | 118944649 |
| chr5 | 119097978 | 119102006 |
| chr5 | 119097978 | 119116336 |
| chr5 | 119097978 | 119119004 |
| chr5 | 119101934 | 119110283 |
| chr5 | 119101934 | 119114541 |
| chr5 | 119101934 | 119116336 |
| chr5 | 119105179 | 119114541 |
| chr5 | 119105179 | 119121139 |
| chr5 | 119110150 | 119114541 |
| chr5 | 119110150 | 119116336 |
| chr5 | 119110150 | 119119004 |
| chr5 | 119164506 | 119216987 |
| chr5 | 119175260 | 119178244 |
| chr5 | 119189707 | 119203436 |
| chr5 | 119220471 | 119239080 |
| chr5 | 119240418 | 119244576 |
| chr5 | 119473907 | 119496646 |
| chr5 | 119477416 | 119496646 |
| chr5 | 119506817 | 119515046 |
| chr5 | 119525215 | 119536550 |
| chr5 | 121974195 | 121975387 |
| chr5 | 121974195 | 121994670 |
| chr5 | 121994598 | 122022407 |
| chr5 | 122019259 | 122022407 |

|      |           |           |
|------|-----------|-----------|
| chr5 | 122795265 | 122803613 |
| chr5 | 122795265 | 122808355 |
| chr5 | 122795265 | 122819023 |
| chr5 | 122799691 | 122801935 |
| chr5 | 122799691 | 122808355 |
| chr5 | 122801868 | 122803613 |
| chr5 | 122801868 | 122819023 |
| chr5 | 122936733 | 122946159 |
| chr5 | 122936733 | 123002004 |
| chr5 | 123364495 | 123399284 |
| chr5 | 123399135 | 123423030 |
| chr5 | 123412398 | 123418515 |
| chr5 | 123416009 | 123418515 |
| chr5 | 123545416 | 123553147 |
| chr5 | 123545416 | 123557564 |
| chr5 | 123557494 | 123604830 |
| chr5 | 123575728 | 123588153 |
| chr5 | 123588067 | 123591414 |
| chr5 | 123590412 | 123591414 |
| chr5 | 1255286   | 1260600   |
| chr5 | 1258597   | 1268633   |
| chr5 | 126465425 | 126473368 |
| chr5 | 126469676 | 126477787 |
| chr5 | 126477691 | 126484524 |
| chr5 | 126546323 | 126552137 |
| chr5 | 126552020 | 126570859 |
| chr5 | 126554286 | 126556015 |
| chr5 | 126559239 | 126570859 |
| chr5 | 126561082 | 126577211 |
| chr5 | 126568258 | 126570859 |
| chr5 | 126568258 | 126577211 |
| chr5 | 126568258 | 126584012 |
| chr5 | 126570781 | 126577211 |
| chr5 | 126575419 | 126584012 |
| chr5 | 126575419 | 126593404 |
| chr5 | 126577078 | 126593404 |
| chr5 | 126582850 | 126584012 |
| chr5 | 126582850 | 126593404 |
| chr5 | 1266463   | 1282624   |
| chr5 | 126804775 | 126811898 |
| chr5 | 126804775 | 126826107 |
| chr5 | 126804775 | 126832801 |
| chr5 | 126811772 | 126826107 |
| chr5 | 126818921 | 126826107 |
| chr5 | 126818921 | 126832801 |

|      |           |           |
|------|-----------|-----------|
| chr5 | 126820909 | 126826107 |
| chr5 | 126878184 | 126918227 |
| chr5 | 126914929 | 126918227 |
| chr5 | 127523459 | 127524920 |
| chr5 | 127523459 | 127526778 |
| chr5 | 127526617 | 127539143 |
| chr5 | 127526617 | 127547921 |
| chr5 | 1278640   | 1282624   |
| chr5 | 128112813 | 128114681 |
| chr5 | 128112813 | 128141981 |
| chr5 | 128112813 | 128161800 |
| chr5 | 128114585 | 128131206 |
| chr5 | 128131066 | 128135808 |
| chr5 | 128131066 | 128141981 |
| chr5 | 128131066 | 128152805 |
| chr5 | 128131066 | 128161800 |
| chr5 | 128138596 | 128152805 |
| chr5 | 128141829 | 128167867 |
| chr5 | 128148753 | 128158164 |
| chr5 | 128174540 | 128182941 |
| chr5 | 128302972 | 128311953 |
| chr5 | 128446480 | 128530693 |
| chr5 | 128464723 | 128519368 |
| chr5 | 128464723 | 128527967 |
| chr5 | 128519272 | 128530693 |
| chr5 | 128985132 | 128990464 |
| chr5 | 129104955 | 129107062 |
| chr5 | 131180094 | 131187109 |
| chr5 | 131385542 | 131391108 |
| chr5 | 131430858 | 131433658 |
| chr5 | 131439580 | 131472744 |
| chr5 | 131453053 | 131456012 |
| chr5 | 131504625 | 131508207 |
| chr5 | 131504625 | 131548190 |
| chr5 | 131521389 | 131548190 |
| chr5 | 131521389 | 131562047 |
| chr5 | 131548046 | 131592466 |
| chr5 | 131548046 | 131604693 |
| chr5 | 131647089 | 131651999 |
| chr5 | 131670462 | 131679175 |
| chr5 | 131677702 | 131699002 |
| chr5 | 131677702 | 131709272 |
| chr5 | 131677702 | 131719060 |
| chr5 | 131677702 | 131744690 |
| chr5 | 131698916 | 131709272 |

|      |           |           |
|------|-----------|-----------|
| chr5 | 131698916 | 131719060 |
| chr5 | 131704064 | 131731038 |
| chr5 | 131710577 | 131719060 |
| chr5 | 132217196 | 132218644 |
| chr5 | 132559283 | 132580066 |
| chr5 | 132591223 | 132595810 |
| chr5 | 132699170 | 132711057 |
| chr5 | 132710958 | 132716984 |
| chr5 | 132715756 | 132734478 |
| chr5 | 132720608 | 132734478 |
| chr5 | 132726127 | 132734478 |
| chr5 | 132760801 | 132762645 |
| chr5 | 132883339 | 132885119 |
| chr5 | 132892163 | 132893118 |
| chr5 | 132892163 | 132897240 |
| chr5 | 132899103 | 132904404 |
| chr5 | 132927120 | 132934941 |
| chr5 | 132927120 | 132937193 |
| chr5 | 133006758 | 133022906 |
| chr5 | 133064979 | 133070496 |
| chr5 | 133064979 | 133074126 |
| chr5 | 133064979 | 133076898 |
| chr5 | 133067416 | 133076898 |
| chr5 | 133070373 | 133074126 |
| chr5 | 133073229 | 133074126 |
| chr5 | 133073229 | 133076898 |
| chr5 | 133086781 | 133089695 |
| chr5 | 133091192 | 133092789 |
| chr5 | 133091192 | 133099652 |
| chr5 | 133990854 | 133991154 |
| chr5 | 133990854 | 133993015 |
| chr5 | 133990854 | 133993018 |
| chr5 | 134158454 | 134174022 |
| chr5 | 134199085 | 134202021 |
| chr5 | 134199085 | 134206131 |
| chr5 | 134319357 | 134321903 |
| chr5 | 134350248 | 134360091 |
| chr5 | 134374382 | 134388413 |
| chr5 | 134535857 | 134538083 |
| chr5 | 134535857 | 134552209 |
| chr5 | 134535857 | 134564610 |
| chr5 | 134608371 | 134609674 |
| chr5 | 134666822 | 134671886 |
| chr5 | 134674614 | 134676125 |
| chr5 | 134674614 | 134682482 |

|      |           |           |
|------|-----------|-----------|
| chr5 | 134674614 | 134697246 |
| chr5 | 134679601 | 134682482 |
| chr5 | 134679601 | 134688299 |
| chr5 | 134682372 | 134688299 |
| chr5 | 134682372 | 134698057 |
| chr5 | 134692601 | 134693933 |
| chr5 | 134692601 | 134708888 |
| chr5 | 134697125 | 134698057 |
| chr5 | 134697125 | 134703932 |
| chr5 | 134697125 | 134705437 |
| chr5 | 134697898 | 134703932 |
| chr5 | 134697898 | 134705437 |
| chr5 | 134697898 | 134708888 |
| chr5 | 134703758 | 134718173 |
| chr5 | 134703758 | 134721090 |
| chr5 | 134708712 | 134718173 |
| chr5 | 134708712 | 134723670 |
| chr5 | 134741062 | 134744052 |
| chr5 | 134763903 | 134767060 |
| chr5 | 134763903 | 134770999 |
| chr5 | 134766916 | 134770999 |
| chr5 | 134777573 | 134783065 |
| chr5 | 134781132 | 134782086 |
| chr5 | 134781132 | 134785586 |
| chr5 | 134788512 | 134796150 |
| chr5 | 134790105 | 134796150 |
| chr5 | 134790105 | 134807941 |
| chr5 | 134790469 | 134796150 |
| chr5 | 134790469 | 134811358 |
| chr5 | 134790469 | 134819004 |
| chr5 | 134811220 | 134817714 |
| chr5 | 134816429 | 134817714 |
| chr5 | 134816429 | 134819004 |
| chr5 | 134817495 | 134819004 |
| chr5 | 134893491 | 134896424 |
| chr5 | 135343259 | 135353045 |
| chr5 | 135343259 | 135370142 |
| chr5 | 135360496 | 135370142 |
| chr5 | 135360496 | 135389126 |
| chr5 | 135369405 | 135370142 |
| chr5 | 135369405 | 135389126 |
| chr5 | 136147831 | 136154163 |
| chr5 | 136147831 | 136163391 |
| chr5 | 136147831 | 136174632 |
| chr5 | 136153591 | 136163391 |



|      |           |           |
|------|-----------|-----------|
| chr5 | 136160855 | 136174632 |
| chr5 | 137658130 | 137698408 |
| chr5 | 137692284 | 137720584 |
| chr5 | 137941943 | 137943216 |
| chr5 | 137942874 | 137943216 |
| chr5 | 137942874 | 137949184 |
| chr5 | 137948954 | 137962469 |
| chr5 | 137952627 | 137954376 |
| chr5 | 137959615 | 137962469 |
| chr5 | 137959615 | 138019146 |
| chr5 | 137985256 | 137988315 |
| chr5 | 137985256 | 138011149 |
| chr5 | 137985256 | 138018514 |
| chr5 | 137985256 | 138019146 |
| chr5 | 137985256 | 138021197 |
| chr5 | 138006989 | 138011149 |
| chr5 | 138006989 | 138011945 |
| chr5 | 138006989 | 138018514 |
| chr5 | 138006989 | 138019146 |
| chr5 | 138006989 | 138021197 |
| chr5 | 138011007 | 138011945 |
| chr5 | 138011007 | 138021197 |
| chr5 | 138018301 | 138021197 |
| chr5 | 138159554 | 138166727 |
| chr5 | 138161795 | 138164133 |
| chr5 | 138169221 | 138177667 |
| chr5 | 138189632 | 138202155 |
| chr5 | 138191473 | 138192657 |
| chr5 | 138191473 | 138201448 |
| chr5 | 138191473 | 138202155 |
| chr5 | 138198198 | 138202155 |
| chr5 | 138286021 | 138326054 |
| chr5 | 138289500 | 138292116 |
| chr5 | 138319218 | 138328529 |
| chr5 | 138319218 | 138329647 |
| chr5 | 138325814 | 138329647 |
| chr5 | 138372673 | 138375206 |
| chr5 | 138372673 | 138377825 |
| chr5 | 138372673 | 138379708 |
| chr5 | 138372673 | 138381590 |
| chr5 | 138372673 | 138386621 |
| chr5 | 138372673 | 138400012 |
| chr5 | 138375092 | 138381590 |
| chr5 | 138377719 | 138381590 |
| chr5 | 138381515 | 138386621 |

|      |           |           |
|------|-----------|-----------|
| chr5 | 138386021 | 138400012 |
| chr5 | 138386021 | 138420962 |
| chr5 | 138398177 | 138400012 |
| chr5 | 138420705 | 138425582 |
| chr5 | 138424074 | 138425582 |
| chr5 | 138424074 | 138430425 |
| chr5 | 138425410 | 138428086 |
| chr5 | 138429825 | 138431559 |
| chr5 | 138508668 | 138513706 |
| chr5 | 138510564 | 138512954 |
| chr5 | 138512763 | 138513706 |
| chr5 | 138513567 | 138517700 |
| chr5 | 138513567 | 138518867 |
| chr5 | 138513567 | 138529678 |
| chr5 | 138517560 | 138518867 |
| chr5 | 138517560 | 138529678 |
| chr5 | 138518691 | 138529678 |
| chr5 | 138557401 | 138561789 |
| chr5 | 138557401 | 138567722 |
| chr5 | 138557401 | 138574126 |
| chr5 | 138558552 | 138560091 |
| chr5 | 138559863 | 138561789 |
| chr5 | 138559863 | 138567722 |
| chr5 | 138561579 | 138567561 |
| chr5 | 138561579 | 138567722 |
| chr5 | 138566625 | 138567722 |
| chr5 | 138566625 | 138569049 |
| chr5 | 138567000 | 138573850 |
| chr5 | 138568924 | 138571141 |
| chr5 | 138568924 | 138573850 |
| chr5 | 138568924 | 138574126 |
| chr5 | 138781922 | 138783372 |
| chr5 | 138781922 | 138812302 |
| chr5 | 138781922 | 138827718 |
| chr5 | 138783176 | 138827718 |
| chr5 | 138810037 | 138812302 |
| chr5 | 138810037 | 138827718 |
| chr5 | 138810037 | 138887642 |
| chr5 | 138824529 | 138827718 |
| chr5 | 138824529 | 138904441 |
| chr5 | 138824529 | 138917898 |
| chr5 | 138886211 | 138904441 |
| chr5 | 138886211 | 138932712 |
| chr5 | 138951170 | 138951884 |
| chr5 | 139021170 | 139026992 |

|      |           |           |
|------|-----------|-----------|
| chr5 | 139026800 | 139051046 |
| chr5 | 13911385  | 13931244  |
| chr5 | 139121034 | 139127853 |
| chr5 | 13914519  | 13931244  |
| chr5 | 139276120 | 139279129 |
| chr5 | 139278326 | 139279129 |
| chr5 | 139314674 | 139319033 |
| chr5 | 139317052 | 139319033 |
| chr5 | 139317052 | 139319501 |
| chr5 | 139317052 | 139322967 |
| chr5 | 139318907 | 139319501 |
| chr5 | 139321897 | 139326284 |
| chr5 | 139363758 | 139364743 |
| chr5 | 139600371 | 139614966 |
| chr5 | 139600371 | 139623461 |
| chr5 | 139614585 | 139614966 |
| chr5 | 139614585 | 139623461 |
| chr5 | 139614696 | 139614966 |
| chr5 | 139614696 | 139623461 |
| chr5 | 139865548 | 139887511 |
| chr5 | 139871720 | 139880974 |
| chr5 | 139880855 | 139887511 |
| chr5 | 140281448 | 140300582 |
| chr5 | 140436103 | 140459355 |
| chr5 | 140438460 | 140445975 |
| chr5 | 140438460 | 140449305 |
| chr5 | 140438460 | 140487060 |
| chr5 | 140440118 | 140445975 |
| chr5 | 140440118 | 140449305 |
| chr5 | 140445741 | 140459355 |
| chr5 | 140449210 | 140464776 |
| chr5 | 140458624 | 140464776 |
| chr5 | 140482579 | 140487060 |
| chr5 | 140485120 | 140510181 |
| chr5 | 140485588 | 140506977 |
| chr5 | 140504820 | 140505869 |
| chr5 | 140504820 | 140506977 |
| chr5 | 140504820 | 140509812 |
| chr5 | 140506834 | 140513479 |
| chr5 | 140507784 | 140513479 |
| chr5 | 140509636 | 140510181 |
| chr5 | 140563593 | 140563915 |
| chr5 | 141534334 | 141579196 |
| chr5 | 141576229 | 141583615 |
| chr5 | 141580743 | 141583615 |

|      |           |           |
|------|-----------|-----------|
| chr5 | 141582311 | 141583615 |
| chr5 | 141638794 | 141640445 |
| chr5 | 141928150 | 141930274 |
| chr5 | 141933258 | 141934586 |
| chr5 | 141973582 | 141983552 |
| chr5 | 142131807 | 142135817 |
| chr5 | 142131807 | 142140629 |
| chr5 | 142131807 | 142144676 |
| chr5 | 142135729 | 142140629 |
| chr5 | 142135729 | 142144676 |
| chr5 | 142345415 | 142353583 |
| chr5 | 14270824  | 14280436  |
| chr5 | 14270824  | 14287063  |
| chr5 | 14270824  | 14297263  |
| chr5 | 14270824  | 14304592  |
| chr5 | 14270824  | 14316743  |
| chr5 | 14270824  | 14330900  |
| chr5 | 14270824  | 14336727  |
| chr5 | 14270824  | 14401064  |
| chr5 | 14280321  | 14304592  |
| chr5 | 14280321  | 14336727  |
| chr5 | 14286870  | 14304592  |
| chr5 | 14286870  | 14316743  |
| chr5 | 14286870  | 14336727  |
| chr5 | 142873399 | 142879445 |
| chr5 | 142873399 | 142885399 |
| chr5 | 142879373 | 142907804 |
| chr5 | 142879373 | 142913293 |
| chr5 | 142885297 | 142913293 |
| chr5 | 142885297 | 142932125 |
| chr5 | 142885297 | 143014116 |
| chr5 | 142885297 | 143057747 |
| chr5 | 142901934 | 142907804 |
| chr5 | 142901934 | 142932125 |
| chr5 | 14290715  | 14297263  |
| chr5 | 14290715  | 14304592  |
| chr5 | 14290715  | 14316743  |
| chr5 | 14290715  | 14330900  |
| chr5 | 14290715  | 14336727  |
| chr5 | 14290715  | 14359531  |
| chr5 | 14290715  | 14374343  |
| chr5 | 14293011  | 14304592  |
| chr5 | 14293011  | 14316743  |
| chr5 | 14293011  | 14336727  |
| chr5 | 14297071  | 14304592  |

|      |           |           |
|------|-----------|-----------|
| chr5 | 14297071  | 14316743  |
| chr5 | 14297071  | 14336727  |
| chr5 | 143014079 | 143057747 |
| chr5 | 143037195 | 143057747 |
| chr5 | 14304460  | 14316743  |
| chr5 | 14304460  | 14330900  |
| chr5 | 14304460  | 14336727  |
| chr5 | 143054438 | 143057747 |
| chr5 | 14316512  | 14330900  |
| chr5 | 14316512  | 14336727  |
| chr5 | 14316512  | 14381252  |
| chr5 | 1432463   | 1443242   |
| chr5 | 143295459 | 143300763 |
| chr5 | 143295459 | 143314168 |
| chr5 | 14330777  | 14336727  |
| chr5 | 143310096 | 143314168 |
| chr5 | 143310096 | 143400852 |
| chr5 | 14358177  | 14359531  |
| chr5 | 14358177  | 14374343  |
| chr5 | 14358177  | 14381252  |
| chr5 | 14358177  | 14401064  |
| chr5 | 14363731  | 14378127  |
| chr5 | 14363731  | 14381252  |
| chr5 | 14374228  | 14381252  |
| chr5 | 14389288  | 14472658  |
| chr5 | 14398879  | 14406672  |
| chr5 | 14405847  | 14406672  |
| chr5 | 14405847  | 14420021  |
| chr5 | 14476893  | 14502657  |
| chr5 | 14496878  | 14498640  |
| chr5 | 14498088  | 14502657  |
| chr5 | 145764930 | 145796547 |
| chr5 | 145764930 | 145820018 |
| chr5 | 145764930 | 145823134 |
| chr5 | 145796441 | 145823134 |
| chr5 | 145796441 | 145826200 |
| chr5 | 145817893 | 145823134 |
| chr5 | 14600964  | 14602332  |
| chr5 | 146120370 | 146124086 |
| chr5 | 146120370 | 146126545 |
| chr5 | 146128671 | 146143084 |
| chr5 | 146131018 | 146144349 |
| chr5 | 146132897 | 146143084 |
| chr5 | 146132897 | 146144349 |
| chr5 | 146140203 | 146144709 |

|      |           |           |
|------|-----------|-----------|
| chr5 | 146142871 | 146144709 |
| chr5 | 146144266 | 146144709 |
| chr5 | 146149621 | 146164471 |
| chr5 | 146160373 | 146164471 |
| chr5 | 146160373 | 146171990 |
| chr5 | 146160373 | 146172774 |
| chr5 | 146164309 | 146168265 |
| chr5 | 146164309 | 146172774 |
| chr5 | 146164309 | 146177665 |
| chr5 | 146168127 | 146171990 |
| chr5 | 146218984 | 146223527 |
| chr5 | 146218984 | 146229910 |
| chr5 | 146223402 | 146233743 |
| chr5 | 146223402 | 146237432 |
| chr5 | 146233449 | 146258593 |
| chr5 | 146233449 | 146271058 |
| chr5 | 146237297 | 146251875 |
| chr5 | 146251710 | 146255092 |
| chr5 | 146254942 | 146258593 |
| chr5 | 146254942 | 146260898 |
| chr5 | 146260744 | 146263631 |
| chr5 | 146263490 | 146271058 |
| chr5 | 146483539 | 146493038 |
| chr5 | 146483539 | 146503539 |
| chr5 | 146503374 | 146504006 |
| chr5 | 14673641  | 14681607  |
| chr5 | 14678680  | 14681607  |
| chr5 | 1470825   | 1489858   |
| chr5 | 14741826  | 14751239  |
| chr5 | 14741826  | 14758598  |
| chr5 | 14745869  | 14758598  |
| chr5 | 1477403   | 1489858   |
| chr5 | 1480941   | 1501603   |
| chr5 | 148394713 | 148402513 |
| chr5 | 148394713 | 148404822 |
| chr5 | 148394713 | 148410765 |
| chr5 | 148394713 | 148417204 |
| chr5 | 148394713 | 148425701 |
| chr5 | 148401981 | 148416070 |
| chr5 | 148406256 | 148410765 |
| chr5 | 148433423 | 148440527 |
| chr5 | 148548667 | 148550262 |
| chr5 | 1488390   | 1501603   |
| chr5 | 149210725 | 149233300 |
| chr5 | 1494699   | 1501603   |

|      |           |           |
|------|-----------|-----------|
| chr5 | 149505446 | 149513209 |
| chr5 | 149505446 | 149550181 |
| chr5 | 149505482 | 149550181 |
| chr5 | 149507026 | 149513209 |
| chr5 | 149509878 | 149513209 |
| chr5 | 149511793 | 149520388 |
| chr5 | 149517793 | 149525171 |
| chr5 | 149820432 | 149826885 |
| chr5 | 149836262 | 149842377 |
| chr5 | 149836262 | 149845914 |
| chr5 | 149899374 | 149915007 |
| chr5 | 150006472 | 150018697 |
| chr5 | 150361155 | 150367917 |
| chr5 | 150367843 | 150369602 |
| chr5 | 150367843 | 150372236 |
| chr5 | 150379228 | 150390023 |
| chr5 | 150387901 | 150390023 |
| chr5 | 150445608 | 150447735 |
| chr5 | 150532944 | 150535885 |
| chr5 | 150539227 | 150540264 |
| chr5 | 150541569 | 150542971 |
| chr5 | 150541569 | 150545486 |
| chr5 | 150541569 | 150549787 |
| chr5 | 150695505 | 150699271 |
| chr5 | 150730630 | 150733475 |
| chr5 | 151042539 | 151052259 |
| chr5 | 151049823 | 151063747 |
| chr5 | 151060317 | 151063747 |
| chr5 | 151060317 | 151065131 |
| chr5 | 151198996 | 151205475 |
| chr5 | 151458787 | 151467925 |
| chr5 | 151458787 | 151479489 |
| chr5 | 151786571 | 151791062 |
| chr5 | 151786571 | 151795575 |
| chr5 | 151786571 | 151797428 |
| chr5 | 151786571 | 151800869 |
| chr5 | 151786602 | 151791062 |
| chr5 | 151786602 | 151795575 |
| chr5 | 151786602 | 151800869 |
| chr5 | 151790322 | 151791062 |
| chr5 | 151790322 | 151794249 |
| chr5 | 151790322 | 151795575 |
| chr5 | 151790322 | 151799313 |
| chr5 | 151794158 | 151799313 |
| chr5 | 151797226 | 151799313 |

|      |           |           |
|------|-----------|-----------|
| chr5 | 151799211 | 151800869 |
| chr5 | 151799888 | 151800869 |
| chr5 | 153997802 | 154002969 |
| chr5 | 153997802 | 154034967 |
| chr5 | 154002846 | 154027334 |
| chr5 | 154011240 | 154034967 |
| chr5 | 154026398 | 154034967 |
| chr5 | 154029488 | 154034967 |
| chr5 | 154033790 | 154034967 |
| chr5 | 154294815 | 154298079 |
| chr5 | 154294815 | 154329738 |
| chr5 | 154294815 | 154386430 |
| chr5 | 154329571 | 154380631 |
| chr5 | 154790324 | 154792796 |
| chr5 | 154790324 | 154795319 |
| chr5 | 154790324 | 154799759 |
| chr5 | 154790324 | 154800042 |
| chr5 | 154790324 | 154811640 |
| chr5 | 154790644 | 154793723 |
| chr5 | 154790644 | 154811640 |
| chr5 | 154794099 | 154811640 |
| chr5 | 154865191 | 154872651 |
| chr5 | 154871729 | 154872651 |
| chr5 | 154901338 | 154913038 |
| chr5 | 154911726 | 154913038 |
| chr5 | 154911726 | 154928659 |
| chr5 | 154916997 | 154926074 |
| chr5 | 154919966 | 154937185 |
| chr5 | 154924468 | 154928659 |
| chr5 | 154924468 | 154936022 |
| chr5 | 154927384 | 154932250 |
| chr5 | 154950820 | 154960049 |
| chr5 | 157285338 | 157287108 |
| chr5 | 157285338 | 157296774 |
| chr5 | 157294782 | 157296774 |
| chr5 | 157294782 | 157304366 |
| chr5 | 157294782 | 157311781 |
| chr5 | 157359004 | 157361598 |
| chr5 | 157488264 | 157489186 |
| chr5 | 157492972 | 157494795 |
| chr5 | 157492972 | 157499662 |
| chr5 | 157509300 | 157513505 |
| chr5 | 157518822 | 157520031 |
| chr5 | 157518822 | 157537991 |
| chr5 | 157791702 | 157794972 |



|      |           |           |
|------|-----------|-----------|
| chr5 | 157791702 | 157803719 |
| chr5 | 157794897 | 157806112 |
| chr5 | 157803649 | 157817547 |
| chr5 | 157805865 | 157817547 |
| chr5 | 159181959 | 159203656 |
| chr5 | 159194715 | 159203656 |
| chr5 | 159268869 | 159275246 |
| chr5 | 159268869 | 159278354 |
| chr5 | 159272022 | 159275246 |
| chr5 | 160010499 | 160036803 |
| chr5 | 160010499 | 160043169 |
| chr5 | 160010499 | 160049662 |
| chr5 | 160035139 | 160036803 |
| chr5 | 160035139 | 160043169 |
| chr5 | 160035139 | 160049662 |
| chr5 | 160035139 | 160051183 |
| chr5 | 160080650 | 160094065 |
| chr5 | 160276268 | 160280738 |
| chr5 | 160422301 | 160422893 |
| chr5 | 160422301 | 160424330 |
| chr5 | 160422301 | 160427873 |
| chr5 | 162093827 | 162104026 |
| chr5 | 163469640 | 163471463 |
| chr5 | 163471184 | 163471463 |
| chr5 | 163513554 | 163517674 |
| chr5 | 16670525  | 16675150  |
| chr5 | 16673681  | 16680104  |
| chr5 | 16676030  | 16689919  |
| chr5 | 16700962  | 16702588  |
| chr5 | 16754827  | 16761546  |
| chr5 | 16758117  | 16763755  |
| chr5 | 16761463  | 16762637  |
| chr5 | 16762044  | 16762637  |
| chr5 | 16763480  | 16764396  |
| chr5 | 16763480  | 16766198  |
| chr5 | 16779544  | 16780608  |
| chr5 | 16779544  | 16781829  |
| chr5 | 16779544  | 16783469  |
| chr5 | 16779544  | 16794833  |
| chr5 | 16794645  | 16818167  |
| chr5 | 168371423 | 168399567 |
| chr5 | 168397723 | 168409995 |
| chr5 | 168399487 | 168406327 |
| chr5 | 168422007 | 168431444 |
| chr5 | 168428032 | 168431444 |

|      |           |           |
|------|-----------|-----------|
| chr5 | 168441681 | 168460742 |
| chr5 | 168453967 | 168460742 |
| chr5 | 168488601 | 168492847 |
| chr5 | 168488601 | 168494650 |
| chr5 | 168488601 | 168495436 |
| chr5 | 168488601 | 168497348 |
| chr5 | 168488601 | 168500720 |
| chr5 | 168493893 | 168494650 |
| chr5 | 168493893 | 168495436 |
| chr5 | 168493893 | 168497348 |
| chr5 | 168493893 | 168502105 |
| chr5 | 168493893 | 168518062 |
| chr5 | 168495314 | 168518062 |
| chr5 | 168500590 | 168502105 |
| chr5 | 168500590 | 168510686 |
| chr5 | 168500590 | 168516950 |
| chr5 | 168500590 | 168518062 |
| chr5 | 168506020 | 168510686 |
| chr5 | 168506020 | 168516950 |
| chr5 | 168510580 | 168516950 |
| chr5 | 168559031 | 168564065 |
| chr5 | 168559031 | 168566266 |
| chr5 | 168559031 | 168568998 |
| chr5 | 168561392 | 168566266 |
| chr5 | 168566012 | 168568998 |
| chr5 | 169591047 | 169594681 |
| chr5 | 170878096 | 170881896 |
| chr5 | 170878096 | 170892553 |
| chr5 | 170878096 | 170896115 |
| chr5 | 170878096 | 170924550 |
| chr5 | 170881805 | 170896115 |
| chr5 | 170892386 | 170896115 |
| chr5 | 170892386 | 170924550 |
| chr5 | 170896049 | 170924550 |
| chr5 | 170909660 | 170924550 |
| chr5 | 170909660 | 170968377 |
| chr5 | 170916464 | 170953702 |
| chr5 | 170918712 | 170953702 |
| chr5 | 170918712 | 170968377 |
| chr5 | 170919440 | 170968377 |
| chr5 | 171170129 | 171213738 |
| chr5 | 171183166 | 171205612 |
| chr5 | 171183321 | 171213738 |
| chr5 | 171183321 | 171221840 |
| chr5 | 171183321 | 171242820 |

|      |           |           |
|------|-----------|-----------|
| chr5 | 171199669 | 171221840 |
| chr5 | 171205523 | 171221840 |
| chr5 | 171221757 | 171242820 |
| chr5 | 171240927 | 171242820 |
| chr5 | 171390050 | 171391799 |
| chr5 | 171390050 | 171392978 |
| chr5 | 171391304 | 171392978 |
| chr5 | 171436092 | 171449253 |
| chr5 | 171868609 | 171900100 |
| chr5 | 171868609 | 171914405 |
| chr5 | 171876284 | 171878129 |
| chr5 | 171876284 | 171900100 |
| chr5 | 171891466 | 171900100 |
| chr5 | 171891466 | 171910797 |
| chr5 | 171891466 | 171914405 |
| chr5 | 171910571 | 171914405 |
| chr5 | 172055587 | 172057473 |
| chr5 | 172117480 | 172156788 |
| chr5 | 172346135 | 172347332 |
| chr5 | 172350362 | 172373815 |
| chr5 | 172358772 | 172362869 |
| chr5 | 172358772 | 172382127 |
| chr5 | 172362734 | 172382127 |
| chr5 | 172382035 | 172406352 |
| chr5 | 172897001 | 172914838 |
| chr5 | 172909666 | 172914838 |
| chr5 | 172924004 | 172935310 |
| chr5 | 172932435 | 172935310 |
| chr5 | 172959864 | 172968599 |
| chr5 | 173080584 | 173086626 |
| chr5 | 173080584 | 173091401 |
| chr5 | 173080584 | 173112379 |
| chr5 | 173108623 | 173110711 |
| chr5 | 173108623 | 173112379 |
| chr5 | 173944966 | 173953272 |
| chr5 | 175492094 | 175512196 |
| chr5 | 175509031 | 175512196 |
| chr5 | 175964950 | 175967267 |
| chr5 | 176289653 | 176296320 |
| chr5 | 176322272 | 176324757 |
| chr5 | 176336719 | 176337146 |
| chr5 | 176350612 | 176355749 |
| chr5 | 176352621 | 176355749 |
| chr5 | 176355570 | 176359567 |
| chr5 | 176479187 | 176489027 |

|      |           |           |
|------|-----------|-----------|
| chr5 | 176486354 | 176494275 |
| chr5 | 176498913 | 176500146 |
| chr5 | 176908522 | 176958154 |
| chr5 | 176943334 | 176951577 |
| chr5 | 176943334 | 176958154 |
| chr5 | 176943334 | 176969706 |
| chr5 | 176943334 | 176970866 |
| chr5 | 176943334 | 176982623 |
| chr5 | 176951473 | 176975480 |
| chr5 | 176951473 | 176982623 |
| chr5 | 176955958 | 176970866 |
| chr5 | 176955958 | 176982623 |
| chr5 | 176968554 | 176970866 |
| chr5 | 176970741 | 176982623 |
| chr5 | 176975395 | 176982623 |
| chr5 | 177041125 | 177044533 |
| chr5 | 177041125 | 177050936 |
| chr5 | 177135086 | 177192019 |
| chr5 | 177135086 | 177204292 |
| chr5 | 177135940 | 177192019 |
| chr5 | 177191883 | 177204292 |
| chr5 | 177191883 | 177212195 |
| chr5 | 177191883 | 177239865 |
| chr5 | 177235820 | 177239865 |
| chr5 | 177235820 | 177244270 |
| chr5 | 177238236 | 177239865 |
| chr5 | 177244194 | 177246796 |
| chr5 | 177244194 | 177248324 |
| chr5 | 177248180 | 177260168 |
| chr5 | 177251729 | 177257151 |
| chr5 | 177256950 | 177288925 |
| chr5 | 177269601 | 177283928 |
| chr5 | 177280564 | 177283928 |
| chr5 | 177280564 | 177288925 |
| chr5 | 177288818 | 177292158 |
| chr5 | 177334283 | 177338605 |
| chr5 | 177626435 | 177632738 |
| chr5 | 178147532 | 178147883 |
| chr5 | 178211889 | 178231523 |
| chr5 | 178222354 | 178222934 |
| chr5 | 178222354 | 178224729 |
| chr5 | 178222354 | 178225429 |
| chr5 | 178860996 | 178867071 |
| chr5 | 178912583 | 178913071 |
| chr5 | 179024969 | 179028127 |

|      |           |           |
|------|-----------|-----------|
| chr5 | 179152141 | 179158879 |
| chr5 | 179560024 | 179562664 |
| chr5 | 179560024 | 179569425 |
| chr5 | 179560024 | 179577136 |
| chr5 | 179562546 | 179569425 |
| chr5 | 179562546 | 179577136 |
| chr5 | 179562546 | 179585865 |
| chr5 | 179567460 | 179569425 |
| chr5 | 179567460 | 179577136 |
| chr5 | 179580946 | 179589647 |
| chr5 | 179580946 | 179593645 |
| chr5 | 179580946 | 179594963 |
| chr5 | 179585795 | 179596681 |
| chr5 | 179591624 | 179593645 |
| chr5 | 179591624 | 179594963 |
| chr5 | 179591624 | 179601986 |
| chr5 | 179594865 | 179596681 |
| chr5 | 179615545 | 179616958 |
| chr5 | 179616125 | 179616958 |
| chr5 | 179617513 | 179621397 |
| chr5 | 179617798 | 179621397 |
| chr5 | 179617988 | 179618323 |
| chr5 | 179620891 | 179623164 |
| chr5 | 179705678 | 179706331 |
| chr5 | 179705678 | 179707190 |
| chr5 | 179705678 | 179708380 |
| chr5 | 179705678 | 179709059 |
| chr5 | 179705678 | 179710065 |
| chr5 | 179705678 | 179716294 |
| chr5 | 179705678 | 179723019 |
| chr5 | 179705678 | 179724783 |
| chr5 | 179705678 | 179726759 |
| chr5 | 179706257 | 179716294 |
| chr5 | 179707131 | 179709059 |
| chr5 | 179707131 | 179710065 |
| chr5 | 179707131 | 179720560 |
| chr5 | 179708238 | 179709059 |
| chr5 | 179708238 | 179710065 |
| chr5 | 179709872 | 179716294 |
| chr5 | 179709872 | 179719781 |
| chr5 | 179709872 | 179720560 |
| chr5 | 179709872 | 179724783 |
| chr5 | 179719667 | 179720560 |
| chr5 | 179719667 | 179724783 |
| chr5 | 179765325 | 179769089 |

|      |           |           |
|------|-----------|-----------|
| chr5 | 179765325 | 179771243 |
| chr5 | 179768849 | 179771243 |
| chr5 | 179798512 | 179799121 |
| chr5 | 179822957 | 179824323 |
| chr5 | 179822957 | 179825226 |
| chr5 | 179822957 | 179833782 |
| chr5 | 179823857 | 179825226 |
| chr5 | 179824181 | 179833782 |
| chr5 | 179833031 | 179833782 |
| chr5 | 179840871 | 179853437 |
| chr5 | 179841906 | 179844227 |
| chr5 | 179841906 | 179853437 |
| chr5 | 179869768 | 179878523 |
| chr5 | 179872891 | 179904812 |
| chr5 | 179888102 | 179893467 |
| chr5 | 179888102 | 179894614 |
| chr5 | 179888102 | 179899307 |
| chr5 | 179891378 | 179894614 |
| chr5 | 179966805 | 179970506 |
| chr5 | 179966805 | 179980200 |
| chr5 | 179978202 | 180040647 |
| chr5 | 180238331 | 180241155 |
| chr5 | 180248972 | 180269409 |
| chr5 | 180248972 | 180280608 |
| chr5 | 180261683 | 180269409 |
| chr5 | 180261683 | 180280608 |
| chr5 | 180264780 | 180280608 |
| chr5 | 180269279 | 180280608 |
| chr5 | 180302422 | 180312544 |
| chr5 | 180316340 | 180317058 |
| chr5 | 180316340 | 180335953 |
| chr5 | 180316340 | 180336577 |
| chr5 | 180495420 | 180529388 |
| chr5 | 180529274 | 180550117 |
| chr5 | 180529274 | 180553471 |
| chr5 | 180549930 | 180553471 |
| chr5 | 180553385 | 180571432 |
| chr5 | 180569109 | 180571432 |
| chr5 | 181237608 | 181239582 |
| chr5 | 181238098 | 181241639 |
| chr5 | 181238098 | 181242345 |
| chr5 | 181239066 | 181242345 |
| chr5 | 181239486 | 181241639 |
| chr5 | 181241491 | 181242345 |
| chr5 | 21491320  | 21495182  |

|      |          |          |
|------|----------|----------|
| chr5 | 223481   | 228333   |
| chr5 | 223481   | 240476   |
| chr5 | 230875   | 251468   |
| chr5 | 250991   | 251468   |
| chr5 | 31406852 | 31410887 |
| chr5 | 31421271 | 31424471 |
| chr5 | 31421271 | 31451640 |
| chr5 | 31429474 | 31451640 |
| chr5 | 31435764 | 31451640 |
| chr5 | 31437238 | 31468063 |
| chr5 | 31448546 | 31451640 |
| chr5 | 31448546 | 31472232 |
| chr5 | 31448546 | 31486562 |
| chr5 | 31448546 | 31495372 |
| chr5 | 31483553 | 31486562 |
| chr5 | 31483553 | 31495372 |
| chr5 | 31504554 | 31521215 |
| chr5 | 31535743 | 31545712 |
| chr5 | 32135571 | 32143880 |
| chr5 | 32263112 | 32268794 |
| chr5 | 32268700 | 32276742 |
| chr5 | 32379114 | 32390437 |
| chr5 | 32379114 | 32420103 |
| chr5 | 32390274 | 32397338 |
| chr5 | 32397218 | 32404097 |
| chr5 | 32414968 | 32417792 |
| chr5 | 32588511 | 32599069 |
| chr5 | 33448540 | 33453412 |
| chr5 | 33454944 | 33457403 |
| chr5 | 33460901 | 33463825 |
| chr5 | 33576053 | 33596060 |
| chr5 | 33648821 | 33662040 |
| chr5 | 33998640 | 34005899 |
| chr5 | 34795938 | 34814669 |
| chr5 | 34808583 | 34811945 |
| chr5 | 34813573 | 34821850 |
| chr5 | 34918363 | 34923234 |
| chr5 | 34919839 | 34923234 |
| chr5 | 34922216 | 34923234 |
| chr5 | 34938857 | 34941183 |
| chr5 | 353729   | 376716   |
| chr5 | 353729   | 413433   |
| chr5 | 36136308 | 36143406 |
| chr5 | 36207169 | 36227565 |
| chr5 | 36211843 | 36227565 |

|      |          |          |
|------|----------|----------|
| chr5 | 36225541 | 36227565 |
| chr5 | 36953617 | 36958231 |
| chr5 | 36953617 | 36961583 |
| chr5 | 36953617 | 36962274 |
| chr5 | 36953617 | 36972041 |
| chr5 | 36953617 | 36976402 |
| chr5 | 36970875 | 36976402 |
| chr5 | 36984675 | 36995804 |
| chr5 | 37010086 | 37022149 |
| chr5 | 37044346 | 37052566 |
| chr5 | 37114959 | 37120340 |
| chr5 | 37114959 | 37121784 |
| chr5 | 37114959 | 37122488 |
| chr5 | 37114959 | 37125409 |
| chr5 | 37120215 | 37121784 |
| chr5 | 37120215 | 37122488 |
| chr5 | 37120215 | 37125409 |
| chr5 | 37120215 | 37162566 |
| chr5 | 37153739 | 37162566 |
| chr5 | 37153739 | 37165671 |
| chr5 | 37164272 | 37167213 |
| chr5 | 37165538 | 37169561 |
| chr5 | 37170040 | 37175986 |
| chr5 | 37173754 | 37179443 |
| chr5 | 37179360 | 37181005 |
| chr5 | 37187413 | 37187842 |
| chr5 | 37187413 | 37201808 |
| chr5 | 37195857 | 37201808 |
| chr5 | 37198701 | 37201808 |
| chr5 | 37213558 | 37224740 |
| chr5 | 37213558 | 37239869 |
| chr5 | 37221323 | 37224740 |
| chr5 | 37238856 | 37239869 |
| chr5 | 37238856 | 37245845 |
| chr5 | 37238856 | 37247745 |
| chr5 | 37243012 | 37244607 |
| chr5 | 37243012 | 37247745 |
| chr5 | 37244374 | 37247745 |
| chr5 | 37292878 | 37299568 |
| chr5 | 37292878 | 37307432 |
| chr5 | 37292878 | 37310743 |
| chr5 | 37301436 | 37303414 |
| chr5 | 37301436 | 37305210 |
| chr5 | 37301436 | 37309267 |
| chr5 | 37301436 | 37318085 |



|      |          |          |
|------|----------|----------|
| chr5 | 37301436 | 37324107 |
| chr5 | 37302778 | 37303414 |
| chr5 | 37302778 | 37305210 |
| chr5 | 37302778 | 37307432 |
| chr5 | 37302778 | 37324107 |
| chr5 | 37309128 | 37314328 |
| chr5 | 37325900 | 37328420 |
| chr5 | 37325900 | 37358151 |
| chr5 | 37329189 | 37331795 |
| chr5 | 37331684 | 37333633 |
| chr5 | 37331684 | 37341242 |
| chr5 | 37333462 | 37341242 |
| chr5 | 37341089 | 37348596 |
| chr5 | 37342548 | 37350265 |
| chr5 | 37342548 | 37351356 |
| chr5 | 37342548 | 37352829 |
| chr5 | 37348504 | 37358151 |
| chr5 | 37349171 | 37358151 |
| chr5 | 37351189 | 37352829 |
| chr5 | 37351189 | 37358151 |
| chr5 | 37358080 | 37364384 |
| chr5 | 37391999 | 37443372 |
| chr5 | 37437921 | 37605238 |
| chr5 | 37479833 | 37605238 |
| chr5 | 37605063 | 37697754 |
| chr5 | 37605063 | 37703087 |
| chr5 | 37697654 | 37703087 |
| chr5 | 37701057 | 37727045 |
| chr5 | 37721114 | 37727045 |
| chr5 | 38510463 | 38530666 |
| chr5 | 38523418 | 38530666 |
| chr5 | 38527154 | 38530666 |
| chr5 | 38869031 | 38885484 |
| chr5 | 38876200 | 38885484 |
| chr5 | 38903881 | 38921794 |
| chr5 | 38903881 | 38924595 |
| chr5 | 38967160 | 38968030 |
| chr5 | 38971876 | 38978650 |
| chr5 | 38971876 | 38982036 |
| chr5 | 38981866 | 39021136 |
| chr5 | 38990948 | 38996882 |
| chr5 | 38990948 | 39003622 |
| chr5 | 38990948 | 39021136 |
| chr5 | 38996818 | 39003622 |
| chr5 | 38996818 | 39021136 |

|      |          |          |
|------|----------|----------|
| chr5 | 39002534 | 39021136 |
| chr5 | 40728344 | 40730343 |
| chr5 | 40728344 | 40747019 |
| chr5 | 40764513 | 40767690 |
| chr5 | 40764513 | 40771863 |
| chr5 | 40764513 | 40775503 |
| chr5 | 40764513 | 40777586 |
| chr5 | 40767465 | 40775503 |
| chr5 | 40771718 | 40777586 |
| chr5 | 41739389 | 41762200 |
| chr5 | 41739389 | 41794078 |
| chr5 | 41739389 | 41807438 |
| chr5 | 41749526 | 41805681 |
| chr5 | 41762110 | 41807438 |
| chr5 | 41794002 | 41801070 |
| chr5 | 41794002 | 41807438 |
| chr5 | 41840450 | 41853554 |
| chr5 | 41840450 | 41862750 |
| chr5 | 41850029 | 41862750 |
| chr5 | 41927012 | 41929917 |
| chr5 | 41927012 | 41934308 |
| chr5 | 42688889 | 42700002 |
| chr5 | 42688889 | 42718121 |
| chr5 | 43122038 | 43123310 |
| chr5 | 43122038 | 43139309 |
| chr5 | 43292473 | 43297166 |
| chr5 | 43292473 | 43298975 |
| chr5 | 43292473 | 43307824 |
| chr5 | 43292847 | 43297166 |
| chr5 | 43294055 | 43297166 |
| chr5 | 43294055 | 43298975 |
| chr5 | 43294690 | 43298975 |
| chr5 | 43295751 | 43297166 |
| chr5 | 43298008 | 43298975 |
| chr5 | 43609142 | 43659350 |
| chr5 | 43609142 | 43677806 |
| chr5 | 43612907 | 43628387 |
| chr5 | 43628199 | 43659350 |
| chr5 | 43628199 | 43677806 |
| chr5 | 43644191 | 43659350 |
| chr5 | 50399858 | 50411383 |
| chr5 | 50402285 | 50405852 |
| chr5 | 50402285 | 50411383 |
| chr5 | 50668070 | 50788589 |
| chr5 | 50750150 | 50763242 |

|      |          |          |
|------|----------|----------|
| chr5 | 50750150 | 50778650 |
| chr5 | 50750150 | 50788589 |
| chr5 | 50759642 | 50763242 |
| chr5 | 50759642 | 50797233 |
| chr5 | 50788522 | 50797032 |
| chr5 | 50788522 | 50797233 |
| chr5 | 50821212 | 50828384 |
| chr5 | 5187724  | 5209246  |
| chr5 | 5209092  | 5232516  |
| chr5 | 5222788  | 5242191  |
| chr5 | 53045000 | 53051559 |
| chr5 | 53071937 | 53073259 |
| chr5 | 53646232 | 53658624 |
| chr5 | 5441111  | 5444326  |
| chr5 | 5441111  | 5447897  |
| chr5 | 5447426  | 5447897  |
| chr5 | 5466333  | 5476079  |
| chr5 | 55267137 | 55272175 |
| chr5 | 55274613 | 55281515 |
| chr5 | 55322326 | 55324198 |
| chr5 | 55322326 | 55328811 |
| chr5 | 55327715 | 55341771 |
| chr5 | 55340009 | 55358698 |
| chr5 | 55340009 | 55379195 |
| chr5 | 55340009 | 55400421 |
| chr5 | 55343330 | 55351029 |
| chr5 | 55343330 | 55358698 |
| chr5 | 55343330 | 55366875 |
| chr5 | 55349572 | 55366875 |
| chr5 | 55353167 | 55379195 |
| chr5 | 55397415 | 55416132 |
| chr5 | 55400232 | 55405588 |
| chr5 | 55405424 | 55422982 |
| chr5 | 55649206 | 55652723 |
| chr5 | 55649206 | 55664863 |
| chr5 | 55649206 | 55672695 |
| chr5 | 55652528 | 55664863 |
| chr5 | 55947492 | 55968396 |
| chr5 | 55952249 | 55969855 |
| chr5 | 55960401 | 55968396 |
| chr5 | 55968275 | 55969855 |
| chr5 | 56856599 | 56865977 |
| chr5 | 56864733 | 56865977 |
| chr5 | 57230845 | 57231321 |
| chr5 | 57230845 | 57247215 |

|      |          |          |
|------|----------|----------|
| chr5 | 57235965 | 57249576 |
| chr5 | 57246299 | 57247215 |
| chr5 | 57246299 | 57249576 |
| chr5 | 58988492 | 58993465 |
| chr5 | 58988492 | 59038971 |
| chr5 | 60638749 | 60647533 |
| chr5 | 60642811 | 60647533 |
| chr5 | 60644744 | 60647533 |
| chr5 | 60887439 | 60902508 |
| chr5 | 60918264 | 60928959 |
| chr5 | 61472680 | 61494410 |
| chr5 | 61490785 | 61494410 |
| chr5 | 618989   | 620261   |
| chr5 | 618989   | 624579   |
| chr5 | 618989   | 644425   |
| chr5 | 62347129 | 62350120 |
| chr5 | 62347129 | 62357745 |
| chr5 | 62361241 | 62363320 |
| chr5 | 62362449 | 62363899 |
| chr5 | 62362449 | 62373837 |
| chr5 | 62362449 | 62381253 |
| chr5 | 62363177 | 62366481 |
| chr5 | 62390875 | 62394607 |
| chr5 | 62437273 | 62451933 |
| chr5 | 62437273 | 62474464 |
| chr5 | 62437273 | 62561257 |
| chr5 | 62449926 | 62451933 |
| chr5 | 62470249 | 62494124 |
| chr5 | 62476682 | 62494124 |
| chr5 | 62476682 | 62515501 |
| chr5 | 62504666 | 62515501 |
| chr5 | 62526141 | 62561257 |
| chr5 | 62530708 | 62551336 |
| chr5 | 62530708 | 62561257 |
| chr5 | 62530708 | 62591672 |
| chr5 | 62536701 | 62601848 |
| chr5 | 62550366 | 62561257 |
| chr5 | 62550366 | 62591672 |
| chr5 | 633768   | 644425   |
| chr5 | 64325185 | 64330406 |
| chr5 | 64785480 | 64804386 |
| chr5 | 64788950 | 64804386 |
| chr5 | 65170616 | 65173008 |
| chr5 | 65170616 | 65197151 |
| chr5 | 65170616 | 65215487 |

|      |          |          |
|------|----------|----------|
| chr5 | 65188015 | 65197151 |
| chr5 | 65188015 | 65215487 |
| chr5 | 65214793 | 65471142 |
| chr5 | 65224319 | 65226219 |
| chr5 | 65224319 | 65242206 |
| chr5 | 65224319 | 65291470 |
| chr5 | 65242103 | 65273447 |
| chr5 | 65242103 | 65291470 |
| chr5 | 65242103 | 65300131 |
| chr5 | 65242103 | 65334085 |
| chr5 | 65242103 | 65473952 |
| chr5 | 65260599 | 65273447 |
| chr5 | 65260599 | 65291470 |
| chr5 | 65260599 | 65300131 |
| chr5 | 65260599 | 65334085 |
| chr5 | 65260599 | 65452918 |
| chr5 | 65273339 | 65291470 |
| chr5 | 65273339 | 65300131 |
| chr5 | 65291328 | 65300131 |
| chr5 | 65291328 | 65334085 |
| chr5 | 65291328 | 65471142 |
| chr5 | 65299984 | 65334085 |
| chr5 | 65329377 | 65473952 |
| chr5 | 65451474 | 65452918 |
| chr5 | 65451474 | 65460338 |
| chr5 | 65451474 | 65471142 |
| chr5 | 65451474 | 65473952 |
| chr5 | 65452132 | 65473952 |
| chr5 | 65470777 | 65473952 |
| chr5 | 65521474 | 65529199 |
| chr5 | 65521474 | 65542848 |
| chr5 | 65521474 | 65554946 |
| chr5 | 65528451 | 65529199 |
| chr5 | 65528451 | 65542848 |
| chr5 | 65528451 | 65552549 |
| chr5 | 65567512 | 65572286 |
| chr5 | 65604910 | 65618255 |
| chr5 | 65635300 | 65637780 |
| chr5 | 65635300 | 65650882 |
| chr5 | 65650809 | 65658501 |
| chr5 | 65671914 | 65704378 |
| chr5 | 65680493 | 65685472 |
| chr5 | 65704278 | 65708558 |
| chr5 | 65704278 | 65713064 |
| chr5 | 65758566 | 65763108 |

|      |          |          |
|------|----------|----------|
| chr5 | 65777426 | 65781421 |
| chr5 | 65780178 | 65788484 |
| chr5 | 65780178 | 65792655 |
| chr5 | 65988634 | 65994864 |
| chr5 | 65988634 | 66014725 |
| chr5 | 65988634 | 66023364 |
| chr5 | 65988634 | 66038482 |
| chr5 | 65992709 | 65994864 |
| chr5 | 65992709 | 66014725 |
| chr5 | 65994746 | 66014725 |
| chr5 | 65994746 | 66028343 |
| chr5 | 66012048 | 66014725 |
| chr5 | 66012048 | 66023364 |
| chr5 | 66012048 | 66025977 |
| chr5 | 66012048 | 66028343 |
| chr5 | 66021321 | 66028343 |
| chr5 | 66021321 | 66038482 |
| chr5 | 66024305 | 66044310 |
| chr5 | 6604137  | 6605408  |
| chr5 | 66043076 | 66044310 |
| chr5 | 6610954  | 6611798  |
| chr5 | 66153462 | 66159334 |
| chr5 | 66158808 | 66164897 |
| chr5 | 6616726  | 6625669  |
| chr5 | 6622015  | 6625669  |
| chr5 | 6623213  | 6625669  |
| chr5 | 6651841  | 6662966  |
| chr5 | 6737509  | 6739852  |
| chr5 | 6737509  | 6742597  |
| chr5 | 6737509  | 6746427  |
| chr5 | 6737509  | 6748590  |
| chr5 | 6737509  | 6750503  |
| chr5 | 6737509  | 6753037  |
| chr5 | 6739731  | 6746427  |
| chr5 | 69100806 | 69108436 |
| chr5 | 69104630 | 69108436 |
| chr5 | 69104630 | 69114496 |
| chr5 | 69123198 | 69128132 |
| chr5 | 69171269 | 69174409 |
| chr5 | 69174876 | 69175537 |
| chr5 | 69191794 | 69197109 |
| chr5 | 69191794 | 69202970 |
| chr5 | 69194646 | 69202970 |
| chr5 | 69226337 | 69228387 |
| chr5 | 69252417 | 69262304 |

|      |          |          |
|------|----------|----------|
| chr5 | 69258042 | 69259936 |
| chr5 | 69258042 | 69262304 |
| chr5 | 69258042 | 69269293 |
| chr5 | 69262204 | 69269293 |
| chr5 | 69285336 | 69300127 |
| chr5 | 69294792 | 69311204 |
| chr5 | 69300011 | 69311204 |
| chr5 | 69355648 | 69355953 |
| chr5 | 69371034 | 69374711 |
| chr5 | 69373829 | 69374711 |
| chr5 | 69373829 | 69384933 |
| chr5 | 69381900 | 69389145 |
| chr5 | 69419370 | 69424636 |
| chr5 | 69513947 | 69534839 |
| chr5 | 69513947 | 69548101 |
| chr5 | 69513947 | 69551585 |
| chr5 | 69534693 | 69548101 |
| chr5 | 69566966 | 69572550 |
| chr5 | 69579020 | 69579864 |
| chr5 | 69585593 | 69586356 |
| chr5 | 70063414 | 70070751 |
| chr5 | 71055351 | 71062796 |
| chr5 | 71461816 | 71470489 |
| chr5 | 71495249 | 71502791 |
| chr5 | 71501561 | 71504751 |
| chr5 | 71517321 | 71522949 |
| chr5 | 71522288 | 71544507 |
| chr5 | 71545038 | 71549606 |
| chr5 | 71548681 | 71549606 |
| chr5 | 71548681 | 71560237 |
| chr5 | 71553115 | 71560237 |
| chr5 | 71559981 | 71562520 |
| chr5 | 71592925 | 71596364 |
| chr5 | 71592925 | 71599760 |
| chr5 | 71592925 | 71604468 |
| chr5 | 71596279 | 71604468 |
| chr5 | 71604355 | 71646277 |
| chr5 | 71632120 | 71650183 |
| chr5 | 72223682 | 72238128 |
| chr5 | 72232442 | 72238128 |
| chr5 | 72331257 | 72335885 |
| chr5 | 72848384 | 72865729 |
| chr5 | 72855773 | 72865729 |
| chr5 | 72855773 | 72875737 |
| chr5 | 72861807 | 72865729 |

|      |          |          |
|------|----------|----------|
| chr5 | 72861807 | 72875737 |
| chr5 | 72861807 | 72877346 |
| chr5 | 72861807 | 72887222 |
| chr5 | 72861807 | 72893703 |
| chr5 | 72872638 | 72883232 |
| chr5 | 72877227 | 72883232 |
| chr5 | 72887069 | 72888303 |
| chr5 | 72887069 | 72889957 |
| chr5 | 72888077 | 72889957 |
| chr5 | 72889785 | 72905445 |
| chr5 | 72968497 | 73006549 |
| chr5 | 72989426 | 72990864 |
| chr5 | 72989426 | 73017308 |
| chr5 | 73006444 | 73017308 |
| chr5 | 73006444 | 73041315 |
| chr5 | 73037142 | 73052507 |
| chr5 | 73051348 | 73054549 |
| chr5 | 73051348 | 73068779 |
| chr5 | 73051348 | 73082825 |
| chr5 | 73058432 | 73077493 |
| chr5 | 73074741 | 73077493 |
| chr5 | 73074741 | 73078312 |
| chr5 | 73074741 | 73082825 |
| chr5 | 73078179 | 73082825 |
| chr5 | 73749836 | 73753202 |
| chr5 | 73749836 | 73776696 |
| chr5 | 73749836 | 73780745 |
| chr5 | 73749836 | 73794454 |
| chr5 | 73749836 | 73795391 |
| chr5 | 73773854 | 73776696 |
| chr5 | 73773854 | 73780745 |
| chr5 | 73773854 | 73795391 |
| chr5 | 73794401 | 73832459 |
| chr5 | 73832337 | 73852692 |
| chr5 | 73832337 | 73858219 |
| chr5 | 73832337 | 73873246 |
| chr5 | 73840479 | 73852692 |
| chr5 | 73840479 | 73858219 |
| chr5 | 73852649 | 73898093 |
| chr5 | 73857655 | 73858219 |
| chr5 | 73868099 | 73870209 |
| chr5 | 73892051 | 73901284 |
| chr5 | 73904221 | 73911575 |
| chr5 | 74715509 | 74716673 |
| chr5 | 74722378 | 74741609 |



|      |          |          |
|------|----------|----------|
| chr5 | 74722378 | 74745857 |
| chr5 | 74725639 | 74726126 |
| chr5 | 74745677 | 74750667 |
| chr5 | 74745677 | 74751493 |
| chr5 | 74747691 | 74763766 |
| chr5 | 74750578 | 74751493 |
| chr5 | 74758848 | 74763766 |
| chr5 | 74796029 | 74805284 |
| chr5 | 74796029 | 74814019 |
| chr5 | 74796029 | 74839050 |
| chr5 | 74796029 | 74841679 |
| chr5 | 74804492 | 74841679 |
| chr5 | 74813839 | 74834597 |
| chr5 | 74813839 | 74841679 |
| chr5 | 74834425 | 74841679 |
| chr5 | 74838964 | 74841679 |
| chr5 | 74840073 | 74841679 |
| chr5 | 75343852 | 75345658 |
| chr5 | 75384641 | 75400297 |
| chr5 | 75399309 | 75411103 |
| chr5 | 75400204 | 75411103 |
| chr5 | 75411010 | 75417033 |
| chr5 | 75411010 | 75426478 |
| chr5 | 75416875 | 75426478 |
| chr5 | 75416875 | 75459181 |
| chr5 | 75547009 | 75552591 |
| chr5 | 75547009 | 75569492 |
| chr5 | 75569339 | 75590440 |
| chr5 | 75685206 | 75692500 |
| chr5 | 75685206 | 75702810 |
| chr5 | 75694654 | 75707875 |
| chr5 | 77034417 | 77036720 |
| chr5 | 77034417 | 77039719 |
| chr5 | 77046346 | 77048272 |
| chr5 | 77046346 | 77048987 |
| chr5 | 77048935 | 77055596 |
| chr5 | 77053964 | 77055596 |
| chr5 | 77449759 | 77453928 |
| chr5 | 77449759 | 77463226 |
| chr5 | 77449759 | 77464809 |
| chr5 | 77449759 | 77489572 |
| chr5 | 77451290 | 77464809 |
| chr5 | 77459061 | 77464809 |
| chr5 | 78015409 | 78165672 |
| chr5 | 78020691 | 78039274 |

|      |          |          |
|------|----------|----------|
| chr5 | 78020691 | 78101025 |
| chr5 | 78089392 | 78128160 |
| chr5 | 78089392 | 78129307 |
| chr5 | 78089392 | 78165672 |
| chr5 | 78100952 | 78129307 |
| chr5 | 78100952 | 78165672 |
| chr5 | 78110206 | 78165672 |
| chr5 | 78113751 | 78165672 |
| chr5 | 78128029 | 78165672 |
| chr5 | 78156257 | 78165672 |
| chr5 | 78156257 | 78216237 |
| chr5 | 78156257 | 78267595 |
| chr5 | 78162818 | 78181662 |
| chr5 | 78165609 | 78216237 |
| chr5 | 78175625 | 78181662 |
| chr5 | 78216054 | 78228239 |
| chr5 | 78216054 | 78267595 |
| chr5 | 78388836 | 78421960 |
| chr5 | 78388836 | 78459362 |
| chr5 | 78415519 | 78421960 |
| chr5 | 7870769  | 7885854  |
| chr5 | 7875257  | 7885854  |
| chr5 | 7875257  | 7897247  |
| chr5 | 78839355 | 78955502 |
| chr5 | 7889094  | 7897247  |
| chr5 | 78955294 | 78969192 |
| chr5 | 78955294 | 78985558 |
| chr5 | 7895733  | 7897247  |
| chr5 | 78964415 | 78985558 |
| chr5 | 79314256 | 79316310 |
| chr5 | 79396822 | 79457018 |
| chr5 | 79439009 | 79451121 |
| chr5 | 79439009 | 79457018 |
| chr5 | 79447052 | 79457018 |
| chr5 | 79613010 | 79648693 |
| chr5 | 79619611 | 79620083 |
| chr5 | 79619611 | 79623489 |
| chr5 | 79640850 | 79642910 |
| chr5 | 79645122 | 79649190 |
| chr5 | 79645122 | 79669028 |
| chr5 | 79656957 | 79669028 |
| chr5 | 79668891 | 79682061 |
| chr5 | 79986949 | 79990236 |
| chr5 | 801099   | 821895   |
| chr5 | 80174953 | 80178064 |

|      |          |          |
|------|----------|----------|
| chr5 | 80177314 | 80178064 |
| chr5 | 80434108 | 80440032 |
| chr5 | 80434108 | 80445405 |
| chr5 | 80434108 | 80459494 |
| chr5 | 80443122 | 80445405 |
| chr5 | 80449590 | 80474830 |
| chr5 | 80455691 | 80474830 |
| chr5 | 80519692 | 80522138 |
| chr5 | 80656410 | 80679093 |
| chr5 | 80665142 | 80679093 |
| chr5 | 80678926 | 80728965 |
| chr5 | 80678926 | 80744615 |
| chr5 | 80678926 | 80769003 |
| chr5 | 80725452 | 80741548 |
| chr5 | 80725452 | 80744615 |
| chr5 | 80725452 | 80761678 |
| chr5 | 80728850 | 80744615 |
| chr5 | 80767932 | 80778836 |
| chr5 | 80767932 | 80792844 |
| chr5 | 80775693 | 80778836 |
| chr5 | 80775693 | 80787672 |
| chr5 | 80775693 | 80792844 |
| chr5 | 80775693 | 80813741 |
| chr5 | 80778719 | 80792844 |
| chr5 | 80787564 | 80792844 |
| chr5 | 81086834 | 81092961 |
| chr5 | 81489249 | 81650339 |
| chr5 | 81976192 | 81987678 |
| chr5 | 81987558 | 82178587 |
| chr5 | 82058494 | 82178587 |
| chr5 | 82164398 | 82178587 |
| chr5 | 82276397 | 82277852 |
| chr5 | 83104909 | 83111203 |
| chr5 | 83104909 | 83204921 |
| chr5 | 83104909 | 83258677 |
| chr5 | 83195769 | 83204921 |
| chr5 | 83203551 | 83258677 |
| chr5 | 84060299 | 84066606 |
| chr5 | 87331347 | 87338091 |
| chr5 | 87331347 | 87341321 |
| chr5 | 87331347 | 87346724 |
| chr5 | 87331347 | 87349364 |
| chr5 | 87331347 | 87353235 |
| chr5 | 87331347 | 87362671 |
| chr5 | 87332506 | 87346724 |

|      |          |          |
|------|----------|----------|
| chr5 | 87332506 | 87349364 |
| chr5 | 87341289 | 87353235 |
| chr5 | 87372117 | 87374916 |
| chr5 | 881106   | 889766   |
| chr5 | 88196375 | 88203075 |
| chr5 | 88202961 | 88240916 |
| chr5 | 88225768 | 88228528 |
| chr5 | 886591   | 891854   |
| chr5 | 887360   | 891854   |
| chr5 | 90405684 | 90407834 |
| chr5 | 90485524 | 90506674 |
| chr5 | 90487999 | 90501988 |
| chr5 | 907129   | 911996   |
| chr5 | 91373683 | 91378775 |
| chr5 | 91376620 | 91378775 |
| chr5 | 93544794 | 93563463 |
| chr5 | 93553760 | 93563463 |
| chr5 | 93824147 | 93881688 |
| chr5 | 93958776 | 94053227 |
| chr5 | 93958776 | 94074769 |
| chr5 | 94050730 | 94053227 |
| chr5 | 94050730 | 94074769 |
| chr5 | 94628810 | 94630743 |
| chr5 | 94628810 | 94643435 |
| chr5 | 94643272 | 94651845 |
| chr5 | 94654629 | 94663908 |
| chr5 | 94662297 | 94671008 |
| chr5 | 94670150 | 94678955 |
| chr5 | 94868332 | 94924021 |
| chr5 | 94888878 | 94912976 |
| chr5 | 94909250 | 94912976 |
| chr5 | 94909250 | 94924021 |
| chr5 | 95490907 | 95495017 |
| chr5 | 95494681 | 95498591 |
| chr5 | 95506933 | 95517060 |
| chr5 | 95736888 | 95763620 |
| chr5 | 95736888 | 95768166 |
| chr5 | 95736888 | 95783963 |
| chr5 | 95748332 | 95763620 |
| chr5 | 95752238 | 95768166 |
| chr5 | 95755395 | 95763620 |
| chr5 | 95755395 | 95783963 |
| chr5 | 95763507 | 95780425 |
| chr5 | 95763507 | 95783963 |
| chr5 | 95763507 | 95788858 |

|      |           |           |
|------|-----------|-----------|
| chr5 | 95768045  | 95783963  |
| chr5 | 95768045  | 95788858  |
| chr5 | 95898239  | 95906782  |
| chr5 | 95906522  | 95913934  |
| chr5 | 95906522  | 95919545  |
| chr5 | 95913770  | 95943049  |
| chr5 | 96722638  | 96729725  |
| chr5 | 96722638  | 96730860  |
| chr5 | 96729152  | 96737947  |
| chr5 | 96736171  | 96741580  |
| chr5 | 96750586  | 96754741  |
| chr5 | 96912636  | 96913457  |
| chr5 | 96912636  | 96915769  |
| chr5 | 96979137  | 96986670  |
| chr5 | 96985079  | 96986670  |
| chr5 | 97024520  | 97026757  |
| chr5 | 98868494  | 98872555  |
| chr5 | 98879551  | 98881375  |
| chr5 | 98885577  | 98889238  |
| chr5 | 98892524  | 98894686  |
| chr6 | 100589633 | 100607088 |
| chr6 | 100589633 | 100631213 |
| chr6 | 100589633 | 100638821 |
| chr6 | 100589633 | 100767345 |
| chr6 | 100625191 | 100631213 |
| chr6 | 100625191 | 100662536 |
| chr6 | 100650537 | 100662536 |
| chr6 | 100652724 | 100662536 |
| chr6 | 100679617 | 100805880 |
| chr6 | 100715461 | 100725703 |
| chr6 | 100715461 | 100798838 |
| chr6 | 100715461 | 100805880 |
| chr6 | 100766564 | 100767345 |
| chr6 | 100766564 | 100805880 |
| chr6 | 100798712 | 100800504 |
| chr6 | 100798712 | 100805880 |
| chr6 | 10400447  | 10402610  |
| chr6 | 10404507  | 10410335  |
| chr6 | 104744159 | 104750472 |
| chr6 | 104744159 | 104772074 |
| chr6 | 104744159 | 104777317 |
| chr6 | 104744159 | 104785319 |
| chr6 | 104771192 | 104772074 |
| chr6 | 104771192 | 104796756 |
| chr6 | 104784085 | 104849246 |

|      |           |           |
|------|-----------|-----------|
| chr6 | 104791503 | 104797025 |
| chr6 | 104795578 | 104852371 |
| chr6 | 104796654 | 104811393 |
| chr6 | 104796654 | 104833173 |
| chr6 | 104811310 | 104843298 |
| chr6 | 104811310 | 104849246 |
| chr6 | 104833041 | 104843298 |
| chr6 | 104833041 | 104849246 |
| chr6 | 104833041 | 104850996 |
| chr6 | 104833041 | 104852371 |
| chr6 | 104843222 | 104849246 |
| chr6 | 105115685 | 105116868 |
| chr6 | 105115685 | 105133588 |
| chr6 | 105124546 | 105133588 |
| chr6 | 10527473  | 10529836  |
| chr6 | 105323664 | 105333505 |
| chr6 | 106201971 | 106248244 |
| chr6 | 106201971 | 106293106 |
| chr6 | 106248149 | 106279823 |
| chr6 | 106248149 | 106293106 |
| chr6 | 106248149 | 106308491 |
| chr6 | 106248149 | 106316266 |
| chr6 | 106279660 | 106308491 |
| chr6 | 106544570 | 106544933 |
| chr6 | 106583327 | 106602922 |
| chr6 | 106583327 | 106622969 |
| chr6 | 10697323  | 10702639  |
| chr6 | 10702368  | 10702639  |
| chr6 | 10702368  | 10704844  |
| chr6 | 10703404  | 10704844  |
| chr6 | 107039748 | 107044332 |
| chr6 | 10724569  | 10726008  |
| chr6 | 10749201  | 10755232  |
| chr6 | 107503656 | 107506427 |
| chr6 | 107503656 | 107533610 |
| chr6 | 107876563 | 107883146 |
| chr6 | 107881148 | 107883146 |
| chr6 | 107893481 | 107924932 |
| chr6 | 107901369 | 107902998 |
| chr6 | 107901369 | 107924932 |
| chr6 | 107901369 | 107929514 |
| chr6 | 107904628 | 107906777 |
| chr6 | 107904628 | 107924932 |
| chr6 | 107911345 | 107924932 |
| chr6 | 107912715 | 107924932 |

|      |           |           |
|------|-----------|-----------|
| chr6 | 107921796 | 107924932 |
| chr6 | 107921796 | 107929514 |
| chr6 | 108049252 | 108054587 |
| chr6 | 108214497 | 108223045 |
| chr6 | 108323824 | 108402054 |
| chr6 | 108355653 | 108366332 |
| chr6 | 108355653 | 108447296 |
| chr6 | 108356689 | 108402054 |
| chr6 | 108476864 | 108477292 |
| chr6 | 108759417 | 108760403 |
| chr6 | 108854224 | 108876350 |
| chr6 | 108928087 | 108936999 |
| chr6 | 10893866  | 10898115  |
| chr6 | 10902676  | 10907684  |
| chr6 | 10907541  | 10912927  |
| chr6 | 109145218 | 109146937 |
| chr6 | 10931439  | 10956242  |
| chr6 | 10935057  | 10942746  |
| chr6 | 10935057  | 10956242  |
| chr6 | 109467652 | 109476930 |
| chr6 | 109475398 | 109476930 |
| chr6 | 10961304  | 10963843  |
| chr6 | 109656755 | 109672167 |
| chr6 | 109715077 | 109716568 |
| chr6 | 109715077 | 109735298 |
| chr6 | 109738324 | 109741544 |
| chr6 | 110101587 | 110127629 |
| chr6 | 110127468 | 110160732 |
| chr6 | 110207505 | 110226243 |
| chr6 | 110210706 | 110213160 |
| chr6 | 110217701 | 110219869 |
| chr6 | 110667433 | 110670541 |
| chr6 | 110667433 | 110746201 |
| chr6 | 110887504 | 110888983 |
| chr6 | 110887504 | 110890356 |
| chr6 | 110887504 | 110893065 |
| chr6 | 110960413 | 110962505 |
| chr6 | 110997182 | 111015856 |
| chr6 | 111172694 | 111177665 |
| chr6 | 111172694 | 111219042 |
| chr6 | 111177211 | 111219042 |
| chr6 | 111262256 | 111263946 |
| chr6 | 111343924 | 111368028 |
| chr6 | 111387764 | 111405630 |
| chr6 | 111387764 | 111416472 |

|      |           |           |
|------|-----------|-----------|
| chr6 | 111390085 | 111405630 |
| chr6 | 111405469 | 111472140 |
| chr6 | 111416282 | 111472140 |
| chr6 | 113945361 | 113953418 |
| chr6 | 113948978 | 113956151 |
| chr6 | 113948978 | 113956693 |
| chr6 | 113953276 | 113956151 |
| chr6 | 113956618 | 113960018 |
| chr6 | 116106243 | 116117945 |
| chr6 | 116645713 | 116660846 |
| chr6 | 116647458 | 116660846 |
| chr6 | 116651571 | 116658924 |
| chr6 | 116689319 | 116692156 |
| chr6 | 116689319 | 116692392 |
| chr6 | 116689319 | 116705160 |
| chr6 | 116689319 | 116716318 |
| chr6 | 116692054 | 116705160 |
| chr6 | 116692054 | 116726622 |
| chr6 | 116698703 | 116705160 |
| chr6 | 116698703 | 116716318 |
| chr6 | 116716218 | 116724375 |
| chr6 | 116716218 | 116732368 |
| chr6 | 117503766 | 117525434 |
| chr6 | 117503766 | 117539379 |
| chr6 | 117519815 | 117525434 |
| chr6 | 117532259 | 117539379 |
| chr6 | 117540667 | 117543211 |
| chr6 | 117566853 | 117569736 |
| chr6 | 117693041 | 117694180 |
| chr6 | 118479870 | 118483858 |
| chr6 | 118511297 | 118566316 |
| chr6 | 118523801 | 118566316 |
| chr6 | 118826146 | 118829250 |
| chr6 | 118826781 | 118856545 |
| chr6 | 121106022 | 121170527 |
| chr6 | 121126377 | 121170527 |
| chr6 | 121160009 | 121170527 |
| chr6 | 121205074 | 121242339 |
| chr6 | 121205074 | 121255410 |
| chr6 | 121205074 | 121256285 |
| chr6 | 121223235 | 121242339 |
| chr6 | 121223235 | 121255410 |
| chr6 | 121255327 | 121317672 |
| chr6 | 121279120 | 121294660 |
| chr6 | 121279120 | 121310847 |



|      |           |           |
|------|-----------|-----------|
| chr6 | 121279120 | 121317672 |
| chr6 | 121279120 | 121321794 |
| chr6 | 121292052 | 121299505 |
| chr6 | 12129758  | 12130942  |
| chr6 | 121303616 | 121310847 |
| chr6 | 121307975 | 121310847 |
| chr6 | 122413524 | 122423686 |
| chr6 | 123224092 | 123267751 |
| chr6 | 123252411 | 123267751 |
| chr6 | 123316456 | 123382147 |
| chr6 | 123331878 | 123382147 |
| chr6 | 123366134 | 123382147 |
| chr6 | 125009173 | 125058106 |
| chr6 | 125045210 | 125058106 |
| chr6 | 125045210 | 125076858 |
| chr6 | 125815290 | 125855240 |
| chr6 | 125874888 | 125878370 |
| chr6 | 125920942 | 125922834 |
| chr6 | 125993756 | 126021280 |
| chr6 | 126008391 | 126021280 |
| chr6 | 126011252 | 126013101 |
| chr6 | 126011252 | 126021280 |
| chr6 | 127285207 | 127286177 |
| chr6 | 127314815 | 127331030 |
| chr6 | 127327001 | 127331030 |
| chr6 | 127976922 | 127996988 |
| chr6 | 128005083 | 128067792 |
| chr6 | 128005083 | 128089992 |
| chr6 | 128064757 | 128067792 |
| chr6 | 128064757 | 128089992 |
| chr6 | 128078812 | 128089992 |
| chr6 | 128184431 | 128322310 |
| chr6 | 128218921 | 128242602 |
| chr6 | 128322038 | 128397688 |
| chr6 | 129491900 | 129492483 |
| chr6 | 129583987 | 129618852 |
| chr6 | 129611532 | 129618852 |
| chr6 | 129611532 | 129629522 |
| chr6 | 129611532 | 129638629 |
| chr6 | 129629352 | 129634105 |
| chr6 | 130022226 | 130042801 |
| chr6 | 130022226 | 130094367 |
| chr6 | 130078557 | 130104575 |
| chr6 | 130154824 | 130176008 |
| chr6 | 130154824 | 130184623 |

|      |           |           |
|------|-----------|-----------|
| chr6 | 130175840 | 130184623 |
| chr6 | 130175840 | 130222813 |
| chr6 | 130184102 | 130184623 |
| chr6 | 130863637 | 130867581 |
| chr6 | 130885095 | 130908863 |
| chr6 | 130890293 | 130908863 |
| chr6 | 130894343 | 130904540 |
| chr6 | 130899490 | 130908863 |
| chr6 | 130955104 | 130956499 |
| chr6 | 131145284 | 131169273 |
| chr6 | 131160058 | 131169273 |
| chr6 | 131160058 | 131199573 |
| chr6 | 131598286 | 131598761 |
| chr6 | 131598286 | 131608071 |
| chr6 | 131606478 | 131610246 |
| chr6 | 131618406 | 131621979 |
| chr6 | 131854925 | 131864571 |
| chr6 | 131884930 | 131886724 |
| chr6 | 132372607 | 132374777 |
| chr6 | 132469950 | 132472375 |
| chr6 | 132783932 | 132797121 |
| chr6 | 13316570  | 13321095  |
| chr6 | 13316570  | 13326906  |
| chr6 | 133982567 | 133984671 |
| chr6 | 134942408 | 134943966 |
| chr6 | 134986065 | 134993875 |
| chr6 | 134993757 | 135002842 |
| chr6 | 135002733 | 135042126 |
| chr6 | 135039572 | 135042126 |
| chr6 | 135039572 | 135050647 |
| chr6 | 135290422 | 135323324 |
| chr6 | 135300499 | 135323324 |
| chr6 | 135300499 | 135394896 |
| chr6 | 135318518 | 135358187 |
| chr6 | 135318518 | 135394896 |
| chr6 | 135318518 | 135428759 |
| chr6 | 135358131 | 135394896 |
| chr6 | 135358131 | 135411544 |
| chr6 | 135358131 | 135428759 |
| chr6 | 135358131 | 135442714 |
| chr6 | 135433026 | 135455926 |
| chr6 | 135433026 | 135457713 |
| chr6 | 135438374 | 135457713 |
| chr6 | 135442581 | 135457713 |
| chr6 | 135447007 | 135448475 |

|      |           |           |
|------|-----------|-----------|
| chr6 | 135453340 | 135455926 |
| chr6 | 135453340 | 135457713 |
| chr6 | 13579450  | 13584225  |
| chr6 | 13625652  | 13644729  |
| chr6 | 136267028 | 136282687 |
| chr6 | 136277864 | 136282687 |
| chr6 | 13632369  | 13644729  |
| chr6 | 13632369  | 13658832  |
| chr6 | 13637807  | 13658832  |
| chr6 | 136388392 | 136389517 |
| chr6 | 13639562  | 13644729  |
| chr6 | 13639562  | 13657276  |
| chr6 | 13639562  | 13658832  |
| chr6 | 13641198  | 13644729  |
| chr6 | 13652658  | 13658832  |
| chr6 | 13652658  | 13696896  |
| chr6 | 136561532 | 136567874 |
| chr6 | 13657108  | 13658832  |
| chr6 | 136592172 | 136592614 |
| chr6 | 136601021 | 136622981 |
| chr6 | 136637324 | 136642569 |
| chr6 | 136637324 | 136698682 |
| chr6 | 136669282 | 136698682 |
| chr6 | 136694139 | 136697387 |
| chr6 | 136694139 | 136698682 |
| chr6 | 136694139 | 136705133 |
| chr6 | 136694139 | 136720589 |
| chr6 | 136825213 | 136870003 |
| chr6 | 136866626 | 136872253 |
| chr6 | 137875687 | 137877256 |
| chr6 | 13793893  | 13807044  |
| chr6 | 13798832  | 13807044  |
| chr6 | 138207041 | 138210041 |
| chr6 | 138207041 | 138229852 |
| chr6 | 138229783 | 138245591 |
| chr6 | 138441982 | 138447193 |
| chr6 | 138473305 | 138496371 |
| chr6 | 138907494 | 138914761 |
| chr6 | 138907494 | 138917627 |
| chr6 | 138907494 | 138941489 |
| chr6 | 138911275 | 138930098 |
| chr6 | 138926400 | 138941489 |
| chr6 | 138926400 | 138947913 |
| chr6 | 138941334 | 138945697 |
| chr6 | 138941334 | 138947913 |

|      |           |           |
|------|-----------|-----------|
| chr6 | 138943512 | 138944622 |
| chr6 | 138943512 | 138947913 |
| chr6 | 138944497 | 138947913 |
| chr6 | 142166227 | 142170421 |
| chr6 | 142166227 | 142189534 |
| chr6 | 142189425 | 142204065 |
| chr6 | 142198438 | 142204065 |
| chr6 | 142390257 | 142420104 |
| chr6 | 142759771 | 142837047 |
| chr6 | 143060946 | 143284225 |
| chr6 | 143165081 | 143284225 |
| chr6 | 143470960 | 143474856 |
| chr6 | 143748984 | 143753912 |
| chr6 | 143748984 | 143777383 |
| chr6 | 143765260 | 143777383 |
| chr6 | 143765260 | 143788910 |
| chr6 | 143765260 | 143807133 |
| chr6 | 143772257 | 143774215 |
| chr6 | 143772257 | 143777383 |
| chr6 | 143844485 | 143846224 |
| chr6 | 143844485 | 143850218 |
| chr6 | 143850130 | 143858007 |
| chr6 | 143960468 | 143985174 |
| chr6 | 144421877 | 144429741 |
| chr6 | 144426286 | 144429741 |
| chr6 | 144451369 | 144459354 |
| chr6 | 144451369 | 144474759 |
| chr6 | 144458769 | 144462866 |
| chr6 | 144473719 | 144474759 |
| chr6 | 144482208 | 144488834 |
| chr6 | 144487547 | 144493456 |
| chr6 | 144490070 | 144493456 |
| chr6 | 144513908 | 144514820 |
| chr6 | 144521979 | 144523188 |
| chr6 | 144531051 | 144539443 |
| chr6 | 144531051 | 144557311 |
| chr6 | 144531051 | 144577288 |
| chr6 | 144537581 | 144539443 |
| chr6 | 144537581 | 144542870 |
| chr6 | 144537581 | 144557311 |
| chr6 | 144577098 | 144757989 |
| chr6 | 144678405 | 144757989 |
| chr6 | 144700086 | 144730486 |
| chr6 | 144730356 | 144757989 |
| chr6 | 144748245 | 144774364 |

|      |           |           |
|------|-----------|-----------|
| chr6 | 144748245 | 144782123 |
| chr6 | 144781921 | 144793991 |
| chr6 | 144781921 | 144803147 |
| chr6 | 144793833 | 144821018 |
| chr6 | 144820881 | 144836541 |
| chr6 | 145888019 | 145894977 |
| chr6 | 145893214 | 145894977 |
| chr6 | 145919347 | 145933178 |
| chr6 | 147205970 | 147239270 |
| chr6 | 147205970 | 147278204 |
| chr6 | 147205970 | 147291172 |
| chr6 | 147205970 | 147334222 |
| chr6 | 147260614 | 147291172 |
| chr6 | 147260614 | 147316407 |
| chr6 | 147310083 | 147339238 |
| chr6 | 147314263 | 147316407 |
| chr6 | 147314263 | 147334222 |
| chr6 | 147315514 | 147334222 |
| chr6 | 148440183 | 148487715 |
| chr6 | 148468544 | 148487715 |
| chr6 | 148886985 | 148964563 |
| chr6 | 148941278 | 148964563 |
| chr6 | 149019138 | 149021481 |
| chr6 | 149342684 | 149370099 |
| chr6 | 149342684 | 149379518 |
| chr6 | 149512154 | 149517450 |
| chr6 | 149512154 | 149526776 |
| chr6 | 149512154 | 149541586 |
| chr6 | 149521059 | 149541586 |
| chr6 | 149525142 | 149534774 |
| chr6 | 149533457 | 149535738 |
| chr6 | 149533457 | 149541586 |
| chr6 | 149540941 | 149541586 |
| chr6 | 149572284 | 149582603 |
| chr6 | 149579833 | 149582603 |
| chr6 | 149597062 | 149598350 |
| chr6 | 149601593 | 149604782 |
| chr6 | 149603267 | 149604782 |
| chr6 | 149623102 | 149632916 |
| chr6 | 149623102 | 149638560 |
| chr6 | 149632758 | 149638560 |
| chr6 | 149676259 | 149676737 |
| chr6 | 149676259 | 149680457 |
| chr6 | 149676259 | 149684592 |
| chr6 | 149683078 | 149695221 |

|      |           |           |
|------|-----------|-----------|
| chr6 | 149695073 | 149702266 |
| chr6 | 149731612 | 149736622 |
| chr6 | 149736470 | 149738778 |
| chr6 | 149738642 | 149742570 |
| chr6 | 149738642 | 149743715 |
| chr6 | 149742389 | 149743715 |
| chr6 | 149771161 | 149793669 |
| chr6 | 149771161 | 149796500 |
| chr6 | 149771161 | 149802416 |
| chr6 | 149789953 | 149796500 |
| chr6 | 149826263 | 149853160 |
| chr6 | 149836084 | 149853160 |
| chr6 | 150876089 | 150882886 |
| chr6 | 150876089 | 150887981 |
| chr6 | 150876089 | 151013820 |
| chr6 | 150877633 | 150885734 |
| chr6 | 150877633 | 150887981 |
| chr6 | 150882761 | 150887981 |
| chr6 | 150905649 | 150926295 |
| chr6 | 150905649 | 150965037 |
| chr6 | 150918576 | 150972058 |
| chr6 | 150926121 | 150938745 |
| chr6 | 150926121 | 150956071 |
| chr6 | 150936803 | 150972058 |
| chr6 | 150944485 | 150965037 |
| chr6 | 150949030 | 150972058 |
| chr6 | 150955994 | 150965037 |
| chr6 | 150955994 | 150972058 |
| chr6 | 151009818 | 151015693 |
| chr6 | 151009818 | 151037117 |
| chr6 | 151014879 | 151015693 |
| chr6 | 151034492 | 151037117 |
| chr6 | 151417278 | 151427582 |
| chr6 | 15374116  | 15410365  |
| chr6 | 15374116  | 15452175  |
| chr6 | 15374116  | 15468718  |
| chr6 | 15410223  | 15468718  |
| chr6 | 154410342 | 154450258 |
| chr6 | 154422505 | 154422983 |
| chr6 | 154422505 | 154442290 |
| chr6 | 154428127 | 154450258 |
| chr6 | 154441291 | 154442290 |
| chr6 | 154441291 | 154450258 |
| chr6 | 154773988 | 154792976 |
| chr6 | 154773988 | 154795139 |

|      |           |           |
|------|-----------|-----------|
| chr6 | 154778000 | 154805486 |
| chr6 | 154787860 | 154792976 |
| chr6 | 154787860 | 154795139 |
| chr6 | 154787860 | 154805486 |
| chr6 | 154787860 | 154810208 |
| chr6 | 154805368 | 154810208 |
| chr6 | 154808069 | 154810208 |
| chr6 | 154808069 | 154818592 |
| chr6 | 154815715 | 154820333 |
| chr6 | 154818478 | 154827240 |
| chr6 | 15507135  | 15508454  |
| chr6 | 155296952 | 155311339 |
| chr6 | 15533239  | 15615399  |
| chr6 | 15533239  | 15637804  |
| chr6 | 15593058  | 15637804  |
| chr6 | 15615266  | 15627475  |
| chr6 | 15615266  | 15637804  |
| chr6 | 15627342  | 15637804  |
| chr6 | 156829226 | 156901525 |
| chr6 | 156829226 | 156935576 |
| chr6 | 157084661 | 157110561 |
| chr6 | 157084661 | 157133207 |
| chr6 | 157110471 | 157133207 |
| chr6 | 157110471 | 157167185 |
| chr6 | 157167039 | 157190210 |
| chr6 | 157628348 | 157653627 |
| chr6 | 157647258 | 157653627 |
| chr6 | 157867546 | 157875176 |
| chr6 | 157896826 | 157906212 |
| chr6 | 157896826 | 157910025 |
| chr6 | 157921530 | 157932272 |
| chr6 | 158017203 | 158033680 |
| chr6 | 158074579 | 158078281 |
| chr6 | 158081108 | 158081510 |
| chr6 | 158114788 | 158120575 |
| chr6 | 158119028 | 158128270 |
| chr6 | 158143055 | 158155351 |
| chr6 | 158146781 | 158158364 |
| chr6 | 158413064 | 158461729 |
| chr6 | 158429735 | 158452268 |
| chr6 | 158429735 | 158461729 |
| chr6 | 158448995 | 158452268 |
| chr6 | 158448995 | 158461729 |
| chr6 | 158448995 | 158481289 |
| chr6 | 158481054 | 158489732 |

|      |           |           |
|------|-----------|-----------|
| chr6 | 158573419 | 158589782 |
| chr6 | 158573419 | 158605347 |
| chr6 | 158573419 | 158607343 |
| chr6 | 158573419 | 158608750 |
| chr6 | 158573419 | 158625754 |
| chr6 | 158573419 | 158631389 |
| chr6 | 158580939 | 158589782 |
| chr6 | 158583953 | 158585425 |
| chr6 | 158583953 | 158589782 |
| chr6 | 158583953 | 158608750 |
| chr6 | 158589671 | 158608750 |
| chr6 | 158605266 | 158608750 |
| chr6 | 158637127 | 158641360 |
| chr6 | 158776407 | 158789371 |
| chr6 | 158783519 | 158787203 |
| chr6 | 158783519 | 158789371 |
| chr6 | 158980773 | 158983807 |
| chr6 | 158980773 | 158986421 |
| chr6 | 159682473 | 159688242 |
| chr6 | 159736257 | 159743792 |
| chr6 | 159736257 | 159748369 |
| chr6 | 159775169 | 159777456 |
| chr6 | 159780442 | 159781110 |
| chr6 | 159783940 | 159785997 |
| chr6 | 159783940 | 159788143 |
| chr6 | 159784665 | 159785496 |
| chr6 | 159784665 | 159785997 |
| chr6 | 159991183 | 160010785 |
| chr6 | 159991183 | 160027314 |
| chr6 | 160040559 | 160050652 |
| chr6 | 160046497 | 160048543 |
| chr6 | 160058905 | 160063630 |
| chr6 | 161034258 | 161049979 |
| chr6 | 161102698 | 161111958 |
| chr6 | 16485971  | 16753347  |
| chr6 | 16522626  | 16657901  |
| chr6 | 16585779  | 16657901  |
| chr6 | 16585779  | 16753347  |
| chr6 | 166328275 | 166330247 |
| chr6 | 16657775  | 16753347  |
| chr6 | 16657775  | 16754091  |
| chr6 | 166934090 | 166952548 |
| chr6 | 167010812 | 167033971 |
| chr6 | 167022408 | 167024894 |
| chr6 | 167022408 | 167026615 |



|      |           |           |
|------|-----------|-----------|
| chr6 | 167022408 | 167033971 |
| chr6 | 167864550 | 167880517 |
| chr6 | 167864550 | 167898467 |
| chr6 | 167864550 | 167907289 |
| chr6 | 167870382 | 167880517 |
| chr6 | 167870382 | 167889326 |
| chr6 | 167870382 | 167891029 |
| chr6 | 167870382 | 167898467 |
| chr6 | 167870385 | 167880517 |
| chr6 | 167870385 | 167902386 |
| chr6 | 167890861 | 167902386 |
| chr6 | 167898204 | 167962567 |
| chr6 | 169582835 | 169602321 |
| chr6 | 169582835 | 169613656 |
| chr6 | 169582835 | 169649275 |
| chr6 | 169582835 | 169662424 |
| chr6 | 169602218 | 169652008 |
| chr6 | 169613558 | 169634525 |
| chr6 | 169632946 | 169638660 |
| chr6 | 169632946 | 169652008 |
| chr6 | 169658275 | 169662424 |
| chr6 | 169705132 | 169721111 |
| chr6 | 169710235 | 169721111 |
| chr6 | 169756718 | 169776673 |
| chr6 | 169758967 | 169762531 |
| chr6 | 169759837 | 169768171 |
| chr6 | 169762428 | 169768171 |
| chr6 | 170323078 | 170358318 |
| chr6 | 170348150 | 170358318 |
| chr6 | 170388286 | 170395579 |
| chr6 | 170388286 | 170404601 |
| chr6 | 170537233 | 170549113 |
| chr6 | 170543600 | 170549113 |
| chr6 | 1726415   | 1742586   |
| chr6 | 17421554  | 17426690  |
| chr6 | 17421554  | 17513954  |
| chr6 | 17462995  | 17507726  |
| chr6 | 17462995  | 17513954  |
| chr6 | 17507168  | 17507726  |
| chr6 | 17507168  | 17513954  |
| chr6 | 17539268  | 17543143  |
| chr6 | 17540972  | 17543143  |
| chr6 | 17624560  | 17649300  |
| chr6 | 17632649  | 17640064  |
| chr6 | 17637152  | 17646154  |

|      |          |          |
|------|----------|----------|
| chr6 | 17639938 | 17649300 |
| chr6 | 17639938 | 17675033 |
| chr6 | 17646066 | 17649300 |
| chr6 | 17647806 | 17649300 |
| chr6 | 17649162 | 17665385 |
| chr6 | 17661652 | 17665385 |
| chr6 | 17661652 | 17669028 |
| chr6 | 17661652 | 17669546 |
| chr6 | 17661652 | 17675033 |
| chr6 | 17661652 | 17675770 |
| chr6 | 17665238 | 17669028 |
| chr6 | 17665238 | 17669546 |
| chr6 | 17665238 | 17675770 |
| chr6 | 17669292 | 17675033 |
| chr6 | 17674904 | 17675770 |
| chr6 | 17674904 | 17688618 |
| chr6 | 17675228 | 17675770 |
| chr6 | 17771907 | 17779099 |
| chr6 | 17775014 | 17779099 |
| chr6 | 17783645 | 17796820 |
| chr6 | 17794248 | 17794704 |
| chr6 | 17825767 | 17834071 |
| chr6 | 17833960 | 17837583 |
| chr6 | 17836877 | 17856122 |
| chr6 | 17855436 | 17873437 |
| chr6 | 18147822 | 18149171 |
| chr6 | 18159882 | 18162924 |
| chr6 | 18159882 | 18166378 |
| chr6 | 18161326 | 18162924 |
| chr6 | 18185771 | 18217885 |
| chr6 | 18207397 | 18217885 |
| chr6 | 18212487 | 18213781 |
| chr6 | 18212487 | 18217885 |
| chr6 | 18213655 | 18217885 |
| chr6 | 18215006 | 18217885 |
| chr6 | 18236451 | 18237516 |
| chr6 | 18236451 | 18249839 |
| chr6 | 18255730 | 18258405 |
| chr6 | 18255730 | 18263996 |
| chr6 | 18256360 | 18258405 |
| chr6 | 1959866  | 1960966  |
| chr6 | 1959866  | 2117556  |
| chr6 | 20112875 | 20144315 |
| chr6 | 20144219 | 20152769 |
| chr6 | 20535350 | 20548705 |

|      |          |          |
|------|----------|----------|
| chr6 | 20546345 | 20548705 |
| chr6 | 20649292 | 20781265 |
| chr6 | 20781144 | 20846178 |
| chr6 | 20781144 | 20955585 |
| chr6 | 21108400 | 21201274 |
| chr6 | 2115770  | 2117556  |
| chr6 | 2115770  | 2124731  |
| chr6 | 24405167 | 24409573 |
| chr6 | 24405167 | 24412395 |
| chr6 | 24405167 | 24418578 |
| chr6 | 24408407 | 24415163 |
| chr6 | 24412221 | 24416513 |
| chr6 | 24416396 | 24418578 |
| chr6 | 24445545 | 24445831 |
| chr6 | 24456497 | 24472636 |
| chr6 | 24475120 | 24479959 |
| chr6 | 24502522 | 24504985 |
| chr6 | 24502522 | 24515310 |
| chr6 | 24502522 | 24522925 |
| chr6 | 24578109 | 24583702 |
| chr6 | 24658560 | 24666611 |
| chr6 | 24777221 | 24781621 |
| chr6 | 25449897 | 25472521 |
| chr6 | 25465872 | 25495215 |
| chr6 | 25482256 | 25500235 |
| chr6 | 25509655 | 25520337 |
| chr6 | 25515674 | 25520337 |
| chr6 | 25515674 | 25528893 |
| chr6 | 25550909 | 25556850 |
| chr6 | 25580923 | 25581439 |
| chr6 | 25966334 | 25969420 |
| chr6 | 26385014 | 26388294 |
| chr6 | 26426241 | 26428785 |
| chr6 | 2768690  | 2779492  |
| chr6 | 2768690  | 2783561  |
| chr6 | 2779262  | 2783561  |
| chr6 | 2779262  | 2784403  |
| chr6 | 28271853 | 28272787 |
| chr6 | 2836107  | 2840594  |
| chr6 | 2954591  | 2959342  |
| chr6 | 29604493 | 29605696 |
| chr6 | 29621100 | 29622205 |
| chr6 | 29621100 | 29624024 |
| chr6 | 29889327 | 29890485 |
| chr6 | 30034907 | 30035983 |

|      |          |          |
|------|----------|----------|
| chr6 | 30061514 | 30062333 |
| chr6 | 3006467  | 3012674  |
| chr6 | 3006467  | 3016985  |
| chr6 | 30196515 | 30204765 |
| chr6 | 30328888 | 30330876 |
| chr6 | 30585878 | 30589720 |
| chr6 | 30608778 | 30609955 |
| chr6 | 30619492 | 30619989 |
| chr6 | 30627459 | 30628430 |
| chr6 | 30627459 | 30642247 |
| chr6 | 30627459 | 30643011 |
| chr6 | 30627850 | 30628430 |
| chr6 | 30649557 | 30651466 |
| chr6 | 30650993 | 30651466 |
| chr6 | 30670409 | 30671274 |
| chr6 | 30730021 | 30731100 |
| chr6 | 30888687 | 30889430 |
| chr6 | 31148404 | 31148728 |
| chr6 | 31410542 | 31412460 |
| chr6 | 31507021 | 31507531 |
| chr6 | 31623731 | 31626162 |
| chr6 | 31647590 | 31649627 |
| chr6 | 31648676 | 31649627 |
| chr6 | 31741162 | 31747432 |
| chr6 | 31742876 | 31744581 |
| chr6 | 31742876 | 31753629 |
| chr6 | 31743903 | 31744581 |
| chr6 | 31743903 | 31753629 |
| chr6 | 31772953 | 31773437 |
| chr6 | 31784213 | 31785733 |
| chr6 | 31835410 | 31837435 |
| chr6 | 31892406 | 31892910 |
| chr6 | 31961040 | 31961386 |
| chr6 | 31968327 | 31968796 |
| chr6 | 32118955 | 32120902 |
| chr6 | 32120770 | 32121348 |
| chr6 | 32120770 | 32126252 |
| chr6 | 32126116 | 32127750 |
| chr6 | 32127102 | 32127750 |
| chr6 | 32154586 | 32162622 |
| chr6 | 32170424 | 32171070 |
| chr6 | 32835153 | 32835773 |
| chr6 | 3283851  | 3298218  |
| chr6 | 32974461 | 32975112 |
| chr6 | 32974461 | 32980464 |

|      |          |          |
|------|----------|----------|
| chr6 | 32975383 | 32976169 |
| chr6 | 33266556 | 33270283 |
| chr6 | 33267681 | 33269557 |
| chr6 | 33272627 | 33276066 |
| chr6 | 33294687 | 33295045 |
| chr6 | 33303954 | 33304638 |
| chr6 | 33320010 | 33321567 |
| chr6 | 33398028 | 33398387 |
| chr6 | 33403313 | 33406665 |
| chr6 | 33403728 | 33406875 |
| chr6 | 33406195 | 33406875 |
| chr6 | 33432160 | 33432806 |
| chr6 | 335113   | 348841   |
| chr6 | 33688655 | 33690198 |
| chr6 | 33690916 | 33691719 |
| chr6 | 33690916 | 33691928 |
| chr6 | 33776953 | 33786774 |
| chr6 | 3410187  | 3415855  |
| chr6 | 34237203 | 34243518 |
| chr6 | 34240736 | 34242795 |
| chr6 | 34240736 | 34243518 |
| chr6 | 345853   | 348841   |
| chr6 | 34606554 | 34646798 |
| chr6 | 34606554 | 34654779 |
| chr6 | 34646600 | 34654779 |
| chr6 | 34762594 | 34770395 |
| chr6 | 34821652 | 34821955 |
| chr6 | 34821652 | 34823348 |
| chr6 | 34821652 | 34834861 |
| chr6 | 34823256 | 34835464 |
| chr6 | 34834216 | 34834861 |
| chr6 | 34834216 | 34836348 |
| chr6 | 34867224 | 34867616 |
| chr6 | 34967238 | 34985278 |
| chr6 | 34981689 | 34983425 |
| chr6 | 34981689 | 34994422 |
| chr6 | 34994301 | 35018059 |
| chr6 | 35312301 | 35312772 |
| chr6 | 35410986 | 35421958 |
| chr6 | 35420126 | 35421958 |
| chr6 | 35421819 | 35424779 |
| chr6 | 35587033 | 35620274 |
| chr6 | 35587033 | 35637158 |
| chr6 | 35597247 | 35620274 |
| chr6 | 35597247 | 35637158 |

|      |          |          |
|------|----------|----------|
| chr6 | 35597247 | 35642843 |
| chr6 | 35619095 | 35620274 |
| chr6 | 35619095 | 35637158 |
| chr6 | 35619095 | 35642843 |
| chr6 | 35637013 | 35642843 |
| chr6 | 35857260 | 35869901 |
| chr6 | 35857260 | 35870959 |
| chr6 | 35857260 | 35872728 |
| chr6 | 35869009 | 35869901 |
| chr6 | 35874232 | 35891013 |
| chr6 | 35888023 | 35891041 |
| chr6 | 36052698 | 36059347 |
| chr6 | 36072872 | 36102649 |
| chr6 | 36213879 | 36218010 |
| chr6 | 36222167 | 36229056 |
| chr6 | 36474788 | 36481759 |
| chr6 | 36496710 | 36499990 |
| chr6 | 36496710 | 36507602 |
| chr6 | 36496710 | 36525642 |
| chr6 | 36506582 | 36525642 |
| chr6 | 36515337 | 36517840 |
| chr6 | 36515337 | 36540207 |
| chr6 | 36524340 | 36540204 |
| chr6 | 36524340 | 36540207 |
| chr6 | 36894503 | 36902434 |
| chr6 | 36894503 | 36914693 |
| chr6 | 36899425 | 36902434 |
| chr6 | 36899425 | 36916574 |
| chr6 | 36899425 | 36919701 |
| chr6 | 37279303 | 37284464 |
| chr6 | 37279303 | 37287072 |
| chr6 | 37279303 | 37291357 |
| chr6 | 37312917 | 37317206 |
| chr6 | 3737078  | 3738148  |
| chr6 | 37371511 | 37381354 |
| chr6 | 37374619 | 37381354 |
| chr6 | 37443998 | 37446449 |
| chr6 | 37443998 | 37479255 |
| chr6 | 37458611 | 37463008 |
| chr6 | 37929958 | 38082457 |
| chr6 | 37929958 | 38116739 |
| chr6 | 38061592 | 38082457 |
| chr6 | 38082391 | 38116739 |
| chr6 | 38256408 | 38288461 |
| chr6 | 38577599 | 38580437 |

|      |          |          |
|------|----------|----------|
| chr6 | 38577599 | 38598121 |
| chr6 | 38577599 | 38613033 |
| chr6 | 38592575 | 38598121 |
| chr6 | 4042486  | 4044023  |
| chr6 | 41079028 | 41084192 |
| chr6 | 41090203 | 41093085 |
| chr6 | 4117307  | 4119275  |
| chr6 | 4117307  | 4133701  |
| chr6 | 4125249  | 4126237  |
| chr6 | 4125249  | 4127831  |
| chr6 | 41565744 | 41578081 |
| chr6 | 41771815 | 41778176 |
| chr6 | 41798723 | 41871637 |
| chr6 | 41871563 | 41891875 |
| chr6 | 42051356 | 42068607 |
| chr6 | 42055530 | 42057513 |
| chr6 | 42055530 | 42068607 |
| chr6 | 42066311 | 42068607 |
| chr6 | 42259338 | 42263568 |
| chr6 | 42573733 | 42592229 |
| chr6 | 42573733 | 42594304 |
| chr6 | 42592150 | 42594304 |
| chr6 | 42592150 | 42606651 |
| chr6 | 42592150 | 42612291 |
| chr6 | 42603587 | 42605859 |
| chr6 | 42603587 | 42606651 |
| chr6 | 42603587 | 42612291 |
| chr6 | 42603587 | 42615178 |
| chr6 | 42603587 | 42637194 |
| chr6 | 42603587 | 42642481 |
| chr6 | 42606588 | 42635546 |
| chr6 | 42612170 | 42617507 |
| chr6 | 42612170 | 42632904 |
| chr6 | 42615070 | 42617507 |
| chr6 | 42615070 | 42632904 |
| chr6 | 42616001 | 42632904 |
| chr6 | 42616001 | 42644336 |
| chr6 | 42632551 | 42632904 |
| chr6 | 42632551 | 42637194 |
| chr6 | 42637010 | 42642481 |
| chr6 | 42637010 | 42666245 |
| chr6 | 42644213 | 42648170 |
| chr6 | 42650283 | 42652645 |
| chr6 | 42650283 | 42658824 |
| chr6 | 42658023 | 42666245 |

|      |          |          |
|------|----------|----------|
| chr6 | 42659655 | 42670715 |
| chr6 | 42662183 | 42666245 |
| chr6 | 42663257 | 42666245 |
| chr6 | 42665408 | 42670240 |
| chr6 | 42673790 | 42679832 |
| chr6 | 42676055 | 42679832 |
| chr6 | 42676055 | 42684871 |
| chr6 | 42678538 | 42679832 |
| chr6 | 42678538 | 42684871 |
| chr6 | 42822795 | 42830172 |
| chr6 | 42822795 | 42855917 |
| chr6 | 42855855 | 42862612 |
| chr6 | 42934474 | 42935670 |
| chr6 | 42934474 | 42938207 |
| chr6 | 42966043 | 42966447 |
| chr6 | 42967367 | 42969987 |
| chr6 | 42968289 | 42969987 |
| chr6 | 42974002 | 42975038 |
| chr6 | 43012925 | 43013389 |
| chr6 | 43024984 | 43026141 |
| chr6 | 43024984 | 43027477 |
| chr6 | 43026036 | 43027477 |
| chr6 | 43055544 | 43056445 |
| chr6 | 43055896 | 43056445 |
| chr6 | 43056080 | 43056445 |
| chr6 | 43138848 | 43139525 |
| chr6 | 43141930 | 43144606 |
| chr6 | 43175705 | 43176667 |
| chr6 | 43196068 | 43196862 |
| chr6 | 43206006 | 43206510 |
| chr6 | 43226032 | 43226395 |
| chr6 | 43432141 | 43438795 |
| chr6 | 43436137 | 43438795 |
| chr6 | 43478086 | 43503508 |
| chr6 | 43478086 | 43503706 |
| chr6 | 43497880 | 43503706 |
| chr6 | 43498922 | 43503706 |
| chr6 | 43502282 | 43503706 |
| chr6 | 43520065 | 43521048 |
| chr6 | 43524470 | 43525214 |
| chr6 | 43524470 | 43526747 |
| chr6 | 43525838 | 43528205 |
| chr6 | 43527633 | 43531575 |
| chr6 | 43527633 | 43534007 |
| chr6 | 43527633 | 43555964 |



|      |          |          |
|------|----------|----------|
| chr6 | 43527633 | 43567354 |
| chr6 | 43531478 | 43549578 |
| chr6 | 43533906 | 43548460 |
| chr6 | 43533906 | 43551453 |
| chr6 | 43533906 | 43553503 |
| chr6 | 43546570 | 43548460 |
| chr6 | 43546570 | 43553503 |
| chr6 | 43546570 | 43555964 |
| chr6 | 43546570 | 43573601 |
| chr6 | 43549488 | 43567354 |
| chr6 | 43549488 | 43572578 |
| chr6 | 43553372 | 43567354 |
| chr6 | 43555835 | 43558591 |
| chr6 | 43555835 | 43567354 |
| chr6 | 43555835 | 43568737 |
| chr6 | 43555835 | 43570994 |
| chr6 | 43555835 | 43572578 |
| chr6 | 43555835 | 43573601 |
| chr6 | 43560177 | 43567354 |
| chr6 | 43560177 | 43573601 |
| chr6 | 43562246 | 43567354 |
| chr6 | 43562246 | 43573601 |
| chr6 | 43565659 | 43567354 |
| chr6 | 43565659 | 43573601 |
| chr6 | 43568710 | 43573601 |
| chr6 | 43570501 | 43570994 |
| chr6 | 43570501 | 43573601 |
| chr6 | 43570856 | 43573601 |
| chr6 | 43572505 | 43573601 |
| chr6 | 43582315 | 43583141 |
| chr6 | 43582315 | 43587489 |
| chr6 | 43582315 | 43610723 |
| chr6 | 43587271 | 43597865 |
| chr6 | 43587271 | 43601091 |
| chr6 | 43587271 | 43605319 |
| chr6 | 43587271 | 43610723 |
| chr6 | 43597695 | 43601091 |
| chr6 | 43604614 | 43605319 |
| chr6 | 43774340 | 43778918 |
| chr6 | 44134560 | 44141098 |
| chr6 | 44138479 | 44141098 |
| chr6 | 44139466 | 44139759 |
| chr6 | 44227262 | 44232428 |
| chr6 | 44227262 | 44233006 |
| chr6 | 44250020 | 44250599 |

|      |          |          |
|------|----------|----------|
| chr6 | 44251047 | 44252267 |
| chr6 | 44390267 | 44393573 |
| chr6 | 44403808 | 44406467 |
| chr6 | 44403808 | 44408632 |
| chr6 | 44419448 | 44429910 |
| chr6 | 44932652 | 44954607 |
| chr6 | 44932652 | 45014891 |
| chr6 | 44932652 | 45020632 |
| chr6 | 44932652 | 45365301 |
| chr6 | 45003652 | 45020632 |
| chr6 | 45003652 | 45106006 |
| chr6 | 45003652 | 45365301 |
| chr6 | 45105921 | 45365301 |
| chr6 | 45422592 | 45438051 |
| chr6 | 45422592 | 45492114 |
| chr6 | 45422592 | 45512407 |
| chr6 | 45431862 | 45438051 |
| chr6 | 45431862 | 45512407 |
| chr6 | 45491940 | 45512407 |
| chr6 | 46655842 | 46671228 |
| chr6 | 47283937 | 47286595 |
| chr6 | 47503279 | 47533755 |
| chr6 | 47503279 | 47554766 |
| chr6 | 47533601 | 47544706 |
| chr6 | 47533601 | 47554766 |
| chr6 | 47544605 | 47554766 |
| chr6 | 47554645 | 47596026 |
| chr6 | 47574063 | 47582065 |
| chr6 | 47576523 | 47599443 |
| chr6 | 47576523 | 47609304 |
| chr6 | 47580863 | 47612536 |
| chr6 | 47595860 | 47606277 |
| chr6 | 488978   | 499700   |
| chr6 | 4935514  | 4937737  |
| chr6 | 4999808  | 5002245  |
| chr6 | 52267864 | 52269226 |
| chr6 | 52267864 | 52273916 |
| chr6 | 52267864 | 52277688 |
| chr6 | 52267864 | 52283406 |
| chr6 | 52272300 | 52273916 |
| chr6 | 52276267 | 52277198 |
| chr6 | 52278741 | 52283406 |
| chr6 | 52279360 | 52282861 |
| chr6 | 52282652 | 52283406 |
| chr6 | 52423686 | 52454287 |

|      |          |          |
|------|----------|----------|
| chr6 | 52423686 | 52465115 |
| chr6 | 52423686 | 52469473 |
| chr6 | 52423686 | 52479787 |
| chr6 | 52423945 | 52454287 |
| chr6 | 52423945 | 52465115 |
| chr6 | 52469332 | 52479787 |
| chr6 | 52504590 | 52509586 |
| chr6 | 52504590 | 52516737 |
| chr6 | 52507552 | 52516737 |
| chr6 | 52509527 | 52516737 |
| chr6 | 52516005 | 52516737 |
| chr6 | 53071056 | 53076543 |
| chr6 | 53071056 | 53082618 |
| chr6 | 53073480 | 53092547 |
| chr6 | 53076485 | 53081098 |
| chr6 | 53076485 | 53092824 |
| chr6 | 532468   | 576882   |
| chr6 | 53270592 | 53291963 |
| chr6 | 53273219 | 53276256 |
| chr6 | 53273219 | 53287942 |
| chr6 | 53273219 | 53291963 |
| chr6 | 53273219 | 53295707 |
| chr6 | 53275089 | 53291963 |
| chr6 | 53275089 | 53295707 |
| chr6 | 53514203 | 53522527 |
| chr6 | 53520777 | 53522527 |
| chr6 | 5368549  | 5431172  |
| chr6 | 5368549  | 5545340  |
| chr6 | 53842109 | 53882976 |
| chr6 | 53878992 | 53897359 |
| chr6 | 53882886 | 53899891 |
| chr6 | 53896497 | 53904462 |
| chr6 | 53896497 | 53913969 |
| chr6 | 5404541  | 5431172  |
| chr6 | 56463564 | 56466195 |
| chr6 | 56466077 | 56472222 |
| chr6 | 56471105 | 56482877 |
| chr6 | 56492933 | 56504098 |
| chr6 | 56508528 | 56517620 |
| chr6 | 56515449 | 56517620 |
| chr6 | 56562137 | 56600221 |
| chr6 | 56572099 | 56600221 |
| chr6 | 56592181 | 56598006 |
| chr6 | 56624529 | 56640057 |
| chr6 | 56629249 | 56634258 |

|      |          |          |
|------|----------|----------|
| chr6 | 56631210 | 56636652 |
| chr6 | 56670640 | 56704369 |
| chr6 | 56670640 | 56735289 |
| chr6 | 56699652 | 56704369 |
| chr6 | 56699652 | 56735289 |
| chr6 | 56851396 | 56900621 |
| chr6 | 56981710 | 56992555 |
| chr6 | 56992377 | 57015353 |
| chr6 | 57124733 | 57128840 |
| chr6 | 57124733 | 57133192 |
| chr6 | 57124733 | 57134870 |
| chr6 | 57124733 | 57142095 |
| chr6 | 57124733 | 57150862 |
| chr6 | 57124733 | 57161152 |
| chr6 | 57128728 | 57134870 |
| chr6 | 57133041 | 57148693 |
| chr6 | 57141301 | 57142095 |
| chr6 | 57150718 | 57161152 |
| chr6 | 57152220 | 57161152 |
| chr6 | 57193841 | 57196606 |
| chr6 | 57193841 | 57210445 |
| chr6 | 57207627 | 57210445 |
| chr6 | 572519   | 576882   |
| chr6 | 572519   | 599225   |
| chr6 | 57318436 | 57326045 |
| chr6 | 57324200 | 57326045 |
| chr6 | 57379900 | 57382168 |
| chr6 | 57379900 | 57507454 |
| chr6 | 57379900 | 57537625 |
| chr6 | 57507386 | 57537625 |
| chr6 | 57507386 | 57606457 |
| chr6 | 57532410 | 57537625 |
| chr6 | 57532410 | 57606457 |
| chr6 | 57601092 | 57606457 |
| chr6 | 576756   | 599225   |
| chr6 | 576756   | 610178   |
| chr6 | 57924416 | 57930291 |
| chr6 | 57926425 | 57930291 |
| chr6 | 592468   | 599225   |
| chr6 | 592468   | 610178   |
| chr6 | 592468   | 619543   |
| chr6 | 598020   | 617835   |
| chr6 | 610097   | 619543   |
| chr6 | 617710   | 633117   |
| chr6 | 617710   | 637861   |

|      |          |          |
|------|----------|----------|
| chr6 | 629834   | 637861   |
| chr6 | 632940   | 637861   |
| chr6 | 63646526 | 63680161 |
| chr6 | 63678827 | 63680161 |
| chr6 | 63694580 | 63700466 |
| chr6 | 69737941 | 69752356 |
| chr6 | 69741788 | 69752356 |
| chr6 | 69749340 | 69790472 |
| chr6 | 70415290 | 70502791 |
| chr6 | 70426438 | 70452571 |
| chr6 | 70426438 | 70491083 |
| chr6 | 70428303 | 70482154 |
| chr6 | 70428303 | 70491083 |
| chr6 | 70452491 | 70502791 |
| chr6 | 70486166 | 70502791 |
| chr6 | 70533159 | 70536411 |
| chr6 | 70732377 | 70773425 |
| chr6 | 70732377 | 70798737 |
| chr6 | 70754979 | 70798737 |
| chr6 | 71293292 | 71296817 |
| chr6 | 7176654  | 7182082  |
| chr6 | 7176654  | 7189322  |
| chr6 | 7181123  | 7189322  |
| chr6 | 7181123  | 7211709  |
| chr6 | 7187433  | 7189322  |
| chr6 | 7187433  | 7211709  |
| chr6 | 7187433  | 7226656  |
| chr6 | 72640733 | 72677214 |
| chr6 | 73003907 | 73042062 |
| chr6 | 73105256 | 73120577 |
| chr6 | 73111307 | 73169854 |
| chr6 | 73133420 | 73169854 |
| chr6 | 73428708 | 73440445 |
| chr6 | 73428708 | 73445747 |
| chr6 | 73440208 | 73445747 |
| chr6 | 73466208 | 73466606 |
| chr6 | 73479731 | 73482244 |
| chr6 | 73480674 | 73482244 |
| chr6 | 73480674 | 73492352 |
| chr6 | 73610399 | 73636707 |
| chr6 | 73635381 | 73636707 |
| chr6 | 73723250 | 73736508 |
| chr6 | 73723250 | 73771581 |
| chr6 | 73730343 | 73759028 |
| chr6 | 7398697  | 7404555  |

|      |          |          |
|------|----------|----------|
| chr6 | 7398697  | 7405355  |
| chr6 | 7410385  | 7411451  |
| chr6 | 7410385  | 7414390  |
| chr6 | 75142031 | 75145455 |
| chr6 | 75152332 | 75155854 |
| chr6 | 75177662 | 75194947 |
| chr6 | 75188361 | 75192355 |
| chr6 | 75258779 | 75265338 |
| chr6 | 75260823 | 75267748 |
| chr6 | 75621531 | 75623960 |
| chr6 | 75621531 | 75633726 |
| chr6 | 75621531 | 75634811 |
| chr6 | 75621531 | 75647801 |
| chr6 | 75621531 | 75659407 |
| chr6 | 75634706 | 75670720 |
| chr6 | 75640683 | 75663518 |
| chr6 | 75647730 | 75659407 |
| chr6 | 75647730 | 75666941 |
| chr6 | 75659261 | 75670720 |
| chr6 | 75702644 | 75709630 |
| chr6 | 75702644 | 75711416 |
| chr6 | 75817500 | 75832947 |
| chr6 | 75817500 | 75841378 |
| chr6 | 75822781 | 75832947 |
| chr6 | 75822781 | 75841378 |
| chr6 | 75835900 | 75841378 |
| chr6 | 75835900 | 75844977 |
| chr6 | 75840584 | 75841378 |
| chr6 | 75840584 | 75844977 |
| chr6 | 75844896 | 75858993 |
| chr6 | 75844896 | 75866621 |
| chr6 | 75844896 | 75873300 |
| chr6 | 75848350 | 75858993 |
| chr6 | 75861022 | 75873300 |
| chr6 | 75866525 | 75881818 |
| chr6 | 75879819 | 75880120 |
| chr6 | 75886003 | 75886994 |
| chr6 | 7601335  | 7606195  |
| chr6 | 7602622  | 7606195  |
| chr6 | 7845139  | 7862498  |
| chr6 | 78954813 | 78961810 |
| chr6 | 78954813 | 78966056 |
| chr6 | 78988208 | 78990985 |
| chr6 | 78997413 | 79026164 |
| chr6 | 79015081 | 79025619 |

|      |          |          |
|------|----------|----------|
| chr6 | 79015081 | 79026164 |
| chr6 | 79015081 | 79043003 |
| chr6 | 79017482 | 79025619 |
| chr6 | 79017482 | 79026164 |
| chr6 | 79019088 | 79026164 |
| chr6 | 79025518 | 79026164 |
| chr6 | 79042842 | 79060818 |
| chr6 | 79042842 | 79077913 |
| chr6 | 79060477 | 79060818 |
| chr6 | 79513211 | 79519085 |
| chr6 | 79924951 | 79926381 |
| chr6 | 80005841 | 80014586 |
| chr6 | 80011728 | 80040703 |
| chr6 | 80013278 | 80022472 |
| chr6 | 80027884 | 80035417 |
| chr6 | 80127546 | 80171390 |
| chr6 | 80127546 | 80273221 |
| chr6 | 80129160 | 80203212 |
| chr6 | 80167677 | 80203212 |
| chr6 | 80200933 | 80203212 |
| chr6 | 82181878 | 82194642 |
| chr6 | 82191072 | 82196446 |
| chr6 | 82194478 | 82211572 |
| chr6 | 82202527 | 82212793 |
| chr6 | 82210813 | 82211572 |
| chr6 | 82210813 | 82212793 |
| chr6 | 82214226 | 82223620 |
| chr6 | 82223439 | 82231842 |
| chr6 | 82223439 | 82234255 |
| chr6 | 82224067 | 82225647 |
| chr6 | 82224067 | 82231842 |
| chr6 | 82224067 | 82234255 |
| chr6 | 82225476 | 82231842 |
| chr6 | 82225476 | 82234255 |
| chr6 | 82957311 | 83024038 |
| chr6 | 82957311 | 83038485 |
| chr6 | 82957311 | 83044659 |
| chr6 | 83018972 | 83038485 |
| chr6 | 83018972 | 83044659 |
| chr6 | 83018972 | 83054238 |
| chr6 | 83022452 | 83054238 |
| chr6 | 83044427 | 83058022 |
| chr6 | 83096730 | 83100886 |
| chr6 | 83096730 | 83113421 |
| chr6 | 83096924 | 83100886 |

|      |          |          |
|------|----------|----------|
| chr6 | 83096924 | 83113421 |
| chr6 | 83108909 | 83110314 |
| chr6 | 83148758 | 83152367 |
| chr6 | 83152287 | 83154043 |
| chr6 | 83170304 | 83172059 |
| chr6 | 83171936 | 83187075 |
| chr6 | 83174373 | 83178756 |
| chr6 | 83216497 | 83227477 |
| chr6 | 83227334 | 83239636 |
| chr6 | 83227334 | 83352139 |
| chr6 | 83315309 | 83352139 |
| chr6 | 83315309 | 83407901 |
| chr6 | 83346172 | 83352139 |
| chr6 | 83346172 | 83398516 |
| chr6 | 83346172 | 83407901 |
| chr6 | 83398366 | 83407901 |
| chr6 | 83641095 | 83665581 |
| chr6 | 83909008 | 83924592 |
| chr6 | 83918004 | 83924592 |
| chr6 | 83924469 | 83936376 |
| chr6 | 83934594 | 83936376 |
| chr6 | 84185186 | 84186623 |
| chr6 | 84185186 | 84204096 |
| chr6 | 84194883 | 84200905 |
| chr6 | 84201736 | 84221171 |
| chr6 | 8420720  | 8434430  |
| chr6 | 84212956 | 84221171 |
| chr6 | 84444386 | 84470904 |
| chr6 | 84738496 | 84748087 |
| chr6 | 84738496 | 84756869 |
| chr6 | 84738496 | 84762748 |
| chr6 | 85467059 | 85492177 |
| chr6 | 85471236 | 85487489 |
| chr6 | 85507232 | 85526237 |
| chr6 | 85507232 | 85558060 |
| chr6 | 85513799 | 85558060 |
| chr6 | 85517755 | 85528362 |
| chr6 | 85517755 | 85530275 |
| chr6 | 85517755 | 85533800 |
| chr6 | 85517755 | 85536924 |
| chr6 | 85517755 | 85567577 |
| chr6 | 85526125 | 85542043 |
| chr6 | 85530191 | 85542043 |
| chr6 | 85533598 | 85542043 |
| chr6 | 85536791 | 85542043 |



|      |          |          |
|------|----------|----------|
| chr6 | 85541984 | 85548376 |
| chr6 | 85543181 | 85567577 |
| chr6 | 85543604 | 85547226 |
| chr6 | 85543604 | 85558060 |
| chr6 | 85557975 | 85565419 |
| chr6 | 85557975 | 85567577 |
| chr6 | 85557975 | 85572374 |
| chr6 | 85557975 | 85574378 |
| chr6 | 85565331 | 85572374 |
| chr6 | 85565331 | 85574378 |
| chr6 | 85567533 | 85574378 |
| chr6 | 85618817 | 85619417 |
| chr6 | 85618817 | 85622687 |
| chr6 | 85618817 | 85624112 |
| chr6 | 85636966 | 85637356 |
| chr6 | 85636966 | 85641451 |
| chr6 | 85640220 | 85641451 |
| chr6 | 87215902 | 87218731 |
| chr6 | 87215902 | 87233527 |
| chr6 | 87215902 | 87245644 |
| chr6 | 87518629 | 87530942 |
| chr6 | 87541917 | 87569590 |
| chr6 | 87555407 | 87569590 |
| chr6 | 87601783 | 87606021 |
| chr6 | 87601783 | 87612248 |
| chr6 | 87605916 | 87609229 |
| chr6 | 87621353 | 87622013 |
| chr6 | 87621353 | 87636486 |
| chr6 | 87621353 | 87653249 |
| chr6 | 87656902 | 87658018 |
| chr6 | 87675859 | 87681763 |
| chr6 | 87677817 | 87681763 |
| chr6 | 88678352 | 88844521 |
| chr6 | 88678352 | 88904955 |
| chr6 | 88769773 | 88844521 |
| chr6 | 88769773 | 88853764 |
| chr6 | 88769773 | 88904955 |
| chr6 | 88801563 | 88853764 |
| chr6 | 88801563 | 88904955 |
| chr6 | 88844356 | 88853764 |
| chr6 | 88844356 | 88891915 |
| chr6 | 88844356 | 88904955 |
| chr6 | 88844356 | 88941180 |
| chr6 | 88890494 | 88891915 |
| chr6 | 88890494 | 88941180 |

|      |          |          |
|------|----------|----------|
| chr6 | 88904714 | 88906440 |
| chr6 | 88904714 | 88941180 |
| chr6 | 88906364 | 88941180 |
| chr6 | 88928984 | 88941180 |
| chr6 | 89333085 | 89343756 |
| chr6 | 89335301 | 89343756 |
| chr6 | 89338458 | 89342455 |
| chr6 | 89342323 | 89343756 |
| chr6 | 89372436 | 89380367 |
| chr6 | 89372436 | 89387590 |
| chr6 | 89377670 | 89387590 |
| chr6 | 89595915 | 89606105 |
| chr6 | 89670918 | 89673462 |
| chr6 | 89677569 | 89678745 |
| chr6 | 89677569 | 89685973 |
| chr6 | 89677569 | 89688808 |
| chr6 | 89677569 | 89690143 |
| chr6 | 89677569 | 89725396 |
| chr6 | 89683131 | 89688808 |
| chr6 | 89690672 | 89694183 |
| chr6 | 89690672 | 89702061 |
| chr6 | 89714542 | 89725396 |
| chr6 | 89722954 | 89723619 |
| chr6 | 89722954 | 89725396 |
| chr6 | 89732556 | 89743714 |
| chr6 | 89738325 | 89743714 |
| chr6 | 89738325 | 89762530 |
| chr6 | 89740233 | 89754230 |
| chr6 | 89743149 | 89747470 |
| chr6 | 89743149 | 89750532 |
| chr6 | 89745272 | 89750532 |
| chr6 | 89747328 | 89750532 |
| chr6 | 89749222 | 89750532 |
| chr6 | 89751430 | 89753622 |
| chr6 | 89751430 | 89756390 |
| chr6 | 89751430 | 89762530 |
| chr6 | 89753511 | 89762530 |
| chr6 | 89771560 | 89774733 |
| chr6 | 89771560 | 89780293 |
| chr6 | 89781398 | 89785126 |
| chr6 | 89781398 | 89790401 |
| chr6 | 89781398 | 89794207 |
| chr6 | 89781398 | 89803554 |
| chr6 | 89785011 | 89803554 |
| chr6 | 89789779 | 89794801 |

|      |          |          |
|------|----------|----------|
| chr6 | 89846561 | 89855544 |
| chr6 | 89846561 | 89857199 |
| chr6 | 89853165 | 89855544 |
| chr6 | 89853165 | 89857199 |
| chr6 | 89854816 | 89857199 |
| chr6 | 90536336 | 90571807 |
| chr6 | 90547257 | 90553586 |
| chr6 | 90547257 | 90568623 |
| chr6 | 90550467 | 90571807 |
| chr6 | 90556499 | 90560214 |
| chr6 | 90556499 | 90571807 |
| chr6 | 90560075 | 90571807 |
| chr6 | 90561621 | 90571807 |
| chr6 | 96523145 | 96526435 |
| chr6 | 96523145 | 96528632 |
| chr6 | 96523145 | 96540655 |
| chr6 | 97165245 | 97168240 |
| chr6 | 97228893 | 97263448 |
| chr6 | 97254556 | 97263448 |
| chr6 | 98875414 | 98927822 |
| chr6 | 98880552 | 98927822 |
| chr6 | 98880552 | 98934879 |
| chr6 | 98899267 | 98905670 |
| chr6 | 98899267 | 98927822 |
| chr6 | 98899267 | 98934879 |
| chr6 | 98926476 | 98927822 |
| chr6 | 99375939 | 99380341 |
| chr6 | 99375939 | 99383824 |
| chr6 | 99377385 | 99380341 |
| chr6 | 99377385 | 99383824 |
| chr6 | 99406030 | 99408271 |
| chr6 | 99412550 | 99416428 |
| chr6 | 99437245 | 99443662 |
| chr6 | 99439768 | 99465136 |
| chr6 | 99464603 | 99468618 |
| chr6 | 99468536 | 99510230 |
| chr6 | 99476142 | 99488820 |
| chr6 | 99476142 | 99510230 |
| chr6 | 99482752 | 99510230 |
| chr6 | 99488199 | 99510230 |
| chr6 | 99503764 | 99510230 |
| chr6 | 99507427 | 99510230 |
| chr6 | 99545111 | 99551895 |
| chr6 | 99549507 | 99561681 |
| chr6 | 99558496 | 99561681 |

|      |           |           |
|------|-----------|-----------|
| chr6 | 99558496  | 99562948  |
| chr6 | 99561366  | 99562948  |
| chr7 | 100023418 | 100024307 |
| chr7 | 100075134 | 100077433 |
| chr7 | 100075134 | 100079656 |
| chr7 | 100077302 | 100079656 |
| chr7 | 100102674 | 100102960 |
| chr7 | 100103408 | 100104154 |
| chr7 | 100222596 | 100223698 |
| chr7 | 100325690 | 100329019 |
| chr7 | 100330462 | 100332581 |
| chr7 | 100355142 | 100359537 |
| chr7 | 100548821 | 100555735 |
| chr7 | 100553346 | 100554258 |
| chr7 | 100683549 | 100683918 |
| chr7 | 100687297 | 100687616 |
| chr7 | 100812746 | 100813208 |
| chr7 | 100819556 | 100820296 |
| chr7 | 100856867 | 100859161 |
| chr7 | 100884922 | 100885370 |
| chr7 | 101211590 | 101213204 |
| chr7 | 101916114 | 102028145 |
| chr7 | 101916114 | 102070417 |
| chr7 | 101916114 | 102115273 |
| chr7 | 102028097 | 102115273 |
| chr7 | 102070338 | 102104459 |
| chr7 | 102070338 | 102115273 |
| chr7 | 102097363 | 102115273 |
| chr7 | 102158559 | 102178657 |
| chr7 | 102158559 | 102189871 |
| chr7 | 102198801 | 102200172 |
| chr7 | 102314335 | 102317395 |
| chr7 | 102375822 | 102376322 |
| chr7 | 102375822 | 102399648 |
| chr7 | 102397619 | 102404683 |
| chr7 | 102397619 | 102407498 |
| chr7 | 102399547 | 102407498 |
| chr7 | 102465816 | 102466270 |
| chr7 | 102539605 | 102569924 |
| chr7 | 102566996 | 102569924 |
| chr7 | 102757853 | 102761411 |
| chr7 | 102757853 | 102787469 |
| chr7 | 102772408 | 102787469 |
| chr7 | 102822039 | 102822440 |
| chr7 | 102822039 | 102854860 |

|      |           |           |
|------|-----------|-----------|
| chr7 | 102822039 | 102883685 |
| chr7 | 102822039 | 102884312 |
| chr7 | 102832839 | 102883467 |
| chr7 | 102832839 | 102884312 |
| chr7 | 102854776 | 102883467 |
| chr7 | 102854776 | 102884312 |
| chr7 | 102877466 | 102884312 |
| chr7 | 102878330 | 102884312 |
| chr7 | 102913085 | 102931933 |
| chr7 | 102963532 | 103029418 |
| chr7 | 103025062 | 103029418 |
| chr7 | 103115059 | 103120223 |
| chr7 | 103115059 | 103128792 |
| chr7 | 103298567 | 103310475 |
| chr7 | 103300177 | 103304490 |
| chr7 | 103303841 | 103304490 |
| chr7 | 103303841 | 103310475 |
| chr7 | 103308951 | 103310475 |
| chr7 | 103316829 | 103319678 |
| chr7 | 103361956 | 103362758 |
| chr7 | 104136780 | 104165282 |
| chr7 | 104136780 | 104168525 |
| chr7 | 104161071 | 104188381 |
| chr7 | 104161071 | 104204234 |
| chr7 | 104166771 | 104204234 |
| chr7 | 104188250 | 104204234 |
| chr7 | 105038125 | 105041023 |
| chr7 | 105038125 | 105066807 |
| chr7 | 105040838 | 105066807 |
| chr7 | 105040838 | 105081797 |
| chr7 | 105062163 | 105066807 |
| chr7 | 105062163 | 105078963 |
| chr7 | 105062163 | 105081797 |
| chr7 | 105073618 | 105074815 |
| chr7 | 105073618 | 105077433 |
| chr7 | 105073618 | 105081797 |
| chr7 | 105076042 | 105077193 |
| chr7 | 105078845 | 105091314 |
| chr7 | 105090008 | 105091314 |
| chr7 | 105160506 | 105169265 |
| chr7 | 105160506 | 105203785 |
| chr7 | 105160506 | 105268869 |
| chr7 | 105168007 | 105169265 |
| chr7 | 105203627 | 105268869 |
| chr7 | 105203627 | 105297533 |

|      |           |           |
|------|-----------|-----------|
| chr7 | 105268805 | 105297533 |
| chr7 | 105459167 | 105465414 |
| chr7 | 105459167 | 105495253 |
| chr7 | 105459167 | 105508544 |
| chr7 | 105462620 | 105465414 |
| chr7 | 105462620 | 105468463 |
| chr7 | 105462620 | 105495253 |
| chr7 | 105462620 | 105506273 |
| chr7 | 105465312 | 105470848 |
| chr7 | 105468336 | 105470848 |
| chr7 | 105468336 | 105472193 |
| chr7 | 105470687 | 105495253 |
| chr7 | 105472131 | 105482440 |
| chr7 | 105472131 | 105502564 |
| chr7 | 105472131 | 105506273 |
| chr7 | 105481051 | 105482440 |
| chr7 | 105481051 | 105495253 |
| chr7 | 105481051 | 105502564 |
| chr7 | 105481051 | 105508544 |
| chr7 | 105491539 | 105502564 |
| chr7 | 105491539 | 105506056 |
| chr7 | 105491539 | 105506273 |
| chr7 | 105495141 | 105506273 |
| chr7 | 105505954 | 105506273 |
| chr7 | 105542407 | 105565648 |
| chr7 | 105546909 | 105548710 |
| chr7 | 105546909 | 105551707 |
| chr7 | 105551569 | 105555227 |
| chr7 | 105551569 | 105565648 |
| chr7 | 105563732 | 105565648 |
| chr7 | 106092948 | 106099282 |
| chr7 | 106097689 | 106099282 |
| chr7 | 107140846 | 107151023 |
| chr7 | 107230614 | 107258383 |
| chr7 | 107248395 | 107258383 |
| chr7 | 107248395 | 107283732 |
| chr7 | 107281299 | 107283732 |
| chr7 | 107281299 | 107298346 |
| chr7 | 107324439 | 107372760 |
| chr7 | 107362032 | 107372760 |
| chr7 | 107362032 | 107412632 |
| chr7 | 107527236 | 107548332 |
| chr7 | 107527236 | 107558115 |
| chr7 | 107564587 | 107576592 |
| chr7 | 107567049 | 107571266 |

|      |           |           |
|------|-----------|-----------|
| chr7 | 107959248 | 107960649 |
| chr7 | 107959690 | 107960649 |
| chr7 | 107974985 | 107980811 |
| chr7 | 10990702  | 11022979  |
| chr7 | 10990702  | 11028818  |
| chr7 | 10990702  | 11042814  |
| chr7 | 11013746  | 11022979  |
| chr7 | 11013746  | 11028818  |
| chr7 | 11013746  | 11038855  |
| chr7 | 11013746  | 11051780  |
| chr7 | 11013746  | 11062085  |
| chr7 | 11022867  | 11051780  |
| chr7 | 11028680  | 11037091  |
| chr7 | 11028680  | 11051780  |
| chr7 | 11028680  | 11062085  |
| chr7 | 11036984  | 11051780  |
| chr7 | 11038759  | 11111467  |
| chr7 | 11040671  | 11051780  |
| chr7 | 11040671  | 11062085  |
| chr7 | 11042682  | 11062085  |
| chr7 | 11051611  | 11062085  |
| chr7 | 11051611  | 11111467  |
| chr7 | 11061790  | 11062085  |
| chr7 | 11061790  | 11111467  |
| chr7 | 110886592 | 111561923 |
| chr7 | 111487237 | 111521449 |
| chr7 | 111487237 | 111561923 |
| chr7 | 111808820 | 111834686 |
| chr7 | 111935539 | 111945798 |
| chr7 | 111977131 | 112004131 |
| chr7 | 111989014 | 112004131 |
| chr7 | 112295868 | 112318273 |
| chr7 | 112455762 | 112456086 |
| chr7 | 112455762 | 112468115 |
| chr7 | 112456001 | 112462378 |
| chr7 | 112456001 | 112472861 |
| chr7 | 112467980 | 112472861 |
| chr7 | 112895568 | 112915447 |
| chr7 | 114942274 | 114979781 |
| chr7 | 116249019 | 116250496 |
| chr7 | 116739949 | 116741025 |
| chr7 | 116740851 | 116769791 |
| chr7 | 116758458 | 116771654 |
| chr7 | 117099761 | 117131960 |
| chr7 | 117099761 | 117138532 |

|      |           |           |
|------|-----------|-----------|
| chr7 | 117136080 | 117170976 |
| chr7 | 120838776 | 120840109 |
| chr7 | 120951163 | 120955624 |
| chr7 | 122092842 | 122133741 |
| chr7 | 122113117 | 122133741 |
| chr7 | 122115073 | 122116957 |
| chr7 | 122129360 | 122133741 |
| chr7 | 12214808  | 12218521  |
| chr7 | 12214808  | 12224385  |
| chr7 | 12214808  | 12230438  |
| chr7 | 12224225  | 12229819  |
| chr7 | 122379367 | 122388738 |
| chr7 | 122379367 | 122393582 |
| chr7 | 122379367 | 122416164 |
| chr7 | 122554549 | 122581290 |
| chr7 | 122554549 | 122621717 |
| chr7 | 122581178 | 122621717 |
| chr7 | 122615180 | 122629328 |
| chr7 | 122615180 | 122663569 |
| chr7 | 123689041 | 123692867 |
| chr7 | 124840972 | 124846998 |
| chr7 | 124842806 | 124859112 |
| chr7 | 124846941 | 124892380 |
| chr7 | 127694827 | 127707647 |
| chr7 | 127698874 | 127707647 |
| chr7 | 127698874 | 127721400 |
| chr7 | 127701162 | 127707647 |
| chr7 | 127701162 | 127721400 |
| chr7 | 127704838 | 127721400 |
| chr7 | 127704838 | 127807573 |
| chr7 | 127707556 | 127721400 |
| chr7 | 127807483 | 127844424 |
| chr7 | 127807483 | 127888012 |
| chr7 | 127807483 | 127904819 |
| chr7 | 127807483 | 127929329 |
| chr7 | 127844323 | 127888012 |
| chr7 | 127887901 | 127929329 |
| chr7 | 128321265 | 128337202 |
| chr7 | 128330818 | 128336042 |
| chr7 | 128335542 | 128336042 |
| chr7 | 128400094 | 128401116 |
| chr7 | 128758870 | 128759852 |
| chr7 | 128835325 | 128855314 |
| chr7 | 128967279 | 128972582 |
| chr7 | 128967279 | 128992090 |



|      |           |           |
|------|-----------|-----------|
| chr7 | 128972425 | 128980031 |
| chr7 | 128978982 | 128980031 |
| chr7 | 128982247 | 128986920 |
| chr7 | 128986728 | 128993914 |
| chr7 | 128989960 | 128993914 |
| chr7 | 128997388 | 129001234 |
| chr7 | 128997388 | 129015135 |
| chr7 | 128997388 | 129018157 |
| chr7 | 129000428 | 129005159 |
| chr7 | 129005015 | 129018157 |
| chr7 | 129014978 | 129018157 |
| chr7 | 129014978 | 129041717 |
| chr7 | 129203383 | 129206587 |
| chr7 | 129205202 | 129206587 |
| chr7 | 129205609 | 129206369 |
| chr7 | 129379637 | 129413688 |
| chr7 | 129379640 | 129389734 |
| chr7 | 129400289 | 129406466 |
| chr7 | 129630077 | 129671543 |
| chr7 | 129630077 | 129690546 |
| chr7 | 129630077 | 129727365 |
| chr7 | 129657342 | 129671543 |
| chr7 | 129657342 | 129690546 |
| chr7 | 129657345 | 129671543 |
| chr7 | 129657345 | 129690546 |
| chr7 | 129657345 | 129711576 |
| chr7 | 129657345 | 129727365 |
| chr7 | 129671428 | 129690546 |
| chr7 | 129671428 | 129727365 |
| chr7 | 129690405 | 129711576 |
| chr7 | 129709074 | 129727365 |
| chr7 | 129710373 | 129711576 |
| chr7 | 129710373 | 129727365 |
| chr7 | 129839206 | 129880971 |
| chr7 | 129857510 | 129880971 |
| chr7 | 130022318 | 130029029 |
| chr7 | 130026157 | 130029029 |
| chr7 | 130026157 | 130039547 |
| chr7 | 130026157 | 130049144 |
| chr7 | 130039463 | 130049144 |
| chr7 | 130040950 | 130049144 |
| chr7 | 130096920 | 130127451 |
| chr7 | 130116444 | 130122202 |
| chr7 | 130116444 | 130125931 |
| chr7 | 130116444 | 130127451 |

|      |           |           |
|------|-----------|-----------|
| chr7 | 130116444 | 130129576 |
| chr7 | 130120748 | 130122202 |
| chr7 | 130170399 | 130181719 |
| chr7 | 130173631 | 130175609 |
| chr7 | 130173631 | 130178527 |
| chr7 | 130181622 | 130192823 |
| chr7 | 130184183 | 130192823 |
| chr7 | 130185191 | 130192823 |
| chr7 | 130201849 | 130202663 |
| chr7 | 130201849 | 130203846 |
| chr7 | 130201849 | 130204110 |
| chr7 | 130203787 | 130204110 |
| chr7 | 130547673 | 130552430 |
| chr7 | 130610952 | 130617065 |
| chr7 | 130610952 | 130652948 |
| chr7 | 130610952 | 130667534 |
| chr7 | 130945719 | 131052555 |
| chr7 | 130967388 | 131052555 |
| chr7 | 130984052 | 131052555 |
| chr7 | 131375423 | 131388972 |
| chr7 | 131375423 | 131399433 |
| chr7 | 131375423 | 131411383 |
| chr7 | 131375423 | 131414710 |
| chr7 | 131375423 | 131429145 |
| chr7 | 131375423 | 131445903 |
| chr7 | 131387119 | 131399433 |
| chr7 | 131387119 | 131411383 |
| chr7 | 131387119 | 131414710 |
| chr7 | 131387119 | 131429145 |
| chr7 | 131387119 | 131445903 |
| chr7 | 131387119 | 131470944 |
| chr7 | 131397266 | 131414710 |
| chr7 | 131411305 | 131429145 |
| chr7 | 131411305 | 131445903 |
| chr7 | 131429032 | 131443702 |
| chr7 | 131429032 | 131445903 |
| chr7 | 131429032 | 131478677 |
| chr7 | 131437784 | 131445903 |
| chr7 | 131443480 | 131478677 |
| chr7 | 131463216 | 131478677 |
| chr7 | 132796441 | 132885745 |
| chr7 | 132838398 | 132885745 |
| chr7 | 132975168 | 133024627 |
| chr7 | 132975168 | 133070229 |
| chr7 | 133274981 | 133289116 |

|      |           |           |
|------|-----------|-----------|
| chr7 | 133288921 | 133317390 |
| chr7 | 133305876 | 133317390 |
| chr7 | 133317283 | 133375002 |
| chr7 | 133630044 | 133938069 |
| chr7 | 133817324 | 133917738 |
| chr7 | 134137022 | 134163540 |
| chr7 | 134137022 | 134174636 |
| chr7 | 134137022 | 134178609 |
| chr7 | 134137022 | 134183853 |
| chr7 | 134137022 | 134191751 |
| chr7 | 134137022 | 134201576 |
| chr7 | 134139435 | 134221918 |
| chr7 | 134148237 | 134174636 |
| chr7 | 134174555 | 134183853 |
| chr7 | 134304804 | 134309479 |
| chr7 | 135197992 | 135209755 |
| chr7 | 135410523 | 135422353 |
| chr7 | 135410523 | 135438423 |
| chr7 | 135413487 | 135422353 |
| chr7 | 135571104 | 135591600 |
| chr7 | 135577795 | 135593192 |
| chr7 | 135584831 | 135587992 |
| chr7 | 135587574 | 135607371 |
| chr7 | 135592986 | 135594729 |
| chr7 | 135600869 | 135604460 |
| chr7 | 135619422 | 135626361 |
| chr7 | 135622776 | 135630470 |
| chr7 | 135625163 | 135630470 |
| chr7 | 135635580 | 135638683 |
| chr7 | 135643191 | 135646231 |
| chr7 | 137619823 | 137690002 |
| chr7 | 137678556 | 137690002 |
| chr7 | 137901353 | 137916012 |
| chr7 | 138504289 | 138515359 |
| chr7 | 138519188 | 138551180 |
| chr7 | 138525240 | 138554966 |
| chr7 | 138525240 | 138573642 |
| chr7 | 138576372 | 138579532 |
| chr7 | 138861138 | 138869761 |
| chr7 | 138861138 | 138881584 |
| chr7 | 138867974 | 138869761 |
| chr7 | 138894341 | 138911323 |
| chr7 | 138894341 | 138912460 |
| chr7 | 138908990 | 138912460 |
| chr7 | 138908990 | 138919438 |

|      |           |           |
|------|-----------|-----------|
| chr7 | 138911145 | 138912460 |
| chr7 | 139026707 | 139034678 |
| chr7 | 139053450 | 139061138 |
| chr7 | 139055204 | 139061138 |
| chr7 | 139061035 | 139074030 |
| chr7 | 13906429  | 13911307  |
| chr7 | 139073855 | 139089759 |
| chr7 | 139083779 | 139089759 |
| chr7 | 139142255 | 139148377 |
| chr7 | 139166839 | 139178598 |
| chr7 | 139237004 | 139252057 |
| chr7 | 139237004 | 139259370 |
| chr7 | 139237004 | 139266403 |
| chr7 | 139237004 | 139273410 |
| chr7 | 139251955 | 139266403 |
| chr7 | 139266332 | 139272440 |
| chr7 | 139269393 | 139276147 |
| chr7 | 139269393 | 139279360 |
| chr7 | 13931501  | 13977480  |
| chr7 | 139376061 | 139417729 |
| chr7 | 139398598 | 139407350 |
| chr7 | 139402136 | 139407350 |
| chr7 | 139405643 | 139412580 |
| chr7 | 139407173 | 139409654 |
| chr7 | 139407173 | 139412580 |
| chr7 | 139620400 | 139626785 |
| chr7 | 139620400 | 139629039 |
| chr7 | 139780739 | 139911321 |
| chr7 | 140034234 | 140047007 |
| chr7 | 140034234 | 140058034 |
| chr7 | 140041643 | 140047007 |
| chr7 | 140041643 | 140058034 |
| chr7 | 140054661 | 140058034 |
| chr7 | 140096554 | 140111184 |
| chr7 | 140111094 | 140120529 |
| chr7 | 140119112 | 140120529 |
| chr7 | 140127441 | 140129653 |
| chr7 | 140355667 | 140358785 |
| chr7 | 140355667 | 140369682 |
| chr7 | 140459006 | 140472011 |
| chr7 | 140702865 | 140704963 |
| chr7 | 140739811 | 140754233 |
| chr7 | 140739811 | 140787584 |
| chr7 | 140749286 | 140754233 |
| chr7 | 140749286 | 140794467 |

|      |           |           |
|------|-----------|-----------|
| chr7 | 140776911 | 140781693 |
| chr7 | 140776911 | 140783157 |
| chr7 | 140776911 | 140787584 |
| chr7 | 140776911 | 140794467 |
| chr7 | 140776911 | 140808995 |
| chr7 | 140781575 | 140783157 |
| chr7 | 140781575 | 140794467 |
| chr7 | 140794307 | 140808995 |
| chr7 | 140794307 | 140834872 |
| chr7 | 140794307 | 140850212 |
| chr7 | 140800361 | 140808995 |
| chr7 | 140807959 | 140808995 |
| chr7 | 141596561 | 141611287 |
| chr7 | 141601204 | 141621801 |
| chr7 | 141601204 | 141633980 |
| chr7 | 141601204 | 141641908 |
| chr7 | 141611194 | 141621801 |
| chr7 | 141633900 | 141641908 |
| chr7 | 141633900 | 141649333 |
| chr7 | 141636959 | 141641908 |
| chr7 | 141636959 | 141649333 |
| chr7 | 141685477 | 141686658 |
| chr7 | 143292299 | 143292698 |
| chr7 | 1438096   | 1450288   |
| chr7 | 144623165 | 144648879 |
| chr7 | 1473071   | 1473693   |
| chr7 | 1486624   | 1489682   |
| chr7 | 148756982 | 148759638 |
| chr7 | 148766560 | 148767749 |
| chr7 | 148809309 | 148847305 |
| chr7 | 148817876 | 148819687 |
| chr7 | 148826468 | 148847305 |
| chr7 | 148832633 | 148847305 |
| chr7 | 148846469 | 148847305 |
| chr7 | 148846496 | 148847305 |
| chr7 | 149011845 | 149021147 |
| chr7 | 149014903 | 149021147 |
| chr7 | 149018991 | 149021147 |
| chr7 | 149074385 | 149080717 |
| chr7 | 149153944 | 149166930 |
| chr7 | 149166157 | 149166930 |
| chr7 | 149198332 | 149213814 |
| chr7 | 149206695 | 149207470 |
| chr7 | 149206695 | 149213814 |
| chr7 | 149266334 | 149278527 |

|      |           |           |
|------|-----------|-----------|
| chr7 | 149476921 | 149494503 |
| chr7 | 151117094 | 151118632 |
| chr7 | 151123793 | 151128684 |
| chr7 | 151470570 | 151491014 |
| chr7 | 151477332 | 151491014 |
| chr7 | 151560523 | 151574949 |
| chr7 | 151564077 | 151570225 |
| chr7 | 151564077 | 151572709 |
| chr7 | 151781151 | 151786541 |
| chr7 | 152094189 | 152110645 |
| chr7 | 152103111 | 152113398 |
| chr7 | 152108037 | 152113398 |
| chr7 | 152185557 | 152199459 |
| chr7 | 152194008 | 152199459 |
| chr7 | 152194008 | 152238826 |
| chr7 | 152199278 | 152207428 |
| chr7 | 152205105 | 152207428 |
| chr7 | 152220522 | 152222066 |
| chr7 | 152220522 | 152222682 |
| chr7 | 152220522 | 152224616 |
| chr7 | 152220522 | 152238826 |
| chr7 | 152229922 | 152238826 |
| chr7 | 152230219 | 152238826 |
| chr7 | 152235816 | 152238826 |
| chr7 | 152238706 | 152250966 |
| chr7 | 152247901 | 152252715 |
| chr7 | 152263015 | 152265209 |
| chr7 | 152263015 | 152315338 |
| chr7 | 152263015 | 152358675 |
| chr7 | 152273704 | 152315338 |
| chr7 | 152309965 | 152315338 |
| chr7 | 152309965 | 152330739 |
| chr7 | 152309965 | 152358675 |
| chr7 | 152330600 | 152358675 |
| chr7 | 152783186 | 152801731 |
| chr7 | 152783186 | 152825122 |
| chr7 | 152800530 | 152801731 |
| chr7 | 152800530 | 152825122 |
| chr7 | 154954254 | 154955631 |
| chr7 | 154960892 | 154962458 |
| chr7 | 154975695 | 154998784 |
| chr7 | 154983218 | 154998784 |
| chr7 | 155301565 | 155302417 |
| chr7 | 155665174 | 155678684 |
| chr7 | 155665174 | 155680908 |

|      |           |           |
|------|-----------|-----------|
| chr7 | 155672866 | 155680908 |
| chr7 | 155672866 | 155707068 |
| chr7 | 155678607 | 155680908 |
| chr7 | 155700772 | 155707068 |
| chr7 | 155700772 | 155718443 |
| chr7 | 155706859 | 155711455 |
| chr7 | 155706859 | 155718443 |
| chr7 | 155763811 | 155766655 |
| chr7 | 156724111 | 156728720 |
| chr7 | 156724111 | 156734257 |
| chr7 | 156724111 | 156756465 |
| chr7 | 156724111 | 156763795 |
| chr7 | 156724111 | 156826744 |
| chr7 | 156734176 | 156826744 |
| chr7 | 156756392 | 156763795 |
| chr7 | 156756392 | 156826744 |
| chr7 | 156762133 | 156796492 |
| chr7 | 156762133 | 156826744 |
| chr7 | 156796388 | 156826744 |
| chr7 | 156796388 | 156836885 |
| chr7 | 156826604 | 156836885 |
| chr7 | 156959850 | 156964026 |
| chr7 | 156966269 | 156967092 |
| chr7 | 157163809 | 157170450 |
| chr7 | 157163809 | 157175034 |
| chr7 | 157163809 | 157231327 |
| chr7 | 157169047 | 157187021 |
| chr7 | 157169047 | 157216971 |
| chr7 | 157181517 | 157187021 |
| chr7 | 157183877 | 157201807 |
| chr7 | 157201720 | 157207935 |
| chr7 | 157201720 | 157220776 |
| chr7 | 157201720 | 157225539 |
| chr7 | 157201720 | 157231327 |
| chr7 | 157201720 | 157248580 |
| chr7 | 157207397 | 157216971 |
| chr7 | 157207702 | 157225539 |
| chr7 | 157216866 | 157225539 |
| chr7 | 157216866 | 157231327 |
| chr7 | 157220688 | 157223351 |
| chr7 | 157220688 | 157231327 |
| chr7 | 157220688 | 157248580 |
| chr7 | 157220688 | 157254310 |
| chr7 | 157220688 | 157257044 |
| chr7 | 157223253 | 157225539 |

|      |           |           |
|------|-----------|-----------|
| chr7 | 157223253 | 157231327 |
| chr7 | 157223253 | 157248580 |
| chr7 | 157231079 | 157248580 |
| chr7 | 157358546 | 157385611 |
| chr7 | 157382245 | 157385611 |
| chr7 | 1574714   | 1575888   |
| chr7 | 158644288 | 158646563 |
| chr7 | 158644288 | 158664750 |
| chr7 | 158664183 | 158687442 |
| chr7 | 158671513 | 158675616 |
| chr7 | 158671513 | 158675656 |
| chr7 | 158671513 | 158687442 |
| chr7 | 158675476 | 158689953 |
| chr7 | 158679959 | 158689953 |
| chr7 | 158679959 | 158690722 |
| chr7 | 158686171 | 158689953 |
| chr7 | 158686171 | 158690722 |
| chr7 | 158692841 | 158693497 |
| chr7 | 158735502 | 158739121 |
| chr7 | 158735502 | 158748280 |
| chr7 | 158735502 | 158788417 |
| chr7 | 158739022 | 158748280 |
| chr7 | 158739022 | 158767774 |
| chr7 | 158748193 | 158767774 |
| chr7 | 158748193 | 158793726 |
| chr7 | 158748193 | 158799072 |
| chr7 | 158759485 | 158764853 |
| chr7 | 158759485 | 158767774 |
| chr7 | 158759485 | 158773396 |
| chr7 | 158759485 | 158793726 |
| chr7 | 158759485 | 158799072 |
| chr7 | 158761495 | 158799072 |
| chr7 | 158773340 | 158799072 |
| chr7 | 158788003 | 158799072 |
| chr7 | 158788344 | 158799072 |
| chr7 | 158793649 | 158798076 |
| chr7 | 158879683 | 158906091 |
| chr7 | 158901738 | 158906091 |
| chr7 | 158911549 | 158918869 |
| chr7 | 16624982  | 16636455  |
| chr7 | 16665436  | 16674588  |
| chr7 | 16665436  | 16682845  |
| chr7 | 16665436  | 16689906  |
| chr7 | 16665436  | 16697061  |
| chr7 | 16674411  | 16681404  |



|      |          |          |
|------|----------|----------|
| chr7 | 16674411 | 16682845 |
| chr7 | 16681300 | 16689906 |
| chr7 | 16681300 | 16697061 |
| chr7 | 16682779 | 16697061 |
| chr7 | 16685904 | 16689906 |
| chr7 | 16685904 | 16697061 |
| chr7 | 16689796 | 16697061 |
| chr7 | 16694833 | 16697061 |
| chr7 | 16698047 | 16704669 |
| chr7 | 16776210 | 16779116 |
| chr7 | 17309935 | 17322607 |
| chr7 | 17309935 | 17335786 |
| chr7 | 17796826 | 17826091 |
| chr7 | 17799008 | 17830047 |
| chr7 | 17814833 | 17816289 |
| chr7 | 17814833 | 17830047 |
| chr7 | 17814833 | 17850964 |
| chr7 | 17814833 | 17868490 |
| chr7 | 17814833 | 17875790 |
| chr7 | 17821508 | 17850435 |
| chr7 | 17830009 | 17845694 |
| chr7 | 17830009 | 17873616 |
| chr7 | 17834051 | 17840000 |
| chr7 | 17834051 | 17850964 |
| chr7 | 17834051 | 17873616 |
| chr7 | 17845594 | 17850964 |
| chr7 | 17845594 | 17868490 |
| chr7 | 17845594 | 17875790 |
| chr7 | 17845594 | 17897446 |
| chr7 | 17850346 | 17875790 |
| chr7 | 17850825 | 17875790 |
| chr7 | 17868406 | 17875790 |
| chr7 | 17868406 | 17890484 |
| chr7 | 17868406 | 17893434 |
| chr7 | 17868406 | 17897446 |
| chr7 | 17873527 | 17875790 |
| chr7 | 17875479 | 17875790 |
| chr7 | 17875479 | 17893434 |
| chr7 | 17890362 | 17893434 |
| chr7 | 17890362 | 17897446 |
| chr7 | 18585280 | 18594029 |
| chr7 | 18585280 | 18666476 |
| chr7 | 18644670 | 18648683 |
| chr7 | 18644670 | 18666476 |
| chr7 | 18647784 | 18666476 |

|      |          |          |
|------|----------|----------|
| chr7 | 18727579 | 18749138 |
| chr7 | 1898199  | 1936897  |
| chr7 | 1898199  | 1957719  |
| chr7 | 1898199  | 1980541  |
| chr7 | 1898199  | 2014642  |
| chr7 | 1898199  | 2069338  |
| chr7 | 1936686  | 1957719  |
| chr7 | 1936686  | 1980541  |
| chr7 | 1936686  | 2002121  |
| chr7 | 1957628  | 1980541  |
| chr7 | 1957628  | 2002121  |
| chr7 | 1957628  | 2014642  |
| chr7 | 1980452  | 2014642  |
| chr7 | 1980452  | 2069338  |
| chr7 | 1980452  | 2149238  |
| chr7 | 2002064  | 2014642  |
| chr7 | 2002064  | 2069338  |
| chr7 | 2014501  | 2069338  |
| chr7 | 2014501  | 2219456  |
| chr7 | 2069193  | 2219456  |
| chr7 | 2069193  | 2222754  |
| chr7 | 208897   | 248430   |
| chr7 | 21477078 | 21482123 |
| chr7 | 2149151  | 2219456  |
| chr7 | 2149151  | 2222754  |
| chr7 | 2213211  | 2218043  |
| chr7 | 2213211  | 2219456  |
| chr7 | 2213211  | 2222754  |
| chr7 | 2213211  | 2225550  |
| chr7 | 22150406 | 22160615 |
| chr7 | 22219865 | 22267012 |
| chr7 | 22219865 | 22291241 |
| chr7 | 2222574  | 2230727  |
| chr7 | 22266963 | 22318037 |
| chr7 | 22291174 | 22315476 |
| chr7 | 22291174 | 22318037 |
| chr7 | 2229983  | 2230724  |
| chr7 | 2229983  | 2230727  |
| chr7 | 2229983  | 2230764  |
| chr7 | 22308338 | 22318037 |
| chr7 | 2244562  | 2250002  |
| chr7 | 22492564 | 22494886 |
| chr7 | 2256873  | 2278305  |
| chr7 | 2263229  | 2269639  |
| chr7 | 2264297  | 2278305  |

|      |          |          |
|------|----------|----------|
| chr7 | 2269558  | 2275229  |
| chr7 | 2269558  | 2278305  |
| chr7 | 2271849  | 2278305  |
| chr7 | 2275111  | 2278305  |
| chr7 | 22960255 | 22964531 |
| chr7 | 22960255 | 22977421 |
| chr7 | 22960255 | 22978448 |
| chr7 | 22960255 | 22984045 |
| chr7 | 22960255 | 22991139 |
| chr7 | 22961234 | 22991139 |
| chr7 | 22964414 | 22977421 |
| chr7 | 22964414 | 22991139 |
| chr7 | 22976209 | 22977421 |
| chr7 | 22976209 | 22984045 |
| chr7 | 22976209 | 22991139 |
| chr7 | 22977340 | 22991139 |
| chr7 | 22983943 | 22991139 |
| chr7 | 23117833 | 23125172 |
| chr7 | 23123776 | 23125172 |
| chr7 | 23123776 | 23140944 |
| chr7 | 23123776 | 23144025 |
| chr7 | 23123776 | 23152209 |
| chr7 | 23140768 | 23144025 |
| chr7 | 23140768 | 23152209 |
| chr7 | 23185069 | 23187146 |
| chr7 | 23185069 | 23196766 |
| chr7 | 23317638 | 23346062 |
| chr7 | 23317638 | 23351586 |
| chr7 | 23342063 | 23346062 |
| chr7 | 23342063 | 23351586 |
| chr7 | 23342063 | 23361741 |
| chr7 | 23345939 | 23351586 |
| chr7 | 23345939 | 23361741 |
| chr7 | 23351304 | 23468542 |
| chr7 | 23505745 | 23507535 |
| chr7 | 23505745 | 23513082 |
| chr7 | 23505745 | 23521840 |
| chr7 | 23505745 | 23522432 |
| chr7 | 23507419 | 23513082 |
| chr7 | 23507419 | 23516528 |
| chr7 | 23521706 | 23522432 |
| chr7 | 2360709  | 2364529  |
| chr7 | 2362644  | 2363760  |
| chr7 | 2362644  | 2364529  |
| chr7 | 2363631  | 2364529  |

|      |          |          |
|------|----------|----------|
| chr7 | 2363631  | 2367045  |
| chr7 | 2364371  | 2366448  |
| chr7 | 2364371  | 2367045  |
| chr7 | 2364371  | 2369682  |
| chr7 | 2364371  | 2371849  |
| chr7 | 2366316  | 2369682  |
| chr7 | 2366316  | 2371849  |
| chr7 | 2366524  | 2379511  |
| chr7 | 2369471  | 2371849  |
| chr7 | 2371776  | 2372795  |
| chr7 | 2374527  | 2377075  |
| chr7 | 2375388  | 2379242  |
| chr7 | 2375388  | 2379511  |
| chr7 | 2376949  | 2379511  |
| chr7 | 24620051 | 24641868 |
| chr7 | 24620051 | 24650712 |
| chr7 | 24620051 | 24663721 |
| chr7 | 24620051 | 24666089 |
| chr7 | 24620051 | 24668660 |
| chr7 | 24620051 | 24680520 |
| chr7 | 24623665 | 24641868 |
| chr7 | 24623665 | 24650712 |
| chr7 | 24623665 | 24663721 |
| chr7 | 24623665 | 24668660 |
| chr7 | 24623665 | 24680520 |
| chr7 | 246414   | 248430   |
| chr7 | 24641715 | 24650712 |
| chr7 | 24641715 | 24663721 |
| chr7 | 24641715 | 24666089 |
| chr7 | 24641715 | 24668660 |
| chr7 | 24641715 | 24680520 |
| chr7 | 24649611 | 24650712 |
| chr7 | 24649611 | 24668660 |
| chr7 | 24663589 | 24666089 |
| chr7 | 24679130 | 24680520 |
| chr7 | 24744561 | 24749793 |
| chr7 | 24804314 | 24806902 |
| chr7 | 24804314 | 24809951 |
| chr7 | 24804314 | 24834736 |
| chr7 | 24815058 | 24816688 |
| chr7 | 24815058 | 24820238 |
| chr7 | 24815058 | 24834736 |
| chr7 | 24816609 | 24849176 |
| chr7 | 24830767 | 24842413 |
| chr7 | 24830767 | 24852634 |

|      |          |          |
|------|----------|----------|
| chr7 | 24830767 | 24863599 |
| chr7 | 24834485 | 24849176 |
| chr7 | 24840689 | 24849176 |
| chr7 | 24849068 | 24861769 |
| chr7 | 24861612 | 24872069 |
| chr7 | 24861612 | 24892621 |
| chr7 | 24863199 | 24870845 |
| chr7 | 24863495 | 24872069 |
| chr7 | 24870731 | 24872069 |
| chr7 | 25142240 | 25142814 |
| chr7 | 25151595 | 25155192 |
| chr7 | 25151595 | 25158530 |
| chr7 | 25151595 | 25161260 |
| chr7 | 25151595 | 25168465 |
| chr7 | 2524694  | 2526921  |
| chr7 | 2567115  | 2572326  |
| chr7 | 2567115  | 2573488  |
| chr7 | 2567115  | 2601464  |
| chr7 | 2568953  | 2573488  |
| chr7 | 2571525  | 2572326  |
| chr7 | 26196400 | 26197732 |
| chr7 | 26196556 | 26197866 |
| chr7 | 26196806 | 26197732 |
| chr7 | 26202970 | 26208555 |
| chr7 | 2646852  | 2649988  |
| chr7 | 26670090 | 26727006 |
| chr7 | 26684735 | 26725986 |
| chr7 | 26684735 | 26727006 |
| chr7 | 26725427 | 26739964 |
| chr7 | 26844029 | 26854890 |
| chr7 | 27531191 | 27649633 |
| chr7 | 27629370 | 27632445 |
| chr7 | 27629370 | 27649633 |
| chr7 | 27769675 | 27796219 |
| chr7 | 27785162 | 27785489 |
| chr7 | 27787417 | 27800090 |
| chr7 | 27794322 | 27800090 |
| chr7 | 27796115 | 27800090 |
| chr7 | 27796115 | 27827820 |
| chr7 | 2794927  | 2814389  |
| chr7 | 29926451 | 29936721 |
| chr7 | 29926451 | 29969068 |
| chr7 | 29936555 | 29955360 |
| chr7 | 29936555 | 29969068 |
| chr7 | 29940681 | 29944179 |

|      |          |          |
|------|----------|----------|
| chr7 | 29940681 | 29955360 |
| chr7 | 29943976 | 29969068 |
| chr7 | 30018995 | 30022816 |
| chr7 | 30020212 | 30022816 |
| chr7 | 30045084 | 30049382 |
| chr7 | 30045084 | 30055342 |
| chr7 | 30045084 | 30062742 |
| chr7 | 30323641 | 30362456 |
| chr7 | 30455136 | 30457042 |
| chr7 | 30598795 | 30603572 |
| chr7 | 30598795 | 30632437 |
| chr7 | 30603033 | 30622462 |
| chr7 | 30778431 | 30782212 |
| chr7 | 30836657 | 30840848 |
| chr7 | 32543140 | 32552295 |
| chr7 | 32543140 | 32554596 |
| chr7 | 32543140 | 32558628 |
| chr7 | 32543140 | 32559464 |
| chr7 | 32544693 | 32554596 |
| chr7 | 32548846 | 32552295 |
| chr7 | 32548846 | 32554596 |
| chr7 | 32558558 | 32559464 |
| chr7 | 32570019 | 32576072 |
| chr7 | 32620403 | 32635351 |
| chr7 | 32620403 | 32639365 |
| chr7 | 32620403 | 32679130 |
| chr7 | 32632542 | 32639365 |
| chr7 | 32632542 | 32679130 |
| chr7 | 32655986 | 32679130 |
| chr7 | 32675931 | 32679130 |
| chr7 | 32974616 | 32980553 |
| chr7 | 32974616 | 32988652 |
| chr7 | 33015669 | 33026915 |
| chr7 | 33015669 | 33035988 |
| chr7 | 33017438 | 33022099 |
| chr7 | 33026816 | 33035988 |
| chr7 | 33146241 | 33155702 |
| chr7 | 33146241 | 33177591 |
| chr7 | 33344580 | 33388144 |
| chr7 | 33349067 | 33388144 |
| chr7 | 33351218 | 33367862 |
| chr7 | 33351218 | 33388144 |
| chr7 | 33357854 | 33383838 |
| chr7 | 33357854 | 33388144 |
| chr7 | 33357854 | 33534176 |

|      |          |          |
|------|----------|----------|
| chr7 | 33367766 | 33388144 |
| chr7 | 33383665 | 33388144 |
| chr7 | 33505462 | 33604975 |
| chr7 | 34078856 | 34086092 |
| chr7 | 34966893 | 34973605 |
| chr7 | 34966893 | 34989941 |
| chr7 | 34966893 | 35018596 |
| chr7 | 34969432 | 35018596 |
| chr7 | 34973513 | 35018596 |
| chr7 | 34989883 | 35018596 |
| chr7 | 35141032 | 35150274 |
| chr7 | 35638349 | 35673278 |
| chr7 | 35667433 | 35673278 |
| chr7 | 35670214 | 35673278 |
| chr7 | 35781208 | 35794022 |
| chr7 | 35863551 | 35873775 |
| chr7 | 35879822 | 35883987 |
| chr7 | 35879822 | 35885879 |
| chr7 | 35879822 | 35890793 |
| chr7 | 3619079  | 3642105  |
| chr7 | 36281114 | 36287777 |
| chr7 | 36281114 | 36297187 |
| chr7 | 36399078 | 36415884 |
| chr7 | 36406180 | 36411166 |
| chr7 | 36410513 | 36411166 |
| chr7 | 36410513 | 36420314 |
| chr7 | 36420596 | 36427028 |
| chr7 | 36423816 | 36424742 |
| chr7 | 38207446 | 38219660 |
| chr7 | 38214356 | 38219660 |
| chr7 | 38789800 | 38796864 |
| chr7 | 38789800 | 38830328 |
| chr7 | 38817816 | 38830328 |
| chr7 | 38862544 | 38869253 |
| chr7 | 39686630 | 39690590 |
| chr7 | 39686630 | 39696859 |
| chr7 | 39690381 | 39696859 |
| chr7 | 39987598 | 39997664 |
| chr7 | 39987598 | 39999500 |
| chr7 | 39987598 | 40002031 |
| chr7 | 39987598 | 40047877 |
| chr7 | 39997493 | 40002031 |
| chr7 | 39997493 | 40047877 |
| chr7 | 40045835 | 40063100 |
| chr7 | 40045835 | 40088331 |

|      |          |          |
|------|----------|----------|
| chr7 | 40062825 | 40088331 |
| chr7 | 40180946 | 40189594 |
| chr7 | 40180946 | 40237726 |
| chr7 | 4049347  | 4051830  |
| chr7 | 4049347  | 4077189  |
| chr7 | 4049347  | 4079584  |
| chr7 | 4067837  | 4079584  |
| chr7 | 4076997  | 4079584  |
| chr7 | 4174221  | 4178586  |
| chr7 | 41972336 | 41978748 |
| chr7 | 42023467 | 42026412 |
| chr7 | 42023467 | 42048696 |
| chr7 | 42040037 | 42048696 |
| chr7 | 42148225 | 42223295 |
| chr7 | 42926535 | 42927459 |
| chr7 | 43595900 | 43608400 |
| chr7 | 43595900 | 43619723 |
| chr7 | 43639448 | 43640649 |
| chr7 | 43639448 | 43645399 |
| chr7 | 43639448 | 43647634 |
| chr7 | 43881658 | 43887816 |
| chr7 | 43965866 | 43973323 |
| chr7 | 44013592 | 44014783 |
| chr7 | 44013592 | 44016523 |
| chr7 | 44014605 | 44016523 |
| chr7 | 44392296 | 44404583 |
| chr7 | 44392296 | 44427703 |
| chr7 | 44404439 | 44427703 |
| chr7 | 44404439 | 44485284 |
| chr7 | 44624316 | 44647534 |
| chr7 | 44624316 | 44647759 |
| chr7 | 44645326 | 44647759 |
| chr7 | 44666735 | 44681848 |
| chr7 | 44673786 | 44675268 |
| chr7 | 44674410 | 44675268 |
| chr7 | 44674410 | 44676149 |
| chr7 | 44674410 | 44681848 |
| chr7 | 44693824 | 44694576 |
| chr7 | 44700140 | 44701615 |
| chr7 | 44835528 | 44843354 |
| chr7 | 45736786 | 45759174 |
| chr7 | 45744996 | 45759174 |
| chr7 | 45747214 | 45751646 |
| chr7 | 45747214 | 45759174 |
| chr7 | 45751528 | 45759174 |



|      |          |          |
|------|----------|----------|
| chr7 | 45914804 | 45916667 |
| chr7 | 47291954 | 47297213 |
| chr7 | 47297081 | 47305003 |
| chr7 | 47344754 | 47346356 |
| chr7 | 47368364 | 47400914 |
| chr7 | 47396799 | 47400914 |
| chr7 | 47396799 | 47415206 |
| chr7 | 4740837  | 4755383  |
| chr7 | 4740837  | 4757187  |
| chr7 | 47435281 | 47442055 |
| chr7 | 47435281 | 47529147 |
| chr7 | 4754458  | 4757187  |
| chr7 | 4754458  | 4761288  |
| chr7 | 4756993  | 4759595  |
| chr7 | 47881908 | 47888150 |
| chr7 | 47975612 | 47978816 |
| chr7 | 47994314 | 47996146 |
| chr7 | 4815277  | 4817351  |
| chr7 | 4976300  | 4989177  |
| chr7 | 4983670  | 4989177  |
| chr7 | 5048032  | 5057779  |
| chr7 | 5057294  | 5057779  |
| chr7 | 50669721 | 50674658 |
| chr7 | 50669721 | 50703908 |
| chr7 | 50669721 | 50756056 |
| chr7 | 50674435 | 50703908 |
| chr7 | 510808   | 512455   |
| chr7 | 510808   | 517490   |
| chr7 | 51184101 | 51219944 |
| chr7 | 5199575  | 5214704  |
| chr7 | 5199575  | 5217187  |
| chr7 | 5214534  | 5218014  |
| chr7 | 5216562  | 5217187  |
| chr7 | 5287805  | 5291821  |
| chr7 | 5287808  | 5291821  |
| chr7 | 5298987  | 5300662  |
| chr7 | 5324213  | 5325248  |
| chr7 | 5324213  | 5333049  |
| chr7 | 5324213  | 5394595  |
| chr7 | 5345561  | 5352094  |
| chr7 | 5359397  | 5362825  |
| chr7 | 5374054  | 5378024  |
| chr7 | 5376846  | 5377576  |
| chr7 | 5491230  | 5505630  |
| chr7 | 55157662 | 55165437 |

|      |          |          |
|------|----------|----------|
| chr7 | 55163732 | 55165437 |
| chr7 | 55171174 | 55174820 |
| chr7 | 55172982 | 55191874 |
| chr7 | 55172982 | 55192841 |
| chr7 | 5528003  | 5529663  |
| chr7 | 55391792 | 55401320 |
| chr7 | 55391792 | 55425430 |
| chr7 | 55492281 | 55497690 |
| chr7 | 55492281 | 55521130 |
| chr7 | 55923161 | 55923699 |
| chr7 | 55978125 | 55981567 |
| chr7 | 55978125 | 55984878 |
| chr7 | 55982209 | 55983868 |
| chr7 | 55982209 | 55984878 |
| chr7 | 55982209 | 55994988 |
| chr7 | 55982209 | 55997449 |
| chr7 | 55984846 | 55997449 |
| chr7 | 5603256  | 5604030  |
| chr7 | 5603495  | 5604030  |
| chr7 | 56052421 | 56056414 |
| chr7 | 56054368 | 56056414 |
| chr7 | 56057992 | 56058702 |
| chr7 | 56057992 | 56060416 |
| chr7 | 56068481 | 56073111 |
| chr7 | 56083277 | 56083715 |
| chr7 | 5641153  | 5652510  |
| chr7 | 5641153  | 5739352  |
| chr7 | 5711760  | 5716766  |
| chr7 | 5711760  | 5730817  |
| chr7 | 5711760  | 5739352  |
| chr7 | 5712714  | 5721172  |
| chr7 | 5715052  | 5716766  |
| chr7 | 5715052  | 5725438  |
| chr7 | 5715052  | 5730817  |
| chr7 | 5721032  | 5741644  |
| chr7 | 5725323  | 5730817  |
| chr7 | 5725323  | 5741644  |
| chr7 | 5729431  | 5741644  |
| chr7 | 5729431  | 5741815  |
| chr7 | 5739275  | 5741644  |
| chr7 | 5739275  | 5741815  |
| chr7 | 579255   | 596304   |
| chr7 | 579255   | 607452   |
| chr7 | 579255   | 711527   |
| chr7 | 5901656  | 5912954  |

|      |         |         |
|------|---------|---------|
| chr7 | 596145  | 607452  |
| chr7 | 596145  | 711527  |
| chr7 | 5978595 | 5995633 |
| chr7 | 5982823 | 6002636 |
| chr7 | 5986758 | 5992057 |
| chr7 | 5991972 | 5999275 |
| chr7 | 5997325 | 6002636 |
| chr7 | 5997325 | 6006031 |
| chr7 | 6015145 | 6018045 |
| chr7 | 6026727 | 6029032 |
| chr7 | 6028614 | 6029032 |
| chr7 | 6028614 | 6050045 |
| chr7 | 6037423 | 6050045 |
| chr7 | 6040891 | 6050045 |
| chr7 | 6042932 | 6050045 |
| chr7 | 6044561 | 6050045 |
| chr7 | 6046070 | 6047091 |
| chr7 | 6046070 | 6050045 |
| chr7 | 6111124 | 6115523 |
| chr7 | 6111124 | 6135951 |
| chr7 | 6111124 | 6145656 |
| chr7 | 6111124 | 6146248 |
| chr7 | 6135840 | 6145656 |
| chr7 | 6135840 | 6147892 |
| chr7 | 6139091 | 6144196 |
| chr7 | 6139091 | 6145656 |
| chr7 | 6139091 | 6146248 |
| chr7 | 6142931 | 6145656 |
| chr7 | 6149582 | 6150506 |
| chr7 | 6170534 | 6171314 |
| chr7 | 6170534 | 6177941 |
| chr7 | 6177822 | 6187721 |
| chr7 | 6187049 | 6190531 |
| chr7 | 6387211 | 6392041 |
| chr7 | 6391923 | 6400188 |
| chr7 | 6412810 | 6416921 |
| chr7 | 6412810 | 6426114 |
| chr7 | 6416626 | 6421804 |
| chr7 | 6421726 | 6426114 |
| chr7 | 6421726 | 6430607 |
| chr7 | 6421726 | 6432959 |
| chr7 | 6421726 | 6436533 |
| chr7 | 6424751 | 6426114 |
| chr7 | 6424751 | 6436533 |
| chr7 | 6425987 | 6432959 |

|      |          |          |
|------|----------|----------|
| chr7 | 6425987  | 6435020  |
| chr7 | 6425987  | 6436533  |
| chr7 | 6430479  | 6435020  |
| chr7 | 6430479  | 6436533  |
| chr7 | 6432836  | 6435020  |
| chr7 | 6432836  | 6436533  |
| chr7 | 6432836  | 6446104  |
| chr7 | 6434761  | 6436533  |
| chr7 | 64543706 | 64544432 |
| chr7 | 6466070  | 6469754  |
| chr7 | 64691247 | 64691960 |
| chr7 | 6469595  | 6474284  |
| chr7 | 64917029 | 64918292 |
| chr7 | 65066252 | 65067050 |
| chr7 | 65726770 | 65727108 |
| chr7 | 65754526 | 65756574 |
| chr7 | 65755779 | 65756574 |
| chr7 | 65755779 | 65759998 |
| chr7 | 65757982 | 65759271 |
| chr7 | 65757982 | 65760556 |
| chr7 | 6578500  | 6585260  |
| chr7 | 6578565  | 6585260  |
| chr7 | 6580554  | 6583431  |
| chr7 | 6580554  | 6585260  |
| chr7 | 6581606  | 6582251  |
| chr7 | 6581606  | 6583431  |
| chr7 | 6591702  | 6602140  |
| chr7 | 6594434  | 6602140  |
| chr7 | 65964322 | 65967907 |
| chr7 | 65964322 | 65970366 |
| chr7 | 65964322 | 65974704 |
| chr7 | 65974294 | 65974704 |
| chr7 | 65974294 | 65975071 |
| chr7 | 65979398 | 65980409 |
| chr7 | 6599828  | 6602140  |
| chr7 | 66081802 | 66083174 |
| chr7 | 66086584 | 66087791 |
| chr7 | 66087728 | 66092086 |
| chr7 | 66088806 | 66089695 |
| chr7 | 66127703 | 66130842 |
| chr7 | 66127703 | 66134374 |
| chr7 | 66127703 | 66145500 |
| chr7 | 66130126 | 66145500 |
| chr7 | 66130743 | 66134374 |
| chr7 | 66130743 | 66145500 |

|      |          |          |
|------|----------|----------|
| chr7 | 66240324 | 66286709 |
| chr7 | 66286510 | 66356871 |
| chr7 | 6642963  | 6644593  |
| chr7 | 66541241 | 66545686 |
| chr7 | 66560578 | 66573550 |
| chr7 | 66573384 | 66576929 |
| chr7 | 66573384 | 66576932 |
| chr7 | 66768830 | 66775393 |
| chr7 | 66768830 | 66799414 |
| chr7 | 66771882 | 66775393 |
| chr7 | 66771882 | 66783841 |
| chr7 | 66771882 | 66795592 |
| chr7 | 66771882 | 66797506 |
| chr7 | 66771882 | 66799414 |
| chr7 | 66771882 | 66805396 |
| chr7 | 66775226 | 66783841 |
| chr7 | 66775226 | 66799414 |
| chr7 | 66783674 | 66799414 |
| chr7 | 66795510 | 66797506 |
| chr7 | 66795510 | 66799414 |
| chr7 | 66795510 | 66805396 |
| chr7 | 66797373 | 66799414 |
| chr7 | 66797373 | 66805396 |
| chr7 | 66799322 | 66805396 |
| chr7 | 66941847 | 66945261 |
| chr7 | 66941847 | 66948694 |
| chr7 | 66941847 | 66951135 |
| chr7 | 66944975 | 66948694 |
| chr7 | 66950951 | 66953369 |
| chr7 | 6697338  | 6697811  |
| chr7 | 6697338  | 6705223  |
| chr7 | 66991136 | 66994341 |
| chr7 | 66993216 | 66994341 |
| chr7 | 66998064 | 67018143 |
| chr7 | 67009582 | 67018143 |
| chr7 | 67009582 | 67025022 |
| chr7 | 67014366 | 67025022 |
| chr7 | 67017852 | 67055887 |
| chr7 | 67024899 | 67067403 |
| chr7 | 67024899 | 67083539 |
| chr7 | 67049948 | 67067403 |
| chr7 | 67055834 | 67067403 |
| chr7 | 67055834 | 67083539 |
| chr7 | 67055834 | 67098718 |
| chr7 | 67055834 | 67117618 |

|      |          |          |
|------|----------|----------|
| chr7 | 67067284 | 67083539 |
| chr7 | 67067284 | 67098718 |
| chr7 | 67067284 | 67117618 |
| chr7 | 67098540 | 67117618 |
| chr7 | 67183125 | 67195337 |
| chr7 | 67295617 | 67297303 |
| chr7 | 67295617 | 67299424 |
| chr7 | 67305986 | 67309715 |
| chr7 | 6735304  | 6737936  |
| chr7 | 6735304  | 6741852  |
| chr7 | 6737075  | 6741852  |
| chr7 | 6737075  | 6746188  |
| chr7 | 6741684  | 6746188  |
| chr7 | 6741684  | 6747205  |
| chr7 | 677228   | 680726   |
| chr7 | 677228   | 711527   |
| chr7 | 6804937  | 6824737  |
| chr7 | 72694686 | 72713798 |
| chr7 | 72713620 | 72728931 |
| chr7 | 72728821 | 72744601 |
| chr7 | 72830691 | 72831798 |
| chr7 | 72890626 | 72891110 |
| chr7 | 729662   | 775162   |
| chr7 | 73182076 | 73183298 |
| chr7 | 73459535 | 73463099 |
| chr7 | 73459535 | 73470483 |
| chr7 | 73462921 | 73470483 |
| chr7 | 73465438 | 73466401 |
| chr7 | 73469516 | 73470483 |
| chr7 | 73539881 | 73543644 |
| chr7 | 73686635 | 73686900 |
| chr7 | 73686635 | 73687095 |
| chr7 | 73708588 | 73709122 |
| chr7 | 740818   | 741465   |
| chr7 | 740818   | 763974   |
| chr7 | 74219743 | 74220734 |
| chr7 | 74235531 | 74249220 |
| chr7 | 74239937 | 74246763 |
| chr7 | 74239937 | 74249118 |
| chr7 | 74239937 | 74252498 |
| chr7 | 74243145 | 74249118 |
| chr7 | 74356409 | 74357477 |
| chr7 | 74397073 | 74401567 |
| chr7 | 74539878 | 74545809 |
| chr7 | 74539878 | 74547286 |

|      |          |          |
|------|----------|----------|
| chr7 | 74589850 | 74591017 |
| chr7 | 74689123 | 74716950 |
| chr7 | 74698960 | 74706433 |
| chr7 | 74705163 | 74711109 |
| chr7 | 74705163 | 74718941 |
| chr7 | 74705163 | 74728896 |
| chr7 | 74733922 | 74738103 |
| chr7 | 74884143 | 74884524 |
| chr7 | 75017597 | 75020149 |
| chr7 | 75052710 | 75057616 |
| chr7 | 75061206 | 75070769 |
| chr7 | 75066663 | 75070769 |
| chr7 | 75197947 | 75209559 |
| chr7 | 75437514 | 75441647 |
| chr7 | 754588   | 763974   |
| chr7 | 754588   | 775162   |
| chr7 | 75474703 | 75475188 |
| chr7 | 75555415 | 75558255 |
| chr7 | 75568198 | 75586833 |
| chr7 | 7583117  | 7595132  |
| chr7 | 7588497  | 7596461  |
| chr7 | 7594979  | 7596461  |
| chr7 | 75972412 | 75983636 |
| chr7 | 75987359 | 75988516 |
| chr7 | 761752   | 763974   |
| chr7 | 761752   | 770618   |
| chr7 | 76480420 | 76492253 |
| chr7 | 770470   | 775162   |
| chr7 | 770470   | 780144   |
| chr7 | 77274481 | 77280653 |
| chr7 | 77278751 | 77280653 |
| chr7 | 77376847 | 77404615 |
| chr7 | 77376847 | 77406105 |
| chr7 | 77396981 | 77406105 |
| chr7 | 774047   | 775162   |
| chr7 | 77765494 | 77773314 |
| chr7 | 77765494 | 77778446 |
| chr7 | 77920278 | 77922778 |
| chr7 | 78343777 | 78346043 |
| chr7 | 79454885 | 79458999 |
| chr7 | 8003907  | 8055549  |
| chr7 | 8003907  | 8060248  |
| chr7 | 8003907  | 8071131  |
| chr7 | 80188950 | 80203832 |
| chr7 | 80188950 | 80212869 |

|      |          |          |
|------|----------|----------|
| chr7 | 80199224 | 80203832 |
| chr7 | 80199224 | 80212869 |
| chr7 | 8022482  | 8071131  |
| chr7 | 80748897 | 80818418 |
| chr7 | 80758330 | 80810701 |
| chr7 | 80761615 | 80800826 |
| chr7 | 80761615 | 80828745 |
| chr7 | 80765154 | 80805758 |
| chr7 | 80765154 | 80828745 |
| chr7 | 80789305 | 80805758 |
| chr7 | 80789305 | 80810701 |
| chr7 | 80789305 | 80828745 |
| chr7 | 80798091 | 80805758 |
| chr7 | 80798091 | 80810701 |
| chr7 | 80798091 | 80818418 |
| chr7 | 80810610 | 80828745 |
| chr7 | 80818298 | 80828745 |
| chr7 | 81959274 | 81965665 |
| chr7 | 82032796 | 82084900 |
| chr7 | 82060427 | 82084900 |
| chr7 | 82060427 | 82117173 |
| chr7 | 82064303 | 82117173 |
| chr7 | 82117043 | 82170609 |
| chr7 | 8218304  | 8235940  |
| chr7 | 8218304  | 8236005  |
| chr7 | 82822494 | 82841509 |
| chr7 | 832504   | 842130   |
| chr7 | 832504   | 843232   |
| chr7 | 832504   | 843520   |
| chr7 | 83466481 | 83490274 |
| chr7 | 838797   | 843232   |
| chr7 | 838797   | 843520   |
| chr7 | 85006801 | 85022613 |
| chr7 | 85012781 | 85022613 |
| chr7 | 85018251 | 85037033 |
| chr7 | 85036888 | 85042285 |
| chr7 | 85036888 | 85055859 |
| chr7 | 85036888 | 85068284 |
| chr7 | 85055716 | 85068284 |
| chr7 | 85097804 | 85121931 |
| chr7 | 851383   | 861464   |
| chr7 | 851383   | 866067   |
| chr7 | 851949   | 860382   |
| chr7 | 86914722 | 86919310 |
| chr7 | 86925527 | 86942104 |



|      |          |          |
|------|----------|----------|
| chr7 | 86925527 | 86945046 |
| chr7 | 86925527 | 86947922 |
| chr7 | 86938125 | 86945046 |
| chr7 | 86938125 | 86947922 |
| chr7 | 86938125 | 86965024 |
| chr7 | 87163494 | 87165050 |
| chr7 | 87163494 | 87174669 |
| chr7 | 87164933 | 87179702 |
| chr7 | 87182227 | 87185980 |
| chr7 | 87361389 | 87377450 |
| chr7 | 87391588 | 87393067 |
| chr7 | 87739790 | 87741579 |
| chr7 | 87846948 | 87858751 |
| chr7 | 87846948 | 87860640 |
| chr7 | 87854203 | 87860640 |
| chr7 | 87878052 | 87888059 |
| chr7 | 87884978 | 87888059 |
| chr7 | 87884978 | 87897339 |
| chr7 | 87884978 | 87900878 |
| chr7 | 886055   | 887519   |
| chr7 | 886055   | 893971   |
| chr7 | 890927   | 893971   |
| chr7 | 90225049 | 90232484 |
| chr7 | 90352815 | 90355230 |
| chr7 | 90372154 | 90378211 |
| chr7 | 90372154 | 90383079 |
| chr7 | 90374301 | 90378211 |
| chr7 | 904125   | 926644   |
| chr7 | 90604217 | 90726812 |
| chr7 | 90726566 | 90747775 |
| chr7 | 90726566 | 90790652 |
| chr7 | 90726566 | 90863269 |
| chr7 | 90747680 | 90790652 |
| chr7 | 90747680 | 90863269 |
| chr7 | 90747680 | 90899353 |
| chr7 | 90747680 | 90917724 |
| chr7 | 90955696 | 90984241 |
| chr7 | 91992157 | 91993055 |
| chr7 | 919967   | 926644   |
| chr7 | 919967   | 935505   |
| chr7 | 92012428 | 92023009 |
| chr7 | 92012428 | 92031604 |
| chr7 | 92022237 | 92023009 |
| chr7 | 92040673 | 92052958 |
| chr7 | 92042667 | 92052958 |

|      |          |          |
|------|----------|----------|
| chr7 | 92117043 | 92118615 |
| chr7 | 92117043 | 92131872 |
| chr7 | 92123119 | 92131872 |
| chr7 | 92123733 | 92129056 |
| chr7 | 92126252 | 92127631 |
| chr7 | 92126252 | 92131872 |
| chr7 | 92201306 | 92222978 |
| chr7 | 92213194 | 92214777 |
| chr7 | 92213194 | 92226682 |
| chr7 | 92213194 | 92236542 |
| chr7 | 92225719 | 92234923 |
| chr7 | 92234448 | 92242137 |
| chr7 | 92294888 | 92319512 |
| chr7 | 92294888 | 92327900 |
| chr7 | 92294888 | 92343232 |
| chr7 | 92294888 | 92352642 |
| chr7 | 92294888 | 92362273 |
| chr7 | 92294888 | 92371607 |
| chr7 | 92307358 | 92362273 |
| chr7 | 92319329 | 92327900 |
| chr7 | 92319329 | 92352642 |
| chr7 | 92319329 | 92371607 |
| chr7 | 92343023 | 92352642 |
| chr7 | 92343023 | 92362273 |
| chr7 | 92343023 | 92371607 |
| chr7 | 92344977 | 92362273 |
| chr7 | 92350949 | 92362273 |
| chr7 | 92448751 | 92454685 |
| chr7 | 92489292 | 92489911 |
| chr7 | 92494486 | 92501673 |
| chr7 | 92511579 | 92513967 |
| chr7 | 92517275 | 92518255 |
| chr7 | 92517275 | 92519078 |
| chr7 | 92575770 | 92578393 |
| chr7 | 926552   | 935505   |
| chr7 | 92774695 | 92833690 |
| chr7 | 93239865 | 93253931 |
| chr7 | 93239865 | 93259632 |
| chr7 | 93252652 | 93272733 |
| chr7 | 93252652 | 93276305 |
| chr7 | 93252652 | 93311272 |
| chr7 | 93252652 | 93323732 |
| chr7 | 93253859 | 93271262 |
| chr7 | 93256508 | 93259632 |
| chr7 | 93257393 | 93259632 |

|      |          |          |
|------|----------|----------|
| chr7 | 93258356 | 93272733 |
| chr7 | 93271219 | 93297243 |
| chr7 | 93271219 | 93311272 |
| chr7 | 93276164 | 93323732 |
| chr7 | 93291702 | 93297243 |
| chr7 | 93291702 | 93311272 |
| chr7 | 93291702 | 93334197 |
| chr7 | 93303459 | 93334197 |
| chr7 | 93308823 | 93334197 |
| chr7 | 93334116 | 93341575 |
| chr7 | 94537471 | 94554575 |
| chr7 | 94549532 | 94554575 |
| chr7 | 94598774 | 94603452 |
| chr7 | 94598774 | 94628359 |
| chr7 | 94598774 | 94629841 |
| chr7 | 94618757 | 94629841 |
| chr7 | 96076056 | 96080488 |
| chr7 | 96170044 | 96193183 |
| chr7 | 96184276 | 96208977 |
| chr7 | 96277195 | 96296951 |
| chr7 | 97855352 | 97859398 |
| chr7 | 97856689 | 97869179 |
| chr7 | 98137314 | 98154876 |
| chr7 | 98137314 | 98159425 |
| chr7 | 98137314 | 98171674 |
| chr7 | 98141396 | 98159425 |
| chr7 | 98141396 | 98171674 |
| chr7 | 98185050 | 98190877 |
| chr7 | 98186876 | 98190877 |
| chr7 | 98190727 | 98194572 |
| chr7 | 98228013 | 98229166 |
| chr7 | 98230960 | 98233911 |
| chr7 | 98240850 | 98241244 |
| chr7 | 98304195 | 98320298 |
| chr7 | 98307688 | 98310592 |
| chr7 | 98881974 | 98893881 |
| chr7 | 98890334 | 98893881 |
| chr7 | 98890334 | 98897866 |
| chr7 | 98910055 | 98911271 |
| chr7 | 98912021 | 98917679 |
| chr7 | 98915722 | 98917679 |
| chr7 | 98925111 | 98927366 |
| chr7 | 98933240 | 98948685 |
| chr7 | 98937155 | 98937820 |
| chr7 | 98948220 | 98948685 |

|      |           |           |
|------|-----------|-----------|
| chr7 | 98961260  | 98962427  |
| chr7 | 98962301  | 98971945  |
| chr7 | 98964628  | 98971945  |
| chr7 | 98967040  | 98967698  |
| chr7 | 98967040  | 98971945  |
| chr7 | 98976148  | 98978904  |
| chr7 | 99030594  | 99033039  |
| chr7 | 99047683  | 99052446  |
| chr7 | 99051356  | 99057551  |
| chr7 | 99333324  | 99344515  |
| chr7 | 99333324  | 99348959  |
| chr7 | 99338180  | 99348959  |
| chr7 | 99385701  | 99394119  |
| chr7 | 99386684  | 99388261  |
| chr7 | 99386684  | 99390012  |
| chr7 | 99388038  | 99390012  |
| chr7 | 99390892  | 99391253  |
| chr7 | 99392670  | 99394119  |
| chr7 | 99403397  | 99404953  |
| chr7 | 99433277  | 99435268  |
| chr7 | 99448120  | 99450795  |
| chr7 | 99506004  | 99512591  |
| chr7 | 99512452  | 99520304  |
| chr7 | 99618524  | 99621574  |
| chr7 | 99903217  | 99908812  |
| chr7 | 99908581  | 99909660  |
| chr8 | 100184627 | 100194268 |
| chr8 | 100213089 | 100233537 |
| chr8 | 100220278 | 100231288 |
| chr8 | 100220278 | 100233537 |
| chr8 | 100220278 | 100239404 |
| chr8 | 100225172 | 100231288 |
| chr8 | 100225172 | 100233537 |
| chr8 | 100261541 | 100264195 |
| chr8 | 100264033 | 100288267 |
| chr8 | 100268784 | 100288267 |
| chr8 | 100274952 | 100288267 |
| chr8 | 100704296 | 100705673 |
| chr8 | 100704925 | 100718280 |
| chr8 | 100705588 | 100709223 |
| chr8 | 100706650 | 100706997 |
| chr8 | 100709132 | 100712789 |
| chr8 | 100709132 | 100713181 |
| chr8 | 100709132 | 100717888 |
| chr8 | 100709132 | 100718280 |

|      |           |           |
|------|-----------|-----------|
| chr8 | 100712361 | 100713181 |
| chr8 | 100712361 | 100718280 |
| chr8 | 100715461 | 100718280 |
| chr8 | 100923954 | 100925039 |
| chr8 | 10207832  | 10319989  |
| chr8 | 102212775 | 102232304 |
| chr8 | 102261145 | 102267007 |
| chr8 | 102261914 | 102264558 |
| chr8 | 102261914 | 102267007 |
| chr8 | 102261914 | 102270183 |
| chr8 | 102265099 | 102288266 |
| chr8 | 102271133 | 102272772 |
| chr8 | 102285126 | 102289576 |
| chr8 | 102311298 | 102346395 |
| chr8 | 102313803 | 102347092 |
| chr8 | 102327741 | 102329399 |
| chr8 | 102327741 | 102346395 |
| chr8 | 102329089 | 102345545 |
| chr8 | 102329089 | 102346395 |
| chr8 | 102342472 | 102345545 |
| chr8 | 102342472 | 102347092 |
| chr8 | 102342472 | 102361626 |
| chr8 | 102345395 | 102347092 |
| chr8 | 102346235 | 102361626 |
| chr8 | 102360070 | 102361206 |
| chr8 | 102360070 | 102361626 |
| chr8 | 102833055 | 102834747 |
| chr8 | 102833055 | 102836390 |
| chr8 | 102833055 | 102838916 |
| chr8 | 102833055 | 102843747 |
| chr8 | 102834188 | 102836390 |
| chr8 | 102834188 | 102838916 |
| chr8 | 102834188 | 102839823 |
| chr8 | 102836255 | 102838916 |
| chr8 | 102838743 | 102839823 |
| chr8 | 102838743 | 102843747 |
| chr8 | 102839649 | 102843747 |
| chr8 | 102843550 | 102850144 |
| chr8 | 103040797 | 103042407 |
| chr8 | 103040797 | 103055936 |
| chr8 | 103040797 | 103064811 |
| chr8 | 103048869 | 103055936 |
| chr8 | 103401515 | 103404861 |
| chr8 | 103401515 | 103407784 |
| chr8 | 103404775 | 103407784 |

|      |           |           |
|------|-----------|-----------|
| chr8 | 103420263 | 103421082 |
| chr8 | 103430611 | 103435790 |
| chr8 | 103697085 | 103766537 |
| chr8 | 103915494 | 103918487 |
| chr8 | 103916413 | 103942926 |
| chr8 | 103921671 | 103942926 |
| chr8 | 103961064 | 104014615 |
| chr8 | 104244915 | 104248813 |
| chr8 | 104499316 | 104509074 |
| chr8 | 106679209 | 106684359 |
| chr8 | 106679209 | 106692877 |
| chr8 | 10820192  | 10834775  |
| chr8 | 108203400 | 108229195 |
| chr8 | 108214606 | 108229195 |
| chr8 | 108214606 | 108241913 |
| chr8 | 108228266 | 108241913 |
| chr8 | 108229069 | 108241913 |
| chr8 | 108234997 | 108240075 |
| chr8 | 108234997 | 108241913 |
| chr8 | 108239957 | 108241913 |
| chr8 | 10826151  | 10834775  |
| chr8 | 10831664  | 10834775  |
| chr8 | 108449822 | 108450492 |
| chr8 | 108449822 | 108453147 |
| chr8 | 108449822 | 108455930 |
| chr8 | 109271004 | 109322463 |
| chr8 | 109280967 | 109289933 |
| chr8 | 11304840  | 11319838  |
| chr8 | 115619131 | 115623758 |
| chr8 | 116646470 | 116658980 |
| chr8 | 116655855 | 116658980 |
| chr8 | 116657214 | 116658980 |
| chr8 | 116657214 | 116726172 |
| chr8 | 116850617 | 116866761 |
| chr8 | 116854244 | 116856771 |
| chr8 | 116854244 | 116866761 |
| chr8 | 11748915  | 11750236  |
| chr8 | 11748918  | 11757083  |
| chr8 | 117528650 | 117530827 |
| chr8 | 117804721 | 117812961 |
| chr8 | 117818434 | 117835551 |
| chr8 | 117818434 | 117837201 |
| chr8 | 117830229 | 117837201 |
| chr8 | 117835443 | 117837201 |
| chr8 | 11808793  | 11809850  |

|      |           |           |
|------|-----------|-----------|
| chr8 | 11808793  | 11826215  |
| chr8 | 11808793  | 11831670  |
| chr8 | 11852609  | 11861479  |
| chr8 | 118621534 | 118726067 |
| chr8 | 119742533 | 119746934 |
| chr8 | 119742533 | 119762608 |
| chr8 | 119756005 | 119791459 |
| chr8 | 119758072 | 119791459 |
| chr8 | 119783380 | 119791459 |
| chr8 | 119783380 | 119806401 |
| chr8 | 119788337 | 119797846 |
| chr8 | 119788789 | 119797846 |
| chr8 | 119791323 | 119802025 |
| chr8 | 119793365 | 119802025 |
| chr8 | 119795531 | 119797846 |
| chr8 | 119795531 | 119819506 |
| chr8 | 119801793 | 119806401 |
| chr8 | 119803877 | 119806401 |
| chr8 | 119838258 | 119843747 |
| chr8 | 119838258 | 119850516 |
| chr8 | 119841793 | 119850516 |
| chr8 | 119846989 | 119853215 |
| chr8 | 119850381 | 119853215 |
| chr8 | 120413990 | 120432123 |
| chr8 | 120413990 | 120443308 |
| chr8 | 120451002 | 120490570 |
| chr8 | 120453846 | 120461255 |
| chr8 | 120453846 | 120470937 |
| chr8 | 120455434 | 120470937 |
| chr8 | 120459214 | 120470937 |
| chr8 | 120459214 | 120488332 |
| chr8 | 120459214 | 120510029 |
| chr8 | 120488158 | 120522719 |
| chr8 | 123019194 | 123025050 |
| chr8 | 123019194 | 123030716 |
| chr8 | 123021446 | 123030716 |
| chr8 | 123022683 | 123030716 |
| chr8 | 123023712 | 123030716 |
| chr8 | 123077110 | 123084340 |
| chr8 | 123077110 | 123093742 |
| chr8 | 123077110 | 123097441 |
| chr8 | 123077110 | 123101007 |
| chr8 | 123077110 | 123105464 |
| chr8 | 123077110 | 123109620 |
| chr8 | 123077110 | 123120188 |

|      |           |           |
|------|-----------|-----------|
| chr8 | 123077110 | 123128513 |
| chr8 | 123084161 | 123097441 |
| chr8 | 123084161 | 123128513 |
| chr8 | 123093590 | 123097441 |
| chr8 | 123093590 | 123105464 |
| chr8 | 123105287 | 123109620 |
| chr8 | 123109316 | 123120188 |
| chr8 | 123120054 | 123134206 |
| chr8 | 123126055 | 123126687 |
| chr8 | 123129065 | 123130333 |
| chr8 | 123134113 | 123144855 |
| chr8 | 123226499 | 123231757 |
| chr8 | 123226499 | 123239144 |
| chr8 | 123231299 | 123239144 |
| chr8 | 123253321 | 123267386 |
| chr8 | 123322937 | 123328579 |
| chr8 | 123322937 | 123339446 |
| chr8 | 123322937 | 123348273 |
| chr8 | 123325892 | 123336532 |
| chr8 | 123325892 | 123337821 |
| chr8 | 123328189 | 123336532 |
| chr8 | 123328189 | 123337821 |
| chr8 | 123333877 | 123336532 |
| chr8 | 123333877 | 123337821 |
| chr8 | 123333877 | 123339446 |
| chr8 | 123344883 | 123348273 |
| chr8 | 123344883 | 123349444 |
| chr8 | 123344883 | 123361646 |
| chr8 | 123356388 | 123359685 |
| chr8 | 123356388 | 123361646 |
| chr8 | 123356388 | 123370024 |
| chr8 | 123359220 | 123361646 |
| chr8 | 123359576 | 123371338 |
| chr8 | 123370902 | 123371835 |
| chr8 | 123778024 | 123806229 |
| chr8 | 123786494 | 123789745 |
| chr8 | 123798089 | 123810351 |
| chr8 | 124320085 | 124327421 |
| chr8 | 124320085 | 124330792 |
| chr8 | 124493832 | 124516030 |
| chr8 | 124495471 | 124516030 |
| chr8 | 124504270 | 124516030 |
| chr8 | 124504270 | 124523002 |
| chr8 | 124508473 | 124516030 |
| chr8 | 124508473 | 124522200 |



|      |           |           |
|------|-----------|-----------|
| chr8 | 124515745 | 124522200 |
| chr8 | 125003175 | 125007487 |
| chr8 | 125007390 | 125009343 |
| chr8 | 125008970 | 125009343 |
| chr8 | 125044535 | 125063651 |
| chr8 | 125049005 | 125050665 |
| chr8 | 125049005 | 125057666 |
| chr8 | 125078737 | 125082467 |
| chr8 | 125102050 | 125182256 |
| chr8 | 125151170 | 125182256 |
| chr8 | 125357218 | 125357818 |
| chr8 | 127939507 | 127989291 |
| chr8 | 128070159 | 128096654 |
| chr8 | 129846803 | 129862334 |
| chr8 | 129846803 | 129871496 |
| chr8 | 129852161 | 129862334 |
| chr8 | 129855610 | 129862334 |
| chr8 | 129855610 | 129879471 |
| chr8 | 129862228 | 129871496 |
| chr8 | 129871374 | 129903350 |
| chr8 | 129871374 | 129904585 |
| chr8 | 130057953 | 130061069 |
| chr8 | 130057953 | 130092143 |
| chr8 | 130060578 | 130076406 |
| chr8 | 130076347 | 130092143 |
| chr8 | 130076347 | 130126089 |
| chr8 | 130079901 | 130092143 |
| chr8 | 130091972 | 130112322 |
| chr8 | 130091972 | 130126089 |
| chr8 | 130112093 | 130118675 |
| chr8 | 130112093 | 130180880 |
| chr8 | 130116879 | 130128090 |
| chr8 | 130118160 | 130126089 |
| chr8 | 130134295 | 130169067 |
| chr8 | 130134295 | 130180880 |
| chr8 | 130136950 | 130169067 |
| chr8 | 130152735 | 130169067 |
| chr8 | 130152735 | 130180880 |
| chr8 | 130152735 | 130187285 |
| chr8 | 130159863 | 130169067 |
| chr8 | 130159863 | 130180880 |
| chr8 | 130159863 | 130187285 |
| chr8 | 130159863 | 130358143 |
| chr8 | 130167535 | 130187285 |
| chr8 | 130179263 | 130180880 |

|      |           |           |
|------|-----------|-----------|
| chr8 | 130179263 | 130187285 |
| chr8 | 130179263 | 130188183 |
| chr8 | 130179263 | 130358143 |
| chr8 | 130180750 | 130214701 |
| chr8 | 130187235 | 130358143 |
| chr8 | 130214555 | 130236994 |
| chr8 | 130214555 | 130358143 |
| chr8 | 130214555 | 130361771 |
| chr8 | 130214555 | 130401970 |
| chr8 | 130236921 | 130358143 |
| chr8 | 130236921 | 130361771 |
| chr8 | 130358016 | 130361771 |
| chr8 | 130358016 | 130401970 |
| chr8 | 13088486  | 13092825  |
| chr8 | 13091317  | 13092825  |
| chr8 | 13094758  | 13100770  |
| chr8 | 131940498 | 131946633 |
| chr8 | 131940498 | 131950090 |
| chr8 | 131940498 | 131955905 |
| chr8 | 131940498 | 131959663 |
| chr8 | 131940498 | 131970643 |
| chr8 | 131940498 | 131979019 |
| chr8 | 131949968 | 131955905 |
| chr8 | 131949968 | 131959663 |
| chr8 | 131949968 | 131970643 |
| chr8 | 132583693 | 132638107 |
| chr8 | 132622610 | 132661627 |
| chr8 | 132656829 | 132661627 |
| chr8 | 132722039 | 132757294 |
| chr8 | 132777791 | 132794817 |
| chr8 | 132777791 | 132804740 |
| chr8 | 132777791 | 132814889 |
| chr8 | 132777795 | 132794581 |
| chr8 | 132777795 | 132798860 |
| chr8 | 132794409 | 132798860 |
| chr8 | 132836539 | 132842875 |
| chr8 | 132836539 | 132844318 |
| chr8 | 134509618 | 134521001 |
| chr8 | 134509618 | 134590355 |
| chr8 | 134565332 | 134590355 |
| chr8 | 134583831 | 134590355 |
| chr8 | 134583831 | 134610655 |
| chr8 | 134600435 | 134610655 |
| chr8 | 134608728 | 134610655 |
| chr8 | 135521236 | 135548900 |

|      |           |           |
|------|-----------|-----------|
| chr8 | 135521236 | 135557587 |
| chr8 | 135521236 | 135582073 |
| chr8 | 135542653 | 135548900 |
| chr8 | 135542653 | 135557587 |
| chr8 | 135542653 | 135582073 |
| chr8 | 135542653 | 135607037 |
| chr8 | 139885878 | 139910300 |
| chr8 | 139885878 | 140024079 |
| chr8 | 139988725 | 140024079 |
| chr8 | 139988725 | 140252929 |
| chr8 | 140023936 | 140252929 |
| chr8 | 140221458 | 140252929 |
| chr8 | 140252776 | 140291078 |
| chr8 | 140275657 | 140287734 |
| chr8 | 140275657 | 140291078 |
| chr8 | 140275657 | 140300614 |
| chr8 | 140275657 | 140311374 |
| chr8 | 140283888 | 140287734 |
| chr8 | 140290992 | 140360193 |
| chr8 | 140290992 | 140426641 |
| chr8 | 140300468 | 140311374 |
| chr8 | 140300468 | 140360193 |
| chr8 | 140300468 | 140426641 |
| chr8 | 140360049 | 140405698 |
| chr8 | 140397619 | 140405698 |
| chr8 | 140397619 | 140426641 |
| chr8 | 140397619 | 140439197 |
| chr8 | 140539319 | 140541358 |
| chr8 | 140549113 | 140551436 |
| chr8 | 140551302 | 140585311 |
| chr8 | 140555895 | 140585311 |
| chr8 | 140562452 | 140585311 |
| chr8 | 140572811 | 140585311 |
| chr8 | 140664916 | 140674404 |
| chr8 | 140668268 | 140674404 |
| chr8 | 140668268 | 140706205 |
| chr8 | 140674297 | 140686694 |
| chr8 | 140674297 | 140706205 |
| chr8 | 140674297 | 140752316 |
| chr8 | 140675429 | 140706205 |
| chr8 | 140686631 | 140706205 |
| chr8 | 140686631 | 140752316 |
| chr8 | 140700890 | 140702707 |
| chr8 | 140700890 | 140706205 |
| chr8 | 140700890 | 140717709 |

|      |           |           |
|------|-----------|-----------|
| chr8 | 140700890 | 140743330 |
| chr8 | 140700890 | 140746860 |
| chr8 | 140700890 | 140752316 |
| chr8 | 140717597 | 140752316 |
| chr8 | 140735250 | 140739107 |
| chr8 | 140735250 | 140744767 |
| chr8 | 140735250 | 140746860 |
| chr8 | 140735250 | 140752316 |
| chr8 | 140735250 | 140761262 |
| chr8 | 140735250 | 140764290 |
| chr8 | 140739017 | 140752316 |
| chr8 | 140743229 | 140746860 |
| chr8 | 140746759 | 140761262 |
| chr8 | 140746759 | 140764290 |
| chr8 | 140752231 | 140846678 |
| chr8 | 140752231 | 140890769 |
| chr8 | 140761164 | 140789526 |
| chr8 | 140761164 | 140793384 |
| chr8 | 140761164 | 140800576 |
| chr8 | 140761164 | 140803650 |
| chr8 | 140761164 | 140819020 |
| chr8 | 140761164 | 140864399 |
| chr8 | 140764233 | 140803650 |
| chr8 | 140789473 | 140803650 |
| chr8 | 140789473 | 140819020 |
| chr8 | 140789473 | 140830526 |
| chr8 | 140789473 | 140846678 |
| chr8 | 140789473 | 140864399 |
| chr8 | 140789473 | 140879637 |
| chr8 | 140789473 | 140890769 |
| chr8 | 140793353 | 140830526 |
| chr8 | 140793353 | 140846678 |
| chr8 | 140793353 | 140864399 |
| chr8 | 140793353 | 140879637 |
| chr8 | 140793353 | 140890769 |
| chr8 | 140800458 | 140803650 |
| chr8 | 140800458 | 140819020 |
| chr8 | 140800458 | 140830526 |
| chr8 | 140800458 | 140864399 |
| chr8 | 140800458 | 140879637 |
| chr8 | 140800458 | 140890769 |
| chr8 | 140800458 | 140925749 |
| chr8 | 140818276 | 140819020 |
| chr8 | 140818276 | 140830526 |
| chr8 | 140818276 | 140846678 |

|      |           |           |
|------|-----------|-----------|
| chr8 | 140818276 | 140864399 |
| chr8 | 140818276 | 140879637 |
| chr8 | 140818276 | 140890769 |
| chr8 | 140818276 | 140925749 |
| chr8 | 140830471 | 140864399 |
| chr8 | 140830471 | 140879637 |
| chr8 | 140830471 | 140890769 |
| chr8 | 140830471 | 140925749 |
| chr8 | 140846259 | 140864399 |
| chr8 | 140846259 | 140879637 |
| chr8 | 140846259 | 140890769 |
| chr8 | 140846259 | 140925749 |
| chr8 | 140846598 | 140879637 |
| chr8 | 140846598 | 140890769 |
| chr8 | 140864311 | 140879637 |
| chr8 | 140864311 | 140890769 |
| chr8 | 140864311 | 140925749 |
| chr8 | 140879470 | 140890769 |
| chr8 | 140879470 | 140925749 |
| chr8 | 140890542 | 140925749 |
| chr8 | 141136557 | 141138137 |
| chr8 | 141150833 | 141155970 |
| chr8 | 141155848 | 141163429 |
| chr8 | 141155848 | 141168525 |
| chr8 | 141155848 | 141185278 |
| chr8 | 141160631 | 141163429 |
| chr8 | 141175199 | 141178196 |
| chr8 | 141175199 | 141180854 |
| chr8 | 141176590 | 141185278 |
| chr8 | 141185138 | 141190417 |
| chr8 | 141215758 | 141221765 |
| chr8 | 141421387 | 141425140 |
| chr8 | 142300485 | 142315089 |
| chr8 | 142300485 | 142318634 |
| chr8 | 142318543 | 142331831 |
| chr8 | 142330900 | 142345892 |
| chr8 | 142343965 | 142345892 |
| chr8 | 143465716 | 143475585 |
| chr8 | 143580011 | 143586849 |
| chr8 | 143688661 | 143690123 |
| chr8 | 143689203 | 143690123 |
| chr8 | 143792484 | 143795530 |
| chr8 | 143935197 | 143938692 |
| chr8 | 143935847 | 143938692 |
| chr8 | 143937164 | 143938692 |

|      |           |           |
|------|-----------|-----------|
| chr8 | 143991199 | 143991804 |
| chr8 | 144096123 | 144097134 |
| chr8 | 144098865 | 144103225 |
| chr8 | 144105639 | 144106963 |
| chr8 | 144190783 | 144200541 |
| chr8 | 144262395 | 144265071 |
| chr8 | 144263477 | 144263911 |
| chr8 | 144263830 | 144264142 |
| chr8 | 144309454 | 144314054 |
| chr8 | 144356599 | 144356915 |
| chr8 | 144510597 | 144510903 |
| chr8 | 144512391 | 144512771 |
| chr8 | 144533125 | 144534202 |
| chr8 | 144555559 | 144581277 |
| chr8 | 144791772 | 144792140 |
| chr8 | 144802869 | 144804238 |
| chr8 | 144994478 | 144999769 |
| chr8 | 15623079  | 15662296  |
| chr8 | 15623079  | 15673836  |
| chr8 | 15623079  | 15743612  |
| chr8 | 15650696  | 15673836  |
| chr8 | 1565682   | 1626887   |
| chr8 | 1565682   | 1633046   |
| chr8 | 15659506  | 15673836  |
| chr8 | 15730665  | 15748465  |
| chr8 | 17064083  | 17081740  |
| chr8 | 17064083  | 17090584  |
| chr8 | 17077782  | 17090584  |
| chr8 | 17237211  | 17245247  |
| chr8 | 17242991  | 17245247  |
| chr8 | 17265906  | 17268956  |
| chr8 | 17265906  | 17276467  |
| chr8 | 17265906  | 17284616  |
| chr8 | 17265906  | 17286427  |
| chr8 | 17280374  | 17286427  |
| chr8 | 17284472  | 17286427  |
| chr8 | 17331149  | 17349081  |
| chr8 | 17341362  | 17349081  |
| chr8 | 17558294  | 17562110  |
| chr8 | 17743603  | 17755961  |
| chr8 | 17950614  | 17953186  |
| chr8 | 17963100  | 17967170  |
| chr8 | 17963100  | 17969748  |
| chr8 | 17980590  | 18011827  |
| chr8 | 17989858  | 17993619  |

|      |          |          |
|------|----------|----------|
| chr8 | 17989858 | 18014840 |
| chr8 | 18009546 | 18014840 |
| chr8 | 18011236 | 18011827 |
| chr8 | 1843352  | 1860184  |
| chr8 | 1843352  | 1869250  |
| chr8 | 1843352  | 1885707  |
| chr8 | 1843352  | 1909470  |
| chr8 | 18572527 | 18632806 |
| chr8 | 1857959  | 1869250  |
| chr8 | 1866525  | 1894572  |
| chr8 | 18765448 | 18804898 |
| chr8 | 1876570  | 1885707  |
| chr8 | 18867673 | 18872733 |
| chr8 | 1893568  | 1905716  |
| chr8 | 1903280  | 1909470  |
| chr8 | 19364071 | 19373660 |
| chr8 | 19819572 | 19837160 |
| chr8 | 19823300 | 19826559 |
| chr8 | 19824802 | 19830559 |
| chr8 | 20209432 | 20212905 |
| chr8 | 20210345 | 20211316 |
| chr8 | 22072325 | 22073835 |
| chr8 | 22248480 | 22249309 |
| chr8 | 22404695 | 22408496 |
| chr8 | 22474953 | 22475624 |
| chr8 | 22474953 | 22498112 |
| chr8 | 22474953 | 22513432 |
| chr8 | 22528505 | 22533018 |
| chr8 | 22605735 | 22607325 |
| chr8 | 22606084 | 22608065 |
| chr8 | 23027132 | 23029721 |
| chr8 | 23199265 | 23202761 |
| chr8 | 23302026 | 23303397 |
| chr8 | 23302026 | 23309911 |
| chr8 | 23309667 | 23320052 |
| chr8 | 23566107 | 23568378 |
| chr8 | 25275385 | 25366970 |
| chr8 | 25298943 | 25300657 |
| chr8 | 25298943 | 25310532 |
| chr8 | 25308782 | 25317131 |
| chr8 | 25332250 | 25334196 |
| chr8 | 25340876 | 25345611 |
| chr8 | 25366869 | 25369641 |
| chr8 | 25366869 | 25372718 |
| chr8 | 25407982 | 25408940 |

|      |          |          |
|------|----------|----------|
| chr8 | 25460383 | 25462208 |
| chr8 | 25460383 | 25469980 |
| chr8 | 25462053 | 25488689 |
| chr8 | 25483398 | 25484210 |
| chr8 | 26360168 | 26363890 |
| chr8 | 26581968 | 26583983 |
| chr8 | 27775498 | 27784057 |
| chr8 | 27822318 | 27833133 |
| chr8 | 28106712 | 28113173 |
| chr8 | 28129501 | 28137891 |
| chr8 | 28137697 | 28162078 |
| chr8 | 28155941 | 28162078 |
| chr8 | 28520637 | 28528164 |
| chr8 | 28713456 | 28718207 |
| chr8 | 28731222 | 28743214 |
| chr8 | 28835291 | 28837776 |
| chr8 | 28835291 | 28859563 |
| chr8 | 28846746 | 28859563 |
| chr8 | 28963810 | 28970519 |
| chr8 | 28963810 | 28980156 |
| chr8 | 28970042 | 28980156 |
| chr8 | 28970042 | 29009182 |
| chr8 | 28980070 | 29018913 |
| chr8 | 29148576 | 29155856 |
| chr8 | 30101897 | 30104486 |
| chr8 | 30607056 | 30614715 |
| chr8 | 30680903 | 30684199 |
| chr8 | 30684087 | 30693055 |
| chr8 | 30684087 | 30700135 |
| chr8 | 30689160 | 30693055 |
| chr8 | 30696379 | 30703240 |
| chr8 | 30700080 | 30703240 |
| chr8 | 30700080 | 30708141 |
| chr8 | 30700080 | 30712088 |
| chr8 | 30791196 | 30799755 |
| chr8 | 31087775 | 31091898 |
| chr8 | 31141429 | 31150455 |
| chr8 | 31147052 | 31150455 |
| chr8 | 32595827 | 32616885 |
| chr8 | 33453215 | 33461725 |
| chr8 | 33488377 | 33489139 |
| chr8 | 33495541 | 33497297 |
| chr8 | 37765525 | 37766355 |
| chr8 | 37835173 | 37837939 |
| chr8 | 37870419 | 37877551 |



|      |          |          |
|------|----------|----------|
| chr8 | 38114191 | 38119363 |
| chr8 | 38114191 | 38121149 |
| chr8 | 38114191 | 38128951 |
| chr8 | 38114191 | 38135766 |
| chr8 | 38128290 | 38128951 |
| chr8 | 38242249 | 38253718 |
| chr8 | 38247712 | 38253718 |
| chr8 | 38290474 | 38299590 |
| chr8 | 38314646 | 38316042 |
| chr8 | 38337304 | 38338607 |
| chr8 | 38337304 | 38348215 |
| chr8 | 38424508 | 38426245 |
| chr8 | 38788703 | 38820635 |
| chr8 | 38825307 | 38831177 |
| chr8 | 38825307 | 38836287 |
| chr8 | 38836161 | 38840267 |
| chr8 | 38917906 | 38946221 |
| chr8 | 38946123 | 38957386 |
| chr8 | 39007885 | 39018918 |
| chr8 | 39007885 | 39026810 |
| chr8 | 39021642 | 39023325 |
| chr8 | 39054480 | 39055772 |
| chr8 | 39054480 | 39083073 |
| chr8 | 39077227 | 39083073 |
| chr8 | 39077227 | 39091346 |
| chr8 | 39090046 | 39091346 |
| chr8 | 39136656 | 39169997 |
| chr8 | 39136656 | 39187045 |
| chr8 | 39147129 | 39165196 |
| chr8 | 39221609 | 39257343 |
| chr8 | 41530183 | 41537293 |
| chr8 | 41530183 | 41541899 |
| chr8 | 41609415 | 41610810 |
| chr8 | 41609415 | 41611992 |
| chr8 | 41609415 | 41612273 |
| chr8 | 41609415 | 41612960 |
| chr8 | 41611902 | 41612273 |
| chr8 | 41611902 | 41615048 |
| chr8 | 41955295 | 41987563 |
| chr8 | 41974703 | 41978777 |
| chr8 | 41974703 | 41987563 |
| chr8 | 41980845 | 41987563 |
| chr8 | 42185080 | 42189071 |
| chr8 | 42185080 | 42191414 |
| chr8 | 42325969 | 42329214 |

|      |          |          |
|------|----------|----------|
| chr8 | 42344952 | 42350065 |
| chr8 | 42344952 | 42352568 |
| chr8 | 42344952 | 42357392 |
| chr8 | 42350006 | 42361365 |
| chr8 | 42350006 | 42362698 |
| chr8 | 42352518 | 42362698 |
| chr8 | 42355515 | 42361365 |
| chr8 | 42394209 | 42403461 |
| chr8 | 42398711 | 42403461 |
| chr8 | 42401787 | 42403461 |
| chr8 | 42428757 | 42430249 |
| chr8 | 42436988 | 42444762 |
| chr8 | 42439449 | 42465917 |
| chr8 | 42439449 | 42472654 |
| chr8 | 42459895 | 42465917 |
| chr8 | 42459895 | 42472654 |
| chr8 | 42463004 | 42472654 |
| chr8 | 42861744 | 42870112 |
| chr8 | 42861744 | 42874006 |
| chr8 | 42861744 | 42887871 |
| chr8 | 42870003 | 42874006 |
| chr8 | 42870003 | 42887871 |
| chr8 | 42906172 | 42930172 |
| chr8 | 42906172 | 42943445 |
| chr8 | 42906172 | 42950455 |
| chr8 | 42906172 | 42959314 |
| chr8 | 42906172 | 42964474 |
| chr8 | 42906172 | 42982696 |
| chr8 | 42906172 | 42986795 |
| chr8 | 42906172 | 42997637 |
| chr8 | 42925556 | 42943445 |
| chr8 | 42925556 | 42950455 |
| chr8 | 42925556 | 42959314 |
| chr8 | 42925556 | 42964474 |
| chr8 | 42925556 | 42982696 |
| chr8 | 42943312 | 42966613 |
| chr8 | 42943312 | 42982696 |
| chr8 | 42950387 | 42959314 |
| chr8 | 42950387 | 42964474 |
| chr8 | 42950387 | 42968214 |
| chr8 | 42950387 | 42974194 |
| chr8 | 42950387 | 42997637 |
| chr8 | 42957093 | 42964474 |
| chr8 | 42957093 | 42974194 |
| chr8 | 42964310 | 42966613 |

|      |          |          |
|------|----------|----------|
| chr8 | 42964310 | 42968214 |
| chr8 | 42966472 | 42968214 |
| chr8 | 42968012 | 42982696 |
| chr8 | 42973288 | 42974194 |
| chr8 | 42973288 | 42986795 |
| chr8 | 42982626 | 43010405 |
| chr8 | 43002106 | 43013400 |
| chr8 | 43007846 | 43013400 |
| chr8 | 43010304 | 43013400 |
| chr8 | 43059091 | 43064215 |
| chr8 | 43059091 | 43069659 |
| chr8 | 43059091 | 43072307 |
| chr8 | 43059091 | 43077364 |
| chr8 | 43064100 | 43072307 |
| chr8 | 43064100 | 43077364 |
| chr8 | 43069554 | 43072307 |
| chr8 | 43069554 | 43084881 |
| chr8 | 43097523 | 43103830 |
| chr8 | 431340   | 435707   |
| chr8 | 43146947 | 43159044 |
| chr8 | 43146947 | 43161507 |
| chr8 | 43158574 | 43169242 |
| chr8 | 43158574 | 43172386 |
| chr8 | 43158574 | 43173743 |
| chr8 | 47279861 | 47291137 |
| chr8 | 47279861 | 47294030 |
| chr8 | 47279861 | 47407961 |
| chr8 | 47279861 | 47440542 |
| chr8 | 47279861 | 47599196 |
| chr8 | 47284027 | 47294030 |
| chr8 | 47291032 | 47294030 |
| chr8 | 47293866 | 47407961 |
| chr8 | 47396375 | 47407961 |
| chr8 | 47396375 | 47440542 |
| chr8 | 47407860 | 47440542 |
| chr8 | 47595810 | 47599196 |
| chr8 | 47595810 | 47713641 |
| chr8 | 47700402 | 47701864 |
| chr8 | 47700402 | 47702015 |
| chr8 | 47712661 | 47713641 |
| chr8 | 47776843 | 47783809 |
| chr8 | 47782161 | 47794501 |
| chr8 | 47783741 | 47785317 |
| chr8 | 47783741 | 47798397 |
| chr8 | 47785112 | 47794501 |

|      |          |          |
|------|----------|----------|
| chr8 | 47785112 | 47798397 |
| chr8 | 47794289 | 47798397 |
| chr8 | 47794289 | 47807326 |
| chr8 | 47798236 | 47807326 |
| chr8 | 47798236 | 47904976 |
| chr8 | 47799209 | 47807326 |
| chr8 | 47800792 | 47819510 |
| chr8 | 47817449 | 47831926 |
| chr8 | 47840015 | 47854214 |
| chr8 | 47849153 | 47852784 |
| chr8 | 47852672 | 47854214 |
| chr8 | 47852672 | 47855373 |
| chr8 | 47852672 | 47858635 |
| chr8 | 47859610 | 47864763 |
| chr8 | 47877723 | 47879658 |
| chr8 | 47877723 | 47886147 |
| chr8 | 47885943 | 47897294 |
| chr8 | 47887546 | 47893387 |
| chr8 | 47888517 | 47893387 |
| chr8 | 47897160 | 47904976 |
| chr8 | 47900372 | 47904976 |
| chr8 | 47900372 | 47930012 |
| chr8 | 47902568 | 47912562 |
| chr8 | 47912409 | 47915418 |
| chr8 | 47912409 | 47954446 |
| chr8 | 47918276 | 47927890 |
| chr8 | 47918276 | 47930012 |
| chr8 | 47927193 | 47927890 |
| chr8 | 47927193 | 47930012 |
| chr8 | 47927193 | 47930787 |
| chr8 | 47927193 | 47936517 |
| chr8 | 47927193 | 47939697 |
| chr8 | 47930671 | 47934090 |
| chr8 | 47930671 | 47935058 |
| chr8 | 47933019 | 47935058 |
| chr8 | 47933019 | 47936517 |
| chr8 | 47933019 | 47939697 |
| chr8 | 47933019 | 47954446 |
| chr8 | 47935008 | 47936517 |
| chr8 | 47943208 | 47944029 |
| chr8 | 47953619 | 47953919 |
| chr8 | 47953619 | 47954446 |
| chr8 | 47953619 | 47957431 |
| chr8 | 47954337 | 47957431 |
| chr8 | 47957170 | 47957431 |

|      |          |          |
|------|----------|----------|
| chr8 | 47969797 | 47971468 |
| chr8 | 47970510 | 47971468 |
| chr8 | 48043032 | 48049978 |
| chr8 | 492458   | 494597   |
| chr8 | 51845660 | 51861246 |
| chr8 | 52661534 | 52668191 |
| chr8 | 52683548 | 52686967 |
| chr8 | 53743576 | 53772167 |
| chr8 | 53743576 | 53829533 |
| chr8 | 53756554 | 53772167 |
| chr8 | 53769617 | 53772167 |
| chr8 | 53795646 | 53801896 |
| chr8 | 53795646 | 53817530 |
| chr8 | 53795646 | 53829533 |
| chr8 | 53811163 | 53829533 |
| chr8 | 53946664 | 53954310 |
| chr8 | 53978522 | 53979171 |
| chr8 | 53979024 | 54010492 |
| chr8 | 53984362 | 54000050 |
| chr8 | 53984362 | 54003092 |
| chr8 | 53993667 | 54000050 |
| chr8 | 53993667 | 54010492 |
| chr8 | 55750963 | 55756411 |
| chr8 | 55750963 | 55763980 |
| chr8 | 55782747 | 55790299 |
| chr8 | 55782747 | 55805036 |
| chr8 | 55795977 | 55805036 |
| chr8 | 55802456 | 55805036 |
| chr8 | 55941854 | 55947723 |
| chr8 | 55941854 | 55953984 |
| chr8 | 55946447 | 55966897 |
| chr8 | 55950458 | 55952115 |
| chr8 | 55950458 | 55953984 |
| chr8 | 55950458 | 55969793 |
| chr8 | 55966714 | 55969793 |
| chr8 | 56978049 | 56980197 |
| chr8 | 58416849 | 58439770 |
| chr8 | 58430518 | 58434504 |
| chr8 | 58585651 | 58590934 |
| chr8 | 58589451 | 58590934 |
| chr8 | 58601284 | 58603386 |
| chr8 | 58623219 | 58635546 |
| chr8 | 58623219 | 58643073 |
| chr8 | 60558851 | 60591969 |
| chr8 | 60572045 | 60591969 |

|      |          |          |
|------|----------|----------|
| chr8 | 60584207 | 60591969 |
| chr8 | 60780999 | 60808272 |
| chr8 | 60794985 | 60800525 |
| chr8 | 60794985 | 60801593 |
| chr8 | 60794985 | 60808272 |
| chr8 | 60800387 | 60808272 |
| chr8 | 60816386 | 60822145 |
| chr8 | 60816386 | 60824016 |
| chr8 | 60820006 | 60822145 |
| chr8 | 60820006 | 60824016 |
| chr8 | 61517527 | 61526112 |
| chr8 | 61525976 | 61556022 |
| chr8 | 61525976 | 61576858 |
| chr8 | 61548070 | 61556022 |
| chr8 | 61567167 | 61576858 |
| chr8 | 61567167 | 61584029 |
| chr8 | 61567167 | 61619019 |
| chr8 | 61633682 | 61644632 |
| chr8 | 61633682 | 61653660 |
| chr8 | 61637946 | 61646878 |
| chr8 | 61637946 | 61653660 |
| chr8 | 61637946 | 61684188 |
| chr8 | 61642887 | 61684188 |
| chr8 | 61643944 | 61681036 |
| chr8 | 61644599 | 61681036 |
| chr8 | 61644599 | 61684188 |
| chr8 | 61651049 | 61684188 |
| chr8 | 61680967 | 61684188 |
| chr8 | 61682438 | 61684188 |
| chr8 | 63017492 | 63030217 |
| chr8 | 63175330 | 63187745 |
| chr8 | 6455142  | 6499929  |
| chr8 | 6477593  | 6499929  |
| chr8 | 65613243 | 65627433 |
| chr8 | 65669872 | 65682451 |
| chr8 | 65669872 | 65693759 |
| chr8 | 65669872 | 65704929 |
| chr8 | 65669872 | 65708011 |
| chr8 | 65693643 | 65704929 |
| chr8 | 65723540 | 65745470 |
| chr8 | 65734793 | 65745470 |
| chr8 | 65734793 | 65782843 |
| chr8 | 66566683 | 66573506 |
| chr8 | 66572481 | 66573506 |
| chr8 | 66572481 | 66576375 |

|      |          |          |
|------|----------|----------|
| chr8 | 66572481 | 66580366 |
| chr8 | 66592439 | 66602523 |
| chr8 | 66595582 | 66602523 |
| chr8 | 66599049 | 66602523 |
| chr8 | 66601697 | 66602523 |
| chr8 | 66793615 | 66798625 |
| chr8 | 66793615 | 66804447 |
| chr8 | 66793615 | 66813928 |
| chr8 | 66804374 | 66822459 |
| chr8 | 66804374 | 66836074 |
| chr8 | 66813852 | 66831311 |
| chr8 | 66828653 | 66840247 |
| chr8 | 66835762 | 66836074 |
| chr8 | 66835762 | 66840247 |
| chr8 | 67045811 | 67059445 |
| chr8 | 67074242 | 67076581 |
| chr8 | 67074242 | 67086110 |
| chr8 | 67076481 | 67095732 |
| chr8 | 67086006 | 67095732 |
| chr8 | 67093542 | 67095732 |
| chr8 | 67093542 | 67112065 |
| chr8 | 67095292 | 67113862 |
| chr8 | 67103036 | 67116122 |
| chr8 | 67103036 | 67118821 |
| chr8 | 67103036 | 67132080 |
| chr8 | 67103036 | 67137603 |
| chr8 | 67105904 | 67112065 |
| chr8 | 67105904 | 67116122 |
| chr8 | 67105904 | 67118821 |
| chr8 | 67105904 | 67137603 |
| chr8 | 67111971 | 67118821 |
| chr8 | 67111971 | 67137603 |
| chr8 | 67113804 | 67132080 |
| chr8 | 67115913 | 67118821 |
| chr8 | 67115913 | 67132080 |
| chr8 | 67118742 | 67137603 |
| chr8 | 67131950 | 67137603 |
| chr8 | 67131950 | 67154136 |
| chr8 | 67149782 | 67164508 |
| chr8 | 67154023 | 67159137 |
| chr8 | 67161810 | 67164508 |
| chr8 | 67164390 | 67179926 |
| chr8 | 67172415 | 67177726 |
| chr8 | 67175295 | 67190759 |
| chr8 | 67238342 | 67238893 |

|      |          |          |
|------|----------|----------|
| chr8 | 6724869  | 6732650  |
| chr8 | 6724869  | 6747828  |
| chr8 | 67257731 | 67288065 |
| chr8 | 67259814 | 67277457 |
| chr8 | 67266005 | 67277457 |
| chr8 | 67275975 | 67288065 |
| chr8 | 67291846 | 67301380 |
| chr8 | 67299208 | 67301380 |
| chr8 | 67299208 | 67302466 |
| chr8 | 6730710  | 6732650  |
| chr8 | 6730710  | 6741751  |
| chr8 | 69755423 | 69761875 |
| chr8 | 70121301 | 70144848 |
| chr8 | 70123883 | 70124865 |
| chr8 | 70131836 | 70141399 |
| chr8 | 70159504 | 70162854 |
| chr8 | 70170201 | 70174859 |
| chr8 | 70213902 | 70216764 |
| chr8 | 70213902 | 70296800 |
| chr8 | 70583163 | 70583793 |
| chr8 | 70583163 | 70587176 |
| chr8 | 70583163 | 70596321 |
| chr8 | 70583163 | 70598255 |
| chr8 | 70594505 | 70598255 |
| chr8 | 70657755 | 70661897 |
| chr8 | 70674817 | 70683630 |
| chr8 | 73013894 | 73027052 |
| chr8 | 73020683 | 73024971 |
| chr8 | 73291042 | 73292797 |
| chr8 | 73292238 | 73292797 |
| chr8 | 73552011 | 73673242 |
| chr8 | 73582769 | 73603863 |
| chr8 | 73582769 | 73673242 |
| chr8 | 73582769 | 73688813 |
| chr8 | 73582769 | 73709162 |
| chr8 | 73595165 | 73617451 |
| chr8 | 73595165 | 73709162 |
| chr8 | 73603725 | 73673242 |
| chr8 | 73603725 | 73688813 |
| chr8 | 73603725 | 73739868 |
| chr8 | 73613743 | 73615782 |
| chr8 | 73613743 | 73738349 |
| chr8 | 73673106 | 73688813 |
| chr8 | 73673106 | 73709162 |
| chr8 | 73673106 | 73738349 |



|      |          |          |
|------|----------|----------|
| chr8 | 73673106 | 73739868 |
| chr8 | 73688653 | 73739868 |
| chr8 | 73738283 | 73739868 |
| chr8 | 73805650 | 73830472 |
| chr8 | 73955910 | 73959818 |
| chr8 | 73955910 | 73964625 |
| chr8 | 76704042 | 76708048 |
| chr8 | 78675786 | 78689373 |
| chr8 | 78675786 | 78698513 |
| chr8 | 78689221 | 78698513 |
| chr8 | 80042619 | 80053430 |
| chr8 | 80051526 | 80053430 |
| chr8 | 80051526 | 80064593 |
| chr8 | 80499493 | 80518954 |
| chr8 | 81670938 | 81679230 |
| chr8 | 81670938 | 81680783 |
| chr8 | 81670938 | 81681584 |
| chr8 | 81673840 | 81681584 |
| chr8 | 81679125 | 81680783 |
| chr8 | 81713917 | 81718224 |
| chr8 | 81815324 | 81829516 |
| chr8 | 81829429 | 81840082 |
| chr8 | 85202146 | 85207489 |
| chr8 | 85202146 | 85209409 |
| chr8 | 86368938 | 86381629 |
| chr8 | 86374029 | 86381629 |
| chr8 | 86374029 | 86411874 |
| chr8 | 86380725 | 86398638 |
| chr8 | 86380725 | 86402203 |
| chr8 | 86398341 | 86402203 |
| chr8 | 86402018 | 86411874 |
| chr8 | 86461223 | 86461846 |
| chr8 | 86474819 | 86488639 |
| chr8 | 86478922 | 86488639 |
| chr8 | 86484871 | 86488639 |
| chr8 | 86486483 | 86488639 |
| chr8 | 86515461 | 86531229 |
| chr8 | 86515461 | 86546681 |
| chr8 | 86528535 | 86532580 |
| chr8 | 86528535 | 86537646 |
| chr8 | 86528535 | 86540334 |
| chr8 | 86554850 | 86556338 |
| chr8 | 88167668 | 88197306 |
| chr8 | 89722014 | 89725641 |
| chr8 | 89724628 | 89725641 |

|      |          |          |
|------|----------|----------|
| chr8 | 89909566 | 89921171 |
| chr8 | 89937025 | 89946295 |
| chr8 | 89937025 | 89947892 |
| chr8 | 89958724 | 89971290 |
| chr8 | 89964409 | 89971290 |
| chr8 | 89964409 | 89978323 |
| chr8 | 89970363 | 89978323 |
| chr8 | 89970363 | 89980893 |
| chr8 | 89971172 | 89978323 |
| chr8 | 90017123 | 90036940 |
| chr8 | 90017123 | 90044995 |
| chr8 | 90042727 | 90044995 |
| chr8 | 9007969  | 9020464  |
| chr8 | 91008742 | 91021404 |
| chr8 | 91018389 | 91021404 |
| chr8 | 91124492 | 91135739 |
| chr8 | 91189521 | 91200792 |
| chr8 | 91289135 | 91295703 |
| chr8 | 92916928 | 92921660 |
| chr8 | 92916928 | 92954564 |
| chr8 | 93704908 | 93709875 |
| chr8 | 93755019 | 93803684 |
| chr8 | 93786222 | 93791319 |
| chr8 | 93786222 | 93799758 |
| chr8 | 93786222 | 93803684 |
| chr8 | 93786222 | 93816515 |
| chr8 | 94378179 | 94407720 |
| chr8 | 94399413 | 94411315 |
| chr8 | 94458267 | 94467555 |
| chr8 | 94495730 | 94499506 |
| chr8 | 94499373 | 94506717 |
| chr8 | 94506499 | 94512089 |
| chr8 | 94530962 | 94538346 |
| chr8 | 94534838 | 94538346 |
| chr8 | 94534838 | 94543942 |
| chr8 | 94537102 | 94543942 |
| chr8 | 94734629 | 94739790 |
| chr8 | 94738368 | 94739790 |
| chr8 | 94756035 | 94766685 |
| chr8 | 94766611 | 94770571 |
| chr8 | 94777665 | 94783802 |
| chr8 | 94824892 | 94827403 |
| chr8 | 94824892 | 94827793 |
| chr8 | 94824892 | 94829026 |
| chr8 | 94824892 | 94836631 |

|      |          |          |
|------|----------|----------|
| chr8 | 94824892 | 94842488 |
| chr8 | 94824892 | 94849532 |
| chr8 | 94824892 | 94859632 |
| chr8 | 94827262 | 94829026 |
| chr8 | 94827262 | 94832174 |
| chr8 | 94827262 | 94842488 |
| chr8 | 94827262 | 94849532 |
| chr8 | 94827721 | 94832174 |
| chr8 | 94828974 | 94841591 |
| chr8 | 94838462 | 94859632 |
| chr8 | 94842346 | 94856978 |
| chr8 | 94851552 | 94866191 |
| chr8 | 94859510 | 94867337 |
| chr8 | 94865505 | 94866191 |
| chr8 | 94867139 | 94876489 |
| chr8 | 94867275 | 94876147 |
| chr8 | 94871883 | 94874602 |
| chr8 | 94885066 | 94885558 |
| chr8 | 94887926 | 94890550 |
| chr8 | 94939859 | 94941091 |
| chr8 | 95031994 | 95035576 |
| chr8 | 95031994 | 95048558 |
| chr8 | 95031994 | 95052230 |
| chr8 | 95035453 | 95047127 |
| chr8 | 95035453 | 95052230 |
| chr8 | 95045544 | 95047127 |
| chr8 | 95252187 | 95263774 |
| chr8 | 9580158  | 9615677  |
| chr8 | 96243918 | 96258700 |
| chr8 | 96284108 | 96299845 |
| chr8 | 96295097 | 96320345 |
| chr8 | 96304039 | 96309622 |
| chr8 | 96306443 | 96331095 |
| chr8 | 9679950  | 9706253  |
| chr8 | 96834972 | 96880005 |
| chr8 | 97029402 | 97066210 |
| chr8 | 9704662  | 9710220  |
| chr8 | 9763146  | 9766425  |
| chr8 | 97661071 | 97691188 |
| chr8 | 97686667 | 97687605 |
| chr8 | 97686667 | 97689103 |
| chr8 | 97686667 | 97691188 |
| chr8 | 97686667 | 97713769 |
| chr8 | 97687428 | 97689103 |
| chr8 | 97687428 | 97713769 |

|      |          |          |
|------|----------|----------|
| chr8 | 97690951 | 97706750 |
| chr8 | 97699753 | 97713769 |
| chr8 | 97699753 | 97723035 |
| chr8 | 97713661 | 97719189 |
| chr8 | 97713661 | 97723035 |
| chr8 | 97805352 | 97819238 |
| chr8 | 97805352 | 97825153 |
| chr8 | 97815327 | 97819238 |
| chr8 | 97815327 | 97825153 |
| chr8 | 98104488 | 98108751 |
| chr8 | 98123335 | 98128540 |
| chr8 | 98123335 | 98130226 |
| chr8 | 98123335 | 98134659 |
| chr8 | 98129977 | 98136954 |
| chr8 | 98133948 | 98134659 |
| chr8 | 98133948 | 98136738 |
| chr8 | 98136481 | 98136954 |
| chr8 | 98526741 | 98548161 |
| chr8 | 98526741 | 98596169 |
| chr8 | 98706466 | 98707311 |
| chr8 | 98706466 | 98749390 |
| chr8 | 98749275 | 98774819 |
| chr8 | 98767242 | 98774819 |
| chr8 | 99013759 | 99038566 |
| chr8 | 99013759 | 99156743 |
| chr8 | 99038422 | 99121445 |
| chr8 | 99096311 | 99103120 |
| chr8 | 99096311 | 99111279 |
| chr8 | 99096311 | 99121445 |
| chr8 | 99096311 | 99148010 |
| chr8 | 99096311 | 99193057 |
| chr8 | 99096311 | 99275254 |
| chr8 | 99102952 | 99121445 |
| chr8 | 99111097 | 99121445 |
| chr8 | 99121176 | 99136752 |
| chr8 | 99134631 | 99136752 |
| chr8 | 99134631 | 99143165 |
| chr8 | 99134631 | 99156743 |
| chr8 | 99134631 | 99193057 |
| chr8 | 99142973 | 99156743 |
| chr8 | 99156548 | 99170163 |
| chr8 | 99156548 | 99193057 |
| chr8 | 99156548 | 99275254 |
| chr8 | 99170038 | 99193057 |
| chr8 | 99170038 | 99275254 |

|      |           |           |
|------|-----------|-----------|
| chr8 | 99192875  | 99275254  |
| chr8 | 99192875  | 99391704  |
| chr8 | 99274197  | 99275254  |
| chr8 | 99274197  | 99391704  |
| chr8 | 99274197  | 99442635  |
| chr8 | 99384207  | 99442635  |
| chr8 | 99391556  | 99521010  |
| chr8 | 99431536  | 99467634  |
| chr8 | 99431536  | 99481802  |
| chr8 | 99431536  | 99521010  |
| chr8 | 99442400  | 99467634  |
| chr8 | 99442400  | 99481802  |
| chr8 | 99442400  | 99521010  |
| chr8 | 99467413  | 99481802  |
| chr8 | 99467413  | 99577633  |
| chr8 | 99481598  | 99521010  |
| chr8 | 99502835  | 99511512  |
| chr8 | 99511103  | 99521010  |
| chr8 | 99520898  | 99556653  |
| chr8 | 99520898  | 99577633  |
| chr8 | 99520898  | 99661491  |
| chr8 | 99556449  | 99577633  |
| chr8 | 99575657  | 99577633  |
| chr8 | 99641810  | 99661491  |
| chr8 | 99661353  | 99721047  |
| chr8 | 99717170  | 99721047  |
| chr8 | 99809374  | 99823978  |
| chr8 | 99809374  | 99835738  |
| chr9 | 100006505 | 100022226 |
| chr9 | 100052416 | 100060172 |
| chr9 | 100104497 | 100126549 |
| chr9 | 100226061 | 100229827 |
| chr9 | 100229659 | 100253136 |
| chr9 | 100240059 | 100253136 |
| chr9 | 100246615 | 100253136 |
| chr9 | 100252282 | 100273076 |
| chr9 | 100303631 | 100310379 |
| chr9 | 100308499 | 100310379 |
| chr9 | 100308499 | 100321771 |
| chr9 | 100308499 | 100349372 |
| chr9 | 100310298 | 100321771 |
| chr9 | 100310298 | 100349372 |
| chr9 | 100320264 | 100321771 |
| chr9 | 100320264 | 100330169 |
| chr9 | 100320264 | 100349369 |

|      |           |           |
|------|-----------|-----------|
| chr9 | 100320264 | 100349372 |
| chr9 | 100340256 | 100349372 |
| chr9 | 100498764 | 100509134 |
| chr9 | 100498764 | 100516771 |
| chr9 | 100498764 | 100550160 |
| chr9 | 100509004 | 100516771 |
| chr9 | 100513306 | 100561520 |
| chr9 | 101540489 | 101544885 |
| chr9 | 104129644 | 104132125 |
| chr9 | 104750955 | 104759171 |
| chr9 | 105299219 | 105335699 |
| chr9 | 105348357 | 105358433 |
| chr9 | 105348357 | 105361330 |
| chr9 | 105362820 | 105374735 |
| chr9 | 105464235 | 105472005 |
| chr9 | 105464235 | 105484502 |
| chr9 | 105471903 | 105484502 |
| chr9 | 105534492 | 105539351 |
| chr9 | 105601144 | 105618092 |
| chr9 | 105615277 | 105620061 |
| chr9 | 105705596 | 105722621 |
| chr9 | 105705596 | 105748190 |
| chr9 | 105721536 | 105722621 |
| chr9 | 106923353 | 106935621 |
| chr9 | 106923353 | 106939107 |
| chr9 | 106972004 | 106974273 |
| chr9 | 106972004 | 106984409 |
| chr9 | 106972004 | 107003426 |
| chr9 | 107300140 | 107306647 |
| chr9 | 107300140 | 107311737 |
| chr9 | 107300140 | 107318879 |
| chr9 | 107300140 | 107325004 |
| chr9 | 107302034 | 107306647 |
| chr9 | 107302034 | 107311737 |
| chr9 | 107302034 | 107325004 |
| chr9 | 107321982 | 107325004 |
| chr9 | 108874894 | 108882187 |
| chr9 | 108899821 | 108919349 |
| chr9 | 108922841 | 108929921 |
| chr9 | 108952208 | 108952494 |
| chr9 | 108965377 | 108999256 |
| chr9 | 108990725 | 108999256 |
| chr9 | 109033306 | 109038117 |
| chr9 | 109033306 | 109050692 |
| chr9 | 109033306 | 109057322 |

|      |           |           |
|------|-----------|-----------|
| chr9 | 109033306 | 109060452 |
| chr9 | 109033306 | 109108570 |
| chr9 | 109036205 | 109060452 |
| chr9 | 109050282 | 109050692 |
| chr9 | 109050282 | 109057322 |
| chr9 | 109050282 | 109060452 |
| chr9 | 109050282 | 109064567 |
| chr9 | 109050282 | 109073438 |
| chr9 | 109057190 | 109060452 |
| chr9 | 109057190 | 109064567 |
| chr9 | 109057190 | 109073438 |
| chr9 | 109057190 | 109093591 |
| chr9 | 109057190 | 109108570 |
| chr9 | 109073355 | 109087342 |
| chr9 | 109073355 | 109108570 |
| chr9 | 109080838 | 109087342 |
| chr9 | 109080838 | 109108570 |
| chr9 | 109087172 | 109091155 |
| chr9 | 109087172 | 109108570 |
| chr9 | 109090921 | 109108570 |
| chr9 | 109093474 | 109108570 |
| chr9 | 109106507 | 109108570 |
| chr9 | 109404447 | 109408377 |
| chr9 | 109420423 | 109438234 |
| chr9 | 109780487 | 109925082 |
| chr9 | 109867490 | 109880681 |
| chr9 | 110941420 | 110973558 |
| chr9 | 110972072 | 110973558 |
| chr9 | 111373169 | 111385442 |
| chr9 | 111378579 | 111385442 |
| chr9 | 111383210 | 111391824 |
| chr9 | 111386376 | 111391824 |
| chr9 | 111391755 | 111394305 |
| chr9 | 111392767 | 111394305 |
| chr9 | 111392767 | 111410213 |
| chr9 | 111408570 | 111410213 |
| chr9 | 111408570 | 111451555 |
| chr9 | 111410979 | 111416352 |
| chr9 | 111425417 | 111444494 |
| chr9 | 111428041 | 111442424 |
| chr9 | 111433232 | 111442424 |
| chr9 | 111433232 | 111444494 |
| chr9 | 111436939 | 111451555 |
| chr9 | 111440371 | 111444494 |
| chr9 | 111440371 | 111451555 |

|      |           |           |
|------|-----------|-----------|
| chr9 | 111527267 | 111530963 |
| chr9 | 111527267 | 111534353 |
| chr9 | 111530874 | 111534353 |
| chr9 | 111533738 | 111534353 |
| chr9 | 111570090 | 111586165 |
| chr9 | 111570090 | 111597432 |
| chr9 | 111574733 | 111586165 |
| chr9 | 111574733 | 111597432 |
| chr9 | 111578795 | 111586165 |
| chr9 | 111578795 | 111592982 |
| chr9 | 111578795 | 111597432 |
| chr9 | 111583471 | 111586165 |
| chr9 | 111775790 | 111786035 |
| chr9 | 111914604 | 111922951 |
| chr9 | 111914604 | 111926496 |
| chr9 | 111914604 | 111929678 |
| chr9 | 111914604 | 111931357 |
| chr9 | 111922848 | 111926496 |
| chr9 | 111922848 | 111929678 |
| chr9 | 111922848 | 111931357 |
| chr9 | 111924776 | 111931357 |
| chr9 | 111929499 | 111931357 |
| chr9 | 112052398 | 112063033 |
| chr9 | 112062936 | 112078724 |
| chr9 | 112078537 | 112080165 |
| chr9 | 112078537 | 112098662 |
| chr9 | 112078537 | 112102285 |
| chr9 | 112098469 | 112112868 |
| chr9 | 112098469 | 112124436 |
| chr9 | 112111653 | 112112868 |
| chr9 | 112124256 | 112143623 |
| chr9 | 112142319 | 112157613 |
| chr9 | 112149243 | 112157613 |
| chr9 | 112232098 | 112252788 |
| chr9 | 112250928 | 112252788 |
| chr9 | 112250928 | 112262599 |
| chr9 | 112250928 | 112268195 |
| chr9 | 112250928 | 112276013 |
| chr9 | 112250928 | 112297916 |
| chr9 | 112250928 | 112330474 |
| chr9 | 112252677 | 112262599 |
| chr9 | 112252677 | 112297916 |
| chr9 | 112262434 | 112276013 |
| chr9 | 112262434 | 112297916 |
| chr9 | 112262434 | 112330474 |



|      |           |           |
|------|-----------|-----------|
| chr9 | 112268048 | 112276013 |
| chr9 | 112268048 | 112297916 |
| chr9 | 112275843 | 112297916 |
| chr9 | 112275843 | 112330474 |
| chr9 | 112403994 | 112405722 |
| chr9 | 112403994 | 112409021 |
| chr9 | 112403994 | 112459577 |
| chr9 | 112405623 | 112409021 |
| chr9 | 112405623 | 112418958 |
| chr9 | 112438430 | 112441770 |
| chr9 | 113171580 | 113176673 |
| chr9 | 113198854 | 113203035 |
| chr9 | 113256113 | 113257185 |
| chr9 | 113256113 | 113258862 |
| chr9 | 113276547 | 113291016 |
| chr9 | 113278944 | 113283482 |
| chr9 | 113282645 | 113283482 |
| chr9 | 113286231 | 113288264 |
| chr9 | 113328880 | 113332050 |
| chr9 | 113328880 | 113336440 |
| chr9 | 113969116 | 113988580 |
| chr9 | 113969116 | 114016784 |
| chr9 | 114162714 | 114169463 |
| chr9 | 114162714 | 114183075 |
| chr9 | 114209674 | 114243560 |
| chr9 | 114341532 | 114343803 |
| chr9 | 114466266 | 114478771 |
| chr9 | 114624349 | 114628250 |
| chr9 | 114633767 | 114637070 |
| chr9 | 114636989 | 114638726 |
| chr9 | 116618323 | 116620443 |
| chr9 | 120415039 | 120439972 |
| chr9 | 120419787 | 120422741 |
| chr9 | 120422692 | 120471878 |
| chr9 | 120437294 | 120439972 |
| chr9 | 120437294 | 120448126 |
| chr9 | 120437294 | 120460667 |
| chr9 | 120467859 | 120491477 |
| chr9 | 120477349 | 120487437 |
| chr9 | 120477349 | 120491477 |
| chr9 | 120477349 | 120518645 |
| chr9 | 120487293 | 120491477 |
| chr9 | 120487293 | 120518645 |
| chr9 | 120487293 | 120545790 |
| chr9 | 120518426 | 120539164 |

|      |           |           |
|------|-----------|-----------|
| chr9 | 120529977 | 120568388 |
| chr9 | 120536371 | 120539164 |
| chr9 | 120536371 | 120568388 |
| chr9 | 120539040 | 120568388 |
| chr9 | 120545713 | 120568388 |
| chr9 | 120771347 | 120772840 |
| chr9 | 120820838 | 120826907 |
| chr9 | 120831330 | 120833456 |
| chr9 | 120923704 | 120926688 |
| chr9 | 120980082 | 120981939 |
| chr9 | 121161855 | 121162271 |
| chr9 | 121161855 | 121166180 |
| chr9 | 121182929 | 121193419 |
| chr9 | 121190553 | 121193419 |
| chr9 | 121699324 | 121760439 |
| chr9 | 121699324 | 121782401 |
| chr9 | 121960    | 172172    |
| chr9 | 121974008 | 121974979 |
| chr9 | 121974008 | 121989770 |
| chr9 | 122148111 | 122152408 |
| chr9 | 122251846 | 122261508 |
| chr9 | 122270863 | 122280598 |
| chr9 | 122270863 | 122291840 |
| chr9 | 122280442 | 122291840 |
| chr9 | 122280442 | 122313386 |
| chr9 | 122853951 | 122859102 |
| chr9 | 122853951 | 122865657 |
| chr9 | 122865348 | 122877583 |
| chr9 | 122865348 | 122883379 |
| chr9 | 122877470 | 122880794 |
| chr9 | 122877470 | 122883379 |
| chr9 | 122877470 | 122897576 |
| chr9 | 122892908 | 122897576 |
| chr9 | 122957010 | 122986419 |
| chr9 | 122984484 | 122986419 |
| chr9 | 122989296 | 122990213 |
| chr9 | 122996538 | 123010528 |
| chr9 | 122998596 | 123020459 |
| chr9 | 123070349 | 123076762 |
| chr9 | 123097740 | 123099549 |
| chr9 | 123128213 | 123147870 |
| chr9 | 123128213 | 123170046 |
| chr9 | 123128213 | 123184298 |
| chr9 | 123132844 | 123139687 |
| chr9 | 123136040 | 123184298 |

|      |           |           |
|------|-----------|-----------|
| chr9 | 123139528 | 123147870 |
| chr9 | 123146854 | 123147870 |
| chr9 | 123146854 | 123160462 |
| chr9 | 123158331 | 123184298 |
| chr9 | 123160976 | 123184298 |
| chr9 | 123168188 | 123184298 |
| chr9 | 123169901 | 123173842 |
| chr9 | 123169901 | 123179227 |
| chr9 | 123169901 | 123184298 |
| chr9 | 123173676 | 123184298 |
| chr9 | 123179006 | 123184298 |
| chr9 | 123440359 | 123452347 |
| chr9 | 123440359 | 123457897 |
| chr9 | 123452275 | 123457897 |
| chr9 | 123557569 | 123583270 |
| chr9 | 123557569 | 123652123 |
| chr9 | 123557569 | 123879021 |
| chr9 | 123583168 | 123652123 |
| chr9 | 123583168 | 123757822 |
| chr9 | 123583168 | 123879021 |
| chr9 | 123609435 | 123652123 |
| chr9 | 123609435 | 123879021 |
| chr9 | 123630375 | 123676789 |
| chr9 | 123630375 | 123879021 |
| chr9 | 123652012 | 123671371 |
| chr9 | 123652012 | 123879021 |
| chr9 | 123667025 | 123757822 |
| chr9 | 123676719 | 123879021 |
| chr9 | 123757702 | 123792630 |
| chr9 | 123757702 | 123879021 |
| chr9 | 124301935 | 124313985 |
| chr9 | 124301935 | 124327445 |
| chr9 | 124301935 | 124339665 |
| chr9 | 124312508 | 124327445 |
| chr9 | 124321458 | 124327445 |
| chr9 | 124384597 | 124414935 |
| chr9 | 124412351 | 124414935 |
| chr9 | 124538091 | 124540187 |
| chr9 | 124898548 | 124912026 |
| chr9 | 124899328 | 124900547 |
| chr9 | 124908376 | 124912026 |
| chr9 | 124921128 | 124923223 |
| chr9 | 124923094 | 124938866 |
| chr9 | 124938576 | 124940155 |
| chr9 | 124971369 | 124976186 |

|      |           |           |
|------|-----------|-----------|
| chr9 | 124971369 | 124999990 |
| chr9 | 124971369 | 125003570 |
| chr9 | 124971369 | 125056007 |
| chr9 | 124994933 | 125003570 |
| chr9 | 124999890 | 125003570 |
| chr9 | 124999890 | 125026910 |
| chr9 | 125018798 | 125056007 |
| chr9 | 125055875 | 125066058 |
| chr9 | 125153532 | 125153985 |
| chr9 | 125153532 | 125158382 |
| chr9 | 125158240 | 125160906 |
| chr9 | 125207563 | 125220700 |
| chr9 | 125213369 | 125220700 |
| chr9 | 125227909 | 125232745 |
| chr9 | 125295457 | 125299106 |
| chr9 | 125301982 | 125323923 |
| chr9 | 125307412 | 125307880 |
| chr9 | 125326415 | 125330218 |
| chr9 | 125337017 | 125337591 |
| chr9 | 125341176 | 125346941 |
| chr9 | 125341176 | 125350872 |
| chr9 | 125467971 | 125559809 |
| chr9 | 125484442 | 125506417 |
| chr9 | 125484442 | 125672643 |
| chr9 | 125506309 | 125559809 |
| chr9 | 125543058 | 125559809 |
| chr9 | 125559632 | 125585727 |
| chr9 | 125657650 | 125672643 |
| chr9 | 125669817 | 125672643 |
| chr9 | 125915685 | 125935607 |
| chr9 | 125929654 | 125935607 |
| chr9 | 126340507 | 126386658 |
| chr9 | 126340507 | 126392195 |
| chr9 | 126340507 | 126395697 |
| chr9 | 126340507 | 126421948 |
| chr9 | 126381063 | 126392195 |
| chr9 | 126381063 | 126395697 |
| chr9 | 126386561 | 126395697 |
| chr9 | 126392065 | 126395697 |
| chr9 | 126392065 | 126421948 |
| chr9 | 126962224 | 126977745 |
| chr9 | 127034430 | 127052939 |
| chr9 | 127034430 | 127069356 |
| chr9 | 127050042 | 127069356 |
| chr9 | 127195090 | 127199066 |

|      |           |           |
|------|-----------|-----------|
| chr9 | 127264951 | 127325095 |
| chr9 | 127291167 | 127325095 |
| chr9 | 127311635 | 127320778 |
| chr9 | 127311635 | 127325095 |
| chr9 | 127332273 | 127339751 |
| chr9 | 127339644 | 127342334 |
| chr9 | 127344234 | 127345477 |
| chr9 | 127353845 | 127354410 |
| chr9 | 127353845 | 127365366 |
| chr9 | 127435089 | 127436003 |
| chr9 | 127447876 | 127449708 |
| chr9 | 127461172 | 127462373 |
| chr9 | 127461172 | 127473931 |
| chr9 | 127467739 | 127473931 |
| chr9 | 127487675 | 127492897 |
| chr9 | 127507866 | 127508538 |
| chr9 | 127517825 | 127531778 |
| chr9 | 127525057 | 127531778 |
| chr9 | 127658374 | 127661205 |
| chr9 | 127658374 | 127668187 |
| chr9 | 127675803 | 127676753 |
| chr9 | 127804284 | 127804700 |
| chr9 | 128101095 | 128107179 |
| chr9 | 128122361 | 128123134 |
| chr9 | 128169051 | 128180799 |
| chr9 | 128179072 | 128180799 |
| chr9 | 128180414 | 128190862 |
| chr9 | 128185546 | 128187934 |
| chr9 | 128262562 | 128263092 |
| chr9 | 128325142 | 128325881 |
| chr9 | 128352637 | 128353541 |
| chr9 | 128422867 | 128424614 |
| chr9 | 128459566 | 128461010 |
| chr9 | 128459566 | 128461067 |
| chr9 | 128472912 | 128473741 |
| chr9 | 128487889 | 128492805 |
| chr9 | 128492425 | 128492805 |
| chr9 | 128508875 | 128515639 |
| chr9 | 128508875 | 128523846 |
| chr9 | 128508875 | 128533951 |
| chr9 | 128522667 | 128523846 |
| chr9 | 128523279 | 128523846 |
| chr9 | 128525191 | 128533951 |
| chr9 | 128533512 | 128533951 |
| chr9 | 128566737 | 128568897 |

|      |           |           |
|------|-----------|-----------|
| chr9 | 128579636 | 128588943 |
| chr9 | 128598399 | 128604417 |
| chr9 | 128600079 | 128604417 |
| chr9 | 128600079 | 128605477 |
| chr9 | 128607603 | 128613485 |
| chr9 | 128607603 | 128619003 |
| chr9 | 128608129 | 128617760 |
| chr9 | 128608129 | 128626687 |
| chr9 | 128630320 | 128632955 |
| chr9 | 128740771 | 128742745 |
| chr9 | 128790734 | 128804119 |
| chr9 | 128803249 | 128804119 |
| chr9 | 128842653 | 128847643 |
| chr9 | 128952772 | 128957032 |
| chr9 | 128968505 | 128985014 |
| chr9 | 128970757 | 128981390 |
| chr9 | 128982548 | 128983550 |
| chr9 | 128998150 | 128999805 |
| chr9 | 129097249 | 129098650 |
| chr9 | 129120512 | 129123138 |
| chr9 | 129120512 | 129137692 |
| chr9 | 129128984 | 129131639 |
| chr9 | 129128984 | 129134894 |
| chr9 | 129807187 | 129809032 |
| chr9 | 129849812 | 129861612 |
| chr9 | 129895837 | 129903001 |
| chr9 | 129899964 | 129900547 |
| chr9 | 129957359 | 129958553 |
| chr9 | 129978464 | 129979374 |
| chr9 | 130075635 | 130083602 |
| chr9 | 130076411 | 130083602 |
| chr9 | 130079629 | 130083602 |
| chr9 | 130079629 | 130107539 |
| chr9 | 130099456 | 130101223 |
| chr9 | 130099456 | 130107539 |
| chr9 | 130124914 | 130128761 |
| chr9 | 130217831 | 130226504 |
| chr9 | 130219724 | 130223159 |
| chr9 | 130222649 | 130223159 |
| chr9 | 130222649 | 130226504 |
| chr9 | 130595482 | 130620458 |
| chr9 | 130698161 | 130700935 |
| chr9 | 130854063 | 130863035 |
| chr9 | 130854063 | 130875052 |
| chr9 | 130854063 | 130880664 |

|      |           |           |
|------|-----------|-----------|
| chr9 | 131079148 | 131085723 |
| chr9 | 131130765 | 131147584 |
| chr9 | 131135939 | 131147584 |
| chr9 | 131139280 | 131147584 |
| chr9 | 131139280 | 131151894 |
| chr9 | 131150323 | 131151894 |
| chr9 | 131159382 | 131164144 |
| chr9 | 131159382 | 131195294 |
| chr9 | 131174054 | 131178410 |
| chr9 | 131192207 | 131201717 |
| chr9 | 131195232 | 131201717 |
| chr9 | 131197215 | 131201717 |
| chr9 | 13136091  | 13138153  |
| chr9 | 131430089 | 131432794 |
| chr9 | 131430089 | 131439061 |
| chr9 | 131430089 | 131444328 |
| chr9 | 131430089 | 131447206 |
| chr9 | 131430089 | 131447804 |
| chr9 | 131430089 | 131455166 |
| chr9 | 131430089 | 131459356 |
| chr9 | 131430089 | 131467753 |
| chr9 | 131432616 | 131436722 |
| chr9 | 131432616 | 131439061 |
| chr9 | 131436619 | 131439061 |
| chr9 | 131436619 | 131447804 |
| chr9 | 131436619 | 131455166 |
| chr9 | 131444184 | 131455166 |
| chr9 | 131447084 | 131459356 |
| chr9 | 131455075 | 131459356 |
| chr9 | 131455075 | 131470983 |
| chr9 | 131467562 | 131470983 |
| chr9 | 131506113 | 131506453 |
| chr9 | 131506113 | 131507514 |
| chr9 | 131621795 | 131650949 |
| chr9 | 131638634 | 131650949 |
| chr9 | 131643238 | 131650949 |
| chr9 | 131884057 | 132014467 |
| chr9 | 131893884 | 131939474 |
| chr9 | 131893884 | 132014467 |
| chr9 | 13205035  | 13206099  |
| chr9 | 13205035  | 13247801  |
| chr9 | 13205035  | 13250372  |
| chr9 | 13216773  | 13223710  |
| chr9 | 13216773  | 13224583  |
| chr9 | 132271709 | 132278257 |

|      |           |           |
|------|-----------|-----------|
| chr9 | 132275255 | 132311856 |
| chr9 | 132277059 | 132311856 |
| chr9 | 132278069 | 132281574 |
| chr9 | 132278069 | 132286494 |
| chr9 | 132296886 | 132300803 |
| chr9 | 132296886 | 132311856 |
| chr9 | 132300629 | 132311856 |
| chr9 | 132311756 | 132349435 |
| chr9 | 132334607 | 132349435 |
| chr9 | 132342689 | 132349435 |
| chr9 | 132342689 | 132353755 |
| chr9 | 132346260 | 132349435 |
| chr9 | 132346260 | 132353755 |
| chr9 | 132386555 | 132396511 |
| chr9 | 132386555 | 132402828 |
| chr9 | 13247634  | 13250372  |
| chr9 | 132612086 | 132625745 |
| chr9 | 132612086 | 132632091 |
| chr9 | 132612086 | 132642063 |
| chr9 | 132612086 | 132652492 |
| chr9 | 132618329 | 132625745 |
| chr9 | 132625663 | 132632091 |
| chr9 | 132645894 | 132648295 |
| chr9 | 132658670 | 132662695 |
| chr9 | 132927200 | 132928952 |
| chr9 | 133042086 | 133043926 |
| chr9 | 133105931 | 133112152 |
| chr9 | 133408767 | 133412921 |
| chr9 | 133412298 | 133412921 |
| chr9 | 133437748 | 133438366 |
| chr9 | 133806080 | 133812216 |
| chr9 | 133806080 | 133834340 |
| chr9 | 133834271 | 133939219 |
| chr9 | 134139819 | 134140811 |
| chr9 | 134139819 | 134148343 |
| chr9 | 134141509 | 134142719 |
| chr9 | 134401631 | 134409119 |
| chr9 | 134690911 | 134701333 |
| chr9 | 134699908 | 134701333 |
| chr9 | 134727265 | 134732127 |
| chr9 | 134727265 | 134738808 |
| chr9 | 134795081 | 134802995 |
| chr9 | 135482682 | 135484082 |
| chr9 | 135850136 | 135850461 |
| chr9 | 135850136 | 135862608 |



|      |           |           |
|------|-----------|-----------|
| chr9 | 135850136 | 135866536 |
| chr9 | 135850136 | 135881794 |
| chr9 | 135850136 | 135883078 |
| chr9 | 135862466 | 135883078 |
| chr9 | 135866455 | 135883078 |
| chr9 | 135881632 | 135883078 |
| chr9 | 135945027 | 135947905 |
| chr9 | 136013198 | 136016429 |
| chr9 | 136223762 | 136226874 |
| chr9 | 136224006 | 136226874 |
| chr9 | 136334446 | 136340993 |
| chr9 | 136348696 | 136349763 |
| chr9 | 136380739 | 136382073 |
| chr9 | 136387484 | 136387848 |
| chr9 | 136394248 | 136395770 |
| chr9 | 136404630 | 136407938 |
| chr9 | 136405904 | 136409067 |
| chr9 | 136407144 | 136407938 |
| chr9 | 136446854 | 136448161 |
| chr9 | 136451255 | 136455793 |
| chr9 | 136459133 | 136460123 |
| chr9 | 136466956 | 136468512 |
| chr9 | 136515980 | 136517385 |
| chr9 | 136517751 | 136519565 |
| chr9 | 136522849 | 136523979 |
| chr9 | 136823524 | 136832370 |
| chr9 | 136862905 | 136863871 |
| chr9 | 136898712 | 136900520 |
| chr9 | 136898712 | 136909994 |
| chr9 | 136898712 | 136916615 |
| chr9 | 136899593 | 136909994 |
| chr9 | 136908069 | 136916615 |
| chr9 | 136920233 | 136921215 |
| chr9 | 136920233 | 136924000 |
| chr9 | 137080001 | 137082064 |
| chr9 | 137088074 | 137089005 |
| chr9 | 137265876 | 137267346 |
| chr9 | 137564433 | 137565154 |
| chr9 | 137574207 | 137577603 |
| chr9 | 137586966 | 137588718 |
| chr9 | 137710966 | 137744090 |
| chr9 | 137716625 | 137744090 |
| chr9 | 137716625 | 137752408 |
| chr9 | 137716625 | 137758011 |
| chr9 | 137728348 | 137744090 |

|      |           |           |
|------|-----------|-----------|
| chr9 | 137728348 | 137754291 |
| chr9 | 137728348 | 137758011 |
| chr9 | 137728348 | 137762820 |
| chr9 | 137743370 | 137754291 |
| chr9 | 137743370 | 137758011 |
| chr9 | 137743370 | 137762820 |
| chr9 | 137743370 | 137818138 |
| chr9 | 137752330 | 137754291 |
| chr9 | 137752330 | 137758011 |
| chr9 | 137754170 | 137758011 |
| chr9 | 137754170 | 137762820 |
| chr9 | 137754170 | 137782397 |
| chr9 | 137754170 | 137818138 |
| chr9 | 137757879 | 137762820 |
| chr9 | 137775108 | 137782397 |
| chr9 | 137776617 | 137782397 |
| chr9 | 137790847 | 137800984 |
| chr9 | 137790847 | 137818138 |
| chr9 | 137811460 | 137818138 |
| chr9 | 137813385 | 137817525 |
| chr9 | 137815946 | 137818138 |
| chr9 | 14102421  | 14125766  |
| chr9 | 14120439  | 14179780  |
| chr9 | 14125631  | 14146807  |
| chr9 | 14146688  | 14155893  |
| chr9 | 14146688  | 14179780  |
| chr9 | 146101    | 164037    |
| chr9 | 146101    | 172172    |
| chr9 | 14639895  | 14662326  |
| chr9 | 14639895  | 14674385  |
| chr9 | 14639895  | 14680162  |
| chr9 | 14672829  | 14680162  |
| chr9 | 15177696  | 15187035  |
| chr9 | 15199860  | 15211397  |
| chr9 | 152033    | 172172    |
| chr9 | 15210087  | 15214249  |
| chr9 | 15210087  | 15226012  |
| chr9 | 15433551  | 15447244  |
| chr9 | 15474008  | 15490124  |
| chr9 | 15478476  | 15490124  |
| chr9 | 15486005  | 15490124  |
| chr9 | 15846701  | 15874663  |
| chr9 | 162431    | 172172    |
| chr9 | 17298189  | 17309252  |
| chr9 | 17298189  | 17342444  |

|      |          |          |
|------|----------|----------|
| chr9 | 17309057 | 17342444 |
| chr9 | 19057960 | 19080672 |
| chr9 | 19060087 | 19096769 |
| chr9 | 19063007 | 19063580 |
| chr9 | 19063007 | 19076704 |
| chr9 | 19063007 | 19096769 |
| chr9 | 19070218 | 19080672 |
| chr9 | 19070218 | 19096769 |
| chr9 | 19076601 | 19096769 |
| chr9 | 19082872 | 19096769 |
| chr9 | 19086733 | 19096769 |
| chr9 | 19093170 | 19096769 |
| chr9 | 19276157 | 19288665 |
| chr9 | 19276157 | 19290876 |
| chr9 | 19276157 | 19332184 |
| chr9 | 19286768 | 19288665 |
| chr9 | 19286768 | 19300331 |
| chr9 | 19286768 | 19305527 |
| chr9 | 19288595 | 19290876 |
| chr9 | 19288595 | 19300331 |
| chr9 | 19288595 | 19305527 |
| chr9 | 19290703 | 19300331 |
| chr9 | 19316416 | 19316839 |
| chr9 | 19316416 | 19328162 |
| chr9 | 19352072 | 19360489 |
| chr9 | 19356971 | 19358160 |
| chr9 | 19356971 | 19360489 |
| chr9 | 19360243 | 19361963 |
| chr9 | 19361845 | 19371820 |
| chr9 | 19423861 | 19435084 |
| chr9 | 2028986  | 2039900  |
| chr9 | 20353524 | 20365744 |
| chr9 | 20360741 | 20365744 |
| chr9 | 20363475 | 20365744 |
| chr9 | 20413720 | 20456786 |
| chr9 | 20448122 | 20456786 |
| chr9 | 20694519 | 20720534 |
| chr9 | 20694519 | 20740340 |
| chr9 | 20715321 | 20720534 |
| chr9 | 20715321 | 20740340 |
| chr9 | 20715321 | 20758191 |
| chr9 | 20715321 | 20765073 |
| chr9 | 20715321 | 20770238 |
| chr9 | 20715321 | 20781929 |
| chr9 | 20715321 | 20789608 |

|      |          |          |
|------|----------|----------|
| chr9 | 20715321 | 20823115 |
| chr9 | 20715321 | 20867012 |
| chr9 | 20758089 | 20770238 |
| chr9 | 20758089 | 20778768 |
| chr9 | 20778680 | 20789608 |
| chr9 | 20819795 | 20823115 |
| chr9 | 20819795 | 20874807 |
| chr9 | 20819795 | 20885230 |
| chr9 | 20819795 | 20926417 |
| chr9 | 20874680 | 20885230 |
| chr9 | 20874680 | 20907242 |
| chr9 | 20881870 | 20916937 |
| chr9 | 20881870 | 20923768 |
| chr9 | 20881870 | 20929596 |
| chr9 | 20881870 | 20933103 |
| chr9 | 20885108 | 20916937 |
| chr9 | 20907149 | 20916937 |
| chr9 | 20907149 | 20926417 |
| chr9 | 20907149 | 20929596 |
| chr9 | 20907149 | 20933103 |
| chr9 | 20923659 | 20933103 |
| chr9 | 20944626 | 20953065 |
| chr9 | 20948270 | 20953065 |
| chr9 | 21476898 | 21477292 |
| chr9 | 21815432 | 21818202 |
| chr9 | 2181570  | 2186228  |
| chr9 | 21837907 | 21859425 |
| chr9 | 21854630 | 21859425 |
| chr9 | 22723308 | 22821598 |
| chr9 | 23602684 | 23605101 |
| chr9 | 2536358  | 2539552  |
| chr9 | 26861065 | 26887513 |
| chr9 | 26884809 | 26887513 |
| chr9 | 26886103 | 26887513 |
| chr9 | 26907833 | 26913947 |
| chr9 | 26910337 | 26913947 |
| chr9 | 26910337 | 26928408 |
| chr9 | 26919309 | 26928408 |
| chr9 | 26923177 | 26928220 |
| chr9 | 26923177 | 26928408 |
| chr9 | 26923177 | 26935206 |
| chr9 | 26926392 | 26935206 |
| chr9 | 26928099 | 26935206 |
| chr9 | 26984256 | 26990195 |
| chr9 | 27044741 | 27048274 |

|      |          |          |
|------|----------|----------|
| chr9 | 2811360  | 2820098  |
| chr9 | 32418127 | 32436397 |
| chr9 | 32429418 | 32431843 |
| chr9 | 32433727 | 32436397 |
| chr9 | 32440464 | 32449081 |
| chr9 | 32480218 | 32481497 |
| chr9 | 3275499  | 3293258  |
| chr9 | 3288130  | 3293258  |
| chr9 | 3301545  | 3395596  |
| chr9 | 33026474 | 33026990 |
| chr9 | 33029884 | 33034330 |
| chr9 | 33036573 | 33037115 |
| chr9 | 33048105 | 33060584 |
| chr9 | 33060464 | 33071892 |
| chr9 | 33068823 | 33071892 |
| chr9 | 33068823 | 33073806 |
| chr9 | 33270622 | 33278225 |
| chr9 | 33271151 | 33278225 |
| chr9 | 33276455 | 33278225 |
| chr9 | 3330258  | 3346764  |
| chr9 | 3330258  | 3395596  |
| chr9 | 33303190 | 33319127 |
| chr9 | 33311105 | 33319127 |
| chr9 | 33313653 | 33328678 |
| chr9 | 33318730 | 33328678 |
| chr9 | 33318730 | 33332502 |
| chr9 | 33318730 | 33352719 |
| chr9 | 33328580 | 33338589 |
| chr9 | 33328580 | 33347117 |
| chr9 | 33338509 | 33344188 |
| chr9 | 33347037 | 33352719 |
| chr9 | 33347037 | 33354892 |
| chr9 | 33351559 | 33352719 |
| chr9 | 33351559 | 33354892 |
| chr9 | 33504537 | 33509336 |
| chr9 | 33508362 | 33510711 |
| chr9 | 33528726 | 33529173 |
| chr9 | 33528726 | 33536945 |
| chr9 | 33886880 | 33900271 |
| chr9 | 33886880 | 33912098 |
| chr9 | 33900173 | 33912098 |
| chr9 | 33932561 | 33933628 |
| chr9 | 33941648 | 33953474 |
| chr9 | 33941648 | 33963791 |
| chr9 | 33941648 | 33989126 |

|      |          |          |
|------|----------|----------|
| chr9 | 33943419 | 33948587 |
| chr9 | 33943419 | 33956146 |
| chr9 | 33944364 | 33948587 |
| chr9 | 33944364 | 33953474 |
| chr9 | 33944364 | 33956146 |
| chr9 | 33948373 | 33953474 |
| chr9 | 33948373 | 33956146 |
| chr9 | 33948373 | 33963791 |
| chr9 | 33948373 | 33973237 |
| chr9 | 33948373 | 33996333 |
| chr9 | 33953284 | 33956146 |
| chr9 | 33953284 | 33960878 |
| chr9 | 33953284 | 33963791 |
| chr9 | 33953284 | 33973237 |
| chr9 | 33953284 | 34017189 |
| chr9 | 33956078 | 34017189 |
| chr9 | 33960825 | 33973237 |
| chr9 | 33971650 | 33973237 |
| chr9 | 33971650 | 34017189 |
| chr9 | 33986759 | 34017189 |
| chr9 | 33996222 | 34017189 |
| chr9 | 34096715 | 34098517 |
| chr9 | 34096715 | 34125277 |
| chr9 | 34106433 | 34107565 |
| chr9 | 34220907 | 34242108 |
| chr9 | 34234215 | 34242108 |
| chr9 | 34263100 | 34271930 |
| chr9 | 34269256 | 34271930 |
| chr9 | 34269256 | 34286704 |
| chr9 | 34269256 | 34306441 |
| chr9 | 34271808 | 34290389 |
| chr9 | 34286616 | 34290389 |
| chr9 | 34286616 | 34297114 |
| chr9 | 35067890 | 35068362 |
| chr9 | 35100597 | 35101962 |
| chr9 | 35228014 | 35237826 |
| chr9 | 35228014 | 35243364 |
| chr9 | 35228014 | 35259050 |
| chr9 | 35231119 | 35243364 |
| chr9 | 35231119 | 35259050 |
| chr9 | 35236468 | 35243364 |
| chr9 | 35236468 | 35259050 |
| chr9 | 35295695 | 35313989 |
| chr9 | 35295695 | 35366993 |
| chr9 | 35376027 | 35382507 |

|      |          |          |
|------|----------|----------|
| chr9 | 35555059 | 35556448 |
| chr9 | 35558196 | 35559272 |
| chr9 | 35703774 | 35705670 |
| chr9 | 36052264 | 36065624 |
| chr9 | 36198978 | 36204179 |
| chr9 | 36222776 | 36249397 |
| chr9 | 36227247 | 36246482 |
| chr9 | 36233919 | 36246482 |
| chr9 | 36246030 | 36249397 |
| chr9 | 36344831 | 36353331 |
| chr9 | 36351114 | 36353331 |
| chr9 | 36351114 | 36357942 |
| chr9 | 36351114 | 36376127 |
| chr9 | 36352741 | 36390616 |
| chr9 | 36369718 | 36390616 |
| chr9 | 36581643 | 36589652 |
| chr9 | 36581643 | 36607673 |
| chr9 | 36583626 | 36589652 |
| chr9 | 36594627 | 36607673 |
| chr9 | 36594627 | 36633200 |
| chr9 | 36594627 | 36643083 |
| chr9 | 36594627 | 36651877 |
| chr9 | 36597221 | 36607673 |
| chr9 | 36597221 | 36643083 |
| chr9 | 36607574 | 36643083 |
| chr9 | 36607578 | 36643083 |
| chr9 | 36630298 | 36651877 |
| chr9 | 36642996 | 36665581 |
| chr9 | 36651745 | 36665581 |
| chr9 | 36657240 | 36674937 |
| chr9 | 36669309 | 36674937 |
| chr9 | 37126311 | 37305714 |
| chr9 | 37126311 | 37327834 |
| chr9 | 37126311 | 37349452 |
| chr9 | 37302187 | 37305714 |
| chr9 | 37302187 | 37349452 |
| chr9 | 37305543 | 37354824 |
| chr9 | 37327798 | 37354824 |
| chr9 | 37424844 | 37426654 |
| chr9 | 37424844 | 37432138 |
| chr9 | 37486702 | 37498224 |
| chr9 | 37489314 | 37493703 |
| chr9 | 37495168 | 37498224 |
| chr9 | 37515903 | 37532058 |
| chr9 | 37521568 | 37541774 |

|      |          |          |
|------|----------|----------|
| chr9 | 37819287 | 37842286 |
| chr9 | 37948634 | 37956054 |
| chr9 | 38575475 | 38578148 |
| chr9 | 3879426  | 3898835  |
| chr9 | 3879426  | 3932470  |
| chr9 | 3932359  | 4125941  |
| chr9 | 40993252 | 40994699 |
| chr9 | 40993252 | 41011730 |
| chr9 | 41008880 | 41011730 |
| chr9 | 41025763 | 41031512 |
| chr9 | 41031370 | 41053899 |
| chr9 | 41953182 | 42013525 |
| chr9 | 4718418  | 4722625  |
| chr9 | 4823547  | 4827033  |
| chr9 | 4823547  | 4849550  |
| chr9 | 5021962  | 5050831  |
| chr9 | 5021962  | 5055788  |
| chr9 | 5064882  | 5081861  |
| chr9 | 539515   | 540667   |
| chr9 | 5656582  | 5690038  |
| chr9 | 5689958  | 5720750  |
| chr9 | 5732387  | 5738538  |
| chr9 | 5732387  | 5757451  |
| chr9 | 5770086  | 5773080  |
| chr9 | 5801175  | 5805785  |
| chr9 | 5810010  | 5824001  |
| chr9 | 6420911  | 6434173  |
| chr9 | 6420911  | 6460791  |
| chr9 | 6460572  | 6475500  |
| chr9 | 6475390  | 6477808  |
| chr9 | 6475390  | 6482099  |
| chr9 | 6477621  | 6482099  |
| chr9 | 6477621  | 6486925  |
| chr9 | 6493825  | 6499931  |
| chr9 | 65682765 | 65693473 |
| chr9 | 65682765 | 65700337 |
| chr9 | 65682765 | 65720092 |
| chr9 | 65690966 | 65708958 |
| chr9 | 6587140  | 6620319  |
| chr9 | 6602108  | 6606669  |
| chr9 | 67173859 | 67201219 |
| chr9 | 67188784 | 67201219 |
| chr9 | 676889   | 731266   |
| chr9 | 6814630  | 6893232  |
| chr9 | 6849506  | 6893232  |



|      |          |          |
|------|----------|----------|
| chr9 | 6880011  | 6893232  |
| chr9 | 69046384 | 69053260 |
| chr9 | 69046384 | 69065035 |
| chr9 | 69220886 | 69240147 |
| chr9 | 69220886 | 69252900 |
| chr9 | 69234438 | 69252900 |
| chr9 | 69236027 | 69237136 |
| chr9 | 69246689 | 69252900 |
| chr9 | 69718649 | 69741858 |
| chr9 | 69723325 | 69750950 |
| chr9 | 69732138 | 69734254 |
| chr9 | 69732138 | 69741858 |
| chr9 | 69732138 | 69750950 |
| chr9 | 6984165  | 7011879  |
| chr9 | 7011697  | 7015929  |
| chr9 | 7011697  | 7049200  |
| chr9 | 7011697  | 7128236  |
| chr9 | 70264303 | 70267975 |
| chr9 | 70267922 | 70278625 |
| chr9 | 70277309 | 70280899 |
| chr9 | 70277309 | 70286271 |
| chr9 | 70280758 | 70282583 |
| chr9 | 70347612 | 70348038 |
| chr9 | 7103684  | 7128236  |
| chr9 | 71740062 | 71750385 |
| chr9 | 71866798 | 71875083 |
| chr9 | 71870082 | 71875083 |
| chr9 | 72360627 | 72363606 |
| chr9 | 734747   | 740934   |
| chr9 | 74996446 | 74999870 |
| chr9 | 74996446 | 75017448 |
| chr9 | 75016267 | 75017448 |
| chr9 | 76067954 | 76107351 |
| chr9 | 77214328 | 77227485 |
| chr9 | 77225925 | 77227485 |
| chr9 | 77225925 | 77228264 |
| chr9 | 77228121 | 77273364 |
| chr9 | 77238001 | 77238386 |
| chr9 | 77238001 | 77260224 |
| chr9 | 77247258 | 77252352 |
| chr9 | 77247258 | 77260224 |
| chr9 | 77247258 | 77283650 |
| chr9 | 77275497 | 77293508 |
| chr9 | 77339515 | 77351446 |
| chr9 | 77381975 | 77407607 |

|      |          |          |
|------|----------|----------|
| chr9 | 77403235 | 77407607 |
| chr9 | 77794462 | 77797648 |
| chr9 | 77794462 | 77815770 |
| chr9 | 78304734 | 78317804 |
| chr9 | 78306313 | 78308583 |
| chr9 | 79612655 | 79654075 |
| chr9 | 79627373 | 79654075 |
| chr9 | 79652589 | 79654075 |
| chr9 | 79652592 | 79654075 |
| chr9 | 79704782 | 79709699 |
| chr9 | 79708117 | 79720293 |
| chr9 | 79709622 | 79721888 |
| chr9 | 81590804 | 81593274 |
| chr9 | 81610219 | 81620557 |
| chr9 | 83290602 | 83313747 |
| chr9 | 83309535 | 83313747 |
| chr9 | 83343189 | 83389708 |
| chr9 | 83663874 | 83678599 |
| chr9 | 83665029 | 83677961 |
| chr9 | 83665029 | 83678599 |
| chr9 | 83677726 | 83678599 |
| chr9 | 83677726 | 83680037 |
| chr9 | 83677726 | 83686155 |
| chr9 | 83678440 | 83683066 |
| chr9 | 83678440 | 83686155 |
| chr9 | 83679774 | 83683066 |
| chr9 | 83679774 | 83686155 |
| chr9 | 83682950 | 83686155 |
| chr9 | 83753257 | 83768970 |
| chr9 | 83768817 | 83788678 |
| chr9 | 83780381 | 83788678 |
| chr9 | 83799184 | 83806560 |
| chr9 | 83908451 | 83915678 |
| chr9 | 83970736 | 83972189 |
| chr9 | 85575314 | 85579096 |
| chr9 | 85575314 | 85633374 |
| chr9 | 85585462 | 85596449 |
| chr9 | 85596361 | 85633374 |
| chr9 | 85596361 | 85646418 |
| chr9 | 85618982 | 85621285 |
| chr9 | 85618982 | 85633374 |
| chr9 | 85618982 | 85657643 |
| chr9 | 85618982 | 85660973 |
| chr9 | 85618982 | 85712566 |
| chr9 | 85632661 | 85657643 |

|      |          |          |
|------|----------|----------|
| chr9 | 85642826 | 85660973 |
| chr9 | 85642826 | 85712566 |
| chr9 | 85655142 | 85692813 |
| chr9 | 85669484 | 85681335 |
| chr9 | 85669484 | 85692813 |
| chr9 | 85669484 | 85712566 |
| chr9 | 85672549 | 85681335 |
| chr9 | 85677435 | 85692813 |
| chr9 | 85677435 | 85712566 |
| chr9 | 85681267 | 85712566 |
| chr9 | 85815878 | 85823080 |
| chr9 | 85822879 | 85829606 |
| chr9 | 85822879 | 85830576 |
| chr9 | 85829462 | 85840849 |
| chr9 | 85956359 | 85962180 |
| chr9 | 85958471 | 85962180 |
| chr9 | 85959792 | 85996577 |
| chr9 | 85962012 | 85978381 |
| chr9 | 85962012 | 86009931 |
| chr9 | 85974966 | 85978381 |
| chr9 | 86013045 | 86018821 |
| chr9 | 86016538 | 86018821 |
| chr9 | 86033281 | 86040868 |
| chr9 | 86033281 | 86046572 |
| chr9 | 86040738 | 86052591 |
| chr9 | 86077411 | 86079341 |
| chr9 | 86303085 | 86304947 |
| chr9 | 86305191 | 86310017 |
| chr9 | 86308428 | 86310017 |
| chr9 | 86308428 | 86322475 |
| chr9 | 86310705 | 86319670 |
| chr9 | 86317218 | 86322475 |
| chr9 | 86343074 | 86346480 |
| chr9 | 86346298 | 86353230 |
| chr9 | 88426381 | 88448989 |
| chr9 | 88426381 | 88462749 |
| chr9 | 88426381 | 88468605 |
| chr9 | 89328659 | 89332986 |
| chr9 | 89396736 | 89418118 |
| chr9 | 91296020 | 91325404 |
| chr9 | 91296020 | 91356155 |
| chr9 | 92034809 | 92038365 |
| chr9 | 92055404 | 92068098 |
| chr9 | 92067965 | 92080963 |
| chr9 | 92222519 | 92229126 |

|      |          |          |
|------|----------|----------|
| chr9 | 92222519 | 92253453 |
| chr9 | 92240855 | 92269983 |
| chr9 | 92242153 | 92269983 |
| chr9 | 92247376 | 92251885 |
| chr9 | 92256679 | 92260234 |
| chr9 | 92256679 | 92269983 |
| chr9 | 92256679 | 92285839 |
| chr9 | 92258853 | 92265553 |
| chr9 | 92262968 | 92265553 |
| chr9 | 92264928 | 92265553 |
| chr9 | 92265479 | 92269983 |
| chr9 | 92268173 | 92269983 |
| chr9 | 92268173 | 92285839 |
| chr9 | 92268173 | 92288282 |
| chr9 | 92277862 | 92289426 |
| chr9 | 92285721 | 92288282 |
| chr9 | 92285721 | 92289426 |
| chr9 | 92287790 | 92288282 |
| chr9 | 92299889 | 92305830 |
| chr9 | 92310170 | 92311259 |
| chr9 | 92640709 | 92652639 |
| chr9 | 92648058 | 92658681 |
| chr9 | 92813595 | 92822277 |
| chr9 | 92855810 | 92856318 |
| chr9 | 93471140 | 93476338 |
| chr9 | 93471140 | 93497599 |
| chr9 | 93471140 | 93498886 |
| chr9 | 93471140 | 93516269 |
| chr9 | 93471140 | 93532329 |
| chr9 | 93476255 | 93497599 |
| chr9 | 93476255 | 93498886 |
| chr9 | 93476255 | 93516269 |
| chr9 | 93476255 | 93532329 |
| chr9 | 93497470 | 93498886 |
| chr9 | 93497470 | 93529580 |
| chr9 | 93515669 | 93516269 |
| chr9 | 93527154 | 93550691 |
| chr9 | 93556381 | 93561250 |
| chr9 | 93561108 | 93562304 |
| chr9 | 93629969 | 93636525 |
| chr9 | 93674926 | 93676963 |
| chr9 | 94064733 | 94088263 |
| chr9 | 94064733 | 94095454 |
| chr9 | 94085250 | 94088263 |
| chr9 | 94278757 | 94293069 |

|      |          |          |
|------|----------|----------|
| chr9 | 94415157 | 94441099 |
| chr9 | 94438400 | 94441099 |
| chr9 | 94438400 | 94446936 |
| chr9 | 94440984 | 94451527 |
| chr9 | 94759648 | 94792918 |
| chr9 | 94773001 | 94801002 |
| chr9 | 94792764 | 94801002 |
| chr9 | 94923985 | 94928531 |
| chr9 | 94923985 | 94956015 |
| chr9 | 94923985 | 94967801 |
| chr9 | 94955176 | 95005616 |
| chr9 | 95107065 | 95111637 |
| chr9 | 95111462 | 95172147 |
| chr9 | 95125085 | 95150087 |
| chr9 | 95135345 | 95172147 |
| chr9 | 95240648 | 95249369 |
| chr9 | 95247431 | 95249369 |
| chr9 | 95476033 | 95485874 |
| chr9 | 95880868 | 95907271 |
| chr9 | 95897848 | 95921315 |
| chr9 | 95897848 | 95928864 |
| chr9 | 95897848 | 95941549 |
| chr9 | 95897848 | 95956013 |
| chr9 | 95907077 | 95916434 |
| chr9 | 95907077 | 95921315 |
| chr9 | 95907077 | 95928864 |
| chr9 | 95921174 | 95941549 |
| chr9 | 95928078 | 95941549 |
| chr9 | 95928078 | 95970656 |
| chr9 | 95978060 | 96004701 |
| chr9 | 96320997 | 96324169 |
| chr9 | 96336716 | 96352109 |
| chr9 | 96343903 | 96352109 |
| chr9 | 96360153 | 96368305 |
| chr9 | 96392397 | 96398314 |
| chr9 | 96458378 | 96465498 |
| chr9 | 96458378 | 96465778 |
| chr9 | 96458378 | 96471094 |
| chr9 | 96458378 | 96484633 |
| chr9 | 96465336 | 96465778 |
| chr9 | 96465336 | 96471094 |
| chr9 | 96465336 | 96484633 |
| chr9 | 96509672 | 96565483 |
| chr9 | 96522505 | 96534542 |
| chr9 | 96522505 | 96565483 |

|      |           |           |
|------|-----------|-----------|
| chr9 | 96533926  | 96534542  |
| chr9 | 96533926  | 96541892  |
| chr9 | 96533926  | 96565483  |
| chr9 | 96539077  | 96565483  |
| chr9 | 96541825  | 96565483  |
| chr9 | 96551795  | 96565483  |
| chr9 | 96562692  | 96565483  |
| chr9 | 96774787  | 96776245  |
| chr9 | 96827079  | 96845016  |
| chr9 | 96827079  | 96852005  |
| chr9 | 96827079  | 96853069  |
| chr9 | 96949554  | 96972948  |
| chr9 | 97034725  | 97035693  |
| chr9 | 97276568  | 97281669  |
| chr9 | 97347313  | 97350555  |
| chr9 | 97354568  | 97357725  |
| chr9 | 97369921  | 97371706  |
| chr9 | 97439244  | 97441875  |
| chr9 | 97610345  | 97611699  |
| chr9 | 97647491  | 97648223  |
| chr9 | 97647491  | 97654944  |
| chr9 | 97653797  | 97656085  |
| chr9 | 97994630  | 98005153  |
| chr9 | 97994630  | 98012472  |
| chr9 | 98076917  | 98078347  |
| chr9 | 98091908  | 98095029  |
| chr9 | 98091908  | 98100164  |
| chr9 | 98128606  | 98157660  |
| chr9 | 98201478  | 98221228  |
| chr9 | 98213107  | 98221228  |
| chr9 | 98745558  | 98771046  |
| chr9 | 98751028  | 98771046  |
| chr9 | 98777404  | 98782573  |
| chr9 | 98780188  | 98782573  |
| chr9 | 99832688  | 99833454  |
| chr9 | 99844648  | 99847615  |
| chr9 | 99915177  | 99928843  |
| chrX | 100689855 | 100691209 |
| chrX | 100823885 | 100832909 |
| chrX | 10090770  | 10098579  |
| chrX | 101018970 | 101019403 |
| chrX | 101018970 | 101020588 |
| chrX | 101018970 | 101023616 |
| chrX | 101020486 | 101038051 |
| chrX | 101021967 | 101023616 |

|      |           |           |
|------|-----------|-----------|
| chrX | 101035612 | 101038051 |
| chrX | 101035612 | 101041371 |
| chrX | 101035612 | 101042312 |
| chrX | 101037916 | 101042312 |
| chrX | 101041316 | 101042312 |
| chrX | 101101057 | 101102411 |
| chrX | 101101057 | 101109998 |
| chrX | 101101057 | 101120784 |
| chrX | 101101057 | 101127665 |
| chrX | 101101057 | 101132456 |
| chrX | 101120401 | 101148161 |
| chrX | 101126708 | 101146277 |
| chrX | 101126708 | 101148161 |
| chrX | 101127137 | 101130073 |
| chrX | 101127137 | 101148161 |
| chrX | 101129981 | 101145199 |
| chrX | 10482479  | 10495691  |
| chrX | 106853520 | 106854296 |
| chrX | 106978079 | 106986200 |
| chrX | 106985095 | 106986200 |
| chrX | 107067555 | 107069402 |
| chrX | 107147742 | 107153503 |
| chrX | 107526581 | 107530511 |
| chrX | 107639294 | 107641000 |
| chrX | 107639294 | 107642490 |
| chrX | 107639294 | 107647765 |
| chrX | 107840669 | 107854704 |
| chrX | 107840669 | 107905626 |
| chrX | 107903957 | 107917649 |
| chrX | 108170608 | 108188677 |
| chrX | 108595508 | 108597568 |
| chrX | 108595508 | 108603061 |
| chrX | 108598701 | 108603061 |
| chrX | 108601392 | 108655457 |
| chrX | 108620258 | 108626349 |
| chrX | 109659353 | 109683666 |
| chrX | 109668100 | 109669173 |
| chrX | 109674401 | 109678415 |
| chrX | 109674401 | 109682896 |
| chrX | 111730524 | 111736879 |
| chrX | 112804946 | 112815877 |
| chrX | 115122526 | 115130199 |
| chrX | 115122526 | 115150070 |
| chrX | 115629197 | 115640503 |
| chrX | 115629197 | 115643508 |

|      |           |           |
|------|-----------|-----------|
| chrX | 115646401 | 115648017 |
| chrX | 11760402  | 11762252  |
| chrX | 11762129  | 11762997  |
| chrX | 118378418 | 118393271 |
| chrX | 118387339 | 118398470 |
| chrX | 118387339 | 118410959 |
| chrX | 118392631 | 118395344 |
| chrX | 118392631 | 118398470 |
| chrX | 118394054 | 118404444 |
| chrX | 118394054 | 118407026 |
| chrX | 118394054 | 118444494 |
| chrX | 118396969 | 118398470 |
| chrX | 118396969 | 118407026 |
| chrX | 118396969 | 118441559 |
| chrX | 118398386 | 118404444 |
| chrX | 118404337 | 118407026 |
| chrX | 118404337 | 118410959 |
| chrX | 118441367 | 118442345 |
| chrX | 118441367 | 118443687 |
| chrX | 118441367 | 118444494 |
| chrX | 118442243 | 118444494 |
| chrX | 118542724 | 118543593 |
| chrX | 118542724 | 118546116 |
| chrX | 118654601 | 118654961 |
| chrX | 118741016 | 118761289 |
| chrX | 118741016 | 118766976 |
| chrX | 118741016 | 118776511 |
| chrX | 118746953 | 118766976 |
| chrX | 118749657 | 118776511 |
| chrX | 118758054 | 118766976 |
| chrX | 118766529 | 118776511 |
| chrX | 119406459 | 119410362 |
| chrX | 119542504 | 119545504 |
| chrX | 119625334 | 119633492 |
| chrX | 119640691 | 119653040 |
| chrX | 119640691 | 119663677 |
| chrX | 119843190 | 119851601 |
| chrX | 119931935 | 119936682 |
| chrX | 119936296 | 119938810 |
| chrX | 120447840 | 120449128 |
| chrX | 120447840 | 120455570 |
| chrX | 120532421 | 120534586 |
| chrX | 120534480 | 120535943 |
| chrX | 123610917 | 123613708 |
| chrX | 123613638 | 123614189 |



|      |           |           |
|------|-----------|-----------|
| chrX | 123622757 | 123624669 |
| chrX | 123625911 | 123627968 |
| chrX | 123631687 | 123639027 |
| chrX | 123633952 | 123639027 |
| chrX | 123665641 | 123671761 |
| chrX | 123665641 | 123686714 |
| chrX | 123665641 | 123703505 |
| chrX | 123671668 | 123686714 |
| chrX | 123671668 | 123697751 |
| chrX | 123686547 | 123697751 |
| chrX | 123686547 | 123703505 |
| chrX | 123686547 | 123706949 |
| chrX | 123686547 | 123712908 |
| chrX | 123696020 | 123712908 |
| chrX | 123885630 | 123892773 |
| chrX | 123885630 | 123900693 |
| chrX | 123888618 | 123892773 |
| chrX | 123888618 | 123900693 |
| chrX | 124021366 | 124031125 |
| chrX | 124021366 | 124037623 |
| chrX | 124021366 | 124042645 |
| chrX | 124022530 | 124042645 |
| chrX | 124068563 | 124078058 |
| chrX | 124068563 | 124081528 |
| chrX | 124071148 | 124095449 |
| chrX | 124081379 | 124086770 |
| chrX | 12799206  | 12810146  |
| chrX | 1282677   | 1290509   |
| chrX | 1282677   | 1300626   |
| chrX | 1285777   | 1290509   |
| chrX | 1288518   | 1288888   |
| chrX | 1288518   | 1290509   |
| chrX | 129465519 | 129471326 |
| chrX | 129465519 | 129481185 |
| chrX | 129480700 | 129516497 |
| chrX | 129490059 | 129511983 |
| chrX | 129515686 | 129518447 |
| chrX | 129548562 | 129559001 |
| chrX | 129557324 | 129559001 |
| chrX | 129557324 | 129569399 |
| chrX | 129558632 | 129559001 |
| chrX | 129558839 | 129562786 |
| chrX | 129558839 | 129569399 |
| chrX | 129558839 | 129575250 |
| chrX | 129565771 | 129569399 |

|      |           |           |
|------|-----------|-----------|
| chrX | 129810904 | 129811509 |
| chrX | 129823678 | 129829141 |
| chrX | 129908059 | 129911921 |
| chrX | 129919174 | 129921587 |
| chrX | 130005187 | 130016213 |
| chrX | 130069299 | 130072417 |
| chrX | 130071039 | 130072417 |
| chrX | 130074048 | 130074752 |
| chrX | 130139794 | 130156603 |
| chrX | 130226758 | 130260465 |
| chrX | 130236213 | 130247005 |
| chrX | 130656580 | 130679748 |
| chrX | 131709497 | 131794466 |
| chrX | 131749305 | 131756709 |
| chrX | 131749305 | 131768696 |
| chrX | 131749305 | 131784039 |
| chrX | 131749305 | 131794466 |
| chrX | 131755597 | 131784039 |
| chrX | 131768548 | 131784039 |
| chrX | 131768548 | 131794466 |
| chrX | 131783886 | 131794466 |
| chrX | 134377571 | 134378106 |
| chrX | 134377571 | 134393634 |
| chrX | 134377571 | 134425330 |
| chrX | 134413490 | 134417302 |
| chrX | 134473358 | 134475364 |
| chrX | 134473358 | 134493590 |
| chrX | 134473358 | 134498436 |
| chrX | 134473358 | 134498684 |
| chrX | 134781820 | 134789266 |
| chrX | 134804100 | 134807708 |
| chrX | 135545422 | 135549805 |
| chrX | 135545422 | 135552146 |
| chrX | 135545422 | 135556300 |
| chrX | 136022585 | 136033493 |
| chrX | 136219397 | 136222486 |
| chrX | 136236243 | 136241277 |
| chrX | 136241159 | 136244795 |
| chrX | 136872267 | 136875585 |
| chrX | 13735247  | 13749533  |
| chrX | 13736477  | 13744519  |
| chrX | 139737915 | 139757867 |
| chrX | 139757807 | 139774953 |
| chrX | 139768259 | 139785299 |
| chrX | 139782546 | 139787244 |

|      |           |           |
|------|-----------|-----------|
| chrX | 139802235 | 139826823 |
| chrX | 139814877 | 139826823 |
| chrX | 1412731   | 1439144   |
| chrX | 1421657   | 1425687   |
| chrX | 1421657   | 1428121   |
| chrX | 1425524   | 1439144   |
| chrX | 1435021   | 1439144   |
| chrX | 147921932 | 147932763 |
| chrX | 147925539 | 147932763 |
| chrX | 147928321 | 147945616 |
| chrX | 147940575 | 147945616 |
| chrX | 14850504  | 14859334  |
| chrX | 148651998 | 148662768 |
| chrX | 149490313 | 149501037 |
| chrX | 150445453 | 150471490 |
| chrX | 150462771 | 150473802 |
| chrX | 150462771 | 150510046 |
| chrX | 150592604 | 150619139 |
| chrX | 150596497 | 150619139 |
| chrX | 150614588 | 150619139 |
| chrX | 150614588 | 150641418 |
| chrX | 150619037 | 150658027 |
| chrX | 150638942 | 150649901 |
| chrX | 150657820 | 150660484 |
| chrX | 150699194 | 150718700 |
| chrX | 150699194 | 150732730 |
| chrX | 150699194 | 150750843 |
| chrX | 150718624 | 150744453 |
| chrX | 150718624 | 150755865 |
| chrX | 150727214 | 150732730 |
| chrX | 150727214 | 150737448 |
| chrX | 150727214 | 150750843 |
| chrX | 150736594 | 150737448 |
| chrX | 150793690 | 150795486 |
| chrX | 150793690 | 150816078 |
| chrX | 152189729 | 152208144 |
| chrX | 152284667 | 152364596 |
| chrX | 152345580 | 152364596 |
| chrX | 152846281 | 152850423 |
| chrX | 152846281 | 152858916 |
| chrX | 152963838 | 152970541 |
| chrX | 153594546 | 153596187 |
| chrX | 153702006 | 153704094 |
| chrX | 153787822 | 153789824 |
| chrX | 153789711 | 153790851 |

|      |           |           |
|------|-----------|-----------|
| chrX | 153796433 | 153798136 |
| chrX | 153963224 | 153964726 |
| chrX | 154016031 | 154017067 |
| chrX | 15425905  | 15459740  |
| chrX | 154351580 | 154368090 |
| chrX | 154354824 | 154357623 |
| chrX | 154361307 | 154361787 |
| chrX | 154361669 | 154362784 |
| chrX | 154361978 | 154362332 |
| chrX | 154364820 | 154368090 |
| chrX | 154366307 | 154367544 |
| chrX | 154399337 | 154399941 |
| chrX | 154399486 | 154399941 |
| chrX | 154399486 | 154400626 |
| chrX | 154413206 | 154420735 |
| chrX | 154413481 | 154419623 |
| chrX | 154446414 | 154449297 |
| chrX | 154507405 | 154515812 |
| chrX | 154512313 | 154512936 |
| chrX | 154556164 | 154560559 |
| chrX | 15455847  | 15459740  |
| chrX | 154695916 | 154700059 |
| chrX | 154712228 | 154716329 |
| chrX | 154764898 | 154767382 |
| chrX | 154764898 | 154770879 |
| chrX | 154765906 | 154768432 |
| chrX | 154768301 | 154770879 |
| chrX | 154789953 | 154792285 |
| chrX | 155116056 | 155120168 |
| chrX | 155506897 | 155514265 |
| chrX | 155506897 | 155524632 |
| chrX | 155506897 | 155545277 |
| chrX | 155511672 | 155545277 |
| chrX | 155889457 | 155900587 |
| chrX | 155898111 | 155919880 |
| chrX | 15764577  | 15774397  |
| chrX | 1593443   | 1595532   |
| chrX | 16667513  | 16702941  |
| chrX | 16678361  | 16683226  |
| chrX | 16693140  | 16693487  |
| chrX | 16693140  | 16702941  |
| chrX | 16698235  | 16702941  |
| chrX | 16818573  | 16820255  |
| chrX | 16852045  | 16853842  |
| chrX | 16857593  | 16869220  |

|      |          |          |
|------|----------|----------|
| chrX | 17687741 | 17692468 |
| chrX | 18247768 | 18257030 |
| chrX | 18256847 | 18260291 |
| chrX | 18256847 | 18265802 |
| chrX | 18265584 | 18305215 |
| chrX | 18304971 | 18334095 |
| chrX | 18442374 | 18510854 |
| chrX | 18506934 | 18510854 |
| chrX | 18575353 | 18588143 |
| chrX | 18608810 | 18619966 |
| chrX | 18905757 | 18910960 |
| chrX | 18948743 | 18954412 |
| chrX | 19349311 | 19350110 |
| chrX | 19349311 | 19353173 |
| chrX | 19392001 | 19400663 |
| chrX | 19398225 | 19400663 |
| chrX | 19407187 | 19415257 |
| chrX | 19407187 | 19457019 |
| chrX | 19425530 | 19464406 |
| chrX | 19456912 | 19464406 |
| chrX | 19541924 | 19546050 |
| chrX | 19588642 | 19595000 |
| chrX | 19588642 | 19645475 |
| chrX | 19607937 | 19684028 |
| chrX | 19683822 | 19695741 |
| chrX | 19695611 | 19836282 |
| chrX | 19929784 | 19935898 |
| chrX | 19950752 | 19955566 |
| chrX | 20162963 | 20167747 |
| chrX | 20172745 | 20177084 |
| chrX | 20186295 | 20195145 |
| chrX | 20186295 | 20204103 |
| chrX | 20186295 | 20209404 |
| chrX | 20193486 | 20204103 |
| chrX | 20204021 | 20234814 |
| chrX | 21516484 | 21532067 |
| chrX | 21516484 | 21563452 |
| chrX | 21526866 | 21532067 |
| chrX | 21851508 | 21853503 |
| chrX | 21868466 | 21869678 |
| chrX | 21878041 | 21878692 |
| chrX | 21971896 | 21972571 |
| chrX | 2243022  | 2291603  |
| chrX | 2266739  | 2291603  |
| chrX | 2266739  | 2425304  |

|      |          |          |
|------|----------|----------|
| chrX | 23679164 | 23683705 |
| chrX | 23704693 | 23706739 |
| chrX | 23707876 | 23722753 |
| chrX | 23713134 | 23722753 |
| chrX | 23713134 | 23730564 |
| chrX | 23721880 | 23736016 |
| chrX | 23722669 | 23733217 |
| chrX | 23730526 | 23733217 |
| chrX | 23856301 | 23868688 |
| chrX | 24057420 | 24057754 |
| chrX | 24057420 | 24060182 |
| chrX | 24064200 | 24068108 |
| chrX | 24064200 | 24071727 |
| chrX | 24065997 | 24071727 |
| chrX | 2408744  | 2425304  |
| chrX | 24172714 | 24179770 |
| chrX | 24494741 | 24505298 |
| chrX | 24518932 | 24534068 |
| chrX | 24723154 | 24748992 |
| chrX | 24732369 | 24743329 |
| chrX | 24745417 | 24843677 |
| chrX | 24809897 | 24826601 |
| chrX | 24809897 | 24843677 |
| chrX | 24814978 | 24821583 |
| chrX | 24814978 | 24843677 |
| chrX | 24821451 | 24843677 |
| chrX | 24821451 | 24888122 |
| chrX | 24841651 | 24843677 |
| chrX | 2610995  | 2626642  |
| chrX | 2612149  | 2626642  |
| chrX | 2615815  | 2626642  |
| chrX | 2618739  | 2626642  |
| chrX | 2719660  | 2726373  |
| chrX | 2722626  | 2726373  |
| chrX | 2915555  | 2918227  |
| chrX | 30665510 | 30677452 |
| chrX | 30859486 | 30871801 |
| chrX | 338603   | 341931   |
| chrX | 338603   | 347693   |
| chrX | 338603   | 361590   |
| chrX | 345515   | 347693   |
| chrX | 345515   | 361590   |
| chrX | 3621258  | 3641971  |
| chrX | 3626418  | 3641971  |
| chrX | 37386598 | 37426000 |

|      |          |          |
|------|----------|----------|
| chrX | 37406208 | 37426000 |
| chrX | 40062138 | 40064599 |
| chrX | 40588985 | 40599741 |
| chrX | 40659226 | 40659607 |
| chrX | 40679863 | 40688530 |
| chrX | 40712913 | 40729345 |
| chrX | 41128999 | 41134837 |
| chrX | 41144521 | 41151057 |
| chrX | 41196250 | 41205493 |
| chrX | 41198527 | 41210682 |
| chrX | 41205302 | 41219231 |
| chrX | 41210508 | 41219231 |
| chrX | 41223216 | 41225137 |
| chrX | 41542690 | 41671530 |
| chrX | 41626603 | 41671530 |
| chrX | 41660438 | 41671530 |
| chrX | 44961283 | 45020730 |
| chrX | 45010960 | 45020730 |
| chrX | 45010960 | 45037689 |
| chrX | 45034930 | 45053955 |
| chrX | 45051708 | 45063817 |
| chrX | 46620976 | 46648797 |
| chrX | 46669606 | 46682535 |
| chrX | 46984883 | 46998277 |
| chrX | 46984883 | 47033788 |
| chrX | 47024723 | 47028103 |
| chrX | 47846104 | 47895940 |
| chrX | 48575167 | 48577109 |
| chrX | 48576313 | 48576604 |
| chrX | 48934463 | 48935018 |
| chrX | 48976017 | 48997357 |
| chrX | 49115725 | 49117810 |
| chrX | 49115725 | 49119814 |
| chrX | 49115725 | 49122776 |
| chrX | 49242015 | 49243462 |
| chrX | 51895052 | 51897271 |
| chrX | 52955153 | 52956755 |
| chrX | 53217142 | 53218398 |
| chrX | 53394777 | 53396617 |
| chrX | 53403565 | 53403893 |
| chrX | 53405011 | 53405391 |
| chrX | 53409061 | 53409503 |
| chrX | 53414757 | 53415169 |
| chrX | 53535383 | 53539080 |
| chrX | 53539656 | 53542539 |

|      |          |          |
|------|----------|----------|
| chrX | 53539656 | 53549505 |
| chrX | 53557381 | 53558809 |
| chrX | 53557381 | 53559060 |
| chrX | 53557381 | 53560416 |
| chrX | 53561755 | 53562244 |
| chrX | 53561755 | 53562929 |
| chrX | 53568691 | 53569827 |
| chrX | 53580830 | 53583916 |
| chrX | 53595186 | 53607699 |
| chrX | 53600117 | 53604834 |
| chrX | 53614533 | 53615835 |
| chrX | 53615743 | 53617446 |
| chrX | 53616969 | 53617446 |
| chrX | 53624594 | 53631034 |
| chrX | 53632486 | 53680186 |
| chrX | 53645310 | 53654131 |
| chrX | 53987077 | 53987944 |
| chrX | 54022258 | 54022843 |
| chrX | 54253958 | 54259338 |
| chrX | 54465450 | 54465852 |
| chrX | 54467783 | 54471487 |
| chrX | 55729293 | 55731586 |
| chrX | 55729293 | 55757331 |
| chrX | 63655493 | 63678572 |
| chrX | 63665885 | 63678572 |
| chrX | 63665885 | 63706449 |
| chrX | 63665885 | 63724711 |
| chrX | 63674037 | 63724711 |
| chrX | 63697124 | 63706449 |
| chrX | 63697124 | 63724711 |
| chrX | 64328771 | 64337393 |
| chrX | 64331556 | 64337393 |
| chrX | 64345044 | 64359527 |
| chrX | 64348659 | 64350070 |
| chrX | 64348659 | 64359527 |
| chrX | 64349941 | 64359527 |
| chrX | 64354776 | 64356338 |
| chrX | 65523559 | 65532630 |
| chrX | 68048415 | 68073299 |
| chrX | 68052539 | 68053810 |
| chrX | 68052539 | 68073299 |
| chrX | 68063853 | 68073299 |
| chrX | 68063853 | 68113239 |
| chrX | 68096869 | 68113239 |
| chrX | 68096869 | 68194498 |



|      |          |          |
|------|----------|----------|
| chrX | 68096869 | 68206673 |
| chrX | 68096869 | 68299096 |
| chrX | 68111853 | 68119332 |
| chrX | 68111853 | 68194498 |
| chrX | 68192918 | 68201710 |
| chrX | 68192918 | 68206673 |
| chrX | 68192918 | 68210282 |
| chrX | 68192918 | 68212212 |
| chrX | 68192918 | 68299096 |
| chrX | 68234486 | 68299096 |
| chrX | 68274737 | 68299096 |
| chrX | 68511848 | 68513405 |
| chrX | 68511848 | 68521497 |
| chrX | 68511848 | 68522917 |
| chrX | 68513326 | 68521497 |
| chrX | 68513326 | 68522917 |
| chrX | 70146632 | 70150322 |
| chrX | 70148760 | 70150322 |
| chrX | 70290437 | 70290805 |
| chrX | 70290437 | 70302398 |
| chrX | 70296997 | 70302398 |
| chrX | 70296997 | 70333689 |
| chrX | 70329404 | 70333689 |
| chrX | 70341798 | 70353807 |
| chrX | 70341798 | 70376210 |
| chrX | 70341798 | 70387297 |
| chrX | 70386617 | 70404034 |
| chrX | 70404714 | 70407075 |
| chrX | 70406258 | 70407075 |
| chrX | 71137557 | 71137943 |
| chrX | 71290628 | 71294528 |
| chrX | 71368053 | 71375286 |
| chrX | 71368053 | 71387461 |
| chrX | 71381742 | 71387461 |
| chrX | 71381742 | 71389665 |
| chrX | 71383961 | 71389665 |
| chrX | 71397252 | 71398737 |
| chrX | 71397252 | 71401739 |
| chrX | 71398571 | 71401739 |
| chrX | 71398571 | 71408151 |
| chrX | 71421308 | 71424238 |
| chrX | 71423116 | 71424238 |
| chrX | 71536177 | 71538072 |
| chrX | 71536177 | 71544635 |
| chrX | 71555953 | 71557672 |

|      |          |          |
|------|----------|----------|
| chrX | 71556679 | 71564753 |
| chrX | 72273800 | 72276234 |
| chrX | 72275543 | 72276234 |
| chrX | 72351732 | 72464731 |
| chrX | 72462003 | 72464731 |
| chrX | 72462003 | 72489041 |
| chrX | 72462003 | 72491006 |
| chrX | 72462003 | 72495268 |
| chrX | 72488932 | 72495268 |
| chrX | 72490928 | 72495268 |
| chrX | 72567888 | 72568884 |
| chrX | 72602157 | 72605619 |
| chrX | 72605270 | 72619305 |
| chrX | 72635154 | 72636386 |
| chrX | 72656119 | 72676150 |
| chrX | 72666150 | 72667473 |
| chrX | 73577406 | 73584572 |
| chrX | 75060222 | 75070522 |
| chrX | 75065069 | 75069136 |
| chrX | 75098941 | 75114834 |
| chrX | 75112885 | 75114834 |
| chrX | 75379119 | 75431520 |
| chrX | 75417086 | 75431520 |
| chrX | 75417086 | 75505847 |
| chrX | 75421863 | 75431520 |
| chrX | 75450801 | 75505847 |
| chrX | 77520787 | 77593849 |
| chrX | 77557450 | 77558846 |
| chrX | 77557450 | 77574358 |
| chrX | 77557450 | 77593849 |
| chrX | 77557450 | 77600564 |
| chrX | 77574249 | 77593849 |
| chrX | 77599410 | 77616730 |
| chrX | 77616612 | 77620532 |
| chrX | 77654097 | 77664778 |
| chrX | 77663381 | 77664778 |
| chrX | 77663381 | 77676298 |
| chrX | 77688817 | 77696704 |
| chrX | 77688817 | 77698629 |
| chrX | 77688817 | 77717243 |
| chrX | 77830804 | 77841320 |
| chrX | 77856732 | 77857497 |
| chrX | 77870807 | 77875597 |
| chrX | 77988241 | 78003236 |
| chrX | 78012878 | 78020398 |

|      |          |          |
|------|----------|----------|
| chrX | 78014661 | 78020398 |
| chrX | 78109866 | 78114160 |
| chrX | 78113743 | 78114160 |
| chrX | 78122834 | 78123374 |
| chrX | 78122834 | 78125425 |
| chrX | 78133337 | 78138098 |
| chrX | 80288905 | 80291024 |
| chrX | 80288905 | 80310233 |
| chrX | 80289663 | 80310233 |
| chrX | 80695907 | 80736088 |
| chrX | 80699956 | 80704846 |
| chrX | 80707426 | 80719656 |
| chrX | 80716156 | 80736088 |
| chrX | 80719488 | 80730020 |
| chrX | 80728751 | 80793772 |
| chrX | 80735987 | 80793772 |
| chrX | 80744031 | 80745729 |
| chrX | 80744031 | 80793772 |
| chrX | 80791853 | 80793772 |
| chrX | 84145477 | 84164387 |
| chrX | 84333758 | 84361612 |
| chrX | 84344249 | 84361612 |
| chrX | 84468471 | 84475397 |
| chrX | 85046445 | 85055925 |
| chrX | 85067126 | 85074391 |
| chrX | 85255258 | 85270146 |
| chrX | 85873051 | 85911338 |
| chrX | 85873051 | 85964052 |
| chrX | 85956152 | 85964052 |
| chrX | 85978766 | 86027557 |
| chrX | 96735757 | 96738762 |
| chrX | 9684042  | 9697429  |
| chrX | 9688016  | 9692254  |
| chrX | 9688016  | 9697429  |
| chrX | 96881578 | 96918617 |
| chrX | 96912327 | 96918617 |
| chrX | 96912327 | 96930843 |
| chrX | 9691578  | 9692254  |
| chrX | 96930732 | 96945591 |
| chrX | 96937232 | 96945591 |
| chrX | 96937232 | 96965207 |
| chrX | 96937232 | 97075261 |
| chrX | 96939265 | 97247839 |
| chrX | 96948934 | 96965207 |
| chrX | 97072940 | 97075261 |

|      |          |          |
|------|----------|----------|
| chrX | 97099693 | 97114965 |
| chrX | 97114725 | 97348280 |
| chrX | 97247714 | 97348280 |

**Intron (3321)**

|       |           |           |
|-------|-----------|-----------|
| chr10 | 100221357 | 100221747 |
| chr10 | 100917035 | 100924289 |
| chr10 | 102109424 | 102109674 |
| chr10 | 1022562   | 1026820   |
| chr10 | 102482010 | 102483098 |
| chr10 | 102487935 | 102489553 |
| chr10 | 103178796 | 103179036 |
| chr10 | 103389417 | 103390429 |
| chr10 | 103390030 | 103390521 |
| chr10 | 103410745 | 103410935 |
| chr10 | 103602610 | 103603852 |
| chr10 | 1056347   | 1069552   |
| chr10 | 11475531  | 11476966  |
| chr10 | 118744925 | 118745319 |
| chr10 | 119160438 | 119160705 |
| chr10 | 119213418 | 119214069 |
| chr10 | 119575690 | 119580538 |
| chr10 | 12077519  | 12078146  |
| chr10 | 122488714 | 122492038 |
| chr10 | 12372540  | 12373719  |
| chr10 | 12397268  | 12403369  |
| chr10 | 12400015  | 12403369  |
| chr10 | 12400015  | 12403411  |
| chr10 | 12400720  | 12403369  |
| chr10 | 12400720  | 12403411  |
| chr10 | 12403101  | 12406177  |
| chr10 | 12403101  | 12406326  |
| chr10 | 12406177  | 12432033  |
| chr10 | 124462502 | 124462962 |
| chr10 | 124759999 | 124765578 |
| chr10 | 124777061 | 124777777 |
| chr10 | 124807560 | 124815997 |
| chr10 | 124940373 | 124962408 |
| chr10 | 124940373 | 124994706 |
| chr10 | 124942456 | 124962408 |
| chr10 | 125069386 | 125070892 |
| chr10 | 125074742 | 125111882 |
| chr10 | 125074742 | 125122868 |
| chr10 | 125074742 | 125138986 |
| chr10 | 127000174 | 127012312 |
| chr10 | 127051841 | 127052273 |

|       |           |           |
|-------|-----------|-----------|
| chr10 | 127924270 | 127967074 |
| chr10 | 133491221 | 133556677 |
| chr10 | 13849756  | 13849937  |
| chr10 | 18513405  | 18551939  |
| chr10 | 18553509  | 18562797  |
| chr10 | 18556308  | 18558216  |
| chr10 | 18601787  | 18603702  |
| chr10 | 18603780  | 18603923  |
| chr10 | 21085109  | 21088333  |
| chr10 | 21826160  | 21826400  |
| chr10 | 21875847  | 21876220  |
| chr10 | 245900    | 263658    |
| chr10 | 245900    | 267102    |
| chr10 | 27143009  | 27143446  |
| chr10 | 27175450  | 27175826  |
| chr10 | 27197902  | 27198872  |
| chr10 | 30313890  | 30349277  |
| chr10 | 30970906  | 30974652  |
| chr10 | 30972169  | 30974652  |
| chr10 | 31355143  | 31358333  |
| chr10 | 31355143  | 31387266  |
| chr10 | 31355146  | 31387266  |
| chr10 | 31373017  | 31387266  |
| chr10 | 31373017  | 31387798  |
| chr10 | 31373017  | 31389695  |
| chr10 | 31373017  | 31391224  |
| chr10 | 31373121  | 31387266  |
| chr10 | 31387123  | 31387798  |
| chr10 | 31901744  | 31902084  |
| chr10 | 319207    | 320648    |
| chr10 | 33280904  | 33281159  |
| chr10 | 34356762  | 34357261  |
| chr10 | 34493285  | 34493725  |
| chr10 | 34799340  | 34799743  |
| chr10 | 35030505  | 35030791  |
| chr10 | 35080585  | 35080982  |
| chr10 | 35375404  | 35375885  |
| chr10 | 35434112  | 35435247  |
| chr10 | 37853230  | 37853628  |
| chr10 | 37952962  | 37972021  |
| chr10 | 42802079  | 42810193  |
| chr10 | 49960135  | 49969883  |
| chr10 | 50885237  | 50943674  |
| chr10 | 545404    | 546112    |
| chr10 | 5689285   | 5714207   |

|       |          |          |
|-------|----------|----------|
| chr10 | 5699524  | 5714207  |
| chr10 | 5709529  | 5714207  |
| chr10 | 5718649  | 5719456  |
| chr10 | 5730915  | 5742364  |
| chr10 | 5783323  | 5812601  |
| chr10 | 5801206  | 5801463  |
| chr10 | 584823   | 585703   |
| chr10 | 5884654  | 5885290  |
| chr10 | 63271995 | 63272361 |
| chr10 | 63453395 | 63508047 |
| chr10 | 65585484 | 65585802 |
| chr10 | 65585484 | 65670844 |
| chr10 | 65637869 | 65699112 |
| chr10 | 68127282 | 68131112 |
| chr10 | 68391865 | 68392158 |
| chr10 | 68416664 | 68430660 |
| chr10 | 68454728 | 68455048 |
| chr10 | 68504279 | 68505542 |
| chr10 | 68522737 | 68523199 |
| chr10 | 68577716 | 68586272 |
| chr10 | 68761575 | 68762041 |
| chr10 | 68922534 | 68923054 |
| chr10 | 68966203 | 68966537 |
| chr10 | 68974915 | 68975935 |
| chr10 | 69916483 | 70007536 |
| chr10 | 71977570 | 71978126 |
| chr10 | 72339946 | 72340163 |
| chr10 | 72708282 | 72741845 |
| chr10 | 72708282 | 72742273 |
| chr10 | 72708282 | 72790331 |
| chr10 | 72736484 | 72742273 |
| chr10 | 72741721 | 72742273 |
| chr10 | 73129422 | 73129759 |
| chr10 | 73176061 | 73186478 |
| chr10 | 73182959 | 73186478 |
| chr10 | 73484975 | 73486415 |
| chr10 | 73831824 | 73832388 |
| chr10 | 74022453 | 74022731 |
| chr10 | 74057200 | 74057677 |
| chr10 | 74240927 | 74243033 |
| chr10 | 74358443 | 74528093 |
| chr10 | 74369558 | 74435748 |
| chr10 | 74435574 | 74454331 |
| chr10 | 75169700 | 75170975 |
| chr10 | 75685991 | 75814212 |

|       |           |           |
|-------|-----------|-----------|
| chr10 | 75796206  | 75799657  |
| chr10 | 76396916  | 76403366  |
| chr10 | 77493797  | 77495103  |
| chr10 | 7770208   | 7771665   |
| chr10 | 79160595  | 79161119  |
| chr10 | 79349938  | 79350522  |
| chr10 | 807848    | 817884    |
| chr10 | 87330891  | 87334310  |
| chr10 | 87875404  | 87880438  |
| chr10 | 900269    | 900729    |
| chr10 | 90882877  | 90888357  |
| chr10 | 91807141  | 91807445  |
| chr10 | 91958262  | 91958488  |
| chr10 | 92012328  | 92012686  |
| chr10 | 92196893  | 92227975  |
| chr10 | 92346743  | 92347234  |
| chr10 | 92925680  | 93058335  |
| chr10 | 93414474  | 93414838  |
| chr10 | 94429758  | 94443423  |
| chr10 | 94520458  | 94520754  |
| chr10 | 94559713  | 94560418  |
| chr10 | 94559730  | 94560410  |
| chr10 | 94565244  | 94567393  |
| chr10 | 95173067  | 95228430  |
| chr10 | 95691451  | 95692243  |
| chr10 | 96056895  | 96058294  |
| chr10 | 97283073  | 97283361  |
| chr10 | 97288321  | 97291261  |
| chr10 | 97604966  | 97606236  |
| chr10 | 989997    | 990473    |
| chr10 | 993535    | 1014355   |
| chr10 | 99907300  | 99907490  |
| chr10 | 99919709  | 99920185  |
| chr11 | 102177094 | 102177343 |
| chr11 | 102349877 | 102379913 |
| chr11 | 102349877 | 102390613 |
| chr11 | 102350345 | 102390613 |
| chr11 | 107796051 | 107796788 |
| chr11 | 108246697 | 108246898 |
| chr11 | 108261352 | 108276790 |
| chr11 | 108929488 | 108940335 |
| chr11 | 110125595 | 110127618 |
| chr11 | 110241595 | 110242205 |
| chr11 | 110430681 | 110443085 |
| chr11 | 110441153 | 110442999 |

|       |           |           |
|-------|-----------|-----------|
| chr11 | 113809970 | 113810769 |
| chr11 | 114400016 | 114540760 |
| chr11 | 114495572 | 114540760 |
| chr11 | 114501659 | 114540760 |
| chr11 | 117023972 | 117024639 |
| chr11 | 117240595 | 117243241 |
| chr11 | 117254225 | 117254640 |
| chr11 | 118582360 | 118582804 |
| chr11 | 119004375 | 119005329 |
| chr11 | 119009380 | 119009891 |
| chr11 | 119211307 | 119211542 |
| chr11 | 120575668 | 120577074 |
| chr11 | 122116132 | 122128092 |
| chr11 | 122128024 | 122132832 |
| chr11 | 122661930 | 122664820 |
| chr11 | 122670857 | 122671886 |
| chr11 | 122712171 | 122714877 |
| chr11 | 122712171 | 122716499 |
| chr11 | 123081862 | 123082661 |
| chr11 | 123126819 | 123127231 |
| chr11 | 123132999 | 123134618 |
| chr11 | 123187620 | 123189422 |
| chr11 | 124767343 | 124784719 |
| chr11 | 14296054  | 14356769  |
| chr11 | 14311116  | 14311629  |
| chr11 | 14358758  | 14359050  |
| chr11 | 14461247  | 14468728  |
| chr11 | 17845270  | 18011762  |
| chr11 | 17863565  | 18010139  |
| chr11 | 17873506  | 18010139  |
| chr11 | 17874219  | 17874477  |
| chr11 | 17926737  | 18010139  |
| chr11 | 18336376  | 18337175  |
| chr11 | 19762228  | 19762631  |
| chr11 | 19823618  | 19825016  |
| chr11 | 20390985  | 20391281  |
| chr11 | 2585940   | 2586213   |
| chr11 | 28227994  | 28230985  |
| chr11 | 2986189   | 2986859   |
| chr11 | 2986296   | 2986727   |
| chr11 | 31452717  | 31488241  |
| chr11 | 31452845  | 31454387  |
| chr11 | 3361975   | 3369502   |
| chr11 | 3395712   | 3397406   |
| chr11 | 35139302  | 35176734  |



|       |          |          |
|-------|----------|----------|
| chr11 | 36001085 | 36038184 |
| chr11 | 36022493 | 36038184 |
| chr11 | 36180660 | 36197771 |
| chr11 | 378069   | 378221   |
| chr11 | 45805995 | 45812567 |
| chr11 | 46355549 | 46355841 |
| chr11 | 46359050 | 46359698 |
| chr11 | 46604294 | 46605835 |
| chr11 | 46757459 | 46757669 |
| chr11 | 46811769 | 46812071 |
| chr11 | 47060039 | 47060300 |
| chr11 | 47142612 | 47143561 |
| chr11 | 47158649 | 47160186 |
| chr11 | 47502966 | 47506897 |
| chr11 | 47738487 | 47738790 |
| chr11 | 47800144 | 47800523 |
| chr11 | 48069699 | 48070069 |
| chr11 | 57326074 | 57326858 |
| chr11 | 59620414 | 59639521 |
| chr11 | 61414419 | 61414998 |
| chr11 | 61807352 | 61808104 |
| chr11 | 62561475 | 62562711 |
| chr11 | 62561499 | 62562711 |
| chr11 | 62569396 | 62570171 |
| chr11 | 62578467 | 62582092 |
| chr11 | 62585093 | 62585593 |
| chr11 | 62585890 | 62588938 |
| chr11 | 62604439 | 62607569 |
| chr11 | 62809596 | 62815117 |
| chr11 | 63684395 | 63686185 |
| chr11 | 63686794 | 63692052 |
| chr11 | 63687517 | 63688318 |
| chr11 | 63696326 | 63696590 |
| chr11 | 63813704 | 63817959 |
| chr11 | 63819341 | 63820256 |
| chr11 | 63819441 | 63820161 |
| chr11 | 63850874 | 63851367 |
| chr11 | 64004812 | 64005210 |
| chr11 | 64139068 | 64139693 |
| chr11 | 64228264 | 64228894 |
| chr11 | 64274907 | 64281098 |
| chr11 | 6497449  | 6498939  |
| chr11 | 65631545 | 65632871 |
| chr11 | 65897995 | 65898726 |
| chr11 | 65898455 | 65898727 |

|       |          |          |
|-------|----------|----------|
| chr11 | 66232198 | 66243410 |
| chr11 | 66516415 | 66516915 |
| chr11 | 66516670 | 66517078 |
| chr11 | 66635523 | 66637163 |
| chr11 | 66652276 | 66657259 |
| chr11 | 66756756 | 66762450 |
| chr11 | 66795041 | 66795396 |
| chr11 | 67125061 | 67125553 |
| chr11 | 67125121 | 67125522 |
| chr11 | 67130423 | 67131044 |
| chr11 | 67138066 | 67138505 |
| chr11 | 67142626 | 67143103 |
| chr11 | 67146590 | 67147464 |
| chr11 | 67190317 | 67193084 |
| chr11 | 67225677 | 67235399 |
| chr11 | 67271704 | 67271920 |
| chr11 | 67336577 | 67337142 |
| chr11 | 68515027 | 68522689 |
| chr11 | 68824170 | 68824908 |
| chr11 | 68896584 | 68897983 |
| chr11 | 6955614  | 6997020  |
| chr11 | 72224779 | 72230538 |
| chr11 | 73496858 | 73497219 |
| chr11 | 73536139 | 73537300 |
| chr11 | 73677720 | 73752045 |
| chr11 | 73795058 | 73795209 |
| chr11 | 73862534 | 73867487 |
| chr11 | 73916518 | 73931616 |
| chr11 | 74767960 | 74768323 |
| chr11 | 74843801 | 74851018 |
| chr11 | 74850929 | 74862280 |
| chr11 | 74850929 | 74874895 |
| chr11 | 74850929 | 74911425 |
| chr11 | 74850943 | 74876977 |
| chr11 | 75413519 | 75414320 |
| chr11 | 75961452 | 76141414 |
| chr11 | 76447069 | 76448680 |
| chr11 | 76491466 | 76492184 |
| chr11 | 77626561 | 77626801 |
| chr11 | 77825902 | 77826149 |
| chr11 | 77825922 | 77826168 |
| chr11 | 77991659 | 77992462 |
| chr11 | 78122670 | 78123060 |
| chr11 | 78269052 | 78273808 |
| chr11 | 78511913 | 78512299 |

|       |           |           |
|-------|-----------|-----------|
| chr11 | 840591    | 840986    |
| chr11 | 857693    | 861423    |
| chr11 | 86318935  | 86326676  |
| chr11 | 8929436   | 8929694   |
| chr11 | 90096818  | 90168505  |
| chr11 | 9245550   | 9245715   |
| chr11 | 93365346  | 93386041  |
| chr11 | 93790830  | 93791135  |
| chr11 | 9404394   | 9404621   |
| chr11 | 9408517   | 9411470   |
| chr11 | 9431882   | 9432296   |
| chr11 | 94485215  | 94485688  |
| chr11 | 96040790  | 96041915  |
| chr11 | 96130348  | 96136347  |
| chr11 | 96327703  | 96327882  |
| chr11 | 9779462   | 9808144   |
| chr11 | 9779887   | 9780575   |
| chr12 | 100167069 | 100196979 |
| chr12 | 100591671 | 100592449 |
| chr12 | 1010388   | 1010605   |
| chr12 | 102019284 | 102050291 |
| chr12 | 10216278  | 10216634  |
| chr12 | 102277673 | 102423180 |
| chr12 | 104290487 | 104291000 |
| chr12 | 104557295 | 104558269 |
| chr12 | 104834090 | 104900301 |
| chr12 | 104865442 | 104900301 |
| chr12 | 105361064 | 105362102 |
| chr12 | 106245903 | 106246469 |
| chr12 | 106245906 | 106246466 |
| chr12 | 108532505 | 108532896 |
| chr12 | 108541329 | 108541648 |
| chr12 | 108813137 | 108813490 |
| chr12 | 109090817 | 109091289 |
| chr12 | 109943422 | 109946069 |
| chr12 | 11021544  | 11028515  |
| chr12 | 11028400  | 11121180  |
| chr12 | 110286191 | 110286970 |
| chr12 | 110298625 | 110300449 |
| chr12 | 110396786 | 110398007 |
| chr12 | 11053032  | 11121180  |
| chr12 | 11121009  | 11124187  |
| chr12 | 11121009  | 11124323  |
| chr12 | 11121009  | 11129363  |
| chr12 | 11121009  | 11133367  |

|       |           |           |
|-------|-----------|-----------|
| chr12 | 11121009  | 11142155  |
| chr12 | 111507184 | 111510444 |
| chr12 | 111572323 | 111586331 |
| chr12 | 111649179 | 111649771 |
| chr12 | 111661979 | 111662290 |
| chr12 | 111661983 | 111662844 |
| chr12 | 111750368 | 111751477 |
| chr12 | 112069742 | 112070856 |
| chr12 | 112137248 | 112137758 |
| chr12 | 112320667 | 112320928 |
| chr12 | 112360906 | 112361376 |
| chr12 | 113197540 | 113200813 |
| chr12 | 113264614 | 113264870 |
| chr12 | 115986511 | 115987113 |
| chr12 | 116202955 | 116205153 |
| chr12 | 116230432 | 116237632 |
| chr12 | 116230432 | 116240462 |
| chr12 | 116230532 | 116240462 |
| chr12 | 11710496  | 11711395  |
| chr12 | 117181928 | 117187189 |
| chr12 | 117641747 | 117642386 |
| chr12 | 1181061   | 1181538   |
| chr12 | 120154842 | 120155716 |
| chr12 | 120523932 | 120524370 |
| chr12 | 121291123 | 121291811 |
| chr12 | 121293199 | 121294042 |
| chr12 | 121293258 | 121294014 |
| chr12 | 121502582 | 121503065 |
| chr12 | 121666426 | 121667042 |
| chr12 | 121742845 | 121743275 |
| chr12 | 121900892 | 121905318 |
| chr12 | 121905658 | 121906833 |
| chr12 | 122049797 | 122050025 |
| chr12 | 122338639 | 122340190 |
| chr12 | 122378385 | 122378865 |
| chr12 | 122403786 | 122404352 |
| chr12 | 122575226 | 122576090 |
| chr12 | 122877801 | 122879505 |
| chr12 | 123322528 | 123322692 |
| chr12 | 123623298 | 123623554 |
| chr12 | 123636824 | 123637597 |
| chr12 | 124088263 | 124090937 |
| chr12 | 125009567 | 125010817 |
| chr12 | 125115342 | 125117062 |
| chr12 | 126730762 | 126748077 |

|       |           |           |
|-------|-----------|-----------|
| chr12 | 128794032 | 128814803 |
| chr12 | 12935258  | 12947238  |
| chr12 | 131937794 | 131938326 |
| chr12 | 131939193 | 131941746 |
| chr12 | 131961198 | 132105304 |
| chr12 | 132562050 | 132562924 |
| chr12 | 132570173 | 132571158 |
| chr12 | 132755805 | 132756151 |
| chr12 | 132796603 | 132827713 |
| chr12 | 132822019 | 132822649 |
| chr12 | 1386249   | 1386434   |
| chr12 | 15209268  | 15223969  |
| chr12 | 21233699  | 21234299  |
| chr12 | 26370522  | 26371140  |
| chr12 | 27426131  | 27426317  |
| chr12 | 28198942  | 28328191  |
| chr12 | 28255580  | 28315308  |
| chr12 | 2880260   | 2880674   |
| chr12 | 2917784   | 2918208   |
| chr12 | 29659879  | 29660885  |
| chr12 | 3087421   | 3102532   |
| chr12 | 31455790  | 31457976  |
| chr12 | 31465597  | 31466499  |
| chr12 | 31469250  | 31470224  |
| chr12 | 31469256  | 31470224  |
| chr12 | 31523356  | 31524392  |
| chr12 | 32141739  | 32142134  |
| chr12 | 32729737  | 32730134  |
| chr12 | 32745679  | 32755172  |
| chr12 | 32747075  | 32750839  |
| chr12 | 38817894  | 38819529  |
| chr12 | 39911985  | 40018935  |
| chr12 | 40018845  | 40085700  |
| chr12 | 42352608  | 42352870  |
| chr12 | 46194915  | 46195176  |
| chr12 | 46261295  | 46261851  |
| chr12 | 47103692  | 47108164  |
| chr12 | 48149326  | 48153525  |
| chr12 | 48346221  | 48346734  |
| chr12 | 48784897  | 48786593  |
| chr12 | 48823350  | 48828121  |
| chr12 | 49406472  | 49408042  |
| chr12 | 49468370  | 49469184  |
| chr12 | 49469795  | 49470126  |
| chr12 | 49501883  | 49503071  |

|       |          |          |
|-------|----------|----------|
| chr12 | 50153876 | 50163308 |
| chr12 | 50179828 | 50180440 |
| chr12 | 50183733 | 50190127 |
| chr12 | 50216459 | 50216642 |
| chr12 | 50219407 | 50220170 |
| chr12 | 50450778 | 50451421 |
| chr12 | 50457688 | 50458046 |
| chr12 | 50701619 | 50702005 |
| chr12 | 51376095 | 51376440 |
| chr12 | 51683741 | 51689096 |
| chr12 | 5198501  | 5276889  |
| chr12 | 54109820 | 54110220 |
| chr12 | 54185810 | 54186391 |
| chr12 | 54270411 | 54270961 |
| chr12 | 54275925 | 54277127 |
| chr12 | 55780376 | 55786559 |
| chr12 | 55814841 | 55815536 |
| chr12 | 56139360 | 56141838 |
| chr12 | 56680268 | 56680572 |
| chr12 | 56681065 | 56682627 |
| chr12 | 57706454 | 57706843 |
| chr12 | 57748983 | 57749722 |
| chr12 | 57932009 | 57932421 |
| chr12 | 62879115 | 62880653 |
| chr12 | 63934632 | 63937998 |
| chr12 | 63937844 | 64028707 |
| chr12 | 6515395  | 6515978  |
| chr12 | 6518751  | 6524421  |
| chr12 | 65278734 | 65463323 |
| chr12 | 6600551  | 6605995  |
| chr12 | 66362029 | 66372018 |
| chr12 | 68692486 | 68692844 |
| chr12 | 69262615 | 69263154 |
| chr12 | 69539352 | 69539977 |
| chr12 | 6983001  | 6983206  |
| chr12 | 6983001  | 6988369  |
| chr12 | 6983001  | 6997342  |
| chr12 | 70380196 | 70381594 |
| chr12 | 71657525 | 71660427 |
| chr12 | 71657548 | 71660427 |
| chr12 | 71657974 | 71658347 |
| chr12 | 71659346 | 71660427 |
| chr12 | 71774742 | 71775553 |
| chr12 | 7316960  | 7326019  |
| chr12 | 7396287  | 7436602  |

|       |           |           |
|-------|-----------|-----------|
| chr12 | 76776324  | 76777002  |
| chr12 | 79668274  | 79668843  |
| chr12 | 85833336  | 85840709  |
| chr12 | 8926371   | 8928156   |
| chr12 | 92872315  | 92872709  |
| chr12 | 9606352   | 9622436   |
| chr12 | 96203848  | 96206411  |
| chr12 | 98523893  | 98524353  |
| chr13 | 102873242 | 102875914 |
| chr13 | 107368491 | 107468528 |
| chr13 | 107466014 | 107467250 |
| chr13 | 107523563 | 107693167 |
| chr13 | 107598840 | 107635379 |
| chr13 | 107617216 | 107638963 |
| chr13 | 107617216 | 107693167 |
| chr13 | 107650237 | 107693167 |
| chr13 | 107664846 | 107681862 |
| chr13 | 107664846 | 107693167 |
| chr13 | 107684166 | 107693167 |
| chr13 | 110686524 | 110687442 |
| chr13 | 112793463 | 112794620 |
| chr13 | 113348354 | 113348604 |
| chr13 | 113769720 | 113769935 |
| chr13 | 114235719 | 114272665 |
| chr13 | 114287526 | 114287842 |
| chr13 | 19824919  | 19851957  |
| chr13 | 20891829  | 20892174  |
| chr13 | 20982586  | 20982773  |
| chr13 | 23361047  | 23361515  |
| chr13 | 23361051  | 23361520  |
| chr13 | 23745852  | 23746121  |
| chr13 | 23745852  | 23746124  |
| chr13 | 23826330  | 23869387  |
| chr13 | 23855033  | 23858922  |
| chr13 | 24164371  | 24164513  |
| chr13 | 24292024  | 24292705  |
| chr13 | 24436447  | 24439230  |
| chr13 | 24493688  | 24494717  |
| chr13 | 24951594  | 24967453  |
| chr13 | 26349116  | 26404155  |
| chr13 | 26573714  | 26593722  |
| chr13 | 27236444  | 27236858  |
| chr13 | 28669590  | 28669897  |
| chr13 | 28701789  | 28717655  |
| chr13 | 29445578  | 29487935  |

|       |           |           |
|-------|-----------|-----------|
| chr13 | 29453067  | 29487935  |
| chr13 | 29453067  | 29492665  |
| chr13 | 29453067  | 29492707  |
| chr13 | 29453067  | 29493753  |
| chr13 | 29476766  | 29498462  |
| chr13 | 29485085  | 29489765  |
| chr13 | 29514352  | 29527365  |
| chr13 | 29550203  | 29554673  |
| chr13 | 29550203  | 29560345  |
| chr13 | 29550203  | 29560349  |
| chr13 | 30207641  | 30283687  |
| chr13 | 30650056  | 30650358  |
| chr13 | 31936448  | 31985734  |
| chr13 | 31941307  | 31985734  |
| chr13 | 32355106  | 32398359  |
| chr13 | 32436712  | 32436990  |
| chr13 | 32444544  | 32445017  |
| chr13 | 32477886  | 32480637  |
| chr13 | 32502343  | 32502929  |
| chr13 | 32593020  | 32629771  |
| chr13 | 41230052  | 41230334  |
| chr13 | 44510314  | 44510702  |
| chr13 | 49665564  | 49666450  |
| chr13 | 49723836  | 49724678  |
| chr13 | 49991273  | 50045232  |
| chr13 | 50023901  | 50024385  |
| chr13 | 52457143  | 52457568  |
| chr13 | 60512356  | 60513540  |
| chr13 | 63732971  | 63748397  |
| chr13 | 77317250  | 77317678  |
| chr13 | 87600955  | 87621158  |
| chr13 | 95049613  | 95051776  |
| chr13 | 95163141  | 95166264  |
| chr13 | 98145769  | 98146323  |
| chr14 | 100264095 | 100264858 |
| chr14 | 101917925 | 101925341 |
| chr14 | 102146429 | 102147125 |
| chr14 | 102159235 | 102159536 |
| chr14 | 102235608 | 102236294 |
| chr14 | 102240309 | 102242175 |
| chr14 | 102281246 | 102281689 |
| chr14 | 102340541 | 102340795 |
| chr14 | 102478043 | 102478297 |
| chr14 | 102657125 | 102663938 |
| chr14 | 102788132 | 102788523 |



|       |           |           |
|-------|-----------|-----------|
| chr14 | 102961827 | 102962618 |
| chr14 | 102965232 | 102965696 |
| chr14 | 103390239 | 103390731 |
| chr14 | 103398950 | 103411765 |
| chr14 | 103398950 | 103438333 |
| chr14 | 103464530 | 103484981 |
| chr14 | 103494854 | 103495269 |
| chr14 | 103564146 | 103564571 |
| chr14 | 103701856 | 103704429 |
| chr14 | 103913286 | 103919908 |
| chr14 | 104782781 | 104782997 |
| chr14 | 105320553 | 105320939 |
| chr14 | 20261612  | 20306134  |
| chr14 | 20318454  | 20318844  |
| chr14 | 21246054  | 21246464  |
| chr14 | 21250127  | 21263829  |
| chr14 | 21429170  | 21431003  |
| chr14 | 22833885  | 22834553  |
| chr14 | 22917704  | 22918131  |
| chr14 | 22917712  | 22918132  |
| chr14 | 24209889  | 24211852  |
| chr14 | 26735241  | 26782208  |
| chr14 | 29724469  | 29743343  |
| chr14 | 29871748  | 29915357  |
| chr14 | 31154569  | 31155107  |
| chr14 | 31703116  | 31704138  |
| chr14 | 32149679  | 32154245  |
| chr14 | 34756730  | 34757120  |
| chr14 | 35002261  | 35002527  |
| chr14 | 35009132  | 35010187  |
| chr14 | 35027240  | 35027542  |
| chr14 | 35746406  | 35749164  |
| chr14 | 45005099  | 45005428  |
| chr14 | 45132726  | 45133222  |
| chr14 | 45148875  | 45160830  |
| chr14 | 45182215  | 45182504  |
| chr14 | 49603575  | 49604240  |
| chr14 | 50237676  | 50303034  |
| chr14 | 50516022  | 50519626  |
| chr14 | 50635213  | 50649389  |
| chr14 | 54604371  | 54609625  |
| chr14 | 54668791  | 54669024  |
| chr14 | 55060436  | 55060888  |
| chr14 | 58322129  | 58322701  |
| chr14 | 58322180  | 58322748  |

|       |          |          |
|-------|----------|----------|
| chr14 | 58399240 | 58408414 |
| chr14 | 58423104 | 58423257 |
| chr14 | 61713935 | 61715603 |
| chr14 | 63463024 | 63463249 |
| chr14 | 64441452 | 64442032 |
| chr14 | 64751411 | 64751792 |
| chr14 | 64916822 | 64917171 |
| chr14 | 65537599 | 65538688 |
| chr14 | 67008385 | 67008600 |
| chr14 | 67110464 | 67180986 |
| chr14 | 67164175 | 67164586 |
| chr14 | 67312057 | 67336738 |
| chr14 | 68089208 | 68118479 |
| chr14 | 68115818 | 68116112 |
| chr14 | 68115818 | 68118479 |
| chr14 | 68157668 | 68158239 |
| chr14 | 69769510 | 69770042 |
| chr14 | 70969743 | 70976621 |
| chr14 | 71035816 | 71053412 |
| chr14 | 73089048 | 73089455 |
| chr14 | 73101598 | 73101789 |
| chr14 | 73179582 | 73180018 |
| chr14 | 73182746 | 73183212 |
| chr14 | 73420249 | 73420559 |
| chr14 | 73494152 | 73505073 |
| chr14 | 73866414 | 73866812 |
| chr14 | 73870674 | 73874676 |
| chr14 | 74092583 | 74093689 |
| chr14 | 74119855 | 74120164 |
| chr14 | 74298569 | 74299794 |
| chr14 | 75772937 | 75773613 |
| chr14 | 77673559 | 77675794 |
| chr14 | 77734660 | 77735405 |
| chr14 | 77748885 | 77749519 |
| chr14 | 77801679 | 77802690 |
| chr14 | 80306851 | 80313579 |
| chr14 | 80497468 | 80535062 |
| chr14 | 85596238 | 85597407 |
| chr14 | 86028368 | 86041833 |
| chr14 | 89471273 | 89486671 |
| chr14 | 89977062 | 89977392 |
| chr14 | 90285081 | 90285532 |
| chr14 | 91135557 | 91136029 |
| chr14 | 91169009 | 91169491 |
| chr14 | 92076906 | 92077727 |

|              |           |           |
|--------------|-----------|-----------|
| chr14        | 93288500  | 93288865  |
| chr14        | 94084190  | 94085264  |
| chr14        | 96520126  | 96565214  |
| chr14        | 96931330  | 96945382  |
| chr14        | 96943516  | 96945382  |
| chr14        | 96943516  | 96945386  |
| chr14        | 96943516  | 96980767  |
| chr14        | 96943516  | 96998134  |
| chr14        | 99490105  | 99491973  |
| chr14        | 99533075  | 99534095  |
| 3L000194v1_1 | 92152     | 92446     |
| chr15        | 100889866 | 100890010 |
| chr15        | 25393745  | 25415842  |
| chr15        | 28960370  | 28960854  |
| chr15        | 32633934  | 32636408  |
| chr15        | 34143889  | 34144680  |
| chr15        | 38499490  | 38516226  |
| chr15        | 40641378  | 40650819  |
| chr15        | 40645691  | 40650819  |
| chr15        | 40779083  | 40792856  |
| chr15        | 40804263  | 40805117  |
| chr15        | 40896579  | 40898497  |
| chr15        | 41102592  | 41103499  |
| chr15        | 41109854  | 41113376  |
| chr15        | 41111425  | 41111953  |
| chr15        | 41289571  | 41290214  |
| chr15        | 41378680  | 41379048  |
| chr15        | 41401352  | 41403355  |
| chr15        | 41500207  | 41500747  |
| chr15        | 41764045  | 41764348  |
| chr15        | 42638707  | 42669351  |
| chr15        | 43017732  | 43018112  |
| chr15        | 43435185  | 43436122  |
| chr15        | 43811039  | 43811183  |
| chr15        | 43852324  | 43852624  |
| chr15        | 43876959  | 43890703  |
| chr15        | 44094068  | 44096203  |
| chr15        | 44166844  | 44172981  |
| chr15        | 44169196  | 44172981  |
| chr15        | 44392127  | 44451387  |
| chr15        | 44410792  | 44411135  |
| chr15        | 44449541  | 44449777  |
| chr15        | 44597930  | 44620697  |
| chr15        | 45044780  | 45045449  |
| chr15        | 49225204  | 49308777  |

|       |          |          |
|-------|----------|----------|
| chr15 | 49225204 | 49328130 |
| chr15 | 49235624 | 49328130 |
| chr15 | 49308607 | 49328130 |
| chr15 | 49318971 | 49328130 |
| chr15 | 51065428 | 51066305 |
| chr15 | 51244629 | 51245314 |
| chr15 | 51723364 | 51724946 |
| chr15 | 51895475 | 51895854 |
| chr15 | 51900164 | 51934354 |
| chr15 | 56019395 | 56162240 |
| chr15 | 56156515 | 56162240 |
| chr15 | 56229655 | 56230879 |
| chr15 | 56960660 | 56960903 |
| chr15 | 57072652 | 57095163 |
| chr15 | 58899730 | 58900531 |
| chr15 | 58999566 | 59000465 |
| chr15 | 63213988 | 63214386 |
| chr15 | 63567616 | 63568079 |
| chr15 | 63567627 | 63568061 |
| chr15 | 64086334 | 64086723 |
| chr15 | 64296414 | 64296612 |
| chr15 | 64421189 | 64421431 |
| chr15 | 64689235 | 64689998 |
| chr15 | 64817467 | 64820506 |
| chr15 | 64983180 | 64983893 |
| chr15 | 65002885 | 65005718 |
| chr15 | 65467476 | 65469070 |
| chr15 | 65503895 | 65504440 |
| chr15 | 65534348 | 65538937 |
| chr15 | 67231229 | 67236805 |
| chr15 | 67544612 | 67546400 |
| chr15 | 67600644 | 67661494 |
| chr15 | 67604824 | 67605108 |
| chr15 | 67623874 | 67624045 |
| chr15 | 67645801 | 67647921 |
| chr15 | 68068340 | 68068497 |
| chr15 | 69194435 | 69196745 |
| chr15 | 72241388 | 72271226 |
| chr15 | 74795957 | 74797185 |
| chr15 | 75000317 | 75003635 |
| chr15 | 75477502 | 75477935 |
| chr15 | 75529283 | 75529662 |
| chr15 | 77283882 | 77365225 |
| chr15 | 77346541 | 77388802 |
| chr15 | 77361314 | 77371899 |

|       |          |          |
|-------|----------|----------|
| chr15 | 77361314 | 77388802 |
| chr15 | 77361314 | 77412774 |
| chr15 | 77364073 | 77365225 |
| chr15 | 77365162 | 77388802 |
| chr15 | 78480916 | 78481450 |
| chr15 | 78884286 | 78888008 |
| chr15 | 79046048 | 79047082 |
| chr15 | 79808076 | 79846856 |
| chr15 | 79845157 | 79846856 |
| chr15 | 79845248 | 79846856 |
| chr15 | 82380397 | 82382879 |
| chr15 | 83054303 | 83055345 |
| chr15 | 83110000 | 83115741 |
| chr15 | 84526780 | 84570643 |
| chr15 | 84700936 | 84701407 |
| chr15 | 85039028 | 85043798 |
| chr15 | 89290457 | 89305224 |
| chr15 | 89477531 | 89480580 |
| chr15 | 90598449 | 90600441 |
| chr15 | 90713142 | 90714086 |
| chr15 | 90713142 | 90715042 |
| chr15 | 90759501 | 90759701 |
| chr15 | 90759504 | 90759701 |
| chr15 | 90971444 | 90971910 |
| chr15 | 92910606 | 92911506 |
| chr15 | 96306250 | 96319013 |
| chr15 | 98819861 | 98824242 |
| chr16 | 10444075 | 10447451 |
| chr16 | 11904500 | 11905587 |
| chr16 | 11994028 | 11995160 |
| chr16 | 11995355 | 11995773 |
| chr16 | 12226862 | 12227609 |
| chr16 | 1360561  | 1360984  |
| chr16 | 14579166 | 14579850 |
| chr16 | 14984049 | 14986841 |
| chr16 | 15513283 | 15533135 |
| chr16 | 15556667 | 15557966 |
| chr16 | 1721240  | 1723129  |
| chr16 | 1721578  | 1722610  |
| chr16 | 18874220 | 18874831 |
| chr16 | 19705998 | 19712772 |
| chr16 | 19706591 | 19712772 |
| chr16 | 20896307 | 20897874 |
| chr16 | 21315310 | 21317126 |
| chr16 | 216255   | 217825   |

|       |          |          |
|-------|----------|----------|
| chr16 | 21993299 | 22007696 |
| chr16 | 22146396 | 22147642 |
| chr16 | 223343   | 223705   |
| chr16 | 22402691 | 22437737 |
| chr16 | 236530   | 238113   |
| chr16 | 2445940  | 2447369  |
| chr16 | 25054818 | 25134290 |
| chr16 | 27525112 | 27527263 |
| chr16 | 27671625 | 27672456 |
| chr16 | 2768504  | 2768941  |
| chr16 | 2790876  | 2799535  |
| chr16 | 2892099  | 2893732  |
| chr16 | 28979664 | 28980058 |
| chr16 | 29793402 | 29794613 |
| chr16 | 29806676 | 29807422 |
| chr16 | 29816669 | 29819936 |
| chr16 | 29895101 | 29896389 |
| chr16 | 29969479 | 29969965 |
| chr16 | 30079458 | 30080069 |
| chr16 | 30112975 | 30113219 |
| chr16 | 30362278 | 30362777 |
| chr16 | 30712315 | 30713534 |
| chr16 | 30930321 | 30942405 |
| chr16 | 30977214 | 30978000 |
| chr16 | 31122021 | 31122604 |
| chr16 | 31700661 | 31706999 |
| chr16 | 31700685 | 31706999 |
| chr16 | 328287   | 330203   |
| chr16 | 3545883  | 3565121  |
| chr16 | 3654960  | 3658064  |
| chr16 | 3710384  | 3715088  |
| chr16 | 3778948  | 3779422  |
| chr16 | 402882   | 403093   |
| chr16 | 4036780  | 4037044  |
| chr16 | 4103006  | 4103598  |
| chr16 | 4107473  | 4108483  |
| chr16 | 4259010  | 4259243  |
| chr16 | 46923743 | 46924206 |
| chr16 | 50103051 | 50103742 |
| chr16 | 53109954 | 53110316 |
| chr16 | 53759597 | 53760342 |
| chr16 | 54108774 | 54111889 |
| chr16 | 56840302 | 56840713 |
| chr16 | 56840304 | 56840711 |
| chr16 | 57182845 | 57183427 |

|       |          |          |
|-------|----------|----------|
| chr16 | 57435786 | 57436253 |
| chr16 | 57793732 | 57794352 |
| chr16 | 58708182 | 58716111 |
| chr16 | 58717142 | 58717949 |
| chr16 | 66580066 | 66598840 |
| chr16 | 67072701 | 67073518 |
| chr16 | 67122939 | 67123363 |
| chr16 | 67320774 | 67325140 |
| chr16 | 67410974 | 67411845 |
| chr16 | 67744144 | 67759732 |
| chr16 | 67792484 | 67793421 |
| chr16 | 67901413 | 67902182 |
| chr16 | 67912775 | 67914549 |
| chr16 | 68036650 | 68037370 |
| chr16 | 68042943 | 68043181 |
| chr16 | 68271883 | 68272351 |
| chr16 | 68281872 | 68284194 |
| chr16 | 69314617 | 69314906 |
| chr16 | 69314617 | 69315064 |
| chr16 | 69336379 | 69336843 |
| chr16 | 69628981 | 69630031 |
| chr16 | 69651902 | 69652215 |
| chr16 | 69656188 | 69656546 |
| chr16 | 69669981 | 69693003 |
| chr16 | 70280364 | 70282049 |
| chr16 | 70287445 | 70288592 |
| chr16 | 70326384 | 70326631 |
| chr16 | 70366070 | 70368168 |
| chr16 | 70464598 | 70469609 |
| chr16 | 70530033 | 70530414 |
| chr16 | 70539455 | 70539871 |
| chr16 | 71637876 | 71641040 |
| chr16 | 71702600 | 71714587 |
| chr16 | 71744210 | 71744657 |
| chr16 | 71744225 | 71744657 |
| chr16 | 71792066 | 71792592 |
| chr16 | 71898606 | 71902325 |
| chr16 | 72089535 | 72090121 |
| chr16 | 72236768 | 72391215 |
| chr16 | 72284576 | 72308188 |
| chr16 | 72284576 | 72391215 |
| chr16 | 72308055 | 72391215 |
| chr16 | 72349045 | 72391215 |
| chr16 | 72377728 | 72391215 |
| chr16 | 72617182 | 72617553 |

|       |          |          |
|-------|----------|----------|
| chr16 | 74365060 | 74366037 |
| chr16 | 74573957 | 74575133 |
| chr16 | 74599388 | 74599908 |
| chr16 | 75154131 | 75154892 |
| chr16 | 75232426 | 75233128 |
| chr16 | 85264948 | 85357643 |
| chr16 | 87394812 | 87394993 |
| chr16 | 8745591  | 8746488  |
| chr16 | 89361494 | 89422305 |
| chr16 | 89392379 | 89392679 |
| chr16 | 89393613 | 89394390 |
| chr16 | 89513272 | 89514746 |
| chr16 | 89515789 | 89516473 |
| chr16 | 89578667 | 89592103 |
| chr16 | 89587716 | 89588100 |
| chr16 | 89654606 | 89655856 |
| chr16 | 89786610 | 89790141 |
| chr16 | 89801810 | 89802213 |
| chr17 | 1372136  | 1373418  |
| chr17 | 1393708  | 1395296  |
| chr17 | 14071807 | 14072315 |
| chr17 | 1429884  | 1430126  |
| chr17 | 1439378  | 1440072  |
| chr17 | 1527051  | 1528877  |
| chr17 | 15503097 | 15506986 |
| chr17 | 15962177 | 15962638 |
| chr17 | 15988981 | 15990433 |
| chr17 | 15999387 | 16028337 |
| chr17 | 16172278 | 16173040 |
| chr17 | 16452711 | 16454114 |
| chr17 | 17329255 | 17330024 |
| chr17 | 17685411 | 17685657 |
| chr17 | 17929994 | 17931541 |
| chr17 | 17987089 | 18016260 |
| chr17 | 18016060 | 18039050 |
| chr17 | 1816712  | 1817119  |
| chr17 | 18275674 | 18276914 |
| chr17 | 18278900 | 18279366 |
| chr17 | 18284312 | 18285024 |
| chr17 | 19003307 | 19003567 |
| chr17 | 19295467 | 19296201 |
| chr17 | 19349670 | 19350285 |
| chr17 | 19922822 | 19923187 |
| chr17 | 20161118 | 20161889 |
| chr17 | 2034288  | 2034427  |



|       |          |          |
|-------|----------|----------|
| chr17 | 21290997 | 21292613 |
| chr17 | 2314675  | 2322871  |
| chr17 | 2410554  | 2431055  |
| chr17 | 2413763  | 2415954  |
| chr17 | 2603507  | 2603835  |
| chr17 | 2603518  | 2603835  |
| chr17 | 28168470 | 28194708 |
| chr17 | 28590791 | 28591383 |
| chr17 | 28604275 | 28605215 |
| chr17 | 28672658 | 28676968 |
| chr17 | 28720772 | 28722882 |
| chr17 | 29280088 | 29281063 |
| chr17 | 29579514 | 29581041 |
| chr17 | 2961450  | 2961938  |
| chr17 | 29784320 | 29784532 |
| chr17 | 2987445  | 2988132  |
| chr17 | 2992430  | 2992935  |
| chr17 | 30201154 | 30226115 |
| chr17 | 30445871 | 30449680 |
| chr17 | 30709658 | 30786537 |
| chr17 | 30743300 | 30745851 |
| chr17 | 30743300 | 30745946 |
| chr17 | 30743300 | 30776420 |
| chr17 | 30745713 | 30784892 |
| chr17 | 30753760 | 30754213 |
| chr17 | 30780591 | 30784892 |
| chr17 | 31868882 | 31869627 |
| chr17 | 32351528 | 32377980 |
| chr17 | 34037509 | 34038505 |
| chr17 | 3467473  | 3557800  |
| chr17 | 35110070 | 35111495 |
| chr17 | 35670026 | 35723814 |
| chr17 | 35696659 | 35697687 |
| chr17 | 36512962 | 36513164 |
| chr17 | 36587773 | 36588352 |
| chr17 | 37048653 | 37049308 |
| chr17 | 3720876  | 3722221  |
| chr17 | 3726583  | 3726839  |
| chr17 | 37295916 | 37296371 |
| chr17 | 37346624 | 37347418 |
| chr17 | 37412705 | 37413009 |
| chr17 | 37522942 | 37525572 |
| chr17 | 38397500 | 38397936 |
| chr17 | 38505285 | 38505652 |
| chr17 | 38735491 | 38748308 |

|       |          |          |
|-------|----------|----------|
| chr17 | 38753197 | 38755929 |
| chr17 | 39317998 | 39318473 |
| chr17 | 39466521 | 39467073 |
| chr17 | 39495702 | 39496006 |
| chr17 | 40289548 | 40291323 |
| chr17 | 40394625 | 40395031 |
| chr17 | 41819942 | 41820584 |
| chr17 | 41902489 | 41903901 |
| chr17 | 41951952 | 41954235 |
| chr17 | 42149973 | 42150479 |
| chr17 | 42241262 | 42241552 |
| chr17 | 42332799 | 42334362 |
| chr17 | 42380685 | 42381464 |
| chr17 | 42575053 | 42575744 |
| chr17 | 42594773 | 42595075 |
| chr17 | 42725133 | 42726599 |
| chr17 | 43155800 | 43156009 |
| chr17 | 43204215 | 43204530 |
| chr17 | 43377912 | 43380107 |
| chr17 | 43528234 | 43532914 |
| chr17 | 44038577 | 44039161 |
| chr17 | 44158613 | 44161068 |
| chr17 | 44187616 | 44191284 |
| chr17 | 44209651 | 44209954 |
| chr17 | 44798390 | 44807502 |
| chr17 | 45275390 | 45275871 |
| chr17 | 46083699 | 46084545 |
| chr17 | 46112476 | 46112956 |
| chr17 | 47543044 | 47543989 |
| chr17 | 48082834 | 48083564 |
| chr17 | 4888123  | 4888792  |
| chr17 | 4945920  | 4948373  |
| chr17 | 50434593 | 50434965 |
| chr17 | 50695853 | 50700651 |
| chr17 | 50723856 | 50724305 |
| chr17 | 50742047 | 50743243 |
| chr17 | 51054729 | 51055076 |
| chr17 | 5287521  | 5288477  |
| chr17 | 5388861  | 5397536  |
| chr17 | 5462232  | 5462826  |
| chr17 | 57377197 | 57377789 |
| chr17 | 57847254 | 57848462 |
| chr17 | 57913107 | 57913404 |
| chr17 | 59063449 | 59063915 |
| chr17 | 59164786 | 59165115 |

|       |          |          |
|-------|----------|----------|
| chr17 | 59717258 | 59717638 |
| chr17 | 59878226 | 59888329 |
| chr17 | 59883665 | 59884399 |
| chr17 | 59943777 | 59944893 |
| chr17 | 60192213 | 60192544 |
| chr17 | 60343956 | 60344238 |
| chr17 | 60347657 | 60347842 |
| chr17 | 60377093 | 60380399 |
| chr17 | 61354361 | 61392121 |
| chr17 | 61712449 | 61712722 |
| chr17 | 61844159 | 61844391 |
| chr17 | 62429535 | 62433816 |
| chr17 | 62484575 | 62484767 |
| chr17 | 63111244 | 63126463 |
| chr17 | 63116268 | 63116575 |
| chr17 | 63660873 | 63663216 |
| chr17 | 64560045 | 64560700 |
| chr17 | 64561802 | 64562018 |
| chr17 | 64644163 | 64644470 |
| chr17 | 6532028  | 6533072  |
| chr17 | 6580108  | 6580424  |
| chr17 | 66363157 | 66364589 |
| chr17 | 66367966 | 66369943 |
| chr17 | 67884336 | 67885281 |
| chr17 | 68039239 | 68039966 |
| chr17 | 68432215 | 68432835 |
| chr17 | 7245214  | 7245608  |
| chr17 | 72721374 | 72721742 |
| chr17 | 72924414 | 72925830 |
| chr17 | 735300   | 735675   |
| chr17 | 7408011  | 7415671  |
| chr17 | 7475257  | 7475561  |
| chr17 | 74989909 | 74991127 |
| chr17 | 75054223 | 75057981 |
| chr17 | 75120172 | 75120539 |
| chr17 | 75175864 | 75176411 |
| chr17 | 75178122 | 75178641 |
| chr17 | 75383011 | 75383588 |
| chr17 | 7596460  | 7599590  |
| chr17 | 76393027 | 76393495 |
| chr17 | 76443581 | 76443967 |
| chr17 | 76557969 | 76558600 |
| chr17 | 76558373 | 76558600 |
| chr17 | 76584217 | 76594118 |
| chr17 | 76584504 | 76614005 |

|       |          |          |
|-------|----------|----------|
| chr17 | 7690197  | 7690949  |
| chr17 | 78004169 | 78009697 |
| chr17 | 78004169 | 78031781 |
| chr17 | 78182946 | 78183668 |
| chr17 | 78192596 | 78193089 |
| chr17 | 78834208 | 78834534 |
| chr17 | 79078328 | 79079154 |
| chr17 | 80266712 | 80266985 |
| chr17 | 80390607 | 80390831 |
| chr17 | 81086474 | 81086817 |
| chr17 | 81510953 | 81512022 |
| chr17 | 81560027 | 81560455 |
| chr17 | 81705150 | 81709685 |
| chr17 | 81849295 | 81850718 |
| chr17 | 81914932 | 81915406 |
| chr17 | 81998057 | 81998944 |
| chr17 | 8208347  | 8209130  |
| chr17 | 8208513  | 8209257  |
| chr17 | 82207730 | 82208048 |
| chr17 | 82207846 | 82208048 |
| chr17 | 82248967 | 82252527 |
| chr17 | 82265478 | 82266795 |
| chr17 | 82405050 | 82405587 |
| chr17 | 82583454 | 82584637 |
| chr17 | 82791363 | 82792044 |
| chr17 | 83029492 | 83030902 |
| chr17 | 8438240  | 8440237  |
| chr17 | 9486402  | 9486687  |
| chr18 | 12323715 | 12324544 |
| chr18 | 12324277 | 12324544 |
| chr18 | 12375056 | 12375577 |
| chr18 | 1269669  | 1278633  |
| chr18 | 1269669  | 1361221  |
| chr18 | 13666478 | 13672222 |
| chr18 | 20990616 | 20990870 |
| chr18 | 21017483 | 21017712 |
| chr18 | 21049775 | 21111762 |
| chr18 | 21621075 | 21621672 |
| chr18 | 21661607 | 21662027 |
| chr18 | 23017284 | 23017802 |
| chr18 | 24070750 | 24071023 |
| chr18 | 26018018 | 26080423 |
| chr18 | 26078887 | 26079612 |
| chr18 | 26170674 | 26171200 |
| chr18 | 3003370  | 3004964  |

|       |          |          |
|-------|----------|----------|
| chr18 | 36756158 | 36781922 |
| chr18 | 36946248 | 36965076 |
| chr18 | 36959315 | 37084232 |
| chr18 | 45937660 | 45938247 |
| chr18 | 46216179 | 46263101 |
| chr18 | 47091173 | 47097404 |
| chr18 | 49232862 | 49233148 |
| chr18 | 5240186  | 5241889  |
| chr18 | 54360756 | 54378326 |
| chr18 | 56042285 | 56115547 |
| chr18 | 56096074 | 56097195 |
| chr18 | 57695944 | 57780956 |
| chr18 | 57731413 | 57732023 |
| chr18 | 57731413 | 57735592 |
| chr18 | 57734025 | 57735592 |
| chr18 | 57763778 | 57780956 |
| chr18 | 59346302 | 59347286 |
| chr18 | 62891779 | 62892183 |
| chr18 | 63280886 | 63281214 |
| chr18 | 68701615 | 68708817 |
| chr18 | 68891552 | 68897682 |
| chr18 | 692769   | 693175   |
| chr18 | 69935731 | 69947532 |
| chr18 | 708831   | 709155   |
| chr18 | 74980327 | 74982049 |
| chr18 | 7755322  | 7755920  |
| chr18 | 79321102 | 79322555 |
| chr18 | 79503572 | 79504059 |
| chr18 | 8618628  | 8620020  |
| chr18 | 8731496  | 8731754  |
| chr18 | 9367487  | 9388140  |
| chr18 | 9388039  | 9388420  |
| chr18 | 9924995  | 9927254  |
| chr19 | 1005754  | 1006098  |
| chr19 | 10146059 | 10147417 |
| chr19 | 10164159 | 10164348 |
| chr19 | 10283614 | 10284971 |
| chr19 | 1033051  | 1035626  |
| chr19 | 10371558 | 10372100 |
| chr19 | 10373617 | 10374015 |
| chr19 | 10490545 | 10491025 |
| chr19 | 10657741 | 10657950 |
| chr19 | 10731589 | 10734123 |
| chr19 | 10884248 | 10893132 |
| chr19 | 11109448 | 11110210 |

|       |          |          |
|-------|----------|----------|
| chr19 | 11114013 | 11114607 |
| chr19 | 11673588 | 11680972 |
| chr19 | 12106469 | 12111372 |
| chr19 | 12106469 | 12135927 |
| chr19 | 12112164 | 12157058 |
| chr19 | 12135774 | 12147834 |
| chr19 | 12183879 | 12184284 |
| chr19 | 12276147 | 12291250 |
| chr19 | 1241660  | 1242686  |
| chr19 | 12707295 | 12709114 |
| chr19 | 12732046 | 12732699 |
| chr19 | 12811078 | 12812252 |
| chr19 | 12927944 | 12931373 |
| chr19 | 12950294 | 12952618 |
| chr19 | 13124167 | 13124433 |
| chr19 | 13761348 | 13761756 |
| chr19 | 13814514 | 13814865 |
| chr19 | 13992375 | 13992750 |
| chr19 | 13994637 | 13996833 |
| chr19 | 1410441  | 1410608  |
| chr19 | 14127943 | 14129416 |
| chr19 | 14134106 | 14134962 |
| chr19 | 14415590 | 14415811 |
| chr19 | 14481195 | 14481527 |
| chr19 | 16079143 | 16101409 |
| chr19 | 16079987 | 16080498 |
| chr19 | 16080914 | 16101409 |
| chr19 | 16081019 | 16101409 |
| chr19 | 16214622 | 16215156 |
| chr19 | 16432694 | 16438639 |
| chr19 | 16647119 | 16655368 |
| chr19 | 16858125 | 16858697 |
| chr19 | 17080640 | 17081122 |
| chr19 | 17216885 | 17217230 |
| chr19 | 17277479 | 17277900 |
| chr19 | 17492867 | 17494383 |
| chr19 | 1771325  | 1771616  |
| chr19 | 17934761 | 17935924 |
| chr19 | 17986707 | 17987788 |
| chr19 | 18316636 | 18319024 |
| chr19 | 18838616 | 18839120 |
| chr19 | 18991173 | 18993648 |
| chr19 | 19133738 | 19134358 |
| chr19 | 19183332 | 19183992 |
| chr19 | 19191121 | 19191833 |

|       |          |          |
|-------|----------|----------|
| chr19 | 19341619 | 19342442 |
| chr19 | 19482367 | 19483651 |
| chr19 | 19482813 | 19483551 |
| chr19 | 1950432  | 1951097  |
| chr19 | 21024687 | 21025681 |
| chr19 | 2182134  | 2183265  |
| chr19 | 2672920  | 2673382  |
| chr19 | 2771957  | 2772180  |
| chr19 | 2937407  | 2937866  |
| chr19 | 29818998 | 29820323 |
| chr19 | 3003977  | 3004406  |
| chr19 | 3190779  | 3190992  |
| chr19 | 3206608  | 3207034  |
| chr19 | 32371381 | 32371734 |
| chr19 | 32654204 | 32655606 |
| chr19 | 32655116 | 32655634 |
| chr19 | 32709160 | 32711905 |
| chr19 | 32983398 | 32983721 |
| chr19 | 32985912 | 32986558 |
| chr19 | 33004880 | 33006128 |
| chr19 | 33013491 | 33015164 |
| chr19 | 33061715 | 33062256 |
| chr19 | 33174138 | 33174979 |
| chr19 | 33194286 | 33205759 |
| chr19 | 33374451 | 33379073 |
| chr19 | 33378781 | 33379073 |
| chr19 | 33464129 | 33464807 |
| chr19 | 3425690  | 3428275  |
| chr19 | 34298859 | 34308444 |
| chr19 | 34371762 | 34372868 |
| chr19 | 35002666 | 35003946 |
| chr19 | 3540801  | 3541923  |
| chr19 | 3541091  | 3541432  |
| chr19 | 3541135  | 3541890  |
| chr19 | 3574929  | 3575737  |
| chr19 | 35762967 | 35763252 |
| chr19 | 35763790 | 35764373 |
| chr19 | 36078358 | 36078607 |
| chr19 | 36216580 | 36217144 |
| chr19 | 36232816 | 36233179 |
| chr19 | 36657403 | 36662366 |
| chr19 | 3758524  | 3758977  |
| chr19 | 3758527  | 3758989  |
| chr19 | 37992405 | 37994150 |
| chr19 | 38084888 | 38085220 |

|       |          |          |
|-------|----------|----------|
| chr19 | 38136511 | 38137283 |
| chr19 | 38155988 | 38160496 |
| chr19 | 38312790 | 38313114 |
| chr19 | 38377782 | 38378366 |
| chr19 | 38691810 | 38694354 |
| chr19 | 38818790 | 38819685 |
| chr19 | 38942510 | 38951516 |
| chr19 | 39378692 | 39379785 |
| chr19 | 3964861  | 3969714  |
| chr19 | 3980919  | 3982379  |
| chr19 | 3983343  | 3983843  |
| chr19 | 40363701 | 40364080 |
| chr19 | 40758994 | 40759264 |
| chr19 | 40847821 | 40851592 |
| chr19 | 4091952  | 4092811  |
| chr19 | 41245144 | 41245508 |
| chr19 | 41245191 | 41245447 |
| chr19 | 41253637 | 41256575 |
| chr19 | 41390227 | 41391104 |
| chr19 | 41390232 | 41391104 |
| chr19 | 41390232 | 41391117 |
| chr19 | 41866111 | 41867454 |
| chr19 | 42397136 | 42522098 |
| chr19 | 42994749 | 43029275 |
| chr19 | 43137516 | 43182918 |
| chr19 | 43181361 | 43259688 |
| chr19 | 43492381 | 43493018 |
| chr19 | 43516577 | 43520121 |
| chr19 | 43925141 | 43926500 |
| chr19 | 44166408 | 44167413 |
| chr19 | 44227530 | 44227946 |
| chr19 | 44876450 | 44876948 |
| chr19 | 44895824 | 44896773 |
| chr19 | 45021082 | 45021669 |
| chr19 | 45035476 | 45036709 |
| chr19 | 45035733 | 45036167 |
| chr19 | 45050606 | 45050794 |
| chr19 | 45065514 | 45066153 |
| chr19 | 45278835 | 45279280 |
| chr19 | 45369542 | 45369834 |
| chr19 | 4544864  | 4545570  |
| chr19 | 45639978 | 45640475 |
| chr19 | 45727520 | 45728024 |
| chr19 | 45859516 | 45860121 |
| chr19 | 45995468 | 46003114 |



|       |          |          |
|-------|----------|----------|
| chr19 | 4642088  | 4647403  |
| chr19 | 46603321 | 46603532 |
| chr19 | 46607865 | 46608140 |
| chr19 | 46776052 | 46776288 |
| chr19 | 46971296 | 46971613 |
| chr19 | 46971313 | 46971594 |
| chr19 | 47033191 | 47033703 |
| chr19 | 47136725 | 47137118 |
| chr19 | 47156386 | 47156613 |
| chr19 | 47173285 | 47178914 |
| chr19 | 47187801 | 47189260 |
| chr19 | 47356206 | 47357442 |
| chr19 | 47358893 | 47359505 |
| chr19 | 48173557 | 48176803 |
| chr19 | 4854068  | 4854883  |
| chr19 | 48693234 | 48707411 |
| chr19 | 48802714 | 48803275 |
| chr19 | 48959867 | 48960303 |
| chr19 | 4942659  | 4943024  |
| chr19 | 49487768 | 49488057 |
| chr19 | 49488836 | 49489355 |
| chr19 | 4949820  | 4950260  |
| chr19 | 4953953  | 4956029  |
| chr19 | 49748141 | 49757236 |
| chr19 | 49774826 | 49775409 |
| chr19 | 49866527 | 49867021 |
| chr19 | 50394562 | 50394930 |
| chr19 | 50797584 | 50801585 |
| chr19 | 50800677 | 50801585 |
| chr19 | 50800677 | 50801750 |
| chr19 | 51102657 | 51102999 |
| chr19 | 51573209 | 51588078 |
| chr19 | 51689771 | 51690145 |
| chr19 | 52216981 | 52217410 |
| chr19 | 52550731 | 52551138 |
| chr19 | 52588531 | 52599170 |
| chr19 | 52771708 | 52772409 |
| chr19 | 53112237 | 53112826 |
| chr19 | 53344311 | 53344874 |
| chr19 | 53521855 | 53576819 |
| chr19 | 53521889 | 53576853 |
| chr19 | 5710355  | 5710782  |
| chr19 | 57778749 | 57790398 |
| chr19 | 57790273 | 57810077 |
| chr19 | 57843848 | 57844240 |

|       |           |           |
|-------|-----------|-----------|
| chr19 | 57870721  | 57900514  |
| chr19 | 57922464  | 57930557  |
| chr19 | 6388257   | 6388496   |
| chr19 | 653711    | 654297    |
| chr19 | 660071    | 662058    |
| chr19 | 7164019   | 7173428   |
| chr19 | 7406373   | 7406775   |
| chr19 | 7908369   | 7909048   |
| chr19 | 8221819   | 8235597   |
| chr19 | 8241428   | 8243083   |
| chr19 | 8313529   | 8314646   |
| chr19 | 8402092   | 8402631   |
| chr19 | 8479290   | 8480451   |
| chr19 | 8539731   | 8540060   |
| chr19 | 8539731   | 8546207   |
| chr19 | 9366279   | 9367053   |
| chr19 | 9662528   | 9664150   |
| chr1  | 10000163  | 10000771  |
| chr1  | 100050992 | 100052526 |
| chr1  | 100054184 | 100079741 |
| chr1  | 10008706  | 10009118  |
| chr1  | 100196040 | 100206255 |
| chr1  | 10417997  | 10418484  |
| chr1  | 10617458  | 10617615  |
| chr1  | 108188838 | 108195480 |
| chr1  | 108877530 | 108929975 |
| chr1  | 109657781 | 109661592 |
| chr1  | 11028129  | 11028808  |
| chr1  | 110381576 | 110382205 |
| chr1  | 110404970 | 110405270 |
| chr1  | 112612232 | 112612886 |
| chr1  | 112935337 | 112946663 |
| chr1  | 112996840 | 113023554 |
| chr1  | 113017947 | 113023554 |
| chr1  | 113024967 | 113025415 |
| chr1  | 113074816 | 113078735 |
| chr1  | 113481747 | 113482278 |
| chr1  | 113550023 | 113564944 |
| chr1  | 113749505 | 113758733 |
| chr1  | 114742548 | 114743273 |
| chr1  | 115983539 | 116078992 |
| chr1  | 117478090 | 117483400 |
| chr1  | 119015835 | 119124683 |
| chr1  | 119151163 | 119161791 |
| chr1  | 1373761   | 1374361   |

|      |           |           |
|------|-----------|-----------|
| chr1 | 1403036   | 1403338   |
| chr1 | 145787494 | 145788191 |
| chr1 | 145837081 | 145837283 |
| chr1 | 1478520   | 1517187   |
| chr1 | 149638670 | 149638970 |
| chr1 | 150079033 | 150079482 |
| chr1 | 150299138 | 150299536 |
| chr1 | 150301405 | 150301700 |
| chr1 | 150485044 | 150546857 |
| chr1 | 150848809 | 150848972 |
| chr1 | 150948929 | 150953311 |
| chr1 | 151004171 | 151005233 |
| chr1 | 151202699 | 151203275 |
| chr1 | 151202704 | 151203301 |
| chr1 | 151202999 | 151203275 |
| chr1 | 151211259 | 151212669 |
| chr1 | 151237065 | 151237402 |
| chr1 | 151896257 | 151899261 |
| chr1 | 152205859 | 152251758 |
| chr1 | 152223626 | 152249012 |
| chr1 | 153618555 | 153620055 |
| chr1 | 153620209 | 153621266 |
| chr1 | 153893305 | 153897343 |
| chr1 | 153898855 | 153900412 |
| chr1 | 153916271 | 153916836 |
| chr1 | 153975758 | 153975979 |
| chr1 | 154025524 | 154025862 |
| chr1 | 154175307 | 154175914 |
| chr1 | 154231585 | 154232047 |
| chr1 | 154964697 | 154966898 |
| chr1 | 15497091  | 15498323  |
| chr1 | 154986885 | 154987659 |
| chr1 | 155132434 | 155132596 |
| chr1 | 155249368 | 155249516 |
| chr1 | 155314724 | 155315284 |
| chr1 | 155358610 | 155359386 |
| chr1 | 155374323 | 155374847 |
| chr1 | 155519903 | 155520644 |
| chr1 | 155665054 | 155665681 |
| chr1 | 155675616 | 155675970 |
| chr1 | 155681368 | 155683388 |
| chr1 | 155719506 | 155720758 |
| chr1 | 155725771 | 155726184 |
| chr1 | 155732479 | 155732757 |
| chr1 | 155732500 | 155732748 |

|      |           |           |
|------|-----------|-----------|
| chr1 | 155733695 | 155735766 |
| chr1 | 155901103 | 155901897 |
| chr1 | 155906094 | 155906516 |
| chr1 | 155925695 | 155929361 |
| chr1 | 156014818 | 156018476 |
| chr1 | 156132377 | 156132934 |
| chr1 | 156136092 | 156136237 |
| chr1 | 1561614   | 1561749   |
| chr1 | 156207456 | 156208192 |
| chr1 | 156215089 | 156217512 |
| chr1 | 156263459 | 156265868 |
| chr1 | 156266011 | 156267657 |
| chr1 | 156730699 | 156731159 |
| chr1 | 156785464 | 156785857 |
| chr1 | 156790603 | 156791069 |
| chr1 | 15780455  | 15781114  |
| chr1 | 158072178 | 158072661 |
| chr1 | 15887935  | 15888418  |
| chr1 | 161175877 | 161176475 |
| chr1 | 161211085 | 161211435 |
| chr1 | 16130765  | 16131348  |
| chr1 | 16261000  | 16316657  |
| chr1 | 16268745  | 16269333  |
| chr1 | 16331971  | 16332650  |
| chr1 | 16335789  | 16336047  |
| chr1 | 165635319 | 165637009 |
| chr1 | 165847956 | 165848377 |
| chr1 | 165884631 | 165885379 |
| chr1 | 165885141 | 165907892 |
| chr1 | 166103723 | 166147959 |
| chr1 | 166130243 | 166141022 |
| chr1 | 166130243 | 166147959 |
| chr1 | 1678546   | 1678902   |
| chr1 | 168055998 | 168056194 |
| chr1 | 169377137 | 169378480 |
| chr1 | 17002691  | 17004201  |
| chr1 | 171540680 | 171575047 |
| chr1 | 171849176 | 171850840 |
| chr1 | 173440462 | 173442048 |
| chr1 | 174711208 | 174711387 |
| chr1 | 174774363 | 174775408 |
| chr1 | 1752548   | 1754341   |
| chr1 | 175869847 | 175922177 |
| chr1 | 176111068 | 176111403 |
| chr1 | 178737107 | 178741609 |

|      |           |           |
|------|-----------|-----------|
| chr1 | 179030336 | 179049391 |
| chr1 | 179030336 | 179050440 |
| chr1 | 179111563 | 179111816 |
| chr1 | 179113081 | 179113668 |
| chr1 | 179555340 | 179573505 |
| chr1 | 179893172 | 179893496 |
| chr1 | 180640702 | 180641517 |
| chr1 | 1819474   | 1820143   |
| chr1 | 183900530 | 183901196 |
| chr1 | 184477464 | 184509452 |
| chr1 | 186435224 | 186470395 |
| chr1 | 1868741   | 1869944   |
| chr1 | 1868780   | 1869894   |
| chr1 | 187254375 | 187255868 |
| chr1 | 187254375 | 187269508 |
| chr1 | 187326920 | 187443726 |
| chr1 | 1877069   | 1877600   |
| chr1 | 18942362  | 18943433  |
| chr1 | 19158747  | 19158910  |
| chr1 | 192925611 | 192957422 |
| chr1 | 193049016 | 193049467 |
| chr1 | 193299207 | 193315390 |
| chr1 | 19473786  | 19474115  |
| chr1 | 197138758 | 197139101 |
| chr1 | 19898183  | 19898457  |
| chr1 | 200370913 | 200374246 |
| chr1 | 200560538 | 200560987 |
| chr1 | 201995669 | 201995945 |
| chr1 | 202598469 | 202604699 |
| chr1 | 202825175 | 202835197 |
| chr1 | 202886489 | 202886860 |
| chr1 | 206410008 | 206410955 |
| chr1 | 206591721 | 206612357 |
| chr1 | 20744800  | 20776732  |
| chr1 | 20774585  | 20776005  |
| chr1 | 20775723  | 20776005  |
| chr1 | 20965671  | 21059794  |
| chr1 | 21081874  | 21082380  |
| chr1 | 21105352  | 21107285  |
| chr1 | 21241728  | 21250736  |
| chr1 | 214284648 | 214286916 |
| chr1 | 21919441  | 21919931  |
| chr1 | 21924381  | 21924983  |
| chr1 | 219970120 | 219970531 |
| chr1 | 220761655 | 220784071 |

|      |           |           |
|------|-----------|-----------|
| chr1 | 222688829 | 222689244 |
| chr1 | 222823883 | 222835215 |
| chr1 | 222827427 | 222835215 |
| chr1 | 222830928 | 222837325 |
| chr1 | 224229076 | 224229696 |
| chr1 | 224424597 | 224433837 |
| chr1 | 225851667 | 225852237 |
| chr1 | 226253245 | 226253981 |
| chr1 | 229295019 | 229304000 |
| chr1 | 229550828 | 229553192 |
| chr1 | 230266101 | 230269280 |
| chr1 | 230269467 | 230269918 |
| chr1 | 233933369 | 233938564 |
| chr1 | 233933369 | 233945881 |
| chr1 | 234139092 | 234141171 |
| chr1 | 23520446  | 23520741  |
| chr1 | 235437036 | 235442102 |
| chr1 | 235606348 | 235607020 |
| chr1 | 235612123 | 235612503 |
| chr1 | 235612123 | 235612506 |
| chr1 | 235621906 | 235622674 |
| chr1 | 236400668 | 236401067 |
| chr1 | 236600425 | 236602654 |
| chr1 | 23766365  | 23767413  |
| chr1 | 2389034   | 2390858   |
| chr1 | 2393072   | 2403589   |
| chr1 | 2393269   | 2403589   |
| chr1 | 243348338 | 243348674 |
| chr1 | 24370789  | 24371340  |
| chr1 | 244659478 | 244672502 |
| chr1 | 244845246 | 244848856 |
| chr1 | 245853463 | 245885755 |
| chr1 | 245959914 | 245960630 |
| chr1 | 246143821 | 246193963 |
| chr1 | 246186742 | 246186942 |
| chr1 | 246186742 | 246193963 |
| chr1 | 246186742 | 246195464 |
| chr1 | 246186742 | 246199767 |
| chr1 | 246186742 | 246207459 |
| chr1 | 246186742 | 246219976 |
| chr1 | 246199688 | 246207505 |
| chr1 | 246881760 | 246882107 |
| chr1 | 246929974 | 246930654 |
| chr1 | 247155565 | 247159867 |
| chr1 | 247156405 | 247159867 |

|      |           |           |
|------|-----------|-----------|
| chr1 | 247156999 | 247159795 |
| chr1 | 248840171 | 248841840 |
| chr1 | 25306895  | 25318271  |
| chr1 | 25315937  | 25318271  |
| chr1 | 25867026  | 25868866  |
| chr1 | 26440047  | 26441019  |
| chr1 | 26711371  | 26711815  |
| chr1 | 26735580  | 26736030  |
| chr1 | 26737772  | 26738118  |
| chr1 | 26763187  | 26779779  |
| chr1 | 26884124  | 26886986  |
| chr1 | 27109543  | 27109798  |
| chr1 | 27486846  | 27487210  |
| chr1 | 27578555  | 27578778  |
| chr1 | 28011305  | 28011711  |
| chr1 | 28202012  | 28202389  |
| chr1 | 28329576  | 28329955  |
| chr1 | 28372167  | 28372574  |
| chr1 | 28372984  | 28394505  |
| chr1 | 28397994  | 28398535  |
| chr1 | 28430288  | 28430896  |
| chr1 | 28487273  | 28487831  |
| chr1 | 28519983  | 28520959  |
| chr1 | 28568086  | 28570329  |
| chr1 | 28572842  | 28575961  |
| chr1 | 28639313  | 28639972  |
| chr1 | 28752952  | 28753801  |
| chr1 | 28890322  | 28891801  |
| chr1 | 29148079  | 29168638  |
| chr1 | 29149008  | 29168638  |
| chr1 | 29166728  | 29168638  |
| chr1 | 29173727  | 29173957  |
| chr1 | 30948145  | 30948506  |
| chr1 | 31045096  | 31046139  |
| chr1 | 31045409  | 31045843  |
| chr1 | 32017165  | 32017702  |
| chr1 | 32040345  | 32041640  |
| chr1 | 32056181  | 32056670  |
| chr1 | 32164979  | 32165920  |
| chr1 | 32581790  | 32582667  |
| chr1 | 32674937  | 32679078  |
| chr1 | 32798170  | 32798589  |
| chr1 | 32814620  | 32815155  |
| chr1 | 32821224  | 32821536  |
| chr1 | 34856353  | 34856943  |

|      |          |          |
|------|----------|----------|
| chr1 | 35087508 | 35087982 |
| chr1 | 35090171 | 35090666 |
| chr1 | 35110338 | 35113181 |
| chr1 | 36170963 | 36173480 |
| chr1 | 36268087 | 36268820 |
| chr1 | 36275197 | 36277854 |
| chr1 | 36287476 | 36287871 |
| chr1 | 37537671 | 37542270 |
| chr1 | 37693629 | 37693919 |
| chr1 | 37805167 | 37806295 |
| chr1 | 37933642 | 37934043 |
| chr1 | 38868813 | 38869183 |
| chr1 | 38993711 | 38994925 |
| chr1 | 39030191 | 39030491 |
| chr1 | 39119904 | 39122396 |
| chr1 | 39161476 | 39166162 |
| chr1 | 39198732 | 39199080 |
| chr1 | 39214079 | 39215429 |
| chr1 | 39340501 | 39340953 |
| chr1 | 40088444 | 40089021 |
| chr1 | 40450655 | 40462597 |
| chr1 | 40695174 | 40695470 |
| chr1 | 41142873 | 41162951 |
| chr1 | 41846382 | 41849035 |
| chr1 | 41864577 | 41869630 |
| chr1 | 43588795 | 43591453 |
| chr1 | 44701178 | 44707389 |
| chr1 | 44703437 | 44707389 |
| chr1 | 44749324 | 44751309 |
| chr1 | 44763940 | 44764604 |
| chr1 | 44859580 | 44859866 |
| chr1 | 44866320 | 44866664 |
| chr1 | 45689163 | 45689588 |
| chr1 | 45810718 | 45810947 |
| chr1 | 46312455 | 46313277 |
| chr1 | 46587108 | 46587570 |
| chr1 | 47291283 | 47291685 |
| chr1 | 47335544 | 47335858 |
| chr1 | 51236733 | 51271473 |
| chr1 | 51251224 | 51251558 |
| chr1 | 51919926 | 51941834 |
| chr1 | 51922927 | 51923522 |
| chr1 | 52325394 | 52346917 |
| chr1 | 52338927 | 52346917 |
| chr1 | 52376437 | 52377132 |



|       |          |          |
|-------|----------|----------|
| chr1  | 52378586 | 52382689 |
| chr1  | 52404680 | 52416743 |
| chr1  | 52404680 | 52418104 |
| chr1  | 52913375 | 52914095 |
| chr1  | 52913894 | 52914095 |
| chr1  | 53302011 | 53302440 |
| chr1  | 53834076 | 53834847 |
| chr1  | 58576217 | 58718748 |
| chr1  | 58591300 | 58718748 |
| chr1  | 58637031 | 58715641 |
| chr1  | 61151067 | 61152356 |
| chr1  | 6120224  | 6120543  |
| chr1  | 61917987 | 61918363 |
| chr1  | 6193728  | 6194791  |
| chr1  | 6227856  | 6228374  |
| chr1  | 62455181 | 62492825 |
| chr1  | 63478764 | 63494287 |
| chr1  | 63499449 | 63500130 |
| chr1  | 67387626 | 67388455 |
| chr1  | 67395404 | 67402417 |
| chr1  | 70163378 | 70164145 |
| chr1  | 70163379 | 70164137 |
| chr1  | 70338021 | 70338519 |
| chr1  | 77633114 | 77675689 |
| chr1  | 7777158  | 7778165  |
| chr1  | 7978308  | 7979910  |
| chr1  | 85019152 | 85025779 |
| chr1  | 8592903  | 8593175  |
| chr1  | 8865314  | 8866394  |
| chr1  | 8872654  | 8874334  |
| chr1  | 88859132 | 88859592 |
| chr1  | 88859159 | 88859642 |
| chr1  | 92479166 | 92479587 |
| chr1  | 93154655 | 93162569 |
| chr1  | 93184022 | 93202048 |
| chr1  | 93620467 | 93621445 |
| chr1  | 93622203 | 93624958 |
| chr1  | 93633000 | 93661569 |
| chr1  | 93648040 | 93650141 |
| chr1  | 98014923 | 98019979 |
| chr1  | 9893008  | 9894243  |
| chr1  | 99429459 | 99492969 |
| chr1  | 99668622 | 99671404 |
| chr1  | 99872325 | 99872514 |
| chr20 | 13528445 | 13537049 |

|       |          |          |
|-------|----------|----------|
| chr20 | 13551886 | 13600617 |
| chr20 | 13806444 | 13807091 |
| chr20 | 14019557 | 14020182 |
| chr20 | 1772413  | 1776829  |
| chr20 | 17975464 | 17976218 |
| chr20 | 17985330 | 17986163 |
| chr20 | 19997666 | 19998073 |
| chr20 | 19998109 | 19998465 |
| chr20 | 20018495 | 20019023 |
| chr20 | 21207970 | 21208449 |
| chr20 | 24959156 | 24962857 |
| chr20 | 25558057 | 25558317 |
| chr20 | 25850572 | 25851795 |
| chr20 | 2663530  | 2665504  |
| chr20 | 2927917  | 2928230  |
| chr20 | 31556926 | 31557802 |
| chr20 | 31743121 | 31744257 |
| chr20 | 33667116 | 33668885 |
| chr20 | 34002990 | 34003560 |
| chr20 | 34023799 | 34024010 |
| chr20 | 34286027 | 34287500 |
| chr20 | 34471397 | 34507908 |
| chr20 | 34867202 | 34867481 |
| chr20 | 34920614 | 34927361 |
| chr20 | 35272522 | 35273161 |
| chr20 | 35409451 | 35409887 |
| chr20 | 35713560 | 35713800 |
| chr20 | 35718735 | 35719892 |
| chr20 | 35719599 | 35719892 |
| chr20 | 35727252 | 35727606 |
| chr20 | 35728035 | 35737602 |
| chr20 | 35800093 | 35812719 |
| chr20 | 35815346 | 35815566 |
| chr20 | 3626139  | 3626881  |
| chr20 | 36473241 | 36474009 |
| chr20 | 36517569 | 36517993 |
| chr20 | 36583804 | 36584641 |
| chr20 | 36587973 | 36590056 |
| chr20 | 36657454 | 36658213 |
| chr20 | 36781458 | 36781947 |
| chr20 | 37057907 | 37058654 |
| chr20 | 37064045 | 37064550 |
| chr20 | 37307182 | 37307537 |
| chr20 | 3761641  | 3763062  |
| chr20 | 37696673 | 37696945 |

|       |          |          |
|-------|----------|----------|
| chr20 | 37751485 | 37751666 |
| chr20 | 38070224 | 38070511 |
| chr20 | 38155028 | 38155448 |
| chr20 | 38420532 | 38422368 |
| chr20 | 39035349 | 39036439 |
| chr20 | 3933863  | 3939770  |
| chr20 | 43512888 | 43518703 |
| chr20 | 43675543 | 43676149 |
| chr20 | 45838054 | 45838477 |
| chr20 | 45885843 | 45888127 |
| chr20 | 45895795 | 45895981 |
| chr20 | 47214757 | 47216262 |
| chr20 | 48998250 | 48998532 |
| chr20 | 49041529 | 49041890 |
| chr20 | 49041529 | 49042685 |
| chr20 | 49042248 | 49042713 |
| chr20 | 49250213 | 49251215 |
| chr20 | 49518824 | 49519352 |
| chr20 | 50091496 | 50093923 |
| chr20 | 50938901 | 50939723 |
| chr20 | 51019132 | 51021018 |
| chr20 | 51349940 | 51396876 |
| chr20 | 5164026  | 5168187  |
| chr20 | 56378437 | 56379098 |
| chr20 | 58393980 | 58399040 |
| chr20 | 58999342 | 58999809 |
| chr20 | 59000359 | 59000911 |
| chr20 | 62276203 | 62276962 |
| chr20 | 63496081 | 63497371 |
| chr20 | 63498282 | 63498716 |
| chr20 | 6355479  | 6448711  |
| chr20 | 63594023 | 63594830 |
| chr20 | 63672082 | 63672549 |
| chr20 | 63736411 | 63736816 |
| chr20 | 63767398 | 63768118 |
| chr20 | 63804814 | 63805030 |
| chr20 | 63804814 | 63806718 |
| chr20 | 63817638 | 63820545 |
| chr20 | 63874340 | 63874890 |
| chr20 | 63898776 | 63899637 |
| chr20 | 63905258 | 63906959 |
| chr20 | 63910450 | 63910767 |
| chr20 | 63993998 | 63994526 |
| chr20 | 6436014  | 6477363  |
| chr21 | 22032384 | 22043087 |

|       |          |          |
|-------|----------|----------|
| chr21 | 22032384 | 22051350 |
| chr21 | 25605762 | 25606173 |
| chr21 | 25991608 | 25992189 |
| chr21 | 29552522 | 29559910 |
| chr21 | 29577029 | 29577891 |
| chr21 | 31461223 | 31477344 |
| chr21 | 32339304 | 32340342 |
| chr21 | 32481762 | 32482225 |
| chr21 | 33421533 | 33432796 |
| chr21 | 34102834 | 34142707 |
| chr21 | 34102834 | 34165036 |
| chr21 | 34129118 | 34129462 |
| chr21 | 36220969 | 36221318 |
| chr21 | 36373558 | 36374145 |
| chr21 | 36478388 | 36480375 |
| chr21 | 36969857 | 36973777 |
| chr21 | 37375050 | 37375837 |
| chr21 | 37415489 | 37421866 |
| chr21 | 37415489 | 37425781 |
| chr21 | 37415489 | 37430400 |
| chr21 | 38893960 | 38991024 |
| chr21 | 39395641 | 39396253 |
| chr21 | 42901349 | 42904885 |
| chr21 | 42978282 | 42980096 |
| chr21 | 42978289 | 42980091 |
| chr21 | 42979124 | 42979442 |
| chr21 | 42979370 | 43031617 |
| chr21 | 43529757 | 43595254 |
| chr21 | 45080997 | 45144701 |
| chr21 | 45116932 | 45144701 |
| chr22 | 17595276 | 17595631 |
| chr22 | 17656175 | 17656401 |
| chr22 | 17705180 | 17705392 |
| chr22 | 19328397 | 19331682 |
| chr22 | 19418554 | 19421781 |
| chr22 | 20485649 | 20487466 |
| chr22 | 20533780 | 20534261 |
| chr22 | 20710214 | 20710540 |
| chr22 | 20744307 | 20744573 |
| chr22 | 20758326 | 20759653 |
| chr22 | 21008778 | 21013184 |
| chr22 | 21600603 | 21608989 |
| chr22 | 21619922 | 21620100 |
| chr22 | 21770502 | 21770906 |
| chr22 | 21815333 | 21815771 |

|       |          |          |
|-------|----------|----------|
| chr22 | 23574214 | 23639569 |
| chr22 | 23814100 | 23814695 |
| chr22 | 24567653 | 24568436 |
| chr22 | 24568953 | 24571486 |
| chr22 | 24570590 | 24570913 |
| chr22 | 25180078 | 25181016 |
| chr22 | 26711829 | 26726794 |
| chr22 | 26726643 | 26738240 |
| chr22 | 27873681 | 27892330 |
| chr22 | 27930693 | 27966547 |
| chr22 | 28383019 | 28386469 |
| chr22 | 28499431 | 28519320 |
| chr22 | 28514565 | 28517279 |
| chr22 | 28514565 | 28519320 |
| chr22 | 28514756 | 28515716 |
| chr22 | 28514756 | 28517279 |
| chr22 | 28514756 | 28519320 |
| chr22 | 28514756 | 28528728 |
| chr22 | 28514756 | 28545577 |
| chr22 | 28514756 | 28550151 |
| chr22 | 28514756 | 28583669 |
| chr22 | 28515626 | 28517279 |
| chr22 | 28515626 | 28519320 |
| chr22 | 28547673 | 28550151 |
| chr22 | 28996203 | 28997730 |
| chr22 | 29341157 | 29341450 |
| chr22 | 29520789 | 29526272 |
| chr22 | 29606237 | 29606764 |
| chr22 | 30243739 | 30246797 |
| chr22 | 30926724 | 30968296 |
| chr22 | 31334946 | 31335249 |
| chr22 | 31786569 | 31786869 |
| chr22 | 31880922 | 31889635 |
| chr22 | 31888794 | 31890464 |
| chr22 | 32232605 | 32232962 |
| chr22 | 33847656 | 33880733 |
| chr22 | 36520407 | 36520981 |
| chr22 | 37612696 | 37613446 |
| chr22 | 37615671 | 37615935 |
| chr22 | 37678057 | 37678854 |
| chr22 | 37881672 | 37882024 |
| chr22 | 37939033 | 37939499 |
| chr22 | 38212519 | 38212838 |
| chr22 | 38252332 | 38252904 |
| chr22 | 38256162 | 38256461 |

|       |           |           |
|-------|-----------|-----------|
| chr22 | 38267726  | 38268122  |
| chr22 | 38267738  | 38268131  |
| chr22 | 38687299  | 38688344  |
| chr22 | 38791089  | 38791463  |
| chr22 | 39016494  | 39016952  |
| chr22 | 39314109  | 39316807  |
| chr22 | 39403827  | 39404132  |
| chr22 | 39403830  | 39404132  |
| chr22 | 39482235  | 39483234  |
| chr22 | 40278444  | 40278834  |
| chr22 | 40353908  | 40354588  |
| chr22 | 40788053  | 40788451  |
| chr22 | 40954241  | 40954812  |
| chr22 | 40956942  | 40957369  |
| chr22 | 40963117  | 40963359  |
| chr22 | 41276620  | 41278118  |
| chr22 | 41474879  | 41475610  |
| chr22 | 41530913  | 41531754  |
| chr22 | 41536903  | 41539122  |
| chr22 | 41849462  | 41849865  |
| chr22 | 42001099  | 42030823  |
| chr22 | 42935754  | 42935942  |
| chr22 | 44921971  | 44922363  |
| chr22 | 44977487  | 44978469  |
| chr22 | 46269906  | 46270270  |
| chr22 | 46310827  | 46311172  |
| chr22 | 46850465  | 46929635  |
| chr22 | 46974291  | 46978934  |
| chr22 | 47667764  | 47670405  |
| chr22 | 47747153  | 47747591  |
| chr22 | 49805973  | 49806804  |
| chr22 | 50409074  | 50409471  |
| chr22 | 50410874  | 50411377  |
| chr22 | 50728363  | 50728647  |
| chr2  | 101009391 | 101009838 |
| chr2  | 101703386 | 101703547 |
| chr2  | 101727954 | 101728528 |
| chr2  | 1055941   | 1056173   |
| chr2  | 108500471 | 108501077 |
| chr2  | 109191905 | 109193075 |
| chr2  | 109263130 | 109263685 |
| chr2  | 111344060 | 111480061 |
| chr2  | 112545664 | 112546015 |
| chr2  | 120019104 | 120175004 |
| chr2  | 120127717 | 120175004 |

|      |           |           |
|------|-----------|-----------|
| chr2 | 120278614 | 120280907 |
| chr2 | 120840579 | 120841536 |
| chr2 | 121582156 | 121582823 |
| chr2 | 121601567 | 121601922 |
| chr2 | 121759515 | 121760964 |
| chr2 | 127263992 | 127264232 |
| chr2 | 127520438 | 127521021 |
| chr2 | 127794800 | 127795182 |
| chr2 | 130156908 | 130157114 |
| chr2 | 131062980 | 131089336 |
| chr2 | 131067090 | 131089336 |
| chr2 | 131483963 | 131486181 |
| chr2 | 131684708 | 131733952 |
| chr2 | 135529637 | 135530132 |
| chr2 | 135565736 | 135568809 |
| chr2 | 148051909 | 148054449 |
| chr2 | 151465853 | 151475219 |
| chr2 | 151465853 | 151483335 |
| chr2 | 151506209 | 151507845 |
| chr2 | 151970280 | 151971704 |
| chr2 | 152075254 | 152087428 |
| chr2 | 152085567 | 152086011 |
| chr2 | 152414578 | 152450409 |
| chr2 | 152633351 | 152634178 |
| chr2 | 157857464 | 157860179 |
| chr2 | 158546297 | 158588987 |
| chr2 | 158994901 | 159011440 |
| chr2 | 159240183 | 159241115 |
| chr2 | 168046288 | 168048322 |
| chr2 | 168123791 | 168124519 |
| chr2 | 170752526 | 170753006 |
| chr2 | 171016000 | 171016251 |
| chr2 | 171052163 | 171053489 |
| chr2 | 173096623 | 173097101 |
| chr2 | 174139904 | 174140958 |
| chr2 | 174452927 | 174453384 |
| chr2 | 177214730 | 177215110 |
| chr2 | 177231888 | 177234237 |
| chr2 | 177245908 | 177247401 |
| chr2 | 178210734 | 178212889 |
| chr2 | 178216770 | 178230513 |
| chr2 | 178434394 | 178434839 |
| chr2 | 178539949 | 178644501 |
| chr2 | 178636573 | 178695451 |
| chr2 | 179826474 | 179941285 |

|      |           |           |
|------|-----------|-----------|
| chr2 | 185757579 | 185788943 |
| chr2 | 190886126 | 190886661 |
| chr2 | 196856323 | 196859055 |
| chr2 | 197301233 | 197303448 |
| chr2 | 197559625 | 197590606 |
| chr2 | 199309461 | 199312663 |
| chr2 | 200460658 | 200460907 |
| chr2 | 200573807 | 200583559 |
| chr2 | 200938301 | 200938801 |
| chr2 | 201277978 | 201278809 |
| chr2 | 202292224 | 202292404 |
| chr2 | 202382857 | 202386960 |
| chr2 | 202403038 | 202403792 |
| chr2 | 20267296  | 20268380  |
| chr2 | 202914686 | 202915111 |
| chr2 | 203351554 | 203383321 |
| chr2 | 203416913 | 203427269 |
| chr2 | 207719578 | 207719911 |
| chr2 | 207746883 | 207747643 |
| chr2 | 210019143 | 210019623 |
| chr2 | 210041686 | 210043132 |
| chr2 | 210150763 | 210151097 |
| chr2 | 211908742 | 211968374 |
| chr2 | 216120966 | 216123569 |
| chr2 | 216302512 | 216302666 |
| chr2 | 218239675 | 218243698 |
| chr2 | 218635682 | 218636642 |
| chr2 | 218635704 | 218636642 |
| chr2 | 218715900 | 218716514 |
| chr2 | 218735460 | 218736101 |
| chr2 | 223878528 | 223899021 |
| chr2 | 224556294 | 224558241 |
| chr2 | 232701710 | 232702153 |
| chr2 | 232723641 | 232730391 |
| chr2 | 232922245 | 232922597 |
| chr2 | 233267256 | 233271373 |
| chr2 | 233359516 | 233372183 |
| chr2 | 233372044 | 233376936 |
| chr2 | 233403490 | 233403695 |
| chr2 | 234974936 | 234975195 |
| chr2 | 235524414 | 235524713 |
| chr2 | 235585724 | 235590023 |
| chr2 | 235585724 | 235595045 |
| chr2 | 236259506 | 236268343 |
| chr2 | 237676867 | 237684755 |



|      |           |           |
|------|-----------|-----------|
| chr2 | 237682624 | 237683495 |
| chr2 | 237769625 | 237779457 |
| chr2 | 23792349  | 23792716  |
| chr2 | 238061758 | 238073847 |
| chr2 | 238179105 | 238179916 |
| chr2 | 238433312 | 238446655 |
| chr2 | 238433548 | 238446655 |
| chr2 | 239377050 | 239379053 |
| chr2 | 23989391  | 23989819  |
| chr2 | 241502734 | 241504942 |
| chr2 | 24564294  | 24593721  |
| chr2 | 24595670  | 24596113  |
| chr2 | 24823955  | 24824639  |
| chr2 | 26069573  | 26069800  |
| chr2 | 26257385  | 26257748  |
| chr2 | 27034872  | 27035042  |
| chr2 | 27052332  | 27070212  |
| chr2 | 27229313  | 27229547  |
| chr2 | 27404925  | 27405155  |
| chr2 | 27656082  | 27656762  |
| chr2 | 28757097  | 28758305  |
| chr2 | 29120029  | 29174525  |
| chr2 | 31073062  | 31085023  |
| chr2 | 31073062  | 31132712  |
| chr2 | 32002665  | 32002933  |
| chr2 | 32295813  | 32296258  |
| chr2 | 32302292  | 32303078  |
| chr2 | 3243995   | 3244297   |
| chr2 | 3243995   | 3261827   |
| chr2 | 32494503  | 32494770  |
| chr2 | 3456946   | 3485844   |
| chr2 | 36358903  | 36360192  |
| chr2 | 36369107  | 36370407  |
| chr2 | 36378356  | 36413019  |
| chr2 | 36387971  | 36413019  |
| chr2 | 36463062  | 36463203  |
| chr2 | 36517331  | 36522274  |
| chr2 | 37091434  | 37104132  |
| chr2 | 37306495  | 37317179  |
| chr2 | 38121984  | 38147998  |
| chr2 | 38339197  | 38339772  |
| chr2 | 39736821  | 39769758  |
| chr2 | 40322550  | 40430301  |
| chr2 | 40347906  | 40348903  |
| chr2 | 42278843  | 42279552  |

|      |          |          |
|------|----------|----------|
| chr2 | 42413698 | 42456361 |
| chr2 | 42571869 | 42574216 |
| chr2 | 44174761 | 44180397 |
| chr2 | 44490785 | 44505730 |
| chr2 | 44490785 | 44549728 |
| chr2 | 44502688 | 44505730 |
| chr2 | 44505632 | 44537721 |
| chr2 | 44505632 | 44549728 |
| chr2 | 44549554 | 44558013 |
| chr2 | 45677831 | 45701491 |
| chr2 | 45697940 | 45701491 |
| chr2 | 45697940 | 45701524 |
| chr2 | 45840379 | 45860198 |
| chr2 | 46971029 | 46976387 |
| chr2 | 47792224 | 47793093 |
| chr2 | 48350091 | 48350640 |
| chr2 | 53966969 | 53967411 |
| chr2 | 54785196 | 54788051 |
| chr2 | 55261275 | 55261678 |
| chr2 | 55843992 | 55873968 |
| chr2 | 61157861 | 61164540 |
| chr2 | 61178980 | 61186754 |
| chr2 | 61178980 | 61186781 |
| chr2 | 61178980 | 61187029 |
| chr2 | 61197271 | 61197791 |
| chr2 | 61294268 | 61294528 |
| chr2 | 61479374 | 61479675 |
| chr2 | 61516341 | 61516712 |
| chr2 | 63180166 | 63181021 |
| chr2 | 64555496 | 64556038 |
| chr2 | 65093925 | 65095885 |
| chr2 | 65237347 | 65238042 |
| chr2 | 70246234 | 70246609 |
| chr2 | 7068215  | 7075684  |
| chr2 | 72680613 | 72721164 |
| chr2 | 73985979 | 74010653 |
| chr2 | 74156417 | 74172749 |
| chr2 | 77939830 | 77951533 |
| chr2 | 77939830 | 78002142 |
| chr2 | 77987569 | 78002142 |
| chr2 | 78076535 | 78076954 |
| chr2 | 78199604 | 78203781 |
| chr2 | 78199604 | 78203818 |
| chr2 | 79799311 | 79800671 |
| chr2 | 84850010 | 84853410 |

|      |           |           |
|------|-----------|-----------|
| chr2 | 86111495  | 86112151  |
| chr2 | 9237832   | 9239953   |
| chr2 | 9395382   | 9395702   |
| chr2 | 9410142   | 9411459   |
| chr2 | 9410807   | 9411533   |
| chr2 | 95148884  | 95159373  |
| chr2 | 9581670   | 9616809   |
| chr2 | 96015108  | 96023245  |
| chr2 | 96236683  | 96242141  |
| chr2 | 96349637  | 96351414  |
| chr2 | 98462383  | 98462899  |
| chr2 | 99466465  | 99476362  |
| chr3 | 10046285  | 10065020  |
| chr3 | 10240386  | 10240618  |
| chr3 | 111112284 | 111134205 |
| chr3 | 112567133 | 112567388 |
| chr3 | 11399283  | 11399625  |
| chr3 | 11426879  | 11574118  |
| chr3 | 11553105  | 11553270  |
| chr3 | 11573921  | 11574118  |
| chr3 | 121430388 | 121433036 |
| chr3 | 121525263 | 121533986 |
| chr3 | 121533791 | 121535484 |
| chr3 | 123243811 | 123264771 |
| chr3 | 125313326 | 125323387 |
| chr3 | 125467932 | 125479777 |
| chr3 | 125514811 | 125515568 |
| chr3 | 125848229 | 125848447 |
| chr3 | 125848229 | 125857101 |
| chr3 | 126741359 | 126741905 |
| chr3 | 127013397 | 127013756 |
| chr3 | 128044086 | 128091582 |
| chr3 | 128303310 | 128305030 |
| chr3 | 128906426 | 128906728 |
| chr3 | 129756695 | 129757573 |
| chr3 | 129838897 | 129880562 |
| chr3 | 129857249 | 129880562 |
| chr3 | 129857249 | 129889104 |
| chr3 | 129860939 | 129880562 |
| chr3 | 130679326 | 130716498 |
| chr3 | 130918899 | 130919319 |
| chr3 | 135997500 | 136018737 |
| chr3 | 136315603 | 136316551 |
| chr3 | 136709391 | 136715592 |
| chr3 | 136709391 | 136720173 |

|      |           |           |
|------|-----------|-----------|
| chr3 | 136713457 | 136720173 |
| chr3 | 136832291 | 136832792 |
| chr3 | 138069010 | 138070596 |
| chr3 | 138498652 | 138499662 |
| chr3 | 138542690 | 138572984 |
| chr3 | 142486884 | 142487399 |
| chr3 | 151795738 | 151803925 |
| chr3 | 151803705 | 151803925 |
| chr3 | 155846753 | 155847480 |
| chr3 | 155890667 | 155937881 |
| chr3 | 15721765  | 15722310  |
| chr3 | 158218689 | 158219715 |
| chr3 | 165503224 | 165519587 |
| chr3 | 168044036 | 168044407 |
| chr3 | 168057080 | 168057613 |
| chr3 | 168075572 | 168076442 |
| chr3 | 169821890 | 169837653 |
| chr3 | 17004027  | 17025126  |
| chr3 | 170062432 | 170062992 |
| chr3 | 170077320 | 170080646 |
| chr3 | 170097171 | 170113456 |
| chr3 | 170269865 | 170274226 |
| chr3 | 171787426 | 171789535 |
| chr3 | 172079353 | 172081715 |
| chr3 | 17562018  | 17586557  |
| chr3 | 17562018  | 17733460  |
| chr3 | 17586352  | 17625224  |
| chr3 | 17586352  | 17647056  |
| chr3 | 17622647  | 17625224  |
| chr3 | 17622647  | 17672705  |
| chr3 | 17622647  | 17681616  |
| chr3 | 17622647  | 17733460  |
| chr3 | 177152010 | 177152367 |
| chr3 | 178841544 | 178982465 |
| chr3 | 179253007 | 179253574 |
| chr3 | 179566889 | 179567147 |
| chr3 | 182894792 | 182895982 |
| chr3 | 183015418 | 183022557 |
| chr3 | 184303706 | 184305926 |
| chr3 | 184305396 | 184307045 |
| chr3 | 184318543 | 184318794 |
| chr3 | 184363973 | 184364275 |
| chr3 | 185473191 | 185490201 |
| chr3 | 185590477 | 185597403 |
| chr3 | 186942347 | 186996673 |

|      |           |           |
|------|-----------|-----------|
| chr3 | 189207109 | 189220027 |
| chr3 | 192583187 | 192728554 |
| chr3 | 192664074 | 192745356 |
| chr3 | 192880501 | 192880750 |
| chr3 | 195245088 | 195245270 |
| chr3 | 195247999 | 195248401 |
| chr3 | 195248036 | 195248401 |
| chr3 | 195357690 | 195412916 |
| chr3 | 195365481 | 195412916 |
| chr3 | 195410706 | 195412916 |
| chr3 | 195437731 | 195438135 |
| chr3 | 195438188 | 195438622 |
| chr3 | 195890673 | 195891205 |
| chr3 | 195959182 | 195960423 |
| chr3 | 196061801 | 196062273 |
| chr3 | 196078623 | 196078856 |
| chr3 | 196213715 | 196218759 |
| chr3 | 196245384 | 196245731 |
| chr3 | 196321303 | 196322714 |
| chr3 | 196330102 | 196332075 |
| chr3 | 196356357 | 196397216 |
| chr3 | 196714672 | 196714862 |
| chr3 | 196916234 | 196916622 |
| chr3 | 197613224 | 197624720 |
| chr3 | 23259618  | 23310727  |
| chr3 | 23309839  | 23310727  |
| chr3 | 23310160  | 23310727  |
| chr3 | 23898003  | 23898399  |
| chr3 | 27381867  | 27382359  |
| chr3 | 28251711  | 28253765  |
| chr3 | 28251711  | 28267654  |
| chr3 | 29288282  | 29334644  |
| chr3 | 29467130  | 29467606  |
| chr3 | 32334790  | 32391383  |
| chr3 | 32565861  | 32566527  |
| chr3 | 32770557  | 32772083  |
| chr3 | 33298603  | 33299136  |
| chr3 | 33388853  | 33412798  |
| chr3 | 33699800  | 33701200  |
| chr3 | 37010833  | 37011224  |
| chr3 | 38216672  | 38220507  |
| chr3 | 39076170  | 39084727  |
| chr3 | 40309870  | 40312169  |
| chr3 | 42184752  | 42223184  |
| chr3 | 43531811  | 43535385  |

|      |          |          |
|------|----------|----------|
| chr3 | 44578289 | 44578740 |
| chr3 | 45130412 | 45131981 |
| chr3 | 45519398 | 45519742 |
| chr3 | 47052738 | 47052999 |
| chr3 | 47174039 | 47175828 |
| chr3 | 47179427 | 47179683 |
| chr3 | 47414222 | 47414925 |
| chr3 | 47506992 | 47507535 |
| chr3 | 47507283 | 47508874 |
| chr3 | 47696794 | 47697769 |
| chr3 | 47897376 | 47897743 |
| chr3 | 48441097 | 48443456 |
| chr3 | 48698564 | 48699345 |
| chr3 | 49040410 | 49041553 |
| chr3 | 49395125 | 49404987 |
| chr3 | 49781349 | 49785256 |
| chr3 | 50043965 | 50044498 |
| chr3 | 50051563 | 50052146 |
| chr3 | 50073353 | 50073518 |
| chr3 | 51490154 | 51492513 |
| chr3 | 51541497 | 51552063 |
| chr3 | 51541497 | 51573326 |
| chr3 | 51541588 | 51552063 |
| chr3 | 5192269  | 5216410  |
| chr3 | 52255246 | 52260059 |
| chr3 | 52467231 | 52467856 |
| chr3 | 52579017 | 52579255 |
| chr3 | 52581482 | 52581719 |
| chr3 | 52637868 | 52638468 |
| chr3 | 53018085 | 53043254 |
| chr3 | 53252062 | 53252949 |
| chr3 | 56570090 | 56570499 |
| chr3 | 57909424 | 57909694 |
| chr3 | 60215076 | 60233983 |
| chr3 | 61584737 | 61623555 |
| chr3 | 61617659 | 61623140 |
| chr3 | 61617659 | 61623555 |
| chr3 | 61621969 | 61623140 |
| chr3 | 61621969 | 61623555 |
| chr3 | 61622462 | 61623140 |
| chr3 | 61622462 | 61623555 |
| chr3 | 61981707 | 62015932 |
| chr3 | 65609743 | 65609966 |
| chr3 | 65609743 | 65659051 |
| chr3 | 65717301 | 65718614 |

|      |           |           |
|------|-----------|-----------|
| chr3 | 65717301  | 65725748  |
| chr3 | 69794386  | 69805435  |
| chr3 | 71287702  | 71287990  |
| chr3 | 71697323  | 71699907  |
| chr3 | 75711186  | 75784885  |
| chr3 | 78932470  | 78965428  |
| chr3 | 8703025   | 8840297   |
| chr3 | 88084603  | 88086402  |
| chr3 | 9418732   | 9418882   |
| chr3 | 9421322   | 9421592   |
| chr3 | 97877896  | 97943570  |
| chr3 | 97956793  | 97957238  |
| chr3 | 9987814   | 9998899   |
| chr4 | 10085992  | 10087508  |
| chr4 | 102304337 | 102315742 |
| chr4 | 102779587 | 102787190 |
| chr4 | 103343091 | 103437842 |
| chr4 | 103343091 | 103453812 |
| chr4 | 103536345 | 103593429 |
| chr4 | 103547853 | 103593429 |
| chr4 | 103548742 | 103593429 |
| chr4 | 103569300 | 103593429 |
| chr4 | 105195137 | 105261320 |
| chr4 | 108594669 | 108598695 |
| chr4 | 110190913 | 110191766 |
| chr4 | 112180673 | 112186836 |
| chr4 | 112808902 | 112819813 |
| chr4 | 113607973 | 113679496 |
| chr4 | 118056661 | 118136735 |
| chr4 | 118251568 | 118259075 |
| chr4 | 118299577 | 118300140 |
| chr4 | 118724590 | 118728053 |
| chr4 | 119488293 | 119488717 |
| chr4 | 121825847 | 121847094 |
| chr4 | 122838973 | 122892296 |
| chr4 | 123071387 | 123075393 |
| chr4 | 124457180 | 124642014 |
| chr4 | 124641877 | 124669791 |
| chr4 | 128017357 | 128021238 |
| chr4 | 129724509 | 129782025 |
| chr4 | 13425109  | 13426354  |
| chr4 | 13425109  | 13428299  |
| chr4 | 139021405 | 139021964 |
| chr4 | 142654586 | 142729497 |
| chr4 | 143859015 | 143939920 |

|      |           |           |
|------|-----------|-----------|
| chr4 | 143865970 | 143982026 |
| chr4 | 143974446 | 144076453 |
| chr4 | 145125948 | 145132087 |
| chr4 | 147963647 | 147992009 |
| chr4 | 148384591 | 148384916 |
| chr4 | 151586760 | 151662628 |
| chr4 | 15684849  | 15687148  |
| chr4 | 169212854 | 169217154 |
| chr4 | 169240477 | 169240999 |
| chr4 | 169694746 | 169700352 |
| chr4 | 1710184   | 1710809   |
| chr4 | 1718511   | 1719215   |
| chr4 | 173039859 | 173056657 |
| chr4 | 173224113 | 173226809 |
| chr4 | 173224309 | 173230033 |
| chr4 | 173384650 | 173403950 |
| chr4 | 17617814  | 17618611  |
| chr4 | 17815804  | 17816855  |
| chr4 | 182874569 | 182916539 |
| chr4 | 183966370 | 183966640 |
| chr4 | 185181636 | 185182828 |
| chr4 | 185314632 | 185315529 |
| chr4 | 186592000 | 186592905 |
| chr4 | 20280268  | 20280877  |
| chr4 | 20617025  | 20617590  |
| chr4 | 20700670  | 20727397  |
| chr4 | 22727390  | 22727772  |
| chr4 | 24583325  | 24583644  |
| chr4 | 2474285   | 2488905   |
| chr4 | 2488370   | 2488905   |
| chr4 | 253099    | 254837    |
| chr4 | 25318635  | 25319106  |
| chr4 | 2625261   | 2648225   |
| chr4 | 2642211   | 2642827   |
| chr4 | 351030    | 352104    |
| chr4 | 38680957  | 38682153  |
| chr4 | 39185990  | 39186337  |
| chr4 | 39528942  | 39529145  |
| chr4 | 39530446  | 39532291  |
| chr4 | 39750994  | 39751412  |
| chr4 | 39750994  | 39751420  |
| chr4 | 39759544  | 39759926  |
| chr4 | 39829874  | 39830541  |
| chr4 | 39864101  | 39865613  |
| chr4 | 40971047  | 41002112  |



|      |           |           |
|------|-----------|-----------|
| chr4 | 40978403  | 40986415  |
| chr4 | 41004759  | 41005200  |
| chr4 | 42039693  | 42040569  |
| chr4 | 4275926   | 4276663   |
| chr4 | 430343    | 437511    |
| chr4 | 4308658   | 4308861   |
| chr4 | 435769    | 437511    |
| chr4 | 435769    | 438632    |
| chr4 | 44293403  | 44311727  |
| chr4 | 467776    | 468821    |
| chr4 | 468754    | 497286    |
| chr4 | 4760545   | 4763048   |
| chr4 | 48151785  | 48152178  |
| chr4 | 48645947  | 48710637  |
| chr4 | 48672989  | 48687160  |
| chr4 | 51860542  | 51914078  |
| chr4 | 51863444  | 51887244  |
| chr4 | 53015464  | 53018527  |
| chr4 | 56496896  | 56497314  |
| chr4 | 56504266  | 56507370  |
| chr4 | 5865242   | 5870712   |
| chr4 | 67619029  | 67624165  |
| chr4 | 67728539  | 67745973  |
| chr4 | 67728539  | 67768696  |
| chr4 | 67745826  | 67790511  |
| chr4 | 70829043  | 70829395  |
| chr4 | 70933978  | 70934296  |
| chr4 | 73217536  | 73235090  |
| chr4 | 74330197  | 74374839  |
| chr4 | 75516782  | 75527598  |
| chr4 | 7932157   | 7933310   |
| chr4 | 80287336  | 80376917  |
| chr4 | 80295558  | 80336902  |
| chr4 | 80301282  | 80420400  |
| chr4 | 80575886  | 80648987  |
| chr4 | 82871761  | 82872299  |
| chr4 | 84879405  | 84898597  |
| chr4 | 88419301  | 88420428  |
| chr4 | 88419573  | 88437762  |
| chr4 | 920280    | 920625    |
| chr4 | 924107    | 928167    |
| chr4 | 98583518  | 98586087  |
| chr4 | 98915786  | 98915997  |
| chr4 | 98922517  | 98922935  |
| chr5 | 100536548 | 100586336 |

|      |           |           |
|------|-----------|-----------|
| chr5 | 10213490  | 10227663  |
| chr5 | 10681378  | 10682305  |
| chr5 | 108341926 | 108378726 |
| chr5 | 108980624 | 108985487 |
| chr5 | 109789000 | 109866994 |
| chr5 | 11118430  | 11121808  |
| chr5 | 115282543 | 115283022 |
| chr5 | 115539664 | 115542901 |
| chr5 | 115852978 | 115913513 |
| chr5 | 116317516 | 116399622 |
| chr5 | 116317516 | 116412760 |
| chr5 | 116379424 | 116552127 |
| chr5 | 116446163 | 116471255 |
| chr5 | 120639290 | 120676919 |
| chr5 | 122829052 | 122829249 |
| chr5 | 126585861 | 126586844 |
| chr5 | 126793647 | 126794160 |
| chr5 | 126803121 | 126803296 |
| chr5 | 126808730 | 126836300 |
| chr5 | 128064736 | 128077093 |
| chr5 | 131653520 | 131653823 |
| chr5 | 132365026 | 132365890 |
| chr5 | 132920343 | 132920876 |
| chr5 | 132961037 | 132961442 |
| chr5 | 133085025 | 133085432 |
| chr5 | 133096171 | 133098602 |
| chr5 | 134166497 | 134167632 |
| chr5 | 134317389 | 134317988 |
| chr5 | 134379553 | 134380010 |
| chr5 | 134668661 | 134669527 |
| chr5 | 134685896 | 134686329 |
| chr5 | 134767551 | 134770598 |
| chr5 | 134772166 | 134772837 |
| chr5 | 134799645 | 134800042 |
| chr5 | 134942480 | 134960698 |
| chr5 | 137757866 | 137859214 |
| chr5 | 137757866 | 137861931 |
| chr5 | 137999241 | 138000302 |
| chr5 | 138030544 | 138030773 |
| chr5 | 138296505 | 138299431 |
| chr5 | 139061636 | 139104698 |
| chr5 | 139281430 | 139285530 |
| chr5 | 139288794 | 139289268 |
| chr5 | 139290286 | 139290590 |
| chr5 | 139417112 | 139417683 |

|      |           |           |
|------|-----------|-----------|
| chr5 | 139598840 | 139600075 |
| chr5 | 140210805 | 140211646 |
| chr5 | 140245929 | 140300557 |
| chr5 | 140251546 | 140263281 |
| chr5 | 140302283 | 140303033 |
| chr5 | 140665581 | 140666114 |
| chr5 | 140925895 | 140928738 |
| chr5 | 140925895 | 140931106 |
| chr5 | 141410978 | 141411458 |
| chr5 | 141593748 | 141594268 |
| chr5 | 141594126 | 141594773 |
| chr5 | 141936713 | 141937491 |
| chr5 | 14219408  | 14222930  |
| chr5 | 14219408  | 14242944  |
| chr5 | 142390920 | 142467831 |
| chr5 | 14269938  | 14283798  |
| chr5 | 142789429 | 142792773 |
| chr5 | 14286145  | 14286398  |
| chr5 | 146237918 | 146238273 |
| chr5 | 14809713  | 14810077  |
| chr5 | 148634865 | 148677235 |
| chr5 | 149371499 | 149393912 |
| chr5 | 149541534 | 149545831 |
| chr5 | 150364956 | 150365889 |
| chr5 | 150367868 | 150368846 |
| chr5 | 150521305 | 150553328 |
| chr5 | 150594047 | 150626886 |
| chr5 | 150614557 | 150626886 |
| chr5 | 150622474 | 150633928 |
| chr5 | 150623034 | 150626886 |
| chr5 | 150626662 | 150633928 |
| chr5 | 151033048 | 151058030 |
| chr5 | 151795236 | 151796312 |
| chr5 | 151853271 | 151889465 |
| chr5 | 151857705 | 151906708 |
| chr5 | 151946638 | 152055452 |
| chr5 | 152094539 | 152095575 |
| chr5 | 154779768 | 154780812 |
| chr5 | 154823198 | 154824092 |
| chr5 | 15545854  | 15547424  |
| chr5 | 15628257  | 15634464  |
| chr5 | 157505716 | 157507116 |
| chr5 | 157731514 | 157734618 |
| chr5 | 157733541 | 157733765 |
| chr5 | 157745724 | 157758701 |

|      |           |           |
|------|-----------|-----------|
| chr5 | 157830237 | 157830626 |
| chr5 | 157841488 | 157841730 |
| chr5 | 160018888 | 160065766 |
| chr5 | 160023163 | 160025122 |
| chr5 | 160063541 | 160066612 |
| chr5 | 160063541 | 160066871 |
| chr5 | 160077977 | 160089610 |
| chr5 | 160089505 | 160108614 |
| chr5 | 160096760 | 160097227 |
| chr5 | 160257397 | 160257956 |
| chr5 | 1611668   | 1612072   |
| chr5 | 16668431  | 16670752  |
| chr5 | 16916054  | 16917042  |
| chr5 | 171028871 | 171034980 |
| chr5 | 171394451 | 171394902 |
| chr5 | 171396216 | 171396668 |
| chr5 | 171987706 | 171988631 |
| chr5 | 171995806 | 171997051 |
| chr5 | 172123968 | 172124173 |
| chr5 | 172184954 | 172186013 |
| chr5 | 172185566 | 172186008 |
| chr5 | 172254401 | 172255817 |
| chr5 | 172259407 | 172259810 |
| chr5 | 172270650 | 172271169 |
| chr5 | 172274432 | 172274795 |
| chr5 | 172864148 | 172864303 |
| chr5 | 172960365 | 172963110 |
| chr5 | 175765155 | 175940995 |
| chr5 | 176308202 | 176308611 |
| chr5 | 176494795 | 176496233 |
| chr5 | 176972697 | 176972997 |
| chr5 | 177164850 | 177165266 |
| chr5 | 177167023 | 177167260 |
| chr5 | 177460390 | 177467003 |
| chr5 | 178885613 | 178931326 |
| chr5 | 179582376 | 179582674 |
| chr5 | 179600946 | 179608675 |
| chr5 | 179621782 | 179622010 |
| chr5 | 179831569 | 179831878 |
| chr5 | 179839173 | 179840054 |
| chr5 | 179875815 | 179876452 |
| chr5 | 179957412 | 179957909 |
| chr5 | 179969484 | 179970326 |
| chr5 | 179999265 | 179999503 |
| chr5 | 180199823 | 180201334 |

|      |           |           |
|------|-----------|-----------|
| chr5 | 180494694 | 180574269 |
| chr5 | 180495651 | 180529414 |
| chr5 | 180513649 | 180514105 |
| chr5 | 180550023 | 180576684 |
| chr5 | 180851380 | 180856249 |
| chr5 | 181237641 | 181239566 |
| chr5 | 27472382  | 27525163  |
| chr5 | 31474661  | 31475070  |
| chr5 | 32438567  | 32440387  |
| chr5 | 34048649  | 34049185  |
| chr5 | 34051881  | 34064715  |
| chr5 | 34064262  | 34064715  |
| chr5 | 34658995  | 34757614  |
| chr5 | 34733115  | 34750581  |
| chr5 | 34788183  | 34788688  |
| chr5 | 37061586  | 37061936  |
| chr5 | 37533137  | 37534043  |
| chr5 | 43171459  | 43171805  |
| chr5 | 50399106  | 50411312  |
| chr5 | 60834300  | 60834554  |
| chr5 | 60962740  | 60962980  |
| chr5 | 61417077  | 61418325  |
| chr5 | 614469    | 614681    |
| chr5 | 614469    | 655584    |
| chr5 | 62517105  | 62517497  |
| chr5 | 65197192  | 65198360  |
| chr5 | 65317997  | 65319953  |
| chr5 | 65435903  | 65436604  |
| chr5 | 69282889  | 69286086  |
| chr5 | 69561033  | 69562042  |
| chr5 | 71461100  | 71461494  |
| chr5 | 72283504  | 72320526  |
| chr5 | 77098654  | 77100391  |
| chr5 | 78370619  | 78374339  |
| chr5 | 78459265  | 78475706  |
| chr5 | 78625024  | 78626891  |
| chr5 | 80186447  | 80186884  |
| chr5 | 80410832  | 80413190  |
| chr5 | 80448221  | 80451607  |
| chr5 | 80638812  | 80640027  |
| chr5 | 80657338  | 80658153  |
| chr5 | 81981308  | 82129769  |
| chr5 | 84009343  | 84012230  |
| chr5 | 88220589  | 88231786  |
| chr5 | 88220589  | 88250324  |

|      |           |           |
|------|-----------|-----------|
| chr5 | 88305931  | 88313930  |
| chr5 | 93682949  | 93683210  |
| chr5 | 95782717  | 95783216  |
| chr5 | 97581813  | 97670684  |
| chr5 | 98884345  | 98885153  |
| chr6 | 107324555 | 107359828 |
| chr6 | 10757898  | 10759013  |
| chr6 | 107946201 | 107946760 |
| chr6 | 107946434 | 107946810 |
| chr6 | 107955464 | 107955692 |
| chr6 | 108235884 | 108236411 |
| chr6 | 108298496 | 108299024 |
| chr6 | 108319616 | 108332999 |
| chr6 | 108567171 | 108569742 |
| chr6 | 109050172 | 109051618 |
| chr6 | 109451469 | 109452925 |
| chr6 | 11144493  | 11207574  |
| chr6 | 111469195 | 111474479 |
| chr6 | 111486299 | 111497979 |
| chr6 | 118894026 | 118895339 |
| chr6 | 12077492  | 12078049  |
| chr6 | 126008656 | 126009334 |
| chr6 | 126013043 | 126038925 |
| chr6 | 126014803 | 126021123 |
| chr6 | 126324663 | 126435320 |
| chr6 | 128409293 | 128411334 |
| chr6 | 129463399 | 129502791 |
| chr6 | 129494067 | 129558166 |
| chr6 | 129494181 | 129558166 |
| chr6 | 129502604 | 129528738 |
| chr6 | 129502604 | 129558166 |
| chr6 | 130287819 | 130288395 |
| chr6 | 130288226 | 130334845 |
| chr6 | 130288226 | 130341122 |
| chr6 | 130311290 | 130334845 |
| chr6 | 130311290 | 130341122 |
| chr6 | 131030966 | 131031817 |
| chr6 | 131031692 | 131033905 |
| chr6 | 131869441 | 131877142 |
| chr6 | 136047308 | 136094247 |
| chr6 | 142820032 | 142823253 |
| chr6 | 14284194  | 14292214  |
| chr6 | 142901663 | 142926022 |
| chr6 | 142917195 | 142918075 |
| chr6 | 142949512 | 142983812 |

|      |           |           |
|------|-----------|-----------|
| chr6 | 143555164 | 143558644 |
| chr6 | 144578125 | 144578416 |
| chr6 | 149643989 | 149644349 |
| chr6 | 149670107 | 149672304 |
| chr6 | 149734100 | 149734547 |
| chr6 | 149759765 | 149760573 |
| chr6 | 149803988 | 149804608 |
| chr6 | 149826029 | 149828631 |
| chr6 | 151331792 | 151332131 |
| chr6 | 151412672 | 151418603 |
| chr6 | 15306593  | 15306987  |
| chr6 | 156799659 | 156806004 |
| chr6 | 156979804 | 156980222 |
| chr6 | 157584519 | 157608402 |
| chr6 | 158570673 | 158571706 |
| chr6 | 16391084  | 16392605  |
| chr6 | 1675210   | 1675608   |
| chr6 | 17398772  | 17400596  |
| chr6 | 17655684  | 17656011  |
| chr6 | 17671056  | 17671794  |
| chr6 | 17671097  | 17674508  |
| chr6 | 2283498   | 2283763   |
| chr6 | 2283498   | 2306526   |
| chr6 | 24705725  | 24714354  |
| chr6 | 24714872  | 24715633  |
| chr6 | 26467192  | 26467434  |
| chr6 | 29001182  | 29007522  |
| chr6 | 29889112  | 29927834  |
| chr6 | 30629325  | 30630236  |
| chr6 | 30637605  | 30638402  |
| chr6 | 30733280  | 30733547  |
| chr6 | 31759200  | 31759349  |
| chr6 | 33266919  | 33267307  |
| chr6 | 33272898  | 33275406  |
| chr6 | 33302620  | 33303200  |
| chr6 | 33302906  | 33303205  |
| chr6 | 33307223  | 33307496  |
| chr6 | 33309819  | 33310754  |
| chr6 | 34240770  | 34245641  |
| chr6 | 34638194  | 34638453  |
| chr6 | 35659040  | 35659329  |
| chr6 | 35672591  | 35679074  |
| chr6 | 35672591  | 35680422  |
| chr6 | 35855224  | 35855844  |
| chr6 | 35867733  | 35868082  |

|      |          |          |
|------|----------|----------|
| chr6 | 36682407 | 36682687 |
| chr6 | 36740802 | 36764250 |
| chr6 | 36970786 | 36971068 |
| chr6 | 36974060 | 36974899 |
| chr6 | 36977369 | 36977534 |
| chr6 | 37862977 | 37939219 |
| chr6 | 41134556 | 41140955 |
| chr6 | 41840892 | 41874239 |
| chr6 | 4189045  | 4190672  |
| chr6 | 42051873 | 42052416 |
| chr6 | 42863332 | 42863757 |
| chr6 | 42934128 | 42934881 |
| chr6 | 42964293 | 42977826 |
| chr6 | 42964532 | 42964780 |
| chr6 | 42977691 | 42977953 |
| chr6 | 42994219 | 42999986 |
| chr6 | 42997794 | 42998637 |
| chr6 | 42998970 | 42999991 |
| chr6 | 42998970 | 43002214 |
| chr6 | 43002451 | 43003099 |
| chr6 | 43028259 | 43029681 |
| chr6 | 43038747 | 43040312 |
| chr6 | 43084424 | 43086557 |
| chr6 | 43194596 | 43194779 |
| chr6 | 43479877 | 43480609 |
| chr6 | 43536663 | 43537093 |
| chr6 | 43588001 | 43588486 |
| chr6 | 43598542 | 43599089 |
| chr6 | 44121861 | 44122192 |
| chr6 | 44406842 | 44407382 |
| chr6 | 52264512 | 52266117 |
| chr6 | 52274452 | 52274591 |
| chr6 | 52274650 | 52275012 |
| chr6 | 52429968 | 52430374 |
| chr6 | 52560166 | 52561392 |
| chr6 | 5263984  | 5264642  |
| chr6 | 52665273 | 52666878 |
| chr6 | 52665273 | 52667493 |
| chr6 | 53285909 | 53286315 |
| chr6 | 53293679 | 53293978 |
| chr6 | 53538677 | 53539357 |
| chr6 | 5475389  | 5475561  |
| chr6 | 56509665 | 56511373 |
| chr6 | 56540590 | 56540782 |
| chr6 | 56833032 | 56834338 |



|      |           |           |
|------|-----------|-----------|
| chr6 | 57050571  | 57050975  |
| chr6 | 63740741  | 63752076  |
| chr6 | 63990764  | 63992171  |
| chr6 | 70435382  | 70435907  |
| chr6 | 72647931  | 72648904  |
| chr6 | 72647931  | 72738372  |
| chr6 | 72807744  | 72808701  |
| chr6 | 72880876  | 72897142  |
| chr6 | 72880876  | 72898206  |
| chr6 | 73223698  | 73225421  |
| chr6 | 73462636  | 73463118  |
| chr6 | 75239068  | 75239888  |
| chr6 | 75272463  | 75272955  |
| chr6 | 75272463  | 75279189  |
| chr6 | 75621926  | 75622858  |
| chr6 | 75695098  | 75695523  |
| chr6 | 80017432  | 80018009  |
| chr6 | 83039872  | 83040189  |
| chr6 | 83194530  | 83195739  |
| chr6 | 85519835  | 85520439  |
| chr6 | 8607007   | 8654784   |
| chr6 | 87240259  | 87240517  |
| chr6 | 87375479  | 87399583  |
| chr6 | 87526439  | 87526780  |
| chr6 | 88861609  | 88862514  |
| chr6 | 89197176  | 89198222  |
| chr6 | 89368055  | 89387396  |
| chr6 | 89765610  | 89766033  |
| chr7 | 100356259 | 100356585 |
| chr7 | 100469149 | 100470401 |
| chr7 | 100469149 | 100470405 |
| chr7 | 100554845 | 100555368 |
| chr7 | 101311275 | 101311725 |
| chr7 | 101930110 | 101930819 |
| chr7 | 102052128 | 102052902 |
| chr7 | 102210345 | 102211185 |
| chr7 | 102813276 | 102968100 |
| chr7 | 103075160 | 103098526 |
| chr7 | 103194976 | 103199965 |
| chr7 | 103194976 | 103200403 |
| chr7 | 103336089 | 103336453 |
| chr7 | 105092970 | 105093124 |
| chr7 | 105334698 | 105340635 |
| chr7 | 105466074 | 105466367 |
| chr7 | 105519475 | 105520264 |

|      |           |           |
|------|-----------|-----------|
| chr7 | 105520491 | 105521419 |
| chr7 | 105864348 | 105864764 |
| chr7 | 11075203  | 11075850  |
| chr7 | 1109327   | 1137404   |
| chr7 | 111453209 | 111453414 |
| chr7 | 122853900 | 122854363 |
| chr7 | 122864563 | 122865625 |
| chr7 | 123582138 | 123635772 |
| chr7 | 127328581 | 127373479 |
| chr7 | 128641202 | 128648986 |
| chr7 | 128669921 | 128683255 |
| chr7 | 129398577 | 129398923 |
| chr7 | 129921621 | 129922093 |
| chr7 | 129939881 | 129941064 |
| chr7 | 130046627 | 130046988 |
| chr7 | 131049537 | 131053465 |
| chr7 | 134295611 | 134310894 |
| chr7 | 135504930 | 135505293 |
| chr7 | 135596188 | 135596636 |
| chr7 | 135646557 | 135647535 |
| chr7 | 138875618 | 138875883 |
| chr7 | 138927560 | 138928030 |
| chr7 | 139740041 | 139742038 |
| chr7 | 139755018 | 139762689 |
| chr7 | 140366407 | 140366874 |
| chr7 | 143395077 | 143396255 |
| chr7 | 143880415 | 143882099 |
| chr7 | 148819736 | 148826198 |
| chr7 | 149217471 | 149222742 |
| chr7 | 149860008 | 149860247 |
| chr7 | 1500395   | 1500891   |
| chr7 | 151091877 | 151092251 |
| chr7 | 151216819 | 151217547 |
| chr7 | 152652489 | 152652750 |
| chr7 | 155307295 | 155308172 |
| chr7 | 155711346 | 155745186 |
| chr7 | 158783449 | 158798036 |
| chr7 | 1715785   | 1716162   |
| chr7 | 17794250  | 17799131  |
| chr7 | 2053383   | 2053538   |
| chr7 | 22240132  | 22240481  |
| chr7 | 2238014   | 2239676   |
| chr7 | 22455179  | 22455879  |
| chr7 | 22474601  | 22495480  |
| chr7 | 22475944  | 22476413  |

|      |          |          |
|------|----------|----------|
| chr7 | 2261433  | 2262069  |
| chr7 | 2284688  | 2284981  |
| chr7 | 2286314  | 2286869  |
| chr7 | 2296911  | 2298773  |
| chr7 | 2309088  | 2309471  |
| chr7 | 23330208 | 23330907 |
| chr7 | 23376722 | 23405110 |
| chr7 | 23394341 | 23396198 |
| chr7 | 23447933 | 23448474 |
| chr7 | 23509726 | 23510355 |
| chr7 | 2360799  | 2363124  |
| chr7 | 2437803  | 2438545  |
| chr7 | 2437803  | 2439330  |
| chr7 | 2437803  | 2443746  |
| chr7 | 2442691  | 2443746  |
| chr7 | 24620154 | 24649713 |
| chr7 | 24748429 | 24749263 |
| chr7 | 26207795 | 26207934 |
| chr7 | 27108085 | 27110300 |
| chr7 | 27526120 | 27541755 |
| chr7 | 27608263 | 27632441 |
| chr7 | 29923955 | 29969013 |
| chr7 | 29983130 | 29983945 |
| chr7 | 32562674 | 32563280 |
| chr7 | 33014534 | 33020519 |
| chr7 | 33146268 | 33183405 |
| chr7 | 3434176  | 3440256  |
| chr7 | 39970274 | 39971620 |
| chr7 | 40079326 | 40080082 |
| chr7 | 42227650 | 42228908 |
| chr7 | 43586271 | 43626586 |
| chr7 | 43780120 | 43780886 |
| chr7 | 43963935 | 43965029 |
| chr7 | 44007187 | 44007557 |
| chr7 | 44413190 | 44414027 |
| chr7 | 44468081 | 44468338 |
| chr7 | 44481291 | 44485622 |
| chr7 | 44615108 | 44615762 |
| chr7 | 44841637 | 44843042 |
| chr7 | 4704253  | 4704760  |
| chr7 | 50695591 | 50710990 |
| chr7 | 5313822  | 5345757  |
| chr7 | 5366627  | 5369083  |
| chr7 | 5389754  | 5390115  |
| chr7 | 5391577  | 5392220  |

|      |          |          |
|------|----------|----------|
| chr7 | 5414195  | 5415888  |
| chr7 | 5480864  | 5485820  |
| chr7 | 5487482  | 5487817  |
| chr7 | 5506651  | 5509128  |
| chr7 | 5506660  | 5510238  |
| chr7 | 55555946 | 55556534 |
| chr7 | 56028067 | 56028250 |
| chr7 | 5604364  | 5605662  |
| chr7 | 5647522  | 5648298  |
| chr7 | 5661372  | 5661531  |
| chr7 | 5674260  | 5674802  |
| chr7 | 5716822  | 5720130  |
| chr7 | 5914343  | 5921046  |
| chr7 | 6343299  | 6344851  |
| chr7 | 6418963  | 6419876  |
| chr7 | 6428268  | 6428596  |
| chr7 | 6428935  | 6429517  |
| chr7 | 6466221  | 6469718  |
| chr7 | 64906004 | 64937630 |
| chr7 | 65002626 | 65004104 |
| chr7 | 65724925 | 65725430 |
| chr7 | 65875821 | 65899620 |
| chr7 | 65891227 | 65899620 |
| chr7 | 65893448 | 65894049 |
| chr7 | 65903442 | 65932789 |
| chr7 | 65916480 | 65916721 |
| chr7 | 65976407 | 65977750 |
| chr7 | 6601934  | 6602973  |
| chr7 | 66210876 | 66211229 |
| chr7 | 66337467 | 66339831 |
| chr7 | 66551519 | 66578727 |
| chr7 | 66551519 | 66580042 |
| chr7 | 66945037 | 66950971 |
| chr7 | 67010267 | 67011596 |
| chr7 | 67023295 | 67023549 |
| chr7 | 67032556 | 67032947 |
| chr7 | 67120313 | 67121299 |
| chr7 | 67314379 | 67315984 |
| chr7 | 67316137 | 67316946 |
| chr7 | 67320264 | 67356102 |
| chr7 | 696551   | 698177   |
| chr7 | 73545516 | 73545868 |
| chr7 | 73553239 | 73553413 |
| chr7 | 73714383 | 73714906 |
| chr7 | 74222336 | 74222619 |

|      |           |           |
|------|-----------|-----------|
| chr7 | 74551843  | 74584896  |
| chr7 | 74552157  | 74553224  |
| chr7 | 74563821  | 74564062  |
| chr7 | 74674094  | 74674345  |
| chr7 | 75472861  | 75473093  |
| chr7 | 75732753  | 75733800  |
| chr7 | 7582629   | 7607136   |
| chr7 | 7640738   | 7788864   |
| chr7 | 76603422  | 76619304  |
| chr7 | 76615493  | 76618390  |
| chr7 | 76617965  | 76618390  |
| chr7 | 76623120  | 76623531  |
| chr7 | 768858    | 785897    |
| chr7 | 78828294  | 78902612  |
| chr7 | 78950545  | 78963455  |
| chr7 | 8040475   | 8041611   |
| chr7 | 80888330  | 80918410  |
| chr7 | 846239    | 846436    |
| chr7 | 846319    | 846644    |
| chr7 | 848417    | 849603    |
| chr7 | 87893508  | 87894173  |
| chr7 | 92249098  | 92249505  |
| chr7 | 93889061  | 93890240  |
| chr7 | 96156839  | 96157550  |
| chr7 | 96275092  | 96309691  |
| chr7 | 98961306  | 98964720  |
| chr7 | 99039115  | 99039455  |
| chr7 | 99047654  | 99048023  |
| chr7 | 99074561  | 99075729  |
| chr7 | 99113580  | 99113835  |
| chr7 | 99375714  | 99377209  |
| chr7 | 99377561  | 99378420  |
| chr7 | 99396599  | 99408573  |
| chr7 | 99462046  | 99462326  |
| chr7 | 99597935  | 99610601  |
| chr8 | 100271098 | 100271851 |
| chr8 | 102400046 | 102402394 |
| chr8 | 103522004 | 103525991 |
| chr8 | 104039269 | 104148848 |
| chr8 | 104068511 | 104148848 |
| chr8 | 104093470 | 104115709 |
| chr8 | 104115531 | 104148848 |
| chr8 | 104148630 | 104233710 |
| chr8 | 105780460 | 105798799 |
| chr8 | 105843127 | 105846409 |

|      |           |           |
|------|-----------|-----------|
| chr8 | 108229028 | 108240098 |
| chr8 | 117440959 | 117614274 |
| chr8 | 118016806 | 118072777 |
| chr8 | 118068161 | 118072777 |
| chr8 | 118070787 | 118072777 |
| chr8 | 118239714 | 118241270 |
| chr8 | 120467597 | 120469068 |
| chr8 | 122851601 | 122873594 |
| chr8 | 122880172 | 122880556 |
| chr8 | 123378624 | 123378898 |
| chr8 | 123378624 | 123378901 |
| chr8 | 123803580 | 123804196 |
| chr8 | 124490432 | 124490892 |
| chr8 | 124492200 | 124492560 |
| chr8 | 124492205 | 124492560 |
| chr8 | 124512347 | 124513024 |
| chr8 | 124516610 | 124517185 |
| chr8 | 124541997 | 124542164 |
| chr8 | 125130212 | 125195272 |
| chr8 | 125139413 | 125195272 |
| chr8 | 125147080 | 125195272 |
| chr8 | 125351390 | 125358573 |
| chr8 | 125359174 | 125359428 |
| chr8 | 127932052 | 128010444 |
| chr8 | 127969415 | 128010444 |
| chr8 | 127982359 | 128010444 |
| chr8 | 127996560 | 128010444 |
| chr8 | 128009567 | 128010444 |
| chr8 | 128009589 | 128010444 |
| chr8 | 128009589 | 128020719 |
| chr8 | 128009589 | 128048609 |
| chr8 | 128009589 | 128070361 |
| chr8 | 128016634 | 128020719 |
| chr8 | 128020315 | 128020719 |
| chr8 | 128020338 | 128022705 |
| chr8 | 128060163 | 128061004 |
| chr8 | 130210089 | 130319668 |
| chr8 | 130288250 | 130290138 |
| chr8 | 13191428  | 13192051  |
| chr8 | 133513899 | 133515882 |
| chr8 | 140176490 | 140185770 |
| chr8 | 140347756 | 140365686 |
| chr8 | 140377393 | 140377895 |
| chr8 | 140429322 | 140429612 |
| chr8 | 140455739 | 140456137 |

|      |           |           |
|------|-----------|-----------|
| chr8 | 140532056 | 140605914 |
| chr8 | 140585090 | 140605914 |
| chr8 | 140605523 | 140605914 |
| chr8 | 140605531 | 140605914 |
| chr8 | 140617537 | 140618050 |
| chr8 | 140672308 | 140674953 |
| chr8 | 140710652 | 140711019 |
| chr8 | 140745922 | 140747000 |
| chr8 | 140864316 | 140890774 |
| chr8 | 140920813 | 140931063 |
| chr8 | 140944983 | 140948723 |
| chr8 | 141174922 | 141176216 |
| chr8 | 143254993 | 143257020 |
| chr8 | 143802643 | 143804456 |
| chr8 | 144196197 | 144196451 |
| chr8 | 144384201 | 144385673 |
| chr8 | 144403996 | 144404618 |
| chr8 | 144654359 | 144655890 |
| chr8 | 144738492 | 144738706 |
| chr8 | 144748168 | 144748309 |
| chr8 | 1564004   | 1638584   |
| chr8 | 22412924  | 22413793  |
| chr8 | 23223363  | 23224059  |
| chr8 | 23288515  | 23289362  |
| chr8 | 23297337  | 23303628  |
| chr8 | 23534201  | 23536950  |
| chr8 | 38340631  | 38341279  |
| chr8 | 41998673  | 42049707  |
| chr8 | 42158526  | 42159072  |
| chr8 | 42324479  | 42325463  |
| chr8 | 42352981  | 42353203  |
| chr8 | 42354424  | 42371662  |
| chr8 | 42508281  | 42508621  |
| chr8 | 42517197  | 42523925  |
| chr8 | 42859628  | 42860454  |
| chr8 | 42926547  | 42928793  |
| chr8 | 42944401  | 42945326  |
| chr8 | 43080277  | 43085396  |
| chr8 | 47482512  | 47491994  |
| chr8 | 47483334  | 47492046  |
| chr8 | 47660345  | 47662962  |
| chr8 | 47729996  | 47730981  |
| chr8 | 48058375  | 48059503  |
| chr8 | 55966054  | 55966426  |
| chr8 | 55986055  | 55986852  |

|      |           |           |
|------|-----------|-----------|
| chr8 | 61661805  | 61684186  |
| chr8 | 6522703   | 6523048   |
| chr8 | 65608831  | 65609212  |
| chr8 | 65609780  | 65611043  |
| chr8 | 65689243  | 65689599  |
| chr8 | 66568538  | 66568843  |
| chr8 | 70295190  | 70360000  |
| chr8 | 71866530  | 71973659  |
| chr8 | 73542901  | 73597488  |
| chr8 | 73947289  | 73947932  |
| chr8 | 73947710  | 73948095  |
| chr8 | 76858015  | 76873493  |
| chr8 | 79909543  | 79958435  |
| chr8 | 79958256  | 79979470  |
| chr8 | 79958256  | 80127629  |
| chr8 | 86369008  | 86467010  |
| chr8 | 86398574  | 86467010  |
| chr8 | 88290710  | 88291177  |
| chr8 | 89714423  | 89728755  |
| chr8 | 94743307  | 94743727  |
| chr8 | 94763224  | 94764301  |
| chr8 | 94763809  | 94764294  |
| chr8 | 94934036  | 94934467  |
| chr8 | 96680442  | 96682076  |
| chr8 | 96863675  | 96902096  |
| chr8 | 97668194  | 97668649  |
| chr8 | 97694810  | 97695233  |
| chr8 | 98663929  | 98722969  |
| chr9 | 100239998 | 100272982 |
| chr9 | 100457757 | 100471231 |
| chr9 | 104750954 | 104759440 |
| chr9 | 105612894 | 105614939 |
| chr9 | 106925968 | 107011037 |
| chr9 | 110762468 | 110784980 |
| chr9 | 110764671 | 110785728 |
| chr9 | 110959492 | 111011690 |
| chr9 | 111005464 | 111011690 |
| chr9 | 111005464 | 111036201 |
| chr9 | 111009147 | 111011690 |
| chr9 | 111472896 | 111473939 |
| chr9 | 111591219 | 111591479 |
| chr9 | 111692375 | 111809084 |
| chr9 | 111911025 | 111911611 |
| chr9 | 113239896 | 113240836 |
| chr9 | 113277090 | 113277715 |



|      |           |           |
|------|-----------|-----------|
| chr9 | 116318603 | 116325747 |
| chr9 | 121917166 | 121928144 |
| chr9 | 124684600 | 124684986 |
| chr9 | 125129409 | 125129980 |
| chr9 | 125205770 | 125206807 |
| chr9 | 125206789 | 125207288 |
| chr9 | 125229340 | 125230059 |
| chr9 | 125514062 | 125514454 |
| chr9 | 125785455 | 125797465 |
| chr9 | 125797394 | 125800988 |
| chr9 | 125797394 | 125818978 |
| chr9 | 126695286 | 126695584 |
| chr9 | 126822720 | 126822919 |
| chr9 | 126863591 | 126864235 |
| chr9 | 126863591 | 126865803 |
| chr9 | 127400435 | 127400778 |
| chr9 | 128228291 | 128228717 |
| chr9 | 128308877 | 128320870 |
| chr9 | 128357425 | 128358460 |
| chr9 | 128464436 | 128465460 |
| chr9 | 128795729 | 128796659 |
| chr9 | 128914992 | 128915276 |
| chr9 | 128951215 | 128951887 |
| chr9 | 128961419 | 128961716 |
| chr9 | 129506176 | 129506420 |
| chr9 | 130059423 | 130059774 |
| chr9 | 130065344 | 130070398 |
| chr9 | 130593297 | 130593887 |
| chr9 | 130842272 | 130884485 |
| chr9 | 131126760 | 131127145 |
| chr9 | 13172658  | 13173464  |
| chr9 | 13265663  | 13276771  |
| chr9 | 132676602 | 132677111 |
| chr9 | 133925842 | 133926327 |
| chr9 | 133925842 | 133927892 |
| chr9 | 133947680 | 133947871 |
| chr9 | 133976429 | 133978130 |
| chr9 | 133976432 | 133978130 |
| chr9 | 134696465 | 134696786 |
| chr9 | 135625331 | 135658151 |
| chr9 | 135933056 | 135940245 |
| chr9 | 136220549 | 136221526 |
| chr9 | 136243020 | 136243353 |
| chr9 | 136680936 | 136681563 |
| chr9 | 136891396 | 136891610 |

|      |           |           |
|------|-----------|-----------|
| chr9 | 136892787 | 136893844 |
| chr9 | 137651702 | 137655093 |
| chr9 | 15435459  | 15435938  |
| chr9 | 15497596  | 15498177  |
| chr9 | 19098944  | 19099276  |
| chr9 | 19353535  | 19354646  |
| chr9 | 21939159  | 22092465  |
| chr9 | 22767174  | 22768403  |
| chr9 | 2690950   | 2783594   |
| chr9 | 2720343   | 2782807   |
| chr9 | 2720343   | 2782846   |
| chr9 | 32414502  | 32415806  |
| chr9 | 33781875  | 33807480  |
| chr9 | 33834807  | 33835241  |
| chr9 | 34280206  | 34281135  |
| chr9 | 35176316  | 35177025  |
| chr9 | 35689603  | 35689831  |
| chr9 | 36254754  | 36256157  |
| chr9 | 36265420  | 36294559  |
| chr9 | 37147361  | 37217122  |
| chr9 | 37160064  | 37165935  |
| chr9 | 37165869  | 37206494  |
| chr9 | 37186711  | 37197879  |
| chr9 | 37345655  | 37346038  |
| chr9 | 37832062  | 37879131  |
| chr9 | 37964899  | 37965766  |
| chr9 | 38015758  | 38025547  |
| chr9 | 38544753  | 38545193  |
| chr9 | 41007439  | 41033022  |
| chr9 | 41007439  | 41037838  |
| chr9 | 4823530   | 4860901   |
| chr9 | 4841204   | 4860901   |
| chr9 | 4841224   | 4860901   |
| chr9 | 4853609   | 4854754   |
| chr9 | 5665677   | 5666072   |
| chr9 | 5765468   | 5776856   |
| chr9 | 5872157   | 5914062   |
| chr9 | 5931543   | 5933881   |
| chr9 | 593608    | 594080    |
| chr9 | 593608    | 611565    |
| chr9 | 6476805   | 6476999   |
| chr9 | 71730738  | 71732475  |
| chr9 | 71862550  | 71906650  |
| chr9 | 71907807  | 71908177  |
| chr9 | 71907820  | 71908130  |

|             |           |           |
|-------------|-----------|-----------|
| chr9        | 77972297  | 77999328  |
| chr9        | 78308862  | 78309457  |
| chr9        | 79675500  | 79676265  |
| chr9        | 83661836  | 83679921  |
| chr9        | 88418777  | 88475513  |
| chr9        | 88418777  | 88482355  |
| chr9        | 88418849  | 88462631  |
| chr9        | 89334638  | 89358853  |
| chr9        | 91251107  | 91251592  |
| chr9        | 91327499  | 91348504  |
| chr9        | 91852320  | 91883383  |
| chr9        | 91852320  | 91886770  |
| chr9        | 91883257  | 91886770  |
| chr9        | 91883257  | 91887113  |
| chr9        | 91883257  | 91913127  |
| chr9        | 93470328  | 93501120  |
| chr9        | 93472195  | 93473073  |
| chr9        | 94424859  | 94425175  |
| chr9        | 95101614  | 95113611  |
| chr9        | 95882273  | 95902088  |
| chr9        | 96895895  | 96942752  |
| chr9        | 96897934  | 96933915  |
| chr9        | 96918642  | 96942752  |
| chr9        | 97658689  | 97672781  |
| chr9        | 97690823  | 97692028  |
| chr9        | 98007633  | 98015517  |
| chr9        | 98115692  | 98115934  |
| chr9        | 98189384  | 98189641  |
| chr9        | 99853203  | 99881985  |
| Un_GL00021: | 74510     | 75077     |
| Un_GL00021: | 90229     | 90629     |
| chrX        | 100914620 | 100949326 |
| chrX        | 101010373 | 101019721 |
| chrX        | 102637995 | 102639533 |
| chrX        | 102825992 | 102839972 |
| chrX        | 102825992 | 102905737 |
| chrX        | 103570567 | 103612987 |
| chrX        | 104136815 | 104137983 |
| chrX        | 108238400 | 108239982 |
| chrX        | 108440005 | 108440504 |
| chrX        | 108607274 | 108607578 |
| chrX        | 109527169 | 109581793 |
| chrX        | 110020351 | 110046484 |
| chrX        | 110046356 | 110173453 |
| chrX        | 115946446 | 115946730 |

|      |           |           |
|------|-----------|-----------|
| chrX | 118422626 | 118423204 |
| chrX | 123265487 | 123268356 |
| chrX | 123304877 | 123313950 |
| chrX | 123863358 | 123871037 |
| chrX | 123973773 | 123974288 |
| chrX | 129921093 | 129929895 |
| chrX | 130007733 | 130007959 |
| chrX | 130010933 | 130011282 |
| chrX | 130042880 | 130043126 |
| chrX | 130071101 | 130071727 |
| chrX | 131743095 | 131785258 |
| chrX | 131777622 | 131785258 |
| chrX | 131792749 | 131793043 |
| chrX | 134783845 | 134784242 |
| chrX | 134807536 | 134833128 |
| chrX | 1352619   | 1356140   |
| chrX | 1365102   | 1368090   |
| chrX | 1378040   | 1378812   |
| chrX | 14710945  | 14797298  |
| chrX | 14843659  | 14864809  |
| chrX | 14843895  | 14864703  |
| chrX | 152320808 | 152457574 |
| chrX | 152320808 | 152458262 |
| chrX | 152562850 | 152639794 |
| chrX | 152635881 | 152639794 |
| chrX | 152635881 | 152641295 |
| chrX | 152639603 | 152641295 |
| chrX | 152834650 | 152835121 |
| chrX | 153701056 | 153701877 |
| chrX | 153722963 | 153723258 |
| chrX | 154011312 | 154016215 |
| chrX | 154069171 | 154069569 |
| chrX | 154089936 | 154090225 |
| chrX | 154352582 | 154352883 |
| chrX | 154354862 | 154357547 |
| chrX | 154510447 | 154510715 |
| chrX | 154532949 | 154534494 |
| chrX | 154768143 | 154768699 |
| chrX | 16607023  | 16607972  |
| chrX | 17432851  | 17477320  |
| chrX | 17473060  | 17477320  |
| chrX | 17477145  | 17512549  |
| chrX | 18933036  | 18935712  |
| chrX | 19368864  | 19369479  |
| chrX | 21855513  | 21855764  |

|      |          |          |
|------|----------|----------|
| chrX | 2238869  | 2240061  |
| chrX | 2345070  | 2345915  |
| chrX | 3692816  | 3693676  |
| chrX | 3819098  | 3819478  |
| chrX | 3822072  | 3826729  |
| chrX | 40715117 | 40726595 |
| chrX | 46625262 | 46625978 |
| chrX | 48003633 | 48003810 |
| chrX | 48986164 | 48986501 |
| chrX | 53097040 | 53097447 |
| chrX | 53406967 | 53408091 |
| chrX | 53534750 | 53535362 |
| chrX | 53550721 | 53551405 |
| chrX | 63722761 | 63743446 |
| chrX | 68081700 | 68154229 |
| chrX | 68517357 | 68517740 |
| chrX | 68517416 | 68517691 |
| chrX | 70350620 | 70351808 |
| chrX | 71291830 | 71294340 |
| chrX | 71292453 | 71293326 |
| chrX | 72272620 | 72273353 |
| chrX | 73563226 | 73681116 |
| chrX | 74128014 | 74161374 |
| chrX | 74285914 | 74290430 |
| chrX | 75379171 | 75446032 |
| chrX | 77603647 | 77605188 |
| chrX | 77705642 | 77706246 |
| chrX | 77868643 | 77869049 |
| chrX | 80753575 | 80754735 |
| chrX | 84318851 | 84351815 |
| chrX | 84321841 | 84351815 |
| chrX | 85211855 | 85243726 |
| chrX | 86174147 | 86206904 |
| chrX | 86174692 | 86175903 |
| chrX | 91414903 | 91418867 |
| chrX | 91414903 | 91453186 |
| chrX | 91414903 | 91570957 |
| chrX | 9484252  | 9484836  |
| chrX | 96707250 | 96707570 |
| chrX | 97348117 | 97353891 |

**ExonIntron (8124)**

|       |           |           |
|-------|-----------|-----------|
| chr10 | 100536410 | 100546636 |
| chr10 | 100540633 | 100550219 |
| chr10 | 100923977 | 100926019 |
| chr10 | 100923977 | 100931078 |

|       |           |           |
|-------|-----------|-----------|
| chr10 | 100923977 | 100938736 |
| chr10 | 101781573 | 101782597 |
| chr10 | 101812247 | 101813606 |
| chr10 | 101956596 | 102014842 |
| chr10 | 102351374 | 102351816 |
| chr10 | 102735861 | 102810054 |
| chr10 | 103111744 | 103174982 |
| chr10 | 103136248 | 103174982 |
| chr10 | 103967709 | 103993133 |
| chr10 | 1056347   | 1072293   |
| chr10 | 1076710   | 1078003   |
| chr10 | 1079555   | 1080476   |
| chr10 | 110295227 | 110304875 |
| chr10 | 1103598   | 1105267   |
| chr10 | 1103598   | 1125024   |
| chr10 | 110502720 | 110510596 |
| chr10 | 110951607 | 110965061 |
| chr10 | 110951607 | 110985765 |
| chr10 | 110964124 | 110967278 |
| chr10 | 112964555 | 113089540 |
| chr10 | 113040024 | 113097471 |
| chr10 | 113086046 | 113089540 |
| chr10 | 113898109 | 113908523 |
| chr10 | 115461974 | 115469329 |
| chr10 | 11594630  | 11597717  |
| chr10 | 11597630  | 11601980  |
| chr10 | 117318871 | 117345449 |
| chr10 | 117340979 | 117345449 |
| chr10 | 11745491  | 11749592  |
| chr10 | 118009081 | 118040565 |
| chr10 | 118685982 | 118695230 |
| chr10 | 118685982 | 118701408 |
| chr10 | 118685982 | 118730410 |
| chr10 | 11921199  | 11952249  |
| chr10 | 119326515 | 119327569 |
| chr10 | 119326515 | 119342254 |
| chr10 | 119576610 | 119593550 |
| chr10 | 119577079 | 119580538 |
| chr10 | 119579934 | 119596960 |
| chr10 | 119581921 | 119591404 |
| chr10 | 119581921 | 119593550 |
| chr10 | 119588151 | 119588704 |
| chr10 | 119588151 | 119594227 |
| chr10 | 12014023  | 12021514  |
| chr10 | 12072756  | 12084751  |

|       |           |           |
|-------|-----------|-----------|
| chr10 | 121790168 | 121926527 |
| chr10 | 121898840 | 121926527 |
| chr10 | 122226339 | 122228008 |
| chr10 | 122389281 | 122406673 |
| chr10 | 122485447 | 122489626 |
| chr10 | 12249580  | 12250469  |
| chr10 | 122880670 | 122888723 |
| chr10 | 122928310 | 122938159 |
| chr10 | 122983271 | 122990407 |
| chr10 | 124760317 | 124765608 |
| chr10 | 124760317 | 124774782 |
| chr10 | 124760317 | 124790338 |
| chr10 | 124767223 | 124790338 |
| chr10 | 124940373 | 124943307 |
| chr10 | 124940373 | 124966781 |
| chr10 | 124942456 | 124943307 |
| chr10 | 124942456 | 124966781 |
| chr10 | 124942456 | 124974398 |
| chr10 | 125038996 | 125040877 |
| chr10 | 125038996 | 125074843 |
| chr10 | 125038996 | 125088319 |
| chr10 | 125038996 | 125122868 |
| chr10 | 125038996 | 125138986 |
| chr10 | 125038996 | 125139869 |
| chr10 | 125074742 | 125111093 |
| chr10 | 125074742 | 125133612 |
| chr10 | 125079906 | 125111093 |
| chr10 | 125088190 | 125111093 |
| chr10 | 125110989 | 125111882 |
| chr10 | 125110989 | 125122868 |
| chr10 | 12529821  | 12553356  |
| chr10 | 125745771 | 125763524 |
| chr10 | 12649653  | 12666810  |
| chr10 | 12662153  | 12666810  |
| chr10 | 126926276 | 126990603 |
| chr10 | 127052680 | 127067137 |
| chr10 | 127409036 | 127451613 |
| chr10 | 127982273 | 127982977 |
| chr10 | 12814194  | 12828051  |
| chr10 | 12814194  | 12828899  |
| chr10 | 130159994 | 130180321 |
| chr10 | 13123994  | 13136897  |
| chr10 | 13127744  | 13136897  |
| chr10 | 13172375  | 13172767  |
| chr10 | 131955683 | 131956211 |

|       |           |           |
|-------|-----------|-----------|
| chr10 | 132244878 | 132245955 |
| chr10 | 132540725 | 132650505 |
| chr10 | 132705192 | 132710456 |
| chr10 | 132940995 | 132942144 |
| chr10 | 13333816  | 13336345  |
| chr10 | 133398434 | 133399653 |
| chr10 | 13480898  | 13526221  |
| chr10 | 14848895  | 14849692  |
| chr10 | 15102217  | 15104553  |
| chr10 | 15128194  | 15128458  |
| chr10 | 15128194  | 15130312  |
| chr10 | 15212471  | 15214601  |
| chr10 | 15248638  | 15309344  |
| chr10 | 15275854  | 15313771  |
| chr10 | 16695022  | 16734064  |
| chr10 | 17390530  | 17405361  |
| chr10 | 17590345  | 17604047  |
| chr10 | 17599273  | 17604047  |
| chr10 | 17660463  | 17673078  |
| chr10 | 17725115  | 17776170  |
| chr10 | 17733834  | 17752552  |
| chr10 | 17733834  | 17776170  |
| chr10 | 17733834  | 17907698  |
| chr10 | 18533036  | 18548237  |
| chr10 | 18585948  | 18622737  |
| chr10 | 18596207  | 18643640  |
| chr10 | 18609844  | 18643640  |
| chr10 | 21571974  | 21595440  |
| chr10 | 21571974  | 21617207  |
| chr10 | 21649261  | 21651768  |
| chr10 | 21668916  | 21673919  |
| chr10 | 21668916  | 21681376  |
| chr10 | 21879743  | 21882439  |
| chr10 | 21879743  | 21920963  |
| chr10 | 245900    | 387809    |
| chr10 | 24851387  | 24864220  |
| chr10 | 26720134  | 26724123  |
| chr10 | 26720217  | 26724127  |
| chr10 | 26742496  | 26743320  |
| chr10 | 27077337  | 27086606  |
| chr10 | 27093348  | 27098326  |
| chr10 | 27111985  | 27116345  |
| chr10 | 27526827  | 27538028  |
| chr10 | 27526827  | 27542875  |
| chr10 | 28583398  | 28584418  |



|       |          |          |
|-------|----------|----------|
| chr10 | 29420490 | 29458520 |
| chr10 | 29457650 | 29458520 |
| chr10 | 30313890 | 30322617 |
| chr10 | 30322390 | 30337031 |
| chr10 | 30941574 | 31017082 |
| chr10 | 31336798 | 31461237 |
| chr10 | 31355143 | 31461237 |
| chr10 | 31373017 | 31461237 |
| chr10 | 31373017 | 31502509 |
| chr10 | 3138363  | 3138903  |
| chr10 | 31839192 | 31839711 |
| chr10 | 32009438 | 32023036 |
| chr10 | 32048463 | 32050523 |
| chr10 | 32451591 | 32456642 |
| chr10 | 32451591 | 32481782 |
| chr10 | 32451591 | 32485144 |
| chr10 | 32469384 | 32474023 |
| chr10 | 32469542 | 32474023 |
| chr10 | 32471063 | 32481782 |
| chr10 | 32471063 | 32584304 |
| chr10 | 32511625 | 32518505 |
| chr10 | 32543299 | 32584304 |
| chr10 | 32543299 | 32595194 |
| chr10 | 32543299 | 32623817 |
| chr10 | 32543299 | 32635158 |
| chr10 | 32565557 | 32584304 |
| chr10 | 32565557 | 32635158 |
| chr10 | 32634253 | 32729457 |
| chr10 | 34243527 | 34269899 |
| chr10 | 34251601 | 34269899 |
| chr10 | 34284134 | 34302429 |
| chr10 | 34450316 | 34493725 |
| chr10 | 34450316 | 34545288 |
| chr10 | 34470084 | 34493363 |
| chr10 | 34516978 | 34545288 |
| chr10 | 34694268 | 34696419 |
| chr10 | 34696317 | 34700204 |
| chr10 | 34696317 | 34728116 |
| chr10 | 34696317 | 34739896 |
| chr10 | 34696317 | 34746781 |
| chr10 | 34696317 | 34800102 |
| chr10 | 35137781 | 35152380 |
| chr10 | 35188199 | 35193155 |
| chr10 | 35374525 | 35501535 |
| chr10 | 35422461 | 35516623 |

|       |          |          |
|-------|----------|----------|
| chr10 | 35434112 | 35516623 |
| chr10 | 35516522 | 35530510 |
| chr10 | 37775343 | 37776575 |
| chr10 | 3779346  | 3782214  |
| chr10 | 37803832 | 37838111 |
| chr10 | 37803832 | 37856337 |
| chr10 | 37803832 | 37856532 |
| chr10 | 37831231 | 37838111 |
| chr10 | 37953694 | 37972021 |
| chr10 | 38159635 | 38177975 |
| chr10 | 38177900 | 38178924 |
| chr10 | 422823   | 522859   |
| chr10 | 42451608 | 42472265 |
| chr10 | 43557031 | 43558171 |
| chr10 | 44885207 | 44923226 |
| chr10 | 45639750 | 45663842 |
| chr10 | 45663541 | 45665513 |
| chr10 | 45862985 | 45964871 |
| chr10 | 45888164 | 45964871 |
| chr10 | 45939360 | 45964871 |
| chr10 | 45939360 | 45965855 |
| chr10 | 46006446 | 46016694 |
| chr10 | 4830674  | 4847660  |
| chr10 | 4830674  | 4860971  |
| chr10 | 4830674  | 4889923  |
| chr10 | 4830674  | 4908420  |
| chr10 | 4830674  | 4909606  |
| chr10 | 48308094 | 48401782 |
| chr10 | 48325896 | 48404981 |
| chr10 | 48325896 | 48410168 |
| chr10 | 48325896 | 48420320 |
| chr10 | 484780   | 486530   |
| chr10 | 49827401 | 49832908 |
| chr10 | 49932099 | 49934163 |
| chr10 | 49945031 | 49973142 |
| chr10 | 49952125 | 49973142 |
| chr10 | 50243201 | 50251511 |
| chr10 | 50340386 | 50344345 |
| chr10 | 50433475 | 50439579 |
| chr10 | 50433475 | 50555499 |
| chr10 | 50584239 | 50590247 |
| chr10 | 5412588  | 5451937  |
| chr10 | 5709529  | 5712918  |
| chr10 | 5709529  | 5717750  |
| chr10 | 5709529  | 5720970  |

|       |          |          |
|-------|----------|----------|
| chr10 | 5783323  | 5800705  |
| chr10 | 5785141  | 5811956  |
| chr10 | 5956378  | 5960755  |
| chr10 | 5959753  | 5960755  |
| chr10 | 59832524 | 59906223 |
| chr10 | 63183267 | 63197563 |
| chr10 | 63264650 | 63414903 |
| chr10 | 63380317 | 63384661 |
| chr10 | 63380317 | 63404965 |
| chr10 | 63380317 | 63409988 |
| chr10 | 63380317 | 63414899 |
| chr10 | 63380317 | 63414903 |
| chr10 | 63380317 | 63429333 |
| chr10 | 63380317 | 63447370 |
| chr10 | 63380317 | 63450105 |
| chr10 | 63380317 | 63455089 |
| chr10 | 63380317 | 63497050 |
| chr10 | 65571424 | 65585802 |
| chr10 | 65571424 | 65670871 |
| chr10 | 65572934 | 65585802 |
| chr10 | 65585664 | 65615761 |
| chr10 | 65585664 | 65689611 |
| chr10 | 65684968 | 65689611 |
| chr10 | 67966682 | 68073004 |
| chr10 | 67988042 | 68014186 |
| chr10 | 67990903 | 68014154 |
| chr10 | 68014025 | 68067217 |
| chr10 | 68025545 | 68044558 |
| chr10 | 68025545 | 68067217 |
| chr10 | 68038092 | 68067217 |
| chr10 | 68109673 | 68122340 |
| chr10 | 6812249  | 6838008  |
| chr10 | 68206769 | 68210547 |
| chr10 | 68206769 | 68215903 |
| chr10 | 68398930 | 68401737 |
| chr10 | 68430435 | 68430660 |
| chr10 | 68437321 | 68470163 |
| chr10 | 68442916 | 68483588 |
| chr10 | 68457480 | 68465812 |
| chr10 | 68458738 | 68470163 |
| chr10 | 68483419 | 68488629 |
| chr10 | 68483419 | 68516843 |
| chr10 | 68493131 | 68517293 |
| chr10 | 68672894 | 68673487 |
| chr10 | 68747160 | 68901471 |

|       |          |          |
|-------|----------|----------|
| chr10 | 68754678 | 68766079 |
| chr10 | 68906225 | 68910382 |
| chr10 | 68906225 | 68913279 |
| chr10 | 68907910 | 68919981 |
| chr10 | 68936935 | 68948168 |
| chr10 | 68955757 | 68967203 |
| chr10 | 68957530 | 68960249 |
| chr10 | 68959946 | 68967203 |
| chr10 | 68963469 | 68965342 |
| chr10 | 68999714 | 69011015 |
| chr10 | 70152262 | 70161069 |
| chr10 | 70152262 | 70161931 |
| chr10 | 70339995 | 70340702 |
| chr10 | 70419913 | 70421966 |
| chr10 | 72097291 | 72102967 |
| chr10 | 72336266 | 72343511 |
| chr10 | 7240302  | 7285954  |
| chr10 | 7243557  | 7283959  |
| chr10 | 7243557  | 7290833  |
| chr10 | 72562894 | 72584263 |
| chr10 | 72708282 | 72715902 |
| chr10 | 72715110 | 72719445 |
| chr10 | 72715110 | 72721282 |
| chr10 | 72715110 | 72736571 |
| chr10 | 72715110 | 72742273 |
| chr10 | 72790175 | 72871580 |
| chr10 | 73072001 | 73074915 |
| chr10 | 73109905 | 73163950 |
| chr10 | 73134602 | 73148404 |
| chr10 | 73141145 | 73146361 |
| chr10 | 73177917 | 73235318 |
| chr10 | 73471069 | 73479992 |
| chr10 | 73541374 | 73576361 |
| chr10 | 73545537 | 73606468 |
| chr10 | 73571420 | 73576361 |
| chr10 | 73575511 | 73576361 |
| chr10 | 7365223  | 7381949  |
| chr10 | 73692042 | 73713332 |
| chr10 | 73704985 | 73724838 |
| chr10 | 73911524 | 73911843 |
| chr10 | 74063685 | 74083513 |
| chr10 | 74242737 | 74314745 |
| chr10 | 74242737 | 74398579 |
| chr10 | 74267564 | 74398579 |
| chr10 | 74340620 | 74398579 |

|       |          |          |
|-------|----------|----------|
| chr10 | 74358443 | 74398579 |
| chr10 | 74380928 | 74398579 |
| chr10 | 74394140 | 74533656 |
| chr10 | 75150513 | 75168693 |
| chr10 | 75168540 | 75182011 |
| chr10 | 76034263 | 76058783 |
| chr10 | 76046878 | 76058783 |
| chr10 | 76324400 | 76346553 |
| chr10 | 76324400 | 76347110 |
| chr10 | 76324400 | 76369315 |
| chr10 | 76557208 | 76561504 |
| chr10 | 77249564 | 77251256 |
| chr10 | 77376009 | 77404023 |
| chr10 | 77403861 | 77418934 |
| chr10 | 77403861 | 77420179 |
| chr10 | 77403861 | 77445879 |
| chr10 | 77403861 | 77447869 |
| chr10 | 77403861 | 77459337 |
| chr10 | 7797053  | 7802854  |
| chr10 | 78035351 | 78040747 |
| chr10 | 79110437 | 79139777 |
| chr10 | 79310923 | 79313987 |
| chr10 | 79691621 | 79692056 |
| chr10 | 80280172 | 80284032 |
| chr10 | 80468546 | 80489314 |
| chr10 | 80492535 | 80507374 |
| chr10 | 80504778 | 80507204 |
| chr10 | 812920   | 817889   |
| chr10 | 836402   | 890829   |
| chr10 | 84380097 | 84438707 |
| chr10 | 84380097 | 84477664 |
| chr10 | 84415391 | 84477664 |
| chr10 | 84417770 | 84456626 |
| chr10 | 84438281 | 84477664 |
| chr10 | 863742   | 903516   |
| chr10 | 86457527 | 86460496 |
| chr10 | 86470991 | 86488504 |
| chr10 | 86470991 | 86490210 |
| chr10 | 87049400 | 87062835 |
| chr10 | 87051582 | 87068157 |
| chr10 | 87051712 | 87068157 |
| chr10 | 87506150 | 87521169 |
| chr10 | 87508335 | 87552541 |
| chr10 | 87864453 | 87933251 |
| chr10 | 87864453 | 87952259 |

|       |          |          |
|-------|----------|----------|
| chr10 | 87864453 | 87958019 |
| chr10 | 87875404 | 87933251 |
| chr10 | 87875404 | 87952259 |
| chr10 | 87878925 | 87933251 |
| chr10 | 87880299 | 87933251 |
| chr10 | 87894024 | 87895777 |
| chr10 | 87922462 | 87933251 |
| chr10 | 88309386 | 88314641 |
| chr10 | 884446   | 889057   |
| chr10 | 884446   | 890829   |
| chr10 | 88893870 | 88905660 |
| chr10 | 89717795 | 89718872 |
| chr10 | 91959217 | 91966757 |
| chr10 | 92081319 | 92243395 |
| chr10 | 92151232 | 92192636 |
| chr10 | 92333469 | 92340803 |
| chr10 | 92508727 | 92559215 |
| chr10 | 92531747 | 92559215 |
| chr10 | 92893329 | 92909631 |
| chr10 | 92948273 | 92961458 |
| chr10 | 92997473 | 93058335 |
| chr10 | 93381266 | 93389154 |
| chr10 | 93452049 | 93460351 |
| chr10 | 94169774 | 94171496 |
| chr10 | 94333389 | 94334305 |
| chr10 | 94350112 | 94350541 |
| chr10 | 94354962 | 94361441 |
| chr10 | 94429758 | 94474783 |
| chr10 | 94441895 | 94444539 |
| chr10 | 94441895 | 94451609 |
| chr10 | 94468874 | 94474783 |
| chr10 | 94474667 | 94477829 |
| chr10 | 94588228 | 94608026 |
| chr10 | 94683268 | 94683987 |
| chr10 | 94733296 | 94775539 |
| chr10 | 95225547 | 95238685 |
| chr10 | 95228337 | 95247366 |
| chr10 | 95876517 | 95904938 |
| chr10 | 96131024 | 96156047 |
| chr10 | 96155325 | 96160402 |
| chr10 | 96544075 | 96567804 |
| chr10 | 96544075 | 96578320 |
| chr10 | 96858291 | 96907747 |
| chr10 | 96884402 | 96944245 |
| chr10 | 96944140 | 96952196 |

|       |           |           |
|-------|-----------|-----------|
| chr10 | 97358643  | 97358942  |
| chr10 | 97388251  | 97388715  |
| chr10 | 97388251  | 97388795  |
| chr10 | 97436416  | 97437750  |
| chr10 | 97436416  | 97438703  |
| chr10 | 97469127  | 97469645  |
| chr10 | 97616230  | 97619683  |
| chr10 | 98208100  | 98244298  |
| chr10 | 99405755  | 99421079  |
| chr10 | 99739709  | 99755778  |
| chr10 | 99750368  | 99756910  |
| chr10 | 99884010  | 99909525  |
| chr10 | 99899918  | 99931445  |
| chr10 | 99969114  | 100006342 |
| chr10 | 99969114  | 99973229  |
| chr10 | 99971979  | 100003023 |
| chr11 | 10188348  | 10193987  |
| chr11 | 101986831 | 101997733 |
| chr11 | 102114143 | 102164693 |
| chr11 | 102174317 | 102209564 |
| chr11 | 102178820 | 102206074 |
| chr11 | 102197857 | 102223752 |
| chr11 | 102350345 | 102368548 |
| chr11 | 102350843 | 102378157 |
| chr11 | 102401915 | 102452721 |
| chr11 | 102950109 | 102955973 |
| chr11 | 10305679  | 10307081  |
| chr11 | 10305948  | 10306615  |
| chr11 | 103062274 | 103066567 |
| chr11 | 103158676 | 103163350 |
| chr11 | 103316544 | 103317004 |
| chr11 | 106009582 | 106011067 |
| chr11 | 106090556 | 106096893 |
| chr11 | 107308282 | 107336713 |
| chr11 | 107308282 | 107349053 |
| chr11 | 107308282 | 107353736 |
| chr11 | 107326005 | 107330019 |
| chr11 | 107326908 | 107336713 |
| chr11 | 107326923 | 107336713 |
| chr11 | 107353523 | 107418284 |
| chr11 | 107410086 | 107418287 |
| chr11 | 108061039 | 108072462 |
| chr11 | 108061039 | 108073497 |
| chr11 | 108127885 | 108131954 |
| chr11 | 108135141 | 108148858 |

|       |           |           |
|-------|-----------|-----------|
| chr11 | 108158919 | 108170043 |
| chr11 | 108197301 | 108204810 |
| chr11 | 108223952 | 108235834 |
| chr11 | 108223952 | 108256340 |
| chr11 | 108227594 | 108236172 |
| chr11 | 108713380 | 108723462 |
| chr11 | 108715878 | 108717615 |
| chr11 | 108715878 | 108768001 |
| chr11 | 108908862 | 108918018 |
| chr11 | 110263331 | 110264874 |
| chr11 | 110435833 | 110442885 |
| chr11 | 111683926 | 111688162 |
| chr11 | 111785788 | 111786520 |
| chr11 | 112230230 | 112230595 |
| chr11 | 113799145 | 113799415 |
| chr11 | 113799145 | 113805046 |
| chr11 | 114443855 | 114450166 |
| chr11 | 11448743  | 11476452  |
| chr11 | 116756227 | 116758407 |
| chr11 | 116949713 | 116957064 |
| chr11 | 117391215 | 117392203 |
| chr11 | 11873799  | 11880380  |
| chr11 | 11873799  | 11922891  |
| chr11 | 119015962 | 119017361 |
| chr11 | 119088254 | 119090335 |
| chr11 | 119126934 | 119128448 |
| chr11 | 119228140 | 119232695 |
| chr11 | 119232447 | 119232729 |
| chr11 | 119255177 | 119271881 |
| chr11 | 119277784 | 119278713 |
| chr11 | 119284968 | 119299587 |
| chr11 | 119296917 | 119299587 |
| chr11 | 119296917 | 119307828 |
| chr11 | 12109700  | 12162419  |
| chr11 | 12153223  | 12162419  |
| chr11 | 122116132 | 122155632 |
| chr11 | 122116132 | 122180398 |
| chr11 | 122155550 | 122202909 |
| chr11 | 122202763 | 122203580 |
| chr11 | 122808176 | 122809716 |
| chr11 | 122946497 | 122959530 |
| chr11 | 123097794 | 123113646 |
| chr11 | 12318059  | 12327266  |
| chr11 | 123480815 | 123577577 |
| chr11 | 124801983 | 124809098 |



|       |           |           |
|-------|-----------|-----------|
| chr11 | 12495060  | 12496598  |
| chr11 | 125629231 | 125656335 |
| chr11 | 125643791 | 125656335 |
| chr11 | 125653745 | 125656335 |
| chr11 | 126203344 | 126205781 |
| chr11 | 126289664 | 126294639 |
| chr11 | 126338285 | 126345499 |
| chr11 | 126380829 | 126409411 |
| chr11 | 129040927 | 129113625 |
| chr11 | 129093620 | 129127305 |
| chr11 | 129123445 | 129127305 |
| chr11 | 129164318 | 129170627 |
| chr11 | 129164318 | 129267361 |
| chr11 | 130260855 | 130288893 |
| chr11 | 134248370 | 134251308 |
| chr11 | 14294470  | 14356769  |
| chr11 | 14457783  | 14458687  |
| chr11 | 14745009  | 14789242  |
| chr11 | 14852673  | 14885917  |
| chr11 | 14867505  | 14869630  |
| chr11 | 16751713  | 16752894  |
| chr11 | 17145667  | 17169806  |
| chr11 | 17168676  | 17169806  |
| chr11 | 17168676  | 17184120  |
| chr11 | 17356650  | 17379665  |
| chr11 | 17873506  | 18008076  |
| chr11 | 17918732  | 18008076  |
| chr11 | 17959469  | 17962291  |
| chr11 | 17959469  | 18010139  |
| chr11 | 17988596  | 18010139  |
| chr11 | 18403811  | 18405376  |
| chr11 | 18480484  | 18484072  |
| chr11 | 19819174  | 19832601  |
| chr11 | 19976746  | 19984247  |
| chr11 | 20364236  | 20383258  |
| chr11 | 20388018  | 20413034  |
| chr11 | 20404877  | 20426865  |
| chr11 | 20407910  | 20435344  |
| chr11 | 24729168  | 24771932  |
| chr11 | 27491426  | 27501920  |
| chr11 | 28211061  | 28212331  |
| chr11 | 2951258   | 2982211   |
| chr11 | 2969802   | 2972279   |
| chr11 | 2969802   | 2989271   |
| chr11 | 30330885  | 30336826  |

|       |          |          |
|-------|----------|----------|
| chr11 | 31452717 | 31463305 |
| chr11 | 31456259 | 31488241 |
| chr11 | 32097147 | 32098528 |
| chr11 | 32388819 | 32400044 |
| chr11 | 32388819 | 32428619 |
| chr11 | 33061529 | 33072653 |
| chr11 | 33141666 | 33161369 |
| chr11 | 33276730 | 33287511 |
| chr11 | 33286412 | 33286952 |
| chr11 | 3362545  | 3369502  |
| chr11 | 34142274 | 34147666 |
| chr11 | 34882675 | 34895110 |
| chr11 | 34957383 | 34998196 |
| chr11 | 3500465  | 3508396  |
| chr11 | 35198071 | 35208206 |
| chr11 | 35200645 | 35204640 |
| chr11 | 35201195 | 35201643 |
| chr11 | 35208104 | 35210181 |
| chr11 | 35663684 | 35726163 |
| chr11 | 36036102 | 36038184 |
| chr11 | 36036102 | 36038224 |
| chr11 | 3705199  | 3710325  |
| chr11 | 3941215  | 4023987  |
| chr11 | 3967551  | 3970235  |
| chr11 | 4132285  | 4138445  |
| chr11 | 43326506 | 43337596 |
| chr11 | 43335857 | 43342687 |
| chr11 | 43372270 | 43389821 |
| chr11 | 43373509 | 43379322 |
| chr11 | 43743293 | 43754121 |
| chr11 | 43750910 | 43760583 |
| chr11 | 45181765 | 45183123 |
| chr11 | 45861462 | 45862148 |
| chr11 | 458860   | 460288   |
| chr11 | 46512564 | 46512813 |
| chr11 | 47161190 | 47161436 |
| chr11 | 47161190 | 47161438 |
| chr11 | 47216335 | 47238955 |
| chr11 | 47422573 | 47422989 |
| chr11 | 47615962 | 47625741 |
| chr11 | 47747505 | 47765362 |
| chr11 | 47806152 | 47808793 |
| chr11 | 497970   | 505001   |
| chr11 | 562776   | 563165   |
| chr11 | 5645684  | 5678434  |

|       |          |          |
|-------|----------|----------|
| chr11 | 57696760 | 57700397 |
| chr11 | 57698558 | 57700397 |
| chr11 | 57704301 | 57704815 |
| chr11 | 59658038 | 59659469 |
| chr11 | 601573   | 603436   |
| chr11 | 61132353 | 61138835 |
| chr11 | 61132419 | 61138835 |
| chr11 | 61322295 | 61333008 |
| chr11 | 61366117 | 61367998 |
| chr11 | 61411768 | 61416189 |
| chr11 | 61436760 | 61438113 |
| chr11 | 61437624 | 61438080 |
| chr11 | 61437624 | 61438120 |
| chr11 | 61437624 | 61438362 |
| chr11 | 61437624 | 61446113 |
| chr11 | 61437624 | 61446231 |
| chr11 | 61795340 | 61798153 |
| chr11 | 61879532 | 61880040 |
| chr11 | 62381796 | 62391632 |
| chr11 | 62533660 | 62536567 |
| chr11 | 62632972 | 62639731 |
| chr11 | 62735381 | 62738490 |
| chr11 | 62839113 | 62839706 |
| chr11 | 62839113 | 62839867 |
| chr11 | 64320660 | 64321874 |
| chr11 | 64802683 | 64802884 |
| chr11 | 65032203 | 65032409 |
| chr11 | 65546941 | 65547438 |
| chr11 | 65551125 | 65552083 |
| chr11 | 65862529 | 65862976 |
| chr11 | 65863901 | 65864463 |
| chr11 | 65870290 | 65870535 |
| chr11 | 65894013 | 65894497 |
| chr11 | 65894013 | 65897111 |
| chr11 | 65998441 | 65999675 |
| chr11 | 66000052 | 66001143 |
| chr11 | 66003234 | 66003753 |
| chr11 | 6610905  | 6611818  |
| chr11 | 66269562 | 66275935 |
| chr11 | 66365300 | 66367548 |
| chr11 | 66365381 | 66366564 |
| chr11 | 66435972 | 66438259 |
| chr11 | 66639677 | 66640123 |
| chr11 | 66646026 | 66657259 |
| chr11 | 66756352 | 66762450 |

|       |          |          |
|-------|----------|----------|
| chr11 | 66759042 | 66762450 |
| chr11 | 66813845 | 66828364 |
| chr11 | 66815015 | 66822674 |
| chr11 | 66828265 | 66828943 |
| chr11 | 66844364 | 66844842 |
| chr11 | 67304048 | 67310339 |
| chr11 | 67490457 | 67490768 |
| chr11 | 67608399 | 67609635 |
| chr11 | 68261751 | 68262730 |
| chr11 | 68347846 | 68365698 |
| chr11 | 68357649 | 68365698 |
| chr11 | 68515027 | 68519651 |
| chr11 | 68515027 | 68537891 |
| chr11 | 68533793 | 68537891 |
| chr11 | 68775119 | 68775432 |
| chr11 | 6932093  | 6955782  |
| chr11 | 6932093  | 6988315  |
| chr11 | 6932093  | 6988320  |
| chr11 | 6941570  | 6955782  |
| chr11 | 69666189 | 69671819 |
| chr11 | 70337364 | 70339311 |
| chr11 | 70349922 | 70356254 |
| chr11 | 70402838 | 70405361 |
| chr11 | 70429050 | 70433142 |
| chr11 | 71215342 | 71224796 |
| chr11 | 71916073 | 71926510 |
| chr11 | 71935304 | 71987111 |
| chr11 | 71954621 | 71960891 |
| chr11 | 71982760 | 71983770 |
| chr11 | 71982806 | 71990717 |
| chr11 | 71999926 | 72019009 |
| chr11 | 72231189 | 72231474 |
| chr11 | 72354307 | 72359008 |
| chr11 | 72402965 | 72410372 |
| chr11 | 72758656 | 72759233 |
| chr11 | 73409486 | 73418470 |
| chr11 | 73419873 | 73582899 |
| chr11 | 73676706 | 73679720 |
| chr11 | 73677720 | 73679720 |
| chr11 | 73706388 | 73716362 |
| chr11 | 73707419 | 73716345 |
| chr11 | 73716250 | 73718885 |
| chr11 | 73716726 | 73718718 |
| chr11 | 73787901 | 73825796 |
| chr11 | 73825707 | 73864433 |

|       |          |          |
|-------|----------|----------|
| chr11 | 73843246 | 73844976 |
| chr11 | 74012577 | 74123135 |
| chr11 | 74085521 | 74085886 |
| chr11 | 74132843 | 74165062 |
| chr11 | 7461238  | 7469766  |
| chr11 | 74625407 | 74640841 |
| chr11 | 74629216 | 74640841 |
| chr11 | 74634582 | 74640841 |
| chr11 | 74775145 | 74817714 |
| chr11 | 74784432 | 74789699 |
| chr11 | 74784432 | 74810330 |
| chr11 | 74963594 | 74969699 |
| chr11 | 752263   | 756002   |
| chr11 | 75477618 | 75479488 |
| chr11 | 75566971 | 75568704 |
| chr11 | 75979777 | 75983513 |
| chr11 | 76463801 | 76472840 |
| chr11 | 76544258 | 76549017 |
| chr11 | 7665323  | 7672891  |
| chr11 | 76888497 | 76926667 |
| chr11 | 77616205 | 77629899 |
| chr11 | 77624941 | 77625818 |
| chr11 | 77722054 | 77725699 |
| chr11 | 77724347 | 77725699 |
| chr11 | 77841018 | 77842628 |
| chr11 | 77918875 | 77941251 |
| chr11 | 77938650 | 77991293 |
| chr11 | 78069891 | 78073141 |
| chr11 | 78101092 | 78109581 |
| chr11 | 78436694 | 78443758 |
| chr11 | 78436694 | 78493195 |
| chr11 | 78489912 | 78493195 |
| chr11 | 78536825 | 78571444 |
| chr11 | 82901007 | 82901822 |
| chr11 | 82913286 | 82931849 |
| chr11 | 82914722 | 82931849 |
| chr11 | 83073302 | 83081800 |
| chr11 | 836062   | 838367   |
| chr11 | 85046477 | 85154651 |
| chr11 | 85280533 | 85285365 |
| chr11 | 85974707 | 86042885 |
| chr11 | 86031468 | 86042885 |
| chr11 | 8621343  | 8621644  |
| chr11 | 86249470 | 86252240 |
| chr11 | 86249470 | 86257596 |

|       |           |           |
|-------|-----------|-----------|
| chr11 | 86256427  | 86266216  |
| chr11 | 8638653   | 8654578   |
| chr11 | 8682816   | 8683179   |
| chr11 | 87067693  | 87075786  |
| chr11 | 87067693  | 87158771  |
| chr11 | 87157340  | 87158771  |
| chr11 | 8750620   | 8871088   |
| chr11 | 8796720   | 8811335   |
| chr11 | 8802829   | 8811335   |
| chr11 | 88309162  | 88337683  |
| chr11 | 88334936  | 88337683  |
| chr11 | 8912452   | 8919520   |
| chr11 | 8912452   | 8922115   |
| chr11 | 899425    | 900003    |
| chr11 | 9283370   | 9299629   |
| chr11 | 9287701   | 9300116   |
| chr11 | 93162705  | 93170221  |
| chr11 | 93673977  | 93679552  |
| chr11 | 93683558  | 93695673  |
| chr11 | 93736140  | 93736751  |
| chr11 | 93747296  | 93761725  |
| chr11 | 93788000  | 93814611  |
| chr11 | 9414235   | 9420698   |
| chr11 | 9423140   | 9423743   |
| chr11 | 9437728   | 9442197   |
| chr11 | 94485927  | 94490965  |
| chr11 | 94607555  | 94608686  |
| chr11 | 94869197  | 94871030  |
| chr11 | 9575887   | 9588537   |
| chr11 | 95799231  | 95832805  |
| chr11 | 95827785  | 95832805  |
| chr11 | 96091891  | 96093135  |
| chr11 | 9779462   | 9785318   |
| chr11 | 9961956   | 10006856  |
| chr11 | 9961956   | 10020284  |
| chr12 | 100095666 | 100128725 |
| chr12 | 100591697 | 100622382 |
| chr12 | 101768036 | 101770507 |
| chr12 | 102039867 | 102050291 |
| chr12 | 102074368 | 102077503 |
| chr12 | 102145976 | 102148463 |
| chr12 | 102148229 | 102150371 |
| chr12 | 102164437 | 102196087 |
| chr12 | 10307977  | 10315473  |
| chr12 | 104309758 | 104327671 |

|       |           |           |
|-------|-----------|-----------|
| chr12 | 104348352 | 104387984 |
| chr12 | 104565119 | 104601991 |
| chr12 | 104844471 | 104915088 |
| chr12 | 104886292 | 104900301 |
| chr12 | 104895273 | 104915088 |
| chr12 | 104909654 | 104931791 |
| chr12 | 104991711 | 104994723 |
| chr12 | 104991711 | 104996026 |
| chr12 | 104994477 | 104996026 |
| chr12 | 105174095 | 105197953 |
| chr12 | 105229124 | 105233216 |
| chr12 | 106842588 | 106870942 |
| chr12 | 10709907  | 10710788  |
| chr12 | 10712929  | 10713333  |
| chr12 | 10831067  | 10848407  |
| chr12 | 108652271 | 108657699 |
| chr12 | 108701123 | 108717762 |
| chr12 | 108701123 | 108718954 |
| chr12 | 108701123 | 108729170 |
| chr12 | 108817037 | 108818558 |
| chr12 | 108818248 | 108818558 |
| chr12 | 108849034 | 108852678 |
| chr12 | 109451590 | 109460805 |
| chr12 | 10973654  | 10993219  |
| chr12 | 10973654  | 11121180  |
| chr12 | 110011990 | 110013249 |
| chr12 | 110180421 | 110218187 |
| chr12 | 11028400  | 11047188  |
| chr12 | 11034781  | 11059410  |
| chr12 | 11047019  | 11121180  |
| chr12 | 11047019  | 11124187  |
| chr12 | 11047019  | 11129363  |
| chr12 | 11047019  | 11133367  |
| chr12 | 11047019  | 11147135  |
| chr12 | 110473077 | 110486700 |
| chr12 | 110473077 | 110490171 |
| chr12 | 1104749   | 1168046   |
| chr12 | 110485077 | 110490171 |
| chr12 | 110536923 | 110546078 |
| chr12 | 110536923 | 110551968 |
| chr12 | 110730528 | 110736035 |
| chr12 | 111418118 | 111420488 |
| chr12 | 111485264 | 111513539 |
| chr12 | 111522694 | 111525316 |
| chr12 | 111552279 | 111565419 |

|       |           |           |
|-------|-----------|-----------|
| chr12 | 111552279 | 111571182 |
| chr12 | 111692696 | 111749103 |
| chr12 | 112039228 | 112049611 |
| chr12 | 112047664 | 112049611 |
| chr12 | 112250143 | 112252528 |
| chr12 | 112256319 | 112259174 |
| chr12 | 112445582 | 112456063 |
| chr12 | 112446275 | 112456898 |
| chr12 | 112446275 | 112457379 |
| chr12 | 113304399 | 113306494 |
| chr12 | 115996475 | 115997227 |
| chr12 | 116066801 | 116111512 |
| chr12 | 116096668 | 116237542 |
| chr12 | 116180035 | 116237705 |
| chr12 | 116205052 | 116237705 |
| chr12 | 116227809 | 116237705 |
| chr12 | 116230432 | 116237705 |
| chr12 | 116230532 | 116237705 |
| chr12 | 116236820 | 116237705 |
| chr12 | 116237156 | 116237705 |
| chr12 | 116237467 | 116240462 |
| chr12 | 116237467 | 116246305 |
| chr12 | 116918530 | 116949706 |
| chr12 | 117039029 | 117046838 |
| chr12 | 11732362  | 11752579  |
| chr12 | 11738626  | 11752579  |
| chr12 | 11750526  | 11752579  |
| chr12 | 11750953  | 11752579  |
| chr12 | 118024850 | 118032618 |
| chr12 | 118033646 | 118035324 |
| chr12 | 1183280   | 1255946   |
| chr12 | 118400658 | 118414470 |
| chr12 | 118403411 | 118414470 |
| chr12 | 11884444  | 11891569  |
| chr12 | 119690150 | 119690451 |
| chr12 | 120200909 | 120201082 |
| chr12 | 120539367 | 120546601 |
| chr12 | 120557339 | 120557682 |
| chr12 | 120713273 | 120727189 |
| chr12 | 121232413 | 121233740 |
| chr12 | 121296637 | 121494665 |
| chr12 | 121420241 | 121423517 |
| chr12 | 121452392 | 121453344 |
| chr12 | 121453119 | 121455536 |
| chr12 | 121548876 | 121581134 |



|       |           |           |
|-------|-----------|-----------|
| chr12 | 121934044 | 121934356 |
| chr12 | 122035330 | 122035740 |
| chr12 | 122054804 | 122055408 |
| chr12 | 122129629 | 122129915 |
| chr12 | 122152892 | 122186300 |
| chr12 | 122232325 | 122232968 |
| chr12 | 12244261  | 12259895  |
| chr12 | 122483459 | 122498863 |
| chr12 | 122522142 | 122522906 |
| chr12 | 122530021 | 122539754 |
| chr12 | 122530021 | 122542127 |
| chr12 | 122530021 | 122543634 |
| chr12 | 122568321 | 122577029 |
| chr12 | 122579904 | 122582848 |
| chr12 | 122805369 | 122806295 |
| chr12 | 122868479 | 122871396 |
| chr12 | 122935271 | 122946220 |
| chr12 | 123110384 | 123141399 |
| chr12 | 123334052 | 123357852 |
| chr12 | 123498543 | 123518494 |
| chr12 | 123603847 | 123606159 |
| chr12 | 12361205  | 12367409  |
| chr12 | 123647962 | 123651156 |
| chr12 | 123673617 | 123677081 |
| chr12 | 123688779 | 123697198 |
| chr12 | 123751109 | 123758163 |
| chr12 | 124347936 | 124348173 |
| chr12 | 124362125 | 124476764 |
| chr12 | 12616160  | 12637714  |
| chr12 | 12635776  | 12644428  |
| chr12 | 1282798   | 1290012   |
| chr12 | 128814774 | 128815652 |
| chr12 | 1289851   | 1319288   |
| chr12 | 1289851   | 1326260   |
| chr12 | 130785809 | 130801488 |
| chr12 | 130791673 | 130808704 |
| chr12 | 130808602 | 130827267 |
| chr12 | 130827192 | 130827481 |
| chr12 | 130872835 | 130875997 |
| chr12 | 131932174 | 131944015 |
| chr12 | 132086374 | 132090943 |
| chr12 | 13211468  | 13214673  |
| chr12 | 132507251 | 132508350 |
| chr12 | 132507251 | 132525823 |
| chr12 | 132720677 | 132721217 |

|       |           |           |
|-------|-----------|-----------|
| chr12 | 132734384 | 132737305 |
| chr12 | 132747831 | 132748257 |
| chr12 | 132774342 | 132775140 |
| chr12 | 132816659 | 132822311 |
| chr12 | 133038874 | 133048848 |
| chr12 | 1371832   | 1412538   |
| chr12 | 14794970  | 14796950  |
| chr12 | 15217428  | 15223901  |
| chr12 | 15217428  | 15229533  |
| chr12 | 15217428  | 15337470  |
| chr12 | 15955896  | 15982436  |
| chr12 | 1616795   | 1617143   |
| chr12 | 1631297   | 1646297   |
| chr12 | 16354230  | 16383604  |
| chr12 | 1690038   | 1772961   |
| chr12 | 1702885   | 1754514   |
| chr12 | 1702885   | 1772961   |
| chr12 | 1744521   | 1754514   |
| chr12 | 1754257   | 1757459   |
| chr12 | 19443118  | 19473355  |
| chr12 | 19462509  | 19466850  |
| chr12 | 19462509  | 19484053  |
| chr12 | 19462509  | 19518841  |
| chr12 | 19466747  | 19500221  |
| chr12 | 19471715  | 19500221  |
| chr12 | 21304426  | 21334704  |
| chr12 | 21506884  | 21515931  |
| chr12 | 21512294  | 21515931  |
| chr12 | 22642416  | 22644022  |
| chr12 | 22642416  | 22661205  |
| chr12 | 22659013  | 22685186  |
| chr12 | 25209798  | 25227412  |
| chr12 | 25213113  | 25227412  |
| chr12 | 25995036  | 25999113  |
| chr12 | 26041973  | 26055446  |
| chr12 | 26769348  | 26790227  |
| chr12 | 26922615  | 26930342  |
| chr12 | 27368261  | 27371447  |
| chr12 | 27368261  | 27376416  |
| chr12 | 27368261  | 27376428  |
| chr12 | 27368261  | 27377564  |
| chr12 | 27368261  | 27426317  |
| chr12 | 27368261  | 27524365  |
| chr12 | 27426131  | 27474913  |
| chr12 | 27426131  | 27475731  |

|       |          |          |
|-------|----------|----------|
| chr12 | 2797728  | 2804363  |
| chr12 | 28197122 | 28391411 |
| chr12 | 28198942 | 28307749 |
| chr12 | 28225794 | 28259442 |
| chr12 | 28225794 | 28307749 |
| chr12 | 28225794 | 28391411 |
| chr12 | 2822793  | 2826793  |
| chr12 | 2822793  | 2830885  |
| chr12 | 28235569 | 28391411 |
| chr12 | 28255580 | 28259442 |
| chr12 | 28255580 | 28307749 |
| chr12 | 28255580 | 28391411 |
| chr12 | 28296855 | 28307749 |
| chr12 | 28303191 | 28307749 |
| chr12 | 28304625 | 28307749 |
| chr12 | 28304625 | 28391411 |
| chr12 | 28305648 | 28328191 |
| chr12 | 2830833  | 2840995  |
| chr12 | 2866392  | 2877145  |
| chr12 | 30741019 | 30753609 |
| chr12 | 31281860 | 31298224 |
| chr12 | 31282715 | 31298224 |
| chr12 | 31396318 | 31398362 |
| chr12 | 31495809 | 31541031 |
| chr12 | 31495809 | 31542949 |
| chr12 | 31495809 | 31571180 |
| chr12 | 3201176  | 3206418  |
| chr12 | 32107275 | 32306122 |
| chr12 | 32305663 | 32306122 |
| chr12 | 32559618 | 32701562 |
| chr12 | 32698220 | 32701562 |
| chr12 | 32706689 | 32740240 |
| chr12 | 32742588 | 32743508 |
| chr12 | 32745679 | 32747363 |
| chr12 | 32747075 | 32750874 |
| chr12 | 362962   | 376724   |
| chr12 | 38670728 | 38679714 |
| chr12 | 39822628 | 39830228 |
| chr12 | 39822628 | 39871961 |
| chr12 | 39951256 | 39991421 |
| chr12 | 40028300 | 40085700 |
| chr12 | 40028300 | 40092933 |
| chr12 | 40028300 | 40100089 |
| chr12 | 42199135 | 42210680 |
| chr12 | 42210354 | 42210619 |

|       |          |          |
|-------|----------|----------|
| chr12 | 42373392 | 42398994 |
| chr12 | 42374637 | 42375074 |
| chr12 | 42374637 | 42398994 |
| chr12 | 45176240 | 45190961 |
| chr12 | 45293271 | 45357424 |
| chr12 | 45860800 | 45872962 |
| chr12 | 45891248 | 45893721 |
| chr12 | 45922462 | 45926291 |
| chr12 | 46229152 | 46256769 |
| chr12 | 46239678 | 46256769 |
| chr12 | 47104112 | 47108164 |
| chr12 | 47212596 | 47216689 |
| chr12 | 48142781 | 48145746 |
| chr12 | 48151200 | 48153525 |
| chr12 | 48659904 | 48660619 |
| chr12 | 48662559 | 48679833 |
| chr12 | 48712261 | 48714524 |
| chr12 | 48923781 | 48926011 |
| chr12 | 48923867 | 48924222 |
| chr12 | 48936151 | 48941188 |
| chr12 | 48939034 | 48941188 |
| chr12 | 49097565 | 49098105 |
| chr12 | 49097565 | 49100454 |
| chr12 | 49460997 | 49497009 |
| chr12 | 49483735 | 49500205 |
| chr12 | 49486249 | 49490731 |
| chr12 | 49524681 | 49527713 |
| chr12 | 49749617 | 49759321 |
| chr12 | 50427744 | 50441643 |
| chr12 | 50770028 | 50796009 |
| chr12 | 50775581 | 50796009 |
| chr12 | 51056349 | 51063553 |
| chr12 | 51683741 | 51688849 |
| chr12 | 51684173 | 51689096 |
| chr12 | 51769335 | 51769864 |
| chr12 | 51980988 | 51986942 |
| chr12 | 52171133 | 52185587 |
| chr12 | 53024841 | 53027919 |
| chr12 | 53065992 | 53066313 |
| chr12 | 53227361 | 53232192 |
| chr12 | 53454749 | 53471807 |
| chr12 | 53455884 | 53456747 |
| chr12 | 54053159 | 54055198 |
| chr12 | 54241743 | 54257692 |
| chr12 | 54391234 | 54391940 |

|       |          |          |
|-------|----------|----------|
| chr12 | 55967856 | 55971712 |
| chr12 | 56019317 | 56023764 |
| chr12 | 56106587 | 56112889 |
| chr12 | 56159586 | 56162331 |
| chr12 | 56224833 | 56229675 |
| chr12 | 56248892 | 56252014 |
| chr12 | 56254374 | 56254577 |
| chr12 | 56285915 | 56298691 |
| chr12 | 56731095 | 56734245 |
| chr12 | 57256097 | 57256413 |
| chr12 | 57292571 | 57295507 |
| chr12 | 57783283 | 57783586 |
| chr12 | 62549667 | 62560657 |
| chr12 | 62720170 | 62879233 |
| chr12 | 63844795 | 64042972 |
| chr12 | 63983946 | 63997128 |
| chr12 | 64051919 | 64065219 |
| chr12 | 64752697 | 64756762 |
| chr12 | 6492201  | 6492972  |
| chr12 | 6494115  | 6522037  |
| chr12 | 6521857  | 6523002  |
| chr12 | 65238501 | 65246505 |
| chr12 | 65326825 | 65454663 |
| chr12 | 6556949  | 6557642  |
| chr12 | 65828000 | 65881890 |
| chr12 | 6602177  | 6602375  |
| chr12 | 66145840 | 66161172 |
| chr12 | 66305031 | 66306514 |
| chr12 | 6655637  | 6656798  |
| chr12 | 6724613  | 6731210  |
| chr12 | 68321346 | 68325247 |
| chr12 | 6837086  | 6837372  |
| chr12 | 6837086  | 6837399  |
| chr12 | 6837086  | 6837401  |
| chr12 | 68686996 | 68692112 |
| chr12 | 68690602 | 68715740 |
| chr12 | 68748075 | 68752190 |
| chr12 | 68757147 | 68759239 |
| chr12 | 69251128 | 69269668 |
| chr12 | 69252988 | 69262562 |
| chr12 | 69258034 | 69269668 |
| chr12 | 69258940 | 69262562 |
| chr12 | 69258998 | 69262562 |
| chr12 | 6934578  | 6935408  |
| chr12 | 69597275 | 69597616 |

|       |          |          |
|-------|----------|----------|
| chr12 | 70278131 | 70285586 |
| chr12 | 71618331 | 71620315 |
| chr12 | 72286314 | 72286954 |
| chr12 | 72370763 | 72499635 |
| chr12 | 7316960  | 7433694  |
| chr12 | 7326897  | 7374756  |
| chr12 | 7347027  | 7357486  |
| chr12 | 7368057  | 7374756  |
| chr12 | 7379236  | 7433694  |
| chr12 | 7403534  | 7436602  |
| chr12 | 7428811  | 7433694  |
| chr12 | 76063108 | 76068994 |
| chr12 | 76821057 | 76822531 |
| chr12 | 76841962 | 76846679 |
| chr12 | 76842024 | 76846679 |
| chr12 | 76842024 | 76849470 |
| chr12 | 794268   | 830160   |
| chr12 | 79574865 | 79596658 |
| chr12 | 79574865 | 79621207 |
| chr12 | 79592610 | 79596658 |
| chr12 | 79592610 | 79621207 |
| chr12 | 79593902 | 79594433 |
| chr12 | 79612492 | 79621207 |
| chr12 | 79613574 | 79666631 |
| chr12 | 81676790 | 81711865 |
| chr12 | 820496   | 827262   |
| chr12 | 82369386 | 82403130 |
| chr12 | 82369386 | 82456820 |
| chr12 | 82896541 | 82930545 |
| chr12 | 84883854 | 84892308 |
| chr12 | 86838665 | 86838880 |
| chr12 | 871264   | 873178   |
| chr12 | 88049291 | 88055717 |
| chr12 | 89420279 | 89425379 |
| chr12 | 89448912 | 89472275 |
| chr12 | 89642157 | 89677816 |
| chr12 | 89655678 | 89656107 |
| chr12 | 89655678 | 89663091 |
| chr12 | 8971077  | 8995288  |
| chr12 | 91986561 | 91993529 |
| chr12 | 93409908 | 93411299 |
| chr12 | 93565612 | 93567159 |
| chr12 | 94308782 | 94331829 |
| chr12 | 94366713 | 94376017 |
| chr12 | 95476073 | 95496098 |

|       |           |           |
|-------|-----------|-----------|
| chr12 | 9606352   | 9617351   |
| chr12 | 96194539  | 96259853  |
| chr12 | 96198025  | 96223773  |
| chr12 | 96223564  | 96225261  |
| chr12 | 96223564  | 96247283  |
| chr12 | 96311051  | 96395917  |
| chr12 | 9680922   | 9694969   |
| chr12 | 96934975  | 96952162  |
| chr12 | 98537474  | 98547671  |
| chr12 | 98544229  | 98547671  |
| chr12 | 98595432  | 98595661  |
| chr12 | 99375390  | 99399811  |
| chr12 | 99386261  | 99399811  |
| chr12 | 99709902  | 99782097  |
| chr12 | 99709902  | 99806700  |
| chr12 | 99744404  | 99779972  |
| chr12 | 99759333  | 99806700  |
| chr12 | 99774602  | 99825389  |
| chr12 | 998323    | 1028572   |
| chr13 | 100386768 | 100425731 |
| chr13 | 100515426 | 100539370 |
| chr13 | 101688637 | 101692701 |
| chr13 | 102807557 | 102822159 |
| chr13 | 102807611 | 102822159 |
| chr13 | 108303252 | 108335572 |
| chr13 | 110520749 | 110524197 |
| chr13 | 110627438 | 110638492 |
| chr13 | 111280350 | 111280505 |
| chr13 | 113013264 | 113024758 |
| chr13 | 113302211 | 113309862 |
| chr13 | 113835512 | 113838096 |
| chr13 | 114040999 | 114057441 |
| chr13 | 114040999 | 114057474 |
| chr13 | 114052051 | 114057441 |
| chr13 | 114052051 | 114057474 |
| chr13 | 19751270  | 19752316  |
| chr13 | 20615792  | 20641510  |
| chr13 | 20728279  | 20757617  |
| chr13 | 20821703  | 20856002  |
| chr13 | 20842894  | 20868697  |
| chr13 | 20855626  | 20863123  |
| chr13 | 21045684  | 21046446  |
| chr13 | 23360313  | 23365277  |
| chr13 | 23798723  | 23809924  |
| chr13 | 23798723  | 23837756  |

|       |          |          |
|-------|----------|----------|
| chr13 | 23798723 | 23841488 |
| chr13 | 23798723 | 23870195 |
| chr13 | 23798723 | 23886506 |
| chr13 | 23836239 | 23841407 |
| chr13 | 24211274 | 24224582 |
| chr13 | 24245775 | 24251862 |
| chr13 | 24249476 | 24253220 |
| chr13 | 24249476 | 24255219 |
| chr13 | 24249476 | 24257409 |
| chr13 | 24300400 | 24304846 |
| chr13 | 24474531 | 24478276 |
| chr13 | 24475620 | 24477700 |
| chr13 | 24482146 | 24493733 |
| chr13 | 24484652 | 24488284 |
| chr13 | 26262549 | 26353880 |
| chr13 | 26299566 | 26337642 |
| chr13 | 26299566 | 26353880 |
| chr13 | 26324771 | 26353880 |
| chr13 | 26573714 | 26613058 |
| chr13 | 26577354 | 26642403 |
| chr13 | 26593607 | 26613058 |
| chr13 | 26593607 | 26642403 |
| chr13 | 27069089 | 27075388 |
| chr13 | 27069089 | 27090158 |
| chr13 | 27069110 | 27075388 |
| chr13 | 27069110 | 27090158 |
| chr13 | 27578718 | 27581803 |
| chr13 | 28239578 | 28261458 |
| chr13 | 28266717 | 28272071 |
| chr13 | 28701500 | 28713075 |
| chr13 | 29024456 | 29034125 |
| chr13 | 29222511 | 29359473 |
| chr13 | 29242296 | 29281865 |
| chr13 | 29277319 | 29281865 |
| chr13 | 29445578 | 29536202 |
| chr13 | 29453067 | 29485306 |
| chr13 | 29453067 | 29536202 |
| chr13 | 29484868 | 29492665 |
| chr13 | 29497237 | 29503492 |
| chr13 | 29514352 | 29524253 |
| chr13 | 29514352 | 29536202 |
| chr13 | 29514352 | 29553860 |
| chr13 | 29517015 | 29530712 |
| chr13 | 29517015 | 29532982 |
| chr13 | 29517143 | 29527365 |



|       |          |          |
|-------|----------|----------|
| chr13 | 29517330 | 29517572 |
| chr13 | 29522316 | 29536485 |
| chr13 | 29523506 | 29524131 |
| chr13 | 29523531 | 29524131 |
| chr13 | 29530537 | 29540603 |
| chr13 | 29530624 | 29532982 |
| chr13 | 29530743 | 29532823 |
| chr13 | 29550203 | 29553860 |
| chr13 | 29553760 | 29554673 |
| chr13 | 29553760 | 29560349 |
| chr13 | 29553760 | 29576701 |
| chr13 | 29553760 | 29588846 |
| chr13 | 29767098 | 29777263 |
| chr13 | 30207641 | 30210442 |
| chr13 | 30208514 | 30283791 |
| chr13 | 30208576 | 30241086 |
| chr13 | 30208576 | 30283791 |
| chr13 | 30227411 | 30283687 |
| chr13 | 30227446 | 30283791 |
| chr13 | 30227499 | 30283791 |
| chr13 | 30230510 | 30241086 |
| chr13 | 30230510 | 30283791 |
| chr13 | 30240459 | 30241681 |
| chr13 | 30240459 | 30284383 |
| chr13 | 30240958 | 30284383 |
| chr13 | 30251930 | 30255615 |
| chr13 | 30251930 | 30283791 |
| chr13 | 30254104 | 30255615 |
| chr13 | 30254104 | 30283791 |
| chr13 | 30255446 | 30257867 |
| chr13 | 30255446 | 30284882 |
| chr13 | 30274693 | 30283791 |
| chr13 | 30280062 | 30284383 |
| chr13 | 30280062 | 30284882 |
| chr13 | 31269213 | 31270355 |
| chr13 | 31941307 | 31946181 |
| chr13 | 32432788 | 32444126 |
| chr13 | 32629687 | 32710106 |
| chr13 | 35040977 | 35070852 |
| chr13 | 35171271 | 35196302 |
| chr13 | 36865536 | 36884763 |
| chr13 | 39687502 | 39771363 |
| chr13 | 39694633 | 39751144 |
| chr13 | 39719208 | 39727548 |
| chr13 | 40343956 | 40350302 |

|       |          |          |
|-------|----------|----------|
| chr13 | 40836596 | 40864243 |
| chr13 | 40933469 | 40941370 |
| chr13 | 41252644 | 41260875 |
| chr13 | 41811224 | 41837250 |
| chr13 | 41881958 | 41912168 |
| chr13 | 42119094 | 42129632 |
| chr13 | 45151686 | 45195515 |
| chr13 | 45184413 | 45207505 |
| chr13 | 45516142 | 45534816 |
| chr13 | 46003138 | 46045513 |
| chr13 | 46020448 | 46045513 |
| chr13 | 46020448 | 46052633 |
| chr13 | 46042163 | 46045513 |
| chr13 | 48077152 | 48090418 |
| chr13 | 48253807 | 48261321 |
| chr13 | 48994471 | 49006289 |
| chr13 | 49097547 | 49145935 |
| chr13 | 49701418 | 49746993 |
| chr13 | 49997073 | 50045232 |
| chr13 | 50390197 | 50415202 |
| chr13 | 50492650 | 50493534 |
| chr13 | 50492650 | 50505684 |
| chr13 | 50912994 | 50934999 |
| chr13 | 50927406 | 50950318 |
| chr13 | 51365702 | 51395483 |
| chr13 | 59861406 | 59888367 |
| chr13 | 59911734 | 59932815 |
| chr13 | 72893783 | 72939934 |
| chr13 | 73813151 | 73813677 |
| chr13 | 75560752 | 75590129 |
| chr13 | 75560752 | 75621868 |
| chr13 | 75621762 | 75800882 |
| chr13 | 75621762 | 75804541 |
| chr13 | 75621762 | 75819535 |
| chr13 | 77118339 | 77126542 |
| chr13 | 77126317 | 77129230 |
| chr13 | 87445010 | 87511470 |
| chr13 | 87511365 | 87560417 |
| chr13 | 94586963 | 94592309 |
| chr13 | 94603260 | 94621235 |
| chr13 | 95157160 | 95170628 |
| chr13 | 95194835 | 95216371 |
| chr13 | 95209247 | 95210781 |
| chr13 | 95234609 | 95266264 |
| chr13 | 95815808 | 95837202 |

|       |           |           |
|-------|-----------|-----------|
| chr13 | 95985238  | 95996135  |
| chr13 | 96023039  | 96030751  |
| chr13 | 98148592  | 98213413  |
| chr13 | 98213219  | 98271346  |
| chr13 | 98403871  | 98412034  |
| chr13 | 98500060  | 98519473  |
| chr13 | 98504914  | 98519473  |
| chr13 | 98519242  | 98551973  |
| chr13 | 98955434  | 98976089  |
| chr13 | 99237346  | 99238554  |
| chr13 | 99238426  | 99254954  |
| chr13 | 99340434  | 99367906  |
| chr13 | 99501018  | 99501777  |
| chr14 | 100084686 | 100102379 |
| chr14 | 102193462 | 102197847 |
| chr14 | 102265822 | 102283897 |
| chr14 | 102348278 | 102350048 |
| chr14 | 102662322 | 102681978 |
| chr14 | 102663790 | 102714617 |
| chr14 | 102714422 | 102743710 |
| chr14 | 102816738 | 102830472 |
| chr14 | 102861524 | 102876525 |
| chr14 | 103398950 | 103405267 |
| chr14 | 103398950 | 103451983 |
| chr14 | 103405075 | 103408139 |
| chr14 | 103405075 | 103411765 |
| chr14 | 103405075 | 103438333 |
| chr14 | 103405075 | 103441563 |
| chr14 | 103468085 | 103492034 |
| chr14 | 103587273 | 103590429 |
| chr14 | 103587273 | 103590977 |
| chr14 | 103773612 | 103797518 |
| chr14 | 103773632 | 103797518 |
| chr14 | 103778744 | 103798868 |
| chr14 | 103778744 | 103807869 |
| chr14 | 104713444 | 104714395 |
| chr14 | 104780087 | 104793304 |
| chr14 | 105272720 | 105279033 |
| chr14 | 105379829 | 105380056 |
| chr14 | 20395449  | 20395946  |
| chr14 | 21082478  | 21082827  |
| chr14 | 21230318  | 21248866  |
| chr14 | 21230957  | 21236460  |
| chr14 | 21426127  | 21429038  |
| chr14 | 21495493  | 21499137  |

|       |          |          |
|-------|----------|----------|
| chr14 | 21503172 | 21508235 |
| chr14 | 22571878 | 22575233 |
| chr14 | 22906194 | 22913845 |
| chr14 | 22920987 | 22923160 |
| chr14 | 22987519 | 22998741 |
| chr14 | 23033367 | 23033608 |
| chr14 | 23075495 | 23093544 |
| chr14 | 23293530 | 23299541 |
| chr14 | 23301878 | 23302159 |
| chr14 | 23301880 | 23302159 |
| chr14 | 23301884 | 23302159 |
| chr14 | 23301885 | 23302159 |
| chr14 | 23966282 | 23995133 |
| chr14 | 24202382 | 24211829 |
| chr14 | 24206535 | 24211829 |
| chr14 | 24209889 | 24211829 |
| chr14 | 24211410 | 24211829 |
| chr14 | 24235736 | 24240283 |
| chr14 | 24290721 | 24296881 |
| chr14 | 24430931 | 24431439 |
| chr14 | 26472319 | 26483402 |
| chr14 | 29712937 | 29725674 |
| chr14 | 29724469 | 29725674 |
| chr14 | 30580863 | 30581116 |
| chr14 | 30580863 | 30593639 |
| chr14 | 30622427 | 30628279 |
| chr14 | 30625116 | 30675065 |
| chr14 | 30935162 | 30959498 |
| chr14 | 31127784 | 31129307 |
| chr14 | 31156839 | 31173311 |
| chr14 | 31162592 | 31169468 |
| chr14 | 31169353 | 31173311 |
| chr14 | 31561405 | 31562215 |
| chr14 | 31771815 | 31787873 |
| chr14 | 33922418 | 33931215 |
| chr14 | 33925617 | 33931215 |
| chr14 | 34783761 | 34792835 |
| chr14 | 34862043 | 34862289 |
| chr14 | 35085392 | 35091207 |
| chr14 | 35091231 | 35095047 |
| chr14 | 35125440 | 35180777 |
| chr14 | 35127478 | 35135244 |
| chr14 | 37240432 | 37247907 |
| chr14 | 37240432 | 37268793 |
| chr14 | 37240432 | 37308519 |

|       |          |          |
|-------|----------|----------|
| chr14 | 37240446 | 37308519 |
| chr14 | 37324763 | 37422949 |
| chr14 | 39180502 | 39183830 |
| chr14 | 39399635 | 39402511 |
| chr14 | 45046544 | 45047024 |
| chr14 | 45118027 | 45130790 |
| chr14 | 45149730 | 45155459 |
| chr14 | 46920011 | 46994727 |
| chr14 | 47035010 | 47097039 |
| chr14 | 47301410 | 47440220 |
| chr14 | 49653989 | 49655811 |
| chr14 | 49683592 | 49686503 |
| chr14 | 50114284 | 50140233 |
| chr14 | 50180571 | 50212676 |
| chr14 | 50199690 | 50223670 |
| chr14 | 50237676 | 50303017 |
| chr14 | 50247040 | 50294246 |
| chr14 | 50359027 | 50396017 |
| chr14 | 50626381 | 50645014 |
| chr14 | 50635213 | 50645014 |
| chr14 | 51243855 | 51288063 |
| chr14 | 51333392 | 51489420 |
| chr14 | 51554589 | 51570410 |
| chr14 | 52455323 | 52472987 |
| chr14 | 52457089 | 52476347 |
| chr14 | 52596916 | 52600341 |
| chr14 | 52730458 | 52771183 |
| chr14 | 52778303 | 52784664 |
| chr14 | 54436078 | 54436437 |
| chr14 | 54567672 | 54702580 |
| chr14 | 54604371 | 54702580 |
| chr14 | 54668791 | 54702580 |
| chr14 | 54681934 | 54702580 |
| chr14 | 54702061 | 54705753 |
| chr14 | 54702061 | 54789092 |
| chr14 | 54702061 | 54790908 |
| chr14 | 54736675 | 54737287 |
| chr14 | 54736796 | 54737287 |
| chr14 | 54737023 | 54790908 |
| chr14 | 54962067 | 55000992 |
| chr14 | 55350380 | 55355222 |
| chr14 | 55671788 | 55678444 |
| chr14 | 58286639 | 58291707 |
| chr14 | 58290698 | 58291707 |
| chr14 | 58291634 | 58293926 |

|       |          |          |
|-------|----------|----------|
| chr14 | 58304943 | 58321512 |
| chr14 | 58324466 | 58346505 |
| chr14 | 60114699 | 60134048 |
| chr14 | 60115376 | 60116060 |
| chr14 | 60115376 | 60125823 |
| chr14 | 60115718 | 60124310 |
| chr14 | 60723211 | 60724047 |
| chr14 | 60796216 | 60819051 |
| chr14 | 60811485 | 60879835 |
| chr14 | 61995875 | 61996542 |
| chr14 | 62778664 | 62779924 |
| chr14 | 63598755 | 63599973 |
| chr14 | 63598755 | 63625033 |
| chr14 | 64055921 | 64070910 |
| chr14 | 64223188 | 64225498 |
| chr14 | 64390336 | 64400877 |
| chr14 | 65432036 | 65455718 |
| chr14 | 65455620 | 65458207 |
| chr14 | 65455620 | 65464473 |
| chr14 | 66668905 | 66776521 |
| chr14 | 66681106 | 66688386 |
| chr14 | 66709356 | 66776521 |
| chr14 | 66813218 | 66824566 |
| chr14 | 67182864 | 67198320 |
| chr14 | 67254203 | 67279537 |
| chr14 | 67569216 | 67569582 |
| chr14 | 67592314 | 67592718 |
| chr14 | 67653436 | 67663190 |
| chr14 | 67656415 | 67663190 |
| chr14 | 67821277 | 67887204 |
| chr14 | 67864787 | 67887204 |
| chr14 | 68387112 | 68468250 |
| chr14 | 69089947 | 69122360 |
| chr14 | 69115667 | 69122360 |
| chr14 | 69424093 | 69425578 |
| chr14 | 70976941 | 70995843 |
| chr14 | 70988566 | 70995843 |
| chr14 | 70988569 | 70995925 |
| chr14 | 71050651 | 71060642 |
| chr14 | 71418129 | 71589370 |
| chr14 | 71467046 | 71529370 |
| chr14 | 71508379 | 71529370 |
| chr14 | 72771732 | 72845651 |
| chr14 | 72937970 | 72959028 |
| chr14 | 72958611 | 73058705 |

|       |          |          |
|-------|----------|----------|
| chr14 | 73064971 | 73077536 |
| chr14 | 73272494 | 73274459 |
| chr14 | 73355625 | 73357395 |
| chr14 | 73650008 | 73671597 |
| chr14 | 73729639 | 73730179 |
| chr14 | 73892026 | 73910417 |
| chr14 | 73892151 | 73896534 |
| chr14 | 73931502 | 73932112 |
| chr14 | 73931502 | 73932943 |
| chr14 | 74004604 | 74015930 |
| chr14 | 74514605 | 74516941 |
| chr14 | 74683295 | 74701774 |
| chr14 | 74829212 | 74835908 |
| chr14 | 75018828 | 75048632 |
| chr14 | 75030542 | 75046589 |
| chr14 | 75100228 | 75103997 |
| chr14 | 75622078 | 75646627 |
| chr14 | 75663085 | 75683656 |
| chr14 | 75771733 | 75803253 |
| chr14 | 75782486 | 75803253 |
| chr14 | 75792912 | 75820161 |
| chr14 | 75792915 | 75823937 |
| chr14 | 76154743 | 76172019 |
| chr14 | 76154743 | 76195972 |
| chr14 | 77427371 | 77454102 |
| chr14 | 77512156 | 77518167 |
| chr14 | 77673559 | 77694900 |
| chr14 | 77899099 | 77902748 |
| chr14 | 80421424 | 80530886 |
| chr14 | 80497468 | 80526982 |
| chr14 | 80497468 | 80530886 |
| chr14 | 80726098 | 80743267 |
| chr14 | 80743074 | 80745001 |
| chr14 | 80830151 | 80840768 |
| chr14 | 80836391 | 80840768 |
| chr14 | 80862756 | 80907650 |
| chr14 | 80878852 | 80906081 |
| chr14 | 80904812 | 80924346 |
| chr14 | 86028368 | 86070967 |
| chr14 | 88416710 | 88438146 |
| chr14 | 88626837 | 88644511 |
| chr14 | 88685014 | 88688359 |
| chr14 | 89908711 | 89932627 |
| chr14 | 89924512 | 89932627 |
| chr14 | 89931540 | 89934707 |

|       |           |           |
|-------|-----------|-----------|
| chr14 | 89983113  | 89985210  |
| chr14 | 90019315  | 90023111  |
| chr14 | 90541197  | 90578308  |
| chr14 | 90570592  | 90578308  |
| chr14 | 90687941  | 90689712  |
| chr14 | 90718500  | 90786328  |
| chr14 | 90729629  | 90730196  |
| chr14 | 90943077  | 91041893  |
| chr14 | 90978305  | 91047039  |
| chr14 | 92116101  | 92117642  |
| chr14 | 92124290  | 92138347  |
| chr14 | 93274073  | 93296157  |
| chr14 | 94060645  | 94060912  |
| chr14 | 96341577  | 96347341  |
| chr14 | 96799636  | 96860735  |
| chr14 | 96814212  | 96860735  |
| chr14 | 96828172  | 96860735  |
| chr14 | 96833466  | 96945382  |
| chr14 | 99231344  | 99238511  |
| chr14 | 99457555  | 99458535  |
| chr14 | 99458278  | 99466055  |
| chr14 | 99493464  | 99503644  |
| chr14 | 99850123  | 99851035  |
| chr14 | 99850123  | 99865646  |
| chr15 | 100132006 | 100134621 |
| chr15 | 100327375 | 100331054 |
| chr15 | 100330888 | 100334180 |
| chr15 | 100914700 | 100924729 |
| chr15 | 101151719 | 101178980 |
| chr15 | 22523346  | 22539247  |
| chr15 | 22995098  | 23003153  |
| chr15 | 23008644  | 23010133  |
| chr15 | 23008698  | 23019380  |
| chr15 | 24967028  | 24968082  |
| chr15 | 24967931  | 24968529  |
| chr15 | 24976304  | 24982437  |
| chr15 | 25393745  | 25411971  |
| chr15 | 25405460  | 25415842  |
| chr15 | 25405460  | 25429680  |
| chr15 | 28259694  | 28265974  |
| chr15 | 28292887  | 28312874  |
| chr15 | 28751487  | 28754897  |
| chr15 | 28995752  | 29028364  |
| chr15 | 28995756  | 29101784  |
| chr15 | 29704161  | 29705737  |



|       |          |          |
|-------|----------|----------|
| chr15 | 29759890 | 29773357 |
| chr15 | 30635079 | 30641617 |
| chr15 | 30635486 | 30641617 |
| chr15 | 30638745 | 30716342 |
| chr15 | 30658765 | 30716342 |
| chr15 | 30658765 | 30750556 |
| chr15 | 30716219 | 30721271 |
| chr15 | 30716219 | 30769064 |
| chr15 | 30745021 | 30750556 |
| chr15 | 30745177 | 30750556 |
| chr15 | 30748575 | 30769064 |
| chr15 | 31685344 | 31689481 |
| chr15 | 32523028 | 32524600 |
| chr15 | 32625486 | 32643818 |
| chr15 | 32633932 | 32636408 |
| chr15 | 32643585 | 32644359 |
| chr15 | 32857014 | 33018931 |
| chr15 | 32926173 | 33018927 |
| chr15 | 34003031 | 34005851 |
| chr15 | 34003031 | 34023497 |
| chr15 | 34084208 | 34088133 |
| chr15 | 34163559 | 34177999 |
| chr15 | 34882501 | 34883282 |
| chr15 | 34963659 | 34964290 |
| chr15 | 35450684 | 35484507 |
| chr15 | 35450684 | 35490197 |
| chr15 | 38283496 | 38299547 |
| chr15 | 39588396 | 39741900 |
| chr15 | 40628069 | 40650819 |
| chr15 | 40628208 | 40628588 |
| chr15 | 40629272 | 40642972 |
| chr15 | 40645655 | 40650819 |
| chr15 | 40676071 | 40706294 |
| chr15 | 40706176 | 40731344 |
| chr15 | 40709024 | 40731344 |
| chr15 | 40709024 | 40734704 |
| chr15 | 40729504 | 40734704 |
| chr15 | 40731054 | 40731344 |
| chr15 | 40736498 | 40737726 |
| chr15 | 40854689 | 40855027 |
| chr15 | 40902615 | 40903831 |
| chr15 | 41517515 | 41518182 |
| chr15 | 41526897 | 41533463 |
| chr15 | 41668787 | 41669958 |
| chr15 | 41668827 | 41675721 |

|       |          |          |
|-------|----------|----------|
| chr15 | 41740056 | 41754567 |
| chr15 | 41750380 | 41761850 |
| chr15 | 42198464 | 42199961 |
| chr15 | 42338388 | 42354453 |
| chr15 | 42716676 | 42719566 |
| chr15 | 42794643 | 42908467 |
| chr15 | 42829937 | 42855200 |
| chr15 | 42855117 | 42878684 |
| chr15 | 42871444 | 42878684 |
| chr15 | 42878548 | 42893468 |
| chr15 | 43333270 | 43351041 |
| chr15 | 43361161 | 43361941 |
| chr15 | 43828216 | 43842516 |
| chr15 | 44337762 | 44339481 |
| chr15 | 44413335 | 44414615 |
| chr15 | 44458990 | 44464848 |
| chr15 | 44497026 | 44503850 |
| chr15 | 44560248 | 44563225 |
| chr15 | 44604802 | 44613536 |
| chr15 | 44648865 | 44657263 |
| chr15 | 44736482 | 44756463 |
| chr15 | 48331479 | 48332196 |
| chr15 | 48596282 | 48717169 |
| chr15 | 49225204 | 49239367 |
| chr15 | 49225204 | 49292537 |
| chr15 | 49225204 | 49319805 |
| chr15 | 49235850 | 49308777 |
| chr15 | 49235850 | 49328130 |
| chr15 | 49292326 | 49308777 |
| chr15 | 49489168 | 49508348 |
| chr15 | 50432337 | 50439177 |
| chr15 | 50432337 | 50459162 |
| chr15 | 50634381 | 50725323 |
| chr15 | 50643339 | 50675566 |
| chr15 | 50662966 | 50675566 |
| chr15 | 50949878 | 50999262 |
| chr15 | 51533655 | 51538452 |
| chr15 | 52023259 | 52047015 |
| chr15 | 52024582 | 52047015 |
| chr15 | 55223888 | 55389433 |
| chr15 | 55915283 | 55916911 |
| chr15 | 56142777 | 56181554 |
| chr15 | 56142777 | 56243287 |
| chr15 | 56631437 | 56635250 |
| chr15 | 56887805 | 56890167 |

|       |          |          |
|-------|----------|----------|
| chr15 | 57091788 | 57095163 |
| chr15 | 58698279 | 58717727 |
| chr15 | 58771958 | 58831916 |
| chr15 | 58879979 | 58883786 |
| chr15 | 58886974 | 58887620 |
| chr15 | 58899468 | 58899709 |
| chr15 | 58916934 | 58933582 |
| chr15 | 59030803 | 59095030 |
| chr15 | 59099993 | 59123627 |
| chr15 | 59272305 | 59275196 |
| chr15 | 60436142 | 60436713 |
| chr15 | 62007307 | 62014013 |
| chr15 | 63526919 | 63537156 |
| chr15 | 63528628 | 63537156 |
| chr15 | 63530497 | 63537156 |
| chr15 | 63532646 | 63543165 |
| chr15 | 63542054 | 63563008 |
| chr15 | 63588828 | 63594786 |
| chr15 | 63745726 | 63747858 |
| chr15 | 64156161 | 64156724 |
| chr15 | 64156184 | 64156724 |
| chr15 | 64203081 | 64353806 |
| chr15 | 64495839 | 64500166 |
| chr15 | 64499292 | 64500166 |
| chr15 | 64622826 | 64626632 |
| chr15 | 64678115 | 64681900 |
| chr15 | 64818369 | 64819116 |
| chr15 | 64859893 | 64865228 |
| chr15 | 65118671 | 65119954 |
| chr15 | 65579354 | 65591731 |
| chr15 | 66119085 | 66135090 |
| chr15 | 66308708 | 66487292 |
| chr15 | 66331409 | 66352955 |
| chr15 | 66435026 | 66435259 |
| chr15 | 66499555 | 66503529 |
| chr15 | 66499559 | 66502750 |
| chr15 | 66708498 | 66716498 |
| chr15 | 67226900 | 67236820 |
| chr15 | 67231229 | 67231897 |
| chr15 | 67231229 | 67236820 |
| chr15 | 67830190 | 67833942 |
| chr15 | 68645159 | 68652019 |
| chr15 | 70656929 | 70664814 |
| chr15 | 70656963 | 70660216 |
| chr15 | 70656963 | 70664814 |

|       |          |          |
|-------|----------|----------|
| chr15 | 71133253 | 71154932 |
| chr15 | 71411686 | 71542465 |
| chr15 | 71601958 | 71660734 |
| chr15 | 71660529 | 71682137 |
| chr15 | 71991102 | 72010450 |
| chr15 | 72199780 | 72200473 |
| chr15 | 72209672 | 72223524 |
| chr15 | 72241900 | 72271104 |
| chr15 | 72488782 | 72518134 |
| chr15 | 72496790 | 72544964 |
| chr15 | 72524905 | 72561549 |
| chr15 | 72760406 | 72762598 |
| chr15 | 72760406 | 72780322 |
| chr15 | 72774871 | 72780322 |
| chr15 | 73558305 | 73573795 |
| chr15 | 74640465 | 74645004 |
| chr15 | 74918756 | 74926887 |
| chr15 | 75364487 | 75364862 |
| chr15 | 75400729 | 75436443 |
| chr15 | 75422646 | 75437580 |
| chr15 | 75597339 | 75598681 |
| chr15 | 75598278 | 75598681 |
| chr15 | 75598278 | 75621056 |
| chr15 | 75600636 | 75601218 |
| chr15 | 75601137 | 75621002 |
| chr15 | 76214524 | 76231398 |
| chr15 | 76274411 | 76297348 |
| chr15 | 76434077 | 76567405 |
| chr15 | 76504858 | 76541725 |
| chr15 | 76567269 | 76574284 |
| chr15 | 76728408 | 76728737 |
| chr15 | 76728408 | 76733384 |
| chr15 | 76816424 | 76841931 |
| chr15 | 76850734 | 76862533 |
| chr15 | 77046775 | 77056255 |
| chr15 | 77046788 | 77056255 |
| chr15 | 77239781 | 77286504 |
| chr15 | 77252366 | 77284030 |
| chr15 | 77252366 | 77357099 |
| chr15 | 77252366 | 77365225 |
| chr15 | 77252366 | 77412774 |
| chr15 | 77283882 | 77286504 |
| chr15 | 77284957 | 77346611 |
| chr15 | 77284957 | 77412774 |
| chr15 | 77477554 | 77517356 |

|       |          |          |
|-------|----------|----------|
| chr15 | 78008679 | 78009114 |
| chr15 | 78155212 | 78169081 |
| chr15 | 78157547 | 78169077 |
| chr15 | 78289618 | 78290556 |
| chr15 | 78289618 | 78290575 |
| chr15 | 78289618 | 78290583 |
| chr15 | 78593091 | 78593628 |
| chr15 | 78593091 | 78598537 |
| chr15 | 78593091 | 78601387 |
| chr15 | 79456097 | 79469145 |
| chr15 | 79843858 | 79845442 |
| chr15 | 79884857 | 79889354 |
| chr15 | 79889092 | 79899125 |
| chr15 | 80158059 | 80197219 |
| chr15 | 80970461 | 80982182 |
| chr15 | 80978765 | 80982182 |
| chr15 | 81079884 | 81143820 |
| chr15 | 81127589 | 81259880 |
| chr15 | 82151464 | 82215668 |
| chr15 | 82400632 | 82408367 |
| chr15 | 82400659 | 82414804 |
| chr15 | 82404611 | 82414804 |
| chr15 | 82404611 | 82415675 |
| chr15 | 82414600 | 82420075 |
| chr15 | 82627192 | 82628550 |
| chr15 | 82627192 | 82641682 |
| chr15 | 82849688 | 82854800 |
| chr15 | 82852141 | 82892801 |
| chr15 | 83151214 | 83192308 |
| chr15 | 83151214 | 83194460 |
| chr15 | 84523199 | 84555070 |
| chr15 | 84526780 | 84555070 |
| chr15 | 84542144 | 84544649 |
| chr15 | 84637346 | 84641262 |
| chr15 | 84642194 | 84643723 |
| chr15 | 84755661 | 84764815 |
| chr15 | 85474755 | 85521575 |
| chr15 | 85653270 | 85710645 |
| chr15 | 88464912 | 88465586 |
| chr15 | 89245606 | 89260843 |
| chr15 | 89245755 | 89260843 |
| chr15 | 89835461 | 89837722 |
| chr15 | 89852360 | 89877424 |
| chr15 | 89860922 | 89889140 |
| chr15 | 89865494 | 89889140 |

|       |          |          |
|-------|----------|----------|
| chr15 | 90593635 | 90593939 |
| chr15 | 90614509 | 90641257 |
| chr15 | 90713166 | 90715042 |
| chr15 | 90948283 | 90948627 |
| chr15 | 90959899 | 90961774 |
| chr15 | 92950320 | 92956649 |
| chr15 | 96118842 | 96132062 |
| chr15 | 96118842 | 96191394 |
| chr15 | 96285296 | 96290783 |
| chr15 | 96334075 | 96337535 |
| chr15 | 99215620 | 99228732 |
| chr15 | 99256031 | 99287951 |
| chr15 | 99256031 | 99352471 |
| chr15 | 99598429 | 99602109 |
| chr15 | 99645560 | 99651688 |
| chr16 | 10387143 | 10472183 |
| chr16 | 10515062 | 10547677 |
| chr16 | 11020192 | 11033943 |
| chr16 | 11841694 | 11849672 |
| chr16 | 11846500 | 11849385 |
| chr16 | 11886470 | 11894148 |
| chr16 | 11894953 | 11905831 |
| chr16 | 12042846 | 12129758 |
| chr16 | 13235029 | 13237321 |
| chr16 | 1455816  | 1456112  |
| chr16 | 14590489 | 14604226 |
| chr16 | 1499192  | 1500488  |
| chr16 | 15034553 | 15035426 |
| chr16 | 15047417 | 15048099 |
| chr16 | 15483936 | 15515428 |
| chr16 | 15498065 | 15515428 |
| chr16 | 15513283 | 15515428 |
| chr16 | 15532986 | 15583238 |
| chr16 | 15695907 | 15696860 |
| chr16 | 16016495 | 16016917 |
| chr16 | 16141172 | 16142942 |
| chr16 | 1614638  | 1632365  |
| chr16 | 1614638  | 1652581  |
| chr16 | 1743331  | 1748720  |
| chr16 | 1809237  | 1809833  |
| chr16 | 18543616 | 18558854 |
| chr16 | 18547227 | 18558854 |
| chr16 | 18782780 | 18783102 |
| chr16 | 18782780 | 18784823 |
| chr16 | 18782780 | 18788142 |

|       |          |          |
|-------|----------|----------|
| chr16 | 18782780 | 18789118 |
| chr16 | 18889371 | 18900044 |
| chr16 | 19071927 | 19074097 |
| chr16 | 192225   | 193015   |
| chr16 | 1962930  | 1963148  |
| chr16 | 1962932  | 1963148  |
| chr16 | 19706591 | 19711440 |
| chr16 | 19732828 | 19733827 |
| chr16 | 2002753  | 2002990  |
| chr16 | 2020312  | 2020506  |
| chr16 | 2055979  | 2058873  |
| chr16 | 20860047 | 20862643 |
| chr16 | 2097147  | 2098025  |
| chr16 | 2111926  | 2112339  |
| chr16 | 21315883 | 21317126 |
| chr16 | 21338920 | 21352138 |
| chr16 | 21611672 | 21625115 |
| chr16 | 21961327 | 21976243 |
| chr16 | 220648   | 229498   |
| chr16 | 2246094  | 2246986  |
| chr16 | 2253303  | 2254063  |
| chr16 | 23102318 | 23120246 |
| chr16 | 2317439  | 2317647  |
| chr16 | 23388985 | 23417121 |
| chr16 | 23523053 | 23532765 |
| chr16 | 23544513 | 23554635 |
| chr16 | 23581053 | 23587319 |
| chr16 | 23603586 | 23608012 |
| chr16 | 23621361 | 23629959 |
| chr16 | 2448978  | 2449251  |
| chr16 | 24540611 | 24553557 |
| chr16 | 24750725 | 24758599 |
| chr16 | 24776932 | 24778468 |
| chr16 | 24910305 | 24911494 |
| chr16 | 24927683 | 24939597 |
| chr16 | 25151553 | 25158958 |
| chr16 | 25252945 | 25255384 |
| chr16 | 2613959  | 2697997  |
| chr16 | 27211145 | 27215008 |
| chr16 | 27334315 | 27340273 |
| chr16 | 2756333  | 2895320  |
| chr16 | 27627845 | 27628830 |
| chr16 | 28169456 | 28169909 |
| chr16 | 288275   | 289439   |
| chr16 | 28871779 | 28873579 |

|       |          |          |
|-------|----------|----------|
| chr16 | 2896351  | 2899231  |
| chr16 | 28963704 | 28964039 |
| chr16 | 2937384  | 2938162  |
| chr16 | 2948687  | 2951125  |
| chr16 | 296176   | 298251   |
| chr16 | 29798747 | 29798950 |
| chr16 | 29831073 | 29833699 |
| chr16 | 29871589 | 29873729 |
| chr16 | 29904851 | 29905959 |
| chr16 | 29904851 | 29906127 |
| chr16 | 29905787 | 29906127 |
| chr16 | 29963106 | 29972140 |
| chr16 | 29983242 | 29985578 |
| chr16 | 30365288 | 30365494 |
| chr16 | 3057032  | 3058272  |
| chr16 | 30666990 | 30667296 |
| chr16 | 31061609 | 31062280 |
| chr16 | 31061609 | 31064481 |
| chr16 | 31090774 | 31091342 |
| chr16 | 31473440 | 31473838 |
| chr16 | 31718912 | 31723353 |
| chr16 | 346147   | 347101   |
| chr16 | 3674514  | 3675323  |
| chr16 | 3850296  | 3854850  |
| chr16 | 425650   | 489000   |
| chr16 | 4332214  | 4333519  |
| chr16 | 4332214  | 4335393  |
| chr16 | 4446885  | 4455780  |
| chr16 | 4450399  | 4455780  |
| chr16 | 4466152  | 4469698  |
| chr16 | 4634722  | 4657363  |
| chr16 | 46674313 | 46681520 |
| chr16 | 46897647 | 46900883 |
| chr16 | 47109482 | 47134410 |
| chr16 | 47122656 | 47134410 |
| chr16 | 47128324 | 47134410 |
| chr16 | 47129223 | 47134410 |
| chr16 | 47365787 | 47429957 |
| chr16 | 47439842 | 47459175 |
| chr16 | 47463898 | 47499894 |
| chr16 | 47463898 | 47515601 |
| chr16 | 47474358 | 47547548 |
| chr16 | 47497398 | 47550205 |
| chr16 | 47497398 | 47562495 |
| chr16 | 4751298  | 4766076  |



|       |          |          |
|-------|----------|----------|
| chr16 | 48252224 | 48262872 |
| chr16 | 48252224 | 48270274 |
| chr16 | 48252224 | 48303305 |
| chr16 | 48252224 | 48334358 |
| chr16 | 482524   | 491268   |
| chr16 | 48256643 | 48303305 |
| chr16 | 48275086 | 48303305 |
| chr16 | 48334215 | 48336498 |
| chr16 | 48343801 | 48348290 |
| chr16 | 48355337 | 48362430 |
| chr16 | 48553538 | 48570292 |
| chr16 | 48560753 | 48570292 |
| chr16 | 50786838 | 50793664 |
| chr16 | 53154446 | 53157541 |
| chr16 | 53245421 | 53263097 |
| chr16 | 53245766 | 53285699 |
| chr16 | 53307680 | 53319951 |
| chr16 | 53442657 | 53490301 |
| chr16 | 53764161 | 53844298 |
| chr16 | 53810139 | 53826456 |
| chr16 | 53825863 | 53838205 |
| chr16 | 53844154 | 53845086 |
| chr16 | 53873785 | 53919764 |
| chr16 | 53933984 | 53937294 |
| chr16 | 53933984 | 53937441 |
| chr16 | 53933984 | 53937833 |
| chr16 | 53933984 | 53954508 |
| chr16 | 56385918 | 56415884 |
| chr16 | 56454773 | 56467293 |
| chr16 | 56484760 | 56501025 |
| chr16 | 56497098 | 56497742 |
| chr16 | 56837607 | 56839035 |
| chr16 | 57172223 | 57172874 |
| chr16 | 57431306 | 57432486 |
| chr16 | 58403097 | 58405110 |
| chr16 | 58504009 | 58541620 |
| chr16 | 58559803 | 58560362 |
| chr16 | 58708078 | 58709567 |
| chr16 | 66604818 | 66609530 |
| chr16 | 66730111 | 66732505 |
| chr16 | 66939226 | 66942737 |
| chr16 | 67046151 | 67066798 |
| chr16 | 67063627 | 67066798 |
| chr16 | 67066681 | 67073822 |
| chr16 | 67066681 | 67079782 |

|       |          |          |
|-------|----------|----------|
| chr16 | 67066681 | 67099799 |
| chr16 | 67144833 | 67147558 |
| chr16 | 67174161 | 67175238 |
| chr16 | 67200968 | 67201336 |
| chr16 | 67255838 | 67256689 |
| chr16 | 67685456 | 67699341 |
| chr16 | 67685456 | 67705094 |
| chr16 | 67744287 | 67759732 |
| chr16 | 67939885 | 67940478 |
| chr16 | 68093355 | 68126610 |
| chr16 | 68157958 | 68183366 |
| chr16 | 68175999 | 68191775 |
| chr16 | 68249289 | 68252653 |
| chr16 | 68271333 | 68275249 |
| chr16 | 68287322 | 68287871 |
| chr16 | 68287322 | 68290540 |
| chr16 | 68287745 | 68297476 |
| chr16 | 68287745 | 68316074 |
| chr16 | 68557997 | 68579938 |
| chr16 | 69105684 | 69110031 |
| chr16 | 69133511 | 69139914 |
| chr16 | 69148993 | 69150904 |
| chr16 | 69155870 | 69168998 |
| chr16 | 69235747 | 69245815 |
| chr16 | 69235747 | 69260260 |
| chr16 | 69235747 | 69284244 |
| chr16 | 69260170 | 69284244 |
| chr16 | 69288292 | 69299774 |
| chr16 | 69311405 | 69318711 |
| chr16 | 69328637 | 69332882 |
| chr16 | 69586209 | 69626528 |
| chr16 | 69936452 | 69937076 |
| chr16 | 70036431 | 70039100 |
| chr16 | 70213656 | 70222480 |
| chr16 | 70213660 | 70222480 |
| chr16 | 70219870 | 70222480 |
| chr16 | 70269783 | 70270195 |
| chr16 | 70317495 | 70356247 |
| chr16 | 70356111 | 70361636 |
| chr16 | 70356111 | 70372777 |
| chr16 | 70379170 | 70381862 |
| chr16 | 70677791 | 70678368 |
| chr16 | 70780789 | 70789052 |
| chr16 | 71662697 | 71664099 |
| chr16 | 71676446 | 71677404 |

|       |          |          |
|-------|----------|----------|
| chr16 | 71702245 | 71702731 |
| chr16 | 71748407 | 71749893 |
| chr16 | 71789278 | 71798970 |
| chr16 | 71894720 | 71895589 |
| chr16 | 72173922 | 72349206 |
| chr16 | 72193276 | 72349206 |
| chr16 | 72284571 | 72308188 |
| chr16 | 72308055 | 72368722 |
| chr16 | 72368652 | 72391215 |
| chr16 | 72391070 | 72523415 |
| chr16 | 72523331 | 72617553 |
| chr16 | 72554313 | 72555326 |
| chr16 | 72555264 | 72555946 |
| chr16 | 72555264 | 72617553 |
| chr16 | 72570434 | 72617553 |
| chr16 | 736421   | 737185   |
| chr16 | 74348402 | 74350738 |
| chr16 | 74451054 | 74459789 |
| chr16 | 74451054 | 74463479 |
| chr16 | 74459819 | 74462093 |
| chr16 | 74660931 | 74664745 |
| chr16 | 74923925 | 74949947 |
| chr16 | 75293909 | 75305182 |
| chr16 | 75362874 | 75395209 |
| chr16 | 75385649 | 75395209 |
| chr16 | 75600219 | 75622464 |
| chr16 | 75627835 | 75634292 |
| chr16 | 81041355 | 81045141 |
| chr16 | 81319368 | 81365478 |
| chr16 | 81351582 | 81377702 |
| chr16 | 81377218 | 81377702 |
| chr16 | 84124658 | 84130171 |
| chr16 | 84135543 | 84140262 |
| chr16 | 84661577 | 84663165 |
| chr16 | 84740308 | 84745826 |
| chr16 | 86485631 | 86491004 |
| chr16 | 869962   | 879737   |
| chr16 | 87308532 | 87311296 |
| chr16 | 87748672 | 87762036 |
| chr16 | 87755193 | 87762150 |
| chr16 | 87975047 | 87987904 |
| chr16 | 88004294 | 88008187 |
| chr16 | 88610441 | 88611536 |
| chr16 | 88722420 | 88722582 |
| chr16 | 89098484 | 89133262 |

|       |          |          |
|-------|----------|----------|
| chr16 | 89098576 | 89102759 |
| chr16 | 89102603 | 89117086 |
| chr16 | 89305205 | 89427069 |
| chr16 | 89361494 | 89418368 |
| chr16 | 89418283 | 89422305 |
| chr16 | 89418283 | 89427069 |
| chr16 | 89426766 | 89431326 |
| chr16 | 89560712 | 89560916 |
| chr16 | 89978809 | 89979448 |
| chr16 | 9102983  | 9117064  |
| chr16 | 910930   | 913353   |
| chr16 | 934189   | 954666   |
| chr17 | 1050049  | 1102027  |
| chr17 | 1112118  | 1125367  |
| chr17 | 12066156 | 12095694 |
| chr17 | 12820485 | 12896511 |
| chr17 | 14033551 | 14034416 |
| chr17 | 15503097 | 15547148 |
| chr17 | 15677175 | 15677721 |
| chr17 | 15677175 | 15683157 |
| chr17 | 15977962 | 15987368 |
| chr17 | 16034764 | 16036719 |
| chr17 | 16194461 | 16198719 |
| chr17 | 16228872 | 16234070 |
| chr17 | 16325799 | 16326905 |
| chr17 | 17070879 | 17078076 |
| chr17 | 17078010 | 17098193 |
| chr17 | 17261599 | 17264981 |
| chr17 | 17683545 | 17724159 |
| chr17 | 1781214  | 1787604  |
| chr17 | 18206814 | 18208375 |
| chr17 | 18273243 | 18278357 |
| chr17 | 1842802  | 1846641  |
| chr17 | 18519481 | 18521145 |
| chr17 | 18680854 | 18681614 |
| chr17 | 19274050 | 19274318 |
| chr17 | 19274050 | 19274430 |
| chr17 | 19276396 | 19283714 |
| chr17 | 19279861 | 19283714 |
| chr17 | 19306092 | 19329647 |
| chr17 | 19773167 | 19776407 |
| chr17 | 19919154 | 19924517 |
| chr17 | 20017986 | 20110562 |
| chr17 | 20204332 | 20205936 |
| chr17 | 20204332 | 20213240 |

|       |          |          |
|-------|----------|----------|
| chr17 | 20296960 | 20314223 |
| chr17 | 21002444 | 21028674 |
| chr17 | 2163759  | 2172859  |
| chr17 | 2328975  | 2329475  |
| chr17 | 2362988  | 2364376  |
| chr17 | 2372488  | 2372926  |
| chr17 | 2379035  | 2381162  |
| chr17 | 238380   | 247285   |
| chr17 | 2414394  | 2415954  |
| chr17 | 2414394  | 2420596  |
| chr17 | 2414394  | 2420904  |
| chr17 | 2438108  | 2470220  |
| chr17 | 247110   | 258418   |
| chr17 | 2617196  | 2638320  |
| chr17 | 2672757  | 2674031  |
| chr17 | 2700845  | 2701139  |
| chr17 | 2700854  | 2701139  |
| chr17 | 27301805 | 27303635 |
| chr17 | 27303512 | 27311616 |
| chr17 | 28122602 | 28132809 |
| chr17 | 28122602 | 28196288 |
| chr17 | 28172516 | 28205124 |
| chr17 | 28348018 | 28355876 |
| chr17 | 28591697 | 28592477 |
| chr17 | 28598509 | 28599830 |
| chr17 | 28612796 | 28613077 |
| chr17 | 28649188 | 28655483 |
| chr17 | 28921687 | 28944569 |
| chr17 | 2905283  | 2909070  |
| chr17 | 29451454 | 29542672 |
| chr17 | 29451486 | 29482288 |
| chr17 | 30384988 | 30390159 |
| chr17 | 30495425 | 30520021 |
| chr17 | 30607551 | 30648456 |
| chr17 | 30769000 | 30780739 |
| chr17 | 31349119 | 31374731 |
| chr17 | 31988111 | 31988497 |
| chr17 | 31993887 | 31995762 |
| chr17 | 32020696 | 32031458 |
| chr17 | 32362913 | 32369745 |
| chr17 | 32367771 | 32377993 |
| chr17 | 34951949 | 35017606 |
| chr17 | 34983231 | 34986131 |
| chr17 | 35026373 | 35036518 |
| chr17 | 35063575 | 35066466 |

|       |          |          |
|-------|----------|----------|
| chr17 | 35846905 | 35850048 |
| chr17 | 3605210  | 3608565  |
| chr17 | 36492731 | 36496406 |
| chr17 | 36507162 | 36507398 |
| chr17 | 36508896 | 36511455 |
| chr17 | 37568790 | 37579434 |
| chr17 | 37576340 | 37579434 |
| chr17 | 38359962 | 38377842 |
| chr17 | 38361710 | 38400855 |
| chr17 | 38806764 | 38810400 |
| chr17 | 39708329 | 39710481 |
| chr17 | 40026355 | 40026646 |
| chr17 | 40100063 | 40100300 |
| chr17 | 40308951 | 40309286 |
| chr17 | 4064360  | 4065008  |
| chr17 | 41689069 | 41689401 |
| chr17 | 41874002 | 41878102 |
| chr17 | 41907598 | 41908988 |
| chr17 | 4197372  | 4249248  |
| chr17 | 41976792 | 41977260 |
| chr17 | 41987594 | 41990382 |
| chr17 | 41994869 | 42003557 |
| chr17 | 41996310 | 42003557 |
| chr17 | 42000481 | 42003557 |
| chr17 | 4206320  | 4249248  |
| chr17 | 4216982  | 4249248  |
| chr17 | 42322281 | 42348520 |
| chr17 | 42613646 | 42663503 |
| chr17 | 42727661 | 42730918 |
| chr17 | 4282797  | 4296809  |
| chr17 | 4289229  | 4296809  |
| chr17 | 4289229  | 4303745  |
| chr17 | 4296716  | 4303745  |
| chr17 | 43045661 | 43063951 |
| chr17 | 43045661 | 43067695 |
| chr17 | 44075087 | 44075287 |
| chr17 | 44154555 | 44155441 |
| chr17 | 44194516 | 44198130 |
| chr17 | 44464471 | 44493720 |
| chr17 | 44681948 | 44683959 |
| chr17 | 44797562 | 44807469 |
| chr17 | 44804587 | 44807469 |
| chr17 | 44805253 | 44807469 |
| chr17 | 45024372 | 45034999 |
| chr17 | 45033934 | 45034390 |

|       |          |          |
|-------|----------|----------|
| chr17 | 4541913  | 4542463  |
| chr17 | 4541916  | 4542463  |
| chr17 | 45437823 | 45450763 |
| chr17 | 46048021 | 46094701 |
| chr17 | 46050532 | 46169605 |
| chr17 | 46066536 | 46120049 |
| chr17 | 46066536 | 46167564 |
| chr17 | 46082440 | 46120049 |
| chr17 | 46082440 | 46140444 |
| chr17 | 46082440 | 46162525 |
| chr17 | 46094559 | 46130753 |
| chr17 | 46094559 | 46162525 |
| chr17 | 46094559 | 46169605 |
| chr17 | 46156773 | 46172232 |
| chr17 | 46167479 | 46172232 |
| chr17 | 46169530 | 46172232 |
| chr17 | 46170854 | 46172106 |
| chr17 | 46170854 | 46177272 |
| chr17 | 47169916 | 47172013 |
| chr17 | 47453326 | 47491192 |
| chr17 | 47696078 | 47699697 |
| chr17 | 48112030 | 48121565 |
| chr17 | 48848063 | 48866301 |
| chr17 | 4894633  | 4895048  |
| chr17 | 49041377 | 49042388 |
| chr17 | 49298105 | 49317983 |
| chr17 | 49311311 | 49322508 |
| chr17 | 49312697 | 49317499 |
| chr17 | 49316825 | 49322508 |
| chr17 | 50139604 | 50140092 |
| chr17 | 50551679 | 50551945 |
| chr17 | 50749218 | 50750694 |
| chr17 | 51041500 | 51052891 |
| chr17 | 51041500 | 51070258 |
| chr17 | 51047374 | 51068012 |
| chr17 | 5297344  | 5308822  |
| chr17 | 5297344  | 5346925  |
| chr17 | 5297355  | 5308822  |
| chr17 | 5344843  | 5346925  |
| chr17 | 54912665 | 54942491 |
| chr17 | 55031191 | 55081183 |
| chr17 | 55315226 | 55320851 |
| chr17 | 56847921 | 56856665 |
| chr17 | 56848695 | 56856665 |
| chr17 | 57978077 | 57979313 |

|       |          |          |
|-------|----------|----------|
| chr17 | 58003650 | 58006527 |
| chr17 | 58087081 | 58089421 |
| chr17 | 58705877 | 58709990 |
| chr17 | 58720745 | 58730307 |
| chr17 | 58810882 | 58972925 |
| chr17 | 58999380 | 59049257 |
| chr17 | 59070822 | 59084037 |
| chr17 | 59104003 | 59104394 |
| chr17 | 59169587 | 59169880 |
| chr17 | 59257121 | 59275970 |
| chr17 | 59696118 | 59697978 |
| chr17 | 59731420 | 59773944 |
| chr17 | 59764970 | 59773944 |
| chr17 | 59764970 | 59792686 |
| chr17 | 59838294 | 59840088 |
| chr17 | 59935192 | 59937774 |
| chr17 | 60226038 | 60226879 |
| chr17 | 60345480 | 60377292 |
| chr17 | 60345480 | 60380399 |
| chr17 | 60500398 | 60509375 |
| chr17 | 60500398 | 60517923 |
| chr17 | 60630354 | 60648082 |
| chr17 | 60656598 | 60657042 |
| chr17 | 60679452 | 60709552 |
| chr17 | 60980557 | 60990235 |
| chr17 | 61456487 | 61457631 |
| chr17 | 61758673 | 61793729 |
| chr17 | 61776400 | 61808548 |
| chr17 | 62029540 | 62063222 |
| chr17 | 62029850 | 62063222 |
| chr17 | 62052536 | 62063222 |
| chr17 | 623532   | 632841   |
| chr17 | 62680453 | 62680777 |
| chr17 | 63009536 | 63030089 |
| chr17 | 63028003 | 63074014 |
| chr17 | 63151269 | 63200957 |
| chr17 | 63232514 | 63267873 |
| chr17 | 63576963 | 63579943 |
| chr17 | 63799588 | 63806151 |
| chr17 | 63805043 | 63809659 |
| chr17 | 64542943 | 64578576 |
| chr17 | 64591083 | 64594104 |
| chr17 | 64821766 | 64824872 |
| chr17 | 6525355  | 6590630  |
| chr17 | 655837   | 657549   |



|       |          |          |
|-------|----------|----------|
| chr17 | 65851803 | 65888152 |
| chr17 | 66096250 | 66139600 |
| chr17 | 66468590 | 66496283 |
| chr17 | 66472504 | 66496283 |
| chr17 | 66495571 | 66496283 |
| chr17 | 66496200 | 66514466 |
| chr17 | 67151045 | 67185145 |
| chr17 | 67166477 | 67173083 |
| chr17 | 67891846 | 67894165 |
| chr17 | 68306942 | 68359753 |
| chr17 | 68401359 | 68420506 |
| chr17 | 69273942 | 69284072 |
| chr17 | 697417   | 701857   |
| chr17 | 72736649 | 72738902 |
| chr17 | 72841757 | 72849804 |
| chr17 | 72849104 | 72849804 |
| chr17 | 73203036 | 73203793 |
| chr17 | 744435   | 748032   |
| chr17 | 75262867 | 75263321 |
| chr17 | 75651185 | 75666620 |
| chr17 | 75671815 | 75691535 |
| chr17 | 7572864  | 7574227  |
| chr17 | 75791759 | 75797397 |
| chr17 | 76001541 | 76001846 |
| chr17 | 76385450 | 76387437 |
| chr17 | 76385456 | 76385654 |
| chr17 | 76487711 | 76488132 |
| chr17 | 76558373 | 76559043 |
| chr17 | 76738395 | 76776541 |
| chr17 | 78004169 | 78031842 |
| chr17 | 78004169 | 78051448 |
| chr17 | 78031515 | 78036410 |
| chr17 | 78190969 | 78192785 |
| chr17 | 78400676 | 78401106 |
| chr17 | 78400734 | 78401057 |
| chr17 | 78414878 | 78424181 |
| chr17 | 78414878 | 78424192 |
| chr17 | 78414951 | 78419725 |
| chr17 | 787964   | 792509   |
| chr17 | 7936817  | 7937127  |
| chr17 | 80135312 | 80140140 |
| chr17 | 80470526 | 80473444 |
| chr17 | 80619541 | 80643810 |
| chr17 | 80619626 | 80643810 |
| chr17 | 80619626 | 80707999 |

|       |          |          |
|-------|----------|----------|
| chr17 | 80640442 | 80643810 |
| chr17 | 80707444 | 80707999 |
| chr17 | 80707840 | 80709114 |
| chr17 | 80707840 | 80710103 |
| chr17 | 80707840 | 80755040 |
| chr17 | 80730559 | 80732125 |
| chr17 | 81194995 | 81195834 |
| chr17 | 81270524 | 81271024 |
| chr17 | 81588932 | 81596242 |
| chr17 | 81588932 | 81597316 |
| chr17 | 81667728 | 81672768 |
| chr17 | 81667728 | 81672802 |
| chr17 | 81696356 | 81701717 |
| chr17 | 81696823 | 81701717 |
| chr17 | 81700466 | 81701717 |
| chr17 | 81889993 | 81890688 |
| chr17 | 81909055 | 81909513 |
| chr17 | 8204849  | 8206888  |
| chr17 | 8206490  | 8207901  |
| chr17 | 82082696 | 82082913 |
| chr17 | 82127691 | 82134194 |
| chr17 | 82166389 | 82172860 |
| chr17 | 82183773 | 82185303 |
| chr17 | 82265685 | 82266894 |
| chr17 | 82265685 | 82268760 |
| chr17 | 82394330 | 82407771 |
| chr17 | 82403936 | 82409730 |
| chr17 | 82449310 | 82450699 |
| chr17 | 8253879  | 8254301  |
| chr17 | 82655528 | 82659657 |
| chr17 | 82718905 | 82720841 |
| chr17 | 82720271 | 82720841 |
| chr17 | 82756164 | 82783714 |
| chr17 | 82763964 | 82783714 |
| chr17 | 82781588 | 82783714 |
| chr17 | 82876780 | 82889697 |
| chr17 | 8553954  | 8576831  |
| chr17 | 9162812  | 9164772  |
| chr17 | 9376576  | 9378653  |
| chr17 | 9378551  | 9391284  |
| chr18 | 12028042 | 12031098 |
| chr18 | 12506476 | 12563727 |
| chr18 | 12785735 | 12817365 |
| chr18 | 12794383 | 12862744 |
| chr18 | 12801969 | 12819091 |

|       |          |          |
|-------|----------|----------|
| chr18 | 12814202 | 12840950 |
| chr18 | 12999420 | 13002681 |
| chr18 | 12999424 | 13008631 |
| chr18 | 1358725  | 1361221  |
| chr18 | 1358725  | 1368597  |
| chr18 | 13666478 | 13682105 |
| chr18 | 14077328 | 14085076 |
| chr18 | 163307   | 167794   |
| chr18 | 21536041 | 21540700 |
| chr18 | 21539919 | 21540700 |
| chr18 | 21622724 | 21631378 |
| chr18 | 21761441 | 21779685 |
| chr18 | 21765771 | 21782763 |
| chr18 | 21791334 | 21804014 |
| chr18 | 23775753 | 23784157 |
| chr18 | 24019859 | 24083081 |
| chr18 | 24277789 | 24377535 |
| chr18 | 26018018 | 26078160 |
| chr18 | 26018018 | 26087577 |
| chr18 | 26389844 | 26394481 |
| chr18 | 26476514 | 26501245 |
| chr18 | 31637441 | 31666372 |
| chr18 | 31830870 | 31839457 |
| chr18 | 31870356 | 31890866 |
| chr18 | 31931328 | 31936456 |
| chr18 | 31931328 | 31942893 |
| chr18 | 32108866 | 32113860 |
| chr18 | 32111753 | 32118352 |
| chr18 | 32111753 | 32129327 |
| chr18 | 32111753 | 32135975 |
| chr18 | 3253232  | 3255962  |
| chr18 | 35654559 | 35692320 |
| chr18 | 35654559 | 35703643 |
| chr18 | 36142843 | 36159830 |
| chr18 | 36334396 | 36355645 |
| chr18 | 36353568 | 36355645 |
| chr18 | 36353568 | 36372744 |
| chr18 | 36355538 | 36412014 |
| chr18 | 36411898 | 36512543 |
| chr18 | 36834202 | 36844302 |
| chr18 | 36834202 | 36959435 |
| chr18 | 36954430 | 36959435 |
| chr18 | 36959315 | 37067545 |
| chr18 | 37066889 | 37084232 |
| chr18 | 37084124 | 37173081 |

|       |          |          |
|-------|----------|----------|
| chr18 | 37160176 | 37173081 |
| chr18 | 41351660 | 41501276 |
| chr18 | 41437370 | 41501276 |
| chr18 | 41501119 | 41525526 |
| chr18 | 41516419 | 41525526 |
| chr18 | 41955256 | 41962632 |
| chr18 | 46118180 | 46128837 |
| chr18 | 46118180 | 46129213 |
| chr18 | 46730205 | 46821072 |
| chr18 | 46775489 | 46821072 |
| chr18 | 46890579 | 46903635 |
| chr18 | 46946056 | 46946923 |
| chr18 | 47154798 | 47157537 |
| chr18 | 47829473 | 47870564 |
| chr18 | 47841517 | 47896809 |
| chr18 | 47841705 | 47896809 |
| chr18 | 47841791 | 47896809 |
| chr18 | 47865058 | 47930446 |
| chr18 | 47868051 | 47870564 |
| chr18 | 47889020 | 47896809 |
| chr18 | 48857587 | 48860429 |
| chr18 | 49249180 | 49258493 |
| chr18 | 49257009 | 49286613 |
| chr18 | 49272177 | 49286613 |
| chr18 | 49329572 | 49333853 |
| chr18 | 49329572 | 49379758 |
| chr18 | 49417842 | 49430447 |
| chr18 | 49491621 | 49491833 |
| chr18 | 49491625 | 49491833 |
| chr18 | 50382128 | 50392208 |
| chr18 | 51175894 | 51177576 |
| chr18 | 54166075 | 54187837 |
| chr18 | 54187713 | 54189011 |
| chr18 | 54187713 | 54205157 |
| chr18 | 54271359 | 54277853 |
| chr18 | 54277771 | 54287411 |
| chr18 | 54287280 | 54293915 |
| chr18 | 56672496 | 56673353 |
| chr18 | 56778439 | 56816144 |
| chr18 | 56918071 | 56939393 |
| chr18 | 57731626 | 57731832 |
| chr18 | 57731626 | 57761939 |
| chr18 | 57731626 | 57765361 |
| chr18 | 59466738 | 59471769 |
| chr18 | 6058537  | 6080951  |

|       |          |          |
|-------|----------|----------|
| chr18 | 61814606 | 61816598 |
| chr18 | 61816033 | 61816598 |
| chr18 | 6213148  | 6356783  |
| chr18 | 62282261 | 62287467 |
| chr18 | 62348112 | 62349937 |
| chr18 | 63350887 | 63386623 |
| chr18 | 68823365 | 68874785 |
| chr18 | 68836748 | 68897682 |
| chr18 | 68897218 | 68897682 |
| chr18 | 69010933 | 69054133 |
| chr18 | 705256   | 706578   |
| chr18 | 724312   | 756835   |
| chr18 | 74155144 | 74159912 |
| chr18 | 756556   | 787986   |
| chr18 | 76830675 | 76851939 |
| chr18 | 76849525 | 76855201 |
| chr18 | 76849621 | 76875664 |
| chr18 | 76862185 | 76875664 |
| chr18 | 7754372  | 7774271  |
| chr18 | 79933968 | 79935598 |
| chr18 | 8624937  | 8638416  |
| chr18 | 8714138  | 8720496  |
| chr18 | 8718423  | 8741134  |
| chr18 | 9158346  | 9221999  |
| chr18 | 9182026  | 9221999  |
| chr18 | 9208656  | 9239556  |
| chr18 | 9583116  | 9595238  |
| chr18 | 9924259  | 9931962  |
| chr18 | 9927095  | 9937066  |
| chr18 | 9927095  | 9950568  |
| chr18 | 9931809  | 9954160  |
| chr18 | 9936109  | 9938341  |
| chr19 | 10135438 | 10136287 |
| chr19 | 10155079 | 10155852 |
| chr19 | 10159657 | 10179982 |
| chr19 | 10224011 | 10224947 |
| chr19 | 1083290  | 1084346  |
| chr19 | 10869217 | 10869663 |
| chr19 | 1089570  | 1089883  |
| chr19 | 10984123 | 10987924 |
| chr19 | 10984373 | 10985242 |
| chr19 | 11056216 | 11060187 |
| chr19 | 11116858 | 11131795 |
| chr19 | 11123173 | 11131795 |
| chr19 | 11147817 | 11148113 |

|       |          |          |
|-------|----------|----------|
| chr19 | 1116947  | 1117322  |
| chr19 | 11415946 | 11417059 |
| chr19 | 11682545 | 11685260 |
| chr19 | 11722953 | 11725327 |
| chr19 | 11913408 | 11915672 |
| chr19 | 12043639 | 12045209 |
| chr19 | 12075311 | 12077637 |
| chr19 | 12110304 | 12111719 |
| chr19 | 12110304 | 12147834 |
| chr19 | 12111245 | 12111719 |
| chr19 | 12145257 | 12146224 |
| chr19 | 12162661 | 12163206 |
| chr19 | 1216267  | 1219413  |
| chr19 | 12185784 | 12188058 |
| chr19 | 12194705 | 12195143 |
| chr19 | 12349612 | 12352070 |
| chr19 | 12349612 | 12353114 |
| chr19 | 12391802 | 12466850 |
| chr19 | 12431576 | 12433197 |
| chr19 | 12517744 | 12528696 |
| chr19 | 12526919 | 12528696 |
| chr19 | 12703713 | 12705797 |
| chr19 | 12714820 | 12715710 |
| chr19 | 12813082 | 12813565 |
| chr19 | 12876179 | 12878579 |
| chr19 | 12928337 | 12928847 |
| chr19 | 12928341 | 12928932 |
| chr19 | 12928341 | 12928936 |
| chr19 | 12954139 | 12954526 |
| chr19 | 13090298 | 13095729 |
| chr19 | 13094634 | 13095729 |
| chr19 | 13104891 | 13105606 |
| chr19 | 13817169 | 13819492 |
| chr19 | 13993524 | 13998317 |
| chr19 | 14177530 | 14189689 |
| chr19 | 1510149  | 1510917  |
| chr19 | 15272814 | 15275842 |
| chr19 | 15272814 | 15297942 |
| chr19 | 16080914 | 16082046 |
| chr19 | 16081912 | 16101409 |
| chr19 | 16403732 | 16404714 |
| chr19 | 16509149 | 16509988 |
| chr19 | 16528079 | 16529753 |
| chr19 | 16647119 | 16654125 |
| chr19 | 16652604 | 16654125 |

|       |          |          |
|-------|----------|----------|
| chr19 | 17058106 | 17062779 |
| chr19 | 17276494 | 17277479 |
| chr19 | 17557322 | 17559421 |
| chr19 | 17733192 | 17734416 |
| chr19 | 18564868 | 18565190 |
| chr19 | 18567131 | 18567584 |
| chr19 | 18574869 | 18575141 |
| chr19 | 19007346 | 19008428 |
| chr19 | 19070342 | 19106385 |
| chr19 | 1918888  | 1919442  |
| chr19 | 19316617 | 19320462 |
| chr19 | 19436130 | 19465614 |
| chr19 | 19456921 | 19465614 |
| chr19 | 19457006 | 19465614 |
| chr19 | 19465339 | 19474118 |
| chr19 | 19474032 | 19492712 |
| chr19 | 19585199 | 19599365 |
| chr19 | 19588085 | 19599365 |
| chr19 | 19592505 | 19599365 |
| chr19 | 19677863 | 19680007 |
| chr19 | 19677863 | 19680187 |
| chr19 | 19915279 | 19933302 |
| chr19 | 19916559 | 19933302 |
| chr19 | 20934948 | 20937361 |
| chr19 | 21062605 | 21098910 |
| chr19 | 2109228  | 2109872  |
| chr19 | 2109253  | 2109872  |
| chr19 | 23932342 | 23943589 |
| chr19 | 24105939 | 24108043 |
| chr19 | 29980158 | 29986417 |
| chr19 | 29980158 | 30012531 |
| chr19 | 31276331 | 31279752 |
| chr19 | 3206261  | 3207747  |
| chr19 | 32382466 | 32386721 |
| chr19 | 32432680 | 32439910 |
| chr19 | 32709184 | 32711905 |
| chr19 | 32878127 | 32882013 |
| chr19 | 32878139 | 32879378 |
| chr19 | 32878143 | 32882013 |
| chr19 | 32879067 | 32882013 |
| chr19 | 32891954 | 32899998 |
| chr19 | 32973183 | 32976678 |
| chr19 | 33002424 | 33002812 |
| chr19 | 33798263 | 33798766 |
| chr19 | 33798263 | 33811552 |

|       |          |          |
|-------|----------|----------|
| chr19 | 34178221 | 34209051 |
| chr19 | 34178221 | 34219877 |
| chr19 | 34446043 | 34467014 |
| chr19 | 35270758 | 35279074 |
| chr19 | 35729296 | 35729945 |
| chr19 | 35737263 | 35737599 |
| chr19 | 3620294  | 3620706  |
| chr19 | 3620296  | 3620706  |
| chr19 | 36449230 | 36450001 |
| chr19 | 36449398 | 36450001 |
| chr19 | 36449398 | 36476616 |
| chr19 | 36823730 | 36827849 |
| chr19 | 37089038 | 37096115 |
| chr19 | 37347189 | 37359546 |
| chr19 | 37425867 | 37429808 |
| chr19 | 37580728 | 37586745 |
| chr19 | 37738147 | 37740194 |
| chr19 | 37738902 | 37740194 |
| chr19 | 37738902 | 37759139 |
| chr19 | 37760189 | 37771696 |
| chr19 | 38002458 | 38029156 |
| chr19 | 38008095 | 38029156 |
| chr19 | 38028269 | 38029156 |
| chr19 | 38697027 | 38701121 |
| chr19 | 38697027 | 38709476 |
| chr19 | 38845616 | 38846090 |
| chr19 | 38845628 | 38847434 |
| chr19 | 39169757 | 39172916 |
| chr19 | 39354005 | 39357409 |
| chr19 | 39453355 | 39454325 |
| chr19 | 3979454  | 3979807  |
| chr19 | 3983313  | 3984135  |
| chr19 | 40048669 | 40049056 |
| chr19 | 40068672 | 40081914 |
| chr19 | 40197876 | 40198555 |
| chr19 | 41220858 | 41221107 |
| chr19 | 41221615 | 41256611 |
| chr19 | 41243274 | 41243707 |
| chr19 | 41248513 | 41248839 |
| chr19 | 41248513 | 41248948 |
| chr19 | 41276158 | 41276525 |
| chr19 | 43186341 | 43203973 |
| chr19 | 43506722 | 43508060 |
| chr19 | 43560909 | 43561544 |
| chr19 | 43655418 | 43656640 |



|       |          |          |
|-------|----------|----------|
| chr19 | 43656478 | 43658597 |
| chr19 | 4365657  | 4366500  |
| chr19 | 43880009 | 43884051 |
| chr19 | 43924237 | 43931365 |
| chr19 | 43925324 | 43930000 |
| chr19 | 44007010 | 44010397 |
| chr19 | 44076321 | 44085803 |
| chr19 | 4408902  | 4410523  |
| chr19 | 44264313 | 44289704 |
| chr19 | 44429057 | 44432366 |
| chr19 | 44657761 | 44662398 |
| chr19 | 45011935 | 45012276 |
| chr19 | 45686533 | 45687727 |
| chr19 | 45686533 | 45688566 |
| chr19 | 45702903 | 45703294 |
| chr19 | 45791121 | 45792315 |
| chr19 | 45821531 | 45822755 |
| chr19 | 46375612 | 46376574 |
| chr19 | 46605826 | 46608140 |
| chr19 | 46838053 | 46846142 |
| chr19 | 46845992 | 46846824 |
| chr19 | 46918487 | 46989675 |
| chr19 | 46937263 | 46938154 |
| chr19 | 47270406 | 47273406 |
| chr19 | 47492145 | 47492960 |
| chr19 | 47670442 | 47757148 |
| chr19 | 47746966 | 47757148 |
| chr19 | 48211504 | 48215384 |
| chr19 | 48231659 | 48242644 |
| chr19 | 48831427 | 48831759 |
| chr19 | 48918784 | 48919004 |
| chr19 | 48999318 | 48999833 |
| chr19 | 49135778 | 49136122 |
| chr19 | 49341020 | 49360081 |
| chr19 | 49341335 | 49360081 |
| chr19 | 49496471 | 49497168 |
| chr19 | 49678065 | 49686726 |
| chr19 | 49844315 | 49844598 |
| chr19 | 49864438 | 49865126 |
| chr19 | 50061799 | 50067800 |
| chr19 | 50216184 | 50217771 |
| chr19 | 5047475  | 5050463  |
| chr19 | 51573209 | 51581882 |
| chr19 | 51811472 | 51886912 |
| chr19 | 51839892 | 51880877 |

|       |          |          |
|-------|----------|----------|
| chr19 | 51839892 | 51886912 |
| chr19 | 51948204 | 51949235 |
| chr19 | 51948592 | 51949235 |
| chr19 | 51965512 | 51966214 |
| chr19 | 52021543 | 52025961 |
| chr19 | 52123922 | 52125781 |
| chr19 | 52282110 | 52290167 |
| chr19 | 52408225 | 52435209 |
| chr19 | 52574076 | 52584197 |
| chr19 | 52603422 | 52635153 |
| chr19 | 52652357 | 52660843 |
| chr19 | 52655560 | 52670951 |
| chr19 | 52728729 | 52735276 |
| chr19 | 53404473 | 53486758 |
| chr19 | 53407697 | 53409438 |
| chr19 | 53446226 | 53460952 |
| chr19 | 53521855 | 53522684 |
| chr19 | 53521855 | 53555908 |
| chr19 | 54153840 | 54155286 |
| chr19 | 54207397 | 54207872 |
| chr19 | 55404060 | 55404478 |
| chr19 | 55613592 | 55617470 |
| chr19 | 55663605 | 55675435 |
| chr19 | 56190836 | 56222326 |
| chr19 | 56449556 | 56462429 |
| chr19 | 56494162 | 56500247 |
| chr19 | 5711420  | 5712002  |
| chr19 | 5715971  | 5729944  |
| chr19 | 57543264 | 57543650 |
| chr19 | 57619411 | 57621493 |
| chr19 | 57776542 | 57780146 |
| chr19 | 57778750 | 57780146 |
| chr19 | 57868457 | 57877042 |
| chr19 | 5787378  | 5787588  |
| chr19 | 5787380  | 5787588  |
| chr19 | 57876915 | 57889008 |
| chr19 | 57876915 | 57922500 |
| chr19 | 5790364  | 5791043  |
| chr19 | 57923191 | 57930557 |
| chr19 | 57925622 | 57930557 |
| chr19 | 58142213 | 58142661 |
| chr19 | 58260850 | 58263271 |
| chr19 | 58294097 | 58295581 |
| chr19 | 58556403 | 58556686 |
| chr19 | 5950716  | 5951596  |

|       |           |           |
|-------|-----------|-----------|
| chr19 | 6230379   | 6270759   |
| chr19 | 6230594   | 6270759   |
| chr19 | 6258327   | 6262310   |
| chr19 | 7082877   | 7084277   |
| chr19 | 7440188   | 7447168   |
| chr19 | 7627229   | 7628298   |
| chr19 | 8337794   | 8339167   |
| chr19 | 8368043   | 8369332   |
| chr19 | 8455404   | 8466448   |
| chr19 | 852875    | 861956    |
| chr19 | 897508    | 902130    |
| chr19 | 9156748   | 9157241   |
| chr19 | 9337795   | 9343784   |
| chr19 | 9338493   | 9343784   |
| chr19 | 9341101   | 9343784   |
| chr19 | 9350803   | 9364948   |
| chr19 | 9566088   | 9568175   |
| chr19 | 9566335   | 9568175   |
| chr19 | 9566335   | 9569082   |
| chr19 | 9632227   | 9645189   |
| chr19 | 9652952   | 9653881   |
| chr19 | 9652952   | 9656653   |
| chr19 | 9652952   | 9660874   |
| chr19 | 9658224   | 9693820   |
| chr1  | 100007033 | 100043229 |
| chr1  | 100007033 | 100050004 |
| chr1  | 100043072 | 100061949 |
| chr1  | 10007569  | 10008379  |
| chr1  | 100121377 | 100123977 |
| chr1  | 100140844 | 100144143 |
| chr1  | 100283628 | 100285322 |
| chr1  | 100888752 | 100895528 |
| chr1  | 10232249  | 10235016  |
| chr1  | 10320042  | 10376676  |
| chr1  | 10360928  | 10381641  |
| chr1  | 10433843  | 10442441  |
| chr1  | 1053977   | 1054420   |
| chr1  | 10597591  | 10599366  |
| chr1  | 108718788 | 108798237 |
| chr1  | 108882475 | 108885578 |
| chr1  | 108914337 | 108929975 |
| chr1  | 108947337 | 108950448 |
| chr1  | 108947610 | 108962469 |
| chr1  | 109236804 | 109237373 |
| chr1  | 109281288 | 109281618 |

|      |           |           |
|------|-----------|-----------|
| chr1 | 109344165 | 109345878 |
| chr1 | 11013715  | 11025208  |
| chr1 | 11107404  | 11130777  |
| chr1 | 111147641 | 111153371 |
| chr1 | 111147641 | 111184280 |
| chr1 | 11121094  | 11122126  |
| chr1 | 111454210 | 111468259 |
| chr1 | 1116059   | 1267992   |
| chr1 | 111727366 | 111727804 |
| chr1 | 112411703 | 112416264 |
| chr1 | 112596835 | 112600848 |
| chr1 | 112616812 | 112618369 |
| chr1 | 112690098 | 112691622 |
| chr1 | 112912178 | 112960575 |
| chr1 | 112913873 | 112929352 |
| chr1 | 112921989 | 112939491 |
| chr1 | 113093205 | 113103785 |
| chr1 | 113544664 | 113622994 |
| chr1 | 113622920 | 113646642 |
| chr1 | 113705889 | 113758733 |
| chr1 | 113710253 | 113747014 |
| chr1 | 113724758 | 113758733 |
| chr1 | 114456212 | 114463556 |
| chr1 | 114461053 | 114464388 |
| chr1 | 114463103 | 114477087 |
| chr1 | 114726210 | 114749904 |
| chr1 | 117086416 | 117086781 |
| chr1 | 117396951 | 117405645 |
| chr1 | 117402185 | 117442335 |
| chr1 | 117402185 | 117467772 |
| chr1 | 117456084 | 117466427 |
| chr1 | 117460488 | 117522937 |
| chr1 | 117493146 | 117522937 |
| chr1 | 117870395 | 117920424 |
| chr1 | 119026814 | 119045662 |
| chr1 | 119178643 | 119181461 |
| chr1 | 121280749 | 121284995 |
| chr1 | 12299201  | 12308604  |
| chr1 | 12572727  | 12617303  |
| chr1 | 1267861   | 1271637   |
| chr1 | 143974543 | 144068326 |
| chr1 | 144955438 | 144960398 |
| chr1 | 145405097 | 145420756 |
| chr1 | 145771710 | 145794196 |
| chr1 | 145839889 | 145842477 |

|      |           |           |
|------|-----------|-----------|
| chr1 | 1459160   | 1525291   |
| chr1 | 145936483 | 145937699 |
| chr1 | 1468383   | 1529331   |
| chr1 | 147272381 | 147294517 |
| chr1 | 1477273   | 1477939   |
| chr1 | 148135885 | 148137809 |
| chr1 | 1482137   | 1518990   |
| chr1 | 1482544   | 1520306   |
| chr1 | 148433523 | 148436564 |
| chr1 | 1485015   | 1520306   |
| chr1 | 150408905 | 150417725 |
| chr1 | 150648667 | 150663763 |
| chr1 | 150929397 | 150941428 |
| chr1 | 150966161 | 150969091 |
| chr1 | 151117391 | 151118139 |
| chr1 | 151239954 | 151240259 |
| chr1 | 151262160 | 151267339 |
| chr1 | 151265165 | 151267339 |
| chr1 | 151440927 | 151451050 |
| chr1 | 151638887 | 151699485 |
| chr1 | 151982665 | 151986251 |
| chr1 | 152314905 | 152341210 |
| chr1 | 152327271 | 152335439 |
| chr1 | 153665167 | 153668557 |
| chr1 | 153982354 | 153982534 |
| chr1 | 153983218 | 153986294 |
| chr1 | 153991223 | 153991510 |
| chr1 | 1541813   | 1542167   |
| chr1 | 154225083 | 154241797 |
| chr1 | 154254089 | 154254812 |
| chr1 | 154987465 | 154990528 |
| chr1 | 155215053 | 155235311 |
| chr1 | 155216383 | 155236469 |
| chr1 | 155251501 | 155254722 |
| chr1 | 155337588 | 155415923 |
| chr1 | 155343313 | 155404350 |
| chr1 | 155370503 | 155462599 |
| chr1 | 155408141 | 155415923 |
| chr1 | 155415743 | 155424672 |
| chr1 | 155415743 | 155440593 |
| chr1 | 155415743 | 155477958 |
| chr1 | 155438326 | 155462599 |
| chr1 | 155438326 | 155477958 |
| chr1 | 155612420 | 155747896 |
| chr1 | 155674684 | 155675096 |

|      |           |           |
|------|-----------|-----------|
| chr1 | 155674684 | 155679512 |
| chr1 | 155676551 | 155679512 |
| chr1 | 155900315 | 155910804 |
| chr1 | 156018131 | 156018368 |
| chr1 | 1561331   | 1564916   |
| chr1 | 156207885 | 156210427 |
| chr1 | 15638306  | 15646984  |
| chr1 | 15643521  | 15646984  |
| chr1 | 15643521  | 15660190  |
| chr1 | 1564486   | 1564916   |
| chr1 | 1564604   | 1564916   |
| chr1 | 156743651 | 156746433 |
| chr1 | 156951572 | 157044499 |
| chr1 | 15776946  | 15777287  |
| chr1 | 158073806 | 158076262 |
| chr1 | 158077990 | 158078507 |
| chr1 | 159918762 | 159920537 |
| chr1 | 159918841 | 159920537 |
| chr1 | 160222598 | 160261358 |
| chr1 | 160290136 | 160299264 |
| chr1 | 160316218 | 160332557 |
| chr1 | 160317199 | 160332557 |
| chr1 | 161021009 | 161100859 |
| chr1 | 161791407 | 161871061 |
| chr1 | 162365403 | 162367204 |
| chr1 | 16255710  | 16316571  |
| chr1 | 16255710  | 16328849  |
| chr1 | 162566011 | 162568386 |
| chr1 | 162566011 | 162655374 |
| chr1 | 162576776 | 162599355 |
| chr1 | 162576776 | 162600903 |
| chr1 | 162576776 | 162601514 |
| chr1 | 162576776 | 162655374 |
| chr1 | 162579527 | 162597858 |
| chr1 | 162587474 | 162600903 |
| chr1 | 162590322 | 162601514 |
| chr1 | 162597791 | 162601514 |
| chr1 | 162597791 | 162655374 |
| chr1 | 162599270 | 162601514 |
| chr1 | 16294782  | 16316568  |
| chr1 | 16294782  | 16316571  |
| chr1 | 16305802  | 16316571  |
| chr1 | 16305802  | 16316727  |
| chr1 | 1637761   | 1704655   |
| chr1 | 16484822  | 16631109  |

|      |           |           |
|------|-----------|-----------|
| chr1 | 16625774  | 16633346  |
| chr1 | 16625774  | 16635168  |
| chr1 | 16630889  | 16633346  |
| chr1 | 16630889  | 16635168  |
| chr1 | 166848937 | 166852772 |
| chr1 | 1669663   | 1734835   |
| chr1 | 167332469 | 167338258 |
| chr1 | 167744902 | 167776166 |
| chr1 | 167765582 | 167769135 |
| chr1 | 167765582 | 167788019 |
| chr1 | 167765582 | 167788137 |
| chr1 | 167772274 | 167788019 |
| chr1 | 167772274 | 167788137 |
| chr1 | 167987494 | 168019667 |
| chr1 | 168019544 | 168023047 |
| chr1 | 168028425 | 168038488 |
| chr1 | 168231513 | 168242987 |
| chr1 | 168231513 | 168243069 |
| chr1 | 168231513 | 168243093 |
| chr1 | 168235100 | 168243069 |
| chr1 | 168235100 | 168243093 |
| chr1 | 168239130 | 168293278 |
| chr1 | 1692448   | 1739704   |
| chr1 | 169319158 | 169324500 |
| chr1 | 169377137 | 169378529 |
| chr1 | 169451132 | 169477757 |
| chr1 | 169476414 | 169477757 |
| chr1 | 169836926 | 169850327 |
| chr1 | 169862612 | 169869128 |
| chr1 | 169978084 | 170031975 |
| chr1 | 171485685 | 171517814 |
| chr1 | 171579353 | 171584541 |
| chr1 | 172038318 | 172055926 |
| chr1 | 172442848 | 172443987 |
| chr1 | 173460377 | 173462454 |
| chr1 | 173785162 | 173787962 |
| chr1 | 173800248 | 173803505 |
| chr1 | 173830254 | 173830761 |
| chr1 | 173864745 | 173865228 |
| chr1 | 173866230 | 173866527 |
| chr1 | 173941264 | 173943708 |
| chr1 | 173946475 | 173993135 |
| chr1 | 173970504 | 173993135 |
| chr1 | 173978487 | 173993135 |
| chr1 | 173992754 | 173993135 |

|      |           |           |
|------|-----------|-----------|
| chr1 | 17408979  | 17422836  |
| chr1 | 174250569 | 174278779 |
| chr1 | 174800327 | 174811960 |
| chr1 | 175014672 | 175018576 |
| chr1 | 176081151 | 176144100 |
| chr1 | 176144004 | 176163891 |
| chr1 | 176461053 | 176463418 |
| chr1 | 1779904   | 1825482   |
| chr1 | 178123047 | 178300118 |
| chr1 | 178386993 | 178390206 |
| chr1 | 178737107 | 178833550 |
| chr1 | 179101711 | 179133374 |
| chr1 | 179846106 | 179852811 |
| chr1 | 179856057 | 179865854 |
| chr1 | 180033950 | 180041802 |
| chr1 | 180273337 | 180284248 |
| chr1 | 180397515 | 180424223 |
| chr1 | 1804418   | 1879902   |
| chr1 | 180976117 | 180993425 |
| chr1 | 1815755   | 1825482   |
| chr1 | 1815755   | 1853297   |
| chr1 | 1815755   | 1879902   |
| chr1 | 1817836   | 1853297   |
| chr1 | 1825396   | 1848036   |
| chr1 | 1825396   | 1879902   |
| chr1 | 183697402 | 183757273 |
| chr1 | 1839189   | 1853297   |
| chr1 | 1839189   | 1879902   |
| chr1 | 184477464 | 184507682 |
| chr1 | 186406082 | 186411893 |
| chr1 | 186406082 | 186419077 |
| chr1 | 186451178 | 186470395 |
| chr1 | 187161748 | 187329060 |
| chr1 | 187167865 | 187329060 |
| chr1 | 187254972 | 187329060 |
| chr1 | 187269395 | 187329060 |
| chr1 | 187294159 | 187329060 |
| chr1 | 187303465 | 187443726 |
| chr1 | 187324092 | 187329060 |
| chr1 | 18908569  | 18921121  |
| chr1 | 19201840  | 19210072  |
| chr1 | 193069033 | 193070662 |
| chr1 | 193096647 | 193101204 |
| chr1 | 19385140  | 19385626  |
| chr1 | 197117788 | 197146594 |



|      |           |           |
|------|-----------|-----------|
| chr1 | 19770541  | 19790048  |
| chr1 | 197732378 | 197735796 |
| chr1 | 198220998 | 198264235 |
| chr1 | 19890384  | 19907876  |
| chr1 | 19904266  | 19907660  |
| chr1 | 200368664 | 200374246 |
| chr1 | 200368664 | 200379537 |
| chr1 | 202411617 | 202428929 |
| chr1 | 202448988 | 202502005 |
| chr1 | 204112914 | 204126015 |
| chr1 | 205098988 | 205101690 |
| chr1 | 205161257 | 205170924 |
| chr1 | 205616477 | 205619073 |
| chr1 | 205616477 | 205620838 |
| chr1 | 205616477 | 205623891 |
| chr1 | 20648314  | 20649353  |
| chr1 | 20744743  | 20749882  |
| chr1 | 20744743  | 20757256  |
| chr1 | 20744743  | 20773610  |
| chr1 | 20744743  | 20780540  |
| chr1 | 20749722  | 20749975  |
| chr1 | 20853559  | 20857442  |
| chr1 | 20879281  | 20895501  |
| chr1 | 20879281  | 20942330  |
| chr1 | 20892618  | 20950111  |
| chr1 | 20941258  | 20942330  |
| chr1 | 21001198  | 21002808  |
| chr1 | 21001198  | 21050994  |
| chr1 | 21001198  | 21089213  |
| chr1 | 21001198  | 21111383  |
| chr1 | 21046958  | 21050994  |
| chr1 | 21046958  | 21111383  |
| chr1 | 21050865  | 21134034  |
| chr1 | 210919639 | 210920967 |
| chr1 | 21098214  | 21111383  |
| chr1 | 21105116  | 21111383  |
| chr1 | 211266864 | 211274262 |
| chr1 | 211422538 | 211426283 |
| chr1 | 212100251 | 212102952 |
| chr1 | 212325982 | 212345933 |
| chr1 | 21272698  | 21320960  |
| chr1 | 212738447 | 212739601 |
| chr1 | 212782371 | 212791475 |
| chr1 | 212872677 | 212895354 |
| chr1 | 213061381 | 213077816 |

|      |           |           |
|------|-----------|-----------|
| chr1 | 213077695 | 213088030 |
| chr1 | 213077695 | 213142801 |
| chr1 | 213205238 | 213230544 |
| chr1 | 2144209   | 2145511   |
| chr1 | 214451804 | 214551278 |
| chr1 | 214655240 | 214663780 |
| chr1 | 2150789   | 2157316   |
| chr1 | 21695065  | 21721163  |
| chr1 | 21715388  | 21721737  |
| chr1 | 219179146 | 219211752 |
| chr1 | 219193081 | 219211752 |
| chr1 | 219193081 | 219218712 |
| chr1 | 219193081 | 219241308 |
| chr1 | 219193081 | 219316005 |
| chr1 | 219193129 | 219218712 |
| chr1 | 219193129 | 219241308 |
| chr1 | 220195082 | 220196398 |
| chr1 | 220761657 | 220770556 |
| chr1 | 22078428  | 22091501  |
| chr1 | 22081721  | 22091501  |
| chr1 | 223954476 | 223962273 |
| chr1 | 223954476 | 223962708 |
| chr1 | 224267003 | 224268133 |
| chr1 | 224365878 | 224377177 |
| chr1 | 224411426 | 224413335 |
| chr1 | 22490525  | 22491533  |
| chr1 | 224952669 | 224967514 |
| chr1 | 224952669 | 224980270 |
| chr1 | 224952669 | 224999440 |
| chr1 | 224952673 | 224974153 |
| chr1 | 224952684 | 225007544 |
| chr1 | 224980143 | 225097239 |
| chr1 | 225002782 | 225123614 |
| chr1 | 225023614 | 225058172 |
| chr1 | 225072754 | 225097239 |
| chr1 | 225080561 | 225097239 |
| chr1 | 225117683 | 225123614 |
| chr1 | 225123526 | 225185425 |
| chr1 | 225144521 | 225185425 |
| chr1 | 225159313 | 225185425 |
| chr1 | 22517464  | 22520002  |
| chr1 | 225270734 | 225276081 |
| chr1 | 225921207 | 225923388 |
| chr1 | 227040130 | 227051985 |
| chr1 | 227139575 | 227317246 |

|      |           |           |
|------|-----------|-----------|
| chr1 | 227160542 | 227317246 |
| chr1 | 227193785 | 227317196 |
| chr1 | 227193785 | 227317246 |
| chr1 | 227213135 | 227317246 |
| chr1 | 227254063 | 227317246 |
| chr1 | 228097077 | 228098184 |
| chr1 | 228292522 | 228304468 |
| chr1 | 228394736 | 228395252 |
| chr1 | 229286485 | 229304000 |
| chr1 | 229286485 | 229313760 |
| chr1 | 229497683 | 229498306 |
| chr1 | 229518840 | 229556947 |
| chr1 | 229525935 | 229549584 |
| chr1 | 229538813 | 229542371 |
| chr1 | 229538813 | 229549434 |
| chr1 | 230226828 | 230236725 |
| chr1 | 23030468  | 23040434  |
| chr1 | 230839855 | 230843896 |
| chr1 | 231247306 | 231251143 |
| chr1 | 231364326 | 231367636 |
| chr1 | 231364326 | 231374099 |
| chr1 | 231749925 | 231774817 |
| chr1 | 232513856 | 232515608 |
| chr1 | 232513856 | 232533583 |
| chr1 | 233013216 | 233057290 |
| chr1 | 233090060 | 233112966 |
| chr1 | 233095754 | 233155812 |
| chr1 | 233112798 | 233161363 |
| chr1 | 233112798 | 233179175 |
| chr1 | 233112844 | 233161363 |
| chr1 | 233125458 | 233139855 |
| chr1 | 233125458 | 233208689 |
| chr1 | 233135012 | 233208610 |
| chr1 | 233177801 | 233208610 |
| chr1 | 233198938 | 233208610 |
| chr1 | 233236255 | 233236980 |
| chr1 | 23333517  | 23341020  |
| chr1 | 23333517  | 23341038  |
| chr1 | 234229678 | 234231741 |
| chr1 | 234391073 | 234391745 |
| chr1 | 234418083 | 234452875 |
| chr1 | 234606957 | 234607852 |
| chr1 | 235341707 | 235342883 |
| chr1 | 235341707 | 235427239 |
| chr1 | 235465635 | 235496308 |

|      |           |           |
|------|-----------|-----------|
| chr1 | 236168705 | 236185478 |
| chr1 | 236183777 | 236194796 |
| chr1 | 236803404 | 236806233 |
| chr1 | 236803430 | 236816543 |
| chr1 | 236806143 | 236807726 |
| chr1 | 23694791  | 23695774  |
| chr1 | 2393207   | 2399514   |
| chr1 | 2393269   | 2397220   |
| chr1 | 2393269   | 2402342   |
| chr1 | 2395783   | 2403589   |
| chr1 | 23967501  | 23972012  |
| chr1 | 239811120 | 239827378 |
| chr1 | 239826852 | 239827378 |
| chr1 | 240121572 | 240123345 |
| chr1 | 240123178 | 240137802 |
| chr1 | 240123178 | 240140496 |
| chr1 | 240140358 | 240188262 |
| chr1 | 240150187 | 240188262 |
| chr1 | 240158139 | 240211235 |
| chr1 | 240158139 | 240294883 |
| chr1 | 240163121 | 240178068 |
| chr1 | 240165688 | 240178068 |
| chr1 | 240165688 | 240211235 |
| chr1 | 240171269 | 240188262 |
| chr1 | 240177920 | 240234450 |
| chr1 | 240177920 | 240258596 |
| chr1 | 240186914 | 240211235 |
| chr1 | 240206798 | 240215851 |
| chr1 | 240355815 | 240414448 |
| chr1 | 240414332 | 240438210 |
| chr1 | 241850408 | 241869209 |
| chr1 | 241885313 | 241897032 |
| chr1 | 243270091 | 243286397 |
| chr1 | 243270091 | 243308177 |
| chr1 | 243660074 | 243843282 |
| chr1 | 243693666 | 243843282 |
| chr1 | 244408711 | 244416078 |
| chr1 | 244409484 | 244437768 |
| chr1 | 244476156 | 244479784 |
| chr1 | 244845246 | 244856158 |
| chr1 | 244845246 | 244862730 |
| chr1 | 245002120 | 245022296 |
| chr1 | 245017241 | 245028034 |
| chr1 | 245915319 | 245915640 |
| chr1 | 246274304 | 246327337 |

|      |           |           |
|------|-----------|-----------|
| chr1 | 246327200 | 246390206 |
| chr1 | 246327200 | 246440124 |
| chr1 | 246540937 | 246551302 |
| chr1 | 246618257 | 246634587 |
| chr1 | 246627355 | 246631924 |
| chr1 | 246726891 | 246780583 |
| chr1 | 246735974 | 246736550 |
| chr1 | 246748796 | 246758356 |
| chr1 | 247138715 | 247159813 |
| chr1 | 247155565 | 247159813 |
| chr1 | 247156405 | 247159813 |
| chr1 | 247156999 | 247159813 |
| chr1 | 247157083 | 247159813 |
| chr1 | 247860616 | 247896195 |
| chr1 | 247864704 | 247876037 |
| chr1 | 25458390  | 25468563  |
| chr1 | 26170417  | 26171365  |
| chr1 | 26237831  | 26244318  |
| chr1 | 26442707  | 26447660  |
| chr1 | 26446315  | 26447682  |
| chr1 | 26474135  | 26474547  |
| chr1 | 26848607  | 26853825  |
| chr1 | 27113790  | 27114286  |
| chr1 | 27303620  | 27306272  |
| chr1 | 28032348  | 28035680  |
| chr1 | 28214939  | 28234492  |
| chr1 | 28272317  | 28272793  |
| chr1 | 28407409  | 28408135  |
| chr1 | 28407409  | 28409039  |
| chr1 | 28459084  | 28466535  |
| chr1 | 28476111  | 28480604  |
| chr1 | 28553639  | 28564985  |
| chr1 | 28580673  | 28581110  |
| chr1 | 28683582  | 28683976  |
| chr1 | 29031787  | 29039426  |
| chr1 | 29044194  | 29053312  |
| chr1 | 29148079  | 29154910  |
| chr1 | 29148079  | 29159486  |
| chr1 | 29148566  | 29154910  |
| chr1 | 29154443  | 29154910  |
| chr1 | 30988308  | 30992660  |
| chr1 | 30992389  | 31007099  |
| chr1 | 31005852  | 31007099  |
| chr1 | 31005852  | 31015973  |
| chr1 | 31005852  | 31019509  |

|      |          |          |
|------|----------|----------|
| chr1 | 31055312 | 31059577 |
| chr1 | 31059298 | 31059577 |
| chr1 | 31907660 | 31911826 |
| chr1 | 31907660 | 31919658 |
| chr1 | 31911695 | 31931142 |
| chr1 | 31915890 | 31919658 |
| chr1 | 31915894 | 31931142 |
| chr1 | 32030297 | 32033399 |
| chr1 | 32184524 | 32188148 |
| chr1 | 32187581 | 32188124 |
| chr1 | 32296389 | 32302733 |
| chr1 | 32553458 | 32557965 |
| chr1 | 32595053 | 32600415 |
| chr1 | 32657426 | 32660694 |
| chr1 | 32657426 | 32662337 |
| chr1 | 32668224 | 32680614 |
| chr1 | 33330070 | 33335359 |
| chr1 | 33491702 | 33493159 |
| chr1 | 35093913 | 35113181 |
| chr1 | 35358924 | 35362266 |
| chr1 | 35381260 | 35408159 |
| chr1 | 35451523 | 35460437 |
| chr1 | 35901473 | 35902329 |
| chr1 | 35938437 | 35973511 |
| chr1 | 35972023 | 35984548 |
| chr1 | 36258665 | 36259484 |
| chr1 | 36259381 | 36272894 |
| chr1 | 36358238 | 36362656 |
| chr1 | 36361220 | 36362656 |
| chr1 | 37452239 | 37455912 |
| chr1 | 37537671 | 37538012 |
| chr1 | 37537671 | 37540755 |
| chr1 | 37540156 | 37554242 |
| chr1 | 37587310 | 37589082 |
| chr1 | 3780637  | 3785203  |
| chr1 | 3781150  | 3781601  |
| chr1 | 3783769  | 3785203  |
| chr1 | 37866458 | 37874088 |
| chr1 | 37930457 | 37932053 |
| chr1 | 38997881 | 39001106 |
| chr1 | 39361001 | 39361338 |
| chr1 | 39741365 | 39748767 |
| chr1 | 39844100 | 39854155 |
| chr1 | 39850118 | 39852951 |
| chr1 | 39850122 | 39857417 |

|      |          |          |
|------|----------|----------|
| chr1 | 39853969 | 39862935 |
| chr1 | 39957090 | 39958825 |
| chr1 | 40070158 | 40071079 |
| chr1 | 40227412 | 40231658 |
| chr1 | 40259349 | 40260985 |
| chr1 | 40260838 | 40262983 |
| chr1 | 41070594 | 41071973 |
| chr1 | 41105741 | 41117010 |
| chr1 | 41113282 | 41162979 |
| chr1 | 41142873 | 41186250 |
| chr1 | 41186120 | 41192900 |
| chr1 | 41628748 | 41646243 |
| chr1 | 42227882 | 42278784 |
| chr1 | 42265114 | 42278784 |
| chr1 | 42773562 | 42775479 |
| chr1 | 42773562 | 42775522 |
| chr1 | 42773562 | 42782736 |
| chr1 | 42789795 | 42794613 |
| chr1 | 43447861 | 43452013 |
| chr1 | 43604189 | 43604880 |
| chr1 | 43792101 | 43792925 |
| chr1 | 43831654 | 43838311 |
| chr1 | 43858134 | 43858636 |
| chr1 | 43920403 | 43921638 |
| chr1 | 44241914 | 44248038 |
| chr1 | 44410583 | 44412722 |
| chr1 | 44753254 | 44753699 |
| chr1 | 44777613 | 44778717 |
| chr1 | 45334390 | 45334967 |
| chr1 | 45457563 | 45460492 |
| chr1 | 45600384 | 45602365 |
| chr1 | 45634095 | 45660377 |
| chr1 | 45824432 | 45834766 |
| chr1 | 45911039 | 46010939 |
| chr1 | 45917338 | 45959477 |
| chr1 | 45959385 | 45960625 |
| chr1 | 46022971 | 46023213 |
| chr1 | 46033801 | 46033987 |
| chr1 | 46632758 | 46645256 |
| chr1 | 46678468 | 46691937 |
| chr1 | 47287550 | 47300072 |
| chr1 | 47289434 | 47300072 |
| chr1 | 47348986 | 47373107 |
| chr1 | 47368468 | 47376882 |
| chr1 | 50529662 | 50596216 |

|      |          |          |
|------|----------|----------|
| chr1 | 50563305 | 50567231 |
| chr1 | 50567076 | 50606942 |
| chr1 | 50567076 | 50752523 |
| chr1 | 50655441 | 50781044 |
| chr1 | 50705785 | 50781044 |
| chr1 | 50738862 | 50752523 |
| chr1 | 50738862 | 50781044 |
| chr1 | 51269955 | 51271473 |
| chr1 | 51271150 | 51271473 |
| chr1 | 51437105 | 51448135 |
| chr1 | 52083339 | 52086853 |
| chr1 | 52515890 | 52529873 |
| chr1 | 52860730 | 52892975 |
| chr1 | 52860730 | 52899713 |
| chr1 | 52877681 | 52892975 |
| chr1 | 52877772 | 52881665 |
| chr1 | 52886955 | 52892975 |
| chr1 | 52954739 | 52968083 |
| chr1 | 52978227 | 52980543 |
| chr1 | 54190737 | 54195715 |
| chr1 | 56496554 | 56537112 |
| chr1 | 56655003 | 56674522 |
| chr1 | 58492782 | 58536741 |
| chr1 | 58506059 | 58536595 |
| chr1 | 58506059 | 58537466 |
| chr1 | 58506059 | 58544724 |
| chr1 | 58515743 | 58527335 |
| chr1 | 58522826 | 58536741 |
| chr1 | 5922059  | 5933329  |
| chr1 | 5922059  | 5986327  |
| chr1 | 5927648  | 5986232  |
| chr1 | 59321535 | 59332032 |
| chr1 | 59321535 | 59474202 |
| chr1 | 5947103  | 5986232  |
| chr1 | 5952699  | 5990971  |
| chr1 | 61088148 | 61159155 |
| chr1 | 61672625 | 61709437 |
| chr1 | 61972925 | 62051058 |
| chr1 | 62577261 | 62626904 |
| chr1 | 62803718 | 62810586 |
| chr1 | 63411925 | 63436915 |
| chr1 | 63478763 | 63502426 |
| chr1 | 63628204 | 63654466 |
| chr1 | 6667708  | 6691831  |
| chr1 | 6792012  | 6825210  |



|      |          |          |
|------|----------|----------|
| chr1 | 6796814  | 6825210  |
| chr1 | 6806982  | 6825210  |
| chr1 | 6871756  | 6903630  |
| chr1 | 70221632 | 70228555 |
| chr1 | 70228421 | 70230618 |
| chr1 | 75790135 | 75790517 |
| chr1 | 77154448 | 77169372 |
| chr1 | 77154448 | 77212347 |
| chr1 | 77206639 | 77212347 |
| chr1 | 77565441 | 77584655 |
| chr1 | 77621691 | 77633405 |
| chr1 | 77631843 | 77641655 |
| chr1 | 77631849 | 77675689 |
| chr1 | 77633114 | 77641655 |
| chr1 | 77639448 | 77675689 |
| chr1 | 77858937 | 77875111 |
| chr1 | 77873003 | 77875111 |
| chr1 | 77944182 | 77960495 |
| chr1 | 77968164 | 77979103 |
| chr1 | 78268849 | 78342640 |
| chr1 | 7977651  | 7985135  |
| chr1 | 84111534 | 84144548 |
| chr1 | 84144219 | 84144548 |
| chr1 | 84144219 | 84214317 |
| chr1 | 84179176 | 84235364 |
| chr1 | 84647497 | 84671308 |
| chr1 | 847653   | 853522   |
| chr1 | 84865384 | 84865802 |
| chr1 | 8495062  | 8551356  |
| chr1 | 85321412 | 85324883 |
| chr1 | 85350414 | 85360537 |
| chr1 | 85350414 | 85361500 |
| chr1 | 85350414 | 85361854 |
| chr1 | 85350414 | 85367779 |
| chr1 | 85350414 | 85409711 |
| chr1 | 8541213  | 8557537  |
| chr1 | 8541213  | 8621825  |
| chr1 | 86715723 | 86743235 |
| chr1 | 8736882  | 8792588  |
| chr1 | 88691723 | 88741288 |
| chr1 | 88784638 | 88790053 |
| chr1 | 88936098 | 88955225 |
| chr1 | 90916639 | 90918154 |
| chr1 | 90916639 | 90941309 |
| chr1 | 90916759 | 90918154 |

|      |          |          |
|------|----------|----------|
| chr1 | 91513182 | 91515876 |
| chr1 | 92087208 | 92088895 |
| chr1 | 92088697 | 92147786 |
| chr1 | 92107883 | 92147786 |
| chr1 | 92177810 | 92180416 |
| chr1 | 92333390 | 92363770 |
| chr1 | 92333415 | 92380873 |
| chr1 | 925921   | 939412   |
| chr1 | 92605306 | 92639237 |
| chr1 | 92624175 | 92648985 |
| chr1 | 92662718 | 92665992 |
| chr1 | 92662718 | 92704744 |
| chr1 | 92725597 | 92736627 |
| chr1 | 92732509 | 92736627 |
| chr1 | 92736397 | 92738040 |
| chr1 | 92736397 | 92745802 |
| chr1 | 92736397 | 92774023 |
| chr1 | 93154655 | 93160226 |
| chr1 | 93156299 | 93162785 |
| chr1 | 93305387 | 93311608 |
| chr1 | 93305387 | 93325895 |
| chr1 | 93305387 | 93340510 |
| chr1 | 93324634 | 93331812 |
| chr1 | 93360492 | 93362958 |
| chr1 | 93490743 | 93499583 |
| chr1 | 93490743 | 93534908 |
| chr1 | 935771   | 939412   |
| chr1 | 93588976 | 93605200 |
| chr1 | 93667095 | 93674941 |
| chr1 | 94455732 | 94468007 |
| chr1 | 94455732 | 94475737 |
| chr1 | 94901807 | 94902120 |
| chr1 | 94961316 | 94963170 |
| chr1 | 95138274 | 95151419 |
| chr1 | 95138274 | 95173889 |
| chr1 | 95143890 | 95218458 |
| chr1 | 9726908  | 9727772  |
| chr1 | 9730404  | 9730705  |
| chr1 | 9740657  | 9741256  |
| chr1 | 97679094 | 97757863 |
| chr1 | 9773271  | 9809407  |
| chr1 | 9922185  | 9934860  |
| chr1 | 9922185  | 9935627  |
| chr1 | 9931890  | 9942711  |
| chr1 | 9970752  | 9981170  |

|       |          |          |
|-------|----------|----------|
| chr1  | 99710805 | 99729748 |
| chr20 | 10449355 | 10458231 |
| chr20 | 1164476  | 1165006  |
| chr20 | 13483226 | 13600617 |
| chr20 | 13483226 | 13610919 |
| chr20 | 13483226 | 13617123 |
| chr20 | 13528432 | 13537049 |
| chr20 | 13528432 | 13610919 |
| chr20 | 13528432 | 13617123 |
| chr20 | 13528445 | 13559114 |
| chr20 | 13528445 | 13569586 |
| chr20 | 13551886 | 13587370 |
| chr20 | 13559007 | 13600617 |
| chr20 | 13559007 | 13610919 |
| chr20 | 13559007 | 13611015 |
| chr20 | 13569506 | 13617123 |
| chr20 | 13580896 | 13610919 |
| chr20 | 13616856 | 13630152 |
| chr20 | 14002287 | 14009973 |
| chr20 | 17658604 | 17658799 |
| chr20 | 17943109 | 17954231 |
| chr20 | 17952586 | 17954231 |
| chr20 | 17955364 | 17961326 |
| chr20 | 17956932 | 17961326 |
| chr20 | 17969800 | 17970130 |
| chr20 | 18142207 | 18142919 |
| chr20 | 18142207 | 18145351 |
| chr20 | 18142207 | 18150942 |
| chr20 | 18142207 | 18154244 |
| chr20 | 18305178 | 18305666 |
| chr20 | 18543026 | 18554390 |
| chr20 | 18742152 | 18744271 |
| chr20 | 19935098 | 19935607 |
| chr20 | 20022455 | 20022988 |
| chr20 | 20025668 | 20026919 |
| chr20 | 20472755 | 20526362 |
| chr20 | 20629362 | 20644083 |
| chr20 | 2116665  | 2143892  |
| chr20 | 21331818 | 21332274 |
| chr20 | 24962695 | 24973737 |
| chr20 | 25306919 | 25307965 |
| chr20 | 25319051 | 25320318 |
| chr20 | 25323324 | 25342096 |
| chr20 | 25338884 | 25339351 |
| chr20 | 25413789 | 25426100 |

|       |          |          |
|-------|----------|----------|
| chr20 | 25632157 | 25645648 |
| chr20 | 25632157 | 25674007 |
| chr20 | 25632157 | 25683223 |
| chr20 | 25634048 | 25645648 |
| chr20 | 25639728 | 25645648 |
| chr20 | 25835983 | 25848948 |
| chr20 | 2886289  | 2965202  |
| chr20 | 29091593 | 29100460 |
| chr20 | 31527483 | 31528050 |
| chr20 | 31766576 | 31794024 |
| chr20 | 320504   | 322565   |
| chr20 | 321738   | 322565   |
| chr20 | 3218516  | 3218994  |
| chr20 | 32316217 | 32331551 |
| chr20 | 32326770 | 32331546 |
| chr20 | 32366383 | 32369883 |
| chr20 | 32366383 | 32371874 |
| chr20 | 32366383 | 32372239 |
| chr20 | 32366383 | 32376182 |
| chr20 | 32366383 | 32389728 |
| chr20 | 32366383 | 32391167 |
| chr20 | 32366383 | 32391336 |
| chr20 | 32366383 | 32393973 |
| chr20 | 32366383 | 32410418 |
| chr20 | 32824705 | 32826048 |
| chr20 | 33379460 | 33382179 |
| chr20 | 33392134 | 33397084 |
| chr20 | 33589611 | 33623296 |
| chr20 | 33782288 | 33783864 |
| chr20 | 34017409 | 34031604 |
| chr20 | 34029768 | 34031604 |
| chr20 | 34031521 | 34033318 |
| chr20 | 34059192 | 34078553 |
| chr20 | 34065043 | 34072330 |
| chr20 | 34065043 | 34078553 |
| chr20 | 34072065 | 34080072 |
| chr20 | 34072065 | 34084809 |
| chr20 | 34089515 | 34090602 |
| chr20 | 34280521 | 34281165 |
| chr20 | 34280521 | 34285634 |
| chr20 | 34281026 | 34295585 |
| chr20 | 34424479 | 34426381 |
| chr20 | 34481065 | 34507908 |
| chr20 | 34714589 | 34715365 |
| chr20 | 34762726 | 34768586 |

|       |          |          |
|-------|----------|----------|
| chr20 | 34882793 | 34883615 |
| chr20 | 35035122 | 35044606 |
| chr20 | 35126250 | 35127016 |
| chr20 | 35366556 | 35375945 |
| chr20 | 35384037 | 35386389 |
| chr20 | 35477867 | 35478101 |
| chr20 | 35501966 | 35502328 |
| chr20 | 35511362 | 35512066 |
| chr20 | 35631267 | 35648376 |
| chr20 | 35653527 | 35658982 |
| chr20 | 35653527 | 35659014 |
| chr20 | 35653797 | 35659014 |
| chr20 | 35655156 | 35659014 |
| chr20 | 35655201 | 35659014 |
| chr20 | 35714184 | 35726424 |
| chr20 | 35721739 | 35742113 |
| chr20 | 35738967 | 35742113 |
| chr20 | 35792999 | 35801605 |
| chr20 | 35800093 | 35801605 |
| chr20 | 35801490 | 35812719 |
| chr20 | 36173883 | 36198041 |
| chr20 | 36609600 | 36614350 |
| chr20 | 36687417 | 36688784 |
| chr20 | 36751877 | 36752897 |
| chr20 | 36904156 | 36917096 |
| chr20 | 36911217 | 36917096 |
| chr20 | 37003701 | 37032751 |
| chr20 | 37301207 | 37302425 |
| chr20 | 38035215 | 38057644 |
| chr20 | 38057537 | 38066256 |
| chr20 | 38065802 | 38066256 |
| chr20 | 38130335 | 38132500 |
| chr20 | 38429953 | 38434626 |
| chr20 | 38479806 | 38493132 |
| chr20 | 38479806 | 38499633 |
| chr20 | 3854674  | 3864788  |
| chr20 | 3896863  | 3910830  |
| chr20 | 39028417 | 39038618 |
| chr20 | 3912457  | 3913612  |
| chr20 | 41201285 | 41205066 |
| chr20 | 41213733 | 41269083 |
| chr20 | 41238687 | 41269083 |
| chr20 | 41267462 | 41269083 |
| chr20 | 41512845 | 41564151 |
| chr20 | 417219   | 417930   |

|       |          |          |
|-------|----------|----------|
| chr20 | 43594692 | 43605216 |
| chr20 | 44500156 | 44501300 |
| chr20 | 44719896 | 44722446 |
| chr20 | 44975323 | 44987296 |
| chr20 | 45024972 | 45053180 |
| chr20 | 45366874 | 45410255 |
| chr20 | 45888890 | 45890249 |
| chr20 | 45952597 | 45957702 |
| chr20 | 46063336 | 46079453 |
| chr20 | 46122358 | 46122582 |
| chr20 | 47276230 | 47276795 |
| chr20 | 47309658 | 47310204 |
| chr20 | 47339204 | 47347926 |
| chr20 | 48939916 | 48963898 |
| chr20 | 4899554  | 4970915  |
| chr20 | 49084025 | 49091066 |
| chr20 | 49114768 | 49124605 |
| chr20 | 49135832 | 49159146 |
| chr20 | 49153932 | 49156671 |
| chr20 | 49153932 | 49159146 |
| chr20 | 49642616 | 49643525 |
| chr20 | 49646964 | 49647892 |
| chr20 | 49952075 | 49960298 |
| chr20 | 50172582 | 50173017 |
| chr20 | 50645697 | 50651404 |
| chr20 | 50902016 | 50918781 |
| chr20 | 50935029 | 50942126 |
| chr20 | 51009564 | 51012416 |
| chr20 | 5144792  | 5173659  |
| chr20 | 5189066  | 5190757  |
| chr20 | 52084491 | 52088643 |
| chr20 | 52084491 | 52097435 |
| chr20 | 52084491 | 52098587 |
| chr20 | 5598724  | 5609766  |
| chr20 | 56382984 | 56390100 |
| chr20 | 5700744  | 5773043  |
| chr20 | 58247321 | 58271505 |
| chr20 | 58271362 | 58272875 |
| chr20 | 58271362 | 58286446 |
| chr20 | 58343717 | 58359735 |
| chr20 | 58991446 | 58991857 |
| chr20 | 62179181 | 62181995 |
| chr20 | 62195801 | 62199283 |
| chr20 | 62286582 | 62295792 |
| chr20 | 62658676 | 62670120 |

|       |          |          |
|-------|----------|----------|
| chr20 | 62660533 | 62660891 |
| chr20 | 62852722 | 62854157 |
| chr20 | 62852722 | 62857638 |
| chr20 | 62852722 | 62860308 |
| chr20 | 62854015 | 62860256 |
| chr20 | 6355479  | 6473655  |
| chr20 | 63733739 | 63734673 |
| chr20 | 63775677 | 63805464 |
| chr20 | 63917576 | 63931022 |
| chr20 | 63926541 | 63931022 |
| chr20 | 63928334 | 63931182 |
| chr20 | 63928334 | 63931734 |
| chr20 | 63944396 | 63945988 |
| chr20 | 6446722  | 6530103  |
| chr20 | 6473538  | 6484225  |
| chr20 | 8603566  | 8658704  |
| chr20 | 9217389  | 9218382  |
| chr20 | 9326279  | 9339037  |
| chr20 | 9457413  | 9460596  |
| chr20 | 9468672  | 9472761  |
| chr21 | 14853273 | 15014466 |
| chr21 | 14857541 | 15043574 |
| chr21 | 14964469 | 15014466 |
| chr21 | 14964621 | 15043574 |
| chr21 | 14964712 | 15014466 |
| chr21 | 14968296 | 15043574 |
| chr21 | 14979200 | 15043574 |
| chr21 | 14991200 | 15014466 |
| chr21 | 14994694 | 15043574 |
| chr21 | 15011169 | 15014466 |
| chr21 | 15011169 | 15043574 |
| chr21 | 15014343 | 15015225 |
| chr21 | 15014343 | 15043570 |
| chr21 | 15014343 | 15045323 |
| chr21 | 15014343 | 15045613 |
| chr21 | 15042716 | 15043574 |
| chr21 | 15740415 | 15778027 |
| chr21 | 15761561 | 15766141 |
| chr21 | 17594053 | 17609152 |
| chr21 | 18589526 | 18612293 |
| chr21 | 18612052 | 18738025 |
| chr21 | 21196109 | 21374013 |
| chr21 | 22096528 | 22190634 |
| chr21 | 28162191 | 28163717 |
| chr21 | 28163601 | 28197822 |

|       |          |          |
|-------|----------|----------|
| chr21 | 28163601 | 28228478 |
| chr21 | 28212239 | 28228478 |
| chr21 | 28212239 | 28402154 |
| chr21 | 29321220 | 29361713 |
| chr21 | 29327280 | 29329693 |
| chr21 | 29351633 | 29411624 |
| chr21 | 29370920 | 29372563 |
| chr21 | 29582311 | 29597694 |
| chr21 | 29597569 | 29637721 |
| chr21 | 31338634 | 31339422 |
| chr21 | 31690796 | 31697474 |
| chr21 | 32274829 | 32284155 |
| chr21 | 32368402 | 32375461 |
| chr21 | 32691284 | 32695282 |
| chr21 | 32693171 | 32695282 |
| chr21 | 33407174 | 33415020 |
| chr21 | 34094862 | 34125480 |
| chr21 | 34102834 | 34125480 |
| chr21 | 34125340 | 34164706 |
| chr21 | 34834142 | 34834601 |
| chr21 | 36007318 | 36007834 |
| chr21 | 36232803 | 36293575 |
| chr21 | 36280284 | 36293575 |
| chr21 | 36338771 | 36344707 |
| chr21 | 36338774 | 36344707 |
| chr21 | 36338778 | 36344707 |
| chr21 | 36341194 | 36344707 |
| chr21 | 36377409 | 36386262 |
| chr21 | 36754179 | 36765172 |
| chr21 | 36754179 | 36767285 |
| chr21 | 36892579 | 36897131 |
| chr21 | 36896859 | 36910538 |
| chr21 | 37065467 | 37072537 |
| chr21 | 37084008 | 37096643 |
| chr21 | 37087246 | 37096906 |
| chr21 | 37087246 | 37098010 |
| chr21 | 37087246 | 37098160 |
| chr21 | 37087246 | 37099748 |
| chr21 | 37420298 | 37421866 |
| chr21 | 37420298 | 37425781 |
| chr21 | 37420298 | 37427401 |
| chr21 | 37420298 | 37430400 |
| chr21 | 37420298 | 37456308 |
| chr21 | 39177488 | 39179986 |
| chr21 | 39246952 | 39258672 |



|       |          |          |
|-------|----------|----------|
| chr21 | 41237512 | 41241939 |
| chr21 | 41942146 | 41943752 |
| chr21 | 42685821 | 42686262 |
| chr21 | 43004325 | 43029981 |
| chr21 | 43058279 | 43058833 |
| chr21 | 43529757 | 43613947 |
| chr21 | 43592224 | 43620693 |
| chr21 | 43741666 | 43756099 |
| chr21 | 43903956 | 43904452 |
| chr21 | 43903956 | 43906907 |
| chr21 | 43980988 | 43982619 |
| chr21 | 44956714 | 44967181 |
| chr21 | 45116932 | 45134832 |
| chr21 | 45118563 | 45128573 |
| chr21 | 45118563 | 45134832 |
| chr21 | 45120793 | 45128573 |
| chr21 | 45128401 | 45144701 |
| chr21 | 45788297 | 45850095 |
| chr21 | 46161382 | 46168658 |
| chr21 | 46314715 | 46318961 |
| chr21 | 46479551 | 46498833 |
| chr21 | 46548428 | 46549885 |
| chr22 | 16602063 | 16614178 |
| chr22 | 16602063 | 16638740 |
| chr22 | 16630980 | 16638740 |
| chr22 | 17702242 | 17704228 |
| chr22 | 17826453 | 17832107 |
| chr22 | 18083436 | 18089333 |
| chr22 | 18987756 | 18988195 |
| chr22 | 19139854 | 19140021 |
| chr22 | 19351071 | 19410778 |
| chr22 | 19433264 | 19435913 |
| chr22 | 19447377 | 19450744 |
| chr22 | 19852539 | 19854442 |
| chr22 | 20093679 | 20094795 |
| chr22 | 20119012 | 20127450 |
| chr22 | 20140217 | 20140598 |
| chr22 | 20985840 | 20986174 |
| chr22 | 21700975 | 21710908 |
| chr22 | 21700975 | 21807846 |
| chr22 | 21769194 | 21805945 |
| chr22 | 21788256 | 21805945 |
| chr22 | 21805824 | 21807846 |
| chr22 | 21939531 | 21941587 |
| chr22 | 23659864 | 23686995 |

|       |          |          |
|-------|----------|----------|
| chr22 | 23683724 | 23686995 |
| chr22 | 23683724 | 23695512 |
| chr22 | 23816624 | 23825415 |
| chr22 | 24567983 | 24572061 |
| chr22 | 25170819 | 25192668 |
| chr22 | 25181698 | 25192668 |
| chr22 | 25351611 | 25354812 |
| chr22 | 25354595 | 25381578 |
| chr22 | 25375812 | 25381578 |
| chr22 | 25587962 | 25604453 |
| chr22 | 25594298 | 25604453 |
| chr22 | 25594298 | 25644665 |
| chr22 | 25594298 | 25667800 |
| chr22 | 25594298 | 25678915 |
| chr22 | 26526028 | 26544675 |
| chr22 | 26717252 | 26718231 |
| chr22 | 27853512 | 27860241 |
| chr22 | 27853512 | 27873815 |
| chr22 | 27853524 | 27860241 |
| chr22 | 27853536 | 27860241 |
| chr22 | 27853536 | 27873815 |
| chr22 | 27935150 | 27940171 |
| chr22 | 28163091 | 28163595 |
| chr22 | 28296197 | 28299669 |
| chr22 | 28296197 | 28360201 |
| chr22 | 28515626 | 28629830 |
| chr22 | 28583546 | 28629830 |
| chr22 | 28629551 | 28633620 |
| chr22 | 28629551 | 28633974 |
| chr22 | 28629551 | 28646269 |
| chr22 | 28629551 | 28656539 |
| chr22 | 28629551 | 28661900 |
| chr22 | 28695709 | 28697129 |
| chr22 | 28699837 | 28724923 |
| chr22 | 29502378 | 29519120 |
| chr22 | 29560852 | 29561170 |
| chr22 | 29560855 | 29561170 |
| chr22 | 29978424 | 29991670 |
| chr22 | 30016542 | 30018072 |
| chr22 | 30079138 | 30098993 |
| chr22 | 30243739 | 30244061 |
| chr22 | 30342909 | 30344932 |
| chr22 | 30646597 | 30649253 |
| chr22 | 30731496 | 30741369 |
| chr22 | 30741160 | 30743835 |

|       |          |          |
|-------|----------|----------|
| chr22 | 30741160 | 30773245 |
| chr22 | 30870428 | 30919211 |
| chr22 | 31095609 | 31096628 |
| chr22 | 31433871 | 31435265 |
| chr22 | 31455821 | 31463133 |
| chr22 | 31672210 | 31704726 |
| chr22 | 31814564 | 31815212 |
| chr22 | 33549931 | 33565019 |
| chr22 | 33562855 | 33565019 |
| chr22 | 33564847 | 33577964 |
| chr22 | 33713547 | 33761558 |
| chr22 | 33737479 | 33856802 |
| chr22 | 33761370 | 33761723 |
| chr22 | 33761370 | 33765953 |
| chr22 | 33761370 | 33767719 |
| chr22 | 33761370 | 33769743 |
| chr22 | 33761370 | 33847741 |
| chr22 | 33761370 | 33880733 |
| chr22 | 33761370 | 33900554 |
| chr22 | 33856739 | 33900554 |
| chr22 | 35192184 | 35195019 |
| chr22 | 35262322 | 35293743 |
| chr22 | 35287346 | 35293743 |
| chr22 | 35292991 | 35293743 |
| chr22 | 35421460 | 35423192 |
| chr22 | 35423341 | 35424128 |
| chr22 | 35656378 | 35659449 |
| chr22 | 35809779 | 35992754 |
| chr22 | 35936290 | 35938897 |
| chr22 | 36285347 | 36285657 |
| chr22 | 36285356 | 36285657 |
| chr22 | 36493632 | 36493972 |
| chr22 | 37496448 | 37588689 |
| chr22 | 37629526 | 37629975 |
| chr22 | 37886764 | 37888577 |
| chr22 | 37937079 | 37937819 |
| chr22 | 38302860 | 38303420 |
| chr22 | 38474232 | 38474623 |
| chr22 | 38521607 | 38541673 |
| chr22 | 38617738 | 38623279 |
| chr22 | 38636450 | 38650154 |
| chr22 | 38826499 | 38828509 |
| chr22 | 39414879 | 39421971 |
| chr22 | 40409018 | 40409232 |
| chr22 | 40519463 | 40552367 |

|       |          |          |
|-------|----------|----------|
| chr22 | 40519463 | 40594735 |
| chr22 | 40548718 | 40552367 |
| chr22 | 40552105 | 40586112 |
| chr22 | 40868998 | 40870139 |
| chr22 | 40868998 | 40926463 |
| chr22 | 40886312 | 40888521 |
| chr22 | 41528540 | 41540795 |
| chr22 | 41540698 | 41541090 |
| chr22 | 41600697 | 41604153 |
| chr22 | 41658352 | 41661298 |
| chr22 | 42019310 | 42030823 |
| chr22 | 42516010 | 42577098 |
| chr22 | 42518213 | 42519713 |
| chr22 | 42583940 | 42585968 |
| chr22 | 42627412 | 42627604 |
| chr22 | 42797467 | 42799160 |
| chr22 | 42817141 | 42822607 |
| chr22 | 42840943 | 42858522 |
| chr22 | 42909426 | 42912157 |
| chr22 | 42912020 | 42999640 |
| chr22 | 43039779 | 43046573 |
| chr22 | 43168092 | 43174615 |
| chr22 | 45178590 | 45178900 |
| chr22 | 45330602 | 45340561 |
| chr22 | 45417601 | 45419359 |
| chr22 | 45729404 | 45740538 |
| chr22 | 45736967 | 45807022 |
| chr22 | 45793544 | 45807022 |
| chr22 | 46097925 | 46109908 |
| chr22 | 46098010 | 46098469 |
| chr22 | 46175988 | 46198591 |
| chr22 | 46623412 | 46626961 |
| chr22 | 46626750 | 46637960 |
| chr22 | 46788979 | 46797620 |
| chr22 | 46789311 | 46797620 |
| chr22 | 46793509 | 46912188 |
| chr22 | 46974289 | 46977520 |
| chr22 | 46974289 | 46978934 |
| chr22 | 46990014 | 47037198 |
| chr22 | 46990694 | 47037198 |
| chr22 | 47034455 | 47037198 |
| chr22 | 47662848 | 47687206 |
| chr22 | 47684516 | 47687206 |
| chr22 | 47686199 | 47707170 |
| chr22 | 47704588 | 47710747 |

|       |           |           |
|-------|-----------|-----------|
| chr22 | 47704588  | 47728995  |
| chr22 | 49883333  | 49895233  |
| chr22 | 50204918  | 50206520  |
| chr22 | 50294202  | 50294778  |
| chr22 | 50294718  | 50296392  |
| chr22 | 50372019  | 50389111  |
| chr22 | 50372019  | 50394079  |
| chr22 | 50372019  | 50394124  |
| chr22 | 50443865  | 50444278  |
| chr22 | 50459969  | 50467448  |
| chr22 | 50768759  | 50782351  |
| chr2  | 101260489 | 101262691 |
| chr2  | 102783893 | 102798000 |
| chr2  | 105049170 | 105056604 |
| chr2  | 105339582 | 105345389 |
| chr2  | 10600852  | 10608283  |
| chr2  | 10636524  | 10659250  |
| chr2  | 10643320  | 10644372  |
| chr2  | 108472041 | 108475850 |
| chr2  | 108621391 | 108659764 |
| chr2  | 108769259 | 108773046 |
| chr2  | 108839184 | 108850755 |
| chr2  | 108846737 | 108882791 |
| chr2  | 108873450 | 108876442 |
| chr2  | 108873450 | 108877146 |
| chr2  | 109329223 | 109347949 |
| chr2  | 110666269 | 110669553 |
| chr2  | 111233627 | 111367575 |
| chr2  | 111365560 | 111367575 |
| chr2  | 111772340 | 111792551 |
| chr2  | 112485916 | 112494410 |
| chr2  | 112485916 | 112496028 |
| chr2  | 11249660  | 11288449  |
| chr2  | 11286538  | 11288449  |
| chr2  | 113444963 | 113457204 |
| chr2  | 113830851 | 113843353 |
| chr2  | 118096418 | 118108377 |
| chr2  | 118096418 | 118109900 |
| chr2  | 118103196 | 118108377 |
| chr2  | 119789751 | 119809991 |
| chr2  | 119916622 | 119934958 |
| chr2  | 120027589 | 120042110 |
| chr2  | 120127687 | 120175000 |
| chr2  | 120127687 | 120175004 |
| chr2  | 120278617 | 120293309 |

|      |           |           |
|------|-----------|-----------|
| chr2 | 121515664 | 121530513 |
| chr2 | 121605700 | 121621213 |
| chr2 | 127329920 | 127343194 |
| chr2 | 127335869 | 127343194 |
| chr2 | 127731782 | 127771004 |
| chr2 | 127763061 | 127770934 |
| chr2 | 127768188 | 127770934 |
| chr2 | 131052282 | 131055695 |
| chr2 | 131071854 | 131072295 |
| chr2 | 131082576 | 131089336 |
| chr2 | 131500203 | 131502692 |
| chr2 | 134250049 | 134270550 |
| chr2 | 134253094 | 134254644 |
| chr2 | 134253094 | 134270550 |
| chr2 | 134254261 | 134270550 |
| chr2 | 134254264 | 134270550 |
| chr2 | 134866541 | 134869041 |
| chr2 | 134867519 | 134869041 |
| chr2 | 135089650 | 135093693 |
| chr2 | 135120818 | 135127662 |
| chr2 | 135162554 | 135176443 |
| chr2 | 135335399 | 135345635 |
| chr2 | 135565736 | 135605016 |
| chr2 | 135602499 | 135606226 |
| chr2 | 135602499 | 135633828 |
| chr2 | 135645378 | 135671512 |
| chr2 | 135645378 | 135695906 |
| chr2 | 135649901 | 135652032 |
| chr2 | 135745899 | 135755691 |
| chr2 | 135840528 | 135852915 |
| chr2 | 135852286 | 135859442 |
| chr2 | 135924386 | 135930599 |
| chr2 | 143910138 | 143970762 |
| chr2 | 144141881 | 144275218 |
| chr2 | 144177134 | 144182476 |
| chr2 | 144208602 | 144319868 |
| chr2 | 144294364 | 144319868 |
| chr2 | 147870450 | 147899567 |
| chr2 | 147871445 | 147899898 |
| chr2 | 148178699 | 148186180 |
| chr2 | 148310129 | 148342336 |
| chr2 | 148690213 | 148703808 |
| chr2 | 149449048 | 149470797 |
| chr2 | 149468644 | 149486345 |
| chr2 | 150469923 | 150487455 |

|      |           |           |
|------|-----------|-----------|
| chr2 | 151422949 | 151425565 |
| chr2 | 151841667 | 151842088 |
| chr2 | 15461200  | 15478321  |
| chr2 | 156476097 | 156483466 |
| chr2 | 158457152 | 158642699 |
| chr2 | 158477243 | 158533316 |
| chr2 | 158533179 | 158578263 |
| chr2 | 158994901 | 159001189 |
| chr2 | 158998477 | 159001189 |
| chr2 | 159001079 | 159011440 |
| chr2 | 159248371 | 159282873 |
| chr2 | 160300650 | 160329883 |
| chr2 | 161359715 | 161367903 |
| chr2 | 1632505   | 1644752   |
| chr2 | 1691927   | 1734453   |
| chr2 | 169560386 | 169571191 |
| chr2 | 169592650 | 169614724 |
| chr2 | 169631598 | 169631933 |
| chr2 | 170013840 | 170040985 |
| chr2 | 170013840 | 170061443 |
| chr2 | 170053818 | 170061443 |
| chr2 | 170817048 | 170818510 |
| chr2 | 170842568 | 170854022 |
| chr2 | 171011372 | 171023129 |
| chr2 | 171045061 | 171046362 |
| chr2 | 171082780 | 171092227 |
| chr2 | 171117302 | 171117857 |
| chr2 | 171117317 | 171117857 |
| chr2 | 171117738 | 171132092 |
| chr2 | 171271218 | 171339554 |
| chr2 | 171301011 | 171330698 |
| chr2 | 171324043 | 171331867 |
| chr2 | 171324116 | 171339554 |
| chr2 | 171447686 | 171473975 |
| chr2 | 171468887 | 171469452 |
| chr2 | 171468887 | 171469456 |
| chr2 | 171536888 | 171541793 |
| chr2 | 171540807 | 171541793 |
| chr2 | 173090997 | 173137920 |
| chr2 | 173358711 | 173367831 |
| chr2 | 173363225 | 173367831 |
| chr2 | 173365451 | 173367831 |
| chr2 | 174123179 | 174157864 |
| chr2 | 174123179 | 174182524 |
| chr2 | 174141824 | 174182524 |

|      |           |           |
|------|-----------|-----------|
| chr2 | 174141824 | 174203683 |
| chr2 | 174182416 | 174229451 |
| chr2 | 174210880 | 174229451 |
| chr2 | 174875787 | 174878128 |
| chr2 | 174915057 | 174940894 |
| chr2 | 175935707 | 175964589 |
| chr2 | 175939551 | 175964533 |
| chr2 | 175970198 | 175995646 |
| chr2 | 176296859 | 176337577 |
| chr2 | 177219036 | 177222133 |
| chr2 | 177231884 | 177234271 |
| chr2 | 177231888 | 177234271 |
| chr2 | 17759931  | 17768811  |
| chr2 | 178332640 | 178382530 |
| chr2 | 178527195 | 178542361 |
| chr2 | 178531313 | 178542361 |
| chr2 | 178535731 | 178542995 |
| chr2 | 178535731 | 178548554 |
| chr2 | 178571299 | 178575326 |
| chr2 | 178576946 | 178583921 |
| chr2 | 178582571 | 178583648 |
| chr2 | 178591117 | 178600667 |
| chr2 | 178591138 | 178608266 |
| chr2 | 179172119 | 179237433 |
| chr2 | 180982017 | 181063041 |
| chr2 | 181057692 | 181063041 |
| chr2 | 181892031 | 181899112 |
| chr2 | 183133565 | 183161195 |
| chr2 | 183151507 | 183161195 |
| chr2 | 183151507 | 183182680 |
| chr2 | 183151507 | 183188763 |
| chr2 | 183157443 | 183161195 |
| chr2 | 183161053 | 183182680 |
| chr2 | 185729328 | 185788943 |
| chr2 | 186081329 | 186086370 |
| chr2 | 186081329 | 186099830 |
| chr2 | 186636009 | 186641588 |
| chr2 | 188334340 | 188383889 |
| chr2 | 189791789 | 189818829 |
| chr2 | 189791789 | 189820591 |
| chr2 | 189794139 | 189795951 |
| chr2 | 189794848 | 189795951 |
| chr2 | 190488697 | 190510537 |
| chr2 | 190490708 | 190510537 |
| chr2 | 190510360 | 190519022 |



|      |           |           |
|------|-----------|-----------|
| chr2 | 190899116 | 190924593 |
| chr2 | 190910262 | 190913364 |
| chr2 | 191693202 | 191693554 |
| chr2 | 196047351 | 196075205 |
| chr2 | 196912881 | 196923125 |
| chr2 | 197069829 | 197090032 |
| chr2 | 197298791 | 197301413 |
| chr2 | 197503038 | 197503246 |
| chr2 | 197503038 | 197503330 |
| chr2 | 197523623 | 197559757 |
| chr2 | 197535529 | 197536041 |
| chr2 | 199297362 | 199349173 |
| chr2 | 199368604 | 199419896 |
| chr2 | 199933026 | 199948472 |
| chr2 | 200987364 | 201011472 |
| chr2 | 201140356 | 201164084 |
| chr2 | 201145377 | 201164084 |
| chr2 | 201160431 | 201164084 |
| chr2 | 201744257 | 201761324 |
| chr2 | 202206736 | 202220106 |
| chr2 | 202282350 | 202304606 |
| chr2 | 202456535 | 202467689 |
| chr2 | 20260336  | 20333063  |
| chr2 | 202779389 | 202819899 |
| chr2 | 202779389 | 202829016 |
| chr2 | 20278194  | 20297678  |
| chr2 | 20278582  | 20333063  |
| chr2 | 20278582  | 20346093  |
| chr2 | 20290651  | 20333063  |
| chr2 | 20297552  | 20333063  |
| chr2 | 203045635 | 203049975 |
| chr2 | 203056410 | 203057453 |
| chr2 | 20307977  | 20333063  |
| chr2 | 203127780 | 203128229 |
| chr2 | 20318536  | 20331937  |
| chr2 | 20318536  | 20333063  |
| chr2 | 203226122 | 203252109 |
| chr2 | 20326260  | 20333063  |
| chr2 | 203346364 | 203367044 |
| chr2 | 203355153 | 203367044 |
| chr2 | 203355153 | 203402734 |
| chr2 | 203366876 | 203427269 |
| chr2 | 203375931 | 203427269 |
| chr2 | 203376056 | 203427269 |
| chr2 | 203380207 | 203383321 |

|      |           |           |
|------|-----------|-----------|
| chr2 | 203380207 | 203427269 |
| chr2 | 203383246 | 203417081 |
| chr2 | 203402575 | 203427269 |
| chr2 | 203411284 | 203427269 |
| chr2 | 203489583 | 203497395 |
| chr2 | 204657141 | 204686282 |
| chr2 | 204661808 | 204686282 |
| chr2 | 205276261 | 205301701 |
| chr2 | 206085900 | 206095791 |
| chr2 | 206105964 | 206126844 |
| chr2 | 206159684 | 206159935 |
| chr2 | 206925921 | 206939667 |
| chr2 | 207123770 | 207124404 |
| chr2 | 207581793 | 207582160 |
| chr2 | 207596913 | 207597483 |
| chr2 | 207620640 | 207621917 |
| chr2 | 207714341 | 207742342 |
| chr2 | 207828222 | 207861262 |
| chr2 | 207828222 | 207908577 |
| chr2 | 207901127 | 207908577 |
| chr2 | 210015972 | 210021064 |
| chr2 | 210104103 | 210107839 |
| chr2 | 210104103 | 210155408 |
| chr2 | 210153494 | 210155404 |
| chr2 | 213310058 | 213356393 |
| chr2 | 214727659 | 214792445 |
| chr2 | 214728636 | 214745854 |
| chr2 | 214728917 | 214769312 |
| chr2 | 214728917 | 214792445 |
| chr2 | 215312497 | 215326161 |
| chr2 | 215325750 | 215326138 |
| chr2 | 215976561 | 215996465 |
| chr2 | 216277671 | 216295078 |
| chr2 | 218265705 | 218266063 |
| chr2 | 218495759 | 218565385 |
| chr2 | 218688390 | 218690555 |
| chr2 | 219250642 | 219252230 |
| chr2 | 219285986 | 219286314 |
| chr2 | 219601715 | 219601966 |
| chr2 | 222630112 | 222647325 |
| chr2 | 223878528 | 223880232 |
| chr2 | 223884647 | 223899117 |
| chr2 | 224528946 | 224535641 |
| chr2 | 224528946 | 224557856 |
| chr2 | 224535527 | 224558645 |

|      |           |           |
|------|-----------|-----------|
| chr2 | 224556294 | 224557856 |
| chr2 | 224557658 | 224558241 |
| chr2 | 226837547 | 226914351 |
| chr2 | 226864603 | 226867688 |
| chr2 | 227305459 | 227309293 |
| chr2 | 227328677 | 227357119 |
| chr2 | 229155817 | 229202012 |
| chr2 | 229388264 | 229394497 |
| chr2 | 229512782 | 229574850 |
| chr2 | 229836847 | 229842346 |
| chr2 | 230370907 | 230372136 |
| chr2 | 230436380 | 230450255 |
| chr2 | 230720455 | 230760115 |
| chr2 | 230720455 | 230793331 |
| chr2 | 230737806 | 230760115 |
| chr2 | 230737806 | 230793331 |
| chr2 | 230737806 | 230798897 |
| chr2 | 231063849 | 231087181 |
| chr2 | 231455088 | 231457800 |
| chr2 | 231962239 | 232030080 |
| chr2 | 232006244 | 232015671 |
| chr2 | 232087486 | 232088040 |
| chr2 | 232111196 | 232136719 |
| chr2 | 232192273 | 232210405 |
| chr2 | 232198526 | 232210405 |
| chr2 | 232722553 | 232724691 |
| chr2 | 232735154 | 232765979 |
| chr2 | 233363076 | 233390483 |
| chr2 | 233372044 | 233390483 |
| chr2 | 233382520 | 233390483 |
| chr2 | 233388256 | 233398449 |
| chr2 | 233449958 | 233452060 |
| chr2 | 233523390 | 233525562 |
| chr2 | 235566487 | 235744839 |
| chr2 | 235585724 | 235750488 |
| chr2 | 235777621 | 235807331 |
| chr2 | 235882295 | 235968623 |
| chr2 | 235904987 | 235908906 |
| chr2 | 235968461 | 235968957 |
| chr2 | 235968461 | 235969687 |
| chr2 | 235968461 | 235975448 |
| chr2 | 236120191 | 236124199 |
| chr2 | 23754178  | 23801497  |
| chr2 | 237973091 | 237973776 |
| chr2 | 238045681 | 238068165 |

|      |           |           |
|------|-----------|-----------|
| chr2 | 238073782 | 238083354 |
| chr2 | 238185009 | 238185287 |
| chr2 | 238433312 | 238433695 |
| chr2 | 239175448 | 239352918 |
| chr2 | 239236592 | 239354414 |
| chr2 | 23952469  | 23984831  |
| chr2 | 239987515 | 239990182 |
| chr2 | 239987515 | 240011696 |
| chr2 | 240003008 | 240005295 |
| chr2 | 240598397 | 240598623 |
| chr2 | 24060813  | 24063782  |
| chr2 | 241089187 | 241094432 |
| chr2 | 241255602 | 241256183 |
| chr2 | 241329610 | 241336098 |
| chr2 | 241373083 | 241395657 |
| chr2 | 241403827 | 241434381 |
| chr2 | 241498383 | 241498638 |
| chr2 | 241581011 | 241584725 |
| chr2 | 241583542 | 241584725 |
| chr2 | 24496319  | 24584560  |
| chr2 | 24510968  | 24584560  |
| chr2 | 24536714  | 24584560  |
| chr2 | 24554388  | 24584560  |
| chr2 | 24563903  | 24584560  |
| chr2 | 24564294  | 24584560  |
| chr2 | 24820876  | 24821516  |
| chr2 | 25623517  | 25628384  |
| chr2 | 25767582  | 25806337  |
| chr2 | 25799384  | 25806337  |
| chr2 | 26254429  | 26260441  |
| chr2 | 26364301  | 26390816  |
| chr2 | 26792130  | 26793897  |
| chr2 | 27333654  | 27350632  |
| chr2 | 27350313  | 27350632  |
| chr2 | 27368143  | 27368371  |
| chr2 | 27465410  | 27471396  |
| chr2 | 28025225  | 28051648  |
| chr2 | 28233142  | 28241393  |
| chr2 | 28752037  | 28799433  |
| chr2 | 28776850  | 28799433  |
| chr2 | 28926467  | 28930149  |
| chr2 | 28929578  | 28947161  |
| chr2 | 28941460  | 28947161  |
| chr2 | 29121373  | 29181697  |
| chr2 | 29121373  | 29181726  |

|      |          |          |
|------|----------|----------|
| chr2 | 29121373 | 29191683 |
| chr2 | 29121373 | 29192257 |
| chr2 | 29152684 | 29181697 |
| chr2 | 29167475 | 29181697 |
| chr2 | 29181571 | 29182167 |
| chr2 | 30459551 | 30477448 |
| chr2 | 30459551 | 30479911 |
| chr2 | 30525586 | 30552649 |
| chr2 | 30910947 | 30932194 |
| chr2 | 30924118 | 30938829 |
| chr2 | 30986834 | 30993007 |
| chr2 | 31073062 | 31125253 |
| chr2 | 31078933 | 31085023 |
| chr2 | 31078933 | 31125253 |
| chr2 | 31084899 | 31125253 |
| chr2 | 31125153 | 31132712 |
| chr2 | 3186022  | 3197017  |
| chr2 | 31864905 | 31869952 |
| chr2 | 31902459 | 31920910 |
| chr2 | 31917925 | 31932778 |
| chr2 | 31917925 | 31950717 |
| chr2 | 31917925 | 31956598 |
| chr2 | 31917925 | 31972301 |
| chr2 | 31943004 | 31943383 |
| chr2 | 3213541  | 3214248  |
| chr2 | 32171286 | 32184809 |
| chr2 | 32290482 | 32298350 |
| chr2 | 32298233 | 32307190 |
| chr2 | 32429145 | 32453954 |
| chr2 | 32435495 | 32471151 |
| chr2 | 32439507 | 32453954 |
| chr2 | 32464954 | 32467739 |
| chr2 | 32470270 | 32479617 |
| chr2 | 32621968 | 32650233 |
| chr2 | 32621968 | 32672384 |
| chr2 | 32649096 | 32678922 |
| chr2 | 32677960 | 32678922 |
| chr2 | 32678452 | 32678922 |
| chr2 | 33128431 | 33134960 |
| chr2 | 3318856  | 3338149  |
| chr2 | 3421880  | 3449477  |
| chr2 | 3497670  | 3500993  |
| chr2 | 3545700  | 3552308  |
| chr2 | 3545700  | 3556904  |
| chr2 | 3575888  | 3576460  |

|      |          |          |
|------|----------|----------|
| chr2 | 36358903 | 36396787 |
| chr2 | 36358903 | 36442735 |
| chr2 | 36358903 | 36464655 |
| chr2 | 36358903 | 36479694 |
| chr2 | 36358903 | 36522313 |
| chr2 | 36369107 | 36396787 |
| chr2 | 36369107 | 36442735 |
| chr2 | 36378356 | 36396787 |
| chr2 | 36378356 | 36442735 |
| chr2 | 36378356 | 36464655 |
| chr2 | 36387971 | 36396787 |
| chr2 | 36387971 | 36442735 |
| chr2 | 36387971 | 36464655 |
| chr2 | 36387971 | 36479694 |
| chr2 | 36396613 | 36413019 |
| chr2 | 36396613 | 36415769 |
| chr2 | 36396613 | 36431221 |
| chr2 | 37107257 | 37107527 |
| chr2 | 37122505 | 37148939 |
| chr2 | 37199703 | 37206248 |
| chr2 | 37236095 | 37248426 |
| chr2 | 37243862 | 37248426 |
| chr2 | 37252974 | 37290999 |
| chr2 | 37282541 | 37317179 |
| chr2 | 37316236 | 37317179 |
| chr2 | 37316236 | 37317899 |
| chr2 | 38069177 | 38071310 |
| chr2 | 38318534 | 38377260 |
| chr2 | 38591529 | 38597354 |
| chr2 | 39213399 | 39229588 |
| chr2 | 40428472 | 40430301 |
| chr2 | 40428472 | 40446648 |
| chr2 | 40428474 | 40430304 |
| chr2 | 42350722 | 42353343 |
| chr2 | 42704196 | 42747398 |
| chr2 | 43225796 | 43226264 |
| chr2 | 43590823 | 43592431 |
| chr2 | 43960540 | 43989690 |
| chr2 | 43973606 | 43989690 |
| chr2 | 44194197 | 44209327 |
| chr2 | 44372715 | 44505730 |
| chr2 | 44372715 | 44558013 |
| chr2 | 44704282 | 44707487 |
| chr2 | 45443836 | 45553730 |
| chr2 | 45518354 | 45562756 |

|      |          |          |
|------|----------|----------|
| chr2 | 45546316 | 45553730 |
| chr2 | 45546316 | 45562756 |
| chr2 | 45546731 | 45554607 |
| chr2 | 45936718 | 46086362 |
| chr2 | 46001403 | 46010814 |
| chr2 | 46360884 | 46361595 |
| chr2 | 46375689 | 46378172 |
| chr2 | 46576086 | 46581167 |
| chr2 | 47155170 | 47156425 |
| chr2 | 47790926 | 47798204 |
| chr2 | 48328516 | 48346751 |
| chr2 | 48328516 | 48362707 |
| chr2 | 48459716 | 48491170 |
| chr2 | 48498492 | 48514967 |
| chr2 | 53809213 | 53809737 |
| chr2 | 54895272 | 54908352 |
| chr2 | 55205604 | 55206376 |
| chr2 | 55267568 | 55268247 |
| chr2 | 55548855 | 55558968 |
| chr2 | 55558774 | 55591695 |
| chr2 | 55581566 | 55591575 |
| chr2 | 58159649 | 58165874 |
| chr2 | 61010655 | 61011905 |
| chr2 | 61112521 | 61118116 |
| chr2 | 61113769 | 61118116 |
| chr2 | 61162841 | 61164540 |
| chr2 | 61162841 | 61185618 |
| chr2 | 61163051 | 61164540 |
| chr2 | 61178980 | 61184800 |
| chr2 | 61178980 | 61185618 |
| chr2 | 61178980 | 61186497 |
| chr2 | 61186616 | 61187029 |
| chr2 | 61370320 | 61444912 |
| chr2 | 61516341 | 61533903 |
| chr2 | 61520390 | 61526521 |
| chr2 | 61522610 | 61529159 |
| chr2 | 61968968 | 62000982 |
| chr2 | 61972852 | 62000982 |
| chr2 | 61996822 | 62000982 |
| chr2 | 62135830 | 62141360 |
| chr2 | 62222211 | 62225414 |
| chr2 | 62707040 | 62831158 |
| chr2 | 62707040 | 62874532 |
| chr2 | 62707163 | 62831158 |
| chr2 | 62715300 | 62771392 |

|      |          |          |
|------|----------|----------|
| chr2 | 63378385 | 63404088 |
| chr2 | 63378385 | 63439855 |
| chr2 | 63378385 | 63571626 |
| chr2 | 63433744 | 63439855 |
| chr2 | 63433744 | 63571626 |
| chr2 | 63484603 | 63571626 |
| chr2 | 63856305 | 63859391 |
| chr2 | 63856305 | 63862928 |
| chr2 | 63962057 | 64006514 |
| chr2 | 63981645 | 64012676 |
| chr2 | 63983863 | 64001383 |
| chr2 | 65001447 | 65011545 |
| chr2 | 65104733 | 65108803 |
| chr2 | 65246184 | 65265175 |
| chr2 | 68131276 | 68137433 |
| chr2 | 68131276 | 68147567 |
| chr2 | 69043731 | 69077488 |
| chr2 | 69303548 | 69374113 |
| chr2 | 69326170 | 69374113 |
| chr2 | 69431901 | 69439508 |
| chr2 | 69804532 | 69808189 |
| chr2 | 69861277 | 69867801 |
| chr2 | 69916120 | 69938339 |
| chr2 | 70046502 | 70051305 |
| chr2 | 70051202 | 70085903 |
| chr2 | 70212734 | 70230854 |
| chr2 | 70224553 | 70242008 |
| chr2 | 70259359 | 70277874 |
| chr2 | 70988534 | 70993775 |
| chr2 | 71124205 | 71126142 |
| chr2 | 71329539 | 71370005 |
| chr2 | 71424649 | 71426774 |
| chr2 | 72674531 | 72733118 |
| chr2 | 72680613 | 72733118 |
| chr2 | 72718102 | 72721164 |
| chr2 | 73397512 | 73432291 |
| chr2 | 73604915 | 73674905 |
| chr2 | 73938909 | 73946888 |
| chr2 | 73985979 | 74080591 |
| chr2 | 73985979 | 74090047 |
| chr2 | 73985979 | 74099612 |
| chr2 | 74046281 | 74080591 |
| chr2 | 74156417 | 74172752 |
| chr2 | 74675524 | 74711243 |
| chr2 | 75517516 | 75518208 |



|      |           |           |
|------|-----------|-----------|
| chr2 | 75518055  | 75520268  |
| chr2 | 75654735  | 75655278  |
| chr2 | 77874979  | 77951533  |
| chr2 | 84839148  | 84853410  |
| chr2 | 84853313  | 84870785  |
| chr2 | 85013935  | 85028056  |
| chr2 | 85027888  | 85035847  |
| chr2 | 85035015  | 85035847  |
| chr2 | 85356966  | 85364951  |
| chr2 | 85356966  | 85387225  |
| chr2 | 85377343  | 85378023  |
| chr2 | 85644947  | 85649203  |
| chr2 | 85647929  | 85649203  |
| chr2 | 85861180  | 85870258  |
| chr2 | 86125880  | 86127140  |
| chr2 | 86541116  | 86542312  |
| chr2 | 86688231  | 86701949  |
| chr2 | 86740926  | 86773435  |
| chr2 | 8770709   | 8776892   |
| chr2 | 8939820   | 8958642   |
| chr2 | 8943186   | 8974435   |
| chr2 | 8943186   | 8987761   |
| chr2 | 9237832   | 9297445   |
| chr2 | 9287003   | 9297445   |
| chr2 | 9408112   | 9420100   |
| chr2 | 9475986   | 9488392   |
| chr2 | 9509978   | 9543226   |
| chr2 | 95148884  | 95153259  |
| chr2 | 95150196  | 95157439  |
| chr2 | 9558951   | 9588328   |
| chr2 | 9585183   | 9591515   |
| chr2 | 96797011  | 96817502  |
| chr2 | 97844144  | 97862039  |
| chr2 | 98600582  | 98604191  |
| chr2 | 99418827  | 99424899  |
| chr2 | 99449335  | 99451501  |
| chr2 | 9961045   | 9974900   |
| chr3 | 10002716  | 10043864  |
| chr3 | 100082485 | 100147061 |
| chr3 | 101398860 | 101403047 |
| chr3 | 10146513  | 10150818  |
| chr3 | 101579841 | 101585511 |
| chr3 | 101816794 | 101821750 |
| chr3 | 101852084 | 101859465 |
| chr3 | 107285319 | 107291930 |

|      |           |           |
|------|-----------|-----------|
| chr3 | 111903965 | 111920419 |
| chr3 | 111903965 | 111940645 |
| chr3 | 113008170 | 113011165 |
| chr3 | 113013271 | 113017484 |
| chr3 | 11346646  | 11426926  |
| chr3 | 11355420  | 11358612  |
| chr3 | 11355420  | 11380052  |
| chr3 | 11355420  | 11426926  |
| chr3 | 11599891  | 11602022  |
| chr3 | 11768554  | 11829864  |
| chr3 | 119447017 | 119463472 |
| chr3 | 119490718 | 119491492 |
| chr3 | 119863418 | 120093593 |
| chr3 | 119905754 | 120093593 |
| chr3 | 119923372 | 120093593 |
| chr3 | 119947267 | 120093593 |
| chr3 | 120000551 | 120002239 |
| chr3 | 120330618 | 120335953 |
| chr3 | 120770757 | 120776664 |
| chr3 | 121430388 | 121436275 |
| chr3 | 121430388 | 121472164 |
| chr3 | 121430388 | 121476733 |
| chr3 | 121449314 | 121487404 |
| chr3 | 121449314 | 121487509 |
| chr3 | 121632589 | 121633066 |
| chr3 | 121872536 | 121874121 |
| chr3 | 122362967 | 122365466 |
| chr3 | 122565858 | 122572310 |
| chr3 | 122740257 | 122741113 |
| chr3 | 122768700 | 122786490 |
| chr3 | 12297868  | 12312453  |
| chr3 | 123123335 | 123124343 |
| chr3 | 123243811 | 123259589 |
| chr3 | 123526895 | 123528474 |
| chr3 | 124735092 | 124744203 |
| chr3 | 124737567 | 124744203 |
| chr3 | 124737914 | 124738239 |
| chr3 | 124841382 | 124878767 |
| chr3 | 124857231 | 124859446 |
| chr3 | 12489783  | 12506835  |
| chr3 | 12489783  | 12532773  |
| chr3 | 124977858 | 125013117 |
| chr3 | 12499480  | 12503784  |
| chr3 | 12503261  | 12532773  |
| chr3 | 12505153  | 12506835  |

|      |           |           |
|------|-----------|-----------|
| chr3 | 12516610  | 12532773  |
| chr3 | 12519058  | 12532773  |
| chr3 | 125272455 | 125279247 |
| chr3 | 125277725 | 125315053 |
| chr3 | 125279123 | 125323349 |
| chr3 | 12528887  | 12532773  |
| chr3 | 125313307 | 125315053 |
| chr3 | 125331157 | 125338911 |
| chr3 | 126727077 | 126741487 |
| chr3 | 126727077 | 126756858 |
| chr3 | 126733077 | 126741487 |
| chr3 | 126775794 | 126914750 |
| chr3 | 126836555 | 126914750 |
| chr3 | 128035378 | 128087808 |
| chr3 | 128081213 | 128082574 |
| chr3 | 128081213 | 128087808 |
| chr3 | 128081253 | 128087808 |
| chr3 | 128087705 | 128091582 |
| chr3 | 128194558 | 128264781 |
| chr3 | 128262127 | 128303432 |
| chr3 | 128319519 | 128341889 |
| chr3 | 128358216 | 128369276 |
| chr3 | 128620256 | 128622409 |
| chr3 | 128766987 | 128798069 |
| chr3 | 128795359 | 128813471 |
| chr3 | 128806371 | 128813471 |
| chr3 | 129030702 | 129039986 |
| chr3 | 129260400 | 129260597 |
| chr3 | 129389888 | 129397140 |
| chr3 | 129812216 | 129828508 |
| chr3 | 129827802 | 129857405 |
| chr3 | 129827802 | 129880562 |
| chr3 | 129827802 | 129880594 |
| chr3 | 129827802 | 129889104 |
| chr3 | 129857249 | 129880559 |
| chr3 | 129860939 | 129880559 |
| chr3 | 129867009 | 129880559 |
| chr3 | 129880308 | 129880562 |
| chr3 | 129880308 | 129880594 |
| chr3 | 130914349 | 130959341 |
| chr3 | 130917311 | 130941699 |
| chr3 | 131078483 | 131133956 |
| chr3 | 131080426 | 131133956 |
| chr3 | 131462748 | 131471279 |
| chr3 | 132575771 | 132607025 |

|      |           |           |
|------|-----------|-----------|
| chr3 | 132704197 | 132705666 |
| chr3 | 13358025  | 13399861  |
| chr3 | 134155135 | 134195182 |
| chr3 | 134158120 | 134191974 |
| chr3 | 134158120 | 134195182 |
| chr3 | 134173115 | 134195182 |
| chr3 | 136004254 | 136152738 |
| chr3 | 136023026 | 136049361 |
| chr3 | 136297951 | 136370334 |
| chr3 | 136316940 | 136329984 |
| chr3 | 136326802 | 136329984 |
| chr3 | 136326802 | 136333650 |
| chr3 | 136464880 | 136504913 |
| chr3 | 136568764 | 136591549 |
| chr3 | 136945582 | 136958201 |
| chr3 | 136980310 | 136995556 |
| chr3 | 136980465 | 137017166 |
| chr3 | 138355193 | 138373076 |
| chr3 | 138503746 | 138532570 |
| chr3 | 138525489 | 138572984 |
| chr3 | 138542690 | 138572932 |
| chr3 | 138570317 | 138571353 |
| chr3 | 138570317 | 138572984 |
| chr3 | 139398860 | 139423114 |
| chr3 | 139419556 | 139444510 |
| chr3 | 141278341 | 141308407 |
| chr3 | 141368620 | 141405887 |
| chr3 | 141368620 | 141427821 |
| chr3 | 141368620 | 141438365 |
| chr3 | 141368644 | 141369946 |
| chr3 | 141368644 | 141386937 |
| chr3 | 141368644 | 141404031 |
| chr3 | 141396258 | 141413639 |
| chr3 | 141403926 | 141405887 |
| chr3 | 141500887 | 141529802 |
| chr3 | 141509567 | 141529802 |
| chr3 | 141509567 | 141540609 |
| chr3 | 141509567 | 141559995 |
| chr3 | 14181559  | 14198294  |
| chr3 | 141893811 | 141922063 |
| chr3 | 141902135 | 141907274 |
| chr3 | 141913651 | 141925803 |
| chr3 | 142093060 | 142116373 |
| chr3 | 142204216 | 142204788 |
| chr3 | 142311702 | 142318903 |

|      |           |           |
|------|-----------|-----------|
| chr3 | 142736378 | 142762313 |
| chr3 | 142743484 | 142762313 |
| chr3 | 142748371 | 142804630 |
| chr3 | 143985542 | 143989832 |
| chr3 | 143985542 | 143989837 |
| chr3 | 143985542 | 143989847 |
| chr3 | 143985542 | 144048812 |
| chr3 | 148992542 | 148996904 |
| chr3 | 148994146 | 149009402 |
| chr3 | 149140003 | 149172224 |
| chr3 | 149865820 | 149921227 |
| chr3 | 15013588  | 15014174  |
| chr3 | 15016151  | 15017272  |
| chr3 | 150408179 | 150438354 |
| chr3 | 151086501 | 151193666 |
| chr3 | 151112301 | 151127984 |
| chr3 | 151795738 | 151814300 |
| chr3 | 15210801  | 15233973  |
| chr3 | 15411244  | 15414162  |
| chr3 | 15411244  | 15415942  |
| chr3 | 154273721 | 154277718 |
| chr3 | 154274461 | 154277718 |
| chr3 | 155763496 | 155767669 |
| chr3 | 155775700 | 155804173 |
| chr3 | 155829855 | 155834041 |
| chr3 | 155890667 | 155903960 |
| chr3 | 155893517 | 155937881 |
| chr3 | 156542164 | 156549003 |
| chr3 | 156677656 | 156680555 |
| chr3 | 156694019 | 156696424 |
| chr3 | 156694021 | 156696025 |
| chr3 | 15670109  | 15709736  |
| chr3 | 156852767 | 156888397 |
| chr3 | 15707923  | 15797144  |
| chr3 | 157101934 | 157122975 |
| chr3 | 15734690  | 15737233  |
| chr3 | 15766233  | 15814309  |
| chr3 | 15795222  | 15814309  |
| chr3 | 158122102 | 158128292 |
| chr3 | 158122102 | 158132263 |
| chr3 | 158122102 | 158146775 |
| chr3 | 158122102 | 158154049 |
| chr3 | 158122102 | 158225733 |
| chr3 | 158652095 | 158691648 |
| chr3 | 158681994 | 158691648 |

|      |           |           |
|------|-----------|-----------|
| chr3 | 158690162 | 158691648 |
| chr3 | 159812757 | 159866281 |
| chr3 | 160276583 | 160282613 |
| chr3 | 160507692 | 160508269 |
| chr3 | 16271658  | 16271995  |
| chr3 | 16271658  | 16272321  |
| chr3 | 16286341  | 16303592  |
| chr3 | 16294855  | 16303592  |
| chr3 | 167554682 | 167566894 |
| chr3 | 167575917 | 167658326 |
| chr3 | 167653260 | 167658326 |
| chr3 | 169381186 | 169435769 |
| chr3 | 170097171 | 170122744 |
| chr3 | 170097171 | 170149244 |
| chr3 | 170097171 | 170178938 |
| chr3 | 170258754 | 170263429 |
| chr3 | 170359698 | 170364466 |
| chr3 | 170381018 | 170381341 |
| chr3 | 170418387 | 170419292 |
| chr3 | 170865317 | 170868390 |
| chr3 | 172060709 | 172133546 |
| chr3 | 172079353 | 172112590 |
| chr3 | 172112451 | 172153841 |
| chr3 | 172133470 | 172153841 |
| chr3 | 172247532 | 172265368 |
| chr3 | 172251259 | 172262083 |
| chr3 | 172755482 | 172756503 |
| chr3 | 172760160 | 172774022 |
| chr3 | 172760160 | 172783909 |
| chr3 | 172797219 | 172816837 |
| chr3 | 17508473  | 17543465  |
| chr3 | 17508473  | 17562142  |
| chr3 | 17508473  | 17576549  |
| chr3 | 17508473  | 17586466  |
| chr3 | 17508473  | 17586557  |
| chr3 | 17508473  | 17669756  |
| chr3 | 17508473  | 17672705  |
| chr3 | 17562018  | 17623913  |
| chr3 | 17586352  | 17623913  |
| chr3 | 179250742 | 179251577 |
| chr3 | 179761111 | 179785873 |
| chr3 | 180956328 | 180970358 |
| chr3 | 182940358 | 182965753 |
| chr3 | 183205875 | 183208665 |
| chr3 | 183338799 | 183354223 |

|      |           |           |
|------|-----------|-----------|
| chr3 | 183364254 | 183389779 |
| chr3 | 183710153 | 183728851 |
| chr3 | 183710168 | 183728851 |
| chr3 | 183716346 | 183752253 |
| chr3 | 183806865 | 183830692 |
| chr3 | 183833491 | 183868024 |
| chr3 | 183840569 | 183856551 |
| chr3 | 183856431 | 183868060 |
| chr3 | 183862696 | 183868060 |
| chr3 | 184165109 | 184166265 |
| chr3 | 184816773 | 184834742 |
| chr3 | 184824146 | 184849195 |
| chr3 | 185645341 | 185652168 |
| chr3 | 186784696 | 186784935 |
| chr3 | 186804276 | 186804724 |
| chr3 | 186963784 | 186975791 |
| chr3 | 186963784 | 186996673 |
| chr3 | 187038394 | 187051346 |
| chr3 | 188704369 | 188708393 |
| chr3 | 188755057 | 188760282 |
| chr3 | 188758631 | 188760282 |
| chr3 | 190520489 | 190564353 |
| chr3 | 191380158 | 191396033 |
| chr3 | 192333701 | 192335464 |
| chr3 | 192360427 | 192402696 |
| chr3 | 192727180 | 192728554 |
| chr3 | 192727180 | 192738983 |
| chr3 | 192727180 | 192745356 |
| chr3 | 193603499 | 193662962 |
| chr3 | 194412198 | 194427252 |
| chr3 | 194459470 | 194484410 |
| chr3 | 195320700 | 195357784 |
| chr3 | 195333027 | 195367736 |
| chr3 | 195516841 | 195524896 |
| chr3 | 195683751 | 195689438 |
| chr3 | 195685817 | 195689438 |
| chr3 | 195688532 | 195689438 |
| chr3 | 195688532 | 195699207 |
| chr3 | 195696360 | 195708841 |
| chr3 | 195729055 | 195729739 |
| chr3 | 195984111 | 195987127 |
| chr3 | 196237446 | 196242640 |
| chr3 | 196237791 | 196239735 |
| chr3 | 196238918 | 196239546 |
| chr3 | 196242121 | 196242561 |

|      |           |           |
|------|-----------|-----------|
| chr3 | 196306942 | 196327591 |
| chr3 | 196368027 | 196483891 |
| chr3 | 196471639 | 196475312 |
| chr3 | 196471639 | 196483891 |
| chr3 | 196471978 | 196475312 |
| chr3 | 196475230 | 196486628 |
| chr3 | 196486532 | 196487578 |
| chr3 | 196722414 | 196733815 |
| chr3 | 196724042 | 196731092 |
| chr3 | 196765920 | 196782833 |
| chr3 | 196779419 | 196782833 |
| chr3 | 196782625 | 196783566 |
| chr3 | 196927795 | 196932023 |
| chr3 | 196927795 | 196932535 |
| chr3 | 196929683 | 196930796 |
| chr3 | 196930812 | 196932023 |
| chr3 | 197078437 | 197119530 |
| chr3 | 197090911 | 197099723 |
| chr3 | 197115926 | 197130978 |
| chr3 | 197531939 | 197532522 |
| chr3 | 197619739 | 197624720 |
| chr3 | 197704541 | 197706680 |
| chr3 | 197756425 | 197763638 |
| chr3 | 197763465 | 197768587 |
| chr3 | 197763465 | 197770244 |
| chr3 | 197814907 | 197875775 |
| chr3 | 197829563 | 197871462 |
| chr3 | 197831959 | 197839397 |
| chr3 | 197858833 | 197875775 |
| chr3 | 197865422 | 197871462 |
| chr3 | 197866111 | 197871462 |
| chr3 | 197866111 | 197875775 |
| chr3 | 197870159 | 197871462 |
| chr3 | 197870159 | 197875775 |
| chr3 | 198043231 | 198077288 |
| chr3 | 19970439  | 19978403  |
| chr3 | 19970547  | 19976169  |
| chr3 | 19970547  | 19978403  |
| chr3 | 20071363  | 20072459  |
| chr3 | 20071583  | 20072459  |
| chr3 | 20161108  | 20178347  |
| chr3 | 23589733  | 23595250  |
| chr3 | 23918576  | 23919069  |
| chr3 | 24228937  | 24238081  |
| chr3 | 25628846  | 25632520  |



|      |          |          |
|------|----------|----------|
| chr3 | 25637214 | 25645470 |
| chr3 | 25643693 | 25645470 |
| chr3 | 27376715 | 27424152 |
| chr3 | 27379248 | 27403301 |
| chr3 | 27397683 | 27483627 |
| chr3 | 28251711 | 28263380 |
| chr3 | 28263290 | 28294529 |
| chr3 | 28263290 | 28298350 |
| chr3 | 28263290 | 28319625 |
| chr3 | 29372874 | 29434915 |
| chr3 | 29739719 | 29768350 |
| chr3 | 29924296 | 29936196 |
| chr3 | 3137259  | 3148187  |
| chr3 | 31683779 | 31702508 |
| chr3 | 3172505  | 3174261  |
| chr3 | 31876432 | 31916416 |
| chr3 | 32357372 | 32370026 |
| chr3 | 32437954 | 32442013 |
| chr3 | 32441839 | 32454542 |
| chr3 | 32541092 | 32545965 |
| chr3 | 32715991 | 32717237 |
| chr3 | 32737409 | 32751025 |
| chr3 | 32996795 | 32997344 |
| chr3 | 33046119 | 33077237 |
| chr3 | 33120362 | 33124579 |
| chr3 | 33132554 | 33136150 |
| chr3 | 33358966 | 33385728 |
| chr3 | 33423530 | 33425741 |
| chr3 | 33619602 | 33640143 |
| chr3 | 33670642 | 33696933 |
| chr3 | 33683265 | 33696933 |
| chr3 | 37047518 | 37051710 |
| chr3 | 37075023 | 37096766 |
| chr3 | 37129062 | 37154168 |
| chr3 | 37281984 | 37302332 |
| chr3 | 37379041 | 37416724 |
| chr3 | 37417042 | 37417492 |
| chr3 | 38252392 | 38252789 |
| chr3 | 38395563 | 38397045 |
| chr3 | 38500089 | 38506968 |
| chr3 | 39412061 | 39412244 |
| chr3 | 40309870 | 40311571 |
| chr3 | 40461406 | 40462248 |
| chr3 | 40516547 | 40530316 |
| chr3 | 41705056 | 41747865 |

|      |          |          |
|------|----------|----------|
| chr3 | 41875054 | 41883952 |
| chr3 | 42087103 | 42125614 |
| chr3 | 4361975  | 4376389  |
| chr3 | 4362038  | 4376389  |
| chr3 | 44448560 | 44458364 |
| chr3 | 44641899 | 44646657 |
| chr3 | 44827094 | 44831018 |
| chr3 | 44829948 | 44831018 |
| chr3 | 44943293 | 44945292 |
| chr3 | 45110472 | 45118618 |
| chr3 | 4670757  | 4685206  |
| chr3 | 47169168 | 47174263 |
| chr3 | 47395086 | 47396217 |
| chr3 | 47408490 | 47408754 |
| chr3 | 47434924 | 47443091 |
| chr3 | 47435007 | 47466447 |
| chr3 | 47442871 | 47466447 |
| chr3 | 47650690 | 47670717 |
| chr3 | 47658557 | 47678311 |
| chr3 | 47714414 | 47718430 |
| chr3 | 47772467 | 47772936 |
| chr3 | 47824766 | 47827477 |
| chr3 | 47994423 | 47998879 |
| chr3 | 47998637 | 48065951 |
| chr3 | 48290272 | 48298523 |
| chr3 | 48501136 | 48511302 |
| chr3 | 48548138 | 48550234 |
| chr3 | 48548531 | 48550234 |
| chr3 | 49032182 | 49033212 |
| chr3 | 49126190 | 49126364 |
| chr3 | 49295545 | 49300691 |
| chr3 | 49335019 | 49335596 |
| chr3 | 49368427 | 49373342 |
| chr3 | 49373218 | 49375591 |
| chr3 | 49375433 | 49376178 |
| chr3 | 49699475 | 49700709 |
| chr3 | 49967197 | 50058562 |
| chr3 | 49967332 | 49975392 |
| chr3 | 50046715 | 50054395 |
| chr3 | 50115980 | 50117053 |
| chr3 | 50175095 | 50175416 |
| chr3 | 50347575 | 50350022 |
| chr3 | 51137442 | 51146630 |
| chr3 | 51146548 | 51174756 |
| chr3 | 51470928 | 51492488 |

|      |          |          |
|------|----------|----------|
| chr3 | 51470928 | 51492513 |
| chr3 | 51540363 | 51590559 |
| chr3 | 51541497 | 51590559 |
| chr3 | 51541588 | 51590559 |
| chr3 | 51572821 | 51590559 |
| chr3 | 51681341 | 51684634 |
| chr3 | 51684412 | 51684884 |
| chr3 | 5192269  | 5208263  |
| chr3 | 5195208  | 5215903  |
| chr3 | 51960666 | 51960865 |
| chr3 | 52411028 | 52414587 |
| chr3 | 52490231 | 52490678 |
| chr3 | 52563282 | 52564233 |
| chr3 | 52563282 | 52579199 |
| chr3 | 52678499 | 52679726 |
| chr3 | 52730324 | 52741499 |
| chr3 | 52743351 | 52758919 |
| chr3 | 52943352 | 53043254 |
| chr3 | 52954316 | 52971649 |
| chr3 | 52969100 | 53043254 |
| chr3 | 53342143 | 53347532 |
| chr3 | 55888388 | 55950560 |
| chr3 | 56560957 | 56571302 |
| chr3 | 56565637 | 56567053 |
| chr3 | 56569312 | 56571302 |
| chr3 | 56572336 | 56594028 |
| chr3 | 56592969 | 56598300 |
| chr3 | 56623643 | 56628614 |
| chr3 | 56633027 | 56633966 |
| chr3 | 57007181 | 57035176 |
| chr3 | 57249359 | 57269751 |
| chr3 | 57256956 | 57276459 |
| chr3 | 57569686 | 57584007 |
| chr3 | 57825760 | 57831530 |
| chr3 | 57864806 | 57865292 |
| chr3 | 58498712 | 58501709 |
| chr3 | 58937647 | 58966822 |
| chr3 | 61617661 | 61748982 |
| chr3 | 61748877 | 61769416 |
| chr3 | 61989624 | 62015932 |
| chr3 | 62000751 | 62078258 |
| chr3 | 62003348 | 62026463 |
| chr3 | 62009467 | 62078258 |
| chr3 | 62218850 | 62220439 |
| chr3 | 63826823 | 63839773 |

|      |          |          |
|------|----------|----------|
| chr3 | 63834062 | 63838499 |
| chr3 | 63834062 | 63839773 |
| chr3 | 63864897 | 63898497 |
| chr3 | 63979914 | 63999651 |
| chr3 | 63982938 | 63999651 |
| chr3 | 64004325 | 64006068 |
| chr3 | 65609743 | 65622088 |
| chr3 | 67400730 | 67409031 |
| chr3 | 67400730 | 67409034 |
| chr3 | 67559500 | 67609596 |
| chr3 | 67609454 | 67637839 |
| chr3 | 67667257 | 67671004 |
| chr3 | 69089811 | 69102056 |
| chr3 | 69099557 | 69102056 |
| chr3 | 71453115 | 71493555 |
| chr3 | 71468695 | 71493555 |
| chr3 | 71493425 | 71501988 |
| chr3 | 72708843 | 72750836 |
| chr3 | 72781304 | 72793036 |
| chr3 | 72781304 | 72842402 |
| chr3 | 72832368 | 72842425 |
| chr3 | 72832368 | 72844453 |
| chr3 | 72841044 | 72844453 |
| chr3 | 73046356 | 73047356 |
| chr3 | 73059036 | 73065575 |
| chr3 | 81642780 | 81753280 |
| chr3 | 81670837 | 81753280 |
| chr3 | 81699972 | 81705613 |
| chr3 | 8742458  | 8753224  |
| chr3 | 8752883  | 8768591  |
| chr3 | 9383198  | 9384825  |
| chr3 | 9390289  | 9391826  |
| chr3 | 93995877 | 94003908 |
| chr3 | 9421322  | 9435906  |
| chr3 | 9421478  | 9453868  |
| chr3 | 9689963  | 9702064  |
| chr3 | 96952114 | 96987993 |
| chr3 | 96972606 | 96987993 |
| chr3 | 96987329 | 96990508 |
| chr3 | 97207775 | 97244287 |
| chr3 | 97877578 | 97886767 |
| chr3 | 97933693 | 97943570 |
| chr3 | 98521132 | 98522920 |
| chr3 | 98876666 | 98881767 |
| chr3 | 98881539 | 98889424 |

|      |           |           |
|------|-----------|-----------|
| chr3 | 98881539  | 98892606  |
| chr3 | 9969718   | 9981747   |
| chr4 | 10097710  | 10108395  |
| chr4 | 101193558 | 101196116 |
| chr4 | 101195915 | 101250373 |
| chr4 | 102304316 | 102315739 |
| chr4 | 102304316 | 102315742 |
| chr4 | 102304316 | 102324563 |
| chr4 | 102510879 | 102529914 |
| chr4 | 102714437 | 102730736 |
| chr4 | 102714437 | 102734571 |
| chr4 | 102714437 | 102736435 |
| chr4 | 102722870 | 102730736 |
| chr4 | 103195265 | 103195919 |
| chr4 | 103436934 | 103453812 |
| chr4 | 105177591 | 105261320 |
| chr4 | 105261147 | 105399164 |
| chr4 | 105424195 | 105434161 |
| chr4 | 105424195 | 105441148 |
| chr4 | 105686691 | 105689280 |
| chr4 | 106095481 | 106197014 |
| chr4 | 107895309 | 107910609 |
| chr4 | 108018445 | 108019666 |
| chr4 | 109494614 | 109500054 |
| chr4 | 109499903 | 109533685 |
| chr4 | 109516567 | 109521626 |
| chr4 | 109531384 | 109539667 |
| chr4 | 109648483 | 109664394 |
| chr4 | 109708454 | 109718759 |
| chr4 | 110425960 | 110520366 |
| chr4 | 1108342   | 1111821   |
| chr4 | 112808902 | 112818264 |
| chr4 | 113609151 | 113679496 |
| chr4 | 118620413 | 118628226 |
| chr4 | 119457970 | 119462979 |
| chr4 | 119488644 | 119497903 |
| chr4 | 119493332 | 119512970 |
| chr4 | 120903260 | 120907557 |
| chr4 | 1212786   | 1241519   |
| chr4 | 121820541 | 121835283 |
| chr4 | 1228198   | 1241515   |
| chr4 | 122876320 | 122892296 |
| chr4 | 122927633 | 122984615 |
| chr4 | 122927636 | 122947488 |
| chr4 | 122927636 | 122979386 |

|      |           |           |
|------|-----------|-----------|
| chr4 | 122933438 | 122949594 |
| chr4 | 122935713 | 122952270 |
| chr4 | 123019161 | 123028395 |
| chr4 | 124500895 | 124522204 |
| chr4 | 124500895 | 124556510 |
| chr4 | 124565    | 131505    |
| chr4 | 124663284 | 124678905 |
| chr4 | 127669038 | 127687867 |
| chr4 | 127982938 | 128030672 |
| chr4 | 128017362 | 128021238 |
| chr4 | 128021    | 212781    |
| chr4 | 128162193 | 128282740 |
| chr4 | 128292933 | 128483487 |
| chr4 | 128460326 | 128470549 |
| chr4 | 128816366 | 128852268 |
| chr4 | 129039040 | 129093148 |
| chr4 | 129724509 | 129727033 |
| chr4 | 130787    | 132602    |
| chr4 | 131409    | 218778    |
| chr4 | 13266911  | 13381594  |
| chr4 | 133075343 | 133096883 |
| chr4 | 13332384  | 13381594  |
| chr4 | 13371794  | 13426354  |
| chr4 | 13376544  | 13387694  |
| chr4 | 13376544  | 13425227  |
| chr4 | 13376544  | 13428299  |
| chr4 | 13425109  | 13460828  |
| chr4 | 139043073 | 139045389 |
| chr4 | 139116648 | 139125329 |
| chr4 | 139125163 | 139139497 |
| chr4 | 139125163 | 139151980 |
| chr4 | 139125163 | 139168042 |
| chr4 | 139137629 | 139139497 |
| chr4 | 139137629 | 139151980 |
| chr4 | 139533164 | 139548119 |
| chr4 | 140525419 | 140549964 |
| chr4 | 142383961 | 142405324 |
| chr4 | 142402937 | 142433830 |
| chr4 | 143543469 | 143543972 |
| chr4 | 143858961 | 143912638 |
| chr4 | 143861141 | 143979952 |
| chr4 | 143912539 | 144004680 |
| chr4 | 145041316 | 145096111 |
| chr4 | 145886032 | 145892415 |
| chr4 | 146488065 | 146510049 |

|      |           |           |
|------|-----------|-----------|
| chr4 | 146509171 | 146510049 |
| chr4 | 147628360 | 147634581 |
| chr4 | 147633764 | 147634558 |
| chr4 | 147633764 | 147634581 |
| chr4 | 147742039 | 147822957 |
| chr4 | 147854675 | 147866816 |
| chr4 | 147854675 | 147875150 |
| chr4 | 147854675 | 147881932 |
| chr4 | 147854675 | 147966839 |
| chr4 | 147857552 | 147891595 |
| chr4 | 147906637 | 147913178 |
| chr4 | 148063147 | 148072179 |
| chr4 | 148064415 | 148072179 |
| chr4 | 150415437 | 150439097 |
| chr4 | 151415723 | 151482648 |
| chr4 | 151424094 | 151482648 |
| chr4 | 151454700 | 151458433 |
| chr4 | 152382188 | 152412529 |
| chr4 | 152411302 | 152451776 |
| chr4 | 152411302 | 152469988 |
| chr4 | 152809672 | 152888307 |
| chr4 | 153315484 | 153358622 |
| chr4 | 15550823  | 15601421  |
| chr4 | 15567786  | 15569264  |
| chr4 | 15627884  | 15659922  |
| chr4 | 156850220 | 156854606 |
| chr4 | 158680466 | 158708552 |
| chr4 | 158851320 | 158868349 |
| chr4 | 159238808 | 159304473 |
| chr4 | 159304392 | 159330010 |
| chr4 | 16238770  | 16323036  |
| chr4 | 163158224 | 163164391 |
| chr4 | 165079716 | 165103096 |
| chr4 | 165218024 | 165238899 |
| chr4 | 165219643 | 165299656 |
| chr4 | 165219933 | 165277543 |
| chr4 | 165238777 | 165240464 |
| chr4 | 168889579 | 168925078 |
| chr4 | 169002070 | 169019854 |
| chr4 | 169149240 | 169156679 |
| chr4 | 169477123 | 169484514 |
| chr4 | 173195594 | 173248440 |
| chr4 | 173224309 | 173248440 |
| chr4 | 173232451 | 173248440 |
| chr4 | 176148132 | 176179632 |

|      |           |           |
|------|-----------|-----------|
| chr4 | 17623600  | 17625845  |
| chr4 | 176699162 | 176729746 |
| chr4 | 176708968 | 176729746 |
| chr4 | 176711498 | 176731524 |
| chr4 | 176711498 | 176740765 |
| chr4 | 176727777 | 176731524 |
| chr4 | 176727777 | 176740765 |
| chr4 | 177353307 | 177358258 |
| chr4 | 17794930  | 17845901  |
| chr4 | 17804403  | 17805225  |
| chr4 | 17961902  | 18009978  |
| chr4 | 182769280 | 182915575 |
| chr4 | 182837570 | 182915575 |
| chr4 | 182874569 | 182915575 |
| chr4 | 182877510 | 182894605 |
| chr4 | 182877510 | 182915575 |
| chr4 | 182891288 | 182915575 |
| chr4 | 182891348 | 182894605 |
| chr4 | 182891348 | 182915575 |
| chr4 | 182891402 | 182894605 |
| chr4 | 182891402 | 182915575 |
| chr4 | 183142932 | 183193708 |
| chr4 | 183173557 | 183193708 |
| chr4 | 183183402 | 183193708 |
| chr4 | 183188263 | 183209025 |
| chr4 | 184427520 | 184429070 |
| chr4 | 184775369 | 184776983 |
| chr4 | 185188946 | 185191212 |
| chr4 | 185188950 | 185191212 |
| chr4 | 185213360 | 185267155 |
| chr4 | 185213360 | 185346650 |
| chr4 | 185247293 | 185264498 |
| chr4 | 188101055 | 188105429 |
| chr4 | 188101055 | 188105590 |
| chr4 | 1892165   | 1893909   |
| chr4 | 1892165   | 1901251   |
| chr4 | 1892165   | 1904378   |
| chr4 | 1892165   | 1918623   |
| chr4 | 1892165   | 1935262   |
| chr4 | 1900625   | 1942565   |
| chr4 | 1901094   | 1904378   |
| chr4 | 1912090   | 1918623   |
| chr4 | 1974862   | 1979189   |
| chr4 | 1974862   | 1982551   |
| chr4 | 201080    | 211885    |



|      |          |          |
|------|----------|----------|
| chr4 | 201080   | 212781   |
| chr4 | 20393349 | 20394605 |
| chr4 | 2063759  | 2064664  |
| chr4 | 20704465 | 20727397 |
| chr4 | 20716106 | 20727397 |
| chr4 | 211658   | 212781   |
| chr4 | 2186788  | 2213126  |
| chr4 | 22327459 | 22335167 |
| chr4 | 22335040 | 22392690 |
| chr4 | 22341019 | 22392690 |
| chr4 | 22375729 | 22392690 |
| chr4 | 22389087 | 22424348 |
| chr4 | 22397990 | 22402799 |
| chr4 | 22401391 | 22402799 |
| chr4 | 22447439 | 22478233 |
| chr4 | 22461736 | 22478233 |
| chr4 | 2494563  | 2497121  |
| chr4 | 2596083  | 2639859  |
| chr4 | 2596154  | 2646832  |
| chr4 | 2625261  | 2626577  |
| chr4 | 2625261  | 2631169  |
| chr4 | 2625261  | 2639859  |
| chr4 | 2625261  | 2646832  |
| chr4 | 2638816  | 2639859  |
| chr4 | 2638816  | 2646832  |
| chr4 | 2655027  | 2663288  |
| chr4 | 2655027  | 2672372  |
| chr4 | 2657802  | 2683115  |
| chr4 | 26748410 | 26769852 |
| chr4 | 2937751  | 2938792  |
| chr4 | 3080922  | 3107423  |
| chr4 | 3086938  | 3087498  |
| chr4 | 30920152 | 30950215 |
| chr4 | 3314790  | 3318051  |
| chr4 | 3314790  | 3343053  |
| chr4 | 3342936  | 3343394  |
| chr4 | 36145345 | 36151044 |
| chr4 | 37902002 | 37929982 |
| chr4 | 38035587 | 38073387 |
| chr4 | 38611323 | 38614708 |
| chr4 | 38986335 | 38994424 |
| chr4 | 39605070 | 39612110 |
| chr4 | 39731010 | 39745810 |
| chr4 | 39837477 | 39842056 |
| chr4 | 39926774 | 39931629 |

|      |          |          |
|------|----------|----------|
| chr4 | 39926774 | 39933433 |
| chr4 | 40152779 | 40154267 |
| chr4 | 40881283 | 40893411 |
| chr4 | 41013582 | 41018441 |
| chr4 | 41093023 | 41100750 |
| chr4 | 41142212 | 41143142 |
| chr4 | 41142986 | 41145230 |
| chr4 | 41142986 | 41162074 |
| chr4 | 41142986 | 41177690 |
| chr4 | 41257009 | 41257587 |
| chr4 | 41257009 | 41257590 |
| chr4 | 41374584 | 41524478 |
| chr4 | 41438162 | 41524478 |
| chr4 | 41453564 | 41524478 |
| chr4 | 41494535 | 41551395 |
| chr4 | 41524408 | 41633808 |
| chr4 | 41978133 | 42001780 |
| chr4 | 4236875  | 4246343  |
| chr4 | 4298615  | 4300097  |
| chr4 | 435769   | 472701   |
| chr4 | 4542527  | 4649542  |
| chr4 | 4611493  | 4649542  |
| chr4 | 4648976  | 4653757  |
| chr4 | 4648976  | 4690036  |
| chr4 | 47545402 | 47563765 |
| chr4 | 48377895 | 48394653 |
| chr4 | 48684672 | 48687160 |
| chr4 | 48684672 | 48780173 |
| chr4 | 505717   | 506866   |
| chr4 | 51860542 | 51877854 |
| chr4 | 51860542 | 51891851 |
| chr4 | 51863436 | 51887244 |
| chr4 | 51863436 | 51893227 |
| chr4 | 51863436 | 51914078 |
| chr4 | 52873815 | 52885866 |
| chr4 | 53145332 | 53186486 |
| chr4 | 55475171 | 55489465 |
| chr4 | 55877563 | 55890386 |
| chr4 | 56196343 | 56272492 |
| chr4 | 56403039 | 56406618 |
| chr4 | 56459371 | 56459618 |
| chr4 | 56478378 | 56480977 |
| chr4 | 56500535 | 56505509 |
| chr4 | 56596499 | 56604222 |
| chr4 | 56963455 | 56964526 |

|      |          |          |
|------|----------|----------|
| chr4 | 56978908 | 56990898 |
| chr4 | 6333561  | 6348746  |
| chr4 | 64926591 | 65008912 |
| chr4 | 673302   | 674317   |
| chr4 | 67720421 | 67730170 |
| chr4 | 6996324  | 6997194  |
| chr4 | 7004924  | 7006602  |
| chr4 | 70911921 | 70959040 |
| chr4 | 70942822 | 70959040 |
| chr4 | 73053491 | 73068133 |
| chr4 | 73168928 | 73177533 |
| chr4 | 73177379 | 73191074 |
| chr4 | 73177379 | 73192339 |
| chr4 | 73177379 | 73235080 |
| chr4 | 74173408 | 74281550 |
| chr4 | 74174505 | 74261209 |
| chr4 | 75482478 | 75494179 |
| chr4 | 77040620 | 77066405 |
| chr4 | 77048448 | 77066405 |
| chr4 | 79085226 | 79086262 |
| chr4 | 80286324 | 80287481 |
| chr4 | 80286324 | 80295627 |
| chr4 | 80287336 | 80362884 |
| chr4 | 80295558 | 80335879 |
| chr4 | 80295558 | 80362884 |
| chr4 | 80301282 | 80362884 |
| chr4 | 80321340 | 80362884 |
| chr4 | 80335692 | 80362884 |
| chr4 | 80335743 | 80362884 |
| chr4 | 80362753 | 80376917 |
| chr4 | 80566341 | 80583183 |
| chr4 | 80790374 | 80870135 |
| chr4 | 82354048 | 82359639 |
| chr4 | 82427189 | 82429412 |
| chr4 | 82427591 | 82428017 |
| chr4 | 82961389 | 82979006 |
| chr4 | 82970326 | 82981475 |
| chr4 | 83262588 | 83273617 |
| chr4 | 84713158 | 84716992 |
| chr4 | 84829003 | 84879494 |
| chr4 | 84836928 | 84879494 |
| chr4 | 84849901 | 84879494 |
| chr4 | 84879405 | 84932363 |
| chr4 | 84894824 | 84897010 |
| chr4 | 84896910 | 84898597 |

|      |           |           |
|------|-----------|-----------|
| chr4 | 84896910  | 84912319  |
| chr4 | 87020505  | 87047594  |
| chr4 | 87159457  | 87185799  |
| chr4 | 87371411  | 87374830  |
| chr4 | 88265000  | 88271258  |
| chr4 | 882839    | 883314    |
| chr4 | 88781164  | 88855308  |
| chr4 | 88990972  | 89009078  |
| chr4 | 89008950  | 89020669  |
| chr4 | 89008950  | 89029649  |
| chr4 | 97703858  | 97712814  |
| chr4 | 98105952  | 98134425  |
| chr4 | 99908700  | 99923185  |
| chr4 | 99928541  | 99930621  |
| chr5 | 10213490  | 10227647  |
| chr5 | 10223958  | 10227647  |
| chr5 | 10250297  | 10260911  |
| chr5 | 10260911  | 10261518  |
| chr5 | 102990271 | 103029089 |
| chr5 | 103190841 | 103212007 |
| chr5 | 103265907 | 103276397 |
| chr5 | 103275896 | 103276397 |
| chr5 | 10618332  | 10619378  |
| chr5 | 108157107 | 108348530 |
| chr5 | 108184941 | 108186247 |
| chr5 | 108186116 | 108227601 |
| chr5 | 108186116 | 108294904 |
| chr5 | 108224120 | 108344026 |
| chr5 | 108301975 | 108348530 |
| chr5 | 108341926 | 108348530 |
| chr5 | 108341926 | 108367953 |
| chr5 | 108768092 | 108770709 |
| chr5 | 108768092 | 108815404 |
| chr5 | 108770499 | 108798389 |
| chr5 | 108798123 | 108799985 |
| chr5 | 108798123 | 108820524 |
| chr5 | 108832769 | 108878440 |
| chr5 | 108897658 | 108898132 |
| chr5 | 109698435 | 109755456 |
| chr5 | 109706482 | 109716264 |
| chr5 | 109713495 | 109755456 |
| chr5 | 109713519 | 109796127 |
| chr5 | 109729310 | 109774965 |
| chr5 | 109767534 | 109804277 |
| chr5 | 109781395 | 109795046 |

|      |           |           |
|------|-----------|-----------|
| chr5 | 109781395 | 109796803 |
| chr5 | 109781395 | 109804277 |
| chr5 | 109781395 | 109830980 |
| chr5 | 109817272 | 109830980 |
| chr5 | 111416505 | 111449203 |
| chr5 | 112900725 | 112902518 |
| chr5 | 112981041 | 113001674 |
| chr5 | 112985834 | 113013536 |
| chr5 | 112992153 | 113004077 |
| chr5 | 115200163 | 115222008 |
| chr5 | 115204561 | 115222008 |
| chr5 | 115831693 | 115837764 |
| chr5 | 115831693 | 115840612 |
| chr5 | 115852978 | 115870128 |
| chr5 | 115866669 | 115913513 |
| chr5 | 115866669 | 115968136 |
| chr5 | 116131183 | 116134178 |
| chr5 | 116134067 | 116279151 |
| chr5 | 116291516 | 116298392 |
| chr5 | 116291516 | 116303683 |
| chr5 | 116292450 | 116318300 |
| chr5 | 116303529 | 116449817 |
| chr5 | 116446163 | 116449817 |
| chr5 | 118928536 | 118946328 |
| chr5 | 120605176 | 120618565 |
| chr5 | 120617094 | 120642455 |
| chr5 | 122931860 | 122946159 |
| chr5 | 122995478 | 123002004 |
| chr5 | 122998207 | 123002004 |
| chr5 | 123346604 | 123399284 |
| chr5 | 123532568 | 123557564 |
| chr5 | 126899185 | 126918227 |
| chr5 | 1278635   | 1282624   |
| chr5 | 128138823 | 128139824 |
| chr5 | 129104955 | 129142006 |
| chr5 | 131255094 | 131316144 |
| chr5 | 131313848 | 131316144 |
| chr5 | 131359222 | 131359547 |
| chr5 | 131508070 | 131532194 |
| chr5 | 131548046 | 131624334 |
| chr5 | 131592382 | 131624334 |
| chr5 | 131695404 | 131699002 |
| chr5 | 131744563 | 131747515 |
| chr5 | 132927120 | 132937740 |
| chr5 | 134074764 | 134174022 |

|      |           |           |
|------|-----------|-----------|
| chr5 | 134157706 | 134174022 |
| chr5 | 134158454 | 134174007 |
| chr5 | 134158454 | 134174514 |
| chr5 | 134197324 | 134206131 |
| chr5 | 134197775 | 134206131 |
| chr5 | 134205921 | 134221412 |
| chr5 | 134380718 | 134390363 |
| chr5 | 134388324 | 134390363 |
| chr5 | 134390224 | 134393891 |
| chr5 | 134777573 | 134785515 |
| chr5 | 134887694 | 134922115 |
| chr5 | 134908829 | 134970092 |
| chr5 | 134910334 | 134975324 |
| chr5 | 134969938 | 134975324 |
| chr5 | 135052453 | 135075388 |
| chr5 | 135074416 | 135174172 |
| chr5 | 135147082 | 135174172 |
| chr5 | 135172499 | 135174172 |
| chr5 | 136147835 | 136163391 |
| chr5 | 137677544 | 137720863 |
| chr5 | 137952627 | 137963176 |
| chr5 | 138017994 | 138018514 |
| chr5 | 138168112 | 138168469 |
| chr5 | 138319218 | 138331686 |
| chr5 | 138372683 | 138381590 |
| chr5 | 138556893 | 138557401 |
| chr5 | 138858311 | 138904441 |
| chr5 | 138947404 | 138951884 |
| chr5 | 138951360 | 138951787 |
| chr5 | 139042600 | 139051046 |
| chr5 | 139121034 | 139128052 |
| chr5 | 139121034 | 139133471 |
| chr5 | 139278326 | 139280058 |
| chr5 | 139325295 | 139326284 |
| chr5 | 139585412 | 139600435 |
| chr5 | 139600371 | 139627059 |
| chr5 | 139620442 | 139623461 |
| chr5 | 139623367 | 139627059 |
| chr5 | 139880855 | 139900326 |
| chr5 | 140167364 | 140167863 |
| chr5 | 140189063 | 140194652 |
| chr5 | 140438502 | 140449305 |
| chr5 | 140438502 | 140464776 |
| chr5 | 140472238 | 140487060 |
| chr5 | 140472238 | 140491290 |

|      |           |           |
|------|-----------|-----------|
| chr5 | 140696201 | 140696499 |
| chr5 | 141354470 | 141357621 |
| chr5 | 141354470 | 141362556 |
| chr5 | 141369870 | 141372809 |
| chr5 | 141409267 | 141410620 |
| chr5 | 14147952  | 14280436  |
| chr5 | 141571436 | 141571925 |
| chr5 | 141581914 | 141583615 |
| chr5 | 141978302 | 141987975 |
| chr5 | 14219408  | 14270899  |
| chr5 | 14219408  | 14316743  |
| chr5 | 14222781  | 14280436  |
| chr5 | 14242763  | 14280436  |
| chr5 | 14242763  | 14287063  |
| chr5 | 14278309  | 14304592  |
| chr5 | 142885297 | 142932739 |
| chr5 | 14293011  | 14343806  |
| chr5 | 14311294  | 14336727  |
| chr5 | 143120987 | 143173155 |
| chr5 | 143147230 | 143173155 |
| chr5 | 143352724 | 143400852 |
| chr5 | 145665253 | 145765000 |
| chr5 | 145703974 | 145796547 |
| chr5 | 145703974 | 145823134 |
| chr5 | 145760248 | 145765000 |
| chr5 | 145764930 | 145776430 |
| chr5 | 145817893 | 145831047 |
| chr5 | 146098155 | 146105113 |
| chr5 | 146160373 | 146161564 |
| chr5 | 146168127 | 146175370 |
| chr5 | 146223402 | 146243879 |
| chr5 | 14673641  | 14681624  |
| chr5 | 14673641  | 14693094  |
| chr5 | 14678680  | 14681624  |
| chr5 | 14678680  | 14693396  |
| chr5 | 14687520  | 14693094  |
| chr5 | 148394713 | 148411238 |
| chr5 | 148541001 | 148550262 |
| chr5 | 148548667 | 148677235 |
| chr5 | 148636988 | 148677235 |
| chr5 | 149501014 | 149520388 |
| chr5 | 149525044 | 149529719 |
| chr5 | 149525044 | 149543898 |
| chr5 | 149817612 | 149820606 |
| chr5 | 150387942 | 150390023 |

|      |           |           |
|------|-----------|-----------|
| chr5 | 150532944 | 150551894 |
| chr5 | 151452342 | 151479489 |
| chr5 | 151458787 | 151472722 |
| chr5 | 151786571 | 151792201 |
| chr5 | 151786571 | 151803996 |
| chr5 | 151786571 | 151804446 |
| chr5 | 151786571 | 151812977 |
| chr5 | 151786602 | 151803996 |
| chr5 | 154026398 | 154034946 |
| chr5 | 154029488 | 154034946 |
| chr5 | 154030531 | 154034967 |
| chr5 | 154033790 | 154034946 |
| chr5 | 154755643 | 154811640 |
| chr5 | 154865441 | 154867792 |
| chr5 | 154950820 | 154967237 |
| chr5 | 15599061  | 15616072  |
| chr5 | 15615982  | 15634464  |
| chr5 | 157751389 | 157755192 |
| chr5 | 157754003 | 157755192 |
| chr5 | 160010499 | 160023692 |
| chr5 | 160028505 | 160043169 |
| chr5 | 160064931 | 160065766 |
| chr5 | 160074988 | 160080770 |
| chr5 | 160089505 | 160094065 |
| chr5 | 160252882 | 160255708 |
| chr5 | 160252882 | 160259771 |
| chr5 | 160280524 | 160305126 |
| chr5 | 163456928 | 163457633 |
| chr5 | 16676030  | 16677113  |
| chr5 | 168395181 | 168397800 |
| chr5 | 168412004 | 168422097 |
| chr5 | 168488601 | 168498046 |
| chr5 | 168557422 | 168568998 |
| chr5 | 170878139 | 170892553 |
| chr5 | 170892386 | 171028989 |
| chr5 | 170916464 | 171028989 |
| chr5 | 170918712 | 170983245 |
| chr5 | 170919440 | 171028989 |
| chr5 | 170924356 | 170933053 |
| chr5 | 171132233 | 171242820 |
| chr5 | 171158333 | 171242820 |
| chr5 | 171171232 | 171205612 |
| chr5 | 171196728 | 171213738 |
| chr5 | 171213618 | 171242820 |
| chr5 | 171213618 | 171265847 |



|      |           |           |
|------|-----------|-----------|
| chr5 | 171845505 | 171872990 |
| chr5 | 171910571 | 171997051 |
| chr5 | 171914342 | 172003310 |
| chr5 | 172211966 | 172234358 |
| chr5 | 172230897 | 172234358 |
| chr5 | 172768748 | 172770306 |
| chr5 | 172770346 | 172770585 |
| chr5 | 172770585 | 172771189 |
| chr5 | 172914713 | 172915690 |
| chr5 | 173163724 | 173164296 |
| chr5 | 174524061 | 174543516 |
| chr5 | 176347520 | 176348356 |
| chr5 | 176919169 | 176943488 |
| chr5 | 176943334 | 176954740 |
| chr5 | 176951473 | 176963843 |
| chr5 | 177079381 | 177086266 |
| chr5 | 177169393 | 177204292 |
| chr5 | 177536357 | 177539042 |
| chr5 | 177536357 | 177539194 |
| chr5 | 177619077 | 177627614 |
| chr5 | 178204836 | 178205046 |
| chr5 | 178208735 | 178231523 |
| chr5 | 178860127 | 178860974 |
| chr5 | 179569301 | 179575648 |
| chr5 | 179615545 | 179617911 |
| chr5 | 179617020 | 179618323 |
| chr5 | 179617988 | 179618259 |
| chr5 | 179704154 | 179709059 |
| chr5 | 179704154 | 179710065 |
| chr5 | 179704154 | 179720560 |
| chr5 | 179708380 | 179708946 |
| chr5 | 179766741 | 179768826 |
| chr5 | 179811573 | 179816065 |
| chr5 | 179841906 | 179844252 |
| chr5 | 179841906 | 179851424 |
| chr5 | 179847977 | 179851424 |
| chr5 | 179852019 | 179853437 |
| chr5 | 179853196 | 179853437 |
| chr5 | 179879218 | 179879627 |
| chr5 | 179970199 | 179970506 |
| chr5 | 180013269 | 180040647 |
| chr5 | 180040452 | 180047062 |
| chr5 | 180261683 | 180287067 |
| chr5 | 180495651 | 180564593 |
| chr5 | 180541159 | 180553471 |

|      |           |           |
|------|-----------|-----------|
| chr5 | 180573987 | 180576676 |
| chr5 | 180573987 | 180576684 |
| chr5 | 180849153 | 180852060 |
| chr5 | 180850581 | 180851493 |
| chr5 | 1814338   | 1816054   |
| chr5 | 21491320  | 21501826  |
| chr5 | 225908    | 240476    |
| chr5 | 254392    | 256455    |
| chr5 | 272710    | 314596    |
| chr5 | 27407042  | 27477801  |
| chr5 | 27472382  | 27475695  |
| chr5 | 27475534  | 27489386  |
| chr5 | 311292    | 314596    |
| chr5 | 31421271  | 31424530  |
| chr5 | 31483429  | 31495372  |
| chr5 | 31538480  | 31541402  |
| chr5 | 32121494  | 32126636  |
| chr5 | 32121494  | 32143880  |
| chr5 | 32134563  | 32143880  |
| chr5 | 32139551  | 32143880  |
| chr5 | 32143748  | 32170768  |
| chr5 | 32143748  | 32171945  |
| chr5 | 33440975  | 33448731  |
| chr5 | 33812464  | 33881480  |
| chr5 | 33881118  | 33891841  |
| chr5 | 34020586  | 34052110  |
| chr5 | 34023908  | 34031804  |
| chr5 | 34733115  | 34757598  |
| chr5 | 34762196  | 34796027  |
| chr5 | 34762196  | 34814669  |
| chr5 | 34770627  | 34796027  |
| chr5 | 34792905  | 34796027  |
| chr5 | 34915686  | 34924975  |
| chr5 | 35641584  | 35654726  |
| chr5 | 37095431  | 37125409  |
| chr5 | 37243007  | 37247745  |
| chr5 | 37291812  | 37299568  |
| chr5 | 37579029  | 37605238  |
| chr5 | 38481298  | 38530666  |
| chr5 | 38527123  | 38530666  |
| chr5 | 39002534  | 39026340  |
| chr5 | 39002534  | 39030572  |
| chr5 | 40728344  | 40771863  |
| chr5 | 40728344  | 40775503  |
| chr5 | 40746797  | 40771863  |

|      |          |          |
|------|----------|----------|
| chr5 | 40746797 | 40775503 |
| chr5 | 40746797 | 40777586 |
| chr5 | 40764513 | 40780338 |
| chr5 | 40827699 | 40832573 |
| chr5 | 40827699 | 40834606 |
| chr5 | 41740464 | 41803163 |
| chr5 | 41784569 | 41807438 |
| chr5 | 41850029 | 41862724 |
| chr5 | 41929824 | 41934308 |
| chr5 | 42687514 | 42700002 |
| chr5 | 43122043 | 43139309 |
| chr5 | 43157108 | 43161931 |
| chr5 | 43453657 | 43456789 |
| chr5 | 43675510 | 43704342 |
| chr5 | 43675510 | 43704400 |
| chr5 | 43700118 | 43704400 |
| chr5 | 50274987 | 50411383 |
| chr5 | 50382570 | 50411383 |
| chr5 | 50399106 | 50403454 |
| chr5 | 50399106 | 50405852 |
| chr5 | 50399106 | 50411383 |
| chr5 | 50399106 | 50428227 |
| chr5 | 50399231 | 50411383 |
| chr5 | 53603451 | 53604895 |
| chr5 | 54137646 | 54171928 |
| chr5 | 5447840  | 5457773  |
| chr5 | 55322326 | 55324753 |
| chr5 | 55691071 | 55691292 |
| chr5 | 55697845 | 55704434 |
| chr5 | 55910531 | 55954984 |
| chr5 | 57200199 | 57231321 |
| chr5 | 57241433 | 57247215 |
| chr5 | 60599074 | 60628363 |
| chr5 | 60686961 | 60687838 |
| chr5 | 61360123 | 61473037 |
| chr5 | 614469   | 624579   |
| chr5 | 647804   | 655584   |
| chr5 | 65170616 | 65198360 |
| chr5 | 65242103 | 65276268 |
| chr5 | 65260599 | 65334458 |
| chr5 | 65291328 | 65334458 |
| chr5 | 65329377 | 65334458 |
| chr5 | 65409518 | 65473952 |
| chr5 | 65451474 | 65452221 |
| chr5 | 65451474 | 65473655 |

|      |          |          |
|------|----------|----------|
| chr5 | 65451474 | 65473715 |
| chr5 | 65521474 | 65554898 |
| chr5 | 65542553 | 65542848 |
| chr5 | 65542801 | 65554933 |
| chr5 | 65624193 | 65624500 |
| chr5 | 65926581 | 65994864 |
| chr5 | 65926581 | 66038482 |
| chr5 | 65926656 | 65994864 |
| chr5 | 65931179 | 65994864 |
| chr5 | 65975986 | 65994864 |
| chr5 | 65988634 | 65995353 |
| chr5 | 6651841  | 6665639  |
| chr5 | 6653446  | 6662966  |
| chr5 | 66788669 | 66822898 |
| chr5 | 6739731  | 6756188  |
| chr5 | 69113227 | 69114403 |
| chr5 | 69282889 | 69311204 |
| chr5 | 69419370 | 69441643 |
| chr5 | 69495278 | 69509819 |
| chr5 | 69504176 | 69520101 |
| chr5 | 69513947 | 69553773 |
| chr5 | 70946065 | 70953279 |
| chr5 | 71580957 | 71604468 |
| chr5 | 72283504 | 72297702 |
| chr5 | 72283504 | 72314158 |
| chr5 | 72290949 | 72297702 |
| chr5 | 72358202 | 72359697 |
| chr5 | 72861791 | 72865729 |
| chr5 | 73747065 | 73749984 |
| chr5 | 73921729 | 73923164 |
| chr5 | 74721602 | 74736985 |
| chr5 | 748403   | 837480   |
| chr5 | 75534827 | 75552591 |
| chr5 | 77098654 | 77118521 |
| chr5 | 77116855 | 77118521 |
| chr5 | 77463094 | 77467470 |
| chr5 | 77691430 | 77708347 |
| chr5 | 78134922 | 78165672 |
| chr5 | 78388836 | 78475654 |
| chr5 | 78415519 | 78429468 |
| chr5 | 78475503 | 78483051 |
| chr5 | 78592144 | 78632368 |
| chr5 | 79439009 | 79513094 |
| chr5 | 79619611 | 79623355 |
| chr5 | 79632420 | 79669028 |

|      |           |           |
|------|-----------|-----------|
| chr5 | 79980263  | 79990663  |
| chr5 | 79983592  | 79990236  |
| chr5 | 80202885  | 80205360  |
| chr5 | 80501204  | 80522138  |
| chr5 | 80622407  | 80638009  |
| chr5 | 80672243  | 80673126  |
| chr5 | 80675002  | 80728965  |
| chr5 | 80787564  | 80843546  |
| chr5 | 80848447  | 80854316  |
| chr5 | 80873115  | 80875955  |
| chr5 | 81615472  | 81657076  |
| chr5 | 81973947  | 81987678  |
| chr5 | 81973947  | 82058602  |
| chr5 | 81981308  | 82178587  |
| chr5 | 81987558  | 82129769  |
| chr5 | 82035308  | 82058602  |
| chr5 | 82252561  | 82254325  |
| chr5 | 82252561  | 82254389  |
| chr5 | 82252561  | 82261055  |
| chr5 | 83104909  | 83124886  |
| chr5 | 87268829  | 87333337  |
| chr5 | 87331347  | 87338088  |
| chr5 | 87362550  | 87390929  |
| chr5 | 87389392  | 87390929  |
| chr5 | 88202971  | 88207180  |
| chr5 | 88217749  | 88228528  |
| chr5 | 88220562  | 88245792  |
| chr5 | 88220589  | 88228528  |
| chr5 | 88220589  | 88240916  |
| chr5 | 88282041  | 88292883  |
| chr5 | 883473    | 883937    |
| chr5 | 883937    | 886704    |
| chr5 | 93819612  | 93881688  |
| chr5 | 93958776  | 93994504  |
| chr5 | 93958776  | 94057203  |
| chr5 | 94050730  | 94060348  |
| chr5 | 94050730  | 94111301  |
| chr5 | 95580891  | 95586733  |
| chr5 | 95888908  | 95919545  |
| chr5 | 95906522  | 95932713  |
| chr5 | 95913770  | 95923217  |
| chr5 | 95913770  | 95932713  |
| chr5 | 96318472  | 96319355  |
| chr5 | 97668550  | 97713497  |
| chr6 | 100589633 | 100770473 |

|      |           |           |
|------|-----------|-----------|
| chr6 | 100679617 | 100767236 |
| chr6 | 100798712 | 100806070 |
| chr6 | 100798712 | 100848333 |
| chr6 | 100848147 | 100849096 |
| chr6 | 101382723 | 101399392 |
| chr6 | 104765363 | 104772074 |
| chr6 | 10528630  | 10528841  |
| chr6 | 105373368 | 105376232 |
| chr6 | 106201971 | 106217601 |
| chr6 | 107039748 | 107040524 |
| chr6 | 107044345 | 107099296 |
| chr6 | 107087611 | 107099296 |
| chr6 | 107098550 | 107104512 |
| chr6 | 107212108 | 107225064 |
| chr6 | 10728639  | 10730849  |
| chr6 | 107324555 | 107334332 |
| chr6 | 107503656 | 107518388 |
| chr6 | 107904628 | 108042748 |
| chr6 | 107921796 | 107956106 |
| chr6 | 107929414 | 107931314 |
| chr6 | 108210677 | 108214622 |
| chr6 | 108319616 | 108324048 |
| chr6 | 108323093 | 108402054 |
| chr6 | 108443136 | 108447296 |
| chr6 | 108851643 | 108854485 |
| chr6 | 10898014  | 10902963  |
| chr6 | 109140420 | 109146937 |
| chr6 | 109737092 | 109738453 |
| chr6 | 110100525 | 110108681 |
| chr6 | 110667433 | 110686021 |
| chr6 | 110736032 | 110773937 |
| chr6 | 110746125 | 110779547 |
| chr6 | 110879986 | 110887591 |
| chr6 | 110879986 | 110888983 |
| chr6 | 110879986 | 110890356 |
| chr6 | 110886876 | 110890356 |
| chr6 | 110887504 | 110893662 |
| chr6 | 111005987 | 111015856 |
| chr6 | 111025402 | 111026547 |
| chr6 | 111472012 | 111474476 |
| chr6 | 111472012 | 111474479 |
| chr6 | 111570084 | 111576470 |
| chr6 | 113940894 | 113960018 |
| chr6 | 11565665  | 11567535  |
| chr6 | 116652003 | 116660778 |

|      |           |           |
|------|-----------|-----------|
| chr6 | 11717308  | 11723500  |
| chr6 | 11766273  | 11770089  |
| chr6 | 119188404 | 119196657 |
| chr6 | 12015525  | 12020418  |
| chr6 | 125045210 | 125046661 |
| chr6 | 125045210 | 125082923 |
| chr6 | 126008391 | 126174911 |
| chr6 | 127280230 | 127287007 |
| chr6 | 127314815 | 127330948 |
| chr6 | 128184431 | 128266607 |
| chr6 | 128240034 | 128293355 |
| chr6 | 128240034 | 128304828 |
| chr6 | 128304667 | 128322310 |
| chr6 | 130287819 | 130313093 |
| chr6 | 130288226 | 130313093 |
| chr6 | 130311290 | 130313093 |
| chr6 | 130312977 | 130334845 |
| chr6 | 130312977 | 130341122 |
| chr6 | 130385172 | 130387592 |
| chr6 | 131607927 | 131628108 |
| chr6 | 131949601 | 131949948 |
| chr6 | 132503445 | 132508345 |
| chr6 | 134982372 | 135002842 |
| chr6 | 134993757 | 135010759 |
| chr6 | 135037810 | 135042126 |
| chr6 | 135039572 | 135040657 |
| chr6 | 135039572 | 135042118 |
| chr6 | 135290422 | 135346796 |
| chr6 | 135318518 | 135346796 |
| chr6 | 136694139 | 136698751 |
| chr6 | 136720449 | 136784719 |
| chr6 | 138404360 | 138404597 |
| chr6 | 138441982 | 138572061 |
| chr6 | 138473305 | 138481490 |
| chr6 | 138496218 | 138505638 |
| chr6 | 138496218 | 138571813 |
| chr6 | 138496218 | 138572061 |
| chr6 | 138496218 | 138574844 |
| chr6 | 138496218 | 138685683 |
| chr6 | 138571709 | 138572061 |
| chr6 | 138785226 | 138788439 |
| chr6 | 138941334 | 138951185 |
| chr6 | 14131519  | 14135909  |
| chr6 | 142820032 | 142837047 |
| chr6 | 142836934 | 142870339 |

|      |           |           |
|------|-----------|-----------|
| chr6 | 142836934 | 142918628 |
| chr6 | 142836934 | 142923868 |
| chr6 | 142836934 | 142926022 |
| chr6 | 143485151 | 143505457 |
| chr6 | 143687678 | 143712183 |
| chr6 | 143687678 | 143749065 |
| chr6 | 143707981 | 143712183 |
| chr6 | 144291736 | 144308570 |
| chr6 | 144291736 | 144357729 |
| chr6 | 144437564 | 144437862 |
| chr6 | 144490038 | 144493456 |
| chr6 | 145671238 | 145686296 |
| chr6 | 145864387 | 145894977 |
| chr6 | 145881627 | 145894977 |
| chr6 | 149005302 | 149021481 |
| chr6 | 149369908 | 149380143 |
| chr6 | 149378017 | 149380143 |
| chr6 | 149379410 | 149399184 |
| chr6 | 149676254 | 149695221 |
| chr6 | 149676259 | 149678745 |
| chr6 | 149727069 | 149738778 |
| chr6 | 149770276 | 149802416 |
| chr6 | 149772047 | 149802369 |
| chr6 | 151009818 | 151057364 |
| chr6 | 151034492 | 151057364 |
| chr6 | 15246380  | 15374252  |
| chr6 | 15246380  | 15410365  |
| chr6 | 154406260 | 154433507 |
| chr6 | 154406392 | 154442290 |
| chr6 | 154810014 | 154833409 |
| chr6 | 154818478 | 154860998 |
| chr6 | 154830921 | 154833409 |
| chr6 | 155257771 | 155311339 |
| chr6 | 156799659 | 156829421 |
| chr6 | 156799664 | 156901525 |
| chr6 | 156815684 | 156829421 |
| chr6 | 156826376 | 156829421 |
| chr6 | 156826684 | 156829421 |
| chr6 | 156829226 | 156829705 |
| chr6 | 156829226 | 156834824 |
| chr6 | 156829226 | 156835950 |
| chr6 | 156955585 | 157110561 |
| chr6 | 157026295 | 157084905 |
| chr6 | 157036834 | 157084905 |
| chr6 | 157036834 | 157110561 |



|      |           |           |
|------|-----------|-----------|
| chr6 | 157079793 | 157084905 |
| chr6 | 157148623 | 157150853 |
| chr6 | 157592987 | 157594446 |
| chr6 | 157592987 | 157595723 |
| chr6 | 157592987 | 157595824 |
| chr6 | 157628348 | 157633148 |
| chr6 | 157862133 | 157875176 |
| chr6 | 158143055 | 158162152 |
| chr6 | 158429735 | 158431663 |
| chr6 | 158442710 | 158461729 |
| chr6 | 158457127 | 158461729 |
| chr6 | 158573419 | 158610003 |
| chr6 | 159784665 | 159786939 |
| chr6 | 161022009 | 161034449 |
| chr6 | 161022009 | 161049979 |
| chr6 | 161165576 | 161166417 |
| chr6 | 1624005   | 1624540   |
| chr6 | 163429806 | 163455421 |
| chr6 | 163455278 | 163462300 |
| chr6 | 163478779 | 163490557 |
| chr6 | 16480026  | 16657901  |
| chr6 | 16585779  | 16753402  |
| chr6 | 16657775  | 16754746  |
| chr6 | 167022408 | 167040339 |
| chr6 | 169570072 | 169602321 |
| chr6 | 169582452 | 169664286 |
| chr6 | 169602218 | 169689308 |
| chr6 | 169634427 | 169660753 |
| chr6 | 169664165 | 169689308 |
| chr6 | 169667135 | 169689308 |
| chr6 | 169672254 | 169689308 |
| chr6 | 170375630 | 170395579 |
| chr6 | 170488396 | 170549113 |
| chr6 | 17462995  | 17508900  |
| chr6 | 17465546  | 17513954  |
| chr6 | 17465575  | 17513954  |
| chr6 | 17507168  | 17519326  |
| chr6 | 17624560  | 17637289  |
| chr6 | 17869045  | 17873437  |
| chr6 | 18185771  | 18188002  |
| chr6 | 18185771  | 18191381  |
| chr6 | 18197056  | 18201657  |
| chr6 | 18200438  | 18201657  |
| chr6 | 1917939   | 1930230   |
| chr6 | 1930102   | 1952129   |

|      |          |          |
|------|----------|----------|
| chr6 | 20091553 | 20102412 |
| chr6 | 20479845 | 20482949 |
| chr6 | 20781144 | 20805719 |
| chr6 | 20781144 | 20874430 |
| chr6 | 2115770  | 2127833  |
| chr6 | 2263600  | 2272777  |
| chr6 | 2263600  | 2273417  |
| chr6 | 2382853  | 2399037  |
| chr6 | 2397220  | 2399037  |
| chr6 | 24408407 | 24423728 |
| chr6 | 24416109 | 24418578 |
| chr6 | 24705363 | 24716324 |
| chr6 | 26158134 | 26158559 |
| chr6 | 26462796 | 26463525 |
| chr6 | 28162608 | 28164901 |
| chr6 | 2833873  | 2840594  |
| chr6 | 2895390  | 2898048  |
| chr6 | 29888466 | 29943026 |
| chr6 | 29889327 | 29943543 |
| chr6 | 29890263 | 29944616 |
| chr6 | 30021666 | 30035983 |
| chr6 | 30032988 | 30035983 |
| chr6 | 30289361 | 30296237 |
| chr6 | 303729   | 311962   |
| chr6 | 30546695 | 30548902 |
| chr6 | 30558149 | 30561508 |
| chr6 | 30608778 | 30614427 |
| chr6 | 3076763  | 3077935  |
| chr6 | 3076763  | 3081116  |
| chr6 | 3076763  | 3083313  |
| chr6 | 3076763  | 3085408  |
| chr6 | 3076763  | 3089657  |
| chr6 | 31271598 | 31356442 |
| chr6 | 31412324 | 31507137 |
| chr6 | 31534783 | 31535366 |
| chr6 | 3157406  | 3226669  |
| chr6 | 31784737 | 31785245 |
| chr6 | 31795272 | 31795545 |
| chr6 | 31810098 | 31811985 |
| chr6 | 31837235 | 31839618 |
| chr6 | 31966013 | 31966690 |
| chr6 | 32978388 | 32979806 |
| chr6 | 33670815 | 33671140 |
| chr6 | 33774804 | 33786774 |
| chr6 | 3410187  | 3438555  |

|      |          |          |
|------|----------|----------|
| chr6 | 34288739 | 34341972 |
| chr6 | 34341861 | 34343032 |
| chr6 | 34341861 | 34370492 |
| chr6 | 34421829 | 34424668 |
| chr6 | 34646600 | 34649830 |
| chr6 | 34646600 | 34679402 |
| chr6 | 34654624 | 34688933 |
| chr6 | 34967238 | 34972643 |
| chr6 | 35383576 | 35411217 |
| chr6 | 35410213 | 35420281 |
| chr6 | 35468439 | 35468768 |
| chr6 | 35468439 | 35468777 |
| chr6 | 35597247 | 35646850 |
| chr6 | 35619095 | 35646850 |
| chr6 | 35619095 | 35670563 |
| chr6 | 35619095 | 35672756 |
| chr6 | 35619095 | 35672759 |
| chr6 | 35619095 | 35680422 |
| chr6 | 35637013 | 35646366 |
| chr6 | 35637013 | 35672759 |
| chr6 | 35637013 | 35680422 |
| chr6 | 35642719 | 35672759 |
| chr6 | 35869943 | 35870280 |
| chr6 | 35886723 | 35891000 |
| chr6 | 36072872 | 36078791 |
| chr6 | 36072872 | 36080086 |
| chr6 | 36083030 | 36096066 |
| chr6 | 36095794 | 36107628 |
| chr6 | 36130618 | 36132679 |
| chr6 | 36210384 | 36222265 |
| chr6 | 36213859 | 36218010 |
| chr6 | 36465600 | 36470257 |
| chr6 | 36465600 | 36475062 |
| chr6 | 36601707 | 36605189 |
| chr6 | 3727550  | 3739161  |
| chr6 | 37312879 | 37317206 |
| chr6 | 37359182 | 37369218 |
| chr6 | 37368483 | 37391454 |
| chr6 | 3737078  | 3739161  |
| chr6 | 3737078  | 3742297  |
| chr6 | 38061592 | 38062525 |
| chr6 | 38077133 | 38082457 |
| chr6 | 38078039 | 38082457 |
| chr6 | 38116571 | 38116843 |
| chr6 | 38277564 | 38288461 |

|      |          |          |
|------|----------|----------|
| chr6 | 38277564 | 38345093 |
| chr6 | 38577599 | 38600008 |
| chr6 | 41103942 | 41124820 |
| chr6 | 41124484 | 41140955 |
| chr6 | 41590347 | 41591189 |
| chr6 | 41787708 | 41789336 |
| chr6 | 41796112 | 41916939 |
| chr6 | 41803805 | 41856729 |
| chr6 | 41803805 | 41916939 |
| chr6 | 41856625 | 41871637 |
| chr6 | 41870252 | 41871637 |
| chr6 | 41871297 | 41871637 |
| chr6 | 41871563 | 41874239 |
| chr6 | 41871563 | 41907287 |
| chr6 | 41871563 | 41916939 |
| chr6 | 41891793 | 41907287 |
| chr6 | 41891793 | 41909522 |
| chr6 | 41930768 | 41931362 |
| chr6 | 42564199 | 42594304 |
| chr6 | 42580293 | 42606651 |
| chr6 | 42592152 | 42594304 |
| chr6 | 42617408 | 42632387 |
| chr6 | 42663277 | 42666245 |
| chr6 | 42663277 | 42679832 |
| chr6 | 42781838 | 42823003 |
| chr6 | 42781838 | 42830172 |
| chr6 | 42810305 | 42830172 |
| chr6 | 42880860 | 42886470 |
| chr6 | 42883450 | 42886470 |
| chr6 | 42885973 | 42886470 |
| chr6 | 42964293 | 42975038 |
| chr6 | 42972882 | 42975038 |
| chr6 | 43026036 | 43029190 |
| chr6 | 43178882 | 43179066 |
| chr6 | 43225646 | 43226395 |
| chr6 | 43527633 | 43528886 |
| chr6 | 43527633 | 43528928 |
| chr6 | 43587271 | 43587652 |
| chr6 | 43599427 | 43601091 |
| chr6 | 43636380 | 43640630 |
| chr6 | 43671839 | 43675617 |
| chr6 | 44099734 | 44116629 |
| chr6 | 44113872 | 44116629 |
| chr6 | 44113886 | 44116629 |
| chr6 | 44114076 | 44116629 |

|      |          |          |
|------|----------|----------|
| chr6 | 44300739 | 44301155 |
| chr6 | 44829763 | 45106006 |
| chr6 | 44950042 | 45020632 |
| chr6 | 45422592 | 45513653 |
| chr6 | 45422592 | 45546970 |
| chr6 | 45491940 | 45494076 |
| chr6 | 45491940 | 45513379 |
| chr6 | 47503279 | 47504054 |
| chr6 | 47503279 | 47504758 |
| chr6 | 47503279 | 47515962 |
| chr6 | 47526627 | 47554766 |
| chr6 | 47533601 | 47559401 |
| chr6 | 4854524  | 4892379  |
| chr6 | 4867355  | 4892379  |
| chr6 | 4881364  | 4892379  |
| chr6 | 4888736  | 4892379  |
| chr6 | 4890254  | 4892379  |
| chr6 | 4891712  | 4894040  |
| chr6 | 4891712  | 4896462  |
| chr6 | 4935580  | 4937737  |
| chr6 | 49457185 | 49458058 |
| chr6 | 5216617  | 5243416  |
| chr6 | 52267864 | 52281508 |
| chr6 | 52267864 | 52281674 |
| chr6 | 52422888 | 52452837 |
| chr6 | 52422917 | 52469473 |
| chr6 | 52422917 | 52490350 |
| chr6 | 52437561 | 52438591 |
| chr6 | 52438303 | 52440603 |
| chr6 | 52516005 | 52517276 |
| chr6 | 52578311 | 52579609 |
| chr6 | 52665273 | 52666518 |
| chr6 | 53009438 | 53010240 |
| chr6 | 53145557 | 53158370 |
| chr6 | 5325135  | 5431172  |
| chr6 | 53253048 | 53276256 |
| chr6 | 53269086 | 53276256 |
| chr6 | 53269086 | 53291963 |
| chr6 | 53269086 | 53295707 |
| chr6 | 53291775 | 53297555 |
| chr6 | 53498606 | 53522527 |
| chr6 | 53833066 | 53842227 |
| chr6 | 5404541  | 5433056  |
| chr6 | 5404541  | 5445504  |
| chr6 | 54308596 | 54326916 |

|      |          |          |
|------|----------|----------|
| chr6 | 5431040  | 5433056  |
| chr6 | 5431040  | 5445504  |
| chr6 | 56843054 | 56900621 |
| chr6 | 56900420 | 56954650 |
| chr6 | 57014374 | 57015353 |
| chr6 | 57014461 | 57015353 |
| chr6 | 57050773 | 57051048 |
| chr6 | 57050773 | 57055797 |
| chr6 | 57052685 | 57055797 |
| chr6 | 57052685 | 57059377 |
| chr6 | 57052685 | 57059409 |
| chr6 | 57124733 | 57136475 |
| chr6 | 57181190 | 57190600 |
| chr6 | 57181190 | 57210445 |
| chr6 | 57182031 | 57183911 |
| chr6 | 57182031 | 57184225 |
| chr6 | 57182031 | 57190666 |
| chr6 | 57190392 | 57207713 |
| chr6 | 57190392 | 57210445 |
| chr6 | 57371169 | 57382168 |
| chr6 | 57379900 | 57402268 |
| chr6 | 57398004 | 57537625 |
| chr6 | 57481876 | 57537625 |
| chr6 | 57525745 | 57537625 |
| chr6 | 57526954 | 57537625 |
| chr6 | 5771290  | 5775316  |
| chr6 | 57919783 | 57924591 |
| chr6 | 57919783 | 57926510 |
| chr6 | 57919783 | 57930291 |
| chr6 | 629834   | 647666   |
| chr6 | 70426569 | 70452571 |
| chr6 | 70699274 | 70732511 |
| chr6 | 70727128 | 70773425 |
| chr6 | 70747976 | 70755065 |
| chr6 | 7140647  | 7189322  |
| chr6 | 71416409 | 71418754 |
| chr6 | 7174637  | 7176773  |
| chr6 | 7174637  | 7189322  |
| chr6 | 7176307  | 7176773  |
| chr6 | 72640733 | 72648904 |
| chr6 | 72647931 | 72677214 |
| chr6 | 73425463 | 73445747 |
| chr6 | 73482448 | 73486761 |
| chr6 | 75240300 | 75244006 |
| chr6 | 75621515 | 75634811 |

|      |          |          |
|------|----------|----------|
| chr6 | 75622750 | 75647801 |
| chr6 | 75702622 | 75703072 |
| chr6 | 78897828 | 78903110 |
| chr6 | 79015254 | 79015629 |
| chr6 | 79654494 | 79673799 |
| chr6 | 80123418 | 80171390 |
| chr6 | 80342857 | 80343812 |
| chr6 | 80343663 | 80353897 |
| chr6 | 80343663 | 80354354 |
| chr6 | 82181878 | 82194595 |
| chr6 | 82214230 | 82214829 |
| chr6 | 82224067 | 82231833 |
| chr6 | 83018972 | 83044506 |
| chr6 | 83018972 | 83044655 |
| chr6 | 83090217 | 83097115 |
| chr6 | 83707797 | 83709761 |
| chr6 | 84444386 | 84541724 |
| chr6 | 84444386 | 84556154 |
| chr6 | 85547115 | 85574378 |
| chr6 | 85565331 | 85588950 |
| chr6 | 85617390 | 85619417 |
| chr6 | 85622481 | 85642869 |
| chr6 | 87203477 | 87218731 |
| chr6 | 87210450 | 87218731 |
| chr6 | 87210450 | 87245644 |
| chr6 | 87214997 | 87218731 |
| chr6 | 87215902 | 87222894 |
| chr6 | 87337008 | 87341328 |
| chr6 | 87337008 | 87348906 |
| chr6 | 87337008 | 87356503 |
| chr6 | 87345166 | 87398377 |
| chr6 | 87356300 | 87383760 |
| chr6 | 87477361 | 87491739 |
| chr6 | 87598926 | 87601881 |
| chr6 | 87657938 | 87665833 |
| chr6 | 87663002 | 87667173 |
| chr6 | 87675079 | 87681763 |
| chr6 | 88803697 | 88853764 |
| chr6 | 88887788 | 88904955 |
| chr6 | 88904714 | 88941176 |
| chr6 | 88928984 | 88941176 |
| chr6 | 89595915 | 89606142 |
| chr6 | 89627582 | 89628341 |
| chr6 | 89661633 | 89662086 |
| chr6 | 89718365 | 89719067 |

|      |           |           |
|------|-----------|-----------|
| chr7 | 100029860 | 100031100 |
| chr7 | 1000469   | 1010305   |
| chr7 | 100056910 | 100058298 |
| chr7 | 100089640 | 100090487 |
| chr7 | 100098749 | 100099022 |
| chr7 | 100355142 | 100355804 |
| chr7 | 100367348 | 100367617 |
| chr7 | 100706820 | 100707333 |
| chr7 | 1009949   | 1010300   |
| chr7 | 101127107 | 101128664 |
| chr7 | 101127244 | 101128368 |
| chr7 | 101134388 | 101135594 |
| chr7 | 101223476 | 101224141 |
| chr7 | 101893192 | 101916225 |
| chr7 | 101916114 | 101916507 |
| chr7 | 101916114 | 101918760 |
| chr7 | 101916114 | 101951784 |
| chr7 | 102173499 | 102178657 |
| chr7 | 102455249 | 102457981 |
| chr7 | 102457281 | 102457981 |
| chr7 | 102703314 | 102854860 |
| chr7 | 102813276 | 102822203 |
| chr7 | 102813276 | 102832974 |
| chr7 | 102813276 | 102854860 |
| chr7 | 102854776 | 102901180 |
| chr7 | 102874240 | 102884312 |
| chr7 | 103025062 | 103047020 |
| chr7 | 105200912 | 105203785 |
| chr7 | 105203627 | 105206529 |
| chr7 | 105203627 | 105335953 |
| chr7 | 105284714 | 105297533 |
| chr7 | 105285008 | 105297533 |
| chr7 | 105285693 | 105297533 |
| chr7 | 105285790 | 105297533 |
| chr7 | 105293533 | 105297533 |
| chr7 | 105293570 | 105297533 |
| chr7 | 105297420 | 105318945 |
| chr7 | 105457761 | 105468463 |
| chr7 | 105470760 | 105495253 |
| chr7 | 105508114 | 105508520 |
| chr7 | 105508155 | 105508544 |
| chr7 | 106251069 | 106254504 |
| chr7 | 107274479 | 107283732 |
| chr7 | 107298141 | 107314169 |
| chr7 | 107362032 | 107459788 |



|      |           |           |
|------|-----------|-----------|
| chr7 | 107753511 | 107753890 |
| chr7 | 107916793 | 107926761 |
| chr7 | 10986634  | 11037091  |
| chr7 | 10986681  | 11062085  |
| chr7 | 111487237 | 111492514 |
| chr7 | 111487237 | 111532585 |
| chr7 | 116695749 | 116700284 |
| chr7 | 116758458 | 116796042 |
| chr7 | 116954460 | 117099844 |
| chr7 | 118185646 | 118188405 |
| chr7 | 12212991  | 12215027  |
| chr7 | 122530131 | 122581290 |
| chr7 | 123596351 | 123635772 |
| chr7 | 123684485 | 123709223 |
| chr7 | 127698874 | 127701394 |
| chr7 | 127717291 | 127807573 |
| chr7 | 127804612 | 127807573 |
| chr7 | 127928059 | 127991056 |
| chr7 | 127976651 | 127991056 |
| chr7 | 127976996 | 127991056 |
| chr7 | 127990946 | 128008144 |
| chr7 | 128310779 | 128315020 |
| chr7 | 128641202 | 128648982 |
| chr7 | 128641237 | 128648982 |
| chr7 | 128715464 | 128716997 |
| chr7 | 128758870 | 128771788 |
| chr7 | 128792269 | 128794768 |
| chr7 | 128881936 | 128882254 |
| chr7 | 129274279 | 129379749 |
| chr7 | 129327982 | 129379749 |
| chr7 | 129368469 | 129379749 |
| chr7 | 129480784 | 129485863 |
| chr7 | 130039463 | 130041473 |
| chr7 | 130040950 | 130041473 |
| chr7 | 130116577 | 130129576 |
| chr7 | 130173631 | 130175638 |
| chr7 | 130912109 | 130936155 |
| chr7 | 130945719 | 131053465 |
| chr7 | 130967388 | 130988888 |
| chr7 | 130984052 | 130988888 |
| chr7 | 130984052 | 131076587 |
| chr7 | 131052424 | 131101187 |
| chr7 | 131338918 | 131445903 |
| chr7 | 131373709 | 131429145 |
| chr7 | 131429034 | 131470944 |

|      |           |           |
|------|-----------|-----------|
| chr7 | 132975168 | 133055157 |
| chr7 | 133305166 | 133480138 |
| chr7 | 133308372 | 133317390 |
| chr7 | 135636330 | 135645018 |
| chr7 | 139146983 | 139148377 |
| chr7 | 139237007 | 139273410 |
| chr7 | 139282055 | 139282986 |
| chr7 | 139365208 | 139374471 |
| chr7 | 139620400 | 139675586 |
| chr7 | 139715931 | 139726108 |
| chr7 | 139715931 | 139742038 |
| chr7 | 139715931 | 139755259 |
| chr7 | 13986115  | 13989139  |
| chr7 | 140053911 | 140058034 |
| chr7 | 140334428 | 140337349 |
| chr7 | 140334633 | 140337349 |
| chr7 | 140355667 | 140357212 |
| chr7 | 140355667 | 140386921 |
| chr7 | 140776911 | 140834703 |
| chr7 | 140781575 | 140834703 |
| chr7 | 140794307 | 140834703 |
| chr7 | 140800361 | 140834703 |
| chr7 | 141674066 | 141682537 |
| chr7 | 143264085 | 143268943 |
| chr7 | 1444651   | 1450400   |
| chr7 | 1459183   | 1489682   |
| chr7 | 148724562 | 148730262 |
| chr7 | 148729961 | 148730283 |
| chr7 | 148729961 | 148737743 |
| chr7 | 148740815 | 148757150 |
| chr7 | 148832633 | 148837000 |
| chr7 | 148832633 | 148838340 |
| chr7 | 148832633 | 148850525 |
| chr7 | 148836821 | 148847305 |
| chr7 | 148842805 | 148847305 |
| chr7 | 148846469 | 148850525 |
| chr7 | 149166157 | 149178855 |
| chr7 | 149166157 | 149179676 |
| chr7 | 149206822 | 149207329 |
| chr7 | 149264382 | 149278527 |
| chr7 | 149292308 | 149293350 |
| chr7 | 149492858 | 149558839 |
| chr7 | 149547724 | 149558839 |
| chr7 | 149547954 | 149549192 |
| chr7 | 149549192 | 149551749 |

|      |           |           |
|------|-----------|-----------|
| chr7 | 149549192 | 149558839 |
| chr7 | 151119986 | 151120745 |
| chr7 | 151218897 | 151219063 |
| chr7 | 151467144 | 151491014 |
| chr7 | 151470570 | 151498180 |
| chr7 | 151477332 | 151518891 |
| chr7 | 151484736 | 151498180 |
| chr7 | 151675419 | 151676412 |
| chr7 | 151675419 | 151767055 |
| chr7 | 151781125 | 151786541 |
| chr7 | 152263015 | 152435787 |
| chr7 | 152286299 | 152315338 |
| chr7 | 152309965 | 152435787 |
| chr7 | 152343878 | 152358675 |
| chr7 | 152358586 | 152435787 |
| chr7 | 152854457 | 152855722 |
| chr7 | 154998649 | 155000155 |
| chr7 | 155672866 | 155685052 |
| chr7 | 155672866 | 155685648 |
| chr7 | 155706859 | 155707128 |
| chr7 | 155763808 | 155766655 |
| chr7 | 155763808 | 155774647 |
| chr7 | 1566591   | 1567850   |
| chr7 | 156779654 | 156826744 |
| chr7 | 156796388 | 156851214 |
| chr7 | 156826604 | 156834575 |
| chr7 | 156826604 | 156863254 |
| chr7 | 156958605 | 156967092 |
| chr7 | 157339720 | 157367483 |
| chr7 | 157339971 | 157367483 |
| chr7 | 157382245 | 157385642 |
| chr7 | 157382245 | 157390394 |
| chr7 | 157382245 | 157416255 |
| chr7 | 157382248 | 157385611 |
| chr7 | 158630496 | 158646563 |
| chr7 | 158631643 | 158646563 |
| chr7 | 158637637 | 158646563 |
| chr7 | 158733877 | 158734471 |
| chr7 | 158788003 | 158798036 |
| chr7 | 158789916 | 158799072 |
| chr7 | 16685923  | 16697061  |
| chr7 | 1688057   | 1709252   |
| chr7 | 17868406  | 17881033  |
| chr7 | 17868406  | 17907340  |
| chr7 | 17888559  | 17897446  |

|      |          |          |
|------|----------|----------|
| chr7 | 17890362 | 17907340 |
| chr7 | 18561838 | 18594029 |
| chr7 | 18585420 | 18594029 |
| chr7 | 18585420 | 18666476 |
| chr7 | 18627901 | 18666476 |
| chr7 | 18722951 | 18793452 |
| chr7 | 18722951 | 18835997 |
| chr7 | 1898199  | 1940191  |
| chr7 | 2002064  | 2004848  |
| chr7 | 2013083  | 2014642  |
| chr7 | 2068666  | 2069338  |
| chr7 | 2069193  | 2200557  |
| chr7 | 208897   | 209384   |
| chr7 | 208897   | 259976   |
| chr7 | 21020867 | 21023309 |
| chr7 | 21020867 | 21033558 |
| chr7 | 21440957 | 21482123 |
| chr7 | 21443590 | 21482123 |
| chr7 | 2200261  | 2218043  |
| chr7 | 2200261  | 2219456  |
| chr7 | 2209946  | 2219456  |
| chr7 | 22160517 | 22189663 |
| chr7 | 22183143 | 22194033 |
| chr7 | 22308338 | 22359392 |
| chr7 | 2239417  | 2239676  |
| chr7 | 22417896 | 22419836 |
| chr7 | 2244562  | 2245277  |
| chr7 | 2244562  | 2250934  |
| chr7 | 22492564 | 22495480 |
| chr7 | 22571774 | 22575762 |
| chr7 | 22940971 | 22991139 |
| chr7 | 22976209 | 22998161 |
| chr7 | 22983943 | 22998161 |
| chr7 | 23116639 | 23144025 |
| chr7 | 23351304 | 23470081 |
| chr7 | 23360585 | 23361741 |
| chr7 | 23415247 | 23418824 |
| chr7 | 23604085 | 23611553 |
| chr7 | 23698191 | 23702221 |
| chr7 | 24593301 | 24650712 |
| chr7 | 24623662 | 24641868 |
| chr7 | 24623662 | 24650712 |
| chr7 | 24623662 | 24668660 |
| chr7 | 24661840 | 24668660 |
| chr7 | 24679130 | 24693848 |

|      |          |          |
|------|----------|----------|
| chr7 | 24687437 | 24693848 |
| chr7 | 24979885 | 24982404 |
| chr7 | 2576585  | 2578526  |
| chr7 | 26177942 | 26186094 |
| chr7 | 26190992 | 26197732 |
| chr7 | 27163574 | 27164967 |
| chr7 | 2729255  | 2731750  |
| chr7 | 2731130  | 2733501  |
| chr7 | 27603137 | 27649633 |
| chr7 | 27629370 | 27632441 |
| chr7 | 29923955 | 29926632 |
| chr7 | 29923955 | 29955360 |
| chr7 | 29923955 | 29969068 |
| chr7 | 30074070 | 30075405 |
| chr7 | 30074070 | 30078778 |
| chr7 | 30146176 | 30159095 |
| chr7 | 30323641 | 30324302 |
| chr7 | 30323641 | 30366295 |
| chr7 | 30355727 | 30366295 |
| chr7 | 30366034 | 30391035 |
| chr7 | 30550635 | 30562128 |
| chr7 | 30595823 | 30603572 |
| chr7 | 30821231 | 30836764 |
| chr7 | 32489248 | 32490766 |
| chr7 | 32716717 | 32726470 |
| chr7 | 32933399 | 32933896 |
| chr7 | 33014699 | 33035988 |
| chr7 | 33146241 | 33183405 |
| chr7 | 33146268 | 33273956 |
| chr7 | 33604864 | 33606553 |
| chr7 | 34966893 | 34989447 |
| chr7 | 36212535 | 36239036 |
| chr7 | 37948839 | 37950392 |
| chr7 | 37948839 | 37966214 |
| chr7 | 38789800 | 38806366 |
| chr7 | 39781769 | 39789544 |
| chr7 | 39987598 | 40003106 |
| chr7 | 39987598 | 40018708 |
| chr7 | 40047820 | 40094396 |
| chr7 | 40180946 | 40217563 |
| chr7 | 42145437 | 42148468 |
| chr7 | 42148225 | 42172686 |
| chr7 | 42917513 | 42917835 |
| chr7 | 43595900 | 43625035 |
| chr7 | 43631474 | 43647634 |

|      |          |          |
|------|----------|----------|
| chr7 | 43633278 | 43647634 |
| chr7 | 43639448 | 43644204 |
| chr7 | 44117265 | 44117618 |
| chr7 | 44392296 | 44413283 |
| chr7 | 44425899 | 44427703 |
| chr7 | 44481291 | 44485284 |
| chr7 | 44569983 | 44570877 |
| chr7 | 44570149 | 44570757 |
| chr7 | 44618823 | 44624565 |
| chr7 | 44645326 | 44654771 |
| chr7 | 4740837  | 4742849  |
| chr7 | 4783798  | 4784175  |
| chr7 | 4983670  | 4996798  |
| chr7 | 4989062  | 4996798  |
| chr7 | 4989062  | 5005228  |
| chr7 | 5020526  | 5057779  |
| chr7 | 5047969  | 5057779  |
| chr7 | 50669721 | 50705323 |
| chr7 | 50669721 | 50710990 |
| chr7 | 50703820 | 50705323 |
| chr7 | 50703820 | 50710990 |
| chr7 | 50726012 | 50756056 |
| chr7 | 50755886 | 50780736 |
| chr7 | 510808   | 519068   |
| chr7 | 518938   | 551470   |
| chr7 | 5199575  | 5203481  |
| chr7 | 5214232  | 5214704  |
| chr7 | 5359089  | 5359569  |
| chr7 | 5394041  | 5394595  |
| chr7 | 5641153  | 5662565  |
| chr7 | 5902744  | 5905058  |
| chr7 | 596145   | 601555   |
| chr7 | 5999107  | 6002811  |
| chr7 | 6022786  | 6029032  |
| chr7 | 6037423  | 6039014  |
| chr7 | 6037423  | 6039035  |
| chr7 | 6111124  | 6116939  |
| chr7 | 6115322  | 6115726  |
| chr7 | 6115651  | 6135951  |
| chr7 | 6432788  | 6436533  |
| chr7 | 64535818 | 64544432 |
| chr7 | 64541729 | 64544432 |
| chr7 | 6474183  | 6482589  |
| chr7 | 64814917 | 64817335 |
| chr7 | 64851798 | 64858602 |

|      |          |          |
|------|----------|----------|
| chr7 | 65066230 | 65067050 |
| chr7 | 65726770 | 65734350 |
| chr7 | 65727054 | 65734350 |
| chr7 | 65752163 | 65756574 |
| chr7 | 6577720  | 6578534  |
| chr7 | 65960951 | 65974704 |
| chr7 | 65979385 | 65980409 |
| chr7 | 66130743 | 66152474 |
| chr7 | 66152207 | 66153099 |
| chr7 | 66240324 | 66248646 |
| chr7 | 66248528 | 66286709 |
| chr7 | 66271670 | 66286709 |
| chr7 | 66278952 | 66286709 |
| chr7 | 66284577 | 66286709 |
| chr7 | 66286510 | 66307395 |
| chr7 | 66356824 | 66360109 |
| chr7 | 66382236 | 66390250 |
| chr7 | 66395878 | 66402545 |
| chr7 | 66399691 | 66401394 |
| chr7 | 66545600 | 66576932 |
| chr7 | 66551519 | 66576932 |
| chr7 | 66553988 | 66576929 |
| chr7 | 66554584 | 66576929 |
| chr7 | 66554584 | 66576932 |
| chr7 | 66573384 | 66578727 |
| chr7 | 66576754 | 66578727 |
| chr7 | 66633274 | 66633806 |
| chr7 | 66638252 | 66643611 |
| chr7 | 66681423 | 66682258 |
| chr7 | 66710830 | 66712224 |
| chr7 | 66712166 | 66712613 |
| chr7 | 66712166 | 66712957 |
| chr7 | 66712166 | 66713468 |
| chr7 | 66761125 | 66775393 |
| chr7 | 66761125 | 66783841 |
| chr7 | 66770322 | 66775393 |
| chr7 | 66770322 | 66783841 |
| chr7 | 66783674 | 66810847 |
| chr7 | 66795510 | 66805400 |
| chr7 | 66796617 | 66805396 |
| chr7 | 66797373 | 66827578 |
| chr7 | 66808885 | 66810847 |
| chr7 | 6692601  | 6698366  |
| chr7 | 66927641 | 66948694 |
| chr7 | 66933695 | 66945261 |

|      |          |          |
|------|----------|----------|
| chr7 | 66948543 | 66955851 |
| chr7 | 66950951 | 66951268 |
| chr7 | 66950951 | 66955851 |
| chr7 | 66950951 | 66955953 |
| chr7 | 66991136 | 66994282 |
| chr7 | 66993216 | 66994282 |
| chr7 | 67024899 | 67151193 |
| chr7 | 67049948 | 67059915 |
| chr7 | 67083429 | 67084914 |
| chr7 | 67096465 | 67183236 |
| chr7 | 67183125 | 67203899 |
| chr7 | 67308934 | 67320336 |
| chr7 | 677228   | 711523   |
| chr7 | 72694686 | 72715869 |
| chr7 | 72713620 | 72715869 |
| chr7 | 72830750 | 72831798 |
| chr7 | 72830755 | 72831798 |
| chr7 | 72881449 | 72891110 |
| chr7 | 72890626 | 72901128 |
| chr7 | 73489193 | 73517330 |
| chr7 | 73498496 | 73507547 |
| chr7 | 74194740 | 74203294 |
| chr7 | 74375886 | 74377635 |
| chr7 | 74559044 | 74559598 |
| chr7 | 75312892 | 75511114 |
| chr7 | 754588   | 757709   |
| chr7 | 75474703 | 75486247 |
| chr7 | 75507366 | 75511114 |
| chr7 | 7588497  | 7607136  |
| chr7 | 75996444 | 76013887 |
| chr7 | 761752   | 789523   |
| chr7 | 770470   | 785897   |
| chr7 | 77292951 | 77294938 |
| chr7 | 77421766 | 77425399 |
| chr7 | 77765494 | 77778814 |
| chr7 | 77778337 | 77778814 |
| chr7 | 77778337 | 77780774 |
| chr7 | 7786787  | 7801743  |
| chr7 | 7877280  | 7884346  |
| chr7 | 7877280  | 7889229  |
| chr7 | 7877280  | 7892554  |
| chr7 | 79455317 | 79458999 |
| chr7 | 8003907  | 8024814  |
| chr7 | 8003907  | 8048945  |
| chr7 | 80788845 | 80810701 |



|      |           |           |
|------|-----------|-----------|
| chr7 | 80789305  | 80883765  |
| chr7 | 80818298  | 80883765  |
| chr7 | 80915616  | 80916819  |
| chr7 | 815643    | 816673    |
| chr7 | 82170549  | 82184692  |
| chr7 | 8228600   | 8252021   |
| chr7 | 82335134  | 82364813  |
| chr7 | 82335134  | 82366668  |
| chr7 | 82335134  | 82403855  |
| chr7 | 832504    | 833194    |
| chr7 | 832504    | 833229    |
| chr7 | 848417    | 866067    |
| chr7 | 85072993  | 85121931  |
| chr7 | 85121740  | 85153739  |
| chr7 | 85121740  | 85224441  |
| chr7 | 87163238  | 87185980  |
| chr7 | 87836192  | 87860640  |
| chr7 | 87971293  | 87978412  |
| chr7 | 886055    | 895480    |
| chr7 | 90227286  | 90232484  |
| chr7 | 90354457  | 90385168  |
| chr7 | 90354457  | 90385520  |
| chr7 | 90377506  | 90385238  |
| chr7 | 90608529  | 90726812  |
| chr7 | 90716339  | 90726812  |
| chr7 | 90908317  | 90955817  |
| chr7 | 90917600  | 90921955  |
| chr7 | 92240748  | 92245171  |
| chr7 | 92294888  | 92333720  |
| chr7 | 92671425  | 92731744  |
| chr7 | 94618757  | 94644667  |
| chr7 | 96270584  | 96277338  |
| chr7 | 96270584  | 96296951  |
| chr7 | 96277195  | 96309691  |
| chr7 | 99013596  | 99014955  |
| chr7 | 99032771  | 99033121  |
| chr7 | 99491076  | 99494631  |
| chr7 | 99493039  | 99494631  |
| chr7 | 99604385  | 99610601  |
| chr7 | 99903217  | 99917885  |
| chr8 | 100259106 | 100259997 |
| chr8 | 100259106 | 100264785 |
| chr8 | 100259106 | 100275161 |
| chr8 | 100704296 | 100721889 |
| chr8 | 100709132 | 100721886 |

|      |           |           |
|------|-----------|-----------|
| chr8 | 100712478 | 100712651 |
| chr8 | 100717772 | 100721886 |
| chr8 | 101198263 | 101201743 |
| chr8 | 101199194 | 101201743 |
| chr8 | 102302270 | 102312245 |
| chr8 | 102313943 | 102314743 |
| chr8 | 102360070 | 102391161 |
| chr8 | 102834188 | 102836541 |
| chr8 | 102879894 | 102887178 |
| chr8 | 103285837 | 103407784 |
| chr8 | 103400414 | 103403324 |
| chr8 | 103400414 | 103404861 |
| chr8 | 103400414 | 103407784 |
| chr8 | 103430611 | 103437307 |
| chr8 | 103430611 | 103462118 |
| chr8 | 103514017 | 103697296 |
| chr8 | 103644043 | 103697296 |
| chr8 | 103652204 | 103697296 |
| chr8 | 104013441 | 104018277 |
| chr8 | 104013441 | 104148848 |
| chr8 | 104444247 | 104485069 |
| chr8 | 104501193 | 104509074 |
| chr8 | 109164767 | 109245481 |
| chr8 | 109238634 | 109281172 |
| chr8 | 109243150 | 109245481 |
| chr8 | 11295193  | 11300241  |
| chr8 | 11300086  | 11319838  |
| chr8 | 116644485 | 116658980 |
| chr8 | 116719272 | 116726172 |
| chr8 | 116724908 | 116726172 |
| chr8 | 116726015 | 116726522 |
| chr8 | 116726015 | 116734354 |
| chr8 | 116726015 | 116737287 |
| chr8 | 116726015 | 116755797 |
| chr8 | 11808793  | 11838573  |
| chr8 | 11808793  | 11845235  |
| chr8 | 11826078  | 11838573  |
| chr8 | 118375781 | 118379700 |
| chr8 | 118379559 | 118403227 |
| chr8 | 118577679 | 118580893 |
| chr8 | 118580714 | 118585992 |
| chr8 | 118724518 | 118764384 |
| chr8 | 119730135 | 119732186 |
| chr8 | 119731882 | 119778129 |
| chr8 | 119738807 | 119742656 |

|      |           |           |
|------|-----------|-----------|
| chr8 | 119791323 | 119831721 |
| chr8 | 119801793 | 119831721 |
| chr8 | 119803917 | 119819506 |
| chr8 | 119806282 | 119831721 |
| chr8 | 119817983 | 119819506 |
| chr8 | 123015392 | 123030716 |
| chr8 | 123015519 | 123030716 |
| chr8 | 123019194 | 123036954 |
| chr8 | 123380528 | 123381493 |
| chr8 | 123427923 | 123441497 |
| chr8 | 123436452 | 123441497 |
| chr8 | 123436452 | 123448224 |
| chr8 | 124208115 | 124226214 |
| chr8 | 125102013 | 125102487 |
| chr8 | 125102013 | 125182256 |
| chr8 | 125102050 | 125127067 |
| chr8 | 125102050 | 125195272 |
| chr8 | 125130212 | 125151277 |
| chr8 | 125130212 | 125182256 |
| chr8 | 125182102 | 125195272 |
| chr8 | 12723099  | 12743282  |
| chr8 | 127738247 | 127740964 |
| chr8 | 127795893 | 127890998 |
| chr8 | 127816827 | 127890998 |
| chr8 | 127851933 | 127890998 |
| chr8 | 127855154 | 127890998 |
| chr8 | 127855162 | 127890998 |
| chr8 | 127859890 | 127890998 |
| chr8 | 127867438 | 127890998 |
| chr8 | 127882061 | 127890998 |
| chr8 | 127890588 | 127890998 |
| chr8 | 127890588 | 127939676 |
| chr8 | 127939507 | 128010444 |
| chr8 | 127969415 | 127989291 |
| chr8 | 127982359 | 127989291 |
| chr8 | 127983903 | 128010444 |
| chr8 | 127989161 | 127992939 |
| chr8 | 127989161 | 128010444 |
| chr8 | 127989161 | 128032272 |
| chr8 | 128008528 | 128070272 |
| chr8 | 128009589 | 128070272 |
| chr8 | 128070159 | 128073491 |
| chr8 | 129871374 | 129973793 |
| chr8 | 130089766 | 130092143 |
| chr8 | 130188108 | 130290138 |

|      |           |           |
|------|-----------|-----------|
| chr8 | 130214555 | 130290138 |
| chr8 | 130290000 | 130358143 |
| chr8 | 130290000 | 130361771 |
| chr8 | 130290000 | 130401970 |
| chr8 | 130340408 | 130361771 |
| chr8 | 130358016 | 130362366 |
| chr8 | 130358016 | 130402893 |
| chr8 | 130358016 | 130406193 |
| chr8 | 130358016 | 130427822 |
| chr8 | 130401884 | 130406193 |
| chr8 | 130401884 | 130427822 |
| chr8 | 132610165 | 132661627 |
| chr8 | 132777795 | 132817545 |
| chr8 | 132795965 | 132817545 |
| chr8 | 132807684 | 132825371 |
| chr8 | 134599729 | 134610655 |
| chr8 | 140154963 | 140221583 |
| chr8 | 140190874 | 140252929 |
| chr8 | 140275657 | 140409617 |
| chr8 | 140300468 | 140347946 |
| chr8 | 140347756 | 140360193 |
| chr8 | 140347756 | 140405698 |
| chr8 | 140360049 | 140365686 |
| chr8 | 140368017 | 140405698 |
| chr8 | 140397619 | 140409617 |
| chr8 | 140532056 | 140585311 |
| chr8 | 140557258 | 140558484 |
| chr8 | 140572811 | 140597670 |
| chr8 | 140572811 | 140605914 |
| chr8 | 140580904 | 140585311 |
| chr8 | 140585090 | 140585311 |
| chr8 | 140585118 | 140605914 |
| chr8 | 140585118 | 140616346 |
| chr8 | 140686631 | 140687129 |
| chr8 | 140788163 | 140890769 |
| chr8 | 140800458 | 140921132 |
| chr8 | 140818276 | 140921132 |
| chr8 | 140818276 | 140993094 |
| chr8 | 140826978 | 140864399 |
| chr8 | 140826978 | 140890769 |
| chr8 | 140843946 | 140864399 |
| chr8 | 140843946 | 140890769 |
| chr8 | 140846259 | 140893303 |
| chr8 | 140846259 | 140921132 |
| chr8 | 140861223 | 140890769 |

|      |           |           |
|------|-----------|-----------|
| chr8 | 140864311 | 140912467 |
| chr8 | 140874462 | 140890769 |
| chr8 | 140879503 | 140890769 |
| chr8 | 141136508 | 141138137 |
| chr8 | 141136508 | 141168525 |
| chr8 | 141150833 | 141155989 |
| chr8 | 141151618 | 141155989 |
| chr8 | 141237748 | 141254629 |
| chr8 | 143580059 | 143586852 |
| chr8 | 143597004 | 143597347 |
| chr8 | 143809047 | 143809550 |
| chr8 | 144357139 | 144357438 |
| chr8 | 144383080 | 144394573 |
| chr8 | 144515484 | 144515763 |
| chr8 | 15613379  | 15673836  |
| chr8 | 15613470  | 15673836  |
| chr8 | 1564004   | 1565894   |
| chr8 | 1565682   | 1569751   |
| chr8 | 1565682   | 1583112   |
| chr8 | 1565682   | 1590363   |
| chr8 | 1626739   | 1655057   |
| chr8 | 17064083  | 17120401  |
| chr8 | 17077782  | 17120401  |
| chr8 | 17098457  | 17120401  |
| chr8 | 17104390  | 17120401  |
| chr8 | 18632612  | 18674840  |
| chr8 | 19842816  | 19844238  |
| chr8 | 22139082  | 22139415  |
| chr8 | 22498000  | 22505769  |
| chr8 | 23042040  | 23043243  |
| chr8 | 23068750  | 23069011  |
| chr8 | 25242194  | 25243757  |
| chr8 | 28737518  | 28750763  |
| chr8 | 30101897  | 30106843  |
| chr8 | 30578365  | 30614715  |
| chr8 | 30786210  | 30799755  |
| chr8 | 33372643  | 33389798  |
| chr8 | 38105984  | 38115000  |
| chr8 | 38266140  | 38269517  |
| chr8 | 38314646  | 38348143  |
| chr8 | 38456316  | 38457534  |
| chr8 | 38457355  | 38457955  |
| chr8 | 38819521  | 38827288  |
| chr8 | 38917541  | 38918070  |
| chr8 | 39076146  | 39091346  |

|      |          |          |
|------|----------|----------|
| chr8 | 39101862 | 39103952 |
| chr8 | 41974685 | 41987563 |
| chr8 | 42048377 | 42049707 |
| chr8 | 42325969 | 42329226 |
| chr8 | 42925556 | 42946238 |
| chr8 | 42949319 | 42966613 |
| chr8 | 42986654 | 42988641 |
| chr8 | 43059091 | 43085396 |
| chr8 | 43076363 | 43077364 |
| chr8 | 47273336 | 47440542 |
| chr8 | 47279861 | 47300097 |
| chr8 | 47279861 | 47326985 |
| chr8 | 47279861 | 47330895 |
| chr8 | 47284027 | 47300097 |
| chr8 | 47388340 | 47440542 |
| chr8 | 47394977 | 47440542 |
| chr8 | 47407860 | 47461951 |
| chr8 | 47440322 | 47491994 |
| chr8 | 47781811 | 47782254 |
| chr8 | 47834428 | 47836337 |
| chr8 | 47969797 | 47976866 |
| chr8 | 48034865 | 48043181 |
| chr8 | 48043032 | 48043626 |
| chr8 | 48043032 | 48062187 |
| chr8 | 51845660 | 51870390 |
| chr8 | 51857459 | 51861246 |
| chr8 | 51857492 | 51861246 |
| chr8 | 51860844 | 51870963 |
| chr8 | 52685398 | 52686156 |
| chr8 | 53993667 | 53995866 |
| chr8 | 54136510 | 54147544 |
| chr8 | 54147381 | 54148266 |
| chr8 | 55750963 | 55770258 |
| chr8 | 55785891 | 55786214 |
| chr8 | 55798247 | 55805036 |
| chr8 | 55941854 | 55947841 |
| chr8 | 56073694 | 56074493 |
| chr8 | 56963834 | 56980197 |
| chr8 | 56963962 | 56966352 |
| chr8 | 56963962 | 56980197 |
| chr8 | 61492382 | 61584029 |
| chr8 | 61546845 | 61567318 |
| chr8 | 61546874 | 61548208 |
| chr8 | 61661805 | 61684188 |
| chr8 | 61676139 | 61684188 |

|      |          |          |
|------|----------|----------|
| chr8 | 61679276 | 61684188 |
| chr8 | 6480713  | 6503387  |
| chr8 | 65609920 | 65613433 |
| chr8 | 65719224 | 65727301 |
| chr8 | 67103036 | 67116156 |
| chr8 | 67128225 | 67132080 |
| chr8 | 67299208 | 67320512 |
| chr8 | 67302435 | 67308232 |
| chr8 | 677500   | 692612   |
| chr8 | 690897   | 692612   |
| chr8 | 690897   | 716007   |
| chr8 | 70256437 | 70296800 |
| chr8 | 70637814 | 70641050 |
| chr8 | 70637814 | 70644243 |
| chr8 | 70669849 | 70707153 |
| chr8 | 70680780 | 70713576 |
| chr8 | 71954137 | 71963048 |
| chr8 | 71962922 | 71973659 |
| chr8 | 72052538 | 72062365 |
| chr8 | 72052538 | 72076627 |
| chr8 | 73527690 | 73561539 |
| chr8 | 73527690 | 73688813 |
| chr8 | 73527690 | 73709162 |
| chr8 | 73668980 | 73739868 |
| chr8 | 73673106 | 73697442 |
| chr8 | 73673106 | 73744889 |
| chr8 | 73688172 | 73688813 |
| chr8 | 73805650 | 73850594 |
| chr8 | 73946752 | 73956054 |
| chr8 | 74658411 | 74752533 |
| chr8 | 78558342 | 78572939 |
| chr8 | 78697406 | 78702116 |
| chr8 | 79917977 | 79919148 |
| chr8 | 79993976 | 80003180 |
| chr8 | 80002998 | 80009611 |
| chr8 | 80499493 | 80577167 |
| chr8 | 81829429 | 81840356 |
| chr8 | 85281229 | 85281639 |
| chr8 | 86494828 | 86507112 |
| chr8 | 88167668 | 88327186 |
| chr8 | 89724628 | 89728755 |
| chr8 | 89765340 | 89790412 |
| chr8 | 90015594 | 90044995 |
| chr8 | 90978578 | 90985841 |
| chr8 | 91018389 | 91024366 |

|      |          |          |
|------|----------|----------|
| chr8 | 91078355 | 91102844 |
| chr8 | 91097038 | 91102844 |
| chr8 | 91097038 | 91219005 |
| chr8 | 91102218 | 91102844 |
| chr8 | 91102218 | 91133305 |
| chr8 | 91200612 | 91219005 |
| chr8 | 91218049 | 91219005 |
| chr8 | 92916928 | 92929574 |
| chr8 | 92916928 | 92930707 |
| chr8 | 93706044 | 93718788 |
| chr8 | 93922015 | 94020460 |
| chr8 | 94411120 | 94418783 |
| chr8 | 94418655 | 94467555 |
| chr8 | 94454146 | 94458436 |
| chr8 | 94506499 | 94511423 |
| chr8 | 94766611 | 94767052 |
| chr8 | 94827318 | 94859632 |
| chr8 | 95035453 | 95036494 |
| chr8 | 96256961 | 96260247 |
| chr8 | 9649318  | 9710220  |
| chr8 | 96680442 | 96785330 |
| chr8 | 96834972 | 96850238 |
| chr8 | 96879797 | 96884493 |
| chr8 | 96879797 | 96902096 |
| chr8 | 97691255 | 97699852 |
| chr8 | 97802620 | 97819238 |
| chr8 | 98117317 | 98123479 |
| chr8 | 98212404 | 98217262 |
| chr8 | 98526741 | 98529652 |
| chr8 | 98693136 | 98707311 |
| chr8 | 98706466 | 98722818 |
| chr8 | 98706466 | 98722969 |
| chr8 | 98706466 | 98728621 |
| chr8 | 98746709 | 98749390 |
| chr8 | 98746709 | 98774819 |
| chr8 | 99013759 | 99064287 |
| chr8 | 99038422 | 99041418 |
| chr8 | 99134234 | 99156743 |
| chr8 | 99236270 | 99275254 |
| chr8 | 99274197 | 99289762 |
| chr8 | 99274197 | 99328914 |
| chr8 | 99384207 | 99400135 |
| chr8 | 99419915 | 99577633 |
| chr8 | 99520898 | 99585517 |
| chr8 | 99575657 | 99585517 |



|      |           |           |
|------|-----------|-----------|
| chr8 | 99878139  | 99887618  |
| chr9 | 100006505 | 100022204 |
| chr9 | 100072546 | 100126549 |
| chr9 | 100101695 | 100126549 |
| chr9 | 100102119 | 100126549 |
| chr9 | 100126382 | 100131954 |
| chr9 | 100450556 | 100471231 |
| chr9 | 100450556 | 100516771 |
| chr9 | 100456742 | 100509134 |
| chr9 | 100457757 | 100572676 |
| chr9 | 105273496 | 105309866 |
| chr9 | 105460720 | 105472005 |
| chr9 | 105573654 | 105603816 |
| chr9 | 105613301 | 105620061 |
| chr9 | 105705596 | 105738880 |
| chr9 | 105714365 | 105748190 |
| chr9 | 105721536 | 105774026 |
| chr9 | 106938915 | 106939915 |
| chr9 | 109050282 | 109078943 |
| chr9 | 109060353 | 109091152 |
| chr9 | 109073247 | 109093591 |
| chr9 | 109087172 | 109091152 |
| chr9 | 109780487 | 109828032 |
| chr9 | 109931926 | 109943381 |
| chr9 | 110015953 | 110016354 |
| chr9 | 110156318 | 110198574 |
| chr9 | 110874905 | 110875722 |
| chr9 | 110897494 | 110973558 |
| chr9 | 110941420 | 111005539 |
| chr9 | 110941420 | 111009201 |
| chr9 | 110941420 | 111011690 |
| chr9 | 110941420 | 111036201 |
| chr9 | 110972072 | 111005539 |
| chr9 | 110972072 | 111011690 |
| chr9 | 110972072 | 111036201 |
| chr9 | 111564156 | 111586165 |
| chr9 | 111574733 | 111589382 |
| chr9 | 111914604 | 111915836 |
| chr9 | 111914604 | 111917806 |
| chr9 | 111932359 | 111932825 |
| chr9 | 112098469 | 112130844 |
| chr9 | 112142319 | 112160980 |
| chr9 | 112275843 | 112288682 |
| chr9 | 113408780 | 113410140 |
| chr9 | 113594429 | 113597167 |

|      |           |           |
|------|-----------|-----------|
| chr9 | 120821354 | 120823076 |
| chr9 | 121699324 | 121699661 |
| chr9 | 121770724 | 121772557 |
| chr9 | 121822106 | 121822879 |
| chr9 | 122280442 | 122286166 |
| chr9 | 122280442 | 122322745 |
| chr9 | 122285168 | 122286166 |
| chr9 | 122291748 | 122294362 |
| chr9 | 122313226 | 122322745 |
| chr9 | 122313226 | 122322812 |
| chr9 | 122957010 | 122979040 |
| chr9 | 122957148 | 122990213 |
| chr9 | 122996684 | 123020459 |
| chr9 | 123169901 | 123236969 |
| chr9 | 123401704 | 123440491 |
| chr9 | 123440359 | 123452908 |
| chr9 | 123457347 | 123462024 |
| chr9 | 123548003 | 123557695 |
| chr9 | 123557569 | 123562941 |
| chr9 | 123557569 | 123565648 |
| chr9 | 123736293 | 123879021 |
| chr9 | 123739789 | 123757822 |
| chr9 | 123757702 | 123917176 |
| chr9 | 123757702 | 123923415 |
| chr9 | 124353541 | 124384656 |
| chr9 | 124554327 | 124684986 |
| chr9 | 124733307 | 124738427 |
| chr9 | 124885359 | 124888396 |
| chr9 | 124922626 | 124923223 |
| chr9 | 124994666 | 124999990 |
| chr9 | 125207563 | 125208812 |
| chr9 | 125220326 | 125220700 |
| chr9 | 125297428 | 125299106 |
| chr9 | 125337017 | 125337568 |
| chr9 | 125478079 | 125484583 |
| chr9 | 125478079 | 125506417 |
| chr9 | 125543058 | 125550697 |
| chr9 | 125557889 | 125559809 |
| chr9 | 125583405 | 125585727 |
| chr9 | 125656179 | 125672643 |
| chr9 | 125657650 | 125672540 |
| chr9 | 126338926 | 126386658 |
| chr9 | 126370164 | 126395697 |
| chr9 | 126380500 | 126421948 |
| chr9 | 126380526 | 126395697 |

|      |           |           |
|------|-----------|-----------|
| chr9 | 126976570 | 127069356 |
| chr9 | 127243078 | 127265021 |
| chr9 | 127243078 | 127365366 |
| chr9 | 127428831 | 127445249 |
| chr9 | 127449382 | 127449609 |
| chr9 | 127449389 | 127449609 |
| chr9 | 128309678 | 128311601 |
| chr9 | 128474686 | 128482887 |
| chr9 | 128507215 | 128509097 |
| chr9 | 128598399 | 128599104 |
| chr9 | 128612246 | 128613346 |
| chr9 | 128705543 | 128705701 |
| chr9 | 129908889 | 129909499 |
| chr9 | 129978464 | 129999059 |
| chr9 | 130593642 | 130595588 |
| chr9 | 130851393 | 130875052 |
| chr9 | 130854063 | 130887414 |
| chr9 | 131077898 | 131079298 |
| chr9 | 131174086 | 131178410 |
| chr9 | 131233453 | 131233915 |
| chr9 | 131430093 | 131432794 |
| chr9 | 131430093 | 131439061 |
| chr9 | 131430093 | 131447804 |
| chr9 | 131459163 | 131459563 |
| chr9 | 131477949 | 131478446 |
| chr9 | 131630235 | 131647750 |
| chr9 | 131939380 | 131947831 |
| chr9 | 132014336 | 132044012 |
| chr9 | 132014336 | 132060373 |
| chr9 | 13216773  | 13258733  |
| chr9 | 13247634  | 13259059  |
| chr9 | 13247634  | 13276771  |
| chr9 | 132677976 | 132689065 |
| chr9 | 132896788 | 132897183 |
| chr9 | 133333717 | 133367445 |
| chr9 | 133351835 | 133356320 |
| chr9 | 133407905 | 133408767 |
| chr9 | 133925842 | 133939219 |
| chr9 | 135850136 | 135857673 |
| chr9 | 135866455 | 135888273 |
| chr9 | 135881632 | 135888273 |
| chr9 | 135933056 | 135933515 |
| chr9 | 136226773 | 136232441 |
| chr9 | 136416950 | 136423677 |
| chr9 | 136432639 | 136432955 |

|      |           |           |
|------|-----------|-----------|
| chr9 | 136544023 | 136677556 |
| chr9 | 136726582 | 136727045 |
| chr9 | 137175499 | 137175707 |
| chr9 | 137175501 | 137175707 |
| chr9 | 137188778 | 137189046 |
| chr9 | 137272222 | 137272481 |
| chr9 | 137727166 | 137728529 |
| chr9 | 137727166 | 137744090 |
| chr9 | 137727166 | 137762820 |
| chr9 | 137728348 | 137731583 |
| chr9 | 137743391 | 137758011 |
| chr9 | 137743391 | 137762820 |
| chr9 | 137743394 | 137754291 |
| chr9 | 137743394 | 137762820 |
| chr9 | 137815946 | 137835088 |
| chr9 | 137834348 | 137835088 |
| chr9 | 14592493  | 14640012  |
| chr9 | 14602717  | 14640012  |
| chr9 | 14602717  | 14680162  |
| chr9 | 14609849  | 14674385  |
| chr9 | 15465484  | 15469993  |
| chr9 | 15563977  | 15597787  |
| chr9 | 15597629  | 15623413  |
| chr9 | 15622737  | 15623413  |
| chr9 | 17330234  | 17342444  |
| chr9 | 19267012  | 19290876  |
| chr9 | 19305415  | 19316839  |
| chr9 | 19350701  | 19352693  |
| chr9 | 20410560  | 20414425  |
| chr9 | 20711753  | 20885230  |
| chr9 | 20715321  | 20740303  |
| chr9 | 20819795  | 20825852  |
| chr9 | 20923659  | 20933132  |
| chr9 | 2181570   | 2192802   |
| chr9 | 21859302  | 21862135  |
| chr9 | 21859302  | 21862142  |
| chr9 | 21859302  | 21864433  |
| chr9 | 21859302  | 21866842  |
| chr9 | 21859302  | 21872928  |
| chr9 | 21859302  | 21890838  |
| chr9 | 2191265   | 2192802   |
| chr9 | 21939159  | 22097364  |
| chr9 | 22723308  | 22757076  |
| chr9 | 22820737  | 22821707  |
| chr9 | 23602654  | 23659677  |

|      |          |          |
|------|----------|----------|
| chr9 | 23762005 | 23765099 |
| chr9 | 2493074  | 2539552  |
| chr9 | 2536358  | 2552338  |
| chr9 | 26798510 | 26884885 |
| chr9 | 26842274 | 26887513 |
| chr9 | 2720343  | 2820098  |
| chr9 | 27455132 | 27459872 |
| chr9 | 2782755  | 2812362  |
| chr9 | 2804238  | 2812362  |
| chr9 | 2804256  | 2812362  |
| chr9 | 2804321  | 2812362  |
| chr9 | 32924896 | 32974561 |
| chr9 | 32987543 | 32987846 |
| chr9 | 33293679 | 33295427 |
| chr9 | 33295284 | 33313793 |
| chr9 | 3330258  | 3363488  |
| chr9 | 3330258  | 3416712  |
| chr9 | 3330258  | 3420870  |
| chr9 | 33351559 | 33370014 |
| chr9 | 33366628 | 33370014 |
| chr9 | 33948373 | 33948568 |
| chr9 | 33956857 | 33963791 |
| chr9 | 34249778 | 34255986 |
| chr9 | 34338712 | 34343583 |
| chr9 | 34338712 | 34346837 |
| chr9 | 35050063 | 35059801 |
| chr9 | 35661712 | 35664850 |
| chr9 | 35684573 | 35685063 |
| chr9 | 35707920 | 35708340 |
| chr9 | 36217256 | 36220020 |
| chr9 | 36223034 | 36223372 |
| chr9 | 36369718 | 36372593 |
| chr9 | 36580072 | 36583712 |
| chr9 | 36580072 | 36589652 |
| chr9 | 37121498 | 37305714 |
| chr9 | 37126311 | 37127263 |
| chr9 | 37126311 | 37147445 |
| chr9 | 37126311 | 37165935 |
| chr9 | 37126311 | 37190651 |
| chr9 | 37126311 | 37206494 |
| chr9 | 37126311 | 37219098 |
| chr9 | 37126311 | 37247130 |
| chr9 | 37126311 | 37249594 |
| chr9 | 37126311 | 37260565 |
| chr9 | 37436660 | 37436960 |

|      |          |          |
|------|----------|----------|
| chr9 | 37780657 | 37784063 |
| chr9 | 37842088 | 37861235 |
| chr9 | 37842088 | 37861385 |
| chr9 | 41008880 | 41033022 |
| chr9 | 41025763 | 41027092 |
| chr9 | 41025763 | 41027114 |
| chr9 | 41923892 | 41929444 |
| chr9 | 4286037  | 4286435  |
| chr9 | 4541032  | 4622510  |
| chr9 | 4676461  | 4676749  |
| chr9 | 4799158  | 4827033  |
| chr9 | 4823547  | 4828688  |
| chr9 | 4823547  | 4860901  |
| chr9 | 4849446  | 4860901  |
| chr9 | 4860124  | 4860901  |
| chr9 | 4860124  | 4928266  |
| chr9 | 4860124  | 4928312  |
| chr9 | 4966106  | 5044520  |
| chr9 | 537024   | 540667   |
| chr9 | 539676   | 540667   |
| chr9 | 5656582  | 5666072  |
| chr9 | 5787060  | 5787593  |
| chr9 | 5933441  | 5944960  |
| chr9 | 6420911  | 6465846  |
| chr9 | 6433913  | 6445540  |
| chr9 | 64465758 | 64466310 |
| chr9 | 6460572  | 6465846  |
| chr9 | 6719070  | 6720997  |
| chr9 | 6830673  | 6893232  |
| chr9 | 6843548  | 6893232  |
| chr9 | 69064937 | 69072830 |
| chr9 | 69718435 | 69750950 |
| chr9 | 7103684  | 7105500  |
| chr9 | 71749756 | 71750385 |
| chr9 | 71750042 | 71805209 |
| chr9 | 71862550 | 71875083 |
| chr9 | 71874613 | 71886414 |
| chr9 | 71918424 | 71947112 |
| chr9 | 71947005 | 71952132 |
| chr9 | 74996446 | 75027151 |
| chr9 | 75077158 | 75080941 |
| chr9 | 75932378 | 75934724 |
| chr9 | 77794462 | 77824880 |
| chr9 | 77919265 | 77922345 |
| chr9 | 77920647 | 77922345 |

|      |          |          |
|------|----------|----------|
| chr9 | 77920661 | 77922345 |
| chr9 | 77922160 | 77931856 |
| chr9 | 77922160 | 77952431 |
| chr9 | 81590804 | 81593248 |
| chr9 | 83585552 | 83686155 |
| chr9 | 83598742 | 83739744 |
| chr9 | 83659779 | 83669327 |
| chr9 | 83659779 | 83677961 |
| chr9 | 83659779 | 83686155 |
| chr9 | 83661776 | 83669327 |
| chr9 | 83677726 | 83686076 |
| chr9 | 83739700 | 83768970 |
| chr9 | 85822879 | 85830437 |
| chr9 | 88415606 | 88426591 |
| chr9 | 88416643 | 88426591 |
| chr9 | 88416643 | 88448989 |
| chr9 | 88418849 | 88448989 |
| chr9 | 88421331 | 88462749 |
| chr9 | 88426381 | 88433828 |
| chr9 | 88426381 | 88434829 |
| chr9 | 88426381 | 88475457 |
| chr9 | 88426381 | 88475513 |
| chr9 | 89314719 | 89315297 |
| chr9 | 91264916 | 91356155 |
| chr9 | 91325317 | 91327651 |
| chr9 | 91775740 | 91913127 |
| chr9 | 92262135 | 92269983 |
| chr9 | 92337540 | 92347506 |
| chr9 | 92637190 | 92638280 |
| chr9 | 93470328 | 93476338 |
| chr9 | 93470328 | 93498886 |
| chr9 | 93471262 | 93527242 |
| chr9 | 93628415 | 93636525 |
| chr9 | 93629969 | 93637695 |
| chr9 | 94057117 | 94088263 |
| chr9 | 94274205 | 94293069 |
| chr9 | 94773001 | 94802519 |
| chr9 | 94790348 | 94956015 |
| chr9 | 95101614 | 95111637 |
| chr9 | 95135345 | 95186645 |
| chr9 | 95149922 | 95186645 |
| chr9 | 95240648 | 95265754 |
| chr9 | 95880868 | 95882340 |
| chr9 | 95978060 | 95979866 |
| chr9 | 95978060 | 96012357 |

|             |           |           |
|-------------|-----------|-----------|
| chr9        | 96004245  | 96004701  |
| chr9        | 96004519  | 96012357  |
| chr9        | 96465336  | 96484659  |
| chr9        | 96509672  | 96611559  |
| chr9        | 96515648  | 96565483  |
| chr9        | 96522505  | 96611559  |
| chr9        | 96774787  | 96845016  |
| chr9        | 96949554  | 96962963  |
| chr9        | 97675488  | 97693759  |
| chr9        | 98015363  | 98018489  |
| chr9        | 98069458  | 98078347  |
| chr9        | 98075569  | 98078347  |
| chr9        | 99128854  | 99149301  |
| chr9        | 99913989  | 99928843  |
| Un_GL00019! | 48954     | 50014     |
| chrX        | 100914620 | 100915083 |
| chrX        | 100914620 | 100923061 |
| chrX        | 101010522 | 101019403 |
| chrX        | 101010609 | 101019403 |
| chrX        | 101109501 | 101148161 |
| chrX        | 102814979 | 102817082 |
| chrX        | 102816991 | 102839972 |
| chrX        | 102825992 | 102865152 |
| chrX        | 102826968 | 102834976 |
| chrX        | 102826968 | 102905737 |
| chrX        | 102829887 | 102865152 |
| chrX        | 102834627 | 102865152 |
| chrX        | 102839800 | 102897764 |
| chrX        | 102839800 | 102905737 |
| chrX        | 102865041 | 102905737 |
| chrX        | 102884142 | 102905737 |
| chrX        | 103517373 | 103531322 |
| chrX        | 103517373 | 103585660 |
| chrX        | 104175622 | 104189804 |
| chrX        | 106980890 | 106985250 |
| chrX        | 107150855 | 107153503 |
| chrX        | 107154095 | 107206431 |
| chrX        | 107639294 | 107650157 |
| chrX        | 108440005 | 108539805 |
| chrX        | 109659353 | 109683375 |
| chrX        | 110020351 | 110067396 |
| chrX        | 110020351 | 110109146 |
| chrX        | 110046356 | 110109146 |
| chrX        | 110067346 | 110173453 |
| chrX        | 110109079 | 110173453 |



|      |           |           |
|------|-----------|-----------|
| chrX | 110171419 | 110173453 |
| chrX | 110216517 | 110220749 |
| chrX | 110264488 | 110279274 |
| chrX | 111742200 | 111744904 |
| chrX | 111757587 | 111764887 |
| chrX | 112822254 | 112825220 |
| chrX | 115629197 | 115649626 |
| chrX | 115946385 | 115951383 |
| chrX | 118396969 | 118425042 |
| chrX | 118737326 | 118749778 |
| chrX | 118989407 | 119017689 |
| chrX | 119406459 | 119426354 |
| chrX | 119406459 | 119433744 |
| chrX | 119410189 | 119417640 |
| chrX | 119410189 | 119419344 |
| chrX | 119410189 | 119426354 |
| chrX | 119410189 | 119443897 |
| chrX | 119616416 | 119640788 |
| chrX | 120229403 | 120240355 |
| chrX | 123590584 | 123611516 |
| chrX | 123610977 | 123611439 |
| chrX | 1282441   | 1290509   |
| chrX | 129576353 | 129588263 |
| chrX | 129806313 | 129829141 |
| chrX | 129994374 | 130005317 |
| chrX | 130783546 | 130809261 |
| chrX | 131692437 | 131794466 |
| chrX | 131695843 | 131794466 |
| chrX | 131711650 | 131785258 |
| chrX | 131731128 | 131794466 |
| chrX | 131736126 | 131794466 |
| chrX | 131743095 | 131749458 |
| chrX | 131743095 | 131756709 |
| chrX | 131743095 | 131784039 |
| chrX | 131743095 | 131794466 |
| chrX | 131749305 | 131770551 |
| chrX | 131749305 | 131772563 |
| chrX | 131749305 | 131785258 |
| chrX | 131749305 | 131794464 |
| chrX | 131755597 | 131777744 |
| chrX | 131755597 | 131785258 |
| chrX | 131768548 | 131785258 |
| chrX | 131777622 | 131784039 |
| chrX | 131777622 | 131805037 |
| chrX | 131783886 | 131785258 |

|      |           |           |
|------|-----------|-----------|
| chrX | 131783886 | 131794115 |
| chrX | 131793993 | 131805037 |
| chrX | 135276074 | 135296039 |
| chrX | 135287252 | 135296039 |
| chrX | 135347018 | 135361601 |
| chrX | 135906023 | 135920392 |
| chrX | 136870193 | 136875585 |
| chrX | 1386681   | 1389727   |
| chrX | 1396371   | 1412888   |
| chrX | 139814877 | 139886581 |
| chrX | 14007727  | 14026221  |
| chrX | 147924918 | 147945616 |
| chrX | 14843659  | 14859334  |
| chrX | 148543951 | 148662768 |
| chrX | 150744360 | 150751240 |
| chrX | 152320808 | 152364596 |
| chrX | 152345580 | 152487023 |
| chrX | 152364430 | 152458262 |
| chrX | 152862595 | 152869596 |
| chrX | 153454540 | 153454876 |
| chrX | 154012528 | 154012894 |
| chrX | 154030297 | 154032557 |
| chrX | 154349648 | 154352423 |
| chrX | 154359245 | 154359535 |
| chrX | 154490379 | 154490593 |
| chrX | 154506648 | 154507329 |
| chrX | 155046508 | 155047391 |
| chrX | 155116056 | 155132869 |
| chrX | 155334370 | 155335249 |
| chrX | 155351859 | 155419562 |
| chrX | 155506897 | 155537118 |
| chrX | 155545095 | 155548224 |
| chrX | 155889495 | 155900587 |
| chrX | 15688660  | 15750165  |
| chrX | 19456912  | 19466698  |
| chrX | 19456912  | 19466743  |
| chrX | 19456912  | 19466759  |
| chrX | 19588902  | 19592066  |
| chrX | 19803009  | 19836282  |
| chrX | 19836124  | 19857714  |
| chrX | 19929784  | 19936626  |
| chrX | 19950752  | 19959157  |
| chrX | 21513541  | 21516631  |
| chrX | 21978874  | 21992712  |
| chrX | 2211488   | 2221229   |

|      |          |          |
|------|----------|----------|
| chrX | 2240553  | 2243230  |
| chrX | 23721880 | 23736246 |
| chrX | 2392353  | 2425304  |
| chrX | 2424505  | 2425304  |
| chrX | 24493744 | 24494883 |
| chrX | 24821451 | 24855481 |
| chrX | 24840322 | 24888122 |
| chrX | 338603   | 361519   |
| chrX | 338603   | 362332   |
| chrX | 361404   | 362332   |
| chrX | 37354812 | 37426000 |
| chrX | 3817544  | 3818500  |
| chrX | 3817544  | 3818703  |
| chrX | 40052112 | 40071159 |
| chrX | 40697023 | 40715220 |
| chrX | 40712913 | 40715220 |
| chrX | 40713777 | 40715220 |
| chrX | 41165871 | 41168132 |
| chrX | 41184535 | 41189475 |
| chrX | 44524001 | 44527365 |
| chrX | 44524001 | 44538542 |
| chrX | 44956424 | 45020730 |
| chrX | 45070119 | 45083608 |
| chrX | 46620976 | 46653705 |
| chrX | 46620976 | 46653713 |
| chrX | 46651109 | 46653705 |
| chrX | 46679677 | 46685066 |
| chrX | 46984883 | 47000391 |
| chrX | 47222260 | 47228644 |
| chrX | 47842649 | 47895940 |
| chrX | 48046202 | 48067061 |
| chrX | 48575560 | 48576083 |
| chrX | 49113550 | 49113938 |
| chrX | 50042315 | 50048103 |
| chrX | 50204562 | 50288887 |
| chrX | 53561755 | 53562271 |
| chrX | 53575810 | 53576899 |
| chrX | 54558435 | 54560647 |
| chrX | 56977072 | 56994949 |
| chrX | 57262123 | 57381029 |
| chrX | 63399780 | 63432491 |
| chrX | 63509943 | 63517082 |
| chrX | 63637994 | 63678572 |
| chrX | 63638049 | 63666017 |
| chrX | 63638108 | 63697304 |

|       |           |           |
|-------|-----------|-----------|
| chrX  | 63722761  | 63724711  |
| chrX  | 63724531  | 63743446  |
| chrX  | 64193138  | 64193384  |
| chrX  | 65366637  | 65499989  |
| chrX  | 65445905  | 65499989  |
| chrX  | 68046993  | 68053810  |
| chrX  | 68047127  | 68053810  |
| chrX  | 68053644  | 68073322  |
| chrX  | 68081700  | 68097029  |
| chrX  | 68081700  | 68206673  |
| chrX  | 68299000  | 68307448  |
| chrX  | 68838616  | 68840570  |
| chrX  | 69528992  | 69530532  |
| chrX  | 70290753  | 70341931  |
| chrX  | 71061027  | 71062949  |
| chrX  | 71121720  | 71122346  |
| chrX  | 71141882  | 71142946  |
| chrX  | 72272639  | 72273972  |
| chrX  | 72272639  | 72275724  |
| chrX  | 72462003  | 72474729  |
| chrX  | 72462003  | 72573724  |
| chrX  | 73563226  | 73584572  |
| chrX  | 73577406  | 73591135  |
| chrX  | 74060077  | 74062148  |
| chrX  | 74274341  | 74286170  |
| chrX  | 74592342  | 74596000  |
| chrX  | 74611034  | 74612581  |
| chrX  | 77557450  | 77595785  |
| chrX  | 77574249  | 77595785  |
| chrX  | 77829030  | 77830895  |
| chrX  | 77870807  | 77879613  |
| chrX  | 78129678  | 78131773  |
| chrX  | 81276983  | 81298357  |
| chrX  | 84321841  | 84361612  |
| chrX  | 84321930  | 84344457  |
| chrX  | 85067126  | 85074400  |
| chrX  | 91414903  | 91418871  |
| chrX  | 9640272   | 9725670   |
| chrX  | 96942057  | 97141794  |
| chr10 | 110228188 | 110280085 |
| chr10 | 115215696 | 115334419 |
| chr10 | 12160929  | 12167893  |
| chr10 | 121836717 | 121924329 |
| chr10 | 121841081 | 121924329 |
| chr10 | 121870005 | 121924329 |

|       |           |           |
|-------|-----------|-----------|
| chr10 | 131934457 | 131935006 |
| chr10 | 16947234  | 16950111  |
| chr10 | 27046352  | 27061242  |
| chr10 | 27048800  | 27061242  |
| chr10 | 27060344  | 27061242  |
| chr10 | 27060344  | 27079161  |
| chr10 | 27066486  | 27067286  |
| chr10 | 27066486  | 27086609  |
| chr10 | 27907662  | 27971313  |
| chr10 | 27935009  | 27971313  |
| chr10 | 28056479  | 28059743  |
| chr10 | 28069771  | 28089841  |
| chr10 | 31808648  | 31814361  |
| chr10 | 32462682  | 32474023  |
| chr10 | 32685969  | 32729457  |
| chr10 | 32805014  | 32824604  |
| chr10 | 45618139  | 45639963  |
| chr10 | 45624582  | 45627105  |
| chr10 | 68121437  | 68136731  |
| chr10 | 68135458  | 68161752  |
| chr10 | 68651845  | 68667256  |
| chr10 | 73310157  | 73341581  |
| chr10 | 73335429  | 73341581  |
| chr10 | 91222688  | 91251440  |
| chr10 | 94341672  | 94349378  |
| chr10 | 94687769  | 94724533  |
| chr10 | 99955213  | 99972134  |
| chr11 | 100959882 | 100965776 |
| chr11 | 117239111 | 117239800 |
| chr11 | 123577366 | 123578430 |
| chr11 | 125978303 | 126023537 |
| chr11 | 14789105  | 14844026  |
| chr11 | 15177110  | 15190814  |
| chr11 | 26678711  | 26686544  |
| chr11 | 26678711  | 26703947  |
| chr11 | 46727995  | 46728837  |
| chr11 | 47663025  | 47699553  |
| chr11 | 47699445  | 47704728  |
| chr11 | 58549785  | 58554940  |
| chr11 | 61264486  | 61269018  |
| chr11 | 61280623  | 61282905  |
| chr11 | 62702467  | 62717189  |
| chr11 | 64626462  | 64650638  |
| chr11 | 64751324  | 64752071  |
| chr11 | 6538382   | 6540083   |

|       |           |           |
|-------|-----------|-----------|
| chr11 | 72605137  | 72631139  |
| chr11 | 76360955  | 76365972  |
| chr11 | 86386050  | 86392797  |
| chr11 | 86386050  | 86400801  |
| chr11 | 9047942   | 9053215   |
| chr11 | 9065890   | 9069495   |
| chr12 | 101729108 | 101737948 |
| chr12 | 110503805 | 110522411 |
| chr12 | 116964696 | 116988869 |
| chr12 | 116964696 | 117010450 |
| chr12 | 116985205 | 116988869 |
| chr12 | 116985205 | 117010450 |
| chr12 | 121244572 | 121248734 |
| chr12 | 121923621 | 121931886 |
| chr12 | 124340005 | 124342074 |
| chr12 | 132869618 | 132877654 |
| chr12 | 19348398  | 19369798  |
| chr12 | 22506710  | 22519239  |
| chr12 | 405510    | 418636    |
| chr12 | 43425513  | 43430471  |
| chr12 | 57046551  | 57048343  |
| chr12 | 57799794  | 57801212  |
| chr12 | 6110373   | 6110968   |
| chr12 | 66306344  | 66325126  |
| chr12 | 66331153  | 66338212  |
| chr12 | 6643538   | 6645337   |
| chr12 | 68727350  | 68735344  |
| chr12 | 68733451  | 68735344  |
| chr12 | 7110297   | 7119553   |
| chr12 | 71907021  | 71918548  |
| chr12 | 75282250  | 75321576  |
| chr12 | 79285786  | 79299551  |
| chr12 | 79285786  | 79353619  |
| chr12 | 85152279  | 85154094  |
| chr12 | 878214    | 882073    |
| chr12 | 878214    | 897681    |
| chr12 | 89621548  | 89635251  |
| chr12 | 94378790  | 94435327  |
| chr12 | 95665809  | 95682822  |
| chr13 | 19835476  | 19837821  |
| chr13 | 32194142  | 32202527  |
| chr13 | 32326100  | 32357929  |
| chr13 | 35040932  | 35110978  |
| chr13 | 35048562  | 35098405  |
| chr13 | 36312144  | 36336358  |

|       |           |           |
|-------|-----------|-----------|
| chr13 | 37637483  | 37674367  |
| chr13 | 42926335  | 42964139  |
| chr13 | 42953947  | 42970670  |
| chr13 | 46356431  | 46372597  |
| chr13 | 46356431  | 46387879  |
| chr13 | 46368041  | 46378005  |
| chr13 | 46368041  | 46387879  |
| chr13 | 48511769  | 48524757  |
| chr13 | 49480218  | 49488630  |
| chr13 | 51771820  | 51791257  |
| chr13 | 52143915  | 52154173  |
| chr13 | 52627437  | 52629359  |
| chr13 | 52629218  | 52632494  |
| chr13 | 72731280  | 72743602  |
| chr13 | 91693186  | 91728665  |
| chr13 | 95863628  | 95867423  |
| chr14 | 102194937 | 102209862 |
| chr14 | 35008626  | 35023080  |
| chr14 | 37212229  | 37247907  |
| chr14 | 37212229  | 37270525  |
| chr14 | 37622049  | 37701526  |
| chr14 | 49709158  | 49723952  |
| chr14 | 49709158  | 49725769  |
| chr14 | 49732703  | 49743805  |
| chr14 | 51333392  | 51350372  |
| chr14 | 57274243  | 57280422  |
| chr14 | 57274243  | 57283230  |
| chr14 | 59324127  | 59326991  |
| chr14 | 60455000  | 60471739  |
| chr14 | 61443110  | 61453353  |
| chr14 | 64268794  | 64283075  |
| chr14 | 75622078  | 75641898  |
| chr14 | 75633628  | 75641898  |
| chr14 | 75965587  | 75971718  |
| chr14 | 80831142  | 80900029  |
| chr14 | 88391380  | 88416844  |
| chr14 | 88705481  | 88754671  |
| chr14 | 88839451  | 88857277  |
| chr14 | 88839451  | 88861332  |
| chr14 | 90890486  | 90923196  |
| chr14 | 91988283  | 92000108  |
| chr14 | 92007639  | 92011795  |
| chr14 | 96471477  | 96483219  |
| chr15 | 101701085 | 101723164 |
| chr15 | 20669467  | 20671268  |

|       |          |          |
|-------|----------|----------|
| chr15 | 22667897 | 22674586 |
| chr15 | 22667897 | 22678383 |
| chr15 | 32857014 | 32902040 |
| chr15 | 32908489 | 33008075 |
| chr15 | 34256228 | 34258944 |
| chr15 | 34256228 | 34261020 |
| chr15 | 36640604 | 36657905 |
| chr15 | 44672014 | 44672456 |
| chr15 | 48851187 | 48867869 |
| chr15 | 49568244 | 49590007 |
| chr15 | 49588015 | 49611268 |
| chr15 | 52223543 | 52229313 |
| chr15 | 52584744 | 52601165 |
| chr15 | 55327530 | 55341802 |
| chr15 | 56373440 | 56412436 |
| chr15 | 64915796 | 64922019 |
| chr15 | 67421334 | 67466711 |
| chr15 | 67825935 | 67833257 |
| chr15 | 70895848 | 70936822 |
| chr15 | 70919049 | 70984257 |
| chr15 | 70936760 | 70984257 |
| chr15 | 70980100 | 70984257 |
| chr15 | 89871474 | 89889140 |
| chr15 | 94356136 | 94402019 |
| chr15 | 94440175 | 94458246 |
| chr15 | 99799631 | 99801179 |
| chr16 | 16255719 | 16270828 |
| chr16 | 19616113 | 19647882 |
| chr16 | 21019623 | 21042203 |
| chr16 | 29320927 | 29328624 |
| chr16 | 30993129 | 30997059 |
| chr16 | 4571560  | 4580125  |
| chr16 | 4785806  | 4786105  |
| chr16 | 50716586 | 50729901 |
| chr16 | 57041484 | 57058148 |
| chr16 | 57041484 | 57059532 |
| chr16 | 61713840 | 61727215 |
| chr16 | 61789345 | 61825179 |
| chr16 | 67820838 | 67821225 |
| chr16 | 70646547 | 70657121 |
| chr16 | 70656601 | 70657121 |
| chr16 | 71894720 | 71921453 |
| chr16 | 71894720 | 71923380 |
| chr16 | 81017325 | 81026638 |
| chr16 | 83670789 | 83678461 |



|       |           |           |
|-------|-----------|-----------|
| chr16 | 88586599  | 88599948  |
| chr17 | 19780471  | 19781104  |
| chr17 | 29052919  | 29055888  |
| chr17 | 32653842  | 32654621  |
| chr17 | 3446471   | 3449149   |
| chr17 | 45987039  | 45996664  |
| chr17 | 49141246  | 49166254  |
| chr17 | 62573214  | 62574410  |
| chr17 | 65902151  | 66063081  |
| chr17 | 69100796  | 69125035  |
| chr17 | 77307140  | 77402703  |
| chr17 | 9608118   | 9612479   |
| chr18 | 14828277  | 14837676  |
| chr18 | 36501931  | 36709391  |
| chr18 | 42212363  | 42226107  |
| chr18 | 47052879  | 47059654  |
| chr18 | 54907785  | 54928882  |
| chr19 | 10782959  | 10805967  |
| chr19 | 10795371  | 10798572  |
| chr19 | 10795371  | 10812377  |
| chr19 | 1270927   | 1274440   |
| chr19 | 15170085  | 15170825  |
| chr19 | 19630470  | 19642619  |
| chr19 | 32731724  | 32742900  |
| chr19 | 32859840  | 32860650  |
| chr19 | 33137676  | 33144932  |
| chr19 | 37155864  | 37170054  |
| chr19 | 37156228  | 37170054  |
| chr19 | 37344609  | 37347872  |
| chr19 | 37520183  | 37533403  |
| chr19 | 37583970  | 37586745  |
| chr19 | 37758475  | 37773751  |
| chr19 | 38343579  | 38344368  |
| chr19 | 44336622  | 44343302  |
| chr19 | 49696481  | 49697465  |
| chr19 | 56511516  | 56516401  |
| chr19 | 56511516  | 56518577  |
| chr19 | 57232032  | 57235058  |
| chr19 | 5724807   | 5737205   |
| chr19 | 5724807   | 5739439   |
| chr1  | 100152384 | 100168594 |
| chr1  | 100156171 | 100168594 |
| chr1  | 108727807 | 108733532 |
| chr1  | 113856381 | 113859460 |
| chr1  | 148863249 | 148889894 |

|      |           |           |
|------|-----------|-----------|
| chr1 | 150747776 | 150757980 |
| chr1 | 152332582 | 152341210 |
| chr1 | 15308612  | 15313187  |
| chr1 | 154117724 | 154143577 |
| chr1 | 154331678 | 154331953 |
| chr1 | 167875130 | 167905198 |
| chr1 | 16929845  | 16940093  |
| chr1 | 170041676 | 170055436 |
| chr1 | 179368799 | 179370078 |
| chr1 | 185180390 | 185190642 |
| chr1 | 197539963 | 197583253 |
| chr1 | 197539963 | 197772932 |
| chr1 | 20879322  | 20895501  |
| chr1 | 20879322  | 20904971  |
| chr1 | 20886200  | 20899943  |
| chr1 | 20886200  | 20904971  |
| chr1 | 20892618  | 21050994  |
| chr1 | 20969473  | 21002808  |
| chr1 | 20969473  | 21050994  |
| chr1 | 20969473  | 21089213  |
| chr1 | 20969473  | 21111383  |
| chr1 | 20980333  | 21002808  |
| chr1 | 20980333  | 21050994  |
| chr1 | 20980333  | 21089213  |
| chr1 | 222538647 | 222542155 |
| chr1 | 222651976 | 222652332 |
| chr1 | 222990624 | 222992110 |
| chr1 | 223132474 | 223134864 |
| chr1 | 225152004 | 225168028 |
| chr1 | 225152004 | 225185425 |
| chr1 | 225152004 | 225240822 |
| chr1 | 225152004 | 225259253 |
| chr1 | 225304907 | 225324832 |
| chr1 | 228352950 | 228362755 |
| chr1 | 244477540 | 244499079 |
| chr1 | 35831426  | 35834174  |
| chr1 | 43197552  | 43199503  |
| chr1 | 53266472  | 53280715  |
| chr1 | 63419369  | 63429126  |
| chr1 | 63478763  | 63510181  |
| chr1 | 66862146  | 66905375  |
| chr1 | 7732447   | 7738482   |
| chr1 | 7820466   | 7827815   |
| chr1 | 7937689   | 7940933   |
| chr1 | 85816787  | 85849406  |

|       |           |           |
|-------|-----------|-----------|
| chr1  | 91394092  | 91396405  |
| chr1  | 95143890  | 95230994  |
| chr20 | 15933275  | 15987158  |
| chr20 | 15967552  | 15987158  |
| chr20 | 16356329  | 16381747  |
| chr20 | 23379866  | 23403072  |
| chr20 | 25634048  | 25674007  |
| chr20 | 35595476  | 35595754  |
| chr20 | 43528656  | 43540815  |
| chr20 | 43534827  | 43536458  |
| chr20 | 50611180  | 50630856  |
| chr20 | 51788860  | 51792352  |
| chr20 | 58691723  | 58701158  |
| chr21 | 28163601  | 28225991  |
| chr21 | 33856735  | 33867331  |
| chr22 | 17497402  | 17500735  |
| chr22 | 26774155  | 26778585  |
| chr22 | 38605253  | 38623279  |
| chr22 | 38665545  | 38668132  |
| chr22 | 43755765  | 43773103  |
| chr22 | 50406688  | 50441026  |
| chr2  | 110143541 | 110161697 |
| chr2  | 112074911 | 112089718 |
| chr2  | 112074911 | 112107840 |
| chr2  | 112081056 | 112107840 |
| chr2  | 11455341  | 11457233  |
| chr2  | 151548307 | 151553502 |
| chr2  | 151841902 | 151860820 |
| chr2  | 159714556 | 159729175 |
| chr2  | 159714556 | 159743253 |
| chr2  | 164692220 | 164705105 |
| chr2  | 189689526 | 189696369 |
| chr2  | 189752848 | 189754064 |
| chr2  | 190900563 | 190954818 |
| chr2  | 190927305 | 190954818 |
| chr2  | 196047351 | 196051249 |
| chr2  | 196646340 | 196658860 |
| chr2  | 196656632 | 196701180 |
| chr2  | 196666718 | 196732152 |
| chr2  | 196676142 | 196695159 |
| chr2  | 196890827 | 196898369 |
| chr2  | 196890827 | 196902742 |
| chr2  | 197000418 | 197005910 |
| chr2  | 200412310 | 200440784 |
| chr2  | 201307518 | 201309250 |

|      |           |           |
|------|-----------|-----------|
| chr2 | 201565728 | 201582217 |
| chr2 | 201565728 | 201604697 |
| chr2 | 201854873 | 201880167 |
| chr2 | 201854873 | 201890927 |
| chr2 | 202785917 | 202796964 |
| chr2 | 202785917 | 202811789 |
| chr2 | 202917876 | 202941980 |
| chr2 | 202917876 | 202961426 |
| chr2 | 202952558 | 202961426 |
| chr2 | 202977268 | 202982441 |
| chr2 | 203110149 | 203136774 |
| chr2 | 203122253 | 203136774 |
| chr2 | 203133057 | 203138748 |
| chr2 | 205763673 | 205766803 |
| chr2 | 219461881 | 219469379 |
| chr2 | 222887829 | 222909150 |
| chr2 | 222887829 | 222919202 |
| chr2 | 233540661 | 233557019 |
| chr2 | 237717761 | 237727935 |
| chr2 | 238332823 | 238344598 |
| chr2 | 241094276 | 241097427 |
| chr2 | 32087491  | 32089605  |
| chr2 | 33257283  | 33280158  |
| chr2 | 33257442  | 33280158  |
| chr2 | 33280038  | 33309556  |
| chr2 | 39056701  | 39067753  |
| chr2 | 54891053  | 54916935  |
| chr2 | 55206269  | 55209831  |
| chr2 | 60760133  | 60775123  |
| chr2 | 62858405  | 62874532  |
| chr2 | 67399168  | 67399626  |
| chr2 | 75687826  | 75706651  |
| chr2 | 84604338  | 84611854  |
| chr2 | 85847860  | 85863485  |
| chr2 | 97167576  | 97209872  |
| chr2 | 97200452  | 97219246  |
| chr2 | 97578905  | 97580568  |
| chr2 | 99064938  | 99081397  |
| chr3 | 101361714 | 101417790 |
| chr3 | 101364833 | 101366769 |
| chr3 | 101458954 | 101501119 |
| chr3 | 113249721 | 113250833 |
| chr3 | 113904139 | 113915838 |
| chr3 | 12742453  | 12748792  |
| chr3 | 132446474 | 132447939 |

|      |           |           |
|------|-----------|-----------|
| chr3 | 132446474 | 132456832 |
| chr3 | 132733323 | 132828006 |
| chr3 | 149140003 | 149163949 |
| chr3 | 149141016 | 149153648 |
| chr3 | 150423048 | 150438354 |
| chr3 | 150669295 | 150698882 |
| chr3 | 151394655 | 151416422 |
| chr3 | 151411277 | 151416422 |
| chr3 | 168024525 | 168032852 |
| chr3 | 169107925 | 169131531 |
| chr3 | 17042873  | 17068065  |
| chr3 | 171123595 | 171167270 |
| chr3 | 179198749 | 179230376 |
| chr3 | 183276871 | 183295477 |
| chr3 | 185428496 | 185466963 |
| chr3 | 187243483 | 187250329 |
| chr3 | 19342586  | 19347965  |
| chr3 | 197075836 | 197091026 |
| chr3 | 197075836 | 197119530 |
| chr3 | 197119409 | 197194589 |
| chr3 | 198063717 | 198077288 |
| chr3 | 198076795 | 198077288 |
| chr3 | 27256295  | 27322261  |
| chr3 | 27291261  | 27352919  |
| chr3 | 37094791  | 37149038  |
| chr3 | 37503177  | 37542585  |
| chr3 | 42757065  | 42758351  |
| chr3 | 45833049  | 45838051  |
| chr3 | 52327881  | 52386345  |
| chr3 | 52394464  | 52395678  |
| chr3 | 55950424  | 56007321  |
| chr3 | 57501320  | 57504204  |
| chr3 | 58390581  | 58412963  |
| chr3 | 69937821  | 69951886  |
| chr3 | 93995873  | 94039988  |
| chr3 | 94035330  | 94043240  |
| chr4 | 112637643 | 112644488 |
| chr4 | 119245336 | 119273708 |
| chr4 | 119538959 | 119607297 |
| chr4 | 128082164 | 128179512 |
| chr4 | 145642362 | 145646156 |
| chr4 | 168302299 | 168311365 |
| chr4 | 169463242 | 169479534 |
| chr4 | 169555719 | 169602678 |
| chr4 | 1893729   | 1904378   |

|      |           |           |
|------|-----------|-----------|
| chr4 | 1893729   | 1935262   |
| chr4 | 2072967   | 2229243   |
| chr4 | 2128112   | 2229243   |
| chr4 | 2170678   | 2213126   |
| chr4 | 2179307   | 2229243   |
| chr4 | 2984512   | 3029409   |
| chr4 | 40097226  | 40113508  |
| chr4 | 40131800  | 40152903  |
| chr4 | 42503449  | 42543986  |
| chr4 | 47568836  | 47576973  |
| chr4 | 48163701  | 48176186  |
| chr4 | 48831226  | 48833481  |
| chr4 | 5565257   | 5584850   |
| chr4 | 55999301  | 55999645  |
| chr4 | 6078938   | 6085629   |
| chr4 | 6923372   | 7001251   |
| chr4 | 6923372   | 7014557   |
| chr4 | 6967303   | 7001251   |
| chr4 | 6967303   | 7004924   |
| chr4 | 70632650  | 70637843  |
| chr4 | 80869992  | 80944939  |
| chr4 | 82904735  | 82907935  |
| chr4 | 83416730  | 83421736  |
| chr4 | 83416730  | 83432267  |
| chr4 | 84631818  | 84635351  |
| chr4 | 84633856  | 84640990  |
| chr4 | 88107183  | 88140014  |
| chr4 | 88383220  | 88417579  |
| chr4 | 88404875  | 88405613  |
| chr4 | 88649839  | 88658491  |
| chr4 | 88652011  | 88676423  |
| chr4 | 88662430  | 88687299  |
| chr4 | 94584985  | 94640450  |
| chr5 | 110605108 | 110627880 |
| chr5 | 110605108 | 110642371 |
| chr5 | 110638197 | 110642371 |
| chr5 | 112194567 | 112234755 |
| chr5 | 112204374 | 112209982 |
| chr5 | 112204374 | 112239737 |
| chr5 | 112209891 | 112266330 |
| chr5 | 113340518 | 113385212 |
| chr5 | 118510887 | 118522846 |
| chr5 | 134302589 | 134350427 |
| chr5 | 137634036 | 137639977 |
| chr5 | 13817547  | 13841904  |

|      |           |           |
|------|-----------|-----------|
| chr5 | 150942217 | 150943872 |
| chr5 | 159332781 | 159354121 |
| chr5 | 171293882 | 171296014 |
| chr5 | 180136377 | 180138058 |
| chr5 | 32774707  | 32784883  |
| chr5 | 34020586  | 34035758  |
| chr5 | 34023908  | 34035758  |
| chr5 | 34686871  | 34688248  |
| chr5 | 35691036  | 35709121  |
| chr5 | 42514079  | 42565944  |
| chr5 | 5303267   | 5306728   |
| chr5 | 5303267   | 5318281   |
| chr5 | 55441850  | 55475450  |
| chr5 | 58993371  | 59038971  |
| chr5 | 69355648  | 69366595  |
| chr5 | 73554321  | 73561288  |
| chr5 | 77311993  | 77331459  |
| chr5 | 79277909  | 79306461  |
| chr5 | 79300152  | 79306461  |
| chr5 | 82280959  | 82304850  |
| chr5 | 82280959  | 82305481  |
| chr6 | 104730302 | 104750472 |
| chr6 | 104824813 | 104843298 |
| chr6 | 104824813 | 104849246 |
| chr6 | 104824813 | 104852371 |
| chr6 | 10907541  | 10928450  |
| chr6 | 10935057  | 10958875  |
| chr6 | 109419186 | 109436199 |
| chr6 | 109426846 | 109431345 |
| chr6 | 10955115  | 10963843  |
| chr6 | 109641517 | 109662663 |
| chr6 | 109644613 | 109662663 |
| chr6 | 116877795 | 116895207 |
| chr6 | 118470536 | 118483858 |
| chr6 | 119002898 | 119020159 |
| chr6 | 119188404 | 119201347 |
| chr6 | 121160009 | 121294660 |
| chr6 | 121170404 | 121242339 |
| chr6 | 12129758  | 12135892  |
| chr6 | 125786136 | 125815404 |
| chr6 | 131851141 | 131869489 |
| chr6 | 131882344 | 131886724 |
| chr6 | 138812837 | 138846677 |
| chr6 | 152233780 | 152249262 |
| chr6 | 158661268 | 158665613 |

|      |           |           |
|------|-----------|-----------|
| chr6 | 169582835 | 169636504 |
| chr6 | 29621100  | 29631599  |
| chr6 | 31656471  | 31657723  |
| chr6 | 3410187   | 3432338   |
| chr6 | 41108304  | 41123249  |
| chr6 | 41117297  | 41118184  |
| chr6 | 41117297  | 41123249  |
| chr6 | 44360445  | 44370113  |
| chr6 | 56735227  | 56900621  |
| chr6 | 71429938  | 71435356  |
| chr6 | 83145523  | 83152367  |
| chr6 | 83147235  | 83156103  |
| chr6 | 84160811  | 84163270  |
| chr6 | 84444386  | 84474929  |
| chr6 | 87409834  | 87428824  |
| chr6 | 89265612  | 89268096  |
| chr7 | 100591666 | 100594541 |
| chr7 | 122436359 | 122441575 |
| chr7 | 123496695 | 123503363 |
| chr7 | 151116792 | 151123886 |
| chr7 | 154946359 | 154948090 |
| chr7 | 156642976 | 156644757 |
| chr7 | 18829160  | 18874596  |
| chr7 | 2700233   | 2709816   |
| chr7 | 30872242  | 30882993  |
| chr7 | 35117747  | 35132369  |
| chr7 | 36335045  | 36336297  |
| chr7 | 40237634  | 40316855  |
| chr7 | 44624316  | 44666851  |
| chr7 | 44645326  | 44666851  |
| chr7 | 47792626  | 47821186  |
| chr7 | 5623179   | 5624055   |
| chr7 | 64336258  | 64336982  |
| chr7 | 64814917  | 64820323  |
| chr7 | 6521428   | 6521957   |
| chr7 | 65964322  | 65976202  |
| chr7 | 65970281  | 65976202  |
| chr7 | 65974294  | 65976202  |
| chr7 | 65974294  | 65980409  |
| chr7 | 76005258  | 76030524  |
| chr7 | 77330238  | 77404615  |
| chr7 | 77349350  | 77355647  |
| chr7 | 77349350  | 77382643  |
| chr7 | 78343777  | 78369213  |
| chr7 | 87359205  | 87361852  |



|      |           |           |
|------|-----------|-----------|
| chr7 | 90288233  | 90304820  |
| chr7 | 93348710  | 93353761  |
| chr8 | 100165813 | 100177941 |
| chr8 | 103404775 | 103413531 |
| chr8 | 103885297 | 103916537 |
| chr8 | 103910133 | 103961133 |
| chr8 | 124503839 | 124523002 |
| chr8 | 124555741 | 124557875 |
| chr8 | 132727797 | 132757294 |
| chr8 | 17713213  | 17755961  |
| chr8 | 27322401  | 27325681  |
| chr8 | 37473077  | 37476012  |
| chr8 | 61576771  | 61653660  |
| chr8 | 61618977  | 61638363  |
| chr8 | 61618977  | 61644632  |
| chr8 | 61618977  | 61646878  |
| chr8 | 61618977  | 61653660  |
| chr8 | 61618977  | 61681036  |
| chr8 | 61618977  | 61684188  |
| chr8 | 66874052  | 66883994  |
| chr8 | 75543810  | 75559037  |
| chr8 | 98222478  | 98254087  |
| chr8 | 98236154  | 98254087  |
| chr9 | 104858521 | 104889195 |
| chr9 | 109258176 | 109268433 |
| chr9 | 113423325 | 113428963 |
| chr9 | 120989045 | 120997774 |
| chr9 | 121146107 | 121160302 |
| chr9 | 128485364 | 128494668 |
| chr9 | 137505613 | 137506083 |
| chr9 | 15744272  | 15784694  |
| chr9 | 2028986   | 2123937   |
| chr9 | 2028986   | 2161903   |
| chr9 | 2028986   | 2186228   |
| chr9 | 2039465   | 2058464   |
| chr9 | 32987543  | 32989895  |
| chr9 | 33503826  | 33510711  |
| chr9 | 36087693  | 36102230  |
| chr9 | 37881517  | 37899950  |
| chr9 | 62866966  | 62869304  |
| chr9 | 68378198  | 68392473  |
| chr9 | 70305246  | 70324143  |
| chr9 | 72223119  | 72231181  |
| chr9 | 83880296  | 83908652  |
| chr9 | 97246095  | 97251557  |

|      |           |           |
|------|-----------|-----------|
| chrX | 107526581 | 107533550 |
| chrX | 111192126 | 111196640 |
| chrX | 111708026 | 111736879 |
| chrX | 111708964 | 111736879 |
| chrX | 111711674 | 111728305 |
| chrX | 118566573 | 118630490 |
| chrX | 118605237 | 118630490 |
| chrX | 139585065 | 139588438 |
| chrX | 14895307  | 14911413  |
| chrX | 14900574  | 14914599  |
| chrX | 17006220  | 17029623  |
| chrX | 17052381  | 17062532  |
| chrX | 22038468  | 22090497  |
| chrX | 22090428  | 22133624  |
| chrX | 22219035  | 22227611  |
| chrX | 38273385  | 38276772  |
| chrX | 47982948  | 47983411  |
| chrX | 77616612  | 77664778  |
| chrX | 78014661  | 78033821  |
| chrX | 84116228  | 84135210  |

**Intergenic (1826)**

|       |           |           |
|-------|-----------|-----------|
| chr10 | 112888734 | 112906213 |
| chr10 | 112890965 | 112906213 |
| chr10 | 112905976 | 112906213 |
| chr10 | 12269937  | 12270626  |
| chr10 | 124750213 | 124750730 |
| chr10 | 130208053 | 130252065 |
| chr10 | 133491221 | 133498005 |
| chr10 | 133493286 | 133498005 |
| chr10 | 15186725  | 15189954  |
| chr10 | 17744966  | 17746329  |
| chr10 | 21316071  | 21321131  |
| chr10 | 21697452  | 21698891  |
| chr10 | 22448724  | 22448989  |
| chr10 | 258744    | 263658    |
| chr10 | 263203    | 263658    |
| chr10 | 26968934  | 26982813  |
| chr10 | 27542752  | 27578713  |
| chr10 | 27566831  | 27569933  |
| chr10 | 27566831  | 27578713  |
| chr10 | 27578370  | 27578713  |
| chr10 | 27629308  | 27635429  |
| chr10 | 31959434  | 31963390  |
| chr10 | 32653008  | 32653655  |
| chr10 | 32985384  | 33092437  |

|       |           |           |
|-------|-----------|-----------|
| chr10 | 33164525  | 33170630  |
| chr10 | 34251601  | 34302429  |
| chr10 | 34306571  | 34306996  |
| chr10 | 34993185  | 34993395  |
| chr10 | 35135928  | 35136591  |
| chr10 | 35296455  | 35321112  |
| chr10 | 35320855  | 35321670  |
| chr10 | 37729820  | 37745548  |
| chr10 | 37729820  | 37749733  |
| chr10 | 37729820  | 37749758  |
| chr10 | 37735131  | 37739714  |
| chr10 | 37738517  | 37744286  |
| chr10 | 37739714  | 37742449  |
| chr10 | 37742745  | 37746074  |
| chr10 | 37744214  | 37749758  |
| chr10 | 37747195  | 37749758  |
| chr10 | 37775343  | 37776570  |
| chr10 | 46003933  | 46004526  |
| chr10 | 47501279  | 47501514  |
| chr10 | 55893682  | 55895668  |
| chr10 | 57790427  | 57853636  |
| chr10 | 57991695  | 58005413  |
| chr10 | 57991695  | 58015971  |
| chr10 | 58005316  | 58023651  |
| chr10 | 6157523   | 6157996   |
| chr10 | 65824049  | 65861593  |
| chr10 | 719956    | 720644    |
| chr10 | 72561792  | 72562235  |
| chr10 | 72987962  | 72988368  |
| chr10 | 73739926  | 73740266  |
| chr10 | 73776943  | 73778857  |
| chr10 | 75461385  | 75461842  |
| chr10 | 75547030  | 75547662  |
| chr10 | 77787669  | 77789362  |
| chr10 | 88016242  | 88069642  |
| chr10 | 89017650  | 89035982  |
| chr10 | 89076695  | 89138518  |
| chr10 | 89083245  | 89085393  |
| chr10 | 89792838  | 89794672  |
| chr10 | 99857938  | 99859574  |
| chr11 | 102269129 | 102274835 |
| chr11 | 107177045 | 107180386 |
| chr11 | 107308282 | 107311232 |
| chr11 | 107309795 | 107310583 |
| chr11 | 108109931 | 108110620 |

|       |           |           |
|-------|-----------|-----------|
| chr11 | 12222663  | 12226334  |
| chr11 | 122291846 | 122301423 |
| chr11 | 122486787 | 122487301 |
| chr11 | 125530343 | 125530815 |
| chr11 | 125692887 | 125693581 |
| chr11 | 126179187 | 126180907 |
| chr11 | 126181494 | 126183087 |
| chr11 | 126182836 | 126183087 |
| chr11 | 126364530 | 126381942 |
| chr11 | 129266866 | 129267361 |
| chr11 | 129266866 | 129269715 |
| chr11 | 17020472  | 17023656  |
| chr11 | 17225495  | 17226199  |
| chr11 | 18592715  | 18593459  |
| chr11 | 23730310  | 23731658  |
| chr11 | 28535827  | 28564328  |
| chr11 | 28562227  | 28623996  |
| chr11 | 28702686  | 28741908  |
| chr11 | 28741824  | 28811623  |
| chr11 | 28846789  | 28922625  |
| chr11 | 29037741  | 29044660  |
| chr11 | 29037741  | 29044740  |
| chr11 | 29037741  | 29063536  |
| chr11 | 29037741  | 29211765  |
| chr11 | 29044444  | 29063536  |
| chr11 | 29097063  | 29106561  |
| chr11 | 29160191  | 29211765  |
| chr11 | 29211654  | 29282610  |
| chr11 | 29230935  | 29384112  |
| chr11 | 29282461  | 29285063  |
| chr11 | 29282461  | 29384112  |
| chr11 | 29381072  | 29384112  |
| chr11 | 29381090  | 29384112  |
| chr11 | 29383255  | 29384112  |
| chr11 | 2941491   | 2942888   |
| chr11 | 29455710  | 29518362  |
| chr11 | 29475513  | 29481582  |
| chr11 | 29476144  | 29484062  |
| chr11 | 29476144  | 29487481  |
| chr11 | 29586604  | 29596851  |
| chr11 | 34147542  | 34149553  |
| chr11 | 3701460   | 3704812   |
| chr11 | 46709152  | 46709456  |
| chr11 | 46740479  | 46740780  |
| chr11 | 47536527  | 47537526  |

|       |           |           |
|-------|-----------|-----------|
| chr11 | 527208    | 527626    |
| chr11 | 59547654  | 59548685  |
| chr11 | 61374864  | 61375417  |
| chr11 | 61467889  | 61468714  |
| chr11 | 62768351  | 62768619  |
| chr11 | 62872506  | 62873008  |
| chr11 | 645591    | 646016    |
| chr11 | 645595    | 646021    |
| chr11 | 65326387  | 65326786  |
| chr11 | 65824522  | 65826609  |
| chr11 | 65826275  | 65826609  |
| chr11 | 65900777  | 65901089  |
| chr11 | 66956079  | 66956338  |
| chr11 | 67861939  | 67873341  |
| chr11 | 67873205  | 67873549  |
| chr11 | 67873205  | 67874489  |
| chr11 | 6893000   | 6898228   |
| chr11 | 69316833  | 69341678  |
| chr11 | 69371402  | 69373513  |
| chr11 | 73929003  | 73929775  |
| chr11 | 74731729  | 74732126  |
| chr11 | 76820299  | 76843732  |
| chr11 | 77529947  | 77560875  |
| chr11 | 813246    | 814265    |
| chr11 | 83075431  | 83076555  |
| chr11 | 83081534  | 83081800  |
| chr11 | 85771443  | 85773593  |
| chr11 | 8669671   | 8670034   |
| chr11 | 88399681  | 88400072  |
| chr11 | 9102401   | 9122894   |
| chr12 | 100177042 | 100180716 |
| chr12 | 102205023 | 102269646 |
| chr12 | 102257214 | 102282298 |
| chr12 | 102257214 | 102315490 |
| chr12 | 102257214 | 102324877 |
| chr12 | 102267186 | 102275759 |
| chr12 | 102269599 | 102315490 |
| chr12 | 102277673 | 102315490 |
| chr12 | 102279546 | 102282298 |
| chr12 | 102281265 | 102293277 |
| chr12 | 104381785 | 104387984 |
| chr12 | 104381785 | 104430659 |
| chr12 | 104940287 | 104940699 |
| chr12 | 106051276 | 106059414 |
| chr12 | 106899056 | 106902878 |

|       |           |           |
|-------|-----------|-----------|
| chr12 | 108433129 | 108443314 |
| chr12 | 108832488 | 108832639 |
| chr12 | 117982089 | 117991833 |
| chr12 | 118116509 | 118117882 |
| chr12 | 121868096 | 121868614 |
| chr12 | 125027560 | 125027801 |
| chr12 | 12832701  | 12839222  |
| chr12 | 12833045  | 12839204  |
| chr12 | 12839073  | 12846599  |
| chr12 | 12846334  | 12846599  |
| chr12 | 12855170  | 12859577  |
| chr12 | 12855170  | 12870651  |
| chr12 | 133014823 | 133015061 |
| chr12 | 133028818 | 133028992 |
| chr12 | 14734569  | 14769009  |
| chr12 | 16736241  | 16749876  |
| chr12 | 19280792  | 19281492  |
| chr12 | 19552852  | 19553392  |
| chr12 | 19552852  | 19590799  |
| chr12 | 19595996  | 19603313  |
| chr12 | 27034386  | 27034782  |
| chr12 | 27046157  | 27066226  |
| chr12 | 27144991  | 27148604  |
| chr12 | 28204092  | 28226199  |
| chr12 | 31278181  | 31279153  |
| chr12 | 38432081  | 38591924  |
| chr12 | 42172139  | 42210680  |
| chr12 | 42210354  | 42210680  |
| chr12 | 42210354  | 42212484  |
| chr12 | 4567954   | 4581004   |
| chr12 | 46272901  | 46275375  |
| chr12 | 49534542  | 49537096  |
| chr12 | 49775578  | 49776114  |
| chr12 | 5159273   | 5171889   |
| chr12 | 5160306   | 5171889   |
| chr12 | 5160306   | 5198646   |
| chr12 | 5169153   | 5171889   |
| chr12 | 52266545  | 52269822  |
| chr12 | 5270204   | 5276889   |
| chr12 | 53530897  | 53531153  |
| chr12 | 5358269   | 5367934   |
| chr12 | 5358269   | 5371598   |
| chr12 | 5388513   | 5405456   |
| chr12 | 56728537  | 56728719  |
| chr12 | 56980073  | 56988634  |

|       |          |          |
|-------|----------|----------|
| chr12 | 57019166 | 57019467 |
| chr12 | 57395748 | 57398198 |
| chr12 | 57395748 | 57398202 |
| chr12 | 57398781 | 57399150 |
| chr12 | 6393795  | 6394999  |
| chr12 | 66796540 | 66892938 |
| chr12 | 66891404 | 66892371 |
| chr12 | 66891900 | 66907142 |
| chr12 | 66891900 | 66907196 |
| chr12 | 66891900 | 66938347 |
| chr12 | 66891900 | 66992939 |
| chr12 | 66925636 | 66925967 |
| chr12 | 67318683 | 67329041 |
| chr12 | 67318683 | 67349398 |
| chr12 | 67419260 | 67421287 |
| chr12 | 7042960  | 7044036  |
| chr12 | 73329105 | 73363397 |
| chr12 | 73363072 | 73364301 |
| chr12 | 73459368 | 73477374 |
| chr12 | 76717906 | 76730079 |
| chr12 | 79570785 | 79571396 |
| chr12 | 79715550 | 79720342 |
| chr12 | 85342471 | 85355059 |
| chr12 | 85342471 | 85424204 |
| chr12 | 85353204 | 85424204 |
| chr12 | 85399492 | 85424204 |
| chr12 | 85414065 | 85424204 |
| chr12 | 85594466 | 85702968 |
| chr12 | 85685057 | 85713416 |
| chr12 | 87377107 | 87415076 |
| chr12 | 87527757 | 87528707 |
| chr12 | 87548774 | 87651983 |
| chr12 | 87648516 | 87651983 |
| chr12 | 87648516 | 87653185 |
| chr12 | 87648516 | 87659196 |
| chr12 | 87648516 | 87684654 |
| chr12 | 87648516 | 87715112 |
| chr12 | 87648520 | 87715092 |
| chr12 | 87659114 | 87690206 |
| chr12 | 87684493 | 87707705 |
| chr12 | 87690236 | 87707705 |
| chr12 | 87707646 | 87715112 |
| chr12 | 87707646 | 87721292 |
| chr12 | 87707646 | 87727823 |
| chr12 | 87721171 | 87727823 |

|       |           |           |
|-------|-----------|-----------|
| chr12 | 93977664  | 93977875  |
| chr12 | 979969    | 980403    |
| chr12 | 98539135  | 98539517  |
| chr12 | 98548946  | 98549335  |
| chr13 | 112633024 | 112641755 |
| chr13 | 24517746  | 24518043  |
| chr13 | 28628543  | 28636986  |
| chr13 | 28690341  | 28690687  |
| chr13 | 28839777  | 28893763  |
| chr13 | 28890974  | 28893821  |
| chr13 | 28890974  | 28894197  |
| chr13 | 28936696  | 28948737  |
| chr13 | 29153906  | 29154159  |
| chr13 | 29158104  | 29164725  |
| chr13 | 29222511  | 29224162  |
| chr13 | 29372732  | 29379127  |
| chr13 | 29403330  | 29403810  |
| chr13 | 41299502  | 41303695  |
| chr13 | 46324552  | 46325246  |
| chr13 | 49976332  | 49978189  |
| chr13 | 50425577  | 50505684  |
| chr13 | 80217804  | 80264374  |
| chr13 | 87687854  | 87715494  |
| chr13 | 99071509  | 99072508  |
| chr14 | 102051420 | 102051739 |
| chr14 | 102743477 | 102743710 |
| chr14 | 102752743 | 102753028 |
| chr14 | 103356914 | 103357310 |
| chr14 | 103360364 | 103360885 |
| chr14 | 21163022  | 21163290  |
| chr14 | 22695988  | 22717220  |
| chr14 | 24170833  | 24171379  |
| chr14 | 24196994  | 24200642  |
| chr14 | 26093845  | 26145822  |
| chr14 | 26724747  | 26735372  |
| chr14 | 26729558  | 26731156  |
| chr14 | 27311022  | 27322141  |
| chr14 | 27999519  | 28006399  |
| chr14 | 28072153  | 28072568  |
| chr14 | 29502918  | 29556457  |
| chr14 | 34551713  | 34554912  |
| chr14 | 34647791  | 34648139  |
| chr14 | 34647791  | 34648300  |
| chr14 | 34751310  | 34751468  |
| chr14 | 34962228  | 34962438  |



|       |           |           |
|-------|-----------|-----------|
| chr14 | 34969169  | 34972064  |
| chr14 | 39470317  | 39497592  |
| chr14 | 39655503  | 39655808  |
| chr14 | 39761663  | 39763587  |
| chr14 | 40216281  | 40264929  |
| chr14 | 45260629  | 45261944  |
| chr14 | 45516585  | 45605277  |
| chr14 | 53510724  | 53516145  |
| chr14 | 53510724  | 53516374  |
| chr14 | 55354500  | 55355222  |
| chr14 | 57548573  | 57550572  |
| chr14 | 59389542  | 59461173  |
| chr14 | 64336507  | 64338070  |
| chr14 | 64353952  | 64357503  |
| chr14 | 71400793  | 71418196  |
| chr14 | 71413947  | 71418196  |
| chr14 | 71413947  | 71421869  |
| chr14 | 71413947  | 71467247  |
| chr14 | 72582011  | 72582159  |
| chr14 | 83646543  | 83666209  |
| chr15 | 100855230 | 100860035 |
| chr15 | 101162295 | 101175622 |
| chr15 | 22976427  | 22976961  |
| chr15 | 24998325  | 25000606  |
| chr15 | 24998969  | 25020761  |
| chr15 | 25019026  | 25020761  |
| chr15 | 25019026  | 25022964  |
| chr15 | 25019026  | 25024630  |
| chr15 | 25019026  | 25028668  |
| chr15 | 25067408  | 25070259  |
| chr15 | 25067411  | 25070259  |
| chr15 | 30798203  | 30798460  |
| chr15 | 34488962  | 34490796  |
| chr15 | 39860819  | 39862419  |
| chr15 | 39913968  | 39914423  |
| chr15 | 40395170  | 40395686  |
| chr15 | 40541597  | 40552237  |
| chr15 | 40962612  | 40964740  |
| chr15 | 41308182  | 41308817  |
| chr15 | 48680668  | 48717169  |
| chr15 | 48717017  | 48724029  |
| chr15 | 48717017  | 48729540  |
| chr15 | 49106200  | 49121829  |
| chr15 | 50706387  | 50707157  |
| chr15 | 56054841  | 56057637  |

|       |          |          |
|-------|----------|----------|
| chr15 | 56483702 | 56497073 |
| chr15 | 56827523 | 56865889 |
| chr15 | 56847323 | 56848600 |
| chr15 | 56847323 | 56850186 |
| chr15 | 60964363 | 61016035 |
| chr15 | 61014451 | 61016035 |
| chr15 | 61015797 | 61016035 |
| chr15 | 61015797 | 61034926 |
| chr15 | 61015797 | 61035277 |
| chr15 | 61015797 | 61041134 |
| chr15 | 61015797 | 61047560 |
| chr15 | 61015797 | 61072325 |
| chr15 | 61015797 | 61094611 |
| chr15 | 61015797 | 61112119 |
| chr15 | 61015797 | 61221110 |
| chr15 | 61094355 | 61104228 |
| chr15 | 61094355 | 61112119 |
| chr15 | 61220726 | 61223307 |
| chr15 | 62428902 | 62429322 |
| chr15 | 62579504 | 62589762 |
| chr15 | 62589686 | 62618475 |
| chr15 | 63141000 | 63141533 |
| chr15 | 65149782 | 65150169 |
| chr15 | 69462011 | 69462315 |
| chr15 | 72605060 | 72609197 |
| chr15 | 72608759 | 72612326 |
| chr15 | 74483854 | 74484215 |
| chr15 | 74489588 | 74491582 |
| chr15 | 75933741 | 75934479 |
| chr15 | 79356752 | 79383106 |
| chr15 | 79411399 | 79413557 |
| chr15 | 80959151 | 80970659 |
| chr15 | 82627164 | 82640865 |
| chr15 | 82640656 | 82641682 |
| chr15 | 82958974 | 82959308 |
| chr15 | 87406362 | 87422036 |
| chr15 | 89656386 | 89656979 |
| chr15 | 94602337 | 94628223 |
| chr15 | 96342880 | 96361289 |
| chr15 | 99808146 | 99877148 |
| chr16 | 11515928 | 11522112 |
| chr16 | 11933516 | 11937668 |
| chr16 | 11970175 | 11970424 |
| chr16 | 11973082 | 11973677 |
| chr16 | 11974324 | 11976159 |

|       |          |          |
|-------|----------|----------|
| chr16 | 13048271 | 13065154 |
| chr16 | 13060050 | 13060527 |
| chr16 | 13060267 | 13063698 |
| chr16 | 13242389 | 13244460 |
| chr16 | 13471569 | 13474341 |
| chr16 | 15653966 | 15654368 |
| chr16 | 15973971 | 15974814 |
| chr16 | 1886804  | 1889295  |
| chr16 | 19703041 | 19704172 |
| chr16 | 22170832 | 22172331 |
| chr16 | 22412979 | 22416463 |
| chr16 | 23453613 | 23454205 |
| chr16 | 29597457 | 29597880 |
| chr16 | 30035350 | 30046387 |
| chr16 | 30059405 | 30059657 |
| chr16 | 30800204 | 30802470 |
| chr16 | 30830693 | 30831067 |
| chr16 | 34265957 | 34266371 |
| chr16 | 3640714  | 3643036  |
| chr16 | 436216   | 436576   |
| chr16 | 57209599 | 57210431 |
| chr16 | 66598177 | 66598840 |
| chr16 | 67102412 | 67102635 |
| chr16 | 67504731 | 67505766 |
| chr16 | 69734290 | 69734540 |
| chr16 | 69737328 | 69738098 |
| chr16 | 70226769 | 70233525 |
| chr16 | 70226769 | 70246610 |
| chr16 | 71810145 | 71810338 |
| chr16 | 72713332 | 72747182 |
| chr16 | 742249   | 742543   |
| chr16 | 74613179 | 74614099 |
| chr16 | 78994239 | 78996356 |
| chr16 | 81312727 | 81313120 |
| chr16 | 85264477 | 85265058 |
| chr16 | 86527367 | 86528939 |
| chr16 | 8883209  | 8884465  |
| chr16 | 89266254 | 89267315 |
| chr16 | 9222684  | 9222832  |
| chr17 | 1045081  | 1045650  |
| chr17 | 10678037 | 10679055 |
| chr17 | 1258559  | 1259559  |
| chr17 | 13865078 | 13900211 |
| chr17 | 13892724 | 13898732 |
| chr17 | 13892724 | 13933185 |

|       |          |          |
|-------|----------|----------|
| chr17 | 14209508 | 14215937 |
| chr17 | 15265455 | 15267311 |
| chr17 | 15429466 | 15429636 |
| chr17 | 1671773  | 1672389  |
| chr17 | 18704618 | 18705164 |
| chr17 | 20056264 | 20057817 |
| chr17 | 30645358 | 30648456 |
| chr17 | 30771171 | 30771607 |
| chr17 | 30775868 | 30779018 |
| chr17 | 30776296 | 30780739 |
| chr17 | 31001737 | 31002113 |
| chr17 | 31021909 | 31024426 |
| chr17 | 31071911 | 31073677 |
| chr17 | 31327648 | 31358632 |
| chr17 | 32344539 | 32347388 |
| chr17 | 34966933 | 34967891 |
| chr17 | 35468136 | 35468822 |
| chr17 | 3705080  | 3705645  |
| chr17 | 3804532  | 3805018  |
| chr17 | 38319328 | 38319816 |
| chr17 | 39537817 | 39538644 |
| chr17 | 39556285 | 39564914 |
| chr17 | 39564759 | 39566892 |
| chr17 | 40119208 | 40119722 |
| chr17 | 43569432 | 43609933 |
| chr17 | 44457152 | 44457834 |
| chr17 | 44492223 | 44493162 |
| chr17 | 45538321 | 45538589 |
| chr17 | 46963696 | 46965039 |
| chr17 | 46963834 | 46965039 |
| chr17 | 46966533 | 46970309 |
| chr17 | 47054117 | 47072559 |
| chr17 | 516109   | 521993   |
| chr17 | 517939   | 518459   |
| chr17 | 55175858 | 55201712 |
| chr17 | 58713743 | 58714029 |
| chr17 | 62474354 | 62476831 |
| chr17 | 66906254 | 66906574 |
| chr17 | 68209653 | 68210465 |
| chr17 | 76097131 | 76097472 |
| chr17 | 76260836 | 76261264 |
| chr17 | 76689364 | 76689768 |
| chr17 | 77176197 | 77176681 |
| chr17 | 77293431 | 77293827 |
| chr17 | 77340222 | 77341697 |

|       |          |          |
|-------|----------|----------|
| chr17 | 80335153 | 80335647 |
| chr17 | 81883765 | 81884986 |
| chr17 | 8202952  | 8203621  |
| chr17 | 8203504  | 8203901  |
| chr17 | 82731375 | 82732875 |
| chr17 | 83167543 | 83169611 |
| chr17 | 8364134  | 8364805  |
| chr18 | 14335463 | 14335900 |
| chr18 | 14404798 | 14408096 |
| chr18 | 21636026 | 21636418 |
| chr18 | 35322387 | 35327063 |
| chr18 | 41351660 | 41437441 |
| chr18 | 55786585 | 55791898 |
| chr18 | 55788612 | 55814488 |
| chr18 | 55834162 | 55839660 |
| chr18 | 56050079 | 56050896 |
| chr18 | 56166569 | 56168315 |
| chr18 | 59392543 | 59392845 |
| chr18 | 61171847 | 61203186 |
| chr18 | 70526064 | 70531787 |
| chr19 | 11647323 | 11652053 |
| chr19 | 11648357 | 11650417 |
| chr19 | 11648357 | 11652053 |
| chr19 | 11648357 | 11654411 |
| chr19 | 11671295 | 11672193 |
| chr19 | 1190028  | 1190991  |
| chr19 | 12079094 | 12079397 |
| chr19 | 12089873 | 12090324 |
| chr19 | 12121605 | 12121804 |
| chr19 | 12230459 | 12234908 |
| chr19 | 12244580 | 12250368 |
| chr19 | 12249977 | 12250368 |
| chr19 | 12817008 | 12818442 |
| chr19 | 13837562 | 13838018 |
| chr19 | 15336491 | 15344366 |
| chr19 | 16237487 | 16238833 |
| chr19 | 16635806 | 16636479 |
| chr19 | 16640919 | 16641651 |
| chr19 | 16642326 | 16643064 |
| chr19 | 18952720 | 18952909 |
| chr19 | 19366690 | 19367546 |
| chr19 | 19383482 | 19383697 |
| chr19 | 19786608 | 19789821 |
| chr19 | 21062605 | 21077216 |
| chr19 | 265183   | 265972   |

|       |          |          |
|-------|----------|----------|
| chr19 | 27403133 | 27523546 |
| chr19 | 27472041 | 27500555 |
| chr19 | 27472041 | 27523546 |
| chr19 | 27472554 | 27494126 |
| chr19 | 27472554 | 27521041 |
| chr19 | 27493583 | 27494240 |
| chr19 | 27773121 | 27773463 |
| chr19 | 27918682 | 27919858 |
| chr19 | 29645261 | 29657943 |
| chr19 | 31123852 | 31126079 |
| chr19 | 31228004 | 31232280 |
| chr19 | 32339478 | 32339840 |
| chr19 | 32714249 | 32714692 |
| chr19 | 3568768  | 3569352  |
| chr19 | 36534860 | 36535380 |
| chr19 | 36678044 | 36680479 |
| chr19 | 37001330 | 37001683 |
| chr19 | 37246075 | 37246491 |
| chr19 | 37322232 | 37323521 |
| chr19 | 37729903 | 37730337 |
| chr19 | 38963518 | 38964574 |
| chr19 | 39820476 | 39821292 |
| chr19 | 4076774  | 4078125  |
| chr19 | 41369591 | 41370282 |
| chr19 | 4269309  | 4270435  |
| chr19 | 44181857 | 44196151 |
| chr19 | 44669354 | 44670212 |
| chr19 | 45187330 | 45187740 |
| chr19 | 46891726 | 46891999 |
| chr19 | 46895449 | 46895817 |
| chr19 | 48949827 | 48950325 |
| chr19 | 49052208 | 49052733 |
| chr19 | 49255217 | 49256275 |
| chr19 | 49331616 | 49332320 |
| chr19 | 49719456 | 49719935 |
| chr19 | 50795740 | 50797396 |
| chr19 | 52242756 | 52262743 |
| chr19 | 52244024 | 52250436 |
| chr19 | 52587790 | 52592228 |
| chr19 | 52588531 | 52592228 |
| chr19 | 52670433 | 52699238 |
| chr19 | 53423061 | 53427219 |
| chr19 | 53536089 | 53536617 |
| chr19 | 54398831 | 54407890 |
| chr19 | 55040478 | 55040855 |

|       |           |           |
|-------|-----------|-----------|
| chr19 | 56363234  | 56365057  |
| chr19 | 5670412   | 5672579   |
| chr19 | 57180711  | 57181259  |
| chr19 | 57784189  | 57784640  |
| chr19 | 57790273  | 57799458  |
| chr19 | 57790972  | 57791802  |
| chr19 | 57819567  | 57820549  |
| chr19 | 58265572  | 58265928  |
| chr19 | 58269675  | 58270548  |
| chr19 | 58462262  | 58462504  |
| chr19 | 58492736  | 58495666  |
| chr19 | 5911102   | 5912257   |
| chr19 | 7089065   | 7089451   |
| chr19 | 7095599   | 7095958   |
| chr19 | 7945435   | 7946046   |
| chr19 | 9292012   | 9292882   |
| chr19 | 9563960   | 9564252   |
| chr1  | 1008193   | 1009370   |
| chr1  | 10395888  | 10396330  |
| chr1  | 1063078   | 1066936   |
| chr1  | 109063981 | 109064239 |
| chr1  | 109210795 | 109211119 |
| chr1  | 110347572 | 110356031 |
| chr1  | 110351190 | 110356031 |
| chr1  | 111565307 | 111566042 |
| chr1  | 112858186 | 112858479 |
| chr1  | 112877729 | 112885053 |
| chr1  | 112996840 | 112999109 |
| chr1  | 112998929 | 113008360 |
| chr1  | 113127852 | 113129039 |
| chr1  | 113932623 | 113933609 |
| chr1  | 12015360  | 12017007  |
| chr1  | 120419849 | 120427847 |
| chr1  | 120489810 | 120493301 |
| chr1  | 120530295 | 120557127 |
| chr1  | 120533815 | 120535809 |
| chr1  | 120741807 | 120763709 |
| chr1  | 120741807 | 120793496 |
| chr1  | 120763627 | 120785233 |
| chr1  | 120811885 | 120816827 |
| chr1  | 13843031  | 13864675  |
| chr1  | 143635508 | 143635780 |
| chr1  | 145422795 | 145423431 |
| chr1  | 148657092 | 148657384 |
| chr1  | 149100740 | 149101384 |

|      |           |           |
|------|-----------|-----------|
| chr1 | 149557068 | 149557886 |
| chr1 | 149849296 | 149849530 |
| chr1 | 150620889 | 150621072 |
| chr1 | 151195658 | 151195989 |
| chr1 | 152226425 | 152227051 |
| chr1 | 152226425 | 152251758 |
| chr1 | 152248894 | 152251758 |
| chr1 | 155243867 | 155244335 |
| chr1 | 155243879 | 155244335 |
| chr1 | 155634769 | 155648534 |
| chr1 | 15792836  | 15796943  |
| chr1 | 160895644 | 160895878 |
| chr1 | 16164470  | 16168253  |
| chr1 | 16633094  | 16635168  |
| chr1 | 172797452 | 172835377 |
| chr1 | 172797452 | 172933640 |
| chr1 | 172797452 | 172933643 |
| chr1 | 172817213 | 172851482 |
| chr1 | 172817552 | 172851482 |
| chr1 | 172835250 | 172933643 |
| chr1 | 172886226 | 172933643 |
| chr1 | 172924570 | 172926734 |
| chr1 | 172924570 | 172933643 |
| chr1 | 172924598 | 172933643 |
| chr1 | 173073952 | 173154199 |
| chr1 | 173798499 | 173799294 |
| chr1 | 173859259 | 173859471 |
| chr1 | 173862639 | 173863183 |
| chr1 | 178123047 | 178125501 |
| chr1 | 178123055 | 178125501 |
| chr1 | 178123055 | 178134720 |
| chr1 | 178123055 | 178138808 |
| chr1 | 178123718 | 178134720 |
| chr1 | 180284746 | 180284905 |
| chr1 | 184093624 | 184100110 |
| chr1 | 185370667 | 185374556 |
| chr1 | 201516623 | 201516895 |
| chr1 | 201622852 | 201623606 |
| chr1 | 204558640 | 204579513 |
| chr1 | 204565209 | 204580409 |
| chr1 | 207815198 | 207817414 |
| chr1 | 207815928 | 207817414 |
| chr1 | 22154902  | 22155903  |
| chr1 | 22154902  | 22157202  |
| chr1 | 22172054  | 22188935  |



|      |           |           |
|------|-----------|-----------|
| chr1 | 222594235 | 222603276 |
| chr1 | 224496496 | 224515876 |
| chr1 | 224546828 | 224566264 |
| chr1 | 226140556 | 226140977 |
| chr1 | 226896974 | 226897829 |
| chr1 | 226897719 | 226908683 |
| chr1 | 226909701 | 226917660 |
| chr1 | 23240008  | 23249938  |
| chr1 | 23287363  | 23294197  |
| chr1 | 23733089  | 23733508  |
| chr1 | 241892721 | 241893150 |
| chr1 | 244772338 | 244772564 |
| chr1 | 246435944 | 246441299 |
| chr1 | 246435944 | 246445087 |
| chr1 | 246437147 | 246440124 |
| chr1 | 246437401 | 246481309 |
| chr1 | 247145051 | 247152902 |
| chr1 | 247199359 | 247200193 |
| chr1 | 247333134 | 247334426 |
| chr1 | 26261039  | 26261205  |
| chr1 | 27002850  | 27003938  |
| chr1 | 28243521  | 28246753  |
| chr1 | 28513150  | 28514090  |
| chr1 | 29126503  | 29129488  |
| chr1 | 31394555  | 31402685  |
| chr1 | 31920365  | 31920647  |
| chr1 | 32905661  | 32905868  |
| chr1 | 35117570  | 35117855  |
| chr1 | 40430371  | 40434103  |
| chr1 | 42480460  | 42498916  |
| chr1 | 42490157  | 42498916  |
| chr1 | 42728466  | 42729146  |
| chr1 | 44050949  | 44061227  |
| chr1 | 44773884  | 44774644  |
| chr1 | 45248573  | 45264498  |
| chr1 | 47368486  | 47373075  |
| chr1 | 51507535  | 51508771  |
| chr1 | 54420598  | 54433576  |
| chr1 | 58713055  | 58718748  |
| chr1 | 58713055  | 58723169  |
| chr1 | 58714831  | 58718748  |
| chr1 | 58715493  | 58718748  |
| chr1 | 60254477  | 60258687  |
| chr1 | 67398604  | 67405169  |
| chr1 | 68920816  | 68923584  |

|       |          |          |
|-------|----------|----------|
| chr1  | 72341546 | 72364283 |
| chr1  | 72363773 | 72410059 |
| chr1  | 72380057 | 72410059 |
| chr1  | 72391404 | 72410059 |
| chr1  | 72749165 | 72766687 |
| chr1  | 72749165 | 72874338 |
| chr1  | 72917102 | 72940591 |
| chr1  | 7703110  | 7703553  |
| chr1  | 78025017 | 78026688 |
| chr1  | 805798   | 810170   |
| chr1  | 84104855 | 84105388 |
| chr1  | 84903244 | 84916794 |
| chr1  | 93412091 | 93437654 |
| chr1  | 97974309 | 97975100 |
| chr1  | 98393054 | 98395390 |
| chr1  | 9991623  | 9996873  |
| chr20 | 11899588 | 11900436 |
| chr20 | 32860781 | 32867747 |
| chr20 | 32929527 | 32931336 |
| chr20 | 32930397 | 32931336 |
| chr20 | 33550640 | 33556738 |
| chr20 | 35216747 | 35218061 |
| chr20 | 37873078 | 37873498 |
| chr20 | 44305744 | 44306001 |
| chr20 | 44305788 | 44305973 |
| chr20 | 44305803 | 44305973 |
| chr20 | 44469176 | 44472247 |
| chr20 | 45451997 | 45456703 |
| chr20 | 45931068 | 45931482 |
| chr20 | 51349940 | 51368853 |
| chr20 | 51366448 | 51368853 |
| chr20 | 51900121 | 51913814 |
| chr20 | 51976048 | 51976472 |
| chr20 | 52043757 | 52045258 |
| chr20 | 5279399  | 5282311  |
| chr20 | 5727154  | 5728030  |
| chr20 | 61285736 | 61286114 |
| chr20 | 61963440 | 61964030 |
| chr20 | 62297323 | 62297672 |
| chr20 | 6355479  | 6356702  |
| chr20 | 63834767 | 63834973 |
| chr20 | 64151696 | 64157313 |
| chr20 | 8962195  | 8967355  |
| chr20 | 9096286  | 9110029  |
| chr21 | 10325780 | 10340478 |

|       |          |          |
|-------|----------|----------|
| chr21 | 14084350 | 14084549 |
| chr21 | 14094432 | 14094759 |
| chr21 | 14825522 | 14857708 |
| chr21 | 14853273 | 14857708 |
| chr21 | 14853273 | 14870273 |
| chr21 | 18760025 | 18814661 |
| chr21 | 21656938 | 21665196 |
| chr21 | 27354996 | 27398565 |
| chr21 | 28577218 | 28626676 |
| chr21 | 29384146 | 29423167 |
| chr21 | 29410254 | 29411624 |
| chr21 | 29411521 | 29423167 |
| chr21 | 29458241 | 29459812 |
| chr21 | 36016948 | 36018807 |
| chr21 | 37570169 | 37580835 |
| chr21 | 43882503 | 43887405 |
| chr21 | 45310455 | 45311429 |
| chr21 | 45668873 | 45673735 |
| chr21 | 45732674 | 45749475 |
| chr21 | 45749380 | 45755452 |
| chr21 | 45788297 | 45788870 |
| chr21 | 46570629 | 46571064 |
| chr22 | 16745350 | 16748600 |
| chr22 | 17957194 | 17958362 |
| chr22 | 22294840 | 22297745 |
| chr22 | 25370869 | 25371865 |
| chr22 | 25509182 | 25510862 |
| chr22 | 25509182 | 25510908 |
| chr22 | 28790719 | 28791819 |
| chr22 | 29320057 | 29321054 |
| chr22 | 29497680 | 29498520 |
| chr22 | 30650239 | 30651295 |
| chr22 | 30692230 | 30692752 |
| chr22 | 31109978 | 31112209 |
| chr22 | 31648100 | 31650778 |
| chr22 | 32265430 | 32268579 |
| chr22 | 32265430 | 32273507 |
| chr22 | 32268287 | 32273507 |
| chr22 | 35762776 | 35763331 |
| chr22 | 35982035 | 35992774 |
| chr22 | 35992675 | 35996030 |
| chr22 | 36002061 | 36002651 |
| chr22 | 37587762 | 37588446 |
| chr22 | 38286326 | 38286793 |
| chr22 | 39526662 | 39527175 |

|              |           |           |
|--------------|-----------|-----------|
| chr22        | 40886383  | 40933336  |
| chr22        | 40927396  | 40929273  |
| chr22        | 42149927  | 42153200  |
| chr22        | 42299996  | 42301247  |
| chr22        | 42307553  | 42307760  |
| chr22        | 44862987  | 44865175  |
| chr22        | 45189916  | 45190545  |
| chr22        | 45239461  | 45239774  |
| chr22        | 47860464  | 47862122  |
| chr22        | 47861991  | 47928944  |
| KI270733v1_r | 167967    | 168876    |
| chr2         | 10138415  | 10138822  |
| chr2         | 10272428  | 10272718  |
| chr2         | 111208487 | 111208936 |
| chr2         | 111233627 | 111239996 |
| chr2         | 111233627 | 111248241 |
| chr2         | 111239801 | 111248241 |
| chr2         | 111700409 | 111700812 |
| chr2         | 113673581 | 113674253 |
| chr2         | 117839974 | 117842201 |
| chr2         | 118142795 | 118278471 |
| chr2         | 119685657 | 119686874 |
| chr2         | 127431666 | 127436297 |
| chr2         | 127461486 | 127470385 |
| chr2         | 130066454 | 130067902 |
| chr2         | 131684708 | 131688303 |
| chr2         | 134171740 | 134190248 |
| chr2         | 138101132 | 138212897 |
| chr2         | 138290450 | 138306284 |
| chr2         | 138299460 | 138305527 |
| chr2         | 138348690 | 138367611 |
| chr2         | 146915212 | 146954229 |
| chr2         | 14986663  | 14998224  |
| chr2         | 151789751 | 151791908 |
| chr2         | 152830316 | 152859498 |
| chr2         | 155698966 | 155704210 |
| chr2         | 155759630 | 155814067 |
| chr2         | 155809927 | 155811890 |
| chr2         | 155809927 | 155811964 |
| chr2         | 155809927 | 155812794 |
| chr2         | 155906359 | 155914227 |
| chr2         | 173630587 | 173693837 |
| chr2         | 173657935 | 173693837 |
| chr2         | 173692683 | 173761730 |
| chr2         | 173739388 | 173743522 |

|      |           |           |
|------|-----------|-----------|
| chr2 | 173761578 | 173811253 |
| chr2 | 173800481 | 173806580 |
| chr2 | 182672080 | 182674518 |
| chr2 | 183178806 | 183182680 |
| chr2 | 183178806 | 183203227 |
| chr2 | 183182556 | 183188763 |
| chr2 | 183203058 | 183203227 |
| chr2 | 183242785 | 183334209 |
| chr2 | 183316754 | 183334209 |
| chr2 | 186215018 | 186249732 |
| chr2 | 186364725 | 186365129 |
| chr2 | 186416754 | 186456851 |
| chr2 | 187117035 | 187126675 |
| chr2 | 18719798  | 18919377  |
| chr2 | 190593188 | 190593723 |
| chr2 | 190606955 | 190628715 |
| chr2 | 19065980  | 19125387  |
| chr2 | 191613707 | 191636219 |
| chr2 | 191779218 | 191785489 |
| chr2 | 192019655 | 192048848 |
| chr2 | 199002705 | 199026655 |
| chr2 | 201743070 | 201743516 |
| chr2 | 202879986 | 202880329 |
| chr2 | 206121759 | 206122352 |
| chr2 | 206121759 | 206122357 |
| chr2 | 206841106 | 206879440 |
| chr2 | 206841106 | 206881891 |
| chr2 | 206866696 | 206879440 |
| chr2 | 206866696 | 206881891 |
| chr2 | 207148981 | 207149200 |
| chr2 | 207416060 | 207417117 |
| chr2 | 219714256 | 219794170 |
| chr2 | 219787564 | 219794170 |
| chr2 | 219792376 | 219794170 |
| chr2 | 219792376 | 219803218 |
| chr2 | 219792376 | 219840845 |
| chr2 | 219917762 | 219940777 |
| chr2 | 220021475 | 220024789 |
| chr2 | 220102311 | 220137863 |
| chr2 | 220630378 | 220634128 |
| chr2 | 223506277 | 223514236 |
| chr2 | 224709887 | 224717763 |
| chr2 | 229755717 | 229755925 |
| chr2 | 231504134 | 231507255 |
| chr2 | 236264772 | 236268343 |

|      |           |           |
|------|-----------|-----------|
| chr2 | 237022685 | 237023199 |
| chr2 | 240686437 | 240688825 |
| chr2 | 241687940 | 241690653 |
| chr2 | 24510968  | 24564430  |
| chr2 | 24554388  | 24556055  |
| chr2 | 24554388  | 24564430  |
| chr2 | 24556014  | 24564430  |
| chr2 | 24562705  | 24564430  |
| chr2 | 24563903  | 24564430  |
| chr2 | 25271005  | 25273056  |
| chr2 | 25709302  | 25722165  |
| chr2 | 25717335  | 25722165  |
| chr2 | 26147143  | 26147326  |
| chr2 | 30859572  | 30867375  |
| chr2 | 31662857  | 31710268  |
| chr2 | 32825389  | 32826130  |
| chr2 | 33612653  | 33616692  |
| chr2 | 3481534   | 3484771   |
| chr2 | 37101922  | 37104132  |
| chr2 | 38782704  | 38782963  |
| chr2 | 46527940  | 46541453  |
| chr2 | 46535812  | 46537576  |
| chr2 | 53603390  | 53606080  |
| chr2 | 53603390  | 53606776  |
| chr2 | 54050957  | 54057360  |
| chr2 | 54466952  | 54469986  |
| chr2 | 54667090  | 54667447  |
| chr2 | 55759195  | 55772912  |
| chr2 | 63571374  | 63571626  |
| chr2 | 63650658  | 63813707  |
| chr2 | 70641336  | 70648030  |
| chr2 | 74470991  | 74471298  |
| chr2 | 74471001  | 74471298  |
| chr2 | 74701769  | 74711243  |
| chr2 | 75346612  | 75354979  |
| chr2 | 78411079  | 78413176  |
| chr2 | 86142340  | 86143695  |
| chr2 | 87704332  | 87716790  |
| chr2 | 94196054  | 94203287  |
| chr2 | 95832385  | 95834565  |
| chr2 | 95832478  | 95835422  |
| chr2 | 95832599  | 95834977  |
| chr2 | 95832805  | 95833829  |
| chr2 | 95832805  | 95834565  |
| chr2 | 95833435  | 95833750  |

|      |           |           |
|------|-----------|-----------|
| chr2 | 95833435  | 95834172  |
| chr2 | 95833616  | 95834565  |
| chr2 | 95833905  | 95834224  |
| chr2 | 95833932  | 95834148  |
| chr2 | 95833932  | 95834565  |
| chr2 | 95834069  | 95834898  |
| chr2 | 95834350  | 95835127  |
| chr2 | 95834358  | 95834565  |
| chr2 | 95834358  | 95835113  |
| chr2 | 95834358  | 95835127  |
| chr2 | 95834969  | 95835319  |
| chr2 | 95834977  | 95835127  |
| chr2 | 95834977  | 95835643  |
| chr2 | 97265915  | 97268415  |
| chr2 | 97266224  | 97268003  |
| chr2 | 97267377  | 97267900  |
| chr2 | 97267654  | 97267971  |
| chr2 | 97490434  | 97491145  |
| chr2 | 97490456  | 97491153  |
| chr3 | 100002937 | 100025558 |
| chr3 | 100023273 | 100025558 |
| chr3 | 104520555 | 104556044 |
| chr3 | 104522668 | 104556044 |
| chr3 | 104630284 | 104630579 |
| chr3 | 104630288 | 104630579 |
| chr3 | 104764378 | 104817613 |
| chr3 | 104764378 | 104855451 |
| chr3 | 104817472 | 104818695 |
| chr3 | 104817472 | 104829713 |
| chr3 | 104817472 | 104842744 |
| chr3 | 104817472 | 104855451 |
| chr3 | 104817472 | 104859959 |
| chr3 | 106741560 | 106750905 |
| chr3 | 106741560 | 106771161 |
| chr3 | 106741560 | 106860748 |
| chr3 | 110447146 | 110502152 |
| chr3 | 11137517  | 11137804  |
| chr3 | 113702116 | 113702863 |
| chr3 | 115334016 | 115370176 |
| chr3 | 115547207 | 115547488 |
| chr3 | 125901432 | 125902054 |
| chr3 | 129965700 | 129972108 |
| chr3 | 129965700 | 129973298 |
| chr3 | 136331500 | 136331826 |
| chr3 | 137013938 | 137017166 |

|      |           |           |
|------|-----------|-----------|
| chr3 | 138041072 | 138041482 |
| chr3 | 139180289 | 139188610 |
| chr3 | 142099681 | 142100454 |
| chr3 | 144175682 | 144177055 |
| chr3 | 144237757 | 144239267 |
| chr3 | 144237757 | 144270349 |
| chr3 | 144237757 | 144304804 |
| chr3 | 145650517 | 145770312 |
| chr3 | 145905807 | 146034688 |
| chr3 | 145983607 | 145990927 |
| chr3 | 145983607 | 145999967 |
| chr3 | 145983607 | 146034688 |
| chr3 | 145996235 | 146021522 |
| chr3 | 146021432 | 146035473 |
| chr3 | 146034531 | 146035473 |
| chr3 | 149724079 | 149725135 |
| chr3 | 150388470 | 150392667 |
| chr3 | 153172835 | 153173746 |
| chr3 | 153172835 | 153178789 |
| chr3 | 155822066 | 155822327 |
| chr3 | 155941307 | 155942177 |
| chr3 | 158740388 | 158742481 |
| chr3 | 158740388 | 158760383 |
| chr3 | 158760157 | 158769482 |
| chr3 | 15961765  | 15965796  |
| chr3 | 161284716 | 161285241 |
| chr3 | 161284716 | 161297701 |
| chr3 | 169599485 | 169600053 |
| chr3 | 170966935 | 170995025 |
| chr3 | 170981932 | 170995025 |
| chr3 | 174523412 | 174553757 |
| chr3 | 178906401 | 178909706 |
| chr3 | 178908521 | 178909706 |
| chr3 | 178909598 | 179004184 |
| chr3 | 184703405 | 184709731 |
| chr3 | 185501901 | 185502509 |
| chr3 | 188903796 | 188913462 |
| chr3 | 189099952 | 189100204 |
| chr3 | 189127056 | 189132697 |
| chr3 | 189127056 | 189147647 |
| chr3 | 189132398 | 189147647 |
| chr3 | 194041371 | 194042073 |
| chr3 | 194494049 | 194499043 |
| chr3 | 195897236 | 195897424 |
| chr3 | 195899562 | 195905431 |



|      |           |           |
|------|-----------|-----------|
| chr3 | 195901415 | 195901805 |
| chr3 | 195949241 | 195951037 |
| chr3 | 196019879 | 196027260 |
| chr3 | 196213105 | 196213911 |
| chr3 | 196234243 | 196236776 |
| chr3 | 196352539 | 196352733 |
| chr3 | 197884861 | 197885357 |
| chr3 | 197884867 | 197885322 |
| chr3 | 24030726  | 24088061  |
| chr3 | 27367058  | 27368099  |
| chr3 | 27477943  | 27478257  |
| chr3 | 31639987  | 31647091  |
| chr3 | 37378201  | 37380440  |
| chr3 | 42086498  | 42087400  |
| chr3 | 42087103  | 42087400  |
| chr3 | 42087103  | 42089932  |
| chr3 | 44496470  | 44496763  |
| chr3 | 44496947  | 44497510  |
| chr3 | 45088447  | 45091881  |
| chr3 | 48286245  | 48286930  |
| chr3 | 48338109  | 48339212  |
| chr3 | 48749712  | 48750170  |
| chr3 | 53219987  | 53220547  |
| chr3 | 56839843  | 56841523  |
| chr3 | 56906758  | 56907091  |
| chr3 | 67035116  | 67058596  |
| chr3 | 67041864  | 67042057  |
| chr3 | 67092518  | 67096603  |
| chr3 | 67094831  | 67096603  |
| chr3 | 67237400  | 67241819  |
| chr3 | 67268452  | 67268994  |
| chr3 | 72708843  | 72716617  |
| chr3 | 81288078  | 81325698  |
| chr3 | 8658924   | 8659801   |
| chr3 | 8840195   | 8841539   |
| chr3 | 8840195   | 8852948   |
| chr3 | 8852878   | 8854774   |
| chr3 | 99122563  | 99128056  |
| chr3 | 99967340  | 100025558 |
| chr4 | 103328124 | 103343235 |
| chr4 | 103328124 | 103377175 |
| chr4 | 103467291 | 103552602 |
| chr4 | 103536345 | 103552602 |
| chr4 | 103536345 | 103569402 |
| chr4 | 103547853 | 103552602 |

|      |           |           |
|------|-----------|-----------|
| chr4 | 103548742 | 103569402 |
| chr4 | 10373786  | 10375292  |
| chr4 | 110418220 | 110419105 |
| chr4 | 110418240 | 110419105 |
| chr4 | 110464974 | 110465858 |
| chr4 | 114173379 | 114181726 |
| chr4 | 1184266   | 1184627   |
| chr4 | 119412351 | 119420155 |
| chr4 | 119434739 | 119444433 |
| chr4 | 120618642 | 120619403 |
| chr4 | 1265339   | 1265907   |
| chr4 | 1265339   | 1270295   |
| chr4 | 127836257 | 127837054 |
| chr4 | 128037203 | 128037435 |
| chr4 | 128291799 | 128303035 |
| chr4 | 128291799 | 128371745 |
| chr4 | 128292933 | 128400298 |
| chr4 | 129512441 | 129542703 |
| chr4 | 129524104 | 129542703 |
| chr4 | 129542572 | 129543727 |
| chr4 | 13179195  | 13181146  |
| chr4 | 13336892  | 13342312  |
| chr4 | 13336892  | 13361633  |
| chr4 | 139102050 | 139168042 |
| chr4 | 139116648 | 139139497 |
| chr4 | 139391882 | 139393722 |
| chr4 | 139393590 | 139404490 |
| chr4 | 139403848 | 139404168 |
| chr4 | 139403848 | 139404343 |
| chr4 | 139403848 | 139404490 |
| chr4 | 141994573 | 141995619 |
| chr4 | 143808313 | 143866076 |
| chr4 | 143859020 | 143866076 |
| chr4 | 148477372 | 148544584 |
| chr4 | 151105475 | 151105738 |
| chr4 | 151295513 | 151296481 |
| chr4 | 151352899 | 151353391 |
| chr4 | 156324094 | 156334361 |
| chr4 | 159186641 | 159203232 |
| chr4 | 159186641 | 159210583 |
| chr4 | 159186641 | 159241368 |
| chr4 | 159238808 | 159241368 |
| chr4 | 168492665 | 168537786 |
| chr4 | 173145210 | 173165132 |
| chr4 | 173696609 | 173856466 |

|      |           |           |
|------|-----------|-----------|
| chr4 | 173833922 | 173878280 |
| chr4 | 176443896 | 176450824 |
| chr4 | 183810105 | 183829990 |
| chr4 | 183828177 | 183829990 |
| chr4 | 187704963 | 187711957 |
| chr4 | 189855885 | 189864786 |
| chr4 | 189855885 | 189895643 |
| chr4 | 189855885 | 189937333 |
| chr4 | 189895531 | 189937333 |
| chr4 | 22341019  | 22364337  |
| chr4 | 23078613  | 23083788  |
| chr4 | 23105501  | 23122436  |
| chr4 | 23105501  | 23199724  |
| chr4 | 23105501  | 23221222  |
| chr4 | 23120319  | 23122436  |
| chr4 | 23120319  | 23186098  |
| chr4 | 23297260  | 23298605  |
| chr4 | 23592788  | 23634627  |
| chr4 | 2561205   | 2596329   |
| chr4 | 2581036   | 2581348   |
| chr4 | 2596083   | 2596329   |
| chr4 | 26764302  | 26764737  |
| chr4 | 34979647  | 35005121  |
| chr4 | 34979647  | 35014118  |
| chr4 | 34980486  | 35005121  |
| chr4 | 34996297  | 35005121  |
| chr4 | 34996297  | 35020067  |
| chr4 | 36457605  | 36584796  |
| chr4 | 36498426  | 36584796  |
| chr4 | 36582656  | 36584796  |
| chr4 | 378072    | 378363    |
| chr4 | 378100    | 378319    |
| chr4 | 4073032   | 4087393   |
| chr4 | 4085120   | 4087393   |
| chr4 | 4086657   | 4087339   |
| chr4 | 4086657   | 4087393   |
| chr4 | 4086657   | 4088409   |
| chr4 | 41406138  | 41462597  |
| chr4 | 41422005  | 41422269  |
| chr4 | 41462421  | 41473195  |
| chr4 | 53853884  | 53897869  |
| chr4 | 53853884  | 53944997  |
| chr4 | 6314982   | 6316181   |
| chr4 | 66025498  | 66085941  |
| chr4 | 67728539  | 67730209  |

|      |           |           |
|------|-----------|-----------|
| chr4 | 67795747  | 67802411  |
| chr4 | 67798638  | 67802419  |
| chr4 | 68038898  | 68039608  |
| chr4 | 72934073  | 72948239  |
| chr4 | 73234360  | 73235080  |
| chr4 | 73250566  | 73250788  |
| chr4 | 73343954  | 73353573  |
| chr4 | 75448466  | 75455855  |
| chr4 | 80295558  | 80301716  |
| chr4 | 844256    | 846876    |
| chr4 | 845079    | 845385    |
| chr4 | 84653407  | 84659039  |
| chr4 | 9565858   | 9567271   |
| chr4 | 9637640   | 9638489   |
| chr4 | 9641070   | 9641431   |
| chr4 | 9687543   | 9688030   |
| chr5 | 10213490  | 10224061  |
| chr5 | 1031595   | 1038722   |
| chr5 | 10315971  | 10322598  |
| chr5 | 1037854   | 1038024   |
| chr5 | 104196313 | 104197092 |
| chr5 | 104405310 | 104440133 |
| chr5 | 104697858 | 104707721 |
| chr5 | 108718740 | 108723972 |
| chr5 | 116298246 | 116303683 |
| chr5 | 116298246 | 116318300 |
| chr5 | 116303529 | 116318300 |
| chr5 | 116317516 | 116318300 |
| chr5 | 116366385 | 116366904 |
| chr5 | 123618017 | 123653221 |
| chr5 | 127956803 | 127966928 |
| chr5 | 12852739  | 12867888  |
| chr5 | 131395562 | 131408207 |
| chr5 | 131395562 | 131423631 |
| chr5 | 131401480 | 131401776 |
| chr5 | 131415070 | 131417177 |
| chr5 | 131415070 | 131417615 |
| chr5 | 131415070 | 131423631 |
| chr5 | 132869215 | 132869717 |
| chr5 | 137757866 | 137759020 |
| chr5 | 141217689 | 141222023 |
| chr5 | 142529994 | 142531132 |
| chr5 | 145310575 | 145381718 |
| chr5 | 145431457 | 145440159 |
| chr5 | 145431457 | 145441072 |

|      |           |           |
|------|-----------|-----------|
| chr5 | 145431457 | 145489738 |
| chr5 | 145438071 | 145440159 |
| chr5 | 145438071 | 145473315 |
| chr5 | 145439990 | 145489738 |
| chr5 | 145439990 | 145490324 |
| chr5 | 145473199 | 145671554 |
| chr5 | 145586380 | 145671554 |
| chr5 | 145587324 | 145591128 |
| chr5 | 145587324 | 145670827 |
| chr5 | 145587324 | 145704295 |
| chr5 | 145665253 | 145704295 |
| chr5 | 145703974 | 145704295 |
| chr5 | 148662606 | 148677235 |
| chr5 | 150493474 | 150493800 |
| chr5 | 150494087 | 150494858 |
| chr5 | 150581883 | 150592358 |
| chr5 | 151924933 | 151947795 |
| chr5 | 151927173 | 151947795 |
| chr5 | 151946638 | 151947795 |
| chr5 | 151946638 | 151951036 |
| chr5 | 171845505 | 171847749 |
| chr5 | 172776482 | 172777671 |
| chr5 | 177951716 | 177957662 |
| chr5 | 178091088 | 178093389 |
| chr5 | 178885613 | 178887787 |
| chr5 | 179538973 | 179540832 |
| chr5 | 179669084 | 179669391 |
| chr5 | 179677042 | 179677858 |
| chr5 | 179932940 | 179934259 |
| chr5 | 181097606 | 181100673 |
| chr5 | 181099848 | 181100673 |
| chr5 | 25177590  | 25180826  |
| chr5 | 25180728  | 25191033  |
| chr5 | 25542353  | 25542790  |
| chr5 | 25567671  | 25576170  |
| chr5 | 25647011  | 25674652  |
| chr5 | 27276140  | 27281091  |
| chr5 | 33023074  | 33027826  |
| chr5 | 34157534  | 34182867  |
| chr5 | 34163117  | 34182867  |
| chr5 | 34169026  | 34182867  |
| chr5 | 34175444  | 34179097  |
| chr5 | 34175444  | 34182867  |
| chr5 | 34175821  | 34182867  |
| chr5 | 34179012  | 34182867  |

|      |           |           |
|------|-----------|-----------|
| chr5 | 34182679  | 34182867  |
| chr5 | 37287979  | 37288845  |
| chr5 | 43110830  | 43111091  |
| chr5 | 4481691   | 4530076   |
| chr5 | 4489481   | 4525809   |
| chr5 | 53783966  | 53785144  |
| chr5 | 66085446  | 66093732  |
| chr5 | 66191155  | 66203030  |
| chr5 | 66202824  | 66204326  |
| chr5 | 66202824  | 66208992  |
| chr5 | 6761219   | 6764872   |
| chr5 | 6775558   | 6777509   |
| chr5 | 6775558   | 6791981   |
| chr5 | 70042366  | 70044143  |
| chr5 | 73358843  | 73406818  |
| chr5 | 73406444  | 73406818  |
| chr5 | 7924232   | 7928686   |
| chr5 | 79347816  | 79349750  |
| chr5 | 83817769  | 83818893  |
| chr5 | 85805306  | 85821466  |
| chr5 | 85821331  | 85827796  |
| chr5 | 85863807  | 85907736  |
| chr5 | 85872428  | 85888067  |
| chr5 | 90455714  | 90455985  |
| chr5 | 93107575  | 93112679  |
| chr5 | 97220955  | 97229457  |
| chr5 | 97427235  | 97439618  |
| chr5 | 98419359  | 98433380  |
| chr5 | 98809501  | 98841931  |
| chr6 | 104648142 | 104688287 |
| chr6 | 10537030  | 10537425  |
| chr6 | 106175468 | 106175882 |
| chr6 | 107027015 | 107027429 |
| chr6 | 108202402 | 108202595 |
| chr6 | 110915033 | 110915493 |
| chr6 | 111269448 | 111270581 |
| chr6 | 111654023 | 111655556 |
| chr6 | 112880591 | 112937686 |
| chr6 | 112900344 | 112937686 |
| chr6 | 112912876 | 112921171 |
| chr6 | 116633185 | 116634497 |
| chr6 | 117662905 | 117664862 |
| chr6 | 120978891 | 121010355 |
| chr6 | 120978891 | 121016795 |
| chr6 | 121004169 | 121016795 |

|      |           |           |
|------|-----------|-----------|
| chr6 | 125395038 | 125444235 |
| chr6 | 126111218 | 126174911 |
| chr6 | 126111218 | 126177335 |
| chr6 | 126111218 | 126204432 |
| chr6 | 126112865 | 126115855 |
| chr6 | 126112865 | 126174911 |
| chr6 | 126174824 | 126177335 |
| chr6 | 126521536 | 126571600 |
| chr6 | 126522079 | 126637735 |
| chr6 | 129535931 | 129540542 |
| chr6 | 129556551 | 129558166 |
| chr6 | 134875094 | 134879469 |
| chr6 | 13783422  | 13784613  |
| chr6 | 13783429  | 13784613  |
| chr6 | 138645754 | 138675044 |
| chr6 | 140651477 | 140664253 |
| chr6 | 140651477 | 140664610 |
| chr6 | 140804234 | 140816254 |
| chr6 | 140804234 | 140840786 |
| chr6 | 141581999 | 141656558 |
| chr6 | 141704581 | 141705067 |
| chr6 | 141704581 | 141708290 |
| chr6 | 141752379 | 141910011 |
| chr6 | 141772872 | 141850160 |
| chr6 | 141772872 | 141910011 |
| chr6 | 141798082 | 141910011 |
| chr6 | 141824165 | 141900410 |
| chr6 | 141826594 | 141831645 |
| chr6 | 141827440 | 141910011 |
| chr6 | 141829735 | 141910011 |
| chr6 | 141900322 | 141910011 |
| chr6 | 141900322 | 141927052 |
| chr6 | 141900322 | 141927055 |
| chr6 | 141900322 | 141981627 |
| chr6 | 141900322 | 142006118 |
| chr6 | 150978152 | 150978936 |
| chr6 | 151246353 | 151268693 |
| chr6 | 151361485 | 151363195 |
| chr6 | 151362022 | 151363195 |
| chr6 | 151639052 | 151656763 |
| chr6 | 154858319 | 154860998 |
| chr6 | 154860737 | 154860998 |
| chr6 | 154860737 | 154863898 |
| chr6 | 154890687 | 154941705 |
| chr6 | 154944115 | 154961377 |

|      |           |           |
|------|-----------|-----------|
| chr6 | 1558958   | 1562413   |
| chr6 | 158245179 | 158245997 |
| chr6 | 158262644 | 158282378 |
| chr6 | 158975110 | 158975944 |
| chr6 | 159594102 | 159595204 |
| chr6 | 159679915 | 159680682 |
| chr6 | 166972738 | 166980839 |
| chr6 | 23016724  | 23049941  |
| chr6 | 26317123  | 26317476  |
| chr6 | 27535500  | 27539873  |
| chr6 | 29927383  | 29928546  |
| chr6 | 30723619  | 30723775  |
| chr6 | 30723658  | 30724414  |
| chr6 | 31204641  | 31205364  |
| chr6 | 31536592  | 31539016  |
| chr6 | 31645533  | 31646479  |
| chr6 | 32978168  | 32979950  |
| chr6 | 34274244  | 34275306  |
| chr6 | 35257316  | 35258068  |
| chr6 | 36111568  | 36116421  |
| chr6 | 36158647  | 36158941  |
| chr6 | 36158647  | 36160784  |
| chr6 | 36158647  | 36172969  |
| chr6 | 36158647  | 36196170  |
| chr6 | 37801615  | 37804140  |
| chr6 | 3971257   | 4011600   |
| chr6 | 4011505   | 4018879   |
| chr6 | 41933549  | 41933881  |
| chr6 | 42812951  | 42813607  |
| chr6 | 42941509  | 42943970  |
| chr6 | 49234530  | 49245714  |
| chr6 | 49244965  | 49245740  |
| chr6 | 49244965  | 49250609  |
| chr6 | 49316602  | 49331897  |
| chr6 | 57326579  | 57327046  |
| chr6 | 57481876  | 57488778  |
| chr6 | 70589007  | 70589260  |
| chr6 | 73209955  | 73213760  |
| chr6 | 73272683  | 73272953  |
| chr6 | 73871929  | 73872831  |
| chr6 | 75593818  | 75600328  |
| chr6 | 77088445  | 77151974  |
| chr6 | 77151096  | 77228352  |
| chr6 | 77151200  | 77151974  |
| chr6 | 77151200  | 77212053  |



|      |           |           |
|------|-----------|-----------|
| chr6 | 77151200  | 77214751  |
| chr6 | 77211980  | 77273307  |
| chr6 | 77243120  | 77273307  |
| chr6 | 77259666  | 77273307  |
| chr6 | 77260161  | 77273307  |
| chr6 | 77271339  | 77273307  |
| chr6 | 77271339  | 77291700  |
| chr6 | 77271339  | 77316704  |
| chr6 | 80350090  | 80353897  |
| chr6 | 80564421  | 80665949  |
| chr6 | 81491490  | 81495113  |
| chr6 | 82057938  | 82059679  |
| chr6 | 83730887  | 83769008  |
| chr6 | 83982528  | 84024983  |
| chr6 | 84556018  | 84567813  |
| chr6 | 84556018  | 84602487  |
| chr6 | 85837956  | 85840301  |
| chr6 | 85945691  | 85950092  |
| chr6 | 88581610  | 88582036  |
| chr6 | 90486986  | 90498237  |
| chr6 | 90489838  | 90498237  |
| chr7 | 100140171 | 100140439 |
| chr7 | 100695753 | 100696073 |
| chr7 | 100832135 | 100832826 |
| chr7 | 101300768 | 101301049 |
| chr7 | 104973523 | 104978489 |
| chr7 | 105007939 | 105008580 |
| chr7 | 105908407 | 105910572 |
| chr7 | 105911016 | 105912638 |
| chr7 | 106605178 | 106610463 |
| chr7 | 116482812 | 116484046 |
| chr7 | 116655580 | 116664041 |
| chr7 | 116940363 | 116947790 |
| chr7 | 12751406  | 12758316  |
| chr7 | 128533644 | 128580094 |
| chr7 | 128539731 | 128540021 |
| chr7 | 128562314 | 128592017 |
| chr7 | 128574719 | 128580094 |
| chr7 | 128577952 | 128580094 |
| chr7 | 128577952 | 128639156 |
| chr7 | 128579998 | 128592017 |
| chr7 | 128579998 | 128609579 |
| chr7 | 128579998 | 128615970 |
| chr7 | 128591849 | 128609579 |
| chr7 | 128591849 | 128615970 |

|      |           |           |
|------|-----------|-----------|
| chr7 | 128591849 | 128617977 |
| chr7 | 128625796 | 128626530 |
| chr7 | 128629393 | 128631869 |
| chr7 | 128629393 | 128638897 |
| chr7 | 128631679 | 128638897 |
| chr7 | 129258580 | 129338536 |
| chr7 | 130866492 | 130868472 |
| chr7 | 134100187 | 134101166 |
| chr7 | 140295984 | 140297523 |
| chr7 | 149256869 | 149257247 |
| chr7 | 151740424 | 151772530 |
| chr7 | 156986371 | 156986609 |
| chr7 | 157391091 | 157391847 |
| chr7 | 157425779 | 157430952 |
| chr7 | 1686701   | 1688150   |
| chr7 | 1687915   | 1688150   |
| chr7 | 17135407  | 17150206  |
| chr7 | 17256397  | 17286516  |
| chr7 | 17718053  | 17723952  |
| chr7 | 18975301  | 18976468  |
| chr7 | 19020901  | 19056165  |
| chr7 | 19055252  | 19056165  |
| chr7 | 19055252  | 19060484  |
| chr7 | 22889358  | 22891109  |
| chr7 | 2324042   | 2324400   |
| chr7 | 2346100   | 2346487   |
| chr7 | 2347284   | 2347874   |
| chr7 | 2721272   | 2722138   |
| chr7 | 32099293  | 32111181  |
| chr7 | 32722722  | 32726470  |
| chr7 | 32751393  | 32753956  |
| chr7 | 32812756  | 32817307  |
| chr7 | 32812756  | 32823221  |
| chr7 | 32812756  | 32838666  |
| chr7 | 32833007  | 32834919  |
| chr7 | 32833007  | 32838613  |
| chr7 | 32833007  | 32838666  |
| chr7 | 33635176  | 33642918  |
| chr7 | 363647    | 364005    |
| chr7 | 38010920  | 38013581  |
| chr7 | 45797477  | 45805289  |
| chr7 | 4644598   | 4644873   |
| chr7 | 4644685   | 4675325   |
| chr7 | 4797055   | 4797677   |
| chr7 | 5006429   | 5006885   |

|      |          |          |
|------|----------|----------|
| chr7 | 5434778  | 5438651  |
| chr7 | 5615950  | 5620039  |
| chr7 | 6081104  | 6085262  |
| chr7 | 64722547 | 64734625 |
| chr7 | 64937341 | 64937630 |
| chr7 | 65088804 | 65098832 |
| chr7 | 65091879 | 65098832 |
| chr7 | 65313569 | 65317566 |
| chr7 | 65313569 | 65338616 |
| chr7 | 65336192 | 65336394 |
| chr7 | 65347826 | 65350103 |
| chr7 | 65403175 | 65403644 |
| chr7 | 65799602 | 65802070 |
| chr7 | 65827161 | 65846059 |
| chr7 | 66155767 | 66156065 |
| chr7 | 66156214 | 66156391 |
| chr7 | 66156620 | 66156879 |
| chr7 | 6634970  | 6636235  |
| chr7 | 66400922 | 66402545 |
| chr7 | 66405568 | 66491239 |
| chr7 | 66407289 | 66430017 |
| chr7 | 66407289 | 66439304 |
| chr7 | 66423378 | 66423725 |
| chr7 | 66423378 | 66423796 |
| chr7 | 66427948 | 66430017 |
| chr7 | 66427948 | 66439304 |
| chr7 | 66439134 | 66485153 |
| chr7 | 66450070 | 66467719 |
| chr7 | 66450070 | 66485153 |
| chr7 | 66476258 | 66490107 |
| chr7 | 66479008 | 66488038 |
| chr7 | 66479008 | 66490107 |
| chr7 | 66491939 | 66492217 |
| chr7 | 66518161 | 66519312 |
| chr7 | 66528672 | 66529097 |
| chr7 | 66533323 | 66534217 |
| chr7 | 66534432 | 66537986 |
| chr7 | 66535305 | 66551349 |
| chr7 | 66540484 | 66540742 |
| chr7 | 66542612 | 66543379 |
| chr7 | 66543567 | 66544590 |
| chr7 | 66544834 | 66546136 |
| chr7 | 66681005 | 66681505 |
| chr7 | 66684351 | 66724454 |
| chr7 | 66696341 | 66696483 |

|      |           |           |
|------|-----------|-----------|
| chr7 | 66739584  | 66740075  |
| chr7 | 66742130  | 66743522  |
| chr7 | 66742720  | 66743196  |
| chr7 | 66742726  | 66743178  |
| chr7 | 66846360  | 66900897  |
| chr7 | 66848488  | 66880877  |
| chr7 | 66855671  | 66880877  |
| chr7 | 66880286  | 66880826  |
| chr7 | 66880286  | 66886455  |
| chr7 | 66882892  | 66886455  |
| chr7 | 66882892  | 66890411  |
| chr7 | 66889134  | 66889521  |
| chr7 | 66890250  | 66894018  |
| chr7 | 66890250  | 66898294  |
| chr7 | 66898178  | 66900897  |
| chr7 | 6708300   | 6709039   |
| chr7 | 67243494  | 67279526  |
| chr7 | 6731172   | 6731562   |
| chr7 | 6731207   | 6731528   |
| chr7 | 67413632  | 67435727  |
| chr7 | 6751866   | 6752780   |
| chr7 | 6794202   | 6794535   |
| chr7 | 69040490  | 69040699  |
| chr7 | 722753    | 724864    |
| chr7 | 74255596  | 74255853  |
| chr7 | 74875952  | 74876373  |
| chr7 | 84793668  | 84889860  |
| chr7 | 84793809  | 84889860  |
| chr7 | 85153607  | 85224441  |
| chr7 | 85191646  | 85193238  |
| chr7 | 88196544  | 88197239  |
| chr7 | 91626135  | 91626656  |
| chr7 | 93786566  | 93797279  |
| chr7 | 94061455  | 94061864  |
| chr7 | 94061455  | 94064477  |
| chr7 | 96665941  | 96673859  |
| chr7 | 96672721  | 96673859  |
| chr7 | 9688501   | 9719071   |
| chr7 | 9708000   | 9716909   |
| chr7 | 9708000   | 9719071   |
| chr7 | 97396868  | 97400188  |
| chr7 | 978011    | 979061    |
| chr8 | 103246293 | 103246684 |
| chr8 | 116637954 | 116641259 |
| chr8 | 117580726 | 117678348 |

|      |           |           |
|------|-----------|-----------|
| chr8 | 117797934 | 117799315 |
| chr8 | 12014830  | 12015529  |
| chr8 | 123003992 | 123004504 |
| chr8 | 123452562 | 123453459 |
| chr8 | 127798211 | 127804635 |
| chr8 | 127806368 | 127807862 |
| chr8 | 127842514 | 127843102 |
| chr8 | 127853688 | 127856436 |
| chr8 | 127890211 | 127890493 |
| chr8 | 128152676 | 128155419 |
| chr8 | 129941568 | 129942077 |
| chr8 | 129957132 | 129959543 |
| chr8 | 133408173 | 133408387 |
| chr8 | 134812609 | 134813169 |
| chr8 | 141250923 | 141254211 |
| chr8 | 141296205 | 141300145 |
| chr8 | 142455078 | 142455231 |
| chr8 | 143632289 | 143634770 |
| chr8 | 143638645 | 143638987 |
| chr8 | 143639180 | 143640655 |
| chr8 | 143640578 | 143641432 |
| chr8 | 143640848 | 143644115 |
| chr8 | 144135635 | 144136000 |
| chr8 | 16495792  | 16497989  |
| chr8 | 16495792  | 16514838  |
| chr8 | 36458581  | 36507411  |
| chr8 | 38101049  | 38101406  |
| chr8 | 48424352  | 48429056  |
| chr8 | 54023228  | 54023897  |
| chr8 | 55826706  | 55827423  |
| chr8 | 55827138  | 55827423  |
| chr8 | 56050156  | 56050949  |
| chr8 | 61628999  | 61629368  |
| chr8 | 63558679  | 63560116  |
| chr8 | 66616187  | 66617276  |
| chr8 | 74407087  | 74407621  |
| chr8 | 77006817  | 77007102  |
| chr8 | 77560573  | 77582405  |
| chr8 | 77578034  | 77609934  |
| chr8 | 77582169  | 77587459  |
| chr8 | 77582169  | 77639385  |
| chr8 | 78933742  | 78943071  |
| chr8 | 81549711  | 81596464  |
| chr8 | 81593228  | 81613828  |
| chr8 | 81650820  | 81652327  |

|      |           |           |
|------|-----------|-----------|
| chr8 | 8922288   | 8922750   |
| chr8 | 89587890  | 89596481  |
| chr8 | 89587909  | 89596512  |
| chr8 | 90554350  | 90554666  |
| chr8 | 93955054  | 93955893  |
| chr8 | 97569024  | 97601212  |
| chr9 | 105950113 | 105977778 |
| chr9 | 110194874 | 110198574 |
| chr9 | 111946477 | 111946969 |
| chr9 | 112013211 | 112014047 |
| chr9 | 114318193 | 114319492 |
| chr9 | 120126446 | 120132905 |
| chr9 | 120359196 | 120363376 |
| chr9 | 121057893 | 121067564 |
| chr9 | 125263550 | 125273649 |
| chr9 | 125264949 | 125279325 |
| chr9 | 12610570  | 12631607  |
| chr9 | 12610904  | 12631607  |
| chr9 | 127901530 | 127902268 |
| chr9 | 129208868 | 129209236 |
| chr9 | 130815115 | 130816266 |
| chr9 | 131538592 | 131538921 |
| chr9 | 135908651 | 135909486 |
| chr9 | 21324075  | 21330913  |
| chr9 | 22269012  | 22284962  |
| chr9 | 22270998  | 22284962  |
| chr9 | 22270998  | 22301707  |
| chr9 | 22301599  | 22303231  |
| chr9 | 22301599  | 22308883  |
| chr9 | 22466115  | 22468710  |
| chr9 | 22466341  | 22526934  |
| chr9 | 23030864  | 23076101  |
| chr9 | 25527947  | 25622103  |
| chr9 | 2667150   | 2668061   |
| chr9 | 2777872   | 2783594   |
| chr9 | 31942990  | 31973112  |
| chr9 | 32020881  | 32021092  |
| chr9 | 32020881  | 32032270  |
| chr9 | 32112169  | 32121665  |
| chr9 | 32140008  | 32157552  |
| chr9 | 32946387  | 32947618  |
| chr9 | 34680905  | 34682982  |
| chr9 | 35594874  | 35597388  |
| chr9 | 35772162  | 35786775  |
| chr9 | 35780266  | 35782174  |

|      |          |          |
|------|----------|----------|
| chr9 | 37407284 | 37409356 |
| chr9 | 37873238 | 37873801 |
| chr9 | 37874947 | 37885334 |
| chr9 | 37886217 | 37887520 |
| chr9 | 41736441 | 41736723 |
| chr9 | 42856951 | 42864465 |
| chr9 | 42861683 | 42877817 |
| chr9 | 42978850 | 42986862 |
| chr9 | 5573511  | 5573935  |
| chr9 | 61917467 | 61920435 |
| chr9 | 78275430 | 78275747 |
| chr9 | 78348315 | 78450197 |
| chr9 | 78420279 | 78422192 |
| chr9 | 78420279 | 78422263 |
| chr9 | 78420279 | 78423212 |
| chr9 | 78598224 | 78624433 |
| chr9 | 83574088 | 83575055 |
| chr9 | 83574909 | 83586368 |
| chr9 | 91717306 | 91722580 |
| chr9 | 91718638 | 91719168 |
| chr9 | 93435500 | 93441373 |
| chr9 | 93439402 | 93441373 |
| chr9 | 96146620 | 96147084 |
| chr9 | 96719508 | 96721130 |
| chr9 | 96895895 | 96898127 |
| chr9 | 96895895 | 96903108 |
| chr9 | 96913237 | 96913633 |
| chr9 | 97122170 | 97151237 |
| chr9 | 97135545 | 97139954 |
| chr9 | 97138642 | 97139954 |
| chr9 | 97138781 | 97139954 |
| chr9 | 97139852 | 97144740 |
| chr9 | 97139852 | 97144760 |
| chr9 | 97139852 | 97146151 |
| chr9 | 97139852 | 97148100 |
| chr9 | 97139852 | 97148191 |
| chr9 | 97139852 | 97151237 |
| chr9 | 97139852 | 97161966 |
| chr9 | 97143857 | 97144740 |
| chr9 | 97178263 | 97191798 |
| chr9 | 97185441 | 97194840 |
| chr9 | 97185441 | 97196594 |
| chr9 | 97188464 | 97200565 |
| chr9 | 97188464 | 97211487 |
| chr9 | 98018288 | 98026451 |

|             |           |           |
|-------------|-----------|-----------|
| chrM        | 13332     | 13587     |
| chrM        | 8657      | 9189      |
| Un_GL00019! | 18321     | 19683     |
| Un_KI270742 | 1325      | 34982     |
| chrX        | 100949107 | 100962973 |
| chrX        | 10252888  | 10287891  |
| chrX        | 102897573 | 102905737 |
| chrX        | 102897573 | 102926537 |
| chrX        | 103428627 | 103450660 |
| chrX        | 103428627 | 103461354 |
| chrX        | 103438261 | 103438892 |
| chrX        | 103449273 | 103450660 |
| chrX        | 103449273 | 103486459 |
| chrX        | 103464128 | 103466155 |
| chrX        | 103612238 | 103612987 |
| chrX        | 107029126 | 107030315 |
| chrX        | 10899315  | 11056036  |
| chrX        | 10924729  | 10925298  |
| chrX        | 11038602  | 11110981  |
| chrX        | 11055935  | 11110981  |
| chrX        | 115566067 | 115568006 |
| chrX        | 121078057 | 121093477 |
| chrX        | 121090398 | 121093477 |
| chrX        | 121090398 | 121164157 |
| chrX        | 121090398 | 121185843 |
| chrX        | 121151610 | 121185843 |
| chrX        | 121163288 | 121185843 |
| chrX        | 121164058 | 121185843 |
| chrX        | 121290859 | 121291842 |
| chrX        | 121529566 | 121560542 |
| chrX        | 121540922 | 121646582 |
| chrX        | 121646461 | 121736294 |
| chrX        | 121659247 | 121761171 |
| chrX        | 121736190 | 121761171 |
| chrX        | 121736190 | 121867909 |
| chrX        | 121736190 | 121906789 |
| chrX        | 121863502 | 121906789 |
| chrX        | 126137960 | 126139299 |
| chrX        | 126243345 | 126250294 |
| chrX        | 126243345 | 126287274 |
| chrX        | 129116609 | 129122193 |
| chrX        | 129116609 | 129169451 |
| chrX        | 129319081 | 129326008 |
| chrX        | 129993458 | 129994022 |
| chrX        | 131332206 | 131364926 |



|      |           |           |
|------|-----------|-----------|
| chrX | 131332206 | 131369052 |
| chrX | 131344059 | 131364926 |
| chrX | 131344812 | 131364926 |
| chrX | 131364748 | 131369052 |
| chrX | 131364748 | 131399704 |
| chrX | 131389016 | 131399704 |
| chrX | 131491212 | 131495163 |
| chrX | 131538342 | 131540937 |
| chrX | 134444877 | 134453899 |
| chrX | 135008542 | 135019149 |
| chrX | 135034668 | 135038178 |
| chrX | 135034668 | 135049428 |
| chrX | 135942878 | 135947139 |
| chrX | 135942878 | 135960073 |
| chrX | 135946564 | 135947139 |
| chrX | 13666316  | 13680598  |
| chrX | 136820680 | 136847899 |
| chrX | 136820680 | 136848582 |
| chrX | 136847804 | 136848582 |
| chrX | 136857061 | 136857499 |
| chrX | 1383565   | 1384425   |
| chrX | 1383600   | 1384388   |
| chrX | 139842395 | 139877277 |
| chrX | 141715007 | 141721898 |
| chrX | 141715007 | 141737585 |
| chrX | 144233227 | 144297079 |
| chrX | 144233227 | 144341556 |
| chrX | 144341463 | 144390125 |
| chrX | 144706102 | 144715226 |
| chrX | 152451699 | 152458262 |
| chrX | 152457249 | 152458262 |
| chrX | 152457249 | 152459530 |
| chrX | 152457249 | 152487023 |
| chrX | 152468181 | 152487023 |
| chrX | 152554376 | 152568217 |
| chrX | 152554376 | 152574980 |
| chrX | 153438907 | 153441548 |
| chrX | 154395361 | 154396024 |
| chrX | 155139218 | 155172714 |
| chrX | 155168139 | 155175179 |
| chrX | 155399000 | 155419562 |
| chrX | 155415574 | 155419562 |
| chrX | 16462842  | 16463063  |
| chrX | 1726066   | 1726488   |
| chrX | 1732512   | 1734211   |

|      |          |          |
|------|----------|----------|
| chrX | 1759980  | 1760310  |
| chrX | 2211488  | 2212828  |
| chrX | 27102783 | 27186657 |
| chrX | 27158904 | 27186657 |
| chrX | 27162420 | 27186657 |
| chrX | 27301038 | 27336493 |
| chrX | 27336409 | 27376091 |
| chrX | 45769785 | 45784155 |
| chrX | 487169   | 487610   |
| chrX | 49265842 | 49266298 |
| chrX | 510260   | 510945   |
| chrX | 54636234 | 54636427 |
| chrX | 55985998 | 56014961 |
| chrX | 56002824 | 56014961 |
| chrX | 57087613 | 57095538 |
| chrX | 57091049 | 57095538 |
| chrX | 57842245 | 57850693 |
| chrX | 63259667 | 63315853 |
| chrX | 63259667 | 63343289 |
| chrX | 63307505 | 63345571 |
| chrX | 63313751 | 63345571 |
| chrX | 63314996 | 63345571 |
| chrX | 63911327 | 63934393 |
| chrX | 65051461 | 65113813 |
| chrX | 65060697 | 65075912 |
| chrX | 65075473 | 65075912 |
| chrX | 65075473 | 65107023 |
| chrX | 65075473 | 65113813 |
| chrX | 65075605 | 65107023 |
| chrX | 65075605 | 65113813 |
| chrX | 65106918 | 65113813 |
| chrX | 65113663 | 65118284 |
| chrX | 65175160 | 65175753 |
| chrX | 65366637 | 65368998 |
| chrX | 65366637 | 65398704 |
| chrX | 65366637 | 65446000 |
| chrX | 67761872 | 67791892 |
| chrX | 76147252 | 76148456 |
| chrX | 76224487 | 76242405 |
| chrX | 77896308 | 77896804 |
| chrX | 81324575 | 81328708 |
| chrX | 91562992 | 91661744 |
| chrX | 91616342 | 91638418 |
| chrX | 91616342 | 91662446 |
| chrX | 97626153 | 97639812 |

|      |          |          |
|------|----------|----------|
| chrX | 97635274 | 97639812 |
| chrX | 97637436 | 97639812 |

**IncompleteExon (289)**

|       |           |           |
|-------|-----------|-----------|
| chr1  | 109252789 | 109252982 |
| chr1  | 110341550 | 110341832 |
| chr1  | 150575338 | 150575695 |
| chr1  | 154156515 | 154157213 |
| chr1  | 155562555 | 155562821 |
| chr1  | 156743123 | 156743420 |
| chr1  | 156743256 | 156743444 |
| chr1  | 15931188  | 15931413  |
| chr1  | 162522517 | 162522962 |
| chr1  | 19216778  | 19217489  |
| chr1  | 19259017  | 19260012  |
| chr1  | 200849332 | 200849701 |
| chr1  | 202962119 | 202962382 |
| chr1  | 204552180 | 204552423 |
| chr1  | 205774938 | 205775164 |
| chr1  | 240092041 | 240092400 |
| chr1  | 26696426  | 26696950  |
| chr1  | 28497464  | 28499171  |
| chr1  | 30869737  | 30870042  |
| chr1  | 43972427  | 43972744  |
| chr1  | 43972775  | 43973346  |
| chr1  | 45509624  | 45509866  |
| chr1  | 58782149  | 58782786  |
| chr1  | 6222395   | 6223195   |
| chr1  | 63659765  | 63660161  |
| chr1  | 6522806   | 6524849   |
| chr1  | 9267030   | 9268037   |
| chr10 | 101579445 | 101579615 |
| chr10 | 102147082 | 102147359 |
| chr10 | 104025835 | 104026576 |
| chr10 | 17229460  | 17229850  |
| chr10 | 79354333  | 79354659  |
| chr10 | 91908226  | 91908693  |
| chr11 | 2403440   | 2403617   |
| chr11 | 61786740  | 61786908  |
| chr11 | 61796713  | 61797143  |
| chr11 | 62129957  | 62130312  |
| chr11 | 64371521  | 64371829  |
| chr11 | 65320787  | 65321131  |
| chr11 | 65424450  | 65444063  |
| chr11 | 65434478  | 65435145  |
| chr11 | 65434478  | 65437657  |

|       |           |           |
|-------|-----------|-----------|
| chr11 | 65434478  | 65439001  |
| chr11 | 65434478  | 65444063  |
| chr11 | 65435052  | 65436666  |
| chr11 | 65435052  | 65437657  |
| chr11 | 65435052  | 65444059  |
| chr11 | 65435052  | 65444063  |
| chr11 | 65435066  | 65444059  |
| chr11 | 65435066  | 65444063  |
| chr11 | 65435343  | 65444063  |
| chr11 | 65436522  | 65444059  |
| chr11 | 65436537  | 65444059  |
| chr11 | 65436537  | 65444063  |
| chr11 | 65499911  | 65500426  |
| chr11 | 65500911  | 65505019  |
| chr11 | 65502289  | 65504595  |
| chr11 | 65502320  | 65504206  |
| chr11 | 65502320  | 65504595  |
| chr11 | 65502320  | 65505019  |
| chr11 | 65503116  | 65504595  |
| chr11 | 65503116  | 65505019  |
| chr11 | 65503120  | 65504595  |
| chr11 | 65503120  | 65504744  |
| chr11 | 65503728  | 65503931  |
| chr11 | 65503728  | 65504358  |
| chr11 | 65503728  | 65504595  |
| chr11 | 65503728  | 65505019  |
| chr11 | 65503853  | 65504595  |
| chr11 | 65503853  | 65505019  |
| chr11 | 65504325  | 65505019  |
| chr11 | 65504664  | 65505301  |
| chr11 | 65504819  | 65505019  |
| chr11 | 65505301  | 65505606  |
| chr11 | 67285312  | 67285959  |
| chr11 | 69651354  | 69651675  |
| chr11 | 69651774  | 69652233  |
| chr11 | 69654031  | 69654355  |
| chr11 | 73662218  | 73662658  |
| chr11 | 75406202  | 75406492  |
| chr11 | 76383673  | 76384417  |
| chr11 | 768729    | 769573    |
| chr11 | 769036    | 769415    |
| chr11 | 769087    | 769661    |
| chr11 | 95128538  | 95128749  |
| chr12 | 105020454 | 105022254 |
| chr12 | 112506422 | 112507953 |

|       |           |           |
|-------|-----------|-----------|
| chr12 | 120698058 | 120699112 |
| chr12 | 122143443 | 122143620 |
| chr12 | 124911698 | 124912760 |
| chr12 | 132722070 | 132722239 |
| chr12 | 1492816   | 1493170   |
| chr12 | 57096211  | 57096640  |
| chr12 | 98548946  | 98549335  |
| chr13 | 109782961 | 109783488 |
| chr13 | 21374527  | 21374880  |
| chr13 | 23330939  | 23331307  |
| chr13 | 23333467  | 23334769  |
| chr13 | 23340204  | 23340593  |
| chr13 | 23354899  | 23355080  |
| chr13 | 23355505  | 23355841  |
| chr14 | 104946924 | 104948904 |
| chr14 | 21460507  | 21460723  |
| chr14 | 23058674  | 23059073  |
| chr14 | 31093701  | 31094760  |
| chr14 | 92059769  | 92059977  |
| chr15 | 100915603 | 100916259 |
| chr15 | 40220696  | 40221044  |
| chr15 | 50557937  | 50558499  |
| chr15 | 63264649  | 63264956  |
| chr15 | 64156404  | 64156665  |
| chr15 | 65888236  | 65888571  |
| chr15 | 75933741  | 75934479  |
| chr15 | 85580533  | 85580742  |
| chr16 | 11835033  | 11835602  |
| chr16 | 22287252  | 22288003  |
| chr16 | 2763640   | 2763883   |
| chr16 | 2973051   | 2973245   |
| chr16 | 29807000  | 29807505  |
| chr16 | 29810329  | 29810779  |
| chr16 | 29810541  | 29810788  |
| chr16 | 30580732  | 30580974  |
| chr16 | 30979468  | 30979806  |
| chr16 | 547606    | 548161    |
| chr16 | 87330641  | 87330864  |
| chr17 | 1344858   | 1345238   |
| chr17 | 3033554   | 3033944   |
| chr17 | 39256293  | 39257066  |
| chr17 | 44801060  | 44801884  |
| chr17 | 44805253  | 44805577  |
| chr17 | 4968050   | 4968501   |
| chr17 | 5025805   | 5027145   |

|       |           |           |
|-------|-----------|-----------|
| chr17 | 50750746  | 50751362  |
| chr17 | 50964510  | 50964872  |
| chr17 | 50964549  | 50964840  |
| chr17 | 517939    | 518459    |
| chr17 | 58001488  | 58005041  |
| chr17 | 58003650  | 58005041  |
| chr17 | 59203435  | 59203645  |
| chr17 | 75502414  | 75502822  |
| chr17 | 78171933  | 78172189  |
| chr17 | 81510291  | 81510612  |
| chr17 | 82614875  | 82615196  |
| chr18 | 13762870  | 13763271  |
| chr19 | 13154281  | 13154420  |
| chr19 | 13772154  | 13773506  |
| chr19 | 1555052   | 1556075   |
| chr19 | 16101602  | 16102900  |
| chr19 | 2429764   | 2430187   |
| chr19 | 33380103  | 33380381  |
| chr19 | 3464426   | 3464923   |
| chr19 | 39538878  | 39539476  |
| chr19 | 41303979  | 41304182  |
| chr19 | 44903046  | 44903470  |
| chr19 | 45550128  | 45552285  |
| chr19 | 45553262  | 45553581  |
| chr19 | 50045620  | 50045807  |
| chr19 | 55674122  | 55674621  |
| chr19 | 55674123  | 55674604  |
| chr19 | 55674124  | 55674602  |
| chr19 | 57455652  | 57456182  |
| chr19 | 57861375  | 57862570  |
| chr19 | 57861793  | 57862570  |
| chr19 | 57863364  | 57863759  |
| chr19 | 746873    | 747472    |
| chr19 | 810767    | 811135    |
| chr19 | 811666    | 812181    |
| chr2  | 121765509 | 121765913 |
| chr2  | 189854502 | 189855000 |
| chr2  | 203303215 | 203303468 |
| chr2  | 206307046 | 206308755 |
| chr2  | 20684815  | 20686956  |
| chr2  | 223755755 | 223756143 |
| chr2  | 227686100 | 227686445 |
| chr2  | 25739880  | 25740085  |
| chr2  | 40428474  | 40430301  |
| chr2  | 42350692  | 42351224  |

|       |           |           |
|-------|-----------|-----------|
| chr2  | 64552228  | 64552705  |
| chr2  | 69461890  | 69462413  |
| chr20 | 1165673   | 1166455   |
| chr20 | 25297189  | 25297444  |
| chr20 | 3047806   | 3047970   |
| chr20 | 326749    | 327166    |
| chr20 | 32848975  | 32849744  |
| chr20 | 33705527  | 33706035  |
| chr20 | 36046082  | 36046353  |
| chr20 | 3784471   | 3784807   |
| chr20 | 3784967   | 3785142   |
| chr20 | 3867456   | 3869139   |
| chr20 | 3867568   | 3869042   |
| chr20 | 41123291  | 41123867  |
| chr20 | 50889306  | 50889832  |
| chr21 | 14961813  | 14962555  |
| chr21 | 26836602  | 26836831  |
| chr21 | 33550219  | 33551289  |
| chr21 | 34102834  | 34103519  |
| chr22 | 18088683  | 18089796  |
| chr22 | 23894774  | 23895188  |
| chr22 | 36488075  | 36488630  |
| chr22 | 37568428  | 37568774  |
| chr22 | 37568849  | 37569109  |
| chr22 | 37805948  | 37806372  |
| chr22 | 40927396  | 40929273  |
| chr3  | 134356631 | 134356829 |
| chr3  | 141945430 | 141946776 |
| chr3  | 14944673  | 14944903  |
| chr3  | 185486430 | 185489016 |
| chr3  | 188882976 | 188883465 |
| chr3  | 196470237 | 196470728 |
| chr3  | 33152371  | 33152686  |
| chr3  | 38142235  | 38142445  |
| chr3  | 52075315  | 52075560  |
| chr3  | 9429830   | 9429989   |
| chr4  | 139388509 | 139389132 |
| chr4  | 165077031 | 165077551 |
| chr4  | 165077085 | 165077493 |
| chr4  | 2938442   | 2938625   |
| chr4  | 70689572  | 70690027  |
| chr4  | 75645135  | 75645625  |
| chr5  | 1037854   | 1038024   |
| chr5  | 126625943 | 126626478 |
| chr5  | 134900598 | 134900833 |

|      |           |           |
|------|-----------|-----------|
| chr5 | 138466844 | 138467320 |
| chr5 | 14615209  | 14615944  |
| chr5 | 14706775  | 14709036  |
| chr5 | 150400006 | 150400164 |
| chr5 | 154814075 | 154815294 |
| chr5 | 155014042 | 155014637 |
| chr5 | 172768394 | 172768780 |
| chr5 | 34831844  | 34832429  |
| chr5 | 453689    | 453995    |
| chr5 | 65668047  | 65668676  |
| chr5 | 65668054  | 65668676  |
| chr5 | 73447242  | 73448206  |
| chr5 | 73447480  | 73448201  |
| chr5 | 93584329  | 93584824  |
| chr6 | 105098712 | 105099121 |
| chr6 | 157206248 | 157206842 |
| chr6 | 30723619  | 30723775  |
| chr6 | 30723658  | 30724414  |
| chr6 | 30743562  | 30743769  |
| chr6 | 31632742  | 31632907  |
| chr6 | 33304466  | 33304611  |
| chr6 | 43615477  | 43615754  |
| chr6 | 43617842  | 43618265  |
| chr6 | 85494748  | 85495026  |
| chr7 | 107201683 | 107202138 |
| chr7 | 128685178 | 128685938 |
| chr7 | 135927081 | 135927388 |
| chr7 | 135929470 | 135929668 |
| chr7 | 138917367 | 138917692 |
| chr7 | 149283427 | 149283567 |
| chr7 | 151064572 | 151064741 |
| chr7 | 152646774 | 152648175 |
| chr7 | 22946006  | 22946145  |
| chr7 | 25119663  | 25121096  |
| chr7 | 25120363  | 25120897  |
| chr7 | 29923109  | 29923538  |
| chr7 | 5524824   | 5525118   |
| chr7 | 65954689  | 65955203  |
| chr7 | 66153996  | 66154226  |
| chr7 | 88196544  | 88197239  |
| chr8 | 100258473 | 100258925 |
| chr8 | 102412470 | 102412624 |
| chr8 | 127738349 | 127738838 |
| chr8 | 142344079 | 142344469 |
| chr8 | 43021954  | 43022920  |



|      |           |           |
|------|-----------|-----------|
| chr8 | 43023113  | 43023547  |
| chr8 | 96334111  | 96334477  |
| chr9 | 105520521 | 105520916 |
| chr9 | 105520622 | 105520916 |
| chr9 | 120857143 | 120857384 |
| chr9 | 134033073 | 134033279 |
| chr9 | 136114757 | 136115073 |
| chr9 | 137063010 | 137063161 |
| chr9 | 137063607 | 137063775 |
| chr9 | 137063791 | 137064102 |
| chr9 | 33676487  | 33676667  |
| chrX | 119538737 | 119539285 |
| chrX | 119538738 | 119539270 |
| chrX | 119539037 | 119539709 |
| chrX | 121048129 | 121048330 |
| chrX | 154011011 | 154011172 |
| chrX | 48560238  | 48560631  |
| chrX | 54561038  | 54562059  |
| chrX | 54562127  | 54562587  |
| chrX | 65740042  | 65740250  |
| chrX | 65740347  | 65740883  |
| chrX | 85091377  | 85091770  |
