# Supplementary material for: Accurate identification of circRNA landscape and complexity reveals their pivotal roles in human oligodendroglia differentiation
Source: PubMed Central journal article supplement (PMC8819885; doi:10.1186/s13059-022-02621-1), 2022-02-07
Supplement: 13059_2022_2621_MOESM4_ESM.pdf [file 13059_2022_2621_MOESM4_ESM.pdf]

| <b>Target</b> | <b>Forward Primer</b>   | <b>Reverse Primer</b>   |
|---------------|-------------------------|-------------------------|
| ID3           | ACTCAGCTTAGCCAGGTGGA    | AAGCTCCTTTTGTGCTTGGA    |
| CDCP1         | GTTCAAGCTGGAGGACAAGC    | CATGGCTCGCTCATTACTCA    |
| PDE4DIP       | GGAATTTTCGGGAGCTCCTAC   | TGGCGCAGTTCTTTTTCTTT    |
| TMEM97        | TTCTGTTTTGCGAGCTTG TG   | GAAACCACTGGCTTTGGAGA    |
| AURKB         | GGGAGAGCTGAAGATTGCTG    | GGCGATAGGTCTCGTTGTGT    |
| CREG1         | GCACAGACCAACTTCTGCAA    | AAGGCCAGGTTTTTCATCTCA   |
| NES           | AACAGCGACGGAGGTCTCTA    | TTCTCTTGTCCTCGCAGACTT   |
| MMP2          | ATGACAGCTGCACCACTGAG    | ATTTGTTGCCCAGGAAAGTG    |
| circHIPK3     | GCCAGAGAATATTATGTTGGTGG | GTAGACCAAGACTTGTGAGGC   |
| circSPATA13   | CCCCTGGAAGCCACACAT      | GTCCTGGCACTCACACCT      |
| circZBTB46    | CTGAAGGCCGACGTGCTG      | CAGGTGCCGGTAGTG GGA     |
| circPEX6      | TGGGCAAGTAGAGATCCTGG    | GCTGTAGTGGGGAGAAGACA    |
| HERC6         | CACTGGTCAGGTGGTATCTTT   | GCAGAAATCAGGCAGCTAATG   |
| SPATA13       | TTCCTGAAGACTCGGTTGCT    | CATACAAGCTGACCCACCT     |
| MYC           | GGCTCCTGGCAAAGGTCA      | CTGCGTAGTTGTGCTGATGT    |
| HIST1H2BM     | GAAAGAAGCGCAAACGCAG     | TGATTCCCATAGCCTTGGGAAGA |
| HIST1H3D      | CCATTCCAGCGTCTAGTCCG    | TCTGAAAACGCAGATCAGTCTTG |
| HIST3H2A      | GGTCGTGGTAAGCAGGGTG     | CGCTCCGAATAGTTGCCCTT    |
