# Supplementary material for: Accurate identification of circRNA landscape and complexity reveals their pivotal roles in human oligodendroglia differentiation
Source: PubMed Central journal article supplement (PMC8819885; doi:10.1186/s13059-022-02621-1), 2022-02-07
Supplement: 13059_2022_2621_MOESM5_ESM.pdf [file 13059_2022_2621_MOESM5_ESM.pdf]

| CircRNA                   | Copy Number | Gene             |
|---------------------------|-------------|------------------|
| chrX:100914620-100915083  | 25          | XKRX             |
| chr6:31271232-31356326    | 6668        | nogene           |
| chrX:131749305-131794466  | 1626        | FIRRE            |
| chr2:27987992-28045799    | 13          | BRE              |
| chr2:11765532-11767858    | 122         | LPIN1            |
| chr10:101667885-101676436 | 463         | FBXW4            |
| chr2:27987992-28025420    | 5           | BRE              |
| chr14:83646543-83666209   | 215         | nogene           |
| chr18:47865058-47896809   | 580         | SMAD2            |
| chr5:43294055-43297166    | 86          | HMGCS1           |
| chr12:27368261-27380404   | 2261        | ARNTL2           |
| chr7:24623665-24650712    | 1109        | MPP6             |
| chr7:18666212-18666476    | 84          | HDAC9            |
| chr7:155672866-155680908  | 3240        | RBM33            |
| chr12:69251128-69262562   | 2757        | CPSF6            |
| chr5:43295751-43297166    | 75          | HMGCS1           |
| chr4:80335743-80362884    | 115         | C4orf22          |
| chr13:24222818-24224582   | 2000        | SPATA13          |
| chr18:21765771-21779685   | 2824        | MIB1             |
| chr8:127890588-127890998  | 5153        | PVT1             |
| chr1:240123178-240188262  | 87          | FMN2             |
| chr9:20923659-20933103    | 114         | FOCAD            |
| chr1:24514313-24514567    | 97          | RCAN3            |
| chr16:47109482-47132025   | 1127        | NETO2            |
| chr7:155301565-155302417  | 4           | INSIG1           |
| chr7:131375423-131399433  | 606         | MKLN1            |
| chr14:102040235-102040673 | 587         | DYNC1H1          |
| chr3:11358417-11426926    | 107         | ATG7             |
| chr2:206279539-206297373  | 829         | ZDBF2            |
| chr8:125008970-125009343  | 227         | SQLE             |
| chr5:43292473-43297166    | 138         | HMGCS1           |
| chr1:9871186-9877989      | 32          | CTNNBIP1         |
| chr5:179822957-179833782  | 85          | SQSTM1           |
| chr8:1565682-1565894      | 134         | DLGAP2           |
| chr4:80295558-80362884    | 219         | C4orf22          |
| chr13:29453067-29487935   | 115         | nogene           |
| chr9:20923659-20933132    | 59          | FOCAD            |
| chr17:83035034-83048785   | 416         | B3GNTL1          |
| chr15:62007307-62013992   | 425         | VPS13C           |
| chr15:100330888-100334180 | 518         | ADAMTS17         |
| chr9:4286037-4286523      | 481         | GLIS3            |
| chr3:196323743-196324440  | 130         | TM4SF19-TCTEX1D2 |

|                           |      |          |
|---------------------------|------|----------|
| chrX:100948917-100949326  | 0    | nogene   |
| chr2:10141853-10142375    | 318  | C2orf48  |
| chr5:73749836-73753202    | 132  | ARHGEF28 |
| chr7:24623662-24668660    | 381  | MPP6     |
| chr6:29887954-29942626    | 2028 | HLA-H    |
| chr3:120750522-120751000  | 197  | GTF2E1   |
| chr22:42519713-42580359   | 445  | RRP7A    |
| chr13:29453067-29492665   | 93   | nogene   |
| chr19:11120091-11120522   | 361  | LDLR     |
| chr19:53521855-53576853   | 21   | nogene   |
| chr1:172551511-172570730  | 91   | SUCO     |
| chr13:24249476-24251862   | 1366 | SPATA13  |
| chr10:101672914-101676436 | 115  | FBXW4    |
| chr6:4891712-4892379      | 6643 | CDYL     |
| chr6:56851396-56900621    | 128  | DST      |
| chr9:95978060-96004701    | 519  | ERCC6L2  |
| chr15:49225204-49239367   | 173  | GALK2    |
| chr17:6080370-6095223     | 108  | WSCD1    |
| chr8:1565682-1633046      | 104  | DLGAP2   |
| chr7:43639448-43640649    | 826  | COA1     |
| chr21:45525816-45538008   | 141  | SLC19A1  |
| chr2:175970763-175995646  | 389  | KIAA1715 |
| chrX:100914620-100949326  | 8    | nogene   |
| chr10:49493116-49506012   | 116  | ERCC6    |
| chr13:23353784-23371165   | 947  | SACS     |
| chr5:1278640-1282624      | 300  | TERT     |
| chr9:93471140-93498886    | 1425 | FAM120A  |
| chr7:24623662-24650712    | 290  | MPP6     |
| chr13:32517856-32527532   | 1153 | N4BP2L2  |
| chr7:158759485-158764853  | 645  | ESYT2    |
| chr7:23185069-23185298    | 188  | NUPL2    |
| chr5:145796441-145826200  | 576  | PRELID2  |
| chr21:45128401-45134832   | 603  | ADARB1   |
| chr1:155438326-155459898  | 874  | ASH1L    |
| chrM:8397-8608            | 411  | nogene   |
| chrX:68192918-68201710    | 108  | OPHN1    |
| chr1:8541213-8557523      | 328  | RERE     |
| chr5:131548046-131604693  | 65   | RAPGEF6  |
| chr1:197642710-197658369  | 89   | DENND1B  |
| chr5:73074741-73077493    | 248  | FCHO2    |
| chr6:10703404-10704844    | 285  | PAK1IP1  |
| chr2:231206197-231216793  | 6    | ARMC9    |
| chr11:65503728-65505019   | 12   | nogene   |

|                              |      |           |
|------------------------------|------|-----------|
| chr12:46229152-46243314      | 2173 | SLC38A1   |
| chr4:87195323-87195690       | 343  | KLHL8     |
| chr12:11034781-11047188      | 94   | PRH1-PRR4 |
| chr12:27368261-27390239      | 338  | ARNTL2    |
| chr7:30550635-30562128       | 13   | LOC401320 |
| chrX:101041316-101042312     | 193  | TRMT2B    |
| chr12:27368261-27376416      | 339  | ARNTL2    |
| chr10:33254027-33270856      | 0    | NRP1      |
| chr5:180261683-180280608     | 1152 | MAPK9     |
| chrX:68063853-68073299       | 12   | OPHN1     |
| chr22:42516010-42577098      | 206  | RRP7A     |
| chr2:230442936-230450255     | 236  | SP100     |
| chr2:27987992-27995456       | 0    | BRE       |
| chr1:243545509-243573048     | 239  | AKT3      |
| chr1:11030175-11030882       | 60   | MASP2     |
| chr10:50433475-50590247      | 28   | SGMS1     |
| chr7:24623665-24668660       | 762  | MPP6      |
| chr6:42592150-42594304       | 129  | UBR2      |
| chrUn_GL000218v1:90229-90629 | 116  | nogene    |
| chr2:68490189-68545312       | 123  | APLF      |
| chr5:134199085-134206131     | 405  | PPP2CA    |
| chr3:111913318-111920419     | 162  | PHLDB2    |
| chr11:14771936-14789242      | 303  | PDE3B     |
| chr2:11802906-11805156       | 33   | LPIN1     |
| chr21:15014343-15043574      | 1656 | NRIP1     |
| chr12:27368261-27371447      | 192  | ARNTL2    |
| chr1:247156405-247159813     | 2006 | ZNF124    |
| chr14:96846094-96860735      | 371  | VRK1      |
| chr1:247155565-247159813     | 2019 | ZNF124    |
| chr11:62839113-62839867      | 746  | WDR74     |
| chr12:69800208-69801721      | 401  | RAB3IP    |
| chr3:197282678-197282845     | 0    | DLG1      |
| chr5:108348398-108367953     | 403  | FBXL17    |
| chr11:2951258-2979237        | 389  | NAP1L4    |
| chr11:6932093-6955782        | 200  | ZNF215    |
| chr12:77940318-78021862      | 319  | NAV3      |
| chr3:27411641-27424152       | 375  | SLC4A7    |
| chr13:23879267-23886506      | 211  | MIPEP     |
| chr20:63672082-63672549      | 48   | nogene    |
| chr14:99458278-99465813      | 1519 | SETD3     |
| chr7:47994314-47996146       | 42   | SUN3      |
| chr18:9931809-9937066        | 3004 | VAPA      |
| chr5:112981041-112992248     | 0    | DCP2      |

|                          |     |           |
|--------------------------|-----|-----------|
| chr1:149655698-149669310 | 54  | LINC00869 |
| chr4:74174505-74225394   | 108 | MTHFD2L   |
| chr11:46076753-46092223  | 259 | PHF21A    |
| chr9:131506113-131506453 | 223 | POMT1     |
| chr1:178123047-178125501 | 15  | nogene    |
| chr1:155732500-155732748 | 46  | nogene    |
| chr14:96852830-96860735  | 130 | VRK1      |
| chr22:16637039-16638740  | 528 | TPTEP1    |
| chr9:93471140-93476338   | 987 | FAM120A   |
| chr18:8783529-8786091    | 43  | MTCL1     |
| chr7:11061790-11111467   | 904 | PHF14     |
| chr3:11298685-11299416   | 3   | ATG7      |
| chr2:168063499-168129758 | 168 | STK39     |
| chr1:23030468-23044486   | 149 | KDM1A     |
| chr1:19158747-19158910   | 46  | nogene    |
| chr16:1809237-1809833    | 196 | HAGH      |
| chr8:108228266-108241913 | 297 | EIF3E     |
| chr4:112562370-112585725 | 409 | ZGRF1     |
| chr12:1104749-1116033    | 231 | ERC1      |
| chr10:28583398-28596041  | 84  | WAC       |
| chr3:104817472-104855451 | 242 | nogene    |
| chr11:70659827-70661678  | 299 | SHANK2    |
| chr9:14146688-14179780   | 51  | NFIB      |
| chr6:158573419-158625754 | 188 | TMEM181   |
| chr16:8920358-8930397    | 215 | USP7      |
| chrX:100949107-100957528 | 0   | nogene    |
| chrX:68096869-68119332   | 6   | OPHN1     |
| chr7:22308338-22318037   | 809 | RAPGEF5   |
| chr10:45752587-45753237  | 58  | FAM21C    |
| chr9:21476898-21477292   | 202 | MIR31HG   |
| chr12:77940318-78007445  | 247 | NAV3      |
| chr1:45640209-45642499   | 129 | GPBP1L1   |
| chr16:30664214-30666541  | 650 | FBRS      |
| chr4:4086657-4087393     | 197 | nogene    |
| chr4:1311978-1327703     | 267 | MAEA      |
| chr11:9437753-9442197    | 39  | IPO7      |
| chr2:210098085-210154611 | 20  | KANSL1L   |
| chr13:21167987-21168399  | 251 | SKA3      |
| chr6:33776953-33786774   | 6   | LEMD2     |
| chr19:4950610-4950996    | 254 | UHRF1     |
| chr6:83018972-83044659   | 417 | UBE3D     |
| chr14:54981539-55002185  | 39  | WDHD1     |
| chr6:42974002-42975038   | 369 | PEX6      |

|                           |     |          |
|---------------------------|-----|----------|
| chr7:2213211-2219456      | 224 | MAD1L1   |
| chr18:21765771-21819646   | 271 | MIB1     |
| chr17:82900650-82911789   | 689 | TBCD     |
| chr11:87157340-87158771   | 49  | TMEM135  |
| chr18:69010933-69054133   | 18  | CCDC102B |
| chr12:50981638-51010766   | 1   | SLC11A2  |
| chr12:82369386-82403130   | 33  | METTTL25 |
| chr1:94220257-94231643    | 307 | ARHGAP29 |
| chr1:40189054-40202614    | 381 | RLF      |
| chr19:8539731-8546207     | 2   | nogene   |
| chr7:149494203-149621172  | 140 | ZNF746   |
| chr5:115866669-115870128  | 279 | AP3S1    |
| chrM:8436-14066           | 424 | nogene   |
| chr13:112516439-112527484 | 243 | TUBGCP3  |
| chr11:108319953-108327758 | 0   | ATM      |
| chr9:35295695-35313989    | 144 | UNC13B   |
| chrX:107840669-107854704  | 427 | MID2     |
| chr1:9931890-9934860      | 664 | LZIC     |
| chr6:107503656-107506427  | 623 | SOBP     |
| chr14:104946924-104948904 | 77  | nogene   |
| chr11:61796713-61797143   | 35  | nogene   |
| chrX:21978874-21992712    | 745 | SMS      |
| chr19:31125783-31131933   | 51  | nogene   |
| chr18:9931809-9950568     | 230 | VAPA     |
| chr1:20770929-20773610    | 110 | HP1BP3   |
| chr8:53811163-53829533    | 171 | ATP6V1H  |
| chr6:70589007-70589260    | 96  | nogene   |
| chr12:69251128-69269668   | 134 | CPSF6    |
| chr13:29517143-29517790   | 140 | SLC7A1   |
| chr5:171391304-171392978  | 360 | NPM1     |
| chr11:108715878-108723462 | 163 | DDX10    |
| chr17:82248874-82249602   | 73  | CSNK1D   |
| chr21:46537223-46541895   | 34  | DIP2A    |
| chr6:89751430-89753622    | 508 | MDN1     |
| chr19:11113277-11113762   | 82  | LDLR     |
| chr9:22301599-22347226    | 1   | nogene   |
| chr17:61744431-61780401   | 152 | BRIP1    |
| chr9:96458378-96471094    | 206 | HABP4    |
| chr11:74789625-74817714   | 638 | RNF169   |
| chr14:102830333-102897401 | 53  | TRAF3    |
| chr2:36358903-36396787    | 378 | CRIM1    |
| chr2:168161786-168167407  | 124 | STK39    |
| chr12:27714779-27724186   | 967 | MRPS35   |

|                           |      |               |
|---------------------------|------|---------------|
| chr11:32587011-32589135   | 47   | EIF3M         |
| chr22:45689711-45718493   | 412  | ATXN10        |
| chr6:43588001-43588486    | 33   | nogene        |
| chr7:75472861-75473093    | 100  | nogene        |
| chr16:11020192-11024921   | 190  | CLEC16A       |
| chr11:68347846-68357847   | 78   | LRP5          |
| chr1:97679094-97721671    | 0    | DPYD          |
| chr1:43671504-43683804    | 0    | KDM4A         |
| chr4:165219933-165263359  | 765  | KLHL2         |
| chr22:33761370-33765953   | 318  | LARGE         |
| chr14:49825866-49831361   | 34   | NEMF          |
| chr7:75394972-75395503    | 2    | nogene        |
| chr6:47503279-47554766    | 171  | CD2AP         |
| chr6:7410385-7411451      | 121  | RIOK1         |
| chr1:229286485-229304000  | 68   | RAB4A         |
| chr8:144190783-144200541  | 117  | MROH1         |
| chr1:45566568-45567020    | 364  | AKR1A1        |
| chr11:77691158-77693611   | 3    | RSF1          |
| chr5:123545416-123545841  | 35   | CSNK1G3       |
| chr5:129104955-129107062  | 503  | ISOC1         |
| chr1:202773117-202777094  | 33   | KDM5B         |
| chr12:19462509-19473355   | 1151 | AEBP2         |
| chr4:139137629-139139497  | 42   | ELF2          |
| chr8:134600435-134610655  | 98   | ZFAT          |
| chr17:83005114-83048785   | 49   | B3GNTL1       |
| chr13:52417991-52427219   | 125  | VPS36         |
| chr10:18553509-18562797   | 53   | nogene        |
| chr1:64812737-64814840    | 33   | RAVER2        |
| chr8:18765448-18804898    | 175  | PSD3          |
| chr10:78035351-78040747   | 33   | RPS24         |
| chr10:5785141-5800705     | 1183 | GDI2          |
| chr18:54877566-54884436   | 0    | RAB27B        |
| chr11:74225204-74239256   | 150  | PPME1         |
| chr14:75109684-75110371   | 108  | NEK9          |
| chr11:123083084-123084713 | 56   | CLMP          |
| chr3:142093060-142101841  | 116  | TFDP2         |
| chr16:30200724-30201293   | 166  | SLX1B-SULT1A4 |
| chr12:19473247-19514784   | 121  | AEBP2         |
| chr20:19997666-19998073   | 122  | nogene        |
| chr2:84441046-84449752    | 112  | SUCLG1        |
| chr10:6157523-6157996     | 42   | nogene        |
| chr17:6087989-6095223     | 56   | WSCD1         |
| chr18:47865058-47870564   | 170  | SMAD2         |

|                          |      |          |
|--------------------------|------|----------|
| chr17:7945727-7945986    | 92   | CNTROB   |
| chr19:11110651-11111639  | 8    | LDLR     |
| chr17:1548295-1558559    | 107  | PITPNA   |
| chr5:150445608-150447735 | 76   | RPS14    |
| chr17:20253504-20306082  | 3    | SPECC1   |
| chr19:45398004-45398339  | 372  | PPP1R13L |
| chr1:245858495-245863886 | 147  | SMYD3    |
| chr11:74118227-74123135  | 1    | C2CD3    |
| chr4:110488540-110520366 | 0    | ENPEP    |
| chr15:41696074-41713496  | 76   | MGA      |
| chr22:36488075-36488630  | 79   | nogene   |
| chr2:173358711-173367831 | 67   | CDCA7    |
| chr3:128262127-128264781 | 583  | EEFSEC   |
| chr11:64228264-64228894  | 33   | nogene   |
| chr17:80922723-80925480  | 190  | RPTOR    |
| chr8:125003175-125005705 | 0    | SQLE     |
| chr18:8718423-8720496    | 1629 | MTCL1    |
| chr7:18762156-18874596   | 1    | HDAC9    |
| chr4:127982938-127989821 | 0    | C4orf29  |
| chr16:31297513-31297954  | 101  | ITGAM    |
| chr5:179705678-179710065 | 462  | CANX     |
| chr20:35899369-35899648  | 10   | PHF20    |
| chr8:116655855-116658980 | 927  | EIF3H    |
| chr20:51366448-51368853  | 58   | nogene   |
| chr11:6932093-6943641    | 54   | ZNF215   |
| chr8:99274197-99275254   | 117  | VPS13B   |
| chrX:68052539-68053810   | 2    | OPHN1    |
| chr12:22493222-22506819  | 39   | C2CD5    |
| chr20:62854015-62860308  | 188  | TCFL5    |
| chr19:51860903-51886912  | 383  | ZNF577   |
| chr10:84417770-84425893  | 497  | CCSER2   |
| chr11:18083534-18089510  | 93   | SAAL1    |
| chr7:93276164-93323732   | 29   | VPS50    |
| chr7:92126252-92131872   | 80   | CYP51A1  |
| chr9:128507215-128509097 | 29   | GLE1     |
| chr11:65435052-65444063  | 156  | nogene   |
| chr12:70278131-70311017  | 202  | CNOT2    |
| chr7:18762156-18835997   | 0    | HDAC9    |
| chr15:50300788-50309798  | 99   | GABPB1   |
| chr15:50648686-50663046  | 70   | TRPM7    |
| chr22:45689711-45729590  | 33   | ATXN10   |
| chr12:409367-418636      | 30   | CCDC77   |
| chr7:2364371-2366448     | 378  | EIF3B    |

|                          |      |                 |
|--------------------------|------|-----------------|
| chr3:33684358-33696933   | 625  | CLASP2          |
| chr5:97431743-97439618   | 1    | nogene          |
| chr9:134001083-134002160 | 1    | nogene          |
| chr1:202886489-202886860 | 32   | nogene          |
| chr11:62839113-62839659  | 500  | WDR74           |
| chr4:128515856-128519108 | 3    | LOC100507487    |
| chr10:74842599-74843478  | 29   | KAT6B           |
| chr5:43294055-43298975   | 5    | HMGCS1          |
| chr13:23869291-23886506  | 189  | MIPEP           |
| chr20:29091593-29101550  | 0    | FRG1DP          |
| chr16:29904851-29905959  | 281  | ASPHD1          |
| chr1:223954476-223962273 | 209  | GTF2IP20        |
| chr5:16779544-16783469   | 278  | MYO10           |
| chr5:33881118-33881480   | 55   | ADAMTS12        |
| chr7:22291174-22318037   | 702  | RAPGEF5         |
| chr4:129039040-129082373 | 136  | SCLT1           |
| chr6:43478086-43503706   | 21   | TJAP1           |
| chr3:11358417-11380052   | 226  | ATG7            |
| chr4:53383772-53389873   | 54   | FIP1L1          |
| chr2:235797758-235807331 | 131  | AGAP1           |
| chr12:47104112-47108164  | 127  | PCED1B          |
| chr22:24363260-24369320  | 0    | SPECC1L-ADORA2A |
| chr3:125848229-125848447 | 85   | nogene          |
| chr4:186706562-186709845 | 486  | FAT1            |
| chr5:16779544-16780608   | 28   | MYO10           |
| chr1:2055440-2059591     | 82   | PRKCZ           |
| chr20:54157168-54171670  | 216  | CYP24A1         |
| chr7:128641202-128648982 | 191  | LINC01000       |
| chrM:10745-10954         | 91   | nogene          |
| chr14:80756891-80778046  | 53   | CEP128          |
| chr6:31648676-31649627   | 101  | BAG6            |
| chr3:151116337-151127984 | 208  | MED12L          |
| chr10:68393137-68394451  | 317  | RUFY2           |
| chr5:38903881-38904503   | 0    | OSMR            |
| chr19:11120091-11123344  | 38   | LDLR            |
| chr2:241403827-241418109 | 149  | FARP2           |
| chr11:65502320-65504595  | 16   | nogene          |
| chr11:46076753-46084302  | 46   | PHF21A          |
| chr3:196391812-196403019 | 2353 | UBXN7           |
| chr2:72731006-72733118   | 339  | EXOC6B          |
| chr15:49235850-49239367  | 459  | GALK2           |
| chr6:2397220-2399037     | 17   | GMDS-AS1        |
| chr6:57507386-57606457   | 27   | PRIM2           |



|                           |      |              |
|---------------------------|------|--------------|
| chr10:1103601-1105267     | 65   | WDR37        |
| chr2:219174145-219175108  | 0    | CNPPD1       |
| chr19:11120091-11128085   | 13   | LDLR         |
| chrX:24172714-24179770    | 167  | ZFX          |
| chr4:6923372-6967424      | 400  | TBC1D14      |
| chr3:63898398-63913225    | 51   | ATXN7        |
| chr1:93324634-93325895    | 117  | LOC100131564 |
| chr5:179822957-179825226  | 31   | SQSTM1       |
| chr9:21815432-21818202    | 115  | MTAP         |
| chr19:12878381-12878834   | 16   | DNASE2       |
| chr13:112504031-112527484 | 36   | TUBGCP3      |
| chr17:20204332-20205912   | 1305 | SPECC1       |
| chr16:29833732-29834066   | 341  | MVP          |
| chr7:677228-680726        | 120  | PRKAR1B      |
| chr21:15014343-15045323   | 59   | NRIP1        |
| chr7:73686635-73687095    | 313  | WBSCR22      |
| chr2:238433312-238433695  | 149  | ASB1         |
| chr11:93747296-93757465   | 11   | C11orf54     |
| chr3:9750944-9751949      | 112  | OGG1         |
| chr7:155706859-155718443  | 289  | RBM33        |
| chr22:45729424-45740538   | 793  | ATXN10       |
| chr3:143985542-143989837  | 1156 | C3orf58      |
| chr12:51055834-51056502   | 72   | LETMD1       |
| chr4:128466607-128470549  | 4    | LOC100507487 |
| chr2:169606038-169608758  | 3    | PPIG         |
| chr8:69738039-69761875    | 27   | SLCO5A1      |
| chr22:25685169-25704209   | 0    | ADRBK2       |
| chr8:144512391-144512771  | 123  | RECQL4       |
| chr1:94487541-94491247    | 124  | ABCD3        |
| chr8:130152735-130180880  | 2011 | ASAP1        |
| chr12:7403534-7433694     | 443  | CD163L1      |
| chr20:49233305-49233709   | 48   | DDX27        |
| chr1:22078428-22086866    | 520  | CDC42        |
| chr5:109713519-109716264  | 840  | MAN2A1       |
| chr2:134317528-134318739  | 101  | MGAT5        |
| chr10:127125473-127127764 | 172  | DOCK1        |
| chr2:109564365-109565859  | 55   | 10-Sep       |
| chr20:35653527-35659014   | 367  | CPNE1        |
| chr3:142736378-142748460  | 1385 | TRPC1        |
| chr9:125207563-125213522  | 0    | RABEPK       |
| chr11:62781893-62782825   | 58   | TAF6L        |
| chr9:33953284-33996333    | 1    | UBAP2        |
| chr17:82763964-82772507   | 376  | TBCD         |

|                              |      |          |
|------------------------------|------|----------|
| chr1:203707008-203708104     | 4    | ATP2B4   |
| chr3:172247532-172251541     | 690  | FNDC3B   |
| chr16:2757471-2760499        | 8    | SRRM2    |
| chrX:134473358-134493590     | 581  | HPRT1    |
| chr5:132892163-132893118     | 96   | AFF4     |
| chr19:50800677-50801750      | 49   | nogene   |
| chr1:32945513-32946564       | 0    | RNF19B   |
| chr8:102833055-102836390     | 43   | AZIN1    |
| chr13:30280062-30283791      | 1440 | KATNAL1  |
| chr5:66202824-66208992       | 32   | nogene   |
| chr12:27368261-27370230      | 193  | ARNTL2   |
| chr18:62072672-62095950      | 208  | PIGN     |
| chr18:77095367-77105286      | 5    | MBP      |
| chr4:105424195-105453642     | 100  | PPA2     |
| chr22:28629551-28646308      | 28   | TTC28    |
| chr9:83678440-83686155       | 319  | UBQLN1   |
| chr10:125038996-125122868    | 62   | CTBP2    |
| chr2:120127687-120175004     | 84   | EPB41L5  |
| chrX:119406459-119410362     | 117  | SLC25A43 |
| chr7:24641715-24668660       | 48   | MPP6     |
| chr7:74219743-74220734       | 6    | LAT2     |
| chr1:44874677-44897444       | 0    | EIF2B3   |
| chr8:89943252-89947892       | 1    | NBN      |
| chr7:4768414-4770252         | 26   | nogene   |
| chrX:76147252-76148456       | 2    | nogene   |
| chr19:52618935-52635153      | 83   | ZNF83    |
| chr7:24623665-24641868       | 327  | MPP6     |
| chr11:120474559-120477526    | 146  | ARHGEF12 |
| chr3:122703741-122708268     | 33   | PARP14   |
| chr17:45475099-45475726      | 294  | PLEKHM1  |
| chr3:100281741-100283811     | 0    | TBC1D23  |
| chr3:49510418-49510819       | 10   | DAG1     |
| chr19:45025328-45025737      | 428  | RELB     |
| chrX:135942878-135947139     | 4148 | nogene   |
| chr9:137716625-137752408     | 26   | EHMT1    |
| chrUn_GL000195v1:19564-20186 | 0    | nogene   |
| chr13:21374527-21374880      | 47   | nogene   |
| chr9:96458378-96458541       | 62   | HABP4    |
| chr4:189855885-189864786     | 35   | nogene   |
| chr11:66639677-66640123      | 26   | RBM4     |
| chr16:89098590-89102759      | 131  | ACSF3    |
| chr10:7797046-7802854        | 1213 | ATP5C1   |
| chr1:12578717-12579412       | 58   | DHRS3    |

|                          |     |           |
|--------------------------|-----|-----------|
| chr4:142429172-142462726 | 3   | INPP4B    |
| chr6:170543600-170549113 | 487 | PSMB1     |
| chr18:21366026-21384403  | 63  | GREB1L    |
| chr17:44794366-44807469  | 0   | GJC1      |
| chr3:42619019-42632823   | 26  | NKTR      |
| chr16:29905787-29906127  | 731 | ASPHD1    |
| chr7:4737317-4741023     | 27  | FOXK1     |
| chr15:42827927-42840433  | 426 | TTBK2     |
| chr11:65503728-65503931  | 8   | nogene    |
| chr11:36227084-36227430  | 385 | LDLRAD3   |
| chr6:144487547-144493456 | 96  | UTRN      |
| chr2:205172210-205245822 | 28  | PARD3B    |
| chr5:74634683-74636498   | 81  | ENC1      |
| chr1:240294821-240392562 | 33  | FMN2      |
| chr2:69345903-69356557   | 0   | GFPT1     |
| chr1:233346441-233355011 | 62  | KIAA1804  |
| chr1:236011920-236017273 | 26  | NID1      |
| chr11:17988596-18008076  | 295 | SERGEF    |
| chr17:81270524-81271024  | 29  | SLC38A10  |
| chr10:28583398-28590832  | 106 | WAC       |
| chr3:195923885-195929081 | 1   | nogene    |
| chr21:42850040-42863596  | 132 | WDR4      |
| chr4:53425871-53444103   | 370 | FIP1L1    |
| chr1:228309098-228309559 | 0   | OBSCN     |
| chr1:213167857-213176492 | 33  | RPS6KC1   |
| chr10:93381218-93389154  | 257 | MYOF      |
| chr5:14270824-14336727   | 129 | TRIO      |
| chr7:4976300-4989177     | 38  | RNF216P1  |
| chr6:129502604-129558166 | 12  | nogene    |
| chr15:71469376-71469758  | 15  | nogene    |
| chr5:65452132-65473952   | 52  | ADAMTS6   |
| chr5:73840479-73840760   | 270 | ARHGEF28  |
| chr20:33677104-33680416  | 0   | E2F1      |
| chr22:47686199-47687206  | 603 | LOC284930 |
| chr13:41316845-41331369  | 41  | NAA16     |
| chr11:74203727-74204445  | 10  | PPME1     |
| chr4:71236575-71255399   | 200 | SLC4A4    |
| chr13:59833106-59916249  | 25  | DIAPH3    |
| chrX:68274737-68299096   | 73  | OPHN1     |
| chr2:10791794-10797757   | 31  | PDIA6     |
| chr1:32627507-32634792   | 91  | ZBTB80S   |
| chr10:32451591-32453436  | 1   | CCDC7     |
| chr19:11116093-11116998  | 13  | LDLR      |

|                           |      |         |
|---------------------------|------|---------|
| chr20:35801490-35858381   | 47   | PHF20   |
| chr2:152575135-152581049  | 270  | FMNL2   |
| chr12:66529830-66596927   | 25   | GRIP1   |
| chr12:76059797-76074239   | 61   | NAP1L1  |
| chr10:68959805-68960249   | 710  | DDX21   |
| chr3:57890040-57896932    | 43   | SLMAP   |
| chr11:9471301-9474633     | 27   | ZNF143  |
| chr1:167765582-167776166  | 362  | MPZL1   |
| chr2:99449335-99464985    | 174  | REV1    |
| chr12:56666203-56670364   | 152  | PTGES3  |
| chr2:239990073-240007370  | 1008 | NDUFA10 |
| chr3:27404829-27424152    | 0    | SLC4A7  |
| chr15:49225204-49292537   | 114  | GALK2   |
| chr5:157518822-157537991  | 58   | ADAM19  |
| chr14:96833466-96860735   | 1108 | VRK1    |
| chr1:243293090-243308177  | 51   | SDCCAG8 |
| chr1:236038103-236048989  | 24   | NID1    |
| chr2:20297552-20327378    | 5    | PUM2    |
| chr17:59353214-59353526   | 74   | YPEL2   |
| chr22:25661575-25690283   | 24   | ADRBK2  |
| chr10:101624744-101676436 | 93   | FBXW4   |
| chr22:37615671-37615935   | 24   | nogene  |
| chr7:105285693-105297533  | 24   | SRPK2   |
| chr10:48401611-48404981   | 174  | MAPK8   |
| chr7:24620051-24680520    | 84   | MPP6    |
| chr5:109713519-109755456  | 163  | MAN2A1  |
| chr14:86028368-86041833   | 36   | nogene  |
| chr1:103565434-103575540  | 0    | AMY2B   |
| chr17:82893546-82911789   | 114  | TBCD    |
| chr8:123077110-123084340  | 425  | TBC1D31 |
| chr13:30255446-30283791   | 398  | KATNAL1 |
| chr5:16763480-16764396    | 36   | MYO10   |
| chr19:45035733-45036167   | 39   | nogene  |
| chrX:115633999-115643508  | 0    | PLS3    |
| chr11:94799389-94800311   | 146  | AMOTL1  |
| chr3:52643247-52648442    | 0    | PBRM1   |
| chr1:151315572-151316509  | 104  | PI4KB   |
| chr19:38119305-38130772   | 25   | SIPA1L3 |
| chr1:30992389-30995220    | 849  | PUM1    |
| chr5:25542353-25542790    | 3    | nogene  |
| chr14:64442053-64449622   | 41   | MTHFD1  |
| chr20:63442405-63446837   | 25   | KCNQ2   |
| chr19:29657778-29664207   | 0    | nogene  |

|                           |     |              |
|---------------------------|-----|--------------|
| chr3:100295086-100296275  | 0   | TBC1D23      |
| chr2:202292224-202292404  | 85  | nogene       |
| chr3:104764378-104859959  | 1   | nogene       |
| chr1:12253721-12258103    | 27  | VPS13D       |
| chr14:20403376-20406400   | 113 | TEP1         |
| chrX:68052539-68073299    | 28  | OPHN1        |
| chr21:42862281-42876767   | 31  | WDR4         |
| chr6:156901375-156935576  | 14  | ARID1B       |
| chr20:48941198-48953790   | 12  | ARFGEF2      |
| chr10:76036007-76058783   | 56  | C10orf11     |
| chr4:22401430-22402799    | 182 | ADGRA3       |
| chr4:142145839-142193195  | 0   | INPP4B       |
| chr6:56981710-56982198    | 1   | BEND6        |
| chr15:80120327-80131293   | 1   | ZFAND6       |
| chr1:115651276-115664268  | 30  | VANGL1       |
| chr10:57991695-58015971   | 36  | nogene       |
| chr12:104348352-104387984 | 3   | TXNRD1       |
| chr6:129539175-129540542  | 0   | nogene       |
| chr7:66554584-66578727    | 2   | GS1-124K5.11 |
| chrX:129319081-129326008  | 13  | nogene       |
| chr7:92511579-92513967    | 35  | PEX1         |
| chr2:134254261-134270550  | 24  | MGAT5        |
| chr9:127444028-127445249  | 0   | ZNF79        |
| chr11:62634820-62639731   | 0   | GANAB        |
| chr14:73170796-73173707   | 5   | PSEN1        |
| chr5:38990948-39003622    | 208 | RICTOR       |
| chr4:7868621-7872080      | 414 | AFAP1        |
| chr22:27894554-27914347   | 394 | PITPNB       |
| chr2:112074911-112089718  | 3   | TMEM87B      |
| chr1:37693629-37693919    | 23  | nogene       |
| chr2:30910947-30932194    | 23  | GALNT14      |
| chr13:29445578-29487935   | 23  | nogene       |
| chr14:51243855-51247220   | 179 | TMX1         |
| chr6:151348710-151353752  | 23  | AKAP12       |
| chr14:75639351-75641898   | 0   | FLVCR2       |
| chr17:64571797-64586170   | 94  | SMURF2       |
| chr15:34915037-34927138   | 95  | AQR          |
| chrX:148661907-148662768  | 315 | AFF2         |
| chr5:132699170-132703619  | 1   | KIF3A        |
| chr2:131052282-131055695  | 48  | FAM168B      |
| chr3:107710451-107733023  | 50  | BBX          |
| chr1:240257944-240438210  | 8   | FMN2         |
| chr16:69776188-69799295   | 15  | WWP2         |

|                           |      |              |
|---------------------------|------|--------------|
| chr5:180238331-180241155  | 322  | MAPK9        |
| chr1:155415743-155459898  | 101  | ASH1L        |
| chr21:28163601-28228478   | 7    | LOC101927973 |
| chr7:116699070-116700284  | 157  | MET          |
| chr11:110272535-110279756 | 36   | RDX          |
| chr20:36781458-36781947   | 86   | nogene       |
| chr13:30227411-30241086   | 876  | KATNAL1      |
| chr14:49669523-49674427   | 179  | POLE2        |
| chr11:64757778-64758704   | 31   | PYGM         |
| chr17:51263273-51268904   | 579  | UTP18        |
| chr5:133990854-133993018  | 235  | VDAC1        |
| chr17:12081355-12095694   | 180  | MAP2K4       |
| chr4:105424195-105456745  | 425  | PPA2         |
| chr7:94549532-94554575    | 8    | CASD1        |
| chr11:9440454-9442197     | 247  | IPO7         |
| chr3:151116337-151122974  | 57   | MED12L       |
| chr13:23361051-23361520   | 23   | nogene       |
| chr6:30888687-30889430    | 32   | DDR1         |
| chr10:68014025-68044563   | 18   | HERC4        |
| chr3:196885150-196886694  | 281  | SENP5        |
| chr5:179847977-179851424  | 7    | C5orf45      |
| chr12:11839139-11841032   | 24   | ETV6         |
| chr13:30280062-30284383   | 21   | KATNAL1      |
| chr15:67231813-67236820   | 1319 | AAGAB        |
| chr14:105226068-105226760 | 158  | BRF1         |
| chr12:116719762-116723223 | 5    | C12orf49     |
| chr12:132786338-132791293 | 0    | GOLGA3       |
| chr1:151117391-151118139  | 23   | GABPB2       |
| chr3:104817472-104829713  | 8    | nogene       |
| chr11:65434478-65444063   | 49   | nogene       |
| chr6:144537581-144551082  | 0    | UTRN         |
| chr1:155378280-155395553  | 13   | ASH1L        |
| chr12:51745902-51751593   | 27   | SCN8A        |
| chr5:73749836-73780745    | 8    | ARHGEF28     |
| chr13:75560752-75594990   | 1    | UCL3         |
| chr15:41668827-41669958   | 1551 | MGA          |
| chr10:30336802-30341640   | 31   | MTPAP        |
| chr16:23581053-23587319   | 3    | NDUFAB1      |
| chr7:157354505-157367483  | 5    | DNAJB6       |
| chr8:134812609-134813169  | 37   | nogene       |
| chr2:70259359-70261386    | 24   | PCYOX1       |
| chr7:92294888-92362273    | 33   | ANKIB1       |
| chr13:26573714-26642403   | 24   | WASF3        |

|                           |     |           |
|---------------------------|-----|-----------|
| chr14:70988566-71013202   | 36  | PCNX      |
| chr17:37283266-37289528   | 115 | ACACA     |
| chr10:32623718-32625144   | 0   | nogene    |
| chr2:99412730-99435941    | 13  | REV1      |
| chr9:89328659-89328886    | 0   | SECISBP2  |
| chr15:71242648-71256715   | 9   | THSD4     |
| chrX:68046993-68053810    | 362 | OPHN1     |
| chr16:46615945-46618372   | 28  | SHCBP1    |
| chr15:56142777-56179303   | 20  | RFX7      |
| chrX:135545422-135556300  | 130 | DDX26B    |
| chr19:12928341-12928847   | 841 | FARSA     |
| chr11:118554458-118559864 | 40  | IFT46     |
| chr16:87748672-87762040   | 633 | KLHDC4    |
| chr3:149846010-149895560  | 5   | RNF13     |
| chr11:117234266-117246948 | 21  | RNF214    |
| chr17:51020158-51031722   | 8   | SPAG9     |
| chr11:9429673-9433846     | 107 | IPO7      |
| chr3:31576395-31580096    | 521 | STT3B     |
| chr9:96509672-96565483    | 142 | CDC14B    |
| chr13:24484652-24486305   | 3   | PARP4     |
| chr11:107803000-107815965 | 165 | SLC35F2   |
| chr12:7190887-7191700     | 0   | PEX5      |
| chr17:82459991-82472698   | 48  | NARF      |
| chr5:79439009-79457018    | 325 | HOMER1    |
| chr5:154029488-154034967  | 227 | FAM114A2  |
| chr1:240123178-240211235  | 1   | FMN2      |
| chr9:136680936-136681563  | 40  | nogene    |
| chr1:26877990-26878354    | 31  | nogene    |
| chr20:35801490-35847434   | 47  | PHF20     |
| chr19:1147308-1154402     | 196 | SBNO2     |
| chr1:1804418-1825499      | 137 | GNB1      |
| chr3:23208691-23217312    | 4   | UBE2E2    |
| chr15:90439331-90443478   | 232 | IQGAP1    |
| chr20:61997549-62000721   | 21  | TAF4      |
| chr1:19259017-19260012    | 51  | nogene    |
| chr12:71619314-71620315   | 0   | ZFC3H1    |
| chr12:46239678-46243314   | 877 | SLC38A1   |
| chr5:97668550-97670684    | 0   | LINC01340 |
| chr4:153350063-153397333  | 0   | MND1      |
| chr22:37812886-37813609   | 96  | GCAT      |
| chr6:27126314-27127401    | 0   | nogene    |
| chr11:71438403-71440122   | 0   | nogene    |
| chr9:2191265-2192802      | 34  | SMARCA2   |

|                           |      |             |
|---------------------------|------|-------------|
| chr9:20715321-20740340    | 232  | FOCAD       |
| chr18:23507984-23519174   | 0    | C18orf8     |
| chr3:185687056-185689627  | 19   | IGF2BP2     |
| chr2:175979809-175995646  | 145  | KIAA1715    |
| chr10:32805014-32824604   | 17   | CCDC7       |
| chr1:235780864-235782087  | 51   | LYST        |
| chr16:68287745-68291661   | 29   | SLC7A6      |
| chr4:39737419-39777810    | 38   | UBE2K       |
| chr6:41891793-41916939    | 0    | USP49       |
| chr1:52493610-52509712    | 230  | ZCCHC11     |
| chr6:82224067-82231842    | 41   | IBTK        |
| chr2:40428472-40430304    | 1280 | SLC8A1      |
| chr19:45357269-45361642   | 51   | ERCC2       |
| chr9:88426381-88468605    | 29   | SPIN1       |
| chr5:32135571-32143880    | 788  | GOLPH3      |
| chr16:67036638-67066798   | 152  | CBFB        |
| chr8:67103036-67137603    | 21   | CSPP1       |
| chr7:66127703-66134374    | 793  | CRCP        |
| chr1:167749055-167765749  | 1    | MPZL1       |
| chr2:27656082-27656762    | 27   | nogene      |
| chr3:195156448-195226856  | 4    | XXYLT1      |
| chr10:179993-221356       | 415  | ZMYND11     |
| chr20:49023050-49025481   | 0    | ARFGEF2     |
| chr11:123083084-123097952 | 5    | CLMP        |
| chr3:172112451-172133546  | 332  | FNDC3B      |
| chr2:8943186-8962618      | 1    | MBOAT2      |
| chr11:65435052-65444059   | 35   | nogene      |
| chr22:37687909-37688992   | 292  | NOL12       |
| chr1:20757165-20773610    | 435  | HP1BP3      |
| chr22:37496448-37588689   | 766  | CARD10      |
| chr10:12081471-12094271   | 91   | DHTKD1      |
| chr9:20881870-20916937    | 23   | FOCAD       |
| chr1:171568246-171571421  | 25   | PRRC2C      |
| chr10:26934412-26935627   | 13   | LINC00202-1 |
| chr13:75560752-75569507   | 324  | UCHL3       |
| chr11:11327085-11341004   | 81   | GALNT18     |
| chr21:45525816-45532148   | 20   | SLC19A1     |
| chr1:227193785-227213219  | 81   | CDC42BPA    |
| chr2:37316236-37317179    | 354  | PRKD3       |
| chr20:21365420-21368590   | 624  | XRN2        |
| chr7:67055834-67083539    | 165  | TYW1        |
| chr10:96884402-96907747   | 1    | LCOR        |
| chr5:693277-770117        | 2    | TPPP        |



|                           |      |          |
|---------------------------|------|----------|
| chr12:104288930-104327671 | 0    | TXNRD1   |
| chr16:23102318-23108183   | 213  | USP31    |
| chr5:137985256-137988315  | 3447 | FAM13B   |
| chr7:77778337-77780774    | 23   | RSBN1L   |
| chr5:176289653-176290955  | 50   | SIMC1    |
| chr20:17947485-17951595   | 119  | SNX5     |
| chr7:5736015-5736227      | 23   | nogene   |
| chr11:86022366-86031611   | 730  | PICALM   |
| chr1:8541213-8614686      | 308  | RERE     |
| chr20:19990005-19996842   | 89   | RIN2     |
| chr5:133990854-133993015  | 40   | VDAC1    |
| chr5:38523418-38530666    | 259  | LIFR     |
| chr9:91852320-91883383    | 20   | nogene   |
| chr11:17988596-18010139   | 192  | SERGEF   |
| chr8:103401515-103404861  | 32   | SLC25A32 |
| chr17:37179259-37181356   | 28   | ACACA    |
| chr9:137754170-137758011  | 99   | EHMT1    |
| chr10:49915916-49935142   | 337  | PARG     |
| chr12:120557339-120557682 | 28   | RNF10    |
| chr7:140459006-140459936  | 3    | MKRN1    |
| chr8:130152735-130169067  | 1146 | ASAP1    |
| chr14:103003927-103012188 | 445  | CDC42BPB |
| chr7:39997493-40002031    | 234  | CDK13    |
| chr12:69257731-69262562   | 1    | CPSF6    |
| chr12:11839139-11853561   | 11   | ETV6     |
| chr16:70530033-70530414   | 64   | nogene   |
| chr6:43024984-43026141    | 161  | RRP36    |
| chr10:12117672-12120267   | 18   | DHTKD1   |
| chr4:151454700-151458433  | 3    | FAM160A1 |
| chr6:136064380-136071295  | 3    | nogene   |
| chr12:121293199-121294042 | 97   | nogene   |
| chr8:119795531-119797846  | 20   | TAF2     |
| chr12:32305696-32306122   | 91   | BICD1    |
| chr1:39231181-39258028    | 52   | MACF1    |
| chr17:50982523-50985778   | 53   | SPAG9    |
| chr3:142736378-142762313  | 149  | TRPC1    |
| chr18:24366891-24377535   | 99   | OSBPL1A  |
| chr14:89931540-89932627   | 101  | EFCAB11  |
| chr9:40993252-41011730    | 122  | FRG1HP   |
| chr17:37019004-37031685   | 54   | AATF     |
| chr3:27344271-27356904    | 0    | NEK10    |
| chr7:2364371-2367045      | 102  | EIF3B    |
| chr8:67105904-67116122    | 231  | CSPP1    |

|                           |     |              |
|---------------------------|-----|--------------|
| chr1:155216383-155236469  | 89  | GBAP1        |
| chr11:769087-769661       | 146 | nogene       |
| chr17:3818262-3822052     | 21  | C17orf85     |
| chr4:1238182-1241519      | 103 | CTBP1        |
| chr1:212863724-212885396  | 59  | FLVCR1       |
| chr13:23836239-23886506   | 227 | MIPEP        |
| chr10:103439745-103440850 | 126 | PDCD11       |
| chr2:199368604-199433514  | 197 | SATB2        |
| chr4:53145332-53186486    | 20  | SCFD2        |
| chr17:37248010-37253036   | 73  | ACACA        |
| chr6:83398366-83407901    | 548 | ME1          |
| chr18:36501931-36512543   | 42  | FHOD3        |
| chr9:14602717-14680162    | 20  | ZDHHC21      |
| chr19:7981082-7991831     | 20  | ELAVL1       |
| chr9:112078537-112080165  | 33  | SUSD1        |
| chr21:32694227-32695282   | 68  | SYNJ1        |
| chr8:492458-494597        | 112 | TDRP         |
| chr19:46918487-46937408   | 18  | ARHGAP35     |
| chr2:202952558-202955758  | 14  | CARF         |
| chr7:65726770-65734376    | 2   | LOC441242    |
| chr8:53756554-53801896    | 0   | ATP6V1H      |
| chr4:182874569-182915575  | 120 | DCTD         |
| chr1:246726891-246744125  | 30  | SCCPDH       |
| chr2:44209209-44218537    | 92  | PPM1B        |
| chr20:21326278-21368590   | 43  | XRN2         |
| chr12:22484696-22490218   | 24  | C2CD5        |
| chr3:143985542-143989832  | 81  | C3orf58      |
| chr16:53307680-53319951   | 24  | CHD9         |
| chr12:100097364-100103951 | 86  | UHRF1BP1L    |
| chr8:123231299-123239144  | 128 | ZHX1-C8orf76 |
| chr1:154175307-154175914  | 65  | nogene       |
| chr15:78891483-78892313   | 0   | MORF4L1      |
| chr22:27910963-27914347   | 156 | PITPNB       |
| chr15:51781043-51782828   | 45  | TMOD2        |
| chr7:128677563-128680149  | 0   | FAM71F2      |
| chr1:174275832-174394145  | 48  | RABGAP1L     |
| chr14:63998913-64000719   | 9   | SYNE2        |
| chr13:110622215-110627547 | 131 | CARKD        |
| chr14:67685014-67690421   | 42  | RDH11        |
| chr15:32857014-32902040   | 2   | FMN1         |
| chr19:41248513-41248820   | 965 | AXL          |
| chr8:142343965-142345892  | 116 | TSNARE1      |
| chr3:17508473-17586557    | 15  | TBC1D5       |

|                           |      |          |
|---------------------------|------|----------|
| chr12:108658737-108662158 | 77   | CORO1C   |
| chr19:19465339-19465614   | 49   | GATAD2A  |
| chr7:156762133-156763795  | 0    | LMBR1    |
| chr9:100498764-100516771  | 430  | TMEFF1   |
| chr17:28720772-28722882   | 12   | nogene   |
| chr9:88426381-88475513    | 63   | SPIN1    |
| chr11:108235669-108249102 | 24   | ATM      |
| chr5:108959224-109047198  | 0    | FER      |
| chr12:123630168-123630533 | 21   | EIF2B1   |
| chr11:63952237-63952839   | 20   | NAA40    |
| chr4:124641877-124651784  | 4    | nogene   |
| chr1:28459084-28460292    | 10   | PHACTR4  |
| chr15:42260957-42268032   | 184  | TMEM87A  |
| chr7:73465438-73466401    | 28   | BAZ1B    |
| chr1:43359166-43359638    | 41   | CDC20    |
| chr7:105459167-105465414  | 148  | PUS7     |
| chr11:65505186-65505375   | 1    | nogene   |
| chr20:37047052-37068186   | 27   | RBL1     |
| chr22:45689711-45740538   | 176  | ATXN10   |
| chr9:125323797-125326589  | 0    | GAPVD1   |
| chr12:49129499-49186458   | 647  | TUBA1B   |
| chr15:72563393-72570307   | 9    | ARIH1    |
| chr11:63813704-63817959   | 24   | nogene   |
| chr7:24830767-24842413    | 25   | OSBPL3   |
| chr16:47497398-47515601   | 1349 | PHKB     |
| chr8:124508473-124516030  | 73   | TATDN1   |
| chr2:63378385-63571626    | 20   | WDPCP    |
| chr8:93786222-93799758    | 58   | TMEM67   |
| chr2:113444963-113454778  | 23   | CBWD2    |
| chr3:133623090-133624175  | 15   | TOPBP1   |
| chr14:103773612-103797518 | 40   | PPP1R13B |
| chr18:70086612-70128546   | 38   | RTTN     |
| chr1:226265532-226266332  | 34   | LIN9     |
| chr1:31911695-31919658    | 1    | PTP4A2   |
| chr7:102813276-102822203  | 48   | FBXL13   |
| chr2:219146679-219158362  | 1    | NHEJ1    |
| chr4:139116648-139168042  | 1    | nogene   |
| chr4:128074459-128077962  | 325  | LARP1B   |
| chr18:74781427-74890038   | 11   | ZNF407   |
| chr7:6432836-6436533      | 300  | DAGLB    |
| chr19:14458030-14458375   | 174  | PKN1     |
| chr17:39684596-39686019   | 52   | PGAP3    |
| chr14:105252506-105272894 | 153  | BRF1     |

|                           |     |           |
|---------------------------|-----|-----------|
| chr3:172773902-172783909  | 81  | ECT2      |
| chr9:127523678-127531778  | 2   | FAM129B   |
| chr20:1372075-1375603     | 78  | FKBP1A    |
| chr6:83807293-83817736    | 0   | nogene    |
| chr3:123089167-123092442  | 113 | PDIA5     |
| chr22:46231791-46232239   | 4   | PPARA     |
| chr14:52598271-52600341   | 6   | GPR137C   |
| chr17:62524235-62553755   | 19  | TLK2      |
| chr11:18291441-18292019   | 120 | HPS5      |
| chr11:78469246-78571444   | 29  | NARS2     |
| chr19:55047386-55048763   | 46  | RDH13     |
| chr3:10034468-10036339    | 0   | FANCD2    |
| chr10:101797979-101800400 | 0   | MGEA5     |
| chr9:22301599-22308883    | 13  | nogene    |
| chr3:125848229-125857101  | 7   | nogene    |
| chr5:170878096-170896115  | 664 | RANBP17   |
| chr1:178283563-178300118  | 64  | RASAL2    |
| chr9:3330258-3346764      | 82  | RFX3      |
| chr4:1730886-1735834      | 19  | TACC3     |
| chr1:155370503-155395553  | 15  | ASH1L     |
| chr15:65702304-65703008   | 2   | DENND4A   |
| chr1:61899582-61901459    | 4   | INADL     |
| chr20:13483226-13587370   | 20  | TASP1     |
| chr14:57229733-57247712   | 37  | EXOC5     |
| chr4:1311978-1322503      | 53  | MAEA      |
| chr3:123647223-123649194  | 3   | MYLK      |
| chr22:40519463-40522435   | 1   | nogene    |
| chr14:88839451-88861332   | 7   | TTC8      |
| chr1:225167938-225206179  | 10  | DNAH14    |
| chr20:58667489-58673711   | 109 | STX16     |
| chr2:48474687-48491170    | 0   | PPP1R21   |
| chr16:29808229-29808741   | 0   | MAZ       |
| chrX:65075473-65075912    | 374 | nogene    |
| chr6:30034907-30035983    | 153 | ZNRD1-AS1 |
| chr9:7015852-7049200      | 5   | KDM4C     |
| chr1:47335544-47335858    | 69  | nogene    |
| chr4:6923372-6924111      | 425 | TBC1D14   |
| chr6:10400447-10402610    | 6   | TFAP2A    |
| chr7:128842574-128843577  | 20  | FLNC      |
| chr5:68226289-68227009    | 118 | PIK3R1    |
| chr9:85669484-85712566    | 522 | AGTPBP1   |
| chr20:56373407-56388202   | 19  | AURKA     |
| chr12:2820085-2821792     | 110 | ITFG2     |

|                           |     |             |
|---------------------------|-----|-------------|
| chr17:45275390-45275871   | 69  | nogene      |
| chr3:123124065-123124343  | 19  | PDIA5       |
| chr1:231537212-231542611  | 295 | TSNAX-DISC1 |
| chr4:105446382-105456745  | 347 | PPA2        |
| chr6:45422592-45512407    | 41  | RUNX2       |
| chr3:172251259-172251541  | 21  | FNDC3B      |
| chr1:84179176-84214317    | 176 | PRKACB      |
| chr4:79977620-79984863    | 46  | ANTXR2      |
| chr3:148994141-149009402  | 37  | GYG1        |
| chr9:94923985-94979427    | 1   | C9orf3      |
| chr2:15488893-15511350    | 361 | NBAS        |
| chr4:37902002-37902512    | 7   | TBC1D1      |
| chr1:180397515-180413471  | 351 | ACBD6       |
| chr12:125073875-125103081 | 0   | AACS        |
| chr10:70213462-70218817   | 31  | PPA1        |
| chr3:5170502-5174414      | 152 | ARL8B       |
| chr1:50705785-50801677    | 0   | FAF1        |
| chr9:36351114-36353331    | 52  | RNF38       |
| chr6:148471416-148474222  | 1   | SASH1       |
| chr14:30643315-30653588   | 4   | SCFD1       |
| chr4:70762518-70789592    | 19  | RUFY3       |
| chr17:76312869-76313891   | 173 | PRPSAP1     |
| chr12:57533952-57534452   | 42  | DCTN2       |
| chr20:32917300-32931336   | 0   | nogene      |
| chr10:101790895-101791439 | 1   | MGEA5       |
| chr2:173358711-173359491  | 233 | CDCA7       |
| chr1:21050865-21089213    | 375 | EIF4G3      |
| chr17:80325029-80328477   | 6   | RNF213      |
| chr1:77631849-77641655    | 90  | ZZZ3        |
| chr10:3118781-3120044     | 48  | PFKP        |
| chr5:43292473-43298975    | 12  | HMGCS1      |
| chr1:235465635-235484515  | 108 | B3GALNT2    |
| chr11:107433633-107439183 | 29  | CWF19L2     |
| chr5:10377797-10394785    | 35  | 6-Mar       |
| chr1:47368468-47373107    | 56  | CMPK1       |
| chr17:1799856-1801024     | 42  | SMYD4       |
| chr19:41252350-41256611   | 104 | AXL         |
| chr7:66127703-66130842    | 19  | CRCP        |
| chr9:127344234-127345477  | 61  | GARNL3      |
| chr17:36557082-36560871   | 75  | GGNBP2      |
| chr5:102865822-102867393  | 48  | PAM         |
| chr2:99462495-99464985    | 633 | REV1        |
| chr3:39408605-39410999    | 56  | RPSA        |

|                           |      |          |
|---------------------------|------|----------|
| chr7:105285008-105297533  | 151  | SRPK2    |
| chr3:14944673-14944903    | 83   | nogene   |
| chr17:39724725-39725853   | 5    | ERBB2    |
| chr1:231370561-231374099  | 427  | EGLN1    |
| chr16:30924009-30927857   | 19   | nogene   |
| chrM:5209-5368            | 107  | nogene   |
| chr10:121913789-121924329 | 10   | ATE1     |
| chr7:2437803-2443746      | 169  | nogene   |
| chr6:57507386-57537625    | 316  | PRIM2    |
| chr7:74356409-74360278    | 0    | CLIP2    |
| chr16:88027482-88038011   | 1346 | BANP     |
| chr3:15212103-15220981    | 3    | CAPN7    |
| chr15:101235081-101235577 | 1134 | CHSY1    |
| chr1:97679094-97740479    | 36   | DPYD     |
| chr7:18644670-18648683    | 6    | HDAC9    |
| chr16:71927613-71928250   | 0    | IST1     |
| chr3:183643479-183651276  | 24   | KLHL24   |
| chr7:156796388-156826744  | 82   | LMBR1    |
| chr12:49097565-49098105   | 139  | LMBR1L   |
| chr5:109781395-109789527  | 210  | MAN2A1   |
| chr19:17152643-17154415   | 31   | MYO9B    |
| chr8:98249255-98287868    | 21   | nogene   |
| chr5:138555021-138555724  | 146  | nogene   |
| chr19:44903046-44903470   | 43   | nogene   |
| chr3:141278341-141287453  | 40   | PXYLP1   |
| chr17:3026007-3027070     | 51   | RAP1GAP2 |
| chr12:49129241-49185990   | 18   | TUBA1B   |
| chr4:1916870-1918623      | 86   | WHSC1    |
| chr10:27142386-27145590   | 76   | YME1L1   |
| chr13:20891829-20892174   | 19   | nogene   |
| chr6:82957311-83038485    | 28   | UBE3D    |
| chr6:72647931-72648904    | 196  | nogene   |
| chr3:155828181-155842619  | 69   | SLC33A1  |
| chr5:94909250-94912976    | 9    | MCTP1    |
| chr22:37751771-37759264   | 1    | TRIOBP   |
| chr1:215575900-215579137  | 107  | KCTD3    |
| chr17:30843912-30844916   | 20   | ATAD5    |
| chr15:25405460-25415842   | 323  | UBE3A    |
| chr7:24620051-24668660    | 440  | MPP6     |
| chrX:131709497-131794466  | 72   | FIRRE    |
| chr16:56939236-56940245   | 20   | HERPUD1  |
| chr18:7754372-7774271     | 17   | PTPRM    |
| chr3:111112029-111126335  | 217  | PVRL3    |

|                           |      |          |
|---------------------------|------|----------|
| chr4:139060323-139073567  | 48   | ELF2     |
| chr12:1754257-1754514     | 15   | ADIPOR2  |
| chr5:115866669-115913513  | 18   | AP3S1    |
| chr16:346147-347106       | 190  | AXIN1    |
| chrX:108665506-108681888  | 0    | COL4A5   |
| chr1:240206798-240211235  | 364  | FMN2     |
| chr9:122890311-122890545  | 0    | RC3H2    |
| chr17:59737452-59773885   | 19   | VMP1     |
| chr1:227139575-227254155  | 0    | CDC42BPA |
| chr10:125880542-125881071 | 0    | DHX32    |
| chr8:1349416-1349649      | 18   | nogene   |
| chr10:12081471-12101181   | 79   | DHTKD1   |
| chr22:41274599-41281082   | 204  | RANGAP1  |
| chr1:173774304-173775842  | 12   | KLHL20   |
| chr11:61414419-61414998   | 23   | nogene   |
| chr11:59658865-59659469   | 270  | PATL1    |
| chr19:16081912-16101409   | 132  | TPM4     |
| chr16:11886470-11887750   | 18   | GSPT1    |
| chr16:30713207-30713711   | 1    | SRCAP    |
| chr5:146160373-146161564  | 47   | LARS     |
| chr11:29037741-29211765   | 29   | nogene   |
| chr2:11221197-11224460    | 18   | ROCK2    |
| chr3:128795359-128813471  | 33   | RAB7A    |
| chr2:197078702-197090032  | 47   | ANKRD44  |
| chr22:45689711-45702847   | 348  | ATXN10   |
| chr7:18629349-18666476    | 1    | HDAC9    |
| chr8:124512347-124513024  | 21   | nogene   |
| chr9:4823547-4860901      | 29   | RCL1     |
| chr17:80730559-80754185   | 0    | RPTOR    |
| chr19:43747632-43747897   | 0    | SMG9     |
| chr12:111932585-111943369 | 14   | TMEM116  |
| chr5:140700818-140702129  | 0    | ZMAT2    |
| chr6:158580939-158589782  | 596  | TMEM181  |
| chr13:29550203-29560349   | 61   | nogene   |
| chr21:37420298-37421866   | 36   | DYRK1A   |
| chr2:227898181-227907252  | 45   | DAW1     |
| chr1:109210795-109211119  | 18   | nogene   |
| chrX:17473060-17477320    | 34   | nogene   |
| chr7:80789305-80810701    | 1131 | SEMA3C   |
| chr10:50460672-50590247   | 9    | SGMS1    |
| chr1:94458606-94480606    | 54   | ABCD3    |
| chr21:37420298-37430400   | 148  | DYRK1A   |
| chrX:118584734-118590302  | 0    | DOCK11   |

|                           |      |           |
|---------------------------|------|-----------|
| chr15:84637346-84641262   | 49   | SCAND2P   |
| chr2:60768469-60770511    | 8    | PAPOLG    |
| chr14:21357196-21361213   | 248  | SUPT16H   |
| chr1:233054267-233057290  | 50   | PCNXL2    |
| chr7:579255-596304        | 20   | PRKAR1B   |
| chr3:44392854-44396834    | 1    | TCAIM     |
| chr1:1387234-1390865      | 10   | CCNL2     |
| chr21:10338454-10340478   | 6    | nogene    |
| chr16:75603084-75622464   | 34   | ADAT1     |
| chr11:65505301-65505606   | 2    | nogene    |
| chr7:92294888-92371607    | 28   | ANKIB1    |
| chr7:11051611-11062085    | 20   | PHF14     |
| chr12:104019629-104021491 | 46   | GLT8D2    |
| chr3:142743484-142748460  | 0    | TRPC1     |
| chr7:26684735-26690362    | 1    | SKAP2     |
| chr4:77040620-77066405    | 18   | CCNI      |
| chr14:45008912-45027474   | 18   | FAM179B   |
| chr2:26278613-26280115    | 18   | HADHB     |
| chr19:5727267-5739439     | 38   | CATSPERD  |
| chr8:61548070-61556022    | 23   | ASPH      |
| chr17:1636708-1637062     | 2    | SCARF1    |
| chr3:198063717-198072830  | 21   | ANKRD18DP |
| chr13:45207423-45252970   | 23   | GTF2F2    |
| chr1:100049908-100069685  | 214  | HIAT1     |
| chr19:19482367-19483651   | 39   | nogene    |
| chr3:52943352-52969258    | 25   | SFMBT1    |
| chr10:25466650-25572887   | 0    | GPR158    |
| chr10:1084402-1105267     | 169  | WDR37     |
| chr20:47276313-47287284   | 19   | ZMYND8    |
| chr9:137752330-137762820  | 7    | EHMT1     |
| chr14:54966474-54981696   | 43   | WDHD1     |
| chr4:52626017-52631144    | 115  | USP46     |
| chr8:124504270-124523002  | 30   | TATDN1    |
| chr12:111932585-111938210 | 0    | TMEM116   |
| chr19:44429057-44432366   | 6    | ZNF229    |
| chr21:33750142-33761986   | 6    | ITSN1     |
| chr10:97385165-97388624   | 23   | RRP12     |
| chr8:120453846-120461255  | 103  | MTBP      |
| chr11:107510886-107532406 | 36   | ALKBH8    |
| chr9:125543058-125585727  | 1    | MAPKAP1   |
| chr2:106112645-106129778  | 23   | UXS1      |
| chr3:146121111-146124229  | 2342 | PLOD2     |
| chr6:87215902-87216377    | 0    | ZNF292    |



|                          |     |                 |
|--------------------------|-----|-----------------|
| chr7:141636959-141641908 | 21  | AGK             |
| chr4:80287336-80301716   | 5   | nogene          |
| chr1:145747994-145771919 | 2   | RNF115          |
| chr3:182884752-182887713 | 10  | ATP11B          |
| chrX:2408744-2425304     | 78  | DHR SX          |
| chr7:22455179-22455879   | 259 | nogene          |
| chr10:67992198-68014186  | 14  | HERC4           |
| chr1:32798170-32798589   | 21  | nogene          |
| chr19:2271384-2273160    | 0   | OAZ1            |
| chr14:54748814-54764540  | 47  | SAMD4A          |
| chr5:78020691-78101025   | 23  | AP3B1           |
| chr1:235470849-235494828 | 198 | B3GALNT2        |
| chr14:20325538-20329373  | 116 | CCNB1IP1        |
| chr1:26446315-26447660   | 305 | DHDDS           |
| chr14:50267752-50303017  | 25  | L2HGDH          |
| chrX:152553158-152554491 | 0   | nogene          |
| chr14:73249983-73255018  | 15  | PAPLN           |
| chr13:32648753-32652007  | 85  | PDS5B           |
| chr20:9337125-9339037    | 219 | PLCB4           |
| chr1:162576776-162581459 | 72  | UAP1            |
| chr2:61178980-61186497   | 33  | AHSA2           |
| chr18:59466738-59480238  | 28  | CCBE1           |
| chr18:12353004-12356831  | 65  | AFG3L2          |
| chr5:140485588-140505869 | 25  | ANKHD1-EIF4EBP3 |
| chr3:32708669-32727870   | 0   | CNOT10          |
| chr20:49067189-49072697  | 23  | CSE1L           |
| chr7:92123119-92131872   | 117 | CYP51A1         |
| chr7:158773340-158793726 | 1   | ESYT2           |
| chr1:59321535-59457076   | 21  | FGGY            |
| chr6:83346172-83407901   | 93  | ME1             |
| chr16:75232426-75233128  | 24  | nogene          |
| chr11:59639047-59643035  | 24  | PATL1           |
| chr19:40783777-40786978  | 1   | RAB4B-EGLN2     |
| chr14:67761365-67762819  | 10  | ZFYVE26         |
| chr5:69269206-69277226   | 0   | CDK7            |
| chr3:37017505-37028932   | 20  | MLH1            |
| chr15:57282444-57292046  | 20  | TCF12           |
| chr6:118511297-118566316 | 93  | CEP85L          |
| chr2:29133654-29145367   | 61  | CLIP4           |
| chr12:1083163-1116033    | 0   | ERC1            |
| chr17:15503097-15506986  | 8   | nogene          |
| chr19:47677603-47678210  | 33  | nogene          |
| chr14:30670255-30675065  | 298 | SCFD1           |

|                           |     |         |
|---------------------------|-----|---------|
| chr18:58709377-58715967   | 18  | MALT1   |
| chr10:32908367-32910455   | 143 | ITGB1   |
| chr13:23365165-23371165   | 345 | SACS    |
| chr9:96320997-96324169    | 15  | SLC35D2 |
| chr16:18874220-18874831   | 48  | nogene  |
| chr7:93862514-93862717    | 0   | nogene  |
| chr15:49225204-49308777   | 39  | nogene  |
| chr20:35801490-35863400   | 5   | PHF20   |
| chr1:246999347-247000074  | 57  | ZNF695  |
| chr10:17688026-17696869   | 24  | STAM    |
| chr10:72152868-72213331   | 0   | ASCC1   |
| chr4:77056248-77066405    | 26  | CCNI    |
| chr6:158583953-158589782  | 652 | TMEM181 |
| chr12:56603358-56605327   | 65  | BAZ2A   |
| chr20:30388452-30393655   | 27  | FRG1BP  |
| chr8:33453215-33461725    | 32  | FUT10   |
| chr15:87406362-87422036   | 18  | nogene  |
| chr10:26704676-26705394   | 18  | PDSS1   |
| chr16:18782780-18788142   | 55  | RPS15A  |
| chr6:42603587-42606651    | 284 | UBR2    |
| chr5:132883339-132885119  | 53  | AFF4    |
| chr2:72731006-72741469    | 10  | EXOC6B  |
| chr12:26722396-26725765   | 0   | ITPR2   |
| chr6:17771907-17783701    | 20  | KIF13A  |
| chr6:98899267-98917719    | 0   | FBXL4   |
| chr6:100715461-100805880  | 20  | ASCC3   |
| chr12:14436105-14447053   | 20  | ATF7IP  |
| chr10:86838864-86876085   | 205 | BMPR1A  |
| chr1:113908008-113908191  | 3   | DCLRE1B |
| chr2:72559452-72575668    | 49  | EXOC6B  |
| chr9:41008880-41011730    | 62  | FRG1HP  |
| chr10:863742-885760       | 182 | LARP4B  |
| chr6:149826263-149853160  | 86  | LRP11   |
| chr2:31917925-31943383    | 211 | MEMO1   |
| chr3:52739428-52741499    | 34  | NEK4    |
| chr20:35690412-35698590   | 0   | NFS1    |
| chr6:42888899-42889227    | 65  | nogene  |
| chr15:100819413-100832074 | 0   | nogene  |
| chr9:20582456-20586817    | 0   | nogene  |
| chrX:68096869-68194498    | 5   | OPHN1   |
| chr6:36515337-36521817    | 2   | STK38   |
| chr4:153292981-153296036  | 6   | TRIM2   |
| chr16:3308312-3308836     | 7   | ZNF75A  |

|                          |     |           |
|--------------------------|-----|-----------|
| chr4:139388509-139389132 | 18  | nogene    |
| chrX:24065997-24068108   | 2   | EIF2S3    |
| chr13:29514352-29524253  | 46  | SLC7A1    |
| chr9:134727265-134732127 | 20  | COL5A1    |
| chr1:211787631-211793190 | 18  | LPGAT1    |
| chr8:47407860-47440542   | 145 | SPIDR     |
| chr3:52743351-52766375   | 19  | NEK4      |
| chr11:18564891-18578808  | 40  | UEVLD     |
| chr20:34408650-34413879  | 18  | ITCH      |
| chr13:30283615-30283791  | 202 | KATNAL1   |
| chr11:61902441-61904882  | 53  | RAB3IL1   |
| chr8:47291032-47294030   | 134 | SPIDR     |
| chr18:59466738-59469607  | 60  | CCBE1     |
| chr2:60786946-60787620   | 17  | PAPOLG    |
| chr16:84740308-84745673  | 569 | USP10     |
| chr4:110105496-110198367 | 0   | ELOVL6    |
| chr7:24623662-24641868   | 163 | MPP6      |
| chr3:65974452-65976174   | 0   | nogene    |
| chr20:51349940-51396876  | 17  | nogene    |
| chr7:66427948-66439304   | 127 | nogene    |
| chr1:1223243-1223968     | 734 | SDF4      |
| chr17:4282797-4296814    | 310 | UBE2G1    |
| chr2:96733518-96734526   | 8   | LMAN2L    |
| chr12:6730401-6730820    | 4   | COPS7A    |
| chr5:175492094-175526793 | 0   | SFXN1     |
| chr8:70594505-70598255   | 3   | TRAM1     |
| chr14:34551713-34554912  | 114 | nogene    |
| chr1:94487541-94506642   | 0   | ABCD3     |
| chr11:70337364-70339306  | 20  | PPFIA1    |
| chr7:851383-853618       | 0   | SUN1      |
| chr10:74314666-74398579  | 98  | ADK       |
| chr11:9287701-9295387    | 6   | TMEM41B   |
| chr13:19959957-20036909  | 28  | ZMYM2     |
| chr9:109050282-109050692 | 185 | TMEM245   |
| chr12:6869257-6869773    | 97  | TPI1      |
| chr1:54875092-54876047   | 4   | DHCR24    |
| chr7:135636330-135645018 | 50  | NUP205    |
| chr19:49844315-49844892  | 9   | PTOV1-AS1 |
| chr10:63566337-63599283  | 1   | REEP3     |
| chr5:179560024-179577136 | 20  | RUFY1     |
| chr15:67164894-67170604  | 114 | SMAD3     |
| chr16:74457873-74459789  | 73  | GLG1      |
| chr8:79917977-79919148   | 30  | MRPS28    |

|                          |     |              |
|--------------------------|-----|--------------|
| chr5:95755395-95788858   | 0   | RHOBTB3      |
| chr8:134509618-134521001 | 102 | ZFAT         |
| chr14:74669648-74671483  | 104 | AREL1        |
| chr1:243512323-243573048 | 5   | AKT3         |
| chr16:74353776-74360891  | 60  | LOC283922    |
| chr7:50669721-50756056   | 38  | GRB10        |
| chr7:66155767-66156065   | 29  | nogene       |
| chr6:34237203-34243518   | 18  | HMGA1        |
| chr7:22266963-22318037   | 172 | RAPGEF5      |
| chr6:99503764-99510230   | 110 | USP45        |
| chr10:32451591-32481782  | 100 | CCDC7        |
| chr18:10534465-10550254  | 0   | NAPG         |
| chr3:104817472-104859959 | 104 | nogene       |
| chr1:155438326-155439068 | 410 | ASH1L        |
| chr21:22041219-22096586  | 14  | LOC101927843 |
| chr9:96774787-96776245   | 35  | ZNF510       |
| chr2:32414768-32416163   | 30  | BIRC6        |
| chr15:28265617-28280287  | 17  | HERC2        |
| chr10:13127744-13136897  | 73  | OPTN         |
| chr4:120754552-120785091 | 0   | PRDM5        |
| chr17:18330554-18348440  | 5   | SHMT1        |
| chr3:192727180-192738983 | 18  | FGF12        |
| chr1:225167938-225207220 | 1   | DNAH14       |
| chr16:58722118-58723902  | 1   | GOT2         |
| chr3:4445496-4453049     | 13  | SUMF1        |
| chr21:17594053-17609152  | 18  | BTG3         |
| chr1:44753254-44753699   | 19  | KIF2C        |
| chr1:58714831-58718748   | 104 | nogene       |
| chr2:86065273-86081706   | 27  | POLR1A       |
| chr12:64016949-64043575  | 17  | SRGAP1       |
| chr15:65700543-65701890  | 3   | DENND4A      |
| chr8:41974703-41978777   | 28  | KAT6A        |
| chr6:34821652-34821955   | 3   | UHRF1BP1     |
| chr21:36247516-36248568  | 358 | DOPEY2       |
| chr7:50674435-50703908   | 17  | GRB10        |
| chr9:105721536-105722621 | 145 | TMEM38B      |
| chr16:2075798-2080377    | 107 | TSC2         |
| chr1:35405022-35408159   | 21  | ZMYM4        |
| chr2:75670137-75672016   | 11  | GCFC2        |
| chr22:25375812-25381578  | 454 | LRP5L        |
| chr7:6418963-6419876     | 21  | nogene       |
| chr5:179560024-179569425 | 20  | RUFY1        |
| chr4:142305457-142403054 | 0   | INPP4B       |

|                          |      |          |
|--------------------------|------|----------|
| chr2:208345110-208348023 | 28   | PIKFYVE  |
| chr19:50398850-50399484  | 328  | POLD1    |
| chr17:39490556-39509761  | 0    | CDK12    |
| chr14:45246742-45247377  | 17   | MIS18BP1 |
| chr2:238275742-238277955 | 33   | PER2     |
| chr20:63672555-63674093  | 80   | RTEL1    |
| chr16:98144-100509       | 99   | NPRL3    |
| chr21:39224407-39229436  | 40   | BRWD1    |
| chr1:61990167-62051058   | 23   | INADL    |
| chr8:127851933-127890998 | 17   | PVT1     |
| chr19:14177530-14189689  | 20   | ADGRL1   |
| chr2:86541116-86542312   | 11   | CHMP3    |
| chr19:40733159-40733364  | 2    | ITPKC    |
| chr8:118016806-118072777 | 20   | no gene  |
| chr2:202275112-202284481 | 28   | NOP58    |
| chr10:77982153-77984298  | 45   | POLR3A   |
| chr6:130175840-130216616 | 2    | SAMD3    |
| chr7:85036888-85068284   | 57   | SEMA3D   |
| chr8:73688653-73688813   | 20   | STAU2    |
| chr22:37768073-37769375  | 0    | TRIOBP   |
| chr4:176708968-176729746 | 34   | VEGFC    |
| chr20:63775677-63790790  | 1215 | ZBTB46   |
| chr15:80098415-80121820  | 26   | ZFAND6   |
| chr19:13808835-13809237  | 0    | ZSWIM4   |
| chr12:1115865-1190052    | 28   | ERC1     |
| chr3:38183002-38198863   | 42   | OXSR1    |
| chr19:40583397-40583717  | 91   | SHKBP1   |
| chr18:68836748-68874785  | 7    | CCDC102B |
| chr3:172226870-172251541 | 100  | FNDC3B   |
| chr6:154773988-154795139 | 366  | SCAF8    |
| chr6:47503279-47504758   | 249  | CD2AP    |
| chr17:2701612-2702057    | 19   | CLUH     |
| chr5:131698916-131709272 | 62   | FNIP1    |
| chr4:150435588-150436864 | 21   | LRBA     |
| chr9:132013163-132014467 | 4    | MED27    |
| chr12:77940318-78059115  | 65   | NAV3     |
| chr20:36665045-36682578  | 31   | NDRG3    |
| chr1:10403070-10408140   | 21   | PGD      |
| chr14:88574692-88575940  | 21   | ZC3H14   |
| chr16:53873785-53888951  | 654  | FTO      |
| chr6:80200933-80203212   | 34   | BCKDHB   |
| chr4:113174415-113199109 | 35   | ANK2     |
| chr10:12081471-12084751  | 31   | DHTKD1   |

|                          |     |          |
|--------------------------|-----|----------|
| chr16:57797704-57798022  | 9   | KIFC3    |
| chr3:126727077-126733222 | 154 | CHCHD6   |
| chr8:123077110-123109620 | 265 | TBC1D31  |
| chr5:153997802-154002969 | 26  | FAM114A2 |
| chr9:36369718-36390616   | 5   | RNF38    |
| chr7:83466481-83490274   | 7   | SEMA3E   |
| chr22:31589446-31602785  | 0   | SFI1     |
| chr17:79077429-79077864  | 239 | ENGASE   |
| chr11:3705199-3712728    | 0   | NUP98    |
| chr2:171925536-171953001 | 499 | HAT1     |
| chrX:53406967-53408091   | 17  | nogene   |
| chr17:6525355-6590630    | 20  | PITPNM3  |
| chr2:189791789-189818180 | 472 | PMS1     |
| chr9:22451063-22467906   | 2   | DMRTA1   |
| chr13:24249476-24257409  | 49  | SPATA13  |
| chr2:29121373-29167540   | 27  | CLIP4    |
| chr5:139600371-139623461 | 48  | UBE2D2   |
| chr9:124971369-124976186 | 19  | SCAI     |
| chr16:11894953-11898035  | 191 | GSPT1    |
| chr16:53314376-53315044  | 6   | CHD9     |
| chr20:49066191-49070297  | 72  | CSE1L    |
| chr4:186639721-186663613 | 20  | FAT1     |
| chr7:155301565-155302846 | 0   | INSIG1   |
| chr6:136694139-136720589 | 37  | MAP3K5   |
| chr15:55223888-55234956  | 104 | RAB27A   |
| chr2:226864603-226914351 | 339 | RHBDD1   |
| chr4:139523353-139529220 | 1   | SETD7    |
| chr4:7004843-7014557     | 46  | TBC1D14  |
| chr21:42850040-42859722  | 164 | WDR4     |
| chr9:3484973-3490345     | 3   | RFX3     |
| chr13:49921477-49928085  | 0   | SPRYD7   |
| chr20:44978442-44997306  | 38  | STK4     |
| chr2:28906459-28914208   | 194 | WDR43    |
| chr2:175111567-175121540 | 229 | ATF2     |
| chr11:78196235-78200808  | 0   | USP35    |
| chr18:21621075-21621672  | 26  | nogene   |
| chr8:109271004-109281172 | 17  | NUDCD1   |
| chr6:18236451-18237516   | 118 | DEK      |
| chr5:171390050-171392978 | 140 | NPM1     |
| chr1:173941264-173943615 | 12  | RC3H1    |
| chr16:29895258-29895860  | 241 | SEZ6L2   |
| chr2:106122969-106129778 | 96  | UXS1     |
| chr10:37729820-37749758  | 67  | nogene   |

|                          |      |          |
|--------------------------|------|----------|
| chr1:5967298-5969259     | 0    | NPHP4    |
| chr1:224952669-224974153 | 1000 | DNAH14   |
| chr5:131395562-131417177 | 2    | nogene   |
| chr8:140617537-140618050 | 34   | nogene   |
| chr10:12172764-12173813  | 19   | NUDT5    |
| chr18:54271359-54287411  | 47   | POLI     |
| chr12:98527885-98546447  | 20   | TMPO     |
| chr2:178591138-178600667 | 139  | TTN-AS1  |
| chr1:12290997-12308641   | 0    | VPS13D   |
| chr9:34096715-34098517   | 14   | DCAF12   |
| chr14:54984722-55002185  | 39   | WDHD1    |
| chr19:19640084-19640571  | 78   | GMIP     |
| chr17:42500706-42501304  | 92   | ATP6V0A1 |
| chr7:35010467-35018596   | 89   | DPY19L1  |
| chr3:172760160-172783909 | 57   | ECT2     |
| chr17:64571797-64583544  | 29   | SMURF2   |
| chr3:43299753-43303792   | 72   | SNRK     |
| chr2:148021647-148342336 | 21   | MBD5     |
| chr8:127989161-128010444 | 169  | PVT1     |
| chr15:76665652-76680226  | 0    | SCAPER   |
| chr3:12379703-12392752   | 0    | PPARG    |
| chr11:78465875-78493195  | 242  | NARS2    |
| chr3:27322176-27356904   | 0    | NEK10    |
| chr18:12999420-13017336  | 0    | CEP192   |
| chr7:29923955-29969068   | 24   | SCRN1    |
| chr12:7403534-7406852    | 1    | CD163L1  |
| chr6:44932652-44954607   | 28   | SUPT3H   |
| chr7:27629370-27632445   | 220  | HIBADH   |
| chr13:50927406-50949505  | 207  | RNASEH2B |
| chr6:157896826-157910025 | 29   | SNX9     |
| chr19:16081912-16086540  | 121  | TPM4     |
| chr17:51263273-51273450  | 11   | UTP18    |
| chr8:42352981-42353203   | 48   | nogene   |
| chr7:74689123-74700634   | 0    | GTF2I    |
| chr15:90466000-90467592  | 6    | IQGAP1   |
| chr1:154170399-154176248 | 5    | TPM3     |
| chr5:126804775-126832801 | 55   | LMNB1    |
| chr14:70988569-70995925  | 11   | PCNX     |
| chr6:121255327-121256285 | 1    | TBC1D32  |
| chr12:50427761-50441643  | 90   | LARP4    |
| chr6:84556018-84602487   | 2    | nogene   |
| chr12:24829822-24836596  | 57   | BCAT1    |
| chr10:26705285-26720359  | 19   | PDSS1    |

|                           |     |          |
|---------------------------|-----|----------|
| chr7:130201849-130204110  | 52  | TMEM209  |
| chr1:15534236-15567269    | 1   | DNAJC16  |
| chr3:161234726-161238826  | 27  | NMD3     |
| chr2:231206197-231208252  | 0   | ARMC9    |
| chr8:61637946-61644632    | 2   | ASPH     |
| chr3:189207375-189238909  | 24  | TPRG1    |
| chr1:66891153-66905375    | 81  | WDR78    |
| chr15:100973803-100989398 | 1   | LRRK1    |
| chr5:32390274-32400203    | 0   | ZFR      |
| chr15:41696074-41699159   | 467 | MGA      |
| chr10:113898109-113908523 | 28  | NHLRC2   |
| chr18:32111753-32126800   | 131 | RNF138   |
| chr6:85572136-85574378    | 1   | SNX14    |
| chr2:175979809-175994280  | 36  | KIAA1715 |
| chr11:76976288-76998821   | 19  | ACER3    |
| chr12:31442774-31447769   | 132 | DENND5B  |
| chr18:36730645-36747135   | 27  | FHOD3    |
| chr2:10671553-10684612    | 19  | NOL10    |
| chr16:11846500-11847806   | 372 | RSL1D1   |
| chr17:64519320-64526200   | 3   | CEP95    |
| chr1:23030468-23059167    | 120 | KDM1A    |
| chr1:214390987-214398001  | 0   | PTPN14   |
| chrX:71381742-71387461    | 114 | TAF1     |
| chr5:171398051-171398493  | 20  | nogene   |
| chr7:155665174-155678684  | 16  | RBM33    |
| chr6:34606554-34606904    | 148 | C6orf106 |
| chr17:19542392-19548133   | 64  | SLC47A1  |
| chr8:104068511-104148848  | 57  | nogene   |
| chr12:132747831-132755133 | 41  | ANKLE2   |
| chr4:150102477-150102812  | 186 | DCLK2    |
| chr22:19383619-19410778   | 17  | HIRA     |
| chr18:24440495-24445466   | 0   | IMPACT   |
| chr4:41605893-41619440    | 29  | LIMCH1   |
| chr5:170881805-170896115  | 17  | RANBP17  |
| chr2:175947479-175979868  | 19  | KIAA1715 |
| chr17:50723856-50724305   | 17  | nogene   |
| chr8:73673106-73688813    | 515 | STAU2    |
| chr15:61015797-61094611   | 34  | nogene   |
| chr2:233388256-233390483  | 256 | DGKD     |
| chr18:9208656-9221999     | 86  | ANKRD12  |
| chr2:229477139-229547092  | 17  | DNER     |
| chr22:45330602-45332710   | 16  | FAM118A  |
| chr1:153751094-153757763  | 67  | INTS3    |



|                           |     |          |
|---------------------------|-----|----------|
| chr20:43702489-43702903   | 38  | MYBL2    |
| chr7:5389754-5390115      | 16  | nogene   |
| chr2:10124716-10129154    | 17  | RRM2     |
| chr2:43963587-43975217    | 85  | LRPPRC   |
| chr6:143765260-143765798  | 31  | PHACTR2  |
| chr9:89065528-89077903    | 2   | SHC3     |
| chr7:7877280-7889229      | 10  | UMAD1    |
| chr14:31066125-31072973   | 172 | AP4S1    |
| chr7:129857510-129880971  | 30  | UBE2H    |
| chr17:15977799-15987368   | 0   | ZSWIM7   |
| chr2:148178699-148233395  | 36  | MBD5     |
| chr17:54912665-54915862   | 59  | TOM1L1   |
| chr7:64691247-64691960    | 19  | ZNF107   |
| chr12:40028300-40048210   | 214 | SLC2A13  |
| chr16:533945-536142       | 179 | CAPN15   |
| chr16:48546146-48553669   | 19  | N4BP1    |
| chr15:56960660-56960903   | 17  | nogene   |
| chr5:175940443-175961434  | 291 | THOC3    |
| chr10:97656284-97664984   | 7   | PI4K2A   |
| chr11:64193077-64203622   | 8   | STIP1    |
| chr15:34084208-34088133   | 17  | EMC7     |
| chr9:83343189-83389708    | 16  | FRMD3    |
| chr8:47852672-47855373    | 51  | PRKDC    |
| chr7:44013592-44016523    | 26  | POLR2J4  |
| chr10:69185986-69187756   | 91  | SUPV3L1  |
| chr7:47396799-47415206    | 16  | TNS3     |
| chr5:150942217-150993760  | 1   | ZNF300P1 |
| chr16:85264477-85265058   | 45  | nogene   |
| chr20:2886289-2965202     | 25  | PTPRA    |
| chr10:68142939-68150111   | 380 | MYPN     |
| chr5:138947404-138951884  | 54  | SIL1     |
| chr11:120475339-120477526 | 24  | ARHGEF12 |
| chr6:3410187-3415855      | 8   | SLC22A23 |
| chr18:48757918-48817376   | 0   | CTIF     |
| chr12:48063709-48089293   | 0   | SENP1    |
| chr1:233246426-233252788  | 25  | PCNXL2   |
| chr18:46215810-46216595   | 70  | C18orf25 |
| chr1:240257944-240355908  | 90  | FMN2     |
| chr2:232722553-232724691  | 51  | GIGYF2   |
| chr3:179690240-179708957  | 86  | USP13    |
| chr20:38497352-38509208   | 40  | RALGAPB  |
| chr2:178540106-178542361  | 13  | TTN-AS1  |
| chr2:175111567-175136486  | 0   | ATF2     |

|                           |     |         |
|---------------------------|-----|---------|
| chr10:37744214-37749758   | 25  | nogene  |
| chr6:56670640-56735289    | 26  | DST     |
| chr4:2655027-2672372      | 19  | FAM193A |
| chr6:145686121-145721155  | 0   | EPM2A   |
| chr5:163513554-163517674  | 11  | MAT2B   |
| chr12:112039228-112049611 | 21  | NAA25   |
| chr5:97220955-97229457    | 19  | nogene  |
| chr8:98133948-98134659    | 32  | POP1    |
| chr12:40028300-40100089   | 16  | SLC2A13 |
| chr3:196053417-196077122  | 45  | TFRC    |
| chr6:144426286-144429741  | 16  | UTRN    |
| chr9:37126311-37304313    | 1   | ZCCHC7  |
| chr5:42687514-42700002    | 16  | GHR     |
| chr2:186625472-186633374  | 0   | ITGAV   |
| chr7:1687915-1688150      | 17  | nogene  |
| chr1:241506002-241508785  | 25  | FH      |
| chr1:153818790-153819735  | 92  | GATAD2B |
| chr7:105038125-105041023  | 162 | KMT2E   |
| chr5:10414432-10417404    | 53  | 6-Mar   |
| chr12:116236820-116237705 | 113 | MED13L  |
| chr18:21765771-21791557   | 132 | MIB1    |
| chr11:19832483-19892594   | 28  | NAV2    |
| chr2:190514452-190525378  | 23  | NEMP2   |
| chr4:124609508-124651784  | 0   | nogene  |
| chr2:158533179-158625427  | 23  | PKP4    |
| chr2:55581566-55604076    | 1   | PPP4R3B |
| chr15:43146492-43154831   | 1   | TMEM62  |
| chr10:5773841-5800705     | 833 | GDI2    |
| chr2:11765532-11773745    | 9   | LPIN1   |
| chr20:47262287-47290274   | 2   | ZMYND8  |
| chr10:94030682-94032252   | 26  | PLCE1   |
| chr2:9344531-9374944      | 28  | ASAP2   |
| chr17:47612459-47619164   | 0   | NPEPPS  |
| chr11:77683709-77693611   | 393 | RSF1    |
| chr7:66993216-66993417    | 4   | SBDS    |
| chr7:117099761-117138532  | 7   | ST7     |
| chr1:186893010-186911389  | 25  | PLA2G4A |
| chrX:2612149-2615969      | 24  | CD99P1  |
| chr4:142305457-142462726  | 0   | INPP4B  |
| chr3:146034531-146035473  | 4   | nogene  |
| chr6:85565331-85574378    | 48  | SNX14   |
| chr6:42663257-42666245    | 52  | UBR2    |
| chr15:42827927-42878684   | 29  | TTBK2   |

|                           |     |           |
|---------------------------|-----|-----------|
| chr2:73419122-73426553    | 47  | ALMS1     |
| chrX:131749305-131785258  | 191 | FIRRE     |
| chr3:20071583-20072459    | 38  | KAT2B     |
| chr12:119803205-119850275 | 24  | CIT       |
| chr14:30580863-30581116   | 18  | G2E3      |
| chr19:18878929-18893575   | 18  | GDF1      |
| chr4:127794076-127798709  | 24  | HSPA4L    |
| chr3:47678197-47693300    | 1   | SMARCC1   |
| chr3:136377659-136423044  | 54  | STAG1     |
| chr19:48981529-48982837   | 19  | GYS1      |
| chr1:30980061-30982640    | 1   | PUM1      |
| chr16:15620450-15623123   | 2   | KIAA0430  |
| chr5:172932435-172935310  | 197 | ERGIC1    |
| chr21:43630321-43644392   | 74  | HSF2BP    |
| chr6:38061592-38082457    | 9   | ZFAND3    |
| chr1:184732836-184737711  | 5   | EDEM3     |
| chr1:28035543-28042650    | 38  | EYA3      |
| chr1:42278347-42323827    | 33  | FOXJ3     |
| chr15:63698727-63716473   | 16  | HERC1     |
| chr6:167864550-167880517  | 39  | MLLT4     |
| chr10:124973644-124974398 | 2   | ZRANB1    |
| chr13:23756544-23886506   | 34  | MIPEP     |
| chr17:2414394-2415954     | 29  | LOC284009 |
| chr5:37125243-37148268    | 1   | C5orf42   |
| chr3:179701007-179708957  | 77  | USP13     |
| chr12:1180539-1190052     | 49  | ERC1      |
| chr16:56328630-56336860   | 16  | GNAO1     |
| chr11:110241595-110242205 | 19  | nogene    |
| chr6:2779262-2784403      | 56  | WRNIP1    |
| chr1:230954332-230961303  | 257 | TTC13     |
| chr8:123023712-123030716  | 43  | DERL1     |
| chr4:150761782-150817257  | 41  | LRBA      |
| chr1:154225083-154228725  | 4   | UBAP2L    |
| chr17:64551583-64571956   | 23  | SMURF2    |
| chr20:34440154-34471515   | 0   | ITCH      |
| chr1:224952669-225023865  | 14  | DNAH14    |
| chr1:151638887-151639119  | 186 | SNX27     |
| chr9:111530874-111534353  | 2   | ZNF483    |
| chr3:121498476-121498670  | 1   | POLQ      |
| chr1:109336239-109345881  | 6   | SORT1     |
| chr5:179594865-179596681  | 30  | RUFY1     |
| chr18:54271359-54274090   | 85  | POLI      |
| chr6:151417278-151436554  | 0   | RMND1     |

|                           |      |          |
|---------------------------|------|----------|
| chr18:216485-224179       | 28   | THOC1    |
| chr19:52040487-52047060   | 31   | ZNF432   |
| chr6:56101471-56141983    | 0    | COL21A1  |
| chr12:108652271-108654410 | 1912 | CORO1C   |
| chr7:158773340-158798076  | 0    | ESYT2    |
| chr10:5730486-5731203     | 1    | FAM208B  |
| chr17:75543396-75551404   | 1    | LLGL2    |
| chr10:87878925-87933251   | 26   | PTEN     |
| chr1:30964673-30964910    | 0    | PUM1     |
| chr13:100625534-100670569 | 0    | TMTC4    |
| chr3:142748257-142777763  | 18   | TRPC1    |
| chr3:196368027-196393619  | 1    | UBXN7    |
| chr17:51268836-51280479   | 38   | UTP18    |
| chr5:353729-376716        | 97   | AHRR     |
| chr18:8076454-8143779     | 106  | PTPRM    |
| chr6:109451599-109452615  | 1    | MICAL1   |
| chr5:119525215-119531404  | 16   | HSD17B4  |
| chr20:25418104-25425327   | 40   | GIN51    |
| chr4:150588047-150599131  | 35   | LRBA     |
| chr6:57507386-57601219    | 16   | PRIM2    |
| chr4:66365503-66370916    | 0    | nogene   |
| chr16:29833732-29835798   | 29   | MVP      |
| chr1:162799742-162805492  | 0    | HSD17B7  |
| chr3:160356012-160383504  | 1    | IFT80    |
| chrX:100862170-100863595  | 0    | NOX1     |
| chr19:19383482-19383697   | 25   | nogene   |
| chr5:73832337-73858219    | 62   | ARHGEF28 |
| chr5:157492972-157494795  | 58   | ADAM19   |
| chr2:111833219-111843599  | 0    | ANAPC1   |
| chr12:52073574-52073902   | 18   | ATG101   |
| chr20:56381432-56388202   | 36   | AURKA    |
| chr6:136277864-136282687  | 27   | BCLAF1   |
| chr11:70417012-70419856   | 18   | CTTN     |
| chr2:232014834-232015671  | 49   | DIS3L2   |
| chr5:74745677-74750667    | 116  | GFM2     |
| chr9:92243215-92249941    | 38   | IARS     |
| chr15:90448572-90449643   | 0    | IQGAP1   |
| chr1:10365099-10365648    | 3    | KIF1B    |
| chr17:12054888-12057104   | 19   | MAP2K4   |
| chr11:47625673-47625867   | 19   | MTCH2    |
| chr9:97139852-97211487    | 18   | nogene   |
| chr5:131395562-131415145  | 0    | nogene   |
| chr5:73406444-73406818    | 18   | nogene   |

|                           |      |              |
|---------------------------|------|--------------|
| chr6:52665273-52667493    | 16   | nogene       |
| chrX:71292453-71293326    | 27   | nogene       |
| chr9:136386699-136388023  | 26   | nogene       |
| chr18:9367487-9388140     | 78   | nogene       |
| chr1:46077514-46080750    | 6    | PIK3R3       |
| chrX:24809897-24888122    | 37   | POLA1        |
| chr4:128992166-129003876  | 1463 | SCLT1        |
| chr17:51031680-51056482   | 2    | SPAG9        |
| chr6:158573419-158589782  | 662  | TMEM181      |
| chr1:25351625-25352974    | 24   | TMEM50A      |
| chr6:99437245-99443662    | 18   | USP45        |
| chrX:101020486-101021315  | 27   | TRMT2B       |
| chr1:97679094-97700302    | 0    | DPYD         |
| chr2:206149019-206153682  | 4    | NDUFS1       |
| chr3:47056820-47062346    | 30   | SETD2        |
| chr10:121551289-121565704 | 18   | FGFR2        |
| chr1:240294821-240334229  | 27   | FMN2         |
| chr10:38159635-38177975   | 23   | LOC100129055 |
| chr12:124372021-124372610 | 18   | NCOR2        |
| chr7:130046627-130046988  | 28   | nogene       |
| chr17:1354210-1355864     | 19   | YWHAE        |
| chr2:108729131-108740681  | 45   | RANBP2       |
| chr11:134194015-134194738 | 19   | NCAPD3       |
| chr12:56213957-56216613   | 16   | RNF41        |
| chr2:203380207-203417081  | 49   | ABI2         |
| chrX:78014661-78020398    | 77   | ATP7A        |
| chr11:686857-688460       | 0    | DEAF1        |
| chr19:14042452-14042789   | 141  | IL27RA       |
| chr15:99671322-99675458   | 57   | MEF2A        |
| chr15:55680053-55680628   | 24   | PRTG         |
| chr15:40709024-40728824   | 134  | RAD51        |
| chr9:125915685-125935607  | 55   | PBX3         |
| chr8:98706466-98707311    | 1220 | STK3         |
| chr5:145703974-145765000  | 26   | PRELID2      |
| chr1:92624175-92636336    | 58   | EVI5         |
| chr6:100715461-100725703  | 225  | ASCC3        |
| chr9:34269256-34286704    | 8    | KIF24        |
| chr17:45096193-45097244   | 1    | NMT1         |
| chr15:42810613-42840433   | 106  | TTBK2        |
| chr4:39922621-39928164    | 18   | PDS5A        |
| chr2:170015280-170040985  | 1    | UBR3         |
| chr6:107098550-107099296  | 32   | BEND3        |
| chr13:24499300-24501834   | 54   | PARP4        |

|                           |     |              |
|---------------------------|-----|--------------|
| chr8:42861744-42887871    | 97  | RNF170       |
| chr1:173941264-173943588  | 9   | RC3H1        |
| chr1:92736397-92736627    | 0   | EVI5         |
| chrX:80289663-80310233    | 140 | CHMP1B2P     |
| chr15:51535662-51547408   | 32  | DMXL2        |
| chr14:96555846-96556413   | 8   | PAPOLA       |
| chr20:37203884-37210165   | 16  | RPN2         |
| chr9:15744272-15848947    | 21  | CCDC171      |
| chr12:31423596-31442925   | 0   | DENND5B      |
| chr13:45151686-45252970   | 21  | GTF2F2       |
| chr5:179617988-179621035  | 0   | HNRNPH1      |
| chr14:24266429-24268619   | 146 | RABGGTA      |
| chr7:44206384-44208198    | 21  | YKT6         |
| chrX:97072940-97075261    | 16  | DIAPH2       |
| chr19:7938026-7941197     | 24  | TIMM44       |
| chr20:32366383-32391167   | 165 | ASXL1        |
| chr10:26764509-26765318   | 1   | ABI1         |
| chr17:35624396-35627726   | 5   | AP2B1        |
| chr16:3685995-3690985     | 16  | TRAP1        |
| chr6:38577599-38580437    | 20  | BTBD9        |
| chr9:137256328-137257054  | 0   | NELFB        |
| chr5:80146089-80147284    | 0   | SERINC5      |
| chr6:1959866-2124731      | 0   | GMDS         |
| chr2:185729328-185757810  | 1   | LOC101927196 |
| chr8:65669872-65708011    | 18  | MTFR1        |
| chr9:98134805-98137688    | 0   | CORO2A       |
| chr9:113284294-113288264  | 0   | PRPF4        |
| chr10:84417770-84438707   | 197 | CCSER2       |
| chr17:82763964-82781721   | 962 | TBCD         |
| chr9:14639895-14662326    | 78  | ZDHHC21      |
| chr11:70419745-70420510   | 32  | CTTN         |
| chr19:8455404-8467584     | 24  | HNRNPM       |
| chr17:59081096-59088407   | 36  | TRIM37       |
| chr16:28487455-28489386   | 15  | CLN3         |
| chr2:37101922-37104132    | 25  | nogene       |
| chr14:35018691-35019074   | 3   | SRP54        |
| chr3:119500694-119517315  | 122 | TIMMDC1      |
| chr6:57128728-57133192    | 1   | ZNF451       |
| chr11:108673466-108679560 | 146 | DDX10        |
| chr4:82844385-82881940    | 17  | SEC31A       |
| chr10:110100624-110112915 | 17  | ADD3         |
| chr5:111344023-111376942  | 17  | CAMK4        |
| chr4:124500895-124556510  | 11  | LOC101927087 |

|                          |      |               |
|--------------------------|------|---------------|
| chr16:47463881-47547548  | 4    | PHKB          |
| chr16:70526586-70544533  | 15   | SF3B3         |
| chr11:71147119-71224796  | 24   | SHANK2        |
| chr22:39415005-39416877  | 18   | TAB1          |
| chr10:17733834-17776170  | 7    | TMEM236       |
| chr1:1817836-1839238     | 40   | GNB1          |
| chr11:18283794-18285459  | 27   | HPS5          |
| chr1:243415701-243418076 | 2    | SDCCAG8       |
| chr6:80127546-80171390   | 29   | BCKDHB        |
| chr2:201738669-201744429 | 11   | ALS2          |
| chr14:55151694-55154806  | 15   | DLGAP5        |
| chr11:64274907-64281098  | 15   | nogene        |
| chr7:105200912-105203785 | 16   | SRPK2         |
| chr10:74043082-74074903  | 15   | VCL           |
| chr2:85356966-85377474   | 0    | ELMOD3        |
| chr15:90448572-90456315  | 10   | IQGAP1        |
| chrX:63223732-63259817   | 13   | nogene        |
| chr8:61567167-61584029   | 15   | ASPH          |
| chrX:14796159-14797298   | 1    | nogene        |
| chr5:136147831-136154163 | 373  | SMAD5         |
| chr3:143985542-143985846 | 141  | C3orf58       |
| chr9:113198854-113199963 | 17   | FKBP15        |
| chr11:3683199-3695606    | 0    | NUP98         |
| chr2:173363225-173365592 | 24   | CDCA7         |
| chr3:56670072-56673725   | 0    | FAM208A       |
| chr1:108896863-108901945 | 21   | GPSM2         |
| chr18:77016831-77105286  | 0    | MBP           |
| chr1:176027571-176046324 | 46   | RFWD2         |
| chr16:30197269-30203685  | 0    | SLX1B-SULT1A4 |
| chr1:212872677-212885396 | 0    | FLVCR1        |
| chr1:24440171-24445244   | 2    | NIPAL3        |
| chr21:39177434-39181878  | 0    | PSMG1         |
| chr8:140700890-140752316 | 26   | PTK2          |
| chr3:27448650-27452498   | 312  | SLC4A7        |
| chr15:64499292-64500166  | 2329 | ZNF609        |
| chr13:23862301-23886506  | 126  | MIPEP         |
| chr13:45985296-45989097  | 23   | ZC3H13        |
| chr1:99740792-99749001   | 26   | FRRS1         |
| chr15:40751425-40752178  | 1    | RMDN3         |
| chr4:142260491-142270774 | 1    | INPP4B        |
| chr4:103328124-103343235 | 17   | nogene        |
| chr3:67237400-67241915   | 19   | nogene        |
| chr3:172112451-172226947 | 18   | FNDC3B        |

|                           |     |              |
|---------------------------|-----|--------------|
| chr1:167951799-167975015  | 55  | DCAF6        |
| chr12:1083163-1141787     | 1   | ERC1         |
| chr3:192335360-192402696  | 4   | FGF12        |
| chr6:33776922-33786774    | 0   | LEMD2        |
| chr4:1265339-1265907      | 157 | nogene       |
| chr4:378072-378363        | 173 | nogene       |
| chr5:14678680-14693396    | 17  | OTULIN       |
| chr14:22909482-22913845   | 0   | RBM23        |
| chr1:230943805-230954403  | 17  | TTC13        |
| chr1:10095460-10122076    | 15  | UBE4B        |
| chr2:199380363-199381820  | 15  | SATB2        |
| chr3:195294718-195297281  | 15  | ACAP2        |
| chr3:138570317-138572984  | 278 | CEP70        |
| chr6:84444386-84470904    | 203 | LINC01611    |
| chr17:31966146-31976614   | 79  | SUZ12        |
| chr1:155438326-155440593  | 0   | ASH1L        |
| chr5:160074988-160080770  | 15  | PWWP2A       |
| chr8:47595810-47599196    | 291 | SPIDR        |
| chr2:191693202-191693554  | 14  | LOC105747689 |
| chrX:155415574-155419562  | 125 | nogene       |
| chr1:28274824-28279241    | 84  | SESN2        |
| chr14:21371873-21373430   | 47  | SUPT16H      |
| chr8:124320085-124330792  | 79  | TMEM65       |
| chr2:203245845-203246921  | 39  | CYP20A1      |
| chr3:136586801-136591549  | 0   | nogene       |
| chr14:96833466-96853166   | 19  | VRK1         |
| chr3:58806394-58831889    | 15  | C3orf67      |
| chr8:23566107-23568378    | 34  | SLC25A37     |
| chr1:46055794-46062071    | 2   | PIK3R3       |
| chr7:141596561-141611287  | 15  | AGK          |
| chr7:131338840-131399433  | 17  | MKLN1        |
| chr1:110404970-110405270  | 31  | nogene       |
| chr2:155809927-155811964  | 17  | nogene       |
| chr19:5927967-5941707     | 15  | RANBP3       |
| chr22:40353072-40363071   | 5   | ADSL         |
| chr12:123395046-123396432 | 28  | SETD8        |
| chr5:896664-901431        | 34  | TRIP13       |
| chr15:42794643-42817097   | 32  | TTBK2        |
| chr3:196368027-196403019  | 116 | UBXN7        |
| chr1:77154448-77210489    | 39  | PIGK         |
| chr2:159136193-159150556  | 77  | TANC1        |
| chr17:2377856-2381162     | 0   | SGSM2        |
| chr5:75685206-75702810    | 47  | POC5         |



|                           |      |          |
|---------------------------|------|----------|
| chr4:106324984-106331883  | 17   | AIMP1    |
| chr14:102159235-102159536 | 17   | nogene   |
| chr10:68522737-68523199   | 42   | nogene   |
| chr2:232747614-232749082  | 0    | GIGYF2   |
| chr7:131397266-131399433  | 0    | MKLN1    |
| chr9:4860124-4860901      | 181  | RCL1     |
| chr5:176943334-176958154  | 1227 | UIMC1    |
| chr7:96277195-96296951    | 32   | SLC25A13 |
| chr7:75052710-75056074    | 0    | WBSCR16  |
| chr7:140739811-140749418  | 1    | BRAF     |
| chr3:33051757-33068970    | 7    | GLB1     |
| chr19:40616888-40619493   | 45   | LTBP4    |
| chr19:48913010-48913564   | 81   | NUCB1    |
| chr20:37065423-37068186   | 212  | RBL1     |
| chrX:154399486-154400626  | 15   | RPL10    |
| chr11:102205892-102227581 | 15   | YAP1     |
| chr4:77031172-77066405    | 18   | CCNI     |
| chrX:108595508-108597568  | 31   | COL4A5   |
| chr14:31156839-31178254   | 0    | HECTD1   |
| chr12:112269703-112274960 | 26   | HECTD4   |
| chr2:58048826-58089723    | 154  | VRK2     |
| chrX:129032349-129034541  | 2    | nogene   |
| chr1:167765582-167803537  | 0    | MPZL1    |
| chr6:131030966-131031817  | 18   | nogene   |
| chr15:67226900-67236820   | 29   | AAGAB    |
| chr4:147939824-147955374  | 435  | ARHGAP10 |
| chr10:35483403-35516623   | 38   | CCNY     |
| chr2:201854873-201880167  | 21   | CDK15    |
| chr2:37013840-37020836    | 3    | HEATR5B  |
| chr19:6222120-6270759     | 0    | MLLT1    |
| chr15:99799809-99800121   | 1    | nogene   |
| chr1:1868780-1869894      | 21   | nogene   |
| chr14:92017681-92033253   | 18   | TRIP11   |
| chr12:11028400-11047188   | 80   | PRH1     |
| chr6:116689319-116692392  | 507  | KPNA5    |
| chr4:74174505-74201370    | 55   | MTHFD2L  |
| chr17:82756164-82781721   | 141  | TBCD     |
| chr10:31820386-31831800   | 1    | ARHGAP12 |
| chr14:31112415-31114340   | 24   | HECTD1   |
| chr10:6213622-6226365     | 0    | PFKFB3   |
| chr12:100204939-100205757 | 15   | ACTR6    |
| chr18:12337340-12371691   | 15   | AFG3L2   |
| chr10:5096409-5196951     | 0    | AKR1C3   |

|                           |     |           |
|---------------------------|-----|-----------|
| chr10:97256317-97266125   | 26  | ARHGAP19  |
| chr12:26922615-26925851   | 15  | ASUN      |
| chr12:22490122-22506819   | 72  | C2CD5     |
| chr20:35630438-35631777   | 20  | CPNE1     |
| chr2:36387971-36396787    | 129 | CRIM1     |
| chr5:138781922-138783372  | 74  | CTNNA1    |
| chr3:41224020-41227352    | 196 | CTNNB1    |
| chr6:18256360-18258405    | 304 | DEK       |
| chr10:12084539-12101181   | 20  | DHTKD1    |
| chr21:46484756-46504489   | 0   | DIP2A     |
| chr14:102019892-102022880 | 48  | DYNC1H1   |
| chr9:137811460-137818138  | 101 | EHMT1     |
| chr12:22643762-22644022   | 0   | ETNK1     |
| chr5:32121494-32143880    | 68  | GOLPH3    |
| chr6:57919783-57926510    | 192 | GUSBP4    |
| chr6:30234357-30254464    | 0   | HCG17     |
| chr5:55896349-55900132    | 0   | IL31RA    |
| chr17:42114218-42115035   | 20  | KAT2A     |
| chr10:32017142-32018562   | 31  | KIF5B     |
| chr18:6961585-6965432     | 15  | LAMA1     |
| chr7:130941412-130945835  | 0   | LINC-PINT |
| chr6:149836084-149853160  | 52  | LRP11     |
| chr7:24663589-24666089    | 37  | MPP6      |
| chr22:29970975-29991670   | 5   | MTMR3     |
| chr12:54185810-54186391   | 55  | nogene    |
| chr4:142654586-142729497  | 5   | nogene    |
| chr11:29037741-29063536   | 8   | nogene    |
| chr17:30743300-30745851   | 52  | nogene    |
| chr9:125929654-125935607  | 79  | PBX3      |
| chr2:43726271-43738520    | 0   | PLEKHH2   |
| chr7:677228-711527        | 331 | PRKAR1B   |
| chr9:123010353-123020459  | 0   | RABGAP1   |
| chr9:89325426-89328886    | 20  | SECISBP2  |
| chr12:56346145-56346624   | 0   | STAT2     |
| chr3:4351566-4362254      | 20  | SUMF1     |
| chr9:109106507-109108570  | 496 | TMEM245   |
| chr1:95143890-95151419    | 489 | TMEM56    |
| chr17:40402905-40404883   | 20  | TOP2A     |
| chr7:99004189-99005348    | 20  | TRRAP     |
| chr9:83665029-83677961    | 131 | UBQLN1    |
| chr6:34791835-34792294    | 20  | UHRF1BP1  |
| chr2:43225796-43226264    | 15  | ZFP36L2   |
| chr2:11765532-11783922    | 10  | LPIN1     |

|                           |     |           |
|---------------------------|-----|-----------|
| chr1:35831426-35835993    | 4   | AGO4      |
| chr5:126549928-126554393  | 17  | ALDH7A1   |
| chr11:93675570-93679552   | 17  | CEP295    |
| chr12:1371832-1444750     | 164 | ERC1      |
| chr2:210153494-210154611  | 34  | KANSL1L   |
| chr7:131052424-131108803  | 0   | LINC-PINT |
| chr6:150876089-150887981  | 33  | MTHFD1L   |
| chrX:12799206-12810146    | 18  | PRPS2     |
| chr9:97428459-97432238    | 17  | TDRD7     |
| chr1:153941230-153942113  | 17  | DENND4B   |
| chr4:102714437-102723967  | 32  | MANBA     |
| chr7:158631643-158646563  | 18  | NCAPG2    |
| chr19:12707295-12709114   | 17  | nogene    |
| chr19:43486265-43487123   | 1   | PHLDB3    |
| chr19:5047475-5082504     | 276 | KDM4B     |
| chr11:29476144-29484062   | 18  | nogene    |
| chr1:222724091-222730177  | 1   | BROX      |
| chr10:124681606-124682379 | 226 | FAM53B    |
| chr15:78470531-78471924   | 48  | IREB2     |
| chr15:42950261-42960701   | 31  | UBR1      |
| chrX:65051461-65075912    | 54  | nogene    |
| chr13:32124285-32124875   | 1   | FRY       |
| chr6:167890861-167898467  | 0   | MLLT4     |
| chr15:61015797-61034926   | 36  | nogene    |
| chr15:56142777-56144483   | 11  | RFX7      |
| chr3:141368644-141404031  | 15  | ZBTB38    |
| chr22:38552665-38568289   | 47  | DMC1      |
| chr1:248844482-248845662  | 7   | ZNF672    |
| chr11:12764178-12764434   | 171 | TEAD1     |
| chr5:180316340-180317058  | 59  | GFPT2     |
| chr17:78414878-78419675   | 31  | PGS1      |
| chr8:99038422-99041418    | 110 | VPS13B    |
| chr8:130187235-130236994  | 7   | ASAP1     |
| chr12:54345459-54348051   | 0   | COPZ1     |
| chr2:131052890-131055695  | 18  | FAM168B   |
| chr14:20395449-20396730   | 18  | TEP1      |
| chr17:40406383-40406942   | 156 | TOP2A     |
| chr16:2002753-2002990     | 17  | ZNF598    |
| chr15:92978233-92979283   | 0   | CHD2      |
| chr2:25596085-25628384    | 1   | DTNB      |
| chrX:131731128-131794466  | 17  | FIRRE     |
| chr11:63749990-63753708   | 1   | RTN3      |
| chr2:148178699-148342336  | 19  | MBD5      |

|                           |      |              |
|---------------------------|------|--------------|
| chr2:29133654-29157402    | 7    | CLIP4        |
| chr21:28163601-28170143   | 0    | LOC101927973 |
| chr5:80848447-80854316    | 17   | MSH3         |
| chr6:43055544-43056445    | 1023 | MRPL2        |
| chr12:131753122-131766308 | 52   | SFSWAP       |
| chr3:192727180-192754017  | 19   | FGF12        |
| chr18:21765771-21804014   | 53   | MIB1         |
| chr1:197642710-197715074  | 29   | DENND1B      |
| chr14:99850123-99851035   | 41   | EML1         |
| chr19:18539370-18539720   | 864  | FKBP8        |
| chr7:18762156-18793452    | 1    | HDAC9        |
| chr6:7602622-7606195      | 70   | SNRNP48      |
| chr20:44972077-44987296   | 9    | STK4         |
| chr2:159136193-159163546  | 0    | TANC1        |
| chr11:67215339-67228163   | 6    | KDM2A        |
| chr5:140676653-140683219  | 0    | HARS         |
| chr4:147906637-147946704  | 3    | ARHGAP10     |
| chr20:35729311-35732135   | 437  | RBM39        |
| chr1:176144004-176176007  | 1    | RFWD2        |
| chr6:42883450-42886470    | 94   | RPL7L1       |
| chr19:50398847-50399484   | 42   | POLD1        |
| chr2:36916077-36925208    | 4    | STRN         |
| chr17:59731420-59773944   | 24   | VMP1         |
| chr11:65393572-65394425   | 8    | FRMD8        |
| chr12:51049033-51058128   | 78   | LETMD1       |
| chr2:159169249-159170805  | 28   | TANC1        |
| chr5:151797226-151799313  | 67   | G3BP1        |
| chr16:4261778-4262701     | 138  | TFAP4        |
| chr12:49371227-49490731   | 18   | SPATS2       |
| chr17:61889785-61891689   | 3    | INTS2        |
| chr1:240294821-240355908  | 33   | FMN2         |
| chr12:98523893-98524353   | 30   | nogene       |
| chr12:7303277-7317157     | 8    | nogene       |
| chr13:25320529-25338731   | 17   | NUPL1        |
| chr3:66236543-66263379    | 115  | SLC25A26     |
| chr7:42023467-42048696    | 96   | GLI3         |
| chr2:230759958-230793331  | 24   | CAB39        |
| chr9:132642003-132652492  | 3    | DDX31        |
| chr1:8866278-8868057      | 10   | ENO1         |
| chr19:16556922-16557126   | 0    | nogene       |
| chr5:181099848-181100673  | 23   | nogene       |
| chr21:44055697-44063785   | 0    | TRAPPC10     |
| chr21:37420298-37425781   | 67   | DYRK1A       |

|                           |     |            |
|---------------------------|-----|------------|
| chr13:59969943-59974456   | 21  | DIAPH3     |
| chr12:116833791-116836282 | 15  | RNFT2      |
| chr3:63898398-63952483    | 148 | ATXN7      |
| chr6:116689319-116692156  | 30  | KPNA5      |
| chr17:75321658-75332797   | 1   | GRB2       |
| chr10:101939862-101957732 | 41  | C10orf76   |
| chr3:49044389-49077038    | 9   | QRICH1     |
| chr3:66243202-66263379    | 120 | SLC25A26   |
| chr14:88746184-88754671   | 11  | EML5       |
| chr19:45277922-45280734   | 65  | MARK4      |
| chr21:43734068-43743807   | 17  | PDXK       |
| chr5:127523459-127526778  | 18  | PRRC1      |
| chr6:43533906-43553503    | 46  | XPO5       |
| chr18:76849621-76871825   | 21  | ZNF236     |
| chr1:229463542-229475732  | 17  | NUP133     |
| chr20:25632157-25645648   | 264 | ZNF337-AS1 |
| chr18:12999420-13042334   | 134 | CEP192     |
| chr15:92953356-92955512   | 0   | CHD2       |
| chrX:115465389-115465650  | 0   | nogene     |
| chr11:17992930-18008076   | 15  | SERGEF     |
| chr6:144537581-144577288  | 0   | UTRN       |
| chr3:58118871-58121503    | 27  | FLNB       |
| chr1:31005852-31028864    | 6   | PUM1       |
| chr5:16763480-16766198    | 55  | MYO10      |
| chr3:171123595-171128878  | 1   | TNIK       |
| chr14:74549862-74555693   | 18  | LTBP2      |
| chr8:86494828-86507112    | 26  | RMDN1      |
| chr4:9641070-9641431      | 278 | nogene     |
| chr19:14121531-14126237   | 1   | ASF1B      |
| chr17:83048470-83048785   | 203 | B3GNTL1    |
| chr16:29835703-29836958   | 5   | MVP        |
| chr17:67967007-67967236   | 16  | nogene     |
| chr8:52685398-52686156    | 20  | RB1CC1     |
| chr13:23353784-23356007   | 34  | SACS       |
| chr6:75702644-75711416    | 112 | SENP6      |
| chr4:26716212-26720125    | 16  | TBC1D19    |
| chr17:38306532-38320767   | 1   | MRPL45     |
| chr10:11594630-11597717   | 10  | USP6NL     |
| chr9:20694519-20765073    | 0   | FOCAD      |
| chr12:30661140-30666251   | 26  | IPO8       |
| chr5:181185578-181185906  | 16  | nogene     |
| chr17:82905935-82911789   | 97  | TBCD       |
| chr1:8495062-8557523      | 79  | RERE       |

|                           |     |         |
|---------------------------|-----|---------|
| chr9:36375933-36390616    | 2   | RNF38   |
| chr12:122477840-122478292 | 60  | ZCCHC8  |
| chr13:29530537-29553860   | 634 | SLC7A1  |
| chr15:72695176-72724655   | 13  | BBS4    |
| chr9:137743370-137758011  | 20  | EHMT1   |
| chr2:232922245-232922597  | 23  | nogene  |
| chr4:147653851-147654566  | 11  | PRMT9   |
| chr17:18340042-18348440   | 4   | SHMT1   |
| chr12:51106524-51117747   | 1   | TFCP2   |
| chr4:84708908-84715383    | 0   | WDFY3   |
| chr2:231202784-231203095  | 0   | nogene  |
| chr7:851383-866067        | 20  | SUN1    |
| chr1:155676547-155680456  | 96  | YY1AP1  |
| chr18:12344131-12371691   | 1   | AFG3L2  |
| chr7:2437803-2438545      | 25  | nogene  |
| chr1:26452298-26452844    | 18  | nogene  |
| chr20:3945176-3974400     | 150 | RNF24   |
| chr2:36877890-36894033    | 28  | STRN    |
| chr1:162566011-162590511  | 42  | UAP1    |
| chr17:39423326-39432016   | 18  | MED1    |
| chr4:143415476-143415771  | 1   | GAB1    |
| chr22:23574214-23639569   | 32  | nogene  |
| chr5:134661118-134661586  | 55  | SEC24A  |
| chr8:124504270-124516030  | 28  | TATDN1  |
| chr9:96719508-96721130    | 63  | nogene  |
| chr17:42727634-42730918   | 46  | EZH1    |
| chr9:6980924-6990524      | 2   | KDM4C   |
| chr1:70163378-70164145    | 17  | nogene  |
| chr2:11815087-11820514    | 6   | LPIN1   |
| chr22:44921971-44922363   | 15  | nogene  |
| chr12:1754257-1784073     | 7   | ADIPOR2 |
| chr10:72128081-72133181   | 10  | ASCC1   |
| chr5:71517321-71522949    | 17  | BDP1    |
| chr20:34096656-34098633   | 187 | EIF2S2  |
| chr4:70826123-70833273    | 1   | GRSF1   |
| chr1:100077164-100078548  | 2   | HIAT1   |
| chr4:128074459-128091512  | 34  | LARP1B  |
| chr9:13216773-13250372    | 1   | MPDZ    |
| chr1:236041909-236048989  | 31  | NID1    |
| chr3:138542690-138572984  | 20  | nogene  |
| chr22:26496072-26496889   | 17  | TFIP11  |
| chr1:247860616-247864935  | 16  | TRIM58  |
| chr5:14290715-14336727    | 379 | TRIO    |

|                           |     |          |
|---------------------------|-----|----------|
| chr7:7877280-7884346      | 178 | UMAD1    |
| chr22:41325563-41325918   | 36  | ZC3H7B   |
| chr9:34680905-34681217    | 0   | nogene   |
| chr1:179120189-179121867  | 134 | ABL2     |
| chrX:63722761-63724711    | 32  | ARHGEF9  |
| chr22:17594528-17600095   | 1   | ATP6V1E1 |
| chr6:84185186-84204096    | 17  | CEP162   |
| chr2:29131257-29135666    | 60  | CLIP4    |
| chr10:472438-520355       | 0   | DIP2C    |
| chr11:103280347-103316620 | 34  | DYNC2H1  |
| chr8:11808793-11831670    | 2   | FDFT1    |
| chr6:109715077-109743772  | 2   | FIG4     |
| chr9:127311635-127325095  | 43  | GARNL3   |
| chr22:19820597-19821375   | 16  | GNB1L    |
| chr1:236178413-236180028  | 2   | GPR137B  |
| chr11:119126934-119128448 | 3   | HINFP    |
| chr1:20770929-20780540    | 16  | HP1BP3   |
| chr21:43613829-43644392   | 9   | HSF2BP   |
| chrX:53647367-53654131    | 0   | HUWE1    |
| chr3:48689537-48691482    | 24  | IP6K2    |
| chr10:63380317-63384661   | 14  | JMJD1C   |
| chr3:44814910-44828300    | 14  | KIF15    |
| chr17:61987006-61995365   | 4   | MED13    |
| chr14:21498297-21503881   | 0   | METTL3   |
| chr12:112071894-112078741 | 18  | NAA25    |
| chr19:12249977-12250368   | 13  | nogene   |
| chr1:155314724-155315284  | 5   | nogene   |
| chr16:72308055-72391215   | 4   | nogene   |
| chr6:150978152-150978936  | 16  | nogene   |
| chrX:152635881-152641295  | 68  | nogene   |
| chr5:126793647-126794160  | 35  | nogene   |
| chr2:174141824-174246815  | 0   | OLA1     |
| chr3:196812218-196820567  | 11  | PAK2     |
| chr5:134197324-134206131  | 17  | PPP2CA   |
| chr5:38996818-39003622    | 19  | RICTOR   |
| chr2:11286538-11287736    | 60  | ROCK2    |
| chr1:169477154-169477757  | 118 | SLC19A2  |
| chr14:61030444-61046167   | 46  | SLC38A6  |
| chr15:58912562-58913696   | 181 | SLTM     |
| chr12:64062916-64080370   | 1   | SRGAP1   |
| chr6:85636966-85641451    | 36  | SYNCRIP  |
| chr15:42794643-42830078   | 2   | TTBK2    |
| chr16:31091087-31091342   | 1   | VKORC1   |

|                           |     |          |
|---------------------------|-----|----------|
| chr5:113556051-113563492  | 15  | YTHDC2   |
| chr10:31461036-31502509   | 145 | ZEB1     |
| chr11:6941570-6955782     | 633 | ZNF215   |
| chr19:13115625-13116052   | 0   | TRMT1    |
| chr1:155215053-155235311  | 42  | GBAP1    |
| chr3:15003875-15016254    | 1   | NR2C2    |
| chr6:43546570-43573601    | 15  | XPO5     |
| chrX:68234486-68299096    | 35  | OPHN1    |
| chr6:100638600-100662536  | 14  | ASCC3    |
| chr1:174370978-174394145  | 92  | RABGAP1L |
| chr14:30586717-30593639   | 26  | G2E3     |
| chr1:77803269-77807101    | 33  | FAM73A   |
| chr15:76274411-76292700   | 8   | ETFA     |
| chr3:136443286-136477412  | 28  | STAG1    |
| chr5:148634865-148677235  | 14  | nogene   |
| chr2:71426459-71427414    | 18  | ZNF638   |
| chr3:155893517-155898041  | 35  | GMPS     |
| chr4:153626146-153632838  | 7   | KIAA0922 |
| chr14:103405075-103428440 | 74  | MARK3    |
| chr11:8671785-8680063     | 0   | nogene   |
| chr1:100275598-100287203  | 17  | RTCA     |
| chr15:76471211-76665789   | 17  | SCAPER   |
| chr12:49460769-49489573   | 16  | SPATS2   |
| chr14:89971174-89985210   | 16  | TDP1     |
| chr4:153270334-153276130  | 28  | TRIM2    |
| chr8:86380725-86381629    | 0   | WWP1     |
| chr6:129494067-129558166  | 23  | nogene   |
| chr6:7210803-7211709      | 1   | RREB1    |
| chr17:1067076-1100735     | 19  | ABR      |
| chr6:110736032-110746201  | 2   | CDK19    |
| chr1:6667708-6681037      | 161 | DNAJC11  |
| chr15:89273376-89293063   | 19  | FANCI    |
| chr6:104833041-104843298  | 253 | HACE1    |
| chr1:32031523-32033334    | 0   | KHDRBS1  |
| chr4:122272159-122279981  | 19  | KIAA1109 |
| chr3:138488412-138488649  | 50  | nogene   |
| chr19:33012646-33044364   | 19  | RHPN2    |
| chr19:37425867-37426378   | 174 | ZNF569   |
| chr3:138621406-138622416  | 41  | FAIM     |
| chr4:53425871-53428183    | 122 | FIP1L1   |
| chr3:131468090-131471279  | 216 | MRPL3    |
| chr7:94061455-94064477    | 62  | nogene   |
| chr11:46783273-46790583   | 25  | CKAP5    |



|                           |      |           |
|---------------------------|------|-----------|
| chr15:80978765-80982182   | 23   | MESDC2    |
| chr6:17661652-17675770    | 154  | NUP153    |
| chr11:2986296-2986727     | 33   | nogene    |
| chr17:66062962-66132763   | 17   | CEP112    |
| chr3:51386207-51387878    | 17   | MANF      |
| chr1:145747994-145788966  | 0    | RNF115    |
| chr10:7200413-7220537     | 17   | SFMBT2    |
| chr7:133035151-133035432  | 48   | nogene    |
| chr8:11808793-11838573    | 41   | FDFT1     |
| chr6:151009818-151015693  | 78   | MTHFD1L   |
| chr15:40597530-40597917   | 16   | nogene    |
| chr1:169836926-169850327  | 49   | C1orf112  |
| chr6:154787860-154805486  | 17   | SCAF8     |
| chrX:131743095-131794466  | 119  | FIRRE     |
| chr5:5436417-5447897      | 17   | ICE1      |
| chr9:85822879-85830576    | 14   | LOC389765 |
| chr12:66891900-66938347   | 14   | nogene    |
| chr10:122400342-122417968 | 0    | PLEKHA1   |
| chr19:29985222-29986417   | 1473 | UR11      |
| chr6:43527633-43567354    | 20   | XPO5      |
| chr6:136070223-136096288  | 0    | nogene    |
| chr14:102194937-102195120 | 0    | WDR20     |
| chr4:73168928-73177533    | 47   | ANKRD17   |
| chr22:19375630-19378066   | 36   | HIRA      |
| chr12:2817222-2818277     | 53   | ITFG2     |
| chr3:125848229-125863113  | 0    | nogene    |
| chr1:43894382-43899727    | 24   | ST3GAL3   |
| chr10:17157440-17168917   | 52   | TRDMT1    |
| chr6:25966334-25969420    | 6    | TRIM38    |
| chr16:21962459-21976243   | 96   | UQCRC2    |
| chr1:180078462-180080661  | 0    | CEP350    |
| chr7:101916114-101948970  | 1    | CUX1      |
| chr14:60798086-60812127   | 14   | MNAT1     |
| chr15:75505674-75527261   | 18   | PTPN9     |
| chr19:43925324-43930000   | 14   | ZNF45     |
| chr10:5959753-5966339     | 34   | IL15RA    |
| chr8:47396375-47407961    | 561  | SPIDR     |
| chr21:42862281-42863596   | 42   | WDR4      |
| chr19:47670442-47757178   | 1    | GLTSCR1   |
| chr7:134137022-134178609  | 9    | LRGUK     |
| chr12:68709237-68715740   | 17   | NUP107    |
| chr8:140360049-140405698  | 14   | TRAPPC9   |
| chr6:35281055-35287845    | 0    | ZNF76     |

|                           |     |          |
|---------------------------|-----|----------|
| chr3:37273535-37282272    | 45  | GOLGA4   |
| chr5:126804775-126811898  | 194 | LMNB1    |
| chr1:28639313-28639972    | 39  | nogene   |
| chr19:56449556-56462429   | 28  | ZNF667   |
| chr8:130152735-130358143  | 21  | ASAP1    |
| chr16:11020192-11061022   | 136 | CLEC16A  |
| chr6:151014879-151015693  | 122 | MTHFD1L  |
| chr5:2747540-2749787      | 3   | IRX2     |
| chr1:51922927-51923522    | 16  | nogene   |
| chr15:40185164-40185642   | 30  | BUB1B    |
| chr12:19462509-19514784   | 170 | AEBP2    |
| chr12:110018344-110025823 | 33  | ANKRD13A |
| chr2:39286851-39290334    | 7   | MAP4K3   |
| chr10:26702161-26709768   | 38  | PDSS1    |
| chr1:159918762-159920537  | 68  | TAGLN2   |
| chr3:179740246-179765848  | 29  | USP13    |
| chr7:33146268-33177591    | 0   | BBS9     |
| chr14:22950313-22952683   | 196 | HAUS4    |
| chr5:79640850-79669028    | 27  | PAPD4    |
| chr3:51541497-51590559    | 576 | RAD54L2  |
| chr1:156730699-156731159  | 52  | nogene   |
| chr1:93183359-93193744    | 78  | CCDC18   |
| chr11:93790573-93794035   | 150 | MED17    |
| chr14:75100991-75103997   | 30  | NEK9     |
| chr4:67745826-67802411    | 0   | nogene   |
| chr12:104318912-104325429 | 0   | TXNRD1   |
| chr1:92663419-92704744    | 139 | EVI5     |
| chr1:117402185-117405645  | 662 | MAN1A2   |
| chr10:70206263-70209685   | 28  | PPA1     |
| chr20:33619516-33623296   | 101 | CBFA2T2  |
| chr19:34396300-34396657   | 6   | GPI      |
| chr2:99169549-99171429    | 716 | MITD1    |
| chr18:49232862-49233148   | 3   | nogene   |
| chr17:47618349-47619164   | 234 | NPEPPS   |
| chr9:76067954-76107351    | 36  | PCSK5    |
| chr3:134158120-134195182  | 158 | RYK      |
| chr16:18819501-18828168   | 16  | SMG1     |
| chr18:9195550-9221999     | 63  | ANKRD12  |
| chr10:86875866-86876085   | 16  | BMPR1A   |
| chr5:37153739-37165671    | 9   | C5orf42  |
| chr10:12081471-12089255   | 6   | DHTKD1   |
| chr17:5462318-5463689     | 16  | DHX33    |
| chr5:6737509-6746427      | 486 | PAPD7    |

|                           |     |              |
|---------------------------|-----|--------------|
| chr11:68591575-68600494   | 5   | PPP6R3       |
| chr1:11016843-11020599    | 0   | TARDBP       |
| chr6:155285157-155298585  | 19  | TFB1M        |
| chr21:32383421-32385684   | 43  | URB1         |
| chr21:36391550-36402851   | 16  | CHAF1B       |
| chr20:41512845-41551360   | 69  | CHD6         |
| chr7:74875952-74876373    | 37  | nogene       |
| chr14:73089048-73089455   | 16  | nogene       |
| chr12:53455884-53459403   | 14  | PCBP2        |
| chr12:47212596-47216689   | 14  | PCED1B       |
| chr1:175986942-176027688  | 7   | RFWD2        |
| chr2:231235223-231240041  | 5   | ARMC9        |
| chr9:93471140-93516269    | 115 | FAM120A      |
| chr5:65451474-65473655    | 16  | ADAMTS6      |
| chr2:231206197-231235381  | 7   | ARMC9        |
| chr1:16036235-16058717    | 0   | FAM131C      |
| chr11:72984087-72989097   | 550 | FCHSD2       |
| chr8:41974703-41987563    | 75  | KAT6A        |
| chr19:4101018-4117629     | 2   | MAP2K2       |
| chr14:50475076-50504857   | 30  | MAP4K5       |
| chr6:89677569-89678745    | 16  | MDN1         |
| chr7:33637759-33642918    | 1   | nogene       |
| chr13:114052051-114057474 | 106 | RASA3        |
| chr2:223894233-223895630  | 14  | WDFY1        |
| chr11:76451857-76464080   | 11  | C11orf30     |
| chr12:122483459-122498863 | 16  | ZCCHC8       |
| chr4:83300959-83306317    | 0   | HPSE         |
| chr17:82763964-82814934   | 106 | TBCD         |
| chr5:115230975-115253255  | 28  | PGGT1B       |
| chr10:92974052-93014267   | 1   | EXOC6        |
| chr15:52425829-52428569   | 16  | MYO5A        |
| chr17:2700846-2701139     | 14  | CLUH         |
| chr17:82903404-82911789   | 122 | TBCD         |
| chr19:41378280-41378519   | 130 | TMEM91       |
| chr7:100548821-100555735  | 27  | AGFG2        |
| chr3:28251711-28263380    | 52  | CMC1         |
| chr10:27060344-27066548   | 0   | ANKRD26      |
| chrX:2722626-2726373      | 25  | CD99         |
| chr4:2699679-2700544      | 87  | FAM193A      |
| chr21:28163601-28217347   | 0   | LOC101927973 |
| chr12:115996475-115997230 | 1   | MED13L       |
| chr2:84870224-84870785    | 446 | TRABD2A      |
| chr2:216113015-216148276  | 14  | XRCC5        |

|                           |     |              |
|---------------------------|-----|--------------|
| chr15:100152611-100155320 | 24  | ADAMTS17     |
| chr1:109409927-109415363  | 18  | PSMA5        |
| chr15:38283496-38299547   | 24  | SPRED1       |
| chr22:39029362-39045542   | 2   | APOBEC3D     |
| chr13:24492420-24498229   | 2   | PARP4        |
| chr10:100354426-100354632 | 1   | SCD          |
| chr5:88270525-88287622    | 2   | TMEM161B-AS1 |
| chr2:11765532-11805156    | 0   | LPIN1        |
| chr5:64325185-64330406    | 89  | RNF180       |
| chr4:146292928-146294095  | 0   | SLC10A7      |
| chr5:19838758-19839242    | 6   | CDH18        |
| chr1:25448807-25456831    | 9   | TMEM57       |
| chr14:96833466-96847344   | 106 | VRK1         |
| chr1:108148278-108161293  | 206 | SLC25A24     |
| chr7:67055834-67117618    | 24  | TYW1         |
| chr10:35516522-35530243   | 269 | CCNY         |
| chr14:76154353-76195972   | 41  | GPATCH2L     |
| chr1:9972017-9981170      | 60  | NMNAT1       |
| chr4:39759544-39759926    | 17  | nogene       |
| chrX:72605270-72619305    | 16  | PHKA1        |
| chr14:34603347-34609742   | 21  | SNX6         |
| chr16:1397177-1403344     | 0   | UNKL         |
| chr2:232747614-232761436  | 297 | GIGYF2       |
| chr17:81270917-81284895   | 82  | SLC38A10     |
| chr6:43565659-43573601    | 98  | XPO5         |
| chr6:36524340-36525642    | 0   | STK38        |
| chr7:77765494-77773314    | 46  | RSBN1L       |
| chr19:4405911-4409759     | 147 | CHAF1A       |
| chr12:116230532-116237705 | 840 | MED13L       |
| chr7:69899285-69899498    | 16  | AUTS2        |
| chr7:13900737-13911307    | 1   | ETV1         |
| chr1:45509624-45509866    | 72  | nogene       |
| chr8:55950458-55953984    | 107 | LYN          |
| chr2:206279539-206318135  | 2   | ZDBF2        |
| chr2:109564365-109585838  | 35  | 10-Sep       |
| chr12:45948436-45964188   | 0   | SCAF11       |
| chr3:47720665-47772936    | 34  | SMARCC1      |
| chr14:76166662-76180849   | 157 | GPATCH2L     |
| chr19:11411252-11417059   | 1   | RGL3         |
| chr8:73527690-73709162    | 14  | STAU2        |
| chr20:64022756-64026058   | 92  | PRPF6        |
| chr10:68962081-68963469   | 0   | DDX21        |
| chr10:121898840-121926527 | 19  | ATE1         |

|                           |     |         |
|---------------------------|-----|---------|
| chr7:6591645-6591867      | 26  | C7orf26 |
| chrX:1386681-1389727      | 30  | SLC25A6 |
| chr14:96846094-96876120   | 23  | VRK1    |
| chr16:70264957-70265662   | 35  | AARS    |
| chr11:2964679-2979237     | 7   | NAP1L4  |
| chr11:77358897-77379994   | 1   | PAK1    |
| chr2:64551442-64553409    | 24  | AFTPH   |
| chr4:165305607-165310750  | 16  | KLHL2   |
| chr4:127930682-127942158  | 16  | MFSD8   |
| chr12:14794970-14797003   | 16  | WBP11   |
| chr22:41808874-41810291   | 827 | CCDC134 |
| chr10:30322390-30341640   | 23  | MTPAP   |
| chr4:80287336-80362884    | 71  | C4orf22 |
| chr16:15047441-15048099   | 1   | NTAN1   |
| chr16:47463881-47515601   | 53  | PHKB    |
| chr4:1918140-1918623      | 114 | WHSC1   |
| chr11:102205892-102209564 | 39  | YAP1    |
| chr8:22206853-22207516    | 0   | BMP1    |
| chr4:77055961-77056323    | 38  | CCNI    |
| chr18:49331863-49379758   | 364 | DYM     |
| chr17:44424348-44474903   | 10  | GPATCH8 |
| chr9:33068823-33071892    | 16  | SMU1    |
| chr11:126380829-126409411 | 25  | ST3GAL4 |
| chr21:31182420-31203012   | 86  | TIAM1   |
| chr2:200856681-200858089  | 32  | CLK1    |
| chr11:73843246-73860009   | 0   | MRPL48  |
| chr17:39709812-39715939   | 1   | ERBB2   |
| chr18:47841791-47896809   | 9   | SMAD2   |
| chr19:32599703-32602126   | 0   | ANKRD27 |
| chr11:67608551-67608722   | 0   | NDUFV1  |
| chr14:39074414-39085906   | 5   | SEC23A  |
| chr8:140347756-140360193  | 118 | TRAPPC9 |
| chr1:33280123-33281811    | 14  | ZNF362  |
| chr17:82756164-82783714   | 32  | TBCD    |
| chr4:2894012-2894731      | 14  | ADD1    |
| chr9:85618982-85633374    | 275 | AGTPBP1 |
| chr2:215312497-215319731  | 2   | ATIC    |
| chr1:50655441-50705891    | 16  | FAF1    |
| chrX:54151244-54159616    | 0   | FAM120C |
| chr9:128508875-128515639  | 69  | GLE1    |
| chr16:19871815-19872846   | 14  | GPRC5B  |
| chr17:46066536-46067667   | 24  | KANSL1  |
| chr19:53202551-53204142   | 0   | nogene  |

|                           |     |              |
|---------------------------|-----|--------------|
| chr2:240686437-240688825  | 25  | nogene       |
| chr3:132603228-132631479  | 29  | NPHP3-ACAD11 |
| chr3:183856431-183868060  | 24  | PARL         |
| chr11:85981128-85982003   | 6   | PICALM       |
| chr14:50640749-50645014   | 100 | SAV1         |
| chr19:44228445-44229816   | 19  | ZNF227       |
| chr3:97475351-97484059    | 0   | EPHA6        |
| chr14:51554589-51570410   | 4   | FRMD6        |
| chr12:77966228-78021862   | 3   | NAV3         |
| chr2:218673624-218676278  | 15  | STK36        |
| chr3:129827802-129828508  | 14  | TMCC1        |
| chr6:87213901-87218731    | 15  | ZNF292       |
| chr16:88033108-88038011   | 171 | BANP         |
| chr2:28926467-28935607    | 20  | WDR43        |
| chr11:68347846-68348243   | 94  | LRP5         |
| chr6:30627459-30642247    | 4   | ATAT1        |
| chr10:103347237-103348999 | 73  | PCGF6        |
| chr18:49491625-49491833   | 68  | RPL17        |
| chr20:41092471-41101353   | 140 | TOP1         |
| chr6:107503656-107587175  | 15  | SOBP         |
| chr7:131429032-131443702  | 3   | MKLN1        |
| chr2:230440475-230450255  | 3   | SP100        |
| chr20:13806444-13807091   | 14  | nogene       |
| chr8:140789473-140879637  | 27  | PTK2         |
| chr1:62577261-62586624    | 53  | DOCK7        |
| chr5:1611668-1612072      | 26  | nogene       |
| chr2:235883344-235968623  | 18  | AGAP1        |
| chr7:92294888-92327900    | 368 | ANKIB1       |
| chr5:78034360-78101025    | 18  | AP3B1        |
| chr6:129611532-129629522  | 2   | ARHGAP18     |
| chr3:11331339-11426926    | 9   | ATG7         |
| chr1:160313989-160333679  | 18  | COPA         |
| chr16:3770569-3770986     | 18  | CREBBP       |
| chr1:244657845-244692020  | 18  | DESI2        |
| chr6:30659471-30660242    | 1   | DHX16        |
| chr14:101991526-101994849 | 18  | DYNC1H1      |
| chr7:107179878-107196151  | 0   | HBP1         |
| chr3:183650295-183651276  | 12  | KLHL24       |
| chr4:102664684-102723967  | 18  | MANBA        |
| chr3:61621969-61623140    | 24  | nogene       |
| chr16:72193245-72308188   | 18  | nogene       |
| chr15:85109052-85126374   | 18  | PDE8A        |
| chr3:121467518-121485184  | 18  | POLQ         |

|                           |     |         |
|---------------------------|-----|---------|
| chr1:32668738-32672901    | 0   | RBBP4   |
| chr1:173946475-173964187  | 18  | RC3H1   |
| chr2:86251956-86282242    | 14  | REEP1   |
| chr20:36927181-36941111   | 18  | SAMHD1  |
| chr2:229829192-229860531  | 18  | TRIP12  |
| chr8:102299451-102300151  | 18  | UBR5    |
| chr7:99525812-99526418    | 18  | ZKSCAN5 |
| chr2:135345549-135350215  | 3   | ZRANB3  |
| chr2:168074981-168129758  | 59  | STK39   |
| chr14:37285317-37308519   | 117 | MIPOL1  |
| chr9:4823547-4841357      | 20  | RCL1    |
| chr11:3038049-3042256     | 15  | CARS    |
| chr12:120183568-120184887 | 0   | GCN1    |
| chr3:155114993-155118811  | 5   | MME     |
| chr2:11286538-11288449    | 261 | ROCK2   |
| chr2:9287003-9297445      | 16  | ASAP2   |
| chr9:135850136-135850461  | 218 | CAMSAP1 |
| chr5:50399106-50405852    | 19  | EMB     |
| chr4:48684672-48710698    | 125 | FRYL    |
| chr19:4475274-4488876     | 0   | HDGFRP2 |
| chr4:169424552-169433665  | 14  | NEK1    |
| chr12:71657548-71660427   | 14  | nogene  |
| chr1:51745535-51765981    | 48  | OSBPL9  |
| chr17:8262919-8263636     | 33  | PFAS    |
| chr2:28783906-28788809    | 156 | PPP1CB  |
| chr13:41907585-41950013   | 37  | VWA8    |
| chr19:51839892-51886912   | 19  | ZNF577  |
| chr4:76130655-76132719    | 3   | NUP54   |
| chr19:15397149-15410594   | 15  | AKAP8L  |
| chrX:15845378-15852524    | 0   | AP1S2   |
| chr21:25954589-25982477   | 29  | APP     |
| chr3:57575547-57577387    | 14  | ARF4    |
| chr6:36213879-36218010    | 105 | BRPF3   |
| chr2:44704282-44715353    | 366 | CAMKMT  |
| chr1:92736397-92745802    | 42  | EVI5    |
| chr22:32479132-32493281   | 15  | FBXO7   |
| chr1:37587310-37589082    | 206 | GNL2    |
| chr4:44707751-44722242    | 15  | GNPDA2  |
| chr4:142402937-142468055  | 4   | INPP4B  |
| chr3:122463941-122496570  | 15  | KPNA1   |
| chr12:52237508-52243137   | 15  | KRT7    |
| chr1:235693349-235697272  | 15  | LYST    |
| chr13:23745852-23746124   | 15  | nogene  |

|                          |      |         |
|--------------------------|------|---------|
| chr17:18661913-18663227  | 0    | nogene  |
| chr10:63448450-63448857  | 23   | nogene  |
| chr20:63672082-63672579  | 14   | nogene  |
| chr7:135571104-135573825 | 15   | NUP205  |
| chr10:3144291-3147737    | 15   | PITRM1  |
| chr17:76287191-76287897  | 15   | QRICH2  |
| chr17:783082-786716      | 15   | RNMTL1  |
| chr17:82884144-82911789  | 168  | TBCD    |
| chr17:82805874-82809782  | 30   | TBCD    |
| chr3:194604286-194628509 | 0    | TMEM44  |
| chr14:90676522-90786328  | 0    | TTC7B   |
| chr17:42612074-42613073  | 21   | TUBG1   |
| chr17:31885979-31887313  | 15   | UTP6    |
| chr20:58438944-58441083  | 1153 | VAPB    |
| chr3:51490154-51492513   | 15   | nogene  |
| chr16:22313619-22315208  | 46   | POLR3E  |
| chr3:23589733-23595250   | 39   | UBE2E2  |
| chr13:32522181-32527532  | 16   | N4BP2L2 |
| chr3:33812071-33828969   | 5    | PDCD6IP |
| chr1:48385308-48413151   | 16   | SPATA6  |
| chrX:129496749-129515994 | 0    | SMARCA1 |
| chr4:80335743-80420323   | 0    | nogene  |
| chr2:219541151-219541615 | 0    | CHPF    |
| chr19:17314022-17315995  | 0    | DDA1    |
| chr6:53071056-53076543   | 881  | FBXO9   |
| chr2:238182064-238184113 | 10   | ILKAP   |
| chr10:93387796-93389154  | 2    | MYOF    |
| chr4:98583518-98586087   | 27   | nogene  |
| chr16:67912855-67914144  | 18   | nogene  |
| chr19:19482813-19483551  | 7    | nogene  |
| chr3:145983607-145990927 | 15   | nogene  |
| chr4:2954423-2956811     | 73   | NOP14   |
| chr2:46145092-46151229   | 1    | PRKCE   |
| chr5:87331347-87353235   | 113  | RASA1   |
| chr14:90943077-90947550  | 29   | RPS6KA5 |
| chr11:63748374-63750198  | 0    | RTN3    |
| chr6:44932652-45365301   | 24   | SUPT3H  |
| chr2:28941460-28947161   | 16   | WDR43   |
| chr2:61493893-61495613   | 23   | XPO1    |
| chr7:148846496-148847305 | 95   | EZH2    |
| chr5:43675510-43702736   | 2    | NNT     |
| chr16:72096821-72097009  | 17   | DHX38   |
| chr10:49500537-49506012  | 166  | ERCC6   |



|                           |      |           |
|---------------------------|------|-----------|
| chr9:20907149-20916937    | 89   | FOCAD     |
| chr22:20446442-20471515   | 6    | KLHL22    |
| chr10:102057052-102057230 | 17   | nogene    |
| chr11:74203727-74222369   | 9    | PPME1     |
| chr21:37108391-37132766   | 34   | TTC3      |
| chr10:122392302-122424959 | 39   | PLEKHA1   |
| chr16:58532231-58534395   | 0    | CNOT1     |
| chr15:44484223-44499813   | 21   | CTDSPL2   |
| chr4:430343-437511        | 39   | nogene    |
| chr16:69260049-69270285   | 0    | SNTB2     |
| chr5:151786571-151803996  | 30   | G3BP1     |
| chr20:9217389-9365514     | 16   | PLCB4     |
| chr1:176081151-176149074  | 14   | RFWD2     |
| chr12:122377388-122380558 | 164  | CLIP1     |
| chr12:122920187-122921043 | 0    | ABCB9     |
| chr19:19042710-19044074   | 0    | ARMC6     |
| chr10:103049706-103056964 | 6    | CNNM2     |
| chr2:210129030-210154611  | 6    | KANSL1L   |
| chr4:4299926-4303091      | 16   | ZBTB49    |
| chr9:127658374-127661205  | 16   | STXBP1    |
| chr6:154441291-154442290  | 21   | CNKS3     |
| chr4:150798080-150817257  | 243  | LRBA      |
| chr5:113101738-113104355  | 18   | MCC       |
| chr3:183840569-183844326  | 2    | PARL      |
| chr3:112563384-112573956  | 2    | SLC35A5   |
| chr3:27376715-27424152    | 18   | SLC4A7    |
| chr2:159248371-159283093  | 1    | WDSUB1    |
| chr17:1258559-1259559     | 10   | nogene    |
| chr7:66795510-66797506    | 14   | RABGEF1   |
| chrX:68335242-68336551    | 0    | nogene    |
| chr3:4669653-4676801      | 0    | ITPR1     |
| chr1:112917177-112918044  | 24   | SLC16A1   |
| chr16:3791980-3793626     | 77   | CREBBP    |
| chr6:136866626-136870003  | 1    | PEX7      |
| chr12:100098351-100103951 | 28   | UHRF1BP1L |
| chr6:89335301-89342455    | 0    | UBE2J1    |
| chr18:23504370-23509279   | 0    | C18orf8   |
| chr2:69070646-69077488    | 7    | ANTXR1    |
| chr10:989997-990473       | 18   | nogene    |
| chr18:32111753-32113860   | 2789 | RNF138    |
| chr2:109585125-109585838  | 99   | 10-Sep    |
| chr2:230720455-230760115  | 29   | CAB39     |
| chr10:67932596-67941105   | 14   | HERC4     |

|                           |     |                        |
|---------------------------|-----|------------------------|
| chr1:155923626-155929840  | 14  | KIAA0907               |
| chr3:132603228-132619545  | 1   | NPHP3-ACAD11           |
| chr8:18011236-18011827    | 30  | PCM1                   |
| chr16:70526586-70529199   | 41  | SF3B3                  |
| chr1:28580559-28581229    | 619 | SNHG12                 |
| chr2:201749711-201754671  | 1   | ALS2                   |
| chr10:42791626-42793991   | 4   | BMS1                   |
| chr2:202952558-202954134  | 0   | CARF                   |
| chr7:134137022-134191751  | 13  | LRGUK                  |
| chr5:95490907-95495017    | 13  | TTC37                  |
| chr3:10234458-10239039    | 4   | IRAK2                  |
| chr12:45331294-45357424   | 98  | ANO6                   |
| chrX:68048415-68053810    | 4   | OPHN1                  |
| chr4:128992166-129082373  | 29  | SCLT1                  |
| chr14:35007282-35013902   | 0   | SRP54                  |
| chr7:100355142-100355804  | 293 | STAG3L5P-PVRIG2P-PILRB |
| chr10:27116059-27116345   | 2   | YME1L1                 |
| chr14:81185530-81216514   | 15  | GTF2A1                 |
| chr18:12999420-13030608   | 326 | CEP192                 |
| chr7:2213211-2222754      | 97  | MAD1L1                 |
| chr2:10600852-10607311    | 112 | NOL10                  |
| chr17:82763964-82768566   | 55  | TBCD                   |
| chr4:98881040-98891332    | 15  | EIF4E                  |
| chr19:9337795-9339319     | 70  | ZNF559                 |
| chr17:29489663-29491865   | 13  | TAOK1                  |
| chr15:99993047-99997589   | 16  | ADAMTS17               |
| chr11:108330213-108332037 | 4   | ATM                    |
| chr19:1969507-1969959     | 23  | CSNK1G2                |
| chr2:182962158-182967361  | 6   | NCKAP1                 |
| chr19:53521855-53576819   | 3   | nogene                 |
| chr2:69996685-70085624    | 2   | PCBP1-AS1              |
| chr15:64859893-64865228   | 6   | PLEKHO2                |
| chr3:40461406-40462248    | 145 | RPL14                  |
| chr7:98190727-98194572    | 11  | LMTK2                  |
| chr7:92343023-92362273    | 16  | ANKIB1                 |
| chr6:130955104-130956499  | 77  | EPB41L2                |
| chr12:104895273-104928694 | 6   | SLC41A2                |
| chr19:12810070-12810404   | 32  | RNASEH2A               |
| chr11:29106242-29211765   | 10  | nogene                 |
| chrX:64348659-64350070    | 4   | MTMR8                  |
| chr13:29324612-29359473   | 59  | MTUS2                  |
| chr2:44201185-44218537    | 47  | PPM1B                  |
| chr8:73582769-73739868    | 4   | STAU2                  |

|                           |     |              |
|---------------------------|-----|--------------|
| chr17:37246825-37253036   | 31  | ACACA        |
| chr2:36358903-36442735    | 149 | CRIM1        |
| chr6:57532410-57606457    | 38  | PRIM2        |
| chr9:33886880-33900271    | 48  | UBE2R2       |
| chr2:69849651-69871832    | 0   | GMCL1        |
| chr16:69840125-69842120   | 0   | WWP2         |
| chr7:22960255-22991139    | 947 | FAM126A      |
| chr12:7432415-7433694     | 62  | CD163L1      |
| chr4:904636-913668        | 17  | GAK          |
| chr10:102258928-102260116 | 36  | GBF1         |
| chr19:18934302-18939049   | 9   | HOMER3       |
| chr10:124774674-124790338 | 140 | METTL10      |
| chr3:37047518-37049017    | 28  | MLH1         |
| chr9:122270863-122280598  | 28  | MRRF         |
| chr11:19868924-19892594   | 15  | NAV2         |
| chr15:90937253-90937581   | 15  | nogene       |
| chr19:42247908-42248424   | 15  | nogene       |
| chr16:11933516-11937668   | 77  | nogene       |
| chr14:31093701-31094760   | 15  | nogene       |
| chr11:48069699-48070069   | 15  | nogene       |
| chr17:8256523-8256963     | 49  | PFAS         |
| chr3:48549863-48550234    | 20  | PFKFB4       |
| chr22:21486799-21488381   | 47  | PI4KAP2      |
| chr6:105368902-105377519  | 2   | PREP         |
| chr7:105508114-105508520  | 15  | PUS7         |
| chr7:66771882-66810847    | 78  | RABGEF1      |
| chr20:37056145-37068186   | 15  | RBL1         |
| chr5:94643272-94654752    | 34  | SLF1         |
| chr11:18506856-18509665   | 2   | TSG101       |
| chr17:67920014-67922990   | 27  | BPTF         |
| chr15:67231229-67236820   | 120 | AAGAB        |
| chr8:13098398-13100770    | 13  | DLC1         |
| chr1:225144521-225185425  | 15  | DNAH14       |
| chr10:21918778-21929141   | 21  | DNAJC1       |
| chr5:171910571-171914405  | 61  | FBXW11       |
| chr10:1005817-1009580     | 25  | GTPBP4       |
| chr10:68025545-68044563   | 438 | HERC4        |
| chr3:37503177-37542585    | 15  | ITGA9        |
| chr21:28212239-28228478   | 68  | LOC101927973 |
| chr4:150893051-150897818  | 0   | LRBA         |
| chr2:74207703-74211866    | 13  | MTHFD2       |
| chr11:62768351-62768619   | 15  | nogene       |
| chr14:61713935-61715603   | 13  | nogene       |

|                           |     |            |
|---------------------------|-----|------------|
| chr11:68519500-68551186   | 50  | PPP6R3     |
| chr7:66768830-66783841    | 0   | RABGEF1    |
| chr9:127912267-127912680  | 15  | ST6GALNAC4 |
| chr4:106095481-106212835  | 1   | TBCK       |
| chr15:66532246-66546705   | 26  | ZWILCH     |
| chr17:4064360-4067242     | 15  | ZZEF1      |
| chr18:12351084-12356831   | 18  | AFG3L2     |
| chr14:21415573-21429335   | 23  | CHD8       |
| chr1:219981377-219983398  | 1   | EPRS       |
| chrX:70341798-70387297    | 95  | KIF4A      |
| chr6:141704581-141705067  | 35  | nogene     |
| chr17:1344858-1345238     | 14  | nogene     |
| chr1:46066053-46080750    | 1   | PIK3R3     |
| chr17:50139604-50140092   | 13  | PPP1R9B    |
| chr1:43538197-43578920    | 41  | PTPRF      |
| chr3:47097954-47106120    | 259 | SETD2      |
| chr1:172600063-172602787  | 40  | SUCO       |
| chr18:62348112-62349937   | 15  | TNFRSF11A  |
| chr7:25142240-25142814    | 20  | C7orf31    |
| chr3:67746770-67768433    | 1   | SUCLG2-AS1 |
| chr3:156694019-156696025  | 265 | TIPARP     |
| chr2:113934278-113942359  | 3   | ACTR3      |
| chr14:58304943-58318805   | 16  | ARID4A     |
| chr8:123328189-123336532  | 15  | ATAD2      |
| chr6:26462796-26463525    | 14  | BTN2A1     |
| chr11:46769962-46770982   | 15  | CKAP5      |
| chr8:17234715-17237373    | 0   | CNOT7      |
| chr16:58184259-58196844   | 1   | CSNK2A2    |
| chr16:28723163-28735582   | 29  | EIF3C      |
| chr5:65988634-66014725    | 540 | ERBB2IP    |
| chr6:98899267-98927822    | 30  | FBXL4      |
| chr7:55982209-55983868    | 91  | GBAS       |
| chr12:109855618-109858741 | 15  | GLTP       |
| chr15:72350517-72353178   | 0   | HEXA       |
| chr10:132705192-132710456 | 15  | INPP5A     |
| chr3:45485691-45500579    | 3   | LARS2      |
| chr7:24661840-24668660    | 15  | MPP6       |
| chr13:29767098-29796911   | 1   | nogene     |
| chr15:82958974-82959308   | 27  | nogene     |
| chr5:151946638-152055452  | 18  | nogene     |
| chr11:29381241-29384112   | 15  | nogene     |
| chr13:32732100-32746100   | 45  | PDS5B      |
| chr7:66768830-66775393    | 36  | RABGEF1    |

|                           |     |         |
|---------------------------|-----|---------|
| chr3:8912311-8941804      | 15  | RAD18   |
| chr4:2490336-2500738      | 296 | RNF4    |
| chr6:88890494-88929267    | 0   | RNGTT   |
| chr12:123327425-123331375 | 18  | SBNO1   |
| chr14:30628208-30643405   | 16  | SCFD1   |
| chr19:20934948-20937361   | 13  | ZNF85   |
| chr22:23268407-23273774   | 0   | BCR     |
| chr8:67095292-67095732    | 102 | CSPP1   |
| chr21:46529091-46534687   | 18  | DIP2A   |
| chr13:49187121-49188633   | 19  | FNDC3A  |
| chr6:73111307-73169854    | 15  | KCNQ5   |
| chr5:140925895-140929325  | 7   | PCDHAC1 |
| chr17:64562770-64583544   | 16  | SMURF2  |
| chr1:11013715-11025208    | 17  | TARDBP  |
| chr20:13569506-13630152   | 56  | TASP1   |
| chr14:102424978-102428382 | 15  | TECPR2  |
| chr2:97158106-97167767    | 53  | ANKRD36 |
| chr6:83934594-83960029    | 1   | CYB5R4  |
| chr7:157339720-157367483  | 5   | DNAJB6  |
| chr8:42964310-42982696    | 18  | HOOK3   |
| chr3:121532989-121541479  | 35  | POLQ    |
| chr6:123252411-123267751  | 21  | TRDN    |
| chr3:122449573-122467429  | 32  | KPNA1   |
| chr2:88749980-88751082    | 0   | RPIA    |
| chr17:29285991-29287716   | 46  | NUFIP2  |
| chr9:125337017-125337591  | 413 | GAPVD1  |
| chr6:104744159-104750472  | 94  | HACE1   |
| chr7:66712166-66734928    | 0   | RABGEF1 |
| chr16:29798747-29798950   | 4   | KIF22   |
| chr3:15563357-15568586    | 13  | HACL1   |
| chr20:50940864-50945923   | 21  | DPM1    |
| chr12:116230432-116237705 | 351 | MED13L  |
| chr2:241325992-241336098  | 39  | 2-Sep   |
| chr9:77247258-77252352    | 6   | VPS13A  |
| chr1:100424221-100462881  | 15  | CDC14A  |
| chr3:71041327-71053773    | 109 | FOXP1   |
| chr1:43669099-43671875    | 1   | KDM4A   |
| chrX:24073600-24074959    | 15  | nogene  |
| chr1:204552180-204552423  | 42  | nogene  |
| chr6:34341861-34370492    | 57  | NUDT3   |
| chr1:233090060-233161363  | 15  | PCNXL2  |
| chr2:20307977-20333063    | 77  | PUM2    |
| chr19:11147817-11148113   | 105 | SPC24   |

|                           |     |              |
|---------------------------|-----|--------------|
| chr8:140023936-140252929  | 15  | TRAPPC9      |
| chr20:17952586-17955475   | 43  | SNX5         |
| chr4:159238808-159241368  | 7   | nogene       |
| chr12:16721-17859         | 13  | LOC100288778 |
| chr9:133412298-133412921  | 607 | REXO4        |
| chr1:145771710-145788966  | 17  | RNF115       |
| chr4:169155479-169156679  | 192 | SH3RF1       |
| chr10:120880825-120890009 | 26  | WDR11        |
| chr5:168360614-168371533  | 0   | WWC1         |
| chr19:45419097-45421393   | 40  | ERCC1        |
| chr5:141983379-141984933  | 0   | RNF14        |
| chr22:29358725-29367270   | 13  | AP1B1        |
| chr10:94245945-94246621   | 73  | PLCE1        |
| chr8:43097523-43103830    | 13  | POMK         |
| chr3:142748257-142748460  | 0   | TRPC1        |
| chr7:148846469-148847305  | 804 | EZH2         |
| chr4:145845955-145849561  | 172 | ZNF827       |
| chr17:76097795-76098018   | 0   | EXOC7        |
| chr9:4823547-4827033      | 141 | RCL1         |
| chr17:37284837-37289528   | 4   | ACACA        |
| chr7:127807483-127844424  | 15  | SND1         |
| chr1:70292387-70324957    | 13  | ANKRD13C     |
| chr6:33320010-33320591    | 17  | DAXX         |
| chr15:65490188-65507355   | 17  | DPP8         |
| chr6:167003722-167013567  | 17  | FGFR1OP      |
| chrX:152345580-152364596  | 3   | GABRA3       |
| chr11:33286412-33286952   | 43  | HIPK3        |
| chr1:63478763-63510181    | 13  | ITGB3BP      |
| chr8:23875895-23922600    | 17  | nogene       |
| chr10:100361465-100361621 | 2   | nogene       |
| chr17:81558146-81558664   | 17  | nogene       |
| chr2:120141978-120170783  | 17  | nogene       |
| chr16:2981377-2982882     | 2   | nogene       |
| chr20:58693736-58703071   | 17  | NPEPL1       |
| chr10:34450316-34493725   | 13  | PARD3        |
| chr20:37044085-37055656   | 17  | RBL1         |
| chr3:27420699-27452498    | 3   | SLC4A7       |
| chr3:67508806-67529186    | 13  | SUCLG2       |
| chr19:3013668-3015760     | 19  | TLE2         |
| chr22:40277076-40301333   | 0   | TNRC6B       |
| chr15:82404611-82415675   | 13  | UBE2Q2P2     |
| chr4:84739009-84740416    | 17  | WDFY3        |
| chr4:176096462-176139974  | 17  | WDR17        |

|                           |     |              |
|---------------------------|-----|--------------|
| chr10:1056347-1072293     | 18  | WDR37        |
| chr20:18297984-18298464   | 7   | ZNF133       |
| chr11:126364530-126381942 | 32  | nogene       |
| chr17:81567416-81572088   | 0   | NPLOC4       |
| chr17:4189381-4197577     | 1   | ANKFY1       |
| chr14:67352922-67353959   | 0   | ATP6V1D      |
| chr9:120545713-120568388  | 16  | CDK5RAP2     |
| chr16:80684537-80685129   | 281 | CDYL2        |
| chr8:11444030-11444808    | 32  | FAM167A      |
| chr6:5368549-5431172      | 14  | FARS2        |
| chr19:43900867-43901775   | 19  | LOC100505715 |
| chr1:85036709-85041177    | 0   | MCOLN3       |
| chr16:4650364-4657363     | 50  | MGRN1        |
| chr16:4651962-4652824     | 1   | MGRN1        |
| chr5:172125656-172126326  | 13  | nogene       |
| chr2:10644319-10668723    | 321 | NOL10        |
| chr1:19890384-19907660    | 0   | OTUD3        |
| chr13:24441845-24453654   | 1   | PARP4        |
| chr3:136260478-136283947  | 2   | PCCB         |
| chr5:134697898-134703932  | 63  | SEC24A       |
| chr5:128138596-128152805  | 48  | SLC12A2      |
| chr5:179823857-179825226  | 108 | SQSTM1       |
| chr11:75879878-75912039   | 86  | UVRAG        |
| chr6:31795272-31795545    | 50  | VARS         |
| chrX:118387339-118410959  | 20  | WDR44        |
| chr9:122865348-122883379  | 33  | RC3H2        |
| chrX:101035612-101041371  | 4   | TRMT2B       |
| chr8:61525976-61556022    | 6   | ASPH         |
| chr15:40608846-40619011   | 30  | CASC5        |
| chr16:67066681-67082339   | 94  | CBFB         |
| chrX:147921932-147936613  | 1   | FMR1         |
| chr20:18487887-18488353   | 0   | nogene       |
| chr11:59787036-59795482   | 2   | STX3         |
| chr5:60642811-60647533    | 47  | DEPDC1B      |
| chr1:54871349-54876047    | 5   | DHCR24       |
| chr5:94868332-94912976    | 6   | MCTP1        |
| chr11:93790573-93801972   | 37  | MED17        |
| chr8:103404775-103407784  | 287 | SLC25A32     |
| chr12:15956935-15982436   | 3   | DERA         |
| chr13:100330560-100340259 | 5   | PCCA         |
| chr5:43122038-43161931    | 18  | ZNF131       |
| chr2:108873450-108876442  | 30  | CCDC138      |
| chr17:81588943-81597316   | 37  | NPLOC4       |

|                           |     |          |
|---------------------------|-----|----------|
| chr4:128997873-129003876  | 56  | SCLT1    |
| chr15:64974601-64983593   | 134 | SPG21    |
| chr14:72993142-72993357   | 12  | ZFYVE1   |
| chr3:57847196-57858159    | 29  | SLMAP    |
| chr6:77271339-77273307    | 668 | nogene   |
| chr9:93629969-93649212    | 1   | PHF2     |
| chr11:111752158-111753577 | 15  | PPP2R1B  |
| chr2:9527785-9536828      | 11  | ADAM17   |
| chr17:42480666-42495716   | 2   | ATP6V0A1 |
| chr20:41533049-41551360   | 138 | CHD6     |
| chr1:200648438-200649226  | 0   | DDX59    |
| chr5:137692284-137709856  | 3   | KLHL3    |
| chr10:96944112-96952196   | 116 | LCOR     |
| chr11:47295495-47296055   | 2   | MADD     |
| chr5:25177590-25180826    | 20  | nogene   |
| chr17:47596352-47601747   | 0   | NPEPPS   |
| chr11:68583042-68596218   | 48  | PPP6R3   |
| chr19:49583206-49583952   | 0   | PRRG2    |
| chr6:138907494-138915976  | 17  | REPS1    |
| chr1:179347599-179348942  | 7   | SOAT1    |
| chr13:41865735-41912168   | 17  | VWA8     |
| chr13:111233204-111244294 | 14  | ARHGEF7  |
| chr6:156829226-156901525  | 50  | ARID1B   |
| chr6:38568436-38598121    | 15  | BTBD9    |
| chr9:128836801-128838367  | 0   | CCBL1    |
| chr5:123364495-123399284  | 15  | CEP120   |
| chr17:8238030-8238629     | 108 | CTC1     |
| chr9:19276157-19276479    | 23  | DENND4C  |
| chr19:32432715-32455040   | 2   | DPY19L3  |
| chr7:2360709-2372795      | 15  | EIF3B    |
| chr7:100819556-100820296  | 115 | EPHB4    |
| chr14:31113103-31114340   | 46  | HECTD1   |
| chr6:33664869-33665976    | 15  | ITPR3    |
| chr20:25467388-25470095   | 12  | NINL     |
| chr19:48980032-48980627   | 13  | nogene   |
| chr10:37729820-37749733   | 41  | nogene   |
| chr1:51814034-51834170    | 46  | NRD1     |
| chr3:170106831-170122744  | 0   | PHC3     |
| chr20:50579702-50579926   | 0   | PTPN1    |
| chr20:2986764-3007420     | 16  | PTPRA    |
| chr12:120546404-120546601 | 15  | RNF10    |
| chr1:213125765-213176492  | 15  | RPS6KC1  |
| chr4:109491326-109494856  | 303 | SEC24B   |



|                           |     |          |
|---------------------------|-----|----------|
| chr5:134157706-134174022  | 386 | SKP1     |
| chr9:121348014-121356156  | 14  | STOM     |
| chr1:95138274-95173889    | 29  | TMEM56   |
| chr4:119245336-119248882  | 4   | USP53    |
| chr3:183786124-183786301  | 15  | YEATS2   |
| chr12:133041099-133048848 | 0   | ZNF84    |
| chr4:145162639-145171720  | 57  | OTUD4    |
| chr22:26717252-26718231   | 15  | MIATNB   |
| chr3:196801926-196805383  | 8   | PAK2     |
| chr17:60288522-60345608   | 5   | USP32    |
| chr7:148786550-148790441  | 14  | CUL1     |
| chr22:39403830-39404132   | 13  | nogene   |
| chr4:38020590-38027879    | 21  | TBC1D1   |
| chr3:183715143-183728851  | 69  | YEATS2   |
| chr3:127793784-127794251  | 24  | nogene   |
| chr11:33141666-33161369   | 27  | CSTF3    |
| chr9:137206231-137216017  | 2   | NDOR1    |
| chr4:151352899-151353391  | 2   | nogene   |
| chr14:39177411-39177916   | 35  | PNN      |
| chr20:37061102-37062270   | 73  | RBL1     |
| chr2:61495454-61499894    | 36  | XPO1     |
| chr5:66053405-66054951    | 94  | ERBB2IP  |
| chr2:69806384-69812709    | 3   | ANXA4    |
| chr2:222928861-222934687  | 1   | ACSL3    |
| chr12:27368261-27376387   | 36  | ARNTL2   |
| chr1:235480053-235496308  | 193 | B3GALNT2 |
| chr2:171925536-171966949  | 20  | HAT1     |
| chr1:117460488-117502970  | 174 | MAN1A2   |
| chr6:112912876-112937686  | 9   | nogene   |
| chr11:11432620-11448936   | 35  | GALNT18  |
| chr19:7441652-7447168     | 0   | ARHGEF18 |
| chr1:93239309-93239896    | 15  | CCDC18   |
| chr16:58576462-58583182   | 30  | CNOT1    |
| chr2:171448680-171458075  | 83  | DCAF17   |
| chr15:76287845-76297348   | 0   | ETFA     |
| chr15:89268398-89276891   | 6   | FANCI    |
| chr12:100591735-100622382 | 78  | GAS2L3   |
| chr17:30484213-30492753   | 25  | GOSR1    |
| chr17:46066536-46094701   | 374 | KANSL1   |
| chr13:23756544-23809924   | 25  | MIPEP    |
| chr6:27951606-27958148    | 0   | nogene   |
| chr16:223343-223705       | 18  | nogene   |
| chr17:68115705-68115938   | 527 | nogene   |

|                           |     |          |
|---------------------------|-----|----------|
| chr5:79668891-79682061    | 10  | PAPD4    |
| chr10:34269656-34284245   | 460 | PARD3    |
| chr11:581491-592674       | 38  | PHRF1    |
| chr1:151303540-151306363  | 1   | PI4KB    |
| chr2:158533179-158603104  | 273 | PKP4     |
| chr10:119898426-119898959 | 1   | SEC23IP  |
| chr10:13333816-13345028   | 67  | SEPHS1   |
| chr16:22471627-22471852   | 8   | SMG1P1   |
| chr16:28979154-28982545   | 0   | SPNS1    |
| chr14:21364826-21373430   | 0   | SUPT16H  |
| chr5:1255286-1282624      | 0   | TERT     |
| chr14:102791205-102903429 | 16  | TRAF3    |
| chr11:35725923-35726163   | 42  | TRIM44   |
| chr12:122249870-122251099 | 15  | VPS33A   |
| chr2:223884647-223895630  | 12  | WDFY1    |
| chr20:47262287-47276795   | 118 | ZMYND8   |
| chr5:14293011-14316743    | 17  | TRIO     |
| chr11:65503853-65505019   | 2   | nogene   |
| chr13:50927406-50943394   | 20  | RNASEH2B |
| chr2:237973091-237994809  | 56  | UBE2F    |
| chr15:78157547-78169077   | 16  | IDH3A    |
| chr8:73582769-73617451    | 1   | STAU2    |
| chr2:23810315-23823569    | 13  | ATAD2B   |
| chr7:2229983-2230727      | 254 | MAD1L1   |
| chr5:109713519-109729513  | 750 | MAN2A1   |
| chr9:126392065-126421948  | 82  | MVB12B   |
| chr2:32197343-32209561    | 2   | SLC30A6  |
| chr2:177420268-177462018  | 23  | AGPS     |
| chrX:1285777-1290509      | 83  | CSF2RA   |
| chr13:59774188-59839448   | 2   | DIAPH3   |
| chr11:77379240-77379994   | 192 | PAK1     |
| chr12:89425160-89472275   | 26  | POC1B    |
| chr18:59466738-59471769   | 17  | CCBE1    |
| chr3:15563357-15573242    | 0   | HACL1    |
| chr10:45946836-45962994   | 55  | PARGP1   |
| chr4:145123214-145125101  | 14  | ABCE1    |
| chr19:1510149-1511160     | 11  | ADAMTSL5 |
| chr1:43197552-43199503    | 13  | CFAP57   |
| chr7:2239417-2239676      | 13  | FTSJ2    |
| chr11:58549785-58551232   | 3   | LPXN     |
| chr15:71888003-71893778   | 30  | MYO9A    |
| chr16:71669274-71676649   | 14  | PHLPP2   |
| chr1:15717892-15721388    | 185 | PLEKHM2  |

|                          |     |                 |
|--------------------------|-----|-----------------|
| chr1:62439798-62443319   | 14  | USP1            |
| chr1:94177611-94190083   | 14  | ARHGAP29        |
| chr17:63751939-63752799  | 27  | CCDC47          |
| chr8:60800387-60808272   | 38  | CHD7            |
| chr9:137564433-137565154 | 98  | DPH7            |
| chr14:76166662-76195972  | 147 | GPATCH2L        |
| chr5:179615545-179617911 | 14  | HNRNPH1         |
| chr11:65864496-65865145  | 14  | MUS81           |
| chr7:65403175-65403644   | 14  | nogene          |
| chr1:243270091-243286397 | 43  | SDCCAG8         |
| chr9:33956857-33963791   | 14  | UBAP2           |
| chr9:130862762-130863035 | 21  | ABL1            |
| chr5:177536357-177539042 | 39  | FAM193B         |
| chr11:47486749-47489024  | 4   | CELF1           |
| chr19:48985460-48986035  | 0   | GYS1            |
| chr5:43675510-43677806   | 64  | NNT             |
| chr3:3156218-3174261     | 42  | CRBN            |
| chr17:5460938-5462546    | 193 | DHX33           |
| chr12:50625975-50660319  | 4   | DIP2B           |
| chrX:24065997-24071727   | 15  | EIF2S3          |
| chr17:82763964-82893632  | 23  | TBCD            |
| chr9:33935838-33941862   | 4   | UBAP2           |
| chr22:42514105-42574818  | 94  | RRP7A           |
| chr17:39490556-39501439  | 7   | CDK12           |
| chr4:151454700-151482648 | 12  | FAM160A1        |
| chr3:45417481-45458886   | 16  | LARS2           |
| chr19:11727432-11727986  | 19  | nogene          |
| chr2:9410807-9411533     | 13  | nogene          |
| chr16:69718122-69718534  | 115 | NQO1            |
| chr3:196818056-196820567 | 8   | PAK2            |
| chr12:25995036-26003450  | 0   | RASSF8          |
| chr2:202206736-202220106 | 13  | SUMO1           |
| chr17:78700330-78709732  | 0   | CYTH1           |
| chr15:90803520-90804359  | 13  | BLM             |
| chr1:20757165-20771073   | 12  | HP1BP3          |
| chr22:33761370-33769743  | 27  | LARGE           |
| chr11:63850874-63851367  | 19  | nogene          |
| chr7:66771882-66783841   | 169 | RABGEF1         |
| chr5:141984802-141987975 | 0   | RNF14           |
| chr20:63928334-63931734  | 38  | DNAJC5          |
| chr12:65308528-65328603  | 32  | MSRB3           |
| chr4:147857552-147881932 | 410 | ARHGAP10        |
| chr5:140438460-140441142 | 0   | ANKHD1-EIF4EBP3 |

|                           |     |           |
|---------------------------|-----|-----------|
| chr18:26315228-26357794   | 47  | TAF4B     |
| chr22:40868998-40886515   | 16  | XPNPEP3   |
| chr4:88475840-88479507    | 37  | HERC5     |
| chr22:46433392-46439411   | 160 | CELSR1    |
| chr16:29610169-29610757   | 14  | nogene    |
| chr5:168557422-168568998  | 12  | PANK3     |
| chr4:39199477-39203722    | 14  | WDR19     |
| chr10:179993-249088       | 14  | ZMYND11   |
| chr9:129503322-129503672  | 4   | LINC00963 |
| chr17:82763964-82800996   | 74  | TBCD      |
| chr16:53154446-53157541   | 16  | CHD9      |
| chr15:51451644-51455228   | 37  | DMXL2     |
| chr3:183205875-183207823  | 205 | MCF2L2    |
| chr21:43630321-43633421   | 47  | HSF2BP    |
| chr2:86159535-86162079    | 86  | IMMT      |
| chr3:37294978-37302332    | 20  | GOLGA4    |
| chr7:27629370-27649623    | 1   | HIBADH    |
| chr7:5715052-5716766      | 14  | RNF216    |
| chr7:761752-770618        | 13  | DNAAF5    |
| chr4:75655065-75655870    | 0   | G3BP2     |
| chr16:11883014-11885274   | 2   | GSPT1     |
| chr3:195523691-195524896  | 13  | PPP1R2    |
| chr2:202464808-202552888  | 15  | BMPR2     |
| chr6:108323824-108347039  | 0   | LACE1     |
| chr17:12054888-12113360   | 152 | MAP2K4    |
| chr6:3154519-3225432      | 29  | nogene    |
| chr7:5480864-5485820      | 26  | nogene    |
| chr1:16164470-16168253    | 6   | nogene    |
| chr1:10403070-10404279    | 82  | PGD       |
| chr1:99993536-99999415    | 63  | SLC35A3   |
| chr3:12489783-12496554    | 55  | TSEN2     |
| chr3:9810620-9817759      | 1   | TTLL3     |
| chr3:51440969-51443903    | 105 | VPRBP     |
| chr14:102325984-102335838 | 21  | ZNF839    |
| chr12:6655637-6656798     | 16  | ING4      |
| chr10:124777061-124777777 | 15  | nogene    |
| chr6:75844896-75862723    | 0   | MYO6      |
| chr2:28901986-28906581    | 52  | WDR43     |
| chr4:168890921-168903906  | 10  | PALLD     |
| chr3:56566949-56571302    | 17  | CCDC66    |
| chr8:141185138-141190417  | 10  | DENND3    |
| chr5:50399106-50411383    | 668 | EMB       |
| chr5:119473907-119479021  | 0   | HSD17B4   |

|                           |     |           |
|---------------------------|-----|-----------|
| chr9:6805598-6814745      | 1   | KDM4C     |
| chr1:113127852-113129039  | 17  | nogene    |
| chr12:110538143-110551968 | 30  | PPTC7     |
| chr17:32182756-32183272   | 21  | RHOT1     |
| chr6:10935057-10956242    | 49  | SYCP2L    |
| chr19:34451980-34467014   | 71  | UBA2      |
| chr3:188484591-188490641  | 29  | LPP       |
| chr1:213071005-213104569  | 5   | RPS6KC1   |
| chr11:128986002-128988125 | 0   | ARHGAP32  |
| chrX:63665885-63706449    | 3   | ARHGEF9   |
| chr11:33583337-33598947   | 17  | KIAA1549L |
| chr11:47634671-47639051   | 1   | MTCH2     |
| chr10:68488466-68493570   | 39  | SLC25A16  |
| chr2:28906459-28917995    | 84  | WDR43     |
| chr7:5216562-5217187      | 4   | WIPI2     |
| chr4:87046165-87047594    | 610 | AFF1      |
| chr6:52267864-52269226    | 123 | MCM3      |
| chr10:68206769-68210547   | 58  | MYPN      |
| chr15:73122524-73136027   | 30  | NEO1      |
| chr2:55646258-55647453    | 2   | PNPT1     |
| chr2:213340162-213364145  | 15  | SPAG16    |
| chr17:54985613-55007597   | 0   | STXBP4    |
| chr1:42194889-42323827    | 16  | FOXJ3     |
| chr19:3425105-3452666     | 47  | NFIC      |
| chr10:68722454-68747275   | 14  | CCAR1     |
| chr3:113399905-113427339  | 14  | CFAP44    |
| chr7:846239-846436        | 25  | nogene    |
| chrX:123686547-123697751  | 39  | THOC2     |
| chr17:59808795-59817773   | 15  | VMP1      |
| chr10:115215696-115315736 | 0   | ATRNL1    |
| chr7:133317283-133375002  | 10  | EXOC4     |
| chr16:16007815-16016621   | 57  | ABCC1     |
| chr20:34031521-34078553   | 0   | RALY      |
| chr12:28198942-28259442   | 1   | CCDC91    |
| chr6:157148623-157150853  | 19  | ARID1B    |
| chr2:23884764-23888399    | 18  | ATAD2B    |
| chr2:159448241-159453801  | 0   | BAZ2B     |
| chr19:48231659-48241063   | 24  | CARD8     |
| chr6:109140420-109146937  | 52  | CEP57L1   |
| chr5:50399106-50403454    | 54  | EMB       |
| chr9:20715321-20765073    | 29  | FOCAD     |
| chr2:69342151-69363670    | 0   | GFPT1     |
| chr17:30484213-30510909   | 1   | GOSR1     |

|                           |     |          |
|---------------------------|-----|----------|
| chr10:91460426-91462184   | 10  | HECTD2   |
| chr2:27470927-27472362    | 17  | IFT172   |
| chr2:39299742-39315388    | 0   | MAP4K3   |
| chr19:12079094-12079397   | 17  | nogene   |
| chrX:71554512-71557672    | 17  | OGT      |
| chr20:20524405-20536784   | 0   | RALGAPA2 |
| chr6:151445307-151445825  | 15  | RMND1    |
| chr3:47678197-47686170    | 52  | SMARCC1  |
| chr7:2255000-2278305      | 0   | SNX8     |
| chr20:49135832-49166285   | 34  | STAU1    |
| chr12:51103669-51116420   | 0   | TFCP2    |
| chr12:98527885-98537572   | 63  | TMPO     |
| chr20:3121383-3123406     | 0   | UBOX5    |
| chr1:246435944-246440124  | 39  | nogene   |
| chr15:68189202-68193645   | 0   | nogene   |
| chrX:68192918-68213972    | 0   | OPHN1    |
| chr11:77626561-77626801   | 38  | nogene   |
| chr18:31897785-31913522   | 1   | TRAPPC8  |
| chr13:26612960-26676724   | 19  | WASF3    |
| chr6:47283937-47286595    | 181 | TNFRSF21 |
| chr22:43926939-43940125   | 0   | PNPLA3   |
| chr2:231270981-231296253  | 5   | ARMC9    |
| chr7:140776911-140787584  | 52  | BRAF     |
| chr11:93725650-93727637   | 0   | CEP295   |
| chr17:63578469-63589237   | 5   | DCAF7    |
| chr2:47834578-47834871    | 23  | FBXO11   |
| chr1:37574342-37576556    | 27  | GNL2     |
| chr5:1494699-1501603      | 15  | LPCAT1   |
| chr13:29281703-29359473   | 30  | MTUS2    |
| chr10:72708282-72741845   | 5   | nogene   |
| chr16:15698070-15698562   | 14  | nogene   |
| chr8:94743307-94743727    | 21  | nogene   |
| chr12:128808787-128815070 | 259 | SLC15A4  |
| chr13:29514352-29553860   | 106 | SLC7A1   |
| chr9:127435089-127436003  | 15  | ZNF79    |
| chr11:46808030-46809874   | 62  | CKAP5    |
| chr14:23061083-23064488   | 15  | ACIN1    |
| chr22:25672295-25695214   | 3   | ADRBK2   |
| chr22:25594298-25644665   | 14  | ADRBK2   |
| chr1:65190709-65224870    | 16  | AK4      |
| chr1:243637610-243695716  | 10  | AKT3     |
| chr17:4209823-4235890     | 26  | ANKFY1   |
| chr5:14741826-14751239    | 19  | ANKH     |

|                           |     |              |
|---------------------------|-----|--------------|
| chr9:97994630-98015517    | 26  | ANP32B       |
| chr5:73832337-73840760    | 72  | ARHGEF28     |
| chr2:9356046-9368519      | 77  | ASAP2        |
| chr2:175111567-175118369  | 8   | ATF2         |
| chr18:31630958-31666372   | 9   | B4GALT6      |
| chr2:28127586-28129380    | 0   | BRE          |
| chr9:135850136-135866536  | 153 | CAMSAP1      |
| chr22:37510211-37518108   | 14  | CARD10       |
| chr1:100484291-100504937  | 16  | CDC14A       |
| chr10:14825478-14828272   | 0   | CDNF         |
| chr3:138498030-138537347  | 14  | CEP70        |
| chr3:138525489-138537347  | 81  | CEP70        |
| chr1:16628467-16633346    | 13  | CROCCP2      |
| chr11:107416208-107418287 | 52  | CWF19L2      |
| chr1:100196213-100206636  | 4   | DBT          |
| chr2:232087486-232087721  | 38  | DIS3L2       |
| chr1:224952673-225007544  | 16  | DNAH14       |
| chr7:157409794-157416255  | 0   | DNAJB6       |
| chr7:34973513-35018596    | 14  | DPY19L1      |
| chr5:31448546-31451640    | 97  | DROSHA       |
| chr6:52423686-52454287    | 19  | EFHC1        |
| chr9:137743370-137754291  | 14  | EHMT1        |
| chr6:53269086-53276256    | 39  | ELOVL5       |
| chr16:70465125-70468968   | 14  | FUK          |
| chr3:158681994-158691648  | 30  | GFM1         |
| chrX:84321841-84361612    | 20  | HDX          |
| chr11:43798319-43816391   | 16  | HSD17B12     |
| chr5:133064979-133070496  | 156 | HSPA4        |
| chr1:116613764-116616457  | 14  | IGSF3        |
| chr19:7141676-7163199     | 16  | INSR         |
| chr3:4516475-4521094      | 14  | ITPR1        |
| chr6:18207397-18217885    | 17  | KDM1B        |
| chr7:152220522-152222682  | 15  | KMT2C        |
| chr2:185729328-185788943  | 2   | LOC101927196 |
| chr3:37121491-37149038    | 15  | LRRFIP2      |
| chr7:1898199-1936897      | 38  | MAD1L1       |
| chr3:183309715-183311772  | 16  | MCF2L2       |
| chr6:109446695-109447229  | 16  | MICAL1       |
| chr2:96360142-96367373    | 14  | NCAPH        |
| chr15:55869578-55874008   | 14  | NEDD4        |
| chr9:14146688-14180866    | 4   | NFIB         |
| chr19:19427695-19427992   | 16  | nogene       |
| chr14:74735983-74736325   | 57  | nogene       |

|                          |     |          |
|--------------------------|-----|----------|
| chr5:85821331-85827796   | 14  | nogene   |
| chr17:62474354-62476831  | 18  | nogene   |
| chr6:17646066-17649300   | 50  | NUP153   |
| chr2:174123594-174142000 | 26  | OLA1     |
| chr2:205440369-205440672 | 149 | PARD3B   |
| chr3:130703722-130708492 | 14  | PIK3R4   |
| chr1:52404680-52412624   | 16  | PRPF38A  |
| chr9:131430089-131432794 | 267 | PRRC2B   |
| chr18:8076454-8247919    | 14  | PTPRM    |
| chr12:69784719-69801721  | 3   | RAB3IP   |
| chr1:32672449-32672901   | 0   | RBBP4    |
| chr20:37020658-37022826  | 16  | RBL1     |
| chr17:75651185-75666620  | 8   | RECQL5   |
| chr1:246726891-246767329 | 16  | SCCPDH   |
| chr3:185590113-185613408 | 7   | SENP2    |
| chr14:99412950-99465813  | 21  | SETD3    |
| chr11:66058829-66059045  | 16  | SF3B2    |
| chr18:12420324-12433000  | 16  | SLMO1    |
| chr16:18815174-18834438  | 16  | SMG1     |
| chr1:179335505-179337896 | 2   | SOAT1    |
| chr2:230357804-230359132 | 11  | SP140L   |
| chr1:1561331-1564916     | 186 | SSU72    |
| chr6:147260614-147278204 | 27  | STXBP5   |
| chr19:45844029-45854507  | 16  | SYMPK    |
| chr2:9910735-9919820     | 14  | TAF1B    |
| chr20:13559007-13580981  | 117 | TASP1    |
| chr11:12764178-12795367  | 16  | TEAD1    |
| chr4:38986335-38998909   | 4   | TMEM156  |
| chr6:11565665-11567535   | 14  | TMEM170B |
| chr19:16679983-16680581  | 10  | TMEM38A  |
| chr8:91008742-91021404   | 2   | TMEM55A  |
| chr7:128997388-129015135 | 14  | TNPO3    |
| chr8:140347756-140405698 | 25  | TRAPPC9  |
| chr17:59079753-59088407  | 2   | TRIM37   |
| chr8:58434394-58439770   | 0   | UBXN2B   |
| chr3:179701007-179721589 | 0   | USP13    |
| chr2:58048826-58139832   | 16  | VRK2     |
| chr6:169582835-169627708 | 14  | WDR27    |
| chr7:5199575-5214704     | 16  | WIPI2    |
| chr6:38061592-38116739   | 8   | ZFAND3   |
| chr6:57124254-57142095   | 16  | ZNF451   |
| chr15:64499292-64623052  | 6   | ZNF609   |
| chr15:51563380-51576181  | 18  | DMXL2    |



|                           |      |          |
|---------------------------|------|----------|
| chr16:68121986-68126610   | 1839 | NFATC3   |
| chr3:8935870-8941804      | 323  | RAD18    |
| chr13:23353784-23365277   | 14   | SACS     |
| chr2:28926467-28929710    | 14   | WDR43    |
| chr19:44007010-44010397   | 14   | ZNF230   |
| chr19:32615657-32625966   | 43   | ANKRD27  |
| chr17:66129745-66183307   | 8    | CEP112   |
| chr17:6589778-6590630     | 14   | KIAA0753 |
| chr6:89751430-89762530    | 264  | MDN1     |
| chr7:6634970-6636235      | 29   | nogene   |
| chr14:35721687-35742565   | 14   | RALGAPA1 |
| chr12:120782654-120791557 | 35   | SPPL3    |
| chr2:219601715-219601966  | 14   | STK11IP  |
| chr9:77381975-77407607    | 131  | VPS13A   |
| chr9:100470634-100516771  | 21   | TMEFF1   |
| chr11:73707419-73730823   | 82   | RAB6A    |
| chr19:11175901-11176817   | 0    | KANK2    |
| chr14:57209566-57229881   | 18   | EXOC5    |
| chr22:16611657-16614178   | 81   | TPTEP1   |
| chr11:47486749-47500932   | 17   | CELF1    |
| chr11:67215339-67215949   | 3    | KDM2A    |
| chr3:11358417-11477268    | 3    | ATG7     |
| chr16:47463898-47515601   | 89   | PHKB     |
| chr7:128579998-128592017  | 76   | nogene   |
| chr10:103091563-103094455 | 4    | NT5C2    |
| chr8:108229028-108240098  | 34   | nogene   |
| chr10:102872447-102874661 | 26   | AS3MT    |
| chr2:144141881-144145739  | 4    | GTDC1    |
| chr1:202909009-202911203  | 0    | KLHL12   |
| chr3:131462689-131471279  | 15   | MRPL3    |
| chr8:53769617-53772167    | 23   | ATP6V1H  |
| chr19:47750177-47752607   | 0    | GLTSCR2  |
| chr8:124516610-124517185  | 25   | nogene   |
| chr5:72848384-72855923    | 0    | TNPO1    |
| chr9:79612655-79654075    | 142  | TLE4     |
| chr21:36208714-36212097   | 14   | DOPEY2   |
| chr3:120002045-120093593  | 3    | GSK3B    |
| chr17:46170854-46172232   | 523  | KANSL1   |
| chr13:30227411-30255615   | 61   | KATNAL1  |
| chr1:32154587-32158361    | 16   | KPNA6    |
| chr11:96091891-96093517   | 47   | MAML2    |
| chr17:36509061-36511455   | 236  | MYO19    |
| chr6:75886003-75886994    | 20   | MYO6     |

|                          |     |           |
|--------------------------|-----|-----------|
| chr2:183001952-183003325 | 82  | NCKAP1    |
| chr19:35763790-35764373  | 18  | nogene    |
| chr11:3691346-3695606    | 7   | NUP98     |
| chr1:228213440-228215829 | 0   | OBSCN     |
| chr8:100706650-100706997 | 227 | PABPC1    |
| chr7:105142007-105146658 | 0   | SRPK2     |
| chr3:11807832-11829864   | 6   | TAMM41    |
| chr2:74046277-74048411   | 104 | TET3      |
| chrX:47887998-47895940   | 5   | ZNF81     |
| chr20:49074784-49091022  | 59  | CSE1L     |
| chr19:5616131-5616486    | 25  | SAFB2     |
| chr11:65504819-65505019  | 5   | nogene    |
| chr11:62533660-62536567  | 14  | AHNAK     |
| chr1:113901235-113901885 | 14  | AP4B1     |
| chr2:27221217-27226962   | 14  | CAD       |
| chr4:184631036-184638468 | 0   | CASP3     |
| chr3:48174283-48183030   | 14  | CDC25A    |
| chr9:123757702-123769563 | 54  | DENND1A   |
| chr7:103319755-103322632 | 14  | DNAJC2    |
| chr2:232556415-232567214 | 12  | EIF4E2    |
| chr5:176486354-176489027 | 0   | FAF2      |
| chr8:42906172-42964474   | 14  | HOOK3     |
| chr1:63478763-63508570   | 114 | ITGB3BP   |
| chr12:48659904-48660619  | 157 | KANSL2    |
| chr8:17331149-17349081   | 14  | MTMR7     |
| chr12:78021746-78059115  | 91  | NAV3      |
| chr10:12368607-12369147  | 18  | nogene    |
| chr11:65436537-65444063  | 126 | nogene    |
| chr2:183151507-183182680 | 48  | NUP35     |
| chr1:113724758-113726574 | 40  | PHTF1     |
| chr3:196069454-196077122 | 18  | TFRC      |
| chr17:68429995-68434626  | 0   | WIPI1     |
| chr4:343781-344430       | 30  | ZNF141    |
| chr15:44328684-44380976  | 91  | CASC4     |
| chr3:121468304-121473487 | 17  | POLQ      |
| chr19:41220858-41221107  | 20  | AXL       |
| chr19:32948265-32953801  | 25  | CEP89     |
| chr7:8003907-8024814     | 40  | GLCCI1    |
| chr17:80048582-80050283  | 46  | CCDC40    |
| chr5:112234633-112266330 | 18  | EPB41L4A  |
| chr18:36834319-36959435  | 21  | KIAA1328  |
| chr7:65726770-65732055   | 2   | LOC441242 |
| chrX:10523091-10567603   | 1   | MID1      |

|                           |     |          |
|---------------------------|-----|----------|
| chr16:68157868-68174514   | 26  | NFATC3   |
| chr7:92489292-92489911    | 41  | PEX1     |
| chr19:9566335-9569082     | 47  | ZNF121   |
| chr5:14741826-14758598    | 89  | ANKH     |
| chr6:41840892-41891875    | 2   | USP49    |
| chr19:29971192-30005708   | 28  | URI1     |
| chr14:30633946-30638247   | 30  | SCFD1    |
| chr14:50741581-50744365   | 3   | NIN      |
| chr10:75882655-75883525   | 13  | C10orf11 |
| chr8:123019194-123030716  | 93  | DERL1    |
| chr8:108228266-108240075  | 0   | EIF3E    |
| chr14:49709158-49743805   | 1   | KLHDC1   |
| chr2:33257442-33280158    | 14  | LTBP1    |
| chr19:45021082-45021669   | 14  | nogene   |
| chr1:219970120-219970531  | 14  | nogene   |
| chr17:64644163-64644470   | 14  | nogene   |
| chr5:115539664-115542901  | 11  | nogene   |
| chr5:132591223-132595810  | 21  | RAD50    |
| chr15:66502611-66503164   | 14  | RPL4     |
| chr7:98915722-98917679    | 35  | TRRAP    |
| chr9:128325142-128325881  | 18  | COQ4     |
| chr1:43538197-43553941    | 86  | PTPRF    |
| chr11:70354300-70356254   | 280 | PPFIA1   |
| chr8:123333877-123336532  | 297 | ATAD2    |
| chr3:197847408-197854445  | 1   | LRCH3    |
| chr6:75840584-75841378    | 77  | MYO6     |
| chr1:156755536-156767495  | 0   | nogene   |
| chr8:140252776-140360193  | 0   | TRAPPC9  |
| chr4:73090666-73097272    | 0   | ANKRD17  |
| chr12:48083590-48101516   | 7   | SENP1    |
| chr21:26021839-26112146   | 0   | APP      |
| chrX:63643979-63678572    | 1   | ARHGEF9  |
| chr15:59104693-59107670   | 0   | CCNB2    |
| chr3:170280226-170281968  | 0   | PRKCI    |
| chr4:176711498-176740765  | 28  | VEGFC    |
| chr15:84646183-84653699   | 0   | WDR73    |
| chr6:56535121-56536940    | 0   | DST      |
| chr1:241896958-241909063  | 0   | nogene   |
| chr1:6616756-6620337      | 2   | PHF13    |
| chr6:79042842-79063910    | 2   | PHIP     |
| chr10:97743093-97744915   | 11  | ZFYVE27  |
| chr12:131753122-131756644 | 17  | SFSWAP   |
| chr16:53235184-53247503   | 3   | CHD9     |

|                           |      |             |
|---------------------------|------|-------------|
| chr11:73707419-73718890   | 685  | RAB6A       |
| chr19:1270866-1272051     | 2    | CIRBP       |
| chr11:73000989-73015885   | 77   | FCHSD2      |
| chr10:87059149-87062835   | 1    | GLUD1       |
| chr3:188490421-188524787  | 20   | LPP         |
| chr17:50979745-50987237   | 7    | SPAG9       |
| chr15:43021274-43025429   | 97   | UBR1        |
| chr1:40514514-40515918    | 4    | EXO5        |
| chr16:1724556-1729578     | 38   | MAPK8IP3    |
| chr8:144160969-144200541  | 2    | MROH1       |
| chr5:6616726-6625669      | 26   | NSUN2       |
| chr8:39090046-39091346    | 10   | ADAM9       |
| chr14:34775918-34783232   | 15   | BAZ1A       |
| chr1:9755113-9756510      | 15   | CLSTN1      |
| chr11:108673466-108723462 | 21   | DDX10       |
| chr13:107598840-107789110 | 15   | FAM155A-IT1 |
| chr5:74780362-74841679    | 20   | FAM169A     |
| chr11:62626859-62627353   | 15   | GANAB       |
| chr10:133398434-133399619 | 6    | MTG1        |
| chr6:111469195-111474476  | 15   | nogene      |
| chr3:196257787-196270541  | 6    | PCYT1A      |
| chr16:71658232-71658815   | 16   | PHLPP2      |
| chr12:122508217-122508447 | 15   | RSRC2       |
| chr15:76504858-76665789   | 1    | SCAPER      |
| chr17:77402058-77402703   | 335  | 9-Sep       |
| chr11:62824165-62825539   | 0    | STX5        |
| chr21:32694227-32702047   | 20   | SYNJ1       |
| chr13:75326196-75362607   | 1    | TBC1D4      |
| chr11:11903262-11920494   | 15   | USP47       |
| chr8:134564986-134610655  | 0    | ZFAT        |
| chr6:57124733-57134870    | 39   | ZNF451      |
| chr19:37150834-37170054   | 15   | ZNF585A     |
| chr10:27060344-27061242   | 3    | ANKRD26     |
| chr3:37281957-37302332    | 61   | GOLGA4      |
| chr15:65016435-65023794   | 0    | MTFMT       |
| chr10:28595732-28596041   | 19   | WAC         |
| chr1:176135009-176163891  | 18   | RFWD2       |
| chr15:72771782-72775097   | 172  | ADPGK       |
| chr13:31269213-31286819   | 31   | B3GLCT      |
| chr8:42048377-42049707    | 332  | KAT6A       |
| chr3:197090911-197119530  | 396  | DLG1        |
| chr1:43538197-43569778    | 28   | PTPRF       |
| chr2:61522610-61533903    | 1658 | XPO1        |

|                           |      |                        |
|---------------------------|------|------------------------|
| chr5:40852173-40854096    | 0    | CARD6                  |
| chr5:128134164-128141981  | 0    | SLC12A2                |
| chr17:42211983-42217464   | 0    | STAT5B                 |
| chr15:50449399-50459162   | 74   | USP8                   |
| chr6:36593088-36593371    | 16   | nogene                 |
| chr7:100355142-100356883  | 0    | STAG3L5P-PVRIG2P-PILRB |
| chr16:11846500-11846843   | 92   | RSL1D1                 |
| chr4:80583092-80648987    | 0    | C4orf22                |
| chr6:5368549-5404701      | 29   | FARS2                  |
| chr17:47663088-47668410   | 248  | KPNB1                  |
| chr6:75879819-75886994    | 1    | MYO6                   |
| chr9:109050282-109064567  | 150  | TMEM245                |
| chr18:24123833-24125550   | 7    | TTC39C                 |
| chr16:1685438-1698843     | 0    | HN1L                   |
| chr2:32488587-32493667    | 96   | BIRC6                  |
| chr10:130079565-130079901 | 0    | LINC00959              |
| chr4:148152468-148154901  | 11   | NR3C2                  |
| chr1:112581991-112584126  | 14   | ST7L                   |
| chr14:51568349-51570410   | 4    | FRMD6                  |
| chr1:233090060-233095863  | 182  | PCNXL2                 |
| chr14:21211809-21263336   | 5    | HNRNPC                 |
| chr8:43064100-43077364    | 40   | FNTA                   |
| chr22:23791755-23793688   | 41   | SMARCB1                |
| chr10:68142939-68161752   | 38   | MYPN                   |
| chr4:139071865-139073567  | 29   | ELF2                   |
| chr4:165310552-165310750  | 55   | KLHL2                  |
| chr8:140311247-140360193  | 0    | TRAPPC9                |
| chr22:32478980-32479275   | 296  | FBXO7                  |
| chr4:47875126-47910994    | 28   | NFXL1                  |
| chr13:24475471-24478276   | 1189 | PARP4                  |
| chr8:43158574-43172386    | 18   | HGSNAT                 |
| chr6:44113886-44116629    | 1902 | MRPL14                 |
| chr16:24540611-24553557   | 14   | RBBP6                  |
| chr4:113232160-113242209  | 0    | ANK2                   |
| chr14:92096092-92096838   | 31   | ATXN3                  |
| chr5:119105179-119121139  | 18   | DMXL1                  |
| chr16:2234170-2235001     | 0    | E4F1                   |
| chr12:1027747-1116033     | 16   | ERC1                   |
| chr5:179617513-179617911  | 0    | HNRNPH1                |
| chr10:37735131-37739714   | 40   | nogene                 |
| chr18:51058124-51059916   | 7    | SMAD4                  |
| chr3:196073929-196075360  | 113  | TFRC                   |
| chr15:70690453-70699660   | 0    | UACA                   |

|                           |     |              |
|---------------------------|-----|--------------|
| chr15:74655732-74675142   | 24  | EDC3         |
| chr11:85996825-86007583   | 11  | PICALM       |
| chr6:100644030-100647451  | 20  | ASCC3        |
| chr21:29327280-29329693   | 8   | BACH1        |
| chr2:214728917-214769312  | 14  | BARD1        |
| chr4:184398914-184429070  | 1   | IRF2         |
| chr7:152247901-152252715  | 14  | KMT2C        |
| chr10:17700190-17705741   | 14  | STAM         |
| chr7:22492564-22495480    | 58  | STEAP1B      |
| chr3:67495797-67520634    | 5   | SUCLG2       |
| chr6:167890861-167902386  | 2   | MLLT4        |
| chr11:66816052-66822674   | 16  | C11orf80     |
| chr14:80895717-80906081   | 248 | CEP128       |
| chr3:197104902-197119530  | 864 | DLG1         |
| chr1:153635129-153635523  | 13  | nogene       |
| chr19:40623603-40624082   | 78  | LTBP4        |
| chr11:78528841-78571444   | 75  | NARS2        |
| chr9:105534492-105539351  | 37  | FSD1L        |
| chr19:15170085-15170825   | 5   | NOTCH3       |
| chr19:44118187-44118574   | 0   | ZNF225       |
| chr7:66551524-66576932    | 1   | GS1-124K5.11 |
| chr5:73832337-73852692    | 110 | ARHGEF28     |
| chr13:23858859-23870195   | 68  | MIPEP        |
| chr22:37806220-37806579   | 13  | nogene       |
| chr10:27158548-27160138   | 1   | MASTL        |
| chr2:203138161-203138748  | 2   | NBEAL1       |
| chr2:27599582-27601442    | 230 | ZNF512       |
| chr6:73730343-73736508    | 1   | CD109        |
| chr1:147252622-147268878  | 15  | CHD1L        |
| chr2:9428764-9443661      | 0   | CPSF3        |
| chr10:12084539-12091684   | 0   | DHTKD1       |
| chr15:49319603-49328130   | 0   | GALK2        |
| chr1:186451178-186470395  | 29  | LOC102724919 |
| chr5:171394451-171394902  | 27  | nogene       |
| chr11:66657135-66661335   | 0   | nogene       |
| chr12:68648698-68654252   | 10  | RAP1B        |
| chr9:96392397-96398314    | 47  | ZNF367       |
| chr12:11121009-11124187   | 67  | nogene       |
| chr6:34967238-34970166    | 0   | ANKS1A       |
| chr10:72203426-72213331   | 2   | ASCC1        |
| chr2:32478634-32500109    | 28  | BIRC6        |
| chr18:79728906-79736521   | 73  | CTDP1        |
| chr11:126272968-126273454 | 12  | FOXRED1      |

|                           |      |           |
|---------------------------|------|-----------|
| chr2:37049652-37053607    | 0    | HEATR5B   |
| chr1:117405548-117420649  | 6    | MAN1A2    |
| chr18:58165787-58252054   | 14   | NEDD4L    |
| chr2:185950643-185952902  | 4    | nogene    |
| chr3:52112698-52138302    | 0    | POC1A     |
| chr19:55236642-55247109   | 0    | PPP6R1    |
| chr10:16752538-16754989   | 121  | RSU1      |
| chrX:135994785-135998968  | 20   | SLC9A6    |
| chr1:162599270-162601514  | 16   | UAP1      |
| chr10:86453219-86460496   | 4    | WAPL      |
| chr11:70419745-70425401   | 1    | CTTN      |
| chr20:35801490-35871829   | 4    | PHF20     |
| chrX:123888618-123892773  | 25   | XIAP      |
| chr13:46356431-46359631   | 0    | KIAA0226L |
| chr6:44932652-45014891    | 14   | SUPT3H    |
| chr11:120447873-120475507 | 16   | ARHGEF12  |
| chr1:179393902-179395202  | 16   | AXDND1    |
| chr10:68749135-68749685   | 5    | CCAR1     |
| chr4:99908710-99923185    | 1    | DNAJB14   |
| chr11:72984087-73015885   | 36   | FCHSD2    |
| chr6:35597247-35642843    | 10   | FKBP5     |
| chr10:87049400-87051870   | 1    | GLUD1     |
| chr8:28970042-28980156    | 14   | HMBOX1    |
| chr2:85027888-85049648    | 29   | KCMF1     |
| chr2:31883385-31943383    | 31   | MEMO1     |
| chr5:151795236-151796312  | 16   | nogene    |
| chr1:96769702-96785254    | 16   | PTBP2     |
| chr19:7267344-7267896     | 2    | INSR      |
| chr5:141638794-141640445  | 5    | RELL2     |
| chr21:26089942-26112146   | 25   | APP       |
| chr6:110667433-110746201  | 63   | CDK19     |
| chr11:103215720-103223086 | 4    | DYNC2H1   |
| chr5:142135729-142140629  | 2    | NDFIP1    |
| chr10:15128349-15130312   | 29   | NMT2      |
| chr9:100052416-100060172  | 41   | ERP44     |
| chr5:43294690-43298134    | 0    | HMGCS1    |
| chr19:1510149-1510917     | 75   | ADAMTSL5  |
| chr1:35913841-35914274    | 13   | AGO1      |
| chr21:25954589-26000182   | 6    | APP       |
| chr14:102959630-102964650 | 17   | CDC42BPB  |
| chr9:120467859-120471878  | 13   | CDK5RAP2  |
| chr4:1225359-1241519      | 1010 | CTBP1     |
| chr10:127018709-127061776 | 24   | DOCK1     |

|                           |     |                |
|---------------------------|-----|----------------|
| chr8:116726015-116737287  | 42  | EIF3H          |
| chr20:34440154-34457474   | 19  | ITCH           |
| chr17:16149450-16171995   | 16  | NCOR1          |
| chr17:18704618-18705164   | 61  | nogene         |
| chr10:103427328-103434975 | 13  | PDCD11         |
| chr21:34094862-34125480   | 17  | SLC5A3         |
| chr18:51046919-51067187   | 49  | SMAD4          |
| chr12:64042789-64043575   | 14  | SRGAP1         |
| chr4:6923372-7001251      | 64  | TBC1D14        |
| chr14:67806544-67809289   | 3   | ZFYVE26        |
| chr11:74132843-74139828   | 46  | C2CD3          |
| chr2:235750353-235807331  | 129 | AGAP1          |
| chr2:222630112-222648795  | 20  | FARSB          |
| chr10:21713771-21727928   | 116 | MLLT10         |
| chr2:119317465-119340361  | 13  | C2orf76        |
| chr9:137743391-137758011  | 13  | EHMT1          |
| chr9:2804256-2812362      | 39  | KIAA0020       |
| chr13:20731840-20732121   | 17  | N6AMT2         |
| chr2:70051202-70085903    | 13  | PCBP1-AS1      |
| chr3:50093719-50105709    | 23  | RBM5           |
| chr3:184913518-184920198  | 13  | VPS8           |
| chr12:111792060-111792782 | 0   | ALDH2          |
| chr11:100941783-100949956 | 13  | ARHGAP42       |
| chr8:1876570-1885707      | 77  | ARHGEF10       |
| chr3:93995873-94039988    | 13  | ARL13B         |
| chr12:111509548-111513539 | 13  | ATXN2          |
| chr13:36248605-36256167   | 0   | CCDC169-SOHLH2 |
| chr7:6430479-6436533      | 25  | DAGLB          |
| chrX:2291501-2425304      | 0   | DHR SX         |
| chr7:103321931-103322794  | 0   | DNAJC2         |
| chr5:126914929-126918227  | 77  | 3-Mar          |
| chr12:65306862-65369026   | 6   | MSRB3          |
| chr20:32930397-32931336   | 42  | nogene         |
| chr2:97490434-97491145    | 13  | nogene         |
| chr11:73909398-73919032   | 8   | PAAF1          |
| chr3:52678499-52682233    | 9   | PBRM1          |
| chr3:196257787-196283538  | 10  | PCYT1A         |
| chr1:20648314-20649353    | 24  | PINK1-AS       |
| chr1:151139424-151140090  | 2   | SEMA6C         |
| chr7:99051356-99052446    | 0   | SMURF1         |
| chr17:58999380-59017424   | 32  | TRIM37         |
| chr9:6477621-6500709      | 0   | UHRF2          |
| chr3:179719939-179730709  | 72  | USP13          |



|                           |     |              |
|---------------------------|-----|--------------|
| chr16:3977481-3983440     | 24  | ADCY9        |
| chr16:56401732-56414344   | 65  | AMFR         |
| chrX:77557450-77593849    | 117 | ATRX         |
| chr6:105115685-105116868  | 19  | BVES         |
| chr17:82127691-82134194   | 28  | CCDC57       |
| chr1:243191017-243225321  | 13  | CEP170       |
| chr15:78593091-78593628   | 30  | CHRNA5       |
| chr17:7448578-7448788     | 7   | CHRNB1       |
| chr16:58585337-58599511   | 48  | CNOT1        |
| chr2:210556718-210582709  | 13  | CPS1         |
| chr7:6432788-6435020      | 0   | DAGLB        |
| chr2:227893794-227898281  | 4   | DAW1         |
| chr3:98881539-98892606    | 12  | DCBLD2       |
| chrX:154764898-154770879  | 21  | DKC1         |
| chr12:63644402-63647365   | 161 | DPY19L2      |
| chr16:22225653-22225975   | 218 | EEF2K        |
| chr4:139137629-139168042  | 0   | ELF2         |
| chr20:46380252-46394532   | 13  | ELMO2        |
| chr5:176486354-176496663  | 5   | FAF2         |
| chr10:5726884-5735546     | 14  | FAM208B      |
| chr11:72981277-72989097   | 0   | FCHSD2       |
| chr2:53728711-53750941    | 10  | GPR75-ASB3   |
| chr10:67992198-67992682   | 7   | HERC4        |
| chr2:38573209-38591648    | 1   | HNRNPLL      |
| chr9:6849506-6893232      | 36  | KDM4C        |
| chrX:45010960-45020730    | 36  | KDM6A        |
| chr10:96907264-96949295   | 31  | LCOR         |
| chr9:22723308-22768403    | 2   | LINC01239    |
| chr3:139398860-139423114  | 14  | LOC100507291 |
| chr4:150798080-150849575  | 36  | LRBA         |
| chr2:39299742-39333574    | 13  | MAP4K3       |
| chr7:24623665-24649764    | 2   | MPP6         |
| chr13:41316845-41323190   | 13  | NAA16        |
| chr3:27162700-27174833    | 0   | NEK10        |
| chr16:47109482-47134410   | 117 | NETO2        |
| chr11:102350345-102378157 | 0   | nogene       |
| chr17:15503097-15516659   | 1   | nogene       |
| chr19:19133738-19134358   | 21  | nogene       |
| chr4:4086657-4087339      | 40  | nogene       |
| chr6:129502604-129540542  | 0   | nogene       |
| chr3:38198721-38236961    | 6   | OXR1         |
| chr19:39168229-39169757   | 13  | PAK4         |
| chr7:11051611-11111467    | 19  | PHF14        |

|                           |      |          |
|---------------------------|------|----------|
| chr6:79015081-79026164    | 42   | PHIP     |
| chr2:189794848-189795951  | 13   | PMS1     |
| chr18:9570156-9577191     | 20   | PPP4R1   |
| chr14:61443110-61457679   | 3    | PRKCH    |
| chr8:18867673-18872733    | 50   | PSD3     |
| chr12:121416158-121417911 | 76   | RNF34    |
| chr1:92320598-92324375    | 33   | RPAP2    |
| chr19:5641593-5641946     | 142  | SAFB     |
| chr19:5604582-5616486     | 14   | SAFB2    |
| chr12:123323679-123330509 | 0    | SBNO1    |
| chr21:33559229-33569087   | 7    | SON      |
| chr3:136443286-136464988  | 16   | STAG1    |
| chr17:31993241-31995762   | 25   | SUZ12    |
| chr15:78044899-78054187   | 81   | TBC1D2B  |
| chr5:1279290-1282624      | 14   | TERT     |
| chr9:100308499-100321771  | 13   | TEX10    |
| chr21:31164961-31203012   | 55   | TIAM1    |
| chr1:179846106-179852811  | 13   | TOR1AIP2 |
| chr7:23506137-23507535    | 0    | TRA2A    |
| chr5:14270824-14316743    | 51   | TRIO     |
| chr3:3137259-3140648      | 118  | TRNT1    |
| chr17:3580456-3592383     | 0    | TRPV1    |
| chr3:41835863-41935940    | 14   | ULK4     |
| chr2:85619219-85630946    | 16   | USP39    |
| chr6:169582835-169602321  | 13   | WDR27    |
| chr3:101652495-101654821  | 5    | ZBTB11   |
| chr3:141368620-141405887  | 24   | ZBTB38   |
| chr11:110136662-110153058 | 21   | ZC3H12C  |
| chr1:52477707-52489035    | 2    | ZCCHC11  |
| chr10:97744728-97753182   | 1    | ZFYVE27  |
| chr8:130358016-130361771  | 3239 | ASAP1    |
| chr13:59911734-59916249   | 16   | DIAPH3   |
| chr1:28010946-28017239    | 34   | EYA3     |
| chr9:113198854-113206578  | 13   | FKBP15   |
| chr3:52912537-52913617    | 3    | SFMBT1   |
| chr20:49264715-49266266   | 48   | ZNFX1    |
| chr16:56470002-56470791   | 6    | OGFOD1   |
| chr16:58574608-58575129   | 61   | CNOT1    |
| chr6:13639562-13657276    | 24   | RANBP9   |
| chr2:73557219-73559142    | 83   | ALMS1    |
| chr7:2362644-2363760      | 16   | EIF3B    |
| chr3:32441839-32454542    | 61   | CMTM7    |
| chr22:32406661-32408833   | 0    | RTCB     |

|                           |      |          |
|---------------------------|------|----------|
| chr2:121582156-121582823  | 19   | nogene   |
| chr4:2662837-2672372      | 48   | FAM193A  |
| chr1:47368468-47376872    | 1    | CMPK1    |
| chr5:179709872-179724783  | 20   | CANX     |
| chr7:23345939-23361741    | 30   | IGF2BP3  |
| chr14:31562067-31787873   | 0    | NUBPL    |
| chr7:72938589-72939968    | 0    | POM121   |
| chr12:125102678-125114557 | 3    | AACS     |
| chr16:70264957-70268379   | 14   | AARS     |
| chr10:68786135-68786692   | 29   | CCAR1    |
| chr2:101257790-101262691  | 4    | CNOT11   |
| chr10:5794884-5800705     | 1184 | GDI2     |
| chr14:76177987-76180849   | 13   | GPATCH2L |
| chr14:21211405-21234229   | 14   | HNRNPC   |
| chr6:73077321-73133641    | 13   | KCNQ5    |
| chr7:134137022-134158159  | 0    | LRGUK    |
| chr9:137646335-137651037  | 13   | nogene   |
| chr13:26593607-26613538   | 0    | nogene   |
| chr15:91915992-91916458   | 17   | SLCO3A1  |
| chr10:17771308-17776170   | 0    | TMEM236  |
| chr14:52511239-52544371   | 75   | TXNDC16  |
| chr9:83682950-83686155    | 144  | UBQLN1   |
| chr1:165890203-165891322  | 357  | UCK2     |
| chr19:47086383-47090189   | 13   | ZC3H4    |
| chr1:244477540-244518698  | 0    | C1orf101 |
| chr17:16139007-16143696   | 50   | NCOR1    |
| chr3:149846010-149895570  | 1    | RNF13    |
| chr14:90644047-90658387   | 3    | TTC7B    |
| chr3:187038741-187051346  | 30   | ST6GAL1  |
| chr7:67098540-67101430    | 29   | TYW1     |
| chr12:111679150-111683307 | 58   | BRAP     |
| chr2:69854822-69864975    | 1    | GMCL1    |
| chr3:188609160-188609844  | 94   | LPP      |
| chr18:58165787-58333892   | 1    | NEDD4L   |
| chr8:124490432-124490892  | 46   | nogene   |
| chr9:41025763-41027092    | 5    | PGM5P2   |
| chr5:170892386-170924550  | 86   | RANBP17  |
| chr1:2395783-2399514      | 2    | RER1     |
| chr18:163307-204692       | 1    | USP14    |
| chr18:196636-199316       | 110  | USP14    |
| chr3:195301574-195302174  | 76   | ACAP2    |
| chr7:107248395-107298346  | 0    | COG5     |
| chr15:94356136-94385525   | 0    | MCTP2    |

|                           |     |             |
|---------------------------|-----|-------------|
| chr7:28101618-28105070    | 3   | nogene      |
| chr2:128097428-128104014  | 36  | UGGT1       |
| chrX:63343205-63345571    | 1   | nogene      |
| chr3:17372074-17376613    | 1   | TBC1D5      |
| chr2:27987992-28051648    | 0   | BRE         |
| chr15:75407054-75414311   | 1   | SIN3A       |
| chr21:39236594-39250889   | 15  | BRWD1       |
| chr17:30792439-30804108   | 9   | CRLF3       |
| chr12:132795851-132813419 | 15  | GOLGA3      |
| chr22:35419883-35423341   | 15  | MCM5        |
| chr9:69220886-69221496    | 15  | TJP2        |
| chr11:120431770-120437382 | 2   | ARHGEF12    |
| chr5:154871729-154872651  | 33  | CNOT8       |
| chr22:50372019-50406875   | 34  | PPP6R2      |
| chr11:119273867-119285566 | 26  | CBL         |
| chr2:169544720-169557297  | 108 | FASTKD1     |
| chr6:169672254-169689308  | 27  | WDR27       |
| chr11:66485172-66488007   | 0   | DPP3        |
| chr6:82210813-82211572    | 12  | IBTK        |
| chr12:111509548-111555919 | 16  | ATXN2       |
| chr7:1936686-1980541      | 34  | MAD1L1      |
| chr17:7563065-7570933     | 1   | SEN3-EIF4A1 |
| chr7:43595900-43626586    | 0   | STK17A      |
| chr19:5604582-5604936     | 616 | SAFB2       |
| chr12:124863594-124913774 | 14  | SCARB1      |
| chr3:196071395-196077122  | 23  | TFRC        |
| chr5:150010110-150018697  | 12  | HMGXB3      |
| chr10:13172375-13175681   | 71  | MCM10       |
| chr10:4830674-4908420     | 38  | AKR1E2      |
| chr1:243563719-243573048  | 1   | AKT3        |
| chr8:130214555-130401970  | 29  | ASAP1       |
| chr14:35832977-35834923   | 0   | BRMS1L      |
| chr11:66759042-66788269   | 1   | C11orf80    |
| chr12:4517060-4525583     | 16  | C12orf4     |
| chr1:186406082-186419077  | 5   | C1orf27     |
| chrX:101101057-101120784  | 27  | CENPI       |
| chr4:186633683-186639783  | 13  | FAT1        |
| chr11:72849754-72868026   | 0   | FCHSD2      |
| chr5:43292473-43297673    | 0   | HMGCS1      |
| chr4:150761782-150808398  | 101 | LRBA        |
| chr20:51516783-51523596   | 13  | NFATC2      |
| chrX:71300222-71300708    | 23  | nogene      |
| chr3:122536167-122540852  | 2   | PARP9       |

|                           |     |           |
|---------------------------|-----|-----------|
| chr9:41039610-41053899    | 7   | PGM5P2    |
| chr10:97656284-97656974   | 8   | PI4K2A    |
| chr4:105446382-105453642  | 13  | PPA2      |
| chr7:66775226-66795592    | 0   | RABGEF1   |
| chr20:37040152-37047190   | 32  | RBL1      |
| chr20:49945381-49949355   | 115 | RNF114    |
| chr3:49691129-49704756    | 0   | RNF123    |
| chr22:41866830-41871035   | 4   | SREBF2    |
| chr2:135313488-135315530  | 14  | ZRANB3    |
| chr18:14262074-14265668   | 0   | nogene    |
| chr8:123333877-123339446  | 24  | ATAD2     |
| chr14:21426127-21429335   | 74  | CHD8      |
| chr17:39439164-39443628   | 52  | MED1      |
| chr11:108301647-108304852 | 87  | ATM       |
| chr4:40934455-40945070    | 86  | APBB2     |
| chr2:206127796-206130242  | 387 | NDUFS1    |
| chr9:33351559-33352719    | 90  | NFX1      |
| chr20:34029768-34031604   | 372 | RALY      |
| chr12:109102838-109103611 | 74  | UNG       |
| chr2:227491546-227494933  | 0   | AGFG1     |
| chr7:4740837-4741023      | 18  | FOXK1     |
| chr15:71999850-72046634   | 29  | MYO9A     |
| chr12:14612878-14619916   | 3   | PLBD1-AS1 |
| chr6:129611532-129618852  | 28  | ARHGAP18  |
| chr17:61058503-61084564   | 0   | BCAS3     |
| chr9:94923985-94928531    | 34  | C9orf3    |
| chr5:115236389-115253255  | 73  | PGGT1B    |
| chr5:136153591-136154163  | 79  | SMAD5     |
| chr10:84380097-84477664   | 24  | CCSER2    |
| chr21:45175729-45204736   | 19  | ADARB1    |
| chr15:89801110-89806809   | 1   | ANPEP     |
| chr10:72196810-72213331   | 79  | ASCC1     |
| chr9:114235598-114243560  | 1   | COL27A1   |
| chr14:39313339-39327022   | 38  | CTAGE5    |
| chr3:186786501-186787264  | 53  | EIF4A2    |
| chr9:20881870-20933132    | 2   | FOCAD     |
| chr7:138894341-138912460  | 42  | KIAA1549  |
| chr6:13639562-13658832    | 21  | RANBP9    |
| chr17:2186662-2188515     | 30  | SMG6      |
| chr6:42632551-42637194    | 19  | UBR2      |
| chr21:43669883-43673955   | 26  | RRP1B     |
| chr2:69505568-69643274    | 13  | AAK1      |
| chr2:203355153-203402734  | 13  | ABI2      |

|                           |     |              |
|---------------------------|-----|--------------|
| chr3:154187684-154217958  | 13  | ARHGEF26     |
| chr11:46667772-46669532   | 0   | ATG13        |
| chr1:235458602-235470960  | 6   | B3GALNT2     |
| chr14:105252506-105286376 | 25  | BRF1         |
| chr21:41942146-41943752   | 13  | C2CD2        |
| chr2:29167475-29197036    | 1   | CLIP4        |
| chr1:41001028-41003176    | 13  | CTPS1        |
| chr7:66573384-66576929    | 94  | GS1-124K5.11 |
| chr10:67932596-67936235   | 17  | HERC4        |
| chr12:122597730-122624688 | 13  | KNTC1        |
| chr13:48077152-48090418   | 21  | MED4         |
| chr4:153350063-153409015  | 13  | MND1         |
| chr1:28480450-28480604    | 13  | PHACTR4      |
| chr9:95476033-95485874    | 13  | PTCH1        |
| chr19:32990513-32996220   | 2   | RHPN2        |
| chr18:70086612-70114599   | 0   | RTTN         |
| chr3:170359698-170384765  | 13  | SKIL         |
| chr20:447888-448074       | 0   | TBC1D20      |
| chr16:67820838-67821225   | 13  | TSNAXIP1     |
| chr2:128183674-128187614  | 38  | UGGT1        |
| chr3:179730188-179730709  | 13  | USP13        |
| chr20:49264715-49271750   | 0   | ZNFX1        |
| chr2:23875828-23888399    | 28  | ATAD2B       |
| chr18:13008455-13030608   | 13  | CEP192       |
| chr6:43206006-43206510    | 46  | CUL9         |
| chr2:232014834-232087721  | 18  | DIS3L2       |
| chr17:49716164-49717714   | 0   | FAM117A      |
| chr15:49281986-49292537   | 0   | GALK2        |
| chr16:74451054-74459789   | 13  | GLG1         |
| chr6:24456497-24472636    | 13  | GPLD1        |
| chr10:17599289-17604047   | 13  | HACD1        |
| chr15:63745726-63747858   | 13  | HERC1        |
| chr5:133091192-133092789  | 348 | HSPA4        |
| chr7:140113490-140120529  | 0   | KDM7A        |
| chr1:32036909-32045390    | 0   | KHDRBS1      |
| chr18:36959315-37067545   | 13  | KIAA1328     |
| chr11:28077006-28094800   | 16  | KIF18A       |
| chr19:11110651-11113762   | 0   | LDLR         |
| chr3:37094791-37129149    | 0   | LRRFIP2      |
| chr22:20551435-20568631   | 13  | MED15        |
| chr21:36338778-36344707   | 414 | MORC3        |
| chr17:17175292-17177412   | 2   | MPRIIP       |
| chr12:27714779-27737608   | 100 | MRPS35       |

|                           |     |          |
|---------------------------|-----|----------|
| chr2:203175146-203188589  | 18  | NBEAL1   |
| chr5:137757866-137759020  | 27  | nogene   |
| chr18:8731496-8731754     | 31  | nogene   |
| chr5:60962740-60962980    | 13  | nogene   |
| chr19:1005754-1006098     | 20  | nogene   |
| chr3:23954536-23956125    | 7   | NR1D2    |
| chr14:67692437-67693052   | 13  | RDH11    |
| chr4:75969295-75971458    | 13  | SDAD1    |
| chr11:62853800-62855466   | 0   | SNHG1    |
| chrX:71421308-71424238    | 64  | TAF1     |
| chr8:123109316-123120188  | 13  | TBC1D31  |
| chr15:64406329-64409828   | 13  | TRIP4    |
| chr10:86470991-86473973   | 61  | WAPL     |
| chr19:18573292-18573748   | 100 | UBA52    |
| chr10:125110989-125111882 | 2   | CTBP2    |
| chr5:176350612-176355749  | 29  | KIAA1191 |
| chr14:74672830-74676752   | 1   | AREL1    |
| chr3:136980465-136995556  | 45  | IL20RB   |
| chrX:80288905-80310233    | 160 | CHMP1B2P |
| chr9:128185546-128187934  | 52  | CIZ1     |
| chr1:85029105-85045362    | 1   | MCOLN3   |
| chr4:2596083-2596329      | 16  | nogene   |
| chr7:44425899-44427703    | 96  | NUDCD3   |
| chr1:151264831-151267339  | 0   | PSMD4    |
| chr1:21001198-21050994    | 42  | EIF4G3   |
| chr2:203366876-203394846  | 0   | ABI2     |
| chr4:142260491-142305537  | 4   | INPP4B   |
| chr15:63690540-63694894   | 1   | HERC1    |
| chr22:29636750-29639212   | 110 | NF2      |
| chr14:96833466-96876120   | 20  | VRK1     |
| chr2:230169046-230170761  | 0   | SP110    |
| chr2:215312497-215349249  | 0   | ATIC     |
| chr4:22375729-22392690    | 14  | ADGRA3   |
| chr14:76171842-76180849   | 74  | GPATCH2L |
| chr6:4999808-5002245      | 14  | RPP40    |
| chr12:56169528-56170208   | 17  | SMARCC2  |
| chr2:58048826-58123233    | 15  | VRK2     |
| chr17:37243370-37246976   | 2   | ACACA    |
| chr5:75653141-75666993    | 0   | ANKDD1B  |
| chrX:65075473-65113813    | 368 | nogene   |
| chr19:37738902-37740194   | 24  | ZNF573   |
| chr11:992502-994245       | 19  | AP2A2    |
| chr1:156976982-156986173  | 49  | ARHGEF11 |

|                          |     |           |
|--------------------------|-----|-----------|
| chr2:214767481-214781509 | 159 | BARD1     |
| chr16:69136695-69143389  | 98  | CIRH1A    |
| chr4:77742140-77756951   | 2   | CNOT6L    |
| chr10:484780-486530      | 81  | DIP2C     |
| chr1:44308309-44352925   | 0   | ERI3      |
| chr10:92504793-92508205  | 14  | IDE       |
| chr9:85822879-85840849   | 2   | LOC389765 |
| chr18:58696365-58700591  | 206 | MALT1     |
| chr12:62493914-62501698  | 3   | MON2      |
| chr4:139334173-139341069 | 13  | NAA15     |
| chr2:182952404-182953331 | 68  | NCKAP1    |
| chr12:32729737-32730134  | 13  | nogene    |
| chr12:67318683-67349398  | 45  | nogene    |
| chr11:69316833-69341678  | 26  | nogene    |
| chr7:9708000-9719071     | 20  | nogene    |
| chr3:179198749-179230376 | 13  | PIK3CA    |
| chr7:108479183-108491467 | 1   | PNPLA8    |
| chr20:34017409-34031604  | 4   | RALY      |
| chr5:171213618-171242820 | 16  | RANBP17   |
| chr3:78714396-78717883   | 53  | ROBO1     |
| chr17:80730559-80791509  | 4   | RPTOR     |
| chr4:109530288-109533685 | 15  | SEC24B    |
| chr10:7276891-7285954    | 698 | SFMBT2    |
| chr17:19542392-19551468  | 68  | SLC47A1   |
| chr9:2493074-2539552     | 13  | VLDLR-AS1 |
| chr1:12400180-12403973   | 13  | VPS13D    |
| chr3:142355400-142365366 | 13  | XRN1      |
| chr13:19835476-19837821  | 13  | ZMYM5     |
| chr20:47262287-47283648  | 40  | ZMYND8    |
| chr5:119101934-119116336 | 42  | DMXL1     |
| chr10:68142939-68148467  | 7   | MYPN      |
| chr6:42603587-42617507   | 2   | UBR2      |
| chr17:29467144-29482288  | 13  | TAOK1     |
| chr1:154227281-154228725 | 3   | UBAP2L    |
| chr19:4475274-4475583    | 25  | HDGFRP2   |
| chr12:7403534-7436602    | 26  | CD163L1   |
| chr5:647804-655584       | 23  | CEP72     |
| chr4:103547853-103552602 | 6   | nogene    |
| chr12:27368261-27403541  | 63  | ARNTL2    |
| chr8:53743576-53756656   | 0   | ATP6V1H   |
| chr8:90017123-90021056   | 0   | DECR1     |
| chr22:31758545-31768863  | 62  | DEPDC5    |
| chr22:31447425-31450360  | 56  | EIF4ENIF1 |



|                           |     |           |
|---------------------------|-----|-----------|
| chr4:165238777-165263359  | 16  | KLHL2     |
| chr7:152309965-152330742  | 14  | KMT2C     |
| chr9:137255906-137272222  | 0   | NELFB     |
| chr5:137757866-137758314  | 0   | nogene    |
| chr1:117112094-117120901  | 0   | nogene    |
| chr13:24494572-24498229   | 0   | PARP4     |
| chr11:14771936-14819209   | 19  | PDE3B     |
| chr7:77893607-77901920    | 0   | PHTF2     |
| chr10:73444724-73454489   | 0   | PPP3CB    |
| chr1:213117316-213129889  | 96  | RPS6KC1   |
| chr3:196899665-196900412  | 31  | SENP5     |
| chr5:33460901-33463825    | 54  | TARS      |
| chr20:18297984-18306393   | 25  | ZNF133    |
| chr16:71745143-71746692   | 19  | AP1G1     |
| chr11:108248932-108257606 | 1   | ATM       |
| chr15:22903705-22912275   | 14  | CYFIP1    |
| chr1:197583151-197611976  | 31  | DENND1B   |
| chr11:33591236-33618662   | 13  | KIAA1549L |
| chr6:80326536-80353897    | 14  | nogene    |
| chr3:37010833-37011224    | 13  | nogene    |
| chr5:134847571-134848380  | 13  | nogene    |
| chr19:3965540-3965774     | 15  | nogene    |
| chr19:43181361-43259688   | 5   | nogene    |
| chr19:35762018-35762356   | 38  | PROSER3   |
| chr16:24553512-24556447   | 0   | RBBP6     |
| chr1:176116623-176184692  | 17  | RFWD2     |
| chr18:2771532-2775924     | 14  | SMCHD1    |
| chr17:63340100-63355390   | 7   | TANC2     |
| chr17:64193558-64195095   | 3   | TEX2      |
| chr2:61481184-61485962    | 13  | XPO1      |
| chr2:71355718-71368528    | 0   | ZNF638    |
| chr16:67036638-67082339   | 603 | CBFB      |
| chr1:24919239-24929852    | 15  | RUNX3     |
| chr4:142402937-142462726  | 7   | INPP4B    |
| chr6:157110471-157167185  | 3   | ARID1B    |
| chr10:32469624-32474023   | 0   | CCDC7     |
| chr3:96972606-96987993    | 9   | EPHA6     |
| chr9:13216773-13224583    | 2   | MPDZ      |
| chr5:80767932-80792844    | 134 | MSH3      |
| chr1:236850343-236863554  | 14  | MTR       |
| chr18:58341037-58343103   | 11  | NEDD4L    |
| chr7:96156839-96157550    | 13  | nogene    |
| chr13:28669590-28669897   | 13  | nogene    |

|                           |     |          |
|---------------------------|-----|----------|
| chr11:77332729-77349287   | 1   | PAK1     |
| chr13:41907585-41954024   | 1   | VWA8     |
| chr2:71396140-71418639    | 356 | ZNF638   |
| chr19:32714249-32714692   | 18  | nogene   |
| chr17:37283266-37284970   | 4   | ACACA    |
| chr18:9182381-9211784     | 2   | ANKRD12  |
| chr12:63644402-63663845   | 78  | DPY19L2  |
| chr9:86033281-86040868    | 26  | GOLM1    |
| chr1:172817552-172851482  | 2   | nogene   |
| chr9:123169901-123173842  | 15  | STRBP    |
| chr4:87183202-87195690    | 39  | KLHL8    |
| chr20:36244696-36244926   | 15  | AAR2     |
| chr22:29349217-29351266   | 0   | AP1B1    |
| chr17:60460662-60461915   | 0   | APPBP2   |
| chr2:43912431-43925961    | 144 | LRPPRC   |
| chr15:41291117-41291523   | 6   | nogene   |
| chr9:128600079-128605477  | 16  | SPTAN1   |
| chr8:98703086-98707311    | 0   | STK3     |
| chr6:57379900-57402268    | 7   | PRIM2    |
| chr12:109980951-109983694 | 11  | GIT2     |
| chr5:154790324-154795319  | 9   | LARP1    |
| chr12:56562416-56571855   | 282 | RBMS2    |
| chr19:41419134-41423169   | 1   | BCKDHA   |
| chr15:99287256-99334129   | 1   | LRRC28   |
| chr7:2437803-2439330      | 7   | nogene   |
| chr20:35801490-35842744   | 5   | PHF20    |
| chr8:140283888-140311374  | 0   | TRAPPC9  |
| chr17:56844018-56845809   | 54  | DGKE     |
| chr16:89977638-89978878   | 1   | AFG3L1P  |
| chr8:1880047-1903451      | 13  | ARHGEF10 |
| chr6:100715461-100800504  | 13  | ASCC3    |
| chr2:151841667-151842088  | 15  | CACNB4   |
| chr12:7430205-7433694     | 2   | CD163L1  |
| chr1:160313989-160325652  | 1   | COPA     |
| chr7:87163494-87181341    | 13  | DMTF1    |
| chr2:201016990-201022932  | 0   | FAM126B  |
| chr2:69356495-69363670    | 19  | GFPT1    |
| chr5:154790324-154800042  | 36  | LARP1    |
| chr21:36333645-36345031   | 15  | MORC3    |
| chr4:118636225-118636517  | 13  | nogene   |
| chr14:73287109-73297285   | 2   | NUMB     |
| chr8:127855154-127939676  | 13  | PVT1     |
| chr1:11013715-11020599    | 13  | TARDBP   |

|                           |     |          |
|---------------------------|-----|----------|
| chr12:27368261-27377564   | 151 | ARNTL2   |
| chr6:35619095-35637158    | 26  | FKBP5    |
| chr10:68910306-68919981   | 2   | DDX50    |
| chr9:130086419-130092381  | 2   | GPR107   |
| chr2:84839148-84842007    | 28  | TRABD2A  |
| chr15:45040407-45043421   | 25  | SORD     |
| chr11:10028451-10042981   | 8   | SBF2     |
| chr17:82756164-82768566   | 67  | TBCD     |
| chr2:121757239-121763084  | 103 | TSN      |
| chr20:24968891-24973737   | 3   | APMAP    |
| chr6:141829735-141927055  | 8   | nogene   |
| chr14:73083493-73088161   | 19  | RBM25    |
| chr7:38795464-38796864    | 1   | VPS41    |
| chr5:95895627-95919545    | 14  | ELL2     |
| chr7:32489248-32490766    | 2   | LSM5     |
| chr6:43546570-43558591    | 14  | XPO5     |
| chrX:132281094-132283032  | 19  | nogene   |
| chr19:19104912-19106385   | 7   | SLC25A42 |
| chr9:71866798-71875083    | 107 | ABHD17B  |
| chr2:231216637-231240041  | 4   | ARMC9    |
| chr1:1468383-1529331      | 193 | ATAD3C   |
| chr11:66521269-66523882   | 2   | BBS1     |
| chr22:41125863-41131633   | 6   | EP300    |
| chr11:65503120-65504595   | 3   | nogene   |
| chr14:101901718-101906529 | 45  | PPP2R5C  |
| chr6:7176654-7182082      | 58  | RREB1    |
| chr18:63978298-63985245   | 0   | SERPINB8 |
| chr4:94276338-94283303    | 14  | SMARCAD1 |
| chr1:245915529-245929937  | 58  | SMYD3    |
| chr12:77940318-77941133   | 84  | NAV3     |
| chr3:15707923-15797144    | 13  | ANKRD28  |
| chr1:94203929-94205683    | 15  | ARHGAP29 |
| chr6:85636966-85637356    | 19  | SYNCRIP  |
| chr3:196065442-196077122  | 13  | TFRC     |
| chr2:65246523-65251099    | 4   | ACTR2    |
| chr4:40821870-40830577    | 1   | APBB2    |
| chr20:35477870-35478101   | 15  | CEP250   |
| chr1:147252622-147259918  | 260 | CHD1L    |
| chr1:117881822-117886653  | 18  | GDAP2    |
| chr20:43620856-43642624   | 15  | IFT52    |
| chr3:49121432-49121860    | 0   | LAMB2    |
| chr2:43946112-43948518    | 13  | LRPPRC   |
| chr10:21670448-21673919   | 1   | MLLT10   |

|                           |    |           |
|---------------------------|----|-----------|
| chr4:80287336-80376917    | 31 | nogene    |
| chr14:90285081-90285532   | 15 | nogene    |
| chr22:37856355-37857077   | 23 | nogene    |
| chr12:54165373-54172433   | 13 | nogene    |
| chr7:2442546-2443746      | 6  | nogene    |
| chr12:19269769-19287556   | 15 | PLEKHA5   |
| chr5:75547009-75552591    | 15 | POLK      |
| chr1:8655972-8656441      | 15 | RERE      |
| chr1:40227412-40231658    | 15 | RLF       |
| chr5:40728344-40747019    | 40 | TTC33     |
| chr1:229632268-229654388  | 15 | URB2      |
| chr4:75770438-75774796    | 0  | USO1      |
| chr12:122232325-122232968 | 3  | VPS33A    |
| chr2:43712224-43738520    | 1  | PLEKHH2   |
| chr7:4768392-4770257      | 20 | nogene    |
| chr9:92258853-92265553    | 14 | IARS      |
| chr19:10446217-10450941   | 36 | PDE4A     |
| chr2:9318523-9335179      | 64 | ASAP2     |
| chr1:233353806-233355011  | 15 | KIAA1804  |
| chr9:22466115-22467906    | 0  | nogene    |
| chr19:8241428-8243083     | 15 | nogene    |
| chr22:40953554-40967884   | 19 | RBX1      |
| chr1:64009304-64050716    | 56 | ROR1      |
| chr11:93162705-93170221   | 21 | SLC36A4   |
| chr21:31152635-31154426   | 15 | TIAM1     |
| chr15:29761138-29773357   | 49 | TJP1      |
| chr18:6080880-6171942     | 0  | L3MBTL4   |
| chr17:59737452-59738947   | 0  | VMP1      |
| chr20:63775677-63805464   | 13 | ZBTB46    |
| chr20:34031521-34033239   | 20 | RALY      |
| chr22:38751392-38752506   | 1  | SUN2      |
| chr13:21413651-21425678   | 31 | ZDHHC20   |
| chr21:34859473-34887096   | 7  | RUNX1     |
| chr1:240355815-240438210  | 17 | FMN2      |
| chr5:37213558-37224592    | 0  | C5orf42   |
| chr20:33573973-33611335   | 0  | CBFA2T2   |
| chr18:46118180-46123364   | 5  | HAUS1     |
| chr13:29453067-29485306   | 13 | MTUS2-AS1 |
| chr19:52864032-52879590   | 13 | nogene    |
| chr17:15658801-15683157   | 3  | nogene    |
| chr1:5947103-5986232      | 13 | NPHP4     |
| chr18:62830034-62838909   | 40 | PHLPP1    |
| chr20:35721739-35739017   | 0  | RBM39     |

|                           |     |          |
|---------------------------|-----|----------|
| chr3:195326884-195345317  | 144 | ACAP2    |
| chr2:203245845-203266681  | 2   | CYP20A1  |
| chr9:123757702-123923415  | 13  | DENND1A  |
| chr1:172851214-172933643  | 0   | nogene   |
| chr5:41762110-41794749    | 0   | OXCT1    |
| chr2:232703423-232761436  | 56  | GIGYF2   |
| chr15:56827523-56917694   | 3   | nogene   |
| chr15:84680712-84687774   | 62  | SEC11A   |
| chr18:42020637-42049605   | 0   | PIK3C3   |
| chr18:31638643-31645479   | 0   | B4GALT6  |
| chr14:69091673-69122360   | 1   | DCAF5    |
| chr2:36441257-36464655    | 91  | CRIM1    |
| chr3:134188836-134195182  | 135 | RYK      |
| chr4:1694773-1696351      | 4   | SLBP     |
| chr1:243221723-243225321  | 278 | CEP170   |
| chr1:20757165-20767664    | 3   | HP1BP3   |
| chr10:87767672-87776427   | 278 | ATAD1    |
| chr1:156324971-156334918  | 50  | CCT3     |
| chr4:110059602-110198367  | 0   | ELOVL6   |
| chr22:32479132-32487828   | 34  | FBXO7    |
| chr8:17989858-18014840    | 14  | PCM1     |
| chr17:1364858-1369741     | 65  | YWHAE    |
| chr16:66727687-66729099   | 25  | DYNC1LI2 |
| chr1:233161270-233208689  | 0   | PCNXL2   |
| chr9:105364554-105366429  | 0   | SLC44A1  |
| chr19:34490375-34495771   | 62  | WTIP     |
| chr12:7423845-7433694     | 0   | CD163L1  |
| chr14:72714422-72723728   | 0   | DPF3     |
| chr20:31862570-31869597   | 0   | DUSP15   |
| chr11:29119510-29211765   | 0   | nogene   |
| chr3:125576188-125582978  | 13  | OSBPL1   |
| chr1:92833544-92834913    | 0   | RPL5     |
| chr15:74852068-74854649   | 0   | SCAMP2   |
| chr3:53229279-53230621    | 0   | TKT      |
| chr5:109037421-109100519  | 87  | FER      |
| chr5:179797664-179801969  | 5   | MGAT4B   |
| chr1:10095460-10105744    | 130 | UBE4B    |
| chr8:134583831-134610655  | 5   | ZFAT     |
| chr13:19993062-20006586   | 28  | ZMYM2    |
| chr4:145514437-145515013  | 45  | SMAD1    |
| chr8:25296512-25300657    | 1   | DOCK5    |
| chr11:107806716-107815965 | 52  | SLC35F2  |
| chr3:33392562-33425741    | 21  | UBP1     |

|                           |     |            |
|---------------------------|-----|------------|
| chr7:6751866-6752780      | 153 | nogene     |
| chr11:58609829-58616815   | 13  | ZFP91-CNTF |
| chr7:42148225-42148468    | 390 | GLI3       |
| chr12:31423596-31426424   | 10  | DENND5B    |
| chr9:20819795-20823115    | 479 | FOCAD      |
| chr3:70987993-71053773    | 13  | FOXP1      |
| chr13:44959380-44982154   | 13  | NUFIP1     |
| chr1:201712816-201718755  | 0   | NAV1       |
| chr15:50439008-50441493   | 1   | USP8       |
| chr8:39013964-39025884    | 0   | ADAM9      |
| chr12:350620-352324       | 45  | KDM5A      |
| chr17:31200421-31214585   | 15  | NF1        |
| chr1:115659640-115664268  | 89  | VANGL1     |
| chr1:23055068-23069151    | 55  | KDM1A      |
| chr11:65894013-65897006   | 815 | FOSL1      |
| chrX:103491213-103497613  | 4   | nogene     |
| chr5:14405847-14406672    | 33  | TRIO       |
| chr5:134741062-134741523  | 59  | CAMLG      |
| chr3:136433555-136477412  | 6   | STAG1      |
| chr17:59764970-59817773   | 31  | VMP1       |
| chr10:124021255-124046724 | 19  | CHST15     |
| chr20:32366383-32371874   | 265 | ASXL1      |
| chr11:119675158-119678765 | 14  | PVRL1      |
| chr1:243637610-243843282  | 13  | AKT3       |
| chr5:78141142-78216237    | 13  | AP3B1      |
| chr5:69258042-69262304    | 80  | CDK7       |
| chr1:47372954-47375293    | 0   | CMPK1      |
| chr5:112985834-113001674  | 158 | DCP2       |
| chr7:13931501-13977480    | 13  | ETV1       |
| chr10:102360183-102360395 | 33  | GBF1       |
| chr2:37000585-37020836    | 0   | HEATR5B    |
| chr18:6093354-6312056     | 0   | L3MBTL4    |
| chr6:83768480-83768971    | 0   | nogene     |
| chr4:189855885-189895643  | 13  | nogene     |
| chr5:168510580-168516950  | 15  | RARS       |
| chr6:89379223-89387590    | 7   | RRAGD      |
| chr2:113717752-113735858  | 0   | SLC35F5    |
| chr8:98749275-98774819    | 58  | STK3       |
| chr4:165085585-165100892  | 21  | TMEM192    |
| chr4:1900625-1951203      | 13  | WHSC1      |
| chr11:102186017-102209564 | 43  | YAP1       |
| chr2:70181162-70181997    | 0   | C2orf42    |
| chr16:70312608-70316104   | 0   | DDX19B     |

|                           |     |           |
|---------------------------|-----|-----------|
| chr17:8569719-8577338     | 21  | MYH10     |
| chr7:103103050-103128792  | 0   | NAPEPLD   |
| chr6:17665238-17675770    | 27  | NUP153    |
| chr3:101803644-101807126  | 0   | NXPE3     |
| chr15:43763076-43769646   | 8   | PDIA3     |
| chr7:90747680-90955817    | 0   | CDK14     |
| chr1:217610320-217614202  | 52  | GPATCH2   |
| chr19:57619411-57621493   | 10  | ZNF134    |
| chr12:110381751-110382960 | 11  | ANAPC7    |
| chr1:150492410-150496908  | 103 | TARS2     |
| chr16:1625972-1632365     | 151 | CRAMP1L   |
| chr17:82252433-82265796   | 40  | CSNK1D    |
| chr3:128637798-128638105  | 5   | RPN1      |
| chr4:38035587-38049898    | 39  | TBC1D1    |
| chr9:86305191-86310017    | 238 | ZCCHC6    |
| chr19:47681975-47695474   | 60  | GLTSCR1   |
| chrX:102816991-102839972  | 26  | LINC00630 |
| chr7:4877604-4878203      | 16  | RADIL     |
| chr12:130798524-130808704 | 0   | STX2      |
| chr4:77048448-77058635    | 0   | CCNI      |
| chr10:125038996-125074843 | 15  | CTBP2     |
| chr20:6355479-6356702     | 20  | nogene    |
| chr1:10417997-10418484    | 25  | nogene    |
| chr5:179580946-179589647  | 46  | RUFY1     |
| chr3:195979743-195982310  | 13  | SDHAP1    |
| chr3:47675474-47678311    | 65  | SMARCC1   |
| chr3:49335019-49335596    | 69  | USP4      |
| chr8:134600435-134608879  | 0   | ZFAT      |
| chr9:5924657-5954095      | 4   | KIAA2026  |
| chr11:62638982-62639731   | 429 | GANAB     |
| chr7:6139091-6146248      | 41  | USP42     |
| chr9:71862550-71875083    | 107 | ABHD17B   |
| chr7:40062825-40088331    | 21  | CDK13     |
| chr10:35016191-35031619   | 18  | CUL2      |
| chr12:53016472-53022627   | 459 | EIF4B     |
| chr4:140527465-140543586  | 0   | ELMOD2    |
| chr5:154026398-154034967  | 74  | FAM114A2  |
| chr11:28058925-28062516   | 0   | KIF18A    |
| chr1:117460488-117522937  | 27  | MAN1A2    |
| chr3:47977864-47998879    | 36  | MAP4      |
| chr12:109872855-109873141 | 1   | nogene    |
| chr17:38319328-38319816   | 16  | nogene    |
| chr6:143772257-143774215  | 28  | PHACTR2   |

|                           |     |          |
|---------------------------|-----|----------|
| chr9:112250928-112297916  | 275 | PTBP3    |
| chr1:19193432-19197265    | 47  | UBR4     |
| chr15:32523028-32524600   | 13  | WHAMMP1  |
| chr22:38493709-38501280   | 3   | DDX17    |
| chr2:178535731-178542361  | 415 | TTN-AS1  |
| chr5:10618332-10619378    | 25  | ANKRD33B |
| chr2:110666262-110669553  | 49  | BUB1     |
| chr13:23332487-23332913   | 0   | nogene   |
| chr8:140846259-140879637  | 499 | PTK2     |
| chr5:134160986-134174022  | 0   | SKP1     |
| chr3:142777631-142785040  | 61  | TRPC1    |
| chr6:20781144-20874430    | 15  | CDKAL1   |
| chr16:47463898-47547548   | 5   | PHKB     |
| chr19:7560647-7563773     | 1   | PNPLA6   |
| chr11:87067693-87091395   | 67  | TMEM135  |
| chr20:21339043-21344208   | 109 | XRN2     |
| chr16:16124788-16126167   | 14  | ABCC1    |
| chr5:65260599-65334085    | 7   | ADAMTS6  |
| chr6:135431207-135457713  | 14  | AHI1     |
| chr1:156976982-156979286  | 14  | ARHGEF11 |
| chr17:46352819-46358414   | 14  | ARL17B   |
| chr3:9800184-9804013      | 0   | ARPC4    |
| chr3:11315343-11348035    | 0   | ATG7     |
| chr5:37179360-37181005    | 16  | C5orf42  |
| chrX:18650409-18650592    | 14  | CDKL5    |
| chr1:160325542-160335322  | 3   | COPA     |
| chr20:35632310-35632923   | 14  | CPNE1    |
| chr19:49707517-49708839   | 14  | CPT1C    |
| chr2:232329812-232330776  | 14  | DIS3L2   |
| chr10:127008731-127018835 | 12  | DOCK1    |
| chr2:25628170-25639094    | 35  | DTNB     |
| chr2:62979187-62996766    | 87  | EHBP1    |
| chr3:186784961-186787882  | 14  | EIF4A2   |
| chr14:88714938-88754671   | 14  | EML5     |
| chr9:95978060-95979866    | 95  | ERCC6L2  |
| chr4:105726578-105825800  | 14  | GSTCD    |
| chr4:142402937-142405324  | 1   | INPP4B   |
| chr16:31361835-31362753   | 1   | ITGAX    |
| chr6:36470051-36475062    | 7   | KCTD20   |
| chr9:6880011-6893232      | 308 | KDM4C    |
| chr17:28618790-28621085   | 14  | KIAA0100 |
| chr3:122442037-122467429  | 0   | KPNA1    |
| chr18:21849195-21858646   | 14  | MIB1     |



|                           |     |         |
|---------------------------|-----|---------|
| chr13:41328723-41336756   | 14  | NAA16   |
| chr1:201817087-201817285  | 15  | NAV1    |
| chr2:24564294-24584560    | 49  | NCOA1   |
| chr12:124362125-124374463 | 14  | NCOR2   |
| chr2:77831032-77986697    | 14  | nogene  |
| chr6:129535931-129558166  | 1   | nogene  |
| chr13:98551633-98551973   | 14  | nogene  |
| chr2:27798868-27799329    | 14  | nogene  |
| chr5:113260799-113263865  | 14  | nogene  |
| chr1:201527883-201528402  | 0   | nogene  |
| chr18:32424784-32465975   | 14  | nogene  |
| chr19:43909227-43910495   | 14  | nogene  |
| chr6:85663673-85666147    | 14  | nogene  |
| chr19:57708699-57709315   | 14  | nogene  |
| chr6:17661652-17669028    | 25  | NUP153  |
| chrX:68111853-68119332    | 11  | OPHN1   |
| chr8:65747651-65782843    | 18  | PDE7A   |
| chr2:86070017-86102508    | 14  | POLR1A  |
| chr2:112551774-112559574  | 14  | POLR1B  |
| chr2:48474682-48491170    | 70  | PPP1R21 |
| chr14:35096557-35099384   | 3   | PPP2R3C |
| chr6:57379900-57537625    | 96  | PRIM2   |
| chr9:131430093-131447206  | 0   | PRRC2B  |
| chr1:96777584-96785254    | 14  | PTBP2   |
| chr12:120222862-120223833 | 14  | PXN     |
| chr5:233476-236599        | 14  | SDHA    |
| chr2:113731583-113735858  | 1   | SLC35F5 |
| chr17:64561499-64591149   | 14  | SMURF2  |
| chr9:112817704-112838697  | 14  | SNX30   |
| chr9:128566737-128568897  | 14  | SPTAN1  |
| chr9:100320264-100340369  | 14  | TEX10   |
| chr2:112494142-112503181  | 24  | TTL     |
| chr15:90250619-90253367   | 14  | TTLL13P |
| chr3:41819422-41883952    | 14  | ULK4    |
| chr2:61190517-61203263    | 14  | USP34   |
| chr10:1103598-1105267     | 158 | WDR37   |
| chr1:180836521-180863874  | 14  | XPR1    |
| chr1:35381258-35389082    | 109 | ZMYM4   |
| chr18:76849525-76881512   | 173 | ZNF236  |
| chr17:49311311-49312845   | 165 | ZNF652  |
| chr19:36761642-36772829   | 14  | ZNF850  |
| chr13:23353784-23368487   | 45  | SACS    |
| chr19:48959867-48960303   | 30  | nogene  |

|                           |     |          |
|---------------------------|-----|----------|
| chr2:108788851-108816105  | 13  | CCDC138  |
| chr14:80743074-80761613   | 73  | CEP128   |
| chr7:92126252-92127631    | 43  | CYP51A1  |
| chr9:19060087-19096769    | 13  | HAUS6    |
| chr8:30101897-30104486    | 172 | LEPROTL1 |
| chr15:41727179-41729349   | 16  | MGA      |
| chr2:218735460-218736101  | 13  | nogene   |
| chr2:77939830-77951533    | 25  | nogene   |
| chr19:29657660-29664207   | 0   | nogene   |
| chr6:17675228-17675770    | 13  | NUP153   |
| chr3:141540532-141559995  | 0   | RASA2    |
| chr3:67528131-67529186    | 2   | SUCLG2   |
| chr19:45831383-45831588   | 39  | SYMPK    |
| chr6:33267681-33269557    | 3   | VPS52    |
| chr1:42278347-42311110    | 9   | FOXJ3    |
| chr5:154011240-154034967  | 50  | FAM114A2 |
| chr7:6139091-6144196      | 58  | USP42    |
| chr6:75695098-75695523    | 19  | nogene   |
| chr2:84431507-84449752    | 41  | SUCLG1   |
| chr20:31743121-31744257   | 17  | nogene   |
| chr13:24459043-24460136   | 20  | PARP4    |
| chr11:9403289-9414411     | 13  | IPO7     |
| chr2:69542522-69556978    | 0   | AAK1     |
| chr1:94177611-94184288    | 8   | ARHGAP29 |
| chr1:11080763-11081238    | 0   | EXOSC10  |
| chr15:32888171-32902040   | 7   | FMN1     |
| chr2:227328677-227340380  | 3   | MFF      |
| chr8:140743229-140746860  | 2   | PTK2     |
| chr1:178283563-178390206  | 14  | RASAL2   |
| chr12:50192451-50206068   | 0   | LIMA1    |
| chr22:42797467-42826999   | 0   | ARFGAP3  |
| chr3:37281957-37282272    | 0   | GOLGA4   |
| chr19:41272081-41274055   | 0   | HNRNPUL1 |
| chr9:110941420-111036201  | 53  | LPAR1    |
| chr17:39419716-39423821   | 0   | MED1     |
| chrX:68096869-68299096    | 2   | OPHN1    |
| chr15:55223888-55389433   | 10  | RAB27A   |
| chr12:128814774-128815070 | 285 | SLC15A4  |
| chr15:51893814-51902036   | 0   | TMOD3    |
| chr17:4064360-4064829     | 83  | ZZEF1    |
| chrX:70402565-70404034    | 3   | KIF4A    |
| chr19:55140882-55141302   | 4   | TNNT1    |
| chr16:1453833-1456206     | 0   | CLCN7    |

|                           |     |           |
|---------------------------|-----|-----------|
| chr19:8371055-8371522     | 37  | ANGPTL4   |
| chr17:59644275-59651316   | 2   | CLTC      |
| chr19:46891726-46891999   | 28  | nogene    |
| chr14:96527429-96532649   | 23  | PAPOLA    |
| chr4:184659339-184672460  | 1   | PRIMPOL   |
| chr20:35035122-35057571   | 13  | TRPC4AP   |
| chr10:45639815-45663842   | 33  | ZFAND4    |
| chr8:60794985-60808272    | 23  | CHD7      |
| chr11:68505144-68519651   | 89  | PPP6R3    |
| chr17:80263662-80273404   | 1   | RNF213    |
| chr3:126022785-126026479  | 1   | SLC41A3   |
| chr3:47037665-47057490    | 9   | SETD2     |
| chr16:48347506-48348290   | 310 | LONP2     |
| chr17:31248983-31265339   | 48  | NF1       |
| chr8:47785112-47794501    | 28  | PRKDC     |
| chr7:67049948-67067403    | 13  | TYW1      |
| chr15:90439331-90440615   | 0   | IQGAP1    |
| chr6:145671238-145721155  | 0   | nogene    |
| chr12:28255580-28391411   | 56  | CCDC91    |
| chr9:76067954-76096102    | 6   | PCSK5     |
| chr2:208315192-208320359  | 9   | PIKFYVE   |
| chrX:102829887-102865152  | 13  | LINC00630 |
| chr19:29971192-29986417   | 842 | URI1      |
| chr9:128716746-128718625  | 5   | PKN3      |
| chr16:89531903-89532636   | 33  | SPG7      |
| chr17:61847100-61859907   | 23  | BRIP1     |
| chr11:95799231-95818904   | 13  | CEP57     |
| chr5:250991-251468        | 128 | SDHA      |
| chr2:9849372-9868429      | 13  | TAF1B     |
| chr8:33372106-33389798    | 14  | FUT10     |
| chrX:148383074-148383725  | 0   | nogene    |
| chr5:36225541-36227565    | 6   | NADK2     |
| chr10:101521638-101526199 | 4   | BTRC      |
| chr4:80295558-80335879    | 3   | C4orf22   |
| chr2:203245845-203280113  | 1   | CYP20A1   |
| chr9:137752330-137818138  | 0   | EHMT1     |
| chr10:119107947-119117667 | 6   | FAM45A    |
| chr16:2756333-2756606     | 21  | SRRM2     |
| chr2:121757239-121758806  | 21  | TSN       |
| chr17:43097243-43104956   | 0   | BRCA1     |
| chr9:135862466-135883078  | 24  | CAMSAP1   |
| chr7:94544410-94554575    | 1   | CASD1     |
| chr6:98875414-98934879    | 0   | FBXL4     |

|                           |     |             |
|---------------------------|-----|-------------|
| chr20:56378437-56379098   | 25  | nogene      |
| chr21:14968296-15043574   | 19  | NRIP1       |
| chr1:227747691-227748233  | 55  | SNAP47      |
| chr17:58703195-58709990   | 4   | RAD51C      |
| chr12:66145840-66161172   | 43  | TMBIM4      |
| chr4:139393590-139404490  | 56  | nogene      |
| chr2:3559447-3559729      | 29  | RNASEH1-AS1 |
| chr13:30630834-30631474   | 33  | USPL1       |
| chr5:37173754-37175986    | 0   | C5orf42     |
| chr1:240177920-240188262  | 197 | FMN2        |
| chr1:117870446-117920424  | 0   | GDAP2       |
| chr12:121452392-121453344 | 18  | KDM2B       |
| chr9:136013198-136016429  | 61  | NACC2       |
| chr2:182967215-182981376  | 0   | NCKAP1      |
| chr5:170892386-170968377  | 0   | RANBP17     |
| chr11:62827154-62827631   | 5   | STX5        |
| chr2:10419733-10420135    | 251 | HPCAL1      |
| chr4:185247293-185264610  | 42  | SNX25       |
| chr1:1482137-1486668      | 35  | ATAD3B      |
| chr16:57123413-57134826   | 45  | CPNE2       |
| chr5:50399231-50411383    | 26  | EMB         |
| chr3:149846010-149872154  | 156 | RNF13       |
| chr20:44511288-44514040   | 48  | SERINC3     |
| chr2:69816100-69819338    | 4   | ANXA4       |
| chr11:78568631-78571444   | 20  | NARS2       |
| chr16:11999296-12027444   | 45  | SNX29       |
| chr10:32471063-32518505   | 1   | CCDC7       |
| chr8:67149782-67164508    | 15  | CSPP1       |
| chr12:53016472-53019006   | 94  | EIF4B       |
| chr8:67161810-67164508    | 21  | CSPP1       |
| chrX:72462003-72464731    | 170 | HDAC8       |
| chr19:53438210-53475572   | 21  | nogene      |
| chr4:75515432-75516979    | 16  | THAP6       |
| chr6:49244965-49250609    | 2   | nogene      |
| chr22:38067703-38070891   | 1   | PICK1       |
| chr16:28641339-28752592   | 3   | NPIP9       |
| chr3:105740493-105776542  | 14  | CBLB        |
| chr4:121804621-121810099  | 32  | EXOSC9      |
| chr1:240257944-240334229  | 47  | FMN2        |
| chr2:69861277-69871832    | 0   | GMCL1       |
| chr1:247999599-248000062  | 1   | nogene      |
| chr4:87438276-87451735    | 0   | NUDT9       |
| chr19:2762505-2769091     | 63  | SGTA        |

|                           |     |          |
|---------------------------|-----|----------|
| chr2:40139400-40177855    | 56  | SLC8A1   |
| chr2:170055459-170061443  | 59  | UBR3     |
| chr19:4929221-4932956     | 0   | UHRF1    |
| chr2:182967215-182983382  | 4   | NCKAP1   |
| chr1:155783985-155795151  | 27  | GON4L    |
| chr15:100132006-100134621 | 39  | ADAMTS17 |
| chr10:102023476-102029745 | 32  | C10orf76 |
| chr20:37040152-37055656   | 61  | RBL1     |
| chr5:128985132-128990464  | 15  | SLC27A6  |
| chr10:88893870-88905660   | 28  | STAMBPL1 |
| chr5:126559239-126568356  | 0   | ALDH7A1  |
| chr2:175111567-175151158  | 0   | ATF2     |
| chr16:58586544-58599511   | 3   | CNOT1    |
| chr5:34793272-34796027    | 25  | RAI14    |
| chr8:70594505-70600082    | 1   | TRAM1    |
| chr7:100023418-100030375  | 0   | ZKSCAN1  |
| chr2:27598069-27608039    | 0   | ZNF512   |
| chr7:6731172-6731562      | 13  | nogene   |
| chr1:114749820-114750207  | 0   | CSDE1    |
| chr19:39879554-39894495   | 0   | FCGBP    |
| chr7:50669721-50703908    | 45  | GRB10    |
| chr17:5365121-5368468     | 25  | RABEP1   |
| chr9:33948373-33956146    | 166 | UBAP2    |
| chr14:52872798-52893427   | 3   | FERMT2   |
| chr7:24830767-24849176    | 0   | OSBPL3   |
| chr2:173358711-173366432  | 14  | CDCA7    |
| chr1:155378280-155415923  | 21  | ASH1L    |
| chr1:8876953-8877810      | 3   | nogene   |
| chr4:169002070-169007756  | 11  | CBR4     |
| chr19:14100825-14107409   | 1   | PRKACA   |
| chr5:135369405-135370142  | 86  | H2AFY    |
| chr10:13172375-13172765   | 152 | MCM10    |
| chr17:38361710-38366417   | 5   | SOCS7    |
| chr1:153762727-153765063  | 18  | INTS3    |
| chr5:146271482-146271674  | 17  | RBM27    |
| chr20:48953555-48963898   | 190 | ARFGEF2  |
| chr11:74084880-74098255   | 0   | C2CD3    |
| chr5:37108292-37125409    | 4   | C5orf42  |
| chr3:132483374-132484672  | 4   | DNAJC13  |
| chr8:129846803-129871496  | 26  | FAM49B   |
| chr7:128677563-128683255  | 3   | FAM71F2  |
| chr7:4754458-4761288      | 13  | FOXK1    |
| chr6:2115770-2124731      | 52  | GMDS     |

|                           |     |           |
|---------------------------|-----|-----------|
| chr1:23333517-23341017    | 20  | HNRNPR    |
| chr5:55960401-55968396    | 13  | IL6ST     |
| chr1:153668452-153669878  | 33  | ILF2      |
| chr15:41095600-41096353   | 47  | INO80     |
| chr6:108355653-108402054  | 1   | LACE1     |
| chr1:219193081-219218712  | 121 | LYPLAL1   |
| chr2:39315309-39326277    | 1   | MAP4K3    |
| chr1:169287302-169310080  | 5   | NME7      |
| chr1:72749165-72898883    | 15  | nogene    |
| chr12:71657525-71660427   | 54  | nogene    |
| chr7:156676385-156679306  | 0   | nogene    |
| chr7:69037742-69040699    | 1   | nogene    |
| chr4:139391882-139393722  | 13  | nogene    |
| chr6:141829735-141910011  | 32  | nogene    |
| chr6:141831499-141910011  | 6   | nogene    |
| chr5:93544794-93563463    | 13  | NR2F1-AS1 |
| chr7:24861612-24872069    | 32  | OSBPL3    |
| chr19:33511027-33512776   | 39  | PEPD      |
| chr11:85974707-85983973   | 182 | PICALM    |
| chr3:138688874-138694907  | 78  | PIK3CB    |
| chr1:161323613-161356840  | 25  | SDHC      |
| chr15:43043214-43048491   | 6   | UBR1      |
| chr3:196391812-196393619  | 218 | UBXN7     |
| chr19:57778750-57780146   | 25  | ZNF586    |
| chr12:132945620-132948270 | 15  | ZNF605    |
| chr12:123645454-123652735 | 80  | GTF2H3    |
| chr6:36496710-36499990    | 37  | STK38     |
| chrX:24062415-24068108    | 1   | EIF2S3    |
| chrX:53595186-53607699    | 6   | HUWE1     |
| chr11:64151238-64152393   | 69  | MACROD1   |
| chr15:71967983-72010447   | 0   | MYO9A     |
| chr8:123077110-123120188  | 28  | TBC1D31   |
| chr2:135748266-135755691  | 12  | UBXN4     |
| chr12:2820085-2840995     | 0   | ITFG2     |
| chr12:110396786-110398007 | 19  | nogene    |
| chr5:168559031-168564065  | 39  | PANK3     |
| chr2:43742740-43745963    | 14  | PLEKHH2   |
| chr20:34072065-34078553   | 383 | RALY      |
| chr7:127704838-127721400  | 137 | SND1      |
| chr3:136398748-136502779  | 0   | STAG1     |
| chr6:42573733-42594304    | 33  | UBR2      |
| chr1:23030468-23053839    | 19  | KDM1A     |
| chr14:102701277-102714617 | 0   | RCOR1     |

|                          |     |          |
|--------------------------|-----|----------|
| chr3:191357087-191370036 | 18  | CCDC50   |
| chr19:34208928-34215661  | 11  | LSM14A   |
| chr18:68753292-68784285  | 9   | nogene   |
| chr13:23365165-23375269  | 51  | SACS     |
| chr2:161179613-161224746 | 6   | TANK     |
| chr22:22303223-22310401  | 0   | BMS1P20  |
| chr10:84463932-84477664  | 38  | CCSER2   |
| chr4:102689573-102726683 | 37  | MANBA    |
| chr9:14102421-14116346   | 0   | NFIB     |
| chr17:32173830-32194107  | 74  | RHOT1    |
| chr7:17839806-17873616   | 0   | SNX13    |
| chr3:126607650-126647296 | 0   | TXNRD3NB |
| chr5:112754872-112780903 | 0   | APC      |
| chr14:99257470-99257839  | 29  | BCL11B   |
| chr11:66816052-66828364  | 60  | C11orf80 |
| chr5:123532568-123557564 | 33  | CSNK1G3  |
| chr7:133475327-133480138 | 0   | EXOC4    |
| chr16:53873785-53934109  | 68  | FTO      |
| chr15:63706779-63716473  | 45  | HERC1    |
| chr3:183643479-183672484 | 14  | KLHL24   |
| chr1:233969171-233971323 | 13  | nogene   |
| chr17:82394330-82398319  | 16  | OGFOD3   |
| chr8:106679209-106684359 | 156 | OXR1     |
| chr6:78988208-78990985   | 18  | PHIP     |
| chr11:66668614-66669291  | 20  | RBM4B    |
| chr1:150960562-150962158 | 45  | SETDB1   |
| chr5:136147831-136163391 | 97  | SMAD5    |
| chr7:56072996-56074736   | 1   | SUMF2    |
| chr4:38971031-38993998   | 0   | TMEM156  |
| chr6:83018972-83038485   | 14  | UBE3D    |
| chr8:134637460-134657737 | 0   | ZFAT     |
| chr4:145823421-145892415 | 0   | ZNF827   |
| chr22:41808874-41813822  | 677 | CCDC134  |
| chr18:2666156-2674145    | 63  | SMCHD1   |
| chr1:70184784-70189273   | 6   | LRRC40   |
| chr1:113938315-113938590 | 0   | nogene   |
| chr1:147648245-147655248 | 0   | ACP6     |
| chr15:89835461-89837722  | 24  | AP3S2    |
| chr10:72196810-72203524  | 37  | ASCC1    |
| chr3:11360580-11364734   | 1   | ATG7     |
| chr2:28025225-28051648   | 3   | BRE      |
| chr1:227004993-227017050 | 61  | CDC42BPA |
| chr2:29160332-29167540   | 0   | CLIP4    |

|                           |      |          |
|---------------------------|------|----------|
| chr1:16486425-16486661    | 1    | CROCCP3  |
| chr16:67610823-67612121   | 275  | CTCF     |
| chr14:102040235-102042748 | 18   | DYNC1H1  |
| chr4:1654977-1668905      | 35   | FAM53A   |
| chr12:32581959-32596876   | 13   | FGD4     |
| chr14:21263310-21263582   | 0    | HNRNPC   |
| chrX:70146632-70150322    | 5    | IGBP1    |
| chr3:20125904-20140364    | 27   | KAT2B    |
| chr7:156724111-156826744  | 85   | LMBR1    |
| chrX:136231543-136240486  | 0    | MAP7D3   |
| chr5:10403406-10407202    | 13   | 6-Mar    |
| chr1:220579353-220581118  | 0    | MARK1    |
| chr10:101793912-101795480 | 13   | MGEA5    |
| chr11:63946724-63947003   | 0    | NAA40    |
| chr13:107523563-107635379 | 0    | nogene   |
| chr5:179538973-179540832  | 54   | nogene   |
| chr13:29511188-29511584   | 13   | nogene   |
| chr10:103422987-103427391 | 13   | PDCD11   |
| chr12:42374637-42398994   | 30   | PPHLN1   |
| chr1:202562777-202569197  | 13   | PPP1R12B |
| chr7:5048032-5057779      | 95   | RBAK     |
| chr3:150622384-150624899  | 25   | SELT     |
| chr7:80798091-80828745    | 1    | SEMA3C   |
| chr2:32174062-32184338    | 148  | SLC30A6  |
| chr7:128081359-128084847  | 13   | SND1     |
| chr7:17868406-17907340    | 40   | SNX13    |
| chr8:125008952-125009343  | 2    | SQLE     |
| chr6:121205074-121242339  | 13   | TBC1D32  |
| chr4:48228476-48228659    | 0    | TEC      |
| chr2:192179667-192184483  | 13   | TMEFF2   |
| chr16:46668929-46674660   | 0    | VPS35    |
| chr10:86458988-86473973   | 29   | WAPL     |
| chr18:56779430-56816144   | 4    | WDR7     |
| chr9:37126311-37126942    | 409  | ZCCHC7   |
| chr1:33294936-33295305    | 34   | ZNF362   |
| chr10:68468122-68470163   | 1081 | DNA2     |
| chr11:85974707-86003451   | 28   | PICALM   |
| chr11:85981128-85996929   | 25   | PICALM   |
| chr5:14286870-14316743    | 20   | TRIO     |
| chr1:225144396-225185425  | 3    | DNAH14   |
| chr2:85555483-85559075    | 24   | GGCX     |
| chr8:97815327-97819238    | 17   | LAPTM4B  |
| chr4:40106899-40118024    | 18   | N4BP2    |



|                           |    |             |
|---------------------------|----|-------------|
| chrX:129565771-129569399  | 4  | OCRL        |
| chr4:6999084-7004924      | 4  | TBC1D14     |
| chr20:30388452-30398045   | 13 | FRG1BP      |
| chr21:25975069-25976028   | 2  | APP         |
| chr9:2804321-2812362      | 5  | KIAA0020    |
| chr16:72284571-72308188   | 8  | LINC01572   |
| chr4:7786193-7800653      | 17 | AFAP1       |
| chr12:31689006-31702007   | 8  | AMN1        |
| chr15:60355918-60382441   | 36 | ANXA2       |
| chr11:108301647-108310315 | 0  | ATM         |
| chr17:61776400-61793729   | 36 | BRIP1       |
| chr9:15874531-15920422    | 2  | CCDC171     |
| chr7:5901656-5912954      | 30 | CCZ1        |
| chr3:33619602-33632371    | 25 | CLASP2      |
| chr2:36387971-36442735    | 59 | CRIM1       |
| chr8:67103036-67116122    | 34 | CSPP1       |
| chr5:50382570-50411383    | 45 | EMB         |
| chr1:1825396-1879902      | 14 | GNB1        |
| chr2:9961045-9986282      | 28 | GRHL1       |
| chr10:1005817-1007128     | 50 | GTPBP4      |
| chr4:142402937-142431385  | 7  | INPP4B      |
| chr2:200504747-200507091  | 0  | KCTD18      |
| chr7:107978046-107980811  | 0  | LAMB1       |
| chr7:130945719-130967517  | 1  | LINC-PINT   |
| chr16:74674959-74675764   | 14 | MLKL        |
| chr4:169463242-169508852  | 0  | NEK1        |
| chr6:29889112-29927834    | 2  | nogene      |
| chr6:53263028-53263213    | 0  | nogene      |
| chr7:99375714-99377209    | 20 | nogene      |
| chr16:58717142-58717949   | 20 | nogene      |
| chr16:47547432-47550205   | 0  | PHKB        |
| chrX:21971896-21972571    | 13 | SMS         |
| chr3:17508473-17518995    | 0  | TBC1D5      |
| chr1:231529254-231542611  | 11 | TSNAX-DISC1 |
| chrX:10090770-10098579    | 13 | WWC3        |
| chr11:102114143-102186131 | 2  | YAP1        |
| chr8:103430611-103441618  | 17 | DCAF13      |
| chr12:50462581-50474167   | 58 | LARP4       |
| chr10:37729820-37734572   | 34 | nogene      |
| chr11:67608395-67609635   | 4  | NDUFV1      |
| chr20:34072065-34073866   | 32 | RALY        |
| chr3:15735409-15751820    | 37 | ANKRD28     |
| chr16:74348866-74350738   | 12 | LOC283922   |

|                          |     |          |
|--------------------------|-----|----------|
| chr10:15275854-15284105  | 72  | FAM171A1 |
| chr21:33241885-33252830  | 19  | IFNAR2   |
| chr7:6015145-6018045     | 119 | AIMP2    |
| chr16:81022596-81026638  | 16  | CENPN    |
| chr12:31423596-31447769  | 6   | DENND5B  |
| chr7:2366316-2371849     | 27  | EIF3B    |
| chr2:54910953-54928751   | 0   | EML6     |
| chr12:56086530-56088868  | 4   | ERBB3    |
| chr15:76283756-76287945  | 9   | ETFA     |
| chr21:32453311-32495170  | 2   | EVA1C    |
| chr11:65882852-65885663  | 16  | FIBP     |
| chr6:159991183-160010785 | 47  | IGF2R    |
| chr1:20713453-20715639   | 2   | KIF17    |
| chr7:2149151-2222754     | 21  | MAD1L1   |
| chr19:13025020-13025552  | 195 | NFIX     |
| chr14:68115818-68116112  | 4   | nogene   |
| chr5:98884345-98885153   | 14  | nogene   |
| chr2:185800079-185952902 | 1   | nogene   |
| chr7:43780120-43780886   | 14  | nogene   |
| chr6:159594102-159595204 | 5   | nogene   |
| chrX:103428627-103450660 | 2   | nogene   |
| chr15:55314038-55348725  | 0   | nogene   |
| chr5:6739731-6746427     | 14  | PAPD7    |
| chr3:146088585-146121248 | 14  | PLOD2    |
| chr22:50372019-50394135  | 558 | PPP6R2   |
| chr8:140818276-140846678 | 98  | PTK2     |
| chr9:125207563-125220700 | 32  | RABEPK   |
| chr11:4107434-4126833    | 14  | RRM1     |
| chr10:67891401-67909442  | 14  | SIRT1    |
| chr1:246544520-246556721 | 15  | TFB2M    |
| chr15:23023946-23037152  | 2   | TUBGCP5  |
| chrX:118394054-118404444 | 68  | WDR44    |
| chr15:43827964-43835150  | 14  | WDR76    |
| chr7:130022318-130029029 | 14  | ZC3HC1   |
| chr6:85640220-85641451   | 19  | SYNCRIP  |
| chr17:62010549-62035608  | 1   | MED13    |
| chr16:3536121-3536994    | 2   | CLUAP1   |
| chr16:57172223-57173869  | 1   | FAM192A  |
| chr5:42688889-42700002   | 49  | GHR      |
| chr1:156743651-156745373 | 38  | HDGF     |
| chr18:50918109-50940386  | 11  | ME2      |
| chr2:196912881-196920150 | 85  | PGAP1    |
| chr5:134535857-134552209 | 32  | JADE2    |

|                           |      |          |
|---------------------------|------|----------|
| chr1:88770351-88771879    | 104  | PKN2     |
| chr16:4760491-4766076     | 13   | ZNF500   |
| chr1:169309969-169324500  | 25   | NME7     |
| chr2:55585050-55588956    | 2    | PPP4R3B  |
| chr17:44797562-44807469   | 10   | GJC1     |
| chr18:42043732-42049605   | 47   | PIK3C3   |
| chr19:6230569-6270759     | 1011 | MLLT1    |
| chr17:59028414-59041898   | 0    | TRIM37   |
| chr13:60008543-60010669   | 51   | DIAPH3   |
| chr19:10574416-10575029   | 54   | AP1M2    |
| chr15:59458549-59460206   | 31   | FAM81A   |
| chr13:29514352-29517790   | 13   | SLC7A1   |
| chr14:31156839-31172122   | 29   | HECTD1   |
| chr15:59030803-59031702   | 72   | RNF111   |
| chr1:21748137-21753119    | 31   | USP48    |
| chr7:66771882-66797506    | 24   | RABGEF1  |
| chr18:13012972-13019206   | 51   | CEP192   |
| chr10:32038162-32040457   | 13   | KIF5B    |
| chr12:119673963-119676670 | 3    | PRKAB1   |
| chr3:119503953-119517315  | 2    | TIMMDC1  |
| chr18:688573-706578       | 1    | ENOSF1   |
| chr6:154441291-154450258  | 54   | CNKS3    |
| chr8:130179263-130188183  | 39   | ASAP1    |
| chr13:49167243-49175541   | 23   | FNDC3A   |
| chr6:42822795-42830172    | 31   | GLTSCR1L |
| chr1:233227225-233236980  | 43   | PCNXL2   |
| chr5:122019259-122022407  | 175  | SRFBP1   |
| chr15:41668827-41699159   | 17   | MGA      |
| chr1:220157269-220159421  | 1    | RAB3GAP2 |
| chr6:43527633-43531575    | 31   | XPO5     |
| chr6:129634041-129642018  | 2    | ARHGAP18 |
| chr19:34327420-34328151   | 0    | KIAA0355 |
| chr3:119947267-120093593  | 10   | GSK3B    |
| chr12:69784719-69795344   | 19   | RAB3IP   |
| chr10:114970367-114974385 | 48   | TRUB1    |
| chr2:199943764-199948472  | 0    | TYW5     |
| chr8:99431536-99481802    | 9    | VPS13B   |
| chr5:65242103-65334085    | 7    | ADAMTS6  |
| chr20:35724569-35725155   | 294  | RBM39    |
| chr1:151088189-151118139  | 0    | GABPB2   |
| chr11:107275460-107311232 | 1    | nogene   |
| chr1:11989164-11997421    | 1    | MFN2     |
| chr19:24105939-24106643   | 20   | ZNF254   |

|                           |     |            |
|---------------------------|-----|------------|
| chr6:141900322-141927055  | 36  | nogene     |
| chr17:7321864-7322866     | 42  | NEURL4     |
| chr2:208285725-208288818  | 125 | PIKFYVE    |
| chr11:73707419-73716362   | 96  | RAB6A      |
| chr9:35228014-35259050    | 27  | UNC13B     |
| chr6:31669508-31669810    | 2   | CSNK2B     |
| chr22:29094257-29098953   | 17  | KREMEN1    |
| chr15:42827927-42872758   | 20  | TTBK2      |
| chr6:158448995-158452268  | 56  | TULP4      |
| chr19:6262227-6270759     | 136 | MLLT1      |
| chr6:43002451-43003099    | 23  | nogene     |
| chr14:23301880-23302159   | 7   | PPP1R3E    |
| chr1:150417595-150446401  | 33  | RPRD2      |
| chr6:31148404-31148728    | 65  | CCHCR1     |
| chr15:74671454-74671774   | 43  | EDC3       |
| chr1:10271501-10278128    | 0   | KIF1B      |
| chr14:75109684-75118935   | 17  | NEK9       |
| chr17:15487887-15488334   | 0   | nogene     |
| chr3:125560378-125582978  | 17  | OSBPL11    |
| chr8:31147052-31150455    | 2   | WRN        |
| chr10:13659322-13663509   | 6   | FRMD4A     |
| chr11:118509135-118512025 | 2   | KMT2A      |
| chr15:52405286-52410476   | 24  | MYO5A      |
| chr2:202284344-202287724  | 26  | NOP58      |
| chr9:127890636-127891043  | 3   | ST6GALNAC6 |
| chr10:13073867-13098602   | 0   | CCDC3      |
| chr10:100243697-100246935 | 14  | CWF19L1    |
| chr16:22225653-22230664   | 16  | EEF2K      |
| chr12:26954144-26957743   | 15  | FGFR10P2   |
| chr7:887369-893971        | 0   | GET4       |
| chr19:47356206-47357442   | 14  | nogene     |
| chr1:174637374-174752354  | 0   | RABGAP1L   |
| chr10:16752538-16782084   | 202 | RSU1       |
| chr19:45641766-45642197   | 1   | EML2-AS1   |
| chr2:169537226-169544835  | 0   | FASTKD1    |
| chr8:98212404-98222600    | 0   | NIPAL2     |
| chr15:32617749-32618655   | 16  | nogene     |
| chr5:134302589-134321903  | 16  | CDKL3      |
| chr12:110127359-110135437 | 16  | IFT81      |
| chr1:202001375-202001767  | 20  | RNPEP      |
| chr6:42644213-42648170    | 4   | UBR2       |
| chr1:174272413-174371072  | 24  | RABGAP1L   |
| chr7:23505745-23513082    | 28  | TRA2A      |

|                           |     |           |
|---------------------------|-----|-----------|
| chr10:11997671-12004727   | 49  | UPF2      |
| chr1:35945691-35973511    | 55  | AGO3      |
| chr21:14825522-14857708   | 3   | nogene    |
| chr9:136348696-136349763  | 34  | GPSM1     |
| chr22:46878652-46894846   | 57  | TBC1D22A  |
| chr8:140549113-140551436  | 6   | AGO2      |
| chr13:25326915-25338731   | 20  | NUPL1     |
| chr20:25323324-25339351   | 14  | ABHD12    |
| chr3:57242855-57267792    | 27  | APPL1     |
| chr14:34862043-34862322   | 480 | BAZ1A     |
| chrX:49242015-49243462    | 14  | CCDC22    |
| chr1:160323430-160332557  | 312 | COPA      |
| chr12:96018762-96019240   | 14  | LTA4H     |
| chr7:114942274-114979781  | 4   | MDFIC     |
| chr22:40355428-40355905   | 19  | nogene    |
| chr5:131504625-131548190  | 47  | RAPGEF6   |
| chr8:140300468-140360193  | 13  | TRAPPC9   |
| chr20:63752685-63790790   | 1   | ZBTB46    |
| chr5:43161248-43161931    | 200 | ZNF131    |
| chr2:29121373-29181697    | 90  | CLIP4     |
| chr22:31089698-31090180   | 27  | SMTN      |
| chr6:107039748-107040230  | 1   | C6orf203  |
| chr5:116317516-116318300  | 47  | nogene    |
| chr2:169603641-169614724  | 193 | PPIG      |
| chr3:9948066-9948469      | 13  | PRRT3-AS1 |
| chr10:63190893-63194375   | 3   | JMJD1C    |
| chr18:46890579-46903635   | 502 | PIAS2     |
| chr12:111509548-111510582 | 171 | ATXN2     |
| chr3:197115926-197142768  | 16  | DLG1      |
| chr12:125073875-125086443 | 4   | AACS      |
| chr16:89418283-89427069   | 75  | ANKRD11   |
| chr2:218217462-218239484  | 14  | ARPC2     |
| chr10:310030-341329       | 3   | DIP2C     |
| chr4:142082030-142124760  | 18  | INPP4B    |
| chr6:112900344-112937686  | 17  | nogene    |
| chr20:44916755-44919277   | 19  | PABPC1L   |
| chr3:49076708-49077038    | 11  | QRICH1    |
| chr5:65680493-65685472    | 28  | SGTB      |
| chr5:55652528-55664863    | 25  | SLC38A9   |
| chr14:77448493-77454102   | 3   | VIPAS39   |
| chr8:134564986-134590355  | 2   | ZFAT      |
| chr3:43574808-43580472    | 93  | ANO10     |
| chr8:37765525-37766355    | 297 | PROSC     |

|                           |     |            |
|---------------------------|-----|------------|
| chr2:109564365-109593119  | 291 | 10-Sep     |
| chr9:111574733-111586165  | 181 | PTGR1      |
| chr16:3129247-3129653     | 0   | ZNF213-AS1 |
| chr14:24235736-24237562   | 0   | GMPR2      |
| chr11:3705199-3706627     | 17  | NUP98      |
| chr12:46229152-46254936   | 528 | SLC38A1    |
| chr8:123226499-123239144  | 3   | C8orf76    |
| chr1:200760838-200815644  | 25  | CAMSAP2    |
| chr2:10784933-10790833    | 20  | PDIA6      |
| chr3:44455120-44458364    | 18  | ZNF445     |
| chr8:58623708-58635546    | 1   | NSMAF      |
| chr15:41069569-41079904   | 12  | INO80      |
| chr7:66681005-66681505    | 28  | nogene     |
| chr10:103345023-103348999 | 33  | PCGF6      |
| chr7:99396599-99408573    | 89  | nogene     |
| chr18:31638643-31666372   | 187 | B4GALT6    |
| chr17:67166477-67167796   | 14  | HELZ       |
| chrX:71294349-71297461    | 15  | NONO       |
| chr11:86007541-86026367   | 6   | PICALM     |
| chr2:135748266-135761911  | 113 | UBXN4      |
| chr14:75717860-75735289   | 5   | TTLL5      |
| chr1:36004340-36009594    | 1   | AGO3       |
| chr4:121833230-121835283  | 1   | BBS7       |
| chr5:148960916-148970284  | 0   | nogene     |
| chr1:246193674-246193963  | 0   | nogene     |
| chr5:37331684-37341242    | 61  | NUP155     |
| chr4:88051990-88068061    | 7   | PKD2       |
| chr7:5286655-5287985      | 2   | SLC29A4    |
| chr1:19755633-19787117    | 12  | TMCO4      |
| chr19:19592505-19599365   | 8   | PBX4       |
| chr9:91717306-91722580    | 15  | nogene     |
| chr20:20018495-20019023   | 18  | nogene     |
| chr1:240206798-240234450  | 15  | FMN2       |
| chr1:173402258-173442097  | 0   | nogene     |
| chr2:161318821-161371322  | 0   | PSMD14     |
| chr5:34813573-34821850    | 14  | RAI14      |
| chr9:122865348-122897576  | 1   | RC3H2      |
| chr10:119926035-119933787 | 0   | SEC23IP    |
| chr17:50998443-51021365   | 0   | SPAG9      |
| chr20:47262287-47276754   | 0   | ZMYND8     |
| chr7:152199278-152207428  | 17  | KMT2C      |
| chr20:62124616-62131506   | 26  | LSM14B     |
| chr4:1892165-1918623      | 31  | WHSC1      |

|                           |    |         |
|---------------------------|----|---------|
| chr3:37075023-37094908    | 0  | LRRFIP2 |
| chr3:193662821-193667280  | 0  | OPA1    |
| chr2:96194957-96195549    | 45 | STARD7  |
| chr3:141512162-141529802  | 7  | RASA2   |
| chr6:30723428-30723674    | 96 | TUBB    |
| chr8:67175295-67190759    | 2  | CSPP1   |
| chr19:6010135-6016271     | 12 | RFX2    |
| chr5:179585865-179586300  | 20 | RUFY1   |
| chr17:20204332-20232405   | 4  | SPECC1  |
| chr2:101002701-101006071  | 16 | RPL31   |
| chrX:110171419-110173453  | 29 | TMEM164 |
| chr17:82248874-82265796   | 75 | CSNK1D  |
| chr5:55272086-55281515    | 0  | DHX29   |
| chr20:38972558-38994880   | 0  | DHX35   |
| chr17:44804015-44807469   | 0  | GJC1    |
| chr9:3879426-3937189      | 0  | GLIS3   |
| chrX:16754944-16757309    | 0  | SYAP1   |
| chr5:80146089-80158962    | 0  | SERINC5 |
| chrX:91414903-91446693    | 4  | nogene  |
| chr12:119822819-119825368 | 21 | CIT     |
| chr1:45615012-45616393    | 32 | NASP    |
| chr1:155957712-155958396  | 1  | ARHGEF2 |
| chr1:8866278-8867250      | 64 | ENO1    |
| chr2:197493323-197495376  | 65 | HSPD1   |
| chr18:36195256-36203189   | 78 | MOCOS   |
| chr11:78489912-78493195   | 4  | NARS2   |
| chr7:108479183-108497577  | 1  | PNPLA8  |
| chr8:134501828-134521001  | 0  | ZFAT    |
| chr2:168138087-168182090  | 21 | STK39   |
| chr3:30644746-30650460    | 16 | TGFBR2  |
| chr16:3810602-3813121     | 4  | CREBBP  |
| chr15:63542054-63563008   | 25 | USP3    |
| chr1:1655368-1719455      | 14 | CDK11B  |
| chr10:100937401-100944128 | 50 | SLF2    |
| chr9:92268173-92285839    | 24 | IARS    |
| chr1:224294266-224303857  | 30 | NVL     |
| chr2:233434379-233437479  | 39 | DGKD    |
| chr19:11123173-11123344   | 0  | LDLR    |
| chr17:82956694-82965746   | 20 | B3GNTL1 |
| chr5:171183170-171205612  | 25 | RANBP17 |
| chr9:112142319-112143623  | 1  | SUSD1   |
| chr1:203833790-203840374  | 0  | ZC3H11A |
| chr4:150735257-150808398  | 40 | LRBA    |

|                           |      |            |
|---------------------------|------|------------|
| chr14:24080234-24084745   | 1    | nogene     |
| chr5:171391304-171400925  | 123  | NPM1       |
| chr4:182894488-182915575  | 3    | DCTD       |
| chr2:231214830-231216793  | 6    | ARMC9      |
| chr1:35474804-35479212    | 8    | KIAA0319L  |
| chr1:152226425-152227051  | 2    | nogene     |
| chr5:134692601-134697246  | 5    | SEC24A     |
| chr2:229858771-229880128  | 156  | TRIP12     |
| chr9:33941648-33953474    | 23   | UBAP2      |
| chr6:43546570-43548460    | 166  | XPO5       |
| chr20:37066723-37068186   | 82   | RBL1       |
| chr12:55789074-55803728   | 55   | SARNP      |
| chr21:39274373-39278813   | 17   | BRWD1      |
| chr13:23862301-23881787   | 31   | MIPEP      |
| chr22:46097925-46109908   | 15   | MIRLET7BHG |
| chr4:17822982-17831116    | 27   | NCAPG      |
| chr6:35855224-35855844    | 26   | nogene     |
| chr12:104288930-104339273 | 14   | TXNRD1     |
| chr16:28152658-28156527   | 47   | XPO6       |
| chr2:9350807-9358889      | 94   | ASAP2      |
| chr11:66821642-66828943   | 0    | C11orf80   |
| chr5:37138719-37164327    | 13   | C5orf42    |
| chr3:105734008-105776542  | 17   | CBLB       |
| chr2:108788851-108794721  | 37   | CCDC138    |
| chr1:224952669-224968874  | 137  | DNAH14     |
| chr8:25242194-25243757    | 50   | DOCK5      |
| chr8:11808793-11826215    | 6    | FDFT1      |
| chr4:53425871-53453133    | 41   | FIP1L1     |
| chr16:1557934-1602591     | 13   | IFT140     |
| chr3:160521778-160528039  | 7    | KPNA4      |
| chr5:1477403-1501603      | 13   | LPCAT1     |
| chr15:72045723-72046634   | 41   | MYO9A      |
| chr2:190670325-190687317  | 1    | NAB1       |
| chr12:6887922-6888158     | 13   | nogene     |
| chr4:103328124-103371506  | 1    | nogene     |
| chr19:4410318-4410475     | 13   | nogene     |
| chr11:47822086-47837623   | 0    | NUP160     |
| chr13:24499300-24503777   | 388  | PARP4      |
| chr9:26928099-26928408    | 13   | PLAA       |
| chr18:9577063-9588235     | 13   | PPP4R1     |
| chr8:140818276-140890769  | 1454 | PTK2       |
| chr11:66365300-66366564   | 2    | SLC29A2    |
| chr10:110600438-110601130 | 13   | SMC3       |



|                           |     |          |
|---------------------------|-----|----------|
| chr4:6994183-7001251      | 189 | TBC1D14  |
| chr12:44031636-44211387   | 13  | TMEM117  |
| chr20:33770083-33781387   | 13  | ZNF341   |
| chr11:63651935-63659252   | 1   | ATL3     |
| chr6:110887504-110893662  | 81  | AMD1     |
| chr4:147854675-147881932  | 113 | ARHGAP10 |
| chr10:115461940-115519324 | 18  | ATRNL1   |
| chr3:197756425-197768587  | 23  | FYTTD1   |
| chr10:17229419-17229871   | 1   | nogene   |
| chr7:66993216-66994341    | 6   | SBDS     |
| chr13:21157921-21172681   | 54  | SKA3     |
| chr1:23816674-23820593    | 12  | HMGCL    |
| chr20:34782120-34792563   | 42  | NCOA6    |
| chr12:101714089-101723847 | 17  | CHPT1    |
| chr7:158630496-158646563  | 17  | NCAPG2   |
| chr14:50466582-50482416   | 6   | MAP4K5   |
| chr15:35410834-35454820   | 17  | DPH6     |
| chr5:138319218-138329647  | 94  | CDC25C   |
| chr12:31402497-31409384   | 0   | DENND5B  |
| chr7:75553452-75554526    | 0   | HIP1     |
| chr16:47109482-47129364   | 119 | NETO2    |
| chr6:57379900-57382168    | 58  | PRIM2    |
| chr8:140275657-140300614  | 25  | TRAPPC9  |
| chr2:147896300-147899898  | 614 | ACVR2A   |
| chr12:1702885-1781076     | 0   | ADIPOR2  |
| chr15:89790459-89791093   | 0   | ANPEP    |
| chr3:63898398-63983021    | 0   | ATXN7    |
| chr10:35016191-35028887   | 3   | CUL2     |
| chr11:108688935-108693600 | 41  | DDX10    |
| chr17:63792411-63806654   | 15  | DDX42    |
| chr8:123786494-123789745  | 63  | FAM91A1  |
| chr2:241407536-241436538  | 28  | FARP2    |
| chr2:232832856-232839971  | 3   | GIGYF2   |
| chr15:41055246-41070547   | 0   | INO80    |
| chr12:51049033-51056502   | 62  | LETMD1   |
| chr3:152414940-152455577  | 0   | MBNL1    |
| chr9:36669309-36674937    | 53  | MELK     |
| chr8:143575422-143575702  | 0   | NAPRT    |
| chr20:36656359-36671397   | 0   | NDRG3    |
| chr4:173164977-173168113  | 0   | nogene   |
| chr10:102157018-102161925 | 0   | NOLC1    |
| chr4:87434980-87438372    | 0   | NUDT9    |
| chr10:34516978-34517159   | 0   | PARD3    |

|                           |     |           |
|---------------------------|-----|-----------|
| chr3:111913318-111913702  | 0   | PHLDB2    |
| chr4:154539950-154545923  | 0   | PLRG1     |
| chr14:73147794-73174376   | 0   | PSEN1     |
| chr3:50105076-50109688    | 0   | RBM5      |
| chr6:2954591-2959342      | 2   | SERPINB6  |
| chr12:53381658-53409561   | 4   | SP1       |
| chr8:47279861-47294030    | 449 | SPIDR     |
| chr6:45321795-45365301    | 23  | SUPT3H    |
| chr21:33455726-33467122   | 26  | TMEM50B   |
| chr5:151060317-151065131  | 34  | TNIP1     |
| chr14:102870184-102876525 | 106 | TRAF3     |
| chr6:30021666-30035983    | 49  | ZNRD1-AS1 |
| chr6:131145284-131219808  | 15  | AKAP7     |
| chr2:214752446-214769312  | 41  | BARD1     |
| chr16:14648387-14649973   | 0   | BFAR      |
| chr7:77292951-77294938    | 77  | CCDC146   |
| chrX:1282677-1288888      | 0   | CSF2RA    |
| chr18:61577027-61592623   | 0   | nogene    |
| chr2:18644169-18688328    | 0   | nogene    |
| chr11:19762228-19762631   | 33  | nogene    |
| chr5:177244194-177248324  | 30  | NSD1      |
| chr6:13639562-13641307    | 0   | RANBP9    |
| chr17:75957458-75960375   | 0   | ACOX1     |
| chr11:72707174-72714321   | 27  | ARAP1     |
| chr4:186663298-186709845  | 32  | FAT1      |
| chr17:46082440-46120049   | 20  | KANSL1    |
| chr9:593608-594073        | 0   | nogene    |
| chr16:89895037-89907322   | 20  | TCF25     |
| chr16:69669976-69677335   | 34  | NFAT5     |
| chr3:47498285-47504448    | 3   | ELP6      |
| chr21:43004325-43028874   | 116 | PKNOX1    |
| chr12:32598496-32625779   | 24  | FGD4      |
| chr7:78976487-79007206    | 0   | MAGI2     |
| chr11:130109428-130122513 | 98  | APLP2     |
| chr10:31861394-31861658   | 5   | ARHGAP12  |
| chrX:63697124-63724711    | 11  | ARHGEF9   |
| chr12:53531743-53534659   | 1   | ATF7      |
| chr1:62803718-62841547    | 19  | ATG4C     |
| chr6:109145218-109146937  | 144 | CEP57L1   |
| chr19:2185854-2194577     | 26  | DOT1L     |
| chr8:108214606-108241913  | 60  | EIF3E     |
| chr12:53027781-53028188   | 317 | EIF4B     |
| chr10:93676652-93687449   | 63  | FRA10AC1  |

|                           |     |           |
|---------------------------|-----|-----------|
| chr10:13663452-13670528   | 0   | FRMD4A    |
| chr10:102351374-102351816 | 20  | GBF1      |
| chr10:72715110-72742273   | 3   | MCU       |
| chr2:134253094-134254644  | 217 | MGAT5     |
| chr16:29833732-29836958   | 12  | MVP       |
| chr17:3804532-3805018     | 25  | nogene    |
| chr1:36284512-36284924    | 0   | nogene    |
| chr1:25988230-25990863    | 13  | PAFAH2    |
| chr14:58286639-58291707   | 27  | PSMA3-AS1 |
| chr7:66944975-66948694    | 5   | TMEM248   |
| chr8:132727797-132757294  | 3   | TMEM71    |
| chr20:35347163-35394196   | 1   | UQCC1     |
| chr2:71368381-71370005    | 2   | ZNF638    |
| chr2:17726388-17745951    | 13  | SMC6      |
| chr9:136522849-136523979  | 12  | NOTCH1    |
| chr6:138207041-138210041  | 53  | ARFGEF3   |
| chr18:42049530-42067513   | 1   | PIK3C3    |
| chr2:171022871-171046362  | 0   | TLK1      |
| chr10:68142939-68158627   | 125 | MYPN      |
| chr1:1022200-1022462      | 17  | AGRN      |
| chr7:73449541-73459718    | 0   | BAZ1B     |
| chr2:46356150-46361090    | 0   | EPAS1     |
| chr9:20907149-20933132    | 16  | FOCAD     |
| chr8:41611902-41615048    | 17  | GPAT4     |
| chr8:43178073-43182260    | 0   | HGSNAT    |
| chr6:149842982-149853160  | 2   | LRP11     |
| chr14:71105234-71105440   | 58  | PCNX      |
| chr9:131430089-131465078  | 1   | PRRC2B    |
| chr8:127855154-127890998  | 184 | PVT1      |
| chr5:141973582-141987975  | 2   | RNF14     |
| chr12:111933885-111943369 | 54  | TMEM116   |
| chr14:39158284-39159550   | 13  | TRAPPC6B  |
| chr15:43024828-43025429   | 24  | UBR1      |
| chr8:102327741-102345545  | 0   | UBR5      |
| chr16:74938149-74951543   | 16  | WDR59     |
| chr20:47276313-47290274   | 2   | ZMYND8    |
| chr9:111527267-111530963  | 15  | ZNF483    |
| chr1:235465635-235494828  | 249 | B3GALNT2  |
| chr10:126996747-126999435 | 49  | DOCK1     |
| chr8:100527844-100529860  | 2   | ANKRD46   |
| chr3:172285925-172310881  | 7   | FNDC3B    |
| chr2:239176412-239236664  | 18  | HDAC4     |
| chr13:24517746-24518043   | 26  | nogene    |

|                           |     |          |
|---------------------------|-----|----------|
| chr20:35721739-35742113   | 5   | RBM39    |
| chrX:108614910-108626349  | 0   | COL4A5   |
| chr21:25741572-25752234   | 19  | GABPA    |
| chr5:109767534-109774965  | 28  | MAN2A1   |
| chr2:39196951-39229588    | 4   | nogene   |
| chr2:43943686-43982434    | 21  | LRPPRC   |
| chr10:73030270-73047101   | 48  | P4HA1    |
| chr6:20546345-20548705    | 78  | CDKAL1   |
| chr7:128997388-129001234  | 59  | TNPO3    |
| chr7:66286510-66286709    | 189 | TPST1    |
| chr19:13868177-13868567   | 1   | nogene   |
| chr15:100132006-100199423 | 25  | ADAMTS17 |
| chr14:92126121-92143294   | 118 | CPSF2    |
| chr16:1390631-1403344     | 21  | UNKL     |
| chr10:1072115-1096246     | 45  | WDR37    |
| chr16:11779165-11782388   | 76  | ZC3H7A   |
| chr5:65424525-65473952    | 19  | ADAMTS6  |
| chrX:108575909-108578383  | 1   | COL4A5   |
| chr10:77493797-77495103   | 14  | nogene   |
| chr13:31260945-31286819   | 1   | B3GLCT   |
| chr14:55649775-55659703   | 1   | KTN1     |
| chr2:206126538-206130242  | 0   | NDUFS1   |
| chr5:94628810-94630743    | 53  | SLF1     |
| chr5:160010499-160036803  | 65  | TTC1     |
| chr10:7243557-7276989     | 23  | SFMBT2   |
| chr1:31059203-31059577    | 200 | PUM1     |
| chr17:8255026-8258199     | 15  | PFAS     |
| chr3:122437169-122496570  | 13  | KPNA1    |
| chr5:150400006-150400164  | 70  | nogene   |
| chr17:1842802-1872526     | 27  | RPA1     |
| chr20:17953995-17955475   | 1   | SNX5     |
| chr3:122449573-122454001  | 26  | KPNA1    |
| chr7:92225719-92226682    | 3   | KRIT1    |
| chr11:108135141-108148858 | 19  | ACAT1    |
| chr21:45128401-45144701   | 13  | ADARB1   |
| chr18:79126266-79193263   | 10  | ATP9B    |
| chrX:77654097-77664778    | 12  | ATRX     |
| chr15:92953356-92956649   | 35  | CHD2     |
| chr4:1225359-1228343      | 33  | CTBP1    |
| chr1:168002481-168004793  | 32  | DCAF6    |
| chr3:56666259-56673725    | 28  | FAM208A  |
| chrX:154712228-154716329  | 26  | GAB3     |
| chr22:37618447-37621696   | 8   | GGA1     |

|                           |     |          |
|---------------------------|-----|----------|
| chr7:23345939-23351586    | 35  | IGF2BP3  |
| chr8:55966714-55969793    | 107 | LYN      |
| chr7:24623665-24680520    | 121 | MPP6     |
| chr2:42640172-42659862    | 64  | MTA3     |
| chr2:206141940-206152510  | 0   | NDUFS1   |
| chr2:230295436-230394574  | 16  | nogene   |
| chrX:71536177-71538072    | 9   | OGT      |
| chr16:2581294-2586893     | 3   | PDPK1    |
| chr10:13291830-13295606   | 2   | PHYH     |
| chr4:88065373-88068061    | 0   | PKD2     |
| chr19:43655418-43656640   | 13  | PLAUR    |
| chr11:66624213-66625678   | 5   | RBM14    |
| chr2:127989563-127993308  | 7   | SAP130   |
| chr12:121743628-121752223 | 98  | TMEM120B |
| chr6:125993756-126013101  | 3   | TRMT11   |
| chr2:128097428-128109746  | 41  | UGGT1    |
| chr5:55467868-55475450    | 1   | PPAP2A   |
| chr2:119877322-119885882  | 67  | PTPN4    |
| chr8:119793365-119802025  | 68  | TAF2     |
| chr12:19493799-19500221   | 28  | AEBP2    |
| chr10:80280172-80284038   | 31  | MAT1A    |
| chr5:131415070-131417615  | 2   | nogene   |
| chr11:3735190-3753408     | 43  | NUP98    |
| chr16:68025414-68038149   | 43  | DUS2     |
| chr5:73864816-73873246    | 8   | ARHGEF28 |
| chr10:12209966-12217467   | 13  | CDC123   |
| chr15:64300318-64300723   | 13  | CSNK1G1  |
| chr10:21805979-21882439   | 2   | DNAJC1   |
| chr2:30459551-30479911    | 12  | LCLAT1   |
| chr2:151416560-151423042  | 13  | RIF1     |
| chr3:17372074-17384015    | 16  | TBC1D5   |
| chr5:160010499-160043169  | 29  | TTC1     |
| chr13:113190871-113200516 | 12  | PCID2    |
| chr2:61294268-61294528    | 25  | nogene   |
| chrX:96912327-96918617    | 28  | DIAPH2   |
| chr10:32038162-32048551   | 4   | KIF5B    |
| chr17:32171042-32183272   | 36  | RHOT1    |
| chr1:197652234-197715074  | 51  | DENND1B  |
| chr5:69355648-69355953    | 7   | AK6      |
| chr3:136255855-136262065  | 18  | PCCB     |
| chr2:203366876-203395780  | 3   | ABI2     |
| chr5:142885297-142932125  | 99  | ARHGAP26 |
| chr7:90374301-90378211    | 17  | GTPBP10  |

|                           |     |           |
|---------------------------|-----|-----------|
| chr13:77176496-77180318   | 13  | MYCBP2    |
| chr1:72341546-72380160    | 1   | nogene    |
| chr13:41907585-41912168   | 41  | VWA8      |
| chr11:62882907-62885608   | 93  | SLC3A2    |
| chr12:82369386-82389922   | 2   | METTL25   |
| chr12:100102765-100108548 | 19  | UHRF1BP1L |
| chr6:135394775-135428759  | 24  | AHI1      |
| chr22:29502378-29506777   | 4   | nogene    |
| chr20:49066191-49075520   | 12  | CSE1L     |
| chr11:61323978-61331691   | 0   | DDB1      |
| chr6:25482256-25500235    | 21  | LRRC16A   |
| chr16:69653235-69659899   | 23  | NFAT5     |
| chr10:26720217-26724127   | 19  | PDSS1     |
| chr14:69116365-69149503   | 19  | DCAF5     |
| chr8:42944401-42945326    | 24  | nogene    |
| chr18:26078887-26079612   | 18  | nogene    |
| chr11:86306244-86326676   | 0   | C11orf73  |
| chr3:15232518-15247457    | 2   | CAPN7     |
| chr2:26792130-26793897    | 17  | CENPA     |
| chr3:113395749-113407041  | 4   | CFAP44    |
| chr10:68090183-68093258   | 0   | nogene    |
| chr5:4587902-4593368      | 13  | nogene    |
| chr20:35863012-35871829   | 31  | PHF20     |
| chr2:46086207-46159752    | 0   | PRKCE     |
| chr6:110101587-110127629  | 9   | WASF1     |
| chr7:66278952-66286709    | 50  | TPST1     |
| chr12:28198942-28391411   | 4   | CCDC91    |
| chr6:53273219-53291963    | 20  | ELOVL5    |
| chr19:14402596-14404562   | 15  | ADGRE5    |
| chr19:51965512-51966214   | 3   | ZNF350    |
| chr7:3434176-3440256      | 12  | nogene    |
| chr8:93998702-94020460    | 3   | nogene    |
| chr1:215586494-215595471  | 31  | KCTD3     |
| chr16:88018427-88027650   | 10  | BANP      |
| chr13:35040932-35070852   | 16  | NBEA      |
| chr10:49960135-49969883   | 15  | nogene    |
| chr4:185264437-185267155  | 9   | SNX25     |
| chr22:40117054-40156182   | 43  | TNRC6B    |
| chr2:25628170-25628384    | 21  | DTNB      |
| chr11:2969802-2972243     | 96  | NAP1L4    |
| chr17:63073942-63099357   | 2   | TANC2     |
| chr9:83677726-83677961    | 28  | UBQLN1    |
| chr10:7243557-7285954     | 357 | SFMBT2    |

|                           |     |          |
|---------------------------|-----|----------|
| chr15:100152611-100199423 | 48  | ADAMTS17 |
| chr17:76063975-76067330   | 16  | SRP68    |
| chr7:886055-887519        | 13  | GET4     |
| chr9:92285721-92289426    | 13  | IARS     |
| chr19:40255157-40265351   | 235 | AKT2     |
| chr12:53027781-53037622   | 0   | EIF4B    |
| chr4:83470202-83482244    | 5   | FAM175A  |
| chr1:27578550-27578784    | 0   | nogene   |
| chr7:96191108-96208977    | 15  | SLC25A13 |
| chrX:147924918-147945616  | 27  | FMR1     |
| chr13:30251930-30255615   | 119 | KATNAL1  |
| chr1:23050386-23059234    | 1   | KDM1A    |
| chr10:78035351-78037304   | 12  | RPS24    |
| chr15:24975357-24977029   | 14  | SNRPN    |
| chr21:15014343-15043570   | 18  | NRIP1    |
| chr17:78400676-78401106   | 39  | PGS1     |
| chr9:19298055-19300331    | 4   | DENND4C  |
| chr18:192841-204692       | 16  | USP14    |
| chr21:43004325-43018230   | 17  | PKNOX1   |
| chr19:57813293-57850561   | 12  | ZNF552   |
| chr20:43702489-43713106   | 18  | MYBL2    |
| chr19:45263112-45271708   | 10  | MARK4    |
| chr13:30240459-30255615   | 34  | KATNAL1  |
| chr13:114246946-114272481 | 1   | CDC16    |
| chr1:53772328-53789196    | 23  | NDC1     |
| chr13:29222511-29224162   | 140 | nogene   |
| chr18:21791373-21804014   | 93  | MIB1     |
| chr19:32605834-32607832   | 49  | ANKRD27  |
| chr2:98600528-98604191    | 1   | COA5     |
| chr10:5766240-5800705     | 1   | GDI2     |
| chr11:34685230-34715234   | 0   | nogene   |
| chr10:119904083-119909130 | 11  | SEC23IP  |
| chr8:99442400-99481802    | 6   | VPS13B   |
| chr10:12217360-12238485   | 43  | CDC123   |
| chr10:67908045-67909442   | 13  | SIRT1    |
| chr1:179117331-179118764  | 29  | ABL2     |
| chr1:62803718-62821209    | 27  | ATG4C    |
| chr6:43202715-43205115    | 0   | CUL9     |
| chr18:36353568-36372744   | 20  | FHOD3    |
| chr5:157754853-157755192  | 0   | LSM11    |
| chr16:13105265-13109349   | 1   | nogene   |
| chr17:8508553-8509949     | 11  | MYH10    |
| chr10:14867082-14867909   | 10  | HSPA14   |

|                          |     |            |
|--------------------------|-----|------------|
| chr17:3816115-3822052    | 13  | C17orf85   |
| chr15:51895475-51895854  | 12  | nogene     |
| chr1:41113282-41117010   | 141 | SCMH1      |
| chr5:72855773-72865729   | 64  | TNPO1      |
| chr4:74174505-74180866   | 2   | MTHFD2L    |
| chr17:44805253-44807469  | 14  | GJC1       |
| chr5:80725452-80744615   | 89  | MSH3       |
| chr7:98962301-98971945   | 23  | TRRAP      |
| chr7:99390892-99391253   | 40  | ARPC1B     |
| chr12:51240342-51241116  | 2   | DAZAP2     |
| chr12:12487027-12521463  | 1   | DUSP16     |
| chr5:93824147-93881688   | 12  | FAM172A    |
| chr16:29910977-29912049  | 28  | KCTD13     |
| chrX:136236243-136241277 | 2   | MAP7D3     |
| chr16:83906986-83912367  | 39  | MLYCD      |
| chr6:150955994-150965037 | 61  | MTHFD1L    |
| chr10:68201828-68206903  | 15  | MYPN       |
| chr1:176162868-176184692 | 102 | RFWD2      |
| chr5:95763507-95783963   | 30  | RHOBTB3    |
| chr7:17868406-17893434   | 29  | SNX13      |
| chr3:4410864-4453049     | 2   | SUMF1      |
| chr1:179865435-179865854 | 1   | TOR1AIP2   |
| chr2:106145189-106166083 | 153 | UXS1       |
| chr7:38862544-38869253   | 11  | VPS41      |
| chr6:37929958-38082457   | 8   | ZFAND3     |
| chr17:59731420-59773885  | 120 | VMP1       |
| chr4:99081364-99082116   | 0   | ADH5       |
| chr1:180041137-180048705 | 1   | CEP350     |
| chr12:49097565-49100454  | 2   | LMBR1L     |
| chr1:36170970-36173478   | 86  | MAP7D1     |
| chr1:206728709-206735210 | 0   | MAPKAPK2   |
| chr1:247156405-247159867 | 28  | nogene     |
| chr7:129671428-129690546 | 36  | NRF1       |
| chr18:32111753-32111919  | 0   | RNF138     |
| chr1:15937162-15938006   | 32  | SPEN       |
| chr6:37279303-37287072   | 53  | TBC1D22B   |
| chr17:653290-710613      | 0   | VPS53      |
| chr14:74829212-74835908  | 52  | YLPM1      |
| chr20:25634048-25674007  | 2   | ZNF337-AS1 |
| chr10:76944772-76970067  | 45  | KCNMA1     |
| chr10:74600378-74670269  | 2   | ADK        |
| chr10:32565557-32623817  | 1   | CCDC7      |
| chr9:110972072-111011690 | 613 | LPAR1      |



|                           |     |          |
|---------------------------|-----|----------|
| chr4:75918760-75940165    | 0   | NAAA     |
| chr16:70539455-70539871   | 65  | nogene   |
| chr2:118103196-118108377  | 23  | INSIG2   |
| chr2:203380207-203427269  | 38  | ABI2     |
| chr19:726137-736078       | 112 | PALM     |
| chr9:172080-175784        | 7   | CBWD1    |
| chr2:196669832-196695159  | 15  | CCDC150  |
| chr17:59079753-59104394   | 15  | TRIM37   |
| chr11:128484822-128490576 | 200 | ETS1     |
| chr3:52918483-52928341    | 89  | SFMBT1   |
| chr1:29060421-29097935    | 35  | EPB41    |
| chr17:64591083-64606640   | 393 | SMURF2   |
| chr2:134936840-134942674  | 0   | CCNT2    |
| chr3:56669699-56671692    | 12  | FAM208A  |
| chr5:103003032-103009866  | 59  | PAM      |
| chr2:231235223-231262398  | 2   | ARMC9    |
| chr7:92294888-92345066    | 15  | ANKIB1   |
| chr14:64303475-64330921   | 15  | ESR2     |
| chr6:149572284-149582603  | 89  | GINM1    |
| chr2:10373605-10396920    | 1   | HPCAL1   |
| chr17:59070822-59091340   | 1   | TRIM37   |
| chr17:69259705-69261748   | 0   | ABCA5    |
| chr16:16033108-16036603   | 0   | ABCC1    |
| chr7:65068455-65069757    | 0   | CCT6P3   |
| chr10:126970701-126990603 | 817 | DOCK1    |
| chr12:43452273-43454052   | 11  | ADAMTS20 |
| chr7:102963532-103029418  | 16  | FBXL13   |
| chr1:117911993-117918736  | 93  | GDAP2    |
| chr11:75983386-76016980   | 10  | UVRAG    |
| chr19:47081512-47082295   | 38  | ZC3H4    |
| chr1:92088697-92129776    | 16  | BTBD8    |
| chr10:132645867-132697919 | 20  | INPP5A   |
| chr7:100328835-100332576  | 29  | PMS2P1   |
| chr19:43497117-43497876   | 76  | PHLDB3   |
| chr2:201145377-201149835  | 40  | CFLAR    |
| chr2:46956838-46978907    | 13  | TTC7A    |
| chr1:176043185-176046324  | 45  | RFWD2    |
| chr2:241343751-241348191  | 38  | 2-Sep    |
| chr3:15685225-15690220    | 7   | ANKRD28  |
| chr13:31215050-31229294   | 305 | B3GLCT   |
| chr1:169798856-169827199  | 13  | C1orf112 |
| chr18:45865614-45867748   | 13  | EPG5     |
| chr17:67215898-67218822   | 13  | HELZ     |

|                           |     |          |
|---------------------------|-----|----------|
| chr15:70900921-70936822   | 13  | LRRC49   |
| chr8:17713213-17755961    | 13  | MTUS1    |
| chr1:10008706-10009118    | 13  | nogene   |
| chr3:184318543-184318794  | 13  | nogene   |
| chr7:5391577-5392220      | 65  | nogene   |
| chr20:32511346-32527913   | 0   | NOL4L    |
| chr1:46055794-46077613    | 13  | PIK3R3   |
| chr1:30992389-31007099    | 46  | PUM1     |
| chr7:80810610-80828745    | 92  | SEMA3C   |
| chr5:175492094-175492267  | 3   | SFXN1    |
| chr17:2379035-2381162     | 13  | SGSM2    |
| chr20:13559007-13587370   | 131 | TASP1    |
| chr9:99128854-99149301    | 12  | TGFBR1   |
| chr2:43279764-43293213    | 7   | THADA    |
| chr17:59064354-59070947   | 13  | TRIM37   |
| chr8:15730665-15748465    | 13  | TUSC3    |
| chr7:157163809-157170450  | 48  | UBE3C    |
| chr20:56381432-56386533   | 271 | AURKA    |
| chr2:111831285-111850910  | 16  | ANAPC1   |
| chr5:171899003-171914405  | 0   | FBXW11   |
| chr1:240257944-240392562  | 118 | FMN2     |
| chr19:15272814-15273133   | 54  | BRD4     |
| chr4:189952161-189960839  | 43  | FRG1     |
| chr14:65455620-65629606   | 14  | FUT8     |
| chr6:128218921-128242602  | 27  | PTPRK    |
| chr7:6585015-6585260      | 3   | ZDHC4    |
| chr11:17168676-17169806   | 19  | PIK3C2A  |
| chr16:3749626-3770986     | 29  | CREBBP   |
| chr10:45900346-45916171   | 15  | PARGP1   |
| chr3:12489783-12506835    | 13  | TSEN2    |
| chr2:201723042-201724459  | 4   | ALS2     |
| chr18:31931328-31936291   | 0   | TRAPPC8  |
| chr10:12529821-12553356   | 29  | CAMK1D   |
| chr12:32701414-32711015   | 2   | DNM1L    |
| chr19:45626704-45630046   | 25  | EML2     |
| chr6:84540984-84541709    | 6   | nogene   |
| chr2:32098795-32128479    | 11  | SPAST    |
| chr15:100132006-100133315 | 56  | ADAMTS17 |
| chr20:25413789-25418195   | 73  | GINS1    |
| chr7:102465816-102466270  | 207 | LRWD1    |
| chr8:70159504-70162854    | 108 | NCOA2    |
| chr2:240005209-240022340  | 53  | NDUFA10  |
| chr2:183151507-183161195  | 81  | NUP35    |

|                           |      |          |
|---------------------------|------|----------|
| chr13:100268688-100340259 | 0    | PCCA     |
| chr17:2236491-2244719     | 1    | SMG6     |
| chr1:47269634-47272241    | 2    | STIL     |
| chr15:71141448-71215399   | 0    | THSD4    |
| chr3:185921103-185923984  | 165  | TRA2B    |
| chr15:42810613-42872758   | 50   | TTBK2    |
| chr2:61278164-61284957    | 23   | USP34    |
| chr19:43924237-43931365   | 12   | ZNF45    |
| chr3:51681341-51684634    | 19   | TEX264   |
| chr16:19073920-19075860   | 55   | COQ7     |
| chr3:113341743-113344712  | 4    | CFAP44   |
| chr4:110488540-110491164  | 16   | ENPEP    |
| chrX:131749305-131772563  | 19   | FIRRE    |
| chr2:171053760-171061156  | 3    | TLK1     |
| chr9:111914604-111915836  | 125  | UGCG     |
| chr14:102194937-102209862 | 211  | WDR20    |
| chr3:49423678-49423959    | 4    | nogene   |
| chr10:4830674-4873307     | 11   | AKR1E2   |
| chrX:77656559-77664778    | 13   | ATRX     |
| chr7:140776911-140794467  | 87   | BRAF     |
| chr15:44337762-44338317   | 5    | CASC4    |
| chr5:112985834-112992770  | 5    | DCP2     |
| chr10:472438-486530       | 150  | DIP2C    |
| chr19:45277922-45278615   | 47   | MARK4    |
| chr1:176111068-176111403  | 24   | nogene   |
| chr5:34051881-34064715    | 32   | nogene   |
| chr10:103139405-103181328 | 75   | NT5C2    |
| chr4:87438276-87454455    | 63   | NUDT9    |
| chr7:75474703-75511114    | 1    | POM121C  |
| chr15:59084128-59085785   | 17   | RNF111   |
| chr22:31528689-31531129   | 1    | SFI1     |
| chr1:165743166-165754274  | 2    | TMCO1    |
| chr11:36494975-36501537   | 16   | TRAF6    |
| chr6:42615070-42632904    | 54   | UBR2     |
| chr13:52416016-52442445   | 13   | VPS36    |
| chr4:10097710-10099139    | 33   | WDR1     |
| chr13:24498115-24503777   | 392  | PARP4    |
| chrX:119410189-119417640  | 10   | SLC25A43 |
| chr1:153748688-153757763  | 2    | INTS3    |
| chr12:120154969-120155719 | 3002 | GCN1     |
| chr5:36136308-36143406    | 41   | LMBRD2   |
| chr3:141945430-141946776  | 19   | nogene   |
| chr2:168012633-168075231  | 164  | STK39    |

|                           |     |          |
|---------------------------|-----|----------|
| chr21:36896859-36962170   | 0   | HLCS     |
| chr2:171540807-171541793  | 32  | CYBRD1   |
| chr18:32111753-32118352   | 32  | RNF138   |
| chr5:138517560-138518867  | 25  | ETF1     |
| chr6:12129758-12135892    | 21  | HIVEP1   |
| chr5:38903881-38924595    | 3   | OSMR     |
| chr9:127339644-127342334  | 94  | GARNL3   |
| chr17:82943821-83048785   | 1   | B3GNTL1  |
| chr17:54912665-54939020   | 28  | TOM1L1   |
| chr2:25628170-25652661    | 26  | DTNB     |
| chr15:39860819-39862419   | 13  | nogene   |
| chr1:58713055-58715641    | 15  | nogene   |
| chr9:96827079-96845016    | 74  | ZNF782   |
| chr2:69505568-69507578    | 8   | AAK1     |
| chr6:144537581-144539443  | 54  | UTRN     |
| chr12:100204939-100207786 | 30  | ACTR6    |
| chr17:9022310-9023391     | 14  | NTN1     |
| chr22:41125863-41135906   | 1   | EP300    |
| chr12:124911698-124912072 | 2   | nogene   |
| chr3:72832368-72844423    | 185 | SHQ1     |
| chr7:770470-785897        | 50  | DNAAF5   |
| chr12:123176687-123198334 | 3   | MPHOSPH9 |
| chr2:152542738-152561035  | 52  | FMNL2    |
| chr4:79977620-80036032    | 0   | ANTXR2   |
| chr4:4434769-4471706      | 19  | STX18    |
| chr2:159373044-159374753  | 5   | BAZ2B    |
| chr4:48684672-48780173    | 13  | FRYL     |
| chr4:870710-884086        | 13  | GAK      |
| chr21:36930250-36938994   | 1   | HLCS     |
| chr4:101080531-101109078  | 13  | PPP3CA   |
| chr12:109216617-109216920 | 13  | ACACB    |
| chr20:49063201-49070297   | 13  | CSE1L    |
| chr16:27330065-27342259   | 0   | IL4R     |
| chr11:8983874-8988282     | 0   | NRIP3    |
| chr19:44865119-44874478   | 1   | PVRL2    |
| chr1:109326991-109345878  | 1   | SORT1    |
| chr7:93257393-93259632    | 17  | VPS50    |
| chr13:95161188-95166367   | 49  | ABCC4    |
| chr19:32628721-32643631   | 0   | ANKRD27  |
| chr3:11340644-11358612    | 0   | ATG7     |
| chr19:15272518-15273133   | 0   | BRD4     |
| chr11:74078114-74078717   | 26  | C2CD3    |
| chr3:45089053-45091726    | 0   | CDCP1    |

|                           |     |         |
|---------------------------|-----|---------|
| chr2:207567445-207577655  | 0   | CREB1   |
| chr20:37765196-37803048   | 5   | CTNBL1  |
| chr6:52423945-52454287    | 13  | EFHC1   |
| chr4:2596083-2626577      | 0   | FAM193A |
| chr14:52864400-52864853   | 0   | FERMT2  |
| chr7:55984846-55997449    | 13  | GBAS    |
| chr1:32326938-32327677    | 75  | HDAC1   |
| chr5:119493817-119529980  | 0   | HSD17B4 |
| chr6:108323824-108366332  | 0   | LACE1   |
| chr6:149695073-149702266  | 58  | LATS1   |
| chr16:25132401-25140247   | 0   | LCMT1   |
| chr6:89677569-89688808    | 19  | MDN1    |
| chr12:124466172-124495368 | 0   | NCOR2   |
| chr19:45187330-45187740   | 14  | nogene  |
| chr11:74988586-75005625   | 0   | nogene  |
| chr8:51845660-51861246    | 19  | PCMTD1  |
| chr15:43765449-43766910   | 4   | PDIA3   |
| chr3:170106831-170113519  | 0   | PHC3    |
| chr22:31701655-31712365   | 0   | PRR14L  |
| chr8:140800458-140830526  | 110 | PTK2    |
| chr12:56210296-56216613   | 16  | RNF41   |
| chr6:88904714-88941180    | 29  | RNGTT   |
| chr3:47097954-47114004    | 0   | SETD2   |
| chr17:64571797-64591149   | 15  | SMURF2  |
| chr15:75598278-75621056   | 2   | SNUPN   |
| chr1:15911100-15916279    | 61  | SPEN    |
| chr7:117119560-117138532  | 2   | ST7     |
| chr2:170996652-171014948  | 0   | TLK1    |
| chr9:109033306-109050692  | 28  | TMEM245 |
| chr14:102836809-102903429 | 0   | TRAF3   |
| chr15:42810613-42878684   | 0   | TTBK2   |
| chrX:75293471-75303520    | 0   | UPRT    |
| chr17:623532-661895       | 42  | VPS53   |
| chr2:63259306-63439871    | 13  | WDPCP   |
| chr10:1072115-1086357     | 24  | WDR37   |
| chr14:72981788-72993357   | 0   | ZFYVE1  |
| chr14:72977926-72978969   | 0   | ZFYVE1  |
| chr19:51877281-51880877   | 91  | ZNF577  |
| chr1:45330515-45334511    | 13  | MUTYH   |
| chr9:93497470-93498886    | 18  | FAM120A |
| chr5:75354502-75356448    | 2   | HMGCR   |
| chr2:39278406-39286964    | 16  | MAP4K3  |
| chr10:4830674-4837581     | 3   | AKR1E2  |

|                           |     |          |
|---------------------------|-----|----------|
| chr22:31738386-31738911   | 110 | PRR14L   |
| chr2:119962615-119967972  | 5   | PTPN4    |
| chr2:45976428-45984680    | 82  | PRKCE    |
| chr2:178331551-178333041  | 0   | OSBPL6   |
| chr19:34208928-34219877   | 12  | LSM14A   |
| chr1:167765582-167773368  | 124 | MPZL1    |
| chr1:219193129-219218712  | 48  | LYPLAL1  |
| chr5:181239066-181242345  | 28  | GNB2L1   |
| chr12:50427761-50437838   | 19  | LARP4    |
| chr4:177353307-177360677  | 150 | NEIL3    |
| chr11:65503728-65504595   | 30  | nogene   |
| chr2:218715900-218716514  | 28  | nogene   |
| chr2:183178806-183182680  | 165 | nogene   |
| chr22:46792519-46797620   | 27  | TBC1D22A |
| chr6:13316570-13321095    | 2   | TBC1D7   |
| chr10:102488149-102489138 | 5   | ACTR1A   |
| chr5:73840479-73858219    | 20  | ARHGEF28 |
| chr12:122771753-122792121 | 0   | CCDC62   |
| chr16:57167092-57173869   | 36  | FAM192A  |
| chr12:31293804-31298224   | 70  | FAM60A   |
| chr3:15258830-15262289    | 0   | SH3BP5   |
| chr20:4883641-4902558     | 0   | SLC23A2  |
| chr12:827041-830160       | 121 | WNK1     |
| chr1:15649719-15651895    | 17  | DDI2     |
| chr15:76292430-76295737   | 142 | ETFA     |
| chr4:158891445-158895865  | 14  | FNIP2    |
| chr11:77332729-77343931   | 4   | PAK1     |
| chr3:32357372-32370026    | 31  | CMTM8    |
| chr1:235455558-235484515  | 61  | B3GALNT2 |
| chr11:93723040-93724375   | 0   | CEP295   |
| chr1:197583151-197645743  | 24  | DENND1B  |
| chr10:21882281-21920963   | 115 | DNAJC1   |
| chr14:31173155-31178254   | 0   | HECTD1   |
| chr1:39047035-39047987    | 1   | nogene   |
| chr12:56666203-56671847   | 0   | PTGES3   |
| chr1:172551511-172579267  | 61  | SUCO     |
| chr4:75448466-75455855    | 5   | nogene   |
| chr1:155265859-155266895  | 234 | CLK2     |
| chr1:155915872-155917672  | 43  | KIAA0907 |
| chr13:52457143-52457568   | 18  | nogene   |
| chr20:13483226-13610919   | 16  | TASP1    |
| chr2:206866696-206881891  | 4   | nogene   |
| chr12:105189990-105195501 | 19  | APPL2    |

|                          |     |          |
|--------------------------|-----|----------|
| chr6:14131519-14135909   | 37  | CD83     |
| chr17:45030091-45034999  | 3   | DCAKD    |
| chr13:30208514-30241086  | 3   | KATNAL1  |
| chr7:6469595-6474284     | 91  | KDELR2   |
| chr14:39179090-39179462  | 366 | PNN      |
| chr3:47083719-47088247   | 0   | SETD2    |
| chr4:80335692-80362884   | 3   | C4orf22  |
| chr15:66484989-66487292  | 6   | MAP2K1   |
| chr2:182751657-182762801 | 16  | DNAJC10  |
| chr16:3194833-3195245    | 0   | nogene   |
| chr15:71411686-71476935  | 0   | THSD4    |
| chr6:75272463-75272955   | 6   | nogene   |
| chr5:178211889-178231523 | 16  | PHYKPL   |
| chr13:24477700-24493733  | 183 | PARP4    |
| chr5:134158454-134174022 | 208 | SKP1     |
| chr5:143037195-143057747 | 38  | ARHGAP26 |
| chr10:37803832-37838111  | 9   | ZNF248   |
| chr14:29915175-29918288  | 1   | nogene   |
| chr13:45149769-45207505  | 32  | GTF2F2   |
| chr1:2135261-2150978     | 38  | PRKCZ    |
| chr5:139278326-139279129 | 272 | SNHG4    |
| chr15:55327530-55334007  | 7   | PIGB     |
| chr16:89895037-89904205  | 4   | TCF25    |
| chr20:49255807-49260577  | 1   | ZNFX1    |
| chr16:4259010-4259243    | 29  | nogene   |
| chr20:47246007-47254424  | 1   | ZMYND8   |
| chr6:85530191-85542043   | 23  | SNX14    |
| chr7:24744561-24749793   | 174 | DFNA5    |
| chr3:186105304-186105942 | 70  | ETV5     |
| chr16:58716013-58719255  | 79  | GOT2     |
| chr9:98060781-98060997   | 2   | NANS     |
| chr9:14179726-14307520   | 1   | NFIB     |
| chr10:34359146-34360259  | 15  | PARD3    |
| chr5:34922216-34923234   | 79  | BRIX1    |
| chr5:154294815-154329738 | 4   | GALNT10  |
| chr8:47729996-47730981   | 28  | nogene   |
| chr3:47423932-47428670   | 16  | SCAP     |
| chr11:47411925-47412467  | 13  | SLC39A13 |
| chr15:43432193-43438416  | 4   | TP53BP1  |
| chr8:61682438-61684188   | 2   | ASPH     |
| chr11:9283370-9299701    | 20  | TMEM41B  |
| chr9:2720343-2777994     | 0   | nogene   |
| chr8:140668268-140686694 | 0   | PTK2     |

|                           |     |          |
|---------------------------|-----|----------|
| chr12:49496832-49500205   | 195 | SPATS2   |
| chr2:43485233-43508780    | 18  | THADA    |
| chr12:112090725-112093136 | 43  | NAA25    |
| chr11:36036102-36038184   | 18  | LDLRAD3  |
| chr7:156724111-156728720  | 17  | LMBR1    |
| chr6:100625191-100631213  | 21  | ASCC3    |
| chr2:20326260-20333063    | 56  | PUM2     |
| chr16:27533290-27545523   | 11  | GTF3C1   |
| chr16:50078740-50079018   | 20  | HEATR3   |
| chr1:212020121-212021212  | 4   | INTS7    |
| chr11:94435831-94447438   | 8   | MRE11A   |
| chr1:246186742-246207459  | 63  | nogene   |
| chr1:46269529-46269888    | 29  | nogene   |
| chr9:128459566-128461067  | 16  | ODF2     |
| chr6:147205970-147239270  | 72  | STXBP5   |
| chr1:172924598-172933643  | 5   | nogene   |
| chr20:35721739-35732135   | 87  | RBM39    |
| chr4:145033041-145064692  | 1   | ANAPC10  |
| chr1:175004613-175008706  | 55  | CACYBP   |
| chr20:63424176-63446837   | 27  | KCNQ2    |
| chr20:37207272-37210165   | 70  | RPN2     |
| chr15:63529013-63563008   | 161 | USP3     |
| chr12:10882216-10883096   | 5   | PRH1     |
| chr14:65455620-65458207   | 10  | FUT8     |
| chr16:70463168-70465176   | 73  | FUK      |
| chr1:205616477-205627874  | 29  | nogene   |
| chr8:100259106-100275161  | 23  | RNF19A   |
| chr2:201760880-201761818  | 314 | ALS2     |
| chr11:118581245-118592856 | 0   | ARCN1    |
| chr1:94177611-94178167    | 1   | ARHGAP29 |
| chr2:231206197-231259102  | 0   | ARMC9    |
| chr2:175080659-175121540  | 99  | ATF2     |
| chr22:41117186-41127748   | 0   | EP300    |
| chr12:56562416-56564227   | 1   | RBMS2    |
| chr9:2181570-2186228      | 14  | SMARCA2  |
| chr6:158083428-158084174  | 3   | SYNJ2    |
| chr10:101939862-102040125 | 1   | C10orf76 |
| chr12:96323947-96334865   | 369 | CDK17    |
| chr1:20893516-20904971    | 5   | EIF4G3   |
| chr9:122313226-122322745  | 64  | MRRF     |
| chr18:68897218-68897682   | 51  | CCDC102B |
| chr7:66712166-66712957    | 15  | RABGEF1  |
| chr6:75817500-75832947    | 35  | MYO6     |



|                           |     |           |
|---------------------------|-----|-----------|
| chr17:27304779-27311616   | 9   | WSB1      |
| chr1:155415743-155439068  | 9   | ASH1L     |
| chr16:304303-314683       | 120 | AXIN1     |
| chr9:16552529-16583085    | 0   | BNC2      |
| chr1:150620889-150627592  | 0   | ENSA      |
| chr6:36470051-36484824    | 1   | KCTD20    |
| chr3:42630545-42632823    | 0   | NKTR      |
| chr11:65504325-65504595   | 0   | nogene    |
| chr12:65886621-65887306   | 0   | nogene    |
| chr17:78079394-78083166   | 1   | TNRC6C    |
| chr8:73805650-73825249    | 0   | UBE2W     |
| chr4:84708908-84721572    | 4   | WDFY3     |
| chr2:32290482-32307190    | 0   | YIPF4     |
| chr12:53033805-53037622   | 20  | EIF4B     |
| chr14:102870184-102871968 | 18  | TRAF3     |
| chr3:197130526-197140264  | 18  | DLG1      |
| chr3:134183001-134195182  | 51  | RYK       |
| chr10:12087534-12120267   | 1   | DHTKD1    |
| chr4:150588047-150683717  | 27  | LRBA      |
| chr10:13172375-13183100   | 25  | MCM10     |
| chr4:67728539-67730170    | 2   | nogene    |
| chr14:60114699-60125823   | 28  | PCNXL4    |
| chr2:223998114-224001922  | 128 | SERPINE2  |
| chr8:134509618-134532972  | 2   | ZFAT      |
| chr12:49460769-49500205   | 26  | SPATS2    |
| chr17:37568790-37585430   | 4   | SYNRG     |
| chr8:690897-692612        | 42  | ERICH1    |
| chr12:104991711-104996026 | 312 | C12orf45  |
| chr14:91188909-91199905   | 0   | C14orf159 |
| chr1:226295841-226301205  | 18  | LIN9      |
| chr19:12813082-12813565   | 103 | RNASEH2A  |
| chr20:38040434-38066256   | 154 | RPRD1B    |
| chr2:128113083-128129179  | 3   | UGGT1     |
| chr6:73440208-73440445    | 72  | MB21D1    |
| chr9:105520622-105520916  | 26  | nogene    |
| chr9:107302034-107325004  | 62  | RAD23B    |
| chr12:54182503-54183959   | 1   | SMUG1     |
| chr3:128897631-128904505  | 1   | ACAD9     |
| chr2:233449981-233452060  | 216 | DGKD      |
| chr8:43064100-43083180    | 0   | FNTA      |
| chr8:15623079-15673836    | 34  | TUSC3     |
| chr12:118079345-118082429 | 0   | VSIG10    |
| chr19:36058779-36068010   | 1   | WDR62     |

|                           |     |              |
|---------------------------|-----|--------------|
| chr9:37819287-37842286    | 15  | DCAF10       |
| chr18:21765771-21798228   | 25  | MIB1         |
| chr1:171523220-171527844  | 125 | PRRC2C       |
| chr6:57050773-57055797    | 83  | KIAA1586     |
| chr15:44379689-44380976   | 25  | CASC4        |
| chr7:2002064-2004848      | 38  | MAD1L1       |
| chr3:170136418-170136665  | 3   | PHC3         |
| chr15:79845157-79846856   | 46  | nogene       |
| chr11:12138389-12162419   | 39  | MICAL2       |
| chr2:159001079-159097834  | 12  | TANC1        |
| chr2:45546316-45562756    | 28  | SRBD1        |
| chr12:120177446-120190400 | 0   | GCN1         |
| chr9:100320264-100321771  | 25  | TEX10        |
| chr4:128466607-128470216  | 0   | LOC100507487 |
| chr8:144160969-144192401  | 0   | MROH1        |
| chr19:17159394-17168064   | 2   | MYO9B        |
| chr14:50792711-50822077   | 23  | NIN          |
| chr2:189791789-189844080  | 3   | PMS1         |
| chr17:29480367-29482288   | 0   | TAOK1        |
| chr21:41226265-41246063   | 20  | BACE2        |
| chr1:45654542-45659142    | 2   | GPBP1L1      |
| chr7:105285790-105297533  | 13  | SRPK2        |
| chr4:1900625-1904378      | 410 | WHSC1        |
| chr3:130930415-130941699  | 219 | ATP2C1       |
| chr10:43154896-43160595   | 28  | CSGALNACT2   |
| chr2:43918024-43918398    | 17  | LRPPRC       |
| chr17:31169890-31206371   | 28  | NF1          |
| chr17:7665713-7666178     | 13  | nogene       |
| chrX:140783174-140784659  | 4   | nogene       |
| chr22:38474232-38474623   | 2   | KDELR3       |
| chr12:79285786-79299551   | 2   | SYT1         |
| chr14:64439095-64441453   | 49  | MTHFD1       |
| chr19:43186341-43203973   | 7   | PSG5         |
| chr17:16164978-16171995   | 7   | NCOR1        |
| chr4:82866807-82872086    | 16  | SEC31A       |
| chr16:23424748-23445961   | 0   | COG7         |
| chr19:13808835-13809220   | 16  | ZSWIM4       |
| chr18:7754372-7755920     | 0   | nogene       |
| chr19:36081432-36084744   | 0   | WDR62        |
| chr7:74187610-74189918    | 1   | EIF4H        |
| chr6:163478779-163535125  | 2   | QKI          |
| chr3:8921538-8941804      | 13  | RAD18        |
| chr18:79410402-79433738   | 26  | NFATC1       |

|                           |     |          |
|---------------------------|-----|----------|
| chr5:135172499-135174172  | 13  | C5orf66  |
| chr1:93674613-93674941    | 279 | BCAR3    |
| chr9:539515-594080        | 1   | KANK1    |
| chr1:223804173-223806947  | 185 | TP53BP2  |
| chr1:85321412-85324883    | 45  | DDAH1    |
| chr3:57890040-57909150    | 3   | SLMAP    |
| chr2:202755537-202759353  | 33  | FAM117B  |
| chr11:68780639-68793402   | 2   | CPT1A    |
| chr7:98937155-98937820    | 2   | TRRAP    |
| chr14:75100991-75107487   | 4   | NEK9     |
| chr5:160252882-160259771  | 20  | CCNJL    |
| chr1:42265114-42278672    | 300 | FOXJ3    |
| chr19:5071009-5082504     | 1   | KDM4B    |
| chr19:48127276-48128020   | 17  | LIG1     |
| chr16:12042896-12129758   | 5   | SNX29    |
| chr6:24416396-24418578    | 171 | MRS2     |
| chr9:120536371-120539164  | 16  | CDK5RAP2 |
| chr11:72867864-72921950   | 7   | FCHSD2   |
| chr10:92637183-92639900   | 24  | KIF11    |
| chr2:232701710-232702153  | 18  | nogene   |
| chr16:68859883-68867220   | 16  | TANGO6   |
| chr6:82957311-83044659    | 64  | UBE3D    |
| chr10:45625950-45639963   | 43  | ZFAND4   |
| chr3:44929305-44945292    | 4   | ZDHHC3   |
| chr17:82171700-82179189   | 14  | CCDC57   |
| chr7:22960255-22964531    | 51  | FAM126A  |
| chr13:31147958-31150182   | 14  | HSPH1    |
| chr11:14867505-14869630   | 23  | PDE3B    |
| chr2:227531090-227536993  | 73  | AGFG1    |
| chr11:108227594-108229323 | 164 | ATM      |
| chr15:74619196-74620225   | 26  | CLK3     |
| chr5:180549930-180553471  | 158 | CNOT6    |
| chr20:17969800-17970130   | 27  | MGME1    |
| chr7:158644288-158646563  | 243 | NCAPG2   |
| chr19:3568768-3569352     | 17  | nogene   |
| chr16:3067983-3081818     | 41  | IL32     |
| chr4:147946616-147966839  | 198 | ARHGAP10 |
| chr13:26337566-26353880   | 469 | CDK8     |
| chr7:6425987-6435020      | 78  | DAGLB    |
| chr9:93527154-93543471    | 1   | FAM120A  |
| chr7:130120748-130122202  | 125 | KLHDC10  |
| chr14:50199690-50204409   | 11  | SOS2     |
| chr1:120160383-120163370  | 0   | SEC22B   |

|                           |     |          |
|---------------------------|-----|----------|
| chr2:32087491-32116212    | 0   | SPAST    |
| chrX:123888618-123900693  | 4   | XIAP     |
| chr3:183736717-183762279  | 9   | YEATS2   |
| chr1:45421724-45457871    | 4   | TESK2    |
| chr11:31456259-31473786   | 7   | IMMP1L   |
| chr12:108813128-108813482 | 13  | nogene   |
| chr11:33043749-33054725   | 23  | TCP11L1  |
| chr2:26230191-26234355    | 10  | HADHA    |
| chr2:63196121-63201291    | 1   | nogene   |
| chr3:15735409-15737233    | 11  | ANKRD28  |
| chr12:123340987-123350441 | 14  | SBNO1    |
| chr12:116985205-116988869 | 287 | FBXW8    |
| chr10:80468546-80489314   | 26  | TSPAN14  |
| chr4:41013582-41014398    | 227 | APBB2    |
| chr10:42787167-42790511   | 122 | BMS1     |
| chr3:113399905-113416627  | 8   | CFAP44   |
| chr21:46496987-46511614   | 60  | DIP2A    |
| chr20:18427066-18443464   | 0   | DZANK1   |
| chr9:93470328-93498886    | 38  | FAM120A  |
| chr9:127332273-127339751  | 20  | GARNL3   |
| chr9:96458378-96484659    | 1   | HABP4    |
| chr12:26695605-26716242   | 3   | ITPR2    |
| chr22:33761370-33830209   | 4   | LARGE    |
| chr2:43912431-43948518    | 0   | LRPPRC   |
| chr14:75103841-75124223   | 15  | NEK9     |
| chr3:170097171-170128836  | 5   | nogene   |
| chr16:10747142-10752678   | 6   | NUBP1    |
| chr17:59697561-59697978   | 0   | PTRH2    |
| chr2:32193888-32209561    | 0   | SLC30A6  |
| chr1:24646666-24649029    | 20  | SRRM1    |
| chr14:21211809-21234229   | 26  | HNRNPC   |
| chr7:156724111-156763795  | 14  | LMBR1    |
| chr18:79096475-79154555   | 94  | ATP9B    |
| chr1:235470849-235496308  | 40  | B3GALNT2 |
| chr3:32733422-32737490    | 85  | CNOT10   |
| chr8:73947289-73947932    | 20  | nogene   |
| chr20:44582584-44589866   | 16  | PKIG     |
| chr9:92256679-92269983    | 300 | IARS     |
| chr10:68393137-68396881   | 16  | RUFY2    |
| chr11:125602302-125604247 | 42  | STT3A    |
| chr1:113829591-113834439  | 5   | PTPN22   |
| chr14:30581075-30589484   | 1   | G2E3     |
| chrX:85067126-85074391    | 165 | APOOL    |

|                           |     |          |
|---------------------------|-----|----------|
| chr1:243293090-243344331  | 13  | SDCCAG8  |
| chr1:224398096-224399034  | 8   | WDR26    |
| chr3:141913651-141922063  | 27  | ATP1B3   |
| chr4:77058506-77066405    | 13  | CCNI     |
| chr1:100995109-101021765  | 19  | DPH5     |
| chr17:79078328-79079154   | 21  | nogene   |
| chr4:84678167-84679242    | 23  | WDFY3    |
| chr2:9502172-9510131      | 3   | ADAM17   |
| chr22:32478980-32487828   | 33  | FBXO7    |
| chr16:70563875-70565524   | 18  | SF3B3    |
| chr4:147939824-147966839  | 193 | ARHGAP10 |
| chr5:138319218-138328529  | 102 | CDC25C   |
| chr5:131315975-131316144  | 16  | CDC42SE2 |
| chr6:130885095-130890466  | 1   | EPB41L2  |
| chr16:57153810-57173869   | 5   | FAM192A  |
| chr7:65891227-65899620    | 20  | nogene   |
| chr4:80301282-80420400    | 3   | nogene   |
| chr2:135162554-135176443  | 38  | RAB3GAP1 |
| chr20:37044085-37047190   | 24  | RBL1     |
| chr2:223878528-223894339  | 1   | WDFY1    |
| chr12:76841962-76846679   | 13  | ZDHHC17  |
| chr21:45120793-45134832   | 19  | ADARB1   |
| chr1:212016885-212021212  | 2   | INTS7    |
| chr16:70226769-70231158   | 0   | nogene   |
| chr6:37279303-37291357    | 31  | TBC1D22B |
| chr14:101994985-101995300 | 4   | DYNC1H1  |
| chr14:96552479-96556413   | 0   | PAPOLA   |
| chr19:18863437-18864251   | 45  | UPF1     |
| chr3:45089053-45093657    | 20  | CDCP1    |
| chr6:127314815-127331030  | 33  | ECHDC1   |
| chr8:47595810-47612965    | 12  | SPIDR    |
| chr15:49292326-49292537   | 23  | GALK2    |
| chr3:119863418-119905852  | 146 | GSK3B    |
| chr15:22534067-22534243   | 30  | HERC2P2  |
| chr3:141509567-141540609  | 73  | RASA2    |
| chr4:25154997-25159107    | 168 | SEPSECS  |
| chr17:4282797-4307123     | 321 | UBE2G1   |
| chr2:32401162-32406557    | 3   | BIRC6    |
| chr16:68287322-68287871   | 33  | SLC7A6   |
| chr10:91939951-91942568   | 39  | BTAF1    |
| chr5:138191473-138202155  | 3   | CDC23    |
| chr14:102999564-103012188 | 50  | CDC42BPB |
| chr3:45095346-45110841    | 0   | CDCP1    |

|                           |     |                |
|---------------------------|-----|----------------|
| chr14:80497468-80530886   | 123 | CEP128         |
| chr19:14409893-14410215   | 14  | DDX39A         |
| chr1:15536474-15536814    | 25  | DNAJC16        |
| chr1:206597099-206600308  | 0   | EIF2D          |
| chr19:55688869-55689950   | 0   | EPN1           |
| chr7:8003907-8071131      | 24  | GLCCI1         |
| chr9:92249857-92251885    | 0   | IARS           |
| chr12:30649136-30653092   | 0   | IPO8           |
| chr6:18161326-18166378    | 14  | KDM1B          |
| chr13:23805949-23841488   | 79  | MIPEP          |
| chr9:22301599-22303231    | 5   | nogene         |
| chrX:68192918-68299096    | 23  | OPHN1          |
| chr7:24820174-24842413    | 0   | OSBPL3         |
| chr2:241325992-241343093  | 41  | 2-Sep          |
| chr17:19542392-19549677   | 47  | SLC47A1        |
| chr6:85557975-85574378    | 257 | SNX14          |
| chr6:35888814-35891013    | 0   | SRPK1          |
| chr15:43385790-43386330   | 14  | TUBGCP4        |
| chr11:47797778-47798463   | 31  | NUP160         |
| chr10:112527086-112668998 | 6   | VTI1A          |
| chrX:150793690-150795486  | 18  | CD99L2         |
| chr7:130203787-130204110  | 27  | TMEM209        |
| chr3:123223558-123259589  | 149 | SEC22A         |
| chr18:45928868-45952643   | 26  | EPG5           |
| chr1:32036909-32039573    | 70  | KHDRBS1        |
| chr14:88626837-88644511   | 18  | EML5           |
| chr10:68025545-68044558   | 84  | HERC4          |
| chr5:145796441-145823134  | 26  | PRELID2        |
| chr3:47610065-47638780    | 23  | SMARCC1        |
| chr20:36607714-36609730   | 156 | TGIF2-C20orf24 |
| chr8:91018389-91021404    | 20  | TMEM55A        |
| chr2:61498672-61526521    | 15  | XPO1           |
| chr17:4051970-4058155     | 12  | ZZEF1          |
| chr3:10046579-10049505    | 102 | FANCD2         |
| chr7:128574719-128592017  | 4   | nogene         |
| chr1:1637761-1704655      | 151 | CDK11B         |
| chr5:173090314-173091401  | 9   | CREBRF         |
| chr20:49849578-49864844   | 2   | SLC9A8         |
| chr12:98677424-98686873   | 8   | APAF1          |
| chr1:243552728-243843282  | 1   | AKT3           |
| chr15:34003031-34005851   | 18  | AVEN           |
| chr18:35974895-35977600   | 0   | C18orf21       |
| chr9:36197550-36204179    | 0   | CLTA           |

|                           |     |          |
|---------------------------|-----|----------|
| chr11:44114184-44130138   | 4   | EXT2     |
| chr2:156549607-156557582  | 12  | GPD2     |
| chr18:23515855-23516423   | 18  | C18orf8  |
| chr10:7363877-7381949     | 2   | SFMBT2   |
| chr2:43571706-43575027    | 5   | THADA    |
| chr3:179719939-179721589  | 56  | USP13    |
| chr5:77449759-77463226    | 10  | WDR41    |
| chr11:34957383-34984728   | 58  | PDHX     |
| chr19:40736985-40737769   | 34  | ITPKC    |
| chr3:142777631-142792967  | 23  | TRPC1    |
| chr7:2244562-2250002      | 35  | NUDT1    |
| chr1:92702140-92704744    | 29  | EVI5     |
| chr8:73552011-73688813    | 2   | STAU2    |
| chr2:61284874-61293550    | 56  | USP34    |
| chr5:179705678-179709059  | 184 | CANX     |
| chr7:44700140-44701615    | 35  | OGDH     |
| chr6:52469332-52479787    | 31  | EFHC1    |
| chr6:37279303-37284464    | 12  | TBC1D22B |
| chr4:40890363-40934699    | 1   | APBB2    |
| chr3:57583897-57584464    | 148 | ARF4     |
| chr11:74113779-74123135   | 0   | C2CD3    |
| chr6:17507168-17513954    | 143 | CAP2     |
| chr6:24475120-24479959    | 31  | GPLD1    |
| chr11:68403482-68416527   | 12  | LRP5     |
| chr11:129266866-129269715 | 12  | nogene   |
| chr1:113705889-113712113  | 1   | PHTF1    |
| chr1:64777622-64789514    | 102 | RAVER2   |
| chr3:141993537-142093127  | 1   | TFDP2    |
| chrX:123696020-123703505  | 12  | THOC2    |
| chr9:83677726-83686155    | 211 | UBQLN1   |
| chr8:38347496-38348215    | 23  | WHSC1L1  |
| chr3:195306510-195333123  | 27  | ACAP2    |
| chr2:38343267-38343512    | 8   | ATL2     |
| chr10:102023476-102040125 | 26  | C10orf76 |
| chr9:120536371-120568388  | 4   | CDK5RAP2 |
| chr2:85368685-85369830    | 4   | ELMOD3   |
| chr7:102854776-102884312  | 50  | FBXL13   |
| chr10:27165063-27165539   | 65  | MASTL    |
| chr6:89749222-89750532    | 27  | MDN1     |
| chr22:37678064-37678848   | 12  | nogene   |
| chr1:5927648-5986327      | 56  | NPHP4    |
| chr13:28266714-28270866   | 19  | PAN3     |
| chr12:110545879-110551968 | 31  | PPTC7    |

|                           |     |          |
|---------------------------|-----|----------|
| chr3:149852515-149921227  | 3   | RNF13    |
| chr5:74750578-74751493    | 28  | GFM2     |
| chr22:38499399-38501280   | 14  | DDX17    |
| chr19:41245144-41245508   | 18  | nogene   |
| chr17:5308693-5332152     | 45  | RABEP1   |
| chr11:108315822-108317521 | 17  | ATM      |
| chr8:123021446-123030716  | 54  | DERL1    |
| chr11:32588593-32589135   | 13  | EIF3M    |
| chr11:44107682-44171742   | 33  | EXT2     |
| chr3:172295362-172310881  | 59  | FNDC3B   |
| chr17:82571723-82587272   | 16  | FOXK2    |
| chr1:117918596-117920424  | 40  | GDAP2    |
| chr10:7778837-7780307     | 13  | KIN      |
| chr19:49866527-49867021   | 29  | nogene   |
| chr14:35307993-35310895   | 2   | PSMA6    |
| chr11:18086865-18089510   | 16  | SAAL1    |
| chr2:241342991-241343897  | 28  | 2-Sep    |
| chr1:100896569-100921841  | 0   | SLC30A7  |
| chr4:183663846-183668117  | 17  | TRAPPC11 |
| chr18:74781427-74920692   | 1   | ZNF407   |
| chr20:49639677-49643650   | 2   | B4GALT5  |
| chr14:80878745-80906081   | 0   | CEP128   |
| chr9:89314719-89315297    | 13  | CKS2     |
| chr13:42155290-42174144   | 0   | DGKH     |
| chr19:47362475-47362693   | 331 | DHX34    |
| chr10:119051198-119056853 | 15  | EIF3A    |
| chr7:148817876-148819687  | 18  | EZH2     |
| chr5:137985256-138019146  | 3   | FAM13B   |
| chr5:108897658-108959347  | 3   | FER      |
| chr5:109781395-109804277  | 37  | MAN2A1   |
| chr7:131375423-131397376  | 0   | MKLN1    |
| chr6:75822781-75832947    | 19  | MYO6     |
| chr4:80287336-80301329    | 3   | nogene   |
| chr10:37745216-37745548   | 1   | nogene   |
| chr7:44484967-44485622    | 1   | NUDCD3   |
| chr11:47791929-47801930   | 0   | NUP160   |
| chr3:111112029-111147484  | 135 | PVRL3    |
| chr5:69373829-69374711    | 20  | RAD17    |
| chr19:19198106-19199234   | 11  | RFXANK   |
| chr10:100937401-100950753 | 71  | SLF2     |
| chr18:47851273-47870564   | 0   | SMAD2    |
| chr8:76704042-76778439    | 0   | ZFHX4    |
| chr12:106842588-106860412 | 20  | RIC8B    |



|                           |      |           |
|---------------------------|------|-----------|
| chr19:14479411-14480778   | 12   | GIPC1     |
| chr2:171028338-171046362  | 193  | TLK1      |
| chr17:37330172-37339850   | 7    | ACACA     |
| chr15:61094355-61112119   | 15   | nogene    |
| chr17:45513867-45517282   | 120  | LRRC37A4P |
| chr6:15651312-15660521    | 1    | DTNBP1    |
| chr1:88770351-88786213    | 220  | PKN2      |
| chr10:102023476-102025248 | 11   | C10orf76  |
| chr4:2630934-2639859      | 18   | FAM193A   |
| chr1:204525483-204532246  | 14   | MDM4      |
| chr20:58667489-58671297   | 37   | STX16     |
| chr4:17909093-17972885    | 13   | LCORL     |
| chr5:65170616-65226219    | 12   | ADAMTS6   |
| chr10:4830674-4842504     | 71   | AKR1E2    |
| chr13:111217678-111233293 | 18   | ARHGEF7   |
| chr15:72566562-72572165   | 28   | ARIH1     |
| chr21:29305203-29329693   | 115  | BACH1     |
| chr6:34606554-34646798    | 164  | C6orf106  |
| chr11:128758114-128772985 | 39   | FLI1      |
| chr18:47130243-47136449   | 20   | HDHD2     |
| chr1:146943290-146946607  | 6    | NBPF12    |
| chrX:126243345-126302446  | 1    | nogene    |
| chr4:13425109-13428299    | 29   | nogene    |
| chr9:97138642-97139954    | 61   | nogene    |
| chr6:124996574-125058106  | 1    | RNF217    |
| chr19:11723232-11725327   | 1    | ZNF823    |
| chr2:27987992-28129380    | 7    | BRE       |
| chr1:16130765-16131348    | 19   | nogene    |
| chr1:155925631-155927156  | 56   | KIAA0907  |
| chr5:134942480-134960728  | 1    | nogene    |
| chr10:11936544-11952249   | 15   | UPF2      |
| chr6:150882761-150887981  | 2    | MTHFD1L   |
| chr2:219213589-219214186  | 0    | ABCB6     |
| chr2:222933165-222934687  | 0    | ACSL3     |
| chr19:40458154-40458545   | 48   | BLVRB     |
| chr10:32451591-32474023   | 310  | CCDC7     |
| chr6:117519815-117545597  | 4    | DCBLD1    |
| chr6:35312301-35312772    | 17   | DEF6      |
| chr20:18441592-18443464   | 0    | DZANK1    |
| chr11:128484822-128486146 | 0    | ETS1      |
| chr18:21366026-21403994   | 116  | GREB1L    |
| chr17:44082584-44083854   | 1    | HDAC5     |
| chr6:29888466-29943026    | 2859 | HLA-H     |

|                           |    |          |
|---------------------------|----|----------|
| chr3:129288853-129290804  | 0  | HMCES    |
| chrX:53645310-53680186    | 57 | HUWE1    |
| chr2:202785917-202819899  | 12 | ICA1L    |
| chrX:51895052-51897271    | 14 | MAGED1   |
| chr2:74159090-74172752    | 16 | MOB1A    |
| chr18:36215515-36220217   | 26 | MOCOS    |
| chr18:36203112-36213482   | 2  | MOCOS    |
| chr9:98075569-98078347    | 61 | NANS     |
| chr5:142131807-142144676  | 42 | NDFIP1   |
| chr7:93786566-93797279    | 16 | nogene   |
| chr1:36405818-36410593    | 0  | nogene   |
| chr21:45728675-45738571   | 0  | nogene   |
| chr10:67975124-67975444   | 18 | nogene   |
| chr8:144402866-144405295  | 2  | nogene   |
| chr12:87566994-87715112   | 0  | nogene   |
| chr4:39895496-39896758    | 0  | nogene   |
| chr19:29645261-29664207   | 0  | nogene   |
| chr6:85471236-85471425    | 0  | NT5E     |
| chr1:212329134-212345933  | 1  | PPP2R5A  |
| chr19:799412-806556       | 20 | PTBP1    |
| chr14:67823541-67865139   | 55 | RAD51B   |
| chr3:49972058-50054395    | 0  | RBM6     |
| chr17:32173830-32192299   | 13 | RHOT1    |
| chr7:105551569-105555227  | 2  | RINT1    |
| chr5:179593477-179594963  | 7  | RUFY1    |
| chr1:179302676-179307216  | 1  | SOAT1    |
| chr6:42612170-42617507    | 32 | UBR2     |
| chr11:102203987-102206074 | 7  | YAP1     |
| chr8:47712661-47713641    | 24 | SPIDR    |
| chr11:43815436-43840064   | 7  | HSD17B12 |
| chr7:111214884-111216267  | 12 | nogene   |
| chr4:61934839-61948276    | 4  | ADGRL3   |
| chr2:215332381-215333457  | 1  | ATIC     |
| chr7:33604864-33642918    | 1  | BBS9     |
| chr4:3086938-3099394      | 6  | HTT      |
| chr15:78465250-78466489   | 40 | IREB2    |
| chr1:202755270-202764145  | 4  | KDM5B    |
| chr7:98137314-98159425    | 24 | LMTK2    |
| chr4:150870524-150872755  | 6  | LRBA     |
| chr5:151853271-151857893  | 1  | nogene   |
| chr6:33302906-33303205    | 7  | nogene   |
| chr12:123012612-123014042 | 60 | PITPNM2  |
| chr3:156677656-156696025  | 80 | TIPARP   |

|                           |      |          |
|---------------------------|------|----------|
| chr19:45521321-45522818   | 93   | VASP     |
| chr6:18236451-18258405    | 109  | DEK      |
| chr6:90560075-90571807    | 18   | MAP3K7   |
| chr22:28296197-28297852   | 785  | TTC28    |
| chr5:141928150-141930274  | 12   | KIAA0141 |
| chr4:23592788-23634627    | 12   | nogene   |
| chr4:159238808-159304473  | 12   | RAPGEF2  |
| chr4:122927636-122947488  | 12   | SPATA5   |
| chr12:106245903-106246469 | 23   | nogene   |
| chr5:69585593-69586356    | 37   | GTF2H2B  |
| chr17:59731420-59735473   | 10   | VMP1     |
| chr1:24797741-24827116    | 43   | CLIC4    |
| chr1:6231901-6232119      | 42   | ICMT     |
| chr16:27708704-27708920   | 2    | KIAA0556 |
| chr4:56403039-56406701    | 34   | PPAT     |
| chr1:145747994-145751510  | 1    | RNF115   |
| chr12:111470107-111470742 | 32   | ATXN2    |
| chr12:78049992-78059115   | 202  | NAV3     |
| chr1:235419472-235430804  | 4    | TBCE     |
| chr7:152263015-152265209  | 145  | KMT2C    |
| chr1:25989447-25990863    | 1    | PAFAH2   |
| chr13:19741564-19759418   | 37   | PSPC1    |
| chr12:95251939-95266632   | 17   | VEZT     |
| chr1:92563641-92607727    | 52   | EVI5     |
| chr5:108946129-108959347  | 94   | FER      |
| chr6:87621353-87622013    | 14   | ORC3     |
| chr7:98899421-98903517    | 1    | TRRAP    |
| chr5:65988634-65994864    | 1429 | ERBB2IP  |
| chr17:83084937-83085323   | 12   | METRNL   |
| chr6:159775169-159777456  | 2    | ACAT2    |
| chr1:203710876-203722689  | 0    | ATP2B4   |
| chr19:38838396-38840559   | 0    | HNRNPL   |
| chr3:47706408-47714490    | 27   | SMARCC1  |
| chr13:24286213-24290884   | 15   | SPATA13  |
| chr17:82889667-82900731   | 18   | TBCD     |
| chr19:34443843-34445121   | 40   | UBA2     |
| chr9:36344831-36353331    | 3    | RNF38    |
| chr9:19093170-19096769    | 20   | HAUS6    |
| chr1:203720548-203722689  | 0    | ATP2B4   |
| chr4:42503449-42543986    | 17   | ATP8A1   |
| chr2:170852713-170854022  | 19   | GAD1     |
| chr14:92803060-92806963   | 0    | GOLGA5   |
| chr8:42957093-42964474    | 371  | HOOK3    |

|                           |     |                 |
|---------------------------|-----|-----------------|
| chr4:142145839-142160561  | 2   | INPP4B          |
| chr10:7759889-7766103     | 24  | KIN             |
| chr10:72475099-72508269   | 16  | MICU1           |
| chr21:36333645-36349408   | 2   | MORC3           |
| chr1:43588730-43592601    | 17  | PTPRF           |
| chr1:176116623-176149074  | 36  | RFWD2           |
| chr12:120554717-120565529 | 1   | RNF10           |
| chr1:77736055-77739417    | 0   | USP33           |
| chr1:85775673-85786461    | 1   | COL24A1         |
| chr2:190659157-190687317  | 5   | NAB1            |
| chr9:105721536-105748190  | 37  | TMEM38B         |
| chr4:1900625-1935262      | 367 | WHSC1           |
| chr7:139053450-139055295  | 3   | ZC3HAV1         |
| chr17:60679452-60747279   | 30  | BCAS3           |
| chr4:151482523-151588926  | 8   | FAM160A1        |
| chr1:226265532-226287797  | 11  | LIN9            |
| chr6:43055896-43056445    | 19  | MRPL2           |
| chr18:12370848-12371691   | 21  | AFG3L2          |
| chr15:85639373-85669830   | 0   | AKAP13          |
| chr2:111872629-111880849  | 27  | ANAPC1          |
| chr19:16506700-16509988   | 0   | C19orf44        |
| chr20:3916926-3918796     | 12  | PANK2           |
| chr2:70214348-70216994    | 2   | TIA1            |
| chr3:9810620-9813345      | 9   | TTLL3           |
| chr2:169891164-169896735  | 12  | UBR3            |
| chr17:42728824-42730918   | 3   | EZH1            |
| chr10:68973544-68974743   | 40  | DDX21           |
| chr17:75660954-75661708   | 3   | RECQL5          |
| chr1:225123526-225185425  | 3   | DNAH14          |
| chr2:118096418-118109900  | 17  | INSIG2          |
| chr7:66638252-66639228    | 1   | KCTD7           |
| chr8:58631495-58635546    | 1   | NSMAF           |
| chr2:171006146-171007063  | 2   | TLK1            |
| chr10:74089195-74094461   | 31  | VCL             |
| chr11:129040927-129164427 | 38  | ARHGAP32        |
| chr12:68696818-68702784   | 9   | NUP107          |
| chr3:141368620-141404015  | 1   | ZBTB38          |
| chr2:202275112-202282472  | 12  | NOP58           |
| chr5:177191883-177239865  | 12  | NSD1            |
| chr9:128122361-128123134  | 12  | PTGES2          |
| chr5:140537337-140539083  | 1   | ANKHD1-EIF4EBP3 |
| chr13:40942951-40943925   | 0   | ELF1            |
| chr9:100264821-100284603  | 0   | INVS            |

|                           |     |          |
|---------------------------|-----|----------|
| chr10:88309386-88314641   | 12  | RNLS     |
| chr4:76163224-76166301    | 0   | SCARB2   |
| chr20:62859363-62860308   | 0   | TCFL5    |
| chr5:14297071-14336727    | 20  | TRIO     |
| chr2:99321954-99327653    | 7   | TXNDC9   |
| chrX:23730526-23736016    | 1   | ACOT9    |
| chr1:97515725-97573970    | 1   | DPYD     |
| chr17:47590716-47592545   | 10  | NPEPPS   |
| chr3:149846010-149902162  | 19  | RNF13    |
| chr5:179567460-179577136  | 17  | RUFY1    |
| chr16:28121669-28132403   | 5   | XPO6     |
| chr4:142108092-142129023  | 1   | INPP4B   |
| chr16:68266592-68297476   | 20  | SLC7A6   |
| chr12:113267842-113269845 | 28  | TPCN1    |
| chr16:28101457-28101945   | 95  | XPO6     |
| chr6:116399197-116399662  | 15  | DSE      |
| chr15:90439331-90441684   | 7   | IQGAP1   |
| chr1:70306223-70315566    | 0   | ANKRD13C |
| chr9:127788692-127789137  | 0   | CDK9     |
| chr19:19465339-19474167   | 0   | GATAD2A  |
| chr10:842931-885760       | 19  | LARP4B   |
| chr18:14265934-14266153   | 0   | nogene   |
| chr2:27583657-27608039    | 0   | ZNF512   |
| chr11:72984087-73083740   | 23  | FCHSD2   |
| chr18:42037691-42049605   | 6   | PIK3C3   |
| chrX:155298784-155299145  | 27  | CLIC2    |
| chr16:13934191-13935743   | 82  | ERCC4    |
| chr6:44248629-44253598    | 1   | HSP90AB1 |
| chr4:142082030-142112682  | 2   | INPP4B   |
| chr19:57843848-57844240   | 26  | nogene   |
| chr6:73638411-73641924    | 3   | SLC17A5  |
| chr3:98756368-98773983    | 16  | ST3GAL6  |
| chr20:18628126-18744271   | 1   | DTD1     |
| chr9:135850136-135883078  | 171 | CAMSAP1  |
| chr5:123545416-123557564  | 631 | CSNK1G3  |
| chr4:24554724-24570847    | 18  | DHX15    |
| chr8:140800458-140819020  | 29  | PTK2     |
| chr17:64212573-64214242   | 102 | TEX2     |
| chr11:61366117-61367998   | 7   | TMEM138  |
| chr16:58574608-58583182   | 78  | CNOT1    |
| chr3:10087133-10088950    | 18  | FANCD2   |
| chr5:14673641-14693094    | 70  | OTULIN   |
| chr2:65090982-65104806    | 7   | RAB1A    |

|                           |     |         |
|---------------------------|-----|---------|
| chr20:13623445-13630152   | 71  | TASP1   |
| chr4:1900625-1918623      | 262 | WHSC1   |
| chr22:28694031-28695873   | 83  | CHEK2   |
| chr15:65702304-65706224   | 28  | DENND4A |
| chr9:19350701-19352693    | 12  | DENND4C |
| chr9:83663874-83669327    | 1   | UBQLN1  |
| chr19:12623699-12624710   | 27  | ZNF791  |
| chr4:83467453-83472288    | 0   | FAM175A |
| chr12:68733451-68735344   | 17  | NUP107  |
| chr19:5653114-5657347     | 12  | SAFB    |
| chr2:63856305-63857936    | 373 | UGP2    |
| chr5:80455691-80474830    | 5   | ZFYVE16 |
| chr17:42838092-42839012   | 5   | PSME3   |
| chr8:30612298-30635123    | 1   | GTF2E2  |
| chr5:115831321-115837764  | 2   | ATG12   |
| chr12:50453459-50467120   | 21  | LARP4   |
| chr1:179063926-179066859  | 0   | FAM20B  |
| chr2:32501712-32505205    | 12  | BIRC6   |
| chr1:20744743-20745656    | 12  | HP1BP3  |
| chr6:17632649-17640064    | 16  | NUP153  |
| chr20:37203884-37213865   | 99  | RPN2    |
| chr21:37108391-37138714   | 2   | TTC3    |
| chr5:149509878-149513209  | 57  | CSNK1A1 |
| chr4:47744401-47786925    | 12  | CORIN   |
| chr12:31398174-31402643   | 1   | DENND5B |
| chr10:37833024-37838111   | 1   | ZNF248  |
| chr11:64320660-64321874   | 5   | PRDX5   |
| chr11:119271734-119274953 | 35  | CBL     |
| chr7:137912990-137916012  | 20  | CREB3L2 |
| chr3:155893517-155925366  | 0   | GMPS    |
| chr14:44945029-44945928   | 10  | KLHL28  |
| chr4:80295558-80420400    | 0   | nogene  |
| chr11:65326387-65326786   | 19  | nogene  |
| chr2:33563477-33567204    | 0   | nogene  |
| chr9:122957010-122990213  | 0   | RABGAP1 |
| chr5:814760-825251        | 0   | ZDHHC11 |
| chr14:24209889-24211829   | 14  | CHMP4A  |
| chr22:29571938-29572179   | 1   | nogene  |
| chr4:22389087-22413814    | 32  | ADGRA3  |
| chr1:15767375-15768630    | 18  | FBLIM1  |
| chr7:64814917-64817335    | 37  | ZNF138  |
| chr6:36894503-36914693    | 7   | C6orf89 |
| chr7:92350949-92371607    | 17  | ANKIB1  |

|                           |      |           |
|---------------------------|------|-----------|
| chr22:45692995-45718493   | 25   | ATXN10    |
| chr10:35031299-35033273   | 6    | CUL2      |
| chr3:197085579-197116083  | 47   | DLG1      |
| chr8:61680967-61684188    | 4922 | ASPH      |
| chr6:43012925-43013389    | 3    | MEA1      |
| chr18:21838364-21844253   | 9    | MIB1      |
| chr6:107921796-107924932  | 15   | SEC63     |
| chr3:9365015-9371536      | 15   | THUMPD3   |
| chr17:19920035-19963022   | 23   | AKAP10    |
| chr7:157339971-157367483  | 2    | DNAJB6    |
| chr2:47408400-47429941    | 10   | MSH2      |
| chr10:32726733-32729457   | 3    | CCDC7     |
| chr1:158072178-158072661  | 33   | nogene    |
| chr15:28245880-28263169   | 15   | HERC2     |
| chr11:118551785-118559864 | 35   | IFT46     |
| chr1:41070594-41161432    | 21   | SCMH1     |
| chr9:137586966-137588718  | 20   | ZMYND19   |
| chr8:102838743-102843747  | 85   | AZIN1     |
| chr2:10654480-10668723    | 24   | NOL10     |
| chr7:208897-248430        | 50   | FAM20C    |
| chr5:75354502-75355522    | 5    | HMGCR     |
| chr9:22820737-22821707    | 33   | LINC01239 |
| chr4:185247293-185264498  | 12   | SNX25     |
| chr12:51073822-51074082   | 56   | CSRNP2    |
| chr6:53269086-53291963    | 147  | ELOVL5    |
| chr15:49588015-49611268   | 21   | FAM227B   |
| chr6:52266074-52273916    | 0    | MCM3      |
| chr6:129539175-129558166  | 3    | nogene    |
| chr13:40602879-40603334   | 0    | nogene    |
| chr6:63646526-63646795    | 19   | PHF3      |
| chr4:1108342-1111821      | 158  | RNF212    |
| chr20:44503814-44506996   | 14   | SERINC3   |
| chr10:100937401-100956537 | 0    | SLF2      |
| chr4:26717932-26748526    | 21   | TBC1D19   |
| chr13:113635976-113640375 | 0    | TFDP1     |
| chr6:158501677-158504178  | 18   | TULP4     |
| chr4:110506636-110520366  | 12   | ENPEP     |
| chr5:21491320-21501826    | 63   | GUSBP1    |
| chr11:65434478-65435145   | 20   | nogene    |
| chr7:135635580-135638683  | 12   | NUP205    |
| chr11:581491-587464       | 60   | PHRF1     |
| chr21:43004325-43013238   | 31   | PKNOX1    |
| chr16:70556178-70561784   | 14   | SF3B3     |

|                           |     |          |
|---------------------------|-----|----------|
| chr13:60444682-60483846   | 12  | TDRD3    |
| chr18:76849525-76871825   | 276 | ZNF236   |
| chr14:35651804-35659196   | 52  | RALGAPA1 |
| chr19:48999318-48999833   | 16  | RUVBL2   |
| chr4:53383772-53414722    | 2   | FIP1L1   |
| chr1:117402185-117502970  | 1   | MAN1A2   |
| chr5:10381799-10394785    | 13  | 6-Mar    |
| chr10:93363960-93369776   | 10  | MYOF     |
| chr20:35727252-35727606   | 20  | nogene   |
| chr8:42444645-42465917    | 0   | SLC20A2  |
| chr7:157216866-157257044  | 0   | UBE3C    |
| chr2:27238430-27239798    | 28  | CAD      |
| chr7:23611170-23611553    | 725 | CCDC126  |
| chr1:32657426-32662337    | 13  | RBBP4    |
| chr13:59833106-59861536   | 3   | DIAPH3   |
| chr1:225185290-225207220  | 18  | DNAH14   |
| chr12:112229697-112233085 | 7   | HECTD4   |
| chr1:43569589-43592601    | 27  | PTPRF    |
| chr20:36660336-36671397   | 39  | NDRG3    |
| chr1:197539963-197583253  | 4   | DENND1B  |
| chr6:160046497-160048543  | 94  | IGF2R    |
| chr1:45334390-45334967    | 7   | MUTYH    |
| chr1:213104453-213176492  | 0   | RPS6KC1  |
| chr10:68401619-68404844   | 1   | RUFY2    |
| chr3:100713642-100728858  | 0   | TFG      |
| chr7:19055252-19056165    | 17  | nogene   |
| chr16:57248536-57250507   | 3   | ARL2BP   |
| chr17:50964549-50964840   | 12  | nogene   |
| chr12:76450850-76487618   | 43  | OSBPL8   |
| chr19:34464025-34467014   | 15  | UBA2     |
| chr3:130967144-130969396  | 31  | ATP2C1   |
| chr10:96858291-96907747   | 47  | LCOR     |
| chrX:154399337-154399941  | 15  | RPL10    |
| chr19:17197791-17200829   | 2   | MYO9B    |
| chr12:122557383-122562699 | 25  | KNTC1    |
| chr12:50179828-50180440   | 16  | nogene   |
| chr8:10826151-10834775    | 82  | PINX1    |
| chr7:66799322-66805396    | 23  | RABGEF1  |
| chr17:56847921-56862251   | 2   | DGKE     |
| chr8:73688653-73739868    | 103 | STAU2    |
| chr11:61334619-61345946   | 18  | TKFC     |
| chr10:102361021-102363798 | 12  | GBF1     |
| chr9:95907077-95928864    | 2   | ERCC6L2  |



|                           |     |         |
|---------------------------|-----|---------|
| chr8:43064100-43072307    | 26  | FNTA    |
| chr11:68505144-68537891   | 78  | PPP6R3  |
| chr6:45003652-45365301    | 51  | SUPT3H  |
| chr10:13197622-13198807   | 23  | MCM10   |
| chr3:122437169-122452064  | 10  | KPNA1   |
| chr14:103654563-103657776 | 17  | KLC1    |
| chr18:12718516-12720683   | 38  | PSMG2   |
| chr15:51869216-51902036   | 19  | TMOD3   |
| chr19:56576712-56578278   | 9   | ZNF470  |
| chr3:197115926-197119530  | 366 | DLG1    |
| chr9:69732138-69750950    | 40  | PTAR1   |
| chr19:10143765-10143987   | 19  | DNMT1   |
| chr1:44757555-44759348    | 17  | KIF2C   |
| chr17:82889667-82903478   | 19  | TBCD    |
| chr15:63774693-63775649   | 47  | HERC1   |
| chr16:48258617-48262872   | 25  | LONP2   |
| chr6:52267864-52281674    | 13  | MCM3    |
| chr9:22301599-22467906    | 1   | nogene  |
| chr10:110964124-110985765 | 275 | SHOC2   |
| chr16:8929368-8930397     | 173 | USP7    |
| chr7:73700377-73700931    | 3   | nogene  |
| chr18:46890579-46891054   | 98  | PIAS2   |
| chr18:79193182-79277196   | 0   | ATP9B   |
| chr10:132749516-13277782  | 0   | INPP5A  |
| chr4:123028185-123090705  | 16  | SPATA5  |
| chr12:78864997-79047362   | 0   | SYT1    |
| chr4:1900625-1901251      | 10  | WHSC1   |
| chr14:103662115-103670283 | 6   | KLC1    |
| chr16:53919557-53934109   | 0   | FTO     |
| chr15:41053928-41056706   | 0   | INO80   |
| chr3:51490154-51492488    | 0   | nogene  |
| chr14:105352377-105355177 | 0   | PACS2   |
| chr1:113705889-113706722  | 0   | PHTF1   |
| chr7:66991136-66994282    | 9   | SBDS    |
| chr1:93582300-93592393    | 14  | BCAR3   |
| chr11:130260855-130261929 | 500 | ZBTB44  |
| chr5:14270824-14280436    | 167 | TRIO    |
| chr8:53795646-53817530    | 4   | ATP6V1H |
| chr10:111000414-111004794 | 1   | SHOC2   |
| chr16:4724749-4727177     | 14  | ANKS3   |
| chr12:124362125-124363799 | 46  | NCOR2   |
| chr10:27526827-27533994   | 40  | RAB18   |
| chr7:1009949-1010300      | 15  | C7orf50 |

|                           |     |              |
|---------------------------|-----|--------------|
| chr19:879936-881714       | 18  | MED16        |
| chr1:955922-957273        | 61  | NOC2L        |
| chr11:126203344-126205781 | 36  | RPUSD4       |
| chr1:1564604-1564916      | 97  | SSU72        |
| chr19:52282110-52283413   | 429 | ZNF766       |
| chr2:200997444-201011472  | 0   | FAM126B      |
| chr5:138561579-138567561  | 19  | HSPA9        |
| chr1:25983945-25984528    | 0   | PAFAH2       |
| chr13:24446680-24447186   | 1   | PARP4        |
| chr19:29980158-30012531   | 26  | URI1         |
| chr19:58260850-58263676   | 43  | ZNF544       |
| chr5:139614696-139623461  | 11  | UBE2D2       |
| chr12:118019071-118022359 | 27  | RFC5         |
| chrX:155116056-155120168  | 34  | BRCC3        |
| chr20:26018831-26019924   | 24  | LOC100134868 |
| chr15:40571603-40571900   | 13  | RPUSD2       |
| chr17:58999380-59001714   | 8   | TRIM37       |
| chr12:89603042-89604346   | 13  | ATP2B1       |
| chr11:68793314-68796933   | 48  | CPT1A        |
| chr7:6737075-6737936      | 26  | PMS2CL       |
| chr18:54277702-54287411   | 152 | POLI         |
| chr19:38141183-38142710   | 264 | SIPA1L3      |
| chr7:92294888-92333720    | 27  | ANKIB1       |
| chr1:156785469-156785847  | 26  | nogene       |
| chr17:69255542-69256283   | 4   | ABCA5        |
| chr12:68715626-68731719   | 21  | NUP107       |
| chr5:14270824-14297263    | 19  | TRIO         |
| chr1:150817919-150823345  | 6   | ARNT         |
| chr10:68906710-68910382   | 42  | DDX50        |
| chr8:61548070-61567318    | 5   | ASPH         |
| chr6:84194883-84200905    | 13  | CEP162       |
| chr10:68430435-68437241   | 14  | DNA2         |
| chr1:51402434-51406108    | 3   | EPS15        |
| chr12:1289851-1408247     | 94  | ERC1         |
| chr4:83463493-83469151    | 23  | FAM175A      |
| chr4:41406138-41412198    | 1   | nogene       |
| chr12:116230532-116240462 | 15  | nogene       |
| chr21:41847089-41860372   | 1   | PRDM15       |
| chr1:52854464-52867777    | 13  | ZYG11A       |
| chr16:30664214-30667622   | 29  | FBRS         |
| chr6:26426241-26428785    | 13  | BTN2A3P      |
| chr2:8888017-8958642      | 56  | MBOAT2       |
| chr17:54938923-54947312   | 23  | TOM1L1       |

|                           |     |           |
|---------------------------|-----|-----------|
| chr8:142343965-142354763  | 1   | TSNARE1   |
| chr14:90644047-90680535   | 14  | TTC7B     |
| chr7:33367766-33388144    | 71  | BBS9      |
| chr7:55982209-55984878    | 23  | GBAS      |
| chr22:46310827-46311172   | 16  | nogene    |
| chr10:15833629-15843272   | 38  | FAM188A   |
| chr21:44032090-44052476   | 31  | TRAPPC10  |
| chr13:75326196-75349302   | 4   | TBC1D4    |
| chr20:43613849-43620925   | 26  | IFT52     |
| chr16:47311239-47459175   | 26  | ITFG1     |
| chr1:85025938-85045362    | 18  | MCOLN3    |
| chrX:65075843-65113813    | 8   | nogene    |
| chr10:122393180-122424959 | 1   | PLEKHA1   |
| chr9:6843508-6893232      | 0   | KDM4C     |
| chr18:23763404-23784157   | 0   | LAMA3     |
| chr2:72968447-73058596    | 0   | SFXN5     |
| chr6:161022009-161034449  | 175 | MAP3K4    |
| chr11:77619605-77625818   | 499 | CLNS1A    |
| chr11:65894013-65894497   | 4   | FOSL1     |
| chr17:281767-321415       | 56  | RPH3AL    |
| chr6:129629352-129634105  | 27  | ARHGAP18  |
| chr3:197814907-197817302  | 8   | LRCH3     |
| chr4:1918140-1935262      | 20  | WHSC1     |
| chr12:328834-334422       | 0   | KDM5A     |
| chr3:101398860-101417790  | 0   | SENP7     |
| chr17:82571723-82584188   | 19  | FOXK2     |
| chr17:80994580-80995758   | 29  | CHMP6     |
| chr17:47328268-47345098   | 14  | EFCAB13   |
| chr5:177619077-177632738  | 67  | LOC202181 |
| chr3:57657679-57672438    | 35  | DENND6A   |
| chr2:157857464-157860179  | 4   | nogene    |
| chr1:93648040-93650141    | 12  | nogene    |
| chr20:17955364-17957037   | 125 | SNX5      |
| chr10:69155811-69158211   | 28  | VPS26A    |
| chr7:66795510-66810847    | 2   | RABGEF1   |
| chr12:111525191-111555919 | 20  | ATXN2     |
| chr11:104950924-105000495 | 51  | CASP4     |
| chr9:92268173-92269983    | 298 | IARS      |
| chr1:235434203-235437474  | 9   | TBCE      |
| chr12:121502582-121503065 | 17  | nogene    |
| chr10:18556308-18558216   | 83  | nogene    |
| chr2:241325992-241343897  | 3   | 2-Sep     |
| chr15:65722847-65732818   | 1   | DENND4A   |

|                           |     |              |
|---------------------------|-----|--------------|
| chr6:130022226-130094367  | 12  | L3MBTL3      |
| chr20:20022455-20026919   | 4   | NAA20        |
| chr2:218463305-218466176  | 42  | USP37        |
| chr7:6135840-6145656      | 12  | USP42        |
| chr16:11894953-11896785   | 121 | GSPT1        |
| chr8:98526741-98548161    | 57  | STK3         |
| chr5:14286870-14336727    | 74  | TRIO         |
| chr13:23805949-23886506   | 388 | MIPEP        |
| chr20:33669374-33672422   | 1   | NECAB3       |
| chr3:51416786-51418876    | 8   | VPRBP        |
| chr4:20709682-20727397    | 1   | PACRGL       |
| chr8:81670938-81681584    | 68  | IMPA1        |
| chr5:72887069-72888303    | 17  | TNPO1        |
| chr19:8455404-8471427     | 24  | HNRNPM       |
| chr14:54995602-55002185   | 18  | WDHD1        |
| chr15:89113724-89155534   | 14  | ABHD2        |
| chr2:65239851-65265175    | 14  | ACTR2        |
| chr2:9517900-9543285      | 18  | ADAM17       |
| chr12:98706484-98708704   | 0   | APAF1        |
| chr12:111485270-111486824 | 81  | ATXN2        |
| chr2:74526717-74528935    | 0   | AUP1         |
| chr3:113249721-113250833  | 14  | BOC          |
| chr11:86306244-86306482   | 30  | C11orf73     |
| chr6:31835410-31837435    | 2   | C6orf48      |
| chrX:15692962-15764775    | 0   | CA5BP1       |
| chr3:45112082-45112445    | 3   | CDCP1        |
| chr5:116091078-116092700  | 21  | COMMD10      |
| chr2:203289764-203296563  | 26  | CYP20A1      |
| chr2:135930481-135933990  | 1   | DARS         |
| chr8:141175199-141180854  | 33  | DENND3       |
| chr3:154280578-154295339  | 0   | DHX36        |
| chr10:77853353-77856892   | 25  | DLG5         |
| chr21:36237261-36238701   | 0   | DOPEY2       |
| chr15:55385599-55399929   | 0   | DYX1C1-CCPG1 |
| chr7:36281114-36297187    | 35  | EEPD1        |
| chrX:24057420-24057754    | 72  | EIF2S3       |
| chr7:2376949-2379511      | 12  | EIF3B        |
| chr1:28993329-28997319    | 17  | EPB41        |
| chr1:44247938-44339322    | 23  | ERI3         |
| chr4:158697558-158703591  | 1   | ETFDH        |
| chr10:92893348-92895020   | 6   | EXOC6        |
| chr12:117004435-117010450 | 11  | FBXW8        |
| chr8:11808793-11809850    | 30  | FDFT1        |

|                           |     |           |
|---------------------------|-----|-----------|
| chr7:65960951-65976202    | 1   | GUSB      |
| chr14:61732417-61734285   | 0   | HIF1A     |
| chr1:212006638-212017023  | 13  | INTS7     |
| chr7:130094894-130116666  | 0   | KLHDC10   |
| chr1:225412453-225419798  | 11  | LBR       |
| chr7:130945719-131052555  | 4   | LINC-PINT |
| chr13:23837551-23886506   | 63  | MIPEP     |
| chr10:21614830-21651768   | 2   | MLLT10    |
| chr6:30619492-30619989    | 74  | MRPS18B   |
| chr12:76053090-76053909   | 107 | NAP1L1    |
| chr16:15694164-15696860   | 4   | NDE1      |
| chr17:35139234-35140066   | 33  | NLE1      |
| chr16:58150393-58150686   | 0   | nogene    |
| chr2:203152168-203152375  | 0   | nogene    |
| chr3:129857249-129880594  | 0   | nogene    |
| chr1:151300529-151301325  | 0   | nogene    |
| chr22:35388704-35389537   | 1   | nogene    |
| chr3:189343453-189385040  | 0   | nogene    |
| chr7:66742726-66743178    | 34  | nogene    |
| chr16:70156473-70156870   | 0   | nogene    |
| chrX:2345569-2345915      | 0   | nogene    |
| chr11:102192824-102204122 | 0   | nogene    |
| chr17:46692902-46728934   | 1   | NSF       |
| chr21:46381693-46385983   | 75  | PCNT      |
| chr4:88038250-88065879    | 2   | PKD2      |
| chr4:105396248-105434161  | 25  | PPA2      |
| chr5:134200984-134206131  | 0   | PPP2CA    |
| chr1:3186124-3186474      | 3   | PRDM16    |
| chr6:31623731-31628239    | 0   | PRRC2A    |
| chr1:31918969-31919364    | 0   | PTP4A2    |
| chr8:127969415-127989291  | 14  | PVT1      |
| chr8:60569954-60584815    | 0   | RAB2A     |
| chr2:226864603-226908878  | 15  | RHBDD1    |
| chr19:32990513-32991969   | 14  | RHPN2     |
| chr7:105542407-105555227  | 0   | RINT1     |
| chr12:120539367-120546601 | 7   | RNF10     |
| chr17:30984616-30988106   | 30  | RNF135    |
| chr6:45470323-45492114    | 0   | RUNX2     |
| chr6:130184102-130216616  | 0   | SAMD3     |
| chr1:243293090-243426558  | 13  | SDCCAG8   |
| chr13:29522316-29553860   | 57  | SLC7A1    |
| chr4:143526280-143528714  | 0   | SMARCA5   |
| chr17:31940285-31988497   | 13  | SUZ12     |

|                           |     |           |
|---------------------------|-----|-----------|
| chr10:58388189-58390860   | 24  | TFAM      |
| chr7:98933240-98937820    | 0   | TRRAP     |
| chr16:2065518-2080377     | 18  | TSC2      |
| chr1:154260891-154266568  | 10  | UBAP2L    |
| chr3:196362293-196372042  | 2   | UBXN7     |
| chr19:36712385-36712867   | 64  | ZNF567    |
| chr12:104861290-104928694 | 8   | SLC41A2   |
| chr9:19356971-19358160    | 32  | DENND4C   |
| chr8:143638645-143638987  | 13  | nogene    |
| chr20:33550640-33556738   | 8   | nogene    |
| chr13:32648753-32678929   | 26  | PDS5B     |
| chr2:42261120-42264731    | 14  | EML4      |
| chr20:39001729-39006356   | 34  | DHX35     |
| chr2:11782200-11783922    | 5   | LPIN1     |
| chr2:20254862-20256170    | 59  | PUM2      |
| chr8:53743576-53769743    | 5   | ATP6V1H   |
| chr2:75518055-75522487    | 200 | EVA1A     |
| chr15:63622814-63624327   | 6   | HERC1     |
| chr19:34215123-34215661   | 33  | LSM14A    |
| chr12:57069233-57072912   | 32  | NEMP1     |
| chr12:116712234-116714201 | 8   | nogene    |
| chr6:136064380-136111101  | 0   | nogene    |
| chr14:23301878-23302159   | 23  | PPP1R3E   |
| chr11:68601862-68603492   | 119 | PPP6R3    |
| chr9:131455075-131459356  | 98  | PRRC2B    |
| chr18:12801969-12859254   | 4   | PTPN2     |
| chr1:243304712-243316893  | 53  | SDCCAG8   |
| chr7:84110469-84194668    | 0   | SEMA3A    |
| chr10:27122840-27126786   | 23  | YME1L1    |
| chr6:87601783-87622013    | 2   | ORC3      |
| chr14:91481575-91490802   | 62  | PPP4R3A   |
| chr11:9286454-9295387     | 3   | TMEM41B   |
| chr20:13569506-13587370   | 104 | TASP1     |
| chr2:113927344-113942359  | 4   | ACTR3     |
| chr2:37282541-37293271    | 17  | PRKD3     |
| chr14:24210347-24210768   | 52  | CHMP4A    |
| chr15:90713166-90715042   | 121 | CRTC3-AS1 |
| chr9:136862905-136863871  | 2   | EDF1      |
| chr18:45928868-45934966   | 2   | EPG5      |
| chr12:109959846-109961685 | 3   | GIT2      |
| chr5:57246299-57249576    | 26  | GPBP1     |
| chr15:67646230-67703408   | 64  | MAP2K5    |
| chr19:311844-313643       | 56  | MIER2     |

|                           |     |          |
|---------------------------|-----|----------|
| chr5:14270824-14287063    | 113 | TRIO     |
| chr3:183070998-183071357  | 143 | MCCC1    |
| chr10:68072882-68073686   | 17  | HERC4    |
| chr2:172568740-172593048  | 14  | PDK1     |
| chr8:81815324-81829516    | 7   | SNX16    |
| chr1:5873251-5880239      | 8   | NPHP4    |
| chr10:3112221-3116846     | 20  | PFKP     |
| chr8:99431536-99467634    | 4   | VPS13B   |
| chr9:37495168-37498224    | 8   | POLR1E   |
| chr3:47736033-47745993    | 68  | SMARCC1  |
| chr2:173954872-173956232  | 139 | SP3      |
| chr2:53919150-53927483    | 4   | PSME4    |
| chr11:9961956-10002689    | 14  | SBF2     |
| chr1:75749418-75750546    | 33  | ACADM    |
| chr11:118583178-118590506 | 1   | ARCN1    |
| chr6:106248149-106308491  | 40  | ATG5     |
| chr16:87975047-87981127   | 74  | BANP     |
| chr7:45063917-45064646    | 5   | CCM2     |
| chr9:95901992-95916434    | 0   | ERCC6L2  |
| chr10:63176296-63177856   | 4   | JMJD1C   |
| chr13:32648753-32659280   | 0   | PDS5B    |
| chr3:141509567-141516431  | 1   | RASA2    |
| chr15:57231151-57234107   | 106 | TCF12    |
| chr22:26540788-26544675   | 1   | TPST2    |
| chr8:15659506-15673836    | 3   | TUSC3    |
| chr4:20467751-20491899    | 31  | SLIT2    |
| chr18:31645354-31666372   | 2   | B4GALT6  |
| chr2:36396613-36517542    | 19  | CRIM1    |
| chr1:44874677-44880008    | 19  | EIF2B3   |
| chr6:31271598-31356442    | 169 | HLA-C    |
| chr20:16378804-16381747   | 19  | KIF16B   |
| chr1:172797452-172851482  | 5   | nogene   |
| chr11:120406117-120437382 | 15  | ARHGEF12 |
| chr12:122777490-122777683 | 16  | CCDC62   |
| chr10:68142939-68166666   | 13  | MYPN     |
| chr17:16143605-16153395   | 4   | NCOR1    |
| chrX:71554512-71555385    | 1   | OGT      |
| chr5:88220562-88245792    | 210 | TMEM161B |
| chr10:68740628-68742569   | 7   | CCAR1    |
| chr1:28459084-28466768    | 41  | PHACTR4  |
| chr2:46001403-46010517    | 20  | PRKCE    |
| chr17:59764970-59773944   | 17  | VMP1     |
| chr9:94923985-94956015    | 38  | C9orf3   |

|                           |     |          |
|---------------------------|-----|----------|
| chr8:60794985-60801593    | 193 | CHD7     |
| chr2:73946718-73957240    | 0   | DGUOK    |
| chr11:86250295-86256512   | 98  | EED      |
| chr5:93776158-93824267    | 0   | FAM172A  |
| chr16:58709416-58718300   | 0   | GOT2     |
| chr1:23814189-23820593    | 91  | HMGCL    |
| chr3:131162407-131170887  | 12  | NEK11    |
| chr4:47875126-47894302    | 16  | NFXL1    |
| chr17:40394625-40395031   | 26  | nogene   |
| chr19:16080914-16101409   | 80  | nogene   |
| chrX:24745417-24752353    | 25  | POLA1    |
| chr9:113286231-113288264  | 20  | PRPF4    |
| chr20:2975214-2988474     | 0   | PTPRA    |
| chr18:7755322-7774271     | 3   | PTPRM    |
| chr1:51269955-51271473    | 14  | RNF11    |
| chr16:58677325-58678894   | 2   | SLC38A7  |
| chr12:49494740-49500205   | 39  | SPATS2   |
| chr10:122132608-122143706 | 2   | TACC2    |
| chr13:75356146-75362607   | 5   | TBC1D4   |
| chr9:69225303-69226175    | 1   | TJP2     |
| chr12:26996741-26999676   | 45  | TM7SF3   |
| chr16:74942737-74956610   | 0   | WDR59    |
| chr19:33174138-33174979   | 36  | nogene   |
| chr6:18249650-18258405    | 21  | DEK      |
| chr3:150562541-150568292  | 14  | EIF2A    |
| chr6:130926604-130956499  | 17  | EPB41L2  |
| chr21:39180284-39181878   | 1   | PSMG1    |
| chr20:13528432-13580981   | 13  | TASP1    |
| chr11:6400988-6403822     | 6   | APBB1    |
| chr1:20980333-21002808    | 30  | EIF4G3   |
| chr22:43989110-43990406   | 17  | SAMM50   |
| chr7:127807483-127929329  | 15  | SND1     |
| chr12:62470700-62501698   | 24  | MON2     |
| chr10:74394140-74398579   | 170 | ADK      |
| chr11:118768222-118786518 | 21  | DDX6     |
| chr3:33014055-33046232    | 8   | GLB1     |
| chr5:109817272-109823837  | 188 | MAN2A1   |
| chr17:31252937-31265339   | 65  | NF1      |
| chr8:125151170-125195272  | 3   | NSMCE2   |
| chr10:7188623-7285954     | 1   | SFMBT2   |
| chr2:195680031-195683906  | 1   | SLC39A10 |
| chr20:13551886-13587370   | 13  | TASP1    |
| chr20:58434601-58441083   | 25  | VAPB     |



|                           |      |         |
|---------------------------|------|---------|
| chr10:75219062-75220970   | 33   | VDAC2   |
| chr6:73223698-73225421    | 7    | nogene  |
| chr12:121942533-121949061 | 58   | WDR66   |
| chr3:101671129-101672213  | 129  | ZBTB11  |
| chr16:58574608-58581515   | 1    | CNOT1   |
| chr11:9420410-9420698     | 24   | IPO7    |
| chr8:66592439-66602523    | 65   | MYBL1   |
| chr15:83151214-83164075   | 151  | HDGFRP3 |
| chrX:21978878-21992712    | 1    | SMS     |
| chr11:12675408-12764434   | 21   | TEAD1   |
| chr10:836402-864270       | 26   | LARP4B  |
| chr10:72562894-72566794   | 93   | MICU1   |
| chr11:61437624-61438113   | 1368 | SDHAF2  |
| chr16:71789278-71789482   | 1    | AP1G1   |
| chrX:1282677-1290509      | 6    | CSF2RA  |
| chr6:104833041-104849246  | 136  | HACE1   |
| chr19:5039835-5071059     | 7    | KDM4B   |
| chr5:37349171-37358151    | 23   | NUP155  |
| chr16:14586317-14604226   | 38   | PARN    |
| chr7:29966326-29969068    | 2    | SCRN1   |
| chr17:37553114-37554059   | 25   | SYNRG   |
| chr2:229836847-229880128  | 12   | TRIP12  |
| chr17:60265411-60288682   | 1    | USP32   |
| chr16:69840125-69871931   | 7    | WWP2    |
| chr19:11722953-11725327   | 27   | ZNF823  |
| chr7:106605178-106615771  | 21   | nogene  |
| chr22:28724976-28725367   | 93   | CHEK2   |
| chr21:21280577-21292241   | 11   | NCAM2   |
| chr2:213296039-213317356  | 1    | SPAG16  |
| chr8:123084161-123097441  | 17   | TBC1D31 |
| chr1:30964673-30974802    | 12   | PUM1    |
| chr21:15762890-15805258   | 26   | USP25   |
| chr12:99806403-99825389   | 53   | ANKS1B  |
| chr10:73725960-73728587   | 38   | BMS1P4  |
| chr16:70466131-70471352   | 5    | FUK     |
| chr1:28683582-28691709    | 8    | GMEB1   |
| chr13:113344862-113355481 | 15   | GRTP1   |
| chr12:112075677-112078741 | 212  | NAA25   |
| chr12:73430428-73477374   | 2    | nogene  |
| chr12:67349209-67349398   | 14   | nogene  |
| chr6:57318436-57326045    | 17   | PRIM2   |
| chr7:105465312-105470848  | 12   | PUS7    |
| chr7:105508114-105508544  | 26   | PUS7    |

|                          |     |         |
|--------------------------|-----|---------|
| chr13:26337566-26385342  | 17  | CDK8    |
| chr16:53235184-53238586  | 24  | CHD9    |
| chr3:119863418-120093593 | 8   | GSK3B   |
| chr3:104817472-104831805 | 1   | nogene  |
| chr8:70583163-70594590   | 1   | TRAM1   |
| chr1:21924381-21924983   | 41  | nogene  |
| chr2:130358866-130359646 | 7   | PTPN18  |
| chr7:105472131-105506273 | 15  | PUS7    |
| chr4:87441828-87451735   | 18  | NUDT9   |
| chr12:30673989-30674753  | 15  | IPO8    |
| chrX:148651998-148662768 | 120 | AFF2    |
| chr18:12358669-12371691  | 41  | AFG3L2  |
| chr10:84371013-84373815  | 48  | CCSER2  |
| chr3:32437954-32442013   | 43  | CMTM7   |
| chr15:64204440-64204949  | 13  | CSNK1G1 |
| chr10:68936935-68948168  | 3   | DDX50   |
| chr17:47402131-47414919  | 157 | EFCAB13 |
| chr5:163473178-163478800 | 1   | HMMR    |
| chr6:89738325-89743714   | 25  | MDN1    |
| chr9:122270863-122291840 | 36  | MRRF    |
| chr1:2171250-2171460     | 1   | nogene  |
| chr16:22429803-22430774  | 0   | nogene  |
| chr5:41840450-41853554   | 20  | OXCT1   |
| chr18:7774148-7839401    | 0   | PTPRM   |
| chr15:65877331-65877955  | 14  | RAB11A  |
| chr3:47427156-47435137   | 23  | SCAP    |
| chr1:1223243-1228946     | 25  | SDF4    |
| chrX:119629317-119653040 | 10  | 6-Sep   |
| chr1:185180390-185231708 | 0   | SWT1    |
| chr22:39426702-39428183  | 0   | TAB1    |
| chr8:142300485-142331831 | 0   | TSNARE1 |
| chr3:138209816-138223733 | 96  | ARMC8   |
| chr1:24814093-24827116   | 58  | CLIC4   |
| chr3:121872536-121874121 | 18  | EAF2    |
| chr3:81577924-81594023   | 37  | GBE1    |
| chr10:69382486-69386418  | 1   | HK1     |
| chr8:97815327-97825153   | 117 | LAPTM4B |
| chr21:32270406-32284155  | 2   | MIS18A  |
| chr4:184659339-184661903 | 8   | PRIMPOL |
| chr5:159194715-159203656 | 433 | RNF145  |
| chr12:76845708-76849470  | 10  | ZDHHC17 |
| chr7:73182076-73183298   | 13  | GTF2IP1 |
| chr9:124301935-124327445 | 81  | NEK6    |

|                           |     |           |
|---------------------------|-----|-----------|
| chr4:20280268-20280877    | 28  | nogene    |
| chr14:50153069-50158646   | 2   | SOS2      |
| chr6:42615070-42617507    | 54  | UBR2      |
| chr3:172760155-172784803  | 1   | ECT2      |
| chr11:64802683-64802884   | 47  | MAP4K2    |
| chr15:96282831-96290783   | 39  | NR2F2-AS1 |
| chr3:196241947-196248323  | 14  | PCYT1A    |
| chr17:44875933-44880644   | 13  | EFTUD2    |
| chr11:94821529-94831541   | 119 | AMOTL1    |
| chr1:243136142-243156455  | 15  | CEP170    |
| chr14:96833466-96856586   | 78  | VRK1      |
| chr20:38972558-38988917   | 2   | DHX35     |
| chr8:26581968-26583983    | 12  | DPYSL2    |
| chr11:118481714-118482495 | 12  | KMT2A     |
| chr11:29059388-29063536   | 1   | nogene    |
| chr12:111661979-111662290 | 27  | nogene    |
| chr7:67009582-67025022    | 3   | TYW1      |
| chr17:5448808-5450934     | 1   | DHX33     |
| chr12:1027747-1141787     | 1   | ERC1      |
| chr7:74689123-74691111    | 1   | GTF2I     |
| chr12:2822793-2836956     | 16  | ITFG2     |
| chr4:139703454-139704196  | 23  | MGST2     |
| chr2:203068392-203084569  | 5   | NBEAL1    |
| chr4:183153690-183154609  | 24  | nogene    |
| chr5:132217196-132218644  | 5   | P4HA2     |
| chr11:32589546-32596047   | 243 | EIF3M     |
| chr10:3158039-3160330     | 30  | PITRM1    |
| chr18:47841517-47896809   | 2   | SMAD2     |
| chr2:24135118-24147086    | 75  | FAM228B   |
| chr1:63477414-63490218    | 16  | ITGB3BP   |
| chr14:89980539-89985210   | 27  | TDP1      |
| chr16:21315883-21385932   | 0   | CRYM-AS1  |
| chr16:47641034-47669417   | 7   | PHKB      |
| chr7:67067284-67083539    | 74  | TYW1      |
| chr20:43702489-43705358   | 227 | MYBL2     |
| chr4:2625261-2626577      | 63  | FAM193A   |
| chr15:43334944-43335826   | 31  | ADAL      |
| chr3:155893517-155906263  | 61  | GMPS      |
| chrX:136820680-136848582  | 11  | nogene    |
| chr5:139614585-139614966  | 99  | UBE2D2    |
| chr11:768729-769573       | 115 | nogene    |
| chr17:42498923-42501304   | 142 | ATP6V0A1  |
| chr5:15615982-15634464    | 33  | FBXL7     |

|                           |     |                 |
|---------------------------|-----|-----------------|
| chr2:190900563-190924593  | 261 | GLS             |
| chr7:35667433-35673278    | 204 | HERPUD2         |
| chr4:128831732-128857454  | 2   | JADE1           |
| chr7:131387119-131399433  | 405 | MKLN1           |
| chr7:4797055-4797677      | 19  | nogene          |
| chr1:211260107-211289396  | 4   | RCOR3           |
| chr5:179567460-179569425  | 21  | RUFY1           |
| chr16:70565064-70569141   | 14  | SF3B3           |
| chr14:63864299-63909227   | 16  | SYNE2           |
| chrX:154769166-154770879  | 10  | DKC1            |
| chr12:87527757-87548850   | 3   | nogene          |
| chr15:67235978-67236820   | 60  | AAGAB           |
| chr1:4711899-4712699      | 47  | AJAP1           |
| chr10:32565557-32584304   | 9   | CCDC7           |
| chr5:69171269-69174409    | 23  | CCNB1           |
| chr4:168220654-168237795  | 8   | DDX60           |
| chr7:100812746-100813208  | 950 | EPHB4           |
| chr3:183276871-183295477  | 23  | MCF2L2          |
| chr10:103326533-103348999 | 16  | PCGF6           |
| chrX:150727214-150750843  | 19  | MTMR1           |
| chr12:121548876-121549638 | 3   | KDM2B           |
| chr22:24347085-24369320   | 4   | SPECC1L-ADORA2A |
| chr6:89377670-89387590    | 17  | RRAGD           |
| chr4:80420213-80583183    | 0   | C4orf22         |
| chr5:127956803-127966928  | 11  | nogene          |
| chr7:42917132-42917835    | 2   | PSMA2           |
| chr7:131437784-131445903  | 23  | MKLN1           |
| chr15:74489588-74491582   | 17  | nogene          |
| chr5:180567087-180568003  | 32  | CNOT6           |
| chr13:107664846-107693167 | 17  | nogene          |
| chr7:131429032-131445903  | 72  | MKLN1           |
| chr10:102488149-102490613 | 1   | ACTR1A          |
| chr6:129599215-129618852  | 2   | ARHGAP18        |
| chr1:180964515-181034074  | 0   | MR1             |
| chr7:96170044-96193183    | 26  | SLC25A13        |
| chr1:186406082-186425297  | 3   | C1orf27         |
| chr15:44337762-44380976   | 18  | CASC4           |
| chr16:53605480-53611051   | 18  | RPGRIP1L        |
| chr19:38700599-38701121   | 23  | ACTN4           |
| chr1:180976117-180993425  | 3   | STX6            |
| chr19:3758524-3758977     | 20  | nogene          |
| chr17:19924407-19931978   | 25  | AKAP10          |
| chr2:157760879-157766196  | 0   | ACVR1           |

|                          |      |           |
|--------------------------|------|-----------|
| chr10:4830674-4835809    | 33   | AKR1E2    |
| chr9:98745558-98771046   | 15   | ANKS6     |
| chr3:57242855-57248351   | 54   | APPL1     |
| chr1:155395458-155439068 | 12   | ASH1L     |
| chr1:1482137-1518990     | 824  | ATAD3B    |
| chr17:8206490-8207901    | 16   | AURKB     |
| chr6:26385014-26388294   | 10   | BTN2A2    |
| chr14:22987519-22999156  | 0    | C14orf93  |
| chr5:134321790-134350427 | 0    | CDKL3     |
| chr11:77622499-77625818  | 106  | CLNS1A    |
| chr15:90619740-90629532  | 3    | CRTC3     |
| chr11:61325610-61330074  | 41   | DDB1      |
| chr10:99894945-99896397  | 2    | DNMBP     |
| chr19:32973183-32973562  | 14   | FAAP24    |
| chr1:59346246-59378837   | 24   | FGGY      |
| chr1:28690103-28704329   | 3    | GMEB1     |
| chr16:50078740-50086351  | 17   | HEATR3    |
| chr11:33286412-33287511  | 4939 | HIPK3     |
| chr1:202755270-202758510 | 0    | KDM5B     |
| chr17:6589778-6635171    | 21   | KIAA0753  |
| chr9:5986135-5988545     | 2    | KIAA2026  |
| chr14:55612018-55619312  | 121  | KTN1      |
| chr1:200368664-200374254 | 0    | LINC00862 |
| chr6:118826146-118829250 | 15   | MCM9      |
| chr17:2464207-2473664    | 37   | METTL16   |
| chr22:26717252-26738240  | 2    | MIATNB    |
| chr4:153394261-153397333 | 302  | MND1      |
| chr2:42718987-42723035   | 46   | MTA3      |
| chr9:98076917-98078347   | 72   | NANS      |
| chr14:92104372-92104729  | 16   | nogene    |
| chr7:55555946-55556534   | 19   | nogene    |
| chr1:152248894-152253510 | 25   | nogene    |
| chr5:150364956-150365889 | 24   | nogene    |
| chr15:96334075-96337535  | 149  | NR2F2     |
| chr11:3731390-3753408    | 190  | NUP98     |
| chr7:44645326-44647759   | 348  | OGDH      |
| chr11:73909398-73916660  | 0    | PAAF1     |
| chr16:2577424-2583585    | 6    | PDPK1     |
| chr16:47580294-47610920  | 0    | PHKB      |
| chr3:171677565-171692442 | 0    | PLD1      |
| chr3:12312379-12392752   | 20   | PPARG     |
| chr2:20253821-20256170   | 21   | PUM2      |
| chr2:226838072-226867318 | 0    | RHBDD1    |

|                           |     |           |
|---------------------------|-----|-----------|
| chr1:213129526-213176492  | 25  | RPS6KC1   |
| chrX:19541924-19546050    | 20  | SH3KBP1   |
| chr3:47706408-47729094    | 100 | SMARCC1   |
| chr4:122935713-122979386  | 70  | SPATA5    |
| chr10:11931640-11936712   | 0   | UPF2      |
| chr17:653290-661895       | 28  | VPS53     |
| chr2:63484603-63571626    | 34  | WDPCP     |
| chr19:9341101-9343784     | 13  | ZNF559    |
| chr17:81270917-81277133   | 79  | SLC38A10  |
| chrX:72490928-72495268    | 35  | HDAC8     |
| chr9:131430089-131439061  | 17  | PRRC2B    |
| chr8:140370963-140405698  | 31  | TRAPPC9   |
| chr19:33798670-33811552   | 7   | KCTD15    |
| chr3:104522668-104556044  | 27  | nogene    |
| chr1:31028795-31059577    | 31  | PUM1      |
| chr6:135442581-135457713  | 8   | AHI1      |
| chrX:80717572-80730020    | 6   | BRWD3     |
| chr19:11111513-11116212   | 21  | LDLR      |
| chr17:31169890-31182665   | 23  | NF1       |
| chr2:95834358-95834565    | 24  | nogene    |
| chr1:44866320-44866664    | 20  | nogene    |
| chr14:73147794-73217244   | 17  | PSEN1     |
| chr4:86764592-86767976    | 100 | PTPN13    |
| chr4:53145332-53145582    | 50  | SCFD2     |
| chrX:53405011-53405391    | 31  | SMC1A     |
| chr17:64561499-64571956   | 103 | SMURF2    |
| chr14:20395449-20395949   | 39  | TEP1      |
| chr7:73459535-73466401    | 0   | BAZ1B     |
| chr21:37375050-37420384   | 0   | DYRK1A    |
| chr12:110485077-110486717 | 23  | FAM216A   |
| chr2:232735154-232749082  | 10  | GIGYF2    |
| chr4:87159457-87195690    | 0   | KLHL8     |
| chr1:93110229-93110626    | 13  | MTF2      |
| chr13:24477700-24490828   | 0   | PARP4     |
| chr10:91819269-91836998   | 1   | TNKS2     |
| chr4:1892165-1935262      | 30  | WHSC1     |
| chr2:214745066-214781509  | 36  | BARD1     |
| chr17:49716164-49732720   | 0   | FAM117A   |
| chr17:30481142-30484770   | 354 | GOSR1     |
| chr3:119863418-119876508  | 28  | GSK3B     |
| chr3:28575069-28576496    | 0   | LINC00693 |
| chr12:56712785-56714439   | 1   | NACA      |
| chr10:121959323-121963328 | 14  | NSMCE4A   |

|                           |     |              |
|---------------------------|-----|--------------|
| chr6:136825213-136846181  | 1   | PEX7         |
| chr14:73147794-73165413   | 0   | PSEN1        |
| chr1:176027571-176085890  | 2   | RFWD2        |
| chr2:218748835-218751806  | 15  | TTLL4        |
| chr17:51263273-51280479   | 5   | UTP18        |
| chr6:87210450-87233527    | 0   | ZNF292       |
| chr13:27253843-27254219   | 110 | RPL21        |
| chr1:203816925-203818689  | 63  | ZC3H11A      |
| chr3:183977516-183978651  | 21  | ABCC5        |
| chr20:49090741-49094963   | 56  | CSE1L        |
| chr2:15553425-15558634    | 63  | NBAS         |
| chr1:161102047-161102375  | 139 | PFDN2        |
| chr8:73805650-73830472    | 223 | UBE2W        |
| chr11:46769962-46788773   | 4   | CKAP5        |
| chr12:124956690-124957135 | 38  | DHX37        |
| chr2:241403827-241436538  | 7   | FARP2        |
| chr2:121730892-121732204  | 2   | NIFK         |
| chr1:77154448-77212347    | 13  | PIGK         |
| chr8:140789473-140846678  | 41  | PTK2         |
| chr17:42329409-42329776   | 13  | STAT3        |
| chr6:111570084-111576470  | 13  | TRAF3IP2-AS1 |
| chr15:50706387-50707157   | 98  | no gene      |
| chr17:37440504-37442652   | 36  | TADA2A       |
| chr20:49072285-49091022   | 0   | CSE1L        |
| chr7:157339837-157367483  | 0   | DNAJB6       |
| chr22:42619702-42628183   | 4   | no gene      |
| chr9:125213369-125220700  | 81  | RABEPK       |
| chr16:2557702-2577500     | 0   | PDPK1        |
| chr16:11020192-11126146   | 135 | CLEC16A      |
| chr9:123169901-123184298  | 82  | STRBP        |
| chr9:95897848-95921315    | 5   | ERCC6L2      |
| chr4:109491326-109500054  | 1   | SEC24B       |
| chr2:72988257-73001578    | 29  | SFXN5        |
| chr15:74917773-74929232   | 1   | COX5A        |
| chr22:38620211-38623279   | 26  | FAM227A      |
| chr18:36658074-36693423   | 83  | FHOD3        |
| chr3:52737585-52739634    | 68  | NEK4         |
| chr12:50312228-50312840   | 0   | no gene      |
| chr12:68690630-68700853   | 33  | NUP107       |
| chr15:44626330-44629388   | 31  | SPG11        |
| chr15:43455891-43470066   | 50  | TP53BP1      |
| chr9:19063007-19076704    | 14  | HAUS6        |
| chr10:3132379-3135838     | 20  | PFKP         |

|                           |     |              |
|---------------------------|-----|--------------|
| chr8:67093542-67095732    | 130 | CSPP1        |
| chr7:155763808-155766655  | 32  | RBM33        |
| chr4:42001615-42049479    | 11  | SLC30A9      |
| chr2:187496880-187503770  | 5   | TFPI         |
| chr14:95140658-95141748   | 38  | DICER1       |
| chr13:114040999-114073837 | 170 | RASA3        |
| chr16:15882948-15884205   | 1   | FOPNL        |
| chr8:43069554-43072307    | 86  | FNTA         |
| chr19:37425867-37444964   | 49  | ZNF569       |
| chr2:158533179-158634289  | 4   | PKP4         |
| chr1:16484822-16631109    | 95  | CROCCP3      |
| chr2:171046173-171050174  | 57  | TLK1         |
| chr11:66825398-66825936   | 2   | nogene       |
| chr19:32617588-32622619   | 43  | ANKRD27      |
| chr4:165085585-165103096  | 13  | TMEM192      |
| chr17:60679452-60709325   | 115 | BCAS3        |
| chr17:81667728-81672155   | 4   | CCDC137      |
| chr9:96562692-96565512    | 0   | CDC14B       |
| chr1:179043714-179054634  | 0   | FAM20B       |
| chr15:49235850-49292537   | 180 | GALK2        |
| chr12:46571255-46577284   | 0   | LOC100288798 |
| chr20:46068501-46079485   | 0   | NCOA5        |
| chr6:138473305-138496371  | 178 | NHSL1        |
| chr5:179535164-179540832  | 0   | nogene       |
| chr5:178143626-178144108  | 0   | RMND5B       |
| chr6:107881148-107883146  | 58  | SEC63        |
| chr4:188104836-188105587  | 31  | TRIML2       |
| chr4:39874288-39877153    | 20  | PDS5A        |
| chr22:42890946-42891182   | 81  | PACSIN2      |
| chr3:138755753-138759359  | 7   | PIK3CB       |
| chr8:47900372-47930787    | 24  | PRKDC        |
| chr11:62569396-62570171   | 19  | nogene       |
| chr6:7895105-7904723      | 3   | TXNDC5       |
| chr4:37631384-37635123    | 58  | RELL1        |
| chr17:80236927-80237594   | 6   | SLC26A11     |
| chr21:15864267-15874526   | 26  | USP25        |
| chr18:62539680-62544873   | 1   | ZCCHC2       |
| chr1:243613670-243843282  | 46  | AKT3         |
| chr15:50489800-50490525   | 1   | USP8         |
| chr4:150928515-150929065  | 16  | LRBA         |
| chr16:47128324-47134410   | 19  | NETO2        |
| chr3:61622462-61623555    | 56  | nogene       |
| chr5:66153462-66159334    | 28  | SREK1        |



|                           |     |          |
|---------------------------|-----|----------|
| chr3:75741275-75741736    | 38  | ZNF717   |
| chr19:36917578-36937242   | 29  | ZNF568   |
| chr15:76274411-76286481   | 37  | ETFA     |
| chr4:103048892-103057971  | 4   | SLC9B2   |
| chr10:31373017-31387798   | 152 | nogene   |
| chr22:29042494-29046883   | 1   | ZNRF3    |
| chr12:1777853-1784073     | 78  | ADIPOR2  |
| chr20:33379460-33382179   | 11  | CDK5RAP1 |
| chr5:14304460-14336727    | 312 | TRIO     |
| chrX:10924729-10925298    | 17  | nogene   |
| chr16:2365680-2379581     | 0   | ABCA17P  |
| chr8:39054480-39082721    | 0   | ADAM9    |
| chr22:40360401-40363071   | 0   | ADSL     |
| chr10:84438281-84477664   | 18  | CCSER2   |
| chr11:68807466-68812576   | 32  | CPT1A    |
| chr12:93849969-93859442   | 0   | CRADD    |
| chr9:95897848-95928864    | 72  | ERCC6L2  |
| chrX:154361978-154362332  | 21  | FLNA     |
| chr10:1000676-1007128     | 20  | GTPBP4   |
| chr9:96298415-96302311    | 0   | HSD17B3  |
| chr15:60442415-60445791   | 2   | ICE2     |
| chr19:45264683-45266281   | 5   | MARK4    |
| chr10:72551178-72566794   | 47  | MICU1    |
| chr19:17145396-17154066   | 0   | MYO9B    |
| chr2:191678989-191685855  | 0   | NABP1    |
| chr16:69626402-69655799   | 4   | NFAT5    |
| chr5:149739473-149740125  | 0   | nogene   |
| chr8:103246293-103246684  | 9   | nogene   |
| chr1:224275338-224289733  | 0   | NVL      |
| chr5:41762110-41807438    | 101 | OXCT1    |
| chr3:196782625-196803164  | 15  | PAK2     |
| chr3:111913318-111932397  | 2   | PHLDB2   |
| chr12:106842588-106851594 | 28  | RIC8B    |
| chr6:154808069-154810208  | 19  | SCAF8    |
| chr5:78415519-78418903    | 0   | SCAMP1   |
| chr2:213310058-213317356  | 26  | SPAG16   |
| chr1:47287550-47304996    | 3   | STIL     |
| chr17:63028003-63200957   | 0   | TANC2    |
| chr1:235419472-235434280  | 32  | TBCE     |
| chr17:40395448-40399131   | 31  | TOP2A    |
| chr6:123331878-123366182  | 0   | TRDN     |
| chr5:14297071-14316743    | 25  | TRIO     |
| chr15:50631416-50663046   | 54  | TRPM7    |

|                           |     |          |
|---------------------------|-----|----------|
| chr7:98929988-98930206    | 0   | TRRAP    |
| chr15:77052384-77056255   | 13  | TSPAN3   |
| chr4:102801453-102826636  | 0   | UBE2D3   |
| chr2:85619219-85625691    | 48  | USP39    |
| chr6:148964409-149074112  | 0   | UST      |
| chr3:142397328-142405076  | 16  | XRN1     |
| chr1:32627507-32634072    | 6   | ZBTB80S  |
| chrX:24179182-24179770    | 31  | ZFX      |
| chr1:245858495-245929937  | 52  | SMYD3    |
| chr11:86487336-86508867   | 13  | ME3      |
| chr17:2172657-2188515     | 6   | SMG6     |
| chr11:35176574-35190065   | 11  | CD44     |
| chr9:96360153-96368305    | 4   | SLC35D2  |
| chr1:72749165-72874338    | 4   | nogene   |
| chr12:104120399-104123423 | 89  | NFYB     |
| chr8:47927193-47930787    | 64  | PRKDC    |
| chr7:105202431-105203785  | 1   | SRPK2    |
| chr22:29520007-29525946   | 1   | THOC5    |
| chrX:110020351-110144876  | 14  | TMEM164  |
| chr12:132668810-132672322 | 55  | POLE     |
| chr1:70270855-70276844    | 3   | ANKRD13C |
| chr15:29053844-29054835   | 86  | APBA2    |
| chr2:214745066-214769312  | 80  | BARD1    |
| chr9:21324075-21329419    | 16  | nogene   |
| chr19:32371381-32371734   | 23  | nogene   |
| chrX:134413490-134417302  | 19  | PHF6     |
| chr17:1842802-1846641     | 2   | RPA1     |
| chr22:40429605-40435554   | 12  | MKL1     |
| chr15:65481514-65490299   | 1   | DPP8     |
| chr15:63696123-63716473   | 119 | HERC1    |
| chr10:75547030-75547662   | 27  | nogene   |
| chr7:127373341-127377329  | 39  | ZNF800   |
| chrX:131332206-131369052  | 33  | nogene   |
| chr8:48043032-48049978    | 83  | UBE2V2   |
| chr7:129203383-129206587  | 36  | SMO      |
| chr1:155415743-155415923  | 24  | ASH1L    |
| chr1:94458606-94475737    | 14  | ABCD3    |
| chr20:49092045-49094963   | 136 | CSE1L    |
| chr10:126970701-126998249 | 1   | DOCK1    |
| chr5:108020924-108348530  | 58  | FBXL17   |
| chr17:39297126-39343241   | 19  | FBXL20   |
| chr4:106193608-106212835  | 61  | TBCK     |
| chr9:83665029-83678599    | 7   | UBQLN1   |

|                           |     |           |
|---------------------------|-----|-----------|
| chr19:17156908-17163122   | 35  | MYO9B     |
| chr3:155893517-155903960  | 0   | GMPS      |
| chr6:83346172-83352139    | 6   | ME1       |
| chr7:30455136-30457042    | 3   | NOD1      |
| chr4:82854902-82861708    | 13  | SEC31A    |
| chr17:44435064-44464544   | 7   | GPATCH8   |
| chr21:42686191-42733426   | 15  | PDE9A     |
| chr3:172226870-172247776  | 6   | FNDC3B    |
| chr16:70128783-70129122   | 2   | PDPR      |
| chr1:246591511-246591941  | 50  | CNST      |
| chr15:28245880-28248736   | 59  | HERC2     |
| chr6:37650108-37652340    | 0   | MDGA1     |
| chr4:40978403-40986415    | 7   | nogene    |
| chr4:39837855-39842056    | 29  | PDS5A     |
| chr4:6372522-6389952      | 0   | PPP2R2C   |
| chr20:56473300-56484189   | 23  | RTFDC1    |
| chr15:45486610-45490881   | 1   | SLC30A4   |
| chr20:10556230-10560820   | 141 | SLX4IP    |
| chr1:151638887-151693483  | 26  | SNX27     |
| chr17:51005211-51007326   | 0   | SPAG9     |
| chr17:82870223-82903478   | 27  | TBCD      |
| chr20:43973366-44006792   | 31  | TOX2      |
| chr8:42398711-42399703    | 0   | VDAC3     |
| chr5:154790324-154803745  | 8   | LARP1     |
| chr1:50787999-50801677    | 137 | FAF1      |
| chr3:40461465-40462104    | 104 | nogene    |
| chr6:84305115-84313884    | 1   | nogene    |
| chrX:155468285-155509901  | 0   | nogene    |
| chr8:43122106-43122898    | 0   | POMK      |
| chr7:22976209-22991139    | 854 | FAM126A   |
| chr16:11730644-11736233   | 39  | TXNDC11   |
| chr1:16137852-16138430    | 98  | EPHA2     |
| chr2:61498672-61499894    | 41  | XPO1      |
| chr6:118479870-118483858  | 28  | CEP85L    |
| chr1:174219124-174221164  | 25  | RABGAP1L  |
| chr5:150396281-150396842  | 3   | TCOF1     |
| chr1:24169416-24180854    | 21  | IFNLR1    |
| chr10:125038996-125111093 | 265 | CTBP2     |
| chr1:35460304-35466695    | 6   | KIAA0319L |
| chr4:25345547-25351689    | 20  | ZCCHC4    |
| chr20:47246007-47249439   | 13  | ZMYND8    |
| chr10:1093451-1105267     | 64  | WDR37     |
| chr16:71667177-71681905   | 26  | PHLPP2    |

|                           |     |         |
|---------------------------|-----|---------|
| chr16:71676446-71690709   | 17  | PHLPP2  |
| chr17:15677175-15677721   | 63  | TRIM16  |
| chr2:178591117-178600667  | 17  | TTN-AS1 |
| chr13:41811224-41819386   | 153 | VWA8    |
| chr3:23900807-23901049    | 14  | NKIRAS1 |
| chr10:109891721-109915099 | 1   | XPNPEP1 |
| chr2:61339350-61350693    | 1   | USP34   |
| chr11:130120705-130122513 | 29  | APLP2   |
| chr1:1637407-1704344      | 137 | CDK11B  |
| chr7:39999360-40063100    | 12  | CDK13   |
| chr5:138781922-138904441  | 2   | CTNNA1  |
| chr6:117525361-117537225  | 12  | DCBLD1  |
| chr15:49625112-49634794   | 18  | DTWD1   |
| chr22:45330602-45340561   | 16  | FAM118A |
| chr6:5431040-5467069      | 12  | FARS2   |
| chr5:171868609-171878129  | 0   | FBXW11  |
| chr15:65558679-65564342   | 12  | HACD3   |
| chrX:118741016-118761289  | 2   | IL13RA1 |
| chr14:103662115-103662927 | 101 | KLC1    |
| chr22:33761370-33771008   | 12  | LARGE   |
| chr3:197865422-197871462  | 11  | LRCH3   |
| chr17:45273502-45274593   | 27  | MAP3K14 |
| chr9:122280442-122322745  | 32  | MRRF    |
| chr12:65326825-65369026   | 48  | MSRB3   |
| chr5:6775558-6777509      | 6   | nogene  |
| chr19:57861351-57863260   | 12  | nogene  |
| chr5:178224641-178230099  | 12  | PHYKPL  |
| chr14:39180502-39183830   | 4   | PNN     |
| chr8:140846259-140921132  | 13  | PTK2    |
| chr6:130287819-130313093  | 3   | SAMD3   |
| chr13:98474820-98519473   | 40  | STK24   |
| chr18:31846715-31852663   | 43  | TRAPPC8 |
| chr6:25963048-25964954    | 12  | TRIM38  |
| chr19:34430575-34433412   | 20  | UBA2    |
| chr10:73575511-73576361   | 26  | USP54   |
| chr11:75851882-75912039   | 6   | UVRAG   |
| chr18:12999420-13008631   | 108 | CEP192  |
| chr15:22943172-22947291   | 12  | CYFIP1  |
| chr10:96949007-96952196   | 19  | LCOR    |
| chr15:75407054-75422823   | 23  | SIN3A   |
| chr12:6933839-6934578     | 1   | ATN1    |
| chr17:40260534-40262641   | 28  | WIPF2   |
| chr21:45116932-45128573   | 17  | ADARB1  |

|                           |     |              |
|---------------------------|-----|--------------|
| chr18:9195550-9216900     | 0   | ANKRD12      |
| chr4:40881283-40893411    | 7   | APBB2        |
| chr16:67452237-67453715   | 0   | ATP6V0D1     |
| chr7:90917600-90984241    | 0   | CDK14        |
| chr17:63578469-63585328   | 4   | DCAF7        |
| chr1:153937487-153937863  | 46  | DENND4B      |
| chr12:31413435-31433248   | 5   | DENND5B      |
| chr1:68494429-68494695    | 7   | DEPDC1       |
| chr2:85356966-85357252    | 2   | ELMOD3       |
| chr10:119107967-119132609 | 0   | FAM45A       |
| chr14:45118027-45130790   | 109 | FKBP3        |
| chr1:240123178-240158307  | 0   | FMN2         |
| chr7:42076751-42223295    | 1   | GLI3         |
| chr4:157136468-157153010  | 48  | GLRB         |
| chr17:30481142-30510909   | 92  | GOSR1        |
| chr2:144208602-144211579  | 97  | GTDC1        |
| chr4:142654586-142725901  | 1   | INPP4B       |
| chr1:156550260-156552095  | 0   | IQGAP3       |
| chr11:108479300-108491167 | 12  | KDELC2       |
| chr10:124488421-124498128 | 55  | LHPP         |
| chr8:89724628-89724966    | 0   | LOC101929709 |
| chr2:43912431-43934878    | 52  | LRPPRC       |
| chr2:39290291-39309519    | 0   | MAP4K3       |
| chr18:2552694-2555038     | 0   | METTL4       |
| chr14:37285317-37369624   | 188 | MIPOL1       |
| chr7:131387119-131388972  | 0   | MKLN1        |
| chr9:14146688-14155893    | 28  | NFIB         |
| chr3:106741560-106771161  | 17  | nogene       |
| chr1:235267826-235268638  | 0   | nogene       |
| chr11:65503116-65503931   | 2   | nogene       |
| chr17:81606690-81610258   | 0   | NPLOC4       |
| chr1:151227319-151232703  | 20  | PIP5K1A      |
| chr10:78002196-78007866   | 57  | POLR3A       |
| chr14:50915335-50917105   | 5   | PYGL         |
| chr1:178123047-178300118  | 4   | RASAL2       |
| chr3:49967469-49975392    | 226 | RBM6         |
| chr1:202001375-202003461  | 29  | RNPEP        |
| chr1:243270091-243308177  | 14  | SDCCAG8      |
| chr4:109527321-109531522  | 0   | SEC24B       |
| chr17:64593439-64606640   | 2   | SMURF2       |
| chr9:4622407-4635399      | 1   | SPATA6L      |
| chr3:136602078-136604473  | 0   | STAG1        |
| chr9:123158331-123184298  | 19  | STRBP        |

|                           |     |                 |
|---------------------------|-----|-----------------|
| chr4:106260436-106308989  | 17  | TBCK            |
| chr10:68651845-68652594   | 0   | TET1            |
| chr8:140275657-140360193  | 1   | TRAPPC9         |
| chr1:1255233-1267992      | 0   | UBE2J2          |
| chr14:88563650-88575940   | 0   | ZC3H14          |
| chr19:57722315-57723340   | 0   | ZNF671          |
| chr10:124971964-124974398 | 0   | ZRANB1          |
| chr8:143689203-143690123  | 14  | ZNF707          |
| chr2:202530793-202552888  | 12  | BMPR2           |
| chr12:122572936-122574380 | 1   | KNTC1           |
| chr17:76564508-76564833   | 14  | nogene          |
| chr2:10373605-10374580    | 1   | nogene          |
| chr3:125288102-125331238  | 74  | ZNF148          |
| chr10:112890965-112906213 | 2   | nogene          |
| chr4:88043232-88043457    | 13  | PKD2            |
| chr18:54271359-54284065   | 3   | POLI            |
| chr8:127939507-128010444  | 35  | PVT1            |
| chr5:61490785-61494410    | 5   | ZSWIM6          |
| chr7:73183114-73184719    | 7   | GTF2IP1         |
| chr5:140482579-140487060  | 13  | ANKHD1-EIF4EBP3 |
| chr9:36198978-36204179    | 2   | CLTA            |
| chr11:70405264-70407591   | 132 | CTTN            |
| chr15:52593577-52601165   | 2   | FAM214A         |
| chr10:7258090-7285954     | 19  | SFMBT2          |
| chr9:38544753-38545193    | 53  | nogene          |
| chr6:157036834-157133207  | 1   | ARID1B          |
| chr17:15545784-15555364   | 92  | TVP23C-CDRT4    |
| chr11:61326778-61330074   | 13  | DDB1            |
| chr14:61720381-61721823   | 68  | HIF1A           |
| chr10:28535561-28590832   | 19  | WAC             |
| chr3:72792915-72817384    | 14  | SHQ1            |
| chr15:76857808-76883876   | 136 | SCAPER          |
| chr15:51862810-51869373   | 16  | TMOD3           |
| chr13:24490667-24501834   | 12  | PARP4           |
| chr1:220006105-220007338  | 25  | EPRS            |
| chr17:12095574-12113360   | 116 | MAP2K4          |
| chr7:6735304-6741852      | 19  | PMS2CL          |
| chrX:131749305-131768696  | 28  | FIRRE           |
| chr3:136422409-136423044  | 1   | STAG1           |
| chr1:112996840-112999109  | 28  | nogene          |
| chr5:65170616-65197151    | 330 | ADAMTS6         |
| chr8:99878139-99887618    | 20  | COX6C           |
| chr6:150877633-150887981  | 40  | MTHFD1L         |

|                           |     |           |
|---------------------------|-----|-----------|
| chr7:66742130-66743522    | 40  | nogene    |
| chr3:51541588-51590559    | 20  | RAD54L2   |
| chr4:37902002-37929982    | 27  | TBC1D1    |
| chr2:65239851-65251099    | 0   | ACTR2     |
| chr10:100990435-100991010 | 13  | C10orf2   |
| chr11:34079627-34086413   | 10  | CAPRIN1   |
| chr1:92725597-92736627    | 100 | EVI5      |
| chr18:57554259-57554952   | 21  | FECH      |
| chr6:35619095-35684485    | 1   | FKBP5     |
| chr9:96949554-96962963    | 9   | HIATL2    |
| chr12:50427764-50430570   | 32  | LARP4     |
| chr8:120488158-120502609  | 0   | MTBP      |
| chr12:77994802-78007445   | 5   | NAV3      |
| chr3:104630288-104630579  | 9   | nogene    |
| chr4:39848850-39849652    | 3   | PDS5A     |
| chr8:47783741-47798397    | 23  | PRKDC     |
| chr9:107300140-107318879  | 62  | RAD23B    |
| chrX:20188496-20204103    | 0   | RPS6KA3   |
| chr16:68266592-68275249   | 476 | SLC7A6    |
| chr4:98105952-98134459    | 62  | STPG2     |
| chr13:60439687-60460540   | 97  | TDRD3     |
| chr11:75961443-76016980   | 2   | UVRAG     |
| chr3:184982565-184999861  | 30  | VPS8      |
| chr7:158911549-158918869  | 55  | WDR60     |
| chr7:30362376-30366295    | 0   | ZNRF2     |
| chr1:77631834-77641655    | 31  | ZZZ3      |
| chr3:57633264-57634769    | 0   | DENND6A   |
| chr9:96551795-96565483    | 128 | CDC14B    |
| chr6:30670409-30671274    | 19  | DHX16     |
| chr7:32620403-32679130    | 25  | DPY19L1P1 |
| chr1:235791698-235793612  | 19  | LYST      |
| chr8:6477593-6499929      | 16  | MCPH1     |
| chr7:22291174-22340886    | 12  | RAPGEF5   |
| chr18:51054780-51067187   | 56  | SMAD4     |
| chrX:130236213-130247005  | 32  | ZNF280C   |
| chr1:112591524-112600848  | 2   | ST7L      |
| chr8:25243673-25278665    | 9   | DOCK5     |
| chr3:43574808-43577261    | 13  | ANO10     |
| chr13:28197184-28261458   | 1   | PAN3      |
| chr7:17814833-17830047    | 3   | SNX13     |
| chr17:16001914-16006568   | 98  | TTC19     |
| chr19:34678736-34683238   | 27  | ZNF302    |
| chr4:105233896-105237351  | 4   | TET2      |

|                           |     |           |
|---------------------------|-----|-----------|
| chr5:74813839-74841679    | 598 | FAM169A   |
| chr5:65451474-65452918    | 129 | ADAMTS6   |
| chr9:85642826-85712566    | 30  | AGTPBP1   |
| chr4:47535901-47546862    | 0   | ATP10D    |
| chr5:135074416-135174172  | 15  | C5orf66   |
| chr6:30649557-30651466    | 10  | C6orf136  |
| chr18:68836748-68846421   | 4   | CCDC102B  |
| chr1:156317165-156334918  | 1   | CCT3      |
| chr3:113409105-113416627  | 0   | CFAP44    |
| chr16:57119194-57123473   | 1   | CPNE2     |
| chr10:94938436-94942020   | 0   | CYP2C9    |
| chr9:123667025-123769563  | 8   | DENND1A   |
| chr19:10173089-10177367   | 23  | DNMT1     |
| chr7:32655986-32679130    | 19  | DPY19L1P1 |
| chr5:31464235-31526290    | 0   | DROSHA    |
| chr16:68038005-68056424   | 14  | DUS2      |
| chr6:170388286-170391121  | 2   | FAM120B   |
| chrX:154512313-154512936  | 23  | FAM3A     |
| chr7:102822039-102854860  | 11  | FBXL13    |
| chr10:121564501-121565704 | 13  | FGFR2     |
| chrX:154441622-154441794  | 0   | GDI1      |
| chr9:130104419-130110426  | 12  | GPR107    |
| chrX:307359-307880        | 2   | GTPBP6    |
| chr6:82181878-82204958    | 2   | IBTK      |
| chr4:142108092-142124760  | 27  | INPP4B    |
| chr17:27550567-27558187   | 15  | KSR1      |
| chr20:14002287-14009973   | 24  | MACROD2   |
| chr1:113646485-113659265  | 18  | MAGI3     |
| chr2:171337452-171339554  | 183 | METTL8    |
| chr9:126392065-126395697  | 37  | MVB12B    |
| chr12:78127166-78146392   | 0   | NAV3      |
| chr4:177353307-177353728  | 339 | NEIL3     |
| chr1:169298555-169324500  | 38  | NME7      |
| chr12:69459516-69462525   | 31  | nogene    |
| chr2:218249362-218253965  | 2   | nogene    |
| chr18:12375056-12375577   | 21  | nogene    |
| chr21:45755416-45760441   | 1   | nogene    |
| chr8:127969415-128010444  | 20  | nogene    |
| chr17:61353587-61354502   | 0   | nogene    |
| chr5:97429848-97439618    | 0   | nogene    |
| chr16:14608280-14617650   | 1   | PARN      |
| chr10:94258781-94259150   | 0   | PLCE1     |
| chr17:28350437-28351800   | 35  | POLDIP2   |



|                           |     |             |
|---------------------------|-----|-------------|
| chr3:121496807-121498670  | 172 | POLQ        |
| chr10:102137849-102138980 | 0   | PPRC1       |
| chr10:87931045-87933251   | 3   | PTEN        |
| chr19:40780018-40786978   | 1   | RAB4B-EGLN2 |
| chr9:127195090-127199066  | 17  | RALGPS1     |
| chr13:114037750-114073837 | 0   | RASA3       |
| chr20:35653797-35659014   | 29  | RBM12       |
| chr20:35721739-35725155   | 436 | RBM39       |
| chr15:59030803-59058550   | 25  | RNF111      |
| chr2:7014453-7030215      | 3   | RNF144A     |
| chr5:139026800-139127853  | 0   | SIL1        |
| chrX:119410189-119410362  | 3   | SLC25A43    |
| chr3:27437387-27448797    | 107 | SLC4A7      |
| chrX:21966982-21967316    | 0   | SMS         |
| chr12:108818248-108818558 | 5   | SSH1        |
| chr12:15894046-15903143   | 0   | STRAP       |
| chr13:37012191-37024442   | 0   | SUPT20H     |
| chr8:123105287-123109620  | 8   | TBC1D31     |
| chr4:165100627-165103096  | 11  | TMEM192     |
| chr2:3387619-3424663      | 3   | TRAPPC12    |
| chr10:73536268-73539593   | 24  | USP54       |
| chr1:45087880-45088237    | 42  | ZSWIM5      |
| chr7:107230614-107258383  | 9   | COG5        |
| chr4:44293403-44369094    | 18  | nogene      |
| chr14:54681934-54702580   | 69  | SAMD4A      |
| chr5:43381800-43382052    | 4   | CCL28       |
| chr10:127061667-127110354 | 39  | DOCK1       |
| chr10:70419913-70421966   | 33  | EIF4EBP2    |
| chr6:130885095-130908863  | 21  | EPB41L2     |
| chr2:24135118-24139450    | 90  | FAM228B     |
| chrX:152284667-152364596  | 4   | GABRA3      |
| chr5:62530708-62561257    | 15  | IPO11       |
| chr15:90481959-90482281   | 12  | IQGAP1      |
| chr3:124809021-124812920  | 12  | ITGB5       |
| chr6:17836877-17837583    | 3   | KIF13A      |
| chr19:18564868-18565190   | 64  | KXD1        |
| chr4:128074459-128098330  | 46  | LARP1B      |
| chr11:68386315-68390052   | 25  | LRP5        |
| chr2:15327749-15330765    | 40  | NBAS        |
| chr8:95041569-95048558    | 12  | NDUFAF6     |
| chr11:65502320-65503931   | 11  | nogene      |
| chr3:15303560-15304233    | 12  | nogene      |
| chr11:46428750-46429066   | 53  | nogene      |

|                           |     |                |
|---------------------------|-----|----------------|
| chr7:65313569-65317566    | 13  | nogene         |
| chr7:135577795-135593192  | 131 | NUP205         |
| chr7:5997325-6002636      | 16  | PMS2           |
| chrX:24809897-24843677    | 61  | POLA1          |
| chr8:140800458-140864399  | 55  | PTK2           |
| chr6:43026036-43029190    | 16  | RRP36          |
| chr20:18510821-18512282   | 46  | SEC23B         |
| chr15:49027364-49028682   | 8   | SECISBP2L      |
| chr4:146488065-146510049  | 19  | SLC10A7        |
| chrX:46620976-46653713    | 3   | SLC9A7         |
| chr18:26032398-26057742   | 16  | SS18           |
| chr8:98547968-98596169    | 3   | STK3           |
| chr2:36893897-36925208    | 12  | STRN           |
| chr1:235438768-235442911  | 18  | TBCE           |
| chr11:69078481-69079020   | 12  | TPCN2          |
| chr12:72562164-72575542   | 16  | TRHDE          |
| chr1:62447340-62448666    | 1   | USP1           |
| chr3:49305714-49311654    | 29  | USP4           |
| chr6:144451369-144459354  | 24  | UTRN           |
| chr19:45517662-45518094   | 94  | VASP           |
| chr1:35104294-35110447    | 39  | ZMYM1          |
| chr2:127869453-127871359  | 6   | AMMECR1L       |
| chr9:32984630-32989895    | 1   | APTX           |
| chr10:125827557-125831607 | 4   | BCCIP          |
| chr14:80862756-80907493   | 1   | CEP128         |
| chr14:53072596-53103856   | 3   | DDHD1          |
| chr1:28027788-28048426    | 1   | EYA3           |
| chr3:192727180-192728554  | 16  | FGF12          |
| chrX:131743095-131749458  | 42  | FIRRE          |
| chr4:165218024-165228913  | 5   | KLHL2          |
| chr9:36580072-36589652    | 16  | MELK           |
| chr14:37285317-37422949   | 27  | MIPOL1         |
| chr3:138707158-138712304  | 1   | PIK3CB         |
| chr2:55640626-55644720    | 57  | PNPT1          |
| chr7:128310779-128315020  | 17  | RBM28          |
| chr4:6923372-7014557      | 18  | TBC1D14        |
| chr20:50127974-50143621   | 1   | TMEM189-UBE2V1 |
| chr7:5320317-5325248      | 1   | TNRC18         |
| chr17:4296716-4303745     | 38  | UBE2G1         |
| chr12:42199135-42210619   | 15  | YAF2           |
| chr10:124962286-124966781 | 1   | ZRANB1         |
| chr7:92294888-92352642    | 73  | ANKIB1         |
| chr12:62349220-62355475   | 26  | USP15          |

|                           |      |              |
|---------------------------|------|--------------|
| chr12:31697360-31709425   | 4    | AMN1         |
| chr3:141903619-141922063  | 5    | ATP1B3       |
| chr2:70175672-70181997    | 11   | C2orf42      |
| chr17:59660390-59661643   | 1    | CLTC         |
| chr11:108046269-108054955 | 24   | CUL5         |
| chr2:171925536-171979363  | 37   | HAT1         |
| chr15:72345445-72348134   | 0    | HEXA         |
| chr18:46946056-46946923   | 10   | KATNAL2      |
| chr21:28162191-28170143   | 0    | LOC101927973 |
| chr7:67356030-67362278    | 0    | nogene       |
| chr11:66216118-66217617   | 0    | PACS1        |
| chr18:54271359-54292038   | 13   | POLI         |
| chr7:860127-872562        | 0    | SUN1         |
| chr21:28577218-28626676   | 35   | nogene       |
| chr2:10122982-10127220    | 17   | RRM2         |
| chr7:32639273-32679130    | 13   | DPY19L1P1    |
| chr11:93117646-93166016   | 1    | SLC36A4      |
| chr2:36396613-36431221    | 18   | CRIM1        |
| chr3:52687501-52690704    | 21   | GNL3         |
| chr17:8253858-8254301     | 33   | PFAS         |
| chr19:47150201-47169923   | 4    | SAE1         |
| chr9:123757702-123879021  | 342  | DENND1A      |
| chr7:17845594-17868490    | 39   | SNX13        |
| chr2:61873001-61876234    | 19   | CCT4         |
| chr11:111754498-111755450 | 16   | PPP2R1B      |
| chr16:88004294-88006265   | 10   | BANP         |
| chr12:30661140-30663654   | 26   | IPO8         |
| chr3:15411244-15415942    | 36   | METTL6       |
| chr16:50216074-50217663   | 9    | PAPD5        |
| chr17:58694930-58709990   | 4    | RAD51C       |
| chr2:30942200-30945870    | 14   | GALNT14      |
| chr15:58912562-58916999   | 1863 | SLTM         |
| chr2:187484123-187503770  | 23   | TFPI         |
| chr13:95986332-95996135   | 21   | UGGT2        |
| chr15:61908991-61912004   | 17   | VPS13C       |
| chr16:31122021-31122604   | 43   | nogene       |
| chr1:26942659-26943065    | 554  | NUDC         |
| chr10:92326834-92340803   | 1    | 5-Mar        |
| chr17:47668185-47670832   | 1    | KPNB1        |
| chr3:33836043-33838327    | 7    | PDCD6IP      |
| chr11:8965903-8968041     | 89   | TMEM9B-AS1   |
| chr1:37889556-37891454    | 1    | INPP5B       |
| chr16:21617864-21618074   | 12   | METTL9       |

|                           |     |              |
|---------------------------|-----|--------------|
| chr15:64203081-64300723   | 1   | CSNK1G1      |
| chr4:47855058-47875293    | 8   | NFXL1        |
| chr20:2986764-2988474     | 131 | PTPRA        |
| chr3:196072002-196077122  | 36  | TFRC         |
| chr5:33576053-33596060    | 6   | ADAMTS12     |
| chr1:156951572-156955799  | 14  | ARHGEF11     |
| chr14:80895717-80916562   | 13  | CEP128       |
| chr11:93729869-93730148   | 7   | CEP295       |
| chr10:127012294-127061776 | 16  | DOCK1        |
| chr10:80420465-80427496   | 1   | FAM213A      |
| chr19:4354948-4355173     | 34  | MPND         |
| chr3:27256295-27287743    | 1   | NEK10        |
| chr9:133976429-133978130  | 16  | nogene       |
| chr19:37729903-37730337   | 47  | nogene       |
| chr10:34450316-34517159   | 38  | PARD3        |
| chr11:85981128-85983973   | 24  | PICALM       |
| chr18:9577063-9595102     | 32  | PPP4R1       |
| chr5:168493893-168502105  | 46  | RARS         |
| chr18:36030807-36033837   | 1   | RPRD1A       |
| chr20:49864727-49884066   | 2   | SLC9A8       |
| chr7:127807483-127888012  | 47  | SND1         |
| chr4:133075343-133096883  | 2   | LOC101927359 |
| chr14:64442053-64448317   | 47  | MTHFD1       |
| chr3:52204692-52206751    | 52  | ALAS1        |
| chr1:236168705-236183906  | 166 | GPR137B      |
| chr2:233388256-233398449  | 57  | DGKD         |
| chr21:15011169-15014466   | 63  | NRIP1        |
| chr11:77675035-77693611   | 37  | RSF1         |
| chr14:66965190-67058786   | 73  | GPHN         |
| chr14:21211405-21213117   | 3   | HNRNPC       |
| chr2:55643157-55645432    | 16  | PNPT1        |
| chr17:61904459-61919513   | 13  | INTS2        |
| chr11:17336959-17337534   | 4   | nogene       |
| chr1:1403036-1403338      | 16  | nogene       |
| chr2:36396613-36479694    | 201 | CRIM1        |
| chr17:59570517-59573235   | 5   | DHX40        |
| chr6:45491940-45512407    | 51  | RUNX2        |
| chr6:12015525-12020418    | 16  | HIVEP1       |
| chr3:136452032-136502779  | 0   | STAG1        |
| chr17:1354210-1362008     | 162 | YWHAE        |
| chr17:17214984-17219209   | 21  | FLCN         |
| chr20:417525-417930       | 5   | RBCK1        |
| chr1:32037834-32039573    | 8   | KHDRBS1      |

|                           |     |              |
|---------------------------|-----|--------------|
| chr22:21799011-21807846   | 118 | MAPK1        |
| chr7:102397619-102407498  | 40  | LOC100630923 |
| chr17:58216087-58216736   | 25  | MKS1         |
| chr3:47037665-47062346    | 8   | SETD2        |
| chr3:129867009-129880559  | 31  | TMCC1        |
| chr2:37003541-37007304    | 23  | HEATR5B      |
| chr21:42850040-42876767   | 90  | WDR4         |
| chr7:11028680-11111467    | 1   | PHF14        |
| chr10:68394327-68401737   | 20  | RUFY2        |
| chr7:66944975-66945261    | 9   | TMEM248      |
| chr6:36072872-36102649    | 27  | MAPK14       |
| chr8:61618977-61638363    | 25  | ASPH         |
| chr5:148548667-148550262  | 325 | HTR4         |
| chr9:122280442-122313386  | 33  | MRRF         |
| chr19:726137-734194       | 25  | PALM         |
| chr4:88038250-88052158    | 16  | PKD2         |
| chr6:147353322-147364166  | 10  | STXBP5       |
| chr7:1936686-2002121      | 80  | MAD1L1       |
| chr6:35867733-35868082    | 19  | nogene       |
| chr20:21326489-21330539   | 54  | XRN2         |
| chr19:34194477-34209051   | 32  | LSM14A       |
| chr9:133019737-133020418  | 122 | nogene       |
| chr9:35663321-35664492    | 0   | ARHGEF39     |
| chr19:15271321-15273133   | 15  | BRD4         |
| chr11:46801199-46809874   | 21  | CKAP5        |
| chr2:36441257-36442735    | 948 | CRIM1        |
| chr9:125341176-125346941  | 77  | GAPVD1       |
| chr6:17825767-17837583    | 0   | KIF13A       |
| chr4:128178430-128179512  | 0   | LARP1B       |
| chr2:159743060-159752571  | 0   | 7-Mar        |
| chr12:120356901-120359053 | 0   | MS11         |
| chr5:41749526-41794078    | 0   | OXCT1        |
| chr11:74203727-74239256   | 2   | PPME1        |
| chr22:40792524-40799083   | 0   | SLC25A17     |
| chr13:95983803-95999307   | 115 | UGGT2        |
| chr2:216141185-216162048  | 49  | XRCC5        |
| chr11:120406117-120424415 | 13  | ARHGEF12     |
| chr1:225231072-225240822  | 1   | DNAH14       |
| chr12:131981488-131982478 | 16  | EP400        |
| chr1:89686469-89712935    | 25  | LRRC8C       |
| chr8:47803305-47819510    | 1   | PRKDC        |
| chr2:208271510-208277708  | 2   | PIKFYVE      |
| chr1:160895644-160895878  | 153 | nogene       |

|                           |     |            |
|---------------------------|-----|------------|
| chr5:93958776-93964523    | 8   | FAM172A    |
| chr2:99429839-99435941    | 77  | REV1       |
| chr13:41865735-41869189   | 2   | VWA8       |
| chr3:170113359-170122744  | 76  | PHC3       |
| chr3:47686048-47693300    | 50  | SMARCC1    |
| chr20:25632157-25674007   | 3   | ZNF337-AS1 |
| chr4:55470716-55510065    | 42  | CLOCK      |
| chr6:53514203-53522527    | 2   | GCLC       |
| chr16:5079747-5081056     | 18  | ALG1       |
| chr10:97656284-97662968   | 16  | PI4K2A     |
| chr10:116906626-116921516 | 3   | SHTN1      |
| chr16:28146093-28156527   | 63  | XPO6       |
| chr20:49269941-49271750   | 46  | ZNFX1      |
| chr16:47497398-47503090   | 18  | PHKB       |
| chr8:97668194-97668649    | 35  | nogene     |
| chr11:103255414-103286386 | 14  | DYNC2H1    |
| chr19:10368054-10368418   | 9   | TYK2       |
| chr15:78513083-78515107   | 3   | HYKK       |
| chr15:63553714-63563008   | 184 | USP3       |
| chr6:18215006-18217885    | 77  | KDM1B      |
| chr3:64010877-64022523    | 13  | PSMD6      |
| chr22:24119366-24134415   | 2   | CABIN1     |
| chr3:3140509-3144710      | 43  | TRNT1      |
| chr2:214780559-214792445  | 12  | BARD1      |
| chr7:66795510-66799414    | 74  | RABGEF1    |
| chr4:38986335-38993998    | 53  | TMEM156    |
| chr10:89751345-89762835   | 47  | KIF20B     |
| chr12:71769799-71782658   | 13  | RAB21      |
| chr4:153270337-153276130  | 11  | TRIM2      |
| chr2:219792376-219940777  | 1   | nogene     |
| chr20:44305803-44305973   | 50  | nogene     |
| chr10:7370280-7381949     | 18  | SFMBT2     |
| chr2:111850775-111858401  | 23  | ANAPC1     |
| chr11:65897995-65898726   | 12  | nogene     |
| chr15:75876186-75883424   | 65  | UBE2Q2     |
| chr21:33718796-33722651   | 18  | ITSN1      |
| chr7:5528575-5529202      | 12  | nogene     |
| chr4:7006631-7014557      | 47  | TBC1D14    |
| chr22:44913821-44920490   | 18  | PHF21B     |
| chr20:38066080-38066256   | 1   | RPRD1B     |
| chr14:30670255-30700258   | 23  | SCFD1      |
| chr4:83588209-83594960    | 1   | GPAT3      |
| chr9:92640709-92652639    | 20  | IPPK       |

|                           |     |           |
|---------------------------|-----|-----------|
| chr14:46920011-47035304   | 20  | MDGA2     |
| chr3:196069454-196071498  | 6   | TFRC      |
| chr10:72128081-72152988   | 15  | ASCC1     |
| chr19:49599271-49599938   | 2   | PRR12     |
| chr7:74674094-74674345    | 15  | nogene    |
| chr22:50409074-50409471   | 33  | nogene    |
| chr8:47933019-47954446    | 16  | PRKDC     |
| chr6:38256408-38288461    | 8   | BTBD9     |
| chr3:138077498-138084253  | 3   | DZIP1L    |
| chr8:125059221-125063651  | 1   | KIAA0196  |
| chr5:150374616-150375554  | 24  | TCOF1     |
| chr21:36247516-36251284   | 41  | DOPEY2    |
| chr10:63380317-63409988   | 25  | JMJD1C    |
| chr2:36369107-36464655    | 1   | CRIM1     |
| chr20:63928334-63931022   | 519 | DNAJC5    |
| chr16:1809237-1823037     | 20  | HAGH      |
| chr19:57455652-57456182   | 16  | nogene    |
| chr9:81590804-81593274    | 20  | TLE1      |
| chr8:94867275-94876147    | 24  | INTS8     |
| chr2:99442316-99464985    | 33  | REV1      |
| chr5:110742046-110756759  | 8   | SLC25A46  |
| chr5:78509783-78510398    | 147 | LHFPL2    |
| chr6:149676259-149680457  | 15  | LATS1     |
| chr1:36004340-36014048    | 33  | AGO3      |
| chr13:102816427-102822159 | 17  | BIVM      |
| chr14:68904654-68912242   | 18  | ACTN1     |
| chr5:65242103-65273447    | 102 | ADAMTS6   |
| chr20:21326278-21357792   | 24  | XRN2      |
| chr20:6473538-6477363     | 1   | CASC20    |
| chr5:57230845-57231321    | 55  | GPBP1     |
| chr17:30607551-30610942   | 40  | LRRC37BP1 |
| chr1:5927648-5961949      | 2   | NPHP4     |
| chr14:29632868-29634541   | 2   | PRKD1     |
| chr1:168239130-168243069  | 1   | SFT2D2    |
| chr8:70583163-70600082    | 2   | TRAM1     |
| chr3:47994423-47998879    | 18  | MAP4      |
| chr17:80289658-80291827   | 3   | RNF213    |
| chr1:114461053-114464388  | 3   | TRIM33    |
| chr4:83045625-83049984    | 1   | COPS4     |
| chr16:4332214-4335393     | 30  | GLIS2     |
| chr6:151034492-151037117  | 16  | MTHFD1L   |
| chr7:33357854-33388144    | 57  | BBS9      |
| chr7:6037423-6039014      | 12  | EIF2AK1   |

|                           |     |           |
|---------------------------|-----|-----------|
| chr9:33060464-33073806    | 12  | SMU1      |
| chr8:99096311-99193057    | 23  | VPS13B    |
| chr10:91425280-91462184   | 174 | HECTD2    |
| chr20:35366556-35384133   | 344 | UQCC1     |
| chr17:4235771-4242448     | 31  | ANKFY1    |
| chr5:55968275-55969855    | 13  | IL6ST     |
| chr1:40189054-40222710    | 25  | RLF       |
| chr6:31410029-31505098    | 62  | nogene    |
| chr15:34932317-34942080   | 18  | AQR       |
| chr11:12208022-12259897   | 1   | MICAL2    |
| chrX:109659353-109683375  | 2   | ACSL4     |
| chr17:1436789-1437155     | 40  | CRK       |
| chr9:105464235-105484502  | 17  | FSD1L     |
| chr1:100043072-100061949  | 16  | HIAT1     |
| chr7:67049948-67083539    | 1   | TYW1      |
| chr14:58215204-58223856   | 2   | ACTR10    |
| chr1:51402434-51408332    | 104 | EPS15     |
| chr6:117566853-117575352  | 4   | GOPC      |
| chr4:142305457-142405324  | 12  | INPP4B    |
| chr15:49027364-49037769   | 26  | SECISBP2L |
| chr14:50148284-50150230   | 13  | SOS2      |
| chr12:104326346-104334332 | 15  | TXNRD1    |
| chr8:102834188-102836541  | 12  | AZIN1     |
| chr12:123639263-123652735 | 80  | GTF2H3    |
| chrX:19407187-19426343    | 18  | MAP3K15   |
| chr18:20990616-20990870   | 2   | nogene    |
| chr5:73749836-73795391    | 11  | ARHGEF28  |
| chr3:197974376-197980504  | 12  | LMLN      |
| chr1:156743123-156743420  | 28  | nogene    |
| chr20:47262287-47287284   | 1   | ZMYND8    |
| chr5:14290715-14304592    | 342 | TRIO      |
| chr7:2364371-2364529      | 13  | EIF3B     |
| chr1:20969473-21050994    | 37  | EIF4G3    |
| chr19:33021570-33044364   | 2   | RHPN2     |
| chr10:91819269-91822362   | 1   | TNKS2     |
| chr12:110395100-110396452 | 5   | ANAPC7    |
| chr8:99013759-99275254    | 13  | VPS13B    |
| chr7:35638349-35670328    | 2   | HERPUD2   |
| chr5:138018301-138019146  | 9   | FAM13B    |
| chr11:47835650-47837623   | 35  | NUP160    |
| chr14:49831298-49834449   | 3   | NEMF      |
| chr5:33588598-33596060    | 3   | ADAMTS12  |
| chr2:121601567-121601922  | 32  | nogene    |



|                           |     |            |
|---------------------------|-----|------------|
| chr9:125055875-125066058  | 14  | SCAI       |
| chr16:2317787-2319580     | 0   | ABCA3      |
| chr2:203402575-203417081  | 35  | ABI2       |
| chr17:1083519-1100735     | 10  | ABR        |
| chr17:19931804-19936430   | 2   | AKAP10     |
| chr11:46493607-46548500   | 7   | AMBRA1     |
| chr17:4183397-4185046     | 13  | ANKFY1     |
| chr4:73118687-73125312    | 85  | ANKRD17    |
| chr18:14183651-14191917   | 0   | ANKRD20A5P |
| chr15:50968262-50984145   | 0   | AP4E1      |
| chr15:34860041-34867609   | 20  | AQR        |
| chr4:147909731-147955374  | 21  | ARHGAP10   |
| chr6:129583987-129605959  | 0   | ARHGAP18   |
| chr12:101396398-101405981 | 168 | ARL1       |
| chr7:99385701-99388261    | 2   | ARPC1B     |
| chr2:25759481-25771540    | 5   | ASXL2      |
| chr8:123359576-123361646  | 0   | ATAD2      |
| chr12:110327552-110328017 | 0   | ATP2A2     |
| chr19:1791749-1792135     | 17  | ATP8B3     |
| chr20:56386256-56388202   | 62  | AURKA      |
| chr16:88006089-88038011   | 20  | BANP       |
| chr22:17692355-17702386   | 0   | BCL2L13    |
| chr2:32501712-32508259    | 0   | BIRC6      |
| chr2:32543240-32575366    | 7   | BIRC6      |
| chr11:63817804-63819002   | 2   | C11orf84   |
| chr4:128008919-128021238  | 4   | C4orf29    |
| chr9:26861065-26887513    | 68  | CAAP1      |
| chr1:64663694-64664679    | 36  | CACHD1     |
| chr1:15493891-15495452    | 18  | CASP9      |
| chr4:77048448-77066405    | 17  | CCNI       |
| chr5:138201106-138202155  | 0   | CDC23      |
| chr17:47137151-47143982   | 8   | CDC27      |
| chr17:40293455-40294503   | 16  | CDC6       |
| chr16:22349278-22349849   | 221 | CDR2       |
| chr6:4881364-4892379      | 30  | CDYL       |
| chr1:26239761-26259802    | 26  | CEP85      |
| chr19:32881843-32899998   | 0   | CEP89      |
| chr21:36402757-36411604   | 35  | CHAF1B     |
| chr16:69150536-69154457   | 4   | CIRH1A     |
| chr16:1453833-1465338     | 0   | CLCN7      |
| chr17:31852811-31853030   | 0   | COPRS      |
| chr16:1632211-1641187     | 64  | CRAMP1L    |
| chr12:56275995-56282991   | 51  | CS         |

|                           |     |           |
|---------------------------|-----|-----------|
| chr20:49074784-49078622   | 6   | CSE1L     |
| chr1:112412193-112416264  | 13  | CTTNBP2NL |
| chr10:35032434-35039082   | 62  | CUL2      |
| chr10:35013698-35028887   | 23  | CUL2      |
| chr2:224495831-224500487  | 3   | CUL3      |
| chr2:224495831-224514772  | 26  | CUL3      |
| chr6:117503766-117521576  | 0   | DCBLD1    |
| chr11:108688935-108706837 | 5   | DDX10     |
| chr12:31084582-31085126   | 3   | DDX11     |
| chr10:68911067-68914204   | 86  | DDX50     |
| chr6:35312213-35312772    | 0   | DEF6      |
| chr1:197617658-197647114  | 0   | DENND1B   |
| chr11:9150080-9170777     | 19  | DENND5A   |
| chr12:15956935-15962947   | 10  | DERA      |
| chr7:111935539-111945798  | 28  | DOCK4     |
| chr2:26429627-26432006    | 2   | DRC1      |
| chr2:25576837-25596240    | 43  | DTNB      |
| chr11:103303092-103312033 | 32  | DYNC2H1   |
| chr1:46683299-46691937    | 34  | EFCAB14   |
| chr6:52429968-52438591    | 1   | EFHC1     |
| chr2:62706990-62831158    | 0   | EHBP1     |
| chr1:20941490-20973099    | 0   | EIF4G3    |
| chr22:41135812-41140257   | 81  | EP300     |
| chr5:65966735-65994864    | 1   | ERBB2IP   |
| chr18:21536041-21540700   | 27  | ESCO1     |
| chr10:97437190-97443311   | 0   | EXOSC1    |
| chr10:97436416-97438703   | 15  | EXOSC1    |
| chr1:28027788-28042650    | 18  | EYA3      |
| chr2:131067090-131082657  | 0   | FAM168B   |
| chr5:74834425-74841679    | 801 | FAM169A   |
| chr14:45148836-45159280   | 20  | FANCM     |
| chr2:241403827-241411130  | 18  | FARP2     |
| chr6:98875414-98905670    | 5   | FBXL4     |
| chr14:55350380-55355222   | 14  | FBXO34    |
| chr5:148394713-148402513  | 21  | FBXO38    |
| chr3:196577452-196577809  | 1   | FBXO45    |
| chr4:174259698-174263100  | 4   | FBXO8     |
| chr5:108832769-108832943  | 0   | FER       |
| chr6:109727108-109743772  | 13  | FIG4      |
| chr1:240177920-240211235  | 144 | FMN2      |
| chr17:82718905-82720363   | 0   | FN3KRP    |
| chr13:49138746-49167303   | 19  | FNDC3A    |
| chr2:48346200-48346751    | 118 | FOXN2     |

|                           |    |              |
|---------------------------|----|--------------|
| chr4:876529-877809        | 1  | GAK          |
| chr20:25417103-25441776   | 19 | GIN51        |
| chr9:3932359-3937189      | 4  | GLIS3        |
| chr1:28681085-28683740    | 2  | GMEB1        |
| chr2:53693883-53716743    | 13 | GPR75-ASB3   |
| chr19:42232056-42236941   | 25 | GSK3A        |
| chr9:133042086-133043926  | 79 | GTF3C5       |
| chr10:68014025-68038169   | 19 | HERC4        |
| chr1:113940381-113941459  | 48 | HIPK1        |
| chr5:133061815-133070496  | 0  | HSPA4        |
| chr5:5466333-5476079      | 14 | ICE1         |
| chr11:77921339-77922471   | 36 | INTS4        |
| chr11:77891318-77891840   | 20 | INTS4        |
| chr16:19730429-19733827   | 0  | IQCK         |
| chr12:26681873-26695650   | 24 | ITPR2        |
| chr13:30280062-30284882   | 92 | KATNAL1      |
| chr19:5119117-5119852     | 0  | KDM4B        |
| chr19:34327420-34330347   | 46 | KIAA0355     |
| chr6:17775014-17779099    | 21 | KIF13A       |
| chr7:130116444-130129576  | 3  | KLHDC10      |
| chr16:87748672-87762150   | 0  | KLHDC4       |
| chr11:118497935-118499420 | 10 | KMT2A        |
| chr22:33713547-33761558   | 2  | LARGE        |
| chr12:50453459-50454417   | 13 | LARP4        |
| chr14:92709671-92714451   | 17 | LGMN         |
| chr12:70219392-70225390   | 0  | LINC01481    |
| chr7:131052424-131053465  | 0  | LINC-PINT    |
| chr4:32146052-32158081    | 0  | LOC102723828 |
| chrX:19398225-19400663    | 2  | MAP3K15      |
| chr3:47998637-48065951    | 12 | MAP4         |
| chr2:39307942-39333574    | 14 | MAP4K3       |
| chr15:52045829-52050137   | 51 | MAPK6        |
| chr5:10415472-10417404    | 0  | 6-Mar        |
| chr12:57498156-57498623   | 89 | MARS         |
| chr5:69424600-69433093    | 0  | MARVELD2     |
| chr10:72868702-72871580   | 3  | MCU          |
| chr9:36597221-36607673    | 30 | MELK         |
| chr5:179798512-179799121  | 14 | MGAT4B       |
| chr22:46080338-46109353   | 0  | MIRLET7BHG   |
| chr8:54147381-54148266    | 2  | MRPL15       |
| chr15:52428397-52433285   | 0  | MYO5A        |
| chr10:93396141-93431516   | 0  | MYOF         |
| chr13:35056009-35070852   | 0  | NBEA         |

|                           |     |         |
|---------------------------|-----|---------|
| chr17:16177331-16194639   | 0   | NCOR1   |
| chr17:16164978-16194639   | 1   | NCOR1   |
| chr16:15664735-15667439   | 43  | NDE1    |
| chr16:23581053-23585423   | 12  | NDUFAB1 |
| chr2:206149779-206152510  | 0   | NDUFS1  |
| chr2:206127796-206133105  | 4   | NDUFS1  |
| chr3:131027929-131109921  | 0   | NEK11   |
| chr3:42621428-42632823    | 3   | NKTR    |
| chr1:169230717-169287408  | 286 | NME7    |
| chr6:42992933-43001374    | 0   | nogene  |
| chr5:179844364-179847400  | 0   | nogene  |
| chr1:247155565-247159867  | 8   | nogene  |
| chr19:33194286-33205759   | 19  | nogene  |
| chr9:111911025-111911611  | 33  | nogene  |
| chr11:65436537-65441442   | 0   | nogene  |
| chr12:11121009-11133367   | 26  | nogene  |
| chr6:142820032-142870339  | 0   | nogene  |
| chr15:67600644-67661494   | 31  | nogene  |
| chr11:65898455-65898727   | 40  | nogene  |
| chr19:11648357-11651885   | 0   | nogene  |
| chr17:13865078-13898732   | 1   | nogene  |
| chr16:15554687-15554998   | 0   | nogene  |
| chr19:11648357-11650417   | 18  | nogene  |
| chr10:100361532-100361724 | 3   | nogene  |
| chr12:87412676-87415076   | 0   | nogene  |
| chr7:128838314-128845194  | 0   | nogene  |
| chr1:8743202-8743493      | 15  | nogene  |
| chr4:48291800-48295899    | 0   | nogene  |
| chr17:76419610-76419965   | 0   | nogene  |
| chr6:126112865-126115855  | 5   | nogene  |
| chr5:151824990-151889465  | 21  | nogene  |
| chr17:46966533-46970309   | 18  | nogene  |
| chr1:58713055-58718748    | 46  | nogene  |
| chr9:79193521-79201407    | 0   | nogene  |
| chr3:113719462-113719743  | 0   | nogene  |
| chr4:35983011-36012831    | 0   | nogene  |
| chr5:177235820-177239865  | 86  | NSD1    |
| chr1:232955556-232956443  | 15  | NTPCR   |
| chr14:31562067-31673574   | 15  | NUBPL   |
| chr7:44404439-44427703    | 6   | NUDCD3  |
| chr16:56446625-56447989   | 1   | NUDT21  |
| chr1:229489954-229498306  | 40  | NUP133  |
| chr11:47783072-47785063   | 0   | NUP160  |

|                           |     |          |
|---------------------------|-----|----------|
| chr2:183151507-183188763  | 18  | NUP35    |
| chr6:149742389-149743715  | 8   | NUP43    |
| chr15:41356038-41375828   | 114 | NUSAP1   |
| chr11:74279387-74298361   | 0   | P4HA3    |
| chr13:28174271-28177935   | 401 | PAN3     |
| chr13:28174271-28197346   | 36  | PAN3     |
| chr16:14586317-14627336   | 21  | PARN     |
| chr13:100257594-100309908 | 17  | PCCA     |
| chr14:70988566-71023232   | 5   | PCNX     |
| chr1:119734633-119737266  | 19  | PHGDH    |
| chr16:71672261-71676649   | 20  | PHLPP2   |
| chr7:77840220-77922778    | 1   | PHTF2    |
| chr18:42037691-42058051   | 0   | PIK3C3   |
| chr1:151239954-151242567  | 25  | PIP5K1A  |
| chr20:45902266-45902604   | 0   | PLTP     |
| chr1:151427822-151442205  | 15  | POGZ     |
| chr19:1090907-1091907     | 14  | POLR2E   |
| chr4:105420329-105424322  | 0   | PPA2     |
| chr4:56403039-56406618    | 15  | PPAT     |
| chr6:149533457-149541586  | 27  | PPIL4    |
| chr2:48498492-48511468    | 10  | PPP1R21  |
| chr4:101093775-101099722  | 0   | PPP3CA   |
| chr11:129955511-129961082 | 7   | PRDM10   |
| chr4:120798266-120821317  | 0   | PRDM5    |
| chr6:57526954-57537625    | 4   | PRIM2    |
| chr8:47953619-47957431    | 132 | PRKDC    |
| chr17:18865468-18867334   | 37  | PRPSAP2  |
| chr1:151017811-151025673  | 4   | PRUNE    |
| chr10:16484336-16486617   | 33  | PTER     |
| chr12:56671748-56673065   | 127 | PTGES3   |
| chr8:140700890-140702707  | 85  | PTK2     |
| chr9:122957010-122996151  | 15  | RABGAP1  |
| chr1:174219124-174252590  | 0   | RABGAP1L |
| chr7:66805139-66810847    | 0   | RABGEF1  |
| chr7:66795510-66805396    | 19  | RABGEF1  |
| chr9:107321982-107325004  | 33  | RAD23B   |
| chr1:178283563-178420620  | 2   | RASAL2   |
| chr18:22982217-22984990   | 0   | RBBP8    |
| chr7:155763808-155774647  | 19  | RBM33    |
| chr3:50108069-50109688    | 0   | RBM5     |
| chr12:15111343-15348437   | 10  | REGG     |
| chr6:111349217-111357125  | 4   | REV3L    |
| chr1:176149005-176184692  | 76  | RFWD2    |

|                           |     |          |
|---------------------------|-----|----------|
| chr12:106825725-106860412 | 13  | RIC8B    |
| chr8:86486483-86507112    | 27  | RMDN1    |
| chr16:2262277-2264331     | 49  | RNPS1    |
| chr1:27897004-27907282    | 0   | RPA2     |
| chr8:73291042-73292797    | 21  | RPL7     |
| chr1:150457287-150457570  | 17  | RPRD2    |
| chr16:57216106-57221415   | 0   | RSPRY1   |
| chr6:106583327-106602922  | 33  | RTN4IP1  |
| chr3:128097299-128104924  | 70  | RUVBL1   |
| chr10:70153837-70161931   | 11  | SAR1A    |
| chr11:9895942-9963882     | 0   | SBF2     |
| chr14:30705822-30734858   | 17  | SCFD1    |
| chrX:18304971-18334095    | 15  | SCML2    |
| chrX:18246576-18257030    | 0   | SCML2    |
| chr7:29923955-29926632    | 20  | SCRN1    |
| chr3:185614563-185624082  | 0   | SENP2    |
| chrX:119640691-119675668  | 0   | 6-Sep    |
| chr16:70532478-70541834   | 63  | SF3B3    |
| chr16:28871779-28873579   | 2   | SH2B1    |
| chrX:19683822-19695741    | 90  | SH3KBP1  |
| chr22:40777039-40794580   | 2   | SLC25A17 |
| chr2:26764682-26775215    | 0   | SLC35F6  |
| chr3:126050897-126068246  | 0   | SLC41A3  |
| chr18:47848474-47865133   | 0   | SMAD2    |
| chr18:2688393-2688747     | 15  | SMCHD1   |
| chr1:245858495-245915640  | 23  | SMYD3    |
| chr19:45686533-45688566   | 14  | SNRPD2   |
| chr5:122801868-122808355  | 0   | SNX2     |
| chr4:185247293-185346650  | 13  | SNX25    |
| chr7:2264297-2278305      | 20  | SNX8     |
| chr6:107633513-107635469  | 18  | SOBP     |
| chr15:44567423-44572820   | 3   | SPG11    |
| chr18:12493071-12546904   | 29  | SPIRE1   |
| chr2:54616206-54623596    | 0   | SPTBN1   |
| chr2:45546731-45553730    | 366 | SRBD1    |
| chr1:70221614-70228555    | 24  | SRSF11   |
| chr14:69770466-69771544   | 0   | SRSF5    |
| chr2:85861180-85863485    | 2   | ST3GAL5  |
| chr3:136477288-136521417  | 0   | STAG1    |
| chr8:73595165-73688813    | 1   | STAU2    |
| chr20:44995089-45001353   | 103 | STK4     |
| chr1:172551511-172591071  | 31  | SUCO     |
| chr9:33503826-33510711    | 21  | SUGT1P1  |

|                          |     |         |
|--------------------------|-----|---------|
| chr3:4449265-4453049     | 18  | SUMF1   |
| chr6:45003652-45020626   | 0   | SUPT3H  |
| chr1:185202653-185222036 | 0   | SWT1    |
| chr4:1727707-1728787     | 4   | TACC3   |
| chr17:37437737-37440662  | 5   | TADA2A  |
| chr1:234463836-234472811 | 0   | TARBP1  |
| chr20:13559007-13630152  | 13  | TASP1   |
| chr10:94441895-94500327  | 34  | TBC1D12 |
| chr6:121106022-121131752 | 2   | TBC1D32 |
| chr6:121126377-121170527 | 2   | TBC1D32 |
| chr8:55792697-55813118   | 14  | TGS1    |
| chr2:241632916-241634079 | 198 | THAP4   |
| chr2:241601895-241634079 | 0   | THAP4   |
| chr22:29517028-29519120  | 1   | THOC5   |
| chr9:100498764-100561520 | 12  | TMEFF1  |
| chr9:109073355-109093591 | 18  | TMEM245 |
| chr15:43148754-43160794  | 15  | TMEM62  |
| chr22:40273424-40285770  | 56  | TNRC6B  |
| chr9:98091908-98095029   | 18  | TRIM14  |
| chr7:138504289-138519321 | 0   | TRIM24  |
| chr5:904147-908461       | 3   | TRIP13  |
| chr15:64414084-64425631  | 4   | TRIP4   |
| chr22:46343261-46346544  | 16  | TRMU    |
| chr20:35035122-35055031  | 17  | TRPC4AP |
| chr2:32630522-32650233   | 6   | TTC27   |
| chr22:28296197-28306643  | 55  | TTC28   |
| chr18:24123833-24130417  | 3   | TTC39C  |
| chr7:67024899-67050066   | 0   | TYW1    |
| chr7:67098540-67117618   | 185 | TYW1    |
| chr1:162576776-162600903 | 132 | UAP1    |
| chr19:34458768-34467014  | 15  | UBA2    |
| chr6:42615070-42617338   | 0   | UBR2    |
| chr2:169926691-169933008 | 0   | UBR3    |
| chr1:161153997-161157693 | 0   | UFC1    |
| chr13:27069110-27090158  | 40  | USP12   |
| chr2:233549100-233551519 | 37  | USP40   |
| chr2:63949036-63972244   | 0   | VPS54   |
| chr3:184824544-184839752 | 0   | VPS8    |
| chr13:51719197-51739175  | 13  | WDFY2   |
| chr2:159248371-159256375 | 2   | WDSUB1  |
| chr16:69783031-69799295  | 0   | WWP2    |
| chr19:43553706-43554645  | 0   | XRCC1   |
| chr17:1361091-1362008    | 730 | YWHAE   |

|                           |     |            |
|---------------------------|-----|------------|
| chr4:112562370-112589874  | 46  | ZGRF1      |
| chr20:47246007-47262428   | 0   | ZMYND8     |
| chr19:51877281-51886912   | 95  | ZNF577     |
| chr4:145886032-145903215  | 0   | ZNF827     |
| chr20:49260462-49263483   | 3   | ZNFX1      |
| chr2:113916883-113934386  | 2   | ACTR3      |
| chr15:100199317-100331054 | 27  | ADAMTS17   |
| chr15:72518066-72555907   | 113 | ARIH1      |
| chr8:123357561-123361646  | 1   | ATAD2      |
| chr2:28025225-28129380    | 3   | BRE        |
| chr17:63760913-63766194   | 60  | CCDC47     |
| chr9:120529977-120568388  | 35  | CDK5RAP2   |
| chr8:60741258-60743097    | 127 | CHD7       |
| chr17:30785918-30792572   | 16  | CRLF3      |
| chr10:43163865-43176032   | 7   | CSGALNACT2 |
| chr15:65741714-65752628   | 1   | DENND4A    |
| chr3:124857231-124859446  | 25  | ITGB5      |
| chr13:30227411-30241681   | 1   | KATNAL1    |
| chr2:61113769-61118116    | 115 | KIAA1841   |
| chr6:83194530-83195739    | 19  | nogene     |
| chr1:246186742-246195464  | 54  | nogene     |
| chr9:93629969-93636525    | 71  | PHF2       |
| chr3:52122378-52138302    | 43  | POC1A      |
| chr7:100111727-100112253  | 9   | TAF6       |
| chr2:159194256-159199053  | 14  | TANC1      |
| chr2:170015280-170055584  | 2   | UBR3       |
| chr9:133806080-133834340  | 14  | VAV2       |
| chr8:144829042-144837507  | 18  | ZNF7       |
| chr13:29553760-29560349   | 87  | SLC7A1     |
| chr2:121757239-121761524  | 475 | TSN        |
| chr11:93702459-93706897   | 24  | CEP295     |
| chr4:150735257-150872755  | 36  | LRBA       |
| chr16:19703041-19704172   | 15  | nogene     |
| chr17:2603507-2603835     | 14  | nogene     |
| chr16:11733981-11736233   | 2   | TXNDC11    |
| chr9:132658670-132662695  | 34  | DDX31      |
| chr6:161165576-161166417  | 23  | AGPAT4     |
| chr11:128758114-128782023 | 23  | FLI1       |
| chr10:3163724-3167042     | 24  | PITRM1     |
| chr1:46309100-46310316    | 40  | UQCRH      |
| chr9:85974966-85978381    | 33  | NAA35      |
| chr16:66813563-66823600   | 27  | NAE1       |
| chr2:85043563-85046278    | 45  | KCMF1      |



|                           |     |          |
|---------------------------|-----|----------|
| chr14:102968252-102970261 | 42  | CDC42BPB |
| chr22:41140139-41141222   | 33  | EP300    |
| chr11:78465875-78571444   | 8   | NARS2    |
| chr4:122170614-122175914  | 14  | KIAA1109 |
| chr6:53076485-53081098    | 12  | FBXO9    |
| chr3:155893517-155911279  | 203 | GMPS     |
| chrX:63314996-63323240    | 7   | nogene   |
| chr2:120278617-120293309  | 18  | RALB     |
| chr6:144537581-144542870  | 63  | UTRN     |
| chr8:67287954-67302466    | 63  | ARFGEF1  |
| chr8:90042727-90044995    | 15  | DECR1    |
| chr8:120453846-120463761  | 1   | MTBP     |
| chr13:24459043-24493733   | 37  | PARP4    |
| chr15:43146492-43160794   | 10  | TMEM62   |
| chr6:145671238-145686296  | 4   | EPM2A    |
| chr2:38313150-38343512    | 0   | ATL2     |
| chr12:22482556-22493337   | 0   | C2CD5    |
| chr22:19048439-19089490   | 3   | DGCR2    |
| chr10:99894945-99898760   | 15  | DNMBP    |
| chr17:82091707-82092454   | 0   | FASN     |
| chr2:175964371-175979868  | 36  | KIAA1715 |
| chr7:131387119-131411383  | 58  | MKLN1    |
| chr14:50738139-50741728   | 0   | NIN      |
| chr11:29044444-29106315   | 0   | nogene   |
| chr5:132920343-132920876  | 33  | nogene   |
| chr8:125182102-125195272  | 214 | NSMCE2   |
| chr20:38488402-38497516   | 1   | RALGAPB  |
| chr8:47728932-47729465    | 1   | SPIDR    |
| chr17:82756164-82772507   | 216 | TBCD     |
| chr10:104018159-104018908 | 4   | SLK      |
| chr15:49225204-49328130   | 21  | nogene   |
| chr13:100309832-100368574 | 3   | PCCA     |
| chr1:222715683-222722514  | 4   | BROX     |
| chr4:82454721-82457038    | 132 | ENOPH1   |
| chr2:47818778-47819078    | 41  | FBXO11   |
| chr10:63217206-63219983   | 24  | JMJD1C   |
| chr1:77734346-77736158    | 3   | USP33    |
| chr10:68737844-68747566   | 21  | CCAR1    |
| chr19:45357269-45357699   | 40  | ERCC2    |
| chr17:44424348-44436545   | 31  | GPATCH8  |
| chr2:20307977-20318645    | 41  | PUM2     |
| chr2:61178980-61185618    | 40  | AHSA2    |
| chr15:85655416-85669830   | 20  | AKAP13   |

|                           |     |           |
|---------------------------|-----|-----------|
| chr15:50719939-50749746   | 3   | SPPL2A    |
| chr4:153550072-153558368  | 39  | KIAA0922  |
| chr17:82563353-82571870   | 180 | FOXK2     |
| chr19:43880009-43884051   | 35  | ZNF404    |
| chr21:32453311-32467848   | 25  | EVA1C     |
| chr5:177626435-177632738  | 53  | LOC202181 |
| chr22:32478980-32485209   | 174 | FBXO7     |
| chr12:64423004-64431823   | 4   | XPOT      |
| chr1:162566011-162597858  | 69  | UAP1      |
| chr14:68890138-68893747   | 25  | ACTN1     |
| chr11:65855934-65856242   | 19  | CFL1      |
| chr9:112405623-112409021  | 19  | HSDL2     |
| chr1:226265532-226268090  | 3   | LIN9      |
| chr16:18841564-18845651   | 140 | SMG1      |
| chr3:52412810-52414587    | 96  | PHF7      |
| chr11:112078214-112080558 | 49  | C11orf57  |
| chr3:32532985-32541206    | 3   | DYNC1LI1  |
| chr2:15394226-15427794    | 26  | NBAS      |
| chr12:102257214-102423180 | 3   | nogene    |
| chr9:133437748-133438366  | 42  | ADAMTS13  |
| chr17:12908896-12929046   | 17  | ARHGAP44  |
| chr1:62803718-62810586    | 25  | ATG4C     |
| chr5:69292187-69311204    | 1   | CCDC125   |
| chr1:97515725-97595166    | 36  | DPYD      |
| chr15:49292326-49308777   | 7   | GALK2     |
| chr15:49201161-49239367   | 6   | GALK2     |
| chr3:33068229-33068970    | 124 | GLB1      |
| chr16:27537783-27545523   | 3   | GTF3C1    |
| chr14:50265357-50303017   | 2   | L2HGDH    |
| chr16:72284571-72349206   | 5   | LINC01572 |
| chr11:94429910-94447438   | 100 | MRE11A    |
| chr5:16684969-16685320    | 1   | nogene    |
| chr10:49832802-49857453   | 4   | PARG      |
| chr19:43186341-43198275   | 2   | PSG5      |
| chr6:42885973-42886470    | 24  | RPL7L1    |
| chr11:66365935-66369532   | 38  | SLC29A2   |
| chr4:122935713-122938249  | 5   | SPATA5    |
| chr11:119070233-119073951 | 9   | VPS11     |
| chr9:19356971-19360489    | 20  | DENND4C   |
| chr4:74199793-74201370    | 9   | MTHFD2L   |
| chr3:154217868-154240579  | 45  | ARHGEF26  |
| chr7:33146241-33183405    | 43  | BBS9      |
| chr12:50430494-50437838   | 11  | LARP4     |

|                           |     |           |
|---------------------------|-----|-----------|
| chr20:34297589-34297878   | 15  | nogene    |
| chr12:128799258-128801009 | 19  | SLC15A4   |
| chr2:134866541-134869041  | 6   | CCNT2-AS1 |
| chr16:27749583-27751924   | 20  | KIAA0556  |
| chr4:26748410-26764737    | 17  | TBC1D19   |
| chr16:67036638-67082308   | 420 | CBFB      |
| chr9:77794462-77815770    | 41  | GNAQ      |
| chr10:67954594-68014186   | 46  | HERC4     |
| chr12:98548946-98549335   | 15  | nogene    |
| chr12:112946742-112950975 | 11  | OAS3      |
| chr1:112576985-112600848  | 36  | ST7L      |
| chr13:98519242-98519473   | 54  | STK24     |
| chr1:40540585-40541710    | 13  | ZNF684    |
| chr16:70314901-70317588   | 12  | DDX19B    |
| chr17:82900650-82909307   | 54  | TBCD      |
| chr17:66732687-66738855   | 2   | PRKCA     |
| chr11:73363833-73364134   | 0   | ARHGEF17  |
| chr9:96471010-96484633    | 0   | HABP4     |
| chr2:26212569-26215175    | 0   | HADHA     |
| chr2:240782589-240789312  | 0   | KIF1A     |
| chr12:121416158-121420334 | 15  | RNF34     |
| chr1:186341027-186344090  | 23  | TPR       |
| chr1:52471951-52475535    | 0   | ZCCHC11   |
| chr7:55171174-55174820    | 17  | EGFR      |
| chr3:136989440-136995556  | 21  | IL20RB    |
| chr5:131510313-131521521  | 1   | RAPGEF6   |
| chr5:134697125-134708888  | 11  | SEC24A    |
| chr21:32457596-32467848   | 2   | EVA1C     |
| chr19:39457674-39459960   | 17  | SUPT5H    |
| chr8:124515745-124523002  | 6   | TATDN1    |
| chr16:58670112-58672243   | 16  | SLC38A7   |
| chr2:46950362-46978907    | 7   | TTC7A     |
| chr11:66748378-66788269   | 12  | C11orf80  |
| chr6:15374116-15410365    | 6   | JARID2    |
| chr16:25164597-25170805   | 13  | LCMT1     |
| chr17:59070822-59084089   | 54  | TRIM37    |
| chr11:33551039-33552241   | 172 | KIAA1549L |
| chr19:34633158-34669864   | 20  | nogene    |
| chr8:98123335-98130226    | 32  | POP1      |
| chr6:57193841-57207713    | 1   | RAB23     |
| chr3:49368427-49373342    | 14  | RHOA      |
| chr11:65434478-65437657   | 15  | nogene    |
| chr10:179993-210048       | 34  | ZMYND11   |

|                           |      |              |
|---------------------------|------|--------------|
| chr3:119905754-119947351  | 12   | GSK3B        |
| chr17:12054888-12095694   | 509  | MAP2K4       |
| chr17:17792932-17803849   | 1    | RAI1         |
| chr18:22968805-22984990   | 23   | RBBP8        |
| chr18:70145611-70150733   | 19   | RTTN         |
| chr9:14639895-14680162    | 394  | ZDHHC21      |
| chr19:9566335-9568175     | 55   | ZNF121       |
| chr20:62854015-62859526   | 48   | TCFL5        |
| chr2:120019076-120042110  | 65   | EPB41L5      |
| chr12:122530021-122539754 | 19   | KNTC1        |
| chr6:88769773-88853764    | 80   | RNGTT        |
| chr1:40267785-40286029    | 4    | ZMPSTE24     |
| chr6:35637013-35646366    | 15   | FKBP5        |
| chr15:67208561-67236820   | 0    | AAGAB        |
| chr12:70319297-70330469   | 7    | CNOT2        |
| chr20:49084025-49089746   | 0    | CSE1L        |
| chr11:33337074-33341686   | 15   | HIPK3        |
| chr13:75621762-75804541   | 13   | LMO7         |
| chrX:120162946-120240355  | 0    | NKAPP1       |
| chr22:43039779-43046544   | 0    | nogene       |
| chrX:123686547-123703505  | 15   | THOC2        |
| chr12:29356381-29361685   | 16   | ERGIC2       |
| chr5:162093827-162104026  | 27   | GABRG2       |
| chr3:144237757-144304804  | 21   | nogene       |
| chr5:55322326-55328811    | 52   | SKIV2L2      |
| chr17:78803384-78803978   | 57   | USP36        |
| chr15:64930821-64934234   | 1    | ANKDD1A      |
| chr17:18872582-18882683   | 1    | PRPSAP2      |
| chr10:68959805-68967203   | 31   | DDX21        |
| chr10:34696317-34728116   | 17   | PARD3        |
| chr3:47706408-47736126    | 26   | SMARCC1      |
| chr3:52730324-52741499    | 16   | NEK4         |
| chr11:66651739-66657259   | 16   | nogene       |
| chr1:108896863-108904254  | 17   | GPSM2        |
| chr22:19253958-19254227   | 20   | CLTCL1       |
| chr2:190900563-190905167  | 43   | GLS          |
| chr13:52632421-52637446   | 17   | HNRNPA1L2    |
| chr14:21230318-21234229   | 1171 | HNRNPC       |
| chr15:69423158-69426457   | 28   | KIF23        |
| chr18:58342905-58357252   | 17   | NEDD4L       |
| chr11:102362895-102368548 | 318  | BIRC2        |
| chr18:6974902-6980637     | 10   | LAMA1        |
| chr15:30745021-30750556   | 51   | LOC100288637 |

|                           |     |           |
|---------------------------|-----|-----------|
| chr13:114040999-114057474 | 67  | RASA3     |
| chr11:73707419-73718718   | 567 | RAB6A     |
| chr11:108838445-108852209 | 11  | DDX10     |
| chr20:34089515-34093731   | 1   | EIF2S2    |
| chr19:4110508-4117629     | 15  | MAP2K2    |
| chr11:28290205-28296931   | 1   | METTL15   |
| chr2:24554388-24584560    | 7   | NCOA1     |
| chr1:176162868-176163891  | 4   | RFWD2     |
| chr16:53619024-53622356   | 39  | RPGRIP1L  |
| chr9:15199860-15211397    | 11  | TTC39B    |
| chr19:34431860-34434968   | 16  | UBA2      |
| chr9:77238001-77252352    | 6   | VPS13A    |
| chr9:19360243-19361963    | 6   | DENND4C   |
| chr16:931641-954666       | 2   | LMF1      |
| chr8:120413990-120432123  | 40  | MRPL13    |
| chr3:101579789-101585511  | 8   | PCNP      |
| chr1:26729650-26732792    | 638 | ARID1A    |
| chr22:35936290-35938897   | 14  | RBFOX2    |
| chr9:133806080-133861432  | 4   | VAV2      |
| chr13:95723241-95725252   | 47  | DNAJC3    |
| chr1:99668622-99671404    | 20  | nogene    |
| chr18:12506476-12635096   | 19  | SPIRE1    |
| chr9:33953284-33963791    | 853 | UBAP2     |
| chr1:155269428-155270977  | 1   | CLK2      |
| chr5:75411010-75417033    | 3   | COL4A3BP  |
| chr2:36396613-36464655    | 245 | CRIM1     |
| chr9:96949554-96972948    | 90  | HIATL2    |
| chr7:1486624-1489682      | 9   | INTS1     |
| chr16:206003-220747       | 1   | LUC7L     |
| chr12:82369386-82434724   | 1   | METTL25   |
| chr8:70213902-70296800    | 6   | NCOA2     |
| chr8:140700890-140706205  | 392 | PTK2      |
| chr18:12830942-12859254   | 1   | PTPN2     |
| chr2:11235701-11235962    | 1   | ROCK2     |
| chr7:35781208-35794022    | 4   | SEPT7-AS1 |
| chr8:123077110-123097441  | 97  | TBC1D31   |
| chr18:23309679-23373763   | 25  | TMEM241   |
| chr1:54040755-54047372    | 14  | TMEM59    |
| chr1:165680486-165695397  | 9   | ALDH9A1   |
| chr9:20715321-20885230    | 2   | FOCAD     |
| chr6:125855019-125855240  | 3   | NCOA7     |
| chr6:57182031-57190666    | 5   | BAG2      |
| chrX:129908059-129911921  | 45  | UTP14A    |

|                           |     |          |
|---------------------------|-----|----------|
| chr9:96515648-96565483    | 28  | CDC14B   |
| chr22:33564847-33577964   | 104 | LARGE    |
| chr10:27180952-27181581   | 21  | MASTL    |
| chr6:7187433-7189322      | 32  | RREB1    |
| chr7:43595900-43608400    | 16  | STK17A   |
| chr4:13179195-13182068    | 4   | nogene   |
| chr19:53555844-53571730   | 3   | ZNF331   |
| chr7:100102674-100102960  | 30  | AP4M1    |
| chr1:235454155-235470960  | 0   | B3GALNT2 |
| chr1:108930070-108932501  | 0   | CLCC1    |
| chr12:132037681-132038096 | 39  | EP400    |
| chr1:153663214-153665336  | 15  | ILF2     |
| chr15:100922774-100924729 | 2   | LRRK1    |
| chr10:26966678-26969653   | 0   | nogene   |
| chr14:90610741-90786328   | 0   | TTC7B    |
| chr3:38362936-38365736    | 0   | XYLB     |
| chr17:18330554-18340813   | 16  | SHMT1    |
| chr1:114463103-114464388  | 429 | TRIM33   |
| chr9:2115821-2123937      | 13  | SMARCA2  |
| chr6:144482208-144485519  | 12  | UTRN     |
| chr3:121467518-121468431  | 2   | POLQ     |
| chr22:25375812-25376008   | 33  | LRP5L    |
| chr1:145825756-145827005  | 25  | POLR3C   |
| chr1:39370029-39372596    | 28  | MACF1    |
| chr16:74660931-74661451   | 182 | RFWD3    |
| chr7:85055716-85065552    | 15  | SEMA3D   |
| chr9:77794462-77824880    | 14  | GNAQ     |
| chr12:32293993-32306122   | 4   | BICD1    |
| chr1:225117683-225123614  | 9   | DNAH14   |
| chr1:32030297-32037043    | 23  | KHDRBS1  |
| chr2:237748363-237760205  | 30  | LRRFIP1  |
| chr3:104764378-104842744  | 1   | nogene   |
| chrX:68096869-68193952    | 4   | OPHN1    |
| chr10:73072028-73074915   | 10  | P4HA1    |
| chr10:94474667-94500327   | 21  | TBC1D12  |
| chr2:61488164-61490776    | 19  | XPO1     |
| chr6:4042486-4044023      | 19  | PRPF4B   |
| chr1:70296129-70315566    | 28  | ANKRD13C |
| chr2:55232807-55234962    | 19  | RPS27A   |
| chr2:68141693-68147567    | 11  | WDR92    |
| chr3:43565652-43580472    | 14  | ANO10    |
| chr4:150302624-150350159  | 3   | LRBA     |
| chr7:134137022-134183853  | 17  | LRGUK    |

|                           |     |           |
|---------------------------|-----|-----------|
| chr20:38065802-38066256   | 172 | RPRD1B    |
| chr1:28491649-28493091    | 9   | PHACTR4   |
| chr3:125277725-125331238  | 120 | ZNF148    |
| chr3:33687059-33689932    | 13  | CLASP2    |
| chr7:66130743-66134374    | 102 | CRCP      |
| chr20:37777344-37779335   | 13  | CTNBL1    |
| chr7:886055-893971        | 18  | GET4      |
| chr8:66804374-66822459    | 3   | SGK3      |
| chr2:32514989-32518946    | 27  | BIRC6     |
| chr7:6042932-6050045      | 36  | EIF2AK1   |
| chr2:15475686-15478289    | 2   | NBAS      |
| chr9:22301599-22337312    | 5   | no gene   |
| chr3:10028624-10036339    | 21  | FANCD2    |
| chr3:183775914-183790980  | 25  | YEATS2    |
| chr7:152814549-152825122  | 5   | ACTR3B    |
| chr5:77098654-77118521    | 17  | ZBED3-AS1 |
| chr5:57246299-57251141    | 52  | GPBP1     |
| chr10:119051198-119059397 | 4   | EIF3A     |
| chr5:41850029-41862750    | 35  | OXCT1     |
| chr11:47582087-47582468   | 28  | NDUFS3    |
| chr12:42374862-42398994   | 160 | PPHLN1    |
| chr11:65502320-65505019   | 14  | no gene   |
| chr12:22469708-22474891   | 1   | C2CD5     |
| chr4:152829624-152872564  | 41  | ARFIP1    |
| chr8:130179263-130187285  | 23  | ASAP1     |
| chr7:72830691-72831798    | 30  | SBDSP1    |
| chr9:128739930-128742745  | 12  | ZER1      |
| chr2:15461200-15478289    | 152 | NBAS      |
| chr1:193138084-193142066  | 52  | CDC73     |
| chr8:67131950-67137603    | 151 | CSPP1     |
| chr6:100848147-100848707  | 25  | ASCC3     |
| chr10:65585664-65615761   | 17  | LINC01515 |
| chr17:16137310-16146548   | 34  | NCOR1     |
| chr17:68522755-68524958   | 2   | PRKAR1A   |
| chr14:30670255-30694869   | 2   | SCFD1     |
| chr1:32553458-32557965    | 14  | ZBTB8A    |
| chr17:44154555-44155411   | 142 | C17orf53  |
| chr5:31448546-31495372    | 16  | DROSHA    |
| chr7:105073618-105081797  | 50  | KMT2E     |
| chr7:4076997-4079584      | 16  | SDK1      |
| chr12:102039867-102061346 | 2   | CCDC53    |
| chr1:222594235-222603276  | 42  | no gene   |
| chr15:89792159-89793126   | 8   | ANPEP     |

|                           |     |           |
|---------------------------|-----|-----------|
| chr2:168012633-168129758  | 12  | STK39     |
| chr16:47451395-47459175   | 41  | ITFG1     |
| chr4:127930682-127933093  | 16  | MFSD8     |
| chr7:6432788-6436533      | 46  | DAGLB     |
| chr12:31442774-31452476   | 15  | DENND5B   |
| chr14:76154743-76195972   | 2   | GPATCH2L  |
| chr6:57379900-57507454    | 2   | PRIM2     |
| chr11:76360955-76365972   | 85  | PRKRIR    |
| chr3:12935447-12941865    | 51  | IQSEC1    |
| chr3:132434537-132447939  | 9   | DNAJC13   |
| chr5:73901183-73911575    | 1   | ARHGEF28  |
| chr5:5447840-5457741      | 23  | ICE1      |
| chr12:122570875-122574380 | 3   | KNTC1     |
| chr12:57932009-57932421   | 3   | nogene    |
| chr4:76134174-76144473    | 359 | NUP54     |
| chr14:73071626-73077536   | 31  | RBM25     |
| chr20:33385649-33392242   | 15  | CDK5RAP1  |
| chr11:78465875-78469313   | 15  | NARS2     |
| chr16:21315310-21317126   | 33  | nogene    |
| chr9:132271709-132281574  | 1   | SETX      |
| chr8:47912409-47915418    | 21  | PRKDC     |
| chr4:169585348-169599197  | 12  | NEK1      |
| chr3:52737585-52752336    | 12  | NEK4      |
| chr12:42355160-42387535   | 11  | PPHLN1    |
| chr2:53887258-53893799    | 15  | PSME4     |
| chr13:29522316-29524253   | 12  | SLC7A1    |
| chr13:21400372-21413772   | 12  | ZDHHC20   |
| chr3:155903862-155911279  | 23  | GMPS      |
| chr11:66365935-66366564   | 15  | SLC29A2   |
| chr2:207976650-207977586  | 368 | PLEKHM3   |
| chrX:71303261-71304300    | 1   | ITGB1BP2  |
| chr9:22820737-22821598    | 24  | LINC01239 |
| chr2:224556294-224558241  | 2   | nogene    |
| chr12:31423596-31424687   | 8   | DENND5B   |
| chr6:151331792-151332131  | 17  | nogene    |
| chr7:848417-866067        | 16  | SUN1      |
| chr17:50353629-50356773   | 12  | XYLT2     |
| chr15:49588015-49590007   | 14  | FAM227B   |
| chr5:146260744-146263631  | 18  | RBM27     |
| chr22:42808766-42817857   | 11  | ARFGAP3   |
| chr7:105472131-105502564  | 16  | PUS7      |
| chr16:87730551-87755292   | 4   | KLHDC4    |
| chr3:48927461-48980496    | 60  | ARIH2     |



|                           |      |           |
|---------------------------|------|-----------|
| chr15:85075861-85083644   | 3    | PDE8A     |
| chr10:31373121-31461237   | 2    | ZEB1      |
| chr10:27167101-27171083   | 8    | MASTL     |
| chr10:50343491-50344345   | 35   | SGMS1     |
| chr11:992502-1000598      | 17   | AP2A2     |
| chr3:184964467-184983094  | 2    | VPS8      |
| chr3:123110943-123124343  | 12   | PDIA5     |
| chr5:128112813-128161800  | 17   | SLC12A2   |
| chr2:111831285-111838512  | 18   | ANAPC1    |
| chr8:103040797-103042407  | 24   | ATP6V1C1  |
| chr19:19492305-19492712   | 226  | GATAD2A   |
| chr15:64112572-64123546   | 57   | SNX1      |
| chr5:177209635-177212195  | 57   | NSD1      |
| chr22:31580271-31611840   | 3    | SFI1      |
| chr3:197814907-197820430  | 135  | LRCH3     |
| chr3:197051576-197069260  | 50   | DLG1      |
| chr9:127311635-127320778  | 34   | GARNL3    |
| chr15:63712774-63716473   | 38   | HERC1     |
| chr7:36330981-36334161    | 2    | KIAA0895  |
| chr15:55924645-55966546   | 8    | NEDD4     |
| chr19:44686055-44687108   | 2    | nogene    |
| chr5:168488601-168494650  | 1469 | RARS      |
| chr10:75168540-75176216   | 3    | SAMD8     |
| chr6:107503656-107533610  | 90   | SOBP      |
| chr1:32094783-32100562    | 30   | TMEM39B   |
| chr3:179708772-179721589  | 2    | USP13     |
| chr11:76985642-76998821   | 6    | ACER3     |
| chr5:179708977-179710065  | 1    | CANX      |
| chr14:30911776-30956242   | 43   | STRN3     |
| chr12:122030699-122044053 | 55   | BCL7A     |
| chr19:17567405-17568713   | 11   | COLGALT1  |
| chr16:68038005-68054617   | 8    | DUS2      |
| chr1:92605306-92625934    | 27   | EVI5      |
| chr5:108341926-108348530  | 136  | FBXL17    |
| chr16:56434330-56447989   | 15   | NUDT21    |
| chr17:29684562-29703062   | 160  | SSH2      |
| chr5:71495249-71504751    | 4    | BDP1      |
| chr1:19770541-19787117    | 6    | TMCO4     |
| chr14:102983555-102986580 | 4    | CDC42BPB  |
| chr16:70514334-70519731   | 4    | COG4      |
| chr7:66395878-66402545    | 2    | LINC00174 |
| chr2:15488893-15539356    | 43   | NBAS      |
| chr1:5952699-5969259      | 2    | NPHP4     |

|                           |     |          |
|---------------------------|-----|----------|
| chr8:65734793-65745470    | 2   | PDE7A    |
| chr3:170149085-170178938  | 9   | PHC3     |
| chr2:159149141-159150556  | 53  | TANC1    |
| chr5:157841488-157841730  | 58  | nogene   |
| chr7:3433042-3440256      | 15  | nogene   |
| chr12:113269756-113284771 | 1   | TPCN1    |
| chr6:30710662-30711130    | 15  | nogene   |
| chr1:244418759-244420296  | 18  | ADSS     |
| chr11:72867864-72889945   | 86  | FCHSD2   |
| chr5:108883395-108897848  | 15  | FER      |
| chr16:4822874-4832912     | 1   | GLYR1    |
| chr10:69392124-69395105   | 0   | HK1      |
| chr3:44801449-44812289    | 16  | KIF15    |
| chr2:46612227-46615185    | 36  | PIGF     |
| chr14:49663314-49674427   | 223 | POLE2    |
| chr20:13559007-13610919   | 12  | TASP1    |
| chr6:133980081-133984479  | 0   | TBPL1    |
| chr7:103025062-103029418  | 30  | FBXL13   |
| chr19:12928341-12928932   | 30  | FARSA    |
| chr7:156756392-156826744  | 180 | LMBR1    |
| chr7:22960255-22976305    | 2   | FAM126A  |
| chr5:108768092-108835807  | 6   | FER      |
| chr15:34896896-34897705   | 4   | AQR      |
| chr12:22484696-22513379   | 15  | C2CD5    |
| chr7:90726566-90726812    | 182 | CDK14    |
| chr20:33360350-33374212   | 1   | CDK5RAP1 |
| chr8:128009589-128010444  | 324 | nogene   |
| chr9:124971369-124999990  | 8   | SCAI     |
| chr4:109513746-109520484  | 17  | SEC24B   |
| chr7:2263229-2278305      | 60  | SNX8     |
| chr1:48355669-48359770    | 74  | SPATA6   |
| chr6:56699652-56704369    | 41  | DST      |
| chr6:90561621-90571807    | 16  | MAP3K7   |
| chr18:21765771-21773728   | 12  | MIB1     |
| chr11:126181494-126183087 | 54  | nogene   |
| chr2:183133565-183159652  | 36  | NUP35    |
| chr12:50437734-50454417   | 2   | LARP4    |
| chr1:233198938-233208689  | 247 | PCNXL2   |
| chr17:81270917-81276151   | 3   | SLC38A10 |
| chr15:29761138-29800702   | 33  | TJP1     |
| chr5:43122043-43139309    | 5   | ZNF131   |
| chr5:160035139-160043169  | 94  | TTC1     |
| chr6:170388286-170395579  | 93  | FAM120B  |

|                           |      |          |
|---------------------------|------|----------|
| chr15:89102499-89116521   | 2    | ABHD2    |
| chr2:9448197-9459618      | 15   | CPSF3    |
| chr7:919967-935505        | 34   | ADAP1    |
| chr7:44024915-44025559    | 2    | nogene   |
| chr15:90981747-90981981   | 2    | PRC1     |
| chr12:120557281-120557682 | 83   | RNF10    |
| chr10:73819531-73824084   | 3    | CAMK2G   |
| chr22:46384542-46386585   | 5    | CELSR1   |
| chr18:46815311-46821072   | 32   | PIAS2    |
| chr9:135866455-135883078  | 237  | CAMSAP1  |
| chr2:127271335-127293718  | 3    | ERCC3    |
| chr17:62524235-62536337   | 36   | TLK2     |
| chr2:74167013-74172752    | 7    | MOB1A    |
| chr19:5700788-5705992     | 9    | LONP1    |
| chr10:13172375-13186280   | 32   | MCM10    |
| chr1:95143890-95173889    | 282  | TMEM56   |
| chr16:69368375-69372355   | 29   | TERF2    |
| chr18:37066889-37084232   | 46   | KIAA1328 |
| chr2:171435082-171449957  | 14   | DCAF17   |
| chr18:58341037-58351045   | 11   | NEDD4L   |
| chr5:37302778-37303414    | 5    | NUP155   |
| chr9:41007439-41033022    | 3    | nogene   |
| chr3:129965700-129972108  | 48   | nogene   |
| chr12:27368261-27385560   | 30   | ARNTL2   |
| chr16:15483936-15515428   | 14   | C16orf45 |
| chr16:85633913-85634132   | 1198 | GSE1     |
| chr15:63747723-63756748   | 13   | HERC1    |
| chr11:108176245-108177090 | 198  | NPAT     |
| chr1:243270104-243308177  | 19   | SDCCAG8  |
| chrX:1435021-1439144      | 31   | ASMTL    |
| chr8:67045811-67047859    | 3    | COP55    |
| chr1:243613670-243695716  | 19   | AKT3     |
| chr5:126559239-126570859  | 19   | ALDH7A1  |
| chr2:120027589-120042110  | 36   | EPB41L5  |
| chr2:26364301-26383347    | 39   | EPT1     |
| chr6:154860737-154860998  | 77   | nogene   |
| chr6:53285909-53286315    | 13   | nogene   |
| chr6:73635381-73638499    | 2    | SLC17A5  |
| chr5:73773854-73795391    | 76   | ARHGEF28 |
| chr20:51669996-51671257   | 5    | ATP9A    |
| chr2:117995445-118008658  | 14   | CCDC93   |
| chr1:207757013-207767195  | 8    | CD46     |
| chr11:9160712-9193681     | 36   | DENND5A  |

|                           |     |          |
|---------------------------|-----|----------|
| chr12:101897862-101901433 | 36  | DRAM1    |
| chr21:37420298-37472880   | 265 | DYRK1A   |
| chr6:57924416-57930291    | 26  | GUSBP4   |
| chr12:82369448-82403130   | 1   | METTL25  |
| chr14:51489340-51491534   | 15  | nogene   |
| chrX:56014844-56024501    | 4   | nogene   |
| chr12:79817393-79822190   | 17  | PPP1R12A |
| chr8:42861744-42865489    | 6   | RNF170   |
| chr7:127701162-127707647  | 4   | SND1     |
| chr17:9674890-9680366     | 5   | USP43    |
| chr5:73840479-73852692    | 15  | ARHGEF28 |
| chrX:30665510-30677452    | 9   | GK       |
| chr2:105296355-105298705  | 60  | TGFBRAP1 |
| chr2:203380207-203402734  | 78  | ABI2     |
| chr9:96522505-96565512    | 3   | CDC14B   |
| chr9:36246030-36246482    | 32  | GNE      |
| chr3:37273535-37289291    | 12  | GOLGA4   |
| chr7:131387119-131445903  | 14  | MKLN1    |
| chr1:241896958-241920227  | 1   | nogene   |
| chr3:110461309-110502152  | 1   | nogene   |
| chr5:37314197-37328420    | 1   | NUP155   |
| chr7:105505954-105508544  | 12  | PUS7     |
| chr1:179347599-179350431  | 9   | SOAT1    |
| chr8:124508473-124522200  | 19  | TATDN1   |
| chr1:168291159-168300483  | 4   | TBX19    |
| chr6:75260823-75267748    | 6   | TMEM30A  |
| chr7:23342063-23351586    | 256 | IGF2BP3  |
| chr5:36953617-36962274    | 72  | NIPBL    |
| chr7:92117043-92131872    | 10  | CYP51A1  |
| chr1:212872677-212889257  | 12  | FLVCR1   |
| chr20:36656359-36666392   | 9   | NDRG3    |
| chr9:124301935-124339665  | 11  | NEK6     |
| chr11:74634582-74640841   | 16  | POLD3    |
| chr12:68654111-68657217   | 13  | RAP1B    |
| chr2:3545700-3552308      | 7   | RNASEH1  |
| chr16:2253303-2254063     | 29  | RNPS1    |
| chr11:4101992-4112062     | 41  | RRM1     |
| chr11:77740730-77764689   | 87  | RSF1     |
| chr1:112581991-112600848  | 13  | ST7L     |
| chr17:31200421-31219118   | 5   | NF1      |
| chr19:45698546-45698900   | 4   | QPCTL    |
| chr9:111533738-111534353  | 96  | ZNF483   |
| chr15:92924320-92927330   | 17  | CHD2     |

|                           |     |          |
|---------------------------|-----|----------|
| chr9:23762005-23765099    | 19  | ELAVL2   |
| chr16:74480240-74483124   | 14  | GLG1     |
| chr10:13170921-13172765   | 2   | MCM10    |
| chr12:76059797-76060279   | 46  | NAP1L1   |
| chr6:33697622-33710851    | 2   | nogene   |
| chr13:28628543-28636986   | 2   | nogene   |
| chr11:75413519-75414320   | 11  | nogene   |
| chr10:68487143-68506718   | 43  | SLC25A16 |
| chr8:102261914-102270183  | 26  | UBR5     |
| chr3:183752072-183762279  | 11  | YEATS2   |
| chr1:246435944-246441299  | 18  | nogene   |
| chr6:42615070-42635546    | 4   | UBR2     |
| chr6:99558496-99561681    | 20  | CCNC     |
| chr6:169582835-169662424  | 52  | WDR27    |
| chrX:152345580-152458262  | 11  | GABRA3   |
| chr1:205723925-205729621  | 56  | NUCKS1   |
| chr6:18255730-18258405    | 40  | DEK      |
| chr2:203208636-203209322  | 15  | NBEAL1   |
| chr3:134175608-134183071  | 12  | RYK      |
| chr20:46063359-46079453   | 4   | NCOA5    |
| chr7:158739022-158748280  | 20  | ESYT2    |
| chr6:169705132-169721111  | 3   | PHF10    |
| chr10:37833024-37856337   | 31  | ZNF248   |
| chr10:15821655-15843272   | 114 | FAM188A  |
| chr1:52396045-52397863    | 28  | ORC1     |
| chr13:30240459-30241086   | 8   | KATNAL1  |
| chr17:4049707-4051043     | 3   | ZZEF1    |
| chrX:119633359-119637195  | 2   | 6-Sep    |
| chr11:74132843-74161556   | 28  | C2CD3    |
| chr3:179413411-179419505  | 33  | GNB4     |
| chr1:235985378-235991058  | 16  | NID1     |
| chr2:61280243-61281242    | 5   | USP34    |
| chr2:227531090-227552117  | 14  | AGFG1    |
| chr18:45907957-45913828   | 16  | EPG5     |
| chr16:81854443-81870935   | 2   | PLCG2    |
| chr16:30961266-30963554   | 5   | SETD1A   |
| chr7:66079177-66080133    | 6   | nogene   |
| chr8:134608728-134610655  | 31  | ZFAT     |
| chr19:47725811-47726224   | 126 | EHD2     |
| chr10:114830851-114848737 | 59  | FAM160B1 |
| chr13:24490667-24498229   | 26  | PARP4    |
| chr11:34931403-34960518   | 3   | PDHX     |
| chr1:935771-939412        | 26  | SAMD11   |

|                           |     |           |
|---------------------------|-----|-----------|
| chr5:38510463-38530666    | 25  | LIFR      |
| chr1:44757555-44758140    | 256 | KIF2C     |
| chr4:128074459-128082305  | 75  | LARP1B    |
| chr17:51201591-51203925   | 2   | MBTD1     |
| chr10:118009075-118040565 | 1   | RAB11FIP2 |
| chr2:85349383-85351021    | 9   | RETSAT    |
| chr3:47706408-47745993    | 3   | SMARCC1   |
| chr10:92474840-92475994   | 12  | IDE       |
| chr17:28349082-28355876   | 2   | POLDIP2   |
| chr6:147260614-147291172  | 14  | STXBP5    |
| chr12:7432415-7436602     | 2   | CD163L1   |
| chrX:154030297-154032557  | 14  | MECP2     |
| chrX:68192918-68206673    | 14  | OPHN1     |
| chr3:196806578-196818156  | 16  | PAK2      |
| chr7:140041643-140058034  | 6   | PARP12    |
| chr6:2835855-2840594      | 1   | SERPINB1  |
| chr18:56923921-56962529   | 7   | WDR7      |
| chr9:123557569-123879021  | 6   | DENND1A   |
| chr5:677749-678064        | 59  | TPPP      |
| chr1:94455732-94475737    | 16  | ABCD3     |
| chr14:93257194-93263993   | 13  | BTBD7     |
| chr2:174915057-174952202  | 325 | CHN1      |
| chr12:48923781-48925111   | 3   | FKBP11    |
| chr3:136464880-136477412  | 16  | STAG1     |
| chr8:125102050-125127067  | 18  | NSMCE2    |
| chr10:119155061-119160969 | 6   | SFXN4     |
| chr4:147965023-147966839  | 63  | ARHGAP10  |
| chr3:172760155-172783909  | 17  | ECT2      |
| chr2:43918024-43925961    | 126 | LRPPRC    |
| chr4:189895531-189937333  | 9   | nogene    |
| chr3:197817175-197820430  | 27  | LRCH3     |
| chr7:158679959-158689953  | 33  | NCAPG2    |
| chr4:47744401-47807047    | 8   | CORIN     |
| chr12:110536923-110551968 | 43  | PPTC7     |
| chr8:103514017-103697296  | 12  | RIMS2     |
| chr14:52744851-52759754   | 2   | STYX      |
| chr22:41135812-41141222   | 13  | EP300     |
| chr12:112450317-112456063 | 4   | PTPN11    |
| chr22:33761370-33767719   | 32  | LARGE     |
| chr19:37246075-37246491   | 14  | nogene    |
| chr4:39898388-39902460    | 122 | PDS5A     |
| chr7:105462620-105495253  | 14  | PUS7      |
| chr15:40389505-40392023   | 2   | KNSTRN    |

|                           |     |              |
|---------------------------|-----|--------------|
| chr7:155737529-155745602  | 6   | RBM33        |
| chr5:168500590-168516950  | 12  | RARS         |
| chr1:224267003-224268133  | 24  | NVL          |
| chr9:85575314-85596449    | 8   | AGTPBP1      |
| chr3:52686768-52689206    | 18  | GNL3         |
| chrX:77870807-77879613    | 19  | MAGT1        |
| chr3:196067517-196077122  | 12  | TFRC         |
| chr7:23415247-23418824    | 37  | IGF2BP3      |
| chr1:158077990-158078507  | 14  | KIRREL       |
| chr13:20051432-20067390   | 20  | ZMYM2        |
| chr7:6187049-6190531      | 62  | CYTH3        |
| chr16:69136695-69150904   | 15  | CIRH1A       |
| chr15:24979535-24982437   | 3   | nogene       |
| chr4:2956669-2957740      | 40  | NOP14        |
| chr15:40641378-40650819   | 31  | nogene       |
| chr1:109336239-109345878  | 21  | SORT1        |
| chr12:56741434-56744123   | 12  | PRIM1        |
| chrX:19950752-19955566    | 16  | CXorf23      |
| chr19:48904346-48905885   | 2   | NUCB1        |
| chr1:42278347-42278672    | 19  | FOXJ3        |
| chr21:28162191-28163717   | 24  | LOC101927973 |
| chr17:56848695-56856665   | 118 | DGKE         |
| chr3:158658921-158666386  | 7   | GFM1         |
| chr7:26196400-26197732    | 9   | HNRNPA2B1    |
| chr3:170259968-170270561  | 4   | PRKCI        |
| chr17:39490556-39511630   | 11  | CDK12        |
| chr15:101217998-101235577 | 2   | CHSY1        |
| chr12:53016472-53028188   | 103 | EIF4B        |
| chr2:239236592-239354414  | 12  | HDAC4        |
| chr2:210104103-210154611  | 32  | KANSL1L      |
| chr11:12162078-12162419   | 2   | MICAL2       |
| chr19:6230594-6270759     | 18  | MLLT1        |
| chr5:16761463-16762637    | 12  | MYO10        |
| chr12:87648516-87715112   | 3   | nogene       |
| chr13:25312882-25315467   | 3   | NUPL1        |
| chr11:74285808-74289130   | 2   | P4HA3        |
| chr6:111172694-111177665  | 31  | SLC16A10     |
| chr15:42751973-42753247   | 2   | TTBK2        |
| chr18:12358669-12358943   | 0   | AFG3L2       |
| chr10:31831738-31861658   | 1   | ARHGAP12     |
| chr19:7462151-7464690     | 34  | ARHGEF18     |
| chr15:72686753-72731726   | 0   | BBS4         |
| chr12:4517060-4518880     | 63  | C12orf4      |

|                           |     |           |
|---------------------------|-----|-----------|
| chr11:74095227-74109152   | 0   | C2CD3     |
| chr15:40628069-40629371   | 3   | CASC5     |
| chr2:196656632-196669876  | 0   | CCDC150   |
| chr10:32565557-32635158   | 4   | CCDC7     |
| chr5:123545416-123575963  | 56  | CSNK1G3   |
| chr10:124989501-125039155 | 0   | CTBP2     |
| chr22:31758545-31765060   | 13  | DEPDC5    |
| chr1:62653724-62663130    | 13  | DOCK7     |
| chr18:49257009-49379758   | 25  | DYM       |
| chr11:103303092-103307831 | 0   | DYNC2H1   |
| chr3:5199591-5203149      | 3   | EDEM1     |
| chr17:79077429-79081073   | 27  | ENGASE    |
| chr5:112259228-112307490  | 4   | EPB41L4A  |
| chr9:95907077-95956013    | 0   | ERCC6L2   |
| chr1:92563641-92625934    | 0   | EVI5      |
| chr11:47734024-47736740   | 3   | FNBP4     |
| chr14:65561336-65561766   | 168 | FUT8      |
| chr9:86077411-86079341    | 24  | GOLM1     |
| chr5:141627892-141630125  | 2   | HDAC3     |
| chr10:67988662-68038169   | 0   | HERC4     |
| chr3:124769012-124848558  | 0   | ITGB5     |
| chr17:6628116-6635171     | 17  | KIAA0753  |
| chr2:61081451-61088468    | 4   | KIAA1841  |
| chr16:87726764-87762040   | 5   | KLHDC4    |
| chr18:6093354-6264038     | 0   | L3MBTL4   |
| chr15:42545076-42548456   | 0   | LRR57     |
| chr18:58741864-58745791   | 0   | MALT1     |
| chr4:139351190-139354098  | 13  | NAA15     |
| chrX:152635881-152639794  | 116 | nogene    |
| chr15:68068340-68068497   | 15  | nogene    |
| chr3:17622647-17733460    | 31  | nogene    |
| chr5:171024490-171034980  | 10  | nogene    |
| chr11:84902079-84903098   | 0   | nogene    |
| chr5:93553760-93563460    | 1   | NR2F1-AS1 |
| chr1:52383419-52393803    | 0   | ORC1      |
| chr13:100301459-100307260 | 0   | PCCA      |
| chr14:70976941-70988699   | 0   | PCNX      |
| chr1:28407409-28459258    | 2   | PHACTR4   |
| chrX:37386598-37426000    | 161 | PRRG1     |
| chr18:12718516-12724619   | 0   | PSMG2     |
| chr6:57193841-57210445    | 469 | RAB23     |
| chr11:73707419-73720899   | 556 | RAB6A     |
| chr1:174219124-174231355  | 10  | RABGAP1L  |



|                          |     |          |
|--------------------------|-----|----------|
| chr1:178808044-178821704 | 0   | RALGPS2  |
| chr17:1878992-1883944    | 4   | RPA1     |
| chr10:16752538-16764510  | 36  | RSU1     |
| chr14:30670255-30673997  | 4   | SCFD1    |
| chr12:51684173-51699791  | 0   | SCN8A    |
| chr17:80223179-80237594  | 0   | SLC26A11 |
| chr5:35628459-35649425   | 0   | SPEF2    |
| chr17:49611279-49613605  | 0   | SPOP     |
| chr5:33453288-33459861   | 4   | TARS     |
| chr10:94507266-94511654  | 9   | TBC1D12  |
| chr15:51766372-51808544  | 0   | TMOD2    |
| chr9:35295695-35295930   | 0   | UNC13B   |
| chr2:61220309-61223296   | 17  | USP34    |
| chr10:1084402-1086357    | 16  | WDR37    |
| chr20:21349388-21365704  | 18  | XRN2     |
| chr9:37260454-37305714   | 0   | ZCCHC7   |
| chr9:37126311-37127263   | 56  | ZCCHC7   |
| chr8:144777457-144778525 | 0   | ZNF34    |
| chr19:57819567-57839149  | 0   | ZNF587B  |
| chr15:72760406-72775097  | 176 | ADPGK    |
| chr2:235908737-235930923 | 34  | AGAP1    |
| chr7:99333324-99338285   | 13  | ARPC1A   |
| chr1:161846448-161863312 | 73  | ATF6     |
| chr2:233263129-233265143 | 2   | ATG16L1  |
| chr18:31630958-31638760  | 2   | B4GALT6  |
| chr12:24842081-24849949  | 16  | BCAT1    |
| chr21:39228499-39229436  | 64  | BRWD1    |
| chr14:93293857-93296157  | 239 | BTBD7    |
| chr5:37153739-37162566   | 6   | C5orf42  |
| chr11:95799231-95813589  | 29  | CEP57    |
| chr8:25407982-25408940   | 149 | DOCK5    |
| chr15:69210315-69261329  | 19  | GLCE     |
| chr3:185689354-185689627 | 23  | IGF2BP2  |
| chr19:49139667-49143004  | 1   | PPFIA3   |
| chr7:66775226-66805396   | 6   | RABGEF1  |
| chr1:168231513-168243069 | 37  | SFT2D2   |
| chr11:70659827-70698763  | 11  | SHANK2   |
| chr10:68487143-68503695  | 12  | SLC25A16 |
| chr9:123169901-123179227 | 11  | STRBP    |
| chr12:6333068-6334244    | 24  | TNFRSF1A |
| chr5:14304460-14330900   | 16  | TRIO     |
| chr2:61220309-61232532   | 2   | USP34    |
| chr2:159248371-159259843 | 4   | WDSUB1   |

|                           |     |          |
|---------------------------|-----|----------|
| chr1:35358924-35361789    | 378 | ZMYM4    |
| chr19:40336109-40336407   | 17  | C19orf47 |
| chr6:34646600-34649830    | 14  | C6orf106 |
| chr11:103303092-103399872 | 9   | DYNC2H1  |
| chr4:22364240-22402799    | 12  | ADGRA3   |
| chr8:67251298-67259926    | 9   | ARFGEF1  |
| chr2:224556294-224557856  | 21  | CUL3     |
| chr1:156785464-156785857  | 16  | nogene   |
| chr12:131764455-131778330 | 3   | SFSWAP   |
| chrX:155506897-155507134  | 2   | TMLHE    |
| chr5:65451474-65460338    | 274 | ADAMTS6  |
| chr11:103231259-103245374 | 1   | DYNC2H1  |
| chr3:44784844-44794426    | 70  | KIF15    |
| chr9:97645610-97653908    | 2   | NCBP1    |
| chr3:47736033-47772936    | 159 | SMARCC1  |
| chr17:37221723-37226452   | 14  | ACACA    |
| chr1:75739979-75750546    | 19  | ACADM    |
| chr12:48939654-48941188   | 562 | ARF3     |
| chrX:63655493-63678572    | 10  | ARHGEF9  |
| chr8:130168991-130187285  | 1   | ASAP1    |
| chr12:14423908-14438267   | 13  | ATF7IP   |
| chr18:57731626-57731829   | 54  | ATP8B1   |
| chr7:73469516-73470483    | 40  | BAZ1B    |
| chr12:101714089-101720254 | 27  | CHPT1    |
| chr3:33612000-33644903    | 3   | CLASP2   |
| chr5:180553385-180571432  | 3   | CNOT6    |
| chr17:17254858-17260474   | 3   | COPS3    |
| chr1:44308309-44319744    | 102 | ERI3     |
| chr9:5810010-5813035      | 2   | ERMP1    |
| chr14:35053277-35053451   | 38  | FAM177A1 |
| chr19:39883304-39896143   | 6   | FCGBP    |
| chrX:131783886-131785258  | 79  | FIRRE    |
| chr2:48359046-48366125    | 15  | FOXN2    |
| chrX:152189729-152208144  | 16  | GABRA3   |
| chr10:14848608-14855943   | 16  | HSPA14   |
| chr19:7184315-7184637     | 35  | INSR     |
| chr2:30459551-30568176    | 39  | LCLAT1   |
| chr12:12147365-12151038   | 6   | LRP6     |
| chr11:28211061-28296931   | 12  | METTL15  |
| chr12:78116771-78119945   | 3   | NAV3     |
| chr13:35040932-35045401   | 24  | NBEA     |
| chr4:102525511-102537956  | 327 | NFKB1    |
| chrX:100948917-100957528  | 1   | nogene   |

|                           |     |          |
|---------------------------|-----|----------|
| chr1:178123055-178125501  | 136 | nogene   |
| chr17:38777686-38786920   | 42  | PIP4K2B  |
| chr17:60623520-60656841   | 11  | PPM1D    |
| chr3:128795359-128798069  | 15  | RAB7A    |
| chr2:151414822-151416901  | 2   | RIF1     |
| chr4:109462900-109481781  | 16  | SEC24B   |
| chr19:40582350-40583717   | 35  | SHKBP1   |
| chr7:17821508-17840000    | 4   | SNX13    |
| chr17:60345480-60377292   | 12  | USP32    |
| chr17:59764970-59773885   | 77  | VMP1     |
| chr12:132933034-132945797 | 21  | ZNF605   |
| chr1:114733731-114738072  | 47  | CSDE1    |
| chr19:1555052-1556075     | 19  | nogene   |
| chr2:63933672-63984019    | 16  | VPS54    |
| chr22:42831548-42835493   | 14  | ARFGAP3  |
| chr17:48835322-48841887   | 13  | CALCOCO2 |
| chr2:61873001-61883548    | 38  | CCT4     |
| chr9:17330631-17342444    | 4   | CNTLN    |
| chr7:156966269-156967092  | 135 | NOM1     |
| chr11:3731390-3735324     | 33  | NUP98    |
| chr14:102662322-102681978 | 12  | RCOR1    |
| chr15:75859877-75883424   | 23  | UBE2Q2   |
| chr15:44322964-44332078   | 34  | CASC4    |
| chr11:46754887-46760784   | 19  | CKAP5    |
| chr14:88744022-88754671   | 13  | EML5     |
| chr13:30208576-30283791   | 97  | KATNAL1  |
| chr4:150914194-150916738  | 16  | LRBA     |
| chr6:43774340-43778918    | 42  | VEGFA    |
| chr5:138418952-138419232  | 2   | KDM3B    |
| chr3:184936245-184971752  | 115 | VPS8     |
| chr7:99385701-99391253    | 1   | ARPC1B   |
| chr7:32548846-32554596    | 2   | AVL9     |
| chr19:17276494-17276909   | 340 | BABAM1   |
| chr10:86875866-86892229   | 39  | BMPR1A   |
| chr19:13913167-13913638   | 25  | CC2D1A   |
| chr7:6416626-6416921      | 20  | DAGLB    |
| chr20:18412645-18415449   | 26  | DZANK1   |
| chr12:6974338-6975378     | 16  | EMG1     |
| chr19:14046153-14046618   | 50  | IL27RA   |
| chr17:57257465-57262192   | 1   | MSI2     |
| chr19:3558631-3559091     | 1   | nogene   |
| chr17:18865468-18882683   | 39  | PRPSAP2  |
| chr6:87541917-87569590    | 14  | RARS2    |

|                           |     |              |
|---------------------------|-----|--------------|
| chr20:37198396-37210165   | 3   | RPN2         |
| chr9:89455887-89479825    | 14  | SEMA4D       |
| chr15:70682757-70684446   | 1   | UACA         |
| chr7:157220688-157223351  | 101 | UBE3C        |
| chr10:133395712-133402773 | 264 | MTG1         |
| chr6:147260614-147267167  | 10  | STXBP5       |
| chr6:57190392-57210445    | 20  | RAB23        |
| chr5:132883339-132888160  | 1   | AFF4         |
| chr7:92221901-92222978    | 8   | KRIT1        |
| chr11:47628952-47631087   | 2   | MTCH2        |
| chr6:44932652-45106006    | 5   | SUPT3H       |
| chr2:201016990-201045593  | 18  | FAM126B      |
| chr20:49072285-49072697   | 18  | CSE1L        |
| chr1:61694696-61709437    | 7   | TM2D1        |
| chr6:13579450-13600949    | 10  | SIRT5        |
| chr7:30323641-30366295    | 24  | ZNRF2        |
| chr12:70278131-70319364   | 41  | CNOT2        |
| chr18:50918109-50932360   | 31  | ME2          |
| chr12:50701619-50702005   | 26  | nogene       |
| chr7:24804314-24820238    | 1   | OSBPL3       |
| chr8:47849153-47849503    | 2   | PRKDC        |
| chr4:1904215-1935262      | 9   | WHSC1        |
| chr12:95485878-95504161   | 40  | METAP2       |
| chr20:63922061-63922857   | 2   | nogene       |
| chr4:105424195-105438036  | 3   | PPA2         |
| chr9:134401631-134409119  | 4   | RXRA         |
| chr16:15879803-15884205   | 45  | FOPNL        |
| chr15:72007825-72027793   | 158 | MYO9A        |
| chr2:152144887-152148300  | 10  | STAM2        |
| chr3:197119409-197142768  | 34  | DLG1         |
| chr15:90217438-90221765   | 43  | SEMA4B       |
| chr10:27093348-27098326   | 7   | ANKRD26      |
| chr9:83335515-83389708    | 18  | FRMD3        |
| chr22:47686199-47738576   | 2   | LOC284930    |
| chr5:142345415-142353583  | 6   | LOC101926941 |
| chr11:68793314-68812576   | 5   | CPT1A        |
| chr5:31406852-31410887    | 4   | DROSHA       |
| chr6:104771192-104772074  | 6   | HACE1        |
| chr16:25132401-25134290   | 1   | LCMT1        |
| chr1:45824432-45829581    | 1   | MAST2        |
| chr11:47625673-47631711   | 3   | MTCH2        |
| chr11:126182836-126183087 | 58  | nogene       |
| chr1:26942656-26943065    | 18  | NUDC         |

|                           |     |          |
|---------------------------|-----|----------|
| chr2:218582970-218587695  | 17  | RQCD1    |
| chr22:40270121-40273600   | 11  | TNRC6B   |
| chr5:32390274-32397338    | 58  | ZFR      |
| chr9:77247258-77260224    | 19  | VPS13A   |
| chr2:69505568-69509460    | 13  | AAK1     |
| chr10:73378910-73380201   | 18  | ANXA7    |
| chr12:11722599-11752579   | 18  | ETV6     |
| chr15:40709024-40731344   | 58  | RAD51    |
| chr5:132927120-132937193  | 11  | AFF4     |
| chr6:24456497-24467274    | 1   | GPLD1    |
| chr4:159186641-159210583  | 24  | no gene  |
| chr20:35714184-35732135   | 12  | RBM39    |
| chr4:183693588-183701808  | 1   | TRAPPC11 |
| chr5:40728344-40771863    | 2   | TTC33    |
| chr15:63553714-63574403   | 21  | USP3     |
| chr7:6412810-6416921      | 128 | DAGLB    |
| chr1:180413365-180495525  | 12  | ACBD6    |
| chr11:103116569-103121496 | 16  | DYNC2H1  |
| chr7:6466070-6469754      | 38  | KDEL2    |
| chr16:74938149-74956610   | 16  | WDR59    |
| chr6:532468-576882        | 30  | EXOC2    |
| chr17:58955648-58972925   | 6   | PPM1E    |
| chr12:120199117-120199485 | 3   | RPLP0    |
| chr17:60345480-60380399   | 18  | USP32    |
| chr1:155239615-155240077  | 45  | GBA      |
| chr17:16158759-16171995   | 13  | NCOR1    |
| chr2:232014834-232030080  | 290 | DIS3L2   |
| chr1:227193785-227317246  | 7   | CDC42BPA |
| chr17:4242255-4242448     | 27  | ANKFY1   |
| chr8:94534838-94538346    | 2   | KIAA1429 |
| chr4:6372522-6381094      | 4   | PPP2R2C  |
| chr4:51874270-51899378    | 23  | DCUN1D4  |
| chr2:32439507-32453942    | 33  | BIRC6    |
| chr11:11998695-12002437   | 2   | DKK3     |
| chr1:38998170-39001106    | 39  | AKIRIN1  |
| chr14:76176622-76195972   | 55  | GPATCH2L |
| chr5:80678926-80752256    | 7   | MSH3     |
| chr12:26982772-26990627   | 5   | TM7SF3   |
| chr12:26995236-27003390   | 62  | TM7SF3   |
| chr10:102473569-102474012 | 21  | TMEM180  |
| chr3:183724418-183728851  | 5   | YEATS2   |
| chr9:69046384-69053260    | 18  | FXN      |
| chr19:6039979-6047504     | 2   | RFX2     |

|                           |     |             |
|---------------------------|-----|-------------|
| chr19:57861375-57863260   | 2   | nogene      |
| chr1:244989113-245017326  | 10  | EFCAB2      |
| chr19:49488836-49489355   | 29  | nogene      |
| chr8:98693136-98707311    | 18  | STK3        |
| chr4:2881897-2894731      | 8   | ADD1        |
| chr10:68465666-68468306   | 26  | DNA2        |
| chr7:30323641-30362456    | 2   | ZNRF2       |
| chr8:130060578-130061069  | 25  | ASAP1       |
| chr17:43099774-43115779   | 31  | BRCA1       |
| chr1:222990624-222992110  | 16  | DISP1       |
| chr16:47428803-47459175   | 52  | ITFG1       |
| chr1:226277774-226287797  | 12  | LIN9        |
| chr17:50742047-50743243   | 12  | nogene      |
| chr14:103702073-103704256 | 13  | nogene      |
| chr22:29606237-29606764   | 18  | nogene      |
| chr19:39417554-39418105   | 3   | PLEKHG2     |
| chr1:150949121-150949525  | 11  | SETDB1      |
| chr3:4410864-4420146      | 62  | SUMF1       |
| chr10:12081471-12120267   | 118 | DHTKD1      |
| chr7:2369471-2371849      | 25  | EIF3B       |
| chr22:40349831-40354327   | 41  | ADSL        |
| chr7:65964322-65970366    | 3   | GUSB        |
| chr15:28141431-28141846   | 14  | HERC2       |
| chr8:71962922-71973659    | 13  | MSC-AS1     |
| chr11:47422573-47422973   | 148 | PSMC3       |
| chr17:1091664-1100735     | 7   | ABR         |
| chr17:37149863-37162050   | 14  | ACACA       |
| chr1:35816881-35832185    | 0   | AGO4        |
| chr1:246885492-246888517  | 7   | AHCTF1      |
| chr20:58519503-58523806   | 2   | APCDD1L-AS1 |
| chr15:34915037-34932434   | 0   | AQR         |
| chr6:129611532-129642018  | 0   | ARHGAP18    |
| chr2:231206197-231296253  | 3   | ARMC9       |
| chr2:241651009-241659187  | 12  | ATG4B       |
| chr12:69589484-69592159   | 202 | CCT2        |
| chr17:63813227-63813454   | 0   | DDX42       |
| chr14:74885585-74894409   | 0   | DLST        |
| chr1:97573759-97595166    | 3   | DPYD        |
| chr17:47402131-47429961   | 3   | EFCAB13     |
| chr10:15796099-15847943   | 49  | FAM188A     |
| chr5:171891466-171997051  | 1   | FBXW11      |
| chr16:2896351-2899231     | 2   | FLYWCH2     |
| chr3:172352802-172353083  | 0   | FNDC3B      |

|                          |     |                |
|--------------------------|-----|----------------|
| chr6:41772634-41778176   | 1   | FRS3           |
| chr3:158654546-158682157 | 0   | GFM1           |
| chr7:18654762-18666476   | 0   | HDAC9          |
| chr14:31168297-31172122  | 21  | HECTD1         |
| chr15:28280067-28321464  | 2   | HERC2          |
| chr6:82181878-82196401   | 0   | IBTK           |
| chr20:34438473-34442303  | 12  | ITCH           |
| chr7:23123776-23144025   | 24  | KLHL7          |
| chr5:146160373-146172774 | 16  | LARS           |
| chr4:150588047-150817257 | 0   | LRBA           |
| chrX:77857356-77870925   | 0   | MAGT1          |
| chr17:51218929-51225209  | 26  | MBTD1          |
| chr3:179592643-179602797 | 16  | MRPL47         |
| chr10:68109604-68122340  | 18  | MYPN           |
| chrX:63259667-63315853   | 2   | nogene         |
| chr1:247920424-247923492 | 0   | nogene         |
| chr6:83017299-83037549   | 0   | nogene         |
| chr3:42087103-42087400   | 48  | nogene         |
| chr22:23923865-23924497  | 0   | nogene         |
| chr7:84793809-84889860   | 2   | nogene         |
| chr19:7908369-7909048    | 23  | nogene         |
| chr15:49318110-49328130  | 0   | nogene         |
| chr5:179676400-179677544 | 0   | nogene         |
| chr19:36154703-36154939  | 0   | nogene         |
| chr3:178908521-178921910 | 2   | nogene         |
| chr17:47601607-47605552  | 2   | NPEPPS         |
| chr22:30741160-30753153  | 0   | OSBP2          |
| chr1:149965776-149967521 | 0   | OTUD7B         |
| chrX:111123076-111152447 | 0   | PAK3           |
| chr11:74346731-74368575  | 0   | PGM2L1         |
| chr16:47497398-47547548  | 394 | PHKB           |
| chr4:184652022-184666064 | 0   | PRIMPOL        |
| chr8:140789473-140890769 | 202 | PTK2           |
| chr9:107306378-107318879 | 9   | RAD23B         |
| chr3:141529707-141577106 | 0   | RASA2          |
| chr1:8508626-8614686     | 42  | RERE           |
| chr4:82880798-82881940   | 0   | SEC31A         |
| chr15:43793083-43793689  | 0   | SERF2-C15ORF63 |
| chrX:19683822-19746441   | 0   | SH3KBP1        |
| chr22:23791755-23825415  | 0   | SMARCB1        |
| chr17:64598381-64626595  | 0   | SMURF2         |
| chr2:45579874-45585774   | 0   | SRBD1          |
| chr8:123077110-123093742 | 34  | TBC1D31        |

|                           |     |           |
|---------------------------|-----|-----------|
| chr14:90680471-90786328   | 0   | TTC7B     |
| chr1:52423867-52435465    | 0   | ZCCHC11   |
| chr19:52076043-52077084   | 35  | ZNF841    |
| chr7:2363631-2364529      | 309 | EIF3B     |
| chr17:9491828-9557528     | 16  | STX8      |
| chr20:31792734-31794548   | 68  | TPX2      |
| chr12:96311051-96334865   | 92  | CDK17     |
| chr22:38494629-38495046   | 7   | DDX17     |
| chr8:42950387-42997637    | 16  | HOOK3     |
| chr4:6804522-6824684      | 18  | KIAA0232  |
| chr10:119160438-119160705 | 17  | nogene    |
| chr13:95757643-95760798   | 16  | DNAJC3    |
| chr20:4932454-4970919     | 32  | SLC23A2   |
| chr6:85528261-85542043    | 12  | SNX14     |
| chr19:1218416-1223172     | 4   | STK11     |
| chr15:63532646-63574403   | 25  | USP3      |
| chr4:84896910-84912319    | 23  | WDFY3     |
| chr3:64018598-64022523    | 14  | PSMD6     |
| chr1:214464629-214464957  | 54  | PTPN14    |
| chr9:33060464-33068934    | 2   | SMU1      |
| chr14:69115667-69122360   | 14  | DCAF5     |
| chr7:32632542-32639365    | 20  | DPY19L1P1 |
| chr17:68209653-68210465   | 13  | nogene    |
| chr15:56156515-56162240   | 24  | nogene    |
| chr10:1072115-1080476     | 287 | WDR37     |
| chr2:32595033-32611582    | 25  | BIRC6     |
| chr16:20802795-20803670   | 3   | ERI2      |
| chr9:33592912-33594308    | 13  | nogene    |
| chr4:1184266-1184627      | 14  | nogene    |
| chr2:97265915-97268003    | 19  | nogene    |
| chr1:233177801-233208689  | 167 | PCNXL2    |
| chrX:19456912-19464406    | 104 | MAP3K15   |
| chr1:179347599-179351462  | 17  | SOAT1     |
| chr2:241581011-241606473  | 1   | THAP4     |
| chr8:53993667-54010492    | 278 | TCEA1     |
| chr7:103194976-103199965  | 6   | nogene    |
| chr21:34834409-34859578   | 119 | RUNX1     |
| chr1:224952669-224967583  | 27  | DNAH14    |
| chr7:6469595-6482589      | 25  | KDEL2     |
| chr21:36338771-36344707   | 597 | MORC3     |
| chr20:48951322-48953790   | 46  | ARFGEF2   |
| chr10:74977315-74989112   | 13  | KAT6B     |
| chr3:160521778-160531557  | 25  | KPNA4     |



|                           |     |              |
|---------------------------|-----|--------------|
| chr20:61997549-62014707   | 49  | TAF4         |
| chrX:77557450-77595785    | 28  | ATRX         |
| chr2:155698966-155704210  | 6   | nogene       |
| chr6:20479845-20481425    | 1   | E2F3         |
| chr18:36353568-36355645   | 13  | FHOD3        |
| chr19:8455404-8463686     | 136 | HNRNPM       |
| chr3:38252392-38252789    | 18  | OXSR1        |
| chr16:89098590-89114487   | 30  | ACSF3        |
| chr10:27935009-27944962   | 20  | ARMC4        |
| chr10:121836717-121870038 | 31  | ATE1         |
| chr12:111658735-111681835 | 2   | BRAP         |
| chr9:19286768-19305527    | 29  | DENND4C      |
| chrX:147932424-147932763  | 31  | FMR1         |
| chr15:78470531-78478397   | 2   | IREB2        |
| chrX:10566887-10567603    | 64  | MID1         |
| chr9:122291748-122322745  | 2   | MRRF         |
| chr14:31703116-31704138   | 54  | nogene       |
| chr2:158603069-158634289  | 110 | PKP4         |
| chr2:168063499-168075231  | 628 | STK39        |
| chr3:100294844-100296275  | 2   | TBC1D23      |
| chr19:37583970-37586745   | 36  | ZNF571       |
| chr4:88419301-88420428    | 21  | nogene       |
| chr17:41902489-41903901   | 8   | nogene       |
| chr20:36684412-36688784   | 40  | NDRG3        |
| chr2:120278617-120289757  | 53  | RALB         |
| chr1:171783739-171794527  | 11  | METTL13      |
| chr13:24441845-24452593   | 17  | PARP4        |
| chr17:38395308-38395998   | 6   | SOCS7        |
| chr5:33750336-33751548    | 5   | ADAMTS12     |
| chr7:92319329-92352642    | 17  | ANKIB1       |
| chr5:173163724-173164296  | 19  | BNIP1        |
| chr5:69300011-69311204    | 16  | CCDC125      |
| chr10:127106230-127127764 | 24  | DOCK1        |
| chr19:11245562-11245878   | 5   | DOCK6        |
| chr1:155214835-155235311  | 1   | GBA          |
| chr7:102399547-102407498  | 49  | LOC100630923 |
| chr21:14853273-14857708   | 102 | nogene       |
| chr17:41828789-41832477   | 34  | NT5C3B       |
| chr10:94258799-94259150   | 3   | PLCE1        |
| chr12:89491935-89497342   | 29  | POC1B        |
| chr16:11841694-11847806   | 51  | RSL1D1       |
| chr6:145934906-145935441  | 5   | SHPRH        |
| chr3:155828181-155834041  | 17  | SLC33A1      |

|                           |     |         |
|---------------------------|-----|---------|
| chr9:88415606-88426591    | 21  | SPIN1   |
| chr12:123586746-123590449 | 602 | TMED2   |
| chr2:46974972-46978907    | 67  | TTC7A   |
| chr1:154225083-154246375  | 3   | UBAP2L  |
| chr5:157751389-157755192  | 12  | LSM11   |
| chr12:131764175-131778330 | 1   | SFSWAP  |
| chr7:55982209-55997449    | 12  | GBAS    |
| chr19:10446217-10449150   | 23  | PDE4A   |
| chr17:783082-788132       | 17  | RNMTL1  |
| chr4:39075964-39103511    | 1   | KLHL5   |
| chr19:36761642-36762675   | 4   | ZNF850  |
| chr2:23798137-23834078    | 63  | ATAD2B  |
| chr22:19375630-19410778   | 3   | HIRA    |
| chr20:17943109-17954117   | 15  | SNX5    |
| chr4:169580841-169602678  | 26  | NEK1    |
| chr21:42883605-42886959   | 3   | nogene  |
| chr6:142166227-142170421  | 72  | VTA1    |
| chr12:57535055-57535845   | 10  | DCTN2   |
| chr18:21383509-21403994   | 20  | GREB1L  |
| chr5:177191883-177212195  | 30  | NSD1    |
| chr8:47785112-47798397    | 7   | PRKDC   |
| chr14:75745094-75752955   | 13  | TTLL5   |
| chr20:35347163-35384133   | 40  | UQCC1   |
| chr3:49324701-49327816    | 31  | USP4    |
| chr17:49732279-49732720   | 6   | FAM117A |
| chr18:58341037-58357252   | 4   | NEDD4L  |
| chr2:171082780-171117857  | 10  | TLK1    |
| chr3:183756527-183762279  | 68  | YEATS2  |
| chr3:52688108-52689206    | 25  | GNL3    |
| chr10:5773841-5786050     | 30  | GDI2    |
| chr2:61347869-61350693    | 27  | USP34   |
| chr9:33943419-33948587    | 14  | UBAP2   |
| chr21:39215236-39218660   | 33  | BRWD1   |
| chr15:77467094-77471814   | 80  | HMG20A  |
| chr10:45862985-45900426   | 150 | PARGP1  |
| chr7:67305986-67309715    | 32  | STAG3L4 |
| chr1:97691716-97740479    | 3   | DPYD    |
| chr1:39287285-39287562    | 2   | MACF1   |
| chr1:31915890-31919658    | 55  | PTP4A2  |
| chr8:140743229-140761262  | 1   | PTK2    |
| chr2:55254040-55262427    | 1   | MTIF2   |
| chr20:38524777-38532859   | 13  | RALGAPB |
| chr22:50703859-50715753   | 14  | SHANK3  |

|                           |     |                        |
|---------------------------|-----|------------------------|
| chr12:99772921-99782097   | 51  | ANKS1B                 |
| chr5:111344023-111394782  | 16  | CAMK4                  |
| chr10:15132816-15141557   | 3   | NMT2                   |
| chr11:74965033-74969699   | 185 | SPCS2                  |
| chr4:5849391-5861210      | 3   | CRMP1                  |
| chr7:123689041-123692867  | 3   | WASL                   |
| chr15:90439331-90456315   | 6   | IQGAP1                 |
| chr7:65752163-65756574    | 223 | CCT6P1                 |
| chr11:43798319-43840064   | 19  | HSD17B12               |
| chr20:35913248-35917662   | 3   | PHF20                  |
| chr5:179716104-179720560  | 4   | CANX                   |
| chr7:104188250-104204234  | 56  | ORC5                   |
| chr20:33679754-33680416   | 46  | E2F1                   |
| chr17:65743067-65750724   | 5   | CEP112                 |
| chr1:77801330-77875111    | 4   | FAM73A                 |
| chr16:48252130-48262872   | 11  | LONP2                  |
| chr6:112912876-112921171  | 8   | nogene                 |
| chr7:100351251-100355240  | 2   | STAG3L5P-PVRIG2P-PILRB |
| chr19:1430221-1432690     | 12  | DAZAP1                 |
| chr16:24952288-24970580   | 13  | ARHGAP17               |
| chr5:151786571-151804446  | 15  | G3BP1                  |
| chr20:25413789-25425327   | 156 | GIN51                  |
| chr1:223954476-223962708  | 34  | GTF2IP20               |
| chr7:8218304-8235940      | 4   | ICA1                   |
| chr4:82930942-82946474    | 13  | LIN54                  |
| chr6:150944485-150972058  | 3   | MTHFD1L                |
| chr2:63968956-63984019    | 11  | VPS54                  |
| chr20:19990005-19992299   | 34  | RIN2                   |
| chr22:41459940-41460487   | 6   | PHF5A                  |
| chr17:2700854-2701139     | 58  | CLUH                   |
| chr16:67626554-67629533   | 26  | CTCF                   |
| chr18:45907957-45912456   | 2   | EPG5                   |
| chr22:23683724-23695517   | 17  | GUSBP11                |
| chr12:62498918-62501698   | 32  | MON2                   |
| chr12:85410132-85424204   | 10  | nogene                 |
| chr15:30582893-30641617   | 19  | nogene                 |
| chr8:125357218-125357818  | 68  | NSMCE2                 |
| chr14:22909482-22911403   | 689 | RBM23                  |
| chr14:67685014-67692593   | 26  | RDH11                  |
| chr8:123077110-123105464  | 277 | TBC1D31                |
| chr10:45624582-45627105   | 8   | ZFAND4                 |
| chr12:122352725-122355312 | 4   | CLIP1                  |
| chr3:81288078-81325698    | 12  | nogene                 |

|                           |      |         |
|---------------------------|------|---------|
| chr3:52916149-52928341    | 1    | SFMBT1  |
| chr8:73527690-73552319    | 17   | STAU2   |
| chr9:109057190-109064567  | 75   | TMEM245 |
| chr19:1271328-1274440     | 9    | CIRBP   |
| chr4:36582656-36584796    | 24   | nogene  |
| chr12:45945248-45951727   | 4    | SCAF11  |
| chr3:72792915-72844423    | 23   | SHQ1    |
| chr6:110879986-110890356  | 29   | AMD1    |
| chr3:197980325-197996282  | 1    | LMLN    |
| chr3:49967469-49999513    | 23   | RBM6    |
| chr14:89924512-89932627   | 30   | EFCAB11 |
| chr6:32971594-32972927    | 17   | BRD2    |
| chr17:61712449-61712722   | 12   | nogene  |
| chr11:77991659-77992462   | 13   | nogene  |
| chr9:111570090-111586165  | 91   | PTGR1   |
| chr5:151060317-151063747  | 30   | TNIP1   |
| chr13:29530537-29536202   | 2186 | SLC7A1  |
| chr15:90713142-90715042   | 34   | nogene  |
| chr2:135932782-135961498  | 17   | DARS    |
| chr15:76283756-76292700   | 79   | ETFA    |
| chr20:51689063-51697482   | 33   | ATP9A   |
| chr12:96323947-96395917   | 13   | CDK17   |
| chr5:116091078-116134178  | 39   | COMMD10 |
| chr2:37019808-37020836    | 12   | HEATR5B |
| chr6:118826146-118856545  | 14   | MCM9    |
| chr14:37266937-37270525   | 13   | MIPOL1  |
| chr12:110485077-110490171 | 16   | FAM216A |
| chr7:2068666-2069338      | 13   | MAD1L1  |
| chr22:40953554-40955446   | 12   | RBX1    |
| chr20:48941198-48963898   | 5    | ARFGEF2 |
| chr12:79592610-79621207   | 12   | PAWR    |
| chr1:243645892-243843282  | 23   | AKT3    |
| chr12:103806321-103815121 | 27   | NT5DC3  |
| chr7:66797373-66805396    | 455  | RABGEF1 |
| chr15:68209636-68218650   | 28   | CLN6    |
| chr5:157803649-157817547  | 20   | CLINT1  |
| chrX:49115725-49117810    | 12   | GPKOW   |
| chr12:76805316-76822531   | 14   | ZDHHC17 |
| chr2:169872235-169878574  | 84   | UBR3    |
| chr19:47357865-47362693   | 18   | DHX34   |
| chr19:10143765-10146524   | 14   | DNMT1   |
| chr8:67299208-67301380    | 37   | ARFGEF1 |
| chr8:65622262-65627433    | 15   | ARMC1   |

|                           |     |          |
|---------------------------|-----|----------|
| chr21:33421479-33432871   | 29  | IFNGR2   |
| chr5:138372673-138379708  | 60  | KDM3B    |
| chr10:21681331-21713950   | 4   | MLLT10   |
| chr17:9162812-9182969     | 8   | NTN1     |
| chr13:19751270-19752316   | 21  | PSPC1    |
| chr1:43553491-43553941    | 43  | PTPRF    |
| chr18:12951854-12971251   | 27  | SEH1L    |
| chr15:75394679-75396496   | 15  | SIN3A    |
| chr12:46239678-46239893   | 7   | SLC38A1  |
| chr19:36089037-36089306   | 13  | WDR62    |
| chr11:74921213-74933872   | 2   | XRRA1    |
| chr1:213129526-213167973  | 1   | RPS6KC1  |
| chr19:9652952-9653878     | 16  | ZNF562   |
| chr10:119853049-119859884 | 17  | MCMBP    |
| chr7:33351218-33388144    | 30  | BBS9     |
| chr17:66139485-66183307   | 3   | CEP112   |
| chr4:118331715-118338314  | 455 | PRSS12   |
| chr12:100204939-100205744 | 11  | ACTR6    |
| chr16:69155870-69167185   | 217 | CIRH1A   |
| chr1:167974829-168004793  | 2   | DCAF6    |
| chr14:103448918-103457212 | 11  | MARK3    |
| chrX:21851508-21853503    | 136 | MBTPS2   |
| chr3:15411244-15414162    | 11  | METTL6   |
| chr8:97661071-97706750    | 14  | MTDH     |
| chr7:158671513-158675656  | 14  | NCAPG2   |
| chr13:72835242-72931267   | 8   | PIBF1    |
| chr9:111578795-111586165  | 130 | PTGR1    |
| chr19:5941620-5951596     | 3   | RANBP3   |
| chr3:158122102-158146775  | 26  | RSRC1    |
| chr18:2694526-2698041     | 16  | SMCHD1   |
| chr17:48118703-48119186   | 8   | SNX11    |
| chr8:73582769-73709162    | 2   | STAU2    |
| chr7:47344754-47346356    | 98  | TNS3     |
| chr14:90644047-90786328   | 16  | TTC7B    |
| chr4:148023262-148047051  | 60  | ARHGAP10 |
| chr11:36610080-36648155   | 17  | C11orf74 |
| chr4:67518155-67519502    | 19  | CENPC    |
| chr3:52693407-52694103    | 29  | GNL3     |
| chr4:87163478-87195690    | 15  | KLHL8    |
| chr18:9588088-9588853     | 67  | PPP4R1   |
| chr17:63604533-63606440   | 12  | TACO1    |
| chr2:271865-277372        | 1   | ACP1     |
| chr9:78241695-78243636    | 7   | CEP78    |

|                           |     |           |
|---------------------------|-----|-----------|
| chr1:26268482-26269614    | 67  | CEP85     |
| chr7:100687297-100687616  | 3   | GIGYF1    |
| chr2:197523623-197540437  | 2   | MOB4      |
| chr10:31373121-31387266   | 50  | nogene    |
| chr16:14552020-14593378   | 3   | PARN      |
| chr19:2213538-2214596     | 43  | DOT1L     |
| chr8:42950387-42974194    | 38  | HOOK3     |
| chr3:108554375-108560841  | 23  | KIAA1524  |
| chr4:3253206-3253482      | 13  | MSANTD1   |
| chr4:13460698-13479526    | 166 | RAB28     |
| chr1:63651668-63654466    | 13  | PGM1      |
| chr1:1669663-1734835      | 29  | SLC35E2B  |
| chr13:28662409-28672432   | 48  | POMP      |
| chr2:101281858-101294082  | 1   | RNF149    |
| chr21:43882503-43904019   | 3   | AGPAT3    |
| chr22:38495795-38499499   | 7   | DDX17     |
| chr14:61720381-61734285   | 2   | HIF1A     |
| chr7:79454885-79458999    | 2   | MAGI2-AS3 |
| chr10:49832802-49861663   | 3   | PARG      |
| chr19:418922-425231       | 7   | SHC2      |
| chr1:15872815-15876678    | 68  | SPEN      |
| chr16:72950468-72950965   | 32  | ZFHX3     |
| chr19:13927892-13928188   | 33  | CC2D1A    |
| chr18:74877196-74920692   | 25  | ZNF407    |
| chr7:102877466-102884312  | 233 | FBXL13    |
| chr1:39763091-39764817    | 8   | BMP8B     |
| chr12:14540763-14553412   | 23  | PLBD1     |
| chr2:85555483-85556260    | 14  | GGCX      |
| chr2:37236095-37237867    | 46  | NDUFAF7   |
| chr1:19890384-19907876    | 11  | OTUD3     |
| chr19:13923332-13923811   | 49  | CC2D1A    |
| chr5:168559031-168566266  | 36  | PANK3     |
| chr12:98595432-98595661   | 16  | SLC25A3   |
| chrX:23713134-23730564    | 18  | ACOT9     |
| chr10:110100624-110122292 | 11  | ADD3      |
| chr2:27058399-27059404    | 24  | AGBL5     |
| chr11:46433473-46508370   | 17  | AMBRA1    |
| chr15:68787412-68787919   | 1   | ANP32A    |
| chr5:142885297-142913293  | 24  | ARHGAP26  |
| chr12:26922615-26928905   | 16  | ASUN      |
| chr3:11331339-11348035    | 16  | ATG7      |
| chr2:32491424-32493667    | 35  | BIRC6     |
| chr2:27236283-27236830    | 12  | CAD       |

|                           |     |          |
|---------------------------|-----|----------|
| chr12:121268637-121274585 | 9   | CAMKK2   |
| chr6:89854816-89857199    | 32  | CASP8AP2 |
| chr5:96722638-96730860    | 21  | CAST     |
| chr20:33619516-33640531   | 2   | CBFA2T2  |
| chr2:36369107-36442735    | 43  | CRIM1    |
| chr12:113178976-113181058 | 1   | DDX54    |
| chr9:123452275-123457897  | 13  | DENND1A  |
| chr2:48346200-48362707    | 47  | FOXN2    |
| chr2:232787149-232796221  | 107 | GIGYF2   |
| chr3:149063430-149071657  | 19  | HLTF     |
| chr15:41016087-41027736   | 11  | INO80    |
| chr13:51383328-51395483   | 1   | INTS6    |
| chr1:32030297-32038619    | 48  | KHDRBS1  |
| chr7:105062163-105081797  | 84  | KMT2E    |
| chr7:74105874-74106243    | 2   | LIMK1    |
| chr16:48252130-48258740   | 16  | LONP2    |
| chr15:67563282-67586913   | 1   | MAP2K5   |
| chr14:21500494-21501903   | 61  | METTL3   |
| chr2:227328677-227330846  | 9   | MFF      |
| chr17:4547957-4550353     | 1   | MYBBP1A  |
| chr2:203056426-203057453  | 8   | NBEAL1   |
| chr3:38183002-38230430    | 13  | OXSR1    |
| chr15:85067013-85083644   | 146 | PDE8A    |
| chr4:39902346-39922748    | 2   | PDS5A    |
| chr6:136825213-136870003  | 2   | PEX7     |
| chr17:78414878-78419725   | 43  | PGS1     |
| chrX:15455847-15459740    | 18  | PIR      |
| chr2:53895006-53901559    | 11  | PSME4    |
| chr11:66639699-66644140   | 15  | RBM4     |
| chr17:1842802-1844686     | 167 | RPA1     |
| chr7:80789305-80805758    | 120 | SEMA3C   |
| chr10:100979847-100981229 | 6   | SEMA4G   |
| chr2:200419249-200419496  | 54  | SPATS2L  |
| chr11:64193077-64197974   | 35  | STIP1    |
| chr2:168129540-168182090  | 12  | STK39    |
| chr18:26274662-26275053   | 1   | TAF4B    |
| chr10:45982522-45988847   | 74  | TIMM23   |
| chr8:140275657-140291078  | 52  | TRAPPC9  |
| chr1:1256044-1257310      | 21  | UBE2J2   |
| chr10:11525385-11597717   | 15  | USP6NL   |
| chr16:31090774-31091342   | 596 | VKORC1   |
| chr8:99502835-99511512    | 65  | VPS13B   |
| chr14:96846094-96856586   | 32  | VRK1     |

|                           |     |             |
|---------------------------|-----|-------------|
| chr1:52974768-52988136    | 18  | SCP2        |
| chr11:108097635-108098529 | 19  | CUL5        |
| chr20:34489265-34492597   | 92  | ITCH        |
| chr19:6453980-6454717     | 6   | SLC25A23    |
| chr8:10207832-10319989    | 2   | MSRA        |
| chr4:70762518-70764576    | 31  | RUFY3       |
| chr8:47396375-47440542    | 33  | SPIDR       |
| chr9:131643238-131650949  | 92  | RAPGEF1     |
| chr1:77873000-77875111    | 35  | FAM73A      |
| chr20:21214534-21232830   | 31  | KIZ         |
| chr2:214752446-214792445  | 35  | BARD1       |
| chr6:149512154-149517450  | 4   | PPIL4       |
| chr7:55163732-55165437    | 9   | EGFR        |
| chr16:13242389-13244460   | 9   | nogene      |
| chr14:34575755-34609742   | 76  | SNX6        |
| chr11:43403997-43407577   | 25  | TTC17       |
| chr22:40907586-40914324   | 11  | XPNPEP3     |
| chr6:10697323-10702639    | 23  | PAK1IP1     |
| chr11:67393495-67393790   | 12  | RAD9A       |
| chr16:30716065-30716479   | 15  | SRCAP       |
| chr1:180824752-180825344  | 270 | XPR1        |
| chr2:111822421-111825855  | 19  | ANAPC1      |
| chr2:174846879-174878128  | 12  | CHN1        |
| chr5:131677702-131699002  | 33  | FNIP1       |
| chr10:124484138-124498128 | 4   | LHPP        |
| chr16:910930-954666       | 72  | LMF1        |
| chr4:150798080-150808398  | 64  | LRBA        |
| chr1:222651976-222652332  | 33  | MIA3        |
| chr1:5978269-5986327      | 21  | NPHP4       |
| chr1:43553491-43569778    | 105 | PTPRF       |
| chr15:44606024-44608605   | 2   | SPG11       |
| chr1:9355742-9356585      | 10  | SPSB1       |
| chr9:98099930-98100164    | 12  | TRIM14      |
| chr7:33349067-33388144    | 53  | BBS9        |
| chr10:49530719-49532978   | 1   | ERCC6-PGBD3 |
| chr5:133064979-133074126  | 64  | HSPA4       |
| chr4:3086938-3116263      | 41  | HTT         |
| chr20:35899369-35917662   | 2   | PHF20       |
| chr8:132811045-132817545  | 1   | PHF20L1     |
| chr8:140686631-140717709  | 24  | PTK2        |
| chr4:42018110-42023384    | 105 | SLC30A9     |
| chr6:35874232-35891013    | 43  | SRPK1       |
| chr6:24652982-24654530    | 4   | TDP2        |



|                           |      |          |
|---------------------------|------|----------|
| chr10:38012297-38017386   | 16   | ZNF33A   |
| chr17:49298105-49312042   | 1    | ZNF652   |
| chr2:43397970-43430302    | 45   | THADA    |
| chr12:103979830-103980962 | 9    | TDG      |
| chr5:65926581-65994864    | 29   | ERBB2IP  |
| chr1:50490587-50535457    | 33   | FAF1     |
| chr6:38078039-38084991    | 8    | nogene   |
| chr14:102084726-102085425 | 19   | nogene   |
| chr10:69185986-69191766   | 82   | SUPV3L1  |
| chr19:9656546-9660874     | 138  | ZNF562   |
| chr4:159304341-159314768  | 24   | RAPGEF2  |
| chr7:32833007-32834919    | 45   | nogene   |
| chr1:23055068-23057565    | 6    | KDM1A    |
| chr11:76458182-76464080   | 12   | C11orf30 |
| chr10:74394140-74600493   | 2    | ADK      |
| chr9:33528726-33536945    | 26   | ANKRD18B |
| chr11:32588593-32589641   | 40   | EIF3M    |
| chr1:155853275-155853806  | 1107 | GON4L    |
| chr11:123081862-123082661 | 13   | nogene   |
| chr9:97185441-97194840    | 29   | nogene   |
| chr15:71991102-72010447   | 25   | MYO9A    |
| chr16:70258032-70259186   | 12   | AARS     |
| chr17:37111530-37113265   | 3    | ACACA    |
| chr12:109249983-109254334 | 0    | ACACB    |
| chr8:39077227-39091346    | 12   | ADAM9    |
| chr5:65409518-65452918    | 0    | ADAMTS6  |
| chr17:78206910-78207257   | 0    | AFMID    |
| chr6:87675859-87681763    | 16   | AKIRIN2  |
| chr1:243545509-243695716  | 10   | AKT3     |
| chr5:115852978-115870128  | 23   | AP3S1    |
| chr21:25997359-26053348   | 0    | APP      |
| chr14:74683295-74701774   | 17   | AREL1    |
| chr4:147955315-147966839  | 27   | ARHGAP10 |
| chr10:31826303-31861658   | 12   | ARHGAP12 |
| chr13:111205288-111217880 | 9    | ARHGEF7  |
| chr6:157036834-157167185  | 2    | ARID1B   |
| chr3:48979481-48982979    | 0    | ARIH2    |
| chr2:9279316-9297445      | 260  | ASAP2    |
| chr12:14446987-14457295   | 26   | ATF7IP   |
| chr11:108319953-108321420 | 13   | ATM      |
| chr4:47535508-47546862    | 4    | ATP10D   |
| chr3:194438855-194448009  | 2    | ATP13A3  |
| chr18:79126266-79253541   | 11   | ATP9B    |

|                           |     |          |
|---------------------------|-----|----------|
| chr16:309972-347106       | 17  | AXIN1    |
| chr16:289439-293718       | 5   | AXIN1    |
| chr17:60679452-60689761   | 13  | BCAS3    |
| chr11:102350843-102368548 | 21  | BIRC2    |
| chr2:32467524-32467739    | 0   | BIRC6    |
| chr11:76513385-76528466   | 148 | C11orf30 |
| chr9:94923985-94955279    | 0   | C9orf3   |
| chr9:26861065-26886188    | 0   | CAAP1    |
| chr17:40161752-40162901   | 7   | CASC3    |
| chr6:110210706-110219869  | 0   | CDC40    |
| chr17:40300827-40301608   | 0   | CDC6     |
| chr2:37216983-37222563    | 0   | CEBPZ    |
| chr9:92379762-92380913    | 0   | CENPP    |
| chr1:111159379-111161296  | 13  | CEPT1    |
| chr3:113395749-113416627  | 17  | CFAP44   |
| chr19:4405911-4418076     | 8   | CHAF1A   |
| chr11:46750273-46751534   | 4   | CKAP5    |
| chr2:121503166-121530325  | 200 | CLASP1   |
| chr16:58520938-58525359   | 0   | CNOT1    |
| chr19:54142928-54144332   | 2   | CNOT3    |
| chr11:36276136-36280837   | 1   | COMMD9   |
| chr2:36476888-36479694    | 40  | CRIM1    |
| chr20:49088008-49091022   | 11  | CSE1L    |
| chr15:64203081-64207594   | 32  | CSNK1G1  |
| chr15:64251511-64300723   | 16  | CSNK1G1  |
| chr1:84563256-84570720    | 2   | CTBS     |
| chr16:67616744-67621591   | 20  | CTCF     |
| chr11:70417012-70431280   | 0   | CTTN     |
| chr11:70422939-70431280   | 27  | CTTN     |
| chr8:123022683-123030716  | 12  | DERL1    |
| chr22:19064847-19089490   | 0   | DGCR2    |
| chr22:19056985-19089490   | 0   | DGCR2    |
| chr7:157358546-157410001  | 0   | DNAJB6   |
| chr19:10775702-10777216   | 2   | DNM2     |
| chr14:72714422-72771893   | 11  | DPF3     |
| chr15:65463760-65480399   | 11  | DPP8     |
| chr7:34966893-34989941    | 3   | DPY19L1  |
| chr1:97234851-97248050    | 0   | DPYD     |
| chr9:137815946-137818138  | 14  | EHMT1    |
| chr22:37855564-37863345   | 0   | EIF3L    |
| chr6:53275089-53295707    | 11  | ELOVL5   |
| chr14:88754511-88754671   | 14  | EML5     |
| chr17:19309884-19329647   | 55  | EPN2     |

|                           |     |          |
|---------------------------|-----|----------|
| chr12:1289851-1351501     | 0   | ERC1     |
| chr7:158749648-158798076  | 2   | ESYT2    |
| chr7:148832633-148847305  | 139 | EZH2     |
| chr7:22983943-22991139    | 65  | FAM126A  |
| chr5:10140030-10227647    | 0   | FAM173B  |
| chr3:10032831-10036339    | 43  | FANCD2   |
| chr7:102813276-102931933  | 0   | FBXL13   |
| chr12:48923781-48926223   | 0   | FKBP11   |
| chr1:99740792-99742273    | 0   | FRRS1    |
| chr9:105484380-105539351  | 4   | FSD1L    |
| chr5:154323781-154329738  | 0   | GALNT10  |
| chr1:117902616-117918736  | 0   | GDAP2    |
| chr5:103096540-103097781  | 60  | GIN1     |
| chr3:142171418-142177576  | 0   | GK5      |
| chr6:1959866-2117556      | 21  | GMDS     |
| chr2:144208602-144248697  | 1   | GTDC1    |
| chr22:23683724-23714317   | 0   | GUSBP11  |
| chr1:108650210-108659962  | 11  | HENMT1   |
| chr8:28963810-28980156    | 20  | HMBOX1   |
| chr1:20749722-20749975    | 36  | HP1BP3   |
| chr10:119781634-119811955 | 0   | INPP5F   |
| chr6:33688238-33688431    | 0   | ITPR3    |
| chr21:33750142-33766012   | 6   | ITSN1    |
| chr6:73223698-73224348    | 0   | KHDC1L   |
| chr7:152251938-152273867  | 4   | KMT2C    |
| chr4:128074459-128091144  | 9   | LARP1B   |
| chr19:11100222-11107514   | 4   | LDLR     |
| chr19:54458313-54458521   | 27  | LENG8    |
| chr4:150806270-150817257  | 8   | LRBA     |
| chr3:197847408-197865471  | 1   | LRCH3    |
| chr7:134191654-134221918  | 11  | LRGUK    |
| chr8:91102218-91133305    | 6   | LRRC69   |
| chr4:102722870-102723967  | 0   | MANBA    |
| chr15:67600684-67658614   | 13  | MAP2K5   |
| chr2:101864929-101870415  | 0   | MAP4K4   |
| chr5:139307238-139308327  | 46  | MATR3    |
| chr6:167870382-167880517  | 14  | MLLT4    |
| chrX:106980890-106985250  | 120 | MORC4    |
| chr12:123218375-123223127 | 13  | MPHOSPH9 |
| chr1:167772274-167776166  | 145 | MPZL1    |
| chr17:40126182-40126406   | 26  | MSL1     |
| chrX:150727214-150737448  | 34  | MTMR1    |
| chr8:66572481-66573506    | 28  | MYBL1    |

|                           |     |         |
|---------------------------|-----|---------|
| chr20:23390208-23403072   | 0   | NAPB    |
| chr2:15488893-15558634    | 3   | NBAS    |
| chr8:89980733-89982855    | 1   | NBN     |
| chr12:124426621-124430787 | 13  | NCOR2   |
| chr11:67608551-67609635   | 64  | NDUFV1  |
| chr2:69415184-69423717    | 0   | NFU1    |
| chr3:23900807-23911450    | 57  | NKIRAS1 |
| chr1:45689163-45689588    | 16  | nogene  |
| chr12:109106724-109107359 | 0   | nogene  |
| chr12:85342471-85424204   | 10  | nogene  |
| chr2:39179186-39229588    | 7   | nogene  |
| chr7:2254251-2254601      | 0   | nogene  |
| chr4:84879405-84898597    | 11  | nogene  |
| chr5:146237918-146238273  | 15  | nogene  |
| chr22:28514756-28545577   | 12  | nogene  |
| chr5:172244959-172245498  | 0   | nogene  |
| chr3:67094831-67096603    | 12  | nogene  |
| chr12:1506066-1512004     | 0   | nogene  |
| chr7:66889134-66889521    | 2   | nogene  |
| chr6:141882660-141910011  | 0   | nogene  |
| chr13:26592428-26593722   | 0   | nogene  |
| chr8:125147080-125195272  | 28  | nogene  |
| chr14:34647791-34648139   | 19  | nogene  |
| chr1:26261039-26261205    | 17  | nogene  |
| chr12:102324786-102330442 | 0   | nogene  |
| chr1:222594235-222599969  | 0   | nogene  |
| chr22:42149278-42153200   | 0   | nogene  |
| chr14:55354500-55355222   | 25  | nogene  |
| chr1:151202704-151203301  | 12  | nogene  |
| chr6:2283498-2283763      | 3   | nogene  |
| chr10:34306571-34306996   | 20  | nogene  |
| chr22:17705180-17705392   | 11  | nogene  |
| chr17:66327827-66328092   | 0   | nogene  |
| chr22:20993105-20993319   | 0   | nogene  |
| chr6:34606629-34646792    | 0   | nogene  |
| chr16:72308055-72369679   | 0   | nogene  |
| chr10:123361318-123389292 | 0   | nogene  |
| chr1:200364201-200374246  | 0   | nogene  |
| chrX:23700354-23700851    | 0   | nogene  |
| chr8:124492205-124492560  | 14  | nogene  |
| chr12:6936921-6937167     | 0   | nogene  |
| chr9:130204977-130205447  | 0   | nogene  |
| chr1:5961793-5986327      | 252 | NPHP4   |

|                           |     |          |
|---------------------------|-----|----------|
| chr7:33021271-33024108    | 0   | NT5C3A   |
| chr7:135592986-135594729  | 18  | NUP205   |
| chr1:154046068-154061674  | 0   | NUP210L  |
| chr17:75231339-75231979   | 0   | NUP85    |
| chr16:46693092-46696085   | 0   | ORC6     |
| chr22:42890946-42893613   | 2   | PACSIN2  |
| chr5:103019789-103028238  | 0   | PAM      |
| chr5:79645122-79669028    | 19  | PAPD4    |
| chr14:96520054-96521072   | 102 | PAPOLA   |
| chr11:12473744-12477949   | 25  | PARVA    |
| chr3:101579841-101585511  | 2   | PCNP     |
| chr2:10784933-10793202    | 0   | PDIA6    |
| chr10:95238567-95247366   | 0   | PDLIM1   |
| chr15:77133004-77133750   | 45  | PEAK1    |
| chr20:35842572-35858381   | 40  | PHF20    |
| chr17:28559575-28560191   | 0   | PIGS     |
| chr12:57594024-57601636   | 4   | PIP4K2C  |
| chr3:146104278-146124229  | 0   | PLOD2    |
| chr12:89459637-89472275   | 178 | POC1B    |
| chr14:103784794-103797518 | 17  | PPP1R13B |
| chr2:37274420-37293271    | 0   | PRKD3    |
| chr16:68321425-68329174   | 14  | PRMT7    |
| chr17:18911102-18918387   | 0   | PRPSAP2  |
| chr1:171587647-171588505  | 0   | PRRC2C   |
| chr12:121899633-121903107 | 4   | PSMD9    |
| chr8:140818276-140925749  | 87  | PTK2     |
| chr3:61748877-61769416    | 14  | PTPRG    |
| chr4:13425109-13460828    | 14  | RAB28    |
| chr9:123065347-123076762  | 3   | RABGAP1  |
| chr7:66783671-66799414    | 12  | RABGEF1  |
| chr5:171221757-171242820  | 26  | RANBP17  |
| chr5:131548046-131638060  | 2   | RAPGEF6  |
| chr6:87530783-87541994    | 0   | RARS2    |
| chr1:32668224-32680614    | 7   | RBBP4    |
| chr11:114402827-114405799 | 0   | RBM7     |
| chr17:32173830-32199031   | 12  | RHOT1    |
| chr5:38971876-38978650    | 6   | RICTOR   |
| chr15:59030803-59076215   | 10  | RNF111   |
| chr3:196471639-196475312  | 11  | RNF168   |
| chr7:5739275-5741815      | 144 | RNF216   |
| chr6:125045210-125058106  | 71  | RNF217   |
| chr12:56210296-56210568   | 16  | RNF41    |
| chr6:88844356-88891915    | 49  | RNGTT    |

|                           |     |         |
|---------------------------|-----|---------|
| chr17:281767-327579       | 36  | RPH3AL  |
| chr3:134173115-134195182  | 2   | RYK     |
| chr2:199368604-199381820  | 62  | SATB2   |
| chr3:47435007-47443064    | 0   | SCAP    |
| chr1:41142877-41143112    | 14  | SCMH1   |
| chr7:80798091-80810701    | 27  | SEMA3C  |
| chr10:50340386-50344345   | 25  | SGMS1   |
| chr9:105273496-105361330  | 0   | SLC44A1 |
| chr3:27411641-27434104    | 5   | SLC4A7  |
| chr1:44008352-44008623    | 24  | SLC6A9  |
| chr13:29517572-29517790   | 15  | SLC7A1  |
| chr7:2269558-2278305      | 10  | SNX8    |
| chr1:109350928-109355469  | 11  | SORT1   |
| chr4:122979231-123057288  | 2   | SPATA5  |
| chr17:20204332-20232414   | 0   | SPECC1  |
| chr8:125003175-125009343  | 0   | SQLE    |
| chr4:56474053-56474391    | 19  | SRP72   |
| chr2:168063499-168140758  | 2   | STK39   |
| chr1:36361220-36362656    | 137 | STK40   |
| chr4:98109192-98134459    | 25  | STPG2   |
| chr16:31034012-31039651   | 0   | STX4    |
| chr10:102592581-102599544 | 18  | SUFU    |
| chr9:112124256-112157613  | 4   | SUSD1   |
| chr17:37437737-37444768   | 34  | TADA2A  |
| chr2:9882705-9919820      | 11  | TAF1B   |
| chr16:69022827-69040421   | 12  | TANGO6  |
| chr1:234420701-234430301  | 0   | TARBP1  |
| chr20:13616856-13630152   | 11  | TASP1   |
| chr3:10270130-10271015    | 6   | TATDN2  |
| chr3:100297922-100302237  | 1   | TBC1D23 |
| chr8:123120054-123126687  | 0   | TBC1D31 |
| chr3:196062581-196077122  | 0   | TFRC    |
| chr16:66517135-66517877   | 3   | TK2     |
| chr15:79321977-79411640   | 0   | TMED3   |
| chr4:38986335-39025726    | 0   | TMEM156 |
| chr15:51900154-51902036   | 28  | TMOD3   |
| chr1:223789007-223796590  | 0   | TP53BP2 |
| chr20:63869295-63875875   | 11  | TPD52L2 |
| chr19:58548987-58549240   | 0   | TRIM28  |
| chr10:114959725-114974385 | 15  | TRUB1   |
| chr3:150408179-150411308  | 0   | TSC22D2 |
| chr5:40746797-40747019    | 0   | TTC33   |
| chr18:24053313-24083081   | 0   | TTC39C  |

|                           |     |               |
|---------------------------|-----|---------------|
| chr19:34433347-34438766   | 11  | UBA2          |
| chr1:10072027-10072214    | 0   | UBE4B         |
| chr5:176943334-176951577  | 292 | UIMC1         |
| chr10:11956319-11964125   | 0   | UPF2          |
| chr20:35374183-35384133   | 37  | UQCC1         |
| chr2:61378362-61406128    | 0   | USP34         |
| chr1:21680807-21695221    | 17  | USP48         |
| chr17:8161607-8162369     | 0   | VAMP2         |
| chrX:155889457-155900587  | 36  | VAMP7         |
| chr17:59735337-59738947   | 0   | VMP1          |
| chr8:99501686-99521010    | 18  | VPS13B        |
| chr13:41575739-41605276   | 0   | VWA8          |
| chr4:84879405-84932363    | 15  | WDFY3         |
| chr2:19935470-19953978    | 0   | WDR35         |
| chr2:28912589-28929710    | 0   | WDR43         |
| chr16:69786995-69799295   | 26  | WWP2          |
| chr8:21966856-21976521    | 0   | XPO7          |
| chr11:74848114-74863021   | 0   | XRRA1         |
| chr11:102205892-102223752 | 13  | YAP1          |
| chr3:114380216-114500391  | 14  | ZBTB20        |
| chr19:47089966-47094608   | 0   | ZC3H4         |
| chr6:157628348-157653627  | 15  | ZDHHC14       |
| chr19:36360434-36362238   | 0   | ZFP14         |
| chr11:65085114-65087433   | 0   | ZFPL1         |
| chr7:6697338-6697811      | 95  | ZNF12         |
| chr18:76878008-76899222   | 0   | ZNF236        |
| chr9:111527267-111534353  | 145 | ZNF483        |
| chr19:9355656-9364948     | 13  | ZNF559-ZNF177 |
| chr2:71396140-71406262    | 9   | ZNF638        |
| chr19:36762304-36762675   | 10  | ZNF850        |
| chr12:133120287-133122024 | 0   | ZNF891        |
| chr3:5172149-5172740      | 16  | ARL8B         |
| chr7:152220522-152238826  | 242 | KMT2C         |
| chr6:10931439-10956242    | 4   | SYCP2L        |
| chr21:29351633-29411624   | 19  | BACH1         |
| chr7:102822039-102832974  | 1   | FBXL13        |
| chr12:116985205-117010450 | 32  | FBXW8         |
| chr6:33655765-33659549    | 1   | ITPR3         |
| chr16:27213584-27215008   | 63  | KDM8          |
| chr5:141494806-141505481  | 2   | PCDHGA6       |
| chr11:17959469-18010139   | 70  | SERGEF        |
| chr14:52997669-53043755   | 13  | nogene        |
| chr6:99545111-99562948    | 2   | CCNC          |

|                           |     |           |
|---------------------------|-----|-----------|
| chr8:27294079-27298559    | 7   | TRIM35    |
| chr7:2239417-2239707      | 7   | FTSJ2     |
| chr16:18782780-18783102   | 2   | RPS15A    |
| chr1:100439931-100468094  | 11  | CDC14A    |
| chr4:139342825-139344339  | 102 | NAA15     |
| chr6:132463992-132472375  | 11  | STX7      |
| chr5:126552020-126570859  | 11  | ALDH7A1   |
| chr10:12081471-12087729   | 18  | DHTKD1    |
| chr22:31458474-31463133   | 11  | EIF4ENIF1 |
| chr12:112239051-112240027 | 10  | HECTD4    |
| chr17:8520877-8521285     | 11  | MYH10     |
| chr3:171708754-171726076  | 2   | PLD1      |
| chr11:107803000-107806876 | 67  | SLC35F2   |
| chr8:123126055-123126687  | 11  | TBC1D31   |
| chr21:44037791-44052476   | 1   | TRAPPC10  |
| chr17:59031895-59047819   | 5   | TRIM37    |
| chr6:42644213-42650386    | 1   | UBR2      |
| chr3:196391812-196407393  | 126 | UBXN7     |
| chr4:84894824-84932363    | 1   | WDFY3     |
| chr1:156976982-156980486  | 15  | ARHGEF11  |
| chr17:4982756-4986286     | 20  | CAMTA2    |
| chr16:3504719-3508468     | 2   | CLUAP1    |
| chr22:46626750-46637960   | 69  | GRAMD4    |
| chr7:66382236-66390250    | 4   | LINC00174 |
| chr6:167870382-167898467  | 17  | MLLT4     |
| chr16:30580732-30580974   | 16  | nogene    |
| chr3:136316940-136329984  | 5   | PCCB      |
| chr8:15623079-15662296    | 18  | TUSC3     |
| chr8:42401787-42403461    | 141 | VDAC3     |
| chr2:61490641-61493053    | 20  | XPO1      |
| chr18:21383509-21384403   | 15  | GREB1L    |
| chr17:69273958-69284072   | 68  | ABCA5     |
| chr2:38309378-38319019    | 78  | ATL2      |
| chr21:39224407-39225197   | 7   | BRWD1     |
| chr16:58599235-58601867   | 1   | CNOT1     |
| chr15:66306896-66308844   | 12  | DIS3L     |
| chr17:39708320-39710481   | 163 | ERBB2     |
| chr7:55982209-55994988    | 8   | GBAS      |
| chr1:93894613-93901669    | 262 | GCLM      |
| chr4:44717112-44722242    | 20  | GNPDA2    |
| chr4:88649839-88658491    | 32  | HERC3     |
| chr18:6982496-7002385     | 1   | LAMA1     |
| chr3:16286323-16303592    | 29  | nogene    |



|                           |     |           |
|---------------------------|-----|-----------|
| chr2:200933875-200937966  | 4   | ORC2      |
| chr7:77768660-77773314    | 3   | RSBN1L    |
| chr12:813641-830160       | 118 | WNK1      |
| chr17:4066446-4086655     | 12  | ZZEF1     |
| chr16:66725827-66729099   | 63  | DYNC1LI2  |
| chr1:155795049-155827028  | 4   | GON4L     |
| chr11:78469246-78493195   | 112 | NARS2     |
| chr5:14487463-14488260    | 17  | TRIO      |
| chr12:104318912-104327671 | 19  | TXNRD1    |
| chr2:45476992-45553730    | 23  | SRBD1     |
| chr16:71678754-71681905   | 64  | PHLPP2    |
| chr2:32597750-32607643    | 2   | BIRC6     |
| chr5:69561033-69562042    | 23  | nogene    |
| chr3:144237757-144270349  | 35  | nogene    |
| chr12:124912962-124913190 | 710 | nogene    |
| chr10:119577079-119580010 | 2   | TIAL1     |
| chr19:52574076-52576021   | 7   | ZNF701    |
| chrX:68052539-68064177    | 20  | OPHN1     |
| chr20:33623114-33625017   | 29  | CBFA2T2   |
| chr1:59321535-59346398    | 118 | FGGY      |
| chr16:72249162-72349206   | 1   | LINC01572 |
| chr2:95150196-95159373    | 12  | nogene    |
| chr16:47463881-47596531   | 1   | PHKB      |
| chr20:49849578-49855581   | 33  | SLC9A8    |
| chr6:85530191-85536924    | 1   | SNX14     |
| chrX:9501779-9654322      | 1   | TBL1X     |
| chr2:43578512-43590954    | 93  | THADA     |
| chr16:84744632-84745673   | 3   | USP10     |
| chr6:24412221-24418578    | 4   | MRS2      |
| chr18:37066867-37084232   | 12  | nogene    |
| chr2:183128286-183130545  | 176 | NUP35     |
| chr12:128799258-128815070 | 38  | SLC15A4   |
| chr6:24502522-24522925    | 37  | ALDH5A1   |
| chr17:50990449-50993935   | 10  | SPAG9     |
| chr11:77938650-77981576   | 33  | INTS4     |
| chr20:50902016-50904849   | 3   | ADNP      |
| chr9:109093474-109108570  | 32  | TMEM245   |
| chr14:92007639-92011072   | 26  | TRIP11    |
| chr5:83195769-83204921    | 7   | XRCC4     |
| chr3:142355400-142370620  | 2   | XRN1      |
| chr2:175093060-175121540  | 43  | ATF2      |
| chr9:95978060-96012357    | 21  | ERCC6L2   |
| chr8:33388962-33389798    | 26  | FUT10     |

|                           |     |         |
|---------------------------|-----|---------|
| chr15:34382796-34383053   | 34  | GOLGA8A |
| chr5:119506817-119515046  | 57  | HSD17B4 |
| chr1:117402185-117442325  | 732 | MAN1A2  |
| chr8:97661071-97689103    | 3   | MTDH    |
| chr4:168890921-168916027  | 27  | PALLD   |
| chr20:64010199-64011503   | 3   | PRPF6   |
| chr1:10117458-10135186    | 2   | UBE4B   |
| chr21:39200218-39202545   | 11  | BRWD1   |
| chr11:119284968-119285566 | 173 | CBL     |
| chr9:95107065-95111637    | 12  | FANCC   |
| chr10:13666096-13670528   | 11  | FRMD4A  |
| chr16:50068779-50086351   | 11  | HEATR3  |
| chr5:5441111-5447897      | 2   | ICE1    |
| chr10:132690391-132710456 | 105 | INPP5A  |
| chr13:101567698-101583356 | 11  | ITGBL1  |
| chr21:36333645-36338921   | 19  | MORC3   |
| chr17:36512657-36515990   | 1   | MYO19   |
| chr12:112075677-112093136 | 29  | NAA25   |
| chr17:58696692-58720812   | 2   | RAD51C  |
| chr17:20096630-20110562   | 14  | SPECC1  |
| chr9:121989194-121989770  | 58  | TLL1    |
| chr8:99134631-99193057    | 37  | VPS13B  |
| chr1:247138715-247159813  | 122 | ZNF124  |
| chr1:155438326-155462599  | 39  | ASH1L   |
| chr8:61618977-61653660    | 189 | ASPH    |
| chr5:179705678-179708380  | 18  | CANX    |
| chr22:37495516-37497178   | 29  | CARD10  |
| chrX:131749305-131756709  | 18  | FIRRE   |
| chr5:126469676-126477787  | 3   | GRAMD3  |
| chr2:31917925-31920910    | 60  | MEMO1   |
| chr7:128577952-128638897  | 12  | nogene  |
| chr17:78400713-78401106   | 12  | nogene  |
| chr17:66513335-66514466   | 5   | nogene  |
| chr3:134207471-134222539  | 19  | RYK     |
| chr2:101050400-101059539  | 12  | TBC1D8  |
| chr12:82965023-82986046   | 15  | TMTC2   |
| chr10:68338502-68341680   | 11  | HNRNPH3 |
| chr4:40144631-40154267    | 16  | N4BP2   |
| chr12:11047019-11133367   | 15  | PRH1    |
| chr12:6749847-6750766     | 107 | MLF2    |
| chr20:3854557-3857809     | 8   | MAVS    |
| chr20:35938696-35941047   | 2   | PHF20   |
| chr14:77720710-77723277   | 14  | SNW1    |

|                           |     |           |
|---------------------------|-----|-----------|
| chr1:35415465-35415714    | 4   | ZMYM4     |
| chr17:17866295-17907531   | 14  | TOM1L2    |
| chr1:179337836-179342943  | 28  | SOAT1     |
| chr20:48953555-48969331   | 1   | ARFGEF2   |
| chr10:27542752-27578713   | 3   | nogene    |
| chr22:41137652-41141222   | 15  | EP300     |
| chr14:23322180-23324289   | 7   | PABPN1    |
| chr7:579255-711527        | 12  | PRKAR1B   |
| chr3:31876432-31879830    | 141 | OSBPL10   |
| chr14:68115818-68118479   | 33  | nogene    |
| chrX:155506897-155524632  | 24  | TMLHE     |
| chr6:57152220-57161152    | 70  | ZNF451    |
| chr7:141601204-141621801  | 15  | AGK       |
| chr5:82164398-82178587    | 55  | ATG10     |
| chr11:116762552-116765446 | 2   | BUD13     |
| chr21:41912331-41922085   | 12  | C2CD2     |
| chr1:26255170-26255865    | 91  | CEP85     |
| chr18:47112976-47136449   | 5   | HDHD2     |
| chr2:43912431-43918398    | 122 | LRPPRC    |
| chr17:1479430-1479705     | 9   | MYO1C     |
| chr2:240005209-240014860  | 63  | NDUFA10   |
| chr17:47590716-47601747   | 13  | NPEPPS    |
| chr8:58623219-58643073    | 16  | NSMAF     |
| chr3:138694785-138699095  | 30  | PIK3CB    |
| chr6:149533457-149535738  | 5   | PPIL4     |
| chr8:47877723-47886147    | 11  | PRKDC     |
| chr3:8898893-8902520      | 5   | RAD18     |
| chr3:50106766-50109688    | 45  | RBM5      |
| chr3:196885150-196903610  | 15  | SENP5     |
| chr16:88671276-88672122   | 1   | SNAI3-AS1 |
| chr7:17890362-17907340    | 38  | SNX13     |
| chr16:87981035-87984259   | 32  | BANP      |
| chr8:67118247-67137603    | 25  | CSPP1     |
| chr3:170171372-170178938  | 186 | PHC3      |
| chr5:40716396-40730343    | 2   | TTC33     |
| chr7:98312096-98317356    | 17  | BAIAP2L1  |
| chr5:146164309-146172774  | 18  | LARS      |
| chr2:189689526-189696369  | 12  | ANKAR     |
| chr4:40934455-40945073    | 39  | APBB2     |
| chr13:110687720-110705571 | 2   | CARS2     |
| chr8:117818434-117837201  | 42  | EXT1      |
| chr1:155312254-155312584  | 1   | FDPS      |
| chr5:177619077-177627614  | 38  | LOC202181 |

|                           |      |          |
|---------------------------|------|----------|
| chr2:171809605-171855949  | 4    | SLC25A12 |
| chr5:37177620-37181005    | 2    | C5orf42  |
| chr3:141903619-141907274  | 2    | ATP1B3   |
| chr22:45738730-45740538   | 3    | ATXN10   |
| chr20:32795408-32797299   | 19   | DNMT3B   |
| chr3:56669699-56673725    | 188  | FAM208A  |
| chr5:138555482-138555787  | 45   | nogene   |
| chr6:17669292-17675033    | 23   | NUP153   |
| chr2:135129994-135130721  | 20   | RAB3GAP1 |
| chr1:176116623-176163891  | 29   | RFWD2    |
| chrX:47243395-47245482    | 8    | USP11    |
| chr4:3316069-3318051      | 53   | RGS12    |
| chr20:13483226-13537049   | 12   | TASP1    |
| chr8:118580714-118585992  | 20   | SAMD12   |
| chr2:135090997-135093693  | 29   | RAB3GAP1 |
| chr22:45700281-45740538   | 476  | ATXN10   |
| chr21:29326058-29351813   | 3    | BACH1    |
| chr6:35619095-35672759    | 3    | FKBP5    |
| chr13:19751270-19759418   | 4    | PSPC1    |
| chr3:41931843-41938197    | 8    | ULK4     |
| chr2:190900563-190910321  | 52   | GLS      |
| chr5:149501014-149513209  | 24   | CSNK1A1  |
| chr14:64442053-64453861   | 20   | MTHFD1   |
| chr4:143543508-143543972  | 2002 | SMARCA5  |
| chr13:30227411-30284882   | 11   | KATNAL1  |
| chr3:144263866-144270349  | 2    | nogene   |
| chr6:167864550-167891029  | 48   | MLLT4    |
| chr2:111800796-111803839  | 21   | ANAPC1   |
| chr19:10772478-10786706   | 29   | DNM2     |
| chr7:148846469-148850525  | 28   | EZH2     |
| chr3:71493425-71501988    | 25   | FOXP1    |
| chr6:1675210-1675608      | 15   | nogene   |
| chr5:151946638-151947795  | 35   | nogene   |
| chr8:31142625-31150455    | 12   | WRN      |
| chr10:1010419-1012662     | 18   | GTPBP4   |
| chr2:3421880-3424663      | 43   | TRAPPC12 |
| chr4:128091000-128091512  | 31   | LARP1B   |
| chr20:58418210-58441083   | 11   | VAPB     |
| chr22:24113565-24134415   | 43   | CABIN1   |
| chr1:64666056-64675983    | 25   | CACHD1   |
| chr10:126970701-126987617 | 39   | DOCK1    |
| chr1:23053760-23057565    | 3    | KDM1A    |
| chr2:135129994-135135932  | 14   | RAB3GAP1 |

|                           |     |          |
|---------------------------|-----|----------|
| chr6:108854224-108876350  | 16  | ARMC2    |
| chr16:57164000-57172874   | 15  | FAM192A  |
| chr1:153761569-153765063  | 39  | INTS3    |
| chr1:150927703-150941428  | 14  | SETDB1   |
| chr18:662145-671451       | 24  | TYMS     |
| chr17:76738281-76754204   | 1   | MFSD11   |
| chr7:106092948-106099282  | 17  | SYPL1    |
| chrX:46853475-46854141    | 2   | RP2      |
| chr5:179765325-179769089  | 17  | MAML1    |
| chr16:74644361-74649202   | 2   | RFWD3    |
| chr12:123334052-123341088 | 7   | SBNO1    |
| chr19:40255157-40257054   | 18  | AKT2     |
| chr1:155721516-155726019  | 195 | DAP3     |
| chr21:32748498-32755353   | 33  | PAXBP1   |
| chr3:126629378-126647296  | 10  | TXNRD3   |
| chr1:16294782-16316568    | 7   | FBXO42   |
| chr16:4831978-4832912     | 6   | GLYR1    |
| chr6:30730021-30731100    | 16  | FLOT1    |
| chr16:81011929-81014391   | 2   | CENPN    |
| chr17:36986616-36990857   | 105 | AATF     |
| chr10:32543299-32584304   | 85  | CCDC7    |
| chr11:77624962-77629899   | 349 | CLNS1A   |
| chr2:15374607-15427794    | 19  | NBAS     |
| chr2:9568364-9568726      | 1   | nogene   |
| chr11:73716250-73720899   | 5   | RAB6A    |
| chr15:89594414-89595611   | 36  | TICRR    |
| chr8:63186146-63187745    | 55  | YTHDF3   |
| chr9:125484442-125506417  | 30  | MAPKAP1  |
| chr6:44250422-44251116    | 31  | nogene   |
| chr13:100268688-100273346 | 36  | PCCA     |
| chr6:110667433-110773937  | 3   | CDK19    |
| chr1:44241914-44248038    | 11  | ERI3-IT1 |
| chr16:89752137-89767237   | 3   | FANCA    |
| chr4:39300020-39303151    | 64  | RFC1     |
| chr7:67055834-67098718    | 33  | TYW1     |
| chr1:162597791-162601514  | 17  | UAP1     |
| chr3:33400188-33425741    | 55  | UBP1     |
| chr1:220182256-220182931  | 45  | RAB3GAP2 |
| chr5:138781922-138812302  | 16  | CTNNA1   |
| chr7:90352815-90355230    | 19  | GTPBP10  |
| chr20:44978442-44987296   | 52  | STK4     |
| chr7:92294888-92307656    | 124 | ANKIB1   |
| chr22:20554935-20566817   | 16  | MED15    |

|                          |     |            |
|--------------------------|-----|------------|
| chr3:47729024-47772936   | 187 | SMARCC1    |
| chr4:25314045-25315400   | 52  | ZCCHC4     |
| chr11:74963594-74969699  | 11  | SPCS2      |
| chr8:130358016-130362366 | 34  | ASAP1      |
| chr10:35483403-35553185  | 13  | CCNY       |
| chr10:43154896-43158931  | 6   | CSGALNACT2 |
| chr4:15630665-15644708   | 19  | FBXL5      |
| chr14:65455620-65478414  | 2   | FUT8       |
| chr2:172558707-172566933 | 34  | PDK1       |
| chr14:39095897-39096139  | 7   | SEC23A     |
| chr20:31544946-31561736  | 3   | HM13       |
| chr7:129379640-129389734 | 4   | AHCYL2     |
| chr20:32704022-32706760  | 6   | COMMD7     |
| chr9:20715321-20758191   | 40  | FOCAD      |
| chr10:68038092-68044563  | 13  | HERC4      |
| chr19:5039835-5041251    | 89  | KDM4B      |
| chr20:5952010-5955251    | 2   | MCM8       |
| chr6:42883450-42884750   | 45  | RPL7L1     |
| chr7:24623665-24663721   | 20  | MPP6       |
| chrX:57842245-57850693   | 10  | nogene     |
| chr1:168231513-168239160 | 25  | SFT2D2     |
| chr4:3186596-3199939     | 3   | HTT        |
| chr4:165218024-165238899 | 23  | KLHL2      |
| chr1:151658234-151693483 | 15  | SNX27      |
| chr3:133608534-133617326 | 3   | TOPBP1     |
| chr21:37108391-37123028  | 11  | TTC3       |
| chr2:200920221-200937966 | 16  | ORC2       |
| chr5:122799691-122808355 | 38  | SNX2       |
| chr2:74205704-74208721   | 16  | MTHFD2     |
| chr4:505717-508970       | 10  | PIGG       |
| chr6:154787860-154810208 | 15  | SCAF8      |
| chr3:12528887-12532773   | 3   | TSEN2      |
| chr9:88462495-88462749   | 3   | SPIN1      |
| chr12:32708152-32713371  | 16  | DNM1L      |
| chr18:79110354-79154555  | 12  | ATP9B      |
| chr2:53693883-53750941   | 20  | GPR75-ASB3 |
| chr4:13336892-13381594   | 5   | RAB28      |
| chr3:185590113-185600855 | 17  | SENP2      |
| chr14:99457555-99465813  | 33  | SETD3      |
| chr22:49804203-49824331  | 33  | BRD1       |
| chr12:82369386-82456820  | 37  | METTTL25   |
| chr1:171512031-171522259 | 9   | PRRC2C     |
| chr5:65451474-65471142   | 14  | ADAMTS6    |

|                           |     |          |
|---------------------------|-----|----------|
| chr11:120457720-120474635 | 16  | ARHGEF12 |
| chr7:34966893-34973605    | 32  | DPY19L1  |
| chr16:57172775-57173869   | 53  | FAM192A  |
| chr14:31113103-31119866   | 2   | HECTD1   |
| chr2:55661955-55673079    | 16  | PNPT1    |
| chr14:50640749-50649389   | 3   | SAV1     |
| chr19:19303347-19303847   | 18  | SUGP1    |
| chr5:65242103-65473952    | 16  | ADAMTS6  |
| chr7:73459535-73470483    | 28  | BAZ1B    |
| chr15:92924320-92929091   | 154 | CHD2     |
| chr5:134790469-134807941  | 14  | DDX46    |
| chr17:43498861-43500103   | 41  | DHX8     |
| chr15:76287845-76292700   | 102 | ETFA     |
| chr1:20765376-20779911    | 3   | HP1BP3   |
| chrX:115122526-115130199  | 50  | LRCH2    |
| chr10:101798841-101807901 | 4   | MGEA5    |
| chr7:66528672-66529097    | 30  | nogene   |
| chr3:170359698-170361429  | 28  | SKIL     |
| chr10:91849511-91851336   | 20  | TNKS2    |
| chr8:99156548-99275254    | 31  | VPS13B   |
| chr12:133191488-133192003 | 79  | ZNF268   |
| chr7:64543706-64544432    | 205 | ZNF680   |
| chr7:65757982-65760556    | 27  | CCT6P1   |
| chr3:126642031-126647296  | 75  | TXNRD3   |
| chr1:144955438-144960398  | 19  | SRGAP2B  |
| chr6:42573733-42573993    | 13  | UBR2     |
| chr5:21491320-21495182    | 160 | GUSBP1   |
| chr3:197149742-197161738  | 2   | DLG1     |
| chr16:66730111-66732505   | 36  | DYNC1LI2 |
| chr6:70486166-70502791    | 2   | FAM135A  |
| chr1:1815755-1825499      | 334 | GNB1     |
| chr13:23798723-23886506   | 171 | MIPEP    |
| chr5:88196375-88203075    | 2   | TMEM161B |
| chr2:61492034-61497007    | 49  | XPO1     |
| chr8:140800458-140803650  | 21  | PTK2     |
| chr18:12814202-12836891   | 84  | PTPN2    |
| chr4:53383772-53428183    | 48  | FIP1L1   |
| chr10:27935009-27936880   | 45  | ARMC4    |
| chr10:21612347-21617207   | 5   | MLLT10   |
| chr5:80678926-80744615    | 28  | MSH3     |
| chr14:34585421-34586036   | 2   | nogene   |
| chr12:8749861-8754093     | 16  | RIMKLB   |
| chr15:84538531-84546277   | 7   | UBE2Q2P1 |

|                           |     |           |
|---------------------------|-----|-----------|
| chr19:37089038-37091121   | 21  | ZNF420    |
| chr11:63658760-63659252   | 173 | ATL3      |
| chr10:110502720-110510596 | 16  | DUSP5     |
| chr8:140735250-140764290  | 8   | PTK2      |
| chr8:116655855-116726172  | 3   | EIF3H     |
| chr6:35587033-35642843    | 3   | FKBP5     |
| chr7:86925527-86947922    | 7   | KIAA1324L |
| chr6:169582835-169634525  | 1   | WDR27     |
| chr6:110887504-110888983  | 29  | AMD1      |
| chr1:84179176-84235364    | 16  | PRKACB    |
| chr15:41375711-41377304   | 61  | NUSAP1    |
| chr14:77557040-77576915   | 35  | SPTLC2    |
| chr3:184181695-184182868  | 13  | AP2M1     |
| chr5:135343259-135370142  | 23  | H2AFY     |
| chr1:45602254-45605016    | 12  | NASP      |
| chr1:8508626-8557523      | 43  | RERE      |
| chr1:32786361-32791254    | 2   | YARS      |
| chr5:43122038-43139309    | 105 | ZNF131    |
| chr1:243270104-243286397  | 26  | SDCCAG8   |
| chr9:100303631-100321771  | 11  | TEX10     |
| chr1:155358610-155359386  | 19  | nogene    |
| chr3:57841298-57864857    | 5   | SLMAP     |
| chr2:9523248-9536828      | 12  | ADAM17    |
| chr5:126603569-126604183  | 57  | PHAX      |
| chr6:124996574-125045444  | 2   | RNF217    |
| chr11:65504132-65504595   | 4   | nogene    |
| chr1:11947975-11950520    | 6   | PLOD1     |
| chr2:69806384-69808189    | 4   | ANXA4     |
| chr5:633768-644425        | 11  | CEP72     |
| chr14:37369516-37422949   | 28  | MIPOL1    |
| chr20:36911217-36912552   | 16  | SAMHD1    |
| chr10:27134038-27136385   | 18  | YME1L1    |
| chr7:148729961-148737743  | 20  | CUL1      |
| chr11:47625673-47634734   | 6   | MTCH2     |
| chr20:47309658-47310204   | 30  | ZMYND8    |
| chr12:22484696-22506819   | 40  | C2CD5     |
| chr5:157791702-157791995  | 5   | CLINT1    |
| chr10:68442916-68445083   | 14  | DNA2      |
| chr13:30240459-30283791   | 254 | KATNAL1   |
| chr4:55411613-55424643    | 3   | TMEM165   |
| chr9:125467971-125484583  | 7   | MAPKAP1   |
| chr11:34957383-34970286   | 6   | PDHX      |
| chr17:5338018-5350629     | 2   | RABEP1    |



|                           |     |          |
|---------------------------|-----|----------|
| chr19:37643264-37647899   | 4   | ZFP30    |
| chr2:215312497-215325329  | 1   | ATIC     |
| chr7:40045835-40088331    | 4   | CDK13    |
| chr20:9437001-9444243     | 3   | PLCB4    |
| chr16:72088986-72090786   | 234 | TXNL4B   |
| chr12:68715626-68725796   | 102 | NUP107   |
| chr1:225038693-225043983  | 45  | DNAH14   |
| chr3:196487398-196488683  | 51  | RNF168   |
| chr18:9577063-9595153     | 38  | PPP4R1   |
| chr20:45075017-45077961   | 4   | STK4     |
| chr10:3138363-3138903     | 13  | PITRM1   |
| chr4:183810105-183829990  | 2   | nogene   |
| chr3:150622384-150627914  | 13  | SELT     |
| chr4:145110967-145121391  | 36  | ABCE1    |
| chr3:53874210-53876080    | 63  | ACTR8    |
| chr14:32117139-32152528   | 55  | ARHGAP5  |
| chr8:61644599-61684188    | 67  | ASPH     |
| chr10:32471063-32481782   | 15  | CCDC7    |
| chr11:117335604-117344277 | 28  | CEP164   |
| chr11:70405264-70429199   | 14  | CTTN     |
| chr13:59833106-59839448   | 18  | DIAPH3   |
| chr8:28129501-28162078    | 6   | ELP3     |
| chr5:153994918-154034967  | 21  | FAM114A2 |
| chr2:222599927-222624479  | 24  | FARSB    |
| chr6:42822017-42830172    | 2   | GLTSCR1L |
| chr19:5016256-5033031     | 8   | KDM4B    |
| chr7:92213194-92226682    | 17  | KRIT1    |
| chr9:110941420-110973558  | 274 | LPAR1    |
| chr19:12230459-12234908   | 14  | nogene   |
| chr6:87621353-87636486    | 12  | ORC3     |
| chr5:50778068-50797233    | 24  | PARP8    |
| chr1:214369456-214372839  | 7   | PTPN14   |
| chr6:3283851-3298218      | 23  | SLC22A23 |
| chr2:213310058-213340270  | 56  | SPAG16   |
| chr3:30644746-30674246    | 3   | TGFBR2   |
| chr20:35044504-35057571   | 19  | TRPC4AP  |
| chr14:102193462-102209862 | 14  | WDR20    |
| chr4:55411613-55417985    | 156 | TMEM165  |
| chr22:28629551-28633974   | 83  | TTC28    |
| chr12:63597808-63663845   | 18  | DPY19L2  |
| chr20:34477771-34479789   | 36  | ITCH     |
| chr7:130173631-130181719  | 6   | TMEM209  |
| chr10:92934143-92940824   | 18  | EXOC6    |

|                           |     |          |
|---------------------------|-----|----------|
| chr5:62550366-62601848    | 17  | IPO11    |
| chr1:185300436-185305643  | 11  | IVNS1ABP |
| chr9:97139852-97146151    | 16  | nogene   |
| chrX:155415532-155419562  | 6   | nogene   |
| chr2:183128286-183133623  | 197 | NUP35    |
| chr8:100709132-100718280  | 27  | PABPC1   |
| chr7:1898199-2002121      | 7   | MAD1L1   |
| chrX:77633206-77636056    | 16  | ATRX     |
| chr4:2596083-2646832      | 8   | FAM193A  |
| chr17:47664158-47665158   | 7   | KPNB1    |
| chr17:75208526-75209985   | 7   | NUP85    |
| chr11:18514677-18519603   | 41  | TSG101   |
| chr1:233227225-233259344  | 12  | PCNXL2   |
| chr8:140830471-140879637  | 184 | PTK2     |
| chr10:99969114-99972134   | 75  | DNMBP    |
| chr16:11994028-11995160   | 11  | nogene   |
| chr1:23785674-23786423    | 25  | PITHD1   |
| chr16:70541668-70548442   | 28  | SF3B3    |
| chrX:131755597-131777744  | 77  | FIRRE    |
| chr17:82568053-82571870   | 6   | FOXK2    |
| chr22:40832568-40848369   | 48  | ST13     |
| chr3:119905754-119916174  | 15  | GSK3B    |
| chr12:48063709-48101516   | 28  | SENP1    |
| chr1:180397515-180495525  | 85  | ACBD6    |
| chr1:32036909-32038619    | 80  | KHDRBS1  |
| chr4:150735257-150817257  | 36  | LRBA     |
| chr2:197523623-197548415  | 12  | MOB4     |
| chr21:22032384-22043087   | 6   | nogene   |
| chr3:196361843-196403019  | 16  | UBXN7    |
| chr12:110292019-110296737 | 34  | ATP2A2   |
| chr12:50427761-50435624   | 41  | LARP4    |
| chr5:138191473-138192657  | 26  | CDC23    |
| chr10:7774830-7780307     | 7   | KIN      |
| chr6:100798712-100848707  | 27  | ASCC3    |
| chr17:82805874-82814934   | 48  | TBCD     |
| chr22:46390391-46391816   | 6   | CELSR1   |
| chr4:41142986-41145230    | 21  | APBB2    |
| chr21:25954589-25955755   | 76  | APP      |
| chr8:130159863-130188183  | 6   | ASAP1    |
| chr12:53669147-53669948   | 23  | ATP5G2   |
| chr16:75293909-75305182   | 19  | CFDP1    |
| chr7:6421726-6436533      | 34  | DAGLB    |
| chr7:6028614-6029032      | 32  | EIF2AK1  |

|                           |     |              |
|---------------------------|-----|--------------|
| chr1:42265114-42278784    | 107 | FOXJ3        |
| chr9:128533512-128533951  | 12  | GLE1         |
| chr5:62449926-62451933    | 23  | IPO11        |
| chr5:176347577-176350737  | 3   | KIAA1191     |
| chr1:28890322-28891801    | 8   | nogene       |
| chr4:67798638-67802419    | 6   | nogene       |
| chr11:74850929-74874895   | 7   | nogene       |
| chr10:124942456-124962408 | 94  | nogene       |
| chr1:15792836-15796943    | 21  | nogene       |
| chr18:24332941-24341658   | 6   | OSBPL1A      |
| chr13:24441845-24443730   | 34  | PARP4        |
| chr3:196247366-196248323  | 63  | PCYT1A       |
| chr9:125158240-125160906  | 2   | PPP6C        |
| chr2:203489583-203495353  | 64  | RAPH1        |
| chr9:112078537-112098662  | 12  | SUSD1        |
| chrX:71368053-71375286    | 21  | TAF1         |
| chr2:61278164-61281242    | 98  | USP34        |
| chr2:63981645-63984019    | 29  | VPS54        |
| chr2:71348752-71350271    | 35  | ZNF638       |
| chr5:118928536-118944649  | 152 | DTWD2        |
| chr12:110025741-110030758 | 23  | ANKRD13A     |
| chr4:40890363-40945073    | 8   | APBB2        |
| chr17:67945408-67975958   | 87  | BPTF         |
| chr1:85350414-85351579    | 8   | DDAH1        |
| chr22:38537591-38538612   | 6   | DMC1         |
| chr2:85368685-85371209    | 74  | ELMOD3       |
| chr7:139596716-139620563  | 10  | HIPK2        |
| chr4:129724509-129727033  | 2   | LOC101927282 |
| chr5:10415487-10417404    | 394 | 6-Mar        |
| chr10:94520458-94520754   | 17  | nogene       |
| chr19:43872628-43884051   | 15  | nogene       |
| chr10:99907300-99907490   | 15  | nogene       |
| chr10:34377966-34384254   | 11  | PARD3        |
| chr6:3737078-3742297      | 21  | PXDC1        |
| chr17:64551583-64562966   | 24  | SMURF2       |
| chr9:37126311-37305714    | 61  | ZCCHC7       |
| chr13:77251150-77288376   | 3   | MYCBP2       |
| chr1:179986168-179992221  | 21  | CEP350       |
| chr22:31758545-31778168   | 10  | DEPDC5       |
| chr17:8204849-8207840     | 18  | AURKB        |
| chr10:68963290-68967203   | 142 | DDX21        |
| chr12:124952397-124954211 | 113 | DHX37        |
| chr8:77002693-77007102    | 5   | nogene       |

|                           |     |           |
|---------------------------|-----|-----------|
| chr15:55327530-55341802   | 2   | PIGB      |
| chr12:113320330-113321348 | 35  | SLC8B1    |
| chr8:102261914-102264558  | 35  | UBR5      |
| chr6:57379900-57606457    | 1   | PRIM2     |
| chr2:39272282-39280356    | 2   | MAP4K3    |
| chr5:108867766-108898132  | 5   | FER       |
| chr14:31162592-31169468   | 3   | HECTD1    |
| chr15:68145815-68153695   | 15  | PIAS1     |
| chr3:61748877-62003497    | 13  | PTPRG     |
| chr3:184936245-184966713  | 18  | VPS8      |
| chr2:63433744-63439871    | 188 | WDPCP     |
| chr9:37302187-37305714    | 33  | ZCCHC7    |
| chr7:99385701-99394119    | 2   | ARPC1B    |
| chr15:74926765-74929232   | 132 | COX5A     |
| chr17:8444259-8460160     | 33  | NDEL1     |
| chr3:61989624-62015932    | 2   | PTPRG     |
| chr18:756556-756835       | 218 | YES1      |
| chr15:64180347-64216713   | 15  | CSNK1G1   |
| chr17:28921687-28927063   | 189 | PHF12     |
| chr6:138785226-138788439  | 3   | CCDC28A   |
| chr19:44076321-44085803   | 21  | ZNF284    |
| chr3:198072755-198077288  | 8   | ANKRD18DP |
| chr2:101257790-101265047  | 68  | CNOT11    |
| chr19:12679456-12680325   | 51  | DHPS      |
| chr6:629834-689212        | 2   | EXOC2     |
| chr3:183017265-183022554  | 7   | MCCC1     |
| chr7:24620051-24650712    | 166 | MPP6      |
| chr3:179690240-179707076  | 20  | USP13     |
| chr10:103091563-103095980 | 15  | NT5C2     |
| chr2:69329296-69329798    | 3   | GFPT1     |
| chr11:118583178-118584644 | 18  | ARCN1     |
| chr1:20892618-20904971    | 23  | EIF4G3    |
| chr17:7936817-7937127     | 15  | CNTROB    |
| chr4:107682014-107694006  | 51  | PAPSS1    |
| chr5:133959493-133960020  | 30  | C5orf15   |
| chr1:212329134-212349242  | 13  | PPP2R5A   |
| chr1:40406735-40409835    | 32  | SMAP2     |
| chr9:112262434-112276013  | 30  | PTBP3     |
| chr6:57926425-57930291    | 14  | GUSBP4    |
| chrX:70290437-70290805    | 26  | KIF4A     |
| chr6:49431728-49443881    | 4   | nogene    |
| chr10:94474667-94511654   | 20  | TBC1D12   |
| chr10:94497054-94511654   | 5   | TBC1D12   |

|                           |     |          |
|---------------------------|-----|----------|
| chr10:12081471-12117755   | 2   | DHTKD1   |
| chr15:89307475-89314707   | 30  | FANCI    |
| chr5:108832769-108835807  | 2   | FER      |
| chr15:60455002-60468322   | 2   | ICE2     |
| chr11:108185231-108190500 | 45  | NPAT     |
| chr1:51823663-51827869    | 11  | NRD1     |
| chr11:117239111-117239800 | 75  | RNF214   |
| chr14:54984722-55000992   | 40  | WDHD1    |
| chr3:183747671-183762279  | 7   | YEATS2   |
| chr1:155675009-155679512  | 413 | YY1AP1   |
| chr19:21033455-21034184   | 135 | ZNF430   |
| chr5:60918264-60928959    | 11  | ERCC8    |
| chr10:45888164-45939447   | 16  | PARGP1   |
| chr7:158741522-158743678  | 2   | ESYT2    |
| chr19:42335034-42335385   | 47  | MEGF8    |
| chr5:80767932-80778836    | 6   | MSH3     |
| chr2:61490641-61498913    | 4   | XPO1     |
| chr9:17309057-17342444    | 9   | CNTLN    |
| chr17:82178473-82179189   | 3   | CCDC57   |
| chr3:53304176-53319473    | 8   | DCP1A    |
| chr1:182842544-182843434  | 26  | DHX9     |
| chr3:136945582-136946295  | 24  | NCK1     |
| chr12:100282942-100291660 | 31  | SCYL2    |
| chr1:109573736-109574037  | 19  | GNAI3    |
| chr10:27169943-27171083   | 54  | MASTL    |
| chr2:213310058-213364145  | 96  | SPAG16   |
| chr4:130787-131505        | 36  | ZNF718   |
| chr18:26170674-26171200   | 4   | nogene   |
| chr11:108186481-108190500 | 68  | NPAT     |
| chr17:75242335-75243570   | 136 | GGA3     |
| chr2:39286851-39288280    | 27  | MAP4K3   |
| chr21:37087246-37088886   | 33  | TTC3     |
| chrX:129919174-129921587  | 14  | UTP14A   |
| chr9:91883257-91887113    | 39  | nogene   |
| chr1:225097117-225123614  | 4   | DNAH14   |
| chr12:110387738-110396452 | 13  | ANAPC7   |
| chr14:93293857-93294937   | 60  | BTBD7    |
| chr10:102029637-102033339 | 2   | C10orf76 |
| chr12:50671185-50680763   | 5   | DIP2B    |
| chr15:77365162-77388802   | 17  | nogene   |
| chr20:1452492-1458274     | 28  | NSFL1C   |
| chr3:73047185-73061060    | 1   | PPP4R2   |
| chr2:226864603-226867688  | 36  | RHBDD1   |

|                           |     |            |
|---------------------------|-----|------------|
| chr14:52757318-52759754   | 18  | STYX       |
| chr17:18290556-18292852   | 3   | TOP3A      |
| chr6:99488199-99510230    | 13  | USP45      |
| chr20:25639728-25645648   | 48  | ZNF337-AS1 |
| chr10:86838864-86900126   | 12  | BMPR1A     |
| chr18:76868684-76881512   | 28  | ZNF236     |
| chr19:45613540-45614700   | 43  | EML2       |
| chr10:5903019-5909294     | 6   | FBXO18     |
| chr22:21669912-21675115   | 12  | PPIL2      |
| chr1:77858937-77866391    | 122 | FAM73A     |
| chr2:108752997-108753563  | 31  | RANBP2     |
| chr17:35833906-35838553   | 3   | TAF15      |
| chr17:41981854-41982401   | 4   | DNAJC7     |
| chr21:45184922-45204736   | 14  | ADARB1     |
| chr1:243693666-243843282  | 43  | AKT3       |
| chr3:138221925-138223733  | 9   | ARMC8      |
| chr10:32451591-32463049   | 7   | CCDC7      |
| chr6:83909008-83924592    | 45  | CYB5R4     |
| chr1:77803269-77813867    | 16  | FAM73A     |
| chr15:69421646-69423329   | 34  | KIF23      |
| chr19:55674122-55674621   | 12  | nogene     |
| chr3:56570090-56570499    | 12  | nogene     |
| chr3:8840195-8841539      | 3   | nogene     |
| chr8:47933019-47935058    | 58  | PRKDC      |
| chr17:76287191-76290077   | 23  | QRICH2     |
| chr3:49962575-49975392    | 25  | RBM6       |
| chr2:40428472-40430301    | 205 | SLC8A1     |
| chr20:31757406-31771682   | 12  | TPX2       |
| chr5:172234121-172234358  | 38  | UBTD2      |
| chr11:9494645-9516362     | 2   | ZNF143     |
| chr22:41125863-41140257   | 70  | EP300      |
| chr2:108839184-108856970  | 83  | CCDC138    |
| chr2:241403827-241413421  | 84  | FARP2      |
| chr6:15246380-15410365    | 11  | JARID2     |
| chr7:4989062-4996798      | 60  | RNF216P1   |
| chr5:134697125-134698057  | 58  | SEC24A     |
| chr9:134139819-134148343  | 26  | WDR5       |
| chr17:1079329-1100735     | 28  | ABR        |
| chr12:122932191-122935431 | 9   | ABCB9      |
| chr6:30627459-30643011    | 3   | ATAT1      |
| chr3:191380158-191391897  | 2   | CCDC50     |
| chr12:70294070-70311017   | 20  | CNOT2      |
| chr4:151415723-151482648  | 13  | FAM160A1   |

|                           |     |           |
|---------------------------|-----|-----------|
| chr10:130145210-130166980 | 30  | GLRX3     |
| chr1:1793244-1817875      | 27  | GNB1      |
| chr16:11891061-11898035   | 10  | GSPT1     |
| chr10:68025545-68038169   | 33  | HERC4     |
| chr12:109451590-109460805 | 14  | KCTD10    |
| chrX:101163970-101164368  | 2   | nogene    |
| chrX:107150855-107153503  | 14  | NUP62CL   |
| chr1:7977651-7985135      | 3   | PARK7     |
| chr20:38488402-38499633   | 3   | RALGAPB   |
| chr15:90959899-90961774   | 37  | RCCD1     |
| chr20:19956614-19960811   | 21  | RIN2      |
| chr8:213120-213710        | 31  | RPL23AP53 |
| chr3:52926030-52928341    | 113 | SFMBT1    |
| chr1:24662659-24670315    | 19  | SRRM1     |
| chr3:197763465-197768587  | 27  | FYTTD1    |
| chr2:177434326-177445626  | 6   | AGPS      |
| chr6:104811310-104843298  | 5   | HACE1     |
| chrX:150727214-150732730  | 25  | MTMR1     |
| chr5:177950308-177957662  | 5   | nogene    |
| chr4:112808902-112818264  | 83  | ANK2      |
| chr12:22506710-22544179   | 12  | C2CD5     |
| chr17:17254858-17264981   | 11  | COPS3     |
| chr13:30274693-30283791   | 25  | KATNAL1   |
| chr14:70748828-70750081   | 92  | MAP3K9    |
| chrX:27301038-27336493    | 3   | nogene    |
| chr17:5462232-5462826     | 13  | nogene    |
| chr2:45476992-45562756    | 43  | SRBD1     |
| chr22:28617897-28629830   | 2   | TTC28     |
| chr19:52001812-52002281   | 18  | ZNF615    |
| chr14:59456437-59479351   | 4   | L3HYPDH   |
| chr7:18585280-18594029    | 67  | HDAC9     |
| chrX:106985095-106986200  | 18  | MORC4     |
| chr9:128464436-128465460  | 13  | nogene    |
| chr10:45939360-45962994   | 321 | PARGP1    |
| chr3:11331339-11380052    | 7   | ATG7      |
| chr1:59321535-59340069    | 17  | FGGY      |
| chr14:39055142-39076093   | 4   | SEC23A    |
| chr19:47209158-47210724   | 26  | SAE1      |
| chr3:126050942-126068246  | 4   | SLC41A3   |
| chr10:86875866-86900126   | 68  | BMPR1A    |
| chr17:28122602-28172618   | 92  | NLK       |
| chr16:29969479-29969965   | 4   | nogene    |
| chr18:6263946-6312056     | 166 | L3MBTL4   |

|                           |     |           |
|---------------------------|-----|-----------|
| chr17:47326225-47345098   | 35  | EFCAB13   |
| chr1:231364326-231367636  | 15  | EGLN1     |
| chr11:72867864-72902638   | 18  | FCHSD2    |
| chr15:83151214-83158041   | 6   | HDGFRP3   |
| chr19:38845616-38846090   | 3   | HNRNPL    |
| chr2:87052813-87055800    | 16  | LOC285074 |
| chr9:36369718-36376127    | 6   | RNF38     |
| chr10:132244878-132245955 | 56  | STK32C    |
| chr7:130022318-130023723  | 3   | ZC3HC1    |
| chr12:121494578-121549638 | 2   | KDM2B     |
| chr2:128186682-128187614  | 5   | UGGT1     |
| chr15:78544189-78545764   | 13  | PSMA4     |
| chr7:152309965-152358675  | 19  | KMT2C     |
| chr11:94795010-94831541   | 5   | AMOTL1    |
| chr12:32710928-32718763   | 16  | DNM1L     |
| chr3:56668396-56673725    | 32  | FAM208A   |
| chr1:109573736-109579361  | 15  | GNAI3     |
| chr4:168894578-168898714  | 13  | PALLD     |
| chr16:72617182-72617553   | 26  | nogene    |
| chr11:113840597-113854335 | 54  | USP28     |
| chr3:43565652-43577261    | 13  | ANO10     |
| chr21:33579349-33586181   | 2   | DONSON    |
| chr20:37201551-37210165   | 3   | RPN2      |
| chr2:9428764-9433960      | 70  | CPSF3     |
| chr5:40746797-40771863    | 4   | TTC33     |
| chr1:18942362-18943433    | 12  | nogene    |
| chr5:94868332-94924021    | 10  | MCTP1     |
| chr7:33351218-33367862    | 12  | BBS9      |
| chr12:124426621-124437996 | 17  | NCOR2     |
| chr8:47279861-47330895    | 5   | SPIDR     |
| chr6:10961304-10963843    | 14  | SYCP2L    |
| chr9:111914604-111931357  | 24  | UGCG      |
| chr1:44002312-44002985    | 2   | SLC6A9    |
| chr10:27114520-27121448   | 28  | YME1L1    |
| chr3:101417592-101459052  | 27  | SENP7     |
| chr5:179580946-179593645  | 83  | RUFY1     |
| chr2:177482058-177513908  | 14  | AGPS      |
| chr7:92350949-92362273    | 11  | ANKIB1    |
| chr3:107710451-107728960  | 15  | BBX       |
| chr18:23506969-23509279   | 4   | C18orf8   |
| chr19:3623687-3624162     | 468 | CACTIN    |
| chr2:134946100-134947899  | 2   | CCNT2     |
| chr2:207726841-207740706  | 1   | CCNYL1    |



|                           |     |           |
|---------------------------|-----|-----------|
| chr9:120437294-120448126  | 19  | CDK5RAP2  |
| chr1:239826349-239827378  | 6   | CHRM3     |
| chr5:119110150-119121139  | 2   | DMXL1     |
| chr8:94726330-94739790    | 17  | DPY19L4   |
| chr22:31462931-31463133   | 34  | EIF4ENIF1 |
| chr7:55978125-55984878    | 19  | GBAS      |
| chr3:158646164-158653467  | 14  | GFM1      |
| chr1:21847353-21849031    | 16  | HSPG2     |
| chr16:19732828-19733827   | 23  | IQCK      |
| chr8:144168294-144200541  | 9   | MROH1     |
| chr5:141410978-141411458  | 14  | nogene    |
| chr17:29280088-29281063   | 19  | nogene    |
| chr22:47860464-47862122   | 54  | nogene    |
| chr7:128577952-128580094  | 3   | nogene    |
| chr17:80266712-80266985   | 2   | nogene    |
| chr1:5922059-5933329      | 11  | NPHP4     |
| chr3:16294855-16303592    | 19  | OXNAD1    |
| chr1:148961836-148962640  | 16  | PDE4DIP   |
| chr1:28490950-28493091    | 35  | PHACTR4   |
| chr17:18865468-18889877   | 46  | PRPSAP2   |
| chr17:1875660-1883944     | 9   | RPA1      |
| chr16:89510489-89513037   | 26  | SPG7      |
| chr17:35834565-35838553   | 28  | TAF15     |
| chr1:230945388-230961303  | 60  | TTC13     |
| chr1:10149183-10161286    | 2   | UBE4B     |
| chr6:41856625-41891875    | 13  | USP49     |
| chr18:56758864-56781656   | 116 | WDR7      |
| chr7:99388038-99388261    | 19  | ARPC1B    |
| chr17:47402131-47409691   | 20  | EFCAB13   |
| chr8:55792697-55796152    | 2   | TGS1      |
| chr3:195342470-195392147  | 8   | ACAP2     |
| chr5:78156257-78165672    | 34  | AP3B1     |
| chr22:45700281-45702847   | 25  | ATXN10    |
| chr1:227139575-227317246  | 3   | CDC42BPA  |
| chr6:20781144-20846178    | 12  | CDKAL1    |
| chr11:68759568-68761687   | 54  | CPT1A     |
| chr4:182891402-182915575  | 427 | DCTD      |
| chr13:113474123-113484056 | 41  | DCUN1D2   |
| chr6:109765012-109777060  | 13  | FIG4      |
| chr5:131698916-131719417  | 8   | FNIP1     |
| chr12:112216291-112217195 | 20  | HECTD4    |
| chr11:119123567-119127125 | 27  | HINFP     |
| chr17:61954935-61956481   | 11  | MED13     |

|                           |     |         |
|---------------------------|-----|---------|
| chr10:68121437-68122340   | 47  | MYPN    |
| chr12:6521797-6523346     | 45  | NCAPD2  |
| chr5:36982164-36986301    | 18  | NIPBL   |
| chr2:55598415-55604076    | 24  | PPP4R3B |
| chr20:38057531-38066256   | 402 | RPRD1B  |
| chr12:123309309-123309856 | 13  | SBNO1   |
| chr11:85974707-85981228   | 16  | PICALM  |
| chr15:40698756-40709116   | 8   | RAD51   |
| chr7:18722951-18835997    | 6   | HDAC9   |
| chr11:122776218-122777210 | 164 | UBASH3B |
| chr5:108348398-108378726  | 2   | FBXL17  |
| chr3:48772954-48794049    | 30  | PRKAR2A |
| chr13:26665027-26671989   | 2   | WASF3   |
| chr2:197007805-197009031  | 18  | ANKRD44 |
| chr1:93212100-93217869    | 15  | CCDC18  |
| chr1:151236557-151236763  | 13  | PIP5K1A |
| chr9:136391941-136392777  | 12  | SNAPC4  |
| chrX:150793690-150816078  | 99  | CD99L2  |
| chr5:10386993-10391731    | 12  | 6-Mar   |
| chr15:44410792-44411135   | 26  | nogene  |
| chr6:17637152-17640064    | 12  | NUP153  |
| chr13:24249476-24253220   | 12  | SPATA13 |
| chr17:82870223-82911789   | 21  | TBCD    |
| chr3:32138586-32140366    | 6   | GPD1L   |
| chr8:140605531-140605914  | 12  | nogene  |
| chr17:1534098-1558559     | 76  | PITPNA  |
| chr7:6002452-6002636      | 16  | PMS2    |
| chr6:138943512-138944622  | 277 | REPS1   |
| chr5:677749-679441        | 14  | TPPP    |
| chr5:69355648-69366595    | 55  | AK6     |
| chr7:35879822-35885879    | 32  | 7-Sep   |
| chr1:42227882-42278672    | 17  | FOXJ3   |
| chr4:17623600-17625845    | 6   | MED28   |
| chr10:104008176-104018908 | 79  | SLK     |
| chr1:179118586-179131481  | 1   | ABL2    |
| chr5:179152141-179158879  | 12  | ADAMTS2 |
| chr3:122759223-122768882  | 12  | HSPBAP1 |
| chr16:11983565-12027444   | 3   | SNX29   |
| chr2:169878524-169906164  | 1   | UBR3    |
| chr12:1027747-1290012     | 21  | ERC1    |
| chr11:3768580-3768744     | 35  | NUP98   |
| chr2:48498492-48514967    | 5   | PPP1R21 |
| chr14:90019315-90033214   | 12  | TDP1    |

|                           |     |              |
|---------------------------|-----|--------------|
| chr5:65170616-65215487    | 57  | ADAMTS6      |
| chr2:32377587-32401623    | 24  | BIRC6        |
| chr18:13099475-13103588   | 11  | CEP192       |
| chr2:62135830-62141360    | 3   | COMMD1       |
| chr7:158735502-158748280  | 3   | ESYT2        |
| chr17:82720271-82720841   | 7   | FN3KRP       |
| chr13:23874845-23881787   | 16  | MIPEP        |
| chr18:54273925-54287411   | 2   | POLI         |
| chr3:121449314-121468431  | 23  | POLQ         |
| chr6:88844356-88853764    | 170 | RNGTT        |
| chr16:70213660-70222480   | 46  | SMG1P7       |
| chr4:7006631-7010781      | 3   | TBC1D14      |
| chr16:24750725-24777358   | 24  | TNRC6A       |
| chr12:132932712-132948270 | 4   | ZNF605       |
| chr7:149549192-149558839  | 6   | ZNF767P      |
| chr4:145885677-145892415  | 12  | ZNF827       |
| chr15:72217408-72219110   | 18  | PKM          |
| chr7:66797373-66827578    | 14  | RABGEF1      |
| chr18:8076454-8114827     | 83  | PTPRM        |
| chr13:21400372-21425678   | 50  | ZDHHC20      |
| chr7:23140768-23152209    | 11  | KLHL7        |
| chr5:171183166-171205612  | 41  | RANBP17      |
| chr16:8905186-8917156     | 13  | USP7         |
| chr20:21340720-21346550   | 137 | XRN2         |
| chr11:46508190-46512813   | 41  | AMBRA1       |
| chr3:11306942-11315493    | 6   | ATG7         |
| chr3:33626987-33663515    | 17  | CLASP2       |
| chr7:80188950-80212869    | 18  | GNAI1        |
| chr4:129724509-129749720  | 10  | LOC101927282 |
| chr12:78006418-78007445   | 4   | NAV3         |
| chr9:128803249-128804119  | 35  | TBC1D13      |
| chr21:31245487-31252189   | 6   | TIAM1        |
| chr7:130181622-130192823  | 35  | TMEM209      |
| chr17:623532-627316       | 21  | VPS53        |
| chr19:58285716-58295581   | 18  | ZNF8         |
| chr3:155910691-155925366  | 41  | GMPS         |
| chrX:150814861-150831293  | 3   | CD99L2       |
| chr15:50643339-50663046   | 75  | TRPM7        |
| chr17:59737452-59808876   | 21  | VMP1         |
| chr1:230663140-230671640  | 115 | COG2         |
| chr7:32675931-32679130    | 23  | DPY19L1P1    |
| chr20:46393092-46394532   | 6   | ELMO2        |
| chr22:41129889-41131633   | 16  | EP300        |

|                           |     |              |
|---------------------------|-----|--------------|
| chr15:77252366-77365225   | 25  | PEAK1        |
| chr13:23353784-23358481   | 12  | SACS         |
| chr18:2795948-2796521     | 12  | SMCHD1       |
| chr1:179302676-179323495  | 41  | SOAT1        |
| chr1:206392723-206421274  | 19  | SRGAP2       |
| chr8:123231299-123231757  | 95  | ZHX1-C8orf76 |
| chr10:110228188-110280085 | 12  | MXI1         |
| chr16:68121986-68174514   | 4   | NFATC3       |
| chr5:131548046-131562047  | 12  | RAPGEF6      |
| chr7:5739275-5741644      | 46  | RNF216       |
| chr1:40406735-40417096    | 7   | SMAP2        |
| chr12:31447537-31460381   | 9   | DENND5B      |
| chr12:110013124-110029635 | 13  | ANKRD13A     |
| chr16:71769622-71774592   | 13  | AP1G1        |
| chr7:107583881-107613432  | 1   | BCAP29       |
| chr1:227193785-227199652  | 37  | CDC42BPA     |
| chr13:60008543-60016145   | 26  | DIAPH3       |
| chr22:38562286-38568289   | 48  | DMC1         |
| chr1:42227882-42323827    | 64  | FOXJ3        |
| chr12:109988962-109991760 | 3   | GIT2         |
| chr7:50669721-50705323    | 26  | GRB10        |
| chr10:89758705-89762835   | 1   | KIF20B       |
| chr2:241089187-241094432  | 14  | MTERF4       |
| chr14:55060436-55060888   | 16  | nogene       |
| chr3:194604286-194611020  | 24  | TMEM44       |
| chr13:46020448-46045513   | 19  | ZC3H13       |
| chr3:195365481-195412916  | 14  | nogene       |
| chr2:189785345-189818180  | 4   | PMS1         |
| chr8:56963962-56980197    | 26  | IMPAD1       |
| chr15:41055246-41058781   | 15  | INO80        |
| chr5:168488601-168492847  | 92  | RARS         |
| chr3:197830769-197839397  | 157 | LRCH3        |
| chr7:1957628-2014642      | 6   | MAD1L1       |
| chr1:155395458-155459898  | 86  | ASH1L        |
| chr10:87756788-87776427   | 12  | ATAD1        |
| chr10:126970701-127061776 | 16  | DOCK1        |
| chr17:60479147-60500487   | 9   | APPBP2       |
| chr5:75379336-75403058    | 2   | COL4A3BP     |
| chr3:121460049-121468431  | 17  | POLQ         |
| chr5:151117126-151119390  | 2   | ANXA6        |
| chr10:24666984-24670397   | 3   | ARHGAP21     |
| chr10:84425730-84477664   | 21  | CCSER2       |
| chr1:225185290-225206179  | 12  | DNAH14       |

|                           |     |          |
|---------------------------|-----|----------|
| chr17:6589778-6600458     | 32  | KIAA0753 |
| chr4:128162193-128179512  | 13  | LARP1B   |
| chr20:35696376-35698590   | 2   | NFS1     |
| chr16:30069847-30070211   | 1   | nogene   |
| chr12:106363869-106369683 | 29  | POLR3B   |
| chr1:178776681-178811404  | 3   | RALGPS2  |
| chr2:3545700-3556904      | 19  | RNASEH1  |
| chr13:60444682-60494575   | 2   | TDRD3    |
| chr12:56433380-56434231   | 17  | TIMELESS |
| chr6:42659655-42666245    | 17  | UBR2     |
| chr22:40881769-40882177   | 76  | XPNPEP3  |
| chr22:29748417-29754863   | 1   | ZMAT5    |
| chr9:96827079-96852005    | 11  | ZNF782   |
| chr10:28535561-28583505   | 17  | WAC      |
| chr18:79193182-79214038   | 17  | ATP9B    |
| chr2:171435082-171453213  | 3   | DCAF17   |
| chr3:197104902-197149796  | 23  | DLG1     |
| chr10:92510049-92537550   | 3   | IDE      |
| chr17:61982197-61985090   | 4   | MED13    |
| chr10:73051052-73053590   | 11  | P4HA1    |
| chr5:102895850-102901413  | 2   | PAM      |
| chr15:34252169-34255392   | 1   | SLC12A6  |
| chr10:100923974-100926019 | 139 | SLF2     |
| chr2:43485233-43527988    | 63  | THADA    |
| chr1:243572925-243843282  | 18  | AKT3     |
| chrX:77557450-77558846    | 43  | ATRX     |
| chr15:90441505-90443478   | 150 | IQGAP1   |
| chr16:70532478-70544533   | 99  | SF3B3    |
| chr17:62552301-62553755   | 60  | TLK2     |
| chr9:19276157-19305527    | 5   | DENND4C  |
| chr22:29121356-29125416   | 58  | KREMEN1  |
| chr5:150541569-150549787  | 33  | NDST1    |
| chr18:56624287-56626457   | 8   | TXNL1    |
| chr7:156992943-156994181  | 23  | nogene   |
| chr3:196814450-196820567  | 37  | PAK2     |
| chr7:65754526-65756574    | 9   | CCT6P1   |
| chr7:139631164-139631725  | 2   | HIPK2    |
| chr13:32658238-32659280   | 2   | PDS5B    |
| chr12:6678126-6688226     | 4   | ZNF384   |
| chr5:157518822-157520031  | 87  | ADAM19   |
| chr12:54241743-54257692   | 5   | CBX5     |
| chr1:114736757-114749904  | 1   | CSDE1    |
| chr2:38837830-38847073    | 2   | DHX57    |

|                           |      |           |
|---------------------------|------|-----------|
| chr12:122216487-122224748 | 2    | DIABLO    |
| chr12:32713208-32722633   | 54   | DNM1L     |
| chr11:103280347-103323990 | 30   | DYNC2H1   |
| chr3:186787126-186787584  | 110  | EIF4A2    |
| chr1:44308309-44339322    | 204  | ERI3      |
| chr5:137985256-138021197  | 25   | FAM13B    |
| chr15:50300788-50301368   | 50   | GABPB1    |
| chr4:150467672-150491035  | 61   | LRBA      |
| chr17:45513184-45515525   | 13   | LRRC37A4P |
| chr2:206841106-206881891  | 11   | nogene    |
| chr13:44949721-44959574   | 14   | NUFIP1    |
| chr5:168566012-168568998  | 25   | PANK3     |
| chr3:123089167-123116298  | 1    | PDIA5     |
| chr9:127166068-127168772  | 1    | RALGPS1   |
| chr5:170878096-170924550  | 43   | RANBP17   |
| chr7:151470570-151491014  | 308  | RHEB      |
| chr16:57204503-57217035   | 29   | RSPRY1    |
| chr4:122979231-123028395  | 2    | SPATA5    |
| chr7:38789800-38821265    | 8    | VPS41     |
| chr8:86374029-86381629    | 42   | WWP1      |
| chr18:12698978-12701113   | 16   | CEP76     |
| chr17:12081355-12113360   | 123  | MAP2K4    |
| chr3:61621969-61623555    | 33   | nogene    |
| chr2:203193794-203197391  | 58   | NBEAL1    |
| chr22:38498084-38501280   | 69   | DDX17     |
| chr8:140879470-140890769  | 1106 | PTK2      |
| chr7:2149151-2219456      | 23   | MAD1L1    |
| chr6:44138479-44141098    | 3    | TMEM63B   |
| chr16:11698124-11721670   | 3    | TXNDC11   |
| chr3:122442037-122454001  | 30   | KPNA1     |
| chr8:125359174-125359428  | 28   | nogene    |
| chr16:88608933-88611536   | 20   | ZC3H18    |
| chr10:49832802-49843632   | 43   | PARG      |
| chr10:12249580-12250469   | 60   | CDC123    |
| chr1:246186742-246186942  | 345  | nogene    |
| chr17:60294682-60345608   | 17   | USP32     |
| chr7:130039463-130041473  | 48   | ZC3HC1    |
| chr4:176711498-176729746  | 94   | VEGFC     |
| chr1:228291897-228304566  | 7    | OBSCN     |
| chr2:74377431-74378245    | 15   | DCTN1     |
| chrX:97072940-97114965    | 13   | DIAPH2    |
| chr3:180968050-180970358  | 40   | FXR1      |
| chr11:9414254-9420698     | 5    | IPO7      |

|                          |      |          |
|--------------------------|------|----------|
| chr7:74096621-74097189   | 1    | LIMK1    |
| chr16:69653235-69655799  | 19   | NFAT5    |
| chr2:215325240-215338907 | 27   | ATIC     |
| chr2:43794456-43810524   | 11   | DYNC2LI1 |
| chr17:47664158-47674782  | 61   | KPNB1    |
| chr18:36198689-36205276  | 13   | MOCOS    |
| chr8:120453846-120456670 | 1    | MTBP     |
| chr9:35780266-35786775   | 11   | nogene   |
| chr19:52923368-52923675  | 11   | nogene   |
| chr8:47840015-47854214   | 33   | PRKDC    |
| chr6:88801563-88853764   | 65   | RNGTT    |
| chr21:36053582-36058924  | 11   | SETD4    |
| chr4:151147921-151149561 | 40   | SH3D19   |
| chr7:129205609-129208851 | 11   | SMO      |
| chr9:6420911-6460791     | 30   | UHRF2    |
| chr13:27075190-27090158  | 24   | USP12    |
| chr16:47311239-47375940  | 19   | ITFG1    |
| chr6:31648676-31651776   | 4    | BAG6     |
| chr18:8624937-8638416    | 34   | RAB12    |
| chr5:73773854-73780745   | 35   | ARHGEF28 |
| chr20:33848466-33852203  | 14   | CHMP4B   |
| chr1:234425672-234427766 | 11   | TARBP1   |
| chr1:182874853-182880608 | 1    | DHX9     |
| chr15:67585889-67630927  | 11   | MAP2K5   |
| chr16:30079458-30080069  | 17   | nogene   |
| chr15:51931030-51934354  | 1    | nogene   |
| chr2:10788696-10790833   | 58   | PDIA6    |
| chr6:121223235-121255410 | 20   | TBC1D32  |
| chr1:235450239-235458786 | 1    | B3GALNT2 |
| chr18:1269669-1361221    | 2    | nogene   |
| chr20:44503814-44512994  | 1    | SERINC3  |
| chr9:127050042-127069356 | 12   | RALGPS1  |
| chr6:38577599-38598121   | 126  | BTBD9    |
| chr20:37765196-37779335  | 17   | CTNBL1   |
| chr1:225079206-225123614 | 2    | DNAH14   |
| chr2:151416560-151428922 | 18   | RIF1     |
| chr4:147633764-147634558 | 4    | TMEM184C |
| chr19:46838053-46839578  | 1    | AP2S1    |
| chr19:4475274-4498915    | 1    | HDGFRP2  |
| chr7:102813276-102854860 | 25   | FBXL13   |
| chr3:4303154-4304602     | 18   | nogene   |
| chr2:72718102-72733118   | 1229 | EXOC6B   |
| chr15:50300788-50314670  | 12   | GABPB1   |

|                           |     |          |
|---------------------------|-----|----------|
| chr8:103400464-103407784  | 2   | SLC25A32 |
| chr12:19343322-19348519   | 26  | PLEKHA5  |
| chr19:14563981-14564858   | 4   | TECR     |
| chr20:35653527-35658982   | 36  | CPNE1    |
| chr20:18543018-18554390   | 73  | SEC23B   |
| chr4:183193598-183209025  | 92  | WWC2     |
| chr17:63578469-63579943   | 51  | DCAF7    |
| chr19:13814514-13814865   | 50  | nogene   |
| chr16:47463898-47589102   | 9   | PHKB     |
| chr11:68569747-68596218   | 14  | PPP6R3   |
| chr20:37055552-37065473   | 3   | RBL1     |
| chr13:21301418-21301618   | 2   | MIPEPP3  |
| chr7:157207397-157225539  | 2   | UBE3C    |
| chr4:23105501-23186098    | 3   | nogene   |
| chr15:101010449-101010837 | 10  | LRRK1    |
| chr16:68266592-68273904   | 13  | SLC7A6   |
| chr19:52929075-52929414   | 15  | ZNF321P  |
| chr17:36513428-36515990   | 79  | MYO19    |
| chr5:31451532-31472232    | 14  | DROSHA   |
| chr8:89587890-89596512    | 24  | nogene   |
| chr22:28514756-28517279   | 116 | nogene   |
| chr20:49855437-49864844   | 5   | SLC9A8   |
| chr13:95757643-95763953   | 61  | DNAJC3   |
| chr3:28263290-28298350    | 41  | CMC1     |
| chr5:112234633-112240810  | 21  | EPB41L4A |
| chr4:3154292-3160392      | 3   | HTT      |
| chr1:172924570-172933643  | 8   | nogene   |
| chr4:128077787-128082305  | 19  | LARP1B   |
| chr1:32948221-32949774    | 284 | RNF19B   |
| chr6:26422932-26458718    | 2   | BTN2A3P  |
| chr6:169759837-169768171  | 11  | ERMARD   |
| chr4:147906637-147913139  | 32  | ARHGAP10 |
| chr2:9297299-9327911      | 14  | ASAP2    |
| chr4:47512503-47515670    | 1   | ATP10D   |
| chr12:32713208-32718763   | 13  | DNM1L    |
| chr4:38932234-38935790    | 5   | FAM114A1 |
| chr16:48252130-48270274   | 11  | LONP2    |
| chr12:68824362-68828931   | 9   | MDM2     |
| chr13:23858859-23886506   | 106 | MIPEP    |
| chr1:235990885-236048989  | 1   | NID1     |
| chr9:2667150-2668061      | 49  | nogene   |
| chr17:82748742-82749656   | 1   | nogene   |
| chrX:155415574-155421708  | 1   | nogene   |



|                           |     |           |
|---------------------------|-----|-----------|
| chrX:65060697-65113813    | 7   | nogene    |
| chr1:229477596-229487613  | 1   | NUP133    |
| chr12:53454725-53471807   | 2   | PCBP2     |
| chr1:150332683-150333199  | 19  | PRPF3     |
| chr13:52417991-52426066   | 13  | VPS36     |
| chr13:20821703-20855765   | 11  | XPO4      |
| chr1:33280123-33280457    | 3   | ZNF362    |
| chr1:19183810-19192540    | 2   | UBR4      |
| chr22:38495795-38501280   | 82  | DDX17     |
| chr18:36133237-36145034   | 2   | ELP2      |
| chr6:130022226-130071127  | 1   | L3MBTL3   |
| chr10:34374873-34384254   | 38  | PARD3     |
| chr12:3821872-3863957     | 7   | PARP11    |
| chr20:41133486-41135811   | 6   | PLCG1-AS1 |
| chr8:100259106-100288267  | 21  | RNF19A    |
| chr14:30628208-30639864   | 18  | SCFD1     |
| chr5:77459061-77464809    | 12  | WDR41     |
| chr12:119822819-119850275 | 46  | CIT       |
| chr2:45546731-45562756    | 435 | SRBD1     |
| chr10:12133240-12149961   | 5   | SEC61A2   |
| chrX:108607274-108607578  | 45  | nogene    |
| chr5:139278326-139280058  | 70  | SNHG4     |
| chr16:58716013-58723902   | 12  | GOT2      |
| chr10:96544075-96578320   | 12  | TM9SF3    |
| chr1:1256044-1267992      | 82  | UBE2J2    |
| chr20:21365420-21382057   | 19  | XRN2      |
| chr10:11979056-12004727   | 8   | UPF2      |
| chr12:111418118-111418877 | 276 | SH2B3     |
| chr9:32985970-32989895    | 3   | APTX      |
| chr2:231235223-231296253  | 1   | ARMC9     |
| chr21:39218151-39225197   | 26  | BRWD1     |
| chr17:1436619-1437155     | 49  | CRK       |
| chr11:86250295-86252240   | 21  | EED       |
| chr9:125337017-125337568  | 14  | GAPVD1    |
| chr6:24454014-24467274    | 1   | GPLD1     |
| chr1:100049908-100061949  | 42  | HIAT1     |
| chr9:111378579-111385442  | 48  | KIAA0368  |
| chr18:36195256-36213482   | 1   | MOCOS     |
| chr3:17622647-17672705    | 6   | nogene    |
| chr1:51781163-51782643    | 7   | OSBPL9    |
| chr13:24477700-24478276   | 941 | PARP4     |
| chr1:233135012-233179175  | 90  | PCNXL2    |
| chr12:42387455-42398994   | 36  | PPHLN1    |

|                           |     |         |
|---------------------------|-----|---------|
| chr14:67690211-67693052   | 20  | RDH11   |
| chr4:48369848-48383784    | 147 | SLAIN2  |
| chr14:34597549-34609742   | 14  | SNX6    |
| chr5:113532878-113542503  | 36  | YTHDC2  |
| chr18:14077333-14085076   | 6   | ZNF519  |
| chr6:53071056-53082618    | 10  | FBXO9   |
| chr4:150302624-150325898  | 2   | LRBA    |
| chr18:79410402-79411501   | 141 | NFATC1  |
| chr19:16081019-16101409   | 2   | nogene  |
| chr14:77296163-77304800   | 2   | POMT2   |
| chr8:103766226-103766537  | 9   | RIMS2   |
| chr16:2262277-2264760     | 59  | RNPS1   |
| chr3:196362293-196393619  | 18  | UBXN7   |
| chr4:139336847-139341069  | 79  | NAA15   |
| chr14:52536718-52544371   | 5   | TXND16  |
| chr2:64572945-64585545    | 65  | AFTPH   |
| chr17:29648143-29672129   | 35  | SSH2    |
| chr1:154172907-154176248  | 33  | TPM3    |
| chr5:126561082-126593404  | 3   | ALDH7A1 |
| chr9:86016538-86018821    | 11  | NAA35   |
| chr4:1892165-1904378      | 53  | WHSC1   |
| chr1:92088697-92108001    | 11  | BTBD8   |
| chr7:66210876-66211229    | 17  | nogene  |
| chr14:93186259-93188997   | 11  | TMEM251 |
| chr2:240552913-240555055  | 114 | ANKMY1  |
| chr1:201847278-201848594  | 71  | IPO9    |
| chr6:100512708-100540387  | 2   | ASCC3   |
| chr8:43059091-43069659    | 3   | FNTA    |
| chr14:20346862-20354247   | 3   | PARP2   |
| chr2:181057692-181063041  | 35  | UBE2E3  |
| chr10:103433947-103434975 | 1   | PDCD11  |
| chr8:140717597-140746860  | 4   | PTK2    |
| chr19:49719456-49719935   | 14  | nogene  |
| chr6:83315309-83407901    | 8   | ME1     |
| chr3:161241045-161247330  | 10  | NMD3    |
| chr6:135394775-135411544  | 6   | AHI1    |
| chr4:150870524-150893149  | 8   | LRBA    |
| chr3:52204692-52208247    | 2   | ALAS1   |
| chr10:119526031-119527424 | 23  | RGS10   |
| chr15:74923647-74929232   | 109 | COX5A   |
| chr12:109071611-109073532 | 14  | USP30   |
| chr12:45421070-45421273   | 11  | ANO6    |
| chr19:39820476-39821292   | 16  | nogene  |

|                           |     |           |
|---------------------------|-----|-----------|
| chr12:56568974-56571855   | 109 | RBMS2     |
| chr3:196058283-196065600  | 31  | TFRC      |
| chr7:99491076-99494631    | 11  | ZNF394    |
| chr7:23185069-23196766    | 8   | NUPL2     |
| chr15:32623491-32628802   | 3   | ARHGAP11A |
| chr12:45811417-45821487   | 28  | ARID2     |
| chr22:17808843-17823060   | 20  | MICAL3    |
| chr12:6917037-6918162     | 1   | ENO2      |
| chr7:55978125-55997449    | 1   | GBAS      |
| chr1:224268033-224303857  | 1   | NVL       |
| chr6:128064757-128067792  | 23  | PTPRK     |
| chr12:813641-827262       | 16  | WNK1      |
| chr1:147658959-147659775  | 8   | ACP6      |
| chr19:11205809-11206108   | 2   | nogene    |
| chr7:832504-843520        | 33  | SUN1      |
| chr4:183683974-183685403  | 6   | TRAPPC11  |
| chr12:56666203-56673065   | 53  | PTGES3    |
| chr14:49799474-49800696   | 6   | NEMF      |
| chr17:27303366-27304911   | 13  | WSB1      |
| chr12:71642435-71644318   | 27  | ZFC3H1    |
| chr22:27873737-27897892   | 37  | PITPNB    |
| chr5:131521389-131548190  | 160 | RAPGEF6   |
| chr5:138424074-138425582  | 45  | KDM3B     |
| chr1:45602254-45606591    | 31  | NASP      |
| chr8:115619131-115623758  | 4   | TRPS1     |
| chr7:6017813-6018045      | 7   | AIMP2     |
| chr1:212044659-212047417  | 74  | DTL       |
| chr6:36072872-36075962    | 17  | MAPK14    |
| chr12:111672660-111683307 | 16  | BRAP      |
| chr5:134817495-134819004  | 3   | DDX46     |
| chr4:98099429-98134459    | 2   | STPG2     |
| chr21:15777903-15811210   | 13  | USP25     |
| chr22:37870175-37878171   | 29  | EIF3L     |
| chr22:33761370-33847741   | 78  | LARGE     |
| chr1:236806143-236816543  | 163 | MTR       |
| chr9:33293679-33295427    | 29  | NFX1      |
| chr17:46963696-46965039   | 6   | nogene    |
| chr20:20531686-20546832   | 6   | RALGAPA2  |
| chr7:6578565-6585260      | 20  | ZDHHC4    |
| chr9:146101-172172        | 27  | CBWD1     |
| chr1:93217737-93226449    | 8   | CCDC18    |
| chr3:98881539-98881767    | 437 | DCBLD2    |
| chr17:30780591-30784892   | 13  | nogene    |

|                           |     |          |
|---------------------------|-----|----------|
| chr10:119909040-119918511 | 2   | SEC23IP  |
| chr2:109553086-109593119  | 6   | 10-Sep   |
| chr10:88901655-88905660   | 14  | STAMBPL1 |
| chr10:69185986-69189435   | 21  | SUPV3L1  |
| chr7:141159525-141212704  | 2   | TMEM178B |
| chr21:15762890-15766141   | 290 | USP25    |
| chr10:109907690-109915099 | 11  | XPNPEP1  |
| chr1:62577261-62578966    | 26  | DOCK7    |
| chr18:2577745-2579029     | 15  | NDC80    |
| chrX:74592342-74596000    | 13  | RLIM     |
| chr1:41113282-41151684    | 37  | SCMH1    |
| chr4:42001615-42039053    | 15  | SLC30A9  |
| chr9:98069458-98078347    | 40  | NANS     |
| chr21:46388741-46391376   | 27  | PCNT     |
| chr1:6333476-6349866      | 2   | ACOT7    |
| chr11:129123445-129124894 | 25  | ARHGAP32 |
| chr7:65757982-65759271    | 47  | CCT6P1   |
| chr9:128169051-128180799  | 103 | CIZ1     |
| chr14:54430260-54436437   | 16  | CNIH1    |
| chr11:65998441-65999675   | 35  | EIF1AD   |
| chr5:138513567-138517700  | 3   | ETF1     |
| chr4:53379072-53414722    | 2   | FIP1L1   |
| chr1:10342049-10348733    | 8   | KIF1B    |
| chr19:325634-334542       | 5   | MIER2    |
| chr2:47790926-47796063    | 24  | MSH6     |
| chr9:14102421-14125766    | 20  | NFIB     |
| chr7:2737560-2738181      | 14  | nogene   |
| chr10:27143009-27143446   | 49  | nogene   |
| chr4:94618003-94640450    | 16  | PDLIM5   |
| chr11:48142918-48146963   | 13  | PTPRJ    |
| chr5:171199669-171213738  | 5   | RANBP17  |
| chr1:235152705-235155112  | 94  | RBM34    |
| chr7:29923955-29955360    | 15  | SCRN1    |
| chr5:134682372-134688299  | 16  | SEC24A   |
| chr20:62660411-62661175   | 2   | SLCO4A1  |
| chr1:150492410-150497747  | 29  | TARS2    |
| chr12:123679188-123687035 | 21  | TCTN2    |
| chr6:41891793-41909522    | 2   | USP49    |
| chr7:93252652-93272733    | 7   | VPS50    |
| chr1:108982608-109011718  | 2   | WDR47    |
| chr7:112895568-112915447  | 17  | C7orf60  |
| chr18:13666478-13671973   | 36  | FAM210A  |
| chr15:28260776-28263169   | 57  | HERC2    |

|                           |     |              |
|---------------------------|-----|--------------|
| chr12:110292019-110323072 | 18  | ATP2A2       |
| chr10:12235047-12238485   | 101 | CDC123       |
| chr3:56671599-56673725    | 4   | FAM208A      |
| chr9:124538091-124540187  | 26  | NR6A1        |
| chr1:229460610-229465519  | 11  | NUP133       |
| chr14:70962225-70978648   | 24  | PCNX         |
| chr18:62138242-62148338   | 42  | PIGN         |
| chr19:43655438-43656640   | 27  | PLAUR        |
| chr1:214314761-214318983  | 14  | SMYD2        |
| chr17:37467453-37471137   | 6   | TADA2A       |
| chr1:77858937-77875111    | 4   | FAM73A       |
| chr4:105370836-105438036  | 16  | PPA2         |
| chr1:235246419-235260752  | 69  | ARID4B       |
| chr16:3810602-3854850     | 12  | CREBBP       |
| chr7:39781234-39789544    | 2   | LINC00265    |
| chr22:42299996-42301247   | 16  | nogene       |
| chr2:97490456-97491153    | 34  | nogene       |
| chr2:53897869-53901559    | 2   | PSME4        |
| chr5:748403-837480        | 11  | ZDHHC11      |
| chr4:119460182-119462979  | 47  | LOC645513    |
| chr12:116096668-116237705 | 42  | MED13L       |
| chr16:70280364-70282049   | 14  | nogene       |
| chr1:180984676-181005463  | 78  | STX6         |
| chr19:52001812-52003900   | 2   | ZNF615       |
| chr2:101288972-101295181  | 86  | RNF149       |
| chr7:102397619-102399648  | 18  | LOC100630923 |
| chr4:70942822-70970024    | 4   | MOB1B        |
| chr4:13425109-13426354    | 11  | nogene       |
| chr11:107223209-107225846 | 1   | nogene       |
| chrX:75112885-75114834    | 19  | ABCB7        |
| chr5:179705678-179724783  | 18  | CANX         |
| chr20:35595476-35595754   | 18  | FER1L4       |
| chr1:230178217-230203290  | 42  | GALNT2       |
| chr1:109579203-109582565  | 10  | GNAI3        |
| chr4:82354048-82359639    | 11  | HNRNPD       |
| chr7:8218304-8236005      | 126 | ICA1         |
| chr16:20813189-20816212   | 5   | LOC81691     |
| chr7:1898199-1898390      | 12  | MAD1L1       |
| chr3:179592643-179601790  | 95  | MRPL47       |
| chr3:25764065-25778688    | 19  | NGLY1        |
| chr19:21062605-21063734   | 15  | nogene       |
| chr3:132575771-132605205  | 37  | NPHP3-ACAD11 |
| chr7:154960892-154962458  | 4   | PAXIP1       |

|                           |     |           |
|---------------------------|-----|-----------|
| chr9:111570090-111597432  | 6   | PTGR1     |
| chr8:60572045-60591969    | 156 | RAB2A     |
| chr7:66771882-66775393    | 663 | RABGEF1   |
| chr1:151185505-151185950  | 9   | VPS72     |
| chr7:5213109-5214704      | 16  | WIPI2     |
| chr3:57575547-57584007    | 3   | ARF4      |
| chr3:52760794-52768604    | 4   | NEK4      |
| chr14:102193462-102195120 | 387 | WDR20     |
| chr1:31337174-31348974    | 207 | ZCCHC17   |
| chr16:69608384-69626528   | 3   | NFAT5     |
| chr13:95115921-95170628   | 16  | ABCC4     |
| chr2:203366876-203427269  | 13  | ABI2      |
| chr21:45116932-45134832   | 26  | ADARB1    |
| chr4:147939824-148023413  | 13  | ARHGAP10  |
| chr1:1489203-1490671      | 34  | ATAD3B    |
| chr3:11340644-11348035    | 2   | ATG7      |
| chrX:78012878-78020398    | 32  | ATP7A     |
| chr9:91296020-91325404    | 2   | AUH       |
| chr11:74132843-74133557   | 89  | C2CD3     |
| chrX:73577406-73584572    | 84  | CHIC1     |
| chr20:49063201-49067280   | 19  | CSE1L     |
| chr5:149525044-149529719  | 11  | CSNK1A1   |
| chr12:123617757-123618837 | 29  | DDX55     |
| chr10:12081471-12113064   | 29  | DHTKD1    |
| chr10:422823-486530       | 3   | DIP2C     |
| chr14:73653169-73671597   | 23  | DNAL1     |
| chr22:31463680-31468302   | 2   | EIF4ENIF1 |
| chr2:72465159-72575668    | 2   | EXOC6B    |
| chr16:647544-648099       | 2   | FAM195A   |
| chr4:15612265-15644708    | 12  | FBXL5     |
| chr2:48328560-48346751    | 71  | FOXN2     |
| chr15:50300788-50304133   | 10  | GABPB1    |
| chr1:45634095-45660377    | 2   | GPBP1L1   |
| chr14:67110139-67122377   | 13  | GPHN      |
| chr7:18829160-18874596    | 2   | HDAC9     |
| chr12:112207873-112208630 | 5   | HECTD4    |
| chr1:20744743-20780540    | 37  | HP1BP3    |
| chr7:2567115-2573488      | 79  | IQCE      |
| chr13:30254104-30283791   | 2   | KATNAL1   |
| chr19:5032865-5041251     | 29  | KDM4B     |
| chr9:111410979-111416352  | 18  | KIAA0368  |
| chr7:152205105-152207428  | 9   | KMT2C     |
| chr1:29216004-29216685    | 2   | MECR      |

|                           |     |           |
|---------------------------|-----|-----------|
| chr2:202382857-202386960  | 25  | nogene    |
| chr11:65435066-65437657   | 2   | nogene    |
| chr19:4356452-4356735     | 9   | nogene    |
| chr22:27873737-27914347   | 54  | PITPNB    |
| chr12:19345841-19354002   | 8   | PLEKHA5   |
| chr16:482524-489000       | 9   | RAB11FIP3 |
| chr3:186804276-186804724  | 15  | RFC4      |
| chr6:130154824-130184623  | 5   | SAMD3     |
| chr3:47425484-47435137    | 25  | SCAP      |
| chr1:53014889-53039046    | 12  | SCP2      |
| chr5:134692601-134693933  | 5   | SEC24A    |
| chr16:70556178-70560591   | 5   | SF3B3     |
| chr6:46655842-46671228    | 11  | SLC25A27  |
| chr17:81275968-81284895   | 53  | SLC38A10  |
| chr9:100498764-100509134  | 21  | TMEFF1    |
| chr21:44076551-44080127   | 3   | TRAPPC10  |
| chr14:90780737-90786328   | 23  | TTC7B     |
| chr9:34220907-34242108    | 21  | UBAP1     |
| chr1:12318071-12321964    | 18  | VPS13D    |
| chr4:84896910-84932363    | 54  | WDFY3     |
| chr2:68131276-68134799    | 4   | WDR92     |
| chr1:155674684-155675096  | 12  | YY1AP1    |
| chr3:141368620-141386937  | 113 | ZBTB38    |
| chr12:122477840-122480311 | 19  | ZCCHC8    |
| chr14:73892026-73909430   | 46  | ZNF410    |
| chr9:32480218-32481497    | 4   | DDX58     |
| chr22:23659864-23683867   | 68  | GUSBP11   |
| chr12:121453119-121455536 | 14  | KDM2B     |
| chr1:154225083-154237136  | 42  | UBAP2L    |
| chr15:90593635-90607478   | 11  | CRTC3     |
| chr1:17022607-17024074    | 2   | SDHB      |
| chr10:127031649-127037816 | 50  | DOCK1     |
| chr9:107306378-107311737  | 9   | RAD23B    |
| chr1:8556474-8614686      | 9   | RERE      |
| chr5:179966805-179970506  | 8   | RNF130    |
| chr12:66529830-66541950   | 28  | GRIP1     |
| chr2:65251026-65265175    | 4   | ACTR2     |
| chr22:38521607-38568289   | 122 | DMC1      |
| chr20:63928334-63929525   | 2   | DNAJC5    |
| chr10:73174686-73193593   | 45  | FAM149B1  |
| chr17:51041500-51079704   | 11  | SPAG9     |
| chr8:42906172-42959314    | 18  | HOOK3     |
| chr3:51463113-51483836    | 27  | VPRBP     |

|                           |     |           |
|---------------------------|-----|-----------|
| chr15:58886974-58887540   | 76  | SLTM      |
| chr5:34169026-34182867    | 45  | nogene    |
| chr2:196912881-196923125  | 76  | PGAP1     |
| chr11:13403167-13445181   | 19  | BTBD10    |
| chr5:43675510-43704400    | 190 | NNT       |
| chr10:35148367-35179276   | 26  | CREM      |
| chr16:66821449-66823600   | 3   | NAE1      |
| chr16:23642954-23665728   | 2   | DCTN5     |
| chr3:47818021-47829134    | 2   | DHX30     |
| chr5:80678926-80761678    | 12  | MSH3      |
| chr17:42345558-42348517   | 34  | STAT3     |
| chr2:169872235-169906164  | 2   | UBR3      |
| chr15:59195460-59214720   | 21  | MYO1E     |
| chr3:196814450-196818156  | 89  | PAK2      |
| chr17:36525227-36528202   | 31  | MYO19     |
| chr11:32097143-32098528   | 19  | RCN1      |
| chr1:70221614-70239520    | 3   | SRSF11    |
| chr9:20758089-20770238    | 12  | FOCAD     |
| chr19:3660965-3662001     | 167 | PIP5K1C   |
| chr12:12179809-12187119   | 33  | LRP6      |
| chr18:9117837-9122681     | 3   | NDUFV2    |
| chr5:751132-842674        | 5   | nogene    |
| chr12:100095666-100103951 | 17  | UHRF1BP1L |
| chr10:101803734-101804019 | 6   | MGEA5     |
| chr15:50441348-50449485   | 3   | USP8      |
| chr20:32366383-32376182   | 15  | ASXL1     |
| chr11:678693-681089       | 21  | DEAF1     |
| chr9:137574207-137577603  | 18  | DPH7      |
| chr7:34989883-35018596    | 15  | DPY19L1   |
| chr3:47425484-47428670    | 274 | SCAP      |
| chr20:49151581-49174269   | 61  | STAU1     |
| chr3:41789660-41800293    | 2   | ULK4      |
| chr17:59185053-59197789   | 17  | PRR11     |
| chr15:44392127-44451387   | 34  | nogene    |
| chr12:49991997-49992655   | 274 | RACGAP1   |
| chr10:103174857-103181328 | 5   | NT5C2     |
| chr2:175937343-175964589  | 21  | KIAA1715  |
| chr5:73904221-73911575    | 23  | ARHGEF28  |
| chr2:121525844-121530325  | 9   | CLASP1    |
| chr7:8055432-8071131      | 2   | GLCCI1    |
| chr9:124908376-124912026  | 197 | GOLGA1    |
| chr3:183650295-183672484  | 10  | KLHL24    |
| chrX:154031395-154032557  | 2   | MECP2     |



|                          |     |         |
|--------------------------|-----|---------|
| chr9:36581643-36607673   | 16  | MELK    |
| chr1:198220998-198264235 | 3   | NEK7    |
| chr6:36158647-36196170   | 12  | nogene  |
| chr21:42686191-42699011  | 10  | PDE9A   |
| chr7:103308951-103310475 | 77  | PMPCB   |
| chr9:132296886-132311856 | 26  | SETX    |
| chr1:214401684-214414726 | 21  | PTPN14  |
| chr2:134936840-134947899 | 23  | CCNT2   |
| chr19:52076043-52089002  | 115 | ZNF841  |
| chr6:35410986-35411217   | 17  | PPARD   |
| chr18:163307-192900      | 39  | USP14   |
| chr2:189728659-189744788 | 43  | ANKAR   |
| chr7:5324213-5325248     | 36  | TNRC18  |
| chr19:53423061-53427219  | 3   | nogene  |
| chr7:38817816-38830328   | 3   | VPS41   |
| chr16:1816892-1823037    | 41  | HAGH    |
| chr7:27603137-27649633   | 27  | HIBADH  |
| chr3:136452032-136477412 | 5   | STAG1   |
| chr12:2866392-2868754    | 6   | FOXM1   |
| chr14:88694306-88702632  | 13  | EML5    |
| chr6:143707981-143712183 | 6   | PHACTR2 |
| chr18:9117837-9126907    | 24  | NDUFV2  |
| chr16:29807109-29807681  | 11  | nogene  |
| chr14:31771815-31787873  | 3   | NUBPL   |
| chr7:61111124-6115523    | 261 | USP42   |
| chr4:99034229-99048876   | 18  | METAP1  |
| chr6:141900322-141910011 | 8   | nogene  |
| chr2:118142795-118278471 | 13  | nogene  |
| chr3:170284460-170293508 | 9   | PRKCI   |
| chr18:57731626-57731832  | 30  | ATP8B1  |
| chr2:32377587-32416163   | 8   | BIRC6   |
| chr2:201129728-201140439 | 11  | CFLAR   |
| chr2:197494156-197495376 | 18  | HSPD1   |
| chr11:77374327-77392541  | 37  | PAK1    |
| chr14:29624151-29638904  | 15  | PRKD1   |
| chr8:140890542-140890769 | 32  | PTK2    |
| chr2:150486693-150487455 | 61  | RND3    |
| chr17:78818666-78821061  | 15  | USP36   |
| chr4:87163557-87195690   | 12  | KLHL8   |
| chr21:15799756-15818846  | 12  | USP25   |
| chr13:41865735-41887361  | 16  | VWA8    |
| chr4:39224883-39240334   | 13  | WDR19   |
| chr1:179043714-179050365 | 13  | FAM20B  |

|                           |     |          |
|---------------------------|-----|----------|
| chr4:146442782-146510049  | 21  | SLC10A7  |
| chr20:3907925-3912634     | 143 | PANK2    |
| chr1:10403070-10413251    | 14  | PGD      |
| chr22:38605253-38623279   | 13  | FAM227A  |
| chr22:30963263-30964106   | 13  | nogene   |
| chr20:44921593-44924256   | 5   | PABPC1L  |
| chr2:53936086-53937540    | 21  | PSME4    |
| chr20:18532663-18542402   | 16  | SEC23B   |
| chr19:16679983-16682508   | 31  | TMEM38A  |
| chr2:23880638-23885829    | 15  | ATAD2B   |
| chr10:125824766-125825185 | 20  | nogene   |
| chr4:109506327-109513856  | 7   | SEC24B   |
| chr1:246876036-246877302  | 197 | AHCTF1   |
| chr11:61410937-61429290   | 15  | CPSF7    |
| chr2:3421880-3443891      | 5   | TRAPPC12 |
| chr18:12794383-12859254   | 24  | PTPN2    |
| chr16:11020192-11051641   | 53  | CLEC16A  |
| chr7:128835325-128855314  | 29  | FLNC     |
| chr11:18291441-18292976   | 452 | HPS5     |
| chr13:77217839-77233263   | 5   | MYCBP2   |
| chr4:118282830-118298938  | 14  | PRSS12   |
| chr7:26844029-26854890    | 42  | SKAP2    |
| chr2:26279993-26284204    | 17  | HADHB    |
| chr19:1241660-1242686     | 38  | nogene   |
| chrX:65051461-65113813    | 5   | nogene   |
| chr16:50214220-50217663   | 15  | PAPD5    |
| chr17:78400734-78401057   | 24  | PGS1     |
| chr2:55647346-55662026    | 16  | PNPT1    |
| chrX:84333758-84361612    | 11  | HDX      |
| chr18:9117837-9119590     | 7   | NDUFV2   |
| chr4:147864845-147881932  | 48  | ARHGAP10 |
| chr4:5856142-5861210      | 7   | CRMP1    |
| chr6:632940-637861        | 27  | EXOC2    |
| chr10:68038092-68067217   | 10  | HERC4    |
| chr2:61178980-61186754    | 36  | nogene   |
| chr20:34096656-34105545   | 28  | EIF2S2   |
| chr3:113788712-113789840  | 17  | ATP6V1A  |
| chr10:92648211-92650517   | 12  | KIF11    |
| chr1:220761657-220770556  | 35  | 2-Mar    |
| chr8:127983903-128010444  | 18  | PVT1     |
| chr8:98767242-98774819    | 17  | STK3     |
| chr1:64602805-64641969    | 11  | CACHD1   |
| chr20:34065043-34072330   | 11  | RALY     |

|                           |     |           |
|---------------------------|-----|-----------|
| chr20:6446722-6473655     | 11  | CASC20    |
| chr2:200853902-200855086  | 5   | CLK1      |
| chr17:14033551-14034416   | 30  | COX10-AS1 |
| chr16:58186754-58196844   | 14  | CSNK2A2   |
| chr8:116657214-116658980  | 4   | EIF3H     |
| chr2:20774809-20790398    | 47  | LDAH      |
| chr4:82970326-82979006    | 39  | LIN54     |
| chr4:118620413-118628226  | 78  | LOC729218 |
| chr2:127335869-127339050  | 2   | MAP3K2    |
| chr19:12851933-12858739   | 11  | MAST1     |
| chr4:169576927-169599197  | 5   | NEK1      |
| chrX:84321841-84351815    | 5   | nogene    |
| chr6:129494181-129558166  | 8   | nogene    |
| chr1:110381576-110382205  | 23  | nogene    |
| chr3:197884867-197885322  | 16  | nogene    |
| chr13:24477700-24486305   | 26  | PARP4     |
| chr6:149789953-149796500  | 8   | PCMT1     |
| chr3:138663905-138665203  | 6   | PIK3CB    |
| chr6:43024984-43025329    | 12  | RRP36     |
| chr5:139121034-139127853  | 126 | SIL1      |
| chr7:129202044-129203589  | 11  | SMO       |
| chr7:127976996-127991056  | 14  | SND1      |
| chr1:48395266-48413151    | 35  | SPATA6    |
| chr5:179833031-179833782  | 11  | SQSTM1    |
| chr1:36358238-36361340    | 4   | STK40     |
| chr6:34867224-34867616    | 19  | UHRF1BP1  |
| chrX:155895622-155900587  | 2   | VAMP7     |
| chr2:9344531-9344800      | 14  | ASAP2     |
| chr13:49196876-49198574   | 11  | FNDC3A    |
| chr7:131463216-131478677  | 8   | MKLN1     |
| chr2:233449958-233452060  | 24  | DGKD      |
| chr17:42837648-42839380   | 57  | PSME3     |
| chr22:45692995-45702847   | 13  | ATXN10    |
| chr14:103398950-103405267 | 346 | MARK3     |
| chr11:66486539-66488007   | 58  | DPP3      |
| chr11:857693-861423       | 33  | nogene    |
| chr12:31992377-31996935   | 2   | KIAA1551  |
| chr1:120741807-120793496  | 50  | nogene    |
| chr1:151025514-151028944  | 4   | PRUNE     |
| chr10:7769215-7780307     | 17  | KIN       |
| chr2:241654545-241668685  | 5   | ATG4B     |
| chr5:6623213-6625669      | 43  | NSUN2     |
| chrX:2211488-2212828      | 15  | nogene    |

|                           |     |          |
|---------------------------|-----|----------|
| chr13:28197184-28239696   | 14  | PAN3     |
| chr2:241324215-241336098  | 12  | 2-Sep    |
| chr3:47867245-47872100    | 19  | MAP4     |
| chrX:131755597-131756709  | 3   | FIRRE    |
| chr1:173733712-173734286  | 30  | KLHL20   |
| chr5:134674614-134676125  | 38  | SEC24A   |
| chr10:22326430-22328698   | 14  | BMI1     |
| chr6:31889227-31896989    | 3   | EHMT2    |
| chr10:32919884-32935558   | 18  | ITGB1    |
| chr19:5016256-5041251     | 39  | KDM4B    |
| chr9:34269256-34306441    | 3   | KIF24    |
| chr9:27455132-27455748    | 15  | MOB3B    |
| chr14:67269700-67303599   | 122 | MPP5     |
| chr8:140830471-140864399  | 605 | PTK2     |
| chr2:73985979-74080591    | 12  | TET3     |
| chr12:2909528-2922402     | 31  | TULP3    |
| chr2:238025341-238035940  | 20  | UBE2F    |
| chr9:133806080-133812216  | 124 | VAV2     |
| chr9:86317218-86322475    | 15  | ZCCHC6   |
| chr13:24477700-24501834   | 34  | PARP4    |
| chr17:59015609-59017424   | 19  | TRIM37   |
| chr8:125007390-125009343  | 4   | SQLE     |
| chr22:41893116-41894937   | 8   | SREBF2   |
| chr12:123609938-123616603 | 14  | DDX55    |
| chr2:191360630-191364276  | 14  | MYO1B    |
| chr7:36425701-36443862    | 2   | ANLN     |
| chr17:81667728-81672802   | 7   | CCDC137  |
| chr14:34533443-34536275   | 3   | EAPP     |
| chr1:231270757-231276196  | 3   | GNPAT    |
| chr6:79042842-79060818    | 669 | PHIP     |
| chr10:7367648-7381949     | 46  | SFMBT2   |
| chr10:94474667-94497172   | 3   | TBC1D12  |
| chr13:60439687-60494575   | 5   | TDRD3    |
| chr9:14639895-14674385    | 59  | ZDHHC21  |
| chr12:9680922-9694969     | 8   | CLEC2D   |
| chr6:83934594-83936376    | 2   | CYB5R4   |
| chr7:92448751-92454685    | 4   | GATAD1   |
| chrX:46984883-46998277    | 11  | JADE3    |
| chr10:93347616-93349969   | 28  | MYOF     |
| chr11:20080063-20083179   | 8   | NAV2     |
| chr17:319419-321415       | 74  | RPH3AL   |
| chr14:54737023-54776540   | 2   | SAMD4A   |
| chr22:40777039-40799083   | 17  | SLC25A17 |

|                           |      |          |
|---------------------------|------|----------|
| chr1:77725621-77736158    | 2    | USP33    |
| chr8:42966472-42968214    | 19   | HOOK3    |
| chr3:47670657-47676782    | 54   | SMARCC1  |
| chr10:79118914-79216274   | 3    | ZMIZ1    |
| chr2:9535833-9543285      | 42   | ADAM17   |
| chr2:30942200-30955977    | 13   | GALNT14  |
| chr5:6737509-6739852      | 26   | PAPD7    |
| chr3:170291853-170293508  | 99   | PRKCI    |
| chr15:50637421-50639548   | 52   | TRPM7    |
| chr21:15777903-15805258   | 19   | USP25    |
| chr7:5216562-5218014      | 3    | WIPI2    |
| chr18:79126266-79207012   | 53   | ATP9B    |
| chr14:100262303-100274758 | 17   | YY1      |
| chr5:65170616-65188220    | 20   | ADAMTS6  |
| chr8:123380528-123381493  | 52   | ATAD2    |
| chr14:102999564-103008555 | 2    | CDC42BPB |
| chr1:212863724-212864519  | 11   | FLVCR1   |
| chr16:50078740-50084651   | 4    | HEATR3   |
| chr10:92508727-92537550   | 1    | IDE      |
| chr15:94440175-94458246   | 2    | MCTP2    |
| chr3:179362357-179367592  | 1    | MFN1     |
| chr4:159186641-159241368  | 11   | nogene   |
| chr16:69314617-69315069   | 26   | nogene   |
| chr16:19706591-19712772   | 11   | nogene   |
| chr10:45862985-45964871   | 11   | PARGP1   |
| chr2:88729277-88738076    | 35   | RPIA     |
| chr13:26612960-26613538   | 1    | WASF3    |
| chr2:205158721-205193320  | 28   | PARD3B   |
| chr18:9524593-9525851     | 413  | RALBP1   |
| chr11:94830049-94831541   | 10   | AMOTL1   |
| chr3:98849460-98881767    | 571  | DCBLD2   |
| chr5:60887439-60904873    | 12   | ERCC8    |
| chr1:45642426-45655319    | 6    | GPBP1L1  |
| chr8:74244528-74245175    | 37   | JPH1     |
| chr13:79520809-79539775   | 9    | NDFIP2   |
| chr18:9117837-9124983     | 45   | NDUFV2   |
| chr5:10213490-10227647    | 188  | FAM173B  |
| chr11:29383255-29384112   | 425  | nogene   |
| chr15:43469857-43477759   | 14   | TP53BP1  |
| chr17:81084831-81086580   | 17   | BAIAP2   |
| chr12:111552279-111555919 | 2936 | ATXN2    |
| chr13:31274508-31286819   | 8    | B3GLCT   |
| chr10:68442916-68446413   | 21   | DNA2     |

|                           |     |          |
|---------------------------|-----|----------|
| chr1:16294782-16315435    | 26  | FBXO42   |
| chr13:30630834-30647057   | 12  | USPL1    |
| chr8:140818276-140864399  | 480 | PTK2     |
| chr1:227193785-227254155  | 48  | CDC42BPA |
| chr12:42355160-42393689   | 4   | PPHLN1   |
| chr8:123344883-123349444  | 4   | ATAD2    |
| chr1:85350414-85361854    | 2   | DDAH1    |
| chr1:112610840-112616895  | 43  | ST7L     |
| chr6:44932652-45020632    | 2   | SUPT3H   |
| chr4:48556977-48557712    | 21  | FRYL     |
| chr15:55223888-55238491   | 7   | RAB27A   |
| chr4:22389087-22438420    | 1   | ADGRA3   |
| chr7:151117094-151118632  | 78  | AGAP3    |
| chr5:115864566-115870128  | 2   | AP3S1    |
| chr14:103571622-103587364 | 7   | APOPT1   |
| chr19:43625077-43627790   | 2   | CADM4    |
| chr12:28305648-28391411   | 186 | CCDC91   |
| chr10:12215739-12237266   | 11  | CDC123   |
| chr17:66167500-66183307   | 1   | CEP112   |
| chr12:119775785-119776842 | 27  | CIT      |
| chr12:38829378-38848662   | 34  | CPNE8    |
| chr5:138886211-138904441  | 15  | CTNNA1   |
| chr9:123583168-123879021  | 16  | DENND1A  |
| chr13:98897487-98904706   | 10  | DOCK9    |
| chr1:92624175-92639237    | 1   | EVI5     |
| chr15:65551675-65564342   | 17  | HACD3    |
| chr9:19070218-19096769    | 74  | HAUS6    |
| chr7:18585280-18666476    | 33  | HDAC9    |
| chr8:42964310-42986795    | 1   | HOOK3    |
| chr12:12179809-12203400   | 34  | LRP6     |
| chr1:84952242-84965708    | 73  | MCOLN2   |
| chr14:70584816-70597777   | 29  | MED6     |
| chr2:86206105-86207327    | 33  | MRPL35   |
| chr20:62195801-62199257   | 26  | MTG2     |
| chr11:66652276-66657259   | 24  | nogene   |
| chrX:126243345-126250294  | 86  | nogene   |
| chr22:25509182-25510949   | 1   | nogene   |
| chr5:85805306-85856126    | 1   | nogene   |
| chrX:131743095-131785258  | 33  | nogene   |
| chr5:41840450-41862750    | 53  | OXCT1    |
| chr3:53185926-53186340    | 1   | PRKCD    |
| chr12:120221622-120224377 | 15  | PXN      |
| chr5:168500590-168518062  | 24  | RARS     |

|                           |     |          |
|---------------------------|-----|----------|
| chr14:69453240-69455866   | 7   | SLC39A9  |
| chr8:125003175-125007487  | 45  | SQLE     |
| chr22:46912073-46997709   | 10  | TBC1D22A |
| chr17:7465710-7467327     | 18  | ZBTB4    |
| chr19:9652952-9653881     | 32  | ZNF562   |
| chr19:37771563-37773751   | 3   | ZNF573   |
| chr5:173944966-173953272  | 30  | CPEB4    |
| chr6:36974060-36974899    | 28  | nogene   |
| chr12:8120907-8138253     | 2   | nogene   |
| chr15:64970113-64983593   | 2   | SPG21    |
| chr1:24649970-24651612    | 9   | SRRM1    |
| chr3:195878252-195888606  | 109 | TNK2     |
| chr3:39069642-39084741    | 33  | WDR48    |
| chr2:61522610-61526521    | 439 | XPO1     |
| chr16:23442476-23445961   | 32  | COG7     |
| chr2:43794456-43805246    | 15  | DYNC2LI1 |
| chr16:89305205-89317075   | 46  | ANKRD11  |
| chr7:43595900-43596113    | 23  | STK17A   |
| chr3:67528131-67609596    | 11  | SUCLG2   |
| chr13:41761127-41787543   | 10  | VWA8     |
| chr5:37437921-37516590    | 11  | WDR70    |
| chr18:21656860-21664230   | 27  | ABHD3    |
| chr7:131375423-131429145  | 38  | MKLN1    |
| chr12:104126113-104128517 | 3   | NFYB     |
| chr20:4899554-4902558     | 11  | SLC23A2  |
| chr16:50749575-50754424   | 11  | CYLD     |
| chr8:108214606-108229195  | 56  | EIF3E    |
| chr11:44107682-44114301   | 31  | EXT2     |
| chr17:75321658-75326020   | 2   | GRB2     |
| chr6:82225476-82234255    | 2   | IBTK     |
| chr16:25161101-25175034   | 12  | LCMT1    |
| chrX:131364748-131369052  | 354 | nogene   |
| chr9:131174086-131178410  | 14  | NUP214   |
| chr6:13632369-13644729    | 298 | RANBP9   |
| chr19:45022052-45025737   | 29  | RELB     |
| chr4:84702352-84721572    | 3   | WDFY3    |
| chr5:38527154-38530666    | 12  | LIFR     |
| chr1:94498601-94499614    | 21  | ABCD3    |
| chr11:62581105-62581701   | 12  | TUT1     |
| chr3:47408490-47408754    | 12  | PTPN23   |
| chr6:107039748-107044332  | 12  | C6orf203 |
| chr5:149505446-149550181  | 15  | CSNK1A1  |
| chr12:108541329-108541648 | 24  | nogene   |

|                           |     |           |
|---------------------------|-----|-----------|
| chr19:40363701-40364080   | 3   | nogene    |
| chr9:131430089-131455166  | 29  | PRRC2B    |
| chr17:21006895-21011309   | 5   | USP22     |
| chr3:47113875-47126663    | 17  | SETD2     |
| chr1:12299201-12308641    | 93  | VPS13D    |
| chr16:58174450-58186856   | 25  | CSNK2A2   |
| chr5:172274432-172274795  | 16  | nogene    |
| chr6:7176307-7176773      | 37  | RREB1     |
| chr15:50449399-50462322   | 13  | USP8      |
| chr6:157036834-157084905  | 94  | ARID1B    |
| chr21:43420029-43420233   | 14  | SIK1      |
| chr9:36603989-36643083    | 2   | MELK      |
| chr7:8003907-8022569      | 9   | GLCCI1    |
| chr9:96541825-96565483    | 20  | CDC14B    |
| chr18:79096475-79207012   | 17  | ATP9B     |
| chr1:75803730-75810807    | 2   | MSH4      |
| chr13:51719197-51751415   | 2   | WDFY2     |
| chr22:31455851-31463133   | 26  | EIF4ENIF1 |
| chr12:69258998-69262562   | 24  | CPSF6     |
| chr10:119041993-119044142 | 38  | EIF3A     |
| chr2:135529637-135530132  | 18  | nogene    |
| chr16:88598177-88609051   | 18  | ZC3H18    |
| chr16:11763477-11775013   | 13  | ZC3H7A    |
| chr1:155521099-155521618  | 178 | ASH1L     |
| chr8:38114191-38135766    | 2   | ASH2L     |
| chr17:61015750-61040892   | 3   | BCAS3     |
| chr15:73702254-73703086   | 3   | CD276     |
| chr19:32915336-32926273   | 58  | CEP89     |
| chr3:33626987-33644903    | 23  | CLASP2    |
| chr17:43489448-43493886   | 11  | DHX8      |
| chr2:54816786-54829477    | 10  | EML6      |
| chr6:53878992-53913969    | 11  | LRRC1     |
| chr17:61960866-61962971   | 15  | MED13     |
| chr17:45081643-45086652   | 84  | NMT1      |
| chr16:71684475-71714801   | 4   | PHLPP2    |
| chr11:63590099-63598163   | 12  | PLA2G16   |
| chr7:66775226-66797506    | 2   | RABGEF1   |
| chr3:128081229-128087808  | 10  | RUVBL1    |
| chr2:200329430-200440784  | 2   | SPATS2L   |
| chr7:100868494-100868866  | 4   | TRIP6     |
| chr10:69483690-69495689   | 2   | TSPAN15   |
| chr19:17153966-17157038   | 27  | MYO9B     |
| chr11:68803999-68812576   | 63  | CPT1A     |



|                           |     |          |
|---------------------------|-----|----------|
| chr5:108224120-108348530  | 16  | FBXL17   |
| chr17:47618349-47619784   | 19  | NPEPPS   |
| chr7:6580554-6583431      | 15  | ZDHC4    |
| chr15:65497863-65507355   | 11  | DPP8     |
| chr18:36213365-36220217   | 8   | MOCOS    |
| chr17:78079394-78087093   | 16  | TNRC6C   |
| chr7:129657342-129727365  | 9   | NRF1     |
| chr9:20715321-20823115    | 31  | FOCAD    |
| chr1:93903764-93904588    | 17  | GCLM     |
| chr18:70047970-70065922   | 4   | RTTN     |
| chr2:99206633-99216114    | 6   | nogene   |
| chr3:63912587-63952483    | 20  | ATXN7    |
| chr12:123616510-123618837 | 14  | DDX55    |
| chr13:110622215-110624279 | 70  | CARKD    |
| chr15:36691684-36709961   | 41  | C15orf41 |
| chr19:5653114-5654456     | 55  | SAFB     |
| chr9:15177696-15187035    | 13  | TTC39B   |
| chr1:235480053-235494828  | 649 | B3GALNT2 |
| chr17:63805070-63809659   | 7   | DDX42    |
| chr12:64108931-64115893   | 31  | SRGAP1   |
| chrX:109668100-109669173  | 17  | ACSL4    |
| chr6:38577599-38600008    | 8   | BTBD9    |
| chr21:46314715-46315547   | 20  | C21orf58 |
| chr11:74138719-74139828   | 7   | C2CD3    |
| chr5:131695404-131699002  | 12  | FNIP1    |
| chr1:99747293-99749001    | 19  | FRRS1    |
| chr19:325634-327989       | 17  | MIER2    |
| chr15:25019026-25020761   | 6   | nogene   |
| chr7:140054661-140058034  | 17  | PARP12   |
| chr14:70988566-70995925   | 179 | PCNX     |
| chr11:68551120-68564432   | 100 | PPP6R3   |
| chr7:66797373-66799414    | 3   | RABGEF1  |
| chr10:94441895-94474783   | 301 | TBC1D12  |
| chr10:49945031-49973142   | 13  | TIMM23B  |
| chr15:42775134-42840433   | 6   | TTBK2    |
| chr5:176970741-176982623  | 12  | UIMC1    |
| chr8:130236921-130361771  | 11  | ASAP1    |
| chr22:45692995-45740538   | 17  | ATXN10   |
| chr7:16682779-16697061    | 31  | BZW2     |
| chr2:201133028-201149835  | 18  | CFLAR    |
| chr13:42953947-42970670   | 6   | EPSTI1   |
| chr7:4754458-4757187      | 18  | FOXK1    |
| chr1:230243305-230265367  | 11  | GALNT2   |

|                          |     |         |
|--------------------------|-----|---------|
| chr10:32021021-32021287  | 34  | KIF5B   |
| chr3:17586352-17672705   | 2   | nogene  |
| chr2:202290322-202295837 | 69  | NOP58   |
| chr19:49864438-49865126  | 11  | PNKP    |
| chr19:52215778-52216663  | 3   | PPP2R1A |
| chr6:42989610-43006606   | 51  | PPP2R5D |
| chr3:61748877-61828817   | 30  | PTPRG   |
| chr4:13376544-13381594   | 2   | RAB28   |
| chr6:36524340-36540204   | 20  | STK38   |
| chr13:47948939-47954557  | 15  | SUCLA2  |
| chr14:64055943-64065650  | 16  | SYNE2   |
| chr10:94493364-94511654  | 19  | TBC1D12 |
| chr22:42169846-42215341  | 4   | TCF20   |
| chr5:176943334-176963843 | 2   | UIMC1   |
| chr8:100923954-100925039 | 114 | YWHAZ   |
| chr8:43158574-43173743   | 11  | HGSNAT  |
| chr15:85113872-85121014  | 49  | PDE8A   |
| chr14:58252118-58257998  | 5   | PSMA3   |
| chr19:1816224-1816569    | 14  | REXO1   |
| chr17:48910807-48922937  | 9   | UBE2Z   |
| chr4:142108092-142145996 | 2   | INPP4B  |
| chr17:45437823-45450763  | 2   | PLEKHM1 |
| chr3:50099981-50105709   | 25  | RBM5    |
| chr7:99597935-99610601   | 16  | nogene  |
| chr12:31433154-31442925  | 20  | DENND5B |
| chr17:39297126-39303639  | 12  | FBXL20  |
| chr4:169537808-169556095 | 76  | NEK1    |
| chr6:110997182-111015856 | 36  | RPF2    |
| chr3:81642780-81670953   | 12  | GBE1    |
| chr3:194433771-194437573 | 16  | ATP13A3 |
| chr5:32143748-32170768   | 28  | GOLPH3  |
| chr5:62437273-62476753   | 11  | IPO11   |
| chr3:51590366-51590559   | 28  | RAD54L2 |
| chr12:51662763-51663093  | 27  | SCN8A   |
| chr7:67067284-67183236   | 14  | TYW1    |
| chr19:14695009-14706773  | 14  | ZNF333  |
| chr22:25509182-25510908  | 34  | nogene  |
| chr5:78165609-78216237   | 15  | AP3B1   |
| chr17:83035766-83048785  | 26  | B3GNTL1 |
| chr21:41226265-41257326  | 74  | BACE2   |
| chr4:142193086-142209026 | 12  | INPP4B  |
| chr14:54737023-54737287  | 32  | SAMD4A  |
| chr3:16286341-16303592   | 72  | OXNAD1  |

|                           |     |          |
|---------------------------|-----|----------|
| chr7:4983670-4996798      | 10  | RNF216P1 |
| chr4:15636493-15644708    | 16  | FBXL5    |
| chr9:65682765-65720092    | 18  | CBWD5    |
| chr10:68394074-68401737   | 30  | RUFY2    |
| chr17:81845870-81859387   | 236 | P4HB     |
| chr3:11340644-11342279    | 13  | ATG7     |
| chr10:102006539-102040125 | 2   | C10orf76 |
| chr1:28690103-28693045    | 14  | GMEB1    |
| chr5:79396822-79457018    | 9   | HOMER1   |
| chr3:188758631-188760282  | 25  | LPP      |
| chrX:75604917-75624888    | 3   | nogene   |
| chr6:143687678-143712183  | 15  | PHACTR2  |
| chr8:10831664-10834775    | 7   | PINX1    |
| chr3:183717650-183722136  | 11  | YEATS2   |
| chr1:150927703-150930118  | 25  | SETDB1   |
| chr12:26415302-26443650   | 5   | ITPR2    |
| chr7:117099761-117170976  | 14  | ST7      |
| chr17:36986616-37031685   | 2   | AATF     |
| chr17:61776400-61784424   | 2   | BRIP1    |
| chr10:68044403-68073686   | 2   | HERC4    |
| chr12:104381785-104387984 | 24  | nogene   |
| chr2:138559021-138564993  | 15  | SPOPL    |
| chr12:109516764-109526416 | 2   | UBE3B    |
| chr6:82957311-83024038    | 3   | UBE3D    |
| chr15:34890214-34897705   | 14  | AQR      |
| chr10:115461974-115469329 | 11  | ATRNL1   |
| chr11:68363746-68365702   | 13  | LRP5     |
| chr3:131462748-131471279  | 52  | MRPL3    |
| chr19:55341793-55343997   | 2   | SUV420H2 |
| chr10:121790168-121870038 | 20  | ATE1     |
| chr11:86250295-86264263   | 11  | EED      |
| chr7:90372154-90378211    | 40  | GTPBP10  |
| chr11:43750910-43840064   | 2   | HSD17B12 |
| chr16:1747028-1748720     | 34  | MAPK8IP3 |
| chr14:60115718-60125823   | 275 | PCNXL4   |
| chr17:32446944-32464578   | 5   | PSMD11   |
| chr14:102701277-102721084 | 3   | RCOR1    |
| chr3:134175608-134178073  | 13  | RYK      |
| chr1:9553625-9573412      | 27  | SLC25A33 |
| chr7:140355667-140358785  | 303 | SLC37A3  |
| chr16:69235747-69260260   | 12  | SNTB2    |
| chr11:68185780-68190152   | 60  | SUV420H1 |
| chr22:39374315-39376197   | 13  | SYNGR1   |

|                           |     |         |
|---------------------------|-----|---------|
| chr8:53993667-54000050    | 26  | TCEA1   |
| chr3:196368027-196372042  | 35  | UBXN7   |
| chr16:21968627-21976243   | 98  | UQCRC2  |
| chr10:11597630-11601980   | 76  | USP6NL  |
| chr10:1072115-1105267     | 8   | WDR37   |
| chr20:13528432-13630152   | 4   | TASP1   |
| chr7:139715931-139717015  | 971 | HIPK2   |
| chr10:63380317-63404965   | 48  | JMJD1C  |
| chr11:45979759-45979966   | 3   | PHF21A  |
| chr10:127052680-127061776 | 38  | DOCK1   |
| chr3:32128075-32146734    | 19  | GPD1L   |
| chr9:27044741-27048274    | 2   | IFT74   |
| chr16:21617864-21625115   | 2   | METTL9  |
| chr20:62009051-62014707   | 17  | TAF4    |
| chr1:33013206-33014594    | 45  | AK2     |
| chr22:36493632-36496208   | 4   | FOXRED2 |
| chr19:42236605-42240142   | 12  | GSK3A   |
| chr1:20749722-20773610    | 233 | HP1BP3  |
| chr18:6237963-6264038     | 41  | L3MBTL4 |
| chr19:48802714-48803275   | 13  | nogene  |
| chr7:44624316-44647759    | 32  | OGDH    |
| chr11:61437624-61438362   | 35  | SDHAF2  |
| chr1:109342013-109345881  | 43  | SORT1   |
| chr3:129827802-129880559  | 21  | TMCC1   |
| chr12:104331533-104334332 | 3   | TXNRD1  |
| chr1:246735974-246760227  | 2   | SCCPDH  |
| chr7:32812756-32823221    | 10  | nogene  |
| chr1:180075021-180084178  | 11  | CEP350  |
| chr5:50750150-50788589    | 11  | PARP8   |
| chr10:119577079-119580538 | 11  | TIAL1   |
| chr3:49305714-49325845    | 11  | USP4    |
| chr10:35188199-35207051   | 6   | CREM    |
| chr16:4821379-4832912     | 5   | GLYR1   |
| chr12:32598496-32601423   | 3   | FGD4    |
| chr9:110941420-110942168  | 81  | LPAR1   |
| chr3:196806578-196807914  | 456 | PAK2    |
| chr21:34859473-34880713   | 3   | RUNX1   |
| chrX:65366637-65499989    | 11  | ZC3H12B |
| chr20:48952704-48963898   | 47  | ARFGEF2 |
| chr6:32120770-32121348    | 33  | ATF6B   |
| chr21:39232176-39250889   | 23  | BRWD1   |
| chr4:80301282-80362884    | 65  | C4orf22 |
| chr19:7605225-7608264     | 1   | CAMSAP3 |

|                           |     |          |
|---------------------------|-----|----------|
| chr1:91501653-91515876    | 1   | CDC7     |
| chr16:58559803-58560362   | 101 | CNOT1    |
| chr8:67074242-67086110    | 18  | CSPP1    |
| chr3:182947237-182964049  | 13  | DCUN1D1  |
| chr1:21236745-21238244    | 12  | ECE1     |
| chr6:104843222-104852371  | 14  | HACE1    |
| chr7:105038125-105066807  | 12  | KMT2E    |
| chr5:113122683-113260948  | 1   | MCC      |
| chr5:113101738-113102316  | 1   | MCC      |
| chr10:13188880-13192568   | 11  | MCM10    |
| chr22:39403827-39404132   | 31  | nogene   |
| chr8:58601284-58603386    | 23  | NSMAF    |
| chr1:174272413-174305127  | 63  | RABGAP1L |
| chr4:109449416-109463644  | 11  | SEC24B   |
| chrX:119410189-119419344  | 25  | SLC25A43 |
| chr1:10130499-10130813    | 12  | UBE4B    |
| chr14:93219211-93220411   | 27  | UBR7     |
| chr12:121966954-121975685 | 1   | WDR66    |
| chr19:51581390-51581882   | 1   | ZNF175   |
| chr9:106972004-106974273  | 4   | ZNF462   |
| chr15:68141945-68153695   | 74  | PIAS1    |
| chr1:151224247-151234496  | 10  | PIP5K1A  |
| chr16:68274690-68287871   | 78  | SLC7A6   |
| chr17:1354210-1365058     | 14  | YWHAE    |
| chr1:243304712-243330692  | 26  | SDCCAG8  |
| chr1:213072869-213104569  | 24  | RPS6KC1  |
| chr9:36233919-36249397    | 30  | GNE      |
| chr14:80862756-80900029   | 83  | CEP128   |
| chr12:267111172-26725765  | 47  | ITPR2    |
| chr12:8713810-8754093     | 33  | RIMKLB   |
| chr11:61437624-61438120   | 8   | SDHAF2   |
| chr17:37411268-37444768   | 25  | TADA2A   |
| chr10:11509594-11527567   | 135 | USP6NL   |
| chr1:225412453-225415332  | 28  | LBR      |
| chr3:197015364-197016369  | 30  | MF12     |
| chr1:154234590-154235291  | 33  | UBAP2L   |
| chr2:32377587-32395593    | 283 | BIRC6    |
| chr10:102351255-102353654 | 4   | GBF1     |
| chr9:33351559-33370014    | 3   | NFX1     |
| chr14:102208602-102209862 | 7   | WDR20    |
| chrX:49113550-49113938    | 17  | GPKOW    |
| chr9:111383210-111391824  | 9   | KIAA0368 |
| chr4:94573350-94586444    | 53  | PDLIM5   |

|                           |      |          |
|---------------------------|------|----------|
| chr10:21571974-21595440   | 23   | MLLT10   |
| chr16:2756333-2757945     | 52   | SRRM2    |
| chr2:119920068-119934958  | 32   | PTPN4    |
| chr17:73202999-73203793   | 48   | COG1     |
| chr1:155821473-155822476  | 1    | GON4L    |
| chr5:160035139-160049662  | 21   | TTC1     |
| chrX:155895622-155919880  | 16   | VAMP7    |
| chr22:45700281-45718493   | 65   | ATXN10   |
| chr7:2213211-2225550      | 24   | MAD1L1   |
| chr5:138951170-138951884  | 14   | SIL1     |
| chr8:67299208-67302466    | 166  | ARFGEF1  |
| chr21:39269898-39270433   | 13   | BRWD1    |
| chr1:109661164-109690564  | 8    | GSTM4    |
| chr10:127031649-127043164 | 34   | DOCK1    |
| chr1:29035825-29039426    | 73   | EPB41    |
| chr3:186079816-186105942  | 25   | ETV5     |
| chr3:155922186-155925366  | 7    | GMPS     |
| chr15:28245880-28257261   | 24   | HERC2    |
| chr7:24804314-24834736    | 6    | OSBPL3   |
| chr15:100327375-100331054 | 13   | ADAMTS17 |
| chr2:233434379-233438379  | 33   | DGKD     |
| chr20:5958527-5972037     | 32   | MCM8     |
| chr8:70213902-70216764    | 479  | NCOA2    |
| chr10:18642475-18648645   | 4    | NSUN6    |
| chr20:63775677-63775962   | 59   | ZBTB46   |
| chr10:99955213-99972134   | 11   | DNMBP    |
| chr21:34102834-34142707   | 13   | nogene   |
| chr1:61683445-61723786    | 3    | nogene   |
| chr1:40260838-40268535    | 5    | ZMPSTE24 |
| chr9:85962012-85978381    | 2    | NAA35    |
| chr2:121605700-121606180  | 505  | CLASP1   |
| chrX:53561755-53562244    | 29   | HUWE1    |
| chr15:40386361-40393593   | 1    | KNSTRN   |
| chr11:47308590-47315327   | 1    | MADD     |
| chr8:140275657-140311374  | 2    | TRAPPC9  |
| chr1:155668626-155670464  | 1    | YY1AP1   |
| chr19:1032391-1032696     | 129  | CNN2     |
| chr17:5460938-5463689     | 55   | DHX33    |
| chr3:168309304-168314176  | 17   | EGFEM1P  |
| chr10:69000423-69011015   | 9    | KIAA1279 |
| chr4:3086938-3107423      | 1517 | HTT      |
| chr5:37114959-37120340    | 20   | C5orf42  |
| chr10:96544075-96565426   | 65   | TM9SF3   |

|                           |     |           |
|---------------------------|-----|-----------|
| chr15:42817031-42840433   | 41  | TTBK2     |
| chr3:138681966-138694907  | 6   | PIK3CB    |
| chr20:25209848-25218614   | 11  | ENTPD6    |
| chr1:236859832-236863554  | 89  | MTR       |
| chr9:33582565-33583338    | 10  | nogene    |
| chr8:124320085-124327421  | 20  | TMEM65    |
| chr3:183761506-183762279  | 38  | YEATS2    |
| chr19:10795371-10798572   | 39  | DNM2      |
| chr17:40053297-40053657   | 7   | MED24     |
| chr9:132342689-132349435  | 24  | SETX      |
| chr5:138559863-138567722  | 39  | HSPA9     |
| chr16:5027134-5028185     | 11  | NAGPA     |
| chr5:143041815-143057747  | 2   | ARHGAP26  |
| chr1:21247220-21258839    | 6   | ECE1      |
| chr20:25413789-25441776   | 31  | GIN51     |
| chr7:6414549-6414916      | 10  | nogene    |
| chr19:55098783-55103568   | 403 | PPP1R12C  |
| chr15:34882501-34886661   | 20  | AQR       |
| chr7:13906429-13911307    | 18  | ETV1      |
| chr22:29636750-29642285   | 370 | NF2       |
| chr9:100457757-100471231  | 20  | nogene    |
| chr13:95970111-95999307   | 132 | UGGT2     |
| chr7:65964322-65967907    | 227 | GUSB      |
| chr16:23102318-23108781   | 3   | USP31     |
| chr12:130821688-130827267 | 6   | STX2      |
| chr3:129260400-129260597  | 37  | COPG1     |
| chr10:124706635-124706887 | 82  | FAM53B    |
| chr1:35470862-35479212    | 42  | KIAA0319L |
| chr22:28296197-28360201   | 28  | TTC28     |
| chr10:125807412-125816525 | 14  | UROS      |
| chr11:75851882-75888903   | 19  | UVRAG     |
| chr9:35228014-35237826    | 11  | UNC13B    |
| chr12:122577671-122582985 | 15  | KNTC1     |
| chr22:25455711-25459515   | 28  | CRYBB2P1  |
| chr7:754588-763974        | 30  | DNAAF5    |
| chr4:152329671-152337936  | 15  | FBXW7     |
| chr11:64685645-64685947   | 11  | NRXN2     |
| chr7:24804314-24809951    | 17  | OSBPL3    |
| chr17:2617196-2638320     | 15  | PAFAH1B1  |
| chr6:111363852-111368028  | 11  | REV3L     |
| chr7:5711760-5730817      | 123 | RNF216    |
| chr1:235465635-235496308  | 19  | B3GALNT2  |
| chr19:10168329-10177367   | 41  | DNMT1     |

|                           |      |          |
|---------------------------|------|----------|
| chr1:170016461-170024596  | 13   | KIFAP3   |
| chr3:179706933-179730709  | 16   | USP13    |
| chr15:40645655-40650819   | 13   | CASC5    |
| chr5:131504625-131562047  | 12   | RAPGEF6  |
| chr1:40695174-40695470    | 29   | nogene   |
| chr1:85350414-85367779    | 63   | DDAH1    |
| chr4:25255064-25263849    | 14   | PI4K2B   |
| chr7:44050224-44052941    | 5    | DBNL     |
| chr7:141636959-141649333  | 429  | AGK      |
| chr22:20933778-20934244   | 1314 | CRKL     |
| chr8:100712361-100718280  | 15   | PABPC1   |
| chr17:18865468-18877870   | 31   | PRPSAP2  |
| chr5:173108623-173112379  | 19   | CREBRF   |
| chr2:73946718-73950732    | 11   | DGUOK    |
| chr10:15254720-15284105   | 17   | FAM171A1 |
| chr14:30581075-30593639   | 92   | G2E3     |
| chr5:138557401-138567722  | 43   | HSPA9    |
| chr16:66816580-66823600   | 12   | NAE1     |
| chr13:24490667-24493733   | 33   | PARP4    |
| chr6:169664165-169689308  | 15   | WDR27    |
| chr17:30797310-30804108   | 11   | CRLF3    |
| chr15:65466677-65467223   | 23   | DPP8     |
| chr13:29550203-29554673   | 73   | nogene   |
| chr6:34821652-34834861    | 26   | UHRF1BP1 |
| chr7:139083779-139089759  | 36   | ZC3HAV1  |
| chr16:16086823-16090588   | 41   | ABCC1    |
| chr10:121902390-121924329 | 87   | ATE1     |
| chr6:52464894-52479787    | 3    | EFHC1    |
| chr3:183650295-183665039  | 7    | KLHL24   |
| chr14:71587570-71589370   | 31   | SIPA1L1  |
| chr10:67954594-67966802   | 151  | HERC4    |
| chrX:85046445-85055925    | 17   | APOOL    |
| chr12:121296637-121494665 | 25   | CAMKK2   |
| chr21:46504360-46529183   | 11   | DIP2A    |
| chr2:85027888-85046278    | 16   | KCMF1    |
| chr10:76949141-76970067   | 2    | KCNMA1   |
| chr1:12001400-12002103    | 167  | MFN2     |
| chr8:70121301-70124865    | 14   | NCOA2    |
| chr1:5947103-5961949      | 99   | NPHP4    |
| chr11:74230244-74239256   | 9    | PPME1    |
| chr20:37061102-37065473   | 93   | RBL1     |
| chr6:130288226-130313093  | 63   | SAMD3    |
| chr1:246735974-246740301  | 21   | SCCPDH   |



|                           |     |          |
|---------------------------|-----|----------|
| chr4:82866807-82867316    | 38  | SEC31A   |
| chr6:75647730-75659407    | 48  | SENP6    |
| chr17:31884423-31887313   | 9   | UTP6     |
| chr11:76004004-76016980   | 8   | UVRAG    |
| chr21:42852254-42876767   | 11  | WDR4     |
| chr19:56407025-56414440   | 80  | ZNF583   |
| chr2:28901986-28929710    | 3   | WDR43    |
| chr1:197672036-197715074  | 8   | DENND1B  |
| chr4:176727777-176729746  | 142 | VEGFC    |
| chr11:86250295-86266216   | 12  | EED      |
| chr9:136049635-136050580  | 24  | NACC2    |
| chr16:14644273-14648592   | 14  | BFAR     |
| chr11:128758114-128768272 | 35  | FLI1     |
| chr5:179705678-179707190  | 151 | CANX     |
| chr9:128422867-128424614  | 5   | CERCAM   |
| chr7:6434793-6436533      | 12  | DAGLB    |
| chrX:135545422-135549805  | 51  | DDX26B   |
| chr11:78493062-78571444   | 11  | NARS2    |
| chr4:2938442-2938625      | 25  | nogene   |
| chr6:130311290-130334845  | 71  | nogene   |
| chr16:69119668-69119968   | 3   | nogene   |
| chr4:76124648-76132719    | 4   | NUP54    |
| chr15:43753823-43761531   | 3   | PDIA3    |
| chr11:86000642-86001158   | 15  | PICALM   |
| chr17:5361207-5363016     | 3   | RABEP1   |
| chr21:44052279-44077784   | 4   | TRAPPC10 |
| chr16:84758715-84775225   | 17  | USP10    |
| chr12:24832722-24836596   | 58  | BCAT1    |
| chr15:64965319-64983593   | 3   | SPG21    |
| chr11:33061529-33072653   | 16  | TCP11L1  |
| chr7:127694827-127721400  | 16  | SND1     |
| chr1:173838189-173840973  | 21  | DARS2    |
| chr9:26923177-26935206    | 3   | PLAA     |
| chr20:36578740-36578966   | 80  | TGIF2    |
| chr7:139137846-139148377  | 2   | TTC26    |
| chr9:74984906-75017448    | 4   | CARNMT1  |
| chr12:8039818-8040165     | 16  | FOXJ2    |
| chr9:96465336-96471094    | 7   | HABP4    |
| chr10:12397268-12403369   | 3   | nogene   |
| chr11:17145667-17155629   | 12  | PIK3C2A  |
| chr20:35716739-35721877   | 4   | RBM39    |
| chr4:151132330-151135132  | 28  | SH3D19   |
| chr19:4365481-4366994     | 16  | SH3GL1   |

|                           |     |          |
|---------------------------|-----|----------|
| chr14:29632868-29638904   | 10  | PRKD1    |
| chr5:77048935-77055596    | 17  | AGGF1    |
| chr6:83918004-83924592    | 14  | CYB5R4   |
| chr19:33798670-33807007   | 5   | KCTD15   |
| chr6:157592987-157595824  | 27  | ZDHHC14  |
| chr9:131638634-131650949  | 19  | RAPGEF1  |
| chr18:45939599-45952643   | 18  | EPG5     |
| chrX:68111853-68194498    | 2   | OPHN1    |
| chr4:147857552-147879338  | 16  | ARHGAP10 |
| chr1:224411426-224424654  | 3   | WDR26    |
| chr4:148477372-148544584  | 11  | no gene  |
| chr3:27424036-27452498    | 15  | SLC4A7   |
| chr2:15504144-15539356    | 71  | NBAS     |
| chr1:121280749-121284995  | 3   | SRGAP2C  |
| chr13:24484652-24503777   | 247 | PARP4    |
| chr2:214752446-214781509  | 12  | BARD1    |
| chr1:51405904-51408332    | 47  | EPS15    |
| chr1:77858937-77861322    | 70  | FAM73A   |
| chr17:12107789-12113360   | 3   | MAP2K4   |
| chr20:5958527-5963359     | 60  | MCM8     |
| chr1:169323116-169324500  | 137 | NME7     |
| chr7:101311275-101311725  | 15  | no gene  |
| chr2:159001079-159136298  | 3   | TANC1    |
| chr21:43644288-43656737   | 11  | HSF2BP   |
| chr17:67922839-67924589   | 12  | BPTF     |
| chr5:10223958-10227647    | 13  | FAM173B  |
| chr7:152273704-152315338  | 10  | KMT2C    |
| chr1:246186742-246193963  | 324 | no gene  |
| chr6:18212487-18213781    | 30  | KDM1B    |
| chr10:126970701-127018835 | 14  | DOCK1    |
| chr9:124938576-124940155  | 4   | GOLGA1   |
| chr5:95755395-95763620    | 307 | RHOBTB3  |
| chr22:31095302-31097338   | 24  | SMTN     |
| chr19:45852311-45854507   | 6   | SYMPK    |
| chr6:31647590-31649627    | 13  | BAG6     |
| chr12:50427761-50430570   | 169 | LARP4    |
| chr16:25161101-25170805   | 28  | LCMT1    |
| chr4:183828177-183829990  | 27  | no gene  |
| chr11:108186481-108189330 | 12  | NPAT     |
| chr1:77154448-77169395    | 16  | PIGK     |
| chr20:35724569-35732135   | 15  | RBM39    |
| chr1:168231513-168242987  | 5   | SFT2D2   |
| chr9:71750042-71805209    | 13  | TMEM2    |

|                           |     |           |
|---------------------------|-----|-----------|
| chr5:172230897-172234358  | 11  | UBTD2     |
| chr22:30946340-30958694   | 14  | MORC2     |
| chr6:110638648-110670541  | 3   | CDK19     |
| chr10:72834358-72871580   | 3   | MCU       |
| chr2:231206197-231240041  | 62  | ARMC9     |
| chr15:83041727-83056545   | 23  | BTBD1     |
| chr15:49225204-49319805   | 17  | GALK2     |
| chr5:160010499-160051183  | 17  | TTC1      |
| chr5:37721114-37727045    | 27  | WDR70     |
| chr5:154294815-154298079  | 56  | GALNT10   |
| chr9:111428041-111433372  | 12  | KIAA0368  |
| chr18:1269669-1276077     | 6   | LINC00470 |
| chr4:152872451-152888307  | 21  | ARFIP1    |
| chr1:74710097-74719372    | 18  | CRYZ      |
| chr22:38302860-38303248   | 18  | CSNK1E    |
| chr22:38493709-38498573   | 4   | DDX17     |
| chr5:119240418-119244576  | 18  | DMXL1     |
| chr1:225264196-225290082  | 7   | DNAH14    |
| chr5:72989426-72990864    | 28  | FCHO2     |
| chr3:52690591-52691629    | 23  | GNL3      |
| chr16:48252130-48277479   | 10  | LONP2     |
| chr8:97686667-97713769    | 5   | MTDH      |
| chr17:36503096-36505404   | 4   | MYO19     |
| chr19:45639978-45640475   | 14  | nogene    |
| chr4:9565858-9567271      | 36  | nogene    |
| chr3:16269125-16286448    | 11  | OXNAD1    |
| chr10:103438014-103438808 | 151 | PDCD11    |
| chr3:128795359-128807671  | 220 | RAB7A     |
| chr8:52668020-52676571    | 24  | RB1CC1    |
| chr17:80707840-80710103   | 17  | RPTOR     |
| chr10:70868344-70871986   | 28  | SGPL1     |
| chr15:75400729-75422823   | 14  | SIN3A     |
| chr1:156014960-156018368  | 18  | SSR2      |
| chr17:59737452-59817773   | 34  | VMP1      |
| chr12:30728647-30751133   | 59  | CAPRIN2   |
| chr10:130145210-130160997 | 43  | GLRX3     |
| chr13:29522316-29532982   | 16  | SLC7A1    |
| chr6:43524470-43525214    | 34  | XPO5      |
| chr17:47664158-47668410   | 116 | KPNB1     |
| chr20:2116665-2117415     | 64  | STK35     |
| chr2:196656632-196677361  | 10  | CCDC150   |
| chr13:23858859-23881787   | 26  | MIPEP     |
| chr1:31918969-31919658    | 24  | PTP4A2    |

|                           |     |          |
|---------------------------|-----|----------|
| chr10:68487143-68516843   | 37  | SLC25A16 |
| chr10:103314185-103333952 | 17  | PCGF6    |
| chr2:230358963-230443099  | 41  | SP140L   |
| chr17:41827425-41828952   | 16  | NT5C3B   |
| chr15:100281228-100331054 | 48  | ADAMTS17 |
| chr1:92177810-92180416    | 13  | KIAA1107 |
| chr8:17098457-17120401    | 26  | MICU3    |
| chr12:102205023-102315490 | 7   | nogene   |
| chr1:119986959-120051779  | 13  | NOTCH2   |
| chr12:112446275-112450512 | 2   | PTPN11   |
| chr18:12814202-12831041   | 33  | PTPN2    |
| chr20:49855437-49878063   | 5   | SLC9A8   |
| chr19:19296988-19306076   | 10  | SUGP1    |
| chr8:86368938-86381629    | 39  | WWP1     |
| chr1:33276099-33281811    | 13  | ZNF362   |
| chr6:108928087-108936999  | 2   | ARMC2    |
| chr2:46535812-46537576    | 2   | nogene   |
| chr4:82870324-82881940    | 50  | SEC31A   |
| chr3:194448456-194450276  | 2   | ATP13A3  |
| chr11:17099859-17112666   | 4   | PIK3C2A  |
| chr1:1482544-1520306      | 906 | ATAD3B   |
| chr7:11040671-11111467    | 11  | PHF14    |
| chr17:50982523-50987237   | 25  | SPAG9    |
| chr19:58088687-58090386   | 13  | ZSCAN18  |
| chr7:5989799-5992057      | 2   | PMS2     |
| chr3:125323308-125331238  | 11  | ZNF148   |
| chr7:5287808-5291821      | 11  | SLC29A4  |
| chr19:43732857-43733733   | 3   | SMG9     |
| chr5:14363731-14381252    | 3   | TRIO     |
| chr2:127850589-127853105  | 31  | POLR2D   |
| chr10:87709195-87715843   | 18  | PAPSS2   |
| chr12:123004393-123005548 | 28  | PITPNM2  |
| chr2:10659171-10668723    | 26  | NOL10    |
| chr7:141611194-141621801  | 19  | AGK      |
| chr5:34175444-34182867    | 31  | nogene   |
| chr17:76558373-76558600   | 25  | nogene   |
| chr2:168138087-168140758  | 24  | STK39    |
| chr17:56895342-56899180   | 4   | TRIM25   |
| chr12:12635776-12635974   | 39  | CREBL2   |
| chr5:133091192-133099652  | 14  | HSPA4    |
| chr15:78488646-78497311   | 8   | IREB2    |
| chr9:136908069-136916615  | 5   | TRAF2    |
| chr1:44978314-44981177    | 4   | EIF2B3   |

|                           |     |          |
|---------------------------|-----|----------|
| chr18:21791373-21844253   | 3   | MIB1     |
| chr18:26052623-26087577   | 23  | SS18     |
| chr4:103343091-103453812  | 32  | nogene   |
| chr5:176322272-176324757  | 26  | SIMC1    |
| chr14:52482229-52491005   | 11  | TXNDC16  |
| chr2:65261246-65265175    | 8   | ACTR2    |
| chr7:27748517-27758133    | 3   | TAX1BP1  |
| chr1:206729971-206731919  | 4   | MAPKAPK2 |
| chr10:94441895-94511654   | 21  | TBC1D12  |
| chr17:51263273-51288203   | 7   | UTP18    |
| chr6:136694139-136698682  | 172 | MAP3K5   |
| chr14:30633946-30653588   | 36  | SCFD1    |
| chr3:138263738-138274544  | 12  | ARMC8    |
| chr19:18596621-18597049   | 28  | CRLF1    |
| chrX:134473358-134498684  | 379 | HPRT1    |
| chr12:19473247-19512465   | 3   | AEBP2    |
| chr11:9403289-9410086     | 11  | IPO7     |
| chr21:45116932-45144701   | 10  | nogene   |
| chr16:89418283-89422305   | 268 | ANKRD11  |
| chr11:34122458-34124400   | 16  | NAT10    |
| chr10:101584601-101586156 | 15  | POLL     |
| chr19:39420625-39422288   | 5   | PLEKHG2  |
| chr9:5787060-5787593      | 38  | ERMP1    |
| chr6:53498606-53522527    | 23  | GCLC     |
| chr2:226838072-226914351  | 21  | RHBDD1   |
| chr9:91852320-91887113    | 7   | nogene   |
| chr3:47701277-47729094    | 5   | SMARCC1  |
| chr10:1084402-1105241     | 13  | WDR37    |
| chr17:66062962-66070001   | 4   | CEP112   |
| chr1:51403418-51406108    | 13  | EPS15    |
| chr15:40387158-40392023   | 13  | KNSTRN   |
| chr18:21765771-21782763   | 4   | MIB1     |
| chr3:115334016-115370176  | 5   | nogene   |
| chr13:72893783-72931267   | 15  | PIBF1    |
| chr6:128240034-128322310  | 2   | PTPRK    |
| chr3:136366942-136377752  | 6   | STAG1    |
| chr20:13528432-13559114   | 31  | TASP1    |
| chr7:5312502-5313863      | 29  | TNRC18   |
| chr2:178535731-178548554  | 12  | TTN-AS1  |
| chr1:150091936-150110627  | 11  | VPS45    |
| chr20:3200000-3203416     | 10  | DDRGK1   |
| chr1:51394380-51409696    | 2   | EPS15    |
| chr19:41268222-41294686   | 23  | HNRNPUL1 |

|                           |    |         |
|---------------------------|----|---------|
| chr19:19915279-19933302   | 12 | ZNF93   |
| chr10:7796120-7802854     | 25 | ATP5C1  |
| chrX:16667513-16702941    | 2  | CTPS2   |
| chr6:5431040-5433056      | 4  | FARS2   |
| chr16:13060267-13063698   | 17 | nogene  |
| chr8:96680442-96682076    | 29 | nogene  |
| chr12:122727738-122728748 | 14 | nogene  |
| chr3:16269125-16271722    | 19 | OXNAD1  |
| chr12:49489464-49490731   | 18 | SPATS2  |
| chr9:83669184-83686155    | 18 | UBQLN1  |
| chr20:32366364-32369123   | 4  | ASXL1   |
| chr2:29133654-29167540    | 2  | CLIP4   |
| chr11:34076235-34076642   | 9  | CAPRIN1 |
| chr20:48969146-48976199   | 7  | ARFGEF2 |
| chr7:6594434-6602140      | 12 | C7orf26 |
| chr22:41135812-41146816   | 3  | EP300   |
| chr5:180330699-180338600  | 5  | GFPT2   |
| chr7:25154019-25156368    | 3  | nogene  |
| chr17:1658252-1658763     | 5  | PRPF8   |
| chr7:22219865-22267012    | 14 | RAPGEF5 |
| chr2:110672660-110674365  | 10 | BUB1    |
| chr20:38941958-38948000   | 41 | FAM83D  |
| chr15:68175636-68176654   | 27 | PIAS1   |
| chr11:125572457-125575408 | 14 | EI24    |
| chr8:73582769-73688813    | 4  | STAU2   |
| chr17:47137151-47138891   | 11 | CDC27   |
| chr7:157223253-157231327  | 15 | UBE3C   |
| chrX:46625262-46625978    | 20 | nogene  |
| chr2:86121478-86127991    | 67 | PTCD3   |
| chr6:136601021-136622981  | 11 | MAP3K5  |
| chr16:58599235-58599511   | 30 | CNOT1   |
| chr1:236168705-236205250  | 7  | GPR137B |
| chr20:32791600-32792770   | 27 | DNMT3B  |
| chr3:196242121-196242561  | 30 | PCYT1A  |
| chr16:48252130-48252365   | 18 | LONP2   |
| chr7:99333324-99354121    | 6  | ARPC1A  |
| chr14:72945883-72947415   | 4  | DCAF4   |
| chr6:149738642-149742570  | 52 | NUP43   |
| chr7:99386684-99388261    | 38 | ARPC1B  |
| chr6:16585779-16657901    | 10 | ATXN1   |
| chr10:28119650-28131691   | 3  | MPP7    |
| chr13:20058574-20067390   | 4  | ZMYM2   |
| chr15:65480221-65481615   | 25 | DPP8    |

|                          |     |              |
|--------------------------|-----|--------------|
| chrX:27301038-27317930   | 2   | nogene       |
| chr3:52930328-52932308   | 35  | SFMBT1       |
| chr18:42027442-42049605  | 104 | PIK3C3       |
| chr11:18000496-18008076  | 10  | SERGEF       |
| chr5:138386021-138400012 | 20  | KDM3B        |
| chr9:36594627-36633200   | 17  | MELK         |
| chr12:6520985-6522037    | 6   | NCAPD2       |
| chr7:4049347-4079584     | 12  | SDK1         |
| chr1:99999260-100017815  | 12  | SLC35A3      |
| chr19:12710620-12711613  | 37  | TNPO2        |
| chrX:16693140-16702941   | 18  | CTPS2        |
| chr8:108234997-108241913 | 93  | EIF3E        |
| chr1:16305802-16316727   | 2   | FBXO42       |
| chr1:224304735-224305166 | 17  | NVL          |
| chr3:149872028-149912083 | 2   | RNF13        |
| chr18:32111753-32129327  | 17  | RNF138       |
| chr11:62585093-62585593  | 33  | nogene       |
| chr12:48088800-48098124  | 54  | SENP1        |
| chr1:25351625-25356853   | 11  | TMEM50A      |
| chr1:151161735-151162100 | 23  | LYSMD1       |
| chr20:56382984-56388202  | 10  | AURKA        |
| chr15:49235850-49319805  | 11  | GALK2        |
| chr4:4240320-4246343     | 7   | TMEM128      |
| chr3:53290790-53292827   | 13  | DCP1A        |
| chr4:124457180-124556510 | 4   | LOC101927087 |
| chr1:155904310-155904804 | 99  | RIT1         |
| chr1:150230570-150231926 | 118 | ANP32E       |
| chr17:56814868-56825321  | 2   | C17orf67     |
| chr2:61203139-61214694   | 15  | USP34        |
| chr5:94909250-94924021   | 29  | MCTP1        |
| chrX:110020351-110067396 | 6   | TMEM164      |
| chr2:37139630-37141701   | 4   | EIF2AK2      |
| chr6:57124733-57128840   | 36  | ZNF451       |
| chr14:75030542-75046589  | 10  | MLH3         |
| chr2:170817048-170818510 | 12  | GAD1         |
| chr1:168235100-168243069 | 18  | SFT2D2       |
| chr1:155867964-155868791 | 3   | SYT11        |
| chrX:115946385-115951383 | 16  | DANT2        |
| chr8:97699753-97723035   | 14  | MTDH         |
| chr2:172562219-172565073 | 18  | PDK1         |
| chr2:70179531-70181997   | 112 | C2orf42      |
| chr9:129120512-129123138 | 7   | PPP2R4       |
| chrX:68063853-68113239   | 3   | OPHN1        |

|                           |     |          |
|---------------------------|-----|----------|
| chr14:77462159-77465667   | 2   | AHSA1    |
| chr7:99333324-99348959    | 17  | ARPC1A   |
| chr21:36247516-36260732   | 15  | DOPEY2   |
| chr16:30666990-30667296   | 2   | FBRS     |
| chr10:32037253-32037607   | 18  | KIF5B    |
| chr13:75800683-75823873   | 2   | LMO7     |
| chr2:31917925-31950717    | 2   | MEMO1    |
| chr1:172797452-172933643  | 34  | nogene   |
| chr5:115221823-115253255  | 5   | PGGT1B   |
| chrX:24821451-24855481    | 6   | POLA1    |
| chr9:109057190-109060452  | 5   | TMEM245  |
| chr6:107946434-107946810  | 11  | nogene   |
| chrX:85873051-85894284    | 9   | CHM      |
| chr10:1008957-1012662     | 14  | GTPBP4   |
| chr17:64171099-64188415   | 144 | TEX2     |
| chr10:31461036-31514708   | 15  | ZEB1     |
| chr1:153760310-153765063  | 11  | INTS3    |
| chr7:11061790-11062085    | 46  | PHF14    |
| chr3:185598411-185613408  | 65  | SENP2    |
| chr18:49272177-49379758   | 16  | DYM      |
| chr12:51053777-51056502   | 15  | LETMD1   |
| chr17:81596115-81608822   | 26  | NPLOC4   |
| chr14:102870184-102903429 | 24  | TRAF3    |
| chr19:11495949-11498339   | 15  | ZNF653   |
| chr9:20881870-20885230    | 11  | FOCAD    |
| chr3:121509560-121544906  | 11  | POLQ     |
| chr15:100983527-100989398 | 5   | LRRK1    |
| chr1:151224244-151232703  | 5   | PIP5K1A  |
| chr3:12301520-12312453    | 9   | PPARG    |
| chr2:113916883-113942359  | 65  | ACTR3    |
| chr11:86000642-86031611   | 29  | PICALM   |
| chr12:13211468-13214673   | 14  | EMP1     |
| chr22:46997633-47037198   | 9   | TBC1D22A |
| chr6:158605266-158608750  | 91  | TMEM181  |
| chr11:9998265-10002689    | 17  | SBF2     |
| chr1:244418759-244424387  | 5   | ADSS     |
| chr10:103049706-103076270 | 2   | CNNM2    |
| chrX:71397252-71398737    | 21  | TAF1     |
| chr10:100536410-100546581 | 3   | HIF1AN   |
| chr1:193203794-193236356  | 23  | CDC73    |
| chr22:33761370-33761558   | 36  | LARGE    |
| chr6:30627459-30640422    | 2   | ATAT1    |
| chr1:156333546-156334918  | 161 | CCT3     |



|                          |     |           |
|--------------------------|-----|-----------|
| chr13:21045684-21046230  | 64  | LATS2     |
| chr1:39385433-39388658   | 6   | MACF1     |
| chr16:69083484-69085542  | 9   | TANGO6    |
| chr13:60444682-60467379  | 19  | TDRD3     |
| chr1:32091674-32100562   | 4   | TMEM39B   |
| chr2:78199604-78203818   | 36  | nogene    |
| chr7:149450998-149456037 | 13  | ZNF777    |
| chr7:143383155-143383322 | 5   | ZYX       |
| chr1:51750144-51765981   | 6   | OSBPL9    |
| chr16:1586129-1588024    | 3   | IFT140    |
| chr3:132639491-132644896 | 16  | ACAD11    |
| chr2:218245419-218249921 | 6   | ARPC2     |
| chr2:9356046-9358889     | 38  | ASAP2     |
| chr15:92996956-92998621  | 15  | CHD2      |
| chr2:29152684-29167540   | 3   | CLIP4     |
| chr1:245002120-245022296 | 24  | EFCAB2    |
| chr1:50567076-50584811   | 12  | FAF1      |
| chr7:35638349-35673278   | 16  | HERPUD2   |
| chr5:176352621-176355749 | 12  | KIAA1191  |
| chr11:68032151-68033283  | 18  | NDUFS8    |
| chr2:10788696-10789889   | 50  | PDIA6     |
| chr2:55667861-55673079   | 13  | PNPT1     |
| chr14:50150007-50153173  | 13  | SOS2      |
| chr18:31890734-31909760  | 32  | TRAPPC8   |
| chr3:183797922-183798989 | 8   | YEATS2    |
| chr1:155725381-155729366 | 7   | DAP3      |
| chr6:3076763-3077935     | 273 | RIPK1     |
| chr2:236036560-236049281 | 42  | AGAP1     |
| chr11:93724253-93725831  | 39  | CEP295    |
| chr16:48553538-48562444  | 43  | N4BP1     |
| chr16:27703895-27708920  | 7   | KIAA0556  |
| chr1:149660853-149669310 | 6   | LINC00869 |
| chr15:25019026-25022964  | 6   | nogene    |
| chr5:614469-655584       | 26  | nogene    |
| chr8:140789473-140864399 | 82  | PTK2      |
| chr6:145888019-145894977 | 144 | SHPRH     |
| chr9:96351102-96360221   | 6   | SLC35D2   |
| chr5:160010499-160010858 | 16  | TTC1      |
| chr3:184924861-184930568 | 7   | VPS8      |
| chr4:39224883-39228690   | 6   | WDR19     |
| chr14:35122951-35127611  | 4   | KIAA0391  |
| chr10:91996368-92008275  | 105 | BTAFL1    |
| chr2:85368685-85371562   | 81  | ELMOD3    |

|                           |     |           |
|---------------------------|-----|-----------|
| chr5:179888102-179894614  | 14  | TBC1D9B   |
| chr8:98526741-98529652    | 110 | STK3      |
| chr20:34290331-34295585   | 14  | AHCY      |
| chr5:112766325-112801383  | 15  | APC       |
| chr7:122436359-122451475  | 1   | CADPS2    |
| chr16:67066681-67082308   | 34  | CBFB      |
| chr1:240253750-240258032  | 1   | FMN2      |
| chr15:78160091-78162367   | 10  | IDH3A     |
| chr15:44615362-44620403   | 45  | SPG11     |
| chr18:62348167-62360049   | 15  | TNFRSF11A |
| chr7:67067284-67072389    | 36  | TYW1      |
| chr8:98706466-98722818    | 20  | STK3      |
| chr20:37765196-37768044   | 62  | CTNBL1    |
| chr22:25663629-25674528   | 45  | ADRBK2    |
| chr8:125003175-125011632  | 9   | SQLE      |
| chr19:52728729-52730005   | 37  | ZNF611    |
| chr19:13955911-13956522   | 35  | DCAF15    |
| chr19:18938352-18939049   | 33  | HOMER3    |
| chr17:56901418-56904488   | 70  | TRIM25    |
| chr6:151361485-151363195  | 2   | nogene    |
| chr4:25188077-25188463    | 2   | nogene    |
| chr8:30786210-30799755    | 41  | PPP2CB    |
| chr11:74775145-74810330   | 16  | RNF169    |
| chr2:31883385-31932135    | 105 | MEMO1     |
| chr4:88061905-88068061    | 9   | PKD2      |
| chr3:47661293-47678311    | 95  | SMARCC1   |
| chr17:76902554-76906187   | 18  | MGAT5B    |
| chr6:167022408-167024894  | 27  | FGFR1OP   |
| chr9:540507-594080        | 1   | KANK1     |
| chr1:44753732-44762658    | 11  | KIF2C     |
| chr8:60533307-60533558    | 1   | nogene    |
| chr15:85097947-85117839   | 14  | PDE8A     |
| chr15:43146492-43169677   | 10  | TMEM62    |
| chr1:12362719-12416827    | 1   | VPS13D    |
| chr12:14423908-14425473   | 18  | ATF7IP    |
| chr11:122712171-122714877 | 15  | nogene    |
| chr1:77641383-77641655    | 31  | ZZZ3      |
| chr22:38299894-38300952   | 14  | CSNK1E    |
| chr6:128322038-128397688  | 14  | PTPRK     |
| chr1:179986168-180003287  | 13  | CEP350    |
| chr6:31741162-31744581    | 21  | MSH5      |
| chr19:3192469-3198897     | 40  | NCLN      |
| chr5:177135086-177204292  | 15  | NSD1      |

|                           |     |           |
|---------------------------|-----|-----------|
| chr3:183833491-183844326  | 13  | PARL      |
| chr17:60269449-60271481   | 63  | USP32     |
| chr1:243545509-243615161  | 3   | AKT3      |
| chr4:147906637-147955374  | 16  | ARHGAP10  |
| chr4:147808065-147822957  | 3   | ARHGAP10  |
| chr19:15268904-15273133   | 12  | BRD4      |
| chr17:44154552-44155411   | 11  | C17orf53  |
| chr22:28694031-28719485   | 13  | CHEK2     |
| chr11:68061952-68081457   | 2   | CHKA      |
| chrX:134473358-134514051  | 11  | HPRT1     |
| chr20:5958527-5973196     | 24  | MCM8      |
| chr17:31155982-31169997   | 285 | NF1       |
| chr16:69695135-69695379   | 284 | NFAT5     |
| chr9:22270998-22301707    | 2   | nogene    |
| chr3:52122378-52125181    | 7   | POC1A     |
| chr8:100274952-100288267  | 16  | RNF19A    |
| chr1:165896189-165905969  | 18  | UCK2      |
| chr14:64490360-64495559   | 2   | ZBTB25    |
| chr17:49796749-49798558   | 14  | KAT7      |
| chr7:65726770-65734350    | 7   | LOC441242 |
| chr15:40183713-40185642   | 47  | BUB1B     |
| chr1:193212064-193236356  | 11  | CDC73     |
| chr12:131838194-131845449 | 12  | MMP17     |
| chr7:72881449-72891110    | 8   | POM121    |
| chr6:43533906-43551453    | 41  | XPO5      |
| chr11:74921213-74937068   | 1   | XRRA1     |
| chr17:19920035-19936430   | 12  | AKAP10    |
| chr2:9279316-9327911      | 29  | ASAP2     |
| chr17:82171700-82178605   | 3   | CCDC57    |
| chr10:382646-390863       | 29  | DIP2C     |
| chr5:13914519-13931244    | 15  | DNAH5     |
| chr12:101908185-101914232 | 19  | DRAM1     |
| chr10:863742-864270       | 157 | LARP4B    |
| chr5:180248972-180280608  | 55  | MAPK9     |
| chr12:112068879-112081134 | 3   | NAA25     |
| chr13:24474531-24478276   | 24  | PARP4     |
| chr6:143765260-143777383  | 24  | PHACTR2   |
| chr18:42015475-42029441   | 24  | PIK3C3    |
| chr1:229286485-229313760  | 16  | RAB4A     |
| chr13:37040404-37051583   | 84  | SUPT20H   |
| chr22:42826939-42835493   | 29  | ARFGAP3   |
| chr11:61806663-61811075   | 14  | FADS1     |
| chr7:102878330-102884312  | 17  | FBXL13    |

|                           |     |              |
|---------------------------|-----|--------------|
| chr7:66554584-66576932    | 94  | GS1-124K5.11 |
| chr6:57919783-57930291    | 17  | GUSBP4       |
| chr16:67939885-67940478   | 59  | LCAT         |
| chr4:150806270-150831976  | 6   | LRBA         |
| chr13:32521372-32527532   | 29  | N4BP2L2      |
| chr17:1045081-1045650     | 16  | nogene       |
| chr15:40698756-40706294   | 14  | RAD51        |
| chr17:319419-327579       | 38  | RPH3AL       |
| chr1:213104453-213129889  | 3   | RPS6KC1      |
| chr3:47037665-47067118    | 127 | SETD2        |
| chr7:17821508-17845694    | 10  | SNX13        |
| chr15:71660529-71660734   | 5   | THSD4        |
| chr4:147633764-147634581  | 3   | TMEM184C     |
| chr17:4282797-4296809     | 20  | UBE2G1       |
| chr18:9593767-9595102     | 40  | PPP4R1       |
| chr1:43824730-43838311    | 15  | ST3GAL3      |
| chr3:142748257-142781029  | 5   | TRPC1        |
| chr11:47750915-47751290   | 30  | FNBP4        |
| chr17:39202316-39203109   | 13  | RPL19        |
| chr7:141601204-141633980  | 12  | AGK          |
| chr10:110124016-110130486 | 26  | ADD3         |
| chr3:15685225-15686309    | 6   | ANKRD28      |
| chr14:32117142-32152528   | 17  | ARHGAP5      |
| chr8:102834188-102838916  | 16  | AZIN1        |
| chr1:111147641-111161296  | 4   | CEPT1        |
| chr12:108657303-108701323 | 43  | CORO1C       |
| chr11:107326923-107336713 | 13  | CWF19L2      |
| chr7:32716717-32726470    | 2   | DPY19L1P1    |
| chr5:179617988-179618323  | 12  | HNRNPH1      |
| chr5:79439009-79447145    | 10  | HOMER1       |
| chr5:62550366-62591672    | 20  | IPO11        |
| chr15:79456097-79458445   | 20  | KIAA1024     |
| chr5:36211843-36227565    | 96  | NADK2        |
| chr9:130222649-130226504  | 25  | NCS1         |
| chr3:170293382-170297393  | 11  | PRKCI        |
| chr3:170293382-170299110  | 27  | PRKCI        |
| chr2:37289355-37290999    | 19  | PRKD3        |
| chr12:112502143-112504796 | 13  | PTPN11       |
| chr20:37056145-37065473   | 51  | RBL1         |
| chrX:136872267-136875585  | 11  | RBMX         |
| chr9:122879754-122883379  | 10  | RC3H2        |
| chr8:42459895-42472654    | 54  | SLC20A2      |
| chr15:58913498-58916999   | 6   | SLTM         |

|                           |     |         |
|---------------------------|-----|---------|
| chr16:23079945-23082557   | 34  | USP31   |
| chr2:9845219-9854421      | 23  | TAF1B   |
| chr17:1534098-1538952     | 5   | PITPNA  |
| chr7:5740972-5741815      | 20  | RNF216  |
| chr10:121790168-121924329 | 21  | ATE1    |
| chr2:32478634-32482582    | 35  | BIRC6   |
| chr2:174915057-174944943  | 15  | CHN1    |
| chr6:53078798-53082618    | 3   | FBXO9   |
| chrX:19425530-19464406    | 15  | MAP3K15 |
| chr2:134253094-134270550  | 41  | MGAT5   |
| chr21:34125340-34142707   | 6   | MRPS6   |
| chr8:70170201-70174859    | 3   | NCOA2   |
| chr9:91852320-91886770    | 40  | nogene  |
| chr7:72890626-72891110    | 210 | POM121  |
| chr13:29517572-29536202   | 5   | SLC7A1  |
| chr4:122935713-123028395  | 3   | SPATA5  |
| chr12:49489464-49500205   | 4   | SPATS2  |
| chr7:157163809-157187021  | 25  | UBE3C   |
| chr1:165890203-165903279  | 2   | UCK2    |
| chr2:85027888-85035155    | 19  | KCMF1   |
| chr10:73474918-73479517   | 28  | PPP3CB  |
| chr1:28613246-28622165    | 50  | TAF12   |
| chr6:159736257-159748369  | 14  | WTAP    |
| chr4:185258847-185267155  | 56  | SNX25   |
| chr7:111487237-111492514  | 6   | IMMP2L  |
| chr5:168488601-168497348  | 286 | RARS    |
| chr5:171183321-171221840  | 14  | RANBP17 |
| chr19:12145257-12146224   | 41  | ZNF625  |
| chr17:63760913-63764847   | 12  | CCDC47  |
| chr2:218217462-218249921  | 12  | ARPC2   |
| chr4:89020459-89029649    | 20  | FAM13A  |
| chr16:46909683-46909927   | 13  | GPT2    |
| chr19:45258988-45271708   | 15  | MARK4   |
| chr7:158759485-158799072  | 110 | ESYT2   |
| chr14:69203916-69210201   | 25  | EXD2    |
| chr9:127517825-127531778  | 3   | FAM129B |
| chr7:5603495-5604030      | 21  | FSCN1   |
| chr15:67600684-67646469   | 17  | MAP2K5  |
| chr1:176043185-176136547  | 24  | RFWD2   |
| chr2:190510360-190519022  | 2   | NEMP2   |
| chr8:140735250-140752316  | 182 | PTK2    |
| chr20:35655156-35659014   | 14  | RBM12   |
| chr11:72887469-72889945   | 89  | FCHSD2  |

|                          |      |          |
|--------------------------|------|----------|
| chr1:113738109-113758733 | 6    | PHTF1    |
| chr4:122927633-122938249 | 7    | SPATA5   |
| chr9:122285168-122286166 | 40   | MRRF     |
| chr19:49135778-49136122  | 11   | PPFIA3   |
| chr16:53498390-53500329  | 47   | AKTIP    |
| chr1:93567278-93576129   | 8    | BCAR3    |
| chr11:68799217-68812576  | 12   | CPT1A    |
| chr3:197104902-197142768 | 12   | DLG1     |
| chr5:119097978-119105258 | 23   | DMXL1    |
| chrX:130665642-130679748 | 2    | ENOX2    |
| chr2:58198593-58232112   | 576  | FANCL    |
| chr6:5431040-5445504     | 25   | FARS2    |
| chr18:32379211-32393035  | 13   | GAREM    |
| chr1:1804418-1806538     | 77   | GNB1     |
| chr7:139715931-139755259 | 3    | HIPK2    |
| chr2:27485017-27485503   | 19   | IFT172   |
| chr8:97805352-97819238   | 23   | LAPTM4B  |
| chr19:11123173-11131795  | 4    | LDLR     |
| chr3:197858833-197875775 | 18   | LRCH3    |
| chr8:95031994-95052230   | 4    | NDUFAF6  |
| chr10:15128349-15135418  | 15   | NMT2     |
| chr7:75385082-75395503   | 5    | nogene   |
| chr11:17863565-18010139  | 27   | nogene   |
| chr19:36678044-36680479  | 5    | nogene   |
| chr7:83134249-83135656   | 16   | PCLO     |
| chr1:233014664-233057290 | 5    | PCNXL2   |
| chr3:121449314-121487509 | 59   | POLQ     |
| chr8:38266140-38267960   | 4    | PPAPDC1B |
| chr3:48756378-48807684   | 13   | PRKAR2A  |
| chr5:98779579-98780088   | 33   | RGMB     |
| chr2:151441904-151443709 | 10   | RIF1     |
| chr16:18782780-18789118  | 5    | RPS15A   |
| chr22:42574679-42577962  | 33   | RRP7BP   |
| chr1:161323613-161340655 | 17   | SDHC     |
| chr10:50433475-50466932  | 108  | SGMS1    |
| chr19:38106536-38119882  | 30   | SIPA1L3  |
| chr19:46782382-46784559  | 17   | SLC1A5   |
| chr15:64974601-64976555  | 4    | SPG21    |
| chr14:77512156-77518167  | 6    | SPTLC2   |
| chr1:29154695-29154910   | 1212 | SRSF4    |
| chr1:95138274-95151419   | 6    | TMEM56   |
| chr16:375132-376812      | 15   | TMEM8A   |
| chr15:42829937-42840433  | 19   | TTBK2    |

|                           |    |           |
|---------------------------|----|-----------|
| chr6:30032988-30035983    | 14 | ZNRD1-AS1 |
| chrX:155506897-155514265  | 11 | TMLHE     |
| chr7:129671428-129727365  | 7  | NRF1      |
| chr7:140334678-140337349  | 5  | SLC37A3   |
| chr20:47246007-47246517   | 4  | ZMYND8    |
| chr17:43201685-43203786   | 2  | NBR1      |
| chr10:16695022-16734064   | 6  | RSU1      |
| chr16:2323522-2329854     | 10 | ABCA3     |
| chr4:51860542-51891851    | 33 | DCUN1D4   |
| chr3:184317320-184317816  | 6  | EIF4G1    |
| chr5:66021321-66028343    | 19 | ERBB2IP   |
| chr10:94507266-94522453   | 25 | TBC1D12   |
| chr14:39313339-39348977   | 13 | CTAGE5    |
| chr3:155906159-155916192  | 11 | GMPS      |
| chr1:247443971-247444821  | 26 | NLRP3     |
| chr14:103778744-103807869 | 13 | PPP1R13B  |
| chr15:72518066-72544964   | 53 | ARIH1     |
| chr5:111374849-111394782  | 48 | CAMK4     |
| chr16:53810139-53888951   | 12 | FTO       |
| chr6:167870385-167891029  | 3  | MLLT4     |
| chr8:73955910-73959818    | 50 | TCEB1     |
| chr15:42983896-42990120   | 4  | UBR1      |
| chr6:169632946-169643786  | 10 | WDR27     |
| chr2:113927344-113934386  | 11 | ACTR3     |
| chr3:43549719-43561402    | 12 | ANO10     |
| chr5:73892051-73901284    | 3  | ARHGEF28  |
| chr12:121268637-121270945 | 4  | CAMKK2    |
| chr17:46050532-46094701   | 53 | KANSL1    |
| chr12:4657747-4685325     | 25 | NDUFA9    |
| chr1:44859580-44859866    | 23 | nogene    |
| chr17:75208526-75218306   | 12 | NUP85     |
| chr12:79820773-79822190   | 8  | PPP1R12A  |
| chr8:94404076-94411315    | 3  | RAD54B    |
| chr19:13993524-13993895   | 13 | RFX1      |
| chr6:33435151-33435613    | 3  | SYNGAP1   |
| chr22:43059383-43064324   | 5  | TTLL1     |
| chr19:36092688-36094164   | 5  | WDR62     |
| chr12:15665755-15681302   | 7  | EPS8      |
| chr5:5441111-5444326      | 24 | ICE1      |
| chr19:40616888-40617225   | 25 | LTBP4     |
| chr1:11121245-11122126    | 30 | MTOR      |
| chr5:131395562-131408207  | 39 | nogene    |
| chr7:44014605-44016523    | 20 | POLR2J4   |

|                           |     |           |
|---------------------------|-----|-----------|
| chr8:142330900-142354763  | 3   | TSNARE1   |
| chr11:110136662-110137414 | 212 | ZC3H12C   |
| chr1:43588730-43589000    | 2   | PTPRF     |
| chr7:92569822-92581603    | 16  | FAM133B   |
| chr2:144317478-144320702  | 3   | nogene    |
| chr17:68306942-68401450   | 5   | ARSG      |
| chr7:2256873-2278305      | 4   | SNX8      |
| chr1:32631826-32634072    | 14  | ZBTB8OS   |
| chr5:126561082-126577211  | 9   | ALDH7A1   |
| chr3:71015548-71053773    | 23  | FOXP1     |
| chr2:43973606-43982434    | 132 | LRPPRC    |
| chrX:65075605-65113813    | 35  | nogene    |
| chr11:17878207-18008076   | 53  | SERGEF    |
| chr1:108154982-108185954  | 26  | SLC25A24  |
| chr6:30061514-30062333    | 11  | ZNRD1     |
| chr3:33412721-33425741    | 34  | UBP1      |
| chr11:46808030-46821268   | 70  | CKAP5     |
| chr8:129871374-129904585  | 70  | FAM49B    |
| chr4:108594669-108598695  | 6   | nogene    |
| chr1:224250211-224268133  | 67  | NVL       |
| chr4:109462900-109473186  | 4   | SEC24B    |
| chr7:93334116-93341575    | 23  | VPS50     |
| chr12:111525191-111552977 | 34  | ATXN2     |
| chr5:55327715-55341771    | 12  | SKIV2L2   |
| chr6:149771161-149796500  | 28  | PCMT1     |
| chr20:17947485-17957037   | 459 | SNX5      |
| chr1:243563719-243695716  | 20  | AKT3      |
| chr1:35745450-35746992    | 26  | CLSPN     |
| chr8:141150833-141151837  | 3   | DENND3    |
| chr16:48258617-48277479   | 27  | LONP2     |
| chr13:23874845-23886506   | 33  | MIPEP     |
| chr11:75404060-75404843   | 12  | nogene    |
| chr10:92893348-92899644   | 447 | EXOC6     |
| chr11:76959076-76998821   | 32  | ACER3     |
| chr8:39221609-39257343    | 10  | ADAM32    |
| chr1:26239761-26244318    | 56  | CEP85     |
| chr15:40009613-40019200   | 42  | EIF2AK4   |
| chr6:98880552-98934879    | 12  | FBXL4     |
| chr8:42354424-42371662    | 57  | nogene    |
| chr14:22906194-22909595   | 12  | RBM23     |
| chr7:66286510-66356871    | 40  | TPST1     |
| chr3:41705056-41717861    | 28  | ULK4      |
| chr7:86925527-86945046    | 8   | KIAA1324L |



|                          |     |                 |
|--------------------------|-----|-----------------|
| chr2:241157806-241169867 | 4   | PPP1R7          |
| chr8:22474953-22475624   | 145 | PPP3CC          |
| chr19:5039835-5047669    | 76  | KDM4B           |
| chr2:240523884-240555055 | 12  | ANKMY1          |
| chr15:40386361-40389929  | 5   | KNSTRN          |
| chr16:71676446-71679535  | 54  | PHLPP2          |
| chr16:24927683-24939597  | 26  | ARHGAP17        |
| chr16:16052723-16056295  | 39  | ABCC1           |
| chr5:140438460-140449305 | 40  | ANKHD1-EIF4EBP3 |
| chr15:83030135-83056545  | 12  | BTBD1           |
| chr11:34090178-34092056  | 46  | CAPRIN1         |
| chr2:72134760-72135419   | 14  | CYP26B1         |
| chr10:21904521-21929141  | 106 | DNAJC1          |
| chr7:65974294-65976202   | 100 | GUSB            |
| chr1:201854594-201857194 | 14  | IPO9            |
| chr20:34442207-34462221  | 7   | ITCH            |
| chr18:2937691-2938037    | 5   | LPIN2           |
| chr2:43963587-43982434   | 14  | LRPPRC          |
| chr6:36052698-36059347   | 56  | MAPK14          |
| chr12:87648520-87715112  | 11  | nogene          |
| chr12:6556949-6557642    | 12  | NOP2            |
| chr17:7499038-7499491    | 603 | POLR2A          |
| chr2:28752037-28799433   | 58  | PPP1CB          |
| chr5:170918712-171028989 | 13  | RANBP17         |
| chr22:35759887-35810004  | 13  | RBFOX2          |
| chr2:226837547-226914351 | 17  | RHBDD1          |
| chr6:107912715-107924932 | 43  | SEC63           |
| chr11:57491223-57491862  | 28  | SLC43A1         |
| chr4:67663138-67665292   | 5   | UBA6            |
| chr15:61990999-61991802  | 42  | VPS13C          |
| chr6:169602218-169652008 | 19  | WDR27           |
| chr19:36823730-36827849  | 8   | ZNF790-AS1      |
| chr10:68737844-68742569  | 287 | CCAR1           |
| chr6:143844485-143846224 | 12  | LTV1            |
| chr4:39837855-39849652   | 12  | PDS5A           |
| chr1:54865302-54876047   | 16  | DHCR24          |
| chr17:18865468-18872649  | 18  | PRPSAP2         |
| chr1:180984676-180993425 | 801 | STX6            |
| chr1:93154655-93160226   | 12  | TMED5           |
| chr2:232014834-232024330 | 29  | DIS3L2          |
| chr2:135943377-135961498 | 3   | DARS            |
| chr7:104136780-104165282 | 45  | ORC5            |
| chr5:111669418-111669635 | 6   | STARD4-AS1      |

|                           |      |          |
|---------------------------|------|----------|
| chr18:21564202-21568094   | 57   | ESCO1    |
| chr5:109767534-109789527  | 28   | MAN2A1   |
| chr7:135622776-135630470  | 6    | NUP205   |
| chr19:45022052-45028992   | 56   | RELB     |
| chr17:80922723-80940601   | 16   | RPTOR    |
| chr8:97713661-97719189    | 23   | MTDH     |
| chrX:1593443-1595532      | 25   | AKAP17A  |
| chr15:72518066-72561549   | 100  | ARIH1    |
| chr21:39276172-39278813   | 12   | BRWD1    |
| chr3:197115926-197149796  | 5    | DLG1     |
| chr5:131677702-131709272  | 107  | FNIP1    |
| chr12:132813306-132822311 | 4    | GOLGA3   |
| chr14:50446078-50482416   | 15   | MAP4K5   |
| chr17:62029540-62033984   | 2    | MED13    |
| chr7:131375423-131388972  | 21   | MKLN1    |
| chr17:2665371-2670331     | 13   | PAFAH1B1 |
| chr2:108751263-108751994  | 2    | RANBP2   |
| chr12:116749840-116779348 | 21   | RNFT2    |
| chr1:234418083-234427766  | 10   | TARBP1   |
| chr17:15677175-15683157   | 6    | TRIM16   |
| chr6:144793833-144821018  | 11   | UTRN     |
| chr17:1050049-1102027     | 17   | ABR      |
| chr6:52500285-52500764    | 3    | nogene   |
| chr8:119806282-119831721  | 6    | TAF2     |
| chr3:105734008-105751618  | 10   | CBLB     |
| chr4:105424195-105449403  | 38   | PPA2     |
| chr12:110382842-110388623 | 15   | ANAPC7   |
| chr3:136604308-136630981  | 7    | STAG1    |
| chr8:42355515-42361365    | 13   | POLB     |
| chr5:65451474-65473952    | 1309 | ADAMTS6  |
| chr16:75620265-75620820   | 18   | ADAT1    |
| chr1:35966954-35973511    | 108  | AGO3     |
| chr3:141903619-141916020  | 29   | ATP1B3   |
| chr12:56642457-56643958   | 17   | ATP5B    |
| chr8:53811163-53817530    | 19   | ATP6V1H  |
| chr16:297055-298251       | 20   | AXIN1    |
| chr1:235450239-235494828  | 7    | B3GALNT2 |
| chr2:32439507-32443588    | 15   | BIRC6    |
| chr19:55294016-55294397   | 17   | BRSK1    |
| chr9:26842274-26887513    | 17   | CAAP1    |
| chr7:122379367-122393582  | 6    | CADPS2   |
| chr18:68823365-68874785   | 17   | CCDC102B |
| chr3:56563683-56571302    | 25   | CCDC66   |

|                           |     |           |
|---------------------------|-----|-----------|
| chr3:48167845-48177988    | 61  | CDC25A    |
| chr3:48174283-48177988    | 49  | CDC25A    |
| chr1:227030407-227035607  | 6   | CDC42BPA  |
| chr2:121448952-121457757  | 15  | CLASP1    |
| chr2:29121373-29174445    | 2   | CLIP4     |
| chr3:32733422-32734976    | 57  | CNOT10    |
| chr2:62000700-62000982    | 112 | COMMD1    |
| chr1:160311867-160313167  | 12  | COPA      |
| chr2:36396613-36396787    | 58  | CRIM1     |
| chr20:49058452-49063344   | 13  | CSE1L     |
| chr9:123609435-123879021  | 5   | DENND1A   |
| chr20:62905886-62914406   | 45  | DIDO1     |
| chr10:72343365-72345127   | 4   | DNAJB12   |
| chrX:24062415-24071727    | 13  | EIF2S3    |
| chr1:51461090-51465326    | 56  | EPS15     |
| chr8:28713456-28718207    | 42  | EXTL3     |
| chr17:42706006-42708083   | 19  | EZH1      |
| chr10:124806830-124831463 | 19  | FAM175B   |
| chr5:108867766-108897848  | 30  | FER       |
| chr1:240294821-240438210  | 15  | FMN2      |
| chr9:20862577-20885230    | 29  | FOCAD     |
| chr2:48328560-48359147    | 17  | FOXN2     |
| chr10:130166506-130171636 | 32  | GLRX3     |
| chr9:124898548-124912026  | 16  | GOLGA1    |
| chr16:11875760-11876175   | 4   | GSPT1     |
| chr4:105717592-105729499  | 26  | GSTCD     |
| chr12:112306063-112319742 | 49  | HECTD4    |
| chr10:94590637-94596956   | 11  | HELLS     |
| chr15:63655741-63658718   | 5   | HERC1     |
| chr20:3218516-3218994     | 34  | ITPA      |
| chr10:92637183-92650517   | 12  | KIF11     |
| chr1:225417983-225424089  | 21  | LBR       |
| chr16:72284571-72291413   | 21  | LINC01572 |
| chr4:150735257-150849575  | 4   | LRBA      |
| chr1:235773841-235777308  | 11  | LYST      |
| chr6:52276267-52277198    | 26  | MCM3      |
| chr18:50924097-50932360   | 34  | ME2       |
| chr8:17341362-17349081    | 21  | MTMR7     |
| chr13:77257670-77264002   | 2   | MYCBP2    |
| chr15:71991102-72027793   | 18  | MYO9A     |
| chr1:53800692-53809746    | 2   | NDC1      |
| chr8:95035453-95047127    | 12  | NDUFAF6   |
| chr16:68157868-68183366   | 28  | NFATC3    |

|                           |     |                        |
|---------------------------|-----|------------------------|
| chr12:32319836-32320393   | 10  | nogene                 |
| chr16:89587716-89588100   | 79  | nogene                 |
| chr17:42241262-42241552   | 12  | nogene                 |
| chr5:160302049-160302544  | 14  | nogene                 |
| chr1:5927648-5952836      | 49  | NPHP4                  |
| chr7:44618823-44624565    | 12  | OGDH                   |
| chr2:200935698-200937966  | 14  | ORC2                   |
| chr18:24280841-24312106   | 13  | OSBPL1A                |
| chr3:38183002-38236961    | 14  | OXSR1                  |
| chr5:50750150-50778650    | 12  | PARP8                  |
| chr13:100257594-100340259 | 3   | PCCA                   |
| chr1:233160282-233179175  | 2   | PCNXL2                 |
| chr2:44338350-44346390    | 16  | PREPL                  |
| chr3:48765003-48794049    | 16  | PRKAR2A                |
| chr2:37274420-37279929    | 2   | PRKD3                  |
| chr8:47836337-47839246    | 31  | PRKDC                  |
| chr17:59197543-59197789   | 50  | PRR11                  |
| chr2:231075510-231087181  | 106 | PSMD1                  |
| chr8:60584207-60591969    | 85  | RAB2A                  |
| chr2:108769259-108773046  | 20  | RANBP2                 |
| chr16:74651919-74661451   | 57  | RFWD3                  |
| chr8:86486483-86488639    | 36  | RMDN1                  |
| chr15:59030803-59067083   | 14  | RNF111                 |
| chr3:134175608-134191974  | 30  | RYK                    |
| chr19:5653114-5653420     | 34  | SAFB                   |
| chr11:10028451-10031170   | 3   | SBF2                   |
| chr6:75621531-75623960    | 18  | SENP6                  |
| chr6:75634706-75663518    | 71  | SENP6                  |
| chr6:158128107-158144420  | 11  | SERAC1                 |
| chr16:70541668-70544533   | 29  | SF3B3                  |
| chr5:128131066-128135808  | 21  | SLC12A2                |
| chr2:40139400-40164984    | 29  | SLC8A1                 |
| chr20:10449355-10458231   | 5   | SLX4IP                 |
| chr16:18839697-18842454   | 12  | SMG1                   |
| chr17:64561499-64562966   | 117 | SMURF2                 |
| chr7:100355142-100359537  | 28  | STAG3L5P-PVRIG2P-PILRB |
| chr10:17693221-17696869   | 2   | STAM                   |
| chr10:132222640-132228128 | 13  | STK32C                 |
| chr1:36358238-36358822    | 16  | STK40                  |
| chr1:36358238-36362656    | 33  | STK40                  |
| chr3:31576395-31600459    | 19  | STT3B                  |
| chr4:4611493-4649542      | 23  | STX18-AS1              |
| chr4:55403235-55417985    | 24  | TMEM165                |

|                          |     |              |
|--------------------------|-----|--------------|
| chr6:158573419-158605347 | 18  | TMEM181      |
| chr7:66240324-66286709   | 476 | TPST1        |
| chr14:75882684-75902224  | 53  | TTLL5        |
| chr17:15553684-15555364  | 25  | TVP23C-CDRT4 |
| chr7:93252652-93259632   | 29  | VPS50        |
| chr5:37697654-37727045   | 2   | WDR70        |
| chr1:40267785-40272035   | 72  | ZMPSTE24     |
| chrX:47982948-47983411   | 15  | ZNF182       |
| chr7:149166157-149166930 | 37  | ZNF398       |
| chr20:32366383-32369883  | 17  | ASXL1        |
| chr10:84417770-84432098  | 14  | CCSER2       |
| chr20:34072065-34076815  | 12  | RALY         |
| chr1:111691333-111709264 | 24  | RAP1A        |
| chr6:36083030-36091043   | 11  | nogene       |
| chr7:102070338-102115273 | 15  | CUX1         |
| chr4:75656923-75662049   | 10  | G3BP2        |
| chr16:4650364-4652824    | 19  | MGRN1        |
| chr2:199323802-199328910 | 14  | SATB2        |
| chr18:76378854-76380303  | 75  | ZNF516       |
| chr1:179118586-179120274 | 33  | ABL2         |
| chr7:140781575-140783157 | 3   | BRAF         |
| chr13:23805949-23870195  | 30  | MIPEP        |
| chr2:26069573-26069800   | 51  | nogene       |
| chr10:45892431-45900426  | 10  | PARGP1       |
| chr8:127932052-127939676 | 10  | PVT1         |
| chr10:67887416-67906937  | 3   | SIRT1        |
| chr4:26683674-26720125   | 12  | TBC1D19      |
| chr1:52465069-52472102   | 3   | ZCCHC11      |
| chr1:23071224-23072197   | 103 | KDM1A        |
| chr3:186797534-186804724 | 19  | RFC4         |
| chr17:59586152-59588053  | 14  | DHX40        |
| chr5:50399858-50411383   | 18  | EMB          |
| chr1:220114313-220140289 | 14  | IARS2        |
| chr1:37980585-37984779   | 4   | SF3A3        |
| chr6:169632946-169638660 | 21  | WDR27        |
| chr4:73120161-73125312   | 43  | ANKRD17      |
| chr1:160237134-160244034 | 3   | DCAF8        |
| chr7:7873286-7884346     | 4   | nogene       |
| chr7:140781575-140794467 | 15  | BRAF         |
| chr18:45876235-45879214  | 2   | EPG5         |
| chr22:26457858-26458577  | 76  | HPS4         |
| chr13:20983223-20983806  | 5   | LATS2        |
| chr10:26705285-26709768  | 20  | PDSS1        |

|                           |     |          |
|---------------------------|-----|----------|
| chrX:361404-362332        | 148 | PPP2R3B  |
| chr1:31907660-31919658    | 17  | PTP4A2   |
| chr5:72848384-72865729    | 4   | TNPO1    |
| chr11:107308282-107336713 | 3   | CWF19L2  |
| chr9:83679774-83683066    | 58  | UBQLN1   |
| chr2:96797011-96797647    | 4   | CNNM4    |
| chr8:140605523-140605914  | 30  | nogene   |
| chr8:135542653-135582073  | 18  | KHDRBS3  |
| chr6:13639562-13644729    | 171 | RANBP9   |
| chr15:75876186-75879188   | 3   | UBE2Q2   |
| chr5:31448546-31472232    | 26  | DROSHA   |
| chr6:18159882-18166378    | 136 | KDM1B    |
| chr2:37989540-37997514    | 2   | RMDN2    |
| chr2:54813231-54820462    | 16  | EML6     |
| chrX:14850504-14859334    | 85  | FANCB    |
| chr6:36515337-36540204    | 13  | STK38    |
| chr8:95031994-95048558    | 30  | NDUFAF6  |
| chr14:54966474-54987387   | 19  | WDHD1    |
| chr13:30230510-30283791   | 14  | KATNAL1  |
| chr17:5331948-5332152     | 43  | RABEP1   |
| chr1:229486370-229498306  | 17  | NUP133   |
| chr17:30796159-30804108   | 3   | CRLF3    |
| chr20:47623910-47633636   | 31  | NCOA3    |
| chr17:67853939-67854762   | 54  | BPTF     |
| chr11:117161144-117163892 | 19  | PAFAH1B2 |
| chr7:32874706-32875157    | 24  | KBTBD2   |
| chr5:177041125-177050936  | 112 | ZNF346   |
| chr16:16014490-16016621   | 8   | ABCC1    |
| chr19:40705095-40705447   | 28  | ADCK4    |
| chr1:31737428-31740541    | 2   | ADGRB2   |
| chr22:49775590-49777813   | 14  | BRD1     |
| chr7:65755779-65756574    | 71  | CCT6P1   |
| chr15:49137149-49139653   | 30  | COPS2    |
| chr22:38493709-38494802   | 10  | DDX17    |
| chr6:167022408-167044576  | 23  | FGFR10P  |
| chr13:49168612-49178654   | 54  | FNDC3A   |
| chr20:25417103-25425327   | 21  | GINS1    |
| chr7:50732271-50762014    | 6   | GRB10    |
| chr3:160300882-160307781  | 14  | IFT80    |
| chr4:127663380-127687867  | 13  | INTU     |
| chr7:156734176-156763795  | 13  | LMBR1    |
| chr13:35040932-35058863   | 2   | NBEA     |
| chr1:25318062-25319218    | 11  | nogene   |

|                           |     |            |
|---------------------------|-----|------------|
| chr15:96334075-96342998   | 11  | NR2F2      |
| chr17:2672654-2676606     | 10  | PAFAH1B1   |
| chr10:49841949-49865381   | 24  | PARG       |
| chr15:43761423-43763206   | 39  | PDIA3      |
| chr11:68600340-68603492   | 31  | PPP6R3     |
| chr7:155672866-155700944  | 4   | RBM33      |
| chr1:32825312-32830067    | 42  | S100PBP    |
| chr10:100507424-100509102 | 2   | SEC31B     |
| chr3:196930812-196932023  | 20  | SENP5      |
| chr10:116901764-116915484 | 4   | SHTN1      |
| chr13:24222818-24251862   | 29  | SPATA13    |
| chr4:39215840-39218105    | 2   | WDR19      |
| chr14:88574692-88578140   | 120 | ZC3H14     |
| chr6:87215902-87245644    | 14  | ZNF292     |
| chr20:25634048-25634827   | 42  | ZNF337-AS1 |
| chr2:111872629-111878971  | 42  | ANAPC1     |
| chr1:23323555-23333631    | 19  | HNRNPR     |
| chr19:48149762-48150210   | 10  | LIG1       |
| chr12:112472943-112478015 | 26  | PTPN11     |
| chr21:29321220-29321514   | 12  | BACH1      |
| chr2:175964371-175995646  | 8   | KIAA1715   |
| chrX:24809897-24930549    | 3   | POLA1      |
| chr12:120565071-120566980 | 13  | RNF10      |
| chr15:42794643-42872758   | 12  | TTBK2      |
| chr5:34182679-34182867    | 173 | nogene     |
| chr15:85113872-85115487   | 100 | PDE8A      |
| chr1:52023490-52028630    | 24  | TXNDC12    |
| chr16:72522552-72570515   | 16  | LINC01572  |
| chr12:64455839-64474390   | 11  | TBK1       |
| chr6:43497880-43503706    | 62  | TJAP1      |
| chr5:37301436-37309267    | 5   | NUP155     |
| chr4:147909731-147946704  | 12  | ARHGAP10   |
| chr8:47293866-47407961    | 17  | SPIDR      |
| chr14:58219693-58223856   | 3   | ACTR10     |
| chr18:12366964-12367382   | 5   | AFG3L2     |
| chr2:235585724-235750488  | 26  | AGAP1      |
| chr1:243545509-243843282  | 46  | AKT3       |
| chr17:4206320-4235890     | 29  | ANKFY1     |
| chr1:93571669-93584121    | 7   | BCAR3      |
| chr16:15581216-15583238   | 30  | C16orf45   |
| chr12:405510-418636       | 30  | CCDC77     |
| chr20:49058452-49070297   | 2   | CSE1L      |
| chr11:70405264-70417123   | 6   | CTTN       |

|                           |     |          |
|---------------------------|-----|----------|
| chr10:101667885-101673673 | 13  | FBXW4    |
| chr15:83151214-83192308   | 8   | HDGFRP3  |
| chr5:56856599-56865977    | 12  | MAP3K1   |
| chr3:183379296-183389779  | 147 | MCF2L2   |
| chr8:125102013-125102487  | 3   | NSMCE2   |
| chr3:52658198-52679726    | 8   | PBRM1    |
| chr17:78392475-78399537   | 30  | PGS1     |
| chr6:143772257-143777383  | 2   | PHACTR2  |
| chr22:27853536-27873815   | 16  | PITPNB   |
| chr6:3727550-3739161      | 12  | PXDC1    |
| chr3:47037665-47046621    | 179 | SETD2    |
| chr6:157901897-157906212  | 7   | SNX9     |
| chr2:230442936-230449150  | 5   | SP100    |
| chr7:105293570-105297533  | 48  | SRPK2    |
| chr20:32155102-32158514   | 6   | TM9SF4   |
| chr4:183683974-183693147  | 3   | TRAPPC11 |
| chr6:126011252-126013101  | 16  | TRMT11   |
| chr15:77046788-77056255   | 33  | TSPAN3   |
| chr18:12308686-12311053   | 2   | TUBB6    |
| chr6:159736257-159743792  | 12  | WTAP     |
| chr1:32633644-32634110    | 19  | ZBTB8OS  |
| chr3:194433771-194450276  | 7   | ATP13A3  |
| chr9:130076411-130086476  | 2   | GPR107   |
| chr17:39564759-39566892   | 21  | nogene   |
| chr6:63646526-63680161    | 17  | PHF3     |
| chr1:227747691-227759485  | 25  | SNAP47   |
| chr19:19296988-19297344   | 142 | SUGP1    |
| chr17:82082696-82082913   | 14  | FASN     |
| chr2:11784885-11792006    | 19  | LPIN1    |
| chr17:29482196-29498521   | 2   | TAOK1    |
| chr16:27528597-27545523   | 9   | GTF3C1   |
| chr8:129862228-129904585  | 18  | FAM49B   |
| chr7:75052710-75057616    | 13  | WBSCR16  |
| chrX:135545422-135552146  | 71  | DDX26B   |
| chr17:66096250-66132763   | 21  | CEP112   |
| chr8:109271004-109293524  | 11  | NUDCD1   |
| chr9:129128984-129131639  | 28  | PPP2R4   |
| chr19:38917723-38918813   | 85  | SARS2    |
| chr13:35040932-35098405   | 2   | NBEA     |
| chr16:70528872-70529199   | 2   | SF3B3    |
| chr4:2642211-2642827      | 29  | nogene   |
| chr18:62838783-62860601   | 2   | PHLPP1   |
| chr17:37571790-37585430   | 2   | SYNRG    |



|                           |     |          |
|---------------------------|-----|----------|
| chr2:68490189-68538227    | 6   | APLF     |
| chr22:49794033-49824331   | 11  | BRD1     |
| chr14:44995745-45012075   | 31  | FAM179B  |
| chr6:89771560-89776695    | 2   | MDN1     |
| chr19:40292005-40295341   | 2   | nogene   |
| chr10:45939360-45965855   | 7   | PARGP1   |
| chr12:89466769-89472275   | 137 | POC1B    |
| chr12:45945248-45964188   | 90  | SCAF11   |
| chr16:89883350-89885966   | 38  | TCF25    |
| chr9:79652592-79654075    | 21  | TLE4     |
| chr6:43555835-43567354    | 96  | XPO5     |
| chr5:74796029-74839050    | 11  | FAM169A  |
| chr19:6749933-6750633     | 19  | TRIP10   |
| chr14:50635213-50649389   | 15  | nogene   |
| chr4:139517884-139523435  | 10  | SETD7    |
| chr19:1116947-1117322     | 3   | SBNO2    |
| chr19:45842249-45844200   | 3   | SYMPK    |
| chr19:45702903-45703294   | 19  | QPCTL    |
| chr15:42794643-42840433   | 38  | TTBK2    |
| chr14:34792774-34795765   | 7   | BAZ1A    |
| chr9:35705749-35706111    | 28  | TLN1     |
| chr2:113916883-113931396  | 25  | ACTR3    |
| chr6:135358131-135394896  | 15  | AHI1     |
| chr14:104775651-104792722 | 2   | AKT1     |
| chr12:45378052-45390498   | 15  | ANO6     |
| chr3:194448456-194454392  | 170 | ATP13A3  |
| chr21:39218151-39229436   | 26  | BRWD1    |
| chr1:244552321-244561145  | 7   | C1orf101 |
| chr1:186390710-186391791  | 14  | C1orf27  |
| chr10:77841880-77843706   | 13  | DLG5     |
| chr1:225038693-225097239  | 2   | DNAH14   |
| chr10:99907994-99909146   | 34  | DNMBP    |
| chr15:65490188-65500779   | 14  | DPP8     |
| chr6:52422917-52490350    | 3   | EFHC1    |
| chr21:32453311-32457720   | 4   | EVA1C    |
| chr11:47731373-47734129   | 11  | FNBP4    |
| chr22:35283961-35288407   | 4   | HMGXB4   |
| chr4:3186596-3189093      | 92  | HTT      |
| chr9:100272863-100284603  | 2   | INVS     |
| chr17:5013652-5014837     | 38  | KIF1C    |
| chr1:173755922-173757159  | 6   | KLHL20   |
| chr6:108323824-108402054  | 2   | LACE1    |
| chr6:149683078-149695221  | 11  | LATS1    |

|                           |     |                 |
|---------------------------|-----|-----------------|
| chr9:36594627-36607673    | 38  | MELK            |
| chr18:21815615-21819646   | 5   | MIB1            |
| chr2:42570436-42644244    | 10  | MTA3            |
| chr4:74174505-74181791    | 27  | MTHFD2L         |
| chr13:77224450-77233263   | 18  | MYCBP2          |
| chr9:131450549-131451118  | 14  | nogene          |
| chr12:102175482-102182627 | 13  | PARBPB          |
| chr13:32687133-32696902   | 11  | PDS5B           |
| chr1:28473553-28476291    | 57  | PHACTR4         |
| chr11:85996825-86003451   | 435 | PICALM          |
| chr11:17094260-17097264   | 3   | PIK3C2A         |
| chr14:49653989-49655843   | 15  | POLE2           |
| chr6:43583006-43583651    | 3   | POLH            |
| chr8:47849153-47855373    | 2   | PRKDC           |
| chr8:140846598-140890769  | 91  | PTK2            |
| chr20:18543018-18551175   | 91  | SEC23B          |
| chr7:80818298-80828745    | 62  | SEMA3C          |
| chr4:139529030-139533366  | 33  | SETD7           |
| chr17:35362738-35363826   | 17  | SLFN11          |
| chr4:20491760-20539584    | 30  | SLIT2           |
| chr17:2282646-2283735     | 14  | SMG6            |
| chr22:41866830-41868792   | 17  | SREBF2          |
| chr7:117098612-117138532  | 2   | ST7             |
| chr20:49135832-49154071   | 9   | STAU1           |
| chr17:82884144-82900731   | 161 | TBCD            |
| chr2:223881941-223884749  | 12  | WDFY1           |
| chr22:21700975-21710908   | 20  | YPEL1           |
| chr20:62854015-62857635   | 23  | TCFL5           |
| chr1:235612123-235612503  | 7   | nogene          |
| chr22:24338385-24347176   | 9   | SPECC1L-ADORA2A |
| chr6:170323078-170348323  | 3   | FAM120B         |
| chr11:94445809-94461036   | 17  | MRE11A          |
| chr5:65992709-65994864    | 36  | ERBB2IP         |
| chr13:19705661-19709599   | 33  | PSPC1           |
| chr5:109781395-109823837  | 82  | MAN2A1          |
| chr14:58291634-58293926   | 32  | PSMA3-AS1       |
| chr3:3137259-3144710      | 118 | TRNT1           |
| chr22:42831548-42847632   | 20  | ARFGAP3         |
| chr13:98883812-98885092   | 6   | DOCK9           |
| chr1:92563641-92636336    | 25  | EVI5            |
| chr7:5603256-5605384      | 2   | FSCN1           |
| chr7:65964322-65976202    | 31  | GUSB            |
| chr1:27668225-27669346    | 10  | IFI6            |

|                           |     |                |
|---------------------------|-----|----------------|
| chr6:18159882-18162924    | 14  | KDM1B          |
| chr7:152330600-152358675  | 97  | KMT2C          |
| chr2:134250049-134270550  | 7   | MGAT5          |
| chr2:42640172-42682589    | 12  | MTA3           |
| chr13:41369089-41372830   | 10  | NAA16          |
| chr17:59912683-59914703   | 9   | RPS6KB1        |
| chr17:18330554-18353817   | 28  | SHMT1          |
| chr16:68274690-68275249   | 232 | SLC7A6         |
| chr3:51684412-51684884    | 13  | TEX264         |
| chr8:139885878-139910300  | 27  | TRAPPC9        |
| chr2:61485767-61490776    | 139 | XPO1           |
| chr4:38054198-38103157    | 69  | TBC1D1         |
| chr17:30481142-30492753   | 148 | GOSR1          |
| chr3:12516610-12519197    | 13  | TSEN2          |
| chr2:239139683-239163923  | 7   | HDAC4          |
| chr19:50216184-50217771   | 3   | MYH14          |
| chr5:96729152-96737947    | 11  | CAST           |
| chr17:61919399-61925099   | 201 | INTS2          |
| chr12:116096668-116111512 | 115 | MED13L         |
| chr9:100441905-100442356  | 203 | MSANTD3-TMEFF1 |
| chr16:68181474-68191775   | 30  | NFATC3         |
| chr15:75414204-75422823   | 17  | SIN3A          |
| chr5:122795265-122808355  | 37  | SNX2           |
| chr17:63237813-63267873   | 5   | TANC2          |
| chr1:162576776-162655374  | 11  | UAP1           |
| chr17:49311311-49312042   | 89  | ZNF652         |
| chr9:85669484-85681335    | 34  | AGTPBP1        |
| chr7:92294888-92319512    | 69  | ANKIB1         |
| chr1:235252729-235260752  | 15  | ARID4B         |
| chrX:101140665-101148161  | 8   | CENPI          |
| chr10:68963290-68969121   | 24  | DDX21          |
| chr2:43794456-43801709    | 31  | DYNC2LI1       |
| chr5:95906522-95932713    | 50  | ELL2           |
| chr3:56660730-56671692    | 10  | FAM208A        |
| chr2:222639579-222648795  | 11  | FARSB          |
| chr4:102714437-102734571  | 3   | MANBA          |
| chr3:127710575-127781895  | 12  | MGLL           |
| chr12:6983001-6988369     | 57  | nogene         |
| chr5:170916464-170953702  | 12  | RANBP17        |
| chr22:39313750-39314106   | 16  | RPL3           |
| chr17:80619626-80643810   | 4   | RPTOR          |
| chr3:43332168-43343478    | 11  | SNRK           |
| chr20:17947485-17961326   | 11  | SNX5           |

|                           |     |         |
|---------------------------|-----|---------|
| chr11:9429673-9431003     | 732 | IPO7    |
| chr1:26296918-26298062    | 6   | UBXN11  |
| chr3:33663444-33696933    | 45  | CLASP2  |
| chr10:14932853-14935564   | 10  | DCLRE1C |
| chr2:69354488-69374113    | 27  | GFPT1   |
| chr15:22516875-22539247   | 78  | HERC2P2 |
| chr15:78476187-78483434   | 15  | IREB2   |
| chr14:59456437-59461173   | 3   | nogene  |
| chr18:12794383-12862744   | 6   | PTPN2   |
| chr3:119503531-119517315  | 165 | TIMMDC1 |
| chr3:41931843-41954807    | 17  | ULK4    |
| chr3:44929305-44959460    | 11  | ZDHHC3  |
| chr12:31392266-31409384   | 4   | DENND5B |
| chr13:25307805-25315467   | 23  | NUPL1   |
| chr2:54050957-54057360    | 13  | nogene  |
| chr10:27067156-27086609   | 10  | ANKRD26 |
| chr11:83206057-83211430   | 33  | ANKRD42 |
| chr7:2544908-2547478      | 2   | BRAT1   |
| chr11:126018329-126019765 | 10  | CDON    |
| chr12:108652271-108657423 | 14  | CORO1C  |
| chr3:197090911-197105005  | 2   | DLG1    |
| chr12:32708152-32718763   | 59  | DNM1L   |
| chr4:152332595-152337936  | 5   | FBXW7   |
| chr5:180316340-180336577  | 19  | GFPT2   |
| chr12:112219385-112228811 | 13  | HECTD4  |
| chr1:220102128-220102777  | 11  | IARS2   |
| chr17:46050532-46082542   | 18  | KANSL1  |
| chr10:77403861-77447869   | 10  | KCNMA1  |
| chr3:120334861-120335953  | 20  | LRRC58  |
| chr1:54205017-54205410    | 13  | MRPL37  |
| chr8:66572481-66576375    | 10  | MYBL1   |
| chr2:15275483-15277101    | 18  | NBAS    |
| chr9:33293652-33295427    | 6   | NFX1    |
| chr19:49331616-49332320   | 15  | nogene  |
| chr3:195248036-195248401  | 90  | nogene  |
| chr19:48911148-48913564   | 9   | NUCB1   |
| chr11:85981128-86007583   | 10  | PICALM  |
| chr17:28349082-28351800   | 3   | POLDIP2 |
| chr11:70349922-70356254   | 19  | PPFIA1  |
| chr14:22926132-22927660   | 437 | PRMT5   |
| chr9:112250928-112262599  | 28  | PTBP3   |
| chr1:100906851-100918127  | 12  | SLC30A7 |
| chr6:35857260-35872728    | 23  | SRPK1   |

|                           |     |          |
|---------------------------|-----|----------|
| chr3:129827802-129857405  | 4   | TMCC1    |
| chr22:40117054-40251200   | 2   | TNRC6B   |
| chr2:47005921-47011435    | 16  | TTC7A    |
| chr11:74906238-74927488   | 11  | XRRA1    |
| chr16:72811576-72812038   | 65  | ZFH3     |
| chr5:178860996-178867071  | 2   | ZNF354B  |
| chr9:114001995-114016784  | 3   | ZNF618   |
| chr9:111574733-111597432  | 6   | PTGR1    |
| chr4:67530814-67544195    | 5   | CENPC    |
| chr17:19909180-19924517   | 29  | AKAP10   |
| chr17:76328716-76332435   | 12  | PRPSAP1  |
| chr9:20881870-20933103    | 18  | FOCAD    |
| chr15:66481754-66485191   | 36  | MAP2K1   |
| chr22:20554935-20555148   | 53  | MED15    |
| chr18:50941168-50941468   | 13  | nogene   |
| chr18:7838335-7839401     | 16  | nogene   |
| chr1:224411426-224413335  | 4   | WDR26    |
| chrX:23730526-23733217    | 13  | ACOT9    |
| chr12:69253050-69262562   | 14  | CPSF6    |
| chr14:102043874-102044698 | 4   | DYNC1H1  |
| chr5:137985256-138018514  | 4   | FAM13B   |
| chr1:42227882-42278784    | 12  | FOXJ3    |
| chr6:141798082-141831645  | 8   | nogene   |
| chr22:23814100-23814695   | 6   | nogene   |
| chr11:117152440-117163892 | 588 | PAFAH1B2 |
| chr13:29523265-29536202   | 18  | SLC7A1   |
| chr13:98474820-98482321   | 36  | STK24    |
| chrX:71284396-71285097    | 10  | NONO     |
| chrX:103449273-103461354  | 2   | nogene   |
| chr15:76728594-76733384   | 15  | SCAPER   |
| chr11:46758922-46760784   | 4   | CKAP5    |
| chr13:59861406-59924870   | 18  | DIAPH3   |
| chr12:63626468-63647365   | 3   | DPY19L2  |
| chr18:36142280-36160015   | 23  | ELP2     |
| chr9:95897848-95907271    | 2   | ERCC6L2  |
| chr14:52780678-52784664   | 12  | GNPNAT1  |
| chr20:34768463-34792563   | 18  | NCOA6    |
| chr3:52743351-52752336    | 19  | NEK4     |
| chr3:23954536-23968023    | 15  | NR1D2    |
| chr5:168557422-168564065  | 16  | PANK3    |
| chr15:85064369-85067204   | 47  | PDE8A    |
| chr9:37489314-37493703    | 4   | POLR1E   |
| chr4:105370836-105399164  | 11  | PPA2     |

|                           |     |          |
|---------------------------|-----|----------|
| chrX:107639294-107642490  | 9   | PRPS1    |
| chr3:61989624-62003497    | 76  | PTPRG    |
| chr5:168493893-168497348  | 5   | RARS     |
| chr12:123315372-123317356 | 2   | SBNO1    |
| chr1:225987895-225988388  | 17  | SDE2     |
| chr3:72792915-72842402    | 16  | SHQ1     |
| chr9:100320264-100327962  | 5   | TEX10    |
| chr15:29766265-29772166   | 47  | TJP1     |
| chr3:129827802-129832826  | 42  | TMCC1    |
| chr18:31870371-31871120   | 36  | TRAPPC8  |
| chr6:148941278-148964563  | 16  | UST      |
| chr12:68816811-68824651   | 127 | MDM2     |
| chr11:76513385-76523291   | 3   | C11orf30 |
| chr1:227139575-227147559  | 87  | CDC42BPA |
| chr18:21560858-21566206   | 13  | ESCO1    |
| chr1:91343429-91353299    | 3   | HFM1     |
| chr11:20402918-20464546   | 4   | PRMT3    |
| chr8:96295097-96309622    | 4   | PTDSS1   |
| chr4:122927633-122979386  | 46  | SPATA5   |
| chr15:25393745-25411971   | 17  | UBE3A    |
| chr17:60343956-60344238   | 14  | nogene   |
| chr12:42374862-42393689   | 18  | PPHLN1   |
| chr10:31817787-31831800   | 10  | ARHGAP12 |
| chr11:129164318-129267361 | 11  | ARHGAP32 |
| chr8:61637946-61684188    | 33  | ASPH     |
| chr18:68836748-68897682   | 11  | CCDC102B |
| chr9:120477349-120518645  | 11  | CDK5RAP2 |
| chr16:11886470-11898035   | 11  | GSPT1    |
| chr5:43294055-43297673    | 11  | HMGCS1   |
| chr2:86151296-86159671    | 4   | IMMT     |
| chr17:47664158-47678413   | 21  | KPNB1    |
| chr12:132147280-132148895 | 11  | NOC4L    |
| chr7:73545516-73545868    | 5   | nogene   |
| chr12:11121009-11124323   | 12  | nogene   |
| chr19:32709184-32711905   | 19  | NUDT19   |
| chr1:28473553-28480604    | 67  | PHACTR4  |
| chr8:22474953-22498112    | 11  | PPP3CC   |
| chr5:145764930-145823134  | 31  | PRELID2  |
| chr3:47610065-47622341    | 8   | SMARCC1  |
| chr4:185247293-185288082  | 328 | SNX25    |
| chr1:150497529-150499293  | 8   | TARS2    |
| chr14:90676522-90730196   | 13  | TTC7B    |
| chr19:34443843-34467014   | 11  | UBA2     |

|                           |     |          |
|---------------------------|-----|----------|
| chr9:83661776-83669327    | 72  | UBQLN1   |
| chr2:135772419-135776351  | 10  | UBXN4    |
| chr19:29971192-30012531   | 6   | UR11     |
| chr4:143212317-143214943  | 11  | USP38    |
| chr7:130040950-130049144  | 15  | ZC3HC1   |
| chr1:112653597-112654671  | 25  | CAPZA1   |
| chr9:128508875-128509097  | 27  | GLE1     |
| chr3:195381008-195392147  | 74  | ACAP2    |
| chr5:65260599-65273447    | 206 | ADAMTS6  |
| chr16:30067233-30070029   | 27  | ALDOA    |
| chr12:111655565-111660675 | 13  | BRAP     |
| chr6:42934474-42938207    | 4   | CNPY3    |
| chr4:83272086-83279114    | 24  | COQ2     |
| chr9:123676719-123879021  | 10  | DENND1A  |
| chr3:32528445-32533097    | 2   | DYNC1LI1 |
| chr1:28035543-28058094    | 256 | EYA3     |
| chr12:50437734-50441643   | 71  | LARP4    |
| chr10:21670448-21682257   | 34  | MLLT10   |
| chr3:184161301-184161848  | 14  | nogene   |
| chr14:31561405-31562215   | 3   | NUBPL    |
| chr9:131174054-131189131  | 2   | NUP214   |
| chr2:55558774-55568363    | 6   | PPP4R3B  |
| chr7:105462620-105468463  | 124 | PUS7     |
| chr2:218580560-218584721  | 11  | RQCD1    |
| chr12:108543027-108549214 | 11  | SART3    |
| chr22:30406341-30407603   | 4   | SEC14L2  |
| chr7:99045697-99047882    | 3   | SMURF1   |
| chr17:20245925-20253586   | 3   | SPECC1   |
| chr1:162576776-162599355  | 36  | UAP1     |
| chr19:32615657-32622619   | 12  | ANKRD27  |
| chr2:215325240-215326138  | 14  | ATIC     |
| chr4:173195594-173248440  | 3   | GALNT7   |
| chr1:45633488-45642499    | 41  | GPBP1L1  |
| chr1:155926675-155929840  | 19  | KIAA0907 |
| chr9:33328580-33347117    | 21  | NFX1     |
| chr9:111914604-111917806  | 5   | UGCG     |
| chr16:53308685-53318340   | 3   | CHD9     |
| chr14:39345903-39348977   | 14  | CTAGE5   |
| chr8:108239957-108241913  | 3   | EIF3E    |
| chr3:131109802-131133956  | 7   | NEK11    |
| chr15:73570149-73573795   | 33  | NPTN     |
| chr7:75507366-75511114    | 16  | PMS2P3   |
| chr11:20426765-20464546   | 2   | PRMT3    |

|                           |     |          |
|---------------------------|-----|----------|
| chr4:13342238-13381594    | 2   | RAB28    |
| chr1:183512836-183517820  | 11  | SMG7     |
| chr10:96544075-96551411   | 10  | TM9SF3   |
| chr6:32126116-32127750    | 16  | ATF6B    |
| chr2:108846737-108856970  | 36  | CCDC138  |
| chr2:232811243-232812491  | 7   | GIGYF2   |
| chr11:68590659-68603492   | 14  | PPP6R3   |
| chr9:105348357-105361330  | 3   | SLC44A1  |
| chr17:42345558-42348539   | 35  | STAT3    |
| chr21:37108391-37126143   | 54  | TTC3     |
| chr8:6455142-6499929      | 19  | MCPH1    |
| chr12:19462509-19484053   | 24  | AEBP2    |
| chr17:6659924-6661413     | 5   | ALOX15P1 |
| chr1:184477464-184507682  | 37  | C1orf21  |
| chr12:75312847-75326527   | 13  | CAPS2    |
| chr9:152033-172172        | 32  | CBWD1    |
| chr7:133274981-133289116  | 20  | EXOC4    |
| chr4:41661419-41671594    | 134 | LIMCH1   |
| chrX:64348659-64359527    | 2   | MTMR8    |
| chr11:17356650-17357001   | 13  | NCR3LG1  |
| chr1:155562555-155562821  | 35  | nogene   |
| chr10:13849756-13849937   | 18  | nogene   |
| chr2:95832385-95834565    | 2   | nogene   |
| chr12:106376358-106380139 | 15  | POLR3B   |
| chr14:50150007-50150230   | 49  | SOS2     |
| chr6:121170404-121242339  | 41  | TBC1D32  |
| chr8:38114191-38119363    | 24  | ASH2L    |
| chr1:32030297-32045390    | 27  | KHDRBS1  |
| chr18:45899403-45904117   | 5   | EPG5     |
| chr5:93958776-94053227    | 11  | FAM172A  |
| chr13:51365702-51395483   | 12  | INTS6    |
| chr20:35842572-35871829   | 9   | PHF20    |
| chrX:115633999-115645099  | 2   | PLS3     |
| chr5:134666822-134671886  | 30  | SEC24A   |
| chr10:126996747-127000307 | 70  | DOCK1    |
| chr1:235830225-235833667  | 36  | LYST     |
| chr3:36996618-37007063    | 13  | MLH1     |
| chr10:68142939-68145526   | 13  | MYPN     |
| chr7:155706859-155707380  | 21  | RBM33    |
| chr16:67046151-67066798   | 11  | CBFB     |
| chr20:49074784-49089746   | 17  | CSE1L    |
| chr2:223884647-223899070  | 12  | WDFY1    |
| chr1:179131310-179133374  | 366 | ABL2     |



|                           |     |          |
|---------------------------|-----|----------|
| chr9:110194874-110198574  | 25  | nogene   |
| chr3:136713457-136720173  | 12  | nogene   |
| chr9:124321458-124327445  | 23  | NEK6     |
| chr17:66496200-66514466   | 35  | PRKCA    |
| chr19:53148680-53153793   | 26  | ZNF347   |
| chr21:33340998-33345360   | 17  | IFNAR1   |
| chr6:131160058-131169273  | 45  | AKAP7    |
| chr9:91325317-91356155    | 6   | AUH      |
| chr1:201852103-201858994  | 15  | IPO9     |
| chr14:102343820-102344389 | 9   | nogene   |
| chrX:68046993-68064177    | 11  | OPHN1    |
| chr7:106097689-106099282  | 19  | SYPL1    |
| chr14:22947170-22955176   | 47  | HAUS4    |
| chrX:101126708-101148161  | 77  | CENPI    |
| chr11:94485927-94490965   | 30  | MRE11A   |
| chr19:10931067-10931864   | 18  | nogene   |
| chr16:74923925-74942826   | 14  | WDR59    |
| chr4:7793680-7800653      | 10  | AFAP1    |
| chr10:95637092-95643206   | 38  | ALDH18A1 |
| chr7:6599828-6602140      | 11  | C7orf26  |
| chr7:23604085-23611553    | 36  | CCDC126  |
| chr16:1459106-1465338     | 27  | CLCN7    |
| chr10:5959753-5960567     | 57  | IL15RA   |
| chr11:67215339-67219403   | 9   | KDM2A    |
| chr19:34194477-34196763   | 123 | LSM14A   |
| chr22:28515626-28519320   | 11  | nogene   |
| chr3:195923811-195929081  | 19  | nogene   |
| chr4:145159502-145171720  | 165 | OTUD4    |
| chr7:140041643-140047007  | 26  | PARP12   |
| chr3:52576540-52579199    | 40  | PBRM1    |
| chr15:77252366-77284030   | 10  | PEAK1    |
| chr1:151027232-151028944  | 29  | PRUNE    |
| chr20:35713018-35725155   | 96  | RBM39    |
| chr8:86484871-86507112    | 19  | RMDN1    |
| chr20:13528432-13569586   | 67  | TASP1    |
| chr3:129880308-129880562  | 16  | TMCC1    |
| chr15:56704120-56707306   | 3   | ZNF280D  |
| chr20:5176647-5178956     | 15  | CDS2     |
| chr11:65504325-65505019   | 11  | nogene   |
| chr2:29120029-29174525    | 17  | nogene   |
| chr1:234418083-234472811  | 10  | TARBP1   |
| chr4:38014508-38021718    | 21  | TBC1D1   |
| chr11:85280533-85285365   | 5   | DLG2     |

|                           |     |         |
|---------------------------|-----|---------|
| chr7:22960255-22977421    | 26  | FAM126A |
| chr1:2393207-2403589      | 2   | nogene  |
| chr7:44624316-44666851    | 3   | OGDH    |
| chr15:38299372-38339895   | 5   | SPRED1  |
| chr3:69039550-69044595    | 15  | TMF1    |
| chr7:67009582-67018143    | 3   | TYW1    |
| chr21:42850040-42852324   | 17  | WDR4    |
| chr2:218656149-218656463  | 95  | ZNF142  |
| chr7:149266334-149278527  | 3   | ZNF783  |
| chr5:82252561-82254325    | 11  | ATG10   |
| chr18:69946733-69947433   | 8   | CD226   |
| chrX:129557324-129559001  | 7   | OCRL    |
| chr9:128492425-128492805  | 36  | ODF2    |
| chr11:47420263-47420727   | 13  | PSMC3   |
| chr1:203847183-203847687  | 25  | ZC3H11A |
| chr12:106999550-107000082 | 14  | CRY1    |
| chr15:50643339-50648885   | 29  | TRPM7   |
| chr14:88574692-88609803   | 6   | ZC3H14  |
| chr1:245927930-245929937  | 12  | SMYD3   |
| chr6:116698703-116716318  | 11  | KPNA5   |
| chr18:22990936-22996462   | 8   | RBBP8   |
| chr11:46433473-46435037   | 35  | AMBRA1  |
| chr12:48933576-48941188   | 5   | ARF3    |
| chr8:130358016-130401970  | 138 | ASAP1   |
| chr10:12760947-12769799   | 15  | CAMK1D  |
| chr4:182891288-182915575  | 24  | DCTD    |
| chr5:108883395-108946222  | 5   | FER     |
| chr12:42097441-42119171   | 18  | GXYLT1  |
| chr6:129491900-129492483  | 27  | LAMA2   |
| chr5:5292566-5293674      | 6   | nogene  |
| chr10:34251601-34269899   | 12  | PARD3   |
| chr1:214451804-214464957  | 30  | PTPN14  |
| chr1:30964673-30981405    | 11  | PUM1    |
| chr6:125045210-125076858  | 4   | RNF217  |
| chr10:68355352-68364113   | 23  | RUFY2   |
| chr4:82680706-82705413    | 16  | SCD5    |
| chr4:82854902-82857130    | 2   | SEC31A  |
| chr5:1057470-1065478      | 28  | SLC12A7 |
| chr16:66513730-66517877   | 21  | TK2     |
| chr6:126011252-126021280  | 13  | TRMT11  |
| chr17:68432215-68432835   | 23  | nogene  |
| chr8:23447679-23449997    | 12  | ENTPD4  |
| chr3:155893517-155916192  | 24  | GMPS    |

|                           |     |          |
|---------------------------|-----|----------|
| chr17:64522701-64526200   | 5   | CEP95    |
| chr17:44805253-44805577   | 28  | nogene   |
| chr1:202428854-202434768  | 10  | PPP1R12B |
| chr17:64583460-64586170   | 102 | SMURF2   |
| chr20:44972077-44995257   | 13  | STK4     |
| chr4:176711498-176731524  | 13  | VEGFC    |
| chr2:29133654-29157347    | 29  | CLIP4    |
| chr2:190900563-190931637  | 41  | GLS      |
| chr11:32927156-32935435   | 12  | QSER1    |
| chr10:70152262-70161931   | 71  | SAR1A    |
| chr10:110596397-110598290 | 537 | SMC3     |
| chr17:31982998-31988497   | 307 | SUZ12    |
| chr17:59012327-59041898   | 19  | TRIM37   |
| chr9:137180180-137180384  | 17  | ANAPC2   |
| chr10:92606264-92607237   | 17  | KIF11    |
| chr3:184327215-184331606  | 21  | EIF4G1   |
| chr4:112253207-112260862  | 26  | AP1AR    |
| chr11:120473049-120477526 | 123 | ARHGEF12 |
| chr14:80831142-80838278   | 6   | CEP128   |
| chr4:55475962-55482828    | 16  | CLOCK    |
| chr11:61356529-61357828   | 19  | CYB561A3 |
| chr10:126970701-127012374 | 17  | DOCK1    |
| chr4:139125163-139139497  | 131 | ELF2     |
| chr4:38931450-38935790    | 5   | FAM114A1 |
| chr9:112405623-112418958  | 2   | HSDL2    |
| chr15:90466000-90466436   | 15  | IQGAP1   |
| chr12:116237467-116237705 | 39  | MED13L   |
| chr10:101792838-101807901 | 3   | MGEA5    |
| chr6:31411071-31505871    | 37  | MICA     |
| chr9:126340507-126395697  | 91  | MVB12B   |
| chr16:68121986-68123121   | 974 | NFATC3   |
| chr4:10085992-10087508    | 11  | nogene   |
| chr7:129657345-129690546  | 7   | NRF1     |
| chr16:15044333-15048099   | 6   | NTAN1    |
| chr17:5410702-5416682     | 10  | NUP88    |
| chr7:44624316-44647534    | 28  | OGDH     |
| chr8:100717772-100718280  | 20  | PABPC1   |
| chr4:39910243-39925933    | 15  | PDS5A    |
| chr19:42117249-42122576   | 15  | POU2F2   |
| chr18:8076454-8088851     | 172 | PTPRM    |
| chr8:47279901-47294030    | 12  | SPIDR    |
| chr8:47273336-47440542    | 3   | SPIDR    |
| chr21:32368402-32375483   | 26  | URB1     |

|                           |     |            |
|---------------------------|-----|------------|
| chr7:75061206-75070769    | 2   | WBSCR16    |
| chr11:110136662-110159490 | 187 | ZC3H12C    |
| chr20:25632157-25634827   | 308 | ZNF337-AS1 |
| chr11:108258985-108267342 | 92  | ATM        |
| chr2:25623517-25628384    | 13  | DTNB       |
| chr14:70988566-71009724   | 4   | PCNX       |
| chr1:229539455-229549434  | 28  | ABCB10     |
| chr17:43521368-43522226   | 40  | DHX8       |
| chr1:206595717-206612357  | 14  | EIF2D      |
| chr6:108569561-108664889  | 30  | FOXO3      |
| chr14:92806735-92809519   | 10  | GOLGA5     |
| chr6:25515674-25520337    | 14  | LRRC16A    |
| chr3:185437446-185451395  | 7   | MAP3K13    |
| chr5:139871720-139880974  | 6   | NRG2       |
| chr11:3744508-3753408     | 15  | NUP98      |
| chr17:8253858-8258199     | 28  | PFAS       |
| chr15:64418540-64425631   | 38  | TRIP4      |
| chr1:39853969-39857417    | 147 | TRIT1      |
| chr6:158312050-158314268  | 49  | TULP4      |
| chr1:52293452-52303925    | 2   | ZFYVE9     |
| chr11:36633283-36648155   | 13  | C11orf74   |
| chr6:135438374-135457713  | 23  | AHI1       |
| chr12:22523425-22527892   | 9   | C2CD5      |
| chr10:68963290-68970350   | 15  | DDX21      |
| chr10:72340788-72341170   | 318 | DNAJB12    |
| chr16:68025414-68049550   | 62  | DUS2       |
| chr5:145587324-145591128  | 33  | nogene     |
| chr2:237682624-237683495  | 18  | nogene     |
| chr17:76443581-76443967   | 12  | nogene     |
| chr7:44674410-44676149    | 67  | OGDH       |
| chr3:133612388-133624175  | 7   | TOPBP1     |
| chr19:55404060-55404478   | 5   | UBE2S      |
| chr19:4941527-4941931     | 136 | UHRF1      |
| chr9:94278757-94293069    | 67  | ZNF169     |
| chr5:151062126-151065131  | 21  | TNIP1      |
| chr14:29712937-29725674   | 16  | PRKD1      |
| chr9:107302034-107311737  | 13  | RAD23B     |
| chr16:71756018-71764726   | 19  | AP1G1      |
| chr2:61482956-61490776    | 104 | XPO1       |
| chr9:91694319-91722580    | 11  | nogene     |
| chr9:132896788-132897183  | 10  | TSC1       |
| chr5:84060299-84066606    | 24  | EDIL3      |
| chr12:101780151-101790057 | 11  | GNPTAB     |

|                           |     |           |
|---------------------------|-----|-----------|
| chr13:46368041-46368815   | 11  | KIAA0226L |
| chr11:12204249-12208139   | 11  | MICAL2    |
| chr9:128968505-128973249  | 12  | NUP188    |
| chr7:77920278-77922778    | 10  | PHTF2     |
| chr9:94064733-94095454    | 20  | PTPDC1    |
| chr1:173978487-173993135  | 11  | RC3H1     |
| chr17:32173830-32183272   | 49  | RHOT1     |
| chr11:224077-233215       | 17  | SIRT3     |
| chr5:128131066-128141981  | 65  | SLC12A2   |
| chr7:127976651-127991056  | 6   | SND1      |
| chr16:69384579-69385486   | 14  | TERF2     |
| chr19:12702822-12703801   | 11  | TNPO2     |
| chr9:37126311-37302231    | 12  | ZCCHC7    |
| chr9:37126311-37219098    | 11  | ZCCHC7    |
| chr9:106972004-107003426  | 12  | ZNF462    |
| chr10:119836895-119849576 | 3   | MCMBP     |
| chr7:103300177-103304490  | 2   | PMPCB     |
| chr8:66572481-66602523    | 6   | MYBL1     |
| chr5:38903881-38919062    | 3   | OSMR      |
| chr4:121833230-121839696  | 11  | BBS7      |
| chr5:123573392-123575963  | 13  | CSNK1G3   |
| chr17:51217333-51225183   | 6   | MBTD1     |
| chr5:112766325-112780903  | 10  | APC       |
| chr6:118894026-118895339  | 2   | nogene    |
| chr2:222927016-222934687  | 14  | ACSL3     |
| chr16:74632522-74637970   | 42  | RFWD3     |
| chr5:153997802-154034967  | 93  | FAM114A2  |
| chr6:73440208-73445747    | 11  | MB21D1    |
| chr4:106171094-106236808  | 9   | TBCK      |
| chr7:92343023-92371607    | 24  | ANKIB1    |
| chr3:32534510-32545965    | 3   | DYNC1LI1  |
| chr8:47927193-47927890    | 26  | PRKDC     |
| chr11:93736140-93736751   | 4   | TAF1D     |
| chr3:97895958-97900485    | 12  | CRYBG3    |
| chr2:23887831-23895970    | 12  | ATAD2B    |
| chr11:119232447-119232729 | 5   | CBL       |
| chr10:127052680-127127764 | 6   | DOCK1     |
| chr19:11513055-11514221   | 351 | ECSIT     |
| chr10:73174686-73210438   | 25  | FAM149B1  |
| chr6:35619095-35646850    | 57  | FKBP5     |
| chr10:836402-845055       | 49  | LARP4B    |
| chr12:12124564-12130893   | 4   | LRP6      |
| chr16:72349045-72391215   | 18  | nogene    |

|                           |     |         |
|---------------------------|-----|---------|
| chr1:28011305-28011711    | 16  | nogene  |
| chr1:233054267-233095863  | 7   | PCNXL2  |
| chr8:132836539-132844318  | 9   | PHF20L1 |
| chr12:68650399-68654252   | 108 | RAP1B   |
| chrX:72275052-72276234    | 2   | RPS4X   |
| chr19:38099961-38101226   | 10  | SIPA1L3 |
| chr4:102304316-102315830  | 215 | SLC39A8 |
| chr17:2282646-2292977     | 3   | SMG6    |
| chr11:64194188-64197974   | 37  | STIP1   |
| chr1:224404429-224424654  | 2   | WDR26   |
| chr14:50321482-50322719   | 13  | ATP5S   |
| chr8:67103036-67118821    | 18  | CSPP1   |
| chr4:6967303-7004924      | 8   | TBC1D14 |
| chr17:75812111-75813878   | 32  | UNK     |
| chr14:30902535-30913657   | 12  | STRN3   |
| chr10:150096-180128       | 5   | ZMYND11 |
| chr19:38130497-38130772   | 55  | SIPA1L3 |
| chr22:40835559-40850880   | 10  | ST13    |
| chr2:61495454-61498913    | 62  | XPO1    |
| chr1:165679441-165695397  | 18  | ALDH9A1 |
| chr19:4430548-4433539     | 13  | CHAF1A  |
| chr11:9193493-9207632     | 24  | DENND5A |
| chr19:45854174-45854507   | 68  | SYMPK   |
| chr16:14593300-14604226   | 87  | PARN    |
| chr10:119072889-119073577 | 13  | EIF3A   |
| chr9:12610904-12631607    | 6   | nogene  |
| chr4:189855885-189937333  | 5   | nogene  |
| chr9:98018288-98026451    | 20  | nogene  |
| chr19:3656404-3662001     | 10  | PIP5K1C |
| chr5:69174876-69175537    | 565 | CCNB1   |
| chr4:142402937-142433830  | 6   | INPP4B  |
| chr18:77066297-77105286   | 16  | MBP     |
| chr1:198277960-198297240  | 31  | NEK7    |
| chr1:229466633-229487613  | 26  | NUP133  |
| chr1:64777622-64814840    | 34  | RAVER2  |
| chr20:35716739-35725155   | 348 | RBM39   |
| chr6:35872562-35891013    | 4   | SRPK1   |
| chr9:99915177-99928843    | 86  | STX17   |
| chr1:228394736-228395252  | 27  | TRIM11  |
| chr19:29985222-30005708   | 18  | URI1    |
| chr12:1754257-1772961     | 31  | ADIPOR2 |
| chr3:15028585-15030452    | 23  | NR2C2   |
| chr7:74356409-74357477    | 65  | CLIP2   |

|                           |     |          |
|---------------------------|-----|----------|
| chr16:48252224-48277479   | 3   | LONP2    |
| chr11:108070095-108078240 | 5   | CUL5     |
| chr16:84099052-84102107   | 16  | MBTPS1   |
| chr21:43004325-43031617   | 13  | PKNOX1   |
| chr11:32587011-32595013   | 4   | EIF3M    |
| chr17:82248874-82255577   | 3   | CSNK1D   |
| chr9:33026474-33026990    | 33  | DNAJA1   |
| chr22:32478980-32493281   | 48  | FBXO7    |
| chr2:30525586-30533314    | 275 | LCLAT1   |
| chr17:8257806-8258199     | 17  | PFAS     |
| chr20:35858301-35863400   | 21  | PHF20    |
| chr16:11721576-11736233   | 79  | TXNDC11  |
| chr20:41267462-41269083   | 57  | ZHX3     |
| chr3:50252099-50253184    | 94  | GNAI2    |
| chr2:36509982-36522313    | 38  | CRIM1    |
| chrX:44961283-45020730    | 12  | KDM6A    |
| chr1:243683196-243843282  | 23  | AKT3     |
| chr12:110029477-110030758 | 3   | ANKRD13A |
| chrX:2618739-2626642      | 21  | CD99P1   |
| chr5:65528451-65529199    | 60  | CENPK    |
| chr16:4405490-4413404     | 23  | CORO7    |
| chr11:61410937-61411937   | 13  | CPSF7    |
| chr15:76283756-76295737   | 53  | ETFA     |
| chr6:108319616-108324048  | 10  | LACE1    |
| chr19:2076810-2078679     | 10  | MOB3A    |
| chr5:145438071-145473315  | 20  | nogene   |
| chr20:62256056-62263691   | 108 | OSBPL2   |
| chr10:87864453-87933251   | 56  | PTEN     |
| chr8:140789473-140803650  | 220 | PTK2     |
| chr6:106602873-106622969  | 7   | RTN4IP1  |
| chr17:2372488-2372926     | 14  | SGSM2    |
| chr2:128164729-128173939  | 7   | UGGT1    |
| chr6:99464603-99510230    | 16  | USP45    |
| chr16:88627621-88628854   | 14  | ZC3H18   |
| chr8:134509618-134590355  | 6   | ZFAT     |
| chr17:4051970-4064829     | 15  | ZZEF1    |
| chr11:46433473-46443598   | 21  | AMBRA1   |
| chr2:97576378-97580568    | 11  | ANKRD36B |
| chr15:72544819-72582187   | 2   | ARIH1    |
| chr15:40602914-40615378   | 2   | CASC5    |
| chr10:32451591-32462703   | 31  | CCDC7    |
| chr9:33271151-33278225    | 71  | CHMP5    |
| chr11:68799217-68807638   | 2   | CPT1A    |

|                                     |     |         |
|-------------------------------------|-----|---------|
| chr10:73156274-73156655             | 7   | ECD     |
| chr7:2374527-2377075                | 92  | EIF3B   |
| chr4:5729306-5756362                | 2   | EVC     |
| chr12:116949617-116964854           | 15  | FBXW8   |
| chr10:13663452-13666325             | 3   | FRMD4A  |
| chr9:124885359-124888396            | 2   | GOLGA1  |
| chr5:135345967-135370142            | 10  | H2AFY   |
| chr4:82355303-82359639              | 2   | HNRNPD  |
| chr2:197523623-197550386            | 11  | MOB4    |
| chr1:236824118-236826896            | 27  | MTR     |
| chr14_GL000194v1_random:92152-92446 | 4   | nogene  |
| chr19:51689771-51690145             | 10  | nogene  |
| chr7:74563821-74564062              | 13  | nogene  |
| chr2:241140520-241143074            | 41  | PASK    |
| chr15:85113376-85126374             | 3   | PDE8A   |
| chr9:131436619-131455166            | 2   | PRRC2B  |
| chr12:69755383-69756663             | 157 | RAB3IP  |
| chr5:179562546-179569425            | 3   | RUFY1   |
| chr6:130312977-130341122            | 16  | SAMD3   |
| chr1:246726891-246740301            | 90  | SCCPDH  |
| chr2:168012633-168065381            | 68  | STK39   |
| chr6:158573419-158607343            | 2   | TMEM181 |
| chr17:59075646-59081219             | 14  | TRIM37  |
| chr14:90644047-90655110             | 10  | TTC7B   |
| chr1:83904078-83933766              | 2   | TTLL7   |
| chr17:21015751-21028674             | 24  | USP22   |
| chr6:135318518-135323324            | 21  | AHI1    |
| chr17:81053667-81086580             | 13  | BAIAP2  |
| chr19:49139667-49140088             | 13  | PPFIA3  |
| chr2:10046149-10048595              | 4   | KLF11   |
| chr5:33453288-33456227              | 7   | TARS    |
| chrX:70341798-70376210              | 8   | KIF4A   |
| chr2:231206197-231262398            | 14  | ARMC9   |
| chr13:23805949-23809924             | 20  | MIPEP   |
| chr9:100126382-100131954            | 5   | INVS    |
| chr5:177164850-177165266            | 6   | nogene  |
| chr8:95252187-95263774              | 14  | C8orf37 |
| chr21:41854565-41860372             | 49  | PRDM15  |
| chr4:82824554-82827632              | 7   | SEC31A  |
| chr6:159682473-159688242            | 92  | SOD2    |
| chr20:37777344-37803048             | 11  | CTNNBL1 |
| chr16:53810139-53826491             | 32  | FTO     |
| chr4:127669035-127687867            | 101 | INTU    |



|                           |     |              |
|---------------------------|-----|--------------|
| chr11:9428539-9431003     | 113 | IPO7         |
| chr4:128121825-128162317  | 12  | LARP1B       |
| chr6:89743149-89750532    | 23  | MDN1         |
| chrX:150699194-150718700  | 19  | MTMR1        |
| chr8:77578034-77582405    | 4   | nogene       |
| chr12:49441729-49461037   | 4   | SPATS2       |
| chr12:104311289-104325429 | 2   | TXNRD1       |
| chr1:21001198-21002808    | 171 | EIF4G3       |
| chr2:235750353-235799522  | 8   | AGAP1        |
| chr1:3682332-3707791      | 12  | TP73         |
| chr1:155346382-155347904  | 27  | ASH1L        |
| chr17:63435085-63437560   | 2   | CYB561       |
| chr5:133070373-133074126  | 13  | HSPA4        |
| chr7:129657342-129671543  | 16  | NRF1         |
| chr13:24441845-24449817   | 24  | PARP4        |
| chr11:596922-598502       | 17  | PHRF1        |
| chr17:37576340-37585430   | 25  | SYNRG        |
| chr17:15545784-15553829   | 80  | TVP23C-CDRT4 |
| chr16:74915869-74918008   | 11  | WDR59        |
| chr6:43546570-43551453    | 14  | XPO5         |
| chr3:104764378-104855451  | 15  | nogene       |
| chr5:223481-228333        | 3   | SDHA         |
| chr17:20204332-20205936   | 34  | SPECC1       |
| chr5:64788950-64804386    | 57  | CWC27        |
| chr17:82084512-82084953   | 5   | FASN         |
| chr15:41707727-41713496   | 23  | MGA          |
| chr2:203380207-203395780  | 6   | ABI2         |
| chr3:195357690-195392147  | 11  | ACAP2        |
| chr3:57575547-57584464    | 16  | ARF4         |
| chr4:152337801-152350124  | 15  | FBXW7        |
| chr1:92247061-92264638    | 3   | GLMN         |
| chr14:103654563-103654825 | 24  | KLC1         |
| chr9:22466115-22468710    | 16  | nogene       |
| chr14:71045132-71076419   | 18  | PCNX         |
| chr7:6387211-6405755      | 11  | RAC1         |
| chr10:7220410-7227937     | 17  | SFMBT2       |
| chr17:37576340-37579434   | 3   | SYNRG        |
| chr1:243199059-243211964  | 76  | CEP170       |
| chr19:32432715-32439910   | 13  | DPY19L3      |
| chrX:155033402-155051801  | 3   | FUNDC2       |
| chr13:30240459-30241681   | 5   | KATNAL1      |
| chr2:159745769-159748903  | 16  | 7-Mar        |
| chr3:136326802-136329984  | 14  | PCCB         |

|                           |     |              |
|---------------------------|-----|--------------|
| chr1:151427822-151430841  | 27  | POGZ         |
| chr11:82838386-82860117   | 4   | PRCP         |
| chr3:12599690-12604289    | 23  | RAF1         |
| chrX:20162963-20167747    | 33  | RPS6KA3      |
| chr4:75977645-75982037    | 17  | SDAD1        |
| chr16:29879863-29885749   | 6   | SEZ6L2       |
| chr2:109347673-109347949  | 34  | SH3RF3       |
| chr15:57063749-57091891   | 5   | TCF12        |
| chr17:18292644-18294785   | 34  | TOP3A        |
| chr3:51470928-51496780    | 11  | VPRBP        |
| chr17:15700207-15708247   | 30  | ZNF286A      |
| chr5:177041125-177044533  | 62  | ZNF346       |
| chr7:99493039-99494631    | 212 | ZNF394       |
| chr1:39853969-39862935    | 16  | TRIT1        |
| chr2:229512782-229547092  | 14  | DNER         |
| chr1:155921374-155923687  | 14  | KIAA0907     |
| chr11:36081652-36098461   | 52  | LDLRAD3      |
| chr7:2200261-2222754      | 11  | MAD1L1       |
| chr14:86028368-86070967   | 5   | LOC101928767 |
| chr7:149266334-149267222  | 13  | ZNF783       |
| chr2:55558774-55573777    | 15  | PPP4R3B      |
| chr11:102350843-102363716 | 20  | BIRC2        |
| chr2:72718102-72731245    | 26  | EXOC6B       |
| chr10:15816834-15834616   | 18  | FAM188A      |
| chr17:39424626-39432016   | 17  | MED1         |
| chr16:14586317-14617650   | 4   | PARN         |
| chr10:17603559-17604047   | 114 | HACD1        |
| chr17:64521401-64522895   | 5   | CEP95        |
| chr11:118556905-118559864 | 13  | IFT46        |
| chr13:30255446-30284882   | 13  | KATNAL1      |
| chr2:39331916-39337581    | 347 | MAP4K3       |
| chr4:118724590-118728053  | 3   | nogene       |
| chr16:66598177-66598840   | 39  | nogene       |
| chr18:24332941-24366966   | 6   | OSBPL1A      |
| chr1:151440927-151442205  | 8   | POGZ         |
| chr7:42926535-42927459    | 20  | PSMA2        |
| chr10:27117575-27121448   | 23  | YME1L1       |
| chr12:69592058-69593613   | 3   | CCT2         |
| chr4:4073032-4087393      | 14  | nogene       |
| chr11:107308282-107311232 | 3   | nogene       |
| chr1:151262160-151264028  | 29  | PSMD4        |
| chr2:9517900-9527954      | 15  | ADAM17       |
| chr2:201749711-201757759  | 3   | ALS2         |

|                           |     |              |
|---------------------------|-----|--------------|
| chr7:139146983-139148377  | 3   | TTC26        |
| chr5:65224319-65300131    | 4   | ADAMTS6      |
| chr5:149505446-149525171  | 4   | CSNK1A1      |
| chr15:41069569-41072058   | 38  | INO80        |
| chr5:102990271-103009866  | 9   | PAM          |
| chr13:30227411-30240565   | 12  | KATNAL1      |
| chr8:17558294-17562110    | 13  | SLC7A2       |
| chr1:145747994-145784596  | 6   | RNF115       |
| chr9:83659779-83669327    | 18  | UBQLN1       |
| chr22:21770502-21770906   | 16  | nogene       |
| chr16:89098590-89133262   | 11  | ACSF3        |
| chr2:32543240-32549481    | 17  | BIRC6        |
| chr1:151683355-151693483  | 18  | SNX27        |
| chr10:31461036-31495838   | 14  | ZEB1         |
| chr18:47868322-47896809   | 20  | SMAD2        |
| chr18:63350887-63362868   | 31  | KDSR         |
| chr1:93305387-93325895    | 26  | LOC100131564 |
| chr10:93313019-93316813   | 16  | MYOF         |
| chr12:104927972-104928694 | 142 | SLC41A2      |
| chr3:9365015-9366985      | 60  | THUMPD3      |
| chr1:244477540-244499079  | 6   | C1orf101     |
| chrX:41660438-41671530    | 31  | CASK         |
| chr2:120285873-120289757  | 12  | RALB         |
| chr12:26990449-27003390   | 40  | TM7SF3       |
| chr11:77355667-77379994   | 7   | PAK1         |
| chr3:57847196-57864716    | 17  | SLMAP        |
| chr18:9522159-9522509     | 7   | RALBP1       |
| chr20:44051305-44054526   | 12  | TOX2         |
| chr1:243613670-243664883  | 16  | AKT3         |
| chr8:61618977-61644632    | 50  | ASPH         |
| chr7:39987598-39997664    | 14  | CDK13        |
| chr9:120487293-120491477  | 16  | CDK5RAP2     |
| chr2:37032628-37041292    | 8   | HEATR5B      |
| chr17:8553954-8576831     | 11  | MYH10        |
| chr7:66805139-66805396    | 36  | RABGEF1      |
| chr4:106171094-106212835  | 103 | TBCK         |
| chr8:130159863-130169067  | 41  | ASAP1        |
| chr15:40165052-40170681   | 2   | BUB1B        |
| chr13:31941307-31946181   | 14  | EEF1DP3      |
| chr20:34093674-34098633   | 25  | EIF2S2       |
| chr1:193096647-193101204  | 9   | GLRX2        |
| chr6:149623102-149638560  | 105 | KATNA1       |
| chr10:99919709-99920185   | 13  | nogene       |

|                           |     |          |
|---------------------------|-----|----------|
| chr11:3691346-3700839     | 4   | NUP98    |
| chr11:74775145-74817714   | 31  | RNF169   |
| chr6:144789193-144793991  | 2   | UTRN     |
| chr11:44124788-44130138   | 10  | EXT2     |
| chr12:56746044-56751195   | 14  | PRIM1    |
| chr20:49279103-49280570   | 14  | ZFAS1    |
| chr6:87214997-87218731    | 10  | ZNF292   |
| chr5:69566966-69572550    | 4   | GTF2H2B  |
| chr7:45797477-45805289    | 19  | nogene   |
| chr9:136461176-136464562  | 10  | SEC16A   |
| chr4:888846-904779        | 10  | GAK      |
| chr19:41268222-41279176   | 41  | HNRNPUL1 |
| chr8:135542653-135557587  | 13  | KHDRBS3  |
| chr1:213071005-213129889  | 5   | RPS6KC1  |
| chr2:241601895-241603079  | 35  | THAP4    |
| chr16:2328452-2329854     | 76  | ABCA3    |
| chr16:16007815-16009901   | 23  | ABCC1    |
| chr1:35747906-35748604    | 60  | CLSPN    |
| chr2:207555627-207570321  | 9   | CREB1    |
| chr18:49329572-49379758   | 21  | DYM      |
| chr9:137728348-137754291  | 6   | EHMT1    |
| chr3:47498285-47511226    | 15  | ELP6     |
| chr14:88754511-88766867   | 32  | EML5     |
| chr9:93476255-93498886    | 113 | FAM120A  |
| chr12:116928022-116964854 | 49  | FBXW8    |
| chr2:190895151-190902026  | 2   | GLS      |
| chr4:6804522-6842204      | 18  | KIAA0232 |
| chr14:20996208-20996711   | 38  | METTL17  |
| chr5:65792453-65797693    | 3   | NLN      |
| chr5:155014042-155014637  | 6   | nogene   |
| chr1:220761655-220784071  | 19  | nogene   |
| chr19:57876305-57885415   | 33  | nogene   |
| chr17:77293431-77293827   | 14  | nogene   |
| chr8:47929091-47934090    | 8   | PRKDC    |
| chr4:42001615-42078325    | 19  | SLC30A9  |
| chr1:24666814-24670315    | 59  | SRRM1    |
| chr1:32810590-32811057    | 103 | YARS     |
| chr8:28963810-28970519    | 15  | HMBOX1   |
| chrX:96948934-96965207    | 11  | DIAPH2   |
| chr12:22659013-22684556   | 11  | ETNK1    |
| chr17:17171717-17180088   | 25  | MPRIP    |
| chr2:15488893-15534641    | 30  | NBAS     |
| chr7:128997388-129018157  | 12  | TNPO3    |

|                           |     |         |
|---------------------------|-----|---------|
| chr8:108229069-108241913  | 11  | EIF3E   |
| chr2:111233627-111239996  | 92  | nogene  |
| chr2:202952558-202961426  | 2   | CARF    |
| chr1:155725381-155727738  | 24  | DAP3    |
| chr3:192335360-192360538  | 10  | FGF12   |
| chr1:117414712-117442325  | 39  | MAN1A2  |
| chr1:99668622-99675498    | 3   | nogene  |
| chr7:135596188-135596636  | 11  | nogene  |
| chr3:27433915-27452498    | 42  | SLC4A7  |
| chr17:29666866-29703062   | 15  | SSH2    |
| chr6:44136348-44139759    | 7   | TMEM63B |
| chr3:78938600-78938927    | 42  | ROBO1   |
| chr6:169582835-169613656  | 18  | WDR27   |
| chr12:88106674-88107098   | 26  | CEP290  |
| chr6:33676767-33677089    | 12  | ITPR3   |
| chr3:33619602-33644903    | 150 | CLASP2  |
| chr15:67164894-67166853   | 31  | SMAD3   |
| chr2:111344060-111480061  | 33  | nogene  |
| chr3:56663540-56673725    | 21  | FAM208A |
| chr20:17952586-17957037   | 3   | SNX5    |
| chr4:107644801-107701285  | 20  | PAPSS1  |
| chr19:47040443-47042904   | 62  | NPAS1   |
| chr5:171199669-171221840  | 23  | RANBP17 |
| chr7:134221778-134249076  | 18  | LRGUK   |
| chr7:30456720-30457042    | 13  | NOD1    |
| chr22:38355889-38356270   | 6   | nogene  |
| chr8:124567646-124568914  | 14  | nogene  |
| chr12:108701123-108718954 | 31  | CORO1C  |
| chr10:67988662-68014186   | 17  | HERC4   |
| chr11:9408485-9417148     | 13  | IPO7    |
| chr7:131429032-131478677  | 10  | MKLN1   |
| chr2:9237832-9239953      | 2   | nogene  |
| chr17:66773986-66788979   | 10  | PRKCA   |
| chr2:151440026-151443709  | 5   | RIF1    |
| chr22:50459254-50464917   | 34  | SBF1    |
| chr1:246556572-246557534  | 45  | TFB2M   |
| chr14:91999239-92000108   | 3   | TRIP11  |
| chr6:150944485-150965037  | 11  | MTHFD1L |
| chr22:38298785-38314169   | 3   | CSNK1E  |
| chr19:49357251-49360081   | 3   | TEAD2   |
| chr2:30955617-30966302    | 17  | GALNT14 |
| chr16:4811169-4812248     | 92  | GLYR1   |
| chr19:48633443-48633655   | 9   | DBP     |

|                           |     |           |
|---------------------------|-----|-----------|
| chr17:31163185-31182665   | 20  | NF1       |
| chr16:57123413-57127903   | 6   | CPNE2     |
| chr11:66803994-66828364   | 9   | C11orf80  |
| chr16:16052723-16071729   | 2   | ABCC1     |
| chr20:34882793-34883615   | 2   | ACSS2     |
| chr11:78113885-78121174   | 45  | ALG8      |
| chr12:110013124-110030758 | 10  | ANKRD13A  |
| chr2:23823257-23823569    | 58  | ATAD2B    |
| chr6:84185186-84186623    | 46  | CEP162    |
| chr16:68038005-68061113   | 10  | DUS2      |
| chr14:101983018-101988852 | 10  | DYNC1H1   |
| chrX:152320808-152364596  | 2   | GABRA3    |
| chr12:101780151-101796762 | 10  | GNPTAB    |
| chr11:18402839-18403811   | 18  | LDHA      |
| chr10:13191298-13195269   | 19  | MCM10     |
| chr10:13172375-13189080   | 19  | MCM10     |
| chr4:139695196-139704196  | 27  | MGST2     |
| chr15:52425829-52433285   | 48  | MYO5A     |
| chr4:103536345-103552602  | 20  | nogene    |
| chr7:5432243-5434126      | 2   | nogene    |
| chr5:32724697-32739030    | 10  | NPR3      |
| chr14:90312393-90318113   | 2   | NRDE2     |
| chr1:149959683-149964349  | 45  | OTUD7B    |
| chr1:149964221-149977576  | 12  | OTUD7B    |
| chr15:72206727-72208891   | 15  | PKM       |
| chr7:43986600-43988247    | 18  | POLR2J4   |
| chr9:122989296-122990213  | 28  | RABGAP1   |
| chr7:66783674-66805396    | 2   | RABGEF1   |
| chr1:150951364-150962719  | 19  | SETDB1    |
| chr16:70532478-70535420   | 28  | SF3B3     |
| chr3:47701277-47714490    | 2   | SMARCC1   |
| chr16:70219911-70222480   | 40  | SMG1P7    |
| chr7:38207446-38219660    | 32  | STARD3NL  |
| chr7:90225366-90232484    | 12  | STEAP2    |
| chr10:69196991-69199197   | 17  | SUPV3L1   |
| chr15:50637421-50663046   | 9   | TRPM7     |
| chr14:90744791-90786328   | 28  | TTC7B     |
| chr5:37605063-37703087    | 2   | WDR70     |
| chr1:52281660-52303925    | 11  | ZFYVE9    |
| chr6:29890263-29944616    | 65  | HLA-H     |
| chr19:1356323-1358464     | 5   | MUM1      |
| chr6:73723250-73736508    | 173 | CD109     |
| chr7:21020867-21023309    | 26  | LINC01162 |

|                           |     |          |
|---------------------------|-----|----------|
| chr3:142743484-142762313  | 4   | TRPC1    |
| chr15:100609706-100612427 | 84  | ASB7     |
| chrX:2719660-2726373      | 15  | CD99     |
| chr12:31392266-31392696   | 48  | DENND5B  |
| chr13:41252644-41260915   | 52  | MTRF1    |
| chr1:147286297-147287733  | 219 | CHD1L    |
| chr15:44484223-44490999   | 27  | CTDSPL2  |
| chr15:65463760-65481615   | 5   | DPP8     |
| chr2:27642428-27647943    | 10  | GPN1     |
| chr16:1743331-1748720     | 17  | MAPK8IP3 |
| chr14:23475170-23477560   | 6   | NGDN     |
| chr12:87707646-87715112   | 13  | nogene   |
| chr2:44490785-44558013    | 3   | nogene   |
| chr3:56674436-56674937    | 21  | nogene   |
| chr16:2757471-2896771     | 3   | SRRM2    |
| chr16:88598177-88599948   | 3   | ZC3H18   |
| chr2:45976428-45980381    | 30  | PRKCE    |
| chr2:113729400-113735858  | 29  | SLC35F5  |
| chr11:86007541-86031611   | 327 | PICALM   |
| chr3:101656103-101672213  | 8   | ZBTB11   |
| chr8:61618977-61684188    | 55  | ASPH     |
| chr1:193141849-193152444  | 42  | CDC73    |
| chr10:122393180-122417968 | 14  | PLEKHA1  |
| chr10:122393180-122413045 | 7   | PLEKHA1  |
| chr3:140963126-140974005  | 16  | SLC25A36 |
| chr10:86472207-86473973   | 37  | WAPL     |
| chr14:96943516-96945382   | 41  | nogene   |
| chr12:26980565-27003390   | 13  | TM7SF3   |
| chr17:46050532-46067667   | 19  | KANSL1   |
| chr11:68569747-68576043   | 17  | PPP6R3   |
| chr2:175080659-175118369  | 5   | ATF2     |
| chr2:32524887-32549481    | 13  | BIRC6    |
| chr15:76274411-76292513   | 2   | ETFA     |
| chr20:34096656-34103565   | 13  | EIF2S2   |
| chr17:44174462-44174859   | 7   | nogene   |
| chr15:50941441-50950169   | 10  | AP4E1    |
| chr18:79110354-79126375   | 21  | ATP9B    |
| chr6:18236451-18249839    | 5   | DEK      |
| chr21:46484756-46511614   | 18  | DIP2A    |
| chr15:49575010-49590007   | 3   | FAM227B  |
| chr19:14479411-14492912   | 2   | GIPC1    |
| chr9:86040738-86052591    | 38  | GOLM1    |
| chr1:26884124-26886133    | 4   | GPN2     |

|                          |     |                 |
|--------------------------|-----|-----------------|
| chr8:33488377-33489139   | 8   | MAK16           |
| chr13:48079843-48083428  | 3   | MED4            |
| chr17:77176197-77176681  | 12  | nogene          |
| chr16:29793402-29794613  | 12  | nogene          |
| chr1:229495494-229496047 | 2   | NUP133          |
| chr3:138663905-138684803 | 13  | PIK3CB          |
| chr7:5986758-5992057     | 19  | PMS2            |
| chr7:75474703-75486247   | 12  | POM121C         |
| chr15:75517258-75527261  | 20  | PTPN9           |
| chr7:66712166-66712613   | 15  | RABGEF1         |
| chr3:11809516-11810897   | 11  | TAMM41          |
| chr2:43498832-43508780   | 10  | THADA           |
| chr5:113539073-113542503 | 20  | YTHDC2          |
| chr16:50287911-50288350  | 27  | ADCY7           |
| chr1:235480053-235489268 | 10  | B3GALNT2        |
| chr5:171868609-171900100 | 35  | FBXW11          |
| chr7:39781769-39789544   | 12  | LINC00265       |
| chr5:80778719-80792844   | 9   | MSH3            |
| chr3:123707753-123708895 | 5   | MYLK            |
| chr19:17172335-17172963  | 18  | MYO9B           |
| chr12:85685057-85713416  | 19  | nogene          |
| chr12:68715626-68732739  | 10  | NUP107          |
| chr5:149820432-149826885 | 18  | PPARGC1B        |
| chr1:32668224-32669563   | 31  | RBBP4           |
| chr3:27400763-27424152   | 17  | SLC4A7          |
| chr15:66535932-66540210  | 5   | ZWILCH          |
| chr8:100287500-100288267 | 20  | RNF19A          |
| chr6:15593058-15627475   | 4   | DTNBP1          |
| chr16:89895037-89900794  | 113 | TCF25           |
| chr1:36258665-36259484   | 14  | THRAP3          |
| chr13:21381433-21391854  | 16  | ZDHHC20         |
| chr5:140438460-140445975 | 80  | ANKHD1-EIF4EBP3 |
| chr5:78156257-78216237   | 12  | AP3B1           |
| chr17:40163480-40164166  | 14  | CASC3           |
| chr5:138566625-138569049 | 12  | HSPA9           |
| chr5:177269601-177288925 | 2   | NSD1            |
| chr1:52438219-52461769   | 2   | ZCCHC11         |
| chr2:231206199-231235381 | 3   | ARMC9           |
| chr18:36681435-36709391  | 20  | FHOD3           |
| chr10:96544075-96559736  | 14  | TM9SF3          |
| chr6:37929958-38116739   | 5   | ZFAND3          |
| chr6:149603267-149604782 | 9   | KATNA1          |
| chrX:112804946-112815877 | 13  | AMOT            |



|                           |     |           |
|---------------------------|-----|-----------|
| chr3:43598531-43605863    | 62  | ANO10     |
| chr2:24135118-24161613    | 19  | FAM228B   |
| chr18:62348167-62354534   | 18  | TNFRSF11A |
| chr2:68513079-68545312    | 3   | APLF      |
| chr4:147854675-147866816  | 12  | ARHGAP10  |
| chr15:72695176-72716850   | 51  | BBS4      |
| chr7:74338447-74339004    | 52  | CLIP2     |
| chr5:10386993-10394785    | 56  | 6-Mar     |
| chr16:71667177-71672322   | 20  | PHLPP2    |
| chr16:68880547-68902504   | 2   | TANGO6    |
| chr21:42873550-42876767   | 32  | WDR4      |
| chr10:42816598-42817494   | 16  | BMS1      |
| chr15:89273376-89276891   | 4   | FANCI     |
| chr3:121790072-121828972  | 11  | IQCB1     |
| chr4:17961902-17972885    | 294 | LCORL     |
| chr3:188882976-188883465  | 11  | nogene    |
| chr1:16620920-16624877    | 10  | nogene    |
| chr6:106640348-106643090  | 11  | QRSL1     |
| chr7:151470570-151498180  | 11  | RHEB      |
| chr1:47272075-47282459    | 11  | STIL      |
| chr9:106972004-106984409  | 49  | ZNF462    |
| chr17:16143605-16146548   | 20  | NCOR1     |
| chr16:14606483-14617650   | 4   | PARN      |
| chr11:9961956-9989595     | 15  | SBF2      |
| chr8:141175199-141178196  | 5   | DENND3    |
| chr1:162566011-162566348  | 138 | UAP1      |
| chr10:77794007-77796594   | 13  | DLG5      |
| chr8:43021954-43022920    | 15  | nogene    |
| chr8:118379559-118403227  | 55  | SAMD12    |
| chr20:21354788-21357792   | 3   | XRN2      |
| chr4:22389087-22392690    | 10  | ADGRA3    |
| chr11:108838445-108841476 | 16  | DDX10     |
| chr10:68437010-68470163   | 31  | DNA2      |
| chr1:169319158-169324500  | 24  | NME7      |
| chr12:121804723-121806105 | 3   | SETD1B    |
| chr1:154225083-154236611  | 9   | UBAP2L    |
| chr3:81577924-81586190    | 40  | GBE1      |
| chr16:48277337-48303305   | 264 | LONP2     |
| chr3:12574791-12576741    | 38  | MKRN2     |
| chr4:131409-218778        | 92  | ZNF718    |
| chr12:116945363-116964854 | 13  | FBXW8     |
| chr17:31993864-31994721   | 24  | SUZ12     |
| chr19:12526919-12528696   | 9   | ZNF564    |

|                           |     |          |
|---------------------------|-----|----------|
| chr1:16201781-16202574    | 35  | ARHGEF19 |
| chr12:64648536-64649552   | 8   | nogene   |
| chr19:39979816-39980717   | 10  | PSMC4    |
| chr17:50984922-50987237   | 2   | SPAG9    |
| chr12:7396094-7406852     | 3   | CD163L1  |
| chr12:110134947-110135437 | 3   | IFT81    |
| chr1:12005710-12009726    | 3   | MFN2     |
| chr15:72774871-72780322   | 13  | ADPGK    |
| chr16:2319580-2329854     | 11  | ABCA3    |
| chr15:60360940-60386086   | 17  | ANXA2    |
| chr3:141512162-141540609  | 92  | RASA2    |
| chr3:195306510-195345317  | 14  | ACAP2    |
| chrX:41346228-41346622    | 28  | DDX3X    |
| chr22:38636450-38639724   | 3   | FAM227A  |
| chr9:85596361-85633374    | 79  | AGTPBP1  |
| chr20:34291418-34294156   | 46  | AHCY     |
| chr12:99244341-99246864   | 3   | ANKS1B   |
| chr5:78110206-78129307    | 20  | AP3B1    |
| chr8:130358016-130402893  | 67  | ASAP1    |
| chr1:161819632-161821161  | 18  | ATF6     |
| chr17:60683981-60709325   | 2   | BCAS3    |
| chr12:31398174-31409384   | 23  | DENND5B  |
| chr18:49363160-49379758   | 73  | DYM      |
| chr5:94050730-94053227    | 7   | FAM172A  |
| chr1:236178413-236183906  | 100 | GPR137B  |
| chr10:1000676-1005907     | 9   | GTPBP4   |
| chr14:61720378-61721823   | 18  | HIF1A    |
| chr2:38591529-38597354    | 16  | HNRNPLL  |
| chr8:94827262-94832174    | 14  | INTS8    |
| chr3:37083635-37096660    | 16  | LRRFIP2  |
| chr6:136694139-136705133  | 4   | MAP3K5   |
| chr17:29103598-29107189   | 12  | MYO18A   |
| chr17:63028003-63099357   | 3   | nogene   |
| chr15:69462011-69462315   | 15  | nogene   |
| chr3:183833491-183868060  | 11  | PARL     |
| chr7:92517275-92519078    | 36  | PEX1     |
| chr3:195519017-195524896  | 5   | PPP1R2   |
| chr12:11047019-11124187   | 14  | PRH1     |
| chr12:112446275-112482205 | 4   | PTPN11   |
| chr2:135602499-135622732  | 10  | R3HDM1   |
| chr7:66771882-66805396    | 20  | RABGEF1  |
| chr9:4823547-4849550      | 40  | RCL1     |
| chr19:33011678-33012724   | 23  | RHPN2    |

|                           |     |              |
|---------------------------|-----|--------------|
| chr19:58392975-58393487   | 724 | RPS5         |
| chr5:139121034-139133471  | 7   | SIL1         |
| chr6:85533598-85542043    | 11  | SNX14        |
| chr1:204112914-204114605  | 53  | SOX13        |
| chr6:159784665-159785496  | 11  | TCP1         |
| chr21:31164961-31195305   | 7   | TIAM1        |
| chr21:44094062-44098534   | 24  | TRAPPC10     |
| chr2:229802251-229804227  | 23  | TRIP12       |
| chr2:28850327-28865119    | 69  | TRMT61B      |
| chr10:1084402-1096246     | 263 | WDR37        |
| chr1:77639448-77641655    | 39  | ZZZ3         |
| chr10:73192555-73193593   | 4   | FAM149B1     |
| chr3:70987993-71015653    | 13  | FOXP1        |
| chr5:87331347-87349364    | 25  | RASA1        |
| chr1:75732643-75733628    | 17  | ACADM        |
| chr1:36008689-36009594    | 4   | AGO3         |
| chr6:106279660-106308491  | 77  | ATG5         |
| chr20:51674152-51676208   | 11  | ATP9A        |
| chr16:53255599-53268126   | 24  | CHD9         |
| chr16:58534146-58534395   | 10  | CNOT1        |
| chr10:5709529-5717750     | 47  | FAM208B      |
| chr12:110128949-110147048 | 13  | IFT81        |
| chr1:11228667-11232528    | 10  | MTOR         |
| chr16:29841595-29842112   | 10  | MVP          |
| chr4:107644801-107660072  | 21  | PAPSS1       |
| chr20:35721739-35734257   | 5   | RBM39        |
| chr2:45488239-45562756    | 18  | SRBD1        |
| chr8:9704662-9710220      | 18  | TNKS         |
| chr5:65647054-65658501    | 11  | TRAPPC13     |
| chr10:5956378-5960567     | 4   | IL15RA       |
| chr19:18838616-18839120   | 17  | nogene       |
| chr1:52886955-52892975    | 13  | ZYG11A       |
| chr1:147648245-147659775  | 38  | ACP6         |
| chr10:18666574-18668677   | 12  | ARL5B        |
| chr1:179990506-180006567  | 16  | CEP350       |
| chr2:9428764-9436361      | 10  | CPSF3        |
| chr4:1951071-1961151      | 3   | WHSC1        |
| chr5:72861807-72887222    | 16  | TNPO1        |
| chr1:155709772-155729366  | 3   | DAP3         |
| chr14:101983018-101983609 | 5   | DYNC1H1      |
| chr2:190900563-190923983  | 19  | GLS          |
| chr3:132688649-132694965  | 10  | NPHP3-ACAD11 |
| chr2:112059976-112067067  | 12  | TMEM87B      |

|                           |     |          |
|---------------------------|-----|----------|
| chr11:674535-691598       | 14  | DEAF1    |
| chr20:3026686-3027841     | 12  | PTPRA    |
| chr17:82763964-82783714   | 29  | TBCD     |
| chr15:85064369-85083644   | 14  | PDE8A    |
| chr10:35137781-35179276   | 3   | CREM     |
| chr7:23317638-23361741    | 2   | IGF2BP3  |
| chr8:6455142-6480876      | 12  | MCPH1    |
| chr18:21765771-21799974   | 26  | MIB1     |
| chr4:139336847-139344339  | 7   | NAA15    |
| chr2:63571374-63571626    | 59  | no gene  |
| chr6:17665238-17669546    | 96  | NUP153   |
| chr11:74342460-74343416   | 3   | PGM2L1   |
| chr7:67295617-67297303    | 19  | PMS2P4   |
| chr8:103885297-103886223  | 118 | RIMS2    |
| chr17:54930072-54939020   | 11  | TOM1L1   |
| chr4:4306137-4315970      | 25  | ZBTB49   |
| chr13:42159265-42160136   | 33  | DGKH     |
| chr6:84556018-84567813    | 4   | no gene  |
| chr1:41113282-41161432    | 25  | SCMH1    |
| chr11:119273867-119278713 | 13  | CBL      |
| chr6:47503279-47504054    | 21  | CD2AP    |
| chr7:107527236-107558115  | 18  | COG5     |
| chr3:71041327-71047095    | 21  | FOXP1    |
| chrX:102713781-102721091  | 6   | GPRASP2  |
| chr5:32255692-32276742    | 5   | MTMR12   |
| chr7:38010920-38013581    | 14  | no gene  |
| chr2:45840379-45843063    | 6   | PRKCE    |
| chr6:42066311-42077239    | 9   | TAF8     |
| chr16:50068779-50079018   | 7   | HEATR3   |
| chr1:233346441-233362293  | 95  | KIAA1804 |
| chr6:136669282-136698751  | 10  | MAP3K5   |
| chr19:3425105-3449139     | 17  | NFIC     |
| chrX:119931935-119936682  | 11  | NKAP     |
| chr5:33023074-33023327    | 7   | no gene  |
| chr10:100380982-100381448 | 10  | OLMALINC |
| chr11:20407910-20426865   | 10  | PRMT3    |
| chr8:127795893-127890998  | 12  | PVT1     |
| chr10:125812213-125816525 | 6   | UROS     |
| chr2:27615167-27617571    | 17  | ZNF512   |
| chr8:39136656-39151548    | 4   | ADAM32   |
| chr2:175117989-175136486  | 26  | ATF2     |
| chr3:48180720-48184695    | 4   | CDC25A   |
| chr3:32764454-32769962    | 14  | CNOT10   |

|                           |     |          |
|---------------------------|-----|----------|
| chr2:55643157-55644720    | 45  | PNPT1    |
| chr2:101054107-101059539  | 14  | TBC1D8   |
| chr9:100320264-100349372  | 41  | TEX10    |
| chr2:199940088-199948472  | 4   | TYW5     |
| chr21:33581301-33586181   | 7   | DONSON   |
| chr1:9935491-9936627      | 4   | LZIC     |
| chr11:59608483-59610589   | 11  | OSBP     |
| chr6:7885960-7904723      | 4   | TXNDC5   |
| chr16:16033108-16056295   | 15  | ABCC1    |
| chr1:197583151-197715074  | 12  | DENND1B  |
| chr8:120453846-120470937  | 16  | MTBP     |
| chr15:64112572-64118854   | 25  | SNX1     |
| chr1:155408137-155415923  | 7   | ASH1L    |
| chr16:22248754-22251322   | 89  | EEF2K    |
| chr3:100339086-100341161  | 7   | NIT2     |
| chr11:45913818-45916303   | 11  | PEX16    |
| chr3:72824423-72844423    | 26  | SHQ1     |
| chr7:21477078-21482123    | 55  | SP4      |
| chr6:158429735-158461729  | 13  | TULP4    |
| chr6:34646600-34646798    | 10  | C6orf106 |
| chr4:2625261-2646832      | 13  | FAM193A  |
| chr2:239990073-240011696  | 95  | NDUFA10  |
| chr18:2775733-2784621     | 7   | SMCHD1   |
| chr9:100310298-100330169  | 5   | TEX10    |
| chr15:49235850-49308777   | 39  | GALK2    |
| chr2:239990073-240014860  | 247 | NDUFA10  |
| chr5:25180728-25191033    | 5   | nogene   |
| chr9:35231119-35259050    | 14  | UNC13B   |
| chr9:96827079-96853069    | 5   | ZNF782   |
| chr4:87089983-87094969    | 12  | AFF1     |
| chr1:155354472-155357749  | 12  | ASH1L    |
| chr21:36237261-36239955   | 6   | DOPEY2   |
| chr6:125993756-126008472  | 12  | TRMT11   |
| chr16:3810602-3851009     | 6   | CREBBP   |
| chr4:13336892-13342312    | 5   | nogene   |
| chr10:35501500-35530243   | 52  | CCNY     |
| chr20:34412514-34413879   | 13  | ITCH     |
| chr14:31306731-31308020   | 21  | HEATR5A  |
| chr10:74240927-74243033   | 6   | nogene   |
| chr3:179752284-179765848  | 4   | USP13    |
| chr5:163512001-163517674  | 12  | MAT2B    |
| chr15:100885266-100898185 | 11  | ALDH1A3  |
| chr19:49497193-49498046   | 151 | RPS11    |

|                           |     |          |
|---------------------------|-----|----------|
| chr13:29522316-29536202   | 167 | SLC7A1   |
| chr9:96458378-96465778    | 32  | HABP4    |
| chr19:5039835-5082504     | 9   | KDM4B    |
| chr1:84179176-84202805    | 18  | PRKACB   |
| chr8:127882061-127890998  | 33  | PVT1     |
| chr20:56474677-56477124   | 11  | RTFDC1   |
| chr2:32392038-32406557    | 2   | BIRC6    |
| chr12:77998336-78021862   | 2   | NAV3     |
| chr16:31473681-31473977   | 2   | TGFB1I1  |
| chr2:161367477-161371322  | 25  | PSMD14   |
| chr18:9182381-9221999     | 183 | ANKRD12  |
| chr15:41243666-41262883   | 5   | CHP1     |
| chrX:131777622-131794466  | 12  | FIRRE    |
| chr14:73892026-73896534   | 20  | ZNF410   |
| chr1:113724758-113758733  | 32  | PHTF1    |
| chr10:74242737-74314745   | 52  | ADK      |
| chrX:80733455-80736088    | 99  | BRWD3    |
| chr3:197075836-197119530  | 30  | DLG1     |
| chr6:43600987-43605319    | 12  | POLH     |
| chr12:55800561-55803728   | 9   | SARNP    |
| chr15:42651015-42663917   | 18  | STARD9   |
| chr1:205268949-205269884  | 26  | TMCC2    |
| chr15:51887588-51893945   | 11  | TMOD3    |
| chr5:122799691-122803613  | 10  | SNX2     |
| chr8:47279861-47599196    | 16  | SPIDR    |
| chr7:130039463-130049144  | 122 | ZC3HC1   |
| chr6:43524470-43526747    | 24  | XPO5     |
| chr4:25151959-25159107    | 144 | SEPSECS  |
| chr11:74859157-74863021   | 6   | XRRA1    |
| chr3:72781304-72793036    | 23  | SHQ1     |
| chr8:140585118-140585311  | 53  | AGO2     |
| chr4:42543916-42556040    | 2   | ATP8A1   |
| chr6:16485971-16753347    | 10  | ATXN1    |
| chr22:17688985-17696210   | 13  | BCL2L13  |
| chr5:71545038-71549606    | 12  | BDP1     |
| chr15:36644277-36657905   | 63  | C15orf41 |
| chr5:179840871-179853437  | 11  | C5orf45  |
| chr13:114242120-114247004 | 16  | CDC16    |
| chr17:17261599-17264981   | 13  | COPS3    |
| chr11:108070095-108073497 | 6   | CUL5     |
| chr11:118754704-118758902 | 16  | DDX6     |
| chr22:37874369-37878171   | 2   | EIF3L    |
| chr4:38905521-38915073    | 2   | FAM114A1 |

|                           |     |              |
|---------------------------|-----|--------------|
| chr18:41516419-41525526   | 16  | KC6          |
| chr4:99041042-99045310    | 16  | METAP1       |
| chr18:21798083-21804014   | 10  | MIB1         |
| chr3:9662266-9671170      | 17  | MTMR14       |
| chr3:47897357-47897743    | 2   | nogene       |
| chr9:106009281-106019200  | 2   | nogene       |
| chr12:57395748-57398198   | 17  | nogene       |
| chr19:52588531-52592228   | 82  | nogene       |
| chr8:32595827-32616885    | 29  | NRG1         |
| chr10:49932099-49934163   | 6   | PARG         |
| chr1:233177801-233208610  | 29  | PCNXL2       |
| chr11:14789105-14819209   | 7   | PDE3B        |
| chr8:140890542-140925749  | 20  | PTK2         |
| chr1:40189054-40195764    | 48  | RLF          |
| chr16:57204503-57231319   | 2   | RSPRY1       |
| chr1:232513856-232515608  | 5   | SIPA1L2      |
| chr10:68487143-68488629   | 6   | SLC25A16     |
| chr14:102376649-102465289 | 2   | TECPR2       |
| chr4:84774819-84794979    | 2   | WDFY3        |
| chr4:182891348-182915575  | 214 | DCTD         |
| chr19:32899856-32918339   | 4   | CEP89        |
| chr14:103673013-103673431 | 13  | KLC1         |
| chr3:101816794-101821750  | 37  | NXPE3        |
| chr17:4066446-4072756     | 94  | ZZEF1        |
| chr9:94923985-94967801    | 12  | C9orf3       |
| chr9:137790847-137818138  | 21  | EHMT1        |
| chr16:89589896-89591260   | 11  | CPNE7        |
| chr7:133317283-133356573  | 20  | EXOC4        |
| chr7:22571774-22572013    | 5   | LOC100506178 |
| chr5:116399481-116412760  | 15  | nogene       |
| chr15:22976427-22976961   | 31  | nogene       |
| chr6:135300499-135323324  | 46  | AHI1         |
| chr10:121898840-121913893 | 17  | ATE1         |
| chr4:77055961-77066405    | 76  | CCNI         |
| chrX:338603-361590        | 42  | PPP2R3B      |
| chr1:39340501-39340953    | 16  | nogene       |
| chr1:197607072-197658369  | 5   | DENND1B      |
| chr1:51440346-51448135    | 50  | EPS15        |
| chr7:65979398-65980409    | 80  | GUSB         |
| chr10:103314185-103345132 | 2   | PCGF6        |
| chr18:42043732-42067513   | 3   | PIK3C3       |
| chr5:78089392-78165672    | 182 | AP3B1        |
| chr17:17261965-17264981   | 21  | COPS3        |

|                           |    |            |
|---------------------------|----|------------|
| chr10:408925-415888       | 6  | DIP2C      |
| chr3:44780884-44800437    | 3  | KIF15      |
| chr6:116692054-116726622  | 92 | KPNA5      |
| chr2:37974039-37975314    | 10 | RMDN2      |
| chr4:176727777-176740765  | 39 | VEGFC      |
| chr9:146101-164037        | 37 | CBWD1      |
| chr5:40746797-40777586    | 3  | TTC33      |
| chr1:15534236-15536814    | 89 | DNAJC16    |
| chr4:15625251-15644657    | 11 | FBXL5      |
| chr14:30628208-30638247   | 24 | SCFD1      |
| chr2:222613810-222634541  | 10 | FARSB      |
| chr5:157359004-157361598  | 53 | CYFIP2     |
| chr7:105470687-105495253  | 9  | PUS7       |
| chr3:196722414-196731092  | 15 | PIGX       |
| chr18:31846715-31849739   | 15 | TRAPPC8    |
| chr22:46098010-46098469   | 3  | MIRLET7BHG |
| chr6:104795578-104843298  | 2  | HACE1      |
| chr2:174078967-174082064  | 14 | OLA1       |
| chr4:108655563-108657647  | 18 | OSTC       |
| chr14:70962225-71013202   | 2  | PCNX       |
| chr10:27169943-27181581   | 9  | MASTL      |
| chr17:36986616-37021014   | 30 | AATF       |
| chr9:85692688-85712566    | 20 | AGTPBP1    |
| chr3:138274448-138290639  | 4  | ARMC8      |
| chr11:74113779-74139828   | 4  | C2CD3      |
| chr12:48833276-48834497   | 42 | DDX23      |
| chr1:97450058-97515941    | 3  | DPYD       |
| chr11:32587011-32589641   | 25 | EIF3M      |
| chr2:241403827-241431774  | 3  | FARP2      |
| chr3:33065462-33072713    | 46 | GLB1       |
| chr3:37075023-37096660    | 31 | LRRFIP2    |
| chr5:34163117-34182867    | 24 | nogene     |
| chr5:171213618-171265847  | 4  | RANBP17    |
| chr18:47845339-47896809   | 7  | SMAD2      |
| chr18:12506476-12535601   | 43 | SPIRE1     |
| chr12:103976917-103980962 | 20 | TDG        |
| chr16:69361403-69368482   | 12 | TERF2      |
| chr1:151888272-151889373  | 14 | THEM4      |
| chr16:88627919-88628854   | 4  | ZC3H18     |
| chr14:100084686-100097658 | 26 | EVL        |
| chr22:25661575-25695214   | 5  | ADRBK2     |
| chr5:148394713-148425701  | 17 | FBXO38     |
| chr12:25225613-25245395   | 11 | KRAS       |



|                           |     |          |
|---------------------------|-----|----------|
| chr7:2720603-2721550      | 4   | nogene   |
| chr14:73355625-73410068   | 18  | NUMB     |
| chr17:62573214-62586226   | 8   | TLK2     |
| chr4:147906637-147966839  | 2   | ARHGAP10 |
| chr4:51874270-51891851    | 19  | DCUN1D4  |
| chr2:206445306-206481308  | 19  | ADAM23   |
| chr2:27213176-27216620    | 10  | ATRAID   |
| chr14:92093251-92096838   | 19  | ATXN3    |
| chr1:154212319-154213946  | 5   | C1orf43  |
| chr18:13037236-13040956   | 52  | CEP192   |
| chr12:119832770-119850275 | 10  | CIT      |
| chr4:1225359-1238337      | 32  | CTBP1    |
| chr5:137948954-137949184  | 20  | FAM13B   |
| chr2:222630112-222634541  | 18  | FARSB    |
| chr5:108883395-109047198  | 2   | FER      |
| chr19:19465344-19465614   | 10  | GATAD2A  |
| chr2:196271192-196308085  | 16  | HECW2    |
| chr1:23030468-23050520    | 24  | KDM1A    |
| chr18:21778102-21779685   | 109 | MIB1     |
| chr6:97254556-97269992    | 12  | MMS22L   |
| chr17:31155982-31206371   | 24  | NF1      |
| chr19:16635806-16636479   | 14  | nogene   |
| chr17:78392475-78398351   | 3   | PGS1     |
| chr7:151484736-151498180  | 56  | RHEB     |
| chr10:75150513-75168658   | 81  | SAMD8    |
| chr2:127989563-127996491  | 29  | SAP130   |
| chr10:7220410-7276989     | 10  | SFMBT2   |
| chr7:17868406-17875790    | 667 | SNX13    |
| chr17:20245925-20306082   | 27  | SPECC1   |
| chr2:45413113-45419894    | 21  | SRBD1    |
| chr9:112098469-112112868  | 3   | SUSD1    |
| chr4:6996324-7004924      | 21  | TBC1D14  |
| chr15:43428015-43441583   | 7   | TP53BP1  |
| chr15:42872610-42878684   | 93  | TTBK2    |
| chr9:15210087-15226012    | 14  | TTC39B   |
| chr13:27089882-27116596   | 41  | USP12    |
| chr15:50432337-50439177   | 11  | USP8     |
| chr6:142166227-142189534  | 35  | VTA1     |
| chr1:247308474-247310456  | 87  | ZNF496   |
| chr5:157518822-157530883  | 14  | ADAM19   |
| chr8:6730710-6732650      | 14  | AGPAT5   |
| chr11:46547112-46548500   | 5   | AMBRA1   |
| chr10:87784469-87792755   | 11  | ATAD1    |

|                           |     |          |
|---------------------------|-----|----------|
| chr7:16681300-16697061    | 21  | BZW2     |
| chr3:33606590-33663515    | 4   | CLASP2   |
| chr22:19963565-19964299   | 13  | COMT     |
| chr12:56282419-56283857   | 6   | CS       |
| chr12:116964696-116988869 | 48  | FBXW8    |
| chr3:10226370-10239039    | 4   | IRAK2    |
| chr1:32163234-32167296    | 33  | KPNA6    |
| chrX:150736594-150737448  | 128 | MTMR1    |
| chr4:17814852-17818088    | 20  | NCAPG    |
| chr12:55789074-55796076   | 19  | SARNP    |
| chr3:27383152-27391808    | 10  | SLC4A7   |
| chr18:2722518-2729409     | 2   | SMCHD1   |
| chr1:31269157-31292006    | 7   | SNRNP40  |
| chr15:44595258-44596943   | 11  | SPG11    |
| chr9:109050282-109060452  | 14  | TMEM245  |
| chr10:80507227-80509471   | 11  | TSPAN14  |
| chr1:32187953-32190249    | 31  | TXLNA    |
| chr11:75861745-75912039   | 3   | UVRAG    |
| chr10:1072115-1078003     | 20  | WDR37    |
| chr3:48450036-48454418    | 5   | ATRIP    |
| chr10:73718014-73722577   | 4   | BMS1P4   |
| chr21:41901621-41909523   | 8   | C2CD2    |
| chr3:138505294-138529462  | 4   | CEP70    |
| chr2:47822217-47823360    | 191 | FBXO11   |
| chr17:62010549-62063301   | 4   | MED13    |
| chr16:47086225-47132025   | 15  | NETO2    |
| chr1:169287302-169324500  | 5   | NME7     |
| chr10:103178796-103179036 | 7   | nogene   |
| chr8:94934036-94934467    | 7   | nogene   |
| chr18:56096074-56097195   | 4   | nogene   |
| chr4:76130655-76144473    | 45  | NUP54    |
| chr1:202431479-202449171  | 7   | PPP1R12B |
| chr2:53899880-53901559    | 9   | PSME4    |
| chr5:128131066-128161800  | 32  | SLC12A2  |
| chr17:64591083-64598490   | 28  | SMURF2   |
| chr12:53381658-53411435   | 26  | SP1      |
| chr15:42634855-42638812   | 40  | STARD9   |
| chr13:52657531-52659249   | 11  | SUGT1    |
| chr15:23008698-23010133   | 25  | TUBGCP5  |
| chr17:2635382-2638320     | 6   | PAFAH1B1 |
| chr8:140664916-140674404  | 84  | PTK2     |
| chr17:18340042-18340813   | 14  | SHMT1    |
| chr15:76225848-76295737   | 16  | ETFA     |

|                           |     |          |
|---------------------------|-----|----------|
| chr20:21339043-21346550   | 19  | XRN2     |
| chr10:74394140-74525426   | 2   | ADK      |
| chr11:72110087-72111496   | 11  | ANAPC15  |
| chr8:102839649-102843747  | 10  | AZIN1    |
| chr14:34826012-34862322   | 48  | BAZ1A    |
| chr2:73239642-73244715    | 13  | CCT7     |
| chr15:73702771-73703997   | 638 | CD276    |
| chr22:46384542-46389499   | 108 | CELSR1   |
| chr12:38760846-38776301   | 48  | CPNE8    |
| chr2:171468887-171469456  | 26  | DCAF17   |
| chr11:44107682-44130138   | 79  | EXT2     |
| chr1:93894613-93897898    | 125 | GCLM     |
| chr14:31156839-31157303   | 14  | HECTD1   |
| chr5:138372673-138377825  | 12  | KDM3B    |
| chr18:62221036-62232427   | 13  | KIAA1468 |
| chr18:8714138-8720496     | 228 | MTCL1    |
| chr21:21280577-21374013   | 2   | NCAM2    |
| chr12:68715626-68727389   | 14  | NUP107   |
| chr5:41749526-41805681    | 12  | OXCT1    |
| chr12:53454749-53471807   | 4   | PCBP2    |
| chr17:45450617-45454272   | 2   | PLEKHM1  |
| chr3:158122102-158225733  | 6   | RSRC1    |
| chr6:107901369-107924932  | 52  | SEC63    |
| chr14:30902535-30911162   | 97  | STRN3    |
| chr17:82763964-82870380   | 12  | TBCD     |
| chr17:998778-999584       | 20  | TIMM22   |
| chr2:32630522-32678922    | 34  | TTC27    |
| chr21:32378444-32385684   | 14  | URB1     |
| chr6:144521979-144523188  | 43  | UTRN     |
| chr1:52477707-52481923    | 24  | ZCCHC11  |
| chr3:185687056-185698347  | 10  | IGF2BP2  |
| chrX:21868466-21869678    | 4   | MBTPS2   |
| chr17:60347657-60347842   | 29  | nogene   |
| chr14:58318541-58330169   | 42  | ARID4A   |
| chr8:140846259-140925749  | 145 | PTK2     |
| chr12:82430892-82456820   | 19  | METTL25  |
| chr9:31942990-31973112    | 19  | nogene   |
| chr9:83659779-83686155    | 77  | UBQLN1   |
| chr20:1452492-1455132     | 17  | NSFL1C   |
| chr18:36681435-36693423   | 65  | FHOD3    |
| chr8:42398711-42403461    | 31  | VDAC3    |
| chr6:156829226-156829421  | 18  | ARID1B   |
| chr11:107454449-107455776 | 10  | CWF19L2  |

|                           |     |                  |
|---------------------------|-----|------------------|
| chr12:124964393-124965812 | 13  | DHX37            |
| chr6:89793761-89803554    | 10  | MDN1             |
| chr11:61436760-61438113   | 17  | SDHAF2           |
| chr15:44567423-44569505   | 10  | SPG11            |
| chr8:67266005-67277457    | 8   | ARFGEF1          |
| chr9:96533926-96541892    | 3   | CDC14B           |
| chr21:36362182-36369876   | 6   | MORC3            |
| chr21:46381693-46391376   | 12  | PCNT             |
| chr10:122392302-122400388 | 10  | PLEKHA1          |
| chr12:19253939-19261021   | 75  | PLEKHA5          |
| chr18:9775277-9815222     | 40  | RAB31            |
| chr17:15612700-15614033   | 11  | CDRT1            |
| chr2:171448680-171476950  | 29  | DCAF17           |
| chr16:67120111-67132525   | 2   | C16orf70         |
| chr14:61995875-61996542   | 3   | SYT16            |
| chr3:112109542-112113145  | 9   | C3orf52          |
| chr15:50912077-50930971   | 16  | AP4E1            |
| chr16:11894953-11896782   | 3   | GSPT1            |
| chr2:9509978-9543285      | 28  | ADAM17           |
| chr18:12356693-12358943   | 10  | AFG3L2           |
| chr12:132005076-132006877 | 35  | EP400            |
| chr1:212872677-212895354  | 10  | FLVCR1           |
| chr12:68820324-68828931   | 11  | MDM2             |
| chr11:19976746-19984247   | 13  | NAV2             |
| chr20:31545951-31546495   | 29  | nogene           |
| chr5:37325900-37328420    | 84  | NUP155           |
| chr1:233208517-233218184  | 12  | PCNXL2           |
| chr8:98706466-98722969    | 89  | STK3             |
| chr12:130812956-130827267 | 6   | STX2             |
| chr11:43448001-43451265   | 17  | TTC17            |
| chr3:179681877-179707076  | 28  | USP13            |
| chr4:176727777-176731524  | 16  | VEGFC            |
| chr8:99384207-99442635    | 19  | VPS13B           |
| chr17:68444492-68452992   | 28  | WIPI1            |
| chr1:78013050-78013619    | 4   | DNAJB4           |
| chrX:53614533-53615835    | 226 | HUWE1            |
| chr11:29381072-29384112   | 26  | nogene           |
| chr10:87894024-87895777   | 5   | PTEN             |
| chr3:196323743-196327591  | 40  | TM4SF19-TCTEX1D2 |
| chr13:111280350-111280505 | 4   | ARHGEF7          |
| chr11:65920342-65920662   | 4   | DRAP1            |
| chr11:20402918-20426865   | 35  | PRMT3            |
| chr1:174272413-174394145  | 69  | RABGAP1L         |

|                          |     |          |
|--------------------------|-----|----------|
| chr3:47046486-47067118   | 42  | SETD2    |
| chr4:20704465-20713539   | 6   | PACRGL   |
| chr3:27448650-27458991   | 5   | SLC4A7   |
| chr1:75728400-75734871   | 2   | ACADM    |
| chr22:25663629-25687667  | 2   | ADRBK2   |
| chr1:225085709-225097239 | 12  | DNAH14   |
| chr6:136637324-136642569 | 2   | MAP3K5   |
| chrX:115629197-115640503 | 10  | PLS3     |
| chr2:3338016-3356363     | 5   | TSSC1    |
| chr16:89305205-89317078  | 29  | ANKRD11  |
| chr4:17804403-17805225   | 3   | DCAF16   |
| chr8:73673106-73709162   | 131 | STAU2    |
| chr18:46815311-46829867  | 4   | PIAS2    |
| chr2:190927305-190954818 | 6   | GLS      |
| chr3:155897926-155911279 | 13  | GMPS     |
| chr2:66464108-66512294   | 4   | MEIS1    |
| chr7:66770322-66775393   | 13  | RABGEF1  |
| chr4:4315635-4315970     | 23  | ZBTB49   |
| chr4:145152540-145155996 | 7   | OTUD4    |
| chr13:20731840-20737805  | 35  | N6AMT2   |
| chrX:119410281-119426354 | 4   | nogene   |
| chr11:31452717-31463305  | 107 | IMMP1L   |
| chr19:11178344-11178720  | 87  | KANK2    |
| chr2:235744697-235750488 | 140 | AGAP1    |
| chr3:195971322-195979866 | 11  | SDHAP1   |
| chr15:50458999-50462322  | 24  | USP8     |
| chr12:28225794-28259442  | 188 | CCDC91   |
| chr7:139237004-139266403 | 17  | UBN2     |
| chr9:94292340-94293069   | 17  | ZNF169   |
| chr18:9583116-9595238    | 18  | PPP4R1   |
| chr10:49827401-49832908  | 23  | PARG     |
| chr19:39417554-39419003  | 21  | PLEKHG2  |
| chr7:105168007-105169265 | 20  | SRPK2    |
| chr17:4189381-4209947    | 4   | ANKFY1   |
| chr16:21315883-21317126  | 8   | CRYM-AS1 |
| chr5:75685206-75692500   | 33  | POC5     |
| chr4:70762518-70768661   | 77  | RUFY3    |
| chr19:9652952-9660874    | 101 | ZNF562   |
| chr8:130214555-130361771 | 11  | ASAP1    |
| chr1:6549570-6550615     | 9   | NOL9     |
| chr15:78289618-78290556  | 14  | WDR61    |
| chr15:62020478-62044255  | 63  | VPS13C   |
| chr12:333486-334422      | 10  | KDM5A    |

|                           |     |          |
|---------------------------|-----|----------|
| chr18:57731626-57761939   | 3   | ATP8B1   |
| chr2:186501272-186502587  | 11  | ZC3H15   |
| chr12:122216487-122218397 | 24  | DIABLO   |
| chr12:112060269-112061388 | 13  | NAA25    |
| chr13:95970111-95996135   | 57  | UGGT2    |
| chr3:15720914-15751820    | 16  | ANKRD28  |
| chr12:51073788-51074082   | 8   | CSRNP2   |
| chr1:198262574-198297240  | 4   | NEK7     |
| chr1:235612123-235612506  | 141 | nogene   |
| chrX:65075473-65107023    | 212 | nogene   |
| chr3:183717650-183728851  | 53  | YEATS2   |
| chr15:65178933-65180204   | 259 | CLPX     |
| chr22:28703504-28734727   | 23  | CHEK2    |
| chr4:17961902-17963049    | 14  | LCORL    |
| chr8:47800792-47807326    | 16  | PRKDC    |
| chr7:47396799-47400914    | 18  | TNS3     |
| chr2:42256500-42264731    | 15  | EML4     |
| chr1:117442230-117502970  | 6   | MAN1A2   |
| chr17:47826636-47828670   | 6   | MRPL10   |
| chr2:155809927-155811890  | 5   | nogene   |
| chr6:120978891-121016795  | 4   | nogene   |
| chr1:32224033-32224475    | 15  | EIF3I    |
| chr6:70699274-70732511    | 16  | SMAP1    |
| chr6:87677817-87681763    | 17  | AKIRIN2  |
| chr12:99772921-99806700   | 17  | ANKS1B   |
| chr22:28699837-28725367   | 50  | CHEK2    |
| chr9:132612086-132632091  | 16  | DDX31    |
| chr1:197672036-197674169  | 14  | DENND1B  |
| chr6:167022408-167033971  | 172 | FGFR1OP  |
| chr3:197756425-197763638  | 37  | FYTTD1   |
| chr1:155813633-155814449  | 12  | GON4L    |
| chr21:34102834-34125480   | 305 | MRPS6    |
| chr11:34070937-34071336   | 4   | nogene   |
| chr5:34048649-34049185    | 20  | nogene   |
| chr13:24441845-24455212   | 28  | PARP4    |
| chr22:35809779-35938897   | 13  | RBFOX2   |
| chr4:76995780-76996539    | 15  | 11-Sep   |
| chr2:161179613-161204793  | 92  | TANK     |
| chr18:24080584-24083081   | 62  | TTC39C   |
| chr9:33944364-33953474    | 8   | UBAP2    |
| chr10:87784469-87814612   | 33  | ATAD1    |
| chr17:3026007-3032449     | 15  | RAP1GAP2 |
| chr2:119236469-119237165  | 27  | nogene   |

|                           |    |          |
|---------------------------|----|----------|
| chr6:3410187-3438555      | 10 | SLC22A23 |
| chr21:37087246-37096643   | 11 | TTC3     |
| chrX:16818573-16818877    | 7  | TXLNG    |
| chr6:135039572-135042118  | 5  | HBS1L    |
| chr2:58123100-58135199    | 2  | VRK2     |
| chr1:244411286-244424387  | 6  | ADSS     |
| chr11:68574108-68583129   | 4  | PPP6R3   |
| chr7:17873527-17875790    | 46 | SNX13    |
| chr12:77940318-77968702   | 84 | NAV3     |
| chr19:15368234-15377014   | 3  | AKAP8    |
| chr18:58514992-58529238   | 4  | ALPK2    |
| chr15:50948019-50950169   | 7  | AP4E1    |
| chr1:35743140-35746992    | 24 | CLSPN    |
| chr9:123652012-123879021  | 8  | DENND1A  |
| chr14:66916002-66924292   | 15 | GPHN     |
| chr14:49709158-49725769   | 8  | KLHDC1   |
| chr7:1957628-2069338      | 5  | MAD1L1   |
| chr6:136694139-136697387  | 21 | MAP3K5   |
| chr5:34175444-34179097    | 43 | nogene   |
| chr8:106679209-106692877  | 43 | OXR1     |
| chr10:34331116-34341816   | 5  | PARD3    |
| chr7:103353920-103355793  | 3  | PSMC2    |
| chr1:8495062-8508675      | 12 | RERE     |
| chr7:96277195-96309691    | 79 | SLC25A13 |
| chr12:53406584-53409561   | 18 | SP1      |
| chr18:58709377-58723251   | 4  | MALT1    |
| chr20:49646964-49656702   | 3  | B4GALT5  |
| chr9:120771347-120778545  | 11 | FBXW2    |
| chr17:31258343-31265339   | 78 | NF1      |
| chr22:30243739-30246797   | 30 | nogene   |
| chr7:105146492-105203785  | 17 | SRPK2    |
| chr13:113510237-113534240 | 6  | TMCO3    |
| chr12:350620-354234       | 59 | KDM5A    |
| chr7:98967040-98971945    | 9  | TRRAP    |
| chr17:66123264-66132763   | 4  | CEP112   |
| chr16:50786854-50793664   | 51 | CYLD     |
| chr1:44284834-44352925    | 4  | ERI3     |
| chr13:21161789-21172681   | 11 | SKA3     |
| chr3:11807832-11809682    | 5  | TAMM41   |
| chr5:65260599-65300131    | 59 | ADAMTS6  |
| chr4:121677893-121686372  | 3  | ANXA5    |
| chr11:34082824-34089456   | 9  | CAPRIN1  |
| chr6:7181123-7189322      | 94 | RREB1    |

|                           |     |              |
|---------------------------|-----|--------------|
| chr20:4883641-4899712     | 27  | SLC23A2      |
| chr14:73953434-73955928   | 13  | COQ6         |
| chr7:66130743-66145500    | 42  | CRCP         |
| chr7:6434761-6436533      | 15  | DAGLB        |
| chr10:93670769-93687449   | 6   | FRA10AC1     |
| chr12:112258495-112259265 | 3   | HECTD4       |
| chr20:26018831-26019202   | 13  | LOC100134868 |
| chr2:42656199-42682589    | 2   | MTA3         |
| chr22:46978546-46978934   | 3   | nogene       |
| chr13:78635109-78644997   | 32  | RNF219       |
| chr7:17875479-17875790    | 89  | SNX13        |
| chr9:112078537-112102285  | 35  | SUSD1        |
| chr17:82756164-82814934   | 29  | TBCD         |
| chr5:88220589-88240916    | 3   | TMEM161B     |
| chr1:154172907-154173201  | 116 | TPM3         |
| chr3:33411580-33425741    | 108 | UBP1         |
| chr3:49286097-49286325    | 6   | USP4         |
| chr8:99274197-99328914    | 20  | VPS13B       |
| chr2:174581309-174585611  | 10  | WIPF1        |
| chr13:59911734-59924870   | 13  | DIAPH3       |
| chr9:97139852-97144740    | 130 | nogene       |
| chr2:200439121-200440784  | 59  | SPATS2L      |
| chr10:91830922-91836998   | 3   | TNKS2        |
| chr20:23389945-23403072   | 174 | NAPB         |
| chr7:157382248-157385611  | 4   | DNAJB6       |
| chr5:178222354-178225429  | 15  | PHYKPL       |
| chr1:27841013-27843330    | 25  | PPP1R8       |
| chr3:179740246-179745217  | 16  | USP13        |
| chr14:77451186-77454102   | 3   | VIPAS39      |
| chr11:130109428-130110661 | 391 | APLP2        |
| chr18:79126266-79307234   | 13  | ATP9B        |
| chr12:111658735-111679340 | 30  | BRAP         |
| chr5:37238856-37247745    | 64  | C5orf42      |
| chr1:155269487-155270977  | 16  | CLK2         |
| chr19:54142928-54146657   | 11  | CNOT3        |
| chr1:197617658-197715074  | 12  | DENND1B      |
| chr1:184732836-184749592  | 33  | EDEM3        |
| chr15:82214716-82230971   | 5   | EFTUD1       |
| chr12:11869423-11869969   | 83  | ETV6         |
| chr6:629834-637861        | 309 | EXOC2        |
| chr5:453369-454051        | 16  | EXOC3        |
| chr1:1804418-1815862      | 4   | GNB1         |
| chrX:70374150-70387297    | 2   | KIF4A        |



|                           |      |              |
|---------------------------|------|--------------|
| chr1:93339356-93340510    | 7    | LOC100131564 |
| chr12:112068879-112074764 | 15   | NAA25        |
| chr2:190659157-190673152  | 2000 | NAB1         |
| chr4:119412351-119420155  | 15   | nogene       |
| chr12:108545888-108546309 | 10   | nogene       |
| chr2:95833905-95834224    | 18   | nogene       |
| chrX:85091377-85091770    | 12   | nogene       |
| chr2:10644319-10671690    | 24   | NOL10        |
| chr17:46692902-46713986   | 5    | NSF          |
| chr10:103139405-103174982 | 13   | NT5C2        |
| chr12:89459637-89467685   | 42   | POC1B        |
| chr2:108771700-108773046  | 231  | RANBP2       |
| chr1:185087551-185093276  | 63   | RNF2         |
| chr10:119902798-119909130 | 2    | SEC23IP      |
| chr11:17988596-17995909   | 18   | SERGEF       |
| chr1:100906851-100921841  | 188  | SLC30A7      |
| chr13:60439687-60467379   | 301  | TDRD3        |
| chr13:113520615-113539507 | 16   | TMCO3        |
| chr8:140283888-140287734  | 15   | TRAPPC9      |
| chr18:76875491-76881512   | 3    | ZNF236       |
| chr2:173364794-173367831  | 43   | CDCA7        |
| chr11:34089394-34092056   | 21   | CAPRIN1      |
| chr1:117414712-117466427  | 26   | MAN1A2       |
| chr19:50795740-50797396   | 12   | nogene       |
| chr12:95031348-95057878   | 7    | NR2C1        |
| chr11:73359833-73361161   | 14   | ARHGEF17     |
| chr4:39913610-39925933    | 558  | PDS5A        |
| chr4:40890363-40935139    | 89   | APBB2        |
| chr3:5170502-5172740      | 9    | ARL8B        |
| chr1:161802051-161821161  | 15   | ATF6         |
| chr19:41230966-41231298   | 36   | AXL          |
| chr15:73699585-73704472   | 23   | CD276        |
| chr3:98876666-98881767    | 6    | DCBLD2       |
| chr8:119838258-119850516  | 26   | DSCC1        |
| chr16:68025414-68056424   | 7    | DUS2         |
| chr16:23529501-23529897   | 19   | EARS2        |
| chr3:172773902-172786574  | 28   | ECT2         |
| chr4:2657802-2683115      | 3    | FAM193A      |
| chr2:232747614-232756334  | 18   | GIGYF2       |
| chr1:45630481-45640403    | 12   | GPBP1L1      |
| chr7:152235816-152238826  | 23   | KMT2C        |
| chr2:15461200-15461791    | 3    | NBAS         |
| chr6:107038005-107038768  | 12   | nogene       |

|                           |     |              |
|---------------------------|-----|--------------|
| chr17:58001488-58005041   | 5   | nogene       |
| chr12:9564159-9571573     | 11  | nogene       |
| chr1:36170963-36173480    | 12  | nogene       |
| chr22:50410558-50411377   | 7   | nogene       |
| chr3:121439991-121468431  | 14  | POLQ         |
| chr14:94256459-94259369   | 33  | PPP4R4       |
| chr2:160300650-160318227  | 19  | RBMS1        |
| chr11:74789625-74810330   | 108 | RNF169       |
| chr15:41529469-41529979   | 12  | RPAP1        |
| chr3:47435007-47466447    | 28  | SCAP         |
| chr7:12214808-12218521    | 28  | TMEM106B     |
| chr19:34430575-34434968   | 793 | UBA2         |
| chr3:124735092-124744203  | 17  | UMPS         |
| chr8:17284472-17286427    | 10  | VPS37A       |
| chr13:26573714-26613058   | 68  | WASF3        |
| chr16:57164000-57173869   | 675 | FAM192A      |
| chr7:23347599-23351586    | 3   | IGF2BP3      |
| chrX:70404714-70407075    | 23  | KIF4A        |
| chr4:76130655-76136412    | 45  | NUP54        |
| chr7:157220688-157225539  | 3   | UBE3C        |
| chr19:12145257-12147802   | 5   | ZNF625-ZNF20 |
| chr2:152542738-152581049  | 32  | FMNL2        |
| chr11:64193077-64194620   | 40  | STIP1        |
| chr8:93786222-93816515    | 12  | TMEM67       |
| chr16:50333573-50340086   | 7   | BRD7         |
| chr3:122833316-122860202  | 7   | DIRC2        |
| chr3:184324877-184328990  | 3   | EIF4G1       |
| chr3:122461223-122467429  | 7   | KPNA1        |
| chr22:38361398-38380990   | 12  | LOC400927    |
| chr8:100225172-100233537  | 5   | SPAG1        |
| chr4:53414614-53453133    | 7   | FIP1L1       |
| chr3:32757013-32757274    | 37  | nogene       |
| chr11:122064179-122089048 | 11  | nogene       |
| chr20:34065043-34078553   | 40  | RALY         |
| chr16:53933984-53937294   | 16  | FTO          |
| chr5:34686871-34688248    | 11  | RAI14        |
| chr14:35721687-35725153   | 10  | RALGAPA1     |
| chr1:54036609-54047372    | 11  | TMEM59       |
| chr16:27701588-27708920   | 31  | KIAA0556     |
| chr12:53018797-53022627   | 19  | EIF4B        |
| chr12:122232129-122232968 | 6   | VPS33A       |
| chr8:61633682-61644632    | 12  | ASPH         |
| chr22:17655661-17689142   | 15  | BCL2L13      |

|                           |     |         |
|---------------------------|-----|---------|
| chr7:2360709-2364529      | 138 | EIF3B   |
| chr20:16526091-16528440   | 329 | KIF16B  |
| chr2:113951478-113955706  | 17  | ACTR3   |
| chr11:67180078-67181892   | 42  | KDM2A   |
| chr18:24070750-24071023   | 10  | nogene  |
| chr17:81613317-81629805   | 58  | NPLOC4  |
| chr13:25307805-25321093   | 23  | NUPL1   |
| chr16:14580873-14586361   | 2   | PARN    |
| chr18:79933968-79935598   | 29  | PQLC1   |
| chr17:80339200-80340356   | 10  | RNF213  |
| chr21:33460412-33468926   | 11  | TMEM50B |
| chr6:43572505-43573601    | 11  | XPO5    |
| chr5:168399487-168406327  | 10  | WWC1    |
| chr8:130179263-130358143  | 10  | ASAP1   |
| chr14:65455620-65561766   | 11  | FUT8    |
| chr2:239156651-239176563  | 18  | HDAC4   |
| chr11:2570627-2572986     | 13  | KCNQ1   |
| chr18:24178012-24179835   | 6   | OSBPL1A |
| chr10:70209204-70218817   | 53  | PPA1    |
| chr19:45025328-45028992   | 85  | RELB    |
| chr1:236168705-236180028  | 54  | GPR137B |
| chr3:52470858-52473829    | 7   | NISCH   |
| chr10:97390422-97393760   | 38  | RRP12   |
| chr21:33559229-33559775   | 17  | SON     |
| chr15:89877305-89889140   | 19  | AP3S2   |
| chr5:25177590-25191033    | 4   | nogene  |
| chr9:97610345-97611699    | 17  | TSTD2   |
| chr2:229407231-229477253  | 10  | DNER    |
| chr21:36754179-36767285   | 12  | HLCS    |
| chr11:108317372-108321420 | 9   | ATM     |
| chr1:22078428-22091501    | 18  | CDC42   |
| chr1:15768527-15774796    | 12  | FBLIM1  |
| chr3:160366042-160384646  | 10  | IFT80   |
| chr9:6719070-6720997      | 19  | KDM4C   |
| chr18:51046919-51049324   | 45  | SMAD4   |
| chr9:2028986-2039900      | 31  | SMARCA2 |
| chr10:115461940-115469329 | 93  | ATRNL1  |
| chr21:15762890-15791664   | 4   | USP25   |
| chr7:42145437-42148468    | 19  | GLI3    |
| chr1:205103856-205105168  | 14  | RBBP5   |
| chr8:124515745-124516030  | 5   | TATDN1  |
| chr9:95240648-95249369    | 53  | FANCC   |
| chr15:22909193-22912275   | 6   | CYFIP1  |

|                           |     |           |
|---------------------------|-----|-----------|
| chr5:33561026-33596060    | 2   | ADAMTS12  |
| chr12:1754257-1778025     | 3   | ADIPOR2   |
| chr1:27558304-27558883    | 14  | AHDC1     |
| chr8:130214555-130358143  | 45  | ASAP1     |
| chr2:38315283-38319019    | 8   | ATL2      |
| chr6:80127546-80273221    | 3   | BCKDHB    |
| chr12:28305648-28307749   | 863 | CCDC91    |
| chr2:61872081-61872588    | 31  | CCT4      |
| chr17:56844018-56848065   | 76  | DGKE      |
| chr20:35547411-35548865   | 17  | ERGIC3    |
| chr6:592468-610178        | 15  | EXOC2     |
| chr17:44804587-44807469   | 6   | GJC1      |
| chr14:59475868-59479351   | 4   | L3HYPDH   |
| chr4:119457970-119462979  | 19  | LOC645513 |
| chr2:39292772-39309519    | 19  | MAP4K3    |
| chr3:52760794-52763624    | 24  | NEK4      |
| chr4:103548742-103593429  | 35  | nogene    |
| chr11:3702462-3702892     | 5   | NUP98     |
| chr3:111112029-111122238  | 46  | PVRL3     |
| chr15:67829178-67833257   | 7   | SKOR1     |
| chr17:29451454-29482288   | 15  | TAOK1     |
| chr7:66240324-66248646    | 92  | TPST1     |
| chr14:75707017-75720703   | 33  | TLL5      |
| chr7:157223253-157248580  | 8   | UBE3C     |
| chr1:77711746-77714783    | 33  | USP33     |
| chr8:123427923-123437334  | 7   | WDYHV1    |
| chr2:61499712-61502310    | 16  | XPO1      |
| chr3:101652495-101652938  | 27  | ZBTB11    |
| chr10:124942456-124974398 | 11  | ZRANB1    |
| chr13:28174271-28239696   | 14  | PAN3      |
| chr7:134148237-134174636  | 13  | LRGUK     |
| chr12:104861290-104895345 | 12  | SLC41A2   |
| chr16:70276485-70282784   | 19  | AARS      |
| chr10:125038996-125088319 | 28  | CTBP2     |
| chr5:181241491-181242345  | 160 | GNB2L1    |
| chr13:48373404-48381443   | 11  | RB1       |
| chr3:123209198-123225297  | 10  | SEC22A    |
| chr9:120873978-120874756  | 5   | PHF19     |
| chr7:75510930-75511289    | 4   | PMS2P3    |
| chr19:32915336-32918339   | 107 | CEP89     |
| chr17:30785918-30804108   | 4   | CRLF3     |
| chr2:99369391-99371730    | 11  | EIF5B     |
| chr13:49168612-49175541   | 4   | FNDC3A    |

|                           |     |                 |
|---------------------------|-----|-----------------|
| chr16:47593499-47610920   | 4   | PHKB            |
| chr6:89342323-89343756    | 30  | UBE2J1          |
| chr20:51639342-51690819   | 13  | ATP9A           |
| chr5:173080584-173086626  | 7   | CREBRF          |
| chr7:6432836-6435020      | 17  | DAGLB           |
| chr9:93471140-93497599    | 94  | FAM120A         |
| chr2:9995878-9999029      | 7   | GRHL1           |
| chr10:92483254-92508205   | 50  | IDE             |
| chr15:41085368-41092182   | 2   | INO80           |
| chr11:77941179-77961138   | 2   | INTS4           |
| chr12:87377107-87415076   | 2   | nogene          |
| chr15:68141945-68173892   | 117 | PIAS1           |
| chr1:145839889-145841071  | 20  | POLR3C          |
| chr1:32825312-32828081    | 2   | S100BPB         |
| chr16:68273817-68275249   | 30  | SLC7A6          |
| chr12:110626361-110632559 | 8   | TCTN1           |
| chr2:32777881-32787149    | 50  | TTC27           |
| chr7:149198332-149213814  | 2   | ZNF282          |
| chr5:179719667-179720560  | 25  | CANX            |
| chr11:122776218-122779695 | 12  | UBASH3B         |
| chr1:26442730-26447660    | 10  | DHDDS           |
| chr7:78343777-78369213    | 10  | MAGI2           |
| chr4:139116648-139139497  | 78  | nogene          |
| chr9:123169901-123236969  | 4   | STRBP           |
| chr9:83678440-83683066    | 63  | UBQLN1          |
| chr8:123436452-123448224  | 10  | WDYHV1          |
| chr22:28710005-28719485   | 7   | CHEK2           |
| chr4:5719247-5733435      | 17  | EVC             |
| chr11:11372514-11379264   | 11  | GALNT18         |
| chr12:46261295-46261851   | 20  | nogene          |
| chr2:189753915-189754345  | 4   | OSGEPL1         |
| chr4:39869393-39890364    | 17  | PDS5A           |
| chr12:112477650-112478015 | 70  | PTPN11          |
| chr7:129014978-129041717  | 13  | TNPO3           |
| chr17:4032125-4033002     | 10  | ZZEF1           |
| chr6:135453340-135455926  | 21  | AHI1            |
| chr5:140438502-140449305  | 4   | ANKHD1-EIF4EBP3 |
| chr10:68747373-68749685   | 16  | CCAR1           |
| chr1:77858937-77864028    | 97  | FAM73A          |
| chr3:23310451-23310727    | 2   | nogene          |
| chr7:66775226-66799414    | 65  | RABGEF1         |
| chr12:123334052-123348133 | 12  | SBNO1           |
| chr1:179342113-179343635  | 28  | SOAT1           |

|                           |     |          |
|---------------------------|-----|----------|
| chr15:93004616-93014909   | 14  | CHD2     |
| chr8:94824892-94849532    | 13  | INTS8    |
| chr4:4237826-4246343      | 141 | TMEM128  |
| chr10:104008176-104018289 | 14  | SLK      |
| chr19:18742909-18749875   | 19  | CRTC1    |
| chr12:125102678-125107268 | 57  | AACS     |
| chrX:75098941-75114834    | 25  | ABCB7    |
| chr4:87108158-87115299    | 12  | AFF1     |
| chr5:77046346-77048987    | 30  | AGGF1    |
| chr1:243552728-243573048  | 17  | AKT3     |
| chr9:98777404-98782573    | 11  | ANKS6    |
| chr2:223775900-223777869  | 26  | AP1S3    |
| chr5:78089392-78101025    | 3   | AP3B1    |
| chr21:25954589-25997416   | 16  | APP      |
| chr20:32362355-32369123   | 3   | ASXL1    |
| chr10:68747160-68757377   | 3   | CCAR1    |
| chrX:2714421-2720424      | 4   | CD99     |
| chr5:138198198-138201448  | 15  | CDC23    |
| chr4:55999301-55999645    | 12  | CEP135   |
| chr3:138505294-138532570  | 3   | CEP70    |
| chr1:239718795-239827378  | 14  | CHRM3    |
| chr1:47374908-47375293    | 8   | CMPK1    |
| chr11:61415665-61429290   | 14  | CPSF7    |
| chr20:49066191-49067280   | 39  | CSE1L    |
| chr10:68973544-68981581   | 23  | DDX21    |
| chr11:118786051-118786518 | 191 | DDX6     |
| chr22:38537591-38568289   | 81  | DMC1     |
| chr13:95709226-95725252   | 38  | DNAJC3   |
| chr6:83096730-83097115    | 3   | DOPEY1   |
| chr15:76274411-76295737   | 188 | ETFA     |
| chr1:11070899-11076948    | 103 | EXOSC10  |
| chr22:45332424-45332710   | 13  | FAM118A  |
| chr2:153900935-153944639  | 31  | GALNT13  |
| chr5:154911726-154913038  | 43  | GEMIN5   |
| chr3:155919232-155925366  | 54  | GMPS     |
| chr2:26279993-26285571    | 7   | HADHB    |
| chr10:69392124-69398828   | 3   | HK1      |
| chr11:9423005-9425262     | 26  | IPO7     |
| chr8:41974703-41981954    | 3   | KAT6A    |
| chr8:125049005-125057666  | 7   | KIAA0196 |
| chr7:138905021-138912460  | 3   | KIAA1549 |
| chrX:65523559-65532630    | 41  | LAS1L    |
| chr3:65609743-65622088    | 29  | MAGI1    |

|                           |     |              |
|---------------------------|-----|--------------|
| chr12:111865249-111871180 | 58  | MAPKAPK5     |
| chr15:66119085-66128411   | 24  | MEGF11       |
| chrX:107916001-107917649  | 3   | MID2         |
| chr13:23841334-23886506   | 19  | MIPEP        |
| chr6:31743903-31744581    | 17  | MSH5         |
| chr15:71991102-71994585   | 4   | MYO9A        |
| chr11:20062306-20083179   | 13  | NAV2         |
| chr6:125874888-125878370  | 6   | NCOA7        |
| chr5:142131807-142140629  | 9   | NDFIP1       |
| chr7:66551519-66578727    | 2   | nogene       |
| chr10:27566831-27578713   | 89  | nogene       |
| chr11:65505662-65506054   | 4   | nogene       |
| chr2:241566725-241567620  | 3   | nogene       |
| chr7:66848488-66880877    | 4   | nogene       |
| chr19:11648357-11654411   | 29  | nogene       |
| chr3:132626690-132631479  | 4   | NPHP3-ACAD11 |
| chr2:174123179-174142000  | 181 | OLA1         |
| chr13:28256291-28281379   | 24  | PAN3         |
| chr14:71026116-71036157   | 55  | PCNX         |
| chr6:169712385-169721111  | 11  | PHF10        |
| chr7:102566996-102569924  | 35  | POLR2J3      |
| chr19:55245119-55245678   | 45  | PPP6R1       |
| chr7:1569123-1569360      | 33  | PSMG3        |
| chr13:19730238-19782791   | 2   | PSPC1        |
| chr2:119920068-119926666  | 20  | PTPN4        |
| chr3:61981707-62003497    | 3   | PTPRG        |
| chr1:174637374-174811960  | 10  | RABGAP1L     |
| chr5:170892386-170896115  | 56  | RANBP17      |
| chr4:53145332-53147370    | 10  | SCFD2        |
| chr1:41142877-41151684    | 11  | SCMH1        |
| chr18:12963159-12971251   | 2   | SEH1L        |
| chr3:196899665-196903610  | 78  | SENP5        |
| chr20:44509890-44512994   | 25  | SERINC3      |
| chr2:171809605-171815202  | 14  | SLC25A12     |
| chr17:48112030-48113401   | 265 | SNX11        |
| chr7:17868406-17891635    | 2   | SNX13        |
| chr13:49927918-49931134   | 3   | SPRYD7       |
| chr2:45546316-45553730    | 10  | SRBD1        |
| chr1:54251615-54257186    | 29  | SSBP3        |
| chr1:43831654-43838311    | 11  | ST3GAL3      |
| chr19:19007346-19008428   | 38  | SUGP2        |
| chr1:235427139-235434280  | 3   | TBCE         |
| chr6:84738496-84762748    | 10  | TBX18        |

|                           |     |          |
|---------------------------|-----|----------|
| chr1:246548544-246556721  | 11  | TFB2M    |
| chr19:41344746-41348455   | 18  | TGFB1    |
| chr2:43505621-43527988    | 12  | THADA    |
| chr2:70224553-70236175    | 58  | TIA1     |
| chr17:44014356-44015155   | 3   | TMEM101  |
| chr12:88148287-88176319   | 51  | TMTC3    |
| chr17:42610107-42659552   | 23  | TUBG1    |
| chr15:43377846-43386330   | 10  | TUBGCP4  |
| chr15:42976716-43025429   | 4   | UBR1     |
| chr11:18570213-18578808   | 4   | UEVLD    |
| chr15:50462279-50471795   | 26  | USP8     |
| chr3:51440969-51441897    | 12  | VPRBP    |
| chr15:62033440-62044255   | 151 | VPS13C   |
| chr2:63404047-63439871    | 26  | WDPCP    |
| chr16:74885652-74886396   | 6   | WDR59    |
| chr6:38082391-38116739    | 46  | ZFAND3   |
| chr18:76371466-76380303   | 45  | ZNF516   |
| chr16:16124788-16125911   | 79  | ABCC1    |
| chrX:23713134-23722753    | 21  | ACOT9    |
| chr20:41423491-41426153   | 13  | CHD6     |
| chr12:108652271-108701323 | 12  | CORO1C   |
| chr11:33141666-33141986   | 21  | CSTF3    |
| chr1:245017241-245083688  | 19  | EFCAB2   |
| chr3:68998010-69004482    | 16  | EOGT     |
| chr11:22674849-22685789   | 5   | GAS2     |
| chr5:74745677-74751493    | 5   | GFM2     |
| chr15:28245880-28246897   | 14  | HERC2    |
| chr4:3180514-3189093      | 10  | HTT      |
| chrX:53614533-53617446    | 11  | HUWE1    |
| chr1:37866458-37874088    | 38  | INPP5B   |
| chr18:21765771-21849388   | 7   | MIB1     |
| chr1:32821224-32821536    | 10  | nogene   |
| chr4:41004759-41005200    | 13  | nogene   |
| chr7:66882892-66886455    | 9   | nogene   |
| chr3:195897236-195897424  | 2   | nogene   |
| chr3:136326802-136328857  | 11  | PCCB     |
| chr2:196890827-196898369  | 11  | PGAP1    |
| chr22:20810966-20813506   | 2   | PI4KA    |
| chr11:20402918-20408032   | 2   | PRMT3    |
| chr3:185598411-185626393  | 2   | SENP2    |
| chr4:146503848-146510049  | 13  | SLC10A7  |
| chr1:108143542-108161293  | 21  | SLC25A24 |
| chr6:121303616-121310847  | 27  | TBC1D32  |



|                           |     |                |
|---------------------------|-----|----------------|
| chr3:129880308-129884971  | 8   | TMCC1          |
| chr3:12742453-12748792    | 2   | TMEM40         |
| chr21:37187048-37196036   | 33  | TTC3           |
| chr1:162499954-162503848  | 2   | UHMK1          |
| chr18:74877196-74890038   | 71  | ZNF407         |
| chr8:67076481-67095732    | 9   | CSPP1          |
| chr21:43592224-43633421   | 10  | HSF2BP         |
| chr15:76574157-76665789   | 29  | SCAPER         |
| chr2:28850327-28852499    | 3   | TRMT61B        |
| chr19:9652952-9656653     | 12  | ZNF562         |
| chr9:85585462-85633374    | 34  | AGTPBP1        |
| chr17:56848695-56858665   | 13  | DGKE           |
| chr11:108267170-108271406 | 11  | ATM            |
| chr17:31973145-31988497   | 11  | SUZ12          |
| chr9:41025763-41031512    | 47  | PGM5P2         |
| chr16:19706591-19711440   | 52  | KNOP1          |
| chr6:35637013-35646850    | 30  | FKBP5          |
| chr16:70261043-70262524   | 213 | AARS           |
| chr3:104764378-104817613  | 19  | nogene         |
| chr3:100555208-100568967  | 15  | TMEM45A        |
| chr14:21401956-21403663   | 117 | CHD8           |
| chr13:98457167-98466561   | 42  | STK24          |
| chr8:53769617-53801896    | 15  | ATP6V1H        |
| chr17:8506317-8509949     | 25  | MYH10          |
| chr6:79060477-79060818    | 13  | PHIP           |
| chr4:101193558-101196116  | 12  | PPP3CA         |
| chr3:29868857-29899755    | 56  | RBMS3          |
| chr6:13579450-13584225    | 189 | SIRT5          |
| chr4:138214584-138236451  | 23  | SLC7A11        |
| chr14:77552095-77562489   | 6   | SPTLC2         |
| chr20:62852722-62860308   | 12  | TCFL5          |
| chr20:50127974-50130947   | 10  | TMEM189-UBE2V1 |
| chr14:93214928-93215281   | 2   | UBR7           |
| chr11:113852500-113854335 | 40  | USP28          |
| chr17:37151300-37155780   | 11  | ACACA          |
| chr8:53743576-53772167    | 9   | ATP6V1H        |
| chr6:83096924-83100886    | 45  | DOPEY1         |
| chr11:103243692-103259977 | 13  | DYNC2H1        |
| chr11:94485923-94490965   | 50  | MRE11A         |
| chr13:77081426-77087633   | 11  | MYCBP2         |
| chr17:3726583-3726839     | 12  | nogene         |
| chr5:127523459-127539143  | 14  | PRRC1          |
| chr14:67685014-67693052   | 10  | RDH11          |

|                           |     |             |
|---------------------------|-----|-------------|
| chr2:37929261-38004216    | 2   | RMDN2       |
| chr9:136465961-136468512  | 2   | SEC16A      |
| chr6:79654494-79673799    | 9   | SH3BGRL2    |
| chr1:245764040-245929937  | 11  | SMYD3       |
| chr15:74466035-74479278   | 2   | UBL7-AS1    |
| chr15:63529013-63537156   | 216 | USP3        |
| chr3:141368644-141386937  | 14  | ZBTB38      |
| chr2:144424795-144430026  | 4   | ZEB2        |
| chr14:103405075-103405267 | 20  | MARK3       |
| chr3:114061841-114062119  | 24  | nogene      |
| chr8:53769617-53817530    | 3   | ATP6V1H     |
| chr16:4407500-4408251     | 5   | CORO7-PAM16 |
| chr16:70226769-70227260   | 3   | nogene      |
| chr2:65112005-65112257    | 3   | nogene      |
| chr3:51541497-51552063    | 108 | nogene      |
| chr12:5182976-5276889     | 12  | nogene      |
| chr16:16247394-16256158   | 12  | NOMO3       |
| chr11:68519500-68548204   | 34  | PPP6R3      |
| chr16:70526586-70532620   | 11  | SF3B3       |
| chr5:33448540-33453412    | 24  | TARS        |
| chr1:151774412-151783049  | 12  | TDRKH       |
| chr1:117084017-117086522  | 11  | TTF2        |
| chr1:52263772-52303925    | 5   | ZFYVE9      |
| chr1:28271673-28275015    | 7   | SESN2       |
| chr15:75605149-75621056   | 15  | SNUPN       |
| chr15:72518066-72572165   | 43  | ARIH1       |
| chr11:66748378-66828364   | 8   | C11orf80    |
| chr1:92662718-92704744    | 38  | EVI5        |
| chr3:56623643-56628614    | 9   | FAM208A     |
| chr17:35101200-35106481   | 3   | RAD51D      |
| chr6:88906364-88941180    | 17  | RNGTT       |
| chr17:62560015-62565137   | 10  | TLK2        |
| chr8:140360049-140426641  | 5   | TRAPPC9     |
| chr10:37831231-37838111   | 5   | ZNF248      |
| chr17:41912419-41913900   | 6   | ACLY        |
| chr4:22435310-22473843    | 10  | ADGRA3      |
| chr15:92945820-92967513   | 13  | CHD2        |
| chr11:46780193-46788773   | 5   | CKAP5       |
| chr3:32357372-32367988    | 10  | CMTM8       |
| chr17:73199864-73201900   | 10  | COG1        |
| chr3:186064416-186066072  | 4   | ETV5        |
| chr14:65721774-65724323   | 33  | FUT8        |
| chr19:34377502-34377881   | 19  | GPI         |

|                           |     |         |
|---------------------------|-----|---------|
| chr8:94867139-94876489    | 46  | INTS8   |
| chr14:50735515-50744365   | 5   | NIN     |
| chr10:34799340-34799743   | 10  | nogene  |
| chr11:32927156-32928123   | 18  | QSER1   |
| chr19:47143493-47169923   | 51  | SAE1    |
| chr9:100498764-100550160  | 24  | TMEFF1  |
| chr7:66941847-66945261    | 116 | TMEM248 |
| chr22:43039779-43046573   | 32  | TLL1    |
| chr8:19364071-19373660    | 10  | SH2D4A  |
| chr1:235335241-235342883  | 3   | GGPS1   |
| chr1:236564497-236569124  | 13  | HEATR1  |
| chr4:150467672-150599131  | 4   | LRBA    |
| chr1:62829039-62841547    | 19  | ATG4C   |
| chr2:171448680-171469030  | 55  | DCAF17  |
| chr1:92732509-92736627    | 108 | EVI5    |
| chrX:72462003-72495268    | 34  | HDAC8   |
| chr15:59084128-59089759   | 5   | RNF111  |
| chr12:123348028-123350441 | 21  | SBNO1   |
| chr16:70526586-70538460   | 3   | SF3B3   |
| chr5:121974195-121975387  | 14  | SRFBP1  |
| chr17:4216982-4235890     | 20  | ANKFY1  |
| chr1:26432890-26460144    | 5   | DHDDS   |
| chr3:51260155-51280204    | 4   | DOCK3   |
| chr11:9408485-9414411     | 51  | IPO7    |
| chr2:206160881-206161132  | 24  | nogene  |
| chr12:107742220-107746424 | 7   | PRDM4   |
| chr14:90676522-90695578   | 5   | TTC7B   |
| chr7:16698047-16704669    | 17  | BZW2    |
| chr9:33060464-33071892    | 10  | SMU1    |
| chr17:61776400-61801474   | 26  | BRIP1   |
| chr6:43527633-43534007    | 13  | XPO5    |
| chr12:28304625-28307749   | 76  | CCDC91  |
| chr6:104824813-104843298  | 19  | HACE1   |
| chr5:618989-624579        | 95  | CEP72   |
| chr12:52178502-52179217   | 4   | nogene  |
| chr16:70010750-70014167   | 29  | PDXDC2P |
| chr5:37238856-37239869    | 17  | C5orf42 |
| chr10:84417770-84464016   | 16  | CCSER2  |
| chr21:36391550-36394650   | 20  | CHAF1B  |
| chr1:85816787-85849406    | 36  | COL24A1 |
| chrX:130042880-130043126  | 2   | nogene  |
| chr11:18336376-18337175   | 12  | nogene  |
| chr3:38183002-38242778    | 2   | OXS1    |

|                           |     |          |
|---------------------------|-----|----------|
| chr3:50105076-50110770    | 2   | RBM5     |
| chr19:45011935-45012276   | 2   | RELB     |
| chr2:127954985-127955344  | 7   | SAP130   |
| chr20:34477771-34481206   | 31  | ITCH     |
| chr4:15625251-15630791    | 9   | FBXL5    |
| chr11:67291475-67292180   | 4   | ANKRD13D |
| chr1:246621428-246634587  | 89  | CNST     |
| chr9:20907149-20933103    | 56  | FOCAD    |
| chr15:63693963-63716473   | 10  | HERC1    |
| chr11:18281949-18285459   | 14  | HPS5     |
| chr3:197826877-197832317  | 11  | LRCH3    |
| chr10:121959323-121961517 | 13  | NSMCE4A  |
| chr1:109336239-109369589  | 21  | SORT1    |
| chr10:119578725-119588248 | 34  | TIAL1    |
| chr7:157220688-157248580  | 41  | UBE3C    |
| chr9:113969116-113988580  | 36  | ZNF618   |
| chr4:2625261-2631169      | 50  | FAM193A  |
| chr6:130184102-130184623  | 53  | SAMD3    |
| chr14:67656415-67662535   | 12  | VTI1B    |
| chr2:222900673-222909150  | 23  | ACSL3    |
| chr10:125074742-125111093 | 16  | CTBP2    |
| chr3:121493477-121498670  | 5   | POLQ     |
| chr16:70538322-70539207   | 4   | SF3B3    |
| chr16:48355337-48362430   | 11  | SIAH1    |
| chr17:81913773-81915681   | 12  | SIRT7    |
| chr1:116019581-116020885  | 5   | SLC22A15 |
| chr12:104288930-104289542 | 14  | TXNRD1   |
| chr19:45522167-45522818   | 37  | VASP     |
| chr21:25741572-25758204   | 16  | GABPA    |
| chr14:55652849-55659703   | 12  | KTN1     |
| chr16:69653235-69653428   | 10  | NFAT5    |
| chr9:120518426-120539164  | 28  | CDK5RAP2 |
| chr11:687910-691598       | 3   | DEAF1    |
| chr1:44247938-44319744    | 4   | ERI3     |
| chr12:79832331-79872938   | 3   | PPP1R12A |
| chr18:9583116-9595153     | 362 | PPP4R1   |
| chr6:45003652-45020632    | 3   | SUPT3H   |
| chr17:31993864-31995762   | 27  | SUZ12    |
| chr6:82210813-82212793    | 403 | IBTK     |
| chr1:42265114-42311110    | 167 | FOXJ3    |
| chr20:5958527-5968025     | 38  | MCM8     |
| chr17:50989676-50990668   | 10  | SPAG9    |
| chr7:100111727-100112917  | 5   | TAF6     |

|                           |     |          |
|---------------------------|-----|----------|
| chr15:71348151-71411823   | 12  | THSD4    |
| chr3:51470928-51492488    | 5   | VPRBP    |
| chr9:33953284-33960878    | 9   | UBAP2    |
| chr15:28143872-28146344   | 15  | HERC2    |
| chr15:89299799-89301442   | 13  | FANCI    |
| chrX:65106918-65113813    | 15  | nogene   |
| chrX:155545095-155548224  | 14  | TMLHE    |
| chr1:6192929-6197756      | 70  | RPL22    |
| chr19:41292244-41292511   | 27  | HNRNPUL1 |
| chr6:17507168-17507726    | 9   | CAP2     |
| chr1:156317165-156335888  | 13  | CCT3     |
| chr13:50433412-50528064   | 3   | DLEU1    |
| chr5:131647089-131651999  | 9   | FNIP1    |
| chr4:39841947-39844801    | 69  | PDS5A    |
| chr19:18342858-18343415   | 13  | PGPEP1   |
| chr11:68567013-68603492   | 16  | PPP6R3   |
| chr18:22992747-22996462   | 51  | RBBP8    |
| chr18:20954782-20955245   | 6   | ROCK1    |
| chr6:75702644-75703072    | 157 | SENP6    |
| chr17:18294702-18306966   | 24  | TOP3A    |
| chr15:50631416-50648885   | 46  | TRPM7    |
| chr1:180803387-180811488  | 25  | XPR1     |
| chr9:110136126-110138539  | 156 | AKAP2    |
| chr7:158797941-158799072  | 13  | ESYT2    |
| chr10:34374873-34401917   | 9   | PARD3    |
| chrX:345515-347693        | 116 | PPP2R3B  |
| chr6:111387764-111416472  | 10  | REV3L    |
| chr11:77941179-77981576   | 9   | INTS4    |
| chr12:111883580-111883768 | 11  | MAPKAPK5 |
| chr2:189805651-189818180  | 45  | PMS1     |
| chr6:123316456-123382147  | 27  | TRDN     |
| chr11:76958978-76998821   | 37  | ACER3    |
| chr11:94429910-94437235   | 3   | MRE11A   |
| chrX:68192918-68210282    | 16  | OPHN1    |
| chr14:50635213-50645014   | 29  | SAV1     |
| chr16:68859883-68880630   | 154 | TANGO6   |
| chr15:42811687-42840433   | 4   | TTBK2    |
| chr19:36712370-36712867   | 20  | ZNF567   |
| chr22:21769194-21788808   | 15  | MAPK1    |
| chr15:84538531-84555070   | 78  | UBE2Q2P1 |
| chr6:133980081-133984671  | 33  | TBPL1    |
| chr12:99655066-99825389   | 3   | ANKS1B   |
| chr3:43576691-43580472    | 13  | ANO10    |

|                           |     |          |
|---------------------------|-----|----------|
| chr10:131970637-131973943 | 18  | BNIP3    |
| chr12:69259427-69262562   | 3   | CPSF6    |
| chr4:107944969-107947537  | 13  | CYP2U1   |
| chr5:112985834-112992248  | 33  | DCP2     |
| chr5:112985834-113008042  | 3   | DCP2     |
| chr15:65752378-65761438   | 97  | DENND4A  |
| chr9:36233919-36246482    | 2   | GENE     |
| chr2:206046503-206063244  | 2   | INO80D   |
| chr1:110222963-110226178  | 46  | KCNC4    |
| chr4:122192228-122199450  | 3   | KIAA1109 |
| chr7:138867974-138869761  | 11  | KIAA1549 |
| chr19:33061715-33062256   | 55  | nogene   |
| chr1:168249491-168251000  | 12  | nogene   |
| chr1:51750144-51772182    | 2   | OSBPL9   |
| chr3:167704841-167725473  | 25  | PDCD10   |
| chr19:11415946-11417059   | 6   | RGL3     |
| chr1:52978216-52980543    | 3   | SCP2     |
| chr12:50094436-50096972   | 33  | SMARCD1  |
| chr7:17890362-17897446    | 226 | SNX13    |
| chr9:33886880-33912098    | 67  | UBE2R2   |
| chr2:63856305-63862928    | 71  | UGP2     |
| chr5:69294792-69303929    | 3   | CCDC125  |
| chr10:96907264-96952196   | 69  | LCOR     |
| chr15:75394679-75400156   | 19  | SIN3A    |
| chr9:111914604-111933035  | 3   | UGCG     |
| chr6:169632946-169652008  | 113 | WDR27    |
| chr7:64541729-64544432    | 40  | ZNF680   |
| chr10:74022453-74022731   | 17  | nogene   |
| chr2:202282350-202287724  | 55  | NOP58    |
| chr2:85647929-85649203    | 9   | USP39    |
| chr16:11003073-11024921   | 12  | CLEC16A  |
| chr20:37198396-37213865   | 45  | RPN2     |
| chr12:110322991-110328017 | 12  | ATP2A2   |
| chr1:179986168-179997175  | 32  | CEP350   |
| chr2:65331986-65334773    | 5   | SPRED2   |
| chr3:33684358-33689932    | 146 | CLASP2   |
| chr10:842931-864270       | 2   | LARP4B   |
| chr8:144135635-144136000  | 17  | nogene   |
| chr22:42019661-42030823   | 2   | WBP2NL   |
| chr8:96879797-96880005    | 8   | CPQ      |
| chr12:62689698-62720289   | 47  | PPM1H    |
| chr8:47783741-47794501    | 17  | PRKDC    |
| chr4:128952768-128999794  | 3   | SCLT1    |

|                           |    |                |
|---------------------------|----|----------------|
| chr5:128112813-128114681  | 3  | SLC12A2        |
| chr6:116645713-116660846  | 57 | ZUFSP          |
| chr10:127061667-127127764 | 72 | DOCK1          |
| chr11:62723586-62724426   | 72 | HNRNPUL2-BSCL2 |
| chr8:73542901-73552319    | 3  | STAU2          |
| chr6:82220589-82231842    | 11 | IBTK           |
| chr16:89426766-89431326   | 11 | ANKRD11        |
| chr2:23798137-23823569    | 16 | ATAD2B         |
| chr16:15695907-15696860   | 23 | NDE1           |
| chr14:96520054-96525391   | 62 | PAPOLA         |
| chr1:117456084-117466427  | 23 | MAN1A2         |
| chr10:101975211-102014024 | 3  | C10orf76       |
| chr11:93683558-93687865   | 20 | CEP295         |
| chr16:58580632-58581515   | 8  | CNOT1          |
| chr17:56848695-56862251   | 35 | DGKE           |
| chr6:83096730-83100886    | 13 | DOPEY1         |
| chr4:139060323-139062057  | 7  | ELF2           |
| chr12:22643762-22661205   | 8  | ETNK1          |
| chr2:169540050-169557297  | 9  | FASTKD1        |
| chr12:55789074-55800900   | 24 | SARNP          |
| chr11:66365381-66366564   | 38 | SLC29A2        |
| chr8:38819521-38820635    | 15 | TACC1          |
| chr3:44629064-44632599    | 8  | ZNF197         |
| chr19:11058257-11060187   | 4  | SMARCA4        |
| chr5:55343330-55366875    | 13 | SKIV2L2        |
| chr4:105386566-105438036  | 30 | PPA2           |
| chr1:27906927-27907282    | 14 | RPA2           |
| chr2:32429145-32453942    | 3  | BIRC6          |
| chr7:132838398-132885745  | 9  | CHCHD3         |
| chr1:236249884-236253505  | 3  | ERO1B          |
| chr2:24510968-24584560    | 9  | NCOA1          |
| chr7:5729431-5741644      | 12 | RNF216         |
| chr3:47658557-47678311    | 9  | SMARCC1        |
| chr1:204112914-204117707  | 75 | SOX13          |
| chr15:43017094-43025429   | 12 | UBR1           |
| chr4:41142986-41143142    | 11 | APBB2          |
| chr1:225554905-225567414  | 32 | ENAH           |
| chr1:155753203-155760641  | 4  | GON4L          |
| chr6:161048615-161049979  | 64 | MAP3K4         |
| chr3:9653620-9662375      | 3  | MTMR14         |
| chr3:58077045-58081776    | 97 | FLNB           |
| chr1:11073933-11076948    | 35 | EXOSC10        |
| chr3:9750944-9754885      | 30 | OGG1           |

|                           |     |              |
|---------------------------|-----|--------------|
| chrX:134377571-134378106  | 9   | PHF6         |
| chr5:77034417-77036720    | 45  | AGGF1        |
| chr2:152549020-152581049  | 3   | FMNL2        |
| chr20:63882718-63931022   | 3   | TPD52L2      |
| chr5:77436260-77440997    | 3   | WDR41        |
| chr9:71750042-71750385    | 105 | TMEM2        |
| chr1:225828724-225831959  | 7   | EPHX1        |
| chr1:51402434-51465326    | 13  | EPS15        |
| chr6:77088401-77151974    | 7   | nogene       |
| chr17:5297344-5308822     | 3   | RABEP1       |
| chr2:86770022-86771712    | 20  | RMND5A       |
| chr19:16081912-16089120   | 35  | TPM4         |
| chrX:118404337-118410959  | 37  | WDR44        |
| chr1:75732643-75750546    | 5   | ACADM        |
| chr4:129726921-129771562  | 5   | LOC101927282 |
| chr11:67281975-67282117   | 2   | nogene       |
| chr16:23621361-23626397   | 14  | PALB2        |
| chr2:85356966-85387225    | 6   | ELMOD3       |
| chr1:21861756-21862115    | 19  | HSPG2        |
| chr9:21837907-21854870    | 11  | MTAP         |
| chr12:102112107-102118583 | 27  | NUP37        |
| chr10:122392302-122406673 | 9   | PLEKHA1      |
| chr6:75633580-75634811    | 18  | SENP6        |
| chr20:21326278-21334185   | 19  | XRN2         |
| chr17:59257121-59272836   | 4   | GDPD1        |
| chr1:155926675-155927156  | 106 | KIAA0907     |
| chrX:24809897-24826601    | 21  | POLA1        |
| chr9:122877470-122897576  | 43  | RC3H2        |
| chr2:96192368-96195549    | 6   | STARD7       |
| chr16:879569-911079       | 42  | LMF1         |
| chr2:121397139-121410969  | 3   | CLASP1       |
| chr21:33904974-33905710   | 3   | nogene       |
| chr3:47427156-47428670    | 10  | SCAP         |
| chr1:179368799-179395202  | 5   | AXDND1       |
| chr14:46957373-47035304   | 37  | MDGA2        |
| chr9:120820838-120826907  | 16  | PSMD5        |
| chr6:45431862-45438051    | 31  | RUNX2        |
| chr1:243695590-243843282  | 27  | AKT3         |
| chr21:26050999-26053348   | 153 | APP          |
| chr10:31843460-31854206   | 8   | ARHGAP12     |
| chr20:51669996-51690819   | 16  | ATP9A        |
| chr12:111658735-111659345 | 47  | BRAP         |
| chr8:94885066-94885558    | 26  | CCNE2        |



|                          |     |             |
|--------------------------|-----|-------------|
| chr11:47472190-47489024  | 21  | CELF1       |
| chr22:28719394-28725367  | 8   | CHEK2       |
| chr2:207596913-207597483 | 5   | CREB1       |
| chr10:68934198-68936079  | 13  | DDX50       |
| chr2:171725617-171729853 | 13  | DYNC1I2     |
| chr3:5195208-5211216     | 7   | EDEM1       |
| chr14:99914178-99914697  | 14  | EML1        |
| chr10:49528416-49532978  | 3   | ERCC6-PGBD3 |
| chr2:201016990-201024039 | 81  | FAM126B     |
| chr5:108946129-109100519 | 2   | FER         |
| chr9:20819795-20874807   | 45  | FOCAD       |
| chr17:82582740-82584188  | 4   | FOXK2       |
| chr3:155893517-155931880 | 10  | GMPS        |
| chr19:41268222-41281275  | 90  | HNRNPUL1    |
| chr10:76969973-77019099  | 5   | KCNMA1      |
| chr17:47663088-47670832  | 17  | KPNB1       |
| chr10:70339995-70340702  | 11  | LRRC20      |
| chr20:5958527-5985000    | 28  | MCM8        |
| chr17:62010549-62011233  | 24  | MED13       |
| chr17:47456683-47491192  | 19  | MRPL45P2    |
| chr13:35040932-35048684  | 23  | NBEA        |
| chr3:23910810-23911450   | 69  | NKIRAS1     |
| chr16:4466152-4469465    | 131 | NMRAL1      |
| chr7:134145511-134145991 | 11  | nogene      |
| chr9:111005464-111011690 | 84  | nogene      |
| chr8:128009589-128070361 | 35  | nogene      |
| chr5:140281448-140300582 | 11  | PFDN1       |
| chr6:169710235-169721111 | 39  | PHF10       |
| chr7:11057951-11111467   | 2   | PHF14       |
| chr7:6735304-6737936     | 42  | PMS2CL      |
| chr11:65294152-65295990  | 13  | POLA2       |
| chr4:120754552-120811449 | 95  | PRDM5       |
| chr3:170259968-170280403 | 8   | PRKCI       |
| chrX:18320331-18334095   | 11  | SCML2       |
| chr5:134692601-134708888 | 2   | SEC24A      |
| chr2:241030283-241030571 | 11  | SNED1       |
| chr6:36506582-36525642   | 11  | STK38       |
| chr3:67495797-67498295   | 46  | SUCLG2      |
| chr3:17508473-17623913   | 13  | TBC1D5      |
| chr3:119500694-119513719 | 142 | TIMMDC1     |
| chr16:66517135-66549009  | 10  | TK2         |
| chr3:142736378-142792967 | 17  | TRPC1       |
| chr7:139279317-139284574 | 5   | UBN2        |

|                           |     |          |
|---------------------------|-----|----------|
| chr17:78806155-78838750   | 4   | USP36    |
| chr1:21747066-21757783    | 31  | USP48    |
| chr9:133925842-133939219  | 159 | VAV2     |
| chr8:99192875-99275254    | 13  | VPS13B   |
| chr12:132932712-132933155 | 10  | ZNF605   |
| chr2:202297378-202297906  | 76  | NOP58    |
| chr6:47503279-47533755    | 34  | CD2AP    |
| chr4:105686691-105689280  | 12  | INTS12   |
| chr2:176296859-176330660  | 83  | MTX2     |
| chr1:32944018-32945628    | 39  | RNF19B   |
| chr13:75566694-75569507   | 9   | UCHL3    |
| chr2:61370320-61395233    | 27  | USP34    |
| chr14:31364188-31387375   | 12  | HEATR5A  |
| chr3:183663457-183672484  | 6   | KLHL24   |
| chr3:47086194-47098081    | 24  | SETD2    |
| chr4:169120818-169122266  | 3   | SH3RF1   |
| chr10:113086046-113089540 | 10  | TCF7L2   |
| chr8:127890588-128010444  | 11  | nogene   |
| chr12:123313619-123315660 | 53  | SBNO1    |
| chr15:44413335-44427772   | 6   | CASC4    |
| chr8:81713917-81718224    | 42  | ZFAND1   |
| chr14:35307993-35314455   | 15  | PSMA6    |
| chr11:3719411-3720825     | 16  | NUP98    |
| chr20:44620298-44622930   | 3   | ADA      |
| chr2:240523884-240525849  | 4   | ANKMY1   |
| chr8:102843550-102858150  | 15  | AZIN1    |
| chr8:129871374-129879471  | 3   | FAM49B   |
| chrX:107526581-107533550  | 27  | FRMPD3   |
| chr19:18147442-18147624   | 52  | MAST3    |
| chr22:29560852-29561170   | 23  | NIPSNAP1 |
| chr11:47815478-47819458   | 14  | NUP160   |
| chr17:45120172-45121372   | 12  | PLCD3    |
| chr7:87693907-87741579    | 12  | RUNDC3B  |
| chr4:138214584-138223324  | 4   | SLC7A11  |
| chr12:51116314-51117747   | 29  | TFCP2    |
| chr15:61972624-61981478   | 10  | VPS13C   |
| chr8:53970391-54010492    | 16  | TCEA1    |
| chr1:28683582-28697084    | 40  | GMEB1    |
| chr10:12400015-12403369   | 85  | nogene   |
| chr12:132729678-132730270 | 11  | ANKLE2   |
| chr12:56274776-56282991   | 9   | CS       |
| chr3:56638705-56641752    | 12  | FAM208A  |
| chr4:150896393-150929065  | 97  | LRBA     |

|                           |      |          |
|---------------------------|------|----------|
| chr7:7588497-7596461      | 11   | MIOS     |
| chr7:33635176-33642918    | 14   | nogene   |
| chr11:65436537-65444059   | 29   | nogene   |
| chr12:19320561-19322667   | 3    | PLEKHA5  |
| chr10:13605630-13611683   | 11   | PRPF18   |
| chr1:32825312-32853166    | 34   | S100BPB  |
| chr10:94500220-94511654   | 32   | TBC1D12  |
| chr11:122776218-122783222 | 2    | UBASH3B  |
| chr1:32779381-32782539    | 11   | YARS     |
| chr11:66061685-66061998   | 13   | SF3B2    |
| chr7:2069193-2200557      | 10   | MAD1L1   |
| chr16:29806676-29807422   | 12   | nogene   |
| chr18:58709377-58735329   | 13   | MALT1    |
| chr2:151440026-151446575  | 2    | RIF1     |
| chr3:81670837-81705613    | 89   | GBE1     |
| chr12:132151257-132151820 | 11   | NOC4L    |
| chr20:32366383-32428422   | 4    | ASXL1    |
| chr10:91996368-91997751   | 46   | BTAF1    |
| chr7:40078004-40078851    | 21   | CDK13    |
| chr19:12135774-12147834   | 7    | nogene   |
| chr4:3314790-3343053      | 36   | RGS12    |
| chr8:73292238-73292797    | 15   | RPL7     |
| chr16:30733279-30734615   | 15   | SRCAP    |
| chr4:6994183-7014557      | 42   | TBC1D14  |
| chr1:35370028-35370627    | 17   | ZMYM4    |
| chr16:11896557-11898035   | 34   | GSPT1    |
| chr19:4859589-4860024     | 19   | PLIN3    |
| chr5:138417482-138425582  | 4    | KDM3B    |
| chr3:42184684-42189124    | 20   | TRAK1    |
| chr5:132886309-132893118  | 13   | AFF4     |
| chr12:132735405-132755133 | 2    | ANKLE2   |
| chr11:129062279-129164427 | 9    | ARHGAP32 |
| chr2:215312497-215344871  | 10   | ATIC     |
| chr22:49797804-49799119   | 9    | BRD1     |
| chr9:135881632-135888273  | 29   | CAMSAP1  |
| chr1:180062219-180065272  | 10   | CEP350   |
| chr3:33592394-33644903    | 13   | CLASP2   |
| chr7:43639448-43647634    | 53   | COA1     |
| chr5:94050730-94074769    | 21   | FAM172A  |
| chr2:241434157-241435030  | 4    | FARP2    |
| chr17:67145742-67151224   | 17   | HELZ     |
| chr6:29889327-29943543    | 1260 | HLA-H    |
| chr10:72859176-72868863   | 13   | MCU      |

|                           |     |         |
|---------------------------|-----|---------|
| chr6:89722954-89723619    | 38  | MDN1    |
| chrX:64328771-64359527    | 17  | MTMR8   |
| chr11:67125121-67125522   | 20  | nogene  |
| chr5:141593748-141594268  | 3   | nogene  |
| chr7:23185069-23187146    | 632 | NUPL2   |
| chr1:150460059-150460317  | 9   | RPRD2   |
| chr3:47042560-47067118    | 4   | SETD2   |
| chr2:109329223-109347949  | 56  | SH3RF3  |
| chr15:42638699-42652592   | 6   | STARD9  |
| chr12:63802090-63802405   | 2   | TMEM5   |
| chr12:22478312-22493337   | 37  | C2CD5   |
| chr16:70314901-70316104   | 14  | DDX19B  |
| chr12:50461134-50474167   | 14  | LARP4   |
| chr22:31258290-31260077   | 14  | LIMK2   |
| chr2:20278582-20327378    | 41  | PUM2    |
| chr6:105115685-105133588  | 17  | BVES    |
| chr11:63895158-63895633   | 51  | MARK2   |
| chr10:68959805-68963469   | 15  | DDX21   |
| chr2:47408400-47445657    | 39  | MSH2    |
| chr12:53308051-53320692   | 16  | AAAS    |
| chr2:3497670-3500993      | 14  | ADI1    |
| chr17:82183773-82188419   | 36  | CCDC57  |
| chrX:16689449-16702941    | 12  | CTPS2   |
| chr8:131949968-131955905  | 26  | EFR3A   |
| chr4:140525419-140543586  | 6   | ELMOD2  |
| chr4:2657802-2660054      | 18  | FAM193A |
| chr2:222599927-222624775  | 18  | FARSB   |
| chr18:46118180-46120060   | 18  | HAUS1   |
| chr16:1602369-1602591     | 6   | IFT140  |
| chr11:31456259-31488241   | 16  | IMMP1L  |
| chr7:152194008-152199459  | 10  | KMT2C   |
| chr16:4681549-4683932     | 3   | MGRN1   |
| chr13:23870012-23886506   | 52  | MIPEP   |
| chr20:23381212-23403072   | 3   | NAPB    |
| chr1:247333134-247334426  | 3   | nogene  |
| chr4:2949933-2951245      | 20  | NOP14   |
| chr10:34450316-34470263   | 20  | PARD3   |
| chr4:105396248-105438036  | 63  | PPA2    |
| chr8:22474953-22513432    | 16  | PPP3CC  |
| chr4:82827368-82829058    | 30  | SEC31A  |
| chr1:151658234-151668635  | 102 | SNX27   |
| chr3:67400730-67409034    | 29  | SUCLG2  |
| chr12:103982798-103985728 | 10  | TDG     |

|                           |     |          |
|---------------------------|-----|----------|
| chr16:69366806-69372355   | 13  | TERF2    |
| chr6:52516005-52516737    | 23  | TRAM2    |
| chr1:193069033-193077050  | 10  | TROVE2   |
| chr15:43380083-43383504   | 8   | TUBGCP4  |
| chr1:46309896-46310316    | 23  | UQCRH    |
| chr18:56816030-56880165   | 13  | WDR7     |
| chr19:52373110-52406643   | 14  | ZNF880   |
| chr10:92143028-92145112   | 81  | CPEB3    |
| chr15:41356038-41377304   | 124 | NUSAP1   |
| chr1:35913841-35915542    | 10  | AGO1     |
| chr10:31808648-31814361   | 3   | ARHGAP12 |
| chr7:157339862-157367483  | 3   | DNAJB6   |
| chr1:92693801-92697985    | 12  | EVI5     |
| chr12:122568260-122577029 | 30  | KNTC1    |
| chr18:57611636-57615975   | 46  | NARS     |
| chr3:31830039-31879830    | 5   | OSBPL10  |
| chr7:22492564-22494886    | 10  | STEAP1B  |
| chr17:35817715-35822833   | 8   | TAF15    |
| chr4:84708908-84717016    | 21  | WDFY3    |
| chr2:236120191-236124199  | 29  | AGAP1    |
| chr15:72544819-72572165   | 21  | ARIH1    |
| chr19:32901244-32915517   | 17  | CEP89    |
| chr2:29121373-29192257    | 3   | CLIP4    |
| chr3:197059888-197069260  | 4   | DLG1     |
| chr16:1816892-1820014     | 3   | HAGH     |
| chr19:6936343-6936717     | 4   | nogene   |
| chr12:8920984-8921750     | 11  | PHC1     |
| chr1:112576985-112591603  | 13  | ST7L     |
| chr17:43104121-43115779   | 10  | BRCA1    |
| chr10:27093348-27093799   | 9   | ANKRD26  |
| chr22:17864898-17896981   | 4   | MICAL3   |
| chr1:226152334-226159358  | 12  | ACBD3    |
| chr15:85664562-85693451   | 15  | AKAP13   |
| chr6:157084661-157084905  | 12  | ARID1B   |
| chr2:25799384-25806337    | 168 | ASXL2    |
| chr3:142465096-142470183  | 4   | ATR      |
| chr2:32377587-32406557    | 223 | BIRC6    |
| chr10:59804419-59814755   | 12  | CCDC6    |
| chr3:182947237-182965753  | 26  | DCUN1D1  |
| chrX:131768548-131785258  | 39  | FIRRE    |
| chr17:82563353-82568201   | 839 | FOXK2    |
| chr7:111487237-111521449  | 83  | IMMP2L   |
| chr19:10499394-10500080   | 20  | KEAP1    |

|                           |     |          |
|---------------------------|-----|----------|
| chr17:43810806-43811205   | 3   | MPP3     |
| chr9:122280442-122291840  | 237 | MRRF     |
| chr17:1480526-1480885     | 82  | MYO1C    |
| chr5:85746189-85821466    | 3   | nogene   |
| chrX:56002824-56014961    | 14  | nogene   |
| chr10:78007701-78010540   | 11  | POLR3A   |
| chr8:140803542-140890769  | 3   | PTK2     |
| chr3:50060955-50062108    | 33  | RBM6     |
| chr1:113777209-113777808  | 39  | RSBN1    |
| chr20:44503814-44504891   | 10  | SERINC3  |
| chr10:70844472-70859499   | 14  | SGPL1    |
| chr17:18340042-18347656   | 11  | SHMT1    |
| chr3:125497340-125504744  | 27  | SNX4     |
| chr6:149369908-149379518  | 3   | TAB2     |
| chr3:17508473-17562142    | 5   | TBC1D5   |
| chr3:142736378-142793960  | 7   | TRPC1    |
| chr7:67017852-67018143    | 14  | TYW1     |
| chr12:122263571-122264199 | 8   | VPS33A   |
| chr4:201080-211885        | 5   | ZNF718   |
| chr10:91951402-91953873   | 35  | BTAF1    |
| chr19:40333850-40336407   | 15  | C19orf47 |
| chr1:88857205-88860286    | 9   | GTF2B    |
| chr13:20842894-20868697   | 12  | XPO4     |
| chr13:31229184-31286819   | 14  | B3GLCT   |
| chr18:59438110-59439816   | 26  | CCBE1    |
| chr12:1289851-1371977     | 106 | ERC1     |
| chr6:35637013-35680422    | 7   | FKBP5    |
| chrX:154695916-154700059  | 36  | GAB3     |
| chr19:19492305-19496219   | 10  | GATAD2A  |
| chr10:74838682-74843478   | 166 | KAT6B    |
| chr6:89670918-89673462    | 11  | MDN1     |
| chr10:124408541-124408965 | 26  | OAT      |
| chr20:38531166-38541192   | 12  | RALGAPB  |
| chrX:46651109-46653705    | 55  | SLC9A7   |
| chr7:67024899-67067403    | 5   | TYW1     |
| chr1:193028084-193029657  | 39  | UCHL5    |
| chr19:57861375-57862570   | 15  | nogene   |
| chr15:90766909-90769586   | 32  | BLM      |
| chr19:4422565-4433539     | 12  | CHAF1A   |
| chr6:42934474-42935670    | 179 | CNPY3    |
| chr1:173830659-173853905  | 13  | DARS2    |
| chr5:73051348-73068779    | 23  | FCHO2    |
| chr12:123194385-123198334 | 13  | MPHOSPH9 |

|                          |     |           |
|--------------------------|-----|-----------|
| chr7:596145-607452       | 12  | PRKAR1B   |
| chr2:68137298-68141795   | 38  | WDR92     |
| chr8:140585118-140605914 | 208 | AGO2      |
| chr5:78216054-78267595   | 7   | AP3B1     |
| chr6:80200933-80273221   | 4   | BCKDHB    |
| chr2:58163433-58165874   | 5   | FANCL     |
| chrX:72462003-72474729   | 9   | HDAC8     |
| chr15:40386361-40392023  | 9   | KNSTRN    |
| chr7:130984052-130988888 | 3   | LINC-PINT |
| chr14:70742350-70742591  | 18  | MAP3K9    |
| chr10:46014443-46016694  | 54  | NCOA4     |
| chr3:72708843-72716617   | 23  | nogene    |
| chr3:151795738-151803925 | 68  | nogene    |
| chr3:127003329-127007913 | 11  | PLXNA1    |
| chr18:9512990-9513289    | 15  | RALBP1    |
| chr16:53439015-53451831  | 4   | RBL2      |
| chr6:107911345-107924932 | 8   | SEC63     |
| chr10:10786644-10792525  | 10  | SFTA1P    |
| chr17:64578491-64606640  | 7   | SMURF2    |
| chr16:68867078-68880630  | 48  | TANGO6    |
| chr16:69370482-69372355  | 332 | TERF2     |
| chr1:185124943-185137796 | 12  | TRMT1L    |
| chr15:43007078-43025429  | 15  | UBR1      |
| chr8:17265906-17268956   | 81  | VPS37A    |
| chr10:86451966-86461287  | 24  | WAPL      |
| chr4:84849901-84879494   | 12  | WDFY3     |
| chr13:26349071-26353880  | 7   | CDK8      |
| chrX:44524001-44527365   | 325 | FUNDC1    |
| chr5:135343259-135346057 | 5   | H2AFY     |
| chr9:38544746-38545185   | 7   | nogene    |
| chr5:143054438-143057747 | 53  | ARHGAP26  |
| chr11:47484388-47489024  | 31  | CELF1     |
| chr7:139715931-139726108 | 18  | HIPK2     |
| chr3:56565637-56567053   | 41  | CCDC66    |
| chr19:10772478-10777216  | 45  | DNM2      |
| chr1:20893516-20942330   | 29  | EIF4G3    |
| chr1:240329075-240330749 | 21  | FMN2      |
| chr12:42393569-42398994  | 46  | PPHLN1    |
| chr4:4648976-4653757     | 7   | STX18-AS1 |
| chr5:72861807-72875737   | 13  | TNPO1     |
| chr4:75806485-75812375   | 11  | USO1      |
| chr12:22474750-22484888  | 9   | C2CD5     |
| chr18:49272177-49286616  | 12  | DYM       |

|                           |      |         |
|---------------------------|------|---------|
| chr1:219972068-219978719  | 17   | EPRS    |
| chr18:26476514-26501250   | 9    | KCTD1   |
| chr7:67297216-67299424    | 3    | PMS2P4  |
| chr11:70343668-70348420   | 8    | PPFIA1  |
| chr9:100240059-100253136  | 4    | INVS    |
| chr14:45006007-45025872   | 16   | FAM179B |
| chrX:50042315-50048103    | 11   | CLCN5   |
| chr14:52860340-52864853   | 3    | FERMT2  |
| chr12:2880260-2880674     | 13   | nogene  |
| chr3:27418485-27452498    | 28   | SLC4A7  |
| chr7:152783186-152801731  | 280  | ACTR3B  |
| chr2:29121373-29145367    | 23   | CLIP4   |
| chr11:103219914-103223086 | 49   | DYNC2H1 |
| chr5:154376276-154380631  | 6    | GALNT10 |
| chr1:219193081-219241308  | 64   | LYPLAL1 |
| chr17:76738281-76776541   | 17   | MFSD11  |
| chr20:43686851-43700044   | 29   | MYBL2   |
| chr4:88061905-88065879    | 49   | PKD2    |
| chr11:77725544-77747128   | 19   | RSF1    |
| chr20:4902441-4932716     | 9    | SLC23A2 |
| chr7:105638352-105643121  | 28   | ATXN7L1 |
| chr22:27894554-27897892   | 30   | PITPNB  |
| chr7:66423378-66423796    | 47   | nogene  |
| chr2:172564502-172596023  | 11   | PDK1    |
| chr5:50399106-50428227    | 3    | EMB     |
| chr2:196656632-196701180  | 10   | CCDC150 |
| chr12:26628032-26655852   | 32   | ITPR2   |
| chr6:89803327-89803554    | 11   | MDN1    |
| chr9:36580072-36583712    | 16   | MELK    |
| chr16:69119754-69119913   | 36   | nogene  |
| chr3:27381867-27382359    | 14   | nogene  |
| chr20:35714184-35725155   | 1043 | RBM39   |
| chr2:226906792-226914351  | 383  | RHBDD1  |
| chr1:23694659-23697445    | 2    | RPL11   |
| chr9:128345154-128345549  | 3    | SLC27A4 |
| chr3:41681507-41717861    | 4    | ULK4    |
| chr10:12209966-12238485   | 9    | CDC123  |
| chr7:32974616-32988652    | 6    | FKBP9   |
| chr19:726137-727694       | 4    | PALM    |
| chr16:66528993-66549009   | 4    | TK2     |
| chr2:203366876-203402734  | 10   | ABI2    |
| chr18:50895808-50940386   | 10   | ME2     |
| chr3:146079115-146091901  | 9    | PLOD2   |



|                           |     |          |
|---------------------------|-----|----------|
| chr5:177537872-177539147  | 20  | FAM193B  |
| chr3:47729024-47745993    | 19  | SMARCC1  |
| chr14:51698141-51702588   | 24  | FRMD6    |
| chrX:118741016-118766976  | 10  | IL13RA1  |
| chr6:43498974-43503706    | 3   | TJAP1    |
| chr12:26996741-27003390   | 3   | TM7SF3   |
| chr11:120476660-120477526 | 56  | ARHGEF12 |
| chr14:55181212-55183753   | 34  | DLGAP5   |
| chr7:42023467-42026412    | 28  | GLI3     |
| chr11:62824165-62825117   | 10  | STX5     |
| chr1:35816881-35835993    | 3   | AGO4     |
| chr5:126546323-126552137  | 11  | ALDH7A1  |
| chr1:20969473-20980448    | 30  | EIF4G3   |
| chr7:2794927-2814389      | 5   | GNA12    |
| chr1:100067976-100068586  | 3   | HIAT1    |
| chrX:149490313-149501037  | 9   | IDS      |
| chr7:152202933-152207428  | 9   | KMT2C    |
| chr3:25751097-25778688    | 15  | NGLY1    |
| chr7:154975695-154998784  | 9   | PAXIP1   |
| chr8:42344952-42352568    | 43  | POLB     |
| chr1:112576985-112616844  | 13  | ST7L     |
| chr15:42958012-42970607   | 40  | UBR1     |
| chr10:130159994-130180321 | 18  | GLRX3    |
| chr1:94455732-94468007    | 17  | ABCD3    |
| chr15:77364073-77365225   | 5   | nogene   |
| chr3:194459470-194462236  | 211 | ATP13A3  |
| chr5:112259228-112266330  | 24  | EPB41L4A |
| chr1:236594011-236596976  | 24  | HEATR1   |
| chr10:132690391-132726905 | 19  | INPP5A   |
| chr1:246540937-246556721  | 10  | TFB2M    |
| chr15:50631416-50634556   | 6   | TRPM7    |
| chr14:88726540-88754671   | 80  | EML5     |
| chr19:50061799-50067800   | 5   | FLJ26850 |
| chr1:213071005-213117410  | 43  | RPS6KC1  |
| chr7:100075134-100075630  | 9   | ZNF3     |
| chr1:109340723-109345878  | 26  | SORT1    |
| chr1:243637610-243664883  | 7   | AKT3     |
| chr5:179841906-179851424  | 5   | C5orf45  |
| chr15:90598449-90600441   | 4   | nogene   |
| chr15:34927034-34934635   | 3   | AQR      |
| chr1:150823193-150826617  | 5   | ARNT     |
| chr3:194427074-194427252  | 31  | ATP13A3  |
| chr17:61743012-61808757   | 11  | BRIP1    |

|                           |     |          |
|---------------------------|-----|----------|
| chr21:32603160-32610005   | 5   | C21orf59 |
| chr22:31784813-31798656   | 10  | DEPDC5   |
| chr19:32432715-32437339   | 11  | DPY19L3  |
| chr1:97549559-97595166    | 16  | DPYD     |
| chr8:116726015-116755797  | 10  | EIF3H    |
| chr20:46380252-46389220   | 10  | ELMO2    |
| chr22:41125863-41127748   | 31  | EP300    |
| chr1:240333886-240355908  | 5   | FMN2     |
| chr10:119430374-119455246 | 10  | GRK5     |
| chrX:72462003-72489041    | 26  | HDAC8    |
| chr10:68025545-68067217   | 35  | HERC4    |
| chr1:153665219-153668557  | 174 | ILF2     |
| chr7:66638252-66643611    | 6   | KCTD7    |
| chr2:20739970-20790398    | 11  | LDAH     |
| chr2:43960540-43975217    | 17  | LRPPRC   |
| chr5:109713495-109729513  | 12  | MAN2A1   |
| chrX:136219397-136222486  | 4   | MAP7D3   |
| chr5:80775693-80792844    | 282 | MSH3     |
| chr8:96243918-96258700    | 17  | MTERF3   |
| chr13:77205255-77243951   | 17  | MYCBP2   |
| chr12:78159202-78168866   | 6   | NAV3     |
| chr18:79433578-79467582   | 10  | NFATC1   |
| chr9:97135545-97139954    | 32  | nogene   |
| chr20:37307182-37307537   | 50  | nogene   |
| chr7:106371655-106372442  | 11  | nogene   |
| chr10:89335016-89335534   | 4   | nogene   |
| chr9:2690950-2782846      | 20  | nogene   |
| chr19:51839892-51843315   | 2   | nogene   |
| chr5:179831569-179831878  | 62  | nogene   |
| chr22:32268287-32273507   | 34  | nogene   |
| chrX:71555953-71557672    | 51  | OGT      |
| chr4:39902346-39925933    | 27  | PDS5A    |
| chr3:48782985-48794049    | 8   | PRKAR2A  |
| chr9:133410984-133412921  | 10  | REXO4    |
| chr11:71982806-71990717   | 27  | RNF121   |
| chr1:185087551-185091739  | 9   | RNF2     |
| chr20:36904156-36905503   | 10  | SAMHD1   |
| chr6:154808069-154824378  | 10  | SCAF8    |
| chr2:109567814-109585838  | 42  | 10-Sep   |
| chr1:206205428-206206037  | 8   | SRGAP2   |
| chr12:112130510-112135066 | 42  | TRAFD1   |
| chr11:11873799-11880380   | 12  | USP47    |
| chr17:4081375-4086655     | 33  | ZZEF1    |

|                           |     |          |
|---------------------------|-----|----------|
| chr5:65242103-65291470    | 40  | ADAMTS6  |
| chr18:23561359-23572180   | 15  | NPC1     |
| chr13:32325075-32326613   | 38  | BRCA2    |
| chr17:39490556-39492890   | 54  | CDK12    |
| chr6:4935514-4937737      | 10  | CDYL     |
| chr9:137743370-137762820  | 14  | EHMT1    |
| chr10:97437190-97438703   | 12  | EXOSC1   |
| chr16:56758537-56805632   | 5   | NUP93    |
| chr3:58431592-58431984    | 6   | PDHB     |
| chr4:102799406-102826636  | 17  | UBE2D3   |
| chr7:157183877-157201807  | 12  | UBE3C    |
| chr6:31784213-31785733    | 11  | VARS     |
| chr4:36210389-36214480    | 54  | ARAP2    |
| chr10:121902390-121922411 | 16  | ATE1     |
| chr19:47352753-47362693   | 77  | DHX34    |
| chr2:27350313-27350632    | 315 | GTF3C2   |
| chr7:98244570-98246165    | 4   | TECPR1   |
| chr2:135335399-135345635  | 16  | ZRANB3   |
| chr2:231206197-231226798  | 6   | ARMC9    |
| chr16:70361417-70365131   | 3   | DDX19A   |
| chr7:6581606-6582251      | 12  | ZDHHC4   |
| chr15:72007825-72046634   | 13  | MYO9A    |
| chr14:103669510-103673431 | 23  | KLC1     |
| chr7:103025062-103047020  | 11  | FBXL13   |
| chr22:29137341-29142100   | 12  | KREMEN1  |
| chr10:119857346-119859884 | 20  | MCMBP    |
| chr1:45614095-45616393    | 48  | NASP     |
| chr10:34470084-34517159   | 37  | PARD3    |
| chr11:34957383-34980503   | 12  | PDHX     |
| chr4:13376544-13425227    | 12  | RAB28    |
| chrX:107088435-107088839  | 348 | RBM41    |
| chr3:195688532-195689438  | 188 | SDHAP2   |
| chr7:96184276-96208977    | 4   | SLC25A13 |
| chr3:67609454-67637839    | 11  | SUCLG2   |
| chr4:147879231-147881932  | 82  | ARHGAP10 |
| chr5:74840073-74841679    | 61  | FAM169A  |
| chr15:71978170-72010447   | 12  | MYO9A    |
| chrX:17687741-17692468    | 55  | NHS      |
| chr10:47501279-47501514   | 13  | nogene   |
| chrX:68096869-68113239    | 14  | OPHN1    |
| chr3:171642839-171677694  | 3   | PLD1     |
| chr19:47150201-47153040   | 4   | SAE1     |
| chr9:77238001-77260224    | 3   | VPS13A   |

|                           |     |          |
|---------------------------|-----|----------|
| chr12:76805316-76809857   | 6   | ZDHHC17  |
| chr7:99333324-99344515    | 19  | ARPC1A   |
| chr15:34003031-34003209   | 4   | AVEN     |
| chr14:88657375-88665489   | 12  | EML5     |
| chr19:43506722-43508060   | 16  | ETHE1    |
| chr9:93527154-93532329    | 14  | FAM120A  |
| chr1:16305802-16315435    | 63  | FBXO42   |
| chr7:5603256-5604030      | 18  | FSCN1    |
| chr14:66965190-67023675   | 12  | GPHN     |
| chr14:55648024-55651927   | 17  | KTN1     |
| chr10:124462502-124462962 | 17  | nogene   |
| chr3:196061801-196062273  | 24  | nogene   |
| chr2:10787280-10793202    | 4   | PDIA6    |
| chr3:170136418-170145521  | 34  | PHC3     |
| chr18:9588088-9595102     | 47  | PPP4R1   |
| chr3:45703437-45723543    | 3   | SACM1L   |
| chr14:54736675-54737287   | 17  | SAMD4A   |
| chr2:200532973-200536142  | 18  | SGOL2    |
| chr7:56068481-56073111    | 23  | SUMF2    |
| chr19:49342437-49360081   | 39  | TEAD2    |
| chr6:44134560-44141098    | 17  | TMEM63B  |
| chr15:42827927-42830078   | 11  | TTBK2    |
| chr1:28742402-28743986    | 124 | YTHDF2   |
| chr8:80499493-80500382    | 47  | ZBTB10   |
| chr22:28724976-28734727   | 13  | CHEK2    |
| chr7:5528003-5528406      | 10  | ACTB     |
| chr15:60355918-60364523   | 33  | ANXA2    |
| chr11:43326506-43335994   | 139 | API5     |
| chr8:123356388-123361646  | 75  | ATAD2    |
| chr3:113778740-113786383  | 28  | ATP6V1A  |
| chr10:118729294-118730410 | 298 | CACUL1   |
| chr9:97347313-97350555    | 28  | CCDC180  |
| chr16:69155870-69168998   | 40  | CIRH1A   |
| chr3:41224020-41236709    | 4   | CTNNB1   |
| chr5:112262493-112280323  | 16  | EPB41L4A |
| chr9:95897848-95941549    | 12  | ERCC6L2  |
| chr1:42265114-42323827    | 103 | FOXJ3    |
| chr1:1806474-1825499      | 30  | GNB1     |
| chr21:33781460-33782133   | 11  | ITSN1    |
| chr4:165228806-165263359  | 11  | KLHL2    |
| chrX:150445453-150471490  | 11  | MAMLD1   |
| chr21:36333645-36341546   | 4   | MORC3    |
| chr1:156132377-156132934  | 9   | nogene   |

|                           |     |           |
|---------------------------|-----|-----------|
| chr5:37061586-37061936    | 14  | nogene    |
| chr11:65503853-65504595   | 8   | nogene    |
| chr7:135576968-135578915  | 9   | NUP205    |
| chr10:91240483-91271697   | 2   | PCGF5     |
| chr10:27532506-27533994   | 118 | RAB18     |
| chr7:85036888-85042285    | 9   | SEMA3D    |
| chr7:140334633-140337349  | 41  | SLC37A3   |
| chr17:81260237-81284895   | 12  | SLC38A10  |
| chr19:11033289-11060187   | 9   | SMARCA4   |
| chr17:20245925-20257607   | 9   | SPECC1    |
| chr10:14896845-14897517   | 35  | SUV39H2   |
| chr2:171053760-171082852  | 20  | TLK1      |
| chr11:87067693-87071615   | 16  | TMEM135   |
| chr7:139273296-139274074  | 6   | UBN2      |
| chr3:108191520-108214021  | 12  | IFT57     |
| chr16:14079289-14140760   | 21  | MKL2      |
| chr19:13912322-13913638   | 18  | CC2D1A    |
| chr7:6416626-6421804      | 3   | DAGLB     |
| chr8:131949968-131959663  | 9   | EFR3A     |
| chr8:100715461-100718280  | 13  | PABPC1    |
| chr16:47463881-47503090   | 4   | PHKB      |
| chr17:20253504-20260294   | 43  | SPECC1    |
| chr8:25298943-25300657    | 32  | DOCK5     |
| chr11:77978995-77991299   | 12  | INTS4     |
| chr16:48256609-48277479   | 130 | LONP2     |
| chr7:24649611-24650712    | 33  | MPP6      |
| chr12:111702161-111709684 | 2   | ACAD10    |
| chr5:135052453-135075388  | 17  | C5orf66   |
| chr14:45008912-45032376   | 6   | FAM179B   |
| chr9:85815878-85823080    | 19  | LOC389765 |
| chr4:102714437-102736435  | 13  | MANBA     |
| chr9:81654639-81655118    | 2   | nogene    |
| chr14:30715923-30722559   | 16  | SCFD1     |
| chr11:66063627-66068333   | 9   | SF3B2     |
| chr10:94441895-94493447   | 3   | TBC1D12   |
| chr3:12489783-12492217    | 12  | TSEN2     |
| chr17:81588943-81608822   | 7   | NPLOC4    |
| chr2:25767582-25806337    | 10  | ASXL2     |
| chr22:28719394-28734727   | 19  | CHEK2     |
| chr12:108652271-108662158 | 13  | CORO1C    |
| chr7:156826604-156836885  | 224 | LMBR1     |
| chr6:89781398-89790401    | 6   | MDN1      |
| chr16:56818663-56823846   | 18  | NUP93     |

|                           |     |          |
|---------------------------|-----|----------|
| chr19:46375603-46376574   | 18  | PPP5C    |
| chr19:10328641-10330526   | 18  | RAVER1   |
| chr13:46020448-46045516   | 10  | ZC3H13   |
| chr13:100257594-100273346 | 174 | PCCA     |
| chr19:7458511-7459994     | 5   | ARHGEF18 |
| chr10:68459103-68470163   | 401 | DNA2     |
| chr9:96918642-96942752    | 87  | nogene   |
| chr7:128982247-128997535  | 5   | TNPO3    |
| chr9:95966561-95978215    | 23  | ERCC6L2  |
| chr2:171976156-171979363  | 5   | HAT1     |
| chr7:919967-926644        | 16  | ADAP1    |
| chr7:140794307-140808995  | 92  | BRAF     |
| chr3:128637798-128644983  | 32  | RPN1     |
| chr2:23819746-23823569    | 14  | ATAD2B   |
| chr5:69294792-69311204    | 93  | CCDC125  |
| chr12:121416158-121420778 | 15  | RNF34    |
| chr17:82903404-82909307   | 18  | TBCD     |
| chr16:47497398-47610920   | 47  | PHKB     |
| chr1:26447558-26460144    | 24  | DHDDS    |
| chr15:63764095-63775649   | 15  | HERC1    |
| chr1:83947123-83952387    | 3   | TTLL7    |
| chr10:121836717-121841263 | 6   | ATE1     |
| chr8:102834188-102836390  | 47  | AZIN1    |
| chrX:1288518-1288888      | 31  | CSF2RA   |
| chr18:48757918-48761689   | 23  | CTIF     |
| chr3:129458598-129464781  | 10  | IFT122   |
| chr6:111262256-111263946  | 166 | KIAA1919 |
| chr21:36338774-36344707   | 313 | MORC3    |
| chr10:68121437-68135512   | 3   | MYPN     |
| chr2:152085567-152086011  | 31  | nogene   |
| chr14:22833885-22834553   | 16  | nogene   |
| chr15:25266430-25278884   | 12  | nogene   |
| chr17:42380685-42381464   | 2   | nogene   |
| chr1:6533279-6549698      | 21  | NOL9     |
| chr7:82822494-82841509    | 16  | PCLO     |
| chr8:140818276-140830526  | 109 | PTK2     |
| chr1:31910037-31911826    | 106 | PTP4A2   |
| chr1:52978216-52988136    | 11  | SCP2     |
| chr3:123209198-123259589  | 27  | SEC22A   |
| chr17:38361710-38368050   | 135 | SOCS7    |
| chr17:78092932-78093763   | 2   | TNRC6C   |
| chr19:43988458-43991934   | 11  | ZNF155   |
| chr7:149074385-149080717  | 11  | ZNF786   |

|                           |     |          |
|---------------------------|-----|----------|
| chr2:31917925-31932135    | 837 | MEMO1    |
| chr5:172382035-172406352  | 12  | SH3PXD2B |
| chr1:59321535-59378837    | 80  | FGGY     |
| chr2:36578596-36591011    | 196 | FEZ2     |
| chr5:80174953-80178064    | 10  | SERINC5  |
| chr16:50354424-50354922   | 2   | BRD7     |
| chr11:95812931-95813589   | 215 | CEP57    |
| chr7:111808820-111834686  | 13  | DOCK4    |
| chr12:122584277-122588816 | 37  | KNTC1    |
| chr14:54702061-54751537   | 12  | SAMD4A   |
| chr11:70798442-70820682   | 21  | SHANK2   |
| chr5:128148753-128161800  | 2   | SLC12A2  |
| chr7:857827-872562        | 2   | SUN1     |
| chr14:102376649-102408619 | 13  | TECPR2   |
| chr1:154170399-154173201  | 38  | TPM3     |
| chr12:49325500-49329454   | 13  | TROAP    |
| chr2:25799384-25856839    | 2   | ASXL2    |
| chr10:32048463-32050523   | 13  | KIF5B    |
| chrX:77688817-77717243    | 10  | ATRX     |
| chr4:76144148-76144473    | 153 | NUP54    |
| chr1:51745535-51761971    | 4   | OSBPL9   |
| chr11:20452129-20464546   | 21  | PRMT3    |
| chr7:129205202-129206587  | 939 | SMO      |
| chr3:12496517-12519197    | 4   | TSEN2    |
| chr16:11774235-11782388   | 25  | ZC3H7A   |
| chr2:69530007-69532162    | 14  | AAK1     |
| chr3:43549719-43580472    | 8   | ANO10    |
| chr19:17271596-17275825   | 13  | BABAM1   |
| chr5:96722638-96729725    | 20  | CAST     |
| chr2:55308808-55309254    | 21  | CCDC88A  |
| chr19:12928341-12928936   | 12  | FARSA    |
| chr10:67966682-68025676   | 15  | HERC4    |
| chr4:127921523-127939997  | 61  | MFSD8    |
| chr15:48165932-48168839   | 15  | MYEF2    |
| chr11:17356650-17379665   | 10  | NCR3LG1  |
| chr1:28476106-28480604    | 17  | PHACTR4  |
| chr20:62139780-62140944   | 15  | PSMA7    |
| chr1:24514313-24533254    | 5   | RCAN3    |
| chr5:115130591-115137616  | 41  | TRIM36   |
| chr7:67024899-67055887    | 17  | TYW1     |
| chr1:179112308-179117516  | 19  | ABL2     |
| chrX:109674401-109678415  | 4   | ACSL4    |
| chr2:113913171-113942359  | 16  | ACTR3    |

|                           |      |           |
|---------------------------|------|-----------|
| chrX:85046445-85074391    | 5    | APOOL     |
| chr11:47166267-47168251   | 38   | ARFGAP2   |
| chr2:9279316-9323250      | 19   | ASAP2     |
| chr3:194425341-194431892  | 10   | ATP13A3   |
| chr15:34003031-34023497   | 35   | AVEN      |
| chr14:60149352-60153178   | 27   | DHRS7     |
| chr9:129978464-129979374  | 5    | FNBP1     |
| chr1:155756957-155760641  | 6    | GON4L     |
| chr11:33286412-33328633   | 60   | HIPK3     |
| chr19:18175039-18175697   | 195  | IFI30     |
| chr2:210129030-210155404  | 3    | KANSL1L   |
| chr12:350620-356537       | 30   | KDM5A     |
| chr15:69417382-69422435   | 37   | KIF23     |
| chr7:152229922-152238826  | 139  | KMT2C     |
| chr12:122601535-122624688 | 9    | KNTC1     |
| chr1:117442230-117466427  | 77   | MAN1A2    |
| chr1:117402185-117420649  | 2575 | MAN1A2    |
| chr3:47867245-47877523    | 11   | MAP4      |
| chr22:40519463-40552367   | 7    | MKL1      |
| chr8:65669872-65704929    | 16   | MTFR1     |
| chr3:172645622-172648114  | 297  | NCEH1     |
| chr1:236032400-236038253  | 18   | NID1      |
| chr20:63910450-63910767   | 37   | nogene    |
| chr19:31228004-31232280   | 7    | nogene    |
| chr2:130066454-130067902  | 4    | nogene    |
| chrX:65352872-65368998    | 17   | nogene    |
| chr5:172259407-172259810  | 16   | nogene    |
| chr17:81610209-81629805   | 7    | NPLOC4    |
| chr5:43543003-43547913    | 12   | PAIP1     |
| chr7:140034234-140047007  | 13   | PARP12    |
| chr3:196716857-196728136  | 10   | PIGX      |
| chr5:149836262-149845914  | 6    | PPARGC1B  |
| chr14:58285590-58291707   | 11   | PSMA3-AS1 |
| chr17:67342185-67344780   | 6    | PSMD12    |
| chr4:26386352-26424743    | 21   | RBPJ      |
| chr7:832504-843232        | 12   | SUN1      |
| chr3:119503531-119513719  | 7    | TIMMDC1   |
| chr5:88220589-88228528    | 38   | TMEM161B  |
| chr5:14405847-14420021    | 277  | TRIO      |
| chr15:42817031-42830078   | 10   | TTBK2     |
| chr1:230943805-230961303  | 185  | TTC13     |
| chr7:139258487-139266403  | 11   | UBN2      |
| chr1:77734346-77739417    | 16   | USP33     |



|                           |     |              |
|---------------------------|-----|--------------|
| chr10:73504849-73505426   | 17  | USP54        |
| chr2:144424795-144517419  | 13  | ZEB2         |
| chr13:77243058-77264002   | 11  | MYCBP2       |
| chr3:57871635-57896932    | 14  | SLMAP        |
| chr5:65291328-65300131    | 27  | ADAMTS6      |
| chr9:19423861-19424841    | 6   | ACER2        |
| chr3:198019252-198024788  | 6   | LMLN         |
| chr1:17580552-17588479    | 141 | ARHGEF10L    |
| chr17:47585499-47590881   | 7   | NPEPPS       |
| chr12:98597855-98598703   | 13  | SLC25A3      |
| chr6:135318518-135346796  | 30  | AHI1         |
| chr1:70292387-70315566    | 527 | ANKRD13C     |
| chr15:40628069-40650819   | 23  | CASC5        |
| chr15:65729071-65738875   | 19  | DENND4A      |
| chr8:116726015-116734354  | 10  | EIF3H        |
| chr1:20941490-20942330    | 7   | EIF4G3       |
| chr2:31891991-31932135    | 151 | MEMO1        |
| chr6:43671839-43675617    | 4   | MRPS18A      |
| chr16:48546146-48562444   | 20  | N4BP1        |
| chr14:74119855-74120164   | 10  | nogene       |
| chr4:730629-744688        | 10  | PCGF3        |
| chr22:46235132-46235509   | 4   | PPARA        |
| chr18:8624937-8635622     | 14  | RAB12        |
| chr3:134183001-134191974  | 11  | RYK          |
| chr19:38119305-38119882   | 81  | SIPA1L3      |
| chr11:62881892-62888218   | 5   | SLC3A2       |
| chr7:127698874-127721400  | 5   | SND1         |
| chr6:35888023-35891013    | 30  | SRPK1        |
| chr20:49135832-49144649   | 3   | STAU1        |
| chr12:6869257-6870136     | 19  | TPI1         |
| chr5:14290715-14330900    | 11  | TRIO         |
| chr1:32184524-32188124    | 39  | TXLNA        |
| chr9:33986759-34017189    | 62  | UBAP2        |
| chr3:114350273-114351878  | 77  | ZBTB20       |
| chr19:9658008-9660874     | 7   | ZNF562       |
| chr20:24969525-24973737   | 14  | APMAP        |
| chr15:55376948-55389433   | 3   | DYX1C1-CCPG1 |
| chr10:119107947-119132609 | 13  | FAM45A       |
| chr9:96458378-96484633    | 42  | HABP4        |
| chr15:20461191-20466370   | 34  | HERC2P3      |
| chr2:131125752-131130760  | 20  | PLEKHB2      |
| chr13:19741564-19751467   | 10  | PSPC1        |
| chr6:138941334-138947913  | 64  | REPS1        |

|                           |     |           |
|---------------------------|-----|-----------|
| chr15:41475524-41477515   | 12  | RTF1      |
| chr2:168129540-168140758  | 125 | STK39     |
| chr17:42613646-42663503   | 18  | TUBG1     |
| chr16:74915869-74916259   | 17  | WDR59     |
| chr20:41202056-41205066   | 16  | ZHX3      |
| chr16:89100661-89102759   | 27  | ACSF3     |
| chr13:48253807-48261321   | 12  | ITM2B     |
| chr8:22196679-22197420    | 3   | BMP1      |
| chrX:91562992-91661744    | 3   | nogene    |
| chr1:173751763-173757159  | 34  | KLHL20    |
| chr11:118581245-118584644 | 46  | ARCN1     |
| chr22:46386401-46389499   | 27  | CELSR1    |
| chr11:68780639-68785010   | 5   | CPT1A     |
| chr19:45093083-45093527   | 3   | PPP1R37   |
| chr8:42436988-42437577    | 20  | SLC20A2   |
| chr13:32362522-32363533   | 17  | BRCA2     |
| chr1:247860616-247876037  | 14  | TRIM58    |
| chr17:46082440-46094701   | 204 | KANSL1    |
| chr5:108883395-108959347  | 36  | FER       |
| chr20:3281640-3287790     | 10  | C20orf194 |
| chr14:50456515-50486194   | 10  | MAP4K5    |
| chr11:119124029-119125460 | 10  | nogene    |
| chr19:43155171-43182918   | 10  | nogene    |
| chr3:146102754-146124229  | 216 | PLOD2     |
| chr5:149835300-149845914  | 10  | PPARGC1B  |
| chr9:124971369-124971844  | 3   | SCAI      |
| chr20:13587249-13630152   | 11  | TASP1     |
| chr2:43428099-43485325    | 5   | THADA     |
| chr5:168453967-168460742  | 16  | WWC1      |
| chr3:98768429-98773983    | 95  | ST3GAL6   |
| chr12:10709907-10710788   | 13  | YBX3      |
| chr5:126582850-126593404  | 4   | ALDH7A1   |
| chr4:1228198-1241519      | 223 | CTBP1     |
| chr2:69348170-69363670    | 27  | GFPT1     |
| chrX:77829030-77830895    | 15  | MAGT1     |
| chr9:13247634-13250372    | 18  | MPDZ      |
| chr1:9726908-9727772      | 10  | PIK3CD    |
| chr9:26928099-26935206    | 3   | PLAA      |
| chr14:22926132-22926814   | 214 | PRMT5     |
| chr16:74300114-74304394   | 3   | PSMD7     |
| chr1:156265780-156274686  | 15  | SMG5      |
| chr2:128170287-128171284  | 15  | UGGT1     |
| chr17:51217333-51225209   | 103 | MBTD1     |

|                           |     |           |
|---------------------------|-----|-----------|
| chr1:70292387-70300908    | 37  | ANKRD13C  |
| chr17:8161472-8162369     | 7   | VAMP2     |
| chr10:114830851-114836246 | 24  | FAM160B1  |
| chr15:50300788-50303123   | 11  | GABPB1    |
| chr16:15691143-15696860   | 10  | NDE1      |
| chr5:87332506-87346724    | 10  | RASA1     |
| chr1:28571175-28571900    | 25  | TRNAU1AP  |
| chr3:104630284-104630579  | 27  | nogene    |
| chrX:139757807-139774953  | 18  | ATP11C    |
| chr17:61074919-61084564   | 89  | BCAS3     |
| chr15:76287845-76295737   | 6   | ETFA      |
| chr2:239156651-239163923  | 53  | HDAC4     |
| chr1:220136808-220139139  | 9   | IARS2     |
| chrX:70329404-70333689    | 21  | KIF4A     |
| chrX:129540743-129588263  | 6   | OCRL      |
| chr2:147972738-147975975  | 468 | ORC4      |
| chr2:196870940-196873758  | 4   | PGAP1     |
| chr2:20297552-20333063    | 20  | PUM2      |
| chr17:82756164-82797802   | 10  | TBCD      |
| chr3:51463113-51496780    | 10  | VPRBP     |
| chr13:52416016-52427219   | 2   | VPS36     |
| chr12:51073822-51076647   | 31  | CSRNP2    |
| chr4:41598919-41619440    | 13  | LIMCH1    |
| chr10:4830674-4889923     | 6   | AKR1E2    |
| chr11:108267170-108268609 | 31  | ATM       |
| chr15:81127589-81143820   | 10  | C15orf26  |
| chr12:22482556-22506819   | 19  | C2CD5     |
| chr22:46308149-46308943   | 14  | GTSE1     |
| chr2:37056439-37057480    | 9   | HEATR5B   |
| chr9:125238140-125239533  | 10  | HSPA5     |
| chr1:117402185-117466427  | 153 | MAN1A2    |
| chr2:171325840-171331867  | 32  | METTL8    |
| chr4:103547853-103593429  | 20  | nogene    |
| chr12:6882195-6883919     | 46  | nogene    |
| chrX:27158904-27176384    | 27  | nogene    |
| chr15:96191351-96201643   | 4   | NR2F2-AS1 |
| chr10:45888164-45962994   | 28  | PARGP1    |
| chr7:154983218-154998784  | 90  | PAXIP1    |
| chr11:68544837-68571104   | 4   | PPP6R3    |
| chr9:69723325-69741858    | 9   | PTAR1     |
| chr10:70152262-70161069   | 14  | SAR1A     |
| chr3:112563384-112570670  | 3   | SLC35A5   |
| chr1:47295764-47301748    | 140 | STIL      |

|                           |     |           |
|---------------------------|-----|-----------|
| chr9:6420911-6465846      | 14  | UHRF2     |
| chr14:55010308-55013596   | 6   | WDHD1     |
| chr1:100995109-101025466  | 16  | DPH5      |
| chr7:4989062-5005228      | 12  | RNF216P1  |
| chr10:121790168-121841263 | 3   | ATE1      |
| chr7:16665436-16674588    | 16  | BZW2      |
| chr16:53303719-53306397   | 24  | CHD9      |
| chr14:45025782-45028329   | 21  | FAM179B   |
| chr11:93788000-93790793   | 15  | MED17     |
| chr6:88844356-88904955    | 25  | RNGTT     |
| chr2:61325374-61333971    | 6   | USP34     |
| chr9:86308428-86310017    | 8   | ZCCHC6    |
| chr15:44484223-44486700   | 46  | CTDSPL2   |
| chr5:618989-644425        | 11  | CEP72     |
| chr15:63526919-63537156   | 6   | USP3      |
| chr1:1825396-1853297      | 6   | GNB1      |
| chr19:17101659-17102557   | 320 | MYO9B     |
| chr6:35619095-35680422    | 34  | FKBP5     |
| chr14:57274243-57280422   | 10  | AP5M1     |
| chr6:129583987-129618852  | 17  | ARHGAP18  |
| chr2:175111567-175114868  | 4   | ATF2      |
| chr2:61162841-61164540    | 161 | C2orf74   |
| chr3:15230441-15233973    | 13  | CAPN7     |
| chr20:5173522-5175279     | 13  | CDS2      |
| chr1:114725220-114738072  | 12  | CSDE1     |
| chr2:224535527-224567111  | 13  | CUL3      |
| chr5:151790322-151794249  | 6   | G3BP1     |
| chr6:2263600-2273417      | 27  | GMDS-AS1  |
| chr7:23140768-23144025    | 24  | KLHL7     |
| chr14:19064582-19066347   | 39  | LINC01296 |
| chr17:51201591-51203228   | 3   | MBTD1     |
| chr8:47969797-47971468    | 54  | MCM4      |
| chr13:23798723-23841488   | 7   | MIPEP     |
| chr2:177232391-177234271  | 34  | NFE2L2    |
| chr20:61963440-61964030   | 28  | nogene    |
| chr11:62522629-62526511   | 56  | nogene    |
| chr7:24816609-24834736    | 8   | OSBPL3    |
| chr14:29599026-29626556   | 19  | PRKD1     |
| chr14:29624151-29636494   | 61  | PRKD1     |
| chr4:109473003-109481781  | 9   | SEC24B    |
| chr1:151638887-151666011  | 9   | SNX27     |
| chr12:2994737-2994992     | 43  | TEAD4     |
| chr10:119576610-119588248 | 7   | TIAL1     |

|                           |     |              |
|---------------------------|-----|--------------|
| chr6:43562246-43573601    | 18  | XPO5         |
| chr10:34347964-34360259   | 16  | PARD3        |
| chr12:42374862-42387535   | 16  | PPHLN1       |
| chr1:173992754-173993135  | 159 | RC3H1        |
| chr8:9016321-9020464      | 19  | ERI1         |
| chr9:78254835-78264316    | 36  | CEP78        |
| chr4:39081962-39086727    | 9   | KLHL5        |
| chr5:71501561-71504751    | 10  | BDP1         |
| chr3:154284582-154295339  | 11  | DHX36        |
| chr7:770470-775162        | 344 | DNAAF5       |
| chr5:108954728-109047198  | 15  | FER          |
| chr8:94836523-94842488    | 11  | INTS8        |
| chr1:10271501-10276399    | 10  | KIF1B        |
| chr10:79804484-79808832   | 11  | NUTM2B-AS1   |
| chr1:30974650-30982640    | 5   | PUM1         |
| chr7:140776911-140783157  | 35  | BRAF         |
| chr1:155438326-155477958  | 8   | ASH1L        |
| chr22:37496448-37497178   | 39  | CARD10       |
| chr13:60093627-60132989   | 49  | DIAPH3       |
| chr5:151786602-151800869  | 9   | G3BP1        |
| chr15:41005592-41027736   | 10  | INO80        |
| chrX:70341798-70353807    | 210 | KIF4A        |
| chr17:5214049-5215293     | 9   | LOC100130950 |
| chr3:100339086-100348881  | 6   | NIT2         |
| chrX:102897573-102905737  | 33  | nogene       |
| chr11:108192117-108197420 | 11  | NPAT         |
| chr1:51745535-51772723    | 13  | OSBPL9       |
| chr20:18142207-18150942   | 23  | PET117       |
| chr8:128009589-128070272  | 25  | PVT1         |
| chr6:3076763-3083313      | 31  | RIPK1        |
| chr7:45751528-45759174    | 26  | SEPT7P2      |
| chr2:171833962-171855949  | 7   | SLC25A12     |
| chr14:34593044-34609742   | 28  | SNX6         |
| chr20:37393894-37396311   | 14  | SRC          |
| chr1:77729859-77736158    | 12  | USP33        |
| chr4:84702352-84709347    | 4   | WDFY3        |
| chr1:153639145-153640498  | 10  | nogene       |
| chr11:60897845-60903861   | 10  | PRPF19       |
| chr1:64049690-64050716    | 39  | ROR1         |
| chr17:37330172-37330425   | 29  | ACACA        |
| chr1:92665938-92704744    | 99  | EVI5         |
| chr19:14039507-14039910   | 99  | IL27RA       |
| chr6:73425463-73440445    | 14  | MB21D1       |

|                           |     |                 |
|---------------------------|-----|-----------------|
| chr6:132372607-132374777  | 17  | MOXD1           |
| chr17:44801060-44801884   | 16  | nogene          |
| chr7:111386973-111390694  | 5   | nogene          |
| chr9:6475390-6477808      | 20  | UHRF2           |
| chr10:102699372-102705489 | 4   | ARL3            |
| chr14:96832430-96860735   | 6   | VRK1            |
| chr19:32625873-32628849   | 39  | ANKRD27         |
| chrX:108595508-108603061  | 10  | COL4A5          |
| chr7:122379367-122416164  | 7   | CADPS2          |
| chr7:2229983-2230764      | 90  | MAD1L1          |
| chr11:977094-981299       | 5   | AP2A2           |
| chr7:24679130-24680520    | 46  | MPP6            |
| chr2:206132944-206142831  | 4   | NDUFS1          |
| chr1:35385441-35390098    | 6   | ZMYM4           |
| chr4:112253207-112266716  | 4   | AP1AR           |
| chr14:54408744-54415930   | 13  | CDKN3           |
| chr7:137901353-137916012  | 20  | CREB3L2         |
| chr3:81642780-81705613    | 91  | GBE1            |
| chr9:4117767-4118881      | 30  | GLIS3           |
| chr10:72715110-72715902   | 26  | MCU             |
| chr14:45235813-45237721   | 14  | MIS18BP1        |
| chr22:41264663-41281082   | 15  | RANGAP1         |
| chr8:99134631-99148010    | 16  | VPS13B          |
| chr2:171468887-171469452  | 26  | DCAF17          |
| chr19:50394562-50394930   | 12  | nogene          |
| chr1:16630889-16633346    | 18  | CROCCP2         |
| chr1:119146952-119150746  | 14  | LOC101929147    |
| chr12:121743628-121761738 | 23  | TMEM120B        |
| chr4:5729306-5741814      | 11  | EVC             |
| chr3:189132398-189147647  | 17  | nogene          |
| chr9:96533926-96534542    | 5   | CDC14B          |
| chr6:42934128-42934881    | 10  | nogene          |
| chr10:68430435-68430660   | 29  | DNA2            |
| chr18:37084124-37173081   | 15  | KIAA1328        |
| chr21:46279992-46280575   | 48  | MCM3AP          |
| chr7:2244562-2245277      | 32  | NUDT1           |
| chr13:49451552-49467960   | 9   | SETDB2          |
| chr19:37770004-37773751   | 16  | ZNF573          |
| chr22:24302194-24313466   | 186 | SPECC1L-ADORA2A |
| chr5:65242103-65300131    | 49  | ADAMTS6         |
| chr2:97146485-97154741    | 15  | ANKRD36         |
| chr14:57244164-57247712   | 32  | EXOC5           |
| chr16:87415275-87418901   | 16  | ZCCHC14         |

|                           |      |           |
|---------------------------|------|-----------|
| chr19:6382553-6383011     | 13   | nogene    |
| chr8:6724869-6747828      | 256  | AGPAT5    |
| chr2:108791674-108805008  | 21   | CCDC138   |
| chr6:44403808-44408632    | 73   | CDC5L     |
| chr16:53254437-53274302   | 52   | CHD9      |
| chr9:67188784-67201219    | 11   | CNTNAP3P2 |
| chr11:68796855-68812576   | 4    | CPT1A     |
| chr19:3118923-3119359     | 20   | GNA11     |
| chr1:41628748-41628947    | 10   | HIVEP3    |
| chr11:77955941-77961138   | 84   | INTS4     |
| chr6:36465600-36470257    | 11   | KCTD20    |
| chr7:21020867-21033558    | 10   | LINC01162 |
| chr4:169576927-169590809  | 19   | NEK1      |
| chr19:3449013-3452666     | 16   | NFIC      |
| chr5:41794002-41801070    | 19   | OXCT1     |
| chr4:120903260-120907557  | 11   | PRDM5     |
| chr14:73198030-73211942   | 14   | PSEN1     |
| chr8:140864311-140890769  | 1568 | PTK2      |
| chr8:140761164-140890769  | 7    | PTK2      |
| chr12:113304320-113307844 | 9    | SLC8B1    |
| chr19:11059752-11060187   | 11   | SMARCA4   |
| chr11:68189916-68190152   | 28   | SUV420H1  |
| chr7:27748517-27769834    | 62   | TAX1BP1   |
| chr1:154241512-154246375  | 38   | UBAP2L    |
| chr12:27046157-27066226   | 9    | nogene    |
| chr5:73074741-73082825    | 5    | FCHO2     |
| chr2:69348170-69350183    | 14   | GFPT1     |
| chr2:203402575-203427269  | 96   | ABI2      |
| chr1:110009033-110014857  | 4    | AHCYL1    |
| chr11:76451857-76460085   | 3    | C11orf30  |
| chr3:119905754-119923483  | 55   | GSK3B     |
| chr8:30700080-30708141    | 11   | GSR       |
| chr5:178055663-178055981  | 23   | nogene    |
| chr2:24823955-24824639    | 46   | nogene    |
| chr2:65246523-65265175    | 112  | ACTR2     |
| chr7:50703820-50710990    | 16   | GRB10     |
| chr2:74874265-74886393    | 9    | HK2       |
| chr14:59487673-59498908   | 14   | JKAMP     |
| chr21:46275185-46280575   | 15   | MCM3AP    |
| chr8:103910133-103961133  | 3    | RIMS2     |
| chr10:124484138-124488575 | 10   | LHPP      |
| chr5:139121034-139128052  | 8    | SIL1      |
| chr10:124942456-124943307 | 156  | ZRANB1    |

|                           |     |              |
|---------------------------|-----|--------------|
| chr1:66940027-66963160    | 73  | MIER1        |
| chr4:173384650-173403950  | 4   | nogene       |
| chr11:85974707-86031611   | 39  | PICALM       |
| chr7:80789305-80828745    | 23  | SEMA3C       |
| chr7:77360823-77375101    | 2   | GSAP         |
| chr8:47465024-47465483    | 5   | nogene       |
| chr12:102148229-102165883 | 42  | PARPBP       |
| chr17:39989738-39990197   | 3   | PSMD3        |
| chr7:105481051-105495253  | 51  | PUS7         |
| chr12:108817037-108818558 | 24  | SSH1         |
| chr12:120713273-120717042 | 2   | UNC119B      |
| chr4:169463242-169479534  | 23  | NEK1         |
| chr7:904125-926644        | 29  | ADAP1        |
| chr5:150006472-150018697  | 9   | HMGXB3       |
| chr12:87527757-87583786   | 34  | nogene       |
| chr5:154790324-154811640  | 16  | LARP1        |
| chr18:62348167-62349937   | 105 | TNFRSF11A    |
| chr10:31820386-31854206   | 7   | ARHGAP12     |
| chr2:105339582-105345389  | 17  | C2orf49      |
| chr12:28305648-28412938   | 10  | CCDC91       |
| chr5:75343852-75345658    | 13  | HMGCR        |
| chr7:23342063-23361741    | 32  | IGF2BP3      |
| chr1:187269395-187329060  | 38  | LINC01036    |
| chr1:58671869-58685251    | 4   | MYSM1        |
| chr17:47590716-47613725   | 6   | NPEPPS       |
| chr3:132681913-132692818  | 12  | NPHP3-ACAD11 |
| chr3:171733443-171738082  | 11  | PLD1         |
| chr12:79845301-79872938   | 11  | PPP1R12A     |
| chr1:150334934-150340477  | 9   | PRPF3        |
| chr9:112262434-112330474  | 12  | PTBP3        |
| chr5:69391830-69393500    | 26  | RAD17        |
| chr12:116740344-116741094 | 16  | RNFT2        |
| chr16:1962930-1963148     | 9   | RPS2         |
| chrX:18247768-18257030    | 13  | SCML2        |
| chr1:11018732-11020599    | 6   | TARDBP       |
| chr8:140300468-140311374  | 12  | TRAPPC9      |
| chr9:135933056-135933515  | 19  | UBAC1        |
| chr9:111914604-111926496  | 28  | UGCG         |
| chr14:96833466-96837817   | 39  | VRK1         |
| chr16:879569-881505       | 24  | LMF1         |
| chr3:188484591-188524787  | 14  | LPP          |
| chr3:142347233-142376594  | 6   | XRN1         |
| chr10:24629995-24670397   | 9   | ARHGAP21     |



|                          |     |          |
|--------------------------|-----|----------|
| chr2:176296859-176329426 | 6   | MTX2     |
| chr5:40764513-40777586   | 63  | PRKAA1   |
| chr17:30868332-30869646  | 10  | ATAD5    |
| chr5:113534304-113539181 | 100 | YTHDC2   |
| chr22:17864898-17872023  | 15  | MICAL3   |
| chr10:86443274-86446449  | 21  | WAPL     |
| chr1:176081151-176136547 | 208 | RFWD2    |
| chr22:46891265-46929635  | 3   | TBC1D22A |
| chr9:69064937-69072830   | 13  | FXN      |
| chr13:45136732-45207505  | 3   | GTF2F2   |
| chr2:96601642-96602862   | 7   | KANSL3   |
| chr2:84850010-84853410   | 12  | nogene   |
| chr5:178885613-178931326 | 51  | nogene   |
| chr13:24484652-24493733  | 234 | PARP4    |
| chr10:1080010-1080476    | 45  | WDR37    |
| chr2:202796889-202829016 | 11  | ICA1L    |
| chr20:50561362-50568478  | 13  | PTPN1    |
| chr14:66681106-66824566  | 9   | GPHN     |
| chr9:110941420-111011690 | 128 | LPAR1    |
| chr14:70748828-70761182  | 4   | MAP3K9   |
| chr1:6531967-6533441     | 9   | NOL9     |
| chr20:47282101-47287284  | 3   | ZMYND8   |
| chr1:52863980-52867777   | 3   | ZYG11A   |
| chr6:125292840-125300659 | 3   | HDDC2    |
| chr3:154187684-154194718 | 23  | ARHGEF26 |
| chrX:17477145-17477320   | 8   | nogene   |
| chr15:70919049-70984257  | 11  | LRRC49   |
| chr15:55348331-55348725  | 8   | nogene   |
| chr8:43023113-43023547   | 71  | nogene   |
| chr21:43734068-43755764  | 4   | PDXK     |
| chr14:99461191-99465813  | 12  | SETD3    |
| chr10:50460672-50466932  | 17  | SGMS1    |
| chr20:62857394-62859526  | 398 | TCFL5    |
| chr19:56146246-56147208  | 14  | ZNF444   |
| chr5:115866669-115902992 | 23  | AP3S1    |
| chr9:26884809-26887513   | 17  | CAAP1    |
| chr19:6362445-6366363    | 15  | CLPP     |
| chr4:5835914-5843161     | 4   | CRMP1    |
| chr8:17064083-17090584   | 8   | MICU3    |
| chr15:41356038-41371684  | 29  | NUSAP1   |
| chr9:109931926-109943381 | 3   | PALM2    |
| chr1:8614560-8656441     | 12  | RERE     |
| chr4:129043394-129082373 | 12  | SCLT1    |

|                           |     |          |
|---------------------------|-----|----------|
| chr2:39006411-39010703    | 12  | SOS1     |
| chr1:235419416-235434280  | 4   | TBCE     |
| chr12:109101901-109103611 | 53  | UNG      |
| chrX:75450801-75478985    | 7   | ZDHHC15  |
| chr13:20026611-20036909   | 24  | ZMYM2    |
| chr20:47294665-47298947   | 10  | ZMYND8   |
| chr6:38592575-38598121    | 20  | BTBD9    |
| chr1:94458606-94491247    | 9   | ABCD3    |
| chr1:36009474-36027298    | 5   | AGO3     |
| chr8:140275657-140287734  | 18  | TRAPPC9  |
| chrX:96881578-96918617    | 10  | DIAPH2   |
| chr1:171523220-171524965  | 25  | PRRC2C   |
| chr1:70296129-70324957    | 12  | ANKRD13C |
| chr7:148766560-148767749  | 34  | CUL1     |
| chr1:25553921-25557267    | 20  | LDLRAP1  |
| chr7:67083429-67098718    | 25  | TYW1     |
| chr2:48346200-48359147    | 12  | FOXN2    |
| chr9:94773001-94801002    | 98  | C9orf3   |
| chr12:24878529-24894475   | 24  | BCAT1    |
| chr5:32121494-32126636    | 10  | GOLPH3   |
| chr9:93476255-93516269    | 19  | FAM120A  |
| chr12:70329422-70330469   | 4   | CNOT2    |
| chr4:42001615-42023384    | 61  | SLC30A9  |
| chr1:152332582-152341210  | 9   | FLG-AS1  |
| chr14:50180571-50204409   | 36  | SOS2     |
| chr10:50095147-50110270   | 4   | FAM21A   |
| chr13:30227411-30283687   | 4   | KATNAL1  |
| chr12:14456560-14457295   | 24  | ATF7IP   |
| chr8:102833055-102834747  | 28  | AZIN1    |
| chr1:28027788-28058094    | 7   | EYA3     |
| chr9:710803-713464        | 9   | KANK1    |
| chr13:113309642-113309862 | 5   | LAMP1    |
| chr3:15032378-15034809    | 19  | NR2C2    |
| chr3:29868857-29936196    | 7   | RBMS3    |
| chr2:9237832-9297445      | 55  | ASAP2    |
| chr10:48401611-48410168   | 184 | MAPK8    |
| chr8:103697085-103697296  | 57  | RIMS2    |
| chr9:36581643-36589652    | 30  | MELK     |
| chr1:62618705-62625401    | 13  | DOCK7    |
| chr8:42906172-42974194    | 4   | HOOK3    |
| chr3:50065030-50070552    | 10  | RBM6     |
| chr11:83206057-83236509   | 52  | ANKRD42  |
| chr17:18865468-18911251   | 60  | PRPSAP2  |

|                           |     |          |
|---------------------------|-----|----------|
| chr5:168488601-168502105  | 15  | RARS     |
| chr6:135300499-135394896  | 27  | AHI1     |
| chr19:57925622-57928047   | 11  | ZNF418   |
| chr11:30330885-30332993   | 3   | ARL14EP  |
| chr11:47750915-47765362   | 3   | FNBP4    |
| chr13:73813151-73846373   | 3   | KLF12    |
| chr4:110418240-110419105  | 3   | no gene  |
| chr19:55098783-55112795   | 41  | PPP1R12C |
| chr3:45703437-45732151    | 3   | SACM1L   |
| chr10:15248638-15284105   | 19  | FAM171A1 |
| chr7:77292951-77294929    | 6   | CCDC146  |
| chr7:30836657-30840848    | 13  | FAM188B  |
| chr8:56963962-56966352    | 4   | IMPAD1   |
| chr3:101801234-101807126  | 31  | NXPE3    |
| chr19:3638883-3648708     | 20  | PIP5K1C  |
| chr2:247537-253115        | 4   | SH3YL1   |
| chr19:9532844-9535279     | 34  | ZNF426   |
| chr2:61068848-61070500    | 26  | KIAA1841 |
| chr12:22517985-22544179   | 12  | C2CD5    |
| chr18:79695224-79704917   | 32  | CTDP1    |
| chr2:203355153-203367044  | 13  | ABI2     |
| chr11:94795010-94800311   | 63  | AMOTL1   |
| chr10:73387688-73400857   | 21  | ANXA7    |
| chr7:107362032-107412632  | 13  | COG5     |
| chr15:80978930-80982182   | 15  | MESDC2   |
| chr10:97476682-97478389   | 34  | MMS19    |
| chr17:16034764-16040494   | 24  | NCOR1    |
| chr6:111343924-111357125  | 4   | REV3L    |
| chr14:39048651-39067296   | 13  | SEC23A   |
| chr4:143527867-143530526  | 33  | SMARCA5  |
| chr19:9417827-9420218     | 5   | ZNF266   |
| chr4:145123020-145125101  | 29  | ABCE1    |
| chr10:24591886-24595039   | 2   | ARHGAP21 |
| chr3:11355420-11380052    | 21  | ATG7     |
| chr1:235484321-235494828  | 14  | B3GALNT2 |
| chr7:82335134-82403855    | 10  | CACNA2D1 |
| chr17:64519320-64522895   | 46  | CEP95    |
| chr11:125629231-125633351 | 18  | CHEK1    |
| chr4:73064777-73065413    | 2   | COX18    |
| chr4:15007304-15033211    | 15  | CPEB2    |
| chr11:68803999-68807638   | 132 | CPT1A    |
| chr8:67164390-67179926    | 9   | CSPP1    |
| chr5:157285338-157287108  | 9   | CYFIP2   |

|                           |     |          |
|---------------------------|-----|----------|
| chr1:15638306-15649823    | 2   | DDI2     |
| chr10:110502720-110507154 | 54  | DUSP5    |
| chr20:34526267-34534795   | 8   | DYNLRB1  |
| chr10:73141145-73146361   | 2   | ECD      |
| chr3:55950424-56007321    | 13  | ERC2     |
| chr12:53276619-53277960   | 3   | ESPL1    |
| chr4:53379072-53399839    | 2   | FIP1L1   |
| chr9:20694519-20720534    | 2   | FOCAD    |
| chr4:48590658-48605833    | 2   | FRYL     |
| chr3:197756425-197778464  | 13  | FYTTD1   |
| chr9:125297428-125299106  | 20  | GAPVD1   |
| chr16:4811169-4817697     | 18  | GLYR1    |
| chr10:67990903-68044563   | 7   | HERC4    |
| chr5:133064979-133067557  | 12  | HSPA4    |
| chr1:158084421-158088454  | 16  | KIRREL   |
| chr20:62345817-62347028   | 19  | LAMA5    |
| chr16:20821761-20828537   | 19  | LOC81691 |
| chr9:125506309-125559809  | 2   | MAPKAP1  |
| chr2:96351830-96354388    | 6   | NCAPH    |
| chr2:45697940-45701491    | 6   | nogene   |
| chr4:22727390-22727772    | 12  | nogene   |
| chr3:184363973-184364275  | 11  | nogene   |
| chr14:49853750-49862805   | 58  | nogene   |
| chr9:121057893-121067564  | 9   | nogene   |
| chr7:99113580-99113835    | 18  | nogene   |
| chr1:51819799-51834170    | 6   | NRD1     |
| chr11:3731390-3744649     | 15  | NUP98    |
| chr11:117152440-117161261 | 19  | PAFAH1B2 |
| chr2:205172210-205193320  | 92  | PARD3B   |
| chr11:86011029-86031611   | 143 | PICALM   |
| chr4:56990747-56999781    | 2   | POLR2B   |
| chr22:50372019-50389111   | 14  | PPP6R2   |
| chr8:47799209-47807326    | 2   | PRKDC    |
| chr20:38488402-38493132   | 33  | RALGAPB  |
| chr1:2395783-2403589      | 29  | RER1     |
| chr16:74649131-74652122   | 13  | RFWD3    |
| chrX:84116228-84135210    | 2   | RPS6KA6  |
| chr10:97388251-97388624   | 16  | RRP12    |
| chr2:199348700-199381820  | 37  | SATB2    |
| chr1:41046406-41048890    | 9   | SCMH1    |
| chr19:46776974-46784559   | 2   | SLC1A5   |
| chr2:32114637-32128479    | 12  | SPAST    |
| chr2:168161786-168182090  | 102 | STK39    |

|                           |     |           |
|---------------------------|-----|-----------|
| chr7:99903217-99917885    | 10  | TRIM4     |
| chr14:90676522-90689712   | 10  | TTC7B     |
| chr13:41811224-41868477   | 7   | VWA8      |
| chr16:28166507-28169909   | 53  | XPO6      |
| chr14:54957033-54957635   | 6   | WDHD1     |
| chr10:102001970-102014024 | 12  | C10orf76  |
| chr11:68519500-68537891   | 110 | PPP6R3    |
| chr6:36524340-36540207    | 45  | STK38     |
| chr1:92605306-92704744    | 9   | EVI5      |
| chr11:82849048-82860117   | 9   | PRCP      |
| chr6:158573419-158608750  | 48  | TMEM181   |
| chr5:160010499-160023692  | 8   | TTC1      |
| chr12:110342227-110342448 | 9   | ATP2A2    |
| chr18:79303603-79307234   | 4   | ATP9B     |
| chr2:48451007-48465642    | 11  | PPP1R21   |
| chr3:125313307-125323444  | 34  | ZNF148    |
| chr16:70255727-70268379   | 7   | AARS      |
| chr10:122951953-122953032 | 4   | C10orf88  |
| chr2:113444963-113457204  | 41  | CBWD2     |
| chr1:168043024-168068463  | 12  | DCAF6     |
| chr1:15638306-15651895    | 50  | DDI2      |
| chr22:31403028-31411081   | 12  | DRG1      |
| chr2:148761781-148765146  | 10  | EPC2      |
| chr6:98899267-98934879    | 17  | FBXL4     |
| chr3:49123131-49123373    | 13  | LAMB2     |
| chrX:3826484-3829392      | 12  | LOC389906 |
| chr12:123210055-123223127 | 10  | MPHOSPH9  |
| chr14:105445417-105454310 | 15  | MTA1      |
| chr8:71961930-71973659    | 15  | nogene    |
| chr10:900269-900729       | 10  | nogene    |
| chr13:24484652-24501834   | 33  | PARP4     |
| chr2:200876918-200887685  | 52  | PPIL3     |
| chr3:114065236-114080057  | 8   | QTRTD1    |
| chr3:57847196-57862086    | 21  | SLMAP     |
| chr10:94493364-94500327   | 42  | TBC1D12   |
| chr17:59012327-59017424   | 25  | TRIM37    |
| chr7:98983263-98988966    | 10  | TRRAP     |
| chr7:120806548-120840109  | 15  | TSPAN12   |
| chr15:99156147-99161867   | 14  | TTC23     |
| chr1:21721035-21721764    | 14  | USP48     |
| chr10:120858642-120867169 | 10  | WDR11     |
| chr3:141368620-141413639  | 10  | ZBTB38    |
| chr20:25685566-25686466   | 24  | ZNF337    |

|                           |     |              |
|---------------------------|-----|--------------|
| chr12:53276619-53277227   | 25  | ESPL1        |
| chr12:94400849-94412591   | 10  | CEP83        |
| chr13:98213219-98213413   | 34  | FARP1        |
| chr10:69364782-69369624   | 14  | HK1          |
| chr18:63338799-63362868   | 10  | KDSR         |
| chr11:71916073-71923475   | 4   | LOC100133315 |
| chr22:28514756-28583669   | 10  | nogene       |
| chr7:9708000-9716909      | 6   | nogene       |
| chr17:45475099-45478147   | 8   | PLEKHM1      |
| chr5:69123198-69128132    | 9   | SLC30A5      |
| chr8:140830471-140846678  | 12  | PTK2         |
| chr4:86686709-86701801    | 14  | PTPN13       |
| chr7:74239937-74249118    | 26  | RFC2         |
| chr1:244411286-244437768  | 3   | ADSS         |
| chr17:19651546-19657862   | 20  | ALDH3A2      |
| chr17:18021122-18028659   | 14  | ATPAF2       |
| chr3:63912587-63913225    | 537 | ATXN7        |
| chr11:116757145-116758407 | 31  | BUD13        |
| chr2:36378356-36442735    | 51  | CRIM1        |
| chr8:141151618-141155970  | 14  | DENND3       |
| chr6:52437561-52438591    | 26  | EFHC1        |
| chr10:5709529-5712918     | 27  | FAM208B      |
| chrX:147921932-147932763  | 3   | FMR1         |
| chr3:172251259-172310881  | 21  | FNDC3B       |
| chr9:4286037-4286435      | 51  | GLIS3        |
| chr3:155906159-155911279  | 14  | GMPS         |
| chr9:36246030-36249397    | 24  | GNE          |
| chr10:884446-890829       | 112 | LARP4B       |
| chr10:96907264-96944245   | 14  | LCOR         |
| chr4:41666560-41692384    | 6   | LIMCH1       |
| chr7:156734176-156826744  | 16  | LMBR1        |
| chr11:68357649-68390052   | 19  | LRP5         |
| chr7:1936686-2069338      | 4   | MAD1L1       |
| chr12:111649179-111649771 | 24  | nogene       |
| chr22:40367398-40368678   | 21  | nogene       |
| chr3:132715084-132719830  | 4   | NPHP3-ACAD11 |
| chr3:136260478-136262065  | 81  | PCCB         |
| chr2:172558707-172570824  | 13  | PDK1         |
| chr2:189785345-189805754  | 18  | PMS1         |
| chr7:105472131-105482440  | 14  | PUS7         |
| chr14:73076318-73077536   | 12  | RBM25        |
| chr14:54737023-54751537   | 23  | SAMD4A       |
| chr18:47896520-47896809   | 13  | SMAD2        |

|                          |     |          |
|--------------------------|-----|----------|
| chr7:105203627-105268869 | 143 | SRPK2    |
| chr3:136417884-136423044 | 27  | STAG1    |
| chr16:89892192-89896083  | 42  | TCF25    |
| chr6:42268153-42269848   | 14  | TRERF1   |
| chr1:114463103-114463556 | 41  | TRIM33   |
| chr19:34433347-34467014  | 12  | UBA2     |
| chr2:106129673-106166083 | 16  | UXS1     |
| chr8:99170038-99193057   | 24  | VPS13B   |
| chr10:86460398-86461287  | 6   | WAPL     |
| chr11:74906238-74907273  | 10  | XRRA1    |
| chr2:32290482-32292348   | 3   | YIPF4    |
| chr19:2084506-2084641    | 34  | nogene   |
| chr1:225530553-225567414 | 7   | ENAH     |
| chr15:67664596-67748601  | 13  | MAP2K5   |
| chr20:31782248-31797515  | 35  | TPX2     |
| chr8:42350006-42361365   | 39  | POLB     |
| chr5:618989-655584       | 28  | CEP72    |
| chr9:93470328-93476338   | 51  | FAM120A  |
| chr11:45862059-45872233  | 29  | CRY2     |
| chr10:68913161-68919981  | 13  | DDX50    |
| chr5:112259890-112307490 | 4   | EPB41L4A |
| chr10:74267564-74398579  | 13  | ADK      |
| chr10:74242737-74398579  | 64  | ADK      |
| chr10:12088985-12094271  | 13  | DHTKD1   |
| chr3:138621406-138629156 | 11  | FAIM     |
| chr12:95134738-95141539  | 3   | FGD6     |
| chr6:17771907-17779099   | 39  | KIF13A   |
| chr4:102714437-102730736 | 12  | MANBA    |
| chr14:54566198-54567846  | 8   | nogene   |
| chr17:47613668-47619164  | 4   | NPEPPS   |
| chr1:229458160-229463676 | 9   | NUP133   |
| chr6:143470960-143474856 | 63  | PEX3     |
| chr2:169606038-169614724 | 41  | PPIG     |
| chr16:89544647-89548113  | 7   | SPG7     |
| chr4:98105952-98109305   | 9   | STPG2    |
| chr14:39154210-39159550  | 24  | TRAPPC6B |
| chr17:4112608-4114470    | 4   | ZZEF1    |
| chr13:26324771-26353880  | 63  | CDK8     |
| chr2:197459931-197462731 | 24  | COQ10B   |
| chr7:128856921-128857096 | 12  | FLNC     |
| chr2:154140336-154259138 | 3   | GALNT13  |
| chr7:50703820-50705323   | 31  | GRB10    |
| chr6:77214625-77273307   | 27  | nogene   |

|                           |     |           |
|---------------------------|-----|-----------|
| chr4:48851805-48857365    | 3   | OCIAD1    |
| chr1:93156299-93160226    | 7   | TMED5     |
| chr5:73857655-73858219    | 25  | ARHGEF28  |
| chr11:66521269-66526807   | 6   | BBS1      |
| chr1:114719578-114720717  | 99  | CSDE1     |
| chr9:113198854-113211592  | 11  | FKBP15    |
| chr1:240121572-240123345  | 78  | FMN2      |
| chr14:31168297-31169468   | 40  | HECTD1    |
| chrX:70341798-70365889    | 10  | KIF4A     |
| chr7:131387119-131429145  | 14  | MKLN1     |
| chr3:15016151-15030452    | 19  | NR2C2     |
| chr7:44674410-44675268    | 159 | OGDH      |
| chrX:41183997-41186642    | 10  | USP9X     |
| chr9:111583471-111597432  | 9   | PTGR1     |
| chr8:140861223-140890769  | 20  | PTK2      |
| chr20:49023050-49032166   | 2   | ARFGEF2   |
| chr15:100609706-100630042 | 14  | ASB7      |
| chr3:11298685-11309061    | 5   | ATG7      |
| chr3:107710451-107716849  | 219 | BBX       |
| chr1:222724091-222725555  | 14  | BROX      |
| chr2:61876094-61879011    | 16  | CCT4      |
| chr1:227026054-227035607  | 13  | CDC42BPA  |
| chr14:80831142-80840768   | 27  | CEP128    |
| chr12:6587383-6588422     | 41  | CHD4      |
| chr7:6430479-6432959      | 5   | DAGLB     |
| chr14:53058476-53093444   | 2   | DDHD1     |
| chr9:137834348-137835088  | 25  | EHMT1     |
| chr14:57246710-57247712   | 26  | EXOC5     |
| chr18:13666478-13682105   | 92  | FAM210A   |
| chr17:6447462-6447758     | 53  | FAM64A    |
| chr10:121538591-121565704 | 6   | FGFR2     |
| chr9:20715321-20781929    | 17  | FOCAD     |
| chr9:83290602-83299186    | 13  | FRMD3     |
| chr2:69337897-69345999    | 30  | GFPT1     |
| chr17:36554819-36567776   | 140 | GGNBP2    |
| chr1:235341707-235342883  | 20  | GGPS1     |
| chr4:2984512-3029409      | 14  | GRK4      |
| chr2:238188130-238189972  | 18  | ILKAP     |
| chr8:28835291-28846809    | 2   | INTS9     |
| chr2:9412268-9418732      | 16  | ITGB1BP1  |
| chr3:124796387-124809156  | 5   | ITGB5     |
| chr10:89718709-89726521   | 11  | KIF20B    |
| chrX:102839800-102905737  | 24  | LINC00630 |



|                           |     |          |
|---------------------------|-----|----------|
| chr4:150870524-150897818  | 11  | LRBA     |
| chr1:117460488-117493262  | 15  | MAN1A2   |
| chr2:31891991-31956598    | 3   | MEMO1    |
| chr17:42540949-42541206   | 3   | NAGLU    |
| chr5:150520867-150521767  | 204 | NDST1    |
| chr19:3433517-3435207     | 3   | NFIC     |
| chr1:30948145-30948506    | 13  | nogene   |
| chr5:85805306-85827796    | 10  | nogene   |
| chr3:196019879-196027260  | 12  | nogene   |
| chr3:168057080-168057613  | 10  | nogene   |
| chr19:17934761-17935924   | 9   | nogene   |
| chr21:29372434-29411624   | 2   | nogene   |
| chr19:11114013-11114607   | 19  | nogene   |
| chr16:27233000-27235299   | 23  | NSMCE1   |
| chrX:68197185-68206673    | 4   | OPHN1    |
| chr10:117318871-117341102 | 50  | PDZD8    |
| chr14:91481575-91485730   | 116 | PPP4R3A  |
| chr9:112252677-112297916  | 26  | PTBP3    |
| chr9:109420423-109438234  | 10  | PTPN3    |
| chr2:1639005-1639301      | 11  | PXDN     |
| chr2:108740488-108753563  | 9   | RANBP2   |
| chr5:168493893-168516950  | 12  | RARS     |
| chr15:64748418-64751638   | 28  | RBPM52   |
| chr6:3076763-3081116      | 19  | RIPK1    |
| chr1:41070594-41075451    | 675 | SCMH1    |
| chr12:100282942-100298175 | 514 | SCYL2    |
| chr14:39093186-39096139   | 10  | SEC23A   |
| chrX:119629317-119629508  | 6   | 6-Sep    |
| chr6:111172694-111219042  | 5   | SLC16A10 |
| chr4:102304316-102315742  | 16  | SLC39A8  |
| chr11:4055525-4074679     | 17  | STIM1    |
| chr17:82870223-82900731   | 42  | TBCD     |
| chr6:125993756-126021280  | 15  | TRMT11   |
| chr9:33948373-33963791    | 32  | UBAP2    |
| chr10:11967340-12014184   | 30  | UPF2     |
| chr7:6153755-6155195      | 11  | USP42    |
| chr4:1900625-1942565      | 18  | WHSC1    |
| chr9:128740771-128742745  | 39  | ZER1     |
| chr17:32369294-32373453   | 4   | ZNF207   |
| chr18:76937155-76960855   | 8   | ZNF236   |
| chr22:20400631-20401372   | 40  | ZNF74    |
| chr6:135346674-135394896  | 19  | AHI1     |
| chr1:167966628-167993440  | 16  | DCAF6    |

|                          |     |              |
|--------------------------|-----|--------------|
| chr16:89758576-89762022  | 10  | FANCA        |
| chr2:85043563-85049648   | 50  | KCMF1        |
| chr15:41810882-41813101  | 52  | MAPKBP1      |
| chr12:77966228-78007445  | 10  | NAV3         |
| chr11:14771936-14804050  | 9   | PDE3B        |
| chr18:42027442-42040741  | 7   | PIK3C3       |
| chr8:140700890-140746860 | 10  | PTK2         |
| chr4:122979231-123090705 | 19  | SPATA5       |
| chr10:94441895-94444539  | 14  | TBC1D12      |
| chr8:80051526-80064593   | 55  | TPD52        |
| chr5:32414968-32417792   | 52  | ZFR          |
| chr18:6093354-6138296    | 5   | L3MBTL4      |
| chr1:201997318-202000015 | 6   | RNPEP        |
| chr7:2200261-2219456     | 14  | MAD1L1       |
| chr19:36449398-36450001  | 72  | ZNF566       |
| chr15:51896418-51902036  | 11  | TMOD3        |
| chr15:50465046-50471795  | 51  | USP8         |
| chr9:86343074-86346480   | 18  | ZCCHC6       |
| chr17:46050532-46169605  | 16  | KANSL1       |
| chr17:47169916-47172064  | 46  | CDC27        |
| chr6:20739518-20781265   | 11  | CDKAL1       |
| chr8:144309454-144314054 | 3   | HSF1         |
| chr17:18865468-18865952  | 62  | PRPSAP2      |
| chr1:31423692-31426823   | 3   | SERINC2      |
| chr7:5370374-5371364     | 32  | TNRC18       |
| chr2:216141185-216148276 | 17  | XRCC5        |
| chr8:123436452-123441497 | 8   | WDYHV1       |
| chr5:77046346-77048272   | 77  | AGGF1        |
| chr21:43980988-43982619  | 15  | AGPAT3       |
| chr17:19931804-19963022  | 12  | AKAP10       |
| chr12:48939034-48941188  | 19  | ARF3         |
| chr6:100715461-100767345 | 19  | ASCC3        |
| chr2:214767481-214797117 | 137 | BARD1        |
| chr1:19356634-19357563   | 19  | CAPZB        |
| chr11:46816197-46821268  | 25  | CKAP5        |
| chr17:7939512-7940242    | 26  | CNTROB       |
| chr12:31451939-31499671  | 18  | DENND5B      |
| chr14:99850852-99865646  | 56  | EML1         |
| chr5:138510564-138512954 | 65  | ETF1         |
| chr5:137942874-137943216 | 231 | FAM13B       |
| chr7:66479008-66588580   | 28  | GS1-124K5.11 |
| chr1:100049908-100068586 | 11  | HIAT1        |
| chr5:138568924-138571141 | 189 | HSPA9        |

|                          |     |              |
|--------------------------|-----|--------------|
| chrX:46462747-46463308   | 4   | KRBOX4       |
| chr6:167870382-167902386 | 14  | MLLT4        |
| chr16:68190767-68191775  | 39  | NFATC3       |
| chrX:91414903-91453186   | 208 | nogene       |
| chr9:133976432-133978130 | 13  | nogene       |
| chr1:151262160-151267339 | 6   | PSMD4        |
| chr7:29936555-29969068   | 5   | SCRN1        |
| chr1:179335505-179343635 | 27  | SOAT1        |
| chr6:158573419-158631389 | 15  | TMEM181      |
| chr16:24776932-24778468  | 15  | TNRC6A       |
| chr16:24750725-24758599  | 76  | TNRC6A       |
| chr5:113532878-113535798 | 64  | YTHDC2       |
| chr1:200807375-200832845 | 12  | CAMSAP2      |
| chr12:70335437-70342307  | 3   | CNOT2        |
| chr3:97843194-97864647   | 15  | CRYBG3       |
| chr16:56935234-56942237  | 9   | HERPUD1      |
| chrX:107840669-107905626 | 10  | MID2         |
| chr3:52737585-52741499   | 225 | NEK4         |
| chr3:196810589-196818156 | 13  | PAK2         |
| chr17:78414951-78424192  | 5   | PGS1         |
| chr17:28921687-28924302  | 55  | PHF12        |
| chr12:10847044-10883096  | 15  | PRH1-PRR4    |
| chr1:32944018-32949774   | 4   | RNF19B       |
| chr16:70255727-70261157  | 3   | AARS         |
| chr21:45120793-45128573  | 3   | ADARB1       |
| chr11:94850113-94859715  | 15  | AMOTL1       |
| chr8:61679276-61684188   | 12  | ASPH         |
| chr18:79126266-79214038  | 37  | ATP9B        |
| chr15:55432496-55450367  | 11  | DYX1C1-CCPG1 |
| chr8:29009071-29018913   | 3   | HMBOX1       |
| chr1:20744743-20749882   | 15  | HP1BP3       |
| chr8:70637814-70641050   | 18  | LACTB2       |
| chr13:32517856-32522270  | 9   | N4BP2L2      |
| chr17:16079963-16101805  | 13  | NCOR1        |
| chr11:64371521-64371829  | 10  | nogene       |
| chr7:44645326-44666851   | 58  | OGDH         |
| chr5:168559031-168568998 | 39  | PANK3        |
| chr2:172558707-172565073 | 13  | PDK1         |
| chr19:5941620-5957973    | 26  | RANBP3       |
| chr10:68487143-68493570  | 233 | SLC25A16     |
| chr1:48451551-48453131   | 6   | SPATA6       |
| chr17:76067216-76070444  | 15  | SRP68        |
| chr1:25340473-25352974   | 4   | TMEM50A      |

|                           |      |          |
|---------------------------|------|----------|
| chr14:100468020-100484124 | 11   | WDR25    |
| chr2:68131276-68137433    | 3    | WDR92    |
| chr12:76797433-76822531   | 12   | ZDHHC17  |
| chr10:27208245-27208445   | 4    | ACBD5    |
| chr1:246876036-246888517  | 23   | AHCTF1   |
| chr12:28305648-28362515   | 6    | CCDC91   |
| chr6:47533601-47554766    | 140  | CD2AP    |
| chr4:139043073-139045389  | 67   | NOCT     |
| chr3:47395086-47396217    | 15   | PTPN23   |
| chr1:30964673-30968492    | 10   | PUM1     |
| chr9:122853951-122855878  | 7    | RC3H2    |
| chr5:154026398-154029580  | 6    | FAM114A2 |
| chr1:77803269-77815231    | 14   | FAM73A   |
| chr4:105691975-105695668  | 29   | INTS12   |
| chr6:57207627-57210445    | 256  | RAB23    |
| chr1:193203794-193212477  | 20   | CDC73    |
| chr5:43298008-43298975    | 7    | HMGCS1   |
| chr2:61115978-61118116    | 101  | KIAA1841 |
| chr3:197884861-197885357  | 42   | nogene   |
| chr14:73147794-73148094   | 136  | PSEN1    |
| chr3:125489407-125504744  | 9    | SNX4     |
| chr3:196368027-196369511  | 14   | UBXN7    |
| chr3:179701007-179730709  | 10   | USP13    |
| chr20:50902016-50918781   | 11   | ADNP     |
| chr6:35619095-35646366    | 27   | FKBP5    |
| chr5:1032151-1036384      | 27   | NKD2     |
| chr19:34450264-34464131   | 58   | UBA2     |
| chr8:43059091-43064215    | 303  | FNTA     |
| chr5:170919440-171028989  | 11   | RANBP17  |
| chr17:82756164-82870380   | 11   | TBCD     |
| chr2:63378385-63439871    | 24   | WDPCP    |
| chr2:111802427-111805893  | 11   | ANAPC1   |
| chr13:100301459-100340259 | 35   | PCCA     |
| chr2:229768615-229771632  | 12   | TRIP12   |
| chr13:111217678-111244294 | 18   | ARHGEF7  |
| chr4:98379016-98404602    | 4    | RAP1GDS1 |
| chr8:141253988-141254629  | 1357 | SLC45A4  |
| chr4:107682014-107687177  | 11   | PAPSS1   |
| chrX:55729293-55757331    | 3    | RRAGB    |
| chr2:54982514-54987698    | 1608 | RTN4     |
| chr12:49460769-49484669   | 8    | SPATS2   |
| chr5:14280321-14304592    | 16   | TRIO     |
| chr4:147946616-148023413  | 4    | ARHGAP10 |

|                           |     |          |
|---------------------------|-----|----------|
| chr4:56017647-56019555    | 34  | CEP135   |
| chr2:227893794-227905035  | 37  | DAW1     |
| chr13:32194142-32202527   | 4   | FRY      |
| chr19:45065514-45066153   | 47  | nogene   |
| chr3:128060101-128060661  | 37  | SEC61A1  |
| chr2:147896300-147899567  | 105 | ACVR2A   |
| chr2:32509737-32518946    | 8   | BIRC6    |
| chr10:131973033-131973943 | 10  | BNIP3    |
| chr17:67891843-67894165   | 62  | BPTF     |
| chr16:57521067-57526127   | 21  | CCDC102A |
| chr22:17143097-17149745   | 27  | CECR5    |
| chr4:56017647-56024614    | 9   | CEP135   |
| chr18:79695224-79697988   | 70  | CTDP1    |
| chr4:168236251-168237795  | 15  | DDX60    |
| chr12:31433154-31447769   | 37  | DENND5B  |
| chr5:181237608-181238239  | 11  | GNB2L1   |
| chr10:67932596-67955130   | 4   | HERC4    |
| chr7:78343777-78346043    | 28  | MAGI2    |
| chrX:40659226-40659607    | 11  | MED14    |
| chr21:36338773-36344707   | 9   | MORC3    |
| chr13:41252644-41260875   | 9   | MTRF1    |
| chr10:68174065-68175461   | 53  | MYPN     |
| chr2:206127796-206142069  | 24  | NDUFS1   |
| chr10:73068845-73074915   | 36  | P4HA1    |
| chr2:70259359-70277874    | 8   | PCYOX1   |
| chr17:1521578-1558559     | 3   | PITPNA   |
| chr16:18834891-18845651   | 14  | SMG1     |
| chr17:63713405-63728413   | 3   | STRADA   |
| chr20:13528432-13610919   | 13  | TASP1    |
| chr7:5394041-5394595      | 6   | TNRC18   |
| chr21:32378444-32384464   | 59  | URB1     |
| chr14:100353686-100361921 | 11  | WARS     |
| chr12:93476953-93487660   | 16  | MRPL42   |
| chr5:115130591-115141374  | 15  | TRIM36   |
| chr14:22947170-22952683   | 9   | HAUS4    |
| chr20:35672754-35681981   | 5   | NFS1     |
| chr3:94084106-94095154    | 4   | NSUN3    |
| chr20:35713018-35714389   | 4   | RBM39    |
| chr4:4457190-4471706      | 61  | STX18    |
| chr20:36829053-36839441   | 90  | SOGA1    |
| chr4:145845955-145892415  | 4   | ZNF827   |
| chr3:50068689-50070552    | 17  | RBM6     |
| chr19:1149368-1154402     | 16  | SBNO2    |

|                           |     |              |
|---------------------------|-----|--------------|
| chr20:33392141-33397084   | 13  | CDK5RAP1     |
| chr11:20407910-20464546   | 21  | PRMT3        |
| chr6:89627582-89628341    | 13  | ANKRD6       |
| chr16:4700969-4724831     | 13  | ANKS3        |
| chr14:32090501-32117287   | 9   | ARHGAP5      |
| chr15:72563393-72572165   | 49  | ARIH1        |
| chr17:3814321-3816270     | 18  | C17orf85     |
| chr12:122327946-122328426 | 4   | CLIP1        |
| chr3:182940358-182965753  | 8   | DCUN1D1      |
| chr9:123557569-123652123  | 28  | DENND1A      |
| chr22:31876156-31879752   | 10  | DEPDC5       |
| chr18:36141136-36160015   | 12  | ELP2         |
| chr1:50596120-50744775    | 4   | FAF1         |
| chr2:144141881-144211579  | 10  | GTDC1        |
| chr4:128176871-128179512  | 9   | LARP1B       |
| chr5:96979137-96986670    | 12  | LNPEP        |
| chr5:72283504-72314158    | 13  | MRPS27       |
| chr15:72032493-72046634   | 25  | MYO9A        |
| chr12:77940318-77998476   | 33  | NAV3         |
| chr12:6837086-6837401     | 11  | P3H3         |
| chr2:205300529-205301701  | 35  | PARD3B       |
| chr19:3653289-3667353     | 10  | PIP5K1C      |
| chr1:212329134-212333598  | 16  | PPP2R5A      |
| chr9:107318751-107325004  | 7   | RAD23B       |
| chr6:138907494-138917627  | 9   | REPS1        |
| chr5:159181959-159203656  | 12  | RNF145       |
| chrX:18256847-18265802    | 9   | SCML2        |
| chr2:173918592-173956232  | 18  | SP3          |
| chr7:27796115-27800090    | 10  | TAX1BP1      |
| chr14:88852970-88861332   | 14  | TTC8         |
| chr13:99238426-99244624   | 154 | UBAC2        |
| chr11:103311877-103358359 | 16  | DYNC2H1      |
| chr11:86250295-86257596   | 32  | EED          |
| chr16:27213584-27215989   | 3   | KDM8         |
| chr4:107682014-107701285  | 536 | PAPSS1       |
| chr11:78106806-78109581   | 4   | ALG8         |
| chr11:977094-988689       | 11  | AP2A2        |
| chr1:214629045-214638001  | 12  | CENPF        |
| chr17:37625894-37628672   | 10  | DDX52        |
| chr15:65512294-65515791   | 13  | DPP8         |
| chr4:143861141-143979952  | 119 | LOC101927636 |
| chrX:19395080-19398359    | 2   | MAP3K15      |
| chr6:90556499-90571807    | 16  | MAP3K7       |

|                           |    |          |
|---------------------------|----|----------|
| chr19:45271471-45271708   | 5  | MARK4    |
| chr10:5699524-5699737     | 2  | nogene   |
| chr10:49832802-49865381   | 52 | PARG     |
| chr9:131430089-131459356  | 17 | PRRC2B   |
| chr17:5361207-5368468     | 13 | RABEP1   |
| chr1:174272413-174278779  | 11 | RABGAP1L |
| chr1:2395783-2400935      | 15 | RER1     |
| chr5:40827699-40834606    | 15 | RPL37    |
| chr8:119756005-119791459  | 7  | TAF2     |
| chr22:20052464-20056013   | 2  | TANGO2   |
| chr18:662145-669173       | 17 | TYMS     |
| chr9:35236468-35243364    | 62 | UNC13B   |
| chr16:88598177-88611536   | 12 | ZC3H18   |
| chr6:38116571-38142767    | 2  | ZFAND3   |
| chr14:102338815-102339223 | 15 | ZNF839   |
| chr20:33379460-33379691   | 12 | CDK5RAP1 |
| chr6:1959866-1960966      | 41 | GMDS     |
| chr1:173756975-173775842  | 14 | KLHL20   |
| chr15:72019038-72046634   | 14 | MYO9A    |
| chr9:121182929-121193419  | 16 | RAB14    |
| chr1:24531217-24533254    | 23 | RCAN3    |
| chr17:81270917-81272627   | 17 | SLC38A10 |
| chr5:81976192-81987678    | 4  | ATG10    |
| chr10:68430435-68432510   | 5  | DNA2     |
| chr11:47536527-47537526   | 4  | nogene   |
| chr10:73692042-73713332   | 12 | AGAP5    |
| chr20:34519419-34534795   | 12 | DYNLRB1  |
| chr2:69328270-69345999    | 13 | GFPT1    |
| chr2:177440964-177445626  | 3  | AGPS     |
| chr5:37243012-37247745    | 40 | C5orf42  |
| chr7:77274481-77280653    | 21 | CCDC146  |
| chr15:42559338-42563857   | 13 | HAUS2    |
| chr6:25482256-25495215    | 3  | LRRC16A  |
| chr17:5346789-5350629     | 30 | RABEP1   |
| chr1:45457563-45457871    | 4  | TESK2    |
| chr20:31770342-31778984   | 17 | TPX2     |
| chr6:33263483-33264900    | 3  | VPS52    |
| chr21:43613829-43633421   | 17 | HSF2BP   |
| chr6:52516005-52535846    | 11 | TRAM2    |
| chr11:1000431-1003804     | 29 | AP2A2    |
| chr10:115120184-115171292 | 71 | ATRNL1   |
| chrX:101120401-101148161  | 5  | CENPI    |
| chr10:366274-384146       | 58 | DIP2C    |

|                           |     |         |
|---------------------------|-----|---------|
| chr1:53233541-53235635    | 17  | MAGOH   |
| chr6:87656902-87658018    | 9   | ORC3    |
| chr5:69118498-69128132    | 11  | SLC30A5 |
| chr17:39281388-39285573   | 7   | FBXL20  |
| chr16:70261043-70268379   | 33  | AARS    |
| chr1:167966628-168004793  | 26  | DCAF6   |
| chr1:44874677-44881739    | 3   | EIF2B3  |
| chr6:88890494-88891915    | 61  | RNGTT   |
| chr1:246548544-246557534  | 3   | TFB2M   |
| chr16:56407963-56409588   | 3   | AMFR    |
| chr1:197642710-197674169  | 33  | DENND1B |
| chr20:50940864-50955285   | 56  | DPM1    |
| chr10:73152292-73160551   | 16  | ECD     |
| chr21:28986138-28986934   | 20  | LTN1    |
| chr2:135862606-135865163  | 130 | MCM6    |
| chr10:110287994-110288793 | 14  | nogene  |
| chr6:154860737-154863898  | 20  | nogene  |
| chr1:88740987-88741288    | 78  | PKN2    |
| chr12:10973654-11047188   | 35  | PRH1    |
| chrX:110020351-110109146  | 18  | TMEM164 |
| chr3:179761111-179765848  | 3   | USP13   |
| chr18:56923921-56939393   | 91  | WDR7    |
| chr14:102325984-102339223 | 28  | ZNF839  |
| chr4:36107564-36121326    | 4   | ARAP2   |
| chr12:31413435-31447769   | 7   | DENND5B |
| chrX:19392001-19400663    | 58  | MAP3K15 |
| chr8:42344952-42350065    | 5   | POLB    |
| chr3:69043749-69048562    | 11  | TMF1    |
| chr16:46668929-46676692   | 6   | VPS35   |
| chr10:112460523-112464657 | 30  | VTI1A   |
| chr16:89988851-89992828   | 18  | AFG3L1P |
| chr10:77249564-77251256   | 15  | KCNMA1  |
| chr2:216302512-216302666  | 17  | nogene  |
| chr7:11013746-11022979    | 8   | PHF14   |
| chr7:151675419-151676412  | 4   | PRKAG2  |
| chr7:85121740-85153739    | 9   | SEMA3D  |
| chr2:230466300-230474447  | 4   | SP100   |
| chr17:37048653-37049308   | 10  | nogene  |
| chr18:57731413-57732023   | 25  | nogene  |
| chr3:50778674-51090384    | 12  | DOCK3   |
| chr7:1498706-1499360      | 12  | INTS1   |
| chr6:33406195-33406875    | 7   | KIFC1   |
| chr11:85981744-85990399   | 87  | PICALM  |



|                           |      |         |
|---------------------------|------|---------|
| chr15:75409835-75413045   | 12   | SIN3A   |
| chr15:63570432-63574403   | 21   | USP3    |
| chr2:222887829-222909150  | 15   | ACSL3   |
| chr8:39007885-39026810    | 8    | ADAM9   |
| chr21:45118563-45134832   | 18   | ADARB1  |
| chr22:25667738-25674528   | 13   | ADRBK2  |
| chr12:19493799-19518113   | 11   | AEBP2   |
| chr6:135318518-135394896  | 54   | AHI1    |
| chr19:32617588-32625966   | 39   | ANKRD27 |
| chr17:68368547-68370524   | 10   | ARSG    |
| chr8:130159863-130180880  | 52   | ASAP1   |
| chrX:77574249-77595785    | 11   | ATRX    |
| chr1:200807375-200815644  | 13   | CAMSAP2 |
| chr11:34071725-34079765   | 13   | CAPRIN1 |
| chr12:102025973-102061346 | 15   | CCDC53  |
| chr10:32462682-32474023   | 16   | CCDC7   |
| chr3:45110472-45118621    | 27   | CDCP1   |
| chr3:45110472-45112445    | 33   | CDCP1   |
| chr22:46408995-46410561   | 4    | CELSR1  |
| chr5:123416009-123418515  | 5    | CEP120  |
| chr4:169630164-169636088  | 3    | CLCN3   |
| chr16:3504719-3512478     | 38   | CLUAP1  |
| chr12:108701123-108701323 | 56   | CORO1C  |
| chr9:108990725-108999256  | 11   | CTNNAL1 |
| chr11:108094390-108095691 | 43   | CUL5    |
| chr10:100243697-100253539 | 5    | CWF19L1 |
| chr14:69062383-69075411   | 3    | DCAF5   |
| chr1:114587386-114595873  | 14   | DENND2C |
| chr9:19286768-19300331    | 15   | DENND4C |
| chr10:12100177-12101181   | 14   | DHTKD1  |
| chr1:28208341-28214996    | 4    | DNAJC8  |
| chr19:3981338-3982424     | 10   | EEF2    |
| chr9:137710966-137717182  | 7    | EHMT1   |
| chr2:27366758-27367201    | 3    | EIF2B4  |
| chr3:96987329-96987993    | 28   | EPHA6   |
| chr6:70426438-70428419    | 12   | FAM135A |
| chr1:179063926-179064496  | 29   | FAM20B  |
| chr2:58221941-58232112    | 1291 | FANCL   |
| chr14:75622078-75641898   | 11   | FLVCR2  |
| chr3:71112535-71299880    | 9    | FOXP1   |
| chr3:180957818-180968254  | 11   | FXR1    |
| chr3:37289234-37296219    | 9    | GOLGA4  |
| chr3:148994141-148996904  | 16   | GYG1    |

|                           |     |           |
|---------------------------|-----|-----------|
| chr8:42906172-42930172    | 137 | HOOK3     |
| chr16:27346466-27352696   | 16  | IL4R      |
| chr8:94851552-94866191    | 5   | INTS8     |
| chr12:26595464-26602706   | 8   | ITPR2     |
| chr14:58482512-58487166   | 13  | KIAA0586  |
| chr10:69005731-69011015   | 10  | KIAA1279  |
| chr8:94495730-94499506    | 11  | KIAA1429  |
| chr6:116716218-116724375  | 27  | KPNA5     |
| chr4:41473004-41494606    | 8   | LIMCH1    |
| chr7:2002064-2014642      | 10  | MAD1L1    |
| chr14:50456515-50464133   | 14  | MAP4K5    |
| chr16:1743334-1748720     | 5   | MAPK8IP3  |
| chr5:94909250-94931991    | 7   | MCTP1     |
| chr6:83315309-83352139    | 7   | ME1       |
| chr13:23798723-23870195   | 11  | MIPEP     |
| chr13:23798723-23809924   | 41  | MIPEP     |
| chr9:20360741-20365744    | 18  | MLLT3     |
| chr2:197535529-197540437  | 12  | MOB4      |
| chr3:179592643-179598771  | 67  | MRPL47    |
| chr2:190659157-190670459  | 74  | NAB1      |
| chr7:140702865-140704963  | 188 | NDUFB2    |
| chr3:27256295-27293652    | 9   | NEK10     |
| chr12:103766734-103775630 | 27  | nogene    |
| chr1:156743256-156743444  | 21  | nogene    |
| chr17:45140564-45140752   | 15  | nogene    |
| chr1:155243879-155244335  | 33  | nogene    |
| chr7:6428268-6428596      | 16  | nogene    |
| chr6:42941509-42943970    | 18  | nogene    |
| chr11:29044444-29063536   | 19  | nogene    |
| chr2:10602775-10607311    | 18  | NOL10     |
| chr13:24490667-24503777   | 35  | PARP4     |
| chr8:51857492-51861246    | 12  | PCMTD1    |
| chr1:233236844-233252788  | 18  | PCNXL2    |
| chr16:71663898-71679535   | 4   | PHLPP2    |
| chr2:208333314-208348023  | 3   | PIKFYVE   |
| chr7:30045084-30049382    | 13  | PLEKHA8   |
| chr6:43587271-43587652    | 7   | POLH      |
| chr10:70204872-70218817   | 7   | PPA1      |
| chr9:112250928-112268195  | 14  | PTBP3     |
| chr8:140879470-140925749  | 124 | PTK2      |
| chr15:75523120-75527261   | 46  | PTPN9     |
| chr6:163455278-163478896  | 4   | QKI       |
| chr16:461403-489000       | 4   | RAB11FIP3 |

|                           |     |          |
|---------------------------|-----|----------|
| chr1:174275832-174305127  | 8   | RABGAP1L |
| chr5:132559283-132580066  | 5   | RAD50    |
| chr19:11415936-11417059   | 105 | RGL3     |
| chr8:53946664-53954310    | 10  | RGS20    |
| chr7:5711760-5739352      | 10  | RNF216   |
| chrX:84145477-84164387    | 15  | RPS6KA6  |
| chr10:68394074-68394451   | 81  | RUFY2    |
| chr11:9812531-9829496     | 3   | SBF2     |
| chr19:2765185-2769091     | 13  | SGTA     |
| chr19:430683-440932       | 86  | SHC2     |
| chr4:1694773-1703700      | 14  | SLBP     |
| chr13:29517330-29517572   | 13  | SLC7A1   |
| chr2:230357804-230361697  | 188 | SP140L   |
| chr3:136443286-136502779  | 13  | STAG1    |
| chr19:19316617-19320462   | 3   | SUGP1    |
| chr12:88160113-88176319   | 19  | TMTC3    |
| chr8:9580158-9580383      | 21  | TNKS     |
| chr3:133616813-133620347  | 9   | TOPBP1   |
| chr15:43441525-43470066   | 4   | TP53BP1  |
| chr19:13112704-13113011   | 3   | TRMT1    |
| chrX:101018970-101020588  | 53  | TRMT2B   |
| chr12:104309758-104327671 | 10  | TXNRD1   |
| chr1:162566011-162576981  | 9   | UAP1     |
| chr2:180982017-180984093  | 51  | UBE2E3   |
| chr15:43047160-43048491   | 16  | UBR1     |
| chr17:60181323-60185651   | 30  | USP32    |
| chr2:218558497-218562813  | 21  | USP37    |
| chr17:31865365-31875413   | 6   | UTP6     |
| chr6:144700086-144757989  | 9   | UTRN     |
| chr5:133990854-133991154  | 26  | VDAC1    |
| chr1:27414832-27428933    | 5   | WASF2    |
| chr2:61493893-61497007    | 25  | XPO1     |
| chr2:61498672-61533903    | 6   | XPO1     |
| chr20:21326278-21328670   | 39  | XRN2     |
| chr7:64814917-64820323    | 14  | ZNF138   |
| chr18:76849525-76851939   | 718 | ZNF236   |
| chr19:37080344-37091121   | 17  | ZNF420   |
| chr19:51880322-51886912   | 12  | ZNF577   |
| chr2:71355718-71380565    | 27  | ZNF638   |
| chr10:124942456-124966781 | 42  | ZRANB1   |
| chr3:47113875-47116754    | 12  | SETD2    |
| chr18:36026899-36033837   | 468 | RPRD1A   |
| chr16:15068168-15073080   | 25  | RRN3     |

|                           |     |          |
|---------------------------|-----|----------|
| chr3:196371895-196403019  | 57  | UBXN7    |
| chr5:168568645-168568998  | 107 | PANK3    |
| chr3:130996042-130999659  | 11  | ATP2C1   |
| chr7:107281299-107298346  | 81  | COG5     |
| chr5:116303529-116318300  | 8   | nogene   |
| chr6:100798712-100805880  | 188 | ASCC3    |
| chr5:65528451-65542848    | 36  | CENPK    |
| chrX:53557381-53559060    | 17  | HUWE1    |
| chr5:138372673-138381590  | 18  | KDM3B    |
| chr17:47656859-47658660   | 25  | KPNB1    |
| chr6:52267864-52273916    | 32  | MCM3     |
| chr19:19564932-19569584   | 45  | PBX4     |
| chr1:233198938-233227371  | 21  | PCNXL2   |
| chr1:244411286-244417752  | 7   | ADSS     |
| chr2:73534823-73573424    | 4   | ALMS1    |
| chr12:110025741-110029635 | 10  | ANKRD13A |
| chrX:63674037-63697304    | 4   | ARHGEF9  |
| chr9:91296020-91356155    | 33  | AUH      |
| chrX:154768301-154770879  | 18  | DKC1     |
| chr1:109582436-109586882  | 15  | GNAI3    |
| chr5:133070373-133076898  | 11  | HSPA4    |
| chrX:70341798-70343982    | 14  | KIF4A    |
| chr19:11106564-11110771   | 3   | LDLR     |
| chr10:101800241-101807901 | 6   | MGEA5    |
| chr21:45749380-45755452   | 4   | nogene   |
| chr4:39879727-39890364    | 19  | PDS5A    |
| chr6:128005083-128089992  | 4   | PTPRK    |
| chr1:174304985-174394145  | 14  | RABGAP1L |
| chr2:203489583-203491319  | 20  | RAPH1    |
| chr10:63610186-63619800   | 57  | REEP3    |
| chr2:32098795-32116212    | 86  | SPAST    |
| chr19:39453355-39453521   | 4   | SUPT5H   |
| chr3:17586352-17623913    | 8   | TBC1D5   |
| chr3:44361364-44367708    | 3   | TCAIM    |
| chr8:15650696-15673836    | 237 | TUSC3    |
| chr2:180982017-181063041  | 12  | UBE2E3   |
| chr6:89335301-89343756    | 12  | UBE2J1   |
| chr10:11929864-11952249   | 4   | UPF2     |
| chr13:41811224-41833531   | 78  | VWA8     |
| chr22:41338312-41339191   | 69  | ZC3H7B   |
| chr11:6941570-6943641     | 11  | ZNF215   |
| chr12:82965023-82966997   | 12  | TMTC2    |
| chr17:81511425-81512058   | 15  | nogene   |

|                          |      |            |
|--------------------------|------|------------|
| chr13:23358334-23371165  | 10   | SACS       |
| chr1:236824118-236838599 | 11   | MTR        |
| chrX:91414903-91418871   | 321  | PABPC5-AS1 |
| chr2:203380207-203391143 | 4    | ABI2       |
| chr19:6934986-6937648    | 5    | ADGRE1     |
| chr19:48182454-48182767  | 13   | C19orf68   |
| chr7:65756468-65758317   | 6    | CCT6P1     |
| chr14:24210347-24211829  | 70   | CHMP4A     |
| chr20:49066191-49072697  | 15   | CSE1L      |
| chr3:41224020-41239354   | 14   | CTNNB1     |
| chr15:65696365-65697383  | 3    | DENND4A    |
| chr15:65669778-65670188  | 7    | DENND4A    |
| chr15:65737706-65738875  | 18   | DENND4A    |
| chr22:46308149-46314013  | 4    | GTSE1      |
| chr21:33718796-33735204  | 95   | ITSN1      |
| chr9:6843548-6893232     | 4    | KDM4C      |
| chr17:62680453-62680777  | 6    | MRC2       |
| chr12:78159202-78181045  | 3    | NAV3       |
| chr19:10371558-10372100  | 9    | nogene     |
| chr2:131684708-131688303 | 13   | nogene     |
| chr11:77374327-77379994  | 99   | PAK1       |
| chr16:71714511-71714801  | 89   | PHLPP2     |
| chr1:109411876-109415363 | 13   | PSMA5      |
| chr20:34072065-34080072  | 14   | RALY       |
| chr11:77672041-77693611  | 11   | RSF1       |
| chr6:158146781-158158364 | 9    | SERAC1     |
| chr1:179341027-179348942 | 4    | SOAT1      |
| chr15:25405460-25411971  | 1138 | UBE3A      |
| chr7:157223253-157225539 | 144  | UBE3C      |
| chr1:21701497-21703618   | 43   | USP48      |
| chr1:151178000-151184493 | 21   | VPS72      |
| chr18:56731382-56781656  | 18   | WDR7       |
| chr1:52860730-52867777   | 17   | ZYG11A     |
| chr11:3771747-3773739    | 9    | NUP98      |
| chr14:58290698-58291707  | 9    | PSMA3-AS1  |
| chr2:32441328-32445668   | 5    | BIRC6      |
| chr1:111565307-111566042 | 6    | nogene     |
| chr19:35258944-35262692  | 3    | LSR        |
| chr10:68965376-68967203  | 8    | DDX21      |
| chr2:25607235-25639094   | 6    | DTNB       |
| chr1:21073462-21111383   | 3    | EIF4G3     |
| chr14:31127784-31129448  | 13   | HECTD1     |
| chr5:177280564-177288925 | 18   | NSD1       |

|                           |     |          |
|---------------------------|-----|----------|
| chr10:127982273-128049666 | 3   | PTPRE    |
| chr14:34567685-34568013   | 75  | SNX6     |
| chr19:34438644-34445121   | 46  | UBA2     |
| chr3:41789660-41835971    | 14  | ULK4     |
| chr11:103280347-103358359 | 26  | DYNC2H1  |
| chr3:194658956-194660133  | 14  | LSG1     |
| chr21:39269898-39274472   | 24  | BRWD1    |
| chr1:42773562-42775522    | 14  | C1orf50  |
| chr10:124405435-124412200 | 13  | OAT      |
| chr1:233090060-233139855  | 10  | PCNXL2   |
| chr17:3720876-3722221     | 13  | nogene   |
| chr12:31701862-31709425   | 3   | AMN1     |
| chr7:92343023-92352642    | 27  | ANKIB1   |
| chr11:76496214-76528466   | 52  | C11orf30 |
| chr6:89846561-89857199    | 134 | CASP8AP2 |
| chr1:15518109-15518395    | 16  | CASP9    |
| chr16:3740398-3751806     | 11  | CREBBP   |
| chr8:141155848-141168525  | 9   | DENND3   |
| chr7:105877180-105912638  | 3   | nogene   |
| chr16:8804766-8813106     | 12  | PMM2     |
| chr6:75634706-75670720    | 18  | SENP6    |
| chr4:42035274-42049479    | 11  | SLC30A9  |
| chr2:213310058-213375119  | 55  | SPAG16   |
| chr12:120782654-120784593 | 23  | SPPL3    |
| chr8:98663929-98707311    | 3   | STK3     |
| chr20:45366874-45410255   | 3   | SYS1     |
| chr10:67888881-67891554   | 3   | SIRT1    |
| chr14:89980539-89993483   | 11  | TDP1     |
| chr18:9927095-9937066     | 13  | VAPA     |
| chr7:32543140-32559464    | 31  | AVL9     |
| chr21:36281482-36292233   | 11  | DOPEY2   |
| chr8:42950387-42968214    | 7   | HOOK3    |
| chr15:55850541-55852543   | 5   | NEDD4    |
| chr3:61885966-61895136    | 5   | nogene   |
| chr17:28348018-28355876   | 19  | POLDIP2  |
| chr4:3422904-3428169      | 7   | RGS12    |
| chr15:42810613-42817097   | 75  | TTBK2    |
| chr5:57246299-57247215    | 33  | GPBP1    |
| chr6:135002733-135042126  | 14  | HBS1L    |
| chr16:50086214-50102435   | 18  | HEATR3   |
| chr3:131132744-131133956  | 14  | NEK11    |
| chr3:196779419-196782833  | 12  | PAK2     |
| chr15:90979157-90980389   | 29  | PRC1     |

|                           |     |             |
|---------------------------|-----|-------------|
| chr5:131455800-131462088  | 3   | RAPGEF6     |
| chr4:39081102-39086727    | 11  | KLHL5       |
| chr11:43327788-43335994   | 27  | API5        |
| chr11:13413529-13445181   | 247 | BTBD10      |
| chr4:113531215-113548729  | 17  | CAMK2D      |
| chr17:40291057-40291668   | 7   | CDC6        |
| chr10:80425865-80427496   | 13  | FAM213A     |
| chr5:134535857-134573762  | 10  | JADE2       |
| chr16:27211145-27215008   | 15  | KDM8        |
| chr7:105040838-105081797  | 5   | KMT2E       |
| chr6:116698703-116705160  | 256 | KPNA5       |
| chr12:50427761-50461347   | 21  | LARP4       |
| chr3:37047518-37051710    | 29  | MLH1        |
| chr5:41794002-41807438    | 471 | OXCT1       |
| chr10:73030270-73053590   | 10  | P4HA1       |
| chr16:482524-496859       | 34  | RAB11FIP3   |
| chr2:17738220-17745951    | 5   | SMC6        |
| chr20:17956932-17961326   | 131 | SNX5        |
| chr11:102186017-102206074 | 92  | YAP1        |
| chr19:9656546-9659467     | 26  | ZNF562      |
| chr5:112985834-113004077  | 137 | DCP2        |
| chr9:125326415-125330218  | 5   | GAPVD1      |
| chr20:5958527-5978017     | 13  | MCM8        |
| chr12:102099105-102112232 | 10  | NUP37       |
| chr4:120777187-120811449  | 4   | PRDM5       |
| chr6:52276267-52279599    | 4   | MCM3        |
| chr12:109938379-109939247 | 18  | GIT2        |
| chr15:75601137-75621056   | 4   | SNUPN       |
| chr14:34807450-34862322   | 19  | BAZ1A       |
| chr18:13008455-13019206   | 4   | CEP192      |
| chr12:42355160-42398994   | 99  | PPHLN1      |
| chr1:10433841-10442441    | 13  | APITD1-CORT |
| chr11:95812931-95828027   | 11  | CEP57       |
| chr12:101714089-101716812 | 97  | CHPT1       |
| chr16:4454810-4455780     | 11  | DNAJA3      |
| chr18:49257009-49282175   | 79  | DYM         |
| chr10:15833629-15847943   | 560 | FAM188A     |
| chr12:32598496-32611283   | 190 | FGD4        |
| chr9:125295457-125299106  | 15  | GAPVD1      |
| chr7:8022482-8071131      | 13  | GLCCI1      |
| chr8:41598291-41599304    | 150 | GPAT4       |
| chr16:1683508-1685587     | 4   | HN1L        |
| chr14:103405075-103408139 | 9   | MARK3       |

|                           |     |          |
|---------------------------|-----|----------|
| chr17:62029540-62052705   | 19  | MED13    |
| chr17:28132619-28172618   | 5   | NLK      |
| chr15:39860819-39874509   | 3   | nogene   |
| chr5:145703974-145704295  | 34  | nogene   |
| chr10:34269656-34269899   | 10  | PARD3    |
| chr13:28662409-28668574   | 9   | POMP     |
| chr9:112232098-112252788  | 14  | PTBP3    |
| chr1:41113282-41143112    | 143 | SCMH1    |
| chr14:61037058-61052135   | 9   | SLC38A6  |
| chr1:109342013-109345878  | 65  | SORT1    |
| chr6:42055530-42057513    | 5   | TAF8     |
| chr1:54040755-54043525    | 32  | TMEM59   |
| chr19:34430575-34438766   | 492 | UBA2     |
| chr11:75879878-75888903   | 6   | UVRAG    |
| chr15:29766265-29800702   | 38  | TJP1     |
| chr14:22950313-22955176   | 6   | HAUS4    |
| chr9:112403994-112418958  | 38  | HSDL2    |
| chr16:71915625-71917134   | 32  | IST1     |
| chr11:107308282-107311572 | 4   | nogene   |
| chr1:51772069-51772723    | 4   | OSBPL9   |
| chr3:15212103-15218540    | 12  | CAPN7    |
| chr1:201857095-201858994  | 15  | IPO9     |
| chr16:67865101-67868599   | 7   | NUTF2    |
| chr3:149895472-149921227  | 72  | RNF13    |
| chr3:197085579-197119530  | 128 | DLG1     |
| chr3:108605334-108616657  | 14  | DZIP3    |
| chr20:47276313-47283648   | 10  | ZMYND8   |
| chr16:70366084-70366861   | 15  | DDX19A   |
| chr20:48953555-48969277   | 12  | ARFGEF2  |
| chr10:101889411-101957732 | 15  | C10orf76 |
| chr8:67074242-67076581    | 43  | CSPP1    |
| chr19:1417499-1432690     | 32  | DAZAP1   |
| chr22:40552105-40594735   | 173 | MKL1     |
| chr10:21688490-21727928   | 12  | MLLT10   |
| chr6:97267871-97273062    | 3   | MMS22L   |
| chr12:98604589-98605290   | 28  | nogene   |
| chr15:77283882-77365225   | 11  | nogene   |
| chr14:49663314-49669598   | 11  | POLE2    |
| chr7:80765154-80805758    | 11  | SEMA3C   |
| chr12:46229152-46239893   | 26  | SLC38A1  |
| chr9:33504537-33509336    | 28  | SUGT1P1  |
| chr1:180834873-180863874  | 17  | XPR1     |
| chr8:134565332-134590355  | 10  | ZFAT     |



|                           |     |            |
|---------------------------|-----|------------|
| chr20:48953555-48976199   | 7   | ARFGEF2    |
| chr8:55941854-55953984    | 32  | LYN        |
| chr17:31939337-31939618   | 13  | nogene     |
| chr2:147972738-147982081  | 257 | ORC4       |
| chr5:94654629-94663908    | 5   | SLF1       |
| chr9:34241184-34242108    | 12  | UBAP1      |
| chr2:9344531-9358889      | 37  | ASAP2      |
| chr1:32386778-32387181    | 10  | BSDC1      |
| chr1:6806982-6825210      | 141 | CAMTA1     |
| chr2:207724799-207742342  | 58  | CCNYL1     |
| chr15:74918794-74929232   | 3   | COX5A      |
| chr22:31814991-31815212   | 4   | DEPDC5     |
| chr19:47716557-47717016   | 14  | EHD2       |
| chr6:167022408-167040339  | 35  | FGFR1OP    |
| chr11:128768117-128772985 | 6   | FLI1       |
| chr1:212863724-212888594  | 10  | FLVCR1     |
| chr16:70468848-70471352   | 11  | FUK        |
| chr2:190900563-190927482  | 5   | GLS        |
| chr19:33101494-33106899   | 4   | GPATCH1    |
| chr14:66681106-66688386   | 31  | GPHN       |
| chr16:11883014-11898035   | 6   | GSPT1      |
| chr11:28211061-28212331   | 7   | METTL15    |
| chr12:27719807-27724186   | 20  | MRPS35     |
| chr13:29242296-29281865   | 6   | MTUS2      |
| chr11:2949226-2979237     | 5   | NAP1L4     |
| chr17:60623520-60633977   | 209 | PPM1D      |
| chr1:43553491-43578920    | 45  | PTPRF      |
| chr11:114443855-114450166 | 9   | REXO2      |
| chr5:38990948-39021136    | 173 | RICTOR     |
| chr17:59910561-59914703   | 63  | RPS6KB1    |
| chr1:246735974-246744125  | 25  | SCCPDH     |
| chr11:107803000-107805515 | 5   | SLC35F2    |
| chr4:26620612-26720125    | 5   | TBC1D19    |
| chr19:51948592-51949235   | 33  | ZNF350-AS1 |
| chr1:229458160-229465519  | 9   | NUP133     |
| chr15:56373440-56412436   | 13  | TEX9       |
| chr2:151416560-151420379  | 12  | RIF1       |
| chr17:35594007-35608387   | 50  | AP2B1      |
| chr1:114463103-114477087  | 24  | TRIM33     |
| chr12:19493799-19493986   | 12  | AEBP2      |
| chr19:46918487-46922356   | 10  | ARHGAP35   |
| chr5:73749836-73776696    | 5   | ARHGEF28   |
| chr8:103040797-103055936  | 8   | ATP6V1C1   |

|                           |     |              |
|---------------------------|-----|--------------|
| chr20:51725818-51729978   | 100 | ATP9A        |
| chr7:105620199-105624267  | 4   | ATXN7L1      |
| chr10:35529972-35553185   | 11  | CCNY         |
| chr10:84425730-84464016   | 11  | CCSER2       |
| chr5:138198198-138202155  | 10  | CDC23        |
| chr7:39997493-40047877    | 42  | CDK13        |
| chr1:41008793-41010254    | 31  | CTPS1        |
| chr22:31845017-31846967   | 15  | DEPDC5       |
| chr17:56848695-56856625   | 192 | DGKE         |
| chr19:10135735-10136287   | 10  | DNMT1        |
| chr8:108203400-108229195  | 11  | EIF3E        |
| chr6:53273219-53276256    | 70  | ELOVL5       |
| chr3:37273535-37302332    | 38  | GOLGA4       |
| chr7:66551519-66576932    | 7   | GS1-124K5.11 |
| chr4:108009758-108028069  | 4   | HADH         |
| chr4:184418166-184419568  | 8   | IRF2         |
| chr3:183338799-183389779  | 102 | MCF2L2       |
| chr4:70950699-70959040    | 34  | MOB1B        |
| chr8:72052538-72062365    | 15  | MSC-AS1      |
| chr19:40209533-40210147   | 8   | nogene       |
| chr7:129258580-129338536  | 14  | nogene       |
| chr19:27493583-27494240   | 14  | nogene       |
| chr3:31639987-31647091    | 3   | nogene       |
| chrX:126243345-126287274  | 3   | nogene       |
| chr2:189791789-189805754  | 156 | PMS1         |
| chr10:102143044-102145090 | 3   | PPRC1        |
| chr1:171512031-171527844  | 3   | PPRC2C       |
| chr1:109409927-109421926  | 11  | PSMA5        |
| chr6:88928984-88941180    | 54  | RNGTT        |
| chr20:38040434-38059520   | 55  | RPRD1B       |
| chr11:4107434-4112062     | 19  | RRM1         |
| chr7:29940681-29955360    | 10  | SCRN1        |
| chr3:52954316-52969258    | 26  | SFMBT1       |
| chr17:29451454-29467216   | 28  | TAOK1        |
| chr16:89895989-89900794   | 10  | TCF25        |
| chr3:129827802-129880562  | 5   | TMCC1        |
| chr7:66352504-66360109    | 12  | TPST1        |
| chr7:98890334-98897866    | 17  | TRRAP        |
| chr14:75863666-75902224   | 84  | TTL5         |
| chr3:179690240-179730709  | 4   | USP13        |
| chr8:143465716-143475585  | 13  | ZC3H3        |
| chr13:19959957-20006586   | 3   | ZMYM2        |
| chr19:9535187-9536356     | 15  | ZNF426       |

|                           |      |           |
|---------------------------|------|-----------|
| chr5:78955294-78969192    | 35   | ARSB      |
| chr14:77464597-77468508   | 33   | AHSA1     |
| chr19:41256451-41257629   | 9    | AXL       |
| chr17:81053667-81057967   | 25   | BAIAP2    |
| chr18:12999420-13019206   | 1067 | CEP192    |
| chr1:197652234-197674169  | 58   | DENND1B   |
| chr20:34089515-34098633   | 8    | EIF2S2    |
| chr6:24777221-24781621    | 14   | GMNN      |
| chr19:33113766-33114419   | 87   | GPATCH1   |
| chr17:6620787-6635171     | 4    | KIAA0753  |
| chr2:97671330-97675928    | 4    | LINC01125 |
| chr4:70958873-70975286    | 10   | MOB1B     |
| chr7:156676385-156680574  | 9    | nogene    |
| chr4:143865970-143982026  | 24   | nogene    |
| chrX:1378321-1378812      | 9    | nogene    |
| chr19:43925141-43926500   | 9    | nogene    |
| chr7:129630077-129727365  | 10   | NRF1      |
| chr11:821957-824436       | 10   | PNPLA2    |
| chr3:184301536-184306834  | 10   | PSMD2     |
| chr2:86740926-86766024    | 6    | RMND5A    |
| chr19:47143493-47153040   | 6    | SAE1      |
| chr19:5609994-5613527     | 14   | SAFB2     |
| chr9:105714365-105722621  | 9    | TMEM38B   |
| chr6:42592150-42606651    | 36   | UBR2      |
| chrX:152457249-152468299  | 24   | nogene    |
| chrX:78122834-78123374    | 17   | PGK1      |
| chr3:58256561-58267345    | 16   | ABHD6     |
| chr1:246863923-246867811  | 63   | AHCTF1    |
| chr1:243664771-243843282  | 15   | AKT3      |
| chr20:29091593-29100460   | 53   | FRG1DP    |
| chr4:150798080-150848998  | 17   | LRBA      |
| chr9:42978850-42986862    | 9    | nogene    |
| chr5:37351189-37358151    | 8    | NUP155    |
| chr14:71036064-71052012   | 9    | PCNX      |
| chr17:7499038-7503791     | 4    | POLR2A    |
| chr11:65649560-65650051   | 10   | SIPA1     |
| chr17:51020158-51021365   | 10   | SPAG9     |
| chr12:111513356-111555919 | 33   | ATXN2     |
| chrX:102834627-102865152  | 18   | LINC00630 |
| chr13:45408926-45411480   | 10   | SLC25A30  |
| chrX:24161714-24179770    | 8    | ZFX       |
| chr19:45355664-45357699   | 55   | ERCC2     |
| chr1:77801330-77859056    | 10   | FAM73A    |

|                           |     |           |
|---------------------------|-----|-----------|
| chr16:67685456-67685802   | 128 | GFOD2     |
| chr11:77938650-77961138   | 31  | INTS4     |
| chr2:127763061-127771004  | 83  | WDR33     |
| chr19:36145805-36146312   | 12  | CAPNS1    |
| chr1:181002605-181005463  | 64  | STX6      |
| chr14:64065431-64065650   | 18  | SYNE2     |
| chr8:52668020-52686967    | 29  | RB1CC1    |
| chr1:243293090-243330692  | 19  | SDCCAG8   |
| chr2:235883344-235908906  | 34  | AGAP1     |
| chr1:1478643-1482614      | 5   | ATAD3B    |
| chr14:67340439-67347453   | 9   | ATP6V1D   |
| chr10:118685982-118695230 | 4   | CACUL1    |
| chr1:230659463-230664587  | 16  | COG2      |
| chr9:83780381-83806560    | 4   | GKAP1     |
| chr8:94849461-94859632    | 13  | INTS8     |
| chr19:5047475-5047669     | 36  | KDM4B     |
| chr14:49709158-49723952   | 7   | KLHDC1    |
| chr4:150735257-150897818  | 94  | LRBA      |
| chr1:30721287-30721722    | 12  | MATN1-AS1 |
| chr2:131125752-131140275  | 16  | PLEKHB2   |
| chr3:141260122-141287453  | 11  | PXYLP1    |
| chr14:35625360-35635598   | 16  | RALGAPA1  |
| chr12:56433025-56434231   | 30  | TIMELESS  |
| chr1:230928936-230961303  | 9   | TTC13     |
| chr8:48034865-48049978    | 10  | UBE2V2    |
| chrX:68511848-68522917    | 50  | YIPF6     |
| chr5:801099-821895        | 12  | ZDHHC11   |
| chr20:47276313-47276795   | 17  | ZMYND8    |
| chr1:35892556-35895269    | 4   | AGO1      |
| chr11:120469287-120477526 | 13  | ARHGEF12  |
| chr11:108267170-108267342 | 57  | ATM       |
| chr22:17655661-17696210   | 9   | BCL2L13   |
| chr22:41808874-41810000   | 143 | CCDC134   |
| chr14:24211414-24211829   | 46  | CHMP4A    |
| chr10:14922980-14935564   | 10  | DCLRE1C   |
| chr1:28038838-28058094    | 9   | EYA3      |
| chr4:3182353-3189093      | 4   | HTT       |
| chr2:238185180-238194870  | 41  | ILKAP     |
| chr2:148922136-148942760  | 12  | KIF5C     |
| chr17:64786566-64797409   | 11  | PLEKHM1P  |
| chr3:50105076-50105709    | 19  | RBM5      |
| chr3:149895472-149912083  | 5   | RNF13     |
| chr17:55031167-55047154   | 90  | STXBP4    |

|                           |    |           |
|---------------------------|----|-----------|
| chr10:94474667-94477829   | 11 | TBC1D12   |
| chr5:160035139-160051183  | 77 | TTC1      |
| chr18:163307-166819       | 10 | USP14     |
| chr21:15762890-15778027   | 8  | USP25     |
| chr11:102186017-102206086 | 24 | YAP1      |
| chr15:90067109-90068595   | 32 | ZNF710    |
| chr11:34970138-34984728   | 80 | PDHX      |
| chr12:56604216-56605327   | 38 | BAZ2A     |
| chr5:614469-624579        | 21 | CEP72     |
| chr1:3865811-3872572      | 10 | DFFB      |
| chr1:224952669-224955098  | 3  | DNAH14    |
| chr5:171845505-171847749  | 11 | nogene    |
| chr8:17064083-17085318    | 9  | MICU3     |
| chr19:37089038-37096115   | 13 | ZNF420    |
| chr7:104183942-104204234  | 8  | ORC5      |
| chr19:36449230-36450001   | 17 | ZNF566    |
| chr1:52854464-52857749    | 7  | ZYG11A    |
| chr2:65239851-65255694    | 29 | ACTR2     |
| chr14:70946914-70962331   | 8  | PCNX      |
| chr17:81275968-81277133   | 11 | SLC38A10  |
| chr15:85664562-85669830   | 20 | AKAP13    |
| chr14:34794748-34795765   | 10 | BAZ1A     |
| chr17:81700466-81701717   | 9  | HGS       |
| chr13:29024456-29034125   | 29 | MTUS2     |
| chr4:103548742-103569402  | 5  | nogene    |
| chr20:320504-322565       | 4  | NRSN2-AS1 |
| chr1:43604189-43604880    | 12 | PTPRF     |
| chr1:154588550-154597267  | 7  | ADAR      |
| chr15:89865494-89889140   | 9  | AP3S2     |
| chr14:45006007-45012075   | 5  | FAM179B   |
| chr1:153663214-153664474  | 8  | ILF2      |
| chr7:86938125-86965024    | 11 | KIAA1324L |
| chr8:127806368-127807862  | 9  | nogene    |
| chr4:148259977-148436862  | 3  | NR3C2     |
| chr21:15011169-15043574   | 10 | NRIP1     |
| chr7:129005015-129018157  | 24 | TNPO3     |
| chr5:32414968-32420103    | 13 | ZFR       |
| chr10:32469384-32474023   | 16 | CCDC7     |
| chr14:88726540-88746283   | 33 | EML5      |
| chr21:33534578-33539356   | 77 | GART      |
| chr9:539515-540667        | 13 | KANK1     |
| chr2:177505505-177523805  | 24 | AGPS      |
| chr11:72709869-72711499   | 74 | ARAP1     |

|                           |    |           |
|---------------------------|----|-----------|
| chr20:48972325-48973284   | 11 | ARFGEF2   |
| chr7:2364371-2369682      | 8  | EIF3B     |
| chr22:41530686-41540795   | 74 | POLR3H    |
| chr2:11249660-11288449    | 18 | ROCK2     |
| chr15:76764960-76767088   | 13 | SCAPER    |
| chr4:75967276-75982037    | 14 | SDAD1     |
| chr5:65704278-65713064    | 3  | SGTB      |
| chr2:27677294-27677924    | 32 | SLC4A1AP  |
| chr1:112555867-112616895  | 3  | ST7L      |
| chr17:37437737-37442652   | 10 | TADA2A    |
| chr12:104309758-104311412 | 15 | TXNRD1    |
| chr15:75868950-75883424   | 11 | UBE2Q2    |
| chr3:9797658-9801756      | 9  | ARPC4     |
| chr3:151185329-151193666  | 24 | MED12L    |
| chr1:11090553-11091597    | 25 | EXOSC10   |
| chr5:37024584-37027412    | 5  | NIPBL     |
| chr20:38531166-38532859   | 62 | RALGAPB   |
| chr7:151477332-151491014  | 26 | RHEB      |
| chr17:653290-655953       | 18 | VPS53     |
| chr1:32631826-32634110    | 99 | ZBTB8OS   |
| chr15:59677910-59682514   | 5  | BNIP2     |
| chr12:68824362-68824651   | 11 | MDM2      |
| chr10:5801206-5801463     | 20 | nogene    |
| chr11:119013742-119014300 | 15 | nogene    |
| chr12:28204092-28226199   | 7  | nogene    |
| chr13:24452405-24456478   | 5  | PARP4     |
| chr16:68249289-68252653   | 11 | PLA2G15   |
| chr11:74634582-74636275   | 5  | POLD3     |
| chrX:37406208-37426000    | 31 | PRRG1     |
| chr12:50996816-51010766   | 5  | SLC11A2   |
| chr14:60982507-61030523   | 5  | SLC38A6   |
| chr5:27472382-27477801    | 4  | LINC01021 |
| chr19:9658224-9693820     | 47 | ZNF812    |
| chr6:17539268-17551604    | 9  | CAP2      |
| chr7:886055-891066        | 9  | GET4      |
| chr15:28292887-28299516   | 36 | HERC2     |
| chr13:49719774-49746993   | 4  | KPNA3     |
| chr13:24484652-24498229   | 30 | PARP4     |
| chr2:43428099-43527988    | 10 | THADA     |
| chr5:151452342-151479489  | 27 | SLC36A1   |
| chr19:12658062-12658510   | 13 | MAN2B1    |
| chr2:197535529-197550386  | 4  | MOB4      |
| chr17:42614843-42666484   | 19 | TUBG1     |

|                           |     |           |
|---------------------------|-----|-----------|
| chr3:191380158-191396033  | 9   | CCDC50    |
| chr16:66808520-66810772   | 11  | NAE1      |
| chr17:68039239-68039966   | 11  | nogene    |
| chr2:219714256-219715412  | 13  | nogene    |
| chrX:136847804-136848582  | 17  | nogene    |
| chr17:37440504-37465541   | 28  | TADA2A    |
| chr4:16238770-16323036    | 16  | TAPT1-AS1 |
| chr10:71977690-71978149   | 5   | nogene    |
| chr10:79201583-79216274   | 17  | ZMIZ1     |
| chr17:60679452-60808076   | 18  | BCAS3     |
| chr9:95880868-95882340    | 11  | ERCC6L2   |
| chr18:12535475-12635096   | 17  | SPIRE1    |
| chr19:32643122-32643631   | 40  | ANKRD27   |
| chr22:31462931-31463967   | 9   | EIF4ENIF1 |
| chr3:12379703-12381491    | 9   | PPARG     |
| chr7:129839206-129880971  | 5   | UBE2H     |
| chr12:102025973-102046119 | 40  | CCDC53    |
| chr2:175114689-175121540  | 3   | ATF2      |
| chr9:16435554-16437524    | 16  | BNC2      |
| chr10:68747160-68747566   | 56  | CCAR1     |
| chr17:30792439-30793672   | 19  | CRLF3     |
| chr10:35060873-35071339   | 301 | CUL2      |
| chr17:59573739-59575471   | 12  | DHX40     |
| chr10:127037718-127061776 | 6   | DOCK1     |
| chr3:51089242-51160702    | 14  | DOCK3     |
| chr1:50535368-50596216    | 62  | FAF1      |
| chr1:212863724-212895354  | 9   | FLVCR1    |
| chr14:31127784-31133675   | 137 | HECTD1    |
| chr8:42906172-42943445    | 218 | HOOK3     |
| chr1:200581200-200592240  | 11  | KIF14     |
| chr6:116689319-116705160  | 100 | KPNA5     |
| chr11:68423488-68426187   | 33  | LRP5      |
| chr9:36630298-36651877    | 4   | MELK      |
| chr2:31994209-31994411    | 3   | nogene    |
| chr17:28917284-28921808   | 25  | PHF12     |
| chr7:10990702-11062085    | 5   | PHF14     |
| chr20:35913248-35914197   | 20  | PHF20     |
| chr10:22567850-22609717   | 10  | PIP4K2A   |
| chr1:153626319-153632240  | 11  | S100A13   |
| chrX:119410189-119426354  | 184 | SLC25A43  |
| chr6:85517755-85533800    | 5   | SNX14     |
| chr11:65034846-65035663   | 5   | SNX15     |
| chr8:47284027-47300097    | 4   | SPIDR     |

|                          |     |         |
|--------------------------|-----|---------|
| chr1:112591524-112616895 | 17  | ST7L    |
| chr3:125277725-125313656 | 39  | ZNF148  |
| chr17:37149863-37181356  | 11  | ACACA   |
| chr20:3540221-3549338    | 9   | ATRN    |
| chr13:59879228-59924870  | 4   | DIAPH3  |
| chr3:9973627-9977446     | 23  | EMC3    |
| chr9:20948270-20953065   | 8   | FOCAD   |
| chr2:241262710-241268541 | 14  | HDLBP   |
| chr4:142260491-142314762 | 7   | INPP4B  |
| chr11:77955941-77981576  | 68  | INTS4   |
| chr1:89712708-89713273   | 6   | LRR8C   |
| chr9:131430093-131432794 | 23  | PRRC2B  |
| chr15:32643585-32644359  | 3   | SCG5    |
| chr20:17952586-17954223  | 5   | SNX5    |
| chr18:12463350-12464958  | 70  | SPIRE1  |
| chrX:68513326-68522917   | 3   | YIPF6   |
| chr15:72544819-72561549  | 9   | ARIH1   |
| chr11:13413529-13421838  | 360 | BTBD10  |
| chr6:47526627-47554766   | 70  | CD2AP   |
| chr1:23750844-23752518   | 41  | TCEB3   |
| chr16:696772-697419      | 132 | FBXL16  |
| chr15:40383227-40392023  | 27  | KNSTRN  |
| chr9:131508910-131521472 | 5   | POMT1   |
| chrX:23721880-23736016   | 57  | ACOT9   |
| chr16:28829400-28831072  | 10  | ATXN2L  |
| chr14:73736997-73737297  | 17  | ELMSAN1 |
| chr6:5771290-5775316     | 50  | FARS2   |
| chr12:68828770-68836749  | 41  | MDM2    |
| chr10:21713771-21735235  | 18  | MLLT10  |
| chr1:224281122-224303857 | 11  | NVL     |
| chr3:30623198-30650460   | 20  | TGFBR2  |
| chr1:52877681-52892975   | 106 | ZYG11A  |
| chr15:41356038-41365589  | 36  | NUSAP1  |
| chr1:1485015-1520306     | 17  | ATAD3B  |
| chr15:93000511-93014909  | 36  | CHD2    |
| chr9:128522667-128523846 | 7   | GLE1    |
| chr9:6814630-6893232     | 10  | KDM4C   |
| chr6:167870385-167880517 | 25  | MLLT4   |
| chr4:39745751-39777810   | 10  | UBE2K   |
| chr16:70258979-70261157  | 11  | AARS    |
| chr5:115831693-115837764 | 28  | ATG12   |
| chr17:75042180-75042659  | 13  | ATP5H   |
| chr16:56509956-56514680  | 11  | BBS2    |



|                           |     |          |
|---------------------------|-----|----------|
| chr10:76036007-76047303   | 11  | C10orf11 |
| chr16:72020713-72021311   | 7   | DHODH    |
| chr1:44339044-44352925    | 17  | ERI3     |
| chr5:151786602-151795575  | 18  | G3BP1    |
| chr16:4332214-4333519     | 250 | GLIS2    |
| chr1:153664042-153668557  | 16  | ILF2     |
| chr17:46170854-46177272   | 3   | KANSL1   |
| chr3:44794216-44794426    | 10  | KIF15    |
| chr2:30459551-30476635    | 10  | LCLAT1   |
| chr22:29970975-29979052   | 75  | MTMR3    |
| chr11:134184636-134185526 | 25  | NCAPD3   |
| chr1:32322539-32323027    | 13  | nogene   |
| chr3:15013588-15014174    | 21  | NR2C2    |
| chr18:22975152-22984990   | 29  | RBBP8    |
| chr18:22989220-23001729   | 10  | RBBP8    |
| chr12:51684173-51688849   | 12  | SCN8A    |
| chr5:134674614-134682482  | 33  | SEC24A   |
| chr13:29535818-29553860   | 27  | SLC7A1   |
| chr1:151638887-151683445  | 30  | SNX27    |
| chr10:94441895-94451609   | 12  | TBC1D12  |
| chr5:176943334-176970866  | 12  | UIMC1    |
| chr2:63484603-63492940    | 63  | WDPCP    |
| chr12:19473247-19500221   | 193 | AEBP2    |
| chr12:26911177-26917733   | 4   | ASUN     |
| chr10:7796120-7800091     | 9   | ATP5C1   |
| chr7:32544693-32554596    | 31  | AVL9     |
| chr17:43099774-43104956   | 42  | BRCA1    |
| chr2:73239642-73240543    | 9   | CCT7     |
| chr2:29121373-29152828    | 7   | CLIP4    |
| chr11:70405264-70409960   | 18  | CTTN     |
| chr11:107348936-107353736 | 10  | CWF19L2  |
| chr7:770470-780144        | 21  | DNAAF5   |
| chr1:225231072-225266769  | 5   | DNAH14   |
| chr10:110506934-110510596 | 19  | DUSP5    |
| chr1:44319627-44339322    | 29  | ERI3     |
| chr16:1822299-1823037     | 10  | HAGH     |
| chr7:11038759-11062085    | 5   | PHF14    |
| chr4:70762518-70778438    | 12  | RUFY3    |
| chr13:29553760-29554673   | 13  | SLC7A1   |
| chr8:70583163-70587176    | 4   | TRAM1    |
| chr1:19183810-19185286    | 56  | UBR4     |
| chr13:95985238-95996135   | 34  | UGGT2    |
| chr3:49324701-49335596    | 9   | USP4     |

|                           |     |          |
|---------------------------|-----|----------|
| chr12:62500782-62508480   | 16  | MON2     |
| chr5:179709872-179716294  | 99  | CANX     |
| chr21:36344578-36349408   | 8   | MORC3    |
| chr1:44701178-44707389    | 15  | nogene   |
| chr17:81588943-81600427   | 26  | NPLOC4   |
| chr14:75717860-75720703   | 37  | TTLL5    |
| chr15:59202325-59214720   | 5   | MYO1E    |
| chr5:126568258-126577211  | 9   | ALDH7A1  |
| chr1:224952669-225007544  | 513 | DNAH14   |
| chr8:127982359-127989291  | 20  | PVT1     |
| chr19:34431860-34438766   | 218 | UBA2     |
| chr3:128902552-128904505  | 4   | ACAD9    |
| chr11:129093620-129124894 | 29  | ARHGAP32 |
| chr3:48922747-48980496    | 13  | ARIH2    |
| chr12:110340658-110342448 | 56  | ATP2A2   |
| chr1:222725449-222730177  | 12  | BROX     |
| chr1:108939635-108944057  | 13  | CLCC1    |
| chr7:50755886-50762014    | 11  | GRB10    |
| chr20:16404812-16429982   | 10  | KIF16B   |
| chr9:130186716-130187780  | 10  | nogene   |
| chr5:14219408-14222930    | 14  | nogene   |
| chr18:20991175-20992937   | 16  | ROCK1    |
| chr17:29676819-29695523   | 9   | SSH2     |
| chr17:28358915-28360847   | 13  | TMEM199  |
| chr11:108131906-108135242 | 29  | ACAT1    |
| chr14:103752999-103797518 | 4   | PPP1R13B |
| chr3:185617479-185624082  | 15  | SENP2    |
| chr14:68921005-68925672   | 12  | ACTN1    |
| chr3:192727180-192745356  | 19  | FGF12    |
| chr12:120151144-120151391 | 21  | GCN1     |
| chr11:68567013-68571104   | 3   | PPP6R3   |
| chr2:9845219-9876018      | 19  | TAF1B    |
| chr22:18126353-18127034   | 3   | TUBA8    |
| chr7:106251069-106254504  | 10  | NAMPT    |
| chr4:78826036-78851056    | 140 | BMP2K    |
| chr12:122216487-122224644 | 11  | DIABLO   |
| chr4:53383772-53391139    | 35  | FIP1L1   |
| chr2:9475986-9488392      | 8   | IAH1     |
| chr4:165228806-165238899  | 5   | KLHL2    |
| chr14:50466582-50476306   | 34  | MAP4K5   |
| chr17:36507162-36507398   | 16  | MYO19    |
| chr8:93922015-94020460    | 18  | PDP1     |
| chr21:44855209-44861271   | 611 | PTTG1IP  |

|                           |     |          |
|---------------------------|-----|----------|
| chr2:85647929-85648853    | 4   | USP39    |
| chr19:13817215-13819492   | 4   | ZSWIM4   |
| chr15:58621470-58643978   | 24  | ADAM10   |
| chr6:88890494-88941180    | 59  | RNGTT    |
| chrX:71388236-71389665    | 16  | TAF1     |
| chr16:46677314-46679156   | 13  | VPS35    |
| chr2:202464808-202520201  | 6   | BMPR2    |
| chr12:118019071-118020985 | 13  | RFC5     |
| chr5:134782944-134785586  | 9   | DDX46    |
| chr3:120770727-120776664  | 14  | GTF2E1   |
| chr10:58216144-58237814   | 48  | IPMK     |
| chr2:28850327-28861308    | 57  | TRMT61B  |
| chrX:131768548-131794466  | 13  | FIRRE    |
| chr3:47435007-47443091    | 176 | SCAP     |
| chr2:48328560-48362707    | 23  | FOXN2    |
| chr16:16121974-16125911   | 21  | ABCC1    |
| chr18:12363781-12371691   | 51  | AFG3L2   |
| chr8:140580904-140585311  | 11  | AGO2     |
| chr9:85618982-85657643    | 12  | AGTPBP1  |
| chr6:109641517-109662663  | 11  | AK9      |
| chr5:112766325-112767390  | 40  | APC      |
| chr7:51190849-51193589    | 10  | COBL     |
| chr1:155717005-155726019  | 86  | DAP3     |
| chr10:419064-472549       | 8   | DIP2C    |
| chr11:85598656-85626753   | 20  | DLG2     |
| chr12:12519861-12521463   | 100 | DUSP16   |
| chr2:43776781-43794643    | 9   | DYNC2LI1 |
| chr17:19281954-19283714   | 26  | EPN2     |
| chr2:241373083-241373290  | 13  | FARP2    |
| chr4:173224309-173248440  | 9   | GALNT7   |
| chr1:153667554-153668557  | 51  | ILF2     |
| chr4:128121825-128179512  | 5   | LARP1B   |
| chr7:156762133-156796492  | 3   | LMBR1    |
| chr1:39444661-39448763    | 10  | MACF1    |
| chr10:27158548-27159758   | 9   | MASTL    |
| chr12:62543096-62553174   | 5   | MON2     |
| chr12:78127166-78140334   | 21  | NAV3     |
| chr2:183001952-183023916  | 26  | NCKAP1   |
| chr7:128579998-128615970  | 11  | nogene   |
| chr8:124456518-124457437  | 28  | nogene   |
| chr22:17595276-17595631   | 30  | nogene   |
| chr20:62276203-62276962   | 13  | nogene   |
| chr2:10600852-10668723    | 10  | NOL10    |

|                           |     |         |
|---------------------------|-----|---------|
| chr1:5927648-5933329      | 17  | NPHP4   |
| chr3:38216095-38236961    | 12  | OXR1    |
| chr14:105348492-105355177 | 52  | PACS2   |
| chr1:113726417-113738799  | 14  | PHTF1   |
| chr10:122392302-122413045 | 38  | PLEKHA1 |
| chr10:11851996-11852215   | 17  | PROSER2 |
| chr6:138943512-138947913  | 11  | REPS1   |
| chr5:78388836-78459362    | 27  | SCAMP1  |
| chr8:47394977-47407961    | 21  | SPIDR   |
| chr17:29676819-29684684   | 16  | SSH2    |
| chr9:81610219-81620557    | 10  | TLE1    |
| chr3:189215291-189238909  | 17  | TPRG1   |
| chr8:140368017-140405698  | 8   | TRAPPC9 |
| chr8:102360070-102391161  | 6   | UBR5    |
| chr5:37437921-37605238    | 10  | WDR70   |
| chrX:75421863-75431520    | 5   | ZDHHC15 |
| chr7:112286872-112296311  | 7   | ZNF277  |
| chr17:4021128-4022828     | 5   | ZZEF1   |
| chr18:12356693-12371691   | 105 | AFG3L2  |
| chr8:53814661-53829533    | 3   | ATP6V1H |
| chrX:77988241-78003236    | 19  | ATP7A   |
| chr2:61872081-61880394    | 5   | CCT4    |
| chr21:37472683-37480826   | 4   | DYRK1A  |
| chr12:112258495-112264212 | 11  | HECTD4  |
| chr12:109447066-109451813 | 7   | KCTD10  |
| chr22:21788256-21805945   | 27  | MAPK1   |
| chrX:150614588-150649901  | 10  | MTM1    |
| chr2:45677831-45701491    | 5   | nogene  |
| chr15:79411399-79413557   | 10  | nogene  |
| chr5:41739389-41807438    | 15  | OXCT1   |
| chr16:14606483-14627336   | 18  | PARN    |
| chr6:63694580-63700466    | 49  | PHF3    |
| chr11:65649756-65650051   | 35  | SIPA1   |
| chr15:50747494-50749746   | 28  | SPPL2A  |
| chr14:77576766-77579109   | 67  | SPTLC2  |
| chr4:56483138-56484864    | 4   | SRP72   |
| chr9:15210087-15214249    | 8   | TTC39B  |
| chrX:118404337-118407026  | 9   | WDR44   |
| chrX:68518769-68521497    | 5   | YIPF6   |
| chr7:100019230-100024307  | 10  | ZKSCAN1 |
| chr2:159224231-159225779  | 4   | TANC1   |
| chr11:94568729-94577492   | 19  | PIWIL4  |
| chr14:69116365-69122360   | 275 | DCAF5   |

|                            |     |          |
|----------------------------|-----|----------|
| chr12:1289851-1316187      | 5   | ERC1     |
| chr2:27607844-27608039     | 65  | ZNF512   |
| chr6:170317369-170323259   | 56  | FAM120B  |
| chr11:28058925-28059161    | 12  | KIF18A   |
| chrX:118392631-118395344   | 15  | WDR44    |
| chr4:102689573-102714561   | 10  | MANBA    |
| chr10:419064-486530        | 8   | DIP2C    |
| chr13:32319076-32326613    | 21  | BRCA2    |
| chr1:70296129-70313790     | 7   | ANKRD13C |
| chr4:73085248-73092300     | 64  | ANKRD17  |
| chr17:60500398-60509375    | 7   | APPBP2   |
| chr1:155360300-155395553   | 12  | ASH1L    |
| chr1:77801330-77843407     | 55  | FAM73A   |
| chr7:77376847-77404615     | 12  | GSAP     |
| chr9:94438400-94441099     | 11  | HIATL1   |
| chr1:32160614-32167296     | 3   | KPNA6    |
| chr2:8882510-8958642       | 9   | MBOAT2   |
| chr16:68121986-68158068    | 26  | NFATC3   |
| chr1:235985378-235993872   | 12  | NID1     |
| chr5:171028871-171034980   | 10  | nogene   |
| chr4:103328124-103437842   | 10  | nogene   |
| chr11:65502289-65504595    | 8   | nogene   |
| chr3:146110284-146124229   | 37  | PLOD2    |
| chr5:40771718-40777586     | 11  | PRKAA1   |
| chr3:184305767-184306834   | 20  | PSMD2    |
| chr18:12825809-12859254    | 24  | PTPN2    |
| chr19:33002246-33003000    | 72  | RHPN2    |
| chr7:23505745-23507535     | 227 | TRA2A    |
| chr17:21006895-21021226    | 9   | USP22    |
| chr11:113799145-113799415  | 20  | USP28    |
| chr7:26725427-26739964     | 9   | SKAP2    |
| chr7:105565276-105565648   | 4   | RINT1    |
| chr17:14074322-14077056    | 49  | COX10    |
| chr2:190244886-190252307   | 43  | HIBCH    |
| chr6:3076763-3089657       | 13  | RIPK1    |
| chr17:82127691-82128597    | 21  | CCDC57   |
| chrUn_KI270467v1:2263-2842 | 39  | nogene   |
| chr3:51229511-51237590     | 15  | DOCK3    |
| chrX:134473358-134475364   | 8   | HPRT1    |
| chr20:58343717-58359735    | 17  | RAB22A   |
| chrX:97072940-97141794     | 13  | DIAPH2   |
| chr3:197081050-197105005   | 5   | DLG1     |
| chr8:140347756-140365686   | 10  | nogene   |

|                           |    |         |
|---------------------------|----|---------|
| chr2:20307977-20312423    | 8  | PUM2    |
| chr3:19950805-19951061    | 34 | RAB5A   |
| chr17:59880893-59891041   | 17 | TUBD1   |
| chr11:62632564-62639731   | 9  | GANAB   |
| chr8:116747331-116747881  | 33 | nogene  |
| chr16:22308147-22309510   | 7  | POLR3E  |
| chr10:63380317-63414899   | 76 | JMJD1C  |
| chrX:77520787-77523401    | 25 | ATRX    |
| chr19:47718508-47736533   | 5  | EHD2    |
| chr11:22674849-22726433   | 19 | GAS2    |
| chr12:120173652-120174169 | 6  | GCN1    |
| chr3:47062162-47067118    | 19 | SETD2   |
| chr22:25354595-25381578   | 4  | LRP5L   |
| chr19:2271781-2273160     | 5  | OAZ1    |
| chr8:47440322-47440542    | 65 | SPIDR   |
| chr10:100990435-100991054 | 6  | C10orf2 |
| chr1:20893516-20895501    | 26 | EIF4G3  |
| chr5:78508061-78510398    | 6  | LHFPL2  |
| chr22:17145023-17149745   | 34 | CECR5   |
| chr8:47777685-47785317    | 5  | PRKDC   |
| chrX:136876502-136878086  | 15 | RBMX    |
| chr3:71437213-71493555    | 3  | FOXP1   |
| chr2:43586400-43592416    | 11 | THADA   |
| chr2:178339671-178374027  | 5  | OSBPL6  |
| chr21:15799756-15811210   | 11 | USP25   |
| chr1:184706642-184711877  | 16 | EDEM3   |
| chr14:45120886-45130800   | 7  | FKBP3   |
| chr2:10396834-10423088    | 4  | HPCAL1  |
| chr14:50247040-50303017   | 6  | L2HGDH  |
| chr12:110503805-110506693 | 11 | RAD9B   |
| chr6:10898014-10907684    | 11 | SYCP2L  |
| chr3:125277725-125288228  | 9  | ZNF148  |
| chr2:175092542-175121540  | 15 | ATF2    |
| chr13:77015408-77021861   | 3  | FBXL3   |
| chr5:181239486-181241639  | 3  | GNB2L1  |
| chr7:93303459-93311272    | 41 | VPS50   |
| chr3:37335052-37347296    | 9  | GOLGA4  |
| chr14:103405075-103411765 | 10 | MARK3   |
| chr16:66805776-66810772   | 9  | NAE1    |
| chr17:2292551-2292977     | 4  | SMG6    |
| chr5:77463094-77464809    | 13 | WDR41   |
| chr1:63629424-63654466    | 12 | PGM1    |
| chr5:65260599-65473952    | 13 | ADAMTS6 |

|                          |      |           |
|--------------------------|------|-----------|
| chr7:102757853-102761411 | 5    | FAM185A   |
| chr10:995928-1007128     | 13   | GTPBP4    |
| chr17:49805362-49811574  | 16   | KAT7      |
| chr1:58714831-58715641   | 16   | nogene    |
| chr8:17589467-17589765   | 23   | PDGFRL    |
| chrX:53411994-53412253   | 13   | SMC1A     |
| chr15:44733249-44733404  | 13   | nogene    |
| chr1:35972023-35973511   | 33   | AGO3      |
| chr19:57790972-57791802  | 10   | nogene    |
| chr1:151423396-151442205 | 4    | POGZ      |
| chr4:38035587-38054338   | 20   | TBC1D1    |
| chr17:82582740-82587272  | 77   | FOXK2     |
| chr8:47969797-47976866   | 31   | MCM4      |
| chr20:62256056-62272259  | 20   | OSBPL2    |
| chr7:22219865-22318037   | 14   | RAPGEF5   |
| chr7:45063917-45069961   | 9    | CCM2      |
| chr10:11481769-11527567  | 14   | USP6NL    |
| chr1:94961316-94963170   | 7    | LOC729970 |
| chr7:131375423-131445903 | 26   | MKLN1     |
| chr14:49832050-49834449  | 13   | NEMF      |
| chr20:2947981-2975241    | 7    | PTPRA     |
| chr1:47287550-47300152   | 35   | STIL      |
| chr6:72880876-72897142   | 82   | nogene    |
| chr17:40289407-40291668  | 4    | CDC6      |
| chr6:96523145-96528632   | 10   | UFL1      |
| chr2:172568740-172596023 | 68   | PDK1      |
| chr3:32703867-32717237   | 10   | CNOT10    |
| chr21:36263545-36270157  | 12   | DOPEY2    |
| chr7:128626294-128631869 | 6    | nogene    |
| chr2:54974694-54987698   | 16   | RTN4      |
| chr5:55343330-55351029   | 32   | SKIV2L2   |
| chrX:123885630-123892773 | 14   | XIAP      |
| chr1:161778243-161802272 | 57   | ATF6      |
| chr4:105719059-105729499 | 46   | GSTCD     |
| chr19:6742966-6743836    | 13   | TRIP10    |
| chr16:68053563-68056424  | 11   | DUS2      |
| chr2:110649233-110661841 | 18   | BUB1      |
| chr16:72368652-72391215  | 24   | LINC01572 |
| chr8:89937025-89946295   | 42   | NBN       |
| chr1:232479626-232493660 | 4    | SIPA1L2   |
| chr2:36396613-36442735   | 1118 | CRIM1     |
| chr9:95101614-95111637   | 50   | FANCC     |
| chr3:10213206-10213548   | 13   | IRAK2     |

|                           |     |          |
|---------------------------|-----|----------|
| chr13:41761127-41833531   | 17  | VWA8     |
| chr3:196361843-196368155  | 9   | UBXN7    |
| chr3:38221577-38236961    | 10  | OXSR1    |
| chr13:77205255-77212160   | 9   | MYCBP2   |
| chr5:145472609-145473315  | 9   | nogene   |
| chr14:71009633-71023232   | 9   | PCNX     |
| chr17:28917284-28927063   | 20  | PHF12    |
| chr1:25340473-25343073    | 9   | TMEM50A  |
| chr5:618989-620261        | 300 | CEP72    |
| chr17:64571797-64606640   | 57  | SMURF2   |
| chr17:37179259-37193415   | 37  | ACACA    |
| chr10:63264650-63455089   | 12  | JMJD1C   |
| chr15:43814500-43815074   | 20  | MFAP1    |
| chr13:95177706-95188542   | 18  | ABCC4    |
| chr2:127873827-127874272  | 9   | AMMECR1L |
| chr12:132734384-132735512 | 71  | ANKLE2   |
| chr4:147965023-148023413  | 10  | ARHGAP10 |
| chr5:179853196-179853437  | 5   | C5orf45  |
| chr1:6820180-6825210      | 43  | CAMTA1   |
| chr7:26202970-26206510    | 3   | CBX3     |
| chr20:63926541-63931022   | 20  | DNAJC5   |
| chr19:18537600-18538433   | 123 | FKBP8    |
| chr10:102362474-102363798 | 27  | GBF1     |
| chr11:18281949-18288013   | 4   | HPS5     |
| chr12:122568260-122574380 | 9   | KNTC1    |
| chr12:122582704-122584990 | 11  | KNTC1    |
| chr9:124301935-124313985  | 123 | NEK6     |
| chr12:19283279-19283745   | 16  | PLEKHA5  |
| chr1:166840954-166849526  | 3   | POGK     |
| chr2:55581566-55588956    | 14  | PPP4R3B  |
| chr17:80263573-80273404   | 38  | RNF213   |
| chr21:43686803-43688240   | 23  | RRP1B    |
| chr15:38299372-38324809   | 55  | SPRED1   |
| chr12:111965594-111991889 | 6   | TMEM116  |
| chr2:178591138-178608266  | 11  | TTN-AS1  |
| chr19:21309245-21310627   | 4   | ZNF708   |
| chr1:175986942-175989479  | 71  | RFWD2    |
| chr5:160010499-160049662  | 4   | TTC1     |
| chr12:133083102-133083561 | 29  | ZNF140   |
| chr4:189864592-189895643  | 12  | nogene   |
| chr7:22960255-22984045    | 37  | FAM126A  |
| chr19:38162252-38164906   | 75  | SIPA1L3  |
| chr1:15638306-15646984    | 5   | DDI2     |



|                           |     |              |
|---------------------------|-----|--------------|
| chr4:2657802-2690970      | 29  | FAM193A      |
| chr11:18400836-18403811   | 19  | LDHA         |
| chr3:111945267-111962312  | 9   | PHLDB2       |
| chr8:123359220-123361646  | 354 | ATAD2        |
| chr2:241654545-241655343  | 5   | ATG4B        |
| chr13:102807145-102822159 | 26  | BIVM         |
| chr3:191357087-191361159  | 86  | CCDC50       |
| chr12:32718642-32722633   | 23  | DNM1L        |
| chr10:5903019-5927541     | 10  | FBXO18       |
| chr9:130593642-130595588  | 8   | FUBP3        |
| chr2:238173533-238185287  | 40  | ILKAP        |
| chr13:46723220-46733998   | 63  | LRCH1        |
| chr16:48548006-48562444   | 18  | N4BP1        |
| chr4:87441828-87454455    | 5   | NUDT9        |
| chr5:102948377-102950820  | 6   | PAM          |
| chr8:102212775-102232304  | 18  | RRM2B        |
| chr4:128970377-129003876  | 6   | SCLT1        |
| chr6:157867546-157875176  | 72  | SNX9         |
| chr19:41341882-41342247   | 50  | TGFB1        |
| chr12:56430880-56432524   | 41  | TIMELESS     |
| chr17:15488180-15503232   | 21  | TVP23C       |
| chr20:50096671-50098981   | 8   | UBE2V1       |
| chr6:144531051-144557311  | 4   | UTRN         |
| chr17:29676819-29703062   | 31  | SSH2         |
| chr4:39755656-39777810    | 8   | UBE2K        |
| chr2:28901986-28914208    | 30  | WDR43        |
| chr7:32548846-32552295    | 9   | AVL9         |
| chrX:136241159-136244795  | 25  | MAP7D3       |
| chr3:57657679-57663716    | 9   | DENND6A      |
| chr19:12207331-12209431   | 9   | LOC100289333 |
| chr6:53505391-53509250    | 14  | GCLC         |
| chr7:99434789-99435268    | 5   | PTCD1        |
| chr12:98527885-98547671   | 5   | TMPO         |
| chr10:68722454-68749685   | 15  | CCAR1        |
| chr7:131443480-131445903  | 10  | MKLN1        |
| chr14:77673559-77675794   | 10  | nogene       |
| chr20:62286582-62289330   | 74  | OSBPL2       |
| chr18:9195550-9211784     | 4   | ANKRD12      |
| chr17:42480666-42494473   | 4   | ATP6V0A1     |
| chr3:5195208-5208263      | 16  | EDEM1        |
| chr10:97437190-97441259   | 4   | EXOSC1       |
| chrX:2345070-2345915      | 39  | nogene       |
| chr1:224296500-224303857  | 10  | NVL          |

|                           |     |          |
|---------------------------|-----|----------|
| chr11:77353535-77359017   | 14  | PAK1     |
| chr10:78002196-78004888   | 4   | POLR3A   |
| chr14:103778744-103798868 | 16  | PPP1R13B |
| chr1:176027571-176136547  | 15  | RFWD2    |
| chr16:70526586-70530917   | 70  | SF3B3    |
| chr10:17660463-17673078   | 12  | STAM     |
| chr3:183736717-183754365  | 14  | YEATS2   |
| chr1:203828298-203840374  | 3   | ZC3H11A  |
| chr10:121836717-121924329 | 19  | ATE1     |
| chr1:225185290-225192911  | 9   | DNAH14   |
| chr2:222599927-222643005  | 14  | FARSB    |
| chr13:77217839-77243951   | 31  | MYCBP2   |
| chr14:35625360-35627951   | 10  | RALGAPA1 |
| chr15:44651490-44660616   | 10  | SPG11    |
| chr19:4408902-4409759     | 47  | CHAF1A   |
| chr2:224528946-224557856  | 23  | CUL3     |
| chr9:127243078-127313559  | 4   | GARNL3   |
| chr16:47497398-47580358   | 8   | PHKB     |
| chr4:78826036-78833687    | 58  | BMP2K    |
| chr1:215573785-215579999  | 10  | KCTD3    |
| chr20:32366383-32371876   | 21  | ASXL1    |
| chr2:32607454-32611582    | 38  | BIRC6    |
| chr22:49787389-49804360   | 25  | BRD1     |
| chr9:120477349-120491477  | 3   | CDK5RAP2 |
| chr3:138525489-138572932  | 3   | CEP70    |
| chr19:852208-861956       | 12  | CFD      |
| chr1:53313572-53326992    | 3   | LRP8     |
| chr4:39841947-39849652    | 3   | PDS5A    |
| chr17:64821766-64822393   | 43  | PLEKHM1P |
| chr8:47794289-47798397    | 3   | PRKDC    |
| chr1:27105884-27109777    | 29  | SLC9A1   |
| chr14:34586229-34597645   | 3   | SNX6     |
| chr8:73603725-73688813    | 3   | STAU2    |
| chr2:63404047-63404657    | 21  | WDPCP    |
| chr8:123371669-123380677  | 26  | ATAD2    |
| chr6:161034258-161049979  | 134 | MAP3K4   |
| chr1:85164525-85178272    | 7   | SYDE2    |
| chr19:47409098-47409547   | 11  | MEIS3    |
| chr4:183183402-183193708  | 35  | WWC2     |
| chr18:79143801-79176907   | 7   | ATP9B    |
| chr10:91994534-91997751   | 24  | BTAFL1   |
| chr2:36396613-36522313    | 28  | CRIM1    |
| chr8:103430611-103435790  | 47  | DCAF13   |

|                          |     |         |
|--------------------------|-----|---------|
| chr7:152263015-152273867 | 14  | KMT2C   |
| chr2:63604695-63606028   | 36  | MDH1    |
| chr6:75817500-75822851   | 9   | MYO6    |
| chr5:115221823-115241606 | 37  | PGGT1B  |
| chrX:134377571-134393952 | 12  | PHF6    |
| chr3:146206525-146222092 | 9   | PLSCR4  |
| chr9:70350113-70350471   | 6   | SMC5    |
| chr4:185247293-185310816 | 38  | SNX25   |
| chr12:49486249-49490731  | 25  | SPATS2  |
| chr17:82884144-82906053  | 12  | TBCD    |
| chr17:62052536-62063301  | 9   | MED13   |
| chr3:43299753-43343478   | 10  | SNRK    |
| chr5:69254601-69262304   | 10  | CDK7    |
| chr7:152800530-152801731 | 32  | ACTR3B  |
| chr22:45718412-45740538  | 33  | ATXN10  |
| chrX:130071039-130072417 | 11  | ELF4    |
| chr2:28929578-28947161   | 13  | WDR43   |
| chr14:80504911-80530886  | 25  | CEP128  |
| chr1:156782281-156787174 | 16  | PRCC    |
| chr9:15497596-15498177   | 13  | nogene  |
| chr4:39320382-39323417   | 17  | RFC1    |
| chr17:623532-628231      | 7   | VPS53   |
| chr3:155829687-155842619 | 36  | SLC33A1 |
| chr5:133980728-133993018 | 14  | VDAC1   |
| chr17:4952794-4953845    | 42  | ENO3    |
| chr5:138006989-138021197 | 144 | FAM13B  |
| chr17:47663088-47674782  | 36  | KPNB1   |
| chr6:89753511-89762530   | 8   | MDN1    |
| chr11:65635528-65636307  | 33  | PCNXL3  |
| chr19:34454259-34464131  | 20  | UBA2    |
| chr8:99481598-99521010   | 11  | VPS13B  |
| chr12:71626259-71629037  | 96  | ZFC3H1  |
| chr8:130118160-130126089 | 40  | ASAP1   |
| chr19:10154292-10155056  | 40  | DNMT1   |
| chr1:108914337-108929975 | 5   | GPSM2   |
| chr4:128121825-128122188 | 14  | LARP1B  |
| chr11:3691346-3693375    | 10  | NUP98   |
| chr7:130173631-130175638 | 10  | TMEM209 |
| chr2:201140356-201164084 | 10  | CFLAR   |
| chr1:85350414-85358847   | 334 | DDAH1   |
| chr7:65979385-65980409   | 14  | GUSB    |
| chr18:7032065-7046367    | 6   | LAMA1   |
| chr5:32263112-32276742   | 8   | MTMR12  |

|                           |     |          |
|---------------------------|-----|----------|
| chr7:99054789-99061837    | 18  | SMURF1   |
| chr4:67720421-67730170    | 23  | UBA6-AS1 |
| chr6:43562246-43567354    | 91  | XPO5     |
| chr9:109087172-109108570  | 31  | TMEM245  |
| chr17:1050049-1100735     | 42  | ABR      |
| chr3:195306510-195308837  | 19  | ACAP2    |
| chr1:244415980-244424387  | 8   | ADSS     |
| chr11:62535944-62536567   | 163 | AHNAK    |
| chr4:73113791-73125312    | 6   | ANKRD17  |
| chr19:32643122-32646615   | 6   | ANKRD27  |
| chr3:43561219-43574864    | 14  | ANO10    |
| chr5:112775628-112801383  | 37  | APC      |
| chr17:60460662-60462061   | 116 | APPBP2   |
| chr14:74692040-74692328   | 16  | AREL1    |
| chr6:156826684-156829421  | 18  | ARID1B   |
| chr12:110326389-110328017 | 14  | ATP2A2   |
| chr10:73719159-73721504   | 13  | BMS1P4   |
| chr7:140794307-140834872  | 10  | BRAF     |
| chr11:66796280-66828364   | 18  | C11orf80 |
| chr13:110683050-110705571 | 10  | CARS2    |
| chr11:83278725-83280260   | 17  | CCDC90B  |
| chr12:28305648-28328191   | 5   | CCDC91   |
| chr6:31148404-31154799    | 9   | CCHCR1   |
| chr7:90726566-90747775    | 41  | CDK14    |
| chr7:90726566-90790652    | 98  | CDK14    |
| chr18:13104983-13117643   | 10  | CEP192   |
| chr16:69150536-69150904   | 82  | CIRH1A   |
| chr6:154422505-154422983  | 12  | CNKSR3   |
| chr20:49076979-49091022   | 10  | CSE1L    |
| chr20:49067189-49070297   | 14  | CSE1L    |
| chr8:67172415-67177726    | 11  | CSPP1    |
| chr3:47840876-47843255    | 27  | DHX30    |
| chr1:209830107-209831043  | 33  | DIEXF    |
| chr3:197161639-197194589  | 149 | DLG1     |
| chr10:77824383-77830873   | 10  | DLG5     |
| chr1:225080378-225097239  | 4   | DNAH14   |
| chr10:99898085-99900066   | 29  | DNMBP    |
| chr15:35410834-35484507   | 11  | DPH6     |
| chr8:94766611-94770571    | 9   | DPY19L4  |
| chr19:3979454-3979807     | 18  | EEF2     |
| chr11:10803029-10806047   | 25  | EIF4G2   |
| chr2:99394266-99394883    | 4   | EIF5B    |
| chr1:16148377-16149047    | 10  | EPHA2    |

|                           |     |          |
|---------------------------|-----|----------|
| chr12:1408148-1444750     | 9   | ERC1     |
| chr10:92893348-92920050   | 36  | EXOC6    |
| chr2:72718102-72741469    | 85  | EXOC6B   |
| chr10:15212471-15214601   | 33  | FAM171A1 |
| chr4:2657802-2672372      | 54  | FAM193A  |
| chr1:224115713-224134212  | 14  | FBXO28   |
| chr5:108897658-108898132  | 12  | FER      |
| chr6:109715077-109735298  | 10  | FIG4     |
| chr1:240206798-240294883  | 83  | FMN2     |
| chr17:59257121-59267174   | 24  | GDPD1    |
| chr19:3110148-3119359     | 9   | GNA11    |
| chr9:77922160-77931856    | 38  | GNAQ     |
| chr1:1825396-1839238      | 17  | GNB1     |
| chr19:33093358-33094269   | 38  | GPATCH1  |
| chr9:37424844-37432138    | 14  | GRHPR    |
| chr4:108009758-108014588  | 12  | HADH     |
| chr6:82231717-82240843    | 20  | IBTK     |
| chr5:5436417-5454638      | 6   | ICE1     |
| chr8:42325969-42329214    | 106 | IKBKB    |
| chr16:19730429-19735450   | 6   | IQCK     |
| chr20:34440154-34449480   | 18  | ITCH     |
| chr11:67215339-67231960   | 6   | KDM2A    |
| chr9:111433232-111444494  | 30  | KIAA0368 |
| chr16:27749583-27750306   | 28  | KIAA0556 |
| chr18:36946248-36959435   | 33  | KIAA1328 |
| chr7:138908990-138912460  | 15  | KIAA1549 |
| chr5:109817272-109866994  | 10  | MAN2A1   |
| chr15:67646230-67664645   | 35  | MAP2K5   |
| chr10:92333469-92340803   | 12  | 5-Mar    |
| chr6:73428708-73440445    | 4   | MB21D1   |
| chr1:84937754-84952530    | 20  | MCOLN2   |
| chr17:39423326-39424738   | 21  | MED1     |
| chr15:99598429-99602109   | 5   | MEF2A    |
| chr7:131373709-131399433  | 27  | MKLN1    |
| chr6:151009818-151037117  | 89  | MTHFD1L  |
| chr1:11124497-11133197    | 4   | MTOR     |
| chr15:72007825-72032588   | 11  | MYO9A    |
| chr13:41316845-41320824   | 8   | NAA16    |
| chr12:112078187-112087801 | 9   | NAA25    |
| chr16:66805776-66806026   | 32  | NAE1     |
| chr11:2969802-2979237     | 184 | NAP1L4   |
| chr20:36680815-36688784   | 16  | NDRG3    |
| chr6:41079028-41084192    | 23  | NFYA     |

|                          |    |          |
|--------------------------|----|----------|
| chr1:9972017-9975775     | 4  | NMNAT1   |
| chr17:35468136-35468822  | 25 | nogene   |
| chr7:66847121-66848666   | 18 | nogene   |
| chr6:83809633-83841697   | 7  | nogene   |
| chr8:144174844-144175564 | 7  | nogene   |
| chr6:126521536-126571600 | 4  | nogene   |
| chr1:222827427-222835215 | 10 | nogene   |
| chr7:23509726-23510355   | 10 | nogene   |
| chr1:63478764-63494287   | 13 | nogene   |
| chr4:13336892-13361633   | 6  | nogene   |
| chr9:2720343-2782846     | 20 | nogene   |
| chr3:67041864-67042057   | 4  | nogene   |
| chr16:89515789-89516473  | 10 | nogene   |
| chr7:32722722-32726470   | 19 | nogene   |
| chr5:10681378-10682305   | 14 | nogene   |
| chr6:52665273-52666878   | 32 | nogene   |
| chr14:73282358-73297285  | 14 | NUMB     |
| chr5:14673641-14681624   | 27 | OTULIN   |
| chr3:38221577-38230430   | 78 | OXSRI    |
| chr17:2676504-2680320    | 5  | PAFAH1B1 |
| chr10:49832802-49869555  | 91 | PARG     |
| chr13:24441845-24447186  | 51 | PARP4    |
| chr1:233025145-233057290 | 16 | PCNXL2   |
| chr6:42968289-42969987   | 7  | PEX6     |
| chr3:48543579-48550234   | 8  | PFKFB4   |
| chr3:138663905-138699095 | 14 | PIK3CB   |
| chr12:11047019-11129363  | 16 | PRH1     |
| chr8:140746759-140761262 | 10 | PTK2     |
| chr8:140752231-140764290 | 13 | PTK2     |
| chr7:155678607-155680908 | 63 | RBM33    |
| chr9:4823530-4827033     | 18 | RCL1     |
| chr7:151477332-151498180 | 14 | RHEB     |
| chr15:41438320-41457876  | 9  | RTF1     |
| chr15:41452900-41457876  | 4  | RTF1     |
| chr2:199308759-199328910 | 4  | SATB2    |
| chr1:243304712-243344331 | 61 | SDCCAG8  |
| chr4:25144773-25159107   | 13 | SEPSECS  |
| chr2:109564365-109567976 | 29 | 10-Sep   |
| chr9:132278069-132281574 | 13 | SETX     |
| chr16:46603538-46608389  | 5  | SHCBP1   |
| chr11:26678711-26686544  | 10 | SLC5A12  |
| chr3:47693240-47701402   | 10 | SMARCC1  |
| chr1:246327200-246335474 | 34 | SMYD3    |

|                           |     |           |
|---------------------------|-----|-----------|
| chr2:45546731-45585774    | 10  | SRBD1     |
| chr1:29148079-29154910    | 23  | SRSF4     |
| chr11:126406095-126409411 | 12  | ST3GAL4   |
| chr1:112597970-112616895  | 30  | ST7L      |
| chr6:159783940-159788143  | 27  | TCP1      |
| chr9:79652589-79654075    | 9   | TLE4      |
| chr3:129832773-129880559  | 26  | TMCC1     |
| chr20:41112781-41114155   | 6   | TOP1      |
| chr18:31890734-31917667   | 12  | TRAPPC8   |
| chr6:80027884-80035417    | 6   | TTK       |
| chr3:23499607-23532701    | 12  | UBE2E2    |
| chr2:169905113-169933008  | 11  | UBR3      |
| chr16:21957234-21962885   | 5   | UQCRC2    |
| chr19:30012284-30012531   | 5   | URI1      |
| chr1:77729859-77739417    | 9   | USP33     |
| chr6:144482208-144488834  | 23  | UTRN      |
| chr3:184924861-184971752  | 10  | VPS8      |
| chr6:110100525-110108681  | 4   | WASF1     |
| chr13:26612960-26671989   | 19  | WASF3     |
| chr1:108991253-108995837  | 4   | WDR47     |
| chr16:74948518-74965822   | 12  | WDR59     |
| chr19:47081512-47094608   | 6   | ZC3H4     |
| chr1:31310043-31339048    | 21  | ZCCHC17   |
| chr10:45662579-45663842   | 45  | ZFAND4    |
| chr1:35093913-35110447    | 15  | ZMYM1     |
| chr17:32362913-32368014   | 51  | ZNF207    |
| chr9:106938915-106984409  | 3   | ZNF462    |
| chr7:30323641-30324302    | 17  | ZNRF2     |
| chr1:52856997-52864157    | 25  | ZYG11A    |
| chr3:56566593-56567053    | 324 | CCDC66    |
| chr1:197553021-197772932  | 11  | DENND1B   |
| chr22:47686199-47704747   | 64  | LOC284930 |
| chr11:116896252-116927380 | 11  | SIK3      |
| chr19:12714820-12715739   | 200 | TNPO2     |
| chr11:77619605-77629899   | 371 | CLNS1A    |
| chr6:56670640-56704369    | 35  | DST       |
| chr3:96866824-96987993    | 5   | EPHA6     |
| chr6:5368549-5369182      | 51  | FARS2     |
| chr8:144357139-144357438  | 10  | FBXL6     |
| chr1:59321535-59332032    | 13  | FGGY      |
| chr14:35126734-35127611   | 36  | KIAA0391  |
| chr6:89781398-89781592    | 9   | MDN1      |
| chr11:93788000-93794035   | 53  | MED17     |

|                           |     |         |
|---------------------------|-----|---------|
| chr15:78887268-78894230   | 21  | MORF4L1 |
| chr1:145405097-145589039  | 11  | NBPF20  |
| chr2:53919150-53921104    | 5   | PSME4   |
| chr9:112268048-112276013  | 18  | PTBP3   |
| chr6:75621531-75647801    | 18  | SENP6   |
| chr12:40028300-40092933   | 20  | SLC2A13 |
| chrX:101018970-101019403  | 45  | TRMT2B  |
| chr21:37144524-37147603   | 10  | TTC3    |
| chr4:82447919-82451245    | 11  | ENOPH1  |
| chr19:11169876-11170248   | 3   | KANK2   |
| chr1:27789561-27801815    | 21  | STX12   |
| chr3:160356012-160381718  | 74  | IFT80   |
| chr2:196292564-196308085  | 5   | HECW2   |
| chr10:27012881-27014711   | 19  | ANKRD26 |
| chr8:38128290-38128951    | 20  | ASH2L   |
| chr5:37114959-37125409    | 27  | C5orf42 |
| chr22:37496448-37510421   | 4   | CARD10  |
| chr11:119296917-119297481 | 8   | CBL     |
| chr7:121266226-121271430  | 7   | CPED1   |
| chr1:26446315-26460144    | 35  | DHDDS   |
| chr2:25576837-25628384    | 9   | DTNB    |
| chr1:21050865-21111383    | 252 | EIF4G3  |
| chr12:11752449-11853561   | 11  | ETV6    |
| chr12:110485077-110487943 | 170 | FAM216A |
| chr3:172251259-172262083  | 148 | FNDC3B  |
| chr7:42148225-42223295    | 17  | GLI3    |
| chr22:23659864-23686995   | 55  | GUSBP11 |
| chr9:112438430-112441770  | 8   | HSDL2   |
| chr11:77928341-77981576   | 3   | INTS4   |
| chrX:19407187-19464406    | 4   | MAP3K15 |
| chr17:29165941-29167021   | 10  | MYO18A  |
| chr12:78006418-78021862   | 18  | NAV3    |
| chr2:18644169-18665115    | 6   | nogene  |
| chr5:135074416-135075388  | 10  | nogene  |
| chr1:207815928-207817414  | 141 | nogene  |
| chr5:15579089-15580812    | 3   | nogene  |
| chr16:14552020-14584791   | 21  | PARN    |
| chr11:111754498-111759951 | 5   | PPP2R1B |
| chr2:99421498-99435941    | 6   | REV1    |
| chr16:66528993-66541953   | 13  | TK2     |
| chr3:69029814-69035115    | 9   | TMF1    |
| chr7:23507419-23516528    | 9   | TRA2A   |
| chr14:54966474-54967394   | 52  | WDHD1   |



|                           |     |                 |
|---------------------------|-----|-----------------|
| chr4:1892165-1893909      | 13  | WHSC1           |
| chr9:14672829-14680162    | 29  | ZDHHC21         |
| chr18:76849525-76855201   | 173 | ZNF236          |
| chr2:100566502-100569721  | 24  | PDCL3           |
| chr17:60207020-60209543   | 6   | USP32           |
| chr3:184936245-184957521  | 9   | VPS8            |
| chr8:70583163-70598255    | 20  | TRAM1           |
| chr14:71658332-71672622   | 10  | SIPA1L1         |
| chr7:36410513-36411166    | 25  | ANLN            |
| chr14:102963060-102964650 | 7   | CDC42BPB        |
| chr15:44331987-44380976   | 20  | CASC4           |
| chr9:111440371-111444494  | 20  | KIAA0368        |
| chr6:167914167-167925091  | 10  | MLLT4           |
| chr7:103303841-103304490  | 106 | PMPCB           |
| chr4:105437949-105456745  | 9   | PPA2            |
| chr6:10907541-10912927    | 10  | SYCP2L          |
| chr6:121317494-121321794  | 5   | TBC1D32         |
| chr10:125038996-125040877 | 4   | CTBP2           |
| chr10:100174207-100179247 | 10  | ERLIN1          |
| chr1:89843637-89846658    | 18  | LRRC8D          |
| chr11:134206598-134210454 | 9   | NCAPD3          |
| chr5:168561392-168566266  | 8   | PANK3           |
| chr11:94583447-94589232   | 21  | PIWIL4          |
| chr1:151166933-151167414  | 181 | TNFAIP8L2-SCNM1 |
| chr19:51573209-51581882   | 27  | ZNF175          |
| chr18:21761441-21779685   | 29  | MIB1            |
| chr15:20669467-20683500   | 3   | NBEAP1          |
| chr3:136398748-136477412  | 9   | STAG1           |
| chr19:51860903-51880877   | 73  | ZNF577          |
| chr9:71874613-71875083    | 16  | ABHD17B         |
| chr1:36036176-36043548    | 8   | AGO3            |
| chr3:43549719-43565727    | 45  | ANO10           |
| chr4:41100638-41143142    | 18  | APBB2           |
| chr4:152829624-152888307  | 14  | ARFIP1          |
| chr5:142879373-142913293  | 12  | ARHGAP26        |
| chr8:130179263-130180880  | 21  | ASAP1           |
| chr2:215325240-215333457  | 9   | ATIC            |
| chr3:130992950-131001344  | 9   | ATP2C1          |
| chr7:73462921-73470483    | 9   | BAZ1B           |
| chr2:32478634-32493667    | 42  | BIRC6           |
| chr9:16727796-16738485    | 17  | BNC2            |
| chr21:39278742-39298582   | 16  | BRWD1           |
| chr7:7238254-7243750      | 9   | C1GALT1         |

|                           |     |           |
|---------------------------|-----|-----------|
| chr20:3340503-3359593     | 9   | C20orf194 |
| chr9:94759648-94801002    | 10  | C9orf3    |
| chr9:114636989-114638726  | 24  | C9orf91   |
| chr19:10391262-10391706   | 7   | CDC37     |
| chr21:36397414-36402851   | 10  | CHAF1B    |
| chr9:121161855-121162271  | 13  | CNTRL     |
| chr19:18759550-18760228   | 12  | CRTC1     |
| chr15:64259200-64300723   | 6   | CSNK1G1   |
| chr11:118759921-118763306 | 21  | DDX6      |
| chr10:68450027-68470163   | 10  | DNA2      |
| chr14:74004604-74015930   | 9   | ENTPD5    |
| chr2:26364301-26367220    | 20  | EPT1      |
| chr10:87151349-87158155   | 20  | FAM35A    |
| chr1:77801330-77815231    | 358 | FAM73A    |
| chr16:89758576-89767237   | 6   | FANCA     |
| chr5:108341926-108367953  | 29  | FBXL17    |
| chr4:53379224-53399839    | 5   | FIP1L1    |
| chr3:172247532-172298787  | 13  | FNDC3B    |
| chr14:30597419-30602131   | 13  | G2E3      |
| chr1:168104476-168104894  | 48  | GPR161    |
| chr22:23705428-23709867   | 94  | GUSBP11   |
| chr2:26269952-26277160    | 9   | HADHB     |
| chr2:26263379-26277160    | 182 | HADHB     |
| chr5:150036635-150041969  | 4   | HMGXB3    |
| chr7:23342063-23346062    | 40  | IGF2BP3   |
| chr6:149597062-149598350  | 10  | KATNA1    |
| chr15:34145397-34148750   | 12  | KATNBL1   |
| chr1:23050386-23057565    | 28  | KDM1A     |
| chr12:362962-376724       | 7   | KDM5A     |
| chr10:32022139-32023036   | 14  | KIF5B     |
| chr17:47663088-47665158   | 21  | KPNB1     |
| chr12:50430494-50454417   | 12  | LARP4     |
| chr1:200368664-200374246  | 8   | LINC00862 |
| chr4:150282449-150286034  | 9   | LRBA      |
| chr2:33020908-33021206    | 14  | LTBP1     |
| chr1:117493146-117502970  | 81  | MAN1A2    |
| chr2:227328677-227329783  | 10  | MFF       |
| chr6:97151770-97186690    | 4   | MMS22L    |
| chr2:74165217-74172752    | 36  | MOB1A     |
| chr10:133395712-133419592 | 8   | MTG1      |
| chr22:29970975-29998857   | 29  | MTMR3     |
| chr2:176296859-176326901  | 9   | MTX2      |
| chr12:112087682-112093136 | 4   | NAA25     |

|                           |     |            |
|---------------------------|-----|------------|
| chr1:236011920-236048989  | 8   | NID1       |
| chr5:34179012-34182867    | 289 | nogene     |
| chr2:183316754-183334209  | 16  | nogene     |
| chr6:43598542-43599089    | 18  | nogene     |
| chrX:121090398-121151724  | 4   | nogene     |
| chr8:128009589-128074291  | 4   | nogene     |
| chrX:131364748-131389148  | 36  | nogene     |
| chr5:73447242-73448206    | 20  | nogene     |
| chr12:68692486-68692844   | 19  | nogene     |
| chr7:19020901-19056165    | 28  | nogene     |
| chr3:185417467-185418306  | 24  | nogene     |
| chrX:131364748-131399704  | 45  | nogene     |
| chr11:14296054-14356769   | 23  | nogene     |
| chr2:111208487-111208936  | 9   | nogene     |
| chr21:15014343-15015225   | 9   | NRIP1      |
| chr10:79691621-79692056   | 57  | NUTM2B-AS1 |
| chr5:41749526-41807438    | 27  | OXCT1      |
| chr20:3907925-3918796     | 19  | PANK2      |
| chr12:53461014-53471807   | 4   | PCBP2      |
| chr3:167695595-167725473  | 8   | PDCD10     |
| chrX:134413490-134425330  | 3   | PHF6       |
| chr3:142664201-142678113  | 38  | PLS1       |
| chr14:49663314-49666413   | 16  | POLE2      |
| chr22:46176752-46198591   | 36  | PPARA      |
| chr14:103778744-103797518 | 865 | PPP1R13B   |
| chr14:73147794-73148106   | 67  | PSEN1      |
| chr12:112472943-112482205 | 10  | PTPN11     |
| chr18:12825809-12836891   | 10  | PTPN2      |
| chr2:119877322-119915242  | 15  | PTPN4      |
| chr20:2964271-2965202     | 357 | PTPRA      |
| chr2:20318536-20333063    | 21  | PUM2       |
| chr9:136223762-136226874  | 112 | QSOX2      |
| chr11:66271796-66272460   | 7   | RAB1B      |
| chr1:220189702-220191284  | 3   | RAB3GAP2   |
| chr12:15217428-15348437   | 15  | REG        |
| chr1:176135009-176184692  | 8   | RFWD2      |
| chr9:3330258-3395596      | 18  | RFX3       |
| chr11:71982760-71990717   | 81  | RNF121     |
| chr6:88769773-88904955    | 15  | RNGTT      |
| chr17:59935192-59940943   | 45  | RPS6KB1    |
| chr3:158122102-158146771  | 4   | RSRC1      |
| chr10:12160929-12162289   | 11  | SEC61A2    |
| chr3:185619298-185624082  | 6   | SENP2      |

|                          |     |          |
|--------------------------|-----|----------|
| chr13:29532823-29536202  | 40  | SLC7A1   |
| chr3:47710682-47772936   | 13  | SMARCC1  |
| chr16:69235747-69245815  | 11  | SNTB2    |
| chr7:17814833-17850964   | 15  | SNX13    |
| chr1:179335505-179341310 | 34  | SOAT1    |
| chr1:109336239-109342158 | 4   | SORT1    |
| chr8:100220278-100233537 | 87  | SPAG1    |
| chr17:50970706-50987237  | 26  | SPAG9    |
| chr9:92067965-92080963   | 17  | SPTLC1   |
| chr2:152132113-152150229 | 9   | STAM2    |
| chr10:94441895-94458595  | 6   | TBC1D12  |
| chr22:47034455-47037198  | 11  | TBC1D22A |
| chr8:93772588-93782460   | 11  | TMEM67   |
| chr6:30196515-30204765   | 4   | TRIM26   |
| chr17:59051213-59057054  | 55  | TRIM37   |
| chr1:247860616-247868063 | 163 | TRIM58   |
| chr5:14286870-14304592   | 43  | TRIO     |
| chr15:43398040-43401850  | 6   | TUBGCP4  |
| chr5:134388324-134390363 | 9   | UBE2B    |
| chr2:128164729-128171284 | 164 | UGGT1    |
| chr1:162503753-162512823 | 9   | UHMK1    |
| chr7:7786787-7801743     | 49  | UMAD1    |
| chr9:35228014-35243364   | 170 | UNC13B   |
| chr16:21961327-21976243  | 14  | UQCRC2   |
| chr1:7773441-7778169     | 9   | VAMP3    |
| chr8:99096311-99111279   | 20  | VPS13B   |
| chr14:55000502-55002185  | 4   | WDHD1    |
| chr9:134139819-134142719 | 11  | WDR5     |
| chr12:1631297-1646297    | 24  | WNT5B    |
| chr8:31096767-31100955   | 9   | WRN      |
| chr6:43565659-43567354   | 51  | XPO5     |
| chr5:83104909-83204921   | 21  | XRCC4    |
| chr10:27119293-27126786  | 7   | YME1L1   |
| chr1:32633644-32634792   | 134 | ZBTB8OS  |
| chr6:38061592-38061775   | 25  | ZFAND3   |
| chr16:88485938-88489153  | 10  | ZFPM1    |
| chr7:149128822-149129542 | 5   | ZNF398   |
| chr2:71396140-71400180   | 19  | ZNF638   |
| chr12:50999173-51010766  | 18  | SLC11A2  |
| chr22:45689711-45693078  | 5   | ATXN10   |
| chrX:68511848-68513405   | 9   | YIPF6    |
| chr2:120127687-120175000 | 59  | EPB41L5  |
| chr19:7440343-7447168    | 12  | ARHGEF18 |

|                           |     |          |
|---------------------------|-----|----------|
| chr2:232136471-232163632  | 10  | DIS3L2   |
| chr4:25847293-25847864    | 9   | SEL1L3   |
| chr10:11747348-11755608   | 171 | ECHDC3   |
| chr12:100594874-100612141 | 6   | GAS2L3   |
| chr16:74300114-74302292   | 97  | PSMD7    |
| chr3:141501948-141540609  | 11  | RASA2    |
| chr5:121974195-121994670  | 18  | SRFBP1   |
| chr1:43920403-43920928    | 80  | ST3GAL3  |
| chr17:40395448-40396465   | 30  | TOP2A    |
| chr2:128113083-128145967  | 8   | UGGT1    |
| chr4:1892165-1939778      | 28  | WHSC1    |
| chr6:43560177-43573601    | 30  | XPO5     |
| chr8:78675786-78698513    | 16  | ZC2HC1A  |
| chr5:112821895-112828006  | 3   | APC      |
| chr17:73235475-73236995   | 13  | C17orf80 |
| chr4:168998201-169007756  | 4   | CBR4     |
| chr16:75391379-75395209   | 15  | CFDP1    |
| chr20:50935029-50955285   | 4   | DPM1     |
| chr6:5404541-5445504      | 10  | FARS2    |
| chr2:169555123-169563350  | 23  | FASTKD1  |
| chr17:44424348-44464544   | 6   | GPATCH8  |
| chr12:350620-366104       | 36  | KDM5A    |
| chr3:185437446-185437630  | 10  | MAP3K13  |
| chr18:54187713-54205157   | 20  | MBD2     |
| chr14:103390239-103390731 | 19  | nogene   |
| chr1:15691314-15691854    | 10  | nogene   |
| chr4:94640275-94657547    | 4   | PDLIM5   |
| chr19:7542560-7551437     | 6   | PNPLA6   |
| chr7:155672866-155707068  | 4   | RBM33    |
| chr7:5729431-5741815      | 11  | RNF216   |
| chr11:9807999-9809002     | 31  | SBF2     |
| chr5:69100806-69114496    | 6   | SLC30A5  |
| chr5:122801868-122803613  | 4   | SNX2     |
| chr3:113493205-113506605  | 11  | SPICE1   |
| chr1:47301560-47310362    | 15  | STIL     |
| chr20:7996025-8010315     | 31  | TMX4     |
| chr18:31832083-31839457   | 24  | TRAPPC8  |
| chr9:33944364-33956146    | 89  | UBAP2    |
| chr13:29767098-29777263   | 246 | UBL3     |
| chr12:95294271-95296258   | 31  | VEZT     |
| chr2:71363152-71380565    | 12  | ZNF638   |
| chr5:32397218-32404097    | 11  | ZFR      |
| chr1:179126376-179131481  | 9   | ABL2     |

|                           |     |          |
|---------------------------|-----|----------|
| chr20:45848449-45855292   | 7   | ACOT8    |
| chr1:212997154-213013418  | 3   | ANGEL2   |
| chr5:71522288-71532427    | 7   | BDP1     |
| chr16:50354424-50361932   | 11  | BRD7     |
| chr3:143985542-144048812  | 13  | C3orf58  |
| chr9:114624349-114628250  | 13  | C9orf91  |
| chr22:46707842-46721015   | 11  | CERK     |
| chr1:155725381-155726019  | 52  | DAP3     |
| chr12:31447537-31452476   | 11  | DENND5B  |
| chr1:50490587-50596216    | 17  | FAF1     |
| chr11:20364236-20383258   | 16  | HTATIP2  |
| chr5:146144266-146144709  | 3   | LARS     |
| chr10:71828980-71831247   | 6   | nogene   |
| chr15:67604824-67605108   | 13  | nogene   |
| chr7:104161071-104168525  | 49  | ORC5     |
| chr4:2156787-2179465      | 17  | POLN     |
| chr4:25333182-25333988    | 159 | ZCCHC4   |
| chr11:9471301-9479546     | 3   | ZNF143   |
| chr21:45486860-45488444   | 6   | COL18A1  |
| chr16:11123741-11123946   | 12  | CLEC16A  |
| chr17:82183773-82193830   | 8   | CCDC57   |
| chr17:47143882-47172064   | 6   | CDC27    |
| chr3:33683265-33696933    | 5   | CLASP2   |
| chr8:119838258-119847080  | 53  | DSCC1    |
| chr5:41927012-41929917    | 64  | FBXO4    |
| chr14:50475076-50486194   | 85  | MAP4K5   |
| chr2:134317528-134362408  | 5   | MGAT5    |
| chr13:98504914-98519473   | 41  | STK24    |
| chr6:158573419-158585425  | 6   | TMEM181  |
| chr6:37929958-38061775    | 4   | ZFAND3   |
| chr6:100766564-100805880  | 19  | ASCC3    |
| chr10:102033025-102040125 | 7   | C10orf76 |
| chr1:44284834-44319744    | 99  | ERI3     |
| chr1:160279800-160283639  | 12  | PEX19    |
| chr1:10256246-10268263    | 8   | KIF1B    |
| chr6:32118955-32120902    | 11  | ATF6B    |
| chr1:70296129-70306290    | 48  | ANKRD13C |
| chr15:89871474-89889140   | 191 | AP3S2    |
| chr17:8206490-8207840     | 91  | AURKB    |
| chr14:80862756-80906081   | 71  | CEP128   |
| chr12:108701123-108717762 | 11  | CORO1C   |
| chr1:161123838-161124526  | 12  | DEDD     |
| chr18:49281996-49379758   | 17  | DYM      |

|                           |     |         |
|---------------------------|-----|---------|
| chr11:103303092-103316620 | 109 | DYNC2H1 |
| chr6:52423686-52465115    | 5   | EFHC1   |
| chr2:24060813-24063782    | 8   | FKBP1B  |
| chr8:43059091-43085396    | 23  | FNTA    |
| chr20:25418104-25441776   | 47  | GINS1   |
| chr3:129458598-129469417  | 11  | IFT122  |
| chr7:2014501-2069338      | 16  | MAD1L1  |
| chr14:47061248-47097123   | 11  | MDGA2   |
| chrX:40713777-40715220    | 18  | MED14   |
| chr19:42335930-42351761   | 4   | MEGF8   |
| chr18:36203112-36220217   | 4   | MOCOS   |
| chr2:42682400-42697834    | 19  | MTA3    |
| chr17:31155982-31219118   | 11  | NF1     |
| chr1:5961793-5986232      | 12  | NPHP4   |
| chr17:75208526-75215823   | 11  | NUP85   |
| chr1:224231225-224268133  | 16  | NVL     |
| chr10:73454411-73479517   | 13  | PPP3CB  |
| chr9:123070349-123076762  | 10  | RABGAP1 |
| chr5:131548046-131592466  | 26  | RAPGEF6 |
| chr19:38130497-38142710   | 19  | SIPA1L3 |
| chr5:134157706-134161130  | 8   | SKP1    |
| chr6:44227262-44232428    | 5   | SLC29A1 |
| chr18:51054780-51059916   | 13  | SMAD4   |
| chr4:185339378-185342116  | 18  | SNX25   |
| chr17:38361710-38377842   | 144 | SOCS7   |
| chr3:136398748-136422613  | 3   | STAG1   |
| chr15:50609580-50611321   | 5   | TRPM7   |
| chr5:61472680-61473037    | 147 | ZSWIM6  |
| chr11:83198478-83211430   | 11  | ANKRD42 |
| chr3:48979481-48980496    | 319 | ARIH2   |
| chr2:218228737-218239484  | 4   | ARPC2   |
| chr3:11298685-11313420    | 4   | ATG7    |
| chr2:214752446-214797117  | 55  | BARD1   |
| chr7:33383665-33388144    | 6   | BBS9    |
| chr8:85281229-85281639    | 10  | CA13    |
| chr5:180573987-180576684  | 18  | CNOT6   |
| chr15:44490783-44496458   | 11  | CTDSPL2 |
| chr16:20860047-20862643   | 9   | DCUN1D3 |
| chr2:25274940-25276166    | 5   | DNMT3A  |
| chr1:28035543-28048426    | 112 | EYA3    |
| chr3:138619710-138629156  | 9   | FAIM    |
| chr14:65455620-65464473   | 16  | FUT8    |
| chr5:151799888-151800869  | 18  | G3BP1   |

|                           |     |           |
|---------------------------|-----|-----------|
| chr5:52861446-52865817    | 9   | ITGA1     |
| chr1:35470862-35474906    | 5   | KIAA0319L |
| chr4:165219933-165238899  | 228 | KLHL2     |
| chr20:32833716-32836841   | 7   | MAPRE1    |
| chr1:46562648-46572167    | 10  | MKNK1     |
| chr11:47638698-47639051   | 26  | MTCH2     |
| chrX:64331556-64337393    | 7   | MTMR8     |
| chr12:56155418-56159730   | 126 | MYL6B     |
| chr19:37001330-37001683   | 7   | nogene    |
| chr2:236264772-236268343  | 12  | nogene    |
| chr14:96931330-96945382   | 5   | nogene    |
| chr3:52637868-52638468    | 10  | nogene    |
| chr11:6497449-6498939     | 5   | nogene    |
| chr10:27151187-27151637   | 10  | nogene    |
| chr17:81610209-81622278   | 12  | NPLOC4    |
| chr19:46383878-46384794   | 3   | PPP5C     |
| chr8:140702569-140706205  | 16  | PTK2      |
| chr6:43024984-43029190    | 9   | RRP36     |
| chr5:172350362-172373815  | 12  | SH3PXD2B  |
| chr1:9553625-9567361      | 4   | SLC25A33  |
| chr3:155829687-155834041  | 26  | SLC33A1   |
| chr9:96320997-96322080    | 29  | SLC35D2   |
| chr19:43747441-43750747   | 10  | SMG9      |
| chr15:44633504-44657263   | 3   | SPG11     |
| chr2:85861180-85870258    | 10  | ST3GAL5   |
| chr17:64188167-64195095   | 3   | TEX2      |
| chr3:196075158-196077122  | 26  | TFRC      |
| chr13:100642210-100670569 | 10  | TMTC4     |
| chr17:18292644-18306966   | 21  | TOP3A     |
| chr6:158282262-158314268  | 16  | TULP4     |
| chr7:67067284-67098718    | 42  | TYW1      |
| chr3:41681507-41705305    | 10  | ULK4      |
| chr2:218457091-218463366  | 3   | USP37     |
| chr12:121934044-121934356 | 19  | WDR66     |
| chr6:43567168-43573601    | 3   | XPO5      |
| chr19:57988206-57999896   | 8   | ZNF606    |
| chr19:36094030-36099617   | 10  | WDR62     |
| chrX:107029126-107030315  | 12  | nogene    |
| chr8:89587890-89596481    | 5   | nogene    |
| chr11:85996825-86001158   | 35  | PICALM    |
| chr1:8495062-8541318      | 52  | RERE      |
| chr10:31852516-31861658   | 11  | ARHGAP12  |
| chr8:38114191-38116725    | 4   | ASH2L     |



|                          |     |          |
|--------------------------|-----|----------|
| chr17:67959540-67975958  | 4   | BPTF     |
| chr22:28710005-28734727  | 32  | CHEK2    |
| chr12:92826165-92853025  | 10  | EEA1     |
| chr20:34089515-34090602  | 33  | EIF2S2   |
| chr3:33358966-33364719   | 20  | FBXL2    |
| chr4:53414633-53428183   | 8   | FIP1L1   |
| chr15:90486953-90487582  | 3   | IQGAP1   |
| chr10:32908367-32935558  | 25  | ITGB1    |
| chr2:30525586-30568176   | 24  | LCLAT1   |
| chr22:40552105-40586112  | 10  | MKL1     |
| chr15:65023671-65027040  | 12  | MTFMT    |
| chr11:9261128-9261546    | 6   | nogene   |
| chr9:111591219-111591479 | 17  | nogene   |
| chr6:126112865-126130858 | 8   | nogene   |
| chr22:31648100-31650778  | 7   | nogene   |
| chr1:233135012-233208689 | 53  | PCNXL2   |
| chr20:18142207-18142919  | 36  | PET117   |
| chr20:35842572-35847434  | 41  | PHF20    |
| chr20:34585436-34616139  | 3   | PIGU     |
| chr3:121529644-121544906 | 6   | POLQ     |
| chr11:68544837-68558679  | 3   | PPP6R3   |
| chr1:31055312-31059577   | 39  | PUM1     |
| chr3:128806371-128813471 | 29  | RAB7A    |
| chr5:223481-226047       | 9   | SDHA     |
| chr7:2275111-2278305     | 40  | SNX8     |
| chr17:50984922-50989872  | 4   | SPAG9    |
| chr17:20017986-20110562  | 30  | SPECC1   |
| chr8:123077110-123101007 | 93  | TBC1D31  |
| chr3:119500694-119504021 | 178 | TIMMDC1  |
| chrX:118387339-118398470 | 12  | WDR44    |
| chr1:26760855-26763285   | 51  | ARID1A   |
| chr7:6421726-6430607     | 8   | DAGLB    |
| chr22:35292991-35293743  | 25  | HMGXB4   |
| chr10:68175322-68195532  | 55  | MYPN     |
| chr7:78828294-78902612   | 11  | nogene   |
| chr1:233217898-233252788 | 5   | PCNXL2   |
| chr6:3737078-3738148     | 11  | PXDC1    |
| chr3:108057476-108071182 | 5   | CD47     |
| chr2:233434379-233441995 | 8   | DGKD     |
| chr10:5768212-5773941    | 24  | GDI2     |
| chr1:94203929-94231643   | 5   | ARHGAP29 |
| chr3:27256295-27284961   | 9   | NEK10    |
| chr7:26684735-26727006   | 30  | SKAP2    |

|                           |     |             |
|---------------------------|-----|-------------|
| chr3:121772556-121781874  | 4   | IQCB1       |
| chr16:81312727-81313120   | 6   | nogene      |
| chr3:72841044-72842402    | 26  | SHQ1        |
| chr2:97833364-97844261    | 12  | TMEM131     |
| chr2:170073427-170080684  | 4   | UBR3        |
| chr12:95105006-95141539   | 13  | FGD6        |
| chr18:46122466-46124893   | 17  | HAUS1       |
| chr2:111344060-111367575  | 9   | MIR4435-2HG |
| chr2:61492034-61495613    | 19  | XPO1        |
| chr20:35800093-35812719   | 6   | nogene      |
| chr1:90005132-90007750    | 23  | ZNF326      |
| chr3:195333027-195345317  | 4   | ACAP2       |
| chr12:32710928-32722633   | 17  | DNM1L       |
| chr1:23053760-23059167    | 5   | KDM1A       |
| chr17:39466521-39467073   | 10  | nogene      |
| chr3:45703437-45709647    | 18  | SACM1L      |
| chr5:172211966-172234358  | 16  | UBTD2       |
| chr1:150966161-150969091  | 15  | CERS2       |
| chrX:152846281-152858916  | 17  | NSDHL       |
| chr4:184685408-184685684  | 11  | PRIMPOL     |
| chr6:129638393-129642018  | 14  | ARHGAP18    |
| chr7:101916114-102195603  | 8   | CUX1        |
| chr12:132120419-132121980 | 24  | EP400NL     |
| chr9:21859302-21862135    | 11  | MTAP        |
| chr5:37333462-37341242    | 8   | NUP155      |
| chr2:10791794-10793202    | 129 | PDIA6       |
| chr8:132777795-132798860  | 14  | PHF20L1     |
| chr1:186893010-186894211  | 4   | PLA2G4A     |
| chr3:100368043-100375152  | 6   | TOMM70A     |
| chr2:63313247-63382094    | 28  | WDPCP       |
| chr16:68093355-68126610   | 16  | NFATC3      |
| chr1:120741807-120763709  | 97  | nogene      |
| chr11:108299713-108304852 | 45  | ATM         |
| chr9:85669484-85692813    | 93  | AGTPBP1     |
| chr6:89595915-89606105    | 5   | ANKRD6      |
| chr8:61633682-61653660    | 91  | ASPH        |
| chr6:80167677-80203212    | 9   | BCKDHB      |
| chr15:59116689-59117368   | 9   | CCNB2       |
| chr11:47482694-47483532   | 21  | CELF1       |
| chr20:35458303-35462553   | 5   | CEP250      |
| chr1:111147641-111174963  | 27  | CEPT1       |
| chr7:107324439-107372760  | 5   | COG5        |
| chr11:88300529-88312554   | 10  | CTSC        |

|                           |     |         |
|---------------------------|-----|---------|
| chr11:107329917-107353736 | 18  | CWF19L2 |
| chr7:87884978-87897339    | 11  | DBF4    |
| chr15:65454262-65456371   | 10  | DPP8    |
| chr6:131882344-131886724  | 4   | ENPP1   |
| chr19:41391732-41392980   | 15  | EXOSC5  |
| chr20:58895611-58905480   | 33  | GNAS    |
| chr10:13191298-13192568   | 147 | MCM10   |
| chr22:36316516-36318325   | 6   | MYH9    |
| chr12:77994802-78021862   | 5   | NAV3    |
| chr19:5710355-5710782     | 31  | nogene  |
| chr10:31355146-31387266   | 15  | nogene  |
| chr9:110784812-110785728  | 18  | nogene  |
| chr8:125102013-125182256  | 8   | NSMCE2  |
| chr2:219565241-219568324  | 4   | OBSL1   |
| chr8:89909566-89921171    | 10  | OSGIN2  |
| chr3:136260478-136317064  | 21  | PCCB    |
| chr15:64156161-64156724   | 16  | PPIB    |
| chr19:45138513-45142458   | 9   | PPP1R37 |
| chr11:82849048-82853278   | 11  | PRCP    |
| chr10:98231511-98236164   | 5   | R3HCC1L |
| chr5:87331347-87341321    | 25  | RASA1   |
| chr3:149846010-149921227  | 348 | RNF13   |
| chr9:105335562-105358433  | 9   | SLC44A1 |
| chr13:29532823-29553860   | 115 | SLC7A1  |
| chr16:68273794-68275249   | 13  | SLC7A6  |
| chr16:67255020-67258447   | 5   | SLC9A5  |
| chr3:47662333-47678311    | 4   | SMARCC1 |
| chr1:47295764-47304996    | 24  | STIL    |
| chr11:64199939-64200293   | 11  | STIP1   |
| chr6:85618817-85619417    | 102 | SYNCRIP |
| chrX:71423116-71424238    | 32  | TAF1    |
| chr17:63193990-63200957   | 53  | TANC2   |
| chr15:101701085-101703937 | 7   | TARSL2  |
| chr7:143875988-143876622  | 18  | TCAF1   |
| chr2:171011372-171028405  | 13  | TLK1    |
| chr4:55403235-55411839    | 14  | TMEM165 |
| chr7:98967040-98967698    | 21  | TRRAP   |
| chr10:114951093-114974385 | 14  | TRUB1   |
| chr7:67055834-67067403    | 52  | TYW1    |
| chr7:157201720-157225539  | 23  | UBE3C   |
| chr7:139237004-139259370  | 11  | UBN2    |
| chr11:113840597-113841768 | 5   | USP28   |
| chr7:93303459-93334197    | 18  | VPS50   |

|                           |     |             |
|---------------------------|-----|-------------|
| chr13:26612960-26642403   | 28  | WASF3       |
| chr17:27303366-27309272   | 28  | WSB1        |
| chr4:183173557-183193708  | 5   | WWC2        |
| chr17:83002672-83048785   | 5   | B3GNTL1     |
| chr11:68567013-68576043   | 74  | PPP6R3      |
| chr9:109080838-109108570  | 101 | TMEM245     |
| chr10:27134830-27136385   | 27  | YME1L1      |
| chr1:198262574-198293039  | 4   | NEK7        |
| chr1:8495062-8614686      | 52  | RERE        |
| chr10:13322834-13345028   | 9   | SEPHS1      |
| chr2:61331275-61350693    | 4   | USP34       |
| chr3:196321303-196322714  | 8   | nogene      |
| chr10:87925512-87952259   | 58  | PTEN        |
| chr12:50461134-50467120   | 19  | LARP4       |
| chr11:122794701-122799034 | 3   | UBASH3B     |
| chr10:31839636-31854206   | 8   | ARHGAP12    |
| chr7:56054368-56056414    | 12  | CCT6A       |
| chr6:82223439-82231842    | 32  | IBTK        |
| chr7:5982823-5992057      | 12  | PMS2        |
| chr6:43497880-43503508    | 18  | TJAP1       |
| chr10:101797979-101810314 | 3   | MGEA5       |
| chr17:35624396-35650789   | 7   | AP2B1       |
| chr19:47746966-47752607   | 5   | GLTSCR2     |
| chr5:135388921-135393187  | 5   | H2AFY       |
| chr7:74255596-74255853    | 8   | nogene      |
| chr20:38488402-38509208   | 4   | RALGAPB     |
| chr21:42859661-42863596   | 39  | WDR4        |
| chr10:68906710-68919981   | 18  | DDX50       |
| chr2:15473221-15478289    | 5   | NBAS        |
| chr9:93439402-93441373    | 11  | nogene      |
| chr20:62256056-62264718   | 4   | OSBPL2      |
| chr8:47897160-47930012    | 11  | PRKDC       |
| chr14:68291883-68411527   | 4   | RAD51B      |
| chr17:7574545-7577694     | 11  | SEN3-EIF4A1 |
| chr3:57841298-57864716    | 9   | SLMAP       |
| chr7:127807483-127904819  | 58  | SND1        |
| chr1:1564486-1564916      | 13  | SSU72       |
| chr3:12496517-12503784    | 30  | TSEN2       |
| chr3:51310231-51315128    | 6   | DOCK3       |
| chr12:50430494-50441643   | 71  | LARP4       |
| chr5:151927173-151947795  | 9   | nogene      |
| chr8:72052538-72076627    | 59  | MSC-AS1     |
| chr9:33351559-33354892    | 50  | NFX1        |

|                           |     |          |
|---------------------------|-----|----------|
| chr1:100912111-100921841  | 5   | SLC30A7  |
| chr4:152411302-152411872  | 15  | FBXW7    |
| chr12:111888487-111893585 | 4   | MAPKAPK5 |
| chr17:18911102-18928957   | 26  | PRPSAP2  |
| chr17:783082-783327       | 6   | RNMTL1   |
| chr19:19024618-19031082   | 33  | SUGP2    |
| chr17:82884144-82903478   | 156 | TBCD     |
| chr1:32161946-32167296    | 17  | KPNA6    |
| chr3:9424466-9435906      | 21  | SETD5    |
| chr20:32145090-32146855   | 12  | TM9SF4   |
| chr11:78112649-78121174   | 45  | ALG8     |
| chr12:32216246-32306122   | 6   | BICD1    |
| chr15:41243666-41270618   | 14  | CHP1     |
| chr4:77756861-77776392    | 12  | CNOT6L   |
| chr7:134148237-134183853  | 4   | LRGUK    |
| chr11:73825707-73844976   | 30  | MRPL48   |
| chr9:126340507-126392195  | 9   | MVB12B   |
| chr22:25509182-25510862   | 7   | nogene   |
| chr3:38190730-38198863    | 10  | OXSR1    |
| chr3:196801926-196803164  | 57  | PAK2     |
| chr17:66468590-66496283   | 8   | PRKCA    |
| chr2:238347454-238356080  | 17  | TRAF3IP1 |
| chr6:41871563-41916939    | 36  | USP49    |
| chr18:56731382-56758953   | 47  | WDR7     |
| chr9:37126311-37327834    | 35  | ZCCHC7   |
| chr3:171188701-171194635  | 90  | TNIK     |
| chr18:13029662-13042334   | 12  | CEP192   |
| chr7:55978125-55981567    | 9   | GBAS     |
| chr16:69669976-69684970   | 17  | NFAT5    |
| chr6:52452687-52454287    | 6   | EFHC1    |
| chr6:31892406-31892910    | 136 | EHMT2    |
| chr6:149578821-149582603  | 8   | GINM1    |
| chr15:50465046-50477499   | 6   | USP8     |
| chr13:32535768-32537027   | 64  | N4BP2L2  |
| chrX:19929784-19935898    | 8   | CXorf23  |
| chr19:19655527-19656183   | 5   | ATP13A1  |
| chr17:30266884-30286902   | 15  | BLMH     |
| chr20:49058452-49066510   | 9   | CSE1L    |
| chr5:135360496-135370142  | 27  | H2AFY    |
| chr3:23954536-23959815    | 18  | NR1D2    |
| chr15:68141945-68164804   | 85  | PIAS1    |
| chrX:338603-362332        | 13  | PPP2R3B  |
| chr1:151024610-151028944  | 5   | PRUNE    |

|                           |     |                 |
|---------------------------|-----|-----------------|
| chr5:176289653-176296320  | 17  | SIMC1           |
| chr3:67518246-67529186    | 19  | SUCLG2          |
| chr2:112064161-112067067  | 11  | TMEM87B         |
| chr10:84371013-84425893   | 4   | CCSER2          |
| chrX:52955153-52956755    | 17  | FAM156A         |
| chr10:5726884-5731203     | 13  | FAM208B         |
| chr1:16294782-16316571    | 25  | FBXO42          |
| chr15:48717017-48729540   | 9   | nogene          |
| chr10:111017221-111053120 | 12  | nogene          |
| chr6:3076763-3085408      | 72  | RIPK1           |
| chr14:35107303-35110629   | 19  | PPP2R3C         |
| chr2:31891991-31943383    | 10  | MEMO1           |
| chr20:25020009-25030958   | 5   | ACSS1           |
| chr5:140506834-140513479  | 9   | ANKHD1-EIF4EBP3 |
| chr10:72715110-72736571   | 7   | MCU             |
| chrX:18948743-18954412    | 10  | PHKA2           |
| chr9:122877470-122883379  | 43  | RC3H2           |
| chr16:88027482-88065332   | 7   | BANP            |
| chr4:77742140-77776392    | 27  | CNOT6L          |
| chr1:108943474-108944057  | 16  | CLCC1           |
| chr2:239134244-239163923  | 9   | HDAC4           |
| chr16:2566355-2586893     | 9   | PDPK1           |
| chr9:134139819-134140811  | 55  | WDR5            |
| chr15:51463378-51464876   | 15  | DMXL2           |
| chr6:31742876-31744581    | 16  | MSH5            |
| chr4:23120319-23186098    | 12  | nogene          |
| chr7:17821508-17875790    | 13  | SNX13           |
| chr10:1105125-1125024     | 5   | WDR37           |
| chr19:10151397-10162748   | 4   | DNMT1           |
| chr14:69203916-69209803   | 12  | EXD2            |
| chr7:102822039-102884312  | 12  | FBXL13          |
| chr3:145983607-146034688  | 9   | nogene          |
| chr16:625431-626121       | 12  | RAB40C          |
| chr17:80891719-80893865   | 117 | RPTOR           |
| chr11:47161190-47161436   | 16  | C11orf49        |
| chr2:29121373-29133816    | 11  | CLIP4           |
| chr19:12954139-12954526   | 61  | GADD45GIP1      |
| chr2:85542564-85543034    | 29  | MAT2A           |
| chr8:37877108-37877551    | 53  | RAB11FIP1       |
| chr12:122261260-122264199 | 16  | VPS33A          |
| chr14:73024025-73024942   | 9   | ZFYVE1          |
| chr1:28459084-28466535    | 25  | PHACTR4         |
| chr11:61437624-61446113   | 21  | SDHAF2          |

|                           |     |          |
|---------------------------|-----|----------|
| chr5:134703758-134718173  | 11  | SEC24A   |
| chr3:197149742-197194589  | 52  | DLG1     |
| chr2:27677294-27682359    | 25  | SLC4A1AP |
| chr20:52088391-52098587   | 73  | ZFP64    |
| chr16:16007815-16014628   | 7   | ABCC1    |
| chr10:115120184-115165645 | 46  | ATRNL1   |
| chr15:72544819-72555907   | 24  | ARIH1    |
| chr15:89113724-89116521   | 299 | ABHD2    |
| chr16:71746587-71750332   | 9   | AP1G1    |
| chr20:33395012-33397084   | 17  | CDK5RAP1 |
| chr20:5175182-5178956     | 10  | CDS2     |
| chr16:53231418-53243016   | 16  | CHD9     |
| chr5:138824529-138827718  | 71  | CTNNA1   |
| chr11:107348936-107418287 | 10  | CWF19L2  |
| chr15:65756139-65756472   | 4   | DENND4A  |
| chr6:158637127-158641360  | 7   | DYNLT1   |
| chr17:7850071-7851394     | 13  | KDM6B    |
| chr2:37236095-37248426    | 12  | NDUFAF7  |
| chr9:33624555-33624763    | 9   | nogene   |
| chr1:155675616-155675970  | 20  | nogene   |
| chr13:28664508-28672432   | 10  | POMP     |
| chrX:18246576-18247882    | 14  | SCML2    |
| chr3:27403138-27452498    | 10  | SLC4A7   |
| chr17:50990449-50998617   | 6   | SPAG9    |
| chr2:161367477-161395203  | 123 | PSMD14   |
| chr16:14644273-14655210   | 11  | BFAR     |
| chr19:49614532-49616219   | 32  | PRR12    |
| chr3:72792915-72824551    | 8   | SHQ1     |
| chr12:120716627-120717042 | 16  | UNC119B  |
| chr13:31229184-31261082   | 16  | B3GLCT   |
| chr12:1371832-1408247     | 14  | ERC1     |
| chr17:39264174-39265453   | 16  | FBXL20   |
| chr20:31527483-31528050   | 50  | HM13     |
| chr8:54044816-54052756    | 4   | LYPLA1   |
| chr5:151458787-151479489  | 51  | SLC36A1  |
| chr9:33996222-34017189    | 121 | UBAP2    |
| chr8:99013759-99038566    | 10  | VPS13B   |
| chr2:32510525-32513154    | 37  | BIRC6    |
| chr15:69255793-69261329   | 9   | GLCE     |
| chr3:161224929-161235212  | 45  | NMD3     |
| chrX:17477145-17482724    | 12  | nogene   |
| chr11:65503116-65504595   | 20  | nogene   |
| chrX:45844850-45845520    | 10  | nogene   |

|                           |     |                 |
|---------------------------|-----|-----------------|
| chr19:16640919-16641651   | 13  | nogene          |
| chr3:12312379-12381491    | 8   | PPARG           |
| chr8:127939507-127989291  | 10  | PVT1            |
| chr12:106851449-106860412 | 27  | RIC8B           |
| chr11:60919685-60920988   | 46  | TMEM109         |
| chr16:2317282-2317764     | 24  | ABCA3           |
| chr22:31447425-31449531   | 9   | EIF4ENIF1       |
| chr6:73003907-73042062    | 4   | KCNQ5           |
| chr12:131725404-131728428 | 16  | SFSWAP          |
| chr7:105073618-105077433  | 72  | KMT2E           |
| chr18:9211583-9221999     | 4   | ANKRD12         |
| chr10:32919884-32930044   | 4   | ITGB1           |
| chr17:27303366-27310174   | 7   | WSB1            |
| chr11:66639699-66640123   | 330 | RBM4            |
| chr8:139730657-139732202  | 9   | TRAPPC9         |
| chr13:100330560-100368574 | 12  | PCCA            |
| chr6:130312977-130334845  | 7   | SAMD3           |
| chr5:140440118-140445975  | 174 | ANKHD1-EIF4EBP3 |
| chr4:51860542-51877854    | 32  | DCUN1D4         |
| chr10:119065398-119073937 | 17  | EIF3A           |
| chr7:152309965-152315338  | 564 | KMT2C           |
| chr7:105073618-105078963  | 16  | KMT2E           |
| chr1:171783739-171790616  | 7   | METTL13         |
| chr4:145150512-145171720  | 12  | OTUD4           |
| chr1:213077695-213117410  | 145 | RPS6KC1         |
| chr8:100220278-100225339  | 8   | SPAG1           |
| chr13:19993062-19993919   | 20  | ZMYM2           |
| chr6:116645713-116658924  | 6   | ZUFSP           |
| chr8:131940498-131955905  | 18  | EFR3A           |
| chr4:2657802-2663288      | 19  | FAM193A         |
| chr3:172247532-172285984  | 18  | FNDC3B          |
| chr3:155914418-155916192  | 8   | GMPS            |
| chr10:119930328-119933787 | 8   | SEC23IP         |
| chr6:145864387-145894977  | 15  | SHPRH           |
| chr3:136464880-136502779  | 33  | STAG1           |
| chr1:185174371-185175113  | 4   | SWT1            |
| chr6:158081108-158081510  | 11  | SYNJ2           |
| chr15:91000489-91003131   | 10  | VPS33B          |
| chr20:49279103-49280964   | 17  | ZFAS1           |
| chr8:140793353-140803650  | 4   | PTK2            |
| chr4:56378147-56384341    | 10  | AASDH           |
| chr3:15707923-15737233    | 7   | ANKRD28         |
| chr17:35657598-35682824   | 8   | AP2B1           |



|                           |    |           |
|---------------------------|----|-----------|
| chr8:102838743-102839823  | 11 | AZIN1     |
| chr12:32216246-32216459   | 8  | BICD1     |
| chr17:44154555-44157941   | 13 | C17orf53  |
| chr5:138319218-138326054  | 16 | CDC25C    |
| chr1:243169627-243225321  | 3  | CEP170    |
| chr12:31479588-31495919   | 7  | DENND5B   |
| chr5:55267137-55272175    | 25 | DHX29     |
| chr13:98920953-98923371   | 3  | DOCK9     |
| chr10:132196860-132197101 | 24 | DPYSL4    |
| chr6:56670640-56843238    | 8  | DST       |
| chr1:20879322-20904971    | 8  | EIF4G3    |
| chr6:79924951-79926381    | 9  | ELOVL4    |
| chr18:45948502-45952643   | 39 | EPG5      |
| chr1:44339044-44339322    | 16 | ER13      |
| chr1:50535368-50567231    | 11 | FAF1      |
| chr7:22964414-22991139    | 68 | FAM126A   |
| chr19:38948566-38950336   | 10 | FBXO17    |
| chr4:893376-904779        | 5  | GAK       |
| chr1:1815755-1853297      | 10 | GNB1      |
| chr18:46122466-46123364   | 14 | HAUS1     |
| chr2:38577460-38591648    | 17 | HNRNPLL   |
| chr1:153759525-153765063  | 17 | INTS3     |
| chr8:94827262-94829026    | 13 | INTS8     |
| chr13:30208576-30210442   | 9  | KATNAL1   |
| chr1:183108275-183110654  | 4  | LAMC1     |
| chr10:829384-845055       | 4  | LARP4B    |
| chr10:884446-885760       | 43 | LARP4B    |
| chr7:128642216-128648982  | 31 | LINC01000 |
| chr8:55950458-55969793    | 36 | LYN       |
| chr5:139318907-139319501  | 15 | MATR3     |
| chr10:101798841-101810314 | 5  | MGEA5     |
| chr21:36338767-36344707   | 7  | MORC3     |
| chr12:65308528-65369026   | 24 | MSRB3     |
| chr9:21859302-21864433    | 9  | MTAP      |
| chr8:120459214-120470937  | 18 | MTBP      |
| chr15:71875790-71888116   | 17 | MYO9A     |
| chr5:178885613-178887787  | 11 | nogene    |
| chr4:110418220-110419105  | 3  | nogene    |
| chr13:29513931-29514149   | 10 | nogene    |
| chrX:148522107-148546313  | 10 | nogene    |
| chr19:11648357-11652053   | 19 | nogene    |
| chrX:129116609-129122193  | 10 | nogene    |
| chr7:73550467-73550767    | 9  | nogene    |

|                           |      |          |
|---------------------------|------|----------|
| chr19:49490482-49491871   | 6    | nogene   |
| chr8:58623219-58635546    | 94   | NSMAF    |
| chr11:77340645-77349287   | 3    | PAK1     |
| chr15:68164730-68176654   | 12   | PIAS1    |
| chr12:42384939-42398994   | 89   | PPHLN1   |
| chr17:60633852-60648082   | 72   | PPM1D    |
| chr8:140761164-140800576  | 54   | PTK2     |
| chr17:2991296-3020595     | 28   | RAP1GAP2 |
| chr7:155700772-155718443  | 25   | RBM33    |
| chr7:155763811-155766655  | 10   | RBM33    |
| chr14:102714422-102721377 | 29   | RCOR1    |
| chr16:2262277-2263287     | 35   | RNPS1    |
| chr3:158122102-158123991  | 1559 | RSRC1    |
| chr6:130175840-130184623  | 16   | SAMD3    |
| chr6:70732377-70798737    | 8    | SMAP1    |
| chr1:245915319-245915640  | 9    | SMYD3    |
| chr12:49460769-49490731   | 141  | SPATS2   |
| chr8:47284027-47294030    | 532  | SPIDR    |
| chr9:88418777-88426591    | 4    | SPIN1    |
| chr14:35013345-35019074   | 6    | SRP54    |
| chr8:73595165-73709162    | 4    | STAU2    |
| chr11:59787036-59797396   | 14   | STX3     |
| chr11:61366044-61367998   | 406  | TMEM138  |
| chr7:66950951-66953369    | 67   | TMEM248  |
| chr18:670691-671451       | 24   | TYMS     |
| chr13:27089882-27105944   | 23   | USP12    |
| chr6:41871563-41891875    | 25   | USP49    |
| chrX:41123470-41123724    | 18   | USP9X    |
| chr8:99134631-99156743    | 33   | VPS13B   |
| chr15:28751487-28754897   | 4    | WHAMMP2  |
| chr9:37302187-37349452    | 21   | ZCCHC7   |
| chr2:20297552-20318645    | 4    | PUM2     |
| chr16:2317282-2319840     | 9    | ABCA3    |
| chr13:95161188-95170628   | 74   | ABCC4    |
| chr7:152800530-152825122  | 13   | ACTR3B   |
| chr2:157737270-157738570  | 5    | ACVR1    |
| chr5:65260599-65291470    | 208  | ADAMTS6  |
| chr12:111792060-111798242 | 9    | ALDH2    |
| chr10:27067156-27079161   | 9    | ANKRD26  |
| chr15:34900621-34904505   | 8    | AQR      |
| chr15:89903215-89910819   | 4    | ARPIN    |
| chr8:130236921-130358143  | 21   | ASAP1    |
| chr1:155395458-155415923  | 14   | ASH1L    |

|                           |     |          |
|---------------------------|-----|----------|
| chr2:233256101-233265143  | 20  | ATG16L1  |
| chr13:32346826-32357929   | 8   | BRCA2    |
| chr22:49797804-49804360   | 23  | BRD1     |
| chr6:89846561-89855544    | 7   | CASP8AP2 |
| chr9:96562692-96565483    | 13  | CDC14B   |
| chr1:193130173-193147965  | 6   | CDC73    |
| chr9:120453455-120458622  | 9   | CDK5RAP2 |
| chr1:180003173-180006567  | 150 | CEP350   |
| chr8:67056518-67059445    | 9   | COP55    |
| chr16:67610823-67621591   | 18  | CTCF     |
| chr7:101916114-101916507  | 13  | CUX1     |
| chr1:160237134-160240370  | 8   | DCAF8    |
| chr22:38494629-38501280   | 117 | DDX17    |
| chr9:123557569-123565648  | 13  | DENND1A  |
| chr15:65715477-65732818   | 3   | DENND4A  |
| chr3:154288865-154295339  | 4   | DHX36    |
| chr13:59861406-59916249   | 5   | DIAPH3   |
| chr10:68459103-68465812   | 12  | DNA2     |
| chr10:127031649-127061776 | 12  | DOCK1    |
| chr6:56900420-56900621    | 14  | DST      |
| chr6:15615266-15637804    | 106 | DTNBP1   |
| chr19:5787380-5787588     | 8   | DUS3L    |
| chr18:49331863-49391645   | 4   | DYM      |
| chr1:245002120-245083688  | 9   | EFCAB2   |
| chr6:52438303-52438591    | 7   | EFHC1    |
| chr22:36523208-36526131   | 18  | EIF3D    |
| chr2:46360637-46361090    | 15  | EPAS1    |
| chr19:45413676-45416897   | 7   | ERCC1    |
| chr12:56133587-56134428   | 17  | ESYT1    |
| chr22:29286922-29287134   | 12  | EWSR1    |
| chr11:73419873-73468492   | 15  | FAM168A  |
| chr12:31282715-31298224   | 3   | FAM60A   |
| chr9:120787768-120788278  | 11  | FBXW2    |
| chr12:120173652-120176217 | 3   | GCN1     |
| chr14:76166662-76176690   | 14  | GPATCH2L |
| chr9:130075635-130092381  | 9   | GPR107   |
| chr9:112403994-112405722  | 26  | HSDL2    |
| chr5:138559863-138561789  | 59  | HSPA9    |
| chr7:23342063-23347734    | 8   | IGF2BP3  |
| chr15:41073427-41079904   | 20  | INO80    |
| chr15:41079700-41087682   | 6   | INO80    |
| chr5:62550366-62561257    | 92  | IPO11    |
| chr20:34489265-34507908   | 9   | ITCH     |

|                           |     |              |
|---------------------------|-----|--------------|
| chr6:17869045-17873437    | 3   | KIF13A       |
| chr1:10320042-10376676    | 29  | KIF1B        |
| chr13:113306484-113310867 | 23  | LAMP1        |
| chr6:79489083-79493750    | 9   | LCA5         |
| chr2:96733518-96738067    | 14  | LMAN2L       |
| chr15:30716219-30721271   | 7   | LOC100288637 |
| chr12:57498156-57504299   | 8   | MARS         |
| chr6:83223759-83253738    | 6   | ME1          |
| chr9:36597221-36633200    | 13  | MELK         |
| chr18:21815615-21847125   | 24  | MIB1         |
| chr1:66946149-66959743    | 11  | MIER1        |
| chr9:20353524-20365744    | 19  | MLLT3        |
| chr18:36220054-36260175   | 6   | MOCOS        |
| chr6:150877633-150885734  | 29  | MTHFD1L      |
| chr8:66572481-66593194    | 13  | MYBL1        |
| chr13:77205255-77217957   | 11  | MYCBP2       |
| chr2:191360630-191370292  | 16  | MYO1B        |
| chr8:95031994-95036494    | 10  | NDUFAF6      |
| chr5:53646232-53658624    | 33  | NDUFS4       |
| chr4:169602007-169602678  | 21  | NEK1         |
| chr6:138496218-138572061  | 8   | NHSL1        |
| chr1:169230717-169237687  | 50  | NME7         |
| chr1:169230717-169310080  | 10  | NME7         |
| chrX:71291830-71294340    | 4   | nogene       |
| chr5:77098654-77100391    | 29  | nogene       |
| chr19:46607865-46608140   | 6   | nogene       |
| chr7:66684351-66724454    | 12  | nogene       |
| chr21:10325780-10340478   | 3   | nogene       |
| chr7:66848488-66880864    | 3   | nogene       |
| chr14:21460507-21460723   | 67  | nogene       |
| chr4:97315664-97323287    | 6   | nogene       |
| chr2:24564294-24593721    | 57  | nogene       |
| chr1:246143821-246193963  | 26  | nogene       |
| chr1:155671353-155681140  | 14  | nogene       |
| chr7:2721272-2722138      | 11  | nogene       |
| chr5:143310096-143314168  | 8   | NR3C1        |
| chr10:79804484-79814716   | 8   | NUTM2B-AS1   |
| chr10:124408541-124412200 | 121 | OAT          |
| chr19:2271384-2271954     | 8   | OAZ1         |
| chr3:38183002-38190839    | 3   | OXR1         |
| chr4:56448417-56448823    | 9   | PAICS        |
| chr3:52641953-52648442    | 33  | PBRM1        |
| chr2:10790718-10793202    | 21  | PDIA6        |

|                           |    |          |
|---------------------------|----|----------|
| chr2:196912881-196922186  | 48 | PGAP1    |
| chr20:35858301-35899648   | 10 | PHF20    |
| chr11:46084165-46092223   | 10 | PHF21A   |
| chr1:113710253-113712113  | 9  | PHTF1    |
| chr10:13280975-13288541   | 3  | PHYH     |
| chr11:85981744-85983973   | 31 | PICALM   |
| chr1:167332469-167376155  | 9  | POU2F1   |
| chr4:105424195-105446502  | 16 | PPA2     |
| chr17:60623520-60623749   | 11 | PPM1D    |
| chr1:202416786-202428929  | 31 | PPP1R12B |
| chr18:9583116-9593874     | 5  | PPP4R1   |
| chr12:110551788-110551968 | 16 | PPTC7    |
| chr4:147653851-147661038  | 5  | PRMT9    |
| chr9:112275843-112288682  | 11 | PTBP3    |
| chr10:87864453-87952259   | 14 | PTEN     |
| chr8:140800458-140890769  | 71 | PTK2     |
| chr2:65090982-65098066    | 16 | RAB1A    |
| chr5:34762196-34796027    | 20 | RAI14    |
| chr18:70086612-70092804   | 28 | RTTN     |
| chr18:70109497-70128546   | 7  | RTTN     |
| chr19:47143493-47150375   | 4  | SAE1     |
| chr1:52974768-52980543    | 4  | SCP2     |
| chr3:47097954-47103423    | 79 | SETD2    |
| chr4:42022837-42049479    | 10 | SLC30A9  |
| chr10:100937401-100947847 | 6  | SLF2     |
| chr16:18834891-18838689   | 4  | SMG1     |
| chr12:49496832-49514613   | 11 | SPATS2   |
| chr1:15916127-15922349    | 4  | SPEN     |
| chr2:45546731-45574723    | 11 | SRBD1    |
| chr17:29648143-29650800   | 48 | SSH2     |
| chr20:44997168-45001353   | 3  | STK4     |
| chr14:52756550-52759754   | 24 | STYX     |
| chr21:32693171-32695282   | 14 | SYNJ1    |
| chr1:28617952-28622165    | 29 | TAF12    |
| chr17:82781588-82783714   | 98 | TBCD     |
| chr15:89584285-89585942   | 6  | TICRR    |
| chr3:129670329-129671264  | 7  | TMCC1    |
| chr8:55750963-55763980    | 3  | TMEM68   |
| chr1:223798214-223800047  | 12 | TP53BP2  |
| chr2:229840821-229860531  | 9  | TRIP12   |
| chr10:69483690-69485215   | 12 | TSPAN15  |
| chr9:33956078-33973237    | 16 | UBAP2    |
| chr6:42662183-42666245    | 4  | UBR2     |

|                           |     |           |
|---------------------------|-----|-----------|
| chr8:102346235-102361626  | 17  | UBR5      |
| chr9:6477621-6482099      | 36  | UHRF2     |
| chr10:11997671-12014184   | 449 | UPF2      |
| chr7:6111124-6146248      | 3   | USP42     |
| chrX:129919174-129919489  | 3   | UTP14A    |
| chr6:144473719-144474759  | 5   | UTRN      |
| chr8:99520898-99556653    | 9   | VPS13B    |
| chr8:99431536-99442635    | 10  | VPS13B    |
| chr14:54984722-54987387   | 25  | WDHD1     |
| chr1:224400949-224404570  | 7   | WDR26     |
| chrX:118396969-118404444  | 12  | WDR44     |
| chr4:1893729-1904378      | 12  | WHSC1     |
| chr2:61498864-61533903    | 3   | XPO1      |
| chr2:173169804-173191177  | 3   | ZAK       |
| chr16:88586599-88599948   | 4   | ZC3H18    |
| chr1:35388909-35390098    | 36  | ZMYM4     |
| chr7:100077302-100079656  | 8   | ZNF3      |
| chr20:33766850-33770292   | 9   | ZNF341    |
| chr19:11724193-11725327   | 13  | ZNF823    |
| chr5:61472680-61494410    | 54  | ZSWIM6    |
| chr15:71916369-71938927   | 7   | MYO9A     |
| chr20:9419806-9437152     | 5   | PLCB4     |
| chr1:151423396-151430841  | 14  | POGZ      |
| chr1:234457666-234472811  | 38  | TARBP1    |
| chr11:46811006-46821268   | 43  | CKAP5     |
| chr14:45095220-45097005   | 59  | PRPF39    |
| chr11:102162455-102206074 | 5   | YAP1      |
| chr12:1702885-1754514     | 78  | ADIPOR2   |
| chr2:23810315-23834078    | 3   | ATAD2B    |
| chr21:39215236-39225197   | 9   | BRWD1     |
| chr7:16681300-16689906    | 69  | BZW2      |
| chr20:3294138-3294629     | 25  | C20orf194 |
| chrX:108621802-108677633  | 14  | COL4A5    |
| chr16:68056363-68066636   | 11  | DUS2      |
| chr5:96912636-96915769    | 17  | ERAP2     |
| chr1:50539591-50596216    | 41  | FAF1      |
| chr11:110435833-110457047 | 3   | FDX1      |
| chr9:96465336-96465778    | 8   | HABP4     |
| chr2:190287585-190296953  | 3   | HIBCH     |
| chr19:38845616-38847434   | 11  | HNRNPL    |
| chr16:27340185-27345020   | 3   | IL4R      |
| chr2:206056197-206063244  | 8   | INO80D    |
| chr14:50462664-50486194   | 14  | MAP4K5    |

|                           |     |            |
|---------------------------|-----|------------|
| chr2:159715680-159729175  | 20  | 7-Mar      |
| chr17:62029540-62063301   | 17  | MED13      |
| chr10:68109673-68122340   | 9   | MYPN       |
| chr6:126522079-126637735  | 3   | nogene     |
| chr14:63391816-63396716   | 3   | PPP2R5E    |
| chr12:925449-930144       | 10  | RAD52      |
| chr12:124807760-124810289 | 12  | SCARB1     |
| chr14:102889559-102903429 | 23  | TRAF3      |
| chr17:623532-632841       | 10  | VPS53      |
| chr20:47224316-47229806   | 6   | ZMYND8     |
| chr16:75617141-75622464   | 5   | ADAT1      |
| chr7:32632542-32679130    | 50  | DPY19L1P1  |
| chr14:75622078-75624752   | 6   | FLVCR2     |
| chr2:53714383-53716743    | 142 | GPR75-ASB3 |
| chr7:139061035-139074030  | 17  | ZC3HAV1    |
| chr9:71870082-71875083    | 18  | ABHD17B    |
| chr2:64551442-64573068    | 4   | AFTPH      |
| chr8:6724869-6755174      | 9   | AGPAT5     |
| chr5:126561082-126570859  | 10  | ALDH7A1    |
| chr10:72196810-72210831   | 6   | ASCC1      |
| chr8:123333877-123337821  | 64  | ATAD2      |
| chr20:51617489-51619043   | 8   | ATP9A      |
| chr7:16674411-16682845    | 10  | BZW2       |
| chr7:16665436-16689906    | 35  | BZW2       |
| chr5:37245478-37247745    | 11  | C5orf42    |
| chr7:23611170-23622227    | 5   | CCDC126    |
| chr12:7367235-7379298     | 11  | CD163L1    |
| chr15:92924320-92939718   | 14  | CHD2       |
| chr7:43633278-43647634    | 10  | COA1       |
| chr7:87391588-87393067    | 19  | CROT       |
| chrX:119542504-119545504  | 12  | CXorf56    |
| chr1:85350414-85496281    | 7   | DDAH1      |
| chr11:9203659-9207632     | 107 | DENND5A    |
| chr17:43498861-43504825   | 14  | DHX8       |
| chr5:31483553-31486562    | 4   | DROSHA     |
| chr11:103222029-103223086 | 30  | DYNC2H1    |
| chr1:21001198-21089213    | 10  | EIF4G3     |
| chr8:690897-716007        | 5   | ERICH1     |
| chr5:137952627-138019146  | 3   | FAM13B     |
| chr5:138006989-138018514  | 15  | FAM13B     |
| chr5:74838964-74841679    | 96  | FAM169A    |
| chr11:72887469-72921950   | 5   | FCHSD2     |
| chr5:108946129-109047198  | 14  | FER        |

|                           |     |              |
|---------------------------|-----|--------------|
| chr22:36501240-36504766   | 9   | FOXRED2      |
| chr10:102358038-102359435 | 36  | GBF1         |
| chr12:109983372-109983694 | 6   | GIT2         |
| chr9:83753257-83768970    | 9   | GKAP1        |
| chr16:74459681-74463479   | 116 | GLG1         |
| chr8:43007846-43013400    | 25  | HOOK3        |
| chr2:238182064-238188257  | 8   | ILKAP        |
| chr12:26681873-26686632   | 8   | ITPR2        |
| chr10:77376009-77404023   | 17  | KCNMA1       |
| chr4:6842066-6858506      | 9   | KIAA0232     |
| chr9:5968018-5988545      | 9   | KIAA2026     |
| chr20:32316217-32316874   | 131 | KIF3B        |
| chr12:50430494-50440549   | 15  | LARP4        |
| chr5:126818921-126832801  | 10  | LMNB1        |
| chr5:142353225-142353583  | 8   | LOC101926941 |
| chr3:197870159-197875775  | 25  | LRCH3        |
| chr2:43943686-43948518    | 13  | LRPPRC       |
| chr16:199061-220747       | 6   | LUC7L        |
| chr6:89781398-89787957    | 8   | MDN1         |
| chr13:23836239-23841488   | 320 | MIPEP        |
| chr1:236835546-236863554  | 4   | MTR          |
| chr15:71999850-72010447   | 18  | MYO9A        |
| chr7:158692841-158693497  | 8   | NCAPG2       |
| chr16:69613898-69626528   | 12  | NFAT5        |
| chr19:39490497-39491703   | 11  | nogene       |
| chr11:77825902-77826149   | 23  | nogene       |
| chr7:100469149-100470401  | 8   | nogene       |
| chr15:45476078-45476552   | 10  | nogene       |
| chr8:133408173-133408387  | 30  | nogene       |
| chr13:24244838-24245617   | 3   | nogene       |
| chr9:97185441-97196594    | 12  | nogene       |
| chr3:15013588-15016254    | 9   | NR2C2        |
| chr11:117159933-117163892 | 93  | PAFAH1B2     |
| chr15:43769517-43770580   | 6   | PDIA3        |
| chr6:42966241-42966447    | 10  | PEX6         |
| chr20:35801490-35812719   | 26  | PHF20        |
| chr4:105386566-105399164  | 13  | PPA2         |
| chr14:29724469-29725674   | 14  | PRKD1        |
| chr8:47918276-47930012    | 9   | PRKDC        |
| chr6:31622726-31623909    | 9   | PRRC2A       |
| chr17:42838730-42839380   | 162 | PSME3        |
| chr4:86693586-86717117    | 10  | PTPN13       |
| chr1:29282675-29284869    | 17  | PTPRU        |



|                           |     |         |
|---------------------------|-----|---------|
| chr20:34031521-34072330   | 13  | RALY    |
| chr1:235148403-235155112  | 11  | RBM34   |
| chr11:14294470-14295855   | 27  | RRAS2   |
| chr14:30715923-30734858   | 194 | SCFD1   |
| chr2:179172119-179229524  | 19  | SESTD1  |
| chr17:59088290-59104394   | 12  | TRIM37  |
| chr14:90695499-90786328   | 10  | TTC7B   |
| chr2:112485916-112520425  | 10  | TTL     |
| chr6:42676055-42679832    | 164 | UBR2    |
| chr6:144748245-144774364  | 6   | UTRN    |
| chr17:59764970-59811786   | 11  | VMP1    |
| chr2:63962057-63984019    | 20  | VPS54   |
| chr7:75057528-75058769    | 4   | WBSCR16 |
| chr4:84695969-84709347    | 10  | WDFY3   |
| chr2:127724332-127726777  | 9   | WDR33   |
| chr2:216190224-216194986  | 32  | XRCC5   |
| chr3:183715143-183724531  | 12  | YEATS2  |
| chr3:183715143-183718592  | 15  | YEATS2  |
| chr19:3651825-3667353     | 23  | PIP5K1C |
| chr1:10256246-10261970    | 12  | KIF1B   |
| chr2:182952404-182957596  | 10  | NCKAP1  |
| chr16:53307680-53308854   | 29  | CHD9    |
| chr20:16427103-16429982   | 12  | KIF16B  |
| chr3:41896821-41911659    | 9   | ULK4    |
| chr17:57879610-57885879   | 3   | CUEDC1  |
| chr16:15873490-15884205   | 18  | FOPNL   |
| chr6:31412324-31507300    | 152 | MICA    |
| chr22:29988479-29991670   | 14  | MTMR3   |
| chr12:112446275-112457379 | 11  | PTPN11  |
| chr8:53984362-54000050    | 11  | TCEA1   |
| chr2:227491546-227536993  | 27  | AGFG1   |
| chr15:99808146-99877148   | 5   | nogene  |
| chr12:27714779-27735556   | 12  | MRPS35  |
| chr8:55782747-55796152    | 5   | TGS1    |
| chrX:80707426-80719656    | 172 | BRWD3   |
| chr4:51863436-51877854    | 695 | DCUN1D4 |
| chr8:140539319-140541358  | 9   | AGO2    |
| chr17:30803900-30804108   | 19  | CRLF3   |
| chr11:9160712-9170777     | 14  | DENND5A |
| chr12:112486474-112489175 | 17  | PTPN11  |
| chr9:123179006-123184298  | 28  | STRBP   |
| chr17:48916075-48922937   | 20  | UBE2Z   |
| chr3:11347876-11380052    | 17  | ATG7    |

|                           |     |           |
|---------------------------|-----|-----------|
| chr22:32479132-32485209   | 21  | FBXO7     |
| chr5:33546058-33549383    | 10  | ADAMTS12  |
| chr2:202825694-202829016  | 10  | ICA1L     |
| chr7:66551524-66578727    | 9   | nogene    |
| chr1:28569908-28570342    | 9   | nogene    |
| chr10:46003933-46004526   | 7   | nogene    |
| chr17:76385654-76385962   | 10  | SPHK1     |
| chr2:45573206-45585774    | 11  | SRBD1     |
| chr9:113330983-113336440  | 10  | WDR31     |
| chr4:145885677-145903215  | 19  | ZNF827    |
| chr11:130126699-130135715 | 37  | APLP2     |
| chr2:197459931-197470171  | 11  | COQ10B    |
| chr12:108678271-108701323 | 140 | CORO1C    |
| chr11:43830975-43840064   | 21  | HSD17B12  |
| chr1:94732257-94743993    | 13  | LINC01057 |
| chr7:149018991-149021147  | 162 | PDIA4     |
| chr1:30941150-30942123    | 11  | PUM1      |
| chr19:651610-652884       | 49  | RNF126    |
| chr2:202513718-202520201  | 8   | BMPR2     |
| chr7:129657342-129690546  | 14  | NRF1      |
| chr5:40767465-40771863    | 3   | PRKAA1    |
| chr3:57831382-57864716    | 10  | SLMAP     |
| chr20:58418210-58439025   | 8   | VAPB      |
| chr10:74589281-74670269   | 21  | ADK       |
| chr15:72760406-72780322   | 61  | ADPGK     |
| chr12:50780139-50814439   | 4   | ATF1      |
| chrX:77616612-77620532    | 10  | ATRX      |
| chr12:111513356-111520076 | 37  | ATXN2     |
| chr12:32305663-32306122   | 7   | BICD1     |
| chr7:140749286-140754233  | 5   | BRAF      |
| chr1:230663140-230679052  | 20  | COG2      |
| chr17:63787033-63792562   | 4   | DDX42     |
| chr14:95132514-95141748   | 9   | DICER1    |
| chr3:132499125-132500913  | 15  | DNAJC13   |
| chrX:118654601-118654961  | 28  | DOCK11    |
| chr3:172769006-172786574  | 61  | ECT2      |
| chr3:47498285-47501851    | 11  | ELP6      |
| chr2:241407536-241434321  | 25  | FARP2     |
| chr5:151786602-151803996  | 12  | G3BP1     |
| chr9:124923094-124938866  | 24  | GOLGA1    |
| chr7:26196806-26197732    | 13  | HNRNPA2B1 |
| chr19:8468773-8474244     | 4   | HNRNPM    |
| chr1:169972512-169992255  | 8   | KIFAP3    |

|                           |     |         |
|---------------------------|-----|---------|
| chr4:165219933-165299656  | 9   | KLHL2   |
| chr4:102664684-102674070  | 8   | MANBA   |
| chr1:53789132-53797144    | 25  | NDC1    |
| chr19:3425105-3435207     | 26  | NFIC    |
| chr3:104764378-104818695  | 3   | nogene  |
| chr10:91807141-91807445   | 24  | nogene  |
| chr18:14049774-14057515   | 14  | nogene  |
| chr1:113074816-113078735  | 10  | nogene  |
| chr11:83163678-83164401   | 14  | PCF11   |
| chr16:70010750-70018097   | 124 | PDXDC2P |
| chrX:78122834-78125425    | 10  | PGK1    |
| chr8:140793353-140864399  | 8   | PTK2    |
| chr1:75790151-75790517    | 40  | RABGGTB |
| chr6:34421829-34424668    | 8   | RPS10   |
| chr5:235143-236599        | 14  | SDHA    |
| chr10:7227854-7285954     | 15  | SFMBT2  |
| chr8:66813852-66831311    | 5   | SGK3    |
| chr14:50129960-50153173   | 3   | SOS2    |
| chr1:48395266-48403882    | 20  | SPATA6  |
| chr6:43178882-43179066    | 9   | SRF     |
| chr3:98756368-98757451    | 3   | ST3GAL6 |
| chr3:136357719-136363467  | 12  | STAG1   |
| chr6:33432160-33432806    | 26  | SYNGAP1 |
| chr17:29517452-29522519   | 18  | TAOK1   |
| chr6:133980081-133987168  | 9   | TBPL1   |
| chr11:12764178-12902113   | 8   | TEAD1   |
| chr2:170015280-170061443  | 14  | UBR3    |
| chr2:61339350-61339681    | 6   | USP34   |
| chr1:21747066-21751615    | 13  | USP48   |
| chr15:50432337-50459162   | 8   | USP8    |
| chr16:74923925-74951543   | 28  | WDR59   |
| chr6:2768690-2770361      | 10  | WRNIP1  |
| chr3:183710168-183728851  | 17  | YEATS2  |
| chr11:130260855-130288893 | 14  | ZBTB44  |
| chr3:179337168-179337431  | 9   | nogene  |
| chr20:25314924-25320318   | 13  | ABHD12  |
| chr2:232087486-232088040  | 26  | DIS3L2  |
| chr16:18841564-18850467   | 12  | SMG1    |
| chr2:9350807-9368519      | 192 | ASAP2   |
| chr12:26924354-26928905   | 4   | ASUN    |
| chr1:93588976-93592393    | 4   | BCAR3   |
| chr9:135850136-135881794  | 13  | CAMSAP1 |
| chr11:77616205-77629899   | 4   | CLNS1A  |

|                           |      |                 |
|---------------------------|------|-----------------|
| chr6:37458611-37463008    | 47   | CMTR1           |
| chr14:22947600-22952683   | 4    | HAUS4           |
| chr15:41055246-41056706   | 36   | INO80           |
| chr17:16101249-16101805   | 52   | NCOR1           |
| chr15:90759501-90759701   | 8    | nogene          |
| chr2:44502688-44505730    | 16   | nogene          |
| chr1:151224247-151236763  | 23   | PIP5K1A         |
| chr7:99618524-99621574    | 51   | ZSCAN25         |
| chr10:68754713-68757377   | 10   | CCAR1           |
| chr3:132626690-132644896  | 20   | ACAD11          |
| chr1:37700435-37703347    | 27   | CDCA8           |
| chr16:3850296-3851009     | 840  | CREBBP          |
| chr1:20840855-20886371    | 10   | EIF4G3          |
| chr1:1804418-1817875      | 219  | GNB1            |
| chr21:33414887-33432871   | 24   | IFNGR2          |
| chr2:95834069-95834898    | 9    | nogene          |
| chr16:74660931-74664745   | 10   | RFWD3           |
| chr17:32171042-32176213   | 146  | RHOT1           |
| chr2:27668842-27677924    | 20   | SLC4A1AP        |
| chr21:15833347-15842540   | 85   | USP25           |
| chr5:113579585-113584479  | 7    | YTHDC2          |
| chr5:34175821-34182867    | 40   | nogene          |
| chr7:118185646-118188405  | 32   | LSM8            |
| chr3:128629950-128632157  | 10   | RPN1            |
| chr17:15545784-15547148   | 48   | TVP23C-CDRT4    |
| chr20:25020009-25023641   | 4    | ACSS1           |
| chr2:113931300-113942359  | 4    | ACTR3           |
| chr5:140509636-140510181  | 67   | ANKHD1-EIF4EBP3 |
| chr8:144580845-144581277  | 20   | ARHGAP39        |
| chr1:93567278-93567851    | 1098 | BCAR3           |
| chr5:179705678-179716294  | 27   | CANX            |
| chr11:47482694-47489024   | 24   | CELF1           |
| chr11:107326005-107336713 | 11   | CWF19L2         |
| chr4:53383772-53444103    | 19   | FIP1L1          |
| chr12:100591735-100612141 | 29   | GAS2L3          |
| chr16:67683379-67685802   | 11   | GFOD2           |
| chr2:196789203-196791460  | 24   | GTF3C3          |
| chr12:112175735-112176702 | 9    | HECTD4          |
| chr10:27173117-27181581   | 25   | MASTL           |
| chr5:139317052-139319501  | 50   | MATR3           |
| chr17:2438108-2464350     | 11   | METTTL6         |
| chr16:47122656-47132025   | 18   | NETO2           |
| chr14:39654844-39655808   | 15   | nogene          |

|                           |    |          |
|---------------------------|----|----------|
| chr6:82057938-82059679    | 10 | nogene   |
| chr22:28547673-28550151   | 10 | nogene   |
| chr5:120672015-120673393  | 3  | nogene   |
| chr12:121228532-121229099 | 7  | P2RX4    |
| chr21:43004325-43021431   | 28 | PKNOX1   |
| chr2:86765026-86766024    | 45 | RMND5A   |
| chr8:42861744-42889414    | 4  | RNF170   |
| chrX:55729293-55731586    | 37 | RRAGB    |
| chr8:73673106-73709177    | 6  | STAU2    |
| chr17:63314387-63319090   | 19 | TANC2    |
| chr18:31897785-31909760   | 21 | TRAPPC8  |
| chr2:3338016-3354633      | 6  | TSSC1    |
| chr17:21004201-21004990   | 7  | USP22    |
| chr2:218234351-218239484  | 5  | ARPC2    |
| chr19:334399-336173       | 24 | MIER2    |
| chr1:805798-810170        | 48 | nogene   |
| chr3:196812218-196814568  | 48 | PAK2     |
| chr9:135482682-135484082  | 9  | PPP1R26  |
| chr2:30459551-30533314    | 11 | LCLAT1   |
| chr6:77211980-77273307    | 28 | nogene   |
| chr7:128335542-128336042  | 5  | RBM28    |
| chr4:41260646-41264161    | 8  | UCHL1    |
| chr2:40428474-40430304    | 10 | SLC8A1   |
| chr11:33328509-33341686   | 18 | HIPK3    |
| chr6:77151200-77151974    | 27 | nogene   |
| chr5:65291328-65334458    | 19 | ADAMTS6  |
| chr8:33372643-33389798    | 15 | FUT10    |
| chr4:41666560-41676462    | 30 | LIMCH1   |
| chrX:123633952-123639027  | 33 | THOC2    |
| chr19:19645873-19646347   | 49 | ATP13A1  |
| chr10:12081471-12097996   | 9  | DHTKD1   |
| chr1:92042822-92045660    | 29 | EPHX4    |
| chr19:45263112-45266281   | 50 | MARK4    |
| chr7:151564077-151570225  | 19 | PRKAG2   |
| chr5:146223402-146237432  | 30 | RBM27    |
| chr19:6026162-6040241     | 15 | RFX2     |
| chr1:41113282-41152741    | 6  | SCMH1    |
| chr12:116096668-116118129 | 3  | MED13L   |
| chr3:11807832-11817337    | 13 | TAMM41   |
| chr4:119596522-119607297  | 13 | PDE5A    |
| chr12:2920762-2922402     | 27 | TULP3    |
| chr12:44143524-44211387   | 48 | TMEM117  |
| chr10:102029637-102040125 | 17 | C10orf76 |

|                           |     |           |
|---------------------------|-----|-----------|
| chr2:232130618-232136719  | 33  | DIS3L2    |
| chr21:33432176-33432871   | 52  | IFNGR2    |
| chr2:238182064-238194870  | 98  | ILKAP     |
| chr19:35729158-35730462   | 12  | KMT2B     |
| chr12:68302619-68303913   | 19  | MDM1      |
| chr17:61984170-61987128   | 12  | MED13     |
| chr5:65704278-65708558    | 17  | SGTB      |
| chr17:18305111-18306966   | 32  | TOP3A     |
| chr7:76617965-76618390    | 15  | nogene    |
| chr2:36464533-36479694    | 42  | CRIM1     |
| chr1:23333517-23341020    | 11  | HNRNPR    |
| chr2:86024014-86024892    | 10  | nogene    |
| chr6:43029883-43030596    | 8   | nogene    |
| chr20:38057537-38066256   | 13  | RPRD1B    |
| chr1:168183901-168191500  | 10  | TIPRL     |
| chr15:89790459-89793126   | 13  | ANPEP     |
| chr2:61872081-61883548    | 23  | CCT4      |
| chr8:86528535-86532580    | 62  | CPNE3     |
| chr4:5663106-5665649      | 125 | EVC2      |
| chr5:108798123-108835807  | 15  | FER       |
| chr6:89678598-89680751    | 8   | MDN1      |
| chrX:40712913-40715220    | 21  | MED14     |
| chr7:66427948-66430017    | 11  | nogene    |
| chr1:19904266-19904987    | 19  | OTUD3     |
| chr2:74046277-74080591    | 15  | TET3      |
| chr16:21971524-21976243   | 19  | UQCRC2    |
| chr12:820496-827262       | 4   | WNK1      |
| chr14:23033367-23033674   | 268 | PSMB5     |
| chr10:123160406-123162828 | 3   | BUB3      |
| chr10:27039964-27043567   | 27  | ANKRD26   |
| chr2:131038852-131043583  | 15  | ARHGEF4   |
| chr1:155357315-155357749  | 19  | ASH1L     |
| chr6:97254556-97268002    | 16  | MMS22L    |
| chr17:47590716-47605552   | 25  | NPEPPS    |
| chr2:70051202-70085624    | 75  | PCBP1-AS1 |
| chr17:80837921-80857900   | 4   | RPTOR     |
| chr17:69273942-69284072   | 29  | ABCA5     |
| chr19:38152839-38164906   | 13  | SIPA1L3   |
| chr18:21536041-21564317   | 5   | ESCO1     |
| chr12:2873976-2874525     | 92  | FOXM1     |
| chr2:24739431-24742186    | 3   | NCOA1     |
| chr1:26941456-26941818    | 50  | NUDC      |
| chr1:88807312-88822003    | 15  | PKN2      |

|                           |     |              |
|---------------------------|-----|--------------|
| chr12:77966228-77968702   | 14  | NAV3         |
| chr5:14687520-14693094    | 11  | OTULIN       |
| chr10:3158913-3160330     | 54  | PITRM1       |
| chr3:134175608-134195182  | 339 | RYK          |
| chr15:43446386-43447485   | 9   | TP53BP1      |
| chr11:110136662-110163379 | 8   | ZC3H12C      |
| chr3:183866624-183868060  | 9   | PARL         |
| chr1:46678468-46691937    | 7   | EFCAB14      |
| chr9:122984484-122986419  | 10  | RABGAP1      |
| chr14:53091784-53103856   | 89  | DDHD1        |
| chr7:42040037-42048696    | 29  | GLI3         |
| chr15:40009613-40026089   | 6   | EIF2AK4      |
| chr12:6766685-6770848     | 9   | nogene       |
| chr6:73479731-73482620    | 23  | MTO1         |
| chr4:84765809-84766372    | 10  | WDFY3        |
| chr3:50065030-50066502    | 425 | RBM6         |
| chr14:60811986-60879835   | 20  | MNAT1        |
| chr2:173761578-173811253  | 11  | nogene       |
| chr20:46610445-46613725   | 5   | SLC13A3      |
| chr11:61321594-61323094   | 11  | DDB1         |
| chr5:180549930-180571432  | 9   | CNOT6        |
| chr15:65463760-65474288   | 12  | DPP8         |
| chr1:155906094-155906516  | 56  | nogene       |
| chr10:72741721-72742273   | 80  | nogene       |
| chr9:109087172-109093591  | 13  | TMEM245      |
| chr1:97691716-97721671    | 9   | DPYD         |
| chr2:32488587-32500109    | 33  | BIRC6        |
| chr2:28237201-28244862    | 11  | BRE          |
| chr5:137952627-137953465  | 3   | FAM13B       |
| chr8:47900372-47930012    | 9   | PRKDC        |
| chr3:47745907-47772936    | 19  | SMARCC1      |
| chr17:21019083-21028674   | 3   | USP22        |
| chr4:173795520-173856466  | 4   | nogene       |
| chr8:38295795-38299590    | 4   | WHSC1L1      |
| chr11:88309162-88312554   | 8   | CTSC         |
| chr15:64213889-64216713   | 10  | CSNK1G1      |
| chr11:73843246-73844976   | 36  | MRPL48       |
| chr10:68165701-68175461   | 24  | MYPN         |
| chr15:101701085-101702385 | 4   | TARSL2       |
| chr1:243199059-243225321  | 130 | CEP170       |
| chr5:138006989-138019146  | 30  | FAM13B       |
| chr1:240188206-240211235  | 100 | FMN2         |
| chr19:27797753-27798176   | 12  | LOC101927151 |

|                           |     |           |
|---------------------------|-----|-----------|
| chr5:37342548-37350265    | 24  | NUP155    |
| chr3:196806578-196812851  | 6   | PAK2      |
| chr1:27838698-27843330    | 20  | PPP1R8    |
| chr14:81485671-81490465   | 5   | SEL1L     |
| chr17:80222654-80227960   | 6   | SLC26A11  |
| chr6:99482752-99510230    | 7   | USP45     |
| chr19:39889478-39902837   | 11  | FCGBP     |
| chr6:85526125-85542043    | 7   | SNX14     |
| chr4:22401391-22402799    | 14  | ADGRA3    |
| chr22:38949111-38992149   | 9   | APOBEC3B  |
| chr2:207555627-207577655  | 38  | CREB1     |
| chr15:76285636-76292700   | 13  | ETFA      |
| chr5:108867766-108883518  | 45  | FER       |
| chr8:30607056-30635123    | 7   | GTF2E2    |
| chr3:149074214-149076047  | 10  | HLTF      |
| chr17:44933922-44934430   | 8   | KIF18B    |
| chr2:186081329-186086370  | 11  | LINC01473 |
| chr6:34341861-34343032    | 7   | NUDT3     |
| chr16:14580873-14593378   | 10  | PARN      |
| chr16:14997752-15030056   | 7   | PDXDC1    |
| chr20:62139074-62140944   | 690 | PSMA7     |
| chr12:929763-930144       | 45  | RAD52     |
| chr11:117279907-117280259 | 63  | RNF214    |
| chr2:45413113-45488331    | 9   | SRBD1     |
| chr2:9919040-9919820      | 6   | TAF1B     |
| chr21:37108391-37147603   | 13  | TTC3      |
| chr7:139251955-139266403  | 23  | UBN2      |
| chr17:1361091-1365058     | 32  | YWHAE     |
| chr1:52813535-52816629    | 8   | ZYG11B    |
| chr5:112992153-113004077  | 6   | DCP2      |
| chr14:60793043-60879835   | 10  | MNAT1     |
| chr12:106842588-106843947 | 203 | RIC8B     |
| chr14:50180571-50188700   | 7   | SOS2      |
| chr20:49151581-49154071   | 9   | STAU1     |
| chrX:123686547-123706949  | 9   | THOC2     |
| chr5:159272022-159275246  | 11  | UBLCP1    |
| chr5:80767932-80813741    | 19  | MSH3      |
| chr2:172558707-172562291  | 12  | PDK1      |
| chr5:132927120-132937740  | 6   | AFF4      |
| chr2:111802427-111803839  | 33  | ANAPC1    |
| chr19:46002982-46008301   | 3   | CCDC61    |
| chr12:28225794-28307749   | 19  | CCDC91    |
| chr6:47607926-47612536    | 38  | CD2AP     |



|                           |     |           |
|---------------------------|-----|-----------|
| chr1:227142944-227147559  | 4   | CDC42BPA  |
| chr1:160305432-160305773  | 8   | COPA      |
| chr8:96834972-96880005    | 25  | CPQ       |
| chr1:112412193-112449172  | 3   | CTTNBP2NL |
| chr3:197194424-197194589  | 104 | DLG1      |
| chr19:2185854-2193783     | 10  | DOT1L     |
| chr14:102002536-102002965 | 30  | DYNC1H1   |
| chr3:172362632-172381093  | 18  | FNDC3B    |
| chr16:74496440-74508925   | 6   | GLG1      |
| chr16:1809753-1823037     | 5   | HAGH      |
| chr3:195685817-195689438  | 11  | LINC00969 |
| chr1:187254375-187329060  | 51  | LINC01036 |
| chr13:46711790-46733998   | 14  | LRCH1     |
| chr2:134250049-134254644  | 8   | MGAT5     |
| chr14:75095371-75105996   | 5   | NEK9      |
| chr19:57778749-57790398   | 8   | nogene    |
| chr8:16495792-16514838    | 21  | nogene    |
| chr8:100712361-100713181  | 53  | PABPC1    |
| chr3:52411028-52414587    | 20  | PHF7      |
| chr20:32215268-32216721   | 10  | POFUT1    |
| chrX:24821451-24888122    | 17  | POLA1     |
| chr6:35421819-35424779    | 4   | PPARD     |
| chr7:103361956-103364307  | 4   | PSMC2     |
| chr1:17422202-17425684    | 3   | RCC2      |
| chr1:176043185-176085890  | 23  | RFWD2     |
| chr9:91756070-91775818    | 11  | ROR2      |
| chr12:45931505-45934505   | 9   | SCAF11    |
| chr7:2269558-2275229      | 5   | SNX8      |
| chr1:48411463-48453131    | 9   | SPATA6    |
| chr18:12463350-12479871   | 8   | SPIRE1    |
| chr3:136500222-136502779  | 4   | STAG1     |
| chr18:192841-199316       | 13  | USP14     |
| chr11:61132419-61138835   | 4   | VPS37C    |
| chr14:96833466-96945382   | 8   | VRK1      |
| chr3:167554649-167560228  | 3   | WDR49     |
| chr12:46239678-46256769   | 4   | SLC38A1   |
| chr17:43104121-43104956   | 11  | BRCA1     |
| chr5:65521474-65542848    | 9   | CENPK     |
| chr19:5787378-5787588     | 3   | DUS3L     |
| chr1:28987430-28987905    | 16  | EPB41     |
| chr19:35729296-35729945   | 9   | KMT2B     |
| chr6:69737941-69752356    | 3   | LMBRD1    |
| chr2:46907809-46909177    | 32  | MCFD2     |

|                           |     |          |
|---------------------------|-----|----------|
| chr14:50806736-50822077   | 10  | NIN      |
| chr6:141824165-141910011  | 18  | nogene   |
| chrX:78113743-78114160    | 3   | PGK1     |
| chr20:58271362-58272875   | 152 | PPP4R1L  |
| chr8:140793353-140890769  | 9   | PTK2     |
| chr1:176149005-176163891  | 81  | RFWD2    |
| chr3:47714414-47772936    | 24  | SMARCC1  |
| chr22:40312504-40316012   | 3   | TNRC6B   |
| chr10:11942664-11952249   | 11  | UPF2     |
| chr14:102325984-102326887 | 27  | ZNF839   |
| chr9:33528726-33529173    | 14  | ANKRD18B |
| chr4:150193137-150224558  | 6   | DCLK2    |
| chr1:87072933-87092669    | 40  | HS2ST1   |
| chr11:94445809-94447438   | 405 | MRE11A   |
| chr10:49932099-49935142   | 15  | PARG     |
| chr9:132927200-132928952  | 5   | TSC1     |
| chr11:76888497-76926667   | 15  | ACER3    |
| chr1:202950929-202954307  | 11  | ADIPOR1  |
| chr7:141611194-141633980  | 9   | AGK      |
| chr6:32169469-32169965    | 7   | AGPAT1   |
| chr12:111781917-111785346 | 9   | ALDH2    |
| chr17:4194977-4197577     | 10  | ANKFY1   |
| chr17:4216982-4249248     | 6   | ANKFY1   |
| chr5:112775628-112792529  | 11  | APC      |
| chr20:48984728-48985613   | 9   | ARFGEF2  |
| chr16:24968350-24970580   | 75  | ARHGAP17 |
| chr17:68401359-68420506   | 12  | ARSG     |
| chr8:53756554-53772167    | 12  | ATP6V1H  |
| chr16:87975047-88006265   | 13  | BANP     |
| chr2:214767481-214792445  | 26  | BARD1    |
| chr2:32439507-32441462    | 34  | BIRC6    |
| chr17:67928354-67940656   | 29  | BPTF     |
| chr17:43051062-43063951   | 11  | BRCA1    |
| chr11:76513385-76516312   | 50  | C11orf30 |
| chr1:42773562-42775479    | 58  | C1orf50  |
| chr19:3620296-3620706     | 7   | CACTIN   |
| chr11:34079627-34083041   | 15  | CAPRIN1  |
| chr20:33606955-33629914   | 3   | CBFA2T2  |
| chr10:32471063-32474023   | 346 | CCDC7    |
| chr2:61873001-61880394    | 17  | CCT4     |
| chr10:124038514-124044919 | 17  | CHST15   |
| chr16:69155870-69163178   | 15  | CIRH1A   |
| chr11:46790075-46790583   | 43  | CKAP5    |

|                           |     |           |
|---------------------------|-----|-----------|
| chr3:33606590-33608626    | 5   | CLASP2    |
| chr3:33619602-33632374    | 37  | CLASP2    |
| chr6:99377385-99383824    | 13  | COQ3      |
| chr10:92143028-92181019   | 13  | CPEB3     |
| chr11:61411768-61429290   | 10  | CPSF7     |
| chr10:68941059-68943257   | 4   | DDX50     |
| chr17:56848695-56849232   | 9   | DGKE      |
| chr5:55274613-55281515    | 9   | DHX29     |
| chr1:225152004-225153826  | 9   | DNAH14    |
| chr1:21272698-21279332    | 6   | ECE1      |
| chr9:137728348-137758011  | 20  | EHMT1     |
| chr12:53037408-53038411   | 54  | EIF4B     |
| chr2:54928312-54928751    | 43  | EML6      |
| chr2:120127687-120146289  | 65  | EPB41L5   |
| chr1:44313168-44339322    | 10  | ERI3      |
| chr18:21539919-21566206   | 9   | ESCO1     |
| chr2:72465159-72480750    | 17  | EXOC6B    |
| chr3:56633043-56633966    | 10  | FAM208A   |
| chr10:50104041-50113997   | 5   | FAM21A    |
| chr10:45728861-45746647   | 18  | FAM21C    |
| chr16:87342876-87347250   | 109 | FBXO31    |
| chr5:73006444-73017308    | 18  | FCHO2     |
| chr17:41818088-41818527   | 43  | FKBP10    |
| chr1:240257944-240294883  | 13  | FMN2      |
| chr3:81699972-81705613    | 19  | GBE1      |
| chr17:36581343-36581538   | 11  | GGNBP2    |
| chr10:87053341-87062835   | 10  | GLUD1     |
| chr16:58708078-58709567   | 27  | GOT2      |
| chr10:67954594-67988835   | 13  | HERC4     |
| chr9:94415157-94441099    | 14  | HIATL1    |
| chr5:79439009-79451121    | 14  | HOMER1    |
| chr2:197490196-197495376  | 11  | HSPD1     |
| chr2:202785917-202811789  | 11  | ICA1L     |
| chr9:108922841-108929921  | 4   | IKBKAP    |
| chr15:41081019-41085583   | 17  | INO80     |
| chr12:30676497-30684457   | 9   | IPO8      |
| chr16:19733697-19735450   | 19  | IQCK      |
| chr16:47218867-47459175   | 8   | ITFG1     |
| chr5:138398177-138400012  | 27  | KDM3B     |
| chr12:122569680-122574380 | 16  | KNTC1     |
| chr14:50265357-50294246   | 18  | L2HGDH    |
| chrX:102839800-102865152  | 6   | LINC00630 |
| chr7:156796388-156836885  | 17  | LMBR1     |

|                           |     |              |
|---------------------------|-----|--------------|
| chr6:29063929-29065172    | 12  | LOC100129636 |
| chrX:3817544-3818500      | 99  | LOC389906    |
| chr16:55545734-55551102   | 11  | LPCAT2       |
| chr18:2951054-2960849     | 37  | LPIN2        |
| chr6:53878992-53904462    | 9   | LRRC1        |
| chr19:34194477-34215661   | 49  | LSM14A       |
| chr17:61984170-61985090   | 257 | MED13        |
| chr12:131838194-131841800 | 13  | MMP17        |
| chr10:93408786-93426158   | 13  | MYOF         |
| chr2:177231888-177234271  | 113 | NFE2L2       |
| chr10:94352309-94355093   | 9   | NOC3L        |
| chr4:34993201-35005121    | 8   | nogene       |
| chr11:28227994-28230985   | 13  | nogene       |
| chr1:72376422-72391566    | 8   | nogene       |
| chr5:171398707-171398915  | 12  | nogene       |
| chr3:106741560-106750905  | 8   | nogene       |
| chr4:163986497-163988709  | 5   | nogene       |
| chr11:122704781-122705172 | 3   | nogene       |
| chr4:26338840-26339362    | 8   | nogene       |
| chr3:15030274-15034809    | 3   | NR2C2        |
| chr10:18609844-18616293   | 34  | NSUN6        |
| chr8:109243150-109245481  | 12  | NUDCD1       |
| chr6:87601783-87606021    | 16  | ORC3         |
| chr22:42909426-42912157   | 15  | PACSIN2      |
| chr14:96542242-96565214   | 14  | PAPOLA       |
| chr13:24459043-24475596   | 12  | PARP4        |
| chr16:70130422-70132300   | 30  | PDPR         |
| chr4:39837855-39845880    | 9   | PDS5A        |
| chr3:170136418-170178938  | 94  | PHC3         |
| chr1:6619802-6620337      | 13  | PHF13        |
| chr16:47497398-47562495   | 12  | PHKB         |
| chr2:208276711-208288818  | 8   | PIKFYVE      |
| chr4:120799660-120821345  | 3   | PRDM5        |
| chr9:69732138-69741858    | 5   | PTAR1        |
| chr8:140761164-140803650  | 47  | PTK2         |
| chr8:140830471-140925749  | 18  | PTK2         |
| chr18:12825809-12831041   | 10  | PTPN2        |
| chr5:160422301-160427873  | 11  | PTTG1        |
| chr16:461403-471389       | 4   | RAB11FIP3    |
| chr1:51933317-51937412    | 4   | RAB3B        |
| chr8:52676368-52684013    | 8   | RB1CC1       |
| chr9:5732387-5738538      | 15  | RIC1         |
| chr17:1842802-1853189     | 583 | RPA1         |

|                           |    |         |
|---------------------------|----|---------|
| chr1:150446225-150446401  | 7  | RPRD2   |
| chrX:72273800-72276234    | 14 | RPS4X   |
| chr6:89372436-89387590    | 29 | RRAGD   |
| chr19:10224011-10224947   | 5  | S1PR2   |
| chr10:75150513-75164740   | 31 | SAMD8   |
| chr20:18527495-18542402   | 30 | SEC23B  |
| chr7:45744996-45759174    | 11 | SEPT7P2 |
| chr12:128814774-128815652 | 14 | SLC15A4 |
| chr6:87477361-87488102    | 10 | SLC35A1 |
| chr4:103066326-103067592  | 14 | SLC9B2  |
| chr17:76558373-76559043   | 48 | SNHG16  |
| chr20:17955364-17961326   | 20 | SNX5    |
| chr2:230461261-230474447  | 6  | SP100   |
| chr16:30728965-30734008   | 35 | SRCAP   |
| chr14:30950862-30956242   | 20 | STRN3   |
| chr9:112080073-112098662  | 17 | SUSD1   |
| chr8:119803877-119819506  | 4  | TAF2    |
| chr14:102376649-102414793 | 11 | TECPR2  |
| chr11:9286454-9299701     | 34 | TMEM41B |
| chr7:128967279-129001234  | 8  | TNPO3   |
| chr7:5324213-5333049      | 20 | TNRC18  |
| chr8:140360049-140365686  | 10 | TRAPPC9 |
| chr17:59047682-59057054   | 10 | TRIM37  |
| chr3:3137259-3148187      | 8  | TRNT1   |
| chr17:21017941-21021226   | 51 | USP22   |
| chr2:61325374-61339681    | 27 | USP34   |
| chrX:41144521-41151057    | 10 | USP9X   |
| chr17:623532-631628       | 35 | VPS53   |
| chrX:118396969-118398470  | 7  | WDR44   |
| chr7:158901738-158906091  | 24 | WDR60   |
| chr17:27303366-27311616   | 21 | WSB1    |
| chr2:61481184-61484105    | 9  | XPO1    |
| chr16:28132333-28146203   | 3  | XPO6    |
| chr19:34929883-34933723   | 10 | ZNF30   |
| chr11:113741693-113744040 | 11 | ZW10    |
| chr1:147275353-147285487  | 82 | CHD1L   |
| chr3:197104902-197130671  | 5  | DLG1    |
| chr7:23123776-23125172    | 4  | KLHL7   |
| chr2:39331916-39356339    | 40 | MAP4K3  |
| chr6:138441982-138447193  | 10 | NHSL1   |
| chr17:42227528-42232137   | 5  | STAT5B  |
| chr7:140739811-140754233  | 16 | BRAF    |
| chr3:38499680-38506968    | 6  | EXOG    |

|                           |     |          |
|---------------------------|-----|----------|
| chr6:31623731-31626162    | 20  | PRRC2A   |
| chr9:132346260-132349435  | 6   | SETX     |
| chr16:18828030-18834438   | 11  | SMG1     |
| chr16:3979115-3983440     | 98  | ADCY9    |
| chr10:72161537-72213331   | 10  | ASCC1    |
| chr10:121841081-121924329 | 9   | ATE1     |
| chr11:74118227-74133557   | 8   | C2CD3    |
| chr19:17559310-17560465   | 26  | COLGALT1 |
| chr5:134781132-134782086  | 46  | DDX46    |
| chr12:31451939-31460381   | 14  | DENND5B  |
| chr4:2596083-2631169      | 11  | FAM193A  |
| chr5:108798123-108798389  | 160 | FER      |
| chr5:74758848-74763766    | 9   | GFM2     |
| chr12:112203635-112204623 | 24  | HECTD4   |
| chr15:99671322-99690428   | 11  | MEF2A    |
| chr11:2976023-2979237     | 21  | NAP1L4   |
| chr10:92012328-92012686   | 10  | nogene   |
| chr16:2557702-2566453     | 204 | PDPK1    |
| chr16:14997752-15004333   | 12  | PDXDC1   |
| chr17:45120324-45121372   | 5   | PLCD3    |
| chr1:174220971-174305127  | 10  | RABGAP1L |
| chr11:110263959-110264874 | 209 | RDX      |
| chr1:154965542-154966517  | 8   | SHC1     |
| chr15:50586391-50592626   | 36  | TRPM7    |
| chr1:22489879-22491533    | 135 | ZBTB40   |
| chr12:125114476-125118765 | 4   | AACS     |
| chr1:243613670-243637742  | 142 | AKT3     |
| chr5:126577078-126593404  | 26  | ALDH7A1  |
| chr19:32644324-32646615   | 9   | ANKRD27  |
| chr6:138333969-138335188  | 10  | ARFGEF3  |
| chr11:129093620-129164427 | 83  | ARHGAP32 |
| chr8:130214555-130236994  | 126 | ASAP1    |
| chr12:53531743-53537552   | 4   | ATF7     |
| chr5:71548681-71549606    | 15  | BDP1     |
| chr17:61715950-61744591   | 5   | BRIP1    |
| chr15:40196544-40202694   | 6   | BUB1B    |
| chr11:93747296-93759858   | 51  | C11orf54 |
| chr5:37170040-37175986    | 8   | C5orf42  |
| chr20:33606955-33611335   | 11  | CBFA2T2  |
| chr6:47595860-47606277    | 11  | CD2AP    |
| chrX:101101057-101109998  | 285 | CENPI    |
| chr20:35479230-35480145   | 20  | CEP250   |
| chr15:92953356-92967513   | 8   | CHD2     |

|                           |     |              |
|---------------------------|-----|--------------|
| chr16:58582792-58583182   | 60  | CNOT1        |
| chr9:17298189-17342444    | 36  | CNTLN        |
| chr16:58174450-58196844   | 4   | CSNK2A2      |
| chr1:113906995-113908191  | 8   | DCLRE1B      |
| chr11:118758773-118760044 | 24  | DDX6         |
| chr9:33029884-33030667    | 13  | DNAJA1       |
| chr17:82064254-82064822   | 4   | DUS1L        |
| chr10:73160433-73163950   | 6   | ECD          |
| chr5:50402285-50428227    | 4   | EMB          |
| chr5:464289-465845        | 10  | EXOC3        |
| chr6:70475409-70502791    | 10  | FAM135A      |
| chr10:73177845-73193593   | 9   | FAM149B1     |
| chr1:27732602-27734183    | 12  | FAM76A       |
| chr2:169530586-169544835  | 41  | FASTKD1      |
| chr15:75913202-75917394   | 10  | FBXO22       |
| chr16:70463168-70463774   | 106 | FUK          |
| chr5:151790322-151795575  | 33  | G3BP1        |
| chr5:162142163-162153372  | 12  | GABRG2       |
| chr17:36554819-36560871   | 17  | GGNBP2       |
| chr6:104744159-104785319  | 28  | HACE1        |
| chr2:37037854-37041292    | 9   | HEATR5B      |
| chr14:31133237-31133675   | 94  | HECTD1       |
| chr20:43635925-43642624   | 6   | IFT52        |
| chr6:149623102-149632916  | 11  | KATNA1       |
| chr5:141933258-141934586  | 11  | KIAA0141     |
| chr20:16494290-16515664   | 123 | KIF16B       |
| chr7:130116444-130122202  | 26  | KLHDC10      |
| chr18:6301902-6312056     | 351 | L3MBTL4      |
| chr6:108355653-108366332  | 15  | LACE1        |
| chr16:72349066-72391215   | 6   | LINC01572    |
| chr16:72522552-72555326   | 27  | LINC01572    |
| chr1:93324634-93340510    | 17  | LOC100131564 |
| chr9:85822879-85829606    | 27  | LOC389765    |
| chr1:113093205-113094755  | 9   | LRIG2        |
| chr5:56864733-56865977    | 37  | MAP3K1       |
| chr2:159729008-159762993  | 13  | 7-Mar        |
| chr12:68816811-68828931   | 20  | MDM2         |
| chr15:99598429-99633173   | 6   | MEF2A        |
| chr9:36597221-36643083    | 122 | MELK         |
| chr9:130219724-130223159  | 8   | NCS1         |
| chr2:206132944-206142069  | 13  | NDUFS1       |
| chr10:15112795-15119513   | 8   | NMT2         |
| chr6:129556551-129558166  | 16  | nogene       |

|                           |     |           |
|---------------------------|-----|-----------|
| chr6:77072298-77151974    | 7   | nogene    |
| chr11:65435052-65437657   | 46  | nogene    |
| chr17:4888123-4888792     | 18  | nogene    |
| chr1:31045409-31045843    | 13  | nogene    |
| chr17:82403936-82406482   | 20  | OGFOD3    |
| chr1:233090060-233179175  | 4   | PCNXL2    |
| chr16:71676446-71714801   | 8   | PHLPP2    |
| chr20:34634614-34645334   | 12  | PIGU      |
| chr11:68505144-68545024   | 11  | PPP6R3    |
| chr3:48782985-48807684    | 14  | PRKAR2A   |
| chr2:20318536-20327378    | 3   | PUM2      |
| chr5:160089505-160094065  | 21  | PWWP2A    |
| chr2:1687631-1693134      | 9   | PXDN      |
| chr11:32966299-32973549   | 11  | QSER1     |
| chr10:118038971-118040565 | 19  | RAB11FIP2 |
| chr15:55223888-55270284   | 11  | RAB27A    |
| chr3:141572608-141577106  | 3   | RASA2     |
| chr16:74626342-74636577   | 11  | RFWD3     |
| chr2:226864603-226867318  | 164 | RHBDD1    |
| chr5:179966805-179980200  | 24  | RNF130    |
| chr11:10519033-10534205   | 10  | RNF141    |
| chr7:5715052-5725438      | 18  | RNF216    |
| chr1:213061381-213077816  | 9   | RPS6KC1   |
| chr5:78388836-78421960    | 47  | SCAMP1    |
| chr1:41046406-41075451    | 9   | SCMH1     |
| chr16:70565064-70567536   | 40  | SF3B3     |
| chr15:75422646-75430408   | 10  | SIN3A     |
| chr5:55343330-55358698    | 8   | SKIV2L2   |
| chr2:171826797-171844508  | 8   | SLC25A12  |
| chr1:27113825-27114286    | 9   | SLC9A1    |
| chr12:49460769-49461037   | 11  | SPATS2    |
| chr9:128612246-128613346  | 20  | SPTAN1    |
| chr4:56478378-56483270    | 53  | SRP72     |
| chr1:27789561-27793632    | 18  | STX12     |
| chr9:112149243-112157613  | 53  | SUSD1     |
| chr4:26613168-26640187    | 48  | TBC1D19   |
| chr15:66349059-66349437   | 33  | TIPIN     |
| chr13:113510237-113520733 | 41  | TMCO3     |
| chrX:110046356-110109146  | 8   | TMEM164   |
| chr2:229774096-229777479  | 5   | TRIP12    |
| chr7:67183125-67195337    | 18  | TYW1      |
| chr9:34234215-34242108    | 12  | UBAP1     |
| chr3:196362293-196369511  | 33  | UBXN7     |



|                           |     |            |
|---------------------------|-----|------------|
| chr1:165890203-165896332  | 110 | UCK2       |
| chr9:77214328-77227485    | 74  | VPS13A     |
| chr16:46674313-46677398   | 341 | VPS35      |
| chr10:1077906-1105267     | 7   | WDR37      |
| chr12:64418045-64419094   | 9   | XPOT       |
| chr16:88586599-88611536   | 9   | ZC3H18     |
| chr8:134583831-134590355  | 15  | ZFAT       |
| chr1:35381258-35390098    | 18  | ZMYM4      |
| chr10:91994534-92008275   | 122 | BTAF1      |
| chr20:35655201-35658982   | 35  | CPNE1      |
| chr12:53018797-53019006   | 20  | EIF4B      |
| chr4:40978403-41014398    | 5   | APBB2      |
| chr9:92634385-92635308    | 5   | IPPK       |
| chr5:41731633-41739491    | 14  | OXCT1      |
| chr11:2347545-2347796     | 10  | nogene     |
| chr17:30785918-30796337   | 14  | CRLF3      |
| chr2:61010655-61011905    | 12  | PUS10      |
| chr1:176135009-176176007  | 38  | RFWD2      |
| chr2:203391045-203402734  | 25  | ABI2       |
| chr5:65291328-65334085    | 36  | ADAMTS6    |
| chr5:65931179-65994864    | 7   | ERBB2IP    |
| chr1:41186120-41194399    | 45  | SCMH1      |
| chr16:2937384-2938162     | 7   | FLYWCH1    |
| chr5:65329377-65473952    | 53  | ADAMTS6    |
| chr19:37759046-37771696   | 4   | ZNF573     |
| chr16:66469601-66469865   | 4   | BEAN1      |
| chr10:86912239-86919469   | 8   | BMPR1A     |
| chr10:101990550-102040125 | 4   | C10orf76   |
| chr9:2807813-2812362      | 4   | KIAA0020   |
| chr7:86938125-86947922    | 17  | KIAA1324L  |
| chr20:25496662-25498346   | 4   | NINL       |
| chr13:28174271-28220378   | 63  | PAN3       |
| chr8:140789473-140830526  | 127 | PTK2       |
| chr2:135675331-135680324  | 130 | R3HDM1     |
| chr1:176162868-176176007  | 87  | RFWD2      |
| chr7:92319329-92327900    | 26  | ANKIB1     |
| chr15:40602914-40611511   | 70  | CASC5      |
| chr15:39713443-39741900   | 15  | FSIP1      |
| chr3:155910691-155914570  | 36  | GMPS       |
| chr1:233353806-233362293  | 18  | KIAA1804   |
| chr12:12130782-12147556   | 8   | LRP6       |
| chr9:137039970-137040436  | 3   | NPDC1      |
| chr7:154946359-154948090  | 9   | PAXIP1-AS2 |

|                           |     |           |
|---------------------------|-----|-----------|
| chr2:135638738-135639122  | 3   | R3HDM1    |
| chr4:106295093-106308989  | 78  | TBCK      |
| chr14:93214928-93218735   | 3   | UBR7      |
| chr1:935771-939460        | 19  | SAMD11    |
| chr2:135090997-135115381  | 11  | RAB3GAP1  |
| chr8:103910320-103961133  | 8   | RIMS2     |
| chr21:39236594-39238573   | 15  | BRWD1     |
| chr5:179707131-179710065  | 32  | CANX      |
| chr6:43056080-43056445    | 4   | MRPL2     |
| chr16:1314019-1320517     | 33  | UBE2I     |
| chr7:93308823-93334197    | 14  | VPS50     |
| chr7:55492281-55497690    | 10  | VOPP1     |
| chr12:132741418-132755133 | 5   | ANKLE2    |
| chr11:118583808-118584644 | 32  | ARCN1     |
| chr1:155395458-155404350  | 10  | ASH1L     |
| chr6:83924469-83936376    | 7   | CYB5R4    |
| chr1:20969473-20981227    | 123 | EIF4G3    |
| chr5:112275325-112307490  | 17  | EPB41L4A  |
| chrX:63509943-63517082    | 52  | LINC01278 |
| chr3:197830769-197832317  | 4   | LRCH3     |
| chr17:62033786-62035608   | 80  | MED13     |
| chr9:36589535-36607673    | 17  | MELK      |
| chr2:219792376-219794170  | 42  | nogene    |
| chr13:28174271-28256539   | 11  | PAN3      |
| chr2:60781884-60783209    | 5   | PAPOLG    |
| chr7:10990702-11022979    | 30  | PHF14     |
| chr14:73147794-73186920   | 26  | PSEN1     |
| chr9:136823524-136832370  | 8   | RABL6     |
| chr2:37974039-38004216    | 16  | RMDN2     |
| chr3:47662333-47686170    | 7   | SMARCC1   |
| chr22:29511105-29519120   | 7   | THOC5     |
| chr12:101333300-101334504 | 31  | UTP20     |
| chr16:28125688-28132403   | 16  | XPO6      |
| chr1:155676547-155679512  | 249 | YY1AP1    |
| chr9:20819795-20867012    | 11  | FOCAD     |
| chr18:41481881-41501276   | 8   | KC6       |
| chr5:69285336-69303929    | 7   | CCDC125   |
| chr3:47179427-47179683    | 13  | nogene    |
| chr1:28553639-28571900    | 4   | TRNAU1AP  |
| chr3:81577924-81581275    | 14  | GBE1      |
| chr19:32625873-32643631   | 11  | ANKRD27   |
| chr11:78119181-78127436   | 50  | ALG8      |
| chr5:108782662-108798389  | 14  | FER       |

|                           |     |           |
|---------------------------|-----|-----------|
| chr10:101798841-101800400 | 29  | MGEA5     |
| chr15:70656929-70664814   | 14  | UACA      |
| chr11:93747301-93757465   | 6   | C11orf54  |
| chr10:68787926-68788328   | 21  | CCAR1     |
| chr10:68913161-68914204   | 39  | DDX50     |
| chr1:50787999-50857997    | 38  | FAF1      |
| chr5:150010110-150012353  | 8   | HMGXB3    |
| chr12:42373392-42398994   | 13  | PPHLN1    |
| chr3:195289120-195320813  | 5   | ACAP2     |
| chr2:222918045-222924595  | 23  | ACSL3     |
| chr5:140472238-140487060  | 7   | ANKHD1    |
| chr1:70300763-70315566    | 51  | ANKRD13C  |
| chr8:130159863-130187285  | 38  | ASAP1     |
| chr3:11340644-11426926    | 5   | ATG7      |
| chr21:41914597-41922085   | 70  | C2CD2     |
| chr9:71918424-71947112    | 15  | C9orf85   |
| chr1:223759269-223772239  | 30  | CAPN2     |
| chr10:35516522-35553185   | 49  | CCNY      |
| chr22:28694031-28696987   | 7   | CHEK2     |
| chr5:157791702-157794972  | 6   | CLINT1    |
| chr12:122352725-122380558 | 33  | CLIP1     |
| chr15:90619740-90625993   | 12  | CRTC3     |
| chr15:65752378-65756472   | 11  | DENND4A   |
| chr5:141580743-141583615  | 42  | DIAPH1    |
| chr19:2189731-2194577     | 47  | DOT1L     |
| chr16:67192760-67197646   | 8   | E2F4      |
| chr5:148394713-148417204  | 11  | FBXO38    |
| chr5:109037421-109047198  | 61  | FER       |
| chr9:19086733-19089559    | 20  | HAUS6     |
| chr15:72350517-72356617   | 8   | HEXA      |
| chr4:3154292-3157199      | 14  | HTT       |
| chr6:82214230-82214829    | 4   | IBTK      |
| chr7:128641237-128648982  | 17  | LINC01000 |
| chr3:183323234-183389779  | 12  | MCF2L2    |
| chr11:28296796-28362036   | 12  | METTL15   |
| chr14:21503172-21508235   | 9   | METTL3    |
| chr18:36195256-36220217   | 31  | MOCOS     |
| chr11:78559538-78571444   | 114 | NARS2     |
| chr5:36953617-36976402    | 124 | NIPBL     |
| chr5:65777426-65792655    | 14  | NLN       |
| chr19:47478500-47479152   | 8   | nogene    |
| chr7:32812756-32833164    | 10  | nogene    |
| chr19:36078358-36078607   | 6   | nogene    |

|                           |     |            |
|---------------------------|-----|------------|
| chr5:93553760-93563463    | 63  | NR2F1-AS1  |
| chr10:18585948-18596327   | 9   | NSUN6      |
| chr7:92517275-92518255    | 29  | PEX1       |
| chr8:47927193-47930012    | 61  | PRKDC      |
| chr2:119900717-119934958  | 7   | PTPN4      |
| chr1:31005852-31007099    | 30  | PUM1       |
| chr1:174250474-174394145  | 9   | RABGAP1L   |
| chr12:925449-933076       | 19  | RAD52      |
| chr12:916343-916820       | 6   | RAD52      |
| chr20:34072065-34077245   | 228 | RALY       |
| chr20:37065423-37067297   | 16  | RBL1       |
| chr9:3395471-3420870      | 8   | RFX3       |
| chr15:76753807-76775117   | 15  | SCAPER     |
| chr14:30705822-30722559   | 16  | SCFD1      |
| chr14:30633946-30643405   | 34  | SCFD1      |
| chr4:75964134-75982037    | 50  | SDAD1      |
| chr10:119909040-119915889 | 12  | SEC23IP    |
| chr12:48071666-48074793   | 32  | SENP1      |
| chr3:47720665-47745993    | 119 | SMARCC1    |
| chr2:17731740-17745951    | 6   | SMC6       |
| chr15:64118116-64123546   | 96  | SNX1       |
| chr7:105203627-105206529  | 4   | SRPK2      |
| chr1:28605371-28622165    | 40  | TAF12      |
| chr18:26315228-26335231   | 62  | TAF4B      |
| chr14:20384984-20386195   | 4   | TEP1       |
| chrX:155524455-155545277  | 10  | TMLHE      |
| chr8:142330900-142345892  | 59  | TSNARE1    |
| chr17:60265411-60294801   | 40  | USP32      |
| chr4:84829003-84897010    | 4   | WDFY3      |
| chr10:1080010-1096246     | 21  | WDR37      |
| chr18:56717963-56781656   | 14  | WDR7       |
| chr9:86310705-86319670    | 4   | ZCCHC6     |
| chr9:37126311-37147445    | 23  | ZCCHC7     |
| chr20:25634728-25688835   | 8   | ZNF337-AS1 |
| chr5:37348504-37358151    | 19  | NUP155     |
| chr5:65567512-65572286    | 153 | PPWD1      |
| chr1:150334934-150335241  | 26  | PRPF3      |
| chr1:155709772-155717128  | 4   | DAP3       |
| chr1:59339957-59346398    | 79  | FGGY       |
| chr2:61284874-61295290    | 34  | USP34      |
| chr7:8003907-8060248      | 109 | GLCCI1     |
| chr17:29482196-29491865   | 12  | TAOK1      |
| chr11:46811006-46816404   | 6   | CKAP5      |

|                           |      |           |
|---------------------------|------|-----------|
| chr17:60377093-60380399   | 18   | nogene    |
| chr20:32366383-32369123   | 2827 | ASXL1     |
| chr1:169978084-170031975  | 30   | KIFAP3    |
| chr2:31942720-31943383    | 12   | MEMO1     |
| chr11:3719411-3753408     | 9    | NUP98     |
| chr20:48974765-48976199   | 39   | ARFGEF2   |
| chr7:99388038-99390012    | 49   | ARPC1B    |
| chr1:93567278-93571841    | 14   | BCAR3     |
| chr7:6591645-6602140      | 9    | C7orf26   |
| chr1:64629354-64641969    | 8    | CACHD1    |
| chr3:14654425-14658929    | 6    | CCDC174   |
| chr17:66027500-66030023   | 14   | CEP112    |
| chr1:47368468-47375293    | 104  | CMPK1     |
| chr4:83056925-83068522    | 7    | COPS4     |
| chr14:69122216-69149503   | 76   | DCAF5     |
| chr9:123667025-123879021  | 26   | DENND1A   |
| chr1:225152004-225185425  | 65   | DNAH14    |
| chr1:15534236-15548428    | 39   | DNAJC16   |
| chr6:56578813-56600221    | 8    | DST       |
| chr7:6037423-6039035      | 13   | EIF2AK1   |
| chr10:119072889-119073937 | 130  | EIF3A     |
| chr1:21001198-21111383    | 27   | EIF4G3    |
| chr17:76094413-76101863   | 12   | EXOC7     |
| chrX:131793993-131794466  | 10   | FIRRE     |
| chr14:65561336-65629606   | 28   | FUT8      |
| chr1:28683582-28704329    | 6    | GMEB1     |
| chr16:58722149-58723902   | 47   | GOT2      |
| chrX:84321841-84344457    | 11   | HDX       |
| chr5:74715509-74716673    | 67   | HEXB      |
| chr1:20757165-20779911    | 18   | HP1BP3    |
| chr21:33246717-33248854   | 8    | IFNAR2    |
| chr12:30649136-30666251   | 7    | IPO8      |
| chr20:34470047-34481206   | 190  | ITCH      |
| chr8:125049005-125050665  | 21   | KIAA0196  |
| chrX:70296997-70302398    | 25   | KIF4A     |
| chr4:87170078-87176868    | 4    | KLHL8     |
| chr1:187321809-187329060  | 5    | LINC01036 |
| chr11:68403482-68406813   | 7    | LRP5      |
| chr12:68828770-68839801   | 12   | MDM2      |
| chr18:21765771-21768752   | 25   | MIB1      |
| chr7:24620051-24641868    | 15   | MPP6      |
| chr1:167772274-167788019  | 63   | MPZL1     |
| chr2:42707902-42709096    | 8    | MTA3      |

|                           |    |           |
|---------------------------|----|-----------|
| chr8:70123883-70124865    | 8  | NCOA2     |
| chr16:68157868-68167015   | 24 | NFATC3    |
| chr19:3381711-3382243     | 59 | NFIC      |
| chr1:40747533-40753246    | 10 | NFYC      |
| chr1:169287302-169298763  | 13 | NME7      |
| chr7:135504930-135505293  | 9  | nogene    |
| chr2:131483963-131486181  | 10 | nogene    |
| chr22:28514756-28519320   | 93 | nogene    |
| chr12:11121009-11129363   | 9  | nogene    |
| chr7:5528571-5529201      | 9  | nogene    |
| chr1:51748368-51765981    | 12 | OSBPL9    |
| chr3:52668497-52679726    | 4  | PBRM1     |
| chr15:85123060-85126374   | 9  | PDE8A     |
| chr3:123089167-123124343  | 7  | PDIA5     |
| chr2:189791789-189818829  | 10 | PMS1      |
| chr9:122957010-122979040  | 4  | RABGAP1   |
| chr1:176135009-176149074  | 37 | RFWD2     |
| chr15:76567269-76574284   | 12 | SCAPER    |
| chr18:12951854-12955609   | 9  | SEH1L     |
| chr1:100911062-100921841  | 24 | SLC30A7   |
| chr15:75609557-75621056   | 6  | SNUPN     |
| chr8:47279269-47440542    | 9  | SPIDR     |
| chr5:179822957-179824323  | 19 | SQSTM1    |
| chr12:118400658-118414470 | 8  | SUDS3     |
| chr1:85190056-85190752    | 29 | SYDE2     |
| chr7:116249019-116252476  | 9  | TES       |
| chr9:69236027-69237136    | 8  | TJP2      |
| chr6:158580939-158585425  | 5  | TMEM181   |
| chr9:120923704-120926688  | 7  | TRAF1     |
| chr9:132921362-132935095  | 6  | TSC1      |
| chr9:135945027-135947905  | 5  | UBAC1     |
| chr2:23958300-23984831    | 49 | UBXN2A    |
| chr2:28912589-28914208    | 13 | WDR43     |
| chr16:28166507-28181031   | 7  | XPO6      |
| chr16:87417459-87418901   | 6  | ZCCHC14   |
| chr10:87151349-87152879   | 10 | FAM35A    |
| chr20:50903888-50928825   | 8  | ADNP      |
| chr6:100589633-100607088  | 4  | ASCC3     |
| chrX:77663381-77664778    | 43 | ATRX      |
| chr20:5700744-5773043     | 11 | C20orf196 |
| chr1:100424221-100442996  | 42 | CDC14A    |
| chr9:120408346-120409316  | 4  | CDK5RAP2  |
| chr2:211619176-211630594  | 23 | ERBB4     |

|                           |     |           |
|---------------------------|-----|-----------|
| chr10:68337198-68339555   | 8   | HNRNPH3   |
| chr3:185672540-185675913  | 9   | IGF2BP2   |
| chr10:124496960-124517271 | 18  | LHPP      |
| chr12:8390269-8397120     | 4   | LINC00937 |
| chrX:3817544-3818703      | 43  | LOC389906 |
| chr11:122116132-122180398 | 13  | MIR100HG  |
| chr4:139349461-139354098  | 10  | NAA15     |
| chr3:196270414-196283538  | 83  | PCYT1A    |
| chr4:120811369-120821345  | 57  | PRDM5     |
| chr15:78544189-78546698   | 11  | PSMA4     |
| chr14:30649527-30675065   | 20  | SCFD1     |
| chr22:31580271-31602785   | 12  | SFI1      |
| chr3:27437387-27452498    | 12  | SLC4A7    |
| chr16:68859883-68909402   | 9   | TANGO6    |
| chr2:241601895-241606473  | 107 | THAP4     |
| chr7:23505745-23522432    | 12  | TRA2A     |
| chr2:84832054-84842007    | 8   | TRABD2A   |
| chr19:34450264-34467014   | 53  | UBA2      |
| chr11:11880176-11897693   | 8   | USP47     |
| chr4:201080-212781        | 16  | ZNF718    |
| chr11:123594081-123594838 | 4   | GRAMD1B   |
| chr21:31958842-31983609   | 3   | HUNK      |
| chrX:21878041-21878692    | 15  | MBTPS2    |
| chr6:87603383-87606021    | 3   | ORC3      |
| chr3:138742557-138755895  | 3   | PIK3CB    |
| chr2:119932423-119952129  | 3   | PTPN4     |
| chr1:147255812-147268878  | 5   | CHD1L     |
| chr5:138810037-138827718  | 39  | CTNNA1    |
| chr10:100256261-100262063 | 18  | CWF19L1   |
| chr12:50692948-50697175   | 5   | DIP2B     |
| chrX:24064200-24071727    | 27  | EIF2S3    |
| chr12:11839139-11869969   | 9   | ETV6      |
| chr9:111417882-111433372  | 8   | KIAA0368  |
| chr8:94537102-94543942    | 8   | KIAA1429  |
| chr12:51053811-51056502   | 6   | LETMD1    |
| chr3:151156160-151165982  | 8   | MED12L    |
| chr1:178737107-178741609  | 7   | nogene    |
| chrX:81324575-81328708    | 4   | nogene    |
| chr2:40160764-40177855    | 68  | SLC8A1    |
| chr10:31355143-31461237   | 12  | ZEB1      |
| chr9:65682765-65693473    | 210 | CBWD5     |
| chr1:108657450-108659962  | 24  | HENMT1    |
| chr17:72841757-72849804   | 29  | SLC39A11  |

|                           |     |          |
|---------------------------|-----|----------|
| chr2:241456746-241475987  | 10  | FARP2    |
| chr6:24538935-24539680    | 5   | nogene   |
| chr11:75961443-75983513   | 18  | UVRAG    |
| chr5:154865191-154872651  | 58  | CNOT8    |
| chr4:88906378-88938241    | 11  | FAM13A   |
| chr10:6213622-6217191     | 11  | PFKFB3   |
| chr2:199348700-199433514  | 33  | SATB2    |
| chr8:99442400-99521010    | 6   | VPS13B   |
| chr16:16009775-16016621   | 10  | ABCC1    |
| chr8:130152735-130187285  | 30  | ASAP1    |
| chr19:41248513-41248948   | 11  | AXL      |
| chr2:44372715-44505730    | 3   | CAMKMT   |
| chr4:109659010-109664394  | 91  | CCDC109B |
| chr1:37695909-37703347    | 9   | CDCA8    |
| chr19:32899856-32901412   | 73  | CEP89    |
| chr22:28703504-28725367   | 3   | CHEK2    |
| chr4:55453053-55456300    | 40  | CLOCK    |
| chr2:171448680-171458477  | 10  | DCAF17   |
| chr4:51863436-51891851    | 637 | DCUN1D4  |
| chr1:225079206-225097239  | 46  | DNAH14   |
| chr3:172786492-172807924  | 21  | ECT2     |
| chr10:15248638-15254879   | 7   | FAM171A1 |
| chr7:208897-209384        | 9   | FAM20C   |
| chr1:77783237-77843407    | 17  | FAM73A   |
| chr12:116945363-116949706 | 37  | FBXW8    |
| chr9:20885108-20916937    | 11  | FOCAD    |
| chr12:110455585-110457634 | 72  | GPN3     |
| chr19:35019190-35019533   | 9   | GRAMD1A  |
| chr7:65974294-65980409    | 11  | GUSB     |
| chr10:68014025-68073686   | 30  | HERC4    |
| chr12:68302619-68302872   | 25  | MDM1     |
| chr13:23836239-23870195   | 33  | MIPEP    |
| chr8:120459214-120488332  | 14  | MTBP     |
| chr8:97686667-97689103    | 25  | MTDH     |
| chr10:31373017-31387266   | 413 | nogene   |
| chr14:35002261-35002527   | 21  | nogene   |
| chr14:45096423-45096758   | 5   | nogene   |
| chrX:65366637-65398704    | 3   | nogene   |
| chr17:81604547-81608822   | 75  | NPLOC4   |
| chr10:13108961-13109288   | 6   | OPTN     |
| chr6:79015081-79060818    | 6   | PHIP     |
| chr1:3186124-3244137      | 6   | PRDM16   |
| chr6:57532410-57537625    | 146 | PRIM2    |



|                           |     |              |
|---------------------------|-----|--------------|
| chr6:128304667-128322310  | 10  | PTPRK        |
| chr14:30702295-30715977   | 9   | SCFD1        |
| chr4:128992166-129044051  | 9   | SCLT1        |
| chr6:75622750-75634811    | 15  | SENP6        |
| chr7:94598774-94629841    | 17  | SGCE         |
| chr3:47720665-47736126    | 8   | SMARCC1      |
| chr16:18849216-18850467   | 40  | SMG1         |
| chr19:16647095-16654125   | 14  | SMIM7        |
| chr16:69245601-69270285   | 43  | SNTB2        |
| chr2:181921947-181928278  | 35  | SSFA2        |
| chr17:31940285-31976614   | 59  | SUZ12        |
| chr17:4282797-4289408     | 18  | UBE2G1       |
| chr1:7777159-7778169      | 930 | VAMP3        |
| chr19:52314152-52315962   | 8   | ZNF480       |
| chrX:63665885-63678572    | 18  | ARHGEF9      |
| chr7:22961234-22991139    | 12  | FAM126A      |
| chr3:58145920-58150227    | 4   | FLNB         |
| chr8:43059091-43077364    | 33  | FNTA         |
| chr1:230236013-230249271  | 4   | GALNT2       |
| chr14:22947170-22950410   | 23  | HAUS4        |
| chr8:135542653-135607037  | 4   | KHDRBS3      |
| chr22:36285356-36285657   | 4   | MYH9         |
| chr13:41316845-41336756   | 18  | NAA16        |
| chr5:154823198-154824092  | 10  | nogene       |
| chr2:45840379-45860198    | 26  | nogene       |
| chr19:56378604-56379370   | 4   | nogene       |
| chr17:81909055-81909513   | 4   | PCYT2        |
| chr14:77296163-77306441   | 16  | POMT2        |
| chr1:51933317-51977117    | 4   | RAB3B        |
| chr12:121416158-121423517 | 9   | RNF34        |
| chr6:42603587-42612291    | 128 | UBR2         |
| chr1:21748137-21751615    | 26  | USP48        |
| chrX:118398386-118404444  | 10  | WDR44        |
| chr5:69252417-69262304    | 42  | CDK7         |
| chr16:66622061-66623502   | 5   | CMTM4        |
| chr1:92736397-92738040    | 6   | EVI5         |
| chr18:13681604-13682105   | 352 | FAM210A      |
| chr3:172112451-172251541  | 18  | FNDC3B       |
| chr17:81693653-81694853   | 178 | HGS          |
| chr20:34470047-34492597   | 109 | ITCH         |
| chr15:30658765-30750556   | 11  | LOC100288637 |
| chr5:80725452-80761678    | 34  | MSH3         |
| chr1:51823663-51834170    | 103 | NRD1         |

|                           |    |                 |
|---------------------------|----|-----------------|
| chr7:6002452-6004058      | 12 | PMS2            |
| chr8:140874462-140890769  | 12 | PTK2            |
| chr7:105459167-105470848  | 10 | PUS7            |
| chr14:39074414-39087008   | 7  | SEC23A          |
| chr6:158583953-158608750  | 15 | TMEM181         |
| chr3:126621741-126647296  | 53 | TXNRD3          |
| chr2:71355718-71370005    | 50 | ZNF638          |
| chr10:73571420-73576361   | 47 | USP54           |
| chr14:51689690-51715499   | 20 | FRMD6           |
| chr4:150735257-150848998  | 7  | LRBA            |
| chr12:69251128-69253154   | 21 | CPSF6           |
| chr18:21536041-21568094   | 77 | ESCO1           |
| chr6:1726415-1742586      | 29 | GMDS            |
| chr2:239176412-239352918  | 13 | HDAC4           |
| chr3:124841382-124873531  | 11 | ITGB5           |
| chr1:36170970-36171581    | 10 | MAP7D1          |
| chr11:73844806-73860009   | 4  | MRPL48          |
| chr11:64197270-64197974   | 40 | STIP1           |
| chr6:158028755-158043399  | 8  | SYNJ2           |
| chr2:61259710-61266167    | 9  | USP34           |
| chr2:62222211-62225414    | 24 | B3GNT2          |
| chr4:83581561-83590292    | 9  | GPAT3           |
| chr11:19832483-19880127   | 39 | NAV2            |
| chr22:29654656-29665064   | 7  | NF2             |
| chr4:139043073-139048147  | 9  | NOCT            |
| chr7:24816609-24849176    | 61 | OSBPL3          |
| chr15:82404611-82408367   | 20 | UBE2Q2P2        |
| chrX:155898111-155919880  | 9  | VAMP7           |
| chr1:6222395-6223195      | 8  | nogene          |
| chr4:82878729-82880922    | 36 | SEC31A          |
| chr5:31464235-31472232    | 24 | DROSHA          |
| chr1:77801330-77864028    | 12 | FAM73A          |
| chr15:70980100-70984257   | 27 | LRRC49          |
| chr2:190670325-190673152  | 10 | NAB1            |
| chr9:137265876-137267346  | 17 | NELFB           |
| chrX:131344812-131364926  | 30 | nogene          |
| chr22:41636112-41637791   | 21 | XRCC6           |
| chr15:90947795-90948794   | 11 | UNC45A          |
| chr21:39258486-39274472   | 11 | BRWD1           |
| chr3:49368427-49375591    | 17 | RHOA            |
| chr5:140438502-140445975  | 10 | ANKHD1-EIF4EBP3 |
| chr12:110012004-110019328 | 18 | ANKRD13A        |
| chrX:23856301-23874457    | 4  | APOO            |

|                           |     |           |
|---------------------------|-----|-----------|
| chr11:72709869-72714321   | 29  | ARAP1     |
| chr10:24629995-24635103   | 37  | ARHGAP21  |
| chr6:100766564-100767345  | 37  | ASCC3     |
| chr14:34800223-34802988   | 11  | BAZ1A     |
| chr22:49794033-49804360   | 5   | BRD1      |
| chr11:66828265-66828943   | 15  | C11orf80  |
| chr6:17462995-17507726    | 19  | CAP2      |
| chr11:47483452-47484523   | 38  | CELF1     |
| chr5:98868494-98872555    | 24  | CHD1      |
| chr7:101916114-102115273  | 15  | CUX1      |
| chr10:68936935-68941194   | 17  | DDX50     |
| chrX:2243022-2291603      | 5   | DHR SX    |
| chr10:440870-486530       | 16  | DIP2C     |
| chr8:108449822-108450492  | 19  | EMC2      |
| chr12:1110191-1116033     | 27  | ERC1      |
| chr16:53810139-53934109   | 8   | FTO       |
| chr4:75655065-75662049    | 27  | G3BP2     |
| chr9:127291167-127325095  | 6   | GARNL3    |
| chr10:130145210-130175089 | 5   | GLRX3     |
| chr14:76171842-76176690   | 21  | GPATCH2L  |
| chr7:18644670-18666476    | 10  | HDAC9     |
| chr6:15246380-15374252    | 11  | JARID2    |
| chr6:72647931-72677214    | 9   | KCNQ5-IT1 |
| chr12:50454313-50467120   | 10  | LARP4     |
| chr12:12148941-12151038   | 8   | LRP6      |
| chr2:159743060-159745937  | 7   | 7-Mar     |
| chr5:69419370-69424636    | 53  | MARVELD2  |
| chr2:15461200-15558634    | 5   | NBAS      |
| chr12:6509716-6511252     | 87  | NCAPD2    |
| chr4:177351379-177353728  | 15  | NEIL3     |
| chr16:69656188-69656546   | 10  | nogene    |
| chr17:74989909-74991127   | 5   | nogene    |
| chr1:152248894-152251758  | 32  | nogene    |
| chr4:23103586-23186098    | 17  | nogene    |
| chr9:111009147-111011690  | 30  | nogene    |
| chr1:229450524-229465519  | 7   | NUP133    |
| chr1:228213440-228215098  | 9   | OBSCN     |
| chr17:78414951-78419725   | 4   | PGS1      |
| chr14:49664625-49674427   | 78  | POLE2     |
| chr10:70209204-70209685   | 8   | PPA1      |
| chr8:140761164-140864399  | 10  | PTK2      |
| chr18:36026899-36040865   | 9   | RPRD1A    |
| chr6:75621531-75634811    | 158 | SENP6     |

|                           |     |          |
|---------------------------|-----|----------|
| chr9:132296886-132300803  | 16  | SETX     |
| chr10:100915998-100918441 | 18  | SLF2     |
| chr3:47670657-47678311    | 11  | SMARCC1  |
| chr3:47738028-47772936    | 35  | SMARCC1  |
| chr15:44569397-44572820   | 9   | SPG11    |
| chr9:88426381-88448989    | 11  | SPIN1    |
| chr17:63713405-63714108   | 8   | STRADA   |
| chr10:69198371-69203043   | 10  | SUPV3L1  |
| chr14:69658512-69658713   | 8   | SUSD6    |
| chr8:119801793-119831721  | 55  | TAF2     |
| chr16:68859883-68863061   | 106 | TANGO6   |
| chr10:94474667-94522453   | 12  | TBC1D12  |
| chr3:63834062-63839773    | 17  | THOC7    |
| chr7:130173631-130178527  | 36  | TMEM209  |
| chr7:5345561-5352094      | 24  | TNRC18   |
| chr5:14293011-14336727    | 29  | TRIO     |
| chr2:229829192-229836984  | 38  | TRIP12   |
| chr15:70682757-70699660   | 58  | UACA     |
| chr1:162576776-162601514  | 14  | UAP1     |
| chr9:33960825-33973237    | 246 | UBAP2    |
| chr1:154234590-154246375  | 6   | UBAP2L   |
| chr6:34821652-34823348    | 15  | UHRF1BP1 |
| chr3:41715236-41717861    | 50  | ULK4     |
| chr18:196636-204692       | 122 | USP14    |
| chr10:73505016-73505307   | 4   | USP54    |
| chr2:106122969-106145370  | 19  | UXS1     |
| chr8:99134631-99170163    | 6   | VPS13B   |
| chr1:12415086-12416827    | 10  | VPS13D   |
| chr14:63598755-63599973   | 79  | WDR89    |
| chr1:32806481-32811057    | 9   | YARS     |
| chr6:87210450-87218731    | 347 | ZNF292   |
| chr2:48328516-48346751    | 42  | FOXN2    |
| chr5:79447052-79457018    | 12  | HOMER1   |
| chr20:32825924-32839856   | 15  | MAPRE1   |
| chr5:87372117-87374916    | 12  | RASA1    |
| chr16:29554415-29560215   | 4   | SMG1P2   |
| chr19:34431860-34467014   | 53  | UBA2     |
| chr12:118095532-118095814 | 14  | VSIG10   |
| chr17:58003650-58005041   | 63  | nogene   |
| chr1:246551212-246557534  | 10  | TFB2M    |
| chr20:33619516-33628435   | 81  | CBFA2T2  |
| chr1:235341707-235401587  | 15  | GGPS1    |
| chr1:35841164-35851053    | 8   | AGO4     |

|                           |     |           |
|---------------------------|-----|-----------|
| chr20:51617489-51629072   | 10  | ATP9A     |
| chr15:44328684-44338317   | 24  | CASC4     |
| chr3:123931101-123949132  | 21  | CCDC14    |
| chr12:122777490-122781330 | 74  | CCDC62    |
| chr21:37472683-37496258   | 20  | DYRK1A    |
| chr10:31355143-31387266   | 23  | no gene   |
| chr9:131159382-131164144  | 15  | NUP214    |
| chr11:34947505-34984728   | 19  | PDHX      |
| chr16:2566355-2583585     | 14  | PDPK1     |
| chr5:133980728-133980956  | 24  | VDAC1     |
| chr7:5199575-5222672      | 8   | WIPI2     |
| chr6:36894503-36902434    | 34  | C6orf89   |
| chr1:40064226-40064559    | 69  | CAP1      |
| chr17:81206743-81207239   | 7   | CEP131    |
| chr8:42861744-42874006    | 25  | RNF170    |
| chr19:37643264-37654879   | 7   | ZFP30     |
| chr14:54981539-55000992   | 15  | WDHD1     |
| chr8:23042040-23043243    | 125 | TNFRSF10B |
| chr11:72887469-72902638   | 38  | FCHSD2    |
| chr4:82970326-82984876    | 4   | LIN54     |
| chr7:1957628-2002121      | 28  | MAD1L1    |
| chr19:45258988-45263367   | 13  | MARK4     |
| chr19:38081255-38088851   | 11  | SIPA1L3   |
| chr12:98537474-98547671   | 13  | TMPO      |
| chr5:176975395-176982623  | 192 | UIMC1     |
| chr6:30650993-30651466    | 438 | C6orf136  |
| chr1:225002782-225023865  | 9   | DNAH14    |
| chr14:22947600-22955176   | 15  | HAUS4     |
| chr1:170031885-170055436  | 12  | KIFAP3    |
| chr3:51260155-51271007    | 12  | DOCK3     |
| chr13:77126317-77129230   | 48  | MYCBP2    |
| chr1:235435744-235437474  | 7   | TBCE      |
| chr18:6973056-6980637     | 8   | LAMA1     |
| chr8:140221458-140252929  | 27  | TRAPPC9   |
| chr1:244418759-244432595  | 3   | ADSS      |
| chr12:19493799-19514784   | 4   | AEBP2     |
| chr2:227519947-227524915  | 26  | AGFG1     |
| chr3:105520066-105534845  | 4   | ALCAM     |
| chr10:97246271-97263629   | 27  | ARHGAP19  |
| chr11:129062279-129124894 | 8   | ARHGAP32  |
| chr15:72561482-72572165   | 9   | ARIH1     |
| chr8:61618977-61646878    | 33  | ASPH      |
| chr12:123733925-123737271 | 17  | ATP6V0A2  |

|                          |     |            |
|--------------------------|-----|------------|
| chr1:235465635-235470960 | 17  | B3GALNT2   |
| chr1:235470849-235484515 | 50  | B3GALNT2   |
| chr16:75242469-75243090  | 10  | BCAR1      |
| chr6:80343663-80354354   | 26  | BCKDHB     |
| chr17:67891843-67893725  | 4   | BPTF       |
| chr5:134741062-134744052 | 573 | CAMLG      |
| chr16:2439352-2443800    | 18  | CCNF       |
| chr10:84380097-84438707  | 9   | CCSER2     |
| chr14:80478253-80530886  | 6   | CEP128     |
| chr2:201129728-201133134 | 25  | CFLAR      |
| chr8:96879797-96902096   | 5   | CPQ        |
| chr5:140194445-140194652 | 271 | CYSTM1     |
| chr9:123671290-123879021 | 4   | DENND1A    |
| chr3:197085579-197091026 | 7   | DLG1       |
| chr19:10180349-10182077  | 13  | DNMT1      |
| chr2:25274940-25275543   | 7   | DNMT3A     |
| chr5:31429474-31451640   | 14  | DROSHA     |
| chr20:46393092-46394503  | 41  | ELMO2      |
| chr2:26364301-26375148   | 115 | EPT1       |
| chr18:21560858-21568094  | 21  | ESCO1      |
| chr12:22643762-22673660  | 334 | ETNK1      |
| chr1:27988534-28004419   | 21  | EYA3       |
| chr10:15816834-15847943  | 634 | FAM188A    |
| chr4:158825915-158835476 | 10  | FNIP2      |
| chr6:1930102-1952129     | 6   | GMDS       |
| chr2:53728711-53765585   | 9   | GPR75-ASB3 |
| chr6:134986065-134993875 | 15  | HBS1L      |
| chr7:27629370-27649633   | 237 | HIBADH     |
| chr1:20744743-20773610   | 11  | HP1BP3     |
| chr4:3099273-3107423     | 21  | HTT        |
| chr4:6824184-6842204     | 33  | KIAA0232   |
| chr7:152238706-152250966 | 13  | KMT2C      |
| chr4:82946257-82970469   | 10  | LIN54      |
| chr9:127467739-127473931 | 19  | LRSAM1     |
| chr2:39272282-39288280   | 8   | MAP4K3     |
| chr14:50442731-50448832  | 6   | MAP4K5     |
| chr18:50895808-50908196  | 9   | ME2        |
| chr8:97686667-97706750   | 7   | MTDH       |
| chr10:68201828-68210547  | 8   | MYPN       |
| chr3:161238112-161247330 | 8   | NMD3       |
| chr10:15104936-15112963  | 5   | NMT2       |
| chr7:44481291-44485622   | 33  | nogene     |
| chr7:2720115-2721550     | 6   | nogene     |

|                           |     |          |
|---------------------------|-----|----------|
| chr7:66740156-66745009    | 17  | nogene   |
| chr1:151202999-151203275  | 11  | nogene   |
| chr6:138645754-138646807  | 9   | nogene   |
| chr3:129838897-129880562  | 5   | nogene   |
| chr9:128472912-128473741  | 13  | ODF2     |
| chr8:100709132-100712789  | 7   | PABPC1   |
| chr15:77283882-77286504   | 6   | PEAK1    |
| chr16:47487459-47515601   | 4   | PHKB     |
| chr12:19253939-19265850   | 34  | PLEKHA5  |
| chr22:41583958-41584603   | 78  | PMM1     |
| chr7:75474703-75475188    | 131 | POM121C  |
| chr8:98123335-98128540    | 15  | POP1     |
| chr12:42374862-42375074   | 7   | PPHLN1   |
| chr18:9583116-9584828     | 10  | PPP4R1   |
| chr18:9588088-9595153     | 47  | PPP4R1   |
| chr8:140789473-140819020  | 138 | PTK2     |
| chr8:140800458-140879637  | 28  | PTK2     |
| chr12:121780871-121781192 | 36  | RHOF     |
| chr13:23353784-23375269   | 9   | SACS     |
| chr16:46617633-46618372   | 27  | SHCBP1   |
| chr11:124647364-124648175 | 23  | SIAE     |
| chr10:68493131-68493570   | 5   | SLC25A16 |
| chr1:100913662-100974902  | 9   | SLC30A7  |
| chr1:99993536-100015420   | 21  | SLC35A3  |
| chr3:125453809-125460860  | 6   | SNX4     |
| chr17:28591697-28593066   | 42  | SPAG5    |
| chr17:20245925-20260294   | 170 | SPECC1   |
| chr3:113488944-113499582  | 95  | SPICE1   |
| chr8:47279269-47294030    | 8   | SPIDR    |
| chr3:136443286-136473637  | 9   | STAG1    |
| chr8:73673106-73739866    | 8   | STAU2    |
| chr1:47287550-47295848    | 20  | STIL     |
| chr3:67495797-67529186    | 18  | SUCLG2   |
| chr17:82756164-82800996   | 31  | TBCD     |
| chr17:62552301-62565137   | 106 | TLK2     |
| chr2:97772296-97776018    | 4   | TMEM131  |
| chr9:109080838-109087342  | 39  | TMEM245  |
| chr2:112074911-112086104  | 11  | TMEM87B  |
| chr15:42950261-42970607   | 11  | UBR1     |
| chr1:19192187-19192540    | 31  | UBR4     |
| chr3:41705056-41754488    | 10  | ULK4     |
| chr17:60288522-60301704   | 23  | USP32    |
| chr2:63313247-63439871    | 20  | WDPCP    |

|                           |     |          |
|---------------------------|-----|----------|
| chr22:40868998-40926463   | 7   | XPNPEP3  |
| chr2:61482379-61490776    | 86  | XPO1     |
| chr14:88575839-88578140   | 17  | ZC3H14   |
| chr6:157592987-157595723  | 40  | ZDHHC14  |
| chr10:42631928-42632439   | 4   | ZNF33B   |
| chr19:58260850-58263271   | 16  | ZNF544   |
| chr19:29817136-29817541   | 4   | CCNE1    |
| chr6:87555407-87569590    | 17  | RARS2    |
| chr3:149520830-149527969  | 5   | WWTR1    |
| chr2:232735154-232761436  | 115 | GIGYF2   |
| chr1:247159005-247159813  | 742 | ZNF124   |
| chr8:140864311-140879637  | 36  | PTK2     |
| chrX:153702006-153704094  | 11  | BCAP31   |
| chr1:32228498-32229208    | 25  | EIF3I    |
| chr5:131670462-131679175  | 6   | FNIP1    |
| chr11:20364236-20367281   | 7   | HTATIP2  |
| chr6:161080880-161084617  | 12  | MAP3K4   |
| chr10:48325896-48410168   | 9   | MAPK8    |
| chr12:64062916-64115893   | 13  | SRGAP1   |
| chr12:128800853-128815070 | 8   | SLC15A4  |
| chr10:86912239-86917326   | 27  | BMPR1A   |
| chr9:107300140-107311737  | 602 | RAD23B   |
| chr2:201145377-201160942  | 10  | CFLAR    |
| chr19:10163325-10177367   | 48  | DNMT1    |
| chr17:44110728-44117704   | 23  | HDAC5    |
| chr12:112075677-112081134 | 16  | NAA25    |
| chr5:50750150-50763242    | 108 | PARP8    |
| chr5:150695505-150699271  | 11  | RBM22    |
| chr6:43026036-43027477    | 5   | RRP36    |
| chr7:6135840-6140984      | 9   | USP42    |
| chr1:167966628-167975015  | 295 | DCAF6    |
| chr5:146159406-146164471  | 8   | LARS     |
| chr17:78190969-78192785   | 7   | AFMID    |
| chr12:110016387-110025823 | 7   | ANKRD13A |
| chr10:91942421-91956657   | 8   | BTAF1    |
| chr2:201145377-201164084  | 9   | CFLAR    |
| chr15:82219651-82241403   | 8   | EFTUD1   |
| chr5:108186116-108348530  | 211 | FBXL17   |
| chr9:105615277-105620061  | 5   | FKTN     |
| chr6:34132977-34133859    | 33  | GRM4     |
| chr10:67966682-68038169   | 15  | HERC4    |
| chr3:122752590-122777906  | 21  | HSPBAP1  |
| chr17:61921724-61925099   | 117 | INTS2    |



|                           |     |          |
|---------------------------|-----|----------|
| chr20:34413741-34442303   | 17  | ITCH     |
| chr1:23030468-23040434    | 28  | KDM1A    |
| chr3:183057310-183092545  | 8   | MCCC1    |
| chr21:46264116-46272829   | 4   | MCM3AP   |
| chr5:36207169-36227565    | 13  | NADK2    |
| chr7:66407289-66439304    | 19  | nogene   |
| chr7:85012781-85022613    | 8   | SEMA3D   |
| chr3:14443623-14447816    | 136 | SLC6A6   |
| chr7:117129792-117138532  | 6   | ST7      |
| chr12:98544229-98546447   | 11  | TMPO     |
| chr5:72889785-72893703    | 6   | TNPO1    |
| chr21:44077692-44080127   | 58  | TRAPPC10 |
| chr6:89333085-89343756    | 10  | UBE2J1   |
| chr8:86442618-86452679    | 4   | WWP1     |
| chr7:105268805-105297533  | 7   | SRPK2    |
| chr3:128246835-128264781  | 14  | EEFSEC   |
| chr2:71401955-71418639    | 13  | ZNF638   |
| chr2:127755383-127771004  | 10  | WDR33    |
| chr4:185247293-185323800  | 4   | SNX25    |
| chr17:56847921-56856625   | 14  | DGKE     |
| chr9:137754170-137782397  | 11  | EHMT1    |
| chr15:49235850-49283718   | 61  | GALK2    |
| chr22:23714186-23715194   | 20  | GUSBP11  |
| chrX:70290437-70302398    | 52  | KIF4A    |
| chr12:107699372-107710510 | 15  | PWP1     |
| chr6:24502522-24528166    | 5   | ALDH5A1  |
| chr19:41220635-41222056   | 11  | AXL      |
| chr10:86912239-86921695   | 10  | BMPR1A   |
| chr7:82335134-82410611    | 5   | CACNA2D1 |
| chr8:25298943-25310532    | 20  | DOCK5    |
| chr21:33579349-33583666   | 10  | DONSON   |
| chr5:137952627-137954376  | 159 | FAM13B   |
| chr6:82225476-82231842    | 35  | IBTK     |
| chrX:153789711-153790851  | 32  | IDH3G    |
| chr12:30665219-30666251   | 5   | IPO8     |
| chr7:149233014-149233369  | 8   | nogene   |
| chr17:45538321-45538589   | 14  | nogene   |
| chr1:173980808-173993135  | 8   | RC3H1    |
| chr3:47661293-47686170    | 8   | SMARCC1  |
| chr17:64578491-64580991   | 15  | SMURF2   |
| chr15:44569397-44570658   | 18  | SPG11    |
| chr7:138504289-138515359  | 17  | TRIM24   |
| chr10:86890061-86892229   | 37  | BMPR1A   |

|                           |     |         |
|---------------------------|-----|---------|
| chr17:66096250-66183307   | 14  | CEP112  |
| chr1:168038370-168068463  | 12  | DCAF6   |
| chrX:131783886-131794466  | 12  | FIRRE   |
| chr10:13659322-13675044   | 6   | FRMD4A  |
| chr12:132720677-132721217 | 56  | PGAM5   |
| chr13:114052051-114073837 | 57  | RASA3   |
| chr6:35857260-35870959    | 14  | SRPK1   |
| chr6:25963048-25963282    | 5   | TRIM38  |
| chr10:37775343-37776575   | 12  | ZNF248  |
| chr1:120530295-120557127  | 8   | nogene  |
| chr6:33398028-33398387    | 30  | KIFC1   |
| chr19:879936-891149       | 10  | MED16   |
| chr11:70330172-70335694   | 38  | PPFIA1  |
| chr12:121335532-121347005 | 15  | ANAPC5  |
| chr8:130214555-130290138  | 5   | ASAP1   |
| chr22:24095930-24134415   | 25  | CABIN1  |
| chr10:68430435-68470163   | 8   | DNA2    |
| chr4:53383772-53399839    | 68  | FIP1L1  |
| chr1:117881822-117920424  | 12  | GDAP2   |
| chr8:43146947-43161507    | 14  | HGSNAT  |
| chr4:3086942-3107423      | 5   | HTT     |
| chr15:41085368-41087682   | 142 | INO80   |
| chr1:236850343-236853088  | 33  | MTR     |
| chr11:119009380-119009891 | 25  | nogene  |
| chr1:28473553-28474151    | 68  | PHACTR4 |
| chr3:142669389-142671122  | 6   | PLS1    |
| chr12:132680606-132681279 | 13  | POLE    |
| chr4:6347845-6381094      | 16  | PPP2R2C |
| chr17:59193491-59197789   | 20  | PRR11   |
| chr22:41268096-41281082   | 123 | RANGAP1 |
| chr11:18502485-18519603   | 13  | TSG101  |
| chr17:19924407-19963022   | 14  | AKAP10  |
| chrX:46669606-46682535    | 41  | SLC9A7  |
| chr9:37126311-37165935    | 14  | ZCCHC7  |
| chr10:87925512-87933251   | 55  | PTEN    |
| chr11:108673466-108693600 | 45  | DDX10   |
| chr3:125019261-125029488  | 5   | HEG1    |
| chr11:34108210-34118503   | 8   | NAT10   |
| chr12:51975264-51976575   | 10  | ACVR1B  |
| chr1:197583151-197617759  | 27  | DENND1B |
| chr17:19936285-19968461   | 9   | AKAP10  |
| chr2:9279316-9350895      | 8   | ASAP2   |
| chr7:33604864-33606553    | 27  | BBS9    |

|                          |     |         |
|--------------------------|-----|---------|
| chr17:66175043-66183307  | 90  | CEP112  |
| chr20:35511362-35512066  | 45  | CEP250  |
| chr1:26432890-26438284   | 8   | DHDDS   |
| chr1:50582617-50596216   | 17  | FAF1    |
| chr1:15767375-15774796   | 5   | FBLIM1  |
| chr8:43059091-43080441   | 9   | FNTA    |
| chr5:151790322-151797428 | 9   | G3BP1   |
| chr6:125277101-125300659 | 9   | HDDC2   |
| chr18:6213148-6244588    | 10  | L3MBTL4 |
| chr1:117493146-117522937 | 12  | MAN1A2  |
| chr14:75038339-75042477  | 9   | MLH3    |
| chr3:27344271-27352919   | 5   | NEK10   |
| chr11:74994508-75005625  | 15  | NEU3    |
| chr20:25476042-25477089  | 9   | NINL    |
| chr15:22845145-22853268  | 8   | NIPA2   |
| chr11:3768580-3776021    | 65  | NUP98   |
| chr13:24469023-24475596  | 76  | PARP4   |
| chr16:71658232-71664099  | 15  | PHLPP2  |
| chr7:100325690-100329019 | 82  | PMS2P1  |
| chr11:71960749-71962289  | 9   | RNF121  |
| chr4:82874610-82875822   | 48  | SEC31A  |
| chr6:132783932-132797121 | 12  | SLC18B1 |
| chr18:2769693-2770108    | 8   | SMCHD1  |
| chr14:75732337-75735289  | 122 | TTLL5   |
| chr1:12299201-12311925   | 27  | VPS13D  |
| chr9:112142319-112157613 | 26  | SUSD1   |
| chr10:32037253-32040457  | 10  | KIF5B   |
| chr6:108319616-108332999 | 9   | nogene  |
| chr1:197172159-197191899 | 16  | ZBTB41  |
| chr17:42818220-42820841  | 11  | BECN1   |
| chr20:33636639-33640531  | 15  | CBFA2T2 |
| chr10:92111075-92145112  | 4   | CPEB3   |
| chr17:44729904-44731015  | 4   | DBF4B   |
| chr9:137754170-137818138 | 4   | EHMT1   |
| chr5:50402285-50405852   | 11  | EMB     |
| chr15:99218587-99221864  | 4   | TTC23   |
| chr6:109475398-109476930 | 19  | ZBTB24  |
| chr10:73739926-73740266  | 13  | nogene  |
| chr22:29825086-29832342  | 10  | ASCC2   |
| chr17:76328716-76348581  | 5   | PRPSAP1 |
| chr20:33619516-33629914  | 25  | CBFA2T2 |
| chr1:32030297-32031640   | 9   | KHDRBS1 |
| chr2:44549554-44558013   | 9   | nogene  |

|                          |     |           |
|--------------------------|-----|-----------|
| chr5:116298246-116318300 | 25  | nogene    |
| chr20:44479984-44486706  | 19  | TTPAL     |
| chr8:98706466-98749390   | 81  | STK3      |
| chr6:104843222-104849246 | 12  | HACE1     |
| chr1:51465260-51481314   | 9   | EPS15     |
| chr7:66808885-66810847   | 106 | RABGEF1   |
| chr2:203489583-203497395 | 7   | RAPH1     |
| chr18:14077328-14085076  | 23  | ZNF519    |
| chr19:32615657-32626827  | 10  | ANKRD27   |
| chr1:233177801-233252788 | 18  | PCNXL2    |
| chr15:78289618-78290771  | 8   | WDR61     |
| chr8:130079901-130092143 | 137 | ASAP1     |
| chr5:163009789-163012288 | 9   | nogene    |
| chrX:48925846-48926050   | 14  | OTUD5     |
| chr8:99274197-99391704   | 7   | VPS13B    |
| chr8:102834188-102839823 | 34  | AZIN1     |
| chr10:68740628-68747566  | 21  | CCAR1     |
| chr8:119850381-119853215 | 17  | DSCC1     |
| chr19:11100222-11102786  | 5   | LDLR      |
| chr2:74156417-74172752   | 14  | MOB1A     |
| chr11:29381090-29384112  | 8   | nogene    |
| chr2:200925835-200937966 | 16  | ORC2      |
| chr2:208300936-208302353 | 14  | PIKFYVE   |
| chr14:73071626-73088161  | 15  | RBM25     |
| chr4:2490336-2497121     | 169 | RNF4      |
| chr15:25340084-25360527  | 7   | UBE3A     |
| chr5:77118319-77118521   | 13  | ZBED3-AS1 |
| chr17:18206814-18208375  | 55  | ALKBH5    |
| chr6:17539268-17543143   | 34  | CAP2      |
| chr3:45091172-45093657   | 5   | CDCP1     |
| chr5:108184941-108186247 | 13  | FBXL17    |
| chr16:81854443-81859163  | 17  | PLCG2     |
| chr13:52433661-52434882  | 5   | VPS36     |
| chr12:45860800-45893721  | 15  | ARID2     |
| chr11:85981128-86031611  | 34  | PICALM    |
| chr1:229539455-229542371 | 17  | ABCB10    |
| chr1:244409484-244437768 | 6   | ADSS      |
| chr12:31689006-31709425  | 31  | AMN1      |
| chr12:45421070-45423062  | 13  | ANO6      |
| chr10:31820386-31861658  | 20  | ARHGAP12  |
| chr16:18797924-18798834  | 171 | ARL6IP1   |
| chrX:1421657-1428121     | 5   | ASMTL     |
| chr5:81987558-82178587   | 8   | ATG10     |

|                           |     |          |
|---------------------------|-----|----------|
| chr7:140776911-140808995  | 31  | BRAF     |
| chr7:16685923-16697061    | 12  | BZW2     |
| chr6:4867355-4892379      | 14  | CDYL     |
| chr18:12999420-13001582   | 104 | CEP192   |
| chr1:26255170-26259802    | 47  | CEP85    |
| chr20:41533049-41533570   | 9   | CHD6     |
| chr5:116087496-116134178  | 12  | COMMD10  |
| chr20:49088008-49089746   | 52  | CSE1L    |
| chr8:103430611-103437307  | 5   | DCAF13   |
| chr15:74640465-74675142   | 8   | EDC3     |
| chr7:2357660-2360902      | 8   | EIF3B    |
| chr8:93706044-93718788    | 68  | FAM92A1  |
| chr5:73006444-73041315    | 5   | FCHO2    |
| chr4:53383772-53391498    | 25  | FIP1L1   |
| chr4:173247979-173248440  | 97  | GALNT7   |
| chr16:81362498-81365478   | 6   | GAN      |
| chr7:139715931-139742038  | 32  | HIPK2    |
| chr3:160356012-160366152  | 9   | IFT80    |
| chr20:21214534-21215648   | 12  | KIZ      |
| chr3:197832196-197839397  | 36  | LRCH3    |
| chr21:25588834-25601467   | 5   | MRPL39   |
| chr17:42538338-42541206   | 11  | NAGLU    |
| chr9:33294419-33295427    | 8   | NFX1     |
| chr5:65780178-65792655    | 12  | NLN      |
| chr1:238471652-238472160  | 25  | nogene   |
| chr22:20710214-20710540   | 45  | nogene   |
| chr6:84532449-84541724    | 18  | nogene   |
| chr19:36310198-36312249   | 10  | nogene   |
| chr11:3778872-3782145     | 12  | NUP98    |
| chrX:68046993-68073299    | 25  | OPHN1    |
| chr10:45862985-45896244   | 11  | PARGP1   |
| chr4:30920152-30950215    | 27  | PCDH7    |
| chr3:48535511-48536463    | 14  | PFKFB4   |
| chr3:138683677-138694907  | 9   | PIK3CB   |
| chr22:27853512-27860241   | 10  | PITPNB   |
| chr5:160093100-160094065  | 36  | PWWP2A   |
| chr3:49056861-49077038    | 14  | QRICH1   |
| chr1:174250474-174278779  | 10  | RABGAP1L |
| chr19:39354005-39357089   | 8   | SAMD4B   |
| chr12:124807760-124817707 | 6   | SCARB1   |
| chr14:30719324-30734858   | 5   | SCFD1    |
| chr11:18611476-18612488   | 16  | SPTY2D1  |
| chr20:13569506-13617123   | 5   | TASP1    |

|                           |      |              |
|---------------------------|------|--------------|
| chr10:94441895-94522453   | 18   | TBC1D12      |
| chr10:113040024-113089540 | 26   | TCF7L2       |
| chr9:33953284-33956146    | 115  | UBAP2        |
| chr10:11997671-12001825   | 7    | UPF2         |
| chr8:99511103-99521010    | 9    | VPS13B       |
| chr17:27304779-27309272   | 30   | WSB1         |
| chr6:43527633-43528928    | 28   | XPO5         |
| chr1:32592930-32595223    | 13   | ZBTB8A       |
| chr6:38061592-38062525    | 15   | ZFAND3       |
| chrX:47846104-47895940    | 560  | ZNF81        |
| chr1:52856997-52867777    | 12   | ZYG11A       |
| chr15:52141139-52154076   | 8    | GNB5         |
| chr1:13773077-13782831    | 19   | PRDM2        |
| chr7:87836192-87860640    | 11   | SLC25A40     |
| chr14:22947170-22948013   | 15   | HAUS4        |
| chr19:32622421-32626827   | 14   | ANKRD27      |
| chr10:73713203-73722577   | 8    | BMS1P4       |
| chr7:16689796-16697061    | 31   | BZW2         |
| chr22:46687106-46721015   | 4    | CERK         |
| chr5:98879551-98881375    | 79   | CHD1         |
| chr1:15638306-15643650    | 123  | DDI2         |
| chr17:56844018-56849232   | 11   | DGKE         |
| chr3:197282678-197297235  | 21   | DLG1         |
| chr2:17761395-17765073    | 5    | GEN1         |
| chr10:87057690-87068157   | 13   | GLUD1        |
| chr7:99030594-99033039    | 8    | LOC101927550 |
| chr19:17720935-17725189   | 6    | MAP1S        |
| chr10:94350112-94352403   | 43   | NOC3L        |
| chr11:68519500-68554257   | 10   | PPP6R3       |
| chr20:18524934-18526531   | 5    | SEC23B       |
| chr12:130806981-130813031 | 14   | STX2         |
| chr6:123224092-123267751  | 19   | TRDN         |
| chr1:10095460-10119613    | 10   | UBE4B        |
| chr5:176943334-176982623  | 8    | UIMC1        |
| chr2:61378362-61395233    | 12   | USP34        |
| chr1:27260955-27287861    | 13   | WDTC1        |
| chr6:150955994-150972058  | 74   | MTHFD1L      |
| chr4:1265339-1270295      | 62   | nogene       |
| chr8:119783380-119791459  | 27   | TAF2         |
| chrX:101101057-101130073  | 11   | CENPI        |
| chr1:117402185-117414831  | 1417 | MAN1A2       |
| chr2:24643965-24658766    | 12   | NCOA1        |
| chr7:66479008-66490107    | 12   | nogene       |

|                           |     |         |
|---------------------------|-----|---------|
| chr1:233217898-233227371  | 232 | PCNXL2  |
| chr22:31725537-31738911   | 63  | PRR14L  |
| chr1:154963518-154970199  | 16  | SHC1    |
| chr18:36576450-36612095   | 15  | FHOD3   |
| chr18:21791373-21799974   | 11  | MIB1    |
| chr17:31155982-31182665   | 106 | NF1     |
| chr16:46668929-46672472   | 8   | VPS35   |
| chr17:41887598-41892447   | 4   | ACLY    |
| chr17:4206320-4209947     | 43  | ANKFY1  |
| chr4:73135116-73177533    | 4   | ANKRD17 |
| chr19:32631401-32644479   | 9   | ANKRD27 |
| chr11:959436-972255       | 6   | AP2A2   |
| chr6:156829226-156835950  | 14  | ARID1B  |
| chr2:175080659-175111654  | 8   | ATF2    |
| chr1:93667095-93674941    | 212 | BCAR3   |
| chr19:3620294-3620706     | 5   | CACTIN  |
| chr10:118685982-118730410 | 16  | CACUL1  |
| chr7:128748572-128759852  | 9   | CALU    |
| chr5:179708380-179708946  | 15  | CANX    |
| chr6:17539268-17541148    | 18  | CAP2    |
| chr2:207714341-207742342  | 10  | CCNYL1  |
| chr11:65079352-65079787   | 14  | CDCA5   |
| chr3:113358744-113366309  | 19  | CFAP44  |
| chr2:201133028-201140439  | 10  | CFLAR   |
| chr5:123557494-123575963  | 8   | CSNK1G3 |
| chr4:1212912-1241519      | 5   | CTBP1   |
| chr1:155602072-155726019  | 14  | DAP3    |
| chr3:57633264-57641747    | 29  | DENND6A |
| chr14:74889094-74894409   | 9   | DLST    |
| chr10:68437010-68445083   | 7   | DNA2    |
| chr6:43225646-43226395    | 9   | DNPH1   |
| chr1:62577261-62625401    | 14  | DOCK7   |
| chr18:49257009-49286616   | 6   | DYM     |
| chr11:32587011-32601822   | 7   | EIF3M   |
| chr7:158773340-158799072  | 154 | ESYT2   |
| chr12:22659013-22673660   | 168 | ETNK1   |
| chrX:54465450-54465852    | 37  | FGD1    |
| chr4:53383772-53453133    | 9   | FIP1L1  |
| chrX:131777622-131784039  | 14  | FIRRE   |
| chr2:31078933-31125253    | 8   | GALNT14 |
| chr3:81642780-81753280    | 8   | GBE1    |
| chr5:55960401-55969855    | 5   | IL6ST   |
| chr14:103673013-103677523 | 8   | KLC1    |

|                           |     |           |
|---------------------------|-----|-----------|
| chr12:50435487-50454417   | 12  | LARP4     |
| chr6:84444386-84556154    | 8   | LINC01611 |
| chr9:110941420-111009201  | 6   | LPAR1     |
| chr6:89751430-89756390    | 9   | MDN1      |
| chr14:67301388-67303599   | 114 | MPP5      |
| chr8:97699753-97713769    | 9   | MTDH      |
| chr12:124398118-124422555 | 12  | NCOR2     |
| chr7:66890250-66894018    | 18  | nogene    |
| chr2:94196054-94203287    | 48  | nogene    |
| chr9:96895895-96942752    | 12  | nogene    |
| chr6:43479877-43480609    | 24  | nogene    |
| chr18:57763778-57780956   | 9   | nogene    |
| chr2:44490785-44549728    | 14  | nogene    |
| chr19:46971313-46971594   | 31  | nogene    |
| chr2:189752848-189754064  | 8   | OSGEPL1   |
| chr5:41799993-41803163    | 13  | OXCT1     |
| chr1:233177801-233218184  | 4   | PCNXL2    |
| chr7:99403397-99404953    | 37  | PDAP1     |
| chr2:10797080-10797757    | 10  | PDIA6     |
| chr2:172570725-172596023  | 46  | PDK1      |
| chr20:9419806-9423952     | 14  | PLCB4     |
| chr22:43939335-43940125   | 14  | PNPLA3    |
| chr8:140735250-140744767  | 6   | PTK2      |
| chr18:8085670-8088851     | 5   | PTPRM     |
| chr7:66797373-66805400    | 7   | RABGEF1   |
| chr9:107302034-107306647  | 17  | RAD23B    |
| chr8:94458267-94467555    | 15  | RAD54B    |
| chrX:16857593-16869220    | 8   | RBBP7     |
| chr2:60891682-60901083    | 7   | REL       |
| chr16:74649131-74661451   | 4   | RFWD3     |
| chr12:120565071-120571291 | 10  | RNF10     |
| chr5:179591624-179594963  | 6   | RUFY1     |
| chr6:148468544-148487715  | 70  | SASH1     |
| chr1:243415701-243426558  | 129 | SDCCAG8   |
| chr4:25127263-25159107    | 75  | SEPSECS   |
| chr11:70798442-70807171   | 6   | SHANK2    |
| chr3:72841044-72844423    | 63  | SHQ1      |
| chr12:46239678-46254936   | 479 | SLC38A1   |
| chr3:27418485-27424152    | 15  | SLC4A7    |
| chr7:17845594-17875790    | 6   | SNX13     |
| chr7:38214356-38219660    | 12  | STARD3NL  |
| chr1:85178145-85190752    | 7   | SYDE2     |
| chr12:103984748-103985728 | 4   | TDG       |



|                           |    |         |
|---------------------------|----|---------|
| chr7:98228013-98229166    | 16 | TECPR1  |
| chr2:70214348-70230854    | 8  | TIA1    |
| chr2:171081639-171117857  | 10 | TLK1    |
| chr22:28163091-28163599   | 52 | TTC28   |
| chr21:37087246-37098160   | 10 | TTC3    |
| chr1:32192310-32193300    | 37 | TXLNA   |
| chr13:29767617-29777263   | 15 | UBL3    |
| chr2:169896506-169906164  | 9  | UBR3    |
| chr19:36065957-36068010   | 6  | WDR62   |
| chr4:1930625-1939778      | 7  | WHSC1   |
| chr16:88598177-88598712   | 6  | ZC3H18  |
| chr19:9364861-9371752     | 29 | ZNF177  |
| chr1:236803430-236816543  | 8  | MTR     |
| chr2:174877839-174878128  | 11 | CHN1    |
| chr9:85956359-85962180    | 29 | NAA35   |
| chr17:5346789-5354490     | 4  | RABEP1  |
| chr4:7838523-7843350      | 21 | AFAP1   |
| chr3:112548532-112558417  | 21 | ATG3    |
| chr7:25151595-25161260    | 10 | C7orf31 |
| chr6:110746125-110779547  | 9  | CDK19   |
| chr1:16625774-16635168    | 18 | CROCCP2 |
| chr9:137728348-137762820  | 78 | EHMT1   |
| chr12:53033805-53038411   | 23 | EIF4B   |
| chr1:240329075-240392562  | 19 | FMN2    |
| chrX:72567888-72568884    | 20 | HDAC8   |
| chr1:40738835-40753246    | 21 | NFYC    |
| chr4:2488370-2488905      | 8  | nogene  |
| chr8:118239714-118241270  | 59 | nogene  |
| chr2:208298640-208302353  | 34 | PIKFYVE |
| chr11:111747953-111755450 | 6  | PPP2R1B |
| chrX:20193486-20204103    | 7  | RPS6KA3 |
| chr11:62885176-62885608   | 25 | SLC3A2  |
| chr9:111922848-111931357  | 70 | UGCG    |
| chr2:218546918-218560883  | 10 | USP37   |
| chr19:2180712-2194577     | 31 | DOT1L   |
| chr5:127526617-127547921  | 39 | PRRC1   |
| chr8:103652204-103697296  | 19 | RIMS2   |
| chr7:5721032-5730817      | 7  | RNF216  |
| chr16:68181474-68183366   | 5  | NFATC3  |
| chr2:201707868-201710038  | 13 | ALS2    |
| chr11:46780193-46790583   | 5  | CKAP5   |
| chr1:75787496-75791571    | 13 | RABGGTB |
| chr17:5388801-5399650     | 91 | NUP88   |

|                           |    |          |
|---------------------------|----|----------|
| chr1:58681784-58685251    | 28 | MYSM1    |
| chrX:63697124-63706449    | 19 | ARHGEF9  |
| chr16:14661891-14665071   | 6  | BFAR     |
| chr2:119311621-119340361  | 6  | C2orf76  |
| chr3:33124407-33132700    | 8  | CRTAP    |
| chr2:75518055-75526199    | 52 | EVA1A    |
| chr5:141625207-141630125  | 12 | HDAC3    |
| chr7:110886592-111561923  | 11 | IMMP2L   |
| chr10:69005045-69011015   | 8  | KIAA1279 |
| chr5:78592144-78632368    | 8  | LHFPL2   |
| chr15:67580753-67600749   | 82 | MAP2K5   |
| chr14:64448216-64449622   | 32 | MTHFD1   |
| chr12:56224833-56226419   | 23 | NABP2    |
| chr5:36953617-36958231    | 18 | NIPBL    |
| chr9:83574088-83575055    | 20 | nogene   |
| chr17:7408011-7415671     | 11 | nogene   |
| chr4:2949933-2953645      | 9  | NOP14    |
| chr11:3762901-3776021     | 14 | NUP98    |
| chr14:63415139-63453885   | 8  | PPP2R5E  |
| chr2:101281858-101295181  | 77 | RNF149   |
| chr4:109491326-109506512  | 19 | SEC24B   |
| chr11:230451-233534       | 7  | SIRT3    |
| chr16:18815174-18819654   | 9  | SMG1     |
| chr5:122998207-123002004  | 4  | SNX24    |
| chr17:63351249-63355390   | 4  | TANC2    |
| chr1:234450427-234472811  | 59 | TARBP1   |
| chr10:94500220-94522453   | 28 | TBC1D12  |
| chr17:54912665-54947312   | 26 | TOM1L1   |
| chr19:34430575-34464131   | 23 | UBA2     |
| chrX:41128999-41134837    | 5  | USP9X    |
| chr8:99556449-99577633    | 10 | VPS13B   |
| chr10:1124217-1125024     | 50 | WDR37    |
| chr3:47169168-47174263    | 13 | KIF9-AS1 |
| chr9:131135939-131147584  | 6  | NUP214   |
| chr5:87331347-87346724    | 12 | RASA1    |
| chr12:121417860-121420778 | 21 | RNF34    |
| chr20:56473300-56477124   | 18 | RTFDC1   |
| chr22:28629551-28631128   | 20 | TTC28    |
| chr4:168220654-168225676  | 4  | DDX60    |
| chr12:123647962-123651156 | 6  | GTF2H3   |
| chr10:13195040-13198807   | 5  | MCM10    |
| chr3:196245384-196245731  | 32 | nogene   |
| chr4:82821036-82829058    | 4  | SEC31A   |

|                           |     |          |
|---------------------------|-----|----------|
| chr20:63521283-63521589   | 24  | PPDPF    |
| chr15:50574851-50575789   | 65  | TRPM7    |
| chr17:18024623-18028659   | 25  | ATPAF2   |
| chr2:36387971-36479694    | 10  | CRIM1    |
| chr18:6171827-6312056     | 13  | L3MBTL4  |
| chr4:184672172-184682336  | 13  | PRIMPOL  |
| chr1:150817919-150826617  | 35  | ARNT     |
| chr3:11313303-11333093    | 9   | ATG7     |
| chr10:115120184-115129535 | 260 | ATRNL1   |
| chr17:43067607-43074521   | 49  | BRCA1    |
| chr6:20649292-20781265    | 12  | CDKAL1   |
| chr1:20980333-21050994    | 32  | EIF4G3   |
| chr5:151786602-151791062  | 39  | G3BP1    |
| chr9:19063007-19063580    | 25  | HAUS6    |
| chr15:69421646-69422435   | 62  | KIF23    |
| chr17:12081355-12129287   | 11  | MAP2K4   |
| chr16:29809539-29809764   | 93  | MAZ      |
| chr13:29480149-29492719   | 31  | MTUS2    |
| chr20:36687491-36688784   | 70  | NDRG3    |
| chr15:55951375-55966546   | 28  | NEDD4    |
| chr12:73444851-73477374   | 21  | nogene   |
| chr19:19786608-19789821   | 12  | nogene   |
| chr3:167695595-167720273  | 19  | PDCD10   |
| chr20:20653529-20680801   | 7   | RALGAPA2 |
| chr6:13652658-13696896    | 24  | RANBP9   |
| chr17:59119318-59131367   | 10  | SKA2     |
| chr4:42001615-42020515    | 9   | SLC30A9  |
| chr3:63826823-63839773    | 6   | THOC7    |
| chr15:42775134-42817097   | 7   | TTBK2    |
| chr13:45516142-45519094   | 21  | COG3     |
| chr7:107548110-107558115  | 12  | COG5     |
| chr10:68422224-68422890   | 26  | DNA2     |
| chr1:198232552-198264235  | 25  | NEK7     |
| chr20:34031521-34033318   | 4   | RALY     |
| chr18:23006362-23022270   | 16  | RBBP8    |
| chr8:118375781-118379700  | 167 | SAMD12   |
| chr12:48074323-48074793   | 6   | SENP1    |
| chr8:66835762-66836074    | 5   | SGK3     |
| chr3:98756368-98772916    | 26  | ST3GAL6  |
| chr13:41230052-41230334   | 10  | nogene   |
| chr15:50583088-50592626   | 35  | TRPM7    |
| chr19:1031070-1032696     | 54  | CNN2     |
| chr13:30254104-30255615   | 80  | KATNAL1  |

|                           |     |          |
|---------------------------|-----|----------|
| chr19:41866111-41867454   | 15  | nogene   |
| chr3:185492224-185493651  | 7   | nogene   |
| chr5:177244194-177246796  | 33  | NSD1     |
| chr9:127925106-127925979  | 5   | PIP5KL1  |
| chr4:2470986-2500738      | 6   | RNF4     |
| chr3:25643693-25645455    | 4   | TOP2B    |
| chr15:90486953-90491545   | 9   | IQGAP1   |
| chr17:13892724-13898732   | 9   | nogene   |
| chr13:24477700-24503777   | 16  | PARP4    |
| chr1:94498601-94506642    | 14  | ABCD3    |
| chr20:49637340-49647078   | 8   | B4GALT5  |
| chr11:116757145-116760952 | 8   | BUD13    |
| chr7:6425987-6436533      | 24  | DAGLB    |
| chr21:33534578-33535320   | 24  | GART     |
| chr22:29978441-29991670   | 59  | MTMR3    |
| chr16:15677800-15687511   | 8   | NDE1     |
| chr3:52490231-52490678    | 5   | NISCH    |
| chr5:65758566-65763108    | 9   | NLN      |
| chr1:169298555-169303195  | 14  | NME7     |
| chr4:128037203-128037435  | 8   | nogene   |
| chr5:10213490-10224061    | 330 | nogene   |
| chr12:68690630-68702784   | 9   | NUP107   |
| chr20:3910576-3918796     | 21  | PANK2    |
| chr4:107653490-107701285  | 8   | PAPSS1   |
| chr10:34450316-34696419   | 16  | PARD3    |
| chr11:64927801-64928425   | 8   | PPP2R5B  |
| chr18:22936753-22949713   | 54  | RBBP8    |
| chr7:66991136-66994341    | 15  | SBDS     |
| chr7:29940681-29944179    | 10  | SCRN1    |
| chr12:111418118-111420488 | 8   | SH2B3    |
| chr15:43377846-43383504   | 11  | TUBGCP4  |
| chr2:170040881-170061443  | 4   | UBR3     |
| chr1:21701497-21706868    | 7   | USP48    |
| chr10:45651965-45663842   | 8   | ZFAND4   |
| chr1:35093913-35113181    | 8   | ZMYM1    |
| chr14:102331621-102339223 | 9   | ZNF839   |
| chr3:138570317-138571356  | 409 | CEP70    |
| chr1:117896832-117920424  | 21  | GDAP2    |
| chr18:49286433-49379758   | 7   | DYM      |
| chr10:31843460-31861658   | 11  | ARHGAP12 |
| chr7:102158559-102178657  | 71  | CUX1     |
| chr2:190510360-190525378  | 17  | NEMP2    |
| chr9:112268048-112297916  | 557 | PTBP3    |

|                           |     |          |
|---------------------------|-----|----------|
| chr6:47574063-47582065    | 32  | CD2AP    |
| chr20:2492698-2500742     | 9   | ZNF343   |
| chr12:110473077-110486717 | 18  | FAM216A  |
| chr9:98780188-98782573    | 47  | ANKS6    |
| chr10:7798989-7802854     | 9   | ATP5C1   |
| chr5:138512763-138513706  | 4   | ETF1     |
| chr11:12236176-12239585   | 19  | MICAL2   |
| chr2:203041764-203057453  | 12  | NBEAL1   |
| chr15:25059154-25062088   | 9   | nogene   |
| chr5:37302778-37305210    | 5   | NUP155   |
| chr16:56466151-56468018   | 13  | OGFOD1   |
| chr15:50739679-50748870   | 5   | SPPL2A   |
| chr12:130795994-130801488 | 5   | STX2     |
| chr1:162566011-162568386  | 23  | UAP1     |
| chr19:43543390-43546977   | 4   | XRCC1    |
| chr16:3506330-3512478     | 26  | CLUAP1   |
| chr12:53018797-53028188   | 6   | EIF4B    |
| chr14:54702061-54702580   | 401 | SAMD4A   |
| chr17:64583460-64591149   | 9   | SMURF2   |
| chr4:102799406-102802638  | 10  | UBE2D3   |
| chr10:93500039-93507056   | 19  | CEP55    |
| chr6:17647806-17649300    | 15  | NUP153   |
| chr16:47311239-47313836   | 10  | ITFG1    |
| chr2:235968461-235975448  | 24  | AGAP1    |
| chr5:126575419-126593404  | 49  | ALDH7A1  |
| chr5:112754872-112767390  | 46  | APC      |
| chr19:16509149-16509988   | 8   | C19orf44 |
| chr5:154029488-154034946  | 11  | FAM114A2 |
| chr18:76441244-76443211   | 89  | ZNF516   |
| chr1:12455997-12460396    | 15  | VPS13D   |
| chr15:90486953-90492711   | 42  | IQGAP1   |
| chr18:6213148-6312056     | 34  | L3MBTL4  |
| chr1:45654542-45655319    | 31  | GPBP1L1  |
| chr2:26263379-26285571    | 11  | HADHB    |
| chr15:66349059-66351600   | 34  | TIPIN    |
| chr2:178540106-178600667  | 11  | TTN-AS1  |
| chr4:2875895-2884666      | 70  | ADD1     |
| chr22:25685169-25695214   | 11  | ADRBK2   |
| chr1:165679441-165683110  | 188 | ALDH9A1  |
| chr14:55380572-55382191   | 13  | ATG14    |
| chrX:77688817-77698629    | 9   | ATRX     |
| chr2:32597750-32611582    | 7   | BIRC6    |
| chr7:16674411-16681404    | 9   | BZW2     |

|                           |     |           |
|---------------------------|-----|-----------|
| chr11:76458182-76472840   | 19  | C11orf30  |
| chr1:207757013-207759724  | 23  | CD46      |
| chr11:61329362-61330074   | 76  | DDB1      |
| chr11:108688935-108723462 | 15  | DDX10     |
| chr11:103303092-103323990 | 202 | DYNC2H1   |
| chr9:137716625-137717182  | 40  | EHMT1     |
| chr22:31468174-31471917   | 10  | EIF4ENIF1 |
| chr5:50402285-50411383    | 241 | EMB       |
| chr4:88990972-89009078    | 19  | FAM13A    |
| chr12:112306063-112313147 | 24  | HECTD4    |
| chr6:34240736-34243518    | 116 | HMGA1     |
| chr21:33810974-33819323   | 9   | ITSN1     |
| chr1:32154587-32159531    | 21  | KPNA6     |
| chr3:45474242-45500579    | 9   | LARS2     |
| chr3:197830769-197866219  | 13  | LRCH3     |
| chr14:50462664-50482416   | 8   | MAP4K5    |
| chr5:113063983-113085310  | 16  | MCC       |
| chr2:190655976-190673152  | 96  | NAB1      |
| chr2:203056426-203068475  | 5   | NBEAL1    |
| chr17:31155982-31163376   | 92  | NF1       |
| chr16:57017073-57021007   | 5   | NLRC5     |
| chr12:10506539-10506769   | 7   | nogene    |
| chr7:128591849-128609579  | 20  | nogene    |
| chr1:5947103-5986327      | 41  | NPHP4     |
| chr2:178284926-178328378  | 9   | OSBPL6    |
| chr11:77355667-77359017   | 17  | PAK1      |
| chr13:24459043-24478276   | 6   | PARP4     |
| chr2:70046502-70051305    | 24  | PCBP1-AS1 |
| chr11:34957383-34992379   | 53  | PDHX      |
| chr7:30045084-30062742    | 11  | PLEKHA8   |
| chr22:46198341-46198591   | 12  | PPARA     |
| chr12:27650009-27667320   | 18  | PPFIBP1   |
| chr14:61529074-61530595   | 5   | PRKCH     |
| chr1:43569589-43578920    | 8   | PTPRF     |
| chr16:22429795-22435812   | 18  | RRN3P3    |
| chr2:127989563-127989866  | 30  | SAP130    |
| chr10:73746629-73747004   | 29  | SEC24C    |
| chr13:49480218-49483563   | 11  | SETDB2    |
| chr8:91289135-91295703    | 6   | SLC26A7   |
| chr4:185339378-185346650  | 26  | SNX25     |
| chr1:172551511-172557794  | 293 | SUCO      |
| chr6:121279120-121310847  | 7   | TBC1D32   |
| chr12:64484302-64486017   | 33  | TBK1      |

|                           |     |              |
|---------------------------|-----|--------------|
| chr10:45975453-45988847   | 426 | TIMM23       |
| chr14:21488589-21489403   | 9   | TOX4         |
| chr17:56908467-56908877   | 12  | TRIM25       |
| chr14:90578105-90618045   | 12  | TTC7B        |
| chr9:77238001-77238386    | 21  | VPS13A       |
| chr8:99096311-99275254    | 10  | VPS13B       |
| chr8:99111097-99121445    | 10  | VPS13B       |
| chr12:122238586-122239945 | 9   | VPS33A       |
| chr2:63968956-63981887    | 15  | VPS54        |
| chr20:63789820-63805464   | 6   | ZBTB46       |
| chr8:143688661-143690123  | 27  | ZNF707       |
| chr7:45736786-45759174    | 39  | SEPT7P2      |
| chr1:220114313-220139139  | 10  | IARS2        |
| chr19:17733192-17734416   | 7   | MAP1S        |
| chr3:8935870-8948570      | 50  | RAD18        |
| chr9:132887368-132888437  | 5   | C9orf9       |
| chr9:129506176-129506420  | 8   | nogene       |
| chr12:19462509-19493986   | 36  | AEBP2        |
| chr11:77624962-77625818   | 838 | CLNS1A       |
| chr15:65729071-65756472   | 8   | DENND4A      |
| chr1:225167938-225185425  | 71  | DNAH14       |
| chr2:25313912-25314161    | 6   | DNMT3A       |
| chr12:53019909-53022627   | 81  | EIF4B        |
| chr12:1289851-1444750     | 39  | ERC1         |
| chr6:629834-647666        | 10  | EXOC2        |
| chr14:53156242-53189936   | 10  | LOC101927620 |
| chr16:48256609-48303305   | 67  | LONP2        |
| chr10:68175322-68189126   | 26  | MYPN         |
| chr9:124684600-124684986  | 13  | nogene       |
| chr2:155759630-155814067  | 7   | nogene       |
| chr6:34288739-34295685    | 6   | NUDT3        |
| chr12:123484179-123499536 | 5   | RILPL1       |
| chr6:145893214-145894977  | 18  | SHPRH        |
| chr5:151458787-151467925  | 11  | SLC36A1      |
| chr17:37440504-37462121   | 18  | TADA2A       |
| chr4:26748410-26769852    | 16  | TBC1D19      |
| chr5:14222781-14280436    | 10  | TRIO         |
| chr7:98965695-98971945    | 13  | TRRAP        |
| chr1:162588692-162590511  | 9   | UAP1         |
| chr15:75854385-75883424   | 55  | UBE2Q2       |
| chr2:23958300-23983033    | 10  | UBXN2A       |
| chr3:51466802-51483836    | 7   | VPRBP        |
| chr18:56756582-56758953   | 173 | WDR7         |

|                           |     |          |
|---------------------------|-----|----------|
| chr3:141368620-141381487  | 11  | ZBTB38   |
| chr10:31495775-31502509   | 26  | ZEB1     |
| chr1:77631849-77633405    | 15  | ZZZ3     |
| chr2:37199703-37201726    | 15  | CEBPZOS  |
| chr16:56385918-56409588   | 6   | AMFR     |
| chr5:78141142-78165672    | 5   | AP3B1    |
| chr3:94003658-94003908    | 141 | ARL13B   |
| chr10:114843740-114848737 | 26  | FAM160B1 |
| chr1:93896617-93904588    | 21  | GCLM     |
| chr16:74474545-74477533   | 9   | GLG1     |
| chr3:155897926-155906263  | 17  | GMPS     |
| chr5:179768849-179771243  | 50  | MAML1    |
| chr1:167772274-167788137  | 98  | MPZL1    |
| chr6:130311290-130341122  | 8   | nogene   |
| chr16:23603586-23608012   | 8   | PALB2    |
| chr22:31556941-31561392   | 12  | SFI1     |
| chr19:38141183-38164906   | 9   | SIPA1L3  |
| chr2:85637368-85641118    | 8   | USP39    |
| chr1:48305786-48359770    | 17  | SPATA6   |
| chr9:120447894-120471878  | 6   | CDK5RAP2 |
| chr1:225167938-225231151  | 35  | DNAH14   |
| chr4:36187450-36214480    | 9   | ARAP2    |
| chr20:49646964-49647892   | 12  | B4GALT5  |
| chr17:30266884-30272899   | 29  | BLMH     |
| chr8:96784863-96785330    | 11  | CPQ      |
| chr3:142181460-142187779  | 10  | GK5      |
| chr1:150661813-150663763  | 10  | GOLPH3L  |
| chr11:18407116-18446333   | 36  | LDHA     |
| chr20:37301207-37302425   | 18  | MANBAL   |
| chr5:43609142-43628387    | 21  | NNT      |
| chr11:70366524-70372534   | 12  | nogene   |
| chr2:97267654-97267971    | 31  | nogene   |
| chr7:24815058-24816688    | 11  | OSBPL3   |
| chr6:37374619-37381354    | 12  | RNF8     |
| chr13:29514352-29536202   | 48  | SLC7A1   |
| chr1:35097316-35110447    | 12  | ZMYM1    |
| chr10:31820386-31852597   | 4   | ARHGAP12 |
| chr10:100806429-100809236 | 4   | PAX2     |
| chr2:24554388-24564430    | 42  | nogene   |
| chr5:14286870-14297263    | 14  | TRIO     |
| chr4:102525511-102567135  | 32  | NFKB1    |
| chr3:141403926-141405887  | 12  | ZBTB38   |
| chr3:52911002-52913617    | 4   | SFMBT1   |



|                           |     |              |
|---------------------------|-----|--------------|
| chr11:72726619-72732597   | 11  | ARAP1        |
| chr10:73704985-73721504   | 17  | BMS1P4       |
| chr16:3504719-3515591     | 12  | CLUAP1       |
| chrX:130783546-130809261  | 8   | ENOX2        |
| chr2:26364301-26373629    | 32  | EPT1         |
| chr7:22976209-22984045    | 437 | FAM126A      |
| chr12:32564136-32701562   | 24  | FGD4         |
| chr7:112455762-112457038  | 9   | IFRD1        |
| chr15:41081019-41087682   | 53  | INO80        |
| chr12:2820085-2836956     | 4   | ITFG2        |
| chr8:89724628-89725641    | 7   | LOC101929709 |
| chr2:63597398-63599292    | 9   | MDH1         |
| chr5:154950820-154960049  | 176 | MRPL22       |
| chr12:65306862-65328603   | 20  | MSRB3        |
| chr16:69982349-69986509   | 9   | PDXDC2P      |
| chr12:26990449-26999676   | 48  | TM7SF3       |
| chr7:66941847-66951135    | 16  | TMEM248      |
| chr6:42573733-42592229    | 4   | UBR2         |
| chr8:99431536-99556653    | 4   | VPS13B       |
| chr15:80098415-80122800   | 90  | ZFAND6       |
| chr1:243512323-243843282  | 11  | AKT3         |
| chr20:20022455-20022988   | 23  | NAA20        |
| chr17:8450779-8454887     | 8   | NDEL1        |
| chr14:75087017-75088641   | 35  | NEK9         |
| chr6:141772872-141831645  | 18  | nogene       |
| chr2:37316236-37317899    | 36  | PRKD3        |
| chr12:64062916-64097375   | 8   | SRGAP1       |
| chr10:69185986-69186550   | 14  | SUPV3L1      |
| chr9:6475390-6482099      | 21  | UHRF2        |
| chr4:1904215-1918623      | 33  | WHSC1        |
| chr17:81979183-81985607   | 60  | ASPSCR1      |
| chr17:2330514-2332359     | 19  | TSR1         |
| chr19:38723936-38724565   | 37  | ACTN4        |
| chr8:130167535-130187285  | 21  | ASAP1        |
| chr10:101847403-101849892 | 15  | C10orf76     |
| chr10:101975211-101995355 | 25  | C10orf76     |
| chr20:33628349-33629914   | 13  | CBFA2T2      |
| chr22:17044872-17047426   | 381 | CECR7        |
| chr20:35508942-35510054   | 14  | CEP250       |
| chr1:108943474-108950448  | 18  | CLCC1        |
| chr4:140409836-140413087  | 5   | CLGN         |
| chr11:14469335-14477015   | 15  | COPB1        |
| chr12:108652271-108678394 | 9   | CORO1C       |

|                           |     |          |
|---------------------------|-----|----------|
| chr1:168065589-168068463  | 12  | DCAF6    |
| chr1:168019544-168023047  | 12  | DCAF6    |
| chr8:131940498-131950090  | 11  | EFR3A    |
| chr7:158759485-158773396  | 16  | ESYT2    |
| chr1:77873003-77875111    | 32  | FAM73A   |
| chr1:240123178-240178068  | 9   | FMN2     |
| chr5:151790322-151791062  | 368 | G3BP1    |
| chr1:1806474-1839238      | 14  | GNB1     |
| chr15:52133377-52141272   | 6   | GNB5     |
| chr7:74705163-74716950    | 49  | GTF2I    |
| chr4:105693298-105695668  | 10  | INTS12   |
| chr9:111428041-111442424  | 20  | KIAA0368 |
| chr2:61092463-61106662    | 8   | KIAA1841 |
| chr14:74091231-74101238   | 106 | LIN52    |
| chr16:954356-954666       | 209 | LMF1     |
| chr12:68835828-68839801   | 5   | MDM2     |
| chr2:15534542-15539356    | 36  | NBAS     |
| chr15:61015797-61041377   | 4   | nogene   |
| chr3:129867009-129880562  | 11  | nogene   |
| chr6:44253209-44253683    | 10  | nogene   |
| chr1:229458160-229460769  | 9   | NUP133   |
| chr11:3768580-3771928     | 17  | NUP98    |
| chr5:139363758-139364743  | 67  | PAIP2    |
| chr10:13294427-13295606   | 8   | PHYH     |
| chr22:27853536-27860241   | 34  | PITPNB   |
| chr3:121532989-121544906  | 9   | POLQ     |
| chr7:42917513-42917835    | 9   | PSMA2    |
| chr11:73716250-73730823   | 21  | RAB6A    |
| chr6:42880860-42886470    | 61  | RPL7L1   |
| chr13:23365165-23368487   | 70  | SACS     |
| chr14:39045162-39063413   | 9   | SEC23A   |
| chr10:13328350-13345028   | 14  | SEPHS1   |
| chr13:29550203-29553860   | 30  | SLC7A1   |
| chr19:49090290-49098704   | 6   | SNRNP70  |
| chr7:105203627-105297533  | 21  | SRPK2    |
| chr7:832504-842130        | 13  | SUN1     |
| chr4:26717932-26753890    | 6   | TBC1D19  |
| chr9:100308499-100310379  | 27  | TEX10    |
| chr15:99156147-99175155   | 5   | TTC23    |
| chr12:104311289-104327671 | 47  | TXNRD1   |
| chr17:4289229-4296814     | 12  | UBE2G1   |
| chr3:184936245-184999861  | 9   | VPS8     |
| chr3:44629064-44631221    | 43  | ZNF197   |

|                           |    |              |
|---------------------------|----|--------------|
| chr16:75608223-75608988   | 4  | ADAT1        |
| chr2:68490189-68567387    | 12 | APLF         |
| chr8:130136950-130187285  | 4  | ASAP1        |
| chr11:63651935-63652575   | 4  | ATL3         |
| chrX:139802235-139826823  | 4  | ATP11C       |
| chr6:99375939-99383824    | 28 | COQ3         |
| chr1:197595207-197715074  | 5  | DENND1B      |
| chr10:99894945-99900066   | 13 | DNMBP        |
| chr14:73729639-73730179   | 8  | ELMSAN1      |
| chr1:113091317-113096365  | 8  | LRIG2        |
| chrX:150744360-150751240  | 4  | MTMR1        |
| chr1:32231743-32232184    | 16 | MTMR9LP      |
| chr2:53603390-53606080    | 4  | nogene       |
| chr6:57050571-57050975    | 24 | nogene       |
| chr1:207815928-207819146  | 4  | nogene       |
| chr1:233250738-233263163  | 10 | PCNXL2       |
| chr11:70324401-70326818   | 5  | PPFIA1       |
| chr14:103752999-103754244 | 41 | PPP1R13B     |
| chr2:135120818-135135932  | 4  | RAB3GAP1     |
| chr5:131592382-131624334  | 6  | RAPGEF6      |
| chr9:4841201-4860901      | 14 | RCL1         |
| chr19:47150201-47155213   | 16 | SAE1         |
| chr1:161323613-161328497  | 4  | SDHC         |
| chr7:35863551-35873775    | 14 | 7-Sep        |
| chr20:5106187-5109445     | 53 | TMEM230      |
| chr15:99241364-99245510   | 10 | TTC23        |
| chr16:3311752-3313175     | 5  | ZNF75A       |
| chr3:9750944-9751957      | 23 | OGG1         |
| chr14:23061083-23061622   | 37 | ACIN1        |
| chr15:85664562-85684873   | 4  | AKAP13       |
| chr12:14456560-14466590   | 11 | ATF7IP       |
| chr22:24035443-24038461   | 32 | CABIN1       |
| chr16:53247292-53255779   | 7  | CHD9         |
| chr2:36499218-36522313    | 45 | CRIM1        |
| chr5:138904348-138925407  | 6  | CTNNA1       |
| chr12:100591735-100601753 | 20 | GAS2L3       |
| chr5:75343852-75351602    | 4  | HMGCR        |
| chr3:185692698-185698347  | 10 | IGF2BP2      |
| chr1:187324092-187329060  | 14 | LINC01036    |
| chr4:124522106-124556510  | 7  | LOC101927087 |
| chr4:150896393-150916738  | 13 | LRBA         |
| chr5:33023074-33027826    | 8  | nogene       |
| chr9:2652943-2668061      | 8  | nogene       |

|                           |     |          |
|---------------------------|-----|----------|
| chr12:11053032-11121180   | 11  | nogene   |
| chr11:17926737-18010139   | 6   | nogene   |
| chr14:103752999-103757751 | 13  | PPP1R13B |
| chr12:118019071-118025828 | 11  | RFC5     |
| chr2:171826797-171855949  | 8   | SLC25A12 |
| chr20:17952586-17954117   | 114 | SNX5     |
| chr17:55031167-55081183   | 35  | STXBP4   |
| chr17:31975481-31988497   | 16  | SUZ12    |
| chr4:38014508-38027879    | 6   | TBC1D1   |
| chr8:140397619-140426641  | 78  | TRAPPC9  |
| chr18:178932-192900       | 11  | USP14    |
| chr1:247156831-247159813  | 8   | ZNF124   |
| chr8:104093470-104148848  | 24  | nogene   |
| chr3:160375811-160384646  | 8   | IFT80    |
| chr4:99028866-99048876    | 27  | METAP1   |
| chr8:47595810-47713641    | 5   | SPIDR    |
| chr3:196362293-196362687  | 81  | UBXN7    |
| chr16:14984049-14986841   | 31  | nogene   |
| chr2:68490189-68513680    | 42  | APLF     |
| chr12:31451939-31452476   | 16  | DENND5B  |
| chr1:167765582-167788137  | 73  | MPZL1    |
| chr14:62950132-62950559   | 13  | KCNH5    |
| chr8:140846259-140912467  | 8   | PTK2     |
| chr17:2394042-2395454     | 470 | MNT      |
| chr12:71769799-71774022   | 138 | RAB21    |
| chr17:17884633-17893810   | 11  | TOM1L2   |
| chr7:158748193-158767774  | 6   | ESYT2    |
| chr1:8465924-8541318      | 12  | RERE     |
| chr3:149902071-149921227  | 48  | RNF13    |
| chr10:110964124-110965061 | 19  | SHOC2    |
| chr15:63529013-63574403   | 74  | USP3     |
| chr19:23662113-23663158   | 8   | ZNF675   |
| chr3:195342470-195345317  | 47  | ACAP2    |
| chr19:49781756-49782724   | 49  | AP2A1    |
| chr20:48951322-48952884   | 16  | ARFGEF2  |
| chr6:110626775-110632161  | 5   | CDK19    |
| chr6:82214226-82223620    | 8   | IBTK     |
| chrX:103879163-103882115  | 6   | nogene   |
| chr3:47052738-47052999    | 6   | nogene   |
| chr3:170280226-170284596  | 9   | PRKCI    |
| chr22:49787389-49794294   | 20  | BRD1     |
| chr20:44978442-45001353   | 5   | STK4     |
| chr7:67067284-67117618    | 24  | TYW1     |

|                           |     |          |
|---------------------------|-----|----------|
| chr1:193232992-193236356  | 37  | CDC73    |
| chr12:96294998-96297721   | 6   | CDK17    |
| chr18:6237963-6244588     | 40  | L3MBTL4  |
| chr10:27173120-27181581   | 47  | MASTL    |
| chr19:16079987-16080498   | 10  | nogene   |
| chr7:105160506-105268869  | 19  | SRPK2    |
| chr1:26897300-26897725    | 18  | GPATCH3  |
| chr1:113119232-113119523  | 13  | LRIG2    |
| chr8:94530962-94538346    | 12  | KIAA1429 |
| chr6:136070223-136111101  | 8   | nogene   |
| chr11:129123445-129164427 | 135 | ARHGAP32 |
| chr19:48221729-48241063   | 15  | CARD8    |
| chr7:65066252-65067050    | 25  | CCT6P3   |
| chr3:138570317-138571353  | 5   | CEP70    |
| chr16:53255599-53274302   | 48  | CHD9     |
| chr11:7665323-7672891     | 5   | CYB5R2   |
| chr21:33426883-33432871   | 40  | IFNGR2   |
| chr17:46169530-46172232   | 32  | KANSL1   |
| chr1:235677090-235697272  | 17  | LYST     |
| chr9:4841204-4860901      | 20  | nogene   |
| chr20:13559007-13569586   | 25  | TASP1    |
| chr8:102271133-102272772  | 20  | UBR5     |
| chr20:52097372-52098587   | 29  | ZFP64    |
| chr4:128992166-129039096  | 29  | SCLT1    |
| chr5:160035139-160036803  | 16  | TTC1     |
| chr1:223798214-223798677  | 16  | TP53BP2  |
| chrX:120532421-120534586  | 4   | CUL4B    |
| chr7:94618757-94629841    | 78  | SGCE     |
| chr2:24563903-24584560    | 15  | NCOA1    |
| chr4:61934839-61998265    | 15  | ADGRL3   |
| chr15:92967324-92967513   | 34  | CHD2     |
| chr17:34983001-34986131   | 48  | LIG3     |
| chrX:23721880-23733217    | 37  | ACOT9    |
| chr2:32543240-32545860    | 11  | BIRC6    |
| chr17:769868-778744       | 10  | GLOD4    |
| chr11:75851882-75880040   | 23  | UVRAG    |
| chr4:145870244-145892415  | 12  | ZNF827   |
| chr12:109249983-109259108 | 7   | ACACB    |
| chr9:74996446-74999870    | 9   | CARNMT1  |
| chr11:125643791-125656335 | 8   | CHEK1    |
| chr22:28699837-28734727   | 38  | CHEK2    |
| chr20:38983698-38994880   | 87  | DHX35    |
| chr1:245002120-245017326  | 143 | EFCAB2   |

|                           |     |           |
|---------------------------|-----|-----------|
| chr4:98887078-98891332    | 8   | EIF4E     |
| chr14:57235710-57244359   | 18  | EXOC5     |
| chr3:56660730-56673725    | 196 | FAM208A   |
| chr16:53879843-53934109   | 20  | FTO       |
| chr5:151790322-151799313  | 24  | G3BP1     |
| chr4:157120555-157153010  | 4   | GLRB      |
| chr19:38843841-38847434   | 15  | HNRNPL    |
| chr2:238173533-238194870  | 18  | ILKAP     |
| chr16:27618424-27631162   | 9   | KIAA0556  |
| chr4:39075964-39086727    | 137 | KLHL5     |
| chr7:152263015-152315338  | 76  | KMT2C     |
| chr14:50265357-50284033   | 11  | L2HGDH    |
| chr3:197613224-197624197  | 10  | LOC220729 |
| chr6:52267864-52277688    | 16  | MCM3      |
| chr10:72708282-72715902   | 41  | MCU       |
| chr18:50924097-50940386   | 7   | ME2       |
| chr11:93793727-93801972   | 4   | MED17     |
| chr2:99194750-99195756    | 24  | MRPL30    |
| chr5:72290949-72297702    | 8   | MRPS27    |
| chr12:76053090-76056161   | 13  | NAP1L1    |
| chr16:68157868-68191775   | 17  | NFATC3    |
| chr15:34143889-34144680   | 33  | nogene    |
| chr10:5712393-5714207     | 5   | nogene    |
| chr3:23956036-23959815    | 43  | NR1D2     |
| chr18:9583116-9595102     | 406 | PPP4R1    |
| chr11:45181760-45183123   | 6   | PRDM11    |
| chr17:66732687-66742760   | 55  | PRKCA     |
| chr17:1842802-1877314     | 24  | RPA1      |
| chr10:116901764-116921516 | 14  | SHTN1     |
| chr1:108181940-108185954  | 28  | SLC25A24  |
| chr15:64980863-64983593   | 84  | SPG21     |
| chr17:9505037-9557528     | 5   | STX8      |
| chr11:87067693-87075786   | 39  | TMEM135   |
| chr15:51869216-51889145   | 8   | TMOD3     |
| chr19:49196439-49196874   | 5   | TRPM4     |
| chr3:132670197-132672177  | 10  | UBA5      |
| chr18:163307-180339       | 59  | USP14     |
| chr15:63553714-63559970   | 32  | USP3      |
| chr8:99134234-99156743    | 13  | VPS13B    |
| chr10:27111985-27116345   | 8   | YME1L1    |
| chr6:110210706-110213160  | 12  | CDC40     |
| chrX:96939265-97247839    | 4   | DIAPH2    |
| chr2:229388264-229394497  | 30  | DNER      |

|                           |     |          |
|---------------------------|-----|----------|
| chr9:127507866-127508538  | 5   | FAM129B  |
| chr3:190604127-190609181  | 17  | IL1RAP   |
| chr10:122392302-122417968 | 19  | PLEKHA1  |
| chr18:31931328-31942893   | 4   | TRAPPC8  |
| chr4:48377895-48383784    | 19  | SLAIN2   |
| chr3:53240250-53242242    | 24  | TKT      |
| chr16:89418283-89431326   | 68  | ANKRD11  |
| chr14:67345767-67347453   | 16  | ATP6V1D  |
| chr11:124975095-124977600 | 8   | CCDC15   |
| chr7:24641715-24650712    | 61  | MPP6     |
| chr2:95834350-95835127    | 4   | nogene   |
| chr16:69651902-69652215   | 48  | nogene   |
| chr10:102157018-102158214 | 63  | NOLC1    |
| chr5:139880855-139887511  | 26  | NRG2     |
| chr17:81908567-81909602   | 4   | PCYT2    |
| chr11:34931403-34970286   | 26  | PDHX     |
| chr3:48772954-48807684    | 9   | PRKAR2A  |
| chr9:111578795-111597432  | 17  | PTGR1    |
| chr1:224418259-224424654  | 23  | WDR26    |
| chr20:18159083-18162945   | 7   | CSRP2BP  |
| chr10:97229146-97266125   | 12  | ARHGAP19 |
| chr3:93995873-94003908    | 201 | ARL13B   |
| chr8:65613243-65627433    | 8   | ARMC1    |
| chr16:1625972-1637907     | 30  | CRAMP1L  |
| chr5:42514079-42565944    | 10  | GHR      |
| chr16:68174373-68183366   | 15  | NFATC3   |
| chr2:101009391-101009838  | 21  | nogene   |
| chr10:79349938-79350522   | 10  | nogene   |
| chr20:35716739-35732135   | 37  | RBM39    |
| chr15:56142777-56243287   | 19  | RFX7     |
| chr10:68363589-68364113   | 18  | RUFY2    |
| chr6:169582835-169652008  | 10  | WDR27    |
| chr2:27598066-27608039    | 14  | ZNF512   |
| chr7:66086584-66089695    | 11  | ASL      |
| chr11:46541944-46548500   | 9   | AMBRA1   |
| chr9:37842088-37861235    | 14  | DCAF10   |
| chr20:25306832-25317078   | 21  | ABHD12   |
| chr1:70292387-70306290    | 132 | ANKRD13C |
| chr10:73383174-73383690   | 13  | ANXA7    |
| chr4:36228581-36229645    | 43  | ARAP2    |
| chr12:56644780-56645353   | 5   | ATP5B    |
| chr8:53795646-53801896    | 50  | ATP6V1H  |
| chr3:107728764-107733023  | 11  | BBX      |

|                           |     |          |
|---------------------------|-----|----------|
| chr2:32377587-32380290    | 20  | BIRC6    |
| chr11:116759073-116765446 | 8   | BUD13    |
| chr11:36610080-36636117   | 10  | C11orf74 |
| chr5:37120215-37122488    | 9   | C5orf42  |
| chr3:122362967-122365466  | 20  | CCDC58   |
| chr7:39987598-40002031    | 261 | CDK13    |
| chr2:121347037-121348718  | 6   | CLASP1   |
| chr16:11120614-11126146   | 69  | CLEC16A  |
| chr7:107248395-107258383  | 12  | COG5     |
| chr19:18742909-18753585   | 9   | CRTC1    |
| chr20:49074784-49077064   | 17  | CSE1L    |
| chr9:108948185-108955827  | 6   | CTNNAL1  |
| chr19:1417499-1422396     | 32  | DAZAP1   |
| chr19:1417499-1430362     | 11  | DAZAP1   |
| chr11:674535-688460       | 10  | DEAF1    |
| chr21:37420298-37480826   | 13  | DYRK1A   |
| chr14:88736363-88754671   | 14  | EML5     |
| chr1:51461090-51481314    | 52  | EPS15    |
| chr5:137942874-137949184  | 56  | FAM13B   |
| chr4:151566137-151578076  | 5   | FAM160A1 |
| chr15:48596282-48613092   | 37  | FBN1     |
| chr17:17214984-17217182   | 24  | FLCN     |
| chr1:240329075-240334229  | 87  | FMN2     |
| chr16:53825863-53826491   | 19  | FTO      |
| chr9:124938576-124938866  | 9   | GOLGA1   |
| chr9:86033281-86046572    | 36  | GOLM1    |
| chr15:65554886-65558731   | 7   | HACD3    |
| chr1:32324478-32327677    | 19  | HDAC1    |
| chr15:60453602-60466713   | 29  | ICE2     |
| chr8:56978049-56980197    | 12  | IMPAD1   |
| chr12:267111172-26716242  | 21  | ITPR2    |
| chr10:63380317-63380482   | 11  | JMJD1C   |
| chr2:210104103-210155404  | 7   | KANSL1L  |
| chr13:30251930-30283791   | 26  | KATNAL1  |
| chr1:32030297-32039573    | 6   | KHDRBS1  |
| chr1:170016461-170055436  | 5   | KIFAP3   |
| chr14:103669510-103677523 | 5   | KLC1     |
| chr1:235686948-235697272  | 26  | LYST     |
| chr5:179765325-179771243  | 7   | MAML1    |
| chr14:21503172-21503577   | 10  | METTL3   |
| chr15:41748636-41750615   | 6   | MGA      |
| chr2:134254261-134254644  | 9   | MGAT5    |
| chr8:96243918-96246454    | 6   | MTERF3   |



|                           |    |           |
|---------------------------|----|-----------|
| chr9:126340507-126421948  | 35 | MVB12B    |
| chr8:66599049-66602523    | 6  | MYBL1     |
| chr11:78478437-78493195   | 10 | NARS2     |
| chr19:13073046-13075671   | 55 | NFIX      |
| chr5:36953617-36986301    | 4  | NIPBL     |
| chr21:33550219-33551289   | 12 | nogene    |
| chr8:42517197-42523925    | 15 | nogene    |
| chr3:57679486-57681895    | 8  | nogene    |
| chr2:155906359-155914227  | 17 | nogene    |
| chr15:96285325-96290783   | 5  | NR2F2-AS1 |
| chr13:100368471-100449305 | 14 | PCCA      |
| chr16:70120460-70120719   | 18 | PDPR      |
| chr7:10990702-11013906    | 5  | PHF14     |
| chr9:120869181-120874756  | 10 | PHF19     |
| chr2:86098610-86100172    | 25 | POLR1A    |
| chr22:46175988-46198591   | 8  | PPARA     |
| chr14:103746372-103797518 | 23 | PPP1R13B  |
| chr5:145817893-145820018  | 20 | PRELID2   |
| chr8:47930671-47935058    | 12 | PRKDC     |
| chr3:62157066-62168163    | 13 | PTPRG     |
| chr17:5361207-5378232     | 4  | RABEP1    |
| chr3:51630271-51630931    | 30 | RAD54L2   |
| chr16:67727326-67738035   | 16 | RANBP10   |
| chr8:103644043-103697296  | 25 | RIMS2     |
| chr8:42861744-42870112    | 25 | RNF170    |
| chr17:77142645-77143659   | 5  | SEC14L1   |
| chr6:75647730-75670720    | 4  | SENP6     |
| chr7:100856867-100859161  | 16 | SLC12A9   |
| chr5:55697845-55704434    | 10 | SLC38A9   |
| chr15:75609557-75609994   | 11 | SNUPN     |
| chr2:36877890-36886826    | 23 | STRN      |
| chr8:53979024-54010492    | 40 | TCEA1     |
| chr20:62852722-62854157   | 8  | TCFL5     |
| chr15:56383951-56412436   | 16 | TEX9      |
| chrX:123665641-123686714  | 46 | THOC2     |
| chr7:66941847-66953369    | 12 | TMEM248   |
| chr2:3401776-3424663      | 11 | TRAPPC12  |
| chr22:28094079-28108403   | 13 | TTC28     |
| chr2:178571299-178600667  | 20 | TTN-AS1   |
| chr16:21962459-21972122   | 5  | UQCRC2    |
| chr1:62441487-62442299    | 52 | USP1      |
| chr16:84762988-84775225   | 12 | USP10     |
| chr3:51470928-51483836    | 8  | VPRBP     |

|                           |    |           |
|---------------------------|----|-----------|
| chr1:12400180-12416827    | 26 | VPS13D    |
| chr2:63933672-63944655    | 9  | VPS54     |
| chrX:65488645-65499989    | 12 | ZC3H12B   |
| chr10:45639815-45653059   | 16 | ZFAND4    |
| chr17:49316825-49322508   | 5  | ZNF652    |
| chr19:11903572-11925273   | 24 | ZNF700    |
| chr19:21062605-21098910   | 21 | ZNF714    |
| chr19:53423061-53449638   | 7  | ZNF761    |
| chr15:66535932-66546705   | 56 | ZWILCH    |
| chr16:16016495-16036603   | 8  | ABCC1     |
| chr10:74525255-74600493   | 11 | ADK       |
| chr10:48555462-48583152   | 15 | ARHGAP22  |
| chr17:43049120-43057135   | 12 | BRCA1     |
| chr1:100494817-100499262  | 10 | CDC14A    |
| chr7:39984070-40002031    | 21 | CDK13     |
| chr16:67616744-67629533   | 8  | CTCF      |
| chr5:134763903-134767060  | 20 | DDX46     |
| chr22:20091434-20094795   | 8  | DGCR8     |
| chr10:126970701-127026424 | 16 | DOCK1     |
| chr17:39268826-39281463   | 7  | FBXL20    |
| chr6:78897828-78903110    | 15 | IRAK1BP1  |
| chr1:187254972-187329060  | 5  | LINC01036 |
| chr1:70173464-70189273    | 11 | LRRC40    |
| chr1:113585386-113594560  | 5  | MAGI3     |
| chr20:32825924-32836841   | 15 | MAPRE1    |
| chr10:119838534-119842595 | 5  | MCMBP     |
| chr6:89690672-89694183    | 13 | MDN1      |
| chr2:207620640-207621917  | 4  | METTL21A  |
| chr12:120353298-120364755 | 5  | MSI1      |
| chr8:97699753-97719189    | 8  | MTDH      |
| chr7:44481291-44485284    | 52 | NUDCD3    |
| chr13:28256291-28270866   | 15 | PAN3      |
| chr1:233135012-233139855  | 9  | PCNXL2    |
| chr21:43004325-43010224   | 46 | PKNOX1    |
| chr2:169603641-169607148  | 7  | PPIG      |
| chr2:119932423-119946574  | 16 | PTPN4     |
| chr2:135150368-135153876  | 4  | RAB3GAP1  |
| chr14:35595633-35605709   | 6  | RALGAPA1  |
| chr14:24440782-24442452   | 15 | SDR39U1   |
| chr4:151127617-151128356  | 9  | SH3D19    |
| chr17:72648802-72649268   | 9  | SLC39A11  |
| chr14:34581560-34609742   | 17 | SNX6      |
| chr17:78086502-78087093   | 42 | TNRC6C    |

|                           |     |                 |
|---------------------------|-----|-----------------|
| chr12:49269464-49269976   | 10  | TUBA1C          |
| chr1:32187953-32188124    | 10  | TXLNA           |
| chr20:35366556-35394196   | 32  | UQCC1           |
| chr22:41342528-41343576   | 89  | ZC3H7B          |
| chr19:12046367-12046760   | 5   | ZNF878          |
| chr11:116784854-116787643 | 25  | ZPR1            |
| chrX:77663381-77676298    | 29  | ATRX            |
| chr8:86531154-86537646    | 9   | CPNE3           |
| chr13:49997073-50045232   | 13  | DLEU2           |
| chr19:10805915-10820089   | 8   | DNM2            |
| chr11:19832483-19984247   | 9   | NAV2            |
| chr4:4648976-4649542      | 323 | STX18-AS1       |
| chr13:113495501-113503588 | 9   | TMCO3           |
| chr18:68697225-68701790   | 36  | TMX3            |
| chr15:70682757-70687820   | 11  | UACA            |
| chr14:77464597-77465667   | 79  | AHSA1           |
| chr8:53795646-53829533    | 35  | ATP6V1H         |
| chr7:8003907-8055549      | 9   | GLCCI1          |
| chr1:113590483-113594560  | 9   | MAGI3           |
| chr1:5947103-5952836      | 30  | NPHP4           |
| chr15:63528628-63537156   | 8   | USP3            |
| chr2:85644947-85648853    | 14  | USP39           |
| chr13:95034604-95062859   | 6   | ABCC4           |
| chr2:9535833-9536828      | 165 | ADAM17          |
| chr12:1702885-1772961     | 14  | ADIPOR2         |
| chr2:236036560-236040841  | 15  | AGAP1           |
| chr5:140507784-140513479  | 8   | ANKHD1-EIF4EBP3 |
| chr1:156951572-156955802  | 9   | ARHGEF11        |
| chr6:157084661-157133207  | 7   | ARID1B          |
| chr10:102685815-102705489 | 6   | ARL3            |
| chr8:130358016-130361788  | 28  | ASAP1           |
| chr21:29321220-29329693   | 299 | BACH1           |
| chr3:107710451-107755678  | 16  | BBX             |
| chr11:47137315-47137729   | 19  | C11orf49        |
| chr3:56592969-56594028    | 413 | CCDC66          |
| chr12:69589484-69593613   | 175 | CCT2            |
| chr17:65689128-65750724   | 17  | CEP112          |
| chr19:4430548-4432207     | 31  | CHAF1A          |
| chr16:58574608-58576582   | 10  | CNOT1           |
| chr7:92123733-92131872    | 11  | CYP51A1         |
| chr1:15626668-15638434    | 9   | DDI2            |
| chr8:123019194-123025050  | 11  | DERL1           |
| chr16:58403097-58405110   | 17  | GINS3           |

|                              |     |              |
|------------------------------|-----|--------------|
| chr1:37582222-37587495       | 13  | GNL2         |
| chr9:124899328-124900547     | 15  | GOLGA1       |
| chr8:30700080-30712088       | 11  | GSR          |
| chr22:46316031-46326654      | 14  | GTSE1        |
| chr1:20765376-20773610       | 51  | HP1BP3       |
| chr3:129463559-129469417     | 20  | IFT122       |
| chr17:49038167-49040091      | 10  | IGF2BP1      |
| chr7:23404993-23418824       | 10  | IGF2BP3      |
| chr1:23050386-23059167       | 134 | KDM1A        |
| chr1:35460304-35470960       | 14  | KIAA0319L    |
| chr14:58498782-58508709      | 5   | KIAA0586     |
| chr6:149701778-149702266     | 15  | LATS1        |
| chr4:102664684-102714561     | 4   | MANBA        |
| chr12:116111427-116237705    | 12  | MED13L       |
| chr15:99645560-99675458      | 16  | MEF2A        |
| chr11:12226170-12227131      | 10  | MICAL2       |
| chr5:80775693-80813741       | 9   | MSH3         |
| chr11:47627079-47635571      | 18  | MTCH2        |
| chr13:29222511-29281865      | 4   | MTUS2        |
| chr6:134875094-134879469     | 4   | nogene       |
| chr6:77259666-77273307       | 52  | nogene       |
| chrUn_GL000218v1:74510-75077 | 4   | nogene       |
| chr22:28515626-28528728      | 8   | nogene       |
| chr14:31154569-31155107      | 15  | nogene       |
| chr3:132618633-132631479     | 30  | NPHP3-ACAD11 |
| chr3:132713125-132716909     | 25  | NPHP3-ACAD11 |
| chr5:37323991-37328420       | 13  | NUP155       |
| chr3:183833491-183833825     | 41  | PARL         |
| chr10:26704676-26709768      | 50  | PDSS1        |
| chr11:17131915-17145942      | 42  | PIK3C2A      |
| chr3:138681966-138684803     | 83  | PIK3CB       |
| chr3:138681966-138699095     | 33  | PIK3CB       |
| chr11:70349922-70354452      | 5   | PPFIA1       |
| chr1:84179176-84197824       | 11  | PRKACB       |
| chr4:118313200-118318556     | 65  | PRSS12       |
| chr12:112446275-112456063    | 139 | PTPN11       |
| chr8:37870419-37877551       | 12  | RAB11FIP1    |
| chr1:174304985-174371072     | 15  | RABGAP1L     |
| chr9:127034430-127069356     | 16  | RALGPS1      |
| chr22:35809779-35810004      | 9   | RBFOX2       |
| chr7:151467144-151491014     | 14  | RHEB         |
| chr14:90920205-90947550      | 17  | RPS6KA5      |
| chr12:108545138-108549214    | 67  | SART3        |

|                           |     |          |
|---------------------------|-----|----------|
| chr16:30704063-30704315   | 163 | SRCAP    |
| chr2:152123765-152150229  | 13  | STAM2    |
| chr6:158017203-158033680  | 7   | SYNJ2    |
| chr12:51116314-51118772   | 23  | TFCP2    |
| chr12:51101934-51104203   | 10  | TFCP2    |
| chr7:130170399-130181719  | 15  | TMEM209  |
| chr12:104311289-104321316 | 8   | TXNRD1   |
| chr9:111922848-111926496  | 54  | UGCG     |
| chr7:38789800-38796864    | 109 | VPS41    |
| chr13:26577354-26613058   | 15  | WASF3    |
| chr22:42019310-42020096   | 5   | WBP2NL   |
| chr13:20064450-20083032   | 14  | ZMYM2    |
| chr19:44144556-44150505   | 8   | ZNF234   |
| chr19:14705053-14706773   | 6   | ZNF333   |
| chr11:111836164-111857737 | 6   | ALG9     |
| chr3:37335052-37355187    | 9   | GOLGA4   |
| chr12:122584277-122584990 | 26  | KNTC1    |
| chr12:50454313-50461347   | 71  | LARP4    |
| chr2:95100473-95104730    | 9   | MRPS5    |
| chr12:124483595-124486568 | 4   | NCOR2    |
| chr5:37292878-37299568    | 47  | NUP155   |
| chr8:9706810-9710220      | 15  | TNKS     |
| chr16:84733434-84745673   | 98  | USP10    |
| chr15:78593091-78601387   | 10  | CHRNA5   |
| chr15:64203081-64204949   | 13  | CSNK1G1  |
| chr5:50759642-50763242    | 49  | PARP8    |
| chr1:37582222-37583933    | 9   | GNL2     |
| chr7:23123776-23152209    | 17  | KLHL7    |
| chr5:160010499-160019031  | 9   | TTC1     |
| chr19:11214274-11217391   | 33  | DOCK6    |
| chr4:70827851-70833273    | 9   | GRSF1    |
| chr6:7176654-7189322      | 356 | RREB1    |
| chr14:30702295-30722559   | 12  | SCFD1    |
| chr1:108154982-108161293  | 39  | SLC25A24 |
| chr1:6318491-6349866      | 8   | ACOT7    |
| chr14:103587273-103590429 | 24  | APOPT1   |
| chr1:155347655-155349596  | 14  | ASH1L    |
| chr21:39206107-39229436   | 24  | BRWD1    |
| chr19:1990003-1997463     | 7   | BTBD2    |
| chr20:41512845-41514952   | 97  | CHD6     |
| chr1:92693801-92704744    | 174 | EVI5     |
| chr1:117906505-117918736  | 39  | GDAP2    |
| chr15:41069569-41070547   | 99  | INO80    |

|                           |     |           |
|---------------------------|-----|-----------|
| chr10:122880670-122888723 | 7   | LOC399815 |
| chr3:66405197-66417266    | 7   | LRIG1     |
| chr13:77278757-77296674   | 8   | MYCBP2    |
| chr15:20669467-20671268   | 45  | NBEAP1    |
| chr7:128579998-128609579  | 15  | nogene    |
| chr10:100779497-100781365 | 17  | PAX2      |
| chr9:109050282-109057322  | 14  | TMEM245   |
| chr12:104325336-104327671 | 92  | TXNRD1    |
| chr2:106122969-106166083  | 50  | UXS1      |
| chr15:43333310-43335826   | 7   | ADAL      |
| chr10:102025155-102033339 | 27  | C10orf76  |
| chr19:46608196-46608981   | 16  | CALM3     |
| chr5:65188015-65215487    | 27  | ADAMTS6   |
| chr2:227491546-227524915  | 40  | AGFG1     |
| chr6:106544570-106544933  | 4   | AIM1      |
| chr3:184244600-184245812  | 5   | ALG3      |
| chr16:89305205-89313589   | 52  | ANKRD11   |
| chr21:25891721-25911962   | 11  | APP       |
| chr2:130930951-130946635  | 12  | ARHGEF4   |
| chr6:157084661-157110561  | 138 | ARID1B    |
| chr3:138284430-138290639  | 6   | ARMC8     |
| chr8:130167535-130180880  | 6   | ASAP1     |
| chr20:32366383-32429431   | 5   | ASXL1     |
| chr2:25767582-25771540    | 7   | ASXL2     |
| chr6:106248149-106293106  | 6   | ATG5      |
| chrX:78009101-78020398    | 9   | ATP7A     |
| chr6:80129160-80203212    | 15  | BCKDHB    |
| chr6:56992377-57015353    | 4   | BEND6     |
| chr7:16665436-16682845    | 8   | BZW2      |
| chr19:16509498-16509988   | 27  | C19orf44  |
| chr15:40650300-40652105   | 9   | CASC5     |
| chr1:93210801-93214966    | 11  | CCDC18    |
| chr10:32543299-32623817   | 42  | CCDC7     |
| chr5:618989-647916        | 11  | CEP72     |
| chr22:28710005-28725367   | 6   | CHEK2     |
| chr11:14457783-14458687   | 7   | COPB1     |
| chr4:83261717-83279114    | 8   | COQ2      |
| chr10:68967017-68969121   | 9   | DDX21     |
| chr9:19316416-19316839    | 8   | DENND4C   |
| chr13:42119094-42129632   | 5   | DGKH      |
| chr10:12081471-12091684   | 65  | DHTKD1    |
| chr16:4450399-4455780     | 6   | DNAJA3    |
| chr7:111977131-112004131  | 7   | DOCK4     |

|                           |     |              |
|---------------------------|-----|--------------|
| chr21:36291619-36292233   | 15  | DOPEY2       |
| chr3:32534510-32541206    | 23  | DYNC1LI1     |
| chr11:103399662-103456356 | 8   | DYNC2H1      |
| chr18:45910520-45912456   | 26  | EPG5         |
| chr1:51394380-51448135    | 13  | EPS15        |
| chr11:128781957-128809204 | 8   | FLI1         |
| chr1:240165688-240178068  | 8   | FMN2         |
| chr2:152626524-152629905  | 9   | FMNL2        |
| chr13:49168612-49188633   | 4   | FNDC3A       |
| chr13:49131136-49145935   | 5   | FNDC3A       |
| chr10:130169432-130175089 | 13  | GLRX3        |
| chr2:190895151-190905167  | 8   | GLS          |
| chr12:132780797-132782493 | 8   | GOLGA3       |
| chr8:41609415-41611992    | 14  | GPAT4        |
| chr18:46124821-46128837   | 8   | HAUS1        |
| chrX:53561755-53562929    | 31  | HUWE1        |
| chr6:159991183-160027314  | 9   | IGF2R        |
| chr6:33690916-33691719    | 7   | ITPR3        |
| chr5:138372673-138393372  | 11  | KDM3B        |
| chr12:122577671-122580670 | 74  | KNTC1        |
| chr7:156756392-156763795  | 94  | LMBR1        |
| chr1:173460377-173462454  | 9   | LOC101928673 |
| chr17:82027673-82028311   | 5   | LRRC45       |
| chr14:45231140-45237721   | 5   | MIS18BP1     |
| chr19:6270578-6270759     | 4   | MLLT1        |
| chr11:94459407-94471759   | 9   | MRE11A       |
| chr19:10258221-10258685   | 36  | MRPL4        |
| chr19:13073046-13081855   | 15  | NFIX         |
| chr5:36953617-36972041    | 16  | NIPBL        |
| chr1:169303144-169324500  | 13  | NME7         |
| chr9:127400435-127400778  | 10  | nogene       |
| chr4:34980486-35005121    | 226 | nogene       |
| chr6:10537030-10537425    | 15  | nogene       |
| chr15:79845248-79846856   | 10  | nogene       |
| chr12:102257214-102315490 | 46  | nogene       |
| chr4:13179195-13181146    | 10  | nogene       |
| chr20:34023799-34024010   | 4   | nogene       |
| chr9:128982548-128983550  | 17  | NUP188       |
| chr22:45178237-45178900   | 99  | NUP50        |
| chr4:76124648-76144473    | 75  | NUP54        |
| chrX:68048415-68073299    | 12  | OPHN1        |
| chr18:24196124-24239382   | 17  | OSBPL1A      |
| chr8:100709132-100713181  | 259 | PABPC1       |

|                          |     |            |
|--------------------------|-----|------------|
| chr14:20344931-20352347  | 20  | PARP2      |
| chr5:50759642-50778650   | 10  | PARP8      |
| chr8:17989858-17993619   | 12  | PCM1       |
| chr1:233014664-233025399 | 7   | PCNXL2     |
| chr3:170145422-170178938 | 74  | PHC3       |
| chr6:43582315-43587489   | 6   | POLH       |
| chr5:75534827-75552591   | 9   | POLK       |
| chr2:55577314-55588956   | 5   | PPP4R3B    |
| chr11:68558565-68596218  | 8   | PPP6R3     |
| chr4:86686709-86693674   | 16  | PTPN13     |
| chr17:76287191-76304941  | 47  | QRICH2     |
| chr9:131650128-131650949 | 4   | RAPGEF1    |
| chr1:32668224-32672901   | 112 | RBBP4      |
| chr11:66643449-66644140  | 12  | RBM14-RBM4 |
| chr13:79370944-79371930  | 5   | RBM26      |
| chr1:2395783-2397220     | 9   | RER1       |
| chr1:40190771-40202614   | 65  | RLF        |
| chr1:32942251-32949774   | 5   | RNF19B     |
| chr1:213077695-213129889 | 15  | RPS6KC1    |
| chr11:77722054-77725699  | 12  | RSF1       |
| chr3:134188836-134202874 | 12  | RYK        |
| chr8:118580714-118580893 | 16  | SAMD12     |
| chr8:30069641-30070059   | 13  | SARAF      |
| chr5:134697125-134705437 | 38  | SEC24A     |
| chr20:44506826-44514040  | 9   | SERINC3    |
| chr12:46229152-46229639  | 29  | SLC38A1    |
| chr3:27383152-27424152   | 16  | SLC4A7     |
| chrX:71061027-71062949   | 9   | SNX12      |
| chr6:85557975-85572374   | 16  | SNX14      |
| chr1:98691074-98701903   | 62  | SNX7       |
| chr7:2271849-2278305     | 19  | SNX8       |
| chr5:172055587-172057473 | 13  | STK10      |
| chr1:108782421-108794907 | 5   | STXBP3     |
| chr1:108796233-108798237 | 8   | STXBP3     |
| chr6:45003652-45106006   | 26  | SUPT3H     |
| chr6:10935057-10958875   | 4   | SYCP2L     |
| chr10:94497054-94500327  | 9   | TBC1D12    |
| chr20:31757406-31760179  | 5   | TPX2       |
| chr2:201407402-201420706 | 4   | TRAK2      |
| chr7:99908581-99909660   | 28  | TRIM4      |
| chr19:34451980-34464131  | 103 | UBA2       |
| chr2:23958300-23977075   | 104 | UBXN2A     |
| chr2:23982895-23984831   | 46  | UBXN2A     |



|                           |     |            |
|---------------------------|-----|------------|
| chr12:101311718-101312276 | 4   | UTP20      |
| chr12:57945627-57953689   | 16  | XRCC6BP1   |
| chr7:55911615-55923699    | 6   | ZNF713     |
| chr11:86556552-86559823   | 141 | ME3        |
| chr10:11481769-11485911   | 84  | USP6NL     |
| chr8:63175330-63187745    | 38  | YTHDF3     |
| chr1:53800692-53832591    | 16  | NDC1       |
| chr18:13001456-13019206   | 24  | CEP192     |
| chr9:134690911-134701333  | 36  | COL5A1     |
| chr1:197583151-197658369  | 18  | DENND1B    |
| chr4:53399729-53428183    | 99  | FIP1L1     |
| chr2:239236592-239352918  | 70  | HDAC4      |
| chr1:39957086-39958825    | 21  | MFSD2A     |
| chr20:3910576-3912634     | 28  | PANK2      |
| chr17:18347495-18348440   | 4   | SHMT1      |
| chr2:15415545-15427794    | 19  | NBAS       |
| chr7:151781151-151786541  | 33  | PRKAG2     |
| chr16:2933715-2933979     | 23  | FLYWCH1    |
| chr10:73817022-73848082   | 9   | CAMK2G     |
| chr1:179986168-180006567  | 37  | CEP350     |
| chr12:31413435-31426424   | 13  | DENND5B    |
| chr10:92531747-92537550   | 107 | IDE        |
| chr12:50435487-50453672   | 4   | LARP4      |
| chr14:70592879-70597777   | 16  | MED6       |
| chr10:68145474-68161752   | 12  | MYPN       |
| chr8:123378624-123378898  | 16  | nogene     |
| chr6:3006467-3016985      | 11  | NQO2       |
| chr11:85996825-86031611   | 174 | PICALM     |
| chr6:149512154-149541586  | 18  | PPIL4      |
| chr2:20307977-20327378    | 99  | PUM2       |
| chr5:171158333-171170203  | 8   | RANBP17    |
| chr2:86740926-86773435    | 21  | RMND5A     |
| chr17:81280608-81284895   | 123 | SLC38A10   |
| chr8:47279861-47407961    | 9   | SPIDR      |
| chr3:143032783-143038960  | 6   | U2SURP     |
| chr13:19851354-19852190   | 47  | ZMYM5      |
| chr19:19878480-19880146   | 37  | ZNF253     |
| chr12:53018797-53020026   | 7   | EIF4B      |
| chr12:125102678-125118765 | 29  | AACS       |
| chr10:43158714-43176032   | 15  | CSGALNACT2 |
| chr20:63928339-63931022   | 19  | DNAJC5     |
| chr7:65970281-65976202    | 13  | GUSB       |
| chr2:61112521-61118116    | 20  | KIAA1841   |

|                           |     |          |
|---------------------------|-----|----------|
| chr10:27169943-27173259   | 47  | MASTL    |
| chr4:120710308-120811449  | 6   | PRDM5    |
| chr5:176313690-176337146  | 9   | SIMC1    |
| chr1:167772274-167773368  | 11  | MPZL1    |
| chr20:5189066-5190757     | 5   | CDS2     |
| chr10:14928015-14935564   | 21  | DCLRE1C  |
| chr1:39163035-39163309    | 14  | nogene   |
| chr10:112888734-112906213 | 23  | nogene   |
| chr7:92457551-92492286    | 9   | nogene   |
| chr8:100225172-100231288  | 21  | SPAG1    |
| chr2:168138087-168167407  | 24  | STK39    |
| chr11:755878-760253       | 36  | TALDO1   |
| chr9:129807187-129809032  | 9   | TOR1B    |
| chr2:3387619-3401893      | 70  | TRAPPC12 |
| chr8:99575657-99585517    | 38  | VPS13B   |
| chr15:65485098-65490299   | 19  | DPP8     |
| chr1:235240312-235260752  | 18  | ARID4B   |
| chr1:227213135-227317246  | 5   | CDC42BPA |
| chr11:9414254-9417148     | 8   | IPO7     |
| chr7:6387211-6392041      | 59  | RAC1     |
| chr10:11979056-12014184   | 128 | UPF2     |
| chr19:32352828-32360618   | 40  | ZNF507   |
| chr16:3738558-3745354     | 9   | CREBBP   |
| chr2:20774809-20801465    | 33  | LDAH     |
| chr9:125669817-125672643  | 86  | MAPKAP1  |
| chr8:47700402-47702015    | 119 | SPIDR    |
| chr14:102376649-102376940 | 10  | TECPR2   |
| chr2:222916318-222919202  | 7   | ACSL3    |
| chr7:151116792-151123886  | 45  | AGAP3    |
| chr10:4830674-4847660     | 27  | AKR1E2   |
| chr11:108267170-108279608 | 6   | ATM      |
| chr18:79126266-79176907   | 31  | ATP9B    |
| chr7:16685904-16697061    | 47  | BZW2     |
| chr19:10904950-10909207   | 57  | CARM1    |
| chr12:96297626-96298983   | 9   | CDK17    |
| chr17:15596513-15598653   | 10  | CDRT1    |
| chr18:74505848-74508928   | 5   | CNDP2    |
| chr1:100230732-100240884  | 4   | DBT      |
| chr11:61311783-61314486   | 9   | DDB1     |
| chr11:684897-688460       | 8   | DEAF1    |
| chr1:197595207-197772932  | 9   | DENND1B  |
| chr15:66306823-66308844   | 35  | DIS3L    |
| chr10:68437010-68446413   | 10  | DNA2     |

|                           |     |          |
|---------------------------|-----|----------|
| chr20:32788853-32792770   | 70  | DNMT3B   |
| chr10:126970701-126996883 | 9   | DOCK1    |
| chr6:83132175-83142046    | 8   | DOPEY1   |
| chr10:119073440-119073937 | 30  | EIF3A    |
| chr3:71690009-71710484    | 8   | EIF4E3   |
| chr12:1027398-1028572     | 5   | ERC1     |
| chr7:158788003-158799072  | 691 | ESYT2    |
| chr16:81351582-81377702   | 35  | GAN      |
| chr16:74503530-74508925   | 11  | GLG1     |
| chr1:28691584-28704329    | 7   | GMEB1    |
| chr1:155777621-155784089  | 46  | GON4L    |
| chr17:7313028-7314597     | 9   | GPS2     |
| chr13:27427091-27430621   | 5   | GTF3A    |
| chr14:31122913-31133675   | 4   | HECTD1   |
| chr12:112178930-112179397 | 12  | HECTD4   |
| chr10:68033964-68073686   | 10  | HERC4    |
| chrX:118766529-118776511  | 23  | IL13RA1  |
| chrX:53217142-53218398    | 16  | KDM5C    |
| chr19:34330188-34339992   | 11  | KIAA0355 |
| chr2:23639138-23642850    | 12  | KLHL29   |
| chr16:25054818-25140247   | 6   | LCMT1    |
| chr6:69737941-69790472    | 12  | LMBRD1   |
| chr8:132622610-132661627  | 8   | LRRC6    |
| chr5:109729341-109755456  | 10  | MAN2A1   |
| chr14:75032067-75038412   | 6   | MLH3     |
| chr11:94429910-94461036   | 25  | MRE11A   |
| chr11:94429910-94456338   | 24  | MRE11A   |
| chr12:124426621-124449867 | 12  | NCOR2    |
| chr4:177353307-177358258  | 11  | NEIL3    |
| chr1:77916054-77918273    | 8   | NEXN     |
| chr20:35680736-35681981   | 9   | NFS1     |
| chr1:160017610-160021071  | 12  | nogene   |
| chr1:112877729-112885053  | 7   | nogene   |
| chr15:51244629-51281307   | 10  | nogene   |
| chr11:96130348-96136347   | 9   | nogene   |
| chr6:157206248-157206842  | 6   | nogene   |
| chr7:44392296-44404583    | 32  | NUDCD3   |
| chr16:56748233-56758655   | 17  | NUP93    |
| chr7:44693824-44694576    | 20  | OGDH     |
| chr7:24870731-24872069    | 8   | OSBPL3   |
| chr13:24455016-24460136   | 9   | PARP4    |
| chr19:19564932-19570833   | 6   | PBX4     |
| chr6:78997413-79019159    | 5   | PHIP     |

|                           |    |          |
|---------------------------|----|----------|
| chr3:111903965-111920419  | 10 | PHLDB2   |
| chr3:138733360-138759359  | 5  | PIK3CB   |
| chr1:151231670-151232703  | 31 | PIP5K1A  |
| chr2:158533179-158621421  | 25 | PKP4     |
| chr19:4859589-4861411     | 13 | PLIN3    |
| chr1:202427039-202449171  | 18 | PPP1R12B |
| chrX:345515-361590        | 5  | PPP2R3B  |
| chr2:119809836-119885882  | 6  | PTPN4    |
| chr7:105491539-105506273  | 19 | PUS7     |
| chr3:49967332-49975392    | 10 | RBM6     |
| chr6:111405469-111472140  | 7  | REV3L    |
| chr12:106783996-106825820 | 15 | RIC8B    |
| chr19:47143493-47180303   | 14 | SAE1     |
| chr14:30628208-30653588   | 38 | SCFD1    |
| chr7:140355667-140369682  | 54 | SLC37A3  |
| chr3:27394517-27403384    | 11 | SLC4A7   |
| chr13:29535818-29536202   | 24 | SLC7A1   |
| chr16:18845428-18850467   | 15 | SMG1     |
| chr17:64583460-64606640   | 43 | SMURF2   |
| chr14:50182462-50188700   | 4  | SOS2     |
| chr6:42066311-42068607    | 10 | TAF8     |
| chr22:46974289-46997709   | 30 | TBC1D22A |
| chr8:93786222-93791319    | 74 | TMEM67   |
| chr21:37108391-37140673   | 7  | TTC3     |
| chr7:157201720-157231327  | 76 | UBE3C    |
| chr11:18546879-18566482   | 6  | UEVLD    |
| chr4:75804133-75805303    | 25 | USO1     |
| chr21:15808808-15831629   | 8  | USP25    |
| chr1:77711746-77715868    | 61 | USP33    |
| chr6:99476142-99510230    | 21 | USP45    |
| chr16:8923214-8930397     | 10 | USP7     |
| chr6:43549488-43567354    | 51 | XPO5     |
| chr16:31884497-31885256   | 11 | ZNF267   |
| chr11:108297286-108304852 | 30 | ATM      |
| chr6:35637013-35642843    | 25 | FKBP5    |
| chr10:92531747-92559215   | 11 | IDE      |
| chr20:3896863-3912634     | 9  | PANK2    |
| chr3:67495797-67609596    | 10 | SUCLG2   |
| chr3:17562018-17623913    | 6  | TBC1D5   |
| chr6:43553372-43567354    | 23 | XPO5     |
| chr16:70269617-70282784   | 4  | AARS     |
| chr7:17309935-17335786    | 13 | AHR      |
| chr16:71745143-71745614   | 28 | AP1G1    |

|                           |     |          |
|---------------------------|-----|----------|
| chr10:87770951-87776427   | 8   | ATAD1    |
| chr5:37114959-37122488    | 15  | C5orf42  |
| chr1:112653597-112659779  | 376 | CAPZA1   |
| chr17:39490556-39526316   | 7   | CDK12    |
| chr7:90726566-90863269    | 18  | CDK14    |
| chr13:26262549-26353880   | 6   | CDK8     |
| chr2:101257790-101266879  | 6   | CNOT11   |
| chr14:101975711-101980550 | 5   | DYNC1H1  |
| chr11:47752915-47754664   | 117 | FNBP4    |
| chr16:74456648-74459789   | 26  | GLG1     |
| chr10:68032777-68044563   | 12  | HERC4    |
| chr6:53896497-53904462    | 11  | LRRC1    |
| chr3:15414020-15415942    | 14  | METTL6   |
| chr10:93310019-93310643   | 13  | MYOF     |
| chr14:71413947-71467247   | 20  | nogene   |
| chr1:229460610-229463676  | 16  | NUP133   |
| chr11:3768580-3782145     | 12  | NUP98    |
| chr4:48832619-48848446    | 17  | OCIAD1   |
| chr2:200931338-200937966  | 10  | ORC2     |
| chr11:74604691-74620089   | 46  | POLD3    |
| chr9:131436619-131447804  | 6   | PRRC2B   |
| chr10:16484336-16484816   | 7   | PTER     |
| chr8:94399413-94411315    | 12  | RAD54B   |
| chr3:196475230-196488683  | 12  | RNF168   |
| chr3:50175095-50175416    | 26  | SEMA3F   |
| chr12:131778064-131778330 | 12  | SFSWAP   |
| chr17:39651751-39653750   | 9   | STARD3   |
| chr3:196058283-196060247  | 19  | TFRC     |
| chr2:229836847-229840927  | 10  | TRIP12   |
| chr2:28861117-28865119    | 15  | TRMT61B  |
| chr15:42783418-42840433   | 12  | TTBK2    |
| chr6:169582835-169689308  | 8   | WDR27    |
| chr17:1364858-1365058     | 35  | YWHAE    |
| chr21:29061495-29062415   | 14  | CCT8     |
| chr17:39423326-39427790   | 30  | MED1     |
| chr12:5159273-5171889     | 16  | nogene   |
| chr6:169658275-169662424  | 9   | WDR27    |
| chr17:4112608-4117166     | 8   | ZZEF1    |
| chr14:61726705-61727655   | 15  | HIF1A    |
| chr11:120406117-120409450 | 56  | ARHGEF12 |
| chr12:6581043-6581814     | 10  | CHD4     |
| chr1:77783237-77815231    | 18  | FAM73A   |
| chr13:23864140-23886506   | 10  | MIPEP    |

|                           |     |          |
|---------------------------|-----|----------|
| chr15:78886140-78887349   | 25  | MORF4L1  |
| chr10:125088190-125122868 | 15  | nogene   |
| chr7:105160506-105169265  | 23  | SRPK2    |
| chr2:112501205-112503181  | 94  | TTL      |
| chr15:50747494-50748870   | 85  | SPPL2A   |
| chr2:219501475-219502441  | 7   | GMPPA    |
| chr7:128629393-128631869  | 9   | nogene   |
| chr6:144490070-144493456  | 51  | UTRN     |
| chr15:100254135-100331054 | 15  | ADAMTS17 |
| chr3:138263738-138290639  | 10  | ARMC8    |
| chr3:32708669-32717237    | 11  | CNOT10   |
| chr13:110429884-110501784 | 15  | COL4A2   |
| chr4:2625261-2639859      | 45  | FAM193A  |
| chr1:212863724-212872818  | 43  | FLVCR1   |
| chr2:152549020-152561035  | 5   | FMNL2    |
| chr4:48602019-48609823    | 8   | FRYL     |
| chr9:83768817-83788678    | 26  | GKAP1    |
| chr9:4117767-4125941      | 28  | GLIS3    |
| chr14:61721508-61721823   | 76  | HIF1A    |
| chr1:61762857-61766473    | 10  | INADL    |
| chr9:7011697-7049200      | 11  | KDM4C    |
| chr7:103128482-103128792  | 19  | NAPEPLD  |
| chr14:75120509-75124223   | 10  | NEK9     |
| chr16:57059061-57059445   | 10  | NLRC5    |
| chr1:169230717-169298763  | 12  | NME7     |
| chr3:130918899-130919319  | 8   | nogene   |
| chr10:121960357-121974081 | 4   | NSMCE4A  |
| chr18:24225041-24239382   | 38  | OSBPL1A  |
| chr14:71019008-71036157   | 8   | PCNX     |
| chr4:39898388-39925933    | 10  | PDS5A    |
| chr3:170145422-170149244  | 307 | PHC3     |
| chr1:151239954-151240259  | 6   | PIP5K1A  |
| chr3:170291853-170299110  | 45  | PRKCI    |
| chr2:152662602-152669270  | 25  | PRPF40A  |
| chr14:73147794-73160138   | 31  | PSEN1    |
| chr1:31910037-31919658    | 21  | PTP4A2   |
| chr4:13332384-13381594    | 9   | RAB28    |
| chr1:64777622-64781571    | 14  | RAVER2   |
| chr16:70538322-70544533   | 9   | SF3B3    |
| chr8:98706466-98728621    | 20  | STK3     |
| chr17:31947616-31976614   | 12  | SUZ12    |
| chrX:123696020-123712908  | 21  | THOC2    |
| chr12:26979783-26990627   | 23  | TM7SF3   |

|                           |     |           |
|---------------------------|-----|-----------|
| chr9:109033306-109064567  | 9   | TMEM245   |
| chr20:35366556-35382025   | 14  | UQCC1     |
| chr4:1348089-1366431      | 11  | UVSSA     |
| chr1:12299201-12304728    | 14  | VPS13D    |
| chr14:100337061-100343387 | 10  | WARS      |
| chr20:47290186-47294779   | 10  | ZMYND8    |
| chr7:134137022-134163540  | 51  | LRGUK     |
| chr14:45154696-45159280   | 24  | FANCM     |
| chr8:23225804-23226123    | 5   | LOC389641 |
| chr1:40260838-40272035    | 14  | ZMPSTE24  |
| chr5:150541569-150545486  | 82  | NDST1     |
| chr16:56484760-56501025   | 11  | BBS2      |
| chrX:1288518-1290509      | 10  | CSF2RA    |
| chr6:73519336-73520056    | 49  | EEF1A1    |
| chr1:178776681-178785607  | 31  | RALGPS2   |
| chr18:49363160-49430427   | 8   | DYM       |
| chr1:45659027-45661225    | 19  | GPBP1L1   |
| chr5:65758566-65758826    | 19  | NLN       |
| chr10:13280975-13295606   | 33  | PHYH      |
| chr3:134202729-134222539  | 9   | RYK       |
| chr3:37379041-37416724    | 6   | C3orf35   |
| chr10:35032434-35049765   | 9   | CUL2      |
| chr12:121532805-121534590 | 17  | KDM2B     |
| chr9:34286616-34297114    | 16  | KIF24     |
| chr17:47664158-47670832   | 31  | KPNB1     |
| chr2:8908620-8958642      | 153 | MBOAT2    |
| chr1:53803927-53806517    | 9   | NDC1      |
| chr5:131504625-131521521  | 11  | RAPGEF6   |
| chr1:179337836-179341310  | 55  | SOAT1     |
| chr5:88202961-88240916    | 9   | TMEM161B  |
| chr20:35842572-35863400   | 7   | PHF20     |
| chr7:43881658-43887816    | 6   | URGCP     |
| chr9:19423861-19435084    | 25  | ACER2     |
| chr2:157760879-157780600  | 4   | ACVR1     |
| chr7:91973710-91980958    | 7   | AKAP9     |
| chr12:105203702-105211317 | 9   | APPL2     |
| chr8:130290000-130361771  | 17  | ASAP1     |
| chr11:46788680-46790583   | 16  | CKAP5     |
| chr1:230663140-230675124  | 107 | COG2      |
| chr20:34093674-34105545   | 4   | EIF2S2    |
| chr10:124681606-124706887 | 48  | FAM53B    |
| chr7:65960951-65967907    | 4   | GUSB      |
| chr7:43396813-43407731    | 4   | HECW1     |

|                           |     |           |
|---------------------------|-----|-----------|
| chr12:110128949-110132636 | 21  | IFT81     |
| chr1:226265532-226301205  | 23  | LIN9      |
| chr18:36248921-36260175   | 4   | MOCOS     |
| chr8:144179454-144180523  | 4   | MROH1     |
| chr1:236803427-236816543  | 33  | MTR       |
| chr20:58999342-58999809   | 48  | nogene    |
| chr11:66795041-66795396   | 9   | nogene    |
| chr17:47054117-47072559   | 10  | nogene    |
| chr20:58693736-58701158   | 4   | NPEPL1    |
| chr11:65287715-65295990   | 24  | POLA2     |
| chr13:50927406-50934999   | 16  | RNASEH2B  |
| chr3:185600764-185613408  | 15  | SENP2     |
| chr3:27379248-27403384    | 29  | SLC4A7    |
| chr1:28567293-28571900    | 8   | TRNAU1AP  |
| chr8:102342472-102361626  | 106 | UBR5      |
| chr17:21017941-21028674   | 34  | USP22     |
| chr10:1080010-1086357     | 20  | WDR37     |
| chr20:21354788-21368590   | 49  | XRN2      |
| chr1:203816925-203840374  | 9   | ZC3H11A   |
| chr15:80120327-80122800   | 340 | ZFAND6    |
| chr18:45899403-45910742   | 11  | EPG5      |
| chr22:31701655-31704726   | 11  | PRR14L    |
| chr3:57831382-57849816    | 7   | SLMAP     |
| chr7:66950951-66955851    | 13  | TMEM248   |
| chr1:92605306-92607727    | 80  | EVI5      |
| chr2:135709432-135710231  | 85  | R3HDM1    |
| chr9:137175499-137175707  | 17  | ANAPC2    |
| chr10:27012881-27017792   | 8   | ANKRD26   |
| chr11:90210535-90218184   | 35  | CHORDC1   |
| chr6:142820032-142837047  | 10  | HIVEP2    |
| chr20:36660336-36666392   | 8   | NDRG3     |
| chr17:51166826-51170049   | 9   | NME1-NME2 |
| chr6:126173395-126174911  | 10  | nogene    |
| chr4:523458-533981        | 8   | PIGG      |
| chr12:68748075-68752190   | 5   | SLC35E3   |
| chr1:108752256-108760085  | 21  | STXBP3    |
| chr17:31966146-31988497   | 8   | SUZ12     |
| chr5:907129-911996        | 8   | TRIP13    |
| chr17:41378955-41379731   | 30  | KRT34     |
| chr1:247864704-247868063  | 21  | TRIM58    |
| chr5:65224319-65242206    | 14  | ADAMTS6   |
| chr11:103280347-103307831 | 14  | DYNC2H1   |
| chr11:47722975-47723316   | 25  | FNBP4     |



|                           |     |          |
|---------------------------|-----|----------|
| chr19:33462994-33493337   | 6   | PEPD     |
| chr2:37279745-37290999    | 9   | PRKD3    |
| chr6:128322038-128322310  | 32  | PTPRK    |
| chr7:77765494-77778814    | 16  | RSBN1L   |
| chr15:90217438-90219891   | 35  | SEMA4B   |
| chr6:43546570-43553503    | 8   | XPO5     |
| chr13:20019546-20036909   | 10  | ZMYM2    |
| chr11:108235669-108245026 | 23  | ATM      |
| chr5:109755328-109774965  | 17  | MAN2A1   |
| chr20:35069295-35078174   | 48  | TRPC4AP  |
| chr15:39763820-39777910   | 8   | FSIP1    |
| chr1:156009267-156009650  | 10  | SSR2     |
| chr1:155668626-155680456  | 9   | YY1AP1   |
| chr5:123575728-123588153  | 7   | CSNK1G3  |
| chr5:83104909-83258677    | 7   | XRCC4    |
| chr1:26257596-26259802    | 225 | CEP85    |
| chr1:53594107-53600278    | 14  | GLIS1    |
| chr10:87062655-87068157   | 6   | GLUD1    |
| chr15:90452774-90456315   | 5   | IQGAP1   |
| chr18:6080880-6093528     | 8   | L3MBTL4  |
| chr4:109527321-109533685  | 13  | SEC24B   |
| chr8:15650696-15662296    | 6   | TUSC3    |
| chr5:113524980-113526785  | 17  | YTHDC2   |
| chr1:32627507-32634110    | 24  | ZBTB8OS  |
| chr3:136464641-136464988  | 6   | STAG1    |
| chr13:98409337-98412034   | 10  | FARP1    |
| chr1:145405097-145420756  | 21  | NBPF20   |
| chr7:135584831-135587992  | 12  | NUP205   |
| chr8:140830471-140890769  | 430 | PTK2     |
| chr2:135129994-135153876  | 9   | RAB3GAP1 |
| chr17:62520772-62524331   | 49  | TLK2     |
| chr10:96544075-96576829   | 153 | TM9SF3   |
| chr20:34280521-34281165   | 12  | AHCY     |
| chr11:46493607-46508370   | 274 | AMBRA1   |
| chr12:31689006-31719356   | 11  | AMN1     |
| chr8:38114191-38121149    | 60  | ASH2L    |
| chr15:44331987-44338317   | 40  | CASC4    |
| chr16:23392379-23417121   | 15  | COG7     |
| chr13:113236822-113239551 | 7   | CUL4A    |
| chr1:85350414-85361500    | 12  | DDAH1    |
| chr10:12118748-12120267   | 95  | DHTKD1   |
| chr18:49331863-49333853   | 98  | DYM      |
| chr15:74671454-74675142   | 310 | EDC3     |

|                           |     |              |
|---------------------------|-----|--------------|
| chr1:77801330-77866391    | 9   | FAM73A       |
| chr2:241407536-241413421  | 69  | FARP2        |
| chr2:169555123-169557297  | 103 | FASTKD1      |
| chr11:77938650-77941251   | 636 | INTS4        |
| chr18:62282261-62287467   | 21  | KIAA1468     |
| chr4:103436934-103552602  | 6   | LOC101929448 |
| chr4:47875126-47885999    | 11  | NFXL1        |
| chr7:94061455-94061864    | 10  | nogene       |
| chr9:97139852-97144760    | 18  | nogene       |
| chr11:62625031-62625539   | 7   | nogene       |
| chr11:70354300-70362488   | 46  | PPFIA1       |
| chr5:103146526-103159328  | 9   | PPIP5K2      |
| chr11:76355617-76365972   | 8   | PRKRIR       |
| chr12:123498543-123499536 | 37  | RILPL1       |
| chr5:78475503-78483051    | 9   | SCAMP1       |
| chr2:109574580-109593119  | 29  | 10-Sep       |
| chr3:47067069-47098081    | 7   | SETD2        |
| chr7:96208837-96234917    | 10  | SLC25A13     |
| chr11:93148652-93168171   | 8   | SLC36A4      |
| chr3:67400730-67409031    | 9   | SUCLG2       |
| chr17:37538323-37540543   | 5   | SYNRG        |
| chr8:140397619-140405698  | 257 | TRAPPC9      |
| chr9:33960825-33989126    | 10  | UBAP2        |
| chr3:179754731-179765848  | 9   | USP13        |
| chr17:42787277-42788797   | 14  | WNK4         |
| chr16:89733481-89737905   | 29  | ZNF276       |
| chr19:12524795-12528696   | 11  | ZNF564       |
| chr6:18159882-18171479    | 47  | KDM1B        |
| chr13:95115921-95188542   | 17  | ABCC4        |
| chr3:197130526-197142768  | 12  | DLG1         |
| chr10:34331116-34360259   | 37  | PARD3        |
| chr17:82870223-82893632   | 43  | TBCD         |
| chr7:122113117-122133741  | 125 | AASS         |
| chr3:58256561-58274815    | 7   | ABHD6        |
| chr2:203411284-203427269  | 7   | ABI2         |
| chr17:37328838-37330425   | 9   | ACACA        |
| chr2:9509978-9527954      | 29  | ADAM17       |
| chr15:100325073-100331054 | 8   | ADAMTS17     |
| chr21:45180329-45185091   | 18  | ADARB1       |
| chr21:45118563-45128573   | 5   | ADARB1       |
| chr1:31741623-31742217    | 11  | ADGRB2       |
| chr20:50902016-50904001   | 8   | ADNP         |
| chr22:25678815-25695214   | 30  | ADRBK2       |

|                           |     |          |
|---------------------------|-----|----------|
| chr12:19473247-19493986   | 20  | AEBP2    |
| chr12:19462509-19500221   | 274 | AEBP2    |
| chr2:27057302-27059404    | 21  | AGBL5    |
| chr1:35901947-35902337    | 23  | AGO1     |
| chr8:140572811-140605914  | 27  | AGO2     |
| chr1:36039789-36040441    | 29  | AGO3     |
| chr8:6724869-6732650      | 39  | AGPAT5   |
| chr1:27552891-27603494    | 10  | AHDC1    |
| chr6:135453340-135457713  | 14  | AHI1     |
| chr9:4718418-4722625      | 12  | AK3      |
| chr17:19920035-19931978   | 5   | AKAP10   |
| chr10:4830674-4847299     | 14  | AKR1E2   |
| chr1:243563719-243843282  | 28  | AKT3     |
| chr10:95613741-95621251   | 9   | ALDH18A1 |
| chr5:126568258-126570859  | 43  | ALDH7A1  |
| chr11:78109441-78121174   | 21  | ALG8     |
| chr11:111836164-111853736 | 7   | ALG9     |
| chr16:89418283-89440210   | 7   | ANKRD11  |
| chr19:32631401-32640385   | 27  | ANKRD27  |
| chr3:43549719-43555469    | 5   | ANO10    |
| chr3:43576691-43577261    | 7   | ANO10    |
| chr4:79977620-80018976    | 9   | ANTXR2   |
| chr10:73398180-73400857   | 8   | ANXA7    |
| chr2:200615970-200627449  | 8   | AOX1     |
| chr5:115866669-115895158  | 43  | AP3S1    |
| chr11:43326506-43328893   | 9   | API5     |
| chr2:68490189-68515736    | 20  | APLF     |
| chr14:74683295-74692328   | 7   | AREL1    |
| chr22:42817141-42817857   | 10  | ARFGAP3  |
| chr10:31839636-31852597   | 11  | ARHGAP12 |
| chr11:120465236-120467308 | 7   | ARHGEF12 |
| chr5:73911274-73923164    | 6   | ARHGEF28 |
| chr5:73794401-73832459    | 4   | ARHGEF28 |
| chr6:156829226-156935576  | 28  | ARID1B   |
| chr3:93995877-94003908    | 11  | ARL13B   |
| chr5:78964415-78985558    | 17  | ARSB     |
| chr8:130057953-130061069  | 24  | ASAP1    |
| chr8:130134295-130169067  | 16  | ASAP1    |
| chr8:123344883-123361646  | 9   | ATAD2    |
| chr6:30627459-30628430    | 8   | ATAT1    |
| chr3:11331339-11364734    | 6   | ATG7     |
| chr3:194433771-194454392  | 30  | ATP13A3  |
| chr22:45700281-45729590   | 63  | ATXN10   |

|                           |     |          |
|---------------------------|-----|----------|
| chr12:111513356-111518427 | 9   | ATXN2    |
| chr17:8204849-8205390     | 10  | AURKB    |
| chr18:31630958-31658089   | 7   | B4GALT6  |
| chr21:29326058-29329693   | 134 | BACH1    |
| chr2:214745066-214797117  | 38  | BARD1    |
| chr7:33604864-33637881    | 5   | BBS9     |
| chr7:33146241-33155702    | 84  | BBS9     |
| chr2:32575155-32594060    | 8   | BIRC6    |
| chr2:32439507-32445668    | 5   | BIRC6    |
| chr17:67928354-67932019   | 17  | BPTF     |
| chrX:80791853-80793772    | 145 | BRWD3    |
| chr7:16694833-16697061    | 33  | BZW2     |
| chr11:76526461-76528466   | 54  | C11orf30 |
| chr11:76463820-76472840   | 219 | C11orf30 |
| chr16:9102983-9103259     | 13  | C16orf72 |
| chr11:74074252-74078717   | 7   | C2CD3    |
| chr2:47151257-47153016    | 8   | C2orf61  |
| chr5:37221323-37224740    | 7   | C5orf42  |
| chr5:37213558-37224740    | 15  | C5orf42  |
| chr6:24714317-24716324    | 10  | C6orf62  |
| chr7:81959274-81965665    | 4   | CACNA2D1 |
| chr7:82064303-82117173    | 5   | CACNA2D1 |
| chr6:17421554-17463073    | 5   | CAP2     |
| chr9:75016267-75017448    | 89  | CARNMT1  |
| chr11:119232447-119232695 | 86  | CBL      |
| chr1:93256334-93264901    | 16  | CCDC18   |
| chr10:32472480-32518505   | 10  | CCDC7    |
| chr1:207757013-207770362  | 21  | CD46     |
| chr1:227160542-227199652  | 8   | CDC42BPA |
| chr5:131385542-131391108  | 8   | CDC42SE2 |
| chr3:45089053-45091538    | 59  | CDCP1    |
| chr1:1636896-1703940      | 33  | CDK11B   |
| chr2:201854873-201890927  | 6   | CDK15    |
| chr9:120539040-120568388  | 14  | CDK5RAP2 |
| chr18:12999420-13042350   | 8   | CEP192   |
| chr5:98885577-98889238    | 7   | CHD1     |
| chr22:28699837-28719485   | 7   | CHEK2    |
| chr2:86507478-86510479    | 12  | CHMP3    |
| chr14:24211410-24211829   | 6   | CHMP4A   |
| chr9:33270622-33278225    | 9   | CHMP5    |
| chr10:124038514-124046724 | 58  | CHST15   |
| chr3:33581820-33604209    | 14  | CLASP2   |
| chr3:33606590-33612071    | 11  | CLASP2   |

|                           |     |           |
|---------------------------|-----|-----------|
| chr3:33632291-33663515    | 5   | CLASP2    |
| chr2:55206269-55209831    | 5   | CLHC1     |
| chr15:68211262-68218650   | 14  | CLN6      |
| chr12:70329422-70332846   | 13  | CNOT2     |
| chr5:180529274-180550117  | 16  | CNOT6     |
| chr1:246631893-246634587  | 10  | CNST      |
| chr9:121080305-121090405  | 7   | CNTRL     |
| chr16:70514334-70517740   | 7   | COG4      |
| chr5:75400204-75411103    | 36  | COL4A3BP  |
| chr20:35655201-35659014   | 103 | CPNE1     |
| chr8:86528535-86537646    | 33  | CPNE3     |
| chr14:92134010-92138347   | 12  | CPSF2     |
| chr11:61415665-61416519   | 19  | CPSF7     |
| chr3:97912166-97915736    | 9   | CRYBG3    |
| chr5:149511793-149525171  | 7   | CSNK1A1   |
| chr5:123545416-123553147  | 35  | CSNK1G3   |
| chr8:67111971-67118821    | 23  | CSPP1     |
| chr8:67154023-67159137    | 18  | CSPP1     |
| chr5:138886211-138887642  | 8   | CTNNA1    |
| chr2:224535527-224557856  | 632 | CUL3      |
| chr10:100256261-100260319 | 16  | CWF19L1   |
| chr2:203278572-203292326  | 11  | CYP20A1   |
| chr7:6421726-6426114      | 47  | DAGLB     |
| chr17:45033934-45035002   | 5   | DCAKD     |
| chr11:118756259-118758902 | 8   | DDX6      |
| chr2:73932597-73950732    | 9   | DGUOK     |
| chr10:12084539-12087729   | 5   | DHTKD1    |
| chr2:38802714-38806693    | 13  | DHX57     |
| chrX:154764898-154767382  | 14  | DKC1      |
| chr5:119110150-119116336  | 23  | DMXL1     |
| chr1:225185290-225240822  | 26  | DNAH14    |
| chr7:157358546-157385611  | 39  | DNAJB6    |
| chr10:21904521-21920963   | 118 | DNAJC1    |
| chr10:21918778-21920963   | 11  | DNAJC1    |
| chr10:126970701-127000307 | 565 | DOCK1     |
| chr3:51208773-51229609    | 10  | DOCK3     |
| chr13:98845923-98856031   | 5   | DOCK9     |
| chr20:50942030-50955285   | 41  | DPM1      |
| chr7:32620403-32639365    | 18  | DPY19L1P1 |
| chr1:161751654-161752464  | 10  | DUSP12    |
| chr18:49163684-49379758   | 8   | DYM       |
| chr2:171690146-171692894  | 7   | DYNC1I2   |
| chr11:103316544-103323990 | 18  | DYNC2H1   |

|                           |     |          |
|---------------------------|-----|----------|
| chr20:18433651-18449069   | 12  | DZANK1   |
| chr1:245002120-245059458  | 26  | EFCAB2   |
| chr6:52423686-52479787    | 8   | EFHC1    |
| chr9:137775108-137782397  | 33  | EHMT1    |
| chr9:137743370-137744090  | 5   | EHMT1    |
| chr11:10803210-10804050   | 7   | EIF4G2   |
| chr1:20969473-21002808    | 29  | EIF4G3   |
| chr1:20892618-20895501    | 9   | EIF4G3   |
| chr1:20980333-20981227    | 54  | EIF4G3   |
| chr8:28137697-28162078    | 8   | ELP3     |
| chr2:42295124-42304551    | 16  | EML4     |
| chr1:8862886-8868057      | 11  | ENO1     |
| chr18:697239-706578       | 23  | ENOSF1   |
| chr2:120073177-120078581  | 131 | EPB41L5  |
| chr1:51421785-51448135    | 17  | EPS15    |
| chr17:39708320-39712448   | 10  | ERBB2    |
| chr5:65992709-66014725    | 90  | ERBB2IP  |
| chr12:1263033-1290012     | 69  | ERC1     |
| chr12:1027747-1444750     | 4   | ERC1     |
| chr11:128480190-128490576 | 37  | ETS1     |
| chr6:610097-637861        | 6   | EXOC2    |
| chr6:158783519-158789371  | 21  | EZR      |
| chr5:14600964-14602332    | 11  | FAM105A  |
| chr5:74796029-74841679    | 24  | FAM169A  |
| chr4:83470202-83472288    | 7   | FAM175A  |
| chr14:35046504-35053451   | 23  | FAM177A1 |
| chr10:15837203-15847943   | 50  | FAM188A  |
| chr15:89247628-89260843   | 76  | FANCI    |
| chr15:89245606-89260843   | 7   | FANCI    |
| chr2:58221941-58229874    | 12  | FANCL    |
| chr2:58159649-58165874    | 70  | FANCL    |
| chr12:132507251-132508350 | 95  | FBRSL1   |
| chr5:171910571-171997051  | 11  | FBXW11   |
| chr12:116928022-116949706 | 47  | FBXW8    |
| chrX:131749305-131784039  | 11  | FIRRE    |
| chr6:35637013-35672759    | 11  | FKBP5    |
| chr8:43059091-43072307    | 11  | FNTA     |
| chr6:41565744-41578081    | 14  | FOXP4    |
| chr22:36493632-36493972   | 4   | FOXRED2  |
| chr15:49235850-49328130   | 25  | GALK2    |
| chr10:5796762-5800705     | 95  | GDI2     |
| chr2:69337897-69338565    | 91  | GFPT1    |
| chr7:2794927-2795143      | 71  | GNA12    |

|                           |     |              |
|---------------------------|-----|--------------|
| chr1:109573736-109582565  | 9   | GNAI3        |
| chr9:77794462-77797648    | 423 | GNAQ         |
| chr2:156496043-156513496  | 23  | GPD2         |
| chr16:46897647-46900790   | 55  | GPT2         |
| chr12:66515618-66596927   | 10  | GRIP1        |
| chr13:113344862-113363910 | 6   | GRTP1        |
| chr7:66576754-66578727    | 14  | GS1-124K5.11 |
| chr7:66573384-66576932    | 201 | GS1-124K5.11 |
| chr7:74705163-74718941    | 118 | GTF2I        |
| chr2:27341947-27343578    | 4   | GTF3C2       |
| chr7:18585280-18634742    | 7   | HDAC9        |
| chr12:112319224-112319742 | 74  | HECTD4       |
| chr10:67990903-68014186   | 33  | HERC4        |
| chr9:94444963-94454070    | 8   | HIATL1       |
| chr10:69376933-69380095   | 76  | HK1          |
| chr8:42925556-42950455    | 9   | HOOK3        |
| chr8:42925556-42959314    | 15  | HOOK3        |
| chr21:43592224-43644392   | 10  | HSF2BP       |
| chr21:43592224-43613947   | 18  | HSF2BP       |
| chr2:197493323-197498850  | 5   | HSPD1        |
| chr5:148636988-148677235  | 15  | HTR4         |
| chrX:53600117-53604834    | 33  | HUWE1        |
| chrX:53645310-53654131    | 144 | HUWE1        |
| chr6:82214226-82214829    | 36  | IBTK         |
| chr15:41069569-41087682   | 7   | INO80        |
| chr5:62437273-62451933    | 11  | IPO11        |
| chr11:9420410-9423876     | 8   | IPO7         |
| chr12:26550246-26602706   | 9   | ITPR2        |
| chr21:33856735-33867331   | 6   | ITSN1        |
| chr13:30208576-30255615   | 9   | KATNAL1      |
| chr19:33798667-33807007   | 11  | KCTD15       |
| chr11:67207509-67231960   | 9   | KDM2A        |
| chr12:121509566-121510039 | 21  | KDM2B        |
| chr18:36834202-36959435   | 5   | KIAA1328     |
| chr8:94506499-94512089    | 17  | KIAA1429     |
| chr1:233346441-233376527  | 12  | KIAA1804     |
| chr1:10258492-10268263    | 8   | KIF1B        |
| chr12:8959985-8995288     | 8   | KLRG1        |
| chr3:122442037-122464041  | 9   | KPNA1        |
| chr17:47678045-47678413   | 29  | KPNB1        |
| chr6:108759417-108760403  | 13  | LINC00222    |
| chr2:186081329-186099830  | 7   | LINC01473    |
| chr3:66412870-66417266    | 6   | LRIG1        |

|                          |     |          |
|--------------------------|-----|----------|
| chr11:46889410-46890494  | 5   | LRP4     |
| chr8:91189521-91200792   | 8   | LRRRC69  |
| chr2:237708543-237720822 | 15  | LRRFIP1  |
| chr16:206003-208188      | 14  | LUC7L    |
| chr1:219193081-219211752 | 13  | LYPLAL1  |
| chr1:9931890-9935627     | 170 | LZIC     |
| chr7:1898199-2014642     | 43  | MAD1L1   |
| chr7:1898199-1957719     | 6   | MAD1L1   |
| chr5:109817272-109830980 | 12  | MAN2A1   |
| chr19:4117418-4117629    | 5   | MAP2K2   |
| chr15:67630887-67664645  | 60  | MAP2K5   |
| chr2:227328677-227332588 | 11  | MFF      |
| chr11:12204249-12216319  | 15  | MICAL2   |
| chr13:23836239-23881787  | 8   | MIPEP    |
| chr7:131411305-131429145 | 20  | MKLN1    |
| chr4:153350063-153358622 | 9   | MND1     |
| chr17:43816037-43824005  | 29  | MPP3     |
| chr5:80725452-80741548   | 19  | MSH3     |
| chr14:64412471-64424931  | 14  | MTHFD1   |
| chr14:64417887-64419925  | 34  | MTHFD1   |
| chr14:64431531-64441453  | 15  | MTHFD1   |
| chrX:150699194-150750843 | 15  | MTMR1    |
| chr15:30974313-30976955  | 29  | MTMR10   |
| chr8:66595582-66602523   | 14  | MYBL1    |
| chr17:8518630-8535931    | 9   | MYH10    |
| chr15:71848844-71888116  | 5   | MYO9A    |
| chr2:15374607-15402301   | 11  | NBAS     |
| chr1:144439828-144450870 | 9   | NBPF15   |
| chr19:3192469-3196277    | 9   | NCLN     |
| chr17:16071408-16073569  | 32  | NCOR1    |
| chr1:53825797-53832591   | 9   | NDC1     |
| chr4:169580841-169599197 | 14  | NEK1     |
| chr3:131029612-131080588 | 6   | NEK11    |
| chr17:31200421-31206371  | 9   | NF1      |
| chr16:28955977-28959100  | 24  | NFATC2IP |
| chr2:177230813-177234271 | 12  | NFE2L2   |
| chr9:33318730-33319127   | 6   | NFX1     |
| chr10:94356534-94358215  | 16  | NOC3L    |
| chr4:139043073-139043343 | 16  | NOCT     |
| chr12:50153876-50163308  | 8   | nogene   |
| chr4:165077031-165077551 | 18  | nogene   |
| chr7:156986371-156986609 | 5   | nogene   |
| chr4:103536345-103569402 | 25  | nogene   |



|                           |     |        |
|---------------------------|-----|--------|
| chr7:66898178-66900897    | 11  | nogene |
| chr6:149734100-149734547  | 8   | nogene |
| chr20:19908398-19908959   | 8   | nogene |
| chr13:107466014-107467250 | 7   | nogene |
| chr4:128037170-128037460  | 5   | nogene |
| chr19:27472554-27521041   | 10  | nogene |
| chr4:23078613-23083788    | 14  | nogene |
| chr10:245900-263658       | 10  | nogene |
| chrX:152457249-152458262  | 110 | nogene |
| chr7:145293-148714        | 9   | nogene |
| chr9:34680905-34703038    | 6   | nogene |
| chr9:96895895-96903108    | 5   | nogene |
| chr13:50027362-50045232   | 10  | nogene |
| chr17:28722030-28722393   | 12  | nogene |
| chr7:128574719-128580094  | 36  | nogene |
| chrX:130071101-130071727  | 4   | nogene |
| chr2:231497094-231503204  | 4   | nogene |
| chr17:517939-518459       | 14  | nogene |
| chr13:28701789-28717655   | 11  | nogene |
| chr20:45836398-45838988   | 12  | nogene |
| chr9:128308833-128309271  | 9   | nogene |
| chr5:37533137-37534043    | 9   | nogene |
| chr1:9893008-9894243      | 6   | nogene |
| chr6:140804234-140816230  | 6   | nogene |
| chrX:3822373-3826729      | 9   | nogene |
| chr3:8840195-8852948      | 16  | nogene |
| chrM:3789-4053            | 97  | nogene |
| chrX:152834650-152835121  | 7   | nogene |
| chr7:149585129-149608783  | 10  | nogene |
| chr1:113024967-113025415  | 8   | nogene |
| chr10:119575690-119580538 | 14  | nogene |
| chr22:37977159-37977328   | 4   | nogene |
| chr2:111233627-111248241  | 12  | nogene |
| chr18:45611490-45611797   | 8   | nogene |
| chr6:141772872-141910011  | 4   | nogene |
| chr14:96943516-96945386   | 5   | nogene |
| chr1:20775723-20776005    | 31  | nogene |
| chrX:119539037-119539709  | 36  | nogene |
| chr7:128631679-128638897  | 9   | nogene |
| chr22:37612696-37613446   | 34  | nogene |
| chr11:118582360-118582804 | 5   | nogene |
| chr5:172254401-172255817  | 5   | nogene |
| chr1:26716113-26716720    | 7   | nogene |

|                          |     |         |
|--------------------------|-----|---------|
| chrX:11055935-11110981   | 90  | nogene  |
| chr8:128009589-128048609 | 18  | nogene  |
| chr17:81596115-81600427  | 27  | NPLOC4  |
| chr6:3006467-3012674     | 26  | NQO2    |
| chr7:129657342-129677758 | 4   | NRF1    |
| chr5:6622015-6625669     | 67  | NSUN2   |
| chr5:37301436-37305210   | 23  | NUP155  |
| chr10:13110273-13122487  | 15  | OPTN    |
| chr2:200942684-200958133 | 11  | ORC2    |
| chr1:51750144-51761971   | 11  | OSBPL9  |
| chr5:14678680-14681607   | 49  | OTULIN  |
| chr5:14678680-14681624   | 8   | OTULIN  |
| chr10:73046924-73074915  | 9   | P4HA1   |
| chr17:81855141-81855586  | 242 | P4HB    |
| chr13:28197184-28220378  | 57  | PAN3    |
| chr13:24459043-24469110  | 51  | PARP4   |
| chr22:44093927-44119140  | 7   | PARVB   |
| chr15:43768488-43769646  | 5   | PDIA3   |
| chr4:94523723-94586444   | 10  | PDLIM5  |
| chr16:2557702-2561522    | 8   | PDPK1   |
| chr6:107324555-107334332 | 15  | PDSS2   |
| chr5:115230975-115238009 | 15  | PGGT1B  |
| chr17:78392475-78404089  | 32  | PGS1    |
| chr7:11040671-11051780   | 15  | PHF14   |
| chr6:79015081-79019159   | 14  | PHIP    |
| chr16:71702597-71714801  | 51  | PHLPP2  |
| chr1:113724758-113738799 | 16  | PHTF1   |
| chr11:86007541-86014963  | 6   | PICALM  |
| chr11:85990249-86031611  | 35  | PICALM  |
| chr4:505717-506866       | 7   | PIGG    |
| chr10:22591628-22609717  | 38  | PIP4K2A |
| chr10:22567850-22591781  | 21  | PIP4K2A |
| chr7:30074070-30078778   | 19  | PLEKHA8 |
| chr2:43745865-43765726   | 18  | PLEKHH2 |
| chr2:55640626-55643425   | 5   | PNPT1   |
| chrX:24821451-24843677   | 23  | POLA1   |
| chr11:65267476-65275998  | 11  | POLA2   |
| chr6:43597695-43601091   | 105 | POLH    |
| chr6:43587271-43597865   | 7   | POLH    |
| chr6:43582315-43583141   | 25  | POLH    |
| chr7:102539605-102569924 | 7   | POLR2J3 |
| chr12:42351884-42375074  | 8   | PPHLN1  |
| chr2:169603641-169608758 | 42  | PPIG    |

|                           |      |          |
|---------------------------|------|----------|
| chr5:134197775-134206131  | 27   | PPP2CA   |
| chr11:111752158-111755450 | 6    | PPP2R1B  |
| chrX:361404-361590        | 10   | PPP2R3B  |
| chr8:47935008-47936517    | 7    | PRKDC    |
| chr1:150334934-150338326  | 6    | PRPF3    |
| chr15:55624341-55627128   | 4    | PRTG     |
| chr9:120820838-120821464  | 10   | PSMD5    |
| chr20:1118752-1135306     | 9    | PSMF1    |
| chr10:87864453-87961118   | 7    | PTEN     |
| chr8:140846259-140864399  | 1239 | PTK2     |
| chr8:140735250-140743330  | 6    | PTK2     |
| chr8:140789473-140921132  | 9    | PTK2     |
| chr18:7926567-7955414     | 14   | PTPRM    |
| chr1:31005852-31007102    | 514  | PUM1     |
| chr7:105459167-105495253  | 16   | PUS7     |
| chr7:105481051-105502564  | 25   | PUS7     |
| chr9:136224006-136226874  | 79   | QSOX2    |
| chr12:57298089-57310463   | 8    | R3HDM2   |
| chr17:5335183-5338138     | 6    | RABEP1   |
| chr9:122957010-122986419  | 54   | RABGAP1  |
| chr7:66712166-66713468    | 7    | RABGEF1  |
| chr2:113628549-113633060  | 8    | RABL2A   |
| chr14:67823541-67887204   | 74   | RAD51B   |
| chr14:35595633-35635598   | 27   | RALGAPA1 |
| chr5:170916464-171028989  | 8    | RANBP17  |
| chr5:87331347-87338091    | 112  | RASA1    |
| chr13:114052051-114057441 | 8    | RASA3    |
| chr20:37044085-37044250   | 9    | RBL1     |
| chr16:53439015-53447106   | 69   | RBL2     |
| chr5:146254942-146258593  | 246  | RBM27    |
| chr7:155763811-155774647  | 10   | RBM33    |
| chr3:50068689-50075330    | 9    | RBM6     |
| chr1:8465924-8557523      | 5    | RERE     |
| chr2:99418827-99435941    | 12   | REV1     |
| chr16:74632522-74636577   | 76   | RFWD3    |
| chr2:151422949-151438746  | 7    | RIF1     |
| chr8:100264033-100288267  | 6    | RNF19A   |
| chr18:21039471-21044186   | 19   | ROCK1    |
| chr14:90943077-91001159   | 40   | RPS6KA5  |
| chr1:213077695-213088030  | 10   | RPS6KC1  |
| chr16:15063195-15073080   | 5    | RRN3     |
| chr6:43024984-43027477    | 35   | RRP36    |
| chr11:77725544-77764689   | 45   | RSF1     |

|                           |     |          |
|---------------------------|-----|----------|
| chr11:77740730-77747128   | 26  | RSF1     |
| chr11:77685104-77693611   | 47  | RSF1     |
| chr15:41471171-41477515   | 29  | RTF1     |
| chr9:35558196-35559272    | 12  | RUSC2    |
| chr12:55794358-55800900   | 14  | SARNP    |
| chr12:123334052-123350441 | 5   | SBNO1    |
| chr9:124999890-125003570  | 8   | SCAI     |
| chr7:29926451-29936721    | 9   | SCRN1    |
| chr3:195688532-195699207  | 76  | SDHAP2   |
| chr14:39064912-39076093   | 4   | SEC23A   |
| chr14:39055142-39067296   | 6   | SEC23A   |
| chr5:134674614-134679728  | 9   | SEC24A   |
| chr4:109462900-109463644  | 75  | SEC24B   |
| chr4:82878729-82881940    | 166 | SEC31A   |
| chr6:107904628-107924932  | 52  | SEC63    |
| chr2:241342991-241348191  | 63  | 2-Sep    |
| chr6:2833873-2840594      | 8   | SERPINB1 |
| chr3:47056820-47057490    | 11  | SETD2    |
| chr16:70560468-70564050   | 41  | SF3B3    |
| chr4:107895309-107903386  | 6   | SGMS2    |
| chr11:116863667-116873636 | 12  | SIK3     |
| chr19:38109685-38110384   | 11  | SIPA1L3  |
| chr4:1696201-1700070      | 5   | SLBP     |
| chr6:44227259-44232428    | 5   | SLC29A1  |
| chr2:32171286-32184338    | 13  | SLC30A6  |
| chr9:96336716-96352109    | 39  | SLC35D2  |
| chr11:62870744-62871669   | 11  | SLC3A2   |
| chr16:68266592-68291661   | 12  | SLC7A6   |
| chr4:103028746-103047226  | 4   | SLC9B2   |
| chr6:70754979-70798737    | 14  | SMAP1    |
| chr3:47706408-47720735    | 7   | SMARCC1  |
| chr3:47638724-47678311    | 27  | SMARCC1  |
| chr19:43744771-43750747   | 8   | SMG9     |
| chr17:64583460-64598490   | 5   | SMURF2   |
| chr15:24962113-24968082   | 32  | SNRPN    |
| chr5:122795265-122803613  | 30  | SNX2     |
| chr16:21338920-21352138   | 12  | SNX29P1  |
| chr1:179341027-179343635  | 13  | SOAT1    |
| chr20:36804734-36805957   | 43  | SOGA1    |
| chr2:39056701-39058804    | 4   | SOS1     |
| chr4:123028185-123028395  | 8   | SPATA5   |
| chr2:200412310-200419496  | 13  | SPATS2L  |
| chr15:64976474-64983593   | 25  | SPG21    |

|                           |      |         |
|---------------------------|------|---------|
| chr3:113499438-113506605  | 32   | SPICE1  |
| chr18:12506476-12546904   | 5    | SPIRE1  |
| chr9:128630320-128632955  | 16   | SPTAN1  |
| chr7:105293533-105297533  | 82   | SRPK2   |
| chr18:26018018-26078160   | 4    | SS18    |
| chr1:84655831-84671308    | 31   | SSX2IP  |
| chr3:136568764-136591549  | 17   | STAG1   |
| chr12:130808630-130827267 | 11   | STX2    |
| chr9:127661101-127666296  | 6    | STXBP1  |
| chr3:67495797-67508903    | 105  | SUCLG2  |
| chr1:172555868-172557794  | 89   | SUCO    |
| chr1:85164525-85164757    | 6    | SYDE2   |
| chr14:63961524-63976727   | 5    | SYNE2   |
| chr17:37458523-37465541   | 8    | TADA2A  |
| chrX:71397252-71408151    | 9    | TAF1    |
| chr3:11807832-11839314    | 9    | TAMM41  |
| chr2:159065895-159097834  | 34   | TANC1   |
| chr20:13528432-13587370   | 15   | TASP1   |
| chr10:94441895-94497172   | 7    | TBC1D12 |
| chr4:26613168-26620688    | 7    | TBC1D19 |
| chr3:17508473-17576549    | 4    | TBC1D5  |
| chr17:82756164-82893632   | 9    | TBCD    |
| chr17:47698594-47699697   | 9    | TBKBP1  |
| chrX:9684042-9697429      | 24   | TBL1X   |
| chr20:62854015-62857638   | 122  | TCFL5   |
| chr19:41348294-41348455   | 9    | TGFB1   |
| chr2:43291695-43293213    | 7    | THADA   |
| chrX:123686547-123712908  | 15   | THOC2   |
| chr2:70227734-70236175    | 8    | TIA1    |
| chr10:49952125-49955060   | 28   | TIMM23B |
| chr15:66349059-66352207   | 6    | TIPIN   |
| chr6:43498922-43503706    | 4    | TJAP1   |
| chr15:29761138-29762438   | 10   | TJP1    |
| chr9:79709622-79721888    | 8    | TLE4    |
| chr17:62520772-62536337   | 5    | TLK2    |
| chr13:99529466-99537863   | 10   | TM9SF2  |
| chr9:109057190-109073438  | 21   | TMEM245 |
| chr9:105705596-105722621  | 135  | TMEM38B |
| chr7:129014978-129018157  | 1329 | TNPO3   |
| chr7:128978982-128980031  | 28   | TNPO3   |
| chr17:54947260-54950126   | 6    | TOM1L1  |
| chr1:223810430-223814353  | 9    | TP53BP2 |
| chr7:66240324-66241270    | 438  | TPST1   |

|                           |     |         |
|---------------------------|-----|---------|
| chr22:16602063-16614178   | 4   | TPTEP1  |
| chr14:102816738-102830472 | 19  | TRAF3   |
| chr18:31897785-31917667   | 18  | TRAPPC8 |
| chr1:228396946-228402161  | 4   | TRIM11  |
| chr7:138504289-138525357  | 9   | TRIM24  |
| chr20:35044504-35049994   | 19  | TRPC4AP |
| chr7:98925111-98927366    | 15  | TRRAP   |
| chr3:12516610-12532773    | 14  | TSEN2   |
| chr15:42810613-42830078   | 37  | TTBK2   |
| chr18:24064139-24114647   | 5   | TTC39C  |
| chr18:24064139-24083081   | 414 | TTC39C  |
| chr17:59863663-59878334   | 9   | TUBD1   |
| chr15:43398037-43401850   | 40  | TUBGCP4 |
| chr15:23026115-23037152   | 10  | TUBGCP5 |
| chr12:104311289-104315896 | 36  | TXNRD1  |
| chr9:33948373-33953474    | 175 | UBAP2   |
| chr9:33944364-33948587    | 25  | UBAP2   |
| chr17:4289229-4303745     | 8   | UBE2G1  |
| chr4:39737419-39755739    | 272 | UBE2K   |
| chr15:43056343-43059192   | 8   | UBR1    |
| chr1:19176591-19187540    | 4   | UBR4    |
| chr8:102342472-102347092  | 35  | UBR5    |
| chr8:102329089-102346395  | 49  | UBR5    |
| chr9:6420911-6434173      | 441 | UHRF2   |
| chr13:27069110-27075388   | 10  | USP12   |
| chr13:27069089-27090158   | 4   | USP12   |
| chr17:21015751-21021226   | 5   | USP22   |
| chr15:63532646-63563008   | 299 | USP3    |
| chr16:23102318-23120246   | 16  | USP31   |
| chr17:60236137-60271481   | 8   | USP32   |
| chr2:218509978-218530040  | 20  | USP37   |
| chr2:85619219-85636130    | 7   | USP39   |
| chr3:49324701-49325845    | 39  | USP4    |
| chr10:11518534-11597717   | 23  | USP6NL  |
| chr6:144421877-144429741  | 23  | UTRN    |
| chr16:70731494-70744579   | 16  | VAC14   |
| chr8:99170038-99275254    | 16  | VPS13B  |
| chr8:99142973-99156743    | 6   | VPS13B  |
| chr16:46680670-46683606   | 29  | VPS35   |
| chr3:184924861-185024389  | 4   | VPS8    |
| chr14:102194937-102197847 | 166 | WDR20   |
| chr14:102194937-102198514 | 5   | WDR20   |
| chr1:224398096-224401069  | 5   | WDR26   |

|                           |     |           |
|---------------------------|-----|-----------|
| chr10:1079555-1080476     | 8   | WDR37     |
| chr12:121931745-121942975 | 8   | WDR66     |
| chr18:56918071-56939393   | 12  | WDR7      |
| chr17:68428828-68434626   | 10  | WIP1      |
| chr6:43568710-43573601    | 15  | XPO5      |
| chr16:28146093-28169909   | 12  | XPO6      |
| chr1:32779381-32781145    | 13  | YARS      |
| chr4:4313040-4315970      | 55  | ZBTB49    |
| chr19:47084344-47085414   | 10  | ZC3H4     |
| chr16:11763477-11765685   | 21  | ZC3H7A    |
| chr7:6578500-6585260      | 11  | ZDHC4     |
| chr15:80098415-80131293   | 21  | ZFAND6    |
| chr16:72957426-72960194   | 10  | ZFH3      |
| chr20:63708552-63709164   | 5   | ZGPAT     |
| chr7:99512452-99520304    | 5   | ZKSCAN5   |
| chr5:43122038-43179950    | 7   | ZNF131    |
| chr10:42631928-42636972   | 8   | ZNF33B    |
| chr9:106923353-106935621  | 8   | ZNF462    |
| chr19:32356615-32360618   | 48  | ZNF507    |
| chr19:37155864-37170054   | 4   | ZNF585A   |
| chr15:66528851-66533013   | 17  | ZWILCH    |
| chr17:4021128-4025118     | 31  | ZZEF1     |
| chr6:130311290-130313093  | 167 | SAMD3     |
| chr2:32377587-32401385    | 4   | BIRC6     |
| chr14:39291018-39295029   | 14  | CTAGE5    |
| chr14:76171842-76178042   | 6   | GPATCH2L  |
| chr2:171325840-171339554  | 6   | METTL8    |
| chr1:146968447-146972960  | 67  | NBPF12    |
| chr16:31700661-31706999   | 9   | nogene    |
| chrX:132239619-132283032  | 4   | RAP2C-AS1 |
| chr9:36052264-36065624    | 17  | RECK      |
| chr16:30769185-30769600   | 4   | RNF40     |
| chr19:45821383-45827918   | 4   | SYMPK     |
| chr14:102870184-102897401 | 19  | TRAF3     |
| chr5:14304460-14316743    | 10  | TRIO      |
| chr4:87114366-87115299    | 10  | AFF1      |
| chr8:140572811-140585311  | 252 | AGO2      |
| chr5:73554321-73561288    | 13  | ANKRA2    |
| chr19:32615657-32643631   | 14  | ANKRD27   |
| chr15:60360940-60382441   | 34  | ANXA2     |
| chr7:100103408-100104154  | 35  | AP4M1     |
| chr8:123325892-123336532  | 21  | ATAD2     |
| chr10:32451591-32485144   | 8   | CCDC7     |

|                          |     |          |
|--------------------------|-----|----------|
| chr1:1649498-1712400     | 6   | CDK11B   |
| chr14:80743074-80778046  | 153 | CEP128   |
| chr9:128185546-128185776 | 9   | CIZ1     |
| chr15:22872824-22873729  | 33  | CYFIP1   |
| chr14:33925617-33927033  | 6   | EGLN3    |
| chr7:100818519-100820296 | 7   | EPHB4    |
| chr12:56099647-56100245  | 9   | ERBB3    |
| chr1:42227882-42311110   | 39  | FOXJ3    |
| chr8:11748918-11757083   | 11  | GATA4    |
| chr9:124898548-124900547 | 15  | GOLGA1   |
| chr4:108009758-108027760 | 20  | HADH     |
| chr1:155921374-155925843 | 47  | KIAA0907 |
| chr1:46580529-46594280   | 16  | MKNK1    |
| chr2:151278827-151282954 | 8   | NMI      |
| chr7:32833007-32838666   | 77  | nogene   |
| chr14:24170833-24171379  | 24  | nogene   |
| chr18:47091173-47097404  | 19  | nogene   |
| chr12:27426131-27426317  | 5   | nogene   |
| chr5:177280564-177283928 | 25  | NSD1     |
| chr10:34493285-34517159  | 8   | PARD3    |
| chr5:31995575-32010482   | 9   | PDZD2    |
| chr15:77252366-77286504  | 53  | PEAK1    |
| chr3:170097171-170122744 | 4   | PHC3     |
| chr1:88804390-88813733   | 8   | PKN2     |
| chr18:54271359-54284013  | 46  | POLI     |
| chr9:131459163-131459356 | 10  | PRRC2B   |
| chr1:226885537-226889049 | 8   | PSEN2    |
| chr9:112250928-112252788 | 74  | PTBP3    |
| chr8:103766226-103809321 | 4   | RIMS2    |
| chr1:92333390-92345914   | 43  | RPAP2    |
| chr3:47425484-47443091   | 8   | SCAP     |
| chr7:85121740-85224441   | 8   | SEMA3D   |
| chr4:151143909-151149561 | 7   | SH3D19   |
| chrX:46620976-46653705   | 17  | SLC9A7   |
| chr1:227758994-227759485 | 12  | SNAP47   |
| chr16:2756333-2896771    | 26  | SRRM2    |
| chr1:235437321-235441882 | 6   | TBCE     |
| chr3:177049996-177065022 | 5   | TBL1XR1  |
| chrX:123665641-123671761 | 21  | THOC2    |
| chr15:42244049-42268032  | 6   | TMEM87A  |
| chr11:35725923-35735445  | 13  | TRIM44   |
| chr11:62735381-62738490  | 23  | TTC9C    |
| chr4:39733358-39745810   | 10  | UBE2K    |



|                           |    |              |
|---------------------------|----|--------------|
| chr7:139266332-139272440  | 37 | UBN2         |
| chr13:96013306-96031971   | 11 | UGGT2        |
| chr2:61284874-61296925    | 11 | USP34        |
| chr18:9936109-9945058     | 5  | VAPA         |
| chr8:99575657-99577633    | 36 | VPS13B       |
| chr2:127768188-127771004  | 50 | WDR33        |
| chrX:54232808-54239099    | 10 | WNK3         |
| chr7:130026157-130049144  | 8  | ZC3HC1       |
| chr17:30449552-30451846   | 10 | CPD          |
| chr1:197642710-197652315  | 10 | DENND1B      |
| chr16:58709416-58716813   | 9  | GOT2         |
| chr3:197983942-197996282  | 10 | LMLN         |
| chr17:64561499-64586170   | 24 | SMURF2       |
| chrX:67882125-67921219    | 5  | nogene       |
| chr7:66551519-66554837    | 5  | GS1-124K5.11 |
| chr12:122579904-122582985 | 13 | KNTC1        |
| chr1:11989164-11992690    | 32 | MFN2         |
| chr11:106009582-106011067 | 17 | MSANTD4      |
| chr2:200886719-200887124  | 7  | nogene       |
| chr14:85978969-86041833   | 8  | nogene       |
| chr3:17586352-17625224    | 10 | nogene       |
| chr11:73677720-73679720   | 13 | RAB6A        |
| chr6:88769773-88891915    | 7  | RNGTT        |
| chr5:69104630-69114496    | 45 | SLC30A5      |
| chr12:63983946-63990072   | 16 | SRGAP1       |
| chr16:3679718-3690985     | 5  | TRAP1        |
| chr1:19176591-19177743    | 7  | UBR4         |
| chr11:18570620-18578808   | 16 | UEVLD        |
| chr14:31380466-31383771   | 17 | HEATR5A      |
| chr6:75835900-75844977    | 11 | MYO6         |
| chr9:100239998-100272982  | 5  | nogene       |
| chr2:135661269-135680324  | 8  | R3HDM1       |
| chr6:145919347-145933178  | 17 | SHPRH        |
| chr17:51014231-51021365   | 34 | SPAG9        |
| chr17:82884144-82909307   | 10 | TBCD         |
| chr19:4944131-4944450     | 39 | UHRF1        |
| chr3:51470928-51492513    | 11 | VPRBP        |
| chr6:85517755-85530275    | 87 | SNX14        |
| chr15:72555270-72561549   | 10 | ARIH1        |
| chr20:37732878-37737484   | 10 | CTNBL1       |
| chr1:224236505-224268133  | 46 | NVL          |
| chr1:161041323-161043360  | 10 | USF1         |
| chr2:134336216-134338420  | 11 | MGAT5        |

|                           |     |          |
|---------------------------|-----|----------|
| chr4:55417071-55417985    | 12  | TMEM165  |
| chr2:74003109-74048411    | 12  | TET3     |
| chr6:24502522-24533687    | 6   | ALDH5A1  |
| chr12:31479588-31499671   | 27  | DENND5B  |
| chrX:131692437-131794466  | 20  | FIRRE    |
| chr8:101199194-101201743  | 19  | ZNF706   |
| chr2:73419122-73432291    | 38  | ALMS1    |
| chr10:92081319-92091944   | 33  | CPEB3    |
| chr2:43957384-43975217    | 6   | LRPPRC   |
| chr1:84937754-84965708    | 12  | MCOLN2   |
| chrX:68081700-68119332    | 8   | OPHN1    |
| chr15:43768488-43770580   | 11  | PDIA3    |
| chr3:128884652-128904505  | 6   | ACAD9    |
| chr5:65188015-65197151    | 35  | ADAMTS6  |
| chr16:89977677-89978878   | 7   | AFG3L1P  |
| chr1:36039789-36043548    | 12  | AGO3     |
| chr1:246913231-246918377  | 107 | AHCTF1   |
| chr15:85521427-85543955   | 25  | AKAP13   |
| chr19:49458485-49459848   | 13  | ALDH16A1 |
| chr5:126570781-126593404  | 6   | ALDH7A1  |
| chr10:27092405-27098326   | 4   | ANKRD26  |
| chr5:10618332-10638168    | 8   | ANKRD33B |
| chr5:112780789-112801383  | 18  | APC      |
| chr21:25975069-25997416   | 7   | APP      |
| chr4:147857552-147866816  | 12  | ARHGAP10 |
| chr6:129629352-129642018  | 8   | ARHGAP18 |
| chr13:111153904-111244294 | 11  | ARHGEF7  |
| chr3:48979481-48983292    | 8   | ARIH2    |
| chr8:130358016-130427822  | 25  | ASAP1    |
| chr8:61676139-61684188    | 16  | ASPH     |
| chr11:108227775-108235834 | 11  | ATM      |
| chrX:77557450-77574358    | 6   | ATRX     |
| chr16:88018427-88038011   | 147 | BANP     |
| chr15:90769132-90769586   | 25  | BLM      |
| chr10:73727292-73728587   | 14  | BMS1P4   |
| chr17:67945408-67948306   | 30  | BPTF     |
| chr11:93747296-93754037   | 4   | C11orf54 |
| chr11:74012577-74013525   | 5   | C2CD3    |
| chr5:37114959-37121784    | 14  | C5orf42  |
| chr7:82060427-82117173    | 18  | CACNA2D1 |
| chr17:63751939-63754518   | 12  | CCDC47   |
| chr10:59832524-59852702   | 49  | CCDC6    |
| chr16:2439352-2439826     | 5   | CCNF     |

|                           |     |          |
|---------------------------|-----|----------|
| chr7:90747680-90863269    | 13  | CDK14    |
| chr17:15605222-15615809   | 10  | CDRT1    |
| chr1:243186258-243225321  | 16  | CEP170   |
| chr16:53228982-53243016   | 36  | CHD9     |
| chr12:119850173-119857698 | 8   | CIT      |
| chr2:121450912-121458975  | 12  | CLASP1   |
| chr16:58560211-58560362   | 13  | CNOT1    |
| chr3:32703867-32704972    | 7   | CNOT10   |
| chr12:69258589-69262562   | 7   | CPSF6    |
| chr9:129098012-129098650  | 8   | CRAT     |
| chr16:3736035-3745354     | 8   | CREBBP   |
| chr10:125110989-125133612 | 8   | CTBP2    |
| chr11:57794009-57796992   | 9   | CTNND1   |
| chr10:35013698-35031619   | 52  | CUL2     |
| chr1:167987494-168004793  | 13  | DCAF6    |
| chr3:182963880-182965753  | 9   | DCUN1D1  |
| chr22:19063201-19089490   | 21  | DGCR2    |
| chrX:2266739-2291603      | 11  | DHRX     |
| chr20:36496704-36500611   | 19  | DLGAP4   |
| chr3:51137442-51146630    | 13  | DOCK3    |
| chr15:65500605-65512564   | 4   | DPP8     |
| chr1:212042992-212047417  | 9   | DTL      |
| chr14:102040235-102044698 | 12  | DYNC1H1  |
| chr8:85202146-85209409    | 9   | E2F5     |
| chr2:62747394-62771392    | 30  | EHBP1    |
| chr8:108234997-108240075  | 12  | EIF3E    |
| chr8:116706337-116726172  | 9   | EIF3H    |
| chr3:186784696-186784935  | 7   | EIF4A2   |
| chr14:103336676-103339803 | 41  | EIF5     |
| chr4:139125163-139168042  | 14  | ELF2     |
| chr1:205616477-205623891  | 145 | ELK4     |
| chr8:28129501-28137891    | 12  | ELP3     |
| chr12:1289851-1319288     | 13  | ERC1     |
| chr12:22643762-22671355   | 14  | ETNK1    |
| chr6:592468-619543        | 29  | EXOC2    |
| chr6:576756-599225        | 10  | EXOC2    |
| chr7:22983943-22998161    | 26  | FAM126A  |
| chr10:50090775-50093917   | 7   | FAM21A   |
| chrX:14843659-14845286    | 8   | FANCB    |
| chr5:15927889-15928501    | 5   | FBXL7    |
| chr2:105373558-105386540  | 8   | FHL2     |
| chr13:49138746-49145935   | 68  | FND3A    |
| chr10:93684055-93687449   | 30  | FRA10AC1 |

|                           |     |              |
|---------------------------|-----|--------------|
| chr14:51689690-51708233   | 12  | FRMD6        |
| chr1:77955254-77956700    | 29  | FUBP1        |
| chr5:151799211-151800869  | 8   | G3BP1        |
| chr3:81577924-81705613    | 8   | GBE1         |
| chr3:158665336-158691648  | 11  | GFM1         |
| chr2:69363544-69374113    | 53  | GFPT1        |
| chr1:1815755-1839238      | 926 | GNB1         |
| chr12:132807176-132822311 | 65  | GOLGA3       |
| chr9:86033281-86036507    | 11  | GOLM1        |
| chr17:30495425-30520021   | 12  | GOSR1        |
| chr9:130079629-130092381  | 17  | GPR107       |
| chr1:108901789-108904254  | 13  | GPSM2        |
| chr7:66573384-66578727    | 14  | GS1-124K5.11 |
| chr5:21491320-21502203    | 4   | GUSBP1       |
| chr2:171965337-171966949  | 15  | HAT1         |
| chrX:72351732-72464731    | 10  | HDAC8        |
| chr8:42964310-42968214    | 20  | HOOK3        |
| chr2:24312211-24315224    | 9   | ITSN2        |
| chr17:46094559-46172232   | 5   | KANSL1       |
| chr18:41501119-41525526   | 6   | KC6          |
| chr17:6594971-6600458     | 18  | KIAA0753     |
| chr2:61068848-61118116    | 7   | KIAA1841     |
| chr13:49705620-49706372   | 18  | KPNA3        |
| chr6:149676259-149678745  | 30  | LATS1        |
| chr10:65571424-65615761   | 17  | LINC01515    |
| chr22:47686199-47686938   | 6   | LOC284930    |
| chr1:211778917-211793190  | 47  | LPGAT1       |
| chr4:150828179-150831976  | 8   | LRBA         |
| chr7:2222574-2230727      | 14  | MAD1L1       |
| chr7:1898199-1980541      | 17  | MAD1L1       |
| chr3:185437446-185466963  | 9   | MAP3K13      |
| chr9:125583405-125585727  | 7   | MAPKAP1      |
| chr19:18121684-18124774   | 10  | MAST3        |
| chr18:54188873-54205157   | 10  | MBD2         |
| chr21:46273387-46277717   | 20  | MCM3AP       |
| chr17:2438108-2473664     | 14  | METTL16      |
| chr8:17077782-17090584    | 8   | MICU3        |
| chr10:87508335-87521169   | 41  | MINPP1       |
| chr13:23836239-23864189   | 21  | MIPEP        |
| chr14:37240432-37247907   | 15  | MIPOL1       |
| chr14:37308055-37369624   | 16  | MIPOL1       |
| chr17:43808955-43818110   | 4   | MPP3         |
| chr2:42570436-42609584    | 30  | MTA3         |

|                           |     |        |
|---------------------------|-----|--------|
| chr8:97713661-97723035    | 82  | MTDH   |
| chrX:150638942-150649901  | 41  | MTM1   |
| chr6:73466208-73466606    | 167 | MTO1   |
| chr1:11212311-11216234    | 5   | MTOR   |
| chr18:3253232-3255962     | 9   | MYL12A |
| chr3:123793676-123876617  | 14  | MYLK   |
| chr15:71999850-72027793   | 25  | MYO9A  |
| chr12:76059797-76068994   | 6   | NAP1L1 |
| chr2:96364480-96367373    | 10  | NCAPH  |
| chr9:97653797-97656085    | 48  | NCBP1  |
| chr3:172635915-172648114  | 34  | NCEH1  |
| chr5:150541569-150551855  | 7   | NDST1  |
| chr2:206141940-206149925  | 5   | NDUFS1 |
| chr12:96909751-96912817   | 5   | NEDD1  |
| chr14:75117194-75121174   | 15  | NEK9   |
| chr12:104120399-104135532 | 6   | NFYB   |
| chr5:36953617-36961583    | 5   | NIPBL  |
| chr5:65780178-65788484    | 7   | NLN    |
| chr3:37275818-37276517    | 13  | nogene |
| chr3:40309870-40312169    | 21  | nogene |
| chr3:51541588-51552063    | 9   | nogene |
| chr6:30723619-30723775    | 10  | nogene |
| chr2:44174761-44180397    | 16  | nogene |
| chr10:5699524-5714207     | 28  | nogene |
| chr1:7777158-7778165      | 9   | nogene |
| chr1:187326920-187443726  | 6   | nogene |
| chr22:41474879-41475610   | 6   | nogene |
| chr1:120533815-120535809  | 25  | nogene |
| chr3:196714672-196714862  | 8   | nogene |
| chr19:21062605-21077216   | 4   | nogene |
| chr10:31355143-31358333   | 12  | nogene |
| chr12:10216278-10216634   | 4   | nogene |
| chr8:123378624-123378901  | 17  | nogene |
| chr11:61374864-61375417   | 14  | nogene |
| chr10:38066360-38066854   | 13  | nogene |
| chr7:66520594-66523179    | 5   | nogene |
| chr4:2952274-2956811      | 24  | NOP14  |
| chr1:119996996-120029987  | 25  | NOTCH2 |
| chr11:108172198-108177090 | 30  | NPAT   |
| chr17:41828789-41830890   | 30  | NT5C3B |
| chr6:17688395-17688618    | 17  | NUP153 |
| chr15:41356038-41358258   | 23  | NUSAP1 |
| chr1:224233200-224268133  | 18  | NVL    |

|                           |     |         |
|---------------------------|-----|---------|
| chr1:58506059-58536741    | 241 | OMA1    |
| chr11:69667894-69673321   | 10  | ORAOV1  |
| chr5:38903881-38917622    | 8   | OSMR    |
| chr16:14552020-14604226   | 7   | PARN    |
| chr13:24469893-24478276   | 6   | PARP4   |
| chr21:46363479-46367139   | 4   | PCNT    |
| chr14:70976941-70995925   | 27  | PCNX    |
| chr1:233258027-233259344  | 7   | PCNXL2  |
| chr14:60114699-60116060   | 11  | PCNXL4  |
| chr4:156850220-156861489  | 42  | PDGFC   |
| chr11:34947505-34970286   | 125 | PDHX    |
| chr18:62895010-62920114   | 7   | PHLPP1  |
| chr8:10820192-10834775    | 94  | PINX1   |
| chr11:94574998-94583569   | 11  | PIWIL4  |
| chr11:94583447-94608686   | 7   | PIWIL4  |
| chr4:88051990-88065879    | 6   | PKD2    |
| chr1:15719733-15721388    | 36  | PLEKHM2 |
| chr2:207828222-207861262  | 6   | PLEKHM3 |
| chr15:75043440-75048721   | 10  | PPCDC   |
| chr2:44194197-44209327    | 13  | PPM1B   |
| chr2:48474682-48480016    | 10  | PPP1R21 |
| chrX:338603-341931        | 54  | PPP2R3B |
| chr14:91468894-91470995   | 7   | PPP4R3A |
| chr12:11047019-11121180   | 23  | PRH1    |
| chr12:56746780-56751195   | 29  | PRIM1   |
| chrX:3626418-3641971      | 16  | PRKX    |
| chr8:140700890-140717709  | 51  | PTK2    |
| chr9:94085250-94088263    | 17  | PTPDC1  |
| chr20:2923206-2988474     | 9   | PTPRA   |
| chr5:170896049-170924550  | 9   | RANBP17 |
| chr17:40330856-40331396   | 11  | RARA    |
| chr5:168500590-168502105  | 65  | RARS    |
| chr1:64768655-64789514    | 19  | RAVER2  |
| chr5:146228945-146237432  | 5   | RBM27   |
| chr11:110263959-110279756 | 10  | RDX     |
| chr16:74644361-74652122   | 30  | RFWD3   |
| chr12:122508217-122511188 | 6   | RSRC2   |
| chr3:128035378-128087808  | 9   | RUVBL1  |
| chr20:36916721-36919519   | 6   | SAMHD1  |
| chr15:76574157-76683061   | 14  | SCAPER  |
| chr4:82878729-82881937    | 69  | SEC31A  |
| chr3:47105996-47116754    | 47  | SETD2   |
| chr9:132295871-132311856  | 10  | SETX    |

|                           |     |          |
|---------------------------|-----|----------|
| chr3:52930328-52969258    | 14  | SFMBT1   |
| chr1:86722539-86724405    | 5   | SH3GLB1  |
| chr10:110951607-110965061 | 21  | SHOC2    |
| chr10:116951908-116960230 | 11  | SHTN1    |
| chr1:115983548-115992243  | 7   | SLC22A15 |
| chr14:69441831-69442266   | 29  | SLC39A9  |
| chrX:136012957-136016758  | 26  | SLC9A6   |
| chrX:46620976-46648797    | 12  | SLC9A7   |
| chr18:12420324-12421629   | 37  | SLMO1    |
| chr9:33060464-33062177    | 7   | SMU1     |
| chr17:64578491-64586170   | 28  | SMURF2   |
| chr17:64571797-64598490   | 26  | SMURF2   |
| chr15:45068180-45069052   | 16  | SORD     |
| chr2:32087491-32089605    | 5   | SPAST    |
| chr1:48385308-48403882    | 34  | SPATA6   |
| chr12:64062916-64087026   | 26  | SRGAP1   |
| chr4:56478378-56484864    | 12  | SRP72    |
| chr20:62162751-62163622   | 20  | SS18L1   |
| chr12:108817037-108852678 | 6   | SSH1     |
| chr1:112591524-112611003  | 17  | ST7L     |
| chr3:136472412-136502779  | 9   | STAG1    |
| chr9:123173676-123184298  | 7   | STRBP    |
| chr14:21366438-21373430   | 7   | SUPT16H  |
| chr17:31940285-31973231   | 127 | SUZ12    |
| chr22:46974289-47037198   | 69  | TBC1D22A |
| chr6:121279120-121283910  | 11  | TBC1D32  |
| chr17:82763964-82809782   | 7   | TBCD     |
| chr22:42209650-42215341   | 50  | TCF20    |
| chr11:33065829-33068859   | 4   | TCP11L1  |
| chrX:123625911-123627968  | 14  | THOC2    |
| chr14:58410842-58411971   | 5   | TIMM9    |
| chr13:113495501-113520733 | 12  | TMCO3    |
| chr12:111933885-111991889 | 10  | TMEM116  |
| chr1:95136692-95151419    | 9   | TMEM56   |
| chr15:43148754-43169677   | 6   | TMEM62   |
| chr8:93763841-93785378    | 8   | TMEM67   |
| chrX:155506897-155537118  | 37  | TMLHE    |
| chr5:14330777-14336727    | 212 | TRIO     |
| chr3:142736378-142785040  | 20  | TRPC1    |
| chr9:122031722-122040479  | 7   | TTLL11   |
| chr19:34433347-34464131   | 9   | UBA2     |
| chr19:34430575-34467014   | 21  | UBA2     |
| chr1:154251040-154251653  | 89  | UBAP2L   |

|                           |     |            |
|---------------------------|-----|------------|
| chr1:1256991-1257310      | 227 | UBE2J2     |
| chr3:33409235-33425741    | 80  | UBP1       |
| chr6:42637010-42642481    | 10  | UBR2       |
| chr3:196361843-196362687  | 28  | UBXN7      |
| chr11:18544622-18558330   | 11  | UEVLD      |
| chr13:95832926-95859675   | 8   | UGGT2      |
| chr5:176955958-176982623  | 8   | UIMC1      |
| chr3:124737567-124744203  | 48  | UMPS       |
| chr15:63532646-63559970   | 17  | USP3       |
| chr3:49302383-49305888    | 21  | USP4       |
| chr10:74097203-74101097   | 23  | VCL        |
| chr3:51440969-51483836    | 10  | VPRBP      |
| chr7:38789800-38830328    | 8   | VPS41      |
| chr1:224393827-224399034  | 10  | WDR26      |
| chr12:121942533-121942975 | 5   | WDR66      |
| chr6:2779262-2783561      | 36  | WRNIP1     |
| chr5:113553766-113563492  | 50  | YTHDC2     |
| chr1:155675009-155680456  | 14  | YY1AP1     |
| chr1:52445786-52461769    | 10  | ZCCHC1     |
| chr18:62539680-62576652   | 14  | ZCCHC2     |
| chr20:25632157-25634170   | 30  | ZNF337-AS1 |
| chr19:36472910-36473458   | 9   | ZNF566     |
| chr1:90916639-90918154    | 52  | ZNF644     |
| chr19:58089864-58090386   | 10  | ZSCAN18    |
| chr2:218667911-218668679  | 4   | RNF25      |
| chr19:57863364-57863759   | 49  | nogene     |
| chr5:109729341-109789527  | 10  | MAN2A1     |
| chr12:124913039-124913267 | 26  | nogene     |
| chr16:71658232-71679535   | 73  | PHLPP2     |
| chr5:170919440-170968377  | 7   | RANBP17    |
| chr1:92320598-92345914    | 21  | RPAP2      |
| chr4:75967276-75971458    | 7   | SDAD1      |
| chr20:44509890-44514040   | 26  | SERINC3    |
| chr5:110638197-110642371  | 6   | TMEM232    |
| chr5:154924468-154936022  | 5   | GEMIN5     |
| chr5:179841906-179853437  | 16  | C5orf45    |
| chr16:14644273-14644609   | 85  | BFAR       |
| chr8:38247712-38252287    | 10  | DDHD2      |
| chr7:80798091-80805758    | 39  | SEMA3C     |
| chr20:25634048-25645648   | 105 | ZNF337-AS1 |
| chr12:31451939-31495919   | 16  | DENND5B    |
| chr3:142365046-142370620  | 7   | XRN1       |
| chr8:125102050-125102487  | 18  | NSMCE2     |



|                           |     |              |
|---------------------------|-----|--------------|
| chr2:37289355-37293271    | 8   | PRKD3        |
| chr1:179112308-179121867  | 8   | ABL2         |
| chr9:97994630-97998678    | 87  | ANP32B       |
| chr13:106557047-106559657 | 7   | ARGLU1       |
| chr22:17499409-17500735   | 4   | CECR2        |
| chr15:92948951-92967513   | 4   | CHD2         |
| chr22:38494020-38501280   | 16  | DDX17        |
| chr18:49329572-49333853   | 51  | DYM          |
| chr8:38424508-38426245    | 25  | FGFR1        |
| chr3:125027204-125029488  | 29  | HEG1         |
| chr11:119131534-119133219 | 96  | HINFP        |
| chr19:47416651-47417350   | 535 | MEIS3        |
| chr19:3205938-3206425     | 7   | NCLN         |
| chr10:73249187-73249967   | 24  | nogene       |
| chr3:28251711-28253765    | 4   | nogene       |
| chr14:96520054-96528006   | 50  | PAPOLA       |
| chr12:107743196-107746424 | 14  | PRDM4        |
| chr10:87875404-87933251   | 7   | PTEN         |
| chr15:75490207-75527261   | 30  | PTPN9        |
| chr2:86688231-86701949    | 6   | RNF103-CHMP3 |
| chr19:45686533-45687727   | 19  | SNRPD2       |
| chr1:112591524-112598086  | 7   | ST7L         |
| chr13:75349169-75359858   | 17  | TBC1D4       |
| chr2:218546220-218562813  | 14  | USP37        |
| chr2:218476839-218482234  | 9   | USP37        |
| chr19:57776542-57780146   | 32  | ZNF586       |
| chr2:111862388-111878971  | 15  | ANAPC1       |
| chr5:79619611-79623489    | 19  | PAPD4        |
| chr5:65291328-65473952    | 16  | ADAMTS6      |
| chr1:155415743-155477958  | 7   | ASH1L        |
| chr1:235494680-235496308  | 63  | B3GALNT2     |
| chr9:137790847-137800984  | 46  | EHMT1        |
| chr5:154033790-154034967  | 585 | FAM114A2     |
| chr3:9418732-9418882      | 8   | nogene       |
| chr16:50211322-50217663   | 11  | PAPD5        |
| chr13:79368729-79371930   | 10  | RBM26        |
| chr5:146233449-146237432  | 21  | RBM27        |
| chr22:40844838-40850880   | 20  | ST13         |
| chr8:39054480-39083073    | 5   | ADAM9        |
| chr4:73177379-73235080    | 43  | ANKRD17      |
| chr8:90017123-90036940    | 10  | DECR1        |
| chr3:197085579-197105005  | 7   | DLG1         |
| chr4:2662837-2663288      | 17  | FAM193A      |

|                           |     |          |
|---------------------------|-----|----------|
| chr2:69358328-69363670    | 29  | GFPT1    |
| chr8:41609415-41612960    | 8   | GPAT4    |
| chr17:44435064-44474903   | 6   | GPATCH8  |
| chr19:41276158-41281275   | 6   | HNRNPUL1 |
| chr8:94534838-94543942    | 55  | KIAA1429 |
| chr1:10275427-10282533    | 8   | KIF1B    |
| chr15:67585889-67600749   | 9   | MAP2K5   |
| chr22:21788256-21799128   | 11  | MAPK1    |
| chr6:43617842-43618265    | 20  | nogene   |
| chr15:56827523-56850186   | 16  | nogene   |
| chr9:128469182-128473741  | 10  | ODF2     |
| chr1:7962762-7970963      | 12  | PARK7    |
| chr4:39841947-39845880    | 128 | PDS5A    |
| chr20:35869437-35871829   | 34  | PHF20    |
| chr1:119721169-119727102  | 9   | PHGDH    |
| chr8:140846598-140879637  | 12  | PTK2     |
| chr2:20278582-20283486    | 10  | PUM2     |
| chr1:243330539-243344331  | 10  | SDCCAG8  |
| chr1:100007033-100017815  | 9   | SLC35A3  |
| chr8:141215758-141221765  | 7   | SLC45A4  |
| chr3:27404829-27421779    | 10  | SLC4A7   |
| chr18:47851273-47896809   | 10  | SMAD2    |
| chr17:31940285-31966196   | 63  | SUZ12    |
| chr22:46891265-46894846   | 5   | TBC1D22A |
| chr5:72877227-72883232    | 35  | TNPO1    |
| chr2:9587413-9591515      | 37  | YWHAQ    |
| chr1:32226170-32226530    | 76  | EIF3I    |
| chr16:16086823-16102717   | 23  | ABCC1    |
| chr5:65273339-65300131    | 9   | ADAMTS6  |
| chr19:32625873-32626827   | 11  | ANKRD27  |
| chr14:57274243-57274889   | 11  | AP5M1    |
| chr4:40890363-40893411    | 114 | APBB2    |
| chr11:108327644-108332037 | 57  | ATM      |
| chr16:28887188-28887722   | 9   | ATP2A1   |
| chr15:83041727-83050178   | 23  | BTBD1    |
| chr17:39490556-39494694   | 8   | CDK12    |
| chr2:36476888-36522313    | 11  | CRIM1    |
| chr20:505117-508660       | 11  | CSNK2A1  |
| chr18:48663751-48670744   | 45  | CTIF     |
| chr17:4149890-4154860     | 7   | CYB5D2   |
| chr15:65478879-65480399   | 15  | DPP8     |
| chr1:50567076-50596216    | 231 | FAF1     |
| chr16:50083936-50086351   | 11  | HEATR3   |

|                           |     |         |
|---------------------------|-----|---------|
| chr1:113544664-113622994  | 6   | MAGI3   |
| chr1:93114687-93115618    | 19  | MTF2    |
| chr19:47500632-47503502   | 6   | NAPA    |
| chr2:15551492-15558634    | 322 | NBAS    |
| chr2:182994838-183023916  | 5   | NCKAP1  |
| chr2:239990073-240022340  | 103 | NDUFA10 |
| chr15:73116539-73136027   | 11  | NEO1    |
| chr17:28168447-28185265   | 13  | NLK     |
| chr1:246437147-246440124  | 52  | nogene  |
| chr17:31327648-31358632   | 15  | nogene  |
| chr3:195245088-195245270  | 18  | nogene  |
| chr1:179113081-179113668  | 7   | nogene  |
| chr10:119662357-119662730 | 4   | nogene  |
| chr10:91240483-91251440   | 9   | PCGF5   |
| chr3:196722414-196728136  | 5   | PIGX    |
| chr8:47929091-47935058    | 11  | PRKDC   |
| chr15:78544868-78545764   | 77  | PSMA4   |
| chr5:170878096-170881896  | 30  | RANBP17 |
| chr6:33294687-33295045    | 6   | RGL2    |
| chr5:95763507-95788858    | 10  | RHOBTB3 |
| chr3:149872028-149921227  | 28  | RNF13   |
| chr7:5725323-5739352      | 8   | RNF216  |
| chr6:106619201-106622969  | 15  | RTN4IP1 |
| chr5:179575240-179577136  | 5   | RUFY1   |
| chr10:68393137-68401737   | 50  | RUFY2   |
| chrX:129488936-129499841  | 8   | SMARCA1 |
| chr22:40840625-40850880   | 50  | ST13    |
| chr1:166862202-166863921  | 45  | TADA1   |
| chr6:121160009-121170527  | 14  | TBC1D32 |
| chr6:133982567-133984671  | 21  | TBPL1   |
| chr11:8621343-8621644     | 8   | TRIM66  |
| chr11:102114143-102162571 | 11  | YAP1    |
| chr4:182914922-182915575  | 182 | DCTD    |
| chr15:59668891-59680308   | 5   | BNIP2   |
| chr7:152783186-152825122  | 35  | ACTR3B  |
| chr15:58665096-58682314   | 7   | ADAM10  |
| chr17:19939712-19963022   | 7   | AKAP10  |
| chr12:99772921-99825389   | 34  | ANKS1B  |
| chr2:9318523-9323250      | 9   | ASAP2   |
| chr2:9344531-9350895      | 20  | ASAP2   |
| chr8:61637946-61646878    | 8   | ASPH    |
| chr8:61642887-61684188    | 7   | ASPH    |
| chr3:11358417-11362928    | 12  | ATG7    |

|                           |     |           |
|---------------------------|-----|-----------|
| chr22:45736967-45807022   | 15  | ATXN10    |
| chr2:110666262-110674365  | 16  | BUB1      |
| chr11:76496214-76523291   | 11  | C11orf30  |
| chr4:80321340-80362884    | 30  | C4orf22   |
| chr15:44413335-44414615   | 30  | CASC4     |
| chr16:2439352-2445622     | 11  | CCNF      |
| chr5:138319218-138331686  | 7   | CDC25C    |
| chr10:60780140-60785787   | 9   | CDK1      |
| chrX:101101057-101102411  | 10  | CENPI     |
| chr18:13087016-13096307   | 8   | CEP192    |
| chr16:53267293-53268126   | 23  | CHD9      |
| chr22:28694031-28699937   | 13  | CHEK2     |
| chr3:32483931-32491886    | 14  | CMTM6     |
| chr6:154422505-154442290  | 5   | CNKS3     |
| chr12:51067672-51067969   | 14  | CSRN2     |
| chr12:31423596-31433248   | 13  | DENND5B   |
| chr3:197081050-197085756  | 26  | DLG1      |
| chr1:65364634-65366196    | 324 | DNAJC6    |
| chr22:31420255-31423410   | 8   | DRG1      |
| chr6:56699652-56735289    | 80  | DST       |
| chr11:86249470-86252240   | 10  | EED       |
| chr8:131940498-131959663  | 16  | EFR3A     |
| chr15:82151464-82152423   | 13  | EFTUD1    |
| chr15:39972907-39976844   | 8   | EIF2AK4   |
| chr22:31454143-31463133   | 10  | EIF4ENIF1 |
| chr19:41389764-41392980   | 7   | EXOSC5    |
| chr9:93471140-93532329    | 8   | FAM120A   |
| chr2:222613810-222624775  | 12  | FARSB     |
| chr2:47832963-47834711    | 7   | FBXO11    |
| chr8:431340-435707        | 89  | FBXO25    |
| chrX:147940575-147945616  | 47  | FMR1      |
| chr9:20819795-20885230    | 40  | FOCAD     |
| chr9:20778680-20789608    | 21  | FOCAD     |
| chrX:107526581-107530511  | 9   | FRMPD3    |
| chr6:29621100-29624024    | 8   | GABBR1    |
| chr2:75665928-75672016    | 14  | GCFC2     |
| chr12:120177446-120178950 | 9   | GCN1      |
| chr17:65053501-65053728   | 17  | GNA13     |
| chr1:109573736-109586882  | 12  | GNAI3     |
| chr5:181238098-181241639  | 18  | GNB2L1    |
| chr6:117566853-117579064  | 11  | GOPC      |
| chr16:27494762-27495492   | 8   | GTF3C1    |
| chr10:67966682-68014186   | 123 | HERC4     |

|                           |    |          |
|---------------------------|----|----------|
| chr11:33338756-33341686   | 36 | HIPK3    |
| chr5:133067416-133070496  | 7  | HSPA4    |
| chr1:43451427-43452319    | 21 | HYI      |
| chr8:94824892-94829026    | 8  | INTS8    |
| chr11:9433569-9442197     | 20 | IPO7     |
| chr16:71920738-71923380   | 11 | IST1     |
| chr8:94491577-94491909    | 81 | KIAA1429 |
| chr16:48256609-48262872   | 12 | LONP2    |
| chr17:50736959-50741731   | 80 | LUC7L3   |
| chr2:8943186-8958642      | 13 | MBOAT2   |
| chr2:31917925-31956598    | 27 | MEMO1    |
| chr2:111944959-111947567  | 29 | MERTK    |
| chr5:80678926-80728965    | 13 | MSH3     |
| chr6:31741162-31747432    | 26 | MSH5     |
| chr6:75873206-75880120    | 11 | MYO6     |
| chr17:16137310-16139186   | 18 | NCOR1    |
| chr9:122148111-122152408  | 45 | NDUFA8   |
| chr16:28958716-28959100   | 6  | NFATC2IP |
| chr22:37587762-37588446   | 7  | nogene   |
| chr2:98462383-98462581    | 7  | nogene   |
| chr9:2720343-2783594      | 9  | nogene   |
| chr5:134775752-134776142  | 5  | nogene   |
| chr5:138360870-138362040  | 5  | nogene   |
| chr12:87707646-87721292   | 5  | nogene   |
| chr14:34647791-34648300   | 6  | nogene   |
| chr17:13892724-13933185   | 7  | nogene   |
| chr19:58420326-58421474   | 7  | nogene   |
| chr9:593608-594080        | 11 | nogene   |
| chr22:37881672-37882024   | 5  | nogene   |
| chr3:136331500-136331826  | 9  | nogene   |
| chr4:128291799-128303035  | 8  | nogene   |
| chr1:27243474-27243877    | 15 | nogene   |
| chr4:2953510-2956811      | 13 | NOP14    |
| chr8:125102050-125195272  | 13 | NSMCE2   |
| chr7:33015669-33035988    | 8  | NT5C3A   |
| chr2:200925835-200933974  | 19 | ORC2     |
| chr3:125578959-125582978  | 7  | OSBPL11  |
| chr13:24477700-24484748   | 80 | PARP4    |
| chr1:233198938-233218184  | 21 | PCNXL2   |
| chr10:103405984-103406790 | 7  | PDCD11   |
| chr1:148977936-148981397  | 13 | PDE4DIP  |
| chr16:2577424-2586893     | 27 | PDPK1    |
| chr12:7190361-7203551     | 7  | PEX5     |

|                           |      |          |
|---------------------------|------|----------|
| chr11:581491-582081       | 7    | PHRF1    |
| chr11:68519500-68545024   | 17   | PPP6R3   |
| chr11:68519500-68558679   | 21   | PPP6R3   |
| chr7:105457761-105468463  | 6    | PUS7     |
| chr10:98186466-98209899   | 6    | R3HCC1L  |
| chr2:135120818-135127662  | 9    | RAB3GAP1 |
| chr3:158122102-158132263  | 15   | RSRC1    |
| chr12:123345257-123350441 | 37   | SBNO1    |
| chr6:154808069-154818592  | 15   | SCAF8    |
| chr7:101127244-101128368  | 16   | SERPINE1 |
| chr3:52920536-52928341    | 10   | SFMBT1   |
| chr3:52911002-52916214    | 9    | SFMBT1   |
| chr10:7248547-7285954     | 29   | SFMBT2   |
| chr15:75409835-75422823   | 5    | SIN3A    |
| chr12:40018845-40048210   | 9    | SLC2A13  |
| chr1:100912111-100918127  | 7    | SLC30A7  |
| chr9:33068823-33073806    | 16   | SMU1     |
| chr5:139276120-139279129  | 10   | SNHG4    |
| chr4:185310634-185346650  | 8    | SNX25    |
| chr2:45599448-45605441    | 8    | SRBD1    |
| chr1:47260288-47260539    | 7    | STIL     |
| chr4:26666332-26688407    | 8    | TBC1D19  |
| chr5:179891378-179894614  | 5    | TBC1D9B  |
| chr5:150367843-150369602  | 19   | TCOF1    |
| chr3:100732507-100736716  | 12   | TFG      |
| chr10:49952125-49958480   | 129  | TIMM23B  |
| chr8:70583163-70583793    | 26   | TRAM1    |
| chr21:44063537-44076628   | 7    | TRAPPC10 |
| chr3:142748257-142762313  | 11   | TRPC1    |
| chr9:33948373-33948587    | 85   | UBAP2    |
| chr9:111924776-111931357  | 8    | UGCG     |
| chr2:128127360-128134961  | 6    | UGGT1    |
| chr1:151184316-151185950  | 5    | VPS72    |
| chrX:118442243-118444494  | 23   | WDR44    |
| chr2:61520390-61533903    | 7    | XPO1     |
| chr5:133006758-133022906  | 18   | ZCCHC10  |
| chr6:157632833-157653627  | 15   | ZDHHC14  |
| chr10:31373017-31502509   | 61   | ZEB1     |
| chr20:41238687-41269083   | 25   | ZHX3     |
| chr1:35381258-35381758    | 47   | ZMYM4    |
| chr1:247156999-247159813  | 484  | ZNF124   |
| chr3:125313307-125331238  | 1027 | ZNF148   |
| chr18:76849525-76875664   | 76   | ZNF236   |

|                           |    |         |
|---------------------------|----|---------|
| chr2:71363152-71370005    | 87 | ZNF638  |
| chrX:47842649-47895940    | 5  | ZNF81   |
| chr14:102325984-102331846 | 11 | ZNF839  |
| chr1:28987430-28997319    | 14 | EPB41   |
| chr8:119788789-119797846  | 14 | TAF2    |
| chr2:203416907-203427269  | 10 | ABI2    |
| chr2:9526110-9536828      | 5  | ADAM17  |
| chr17:81889993-81890688   | 10 | ALYREF  |
| chr17:61776400-61808757   | 13 | BRIP1   |
| chr2:61876094-61880394    | 24 | CCT4    |
| chr5:138781922-138827718  | 39 | CTNNA1  |
| chr7:6424751-6426114      | 10 | DAGLB   |
| chr10:68959805-68962157   | 13 | DDX21   |
| chr3:108669680-108677598  | 9  | DZIP3   |
| chr6:158776407-158789371  | 19 | EZR     |
| chr2:241403827-241434321  | 11 | FARP2   |
| chr6:109715077-109716568  | 35 | FIG4    |
| chr1:240392510-240438210  | 11 | FMN2    |
| chr16:81351582-81365478   | 14 | GAN     |
| chr1:153811730-153813452  | 67 | GATAD2B |
| chr3:142170324-142177576  | 8  | GK5     |
| chr10:130166506-130169490 | 14 | GLRX3   |
| chr1:155820605-155827028  | 51 | GON4L   |
| chr11:77978995-77981576   | 5  | INTS4   |
| chr12:122546175-122547969 | 52 | KNTC1   |
| chr16:20911182-20915714   | 6  | LYRM1   |
| chr7:2013083-2014642      | 13 | MAD1L1  |
| chr18:21791373-21819646   | 13 | MIB1    |
| chr6:24405167-24418578    | 29 | MRS2    |
| chr14:64431531-64439172   | 33 | MTHFD1  |
| chr4:17814852-17831116    | 4  | NCAPG   |
| chr17:16158759-16165161   | 20 | NCOR1   |
| chr6:85494748-85495026    | 16 | nogene  |
| chr4:23120319-23122436    | 14 | nogene  |
| chrX:131777622-131785258  | 46 | nogene  |
| chr10:11834281-11834450   | 12 | nogene  |
| chrX:63722761-63743446    | 6  | nogene  |
| chr10:87709195-87727489   | 8  | PAPSS2  |
| chr17:1548295-1553149     | 39 | PITPNA  |
| chr12:42374637-42375074   | 10 | PPHLN1  |
| chr8:140743229-140752316  | 7  | PTK2    |
| chr20:2923206-2965202     | 41 | PTPRA   |
| chr13:79377378-79378907   | 10 | RBM26   |

|                           |     |        |
|---------------------------|-----|--------|
| chr7:105563732-105565648  | 20  | RINT1  |
| chr18:61816033-61816598   | 11  | RNF152 |
| chr15:76795279-76862533   | 12  | SCAPER |
| chr16:30707182-30707712   | 11  | SRCAP  |
| chr13:47988540-47988981   | 19  | SUCLA2 |
| chr2:101027382-101033758  | 5   | TBC1D8 |
| chr10:95682650-95684624   | 14  | TCTN3  |
| chr14:89966146-89993483   | 8   | TDP1   |
| chr7:5356915-5359569      | 10  | TNRC18 |
| chr18:24019859-24083081   | 9   | TTC39C |
| chr13:51703595-51739175   | 14  | WDFY2  |
| chr2:28906459-28929710    | 10  | WDR43  |
| chr6:43555835-43573601    | 7   | XPO5   |
| chr9:92855810-92856318    | 15  | ZNF484 |
| chr2:135313488-135345635  | 30  | ZRANB3 |
| chr11:93721311-93722050   | 14  | CEP295 |
| chr3:71690009-71699708    | 13  | EIF4E3 |
| chr2:219212386-219215082  | 8   | ABCB6  |
| chr7:36410513-36420314    | 8   | ANLN   |
| chr12:1236768-1290012     | 7   | ERC1   |
| chr6:617710-637861        | 25  | EXOC2  |
| chr16:67544298-67544830   | 7   | FAM65A |
| chr16:53879843-53888951   | 77  | FTO    |
| chr4:173292107-173304118  | 9   | GALNT7 |
| chr22:38715906-38717000   | 14  | GTPBP1 |
| chr2:43905691-43918398    | 11  | LRPPRC |
| chr6:136592172-136622981  | 8   | MAP3K5 |
| chr17:75611658-75611865   | 4   | MYO15B |
| chr10:125074742-125122868 | 6   | nogene |
| chr15:62428902-62429322   | 12  | nogene |
| chr11:20127830-20130385   | 5   | nogene |
| chr15:85075861-85098036   | 8   | PDE8A  |
| chr9:36352741-36353331    | 162 | RNF38  |
| chr22:24567983-24572061   | 7   | SNRPD3 |
| chr16:89544647-89550609   | 6   | SPG7   |
| chr16:84758715-84768358   | 7   | USP10  |
| chr8:99142973-99193057    | 7   | VPS13B |
| chr4:42616032-42627109    | 7   | ATP8A1 |
| chr19:45421177-45421393   | 33  | ERCC1  |
| chr15:72345445-72356617   | 9   | HEXA   |
| chr2:173692683-173698482  | 7   | nogene |
| chr7:17814833-17840000    | 11  | SNX13  |
| chr2:43960540-43963706    | 11  | LRPPRC |



|                           |     |                 |
|---------------------------|-----|-----------------|
| chr18:36576450-36602768   | 17  | FHOD3           |
| chr6:13639562-13652681    | 4   | RANBP9          |
| chrX:75098941-75114831    | 9   | ABCB7           |
| chr16:3988993-3993510     | 42  | ADCY9           |
| chr5:77034417-77039719    | 33  | AGGF1           |
| chr6:131145284-131169273  | 145 | AKAP7           |
| chr5:140440118-140449305  | 239 | ANKHD1-EIF4EBP3 |
| chr7:36406180-36411166    | 20  | ANLN            |
| chr5:78089392-78129307    | 97  | AP3B1           |
| chr4:41013582-41033304    | 41  | APBB2           |
| chr11:129093620-129127305 | 21  | ARHGAP32        |
| chr8:123361191-123361646  | 5   | ATAD2           |
| chr3:11331339-11342279    | 18  | ATG7            |
| chr12:89609936-89617039   | 7   | ATP2B1          |
| chr10:102023476-102033339 | 24  | C10orf76        |
| chr11:66821642-66828364   | 65  | C11orf80        |
| chr4:128017362-128028853  | 27  | C4orf29         |
| chr20:33360350-33372697   | 6   | CDK5RAP1        |
| chr16:53247292-53254605   | 7   | CHD9            |
| chr4:55475962-55510065    | 31  | CLOCK           |
| chr7:135393917-135398226  | 11  | CNOT4           |
| chr10:35044565-35054539   | 8   | CUL2            |
| chrX:19950752-19955506    | 9   | CXorf23         |
| chrX:19929784-19936629    | 4   | CXorf23         |
| chr4:182877510-182894605  | 4   | DCTD            |
| chr4:51863436-51886638    | 141 | DCUN1D4         |
| chr15:65722847-65741784   | 9   | DENND4A         |
| chr1:26457790-26460144    | 18  | DHDDS           |
| chr7:754588-775162        | 13  | DNAAF5          |
| chr15:65487689-65500779   | 7   | DPP8            |
| chr15:65507242-65512564   | 23  | DPP8            |
| chr3:121844452-121872788  | 23  | EAF2            |
| chr1:21272698-21290156    | 107 | ECE1            |
| chr12:53016472-53020026   | 50  | EIF4B           |
| chr1:44284834-44339322    | 94  | ERI3            |
| chr4:5565257-5584850      | 20  | EVC2            |
| chr9:93543221-93550691    | 9   | FAM120A         |
| chr5:137985256-138011149  | 13  | FAM13B          |
| chr10:15796099-15834616   | 5   | FAM188A         |
| chr1:179043714-179054638  | 115 | FAM20B          |
| chr1:77783237-77807101    | 7   | FAM73A          |
| chr16:89791402-89792547   | 17  | FANCA           |
| chr14:45148836-45170746   | 7   | FANCM           |

|                           |     |           |
|---------------------------|-----|-----------|
| chr17:75931228-75938232   | 8   | FBF1      |
| chr12:132508152-132527988 | 42  | FBRSL1    |
| chr5:73074741-73078312    | 8   | FCHO2     |
| chrX:131755597-131785258  | 20  | FIRRE     |
| chr3:172251259-172298787  | 9   | FNDC3B    |
| chr14:65629491-65669480   | 11  | FUT8      |
| chr2:232700584-232761436  | 8   | GIGYF2    |
| chr10:94588228-94594854   | 25  | HELLS     |
| chr10:67939587-67941105   | 108 | HERC4     |
| chr1:87072933-87097935    | 9   | HS2ST1    |
| chr2:186638276-186641588  | 5   | ITGAV     |
| chr17:6628116-6628741     | 7   | KIAA0753  |
| chr1:10271501-10275503    | 30  | KIF1B     |
| chr7:98137314-98154876    | 29  | LMTK2     |
| chr2:242114638-242138888  | 9   | LOC728323 |
| chr3:197835673-197839397  | 12  | LRCH3     |
| chr11:68416327-68426187   | 8   | LRP5      |
| chr12:12158828-12165295   | 16  | LRP6      |
| chr5:109804153-109823837  | 6   | MAN2A1    |
| chr3:47870812-47877523    | 6   | MAP4      |
| chr3:50640365-50642332    | 73  | MAPKAPK3  |
| chr2:85541082-85543034    | 10  | MAT2A     |
| chr2:8877029-8908716      | 16  | MBOAT2    |
| chr17:61965005-61968258   | 16  | MED13     |
| chr9:36583626-36589652    | 8   | MELK      |
| chr18:21768622-21773728   | 7   | MIB1      |
| chr1:11121094-11122126    | 8   | MTOR      |
| chr3:172645622-172648034  | 8   | NCEH1     |
| chr2:182952404-182967361  | 11  | NCKAP1    |
| chr20:34727258-34736758   | 150 | NCOA6     |
| chr17:16064869-16068121   | 12  | NCOR1     |
| chr18:79448781-79451816   | 61  | NFATC1    |
| chr4:102533844-102567135  | 25  | NFKB1     |
| chr15:77361314-77388802   | 60  | nogene    |
| chr6:126111218-126174911  | 8   | nogene    |
| chrX:65366637-65368998    | 46  | nogene    |
| chr2:95148884-95159373    | 8   | nogene    |
| chr10:45059386-45092468   | 9   | nogene    |
| chr7:152652489-152652750  | 6   | nogene    |
| chr14:74298569-74299794   | 7   | nogene    |
| chr5:69504176-69514109    | 6   | OCLN      |
| chr10:34359146-34384254   | 39  | PARD3     |
| chr13:24469023-24478276   | 29  | PARP4     |

|                           |    |         |
|---------------------------|----|---------|
| chr5:58988492-58993465    | 47 | PDE4D   |
| chr11:34947505-34960518   | 10 | PDHX    |
| chr1:31630549-31635522    | 9  | PEF1    |
| chr7:11013746-11028818    | 17 | PHF14   |
| chr11:85981128-85990399   | 26 | PICALM  |
| chr18:62082672-62095950   | 9  | PIGN    |
| chr3:138698906-138714719  | 5  | PIK3CB  |
| chr1:151242122-151242567  | 23 | PIP5K1A |
| chr1:88784638-88786213    | 33 | PKN2    |
| chr2:43712224-43741043    | 24 | PLEKHH2 |
| chr7:43965866-43973323    | 9  | POLR2J4 |
| chr7:124863349-124863640  | 11 | POT1    |
| chr2:28776850-28799433    | 7  | PPP1CB  |
| chr5:134199085-134202021  | 9  | PPP2CA  |
| chr8:26360168-26363890    | 5  | PPP2R2A |
| chr4:101093775-101109078  | 26 | PPP3CA  |
| chr12:107739382-107746424 | 6  | PRDM4   |
| chr8:140686631-140706205  | 14 | PTK2    |
| chr11:112230230-112230595 | 4  | PTS     |
| chr1:30981311-30995220    | 9  | PUM1    |
| chr2:120278614-120289757  | 13 | RALB    |
| chr3:141501948-141529802  | 5  | RASA2   |
| chr20:37035241-37055656   | 13 | RBL1    |
| chr4:3316069-3343053      | 39 | RGS12   |
| chr2:3575888-3576460      | 6  | RPS7    |
| chr18:70121555-70128546   | 29 | RTTN    |
| chr10:70153837-70161069   | 5  | SAR1A   |
| chr11:10188348-10193987   | 11 | SBF2    |
| chr3:195668518-195673987  | 6  | SDHAP2  |
| chr12:48071666-48096427   | 12 | SENP1   |
| chr3:185614563-185617611  | 5  | SENP2   |
| chr3:47086194-47106120    | 28 | SETD2   |
| chr9:132300629-132311856  | 8  | SETX    |
| chr11:111616242-111620402 | 7  | SIK2    |
| chr5:55340009-55366875    | 10 | SKIV2L2 |
| chr12:40028300-40085700   | 25 | SLC2A13 |
| chr4:102304316-102324998  | 12 | SLC39A8 |
| chr15:64974601-64981025   | 11 | SPG21   |
| chr6:36496710-36507602    | 5  | STK38   |
| chr12:15889927-15895496   | 11 | STRAP   |
| chr14:30935162-30956242   | 73 | STRN3   |
| chr14:30918965-30956242   | 5  | STRN3   |
| chr6:149342684-149370099  | 17 | TAB2    |

|                           |     |           |
|---------------------------|-----|-----------|
| chr3:129880308-129880559  | 119 | TMCC1     |
| chr21:33455726-33468926   | 16  | TMEM50B   |
| chr10:133297951-133302980 | 7   | TUBGCP2   |
| chr15:70687539-70699660   | 20  | UACA      |
| chr1:162499954-162518190  | 7   | UHMK1     |
| chr10:11964008-12014184   | 9   | UPF2      |
| chr17:21006895-21012935   | 16  | USP22     |
| chr15:63532646-63558188   | 18  | USP3      |
| chr8:99467413-99481802    | 19  | VPS13B    |
| chr4:84702352-84717016    | 7   | WDFY3     |
| chr1:32631826-32634792    | 83  | ZBTB80S   |
| chrX:65497131-65499989    | 8   | ZC3H12B   |
| chr1:247157083-247159813  | 13  | ZNF124    |
| chr19:53074139-53075183   | 27  | ZNF160    |
| chr7:30355727-30366295    | 70  | ZNRF2     |
| chr10:84417770-84477664   | 148 | CCSER2    |
| chrX:101145063-101148161  | 8   | CENPI     |
| chr5:149507026-149513209  | 11  | CSNK1A1   |
| chr3:179378340-179392104  | 8   | MFN1      |
| chr6:75855138-75858993    | 5   | MYO6      |
| chr1:151017811-151027327  | 5   | PRUNE     |
| chr12:50004234-50006636   | 12  | RACGAP1   |
| chr3:155833467-155842619  | 69  | SLC33A1   |
| chr1:168291159-168308877  | 5   | TBX19     |
| chr8:91018389-91024366    | 31  | TMEM55A   |
| chr16:89224718-89225631   | 7   | ZNF778    |
| chr16:70269783-70270195   | 28  | AARS      |
| chr7:16624982-16636455    | 54  | ANKMY2    |
| chr1:227112311-227112913  | 18  | CDC42BPA  |
| chr13:60008543-60042820   | 20  | DIAPH3    |
| chr1:50655441-50744775    | 40  | FAF1      |
| chr7:4740837-4747179      | 7   | FOXK1     |
| chr7:130116444-130127451  | 10  | KLHDC10   |
| chr17:64751806-64764548   | 6   | LOC146880 |
| chr3:47998637-47998879    | 18  | MAP4      |
| chr5:163456928-163457610  | 7   | NUDCD2    |
| chr9:2096656-2123937      | 5   | SMARCA2   |
| chr6:42612170-42632904    | 15  | UBR2      |
| chr5:83104909-83111203    | 24  | XRCC4     |
| chr10:31461036-31461237   | 82  | ZEB1      |
| chr7:105038125-105081797  | 9   | KMT2E     |
| chr9:36657240-36674937    | 6   | MELK      |
| chr18:36198689-36200324   | 8   | MOCOS     |

|                           |     |          |
|---------------------------|-----|----------|
| chr14:20344931-20346913   | 31  | PARP2    |
| chr12:72618890-72621751   | 9   | TRHDE    |
| chr19:29980158-29986417   | 89  | URI1     |
| chr21:31700994-31706357   | 19  | SCAF4    |
| chr12:111729805-111734068 | 10  | ACAD10   |
| chr5:65260599-65273443    | 8   | ADAMTS6  |
| chr4:40890363-40945070    | 25  | APBB2    |
| chr11:120440128-120445464 | 36  | ARHGEF12 |
| chr11:34079627-34089456   | 16  | CAPRIN1  |
| chr3:138570317-138572914  | 10  | CEP70    |
| chr16:53235184-53254605   | 6   | CHD9     |
| chr3:32703867-32708820    | 20  | CNOT10   |
| chr6:170388286-170404601  | 8   | FAM120B  |
| chr5:135369405-135389126  | 7   | H2AFY    |
| chr14:31144110-31172122   | 8   | HECTD1   |
| chr17:31349119-31374129   | 8   | NF1      |
| chr19:3003977-3004406     | 9   | nogene   |
| chr10:17597445-17597992   | 16  | nogene   |
| chr1:32674937-32679078    | 9   | nogene   |
| chr9:109426949-109438234  | 20  | PTPN3    |
| chr7:66771882-66795592    | 36  | RABGEF1  |
| chrX:20186295-20204103    | 9   | RPS6KA3  |
| chr1:243316754-243378863  | 9   | SDCCAG8  |
| chr2:229807707-229811045  | 8   | TRIP12   |
| chr19:29985222-30012531   | 16  | URI1     |
| chr6:144531051-144542870  | 9   | UTRN     |
| chr2:202884197-202896219  | 9   | WDR12    |
| chr17:36988518-36990857   | 10  | AATF     |
| chr1:155408141-155415923  | 36  | ASH1L    |
| chr3:129267936-129275292  | 5   | COPG1    |
| chr6:149632758-149638560  | 121 | KATNA1   |
| chr1:153682497-153685084  | 10  | NPR1     |
| chr11:3775881-3782145     | 12  | NUP98    |
| chr8:73738283-73739868    | 11  | STAU2    |
| chr12:2994737-3022017     | 30  | TEAD4    |
| chr17:41907598-41908988   | 4   | ACLY     |
| chr2:157799426-157818559  | 39  | ACVR1    |
| chr12:1744521-1754514     | 13  | ADIPOR2  |
| chr16:56385918-56414344   | 62  | AMFR     |
| chr7:36399078-36415884    | 12  | ANLN     |
| chr10:121898840-121924329 | 28  | ATE1     |
| chr2:105342847-105343223  | 19  | C2orf49  |
| chr18:23234607-23237245   | 23  | CABLES1  |

|                           |     |           |
|---------------------------|-----|-----------|
| chr2:27237378-27239798    | 10  | CAD       |
| chr4:113500462-113517657  | 20  | CAMK2D    |
| chr5:179707131-179709059  | 131 | CANX      |
| chr11:119273867-119276134 | 11  | CBL       |
| chr21:29060540-29071988   | 4   | CCT8      |
| chr1:227160542-227317246  | 10  | CDC42BPA  |
| chrX:18575353-18588143    | 8   | CDKL5     |
| chr19:54142928-54153840   | 7   | CNOT3     |
| chr12:56282419-56286645   | 13  | CS        |
| chr11:107348936-107392895 | 7   | CWF19L2   |
| chr11:103066268-103089318 | 8   | DCUN1D5   |
| chr20:49233305-49236510   | 15  | DDX27     |
| chr11:118758773-118763306 | 19  | DDX6      |
| chr9:123557569-123609481  | 7   | DENND1A   |
| chr18:49257009-49272303   | 8   | DYM       |
| chr3:32544875-32545965    | 16  | DYNC1LI1  |
| chr12:1289851-1290012     | 116 | ERC1      |
| chr12:56133416-56134428   | 25  | ESYT1     |
| chr11:72849754-72889945   | 8   | FCHSD2    |
| chr16:4822874-4843602     | 5   | GLYR1     |
| chr1:45642426-45659142    | 4   | GPBP1L1   |
| chr1:41628748-41646243    | 10  | HIVEP3    |
| chr3:160277305-160282613  | 7   | IFT80     |
| chr13:30227411-30280223   | 11  | KATNAL1   |
| chr5:138375092-138381590  | 17  | KDM3B     |
| chr3:183671033-183672484  | 5   | KLHL24    |
| chr4:87170078-87195690    | 20  | KLHL8     |
| chr17:19093464-19219475   | 10  | LOC388436 |
| chr2:8939820-8958642      | 52  | MBOAT2    |
| chr9:20448122-20456786    | 20  | MLLT3     |
| chr21:25597301-25599866   | 13  | MRPL39    |
| chr2:42682400-42682589    | 6   | MTA3      |
| chr2:191329934-191364276  | 4   | MYO1B     |
| chr16:15672689-15677949   | 12  | NDE1      |
| chr13:32444544-32445017   | 4   | nogene    |
| chr17:30733942-30734223   | 8   | nogene    |
| chr7:106489906-106491130  | 15  | nogene    |
| chr12:79666512-79668408   | 9   | nogene    |
| chr20:3784967-3785142     | 32  | nogene    |
| chr1:187254375-187255868  | 4   | nogene    |
| chr21:34102834-34103519   | 8   | nogene    |
| chr8:78933742-78943071    | 8   | nogene    |
| chr1:1819474-1820143      | 7   | nogene    |

|                          |     |          |
|--------------------------|-----|----------|
| chr5:179957412-179957909 | 7   | nogene   |
| chr5:6604137-6605408     | 140 | NSUN2    |
| chr14:31599288-31673574  | 5   | NUBPL    |
| chr5:37301436-37318085   | 4   | NUP155   |
| chr10:73014223-73047101  | 13  | P4HA1    |
| chr10:34399329-34450448  | 7   | PARD3    |
| chr4:39904039-39925933   | 23  | PDS5A    |
| chr18:46775489-46821072  | 46  | PIAS2    |
| chr3:138683677-138688974 | 16  | PIK3CB   |
| chr19:14450317-14452023  | 28  | PKN1     |
| chr5:90487999-90497706   | 10  | POLR3G   |
| chr7:105481051-105482440 | 21  | PUS7     |
| chr2:135089650-135093693 | 20  | RAB3GAP1 |
| chr5:168488601-168495436 | 45  | RARS     |
| chr15:64748418-64750381  | 8   | RBPM52   |
| chr4:76996424-77020670   | 10  | 11-Sep   |
| chr1:86715723-86722673   | 10  | SH3GLB1  |
| chr11:57488915-57494171  | 5   | SLC43A1  |
| chr7:17834051-17850964   | 5   | SNX13    |
| chr14:50129960-50130762  | 8   | SOS2     |
| chr1:23971849-23978817   | 4   | SRSF10   |
| chr3:136604308-136604473 | 33  | STAG1    |
| chr4:38089931-38118192   | 33  | TBC1D1   |
| chr10:94510090-94522453  | 21  | TBC1D12  |
| chr7:5361593-5362825     | 8   | TNRC18   |
| chr4:188101055-188105587 | 27  | TRIML2   |
| chr15:42950261-42966286  | 202 | UBR1     |
| chr8:102329089-102345545 | 24  | UBR5     |
| chr17:60265411-60345608  | 6   | USP32    |
| chr17:78812859-78820012  | 20  | USP36    |
| chr2:218495759-218498157 | 5   | USP37    |
| chr7:93252652-93311272   | 6   | VPS50    |
| chr3:184824544-184826231 | 8   | VPS8     |
| chrX:152963838-152970541 | 4   | ZNF185   |
| chr7:100075134-100079656 | 12  | ZNF3     |
| chr6:57182031-57184225   | 15  | BAG2     |
| chr3:122740257-122741113 | 5   | HSPBAP1  |
| chr17:49041377-49042377  | 75  | IGF2BP1  |
| chr11:70330172-70339306  | 18  | PPFIA1   |
| chr6:107929414-107931314 | 30  | SEC63    |
| chr4:39224883-39232272   | 8   | WDR19    |
| chr19:5648988-5649499    | 7   | SAFB     |
| chr8:125102050-125151277 | 8   | NSMCE2   |

|                           |     |          |
|---------------------------|-----|----------|
| chr1:97679094-97699547    | 58  | DPYD     |
| chr7:30598795-30603572    | 17  | GARS     |
| chr8:22414779-22416280    | 7   | SLC39A14 |
| chr7:6697338-6705223      | 35  | ZNF12    |
| chr5:65224319-65226219    | 309 | ADAMTS6  |
| chr14:39308448-39327022   | 13  | CTAGE5   |
| chr1:225002782-225097239  | 16  | DNAH14   |
| chr1:108885274-108904254  | 15  | GPSM2    |
| chr12:12244261-12244655   | 732 | LRP6     |
| chr6:89745272-89750532    | 7   | MDN1     |
| chr4:169585348-169590809  | 15  | NEK1     |
| chr9:137449922-137452435  | 30  | NSMF     |
| chr1:113704080-113706722  | 7   | PHTF1    |
| chr9:122892908-122897576  | 10  | RC3H2    |
| chr12:128799258-128809473 | 14  | SLC15A4  |
| chr2:213310058-213350645  | 124 | SPAG16   |
| chr6:135300499-135358187  | 7   | AHI1     |
| chr19:56413958-56414440   | 10  | ZNF583   |
| chr8:97661071-97691188    | 152 | MTDH     |
| chrX:65075605-65107023    | 9   | nogene   |
| chr19:17277326-17277763   | 13  | nogene   |
| chr16:8811637-8813106     | 29  | PMM2     |
| chr9:127034430-127052939  | 18  | RALGPS1  |
| chr5:78128029-78165672    | 46  | AP3B1    |
| chr6:44392666-44393573    | 7   | CDC5L    |
| chr4:83049165-83049984    | 7   | COPS4    |
| chr3:197081050-197136678  | 7   | DLG1     |
| chr3:172251259-172307501  | 10  | FNDC3B   |
| chr18:35654658-35692320   | 7   | GALNT1   |
| chr9:77922160-77935889    | 19  | GNAQ     |
| chrX:57091049-57096235    | 4   | nogene   |
| chrX:129116609-129169451  | 18  | nogene   |
| chr10:73016845-73047101   | 7   | P4HA1    |
| chr12:3814036-3863957     | 4   | PARP11   |
| chr7:72802399-72815481    | 4   | TYW1B    |
| chr16:16071641-16079478   | 7   | ABCC1    |
| chr7:73465438-73470483    | 25  | BAZ1B    |
| chr3:56572336-56594028    | 7   | CCDC66   |
| chr10:124816575-124831463 | 8   | FAM175B  |
| chr1:240206798-240215851  | 6   | FMN2     |
| chr9:125307412-125307880  | 9   | GAPVD1   |
| chr2:69864899-69871832    | 8   | GMCL1    |
| chr6:30289361-30296237    | 10  | HCG18    |



|                           |     |            |
|---------------------------|-----|------------|
| chr14:31116235-31121505   | 49  | HECTD1     |
| chr4:82978882-82984876    | 23  | LIN54      |
| chr19:57784189-57784640   | 7   | nogene     |
| chr2:26045523-26046043    | 7   | nogene     |
| chr17:5354358-5365238     | 7   | RABEP1     |
| chr3:101398860-101459052  | 23  | SENP7      |
| chr5:139021170-139026992  | 13  | SIL1       |
| chr8:73688653-73738349    | 5   | STAU2      |
| chr8:124515745-124522200  | 70  | TATDN1     |
| chr17:82889667-82911789   | 34  | TBCD       |
| chr1:229643532-229654388  | 11  | URB2       |
| chr1:168063620-168068463  | 50  | DCAF6      |
| chr2:174223032-174246815  | 12  | OLA1       |
| chr1:52509595-52526373    | 11  | ZCCHC11    |
| chr10:863742-890829       | 8   | LARP4B     |
| chr15:80970461-80982182   | 10  | MESDC2     |
| chr19:10913876-10916777   | 112 | CARM1      |
| chr12:38693656-38730358   | 8   | CPNE8      |
| chr17:45237280-45239065   | 32  | FMNL1      |
| chr10:74969659-74989112   | 20  | KAT6B      |
| chr21:36007318-36007834   | 11  | LINC01436  |
| chr1:113671733-113673465  | 103 | MAGI3      |
| chr10:13188880-13201534   | 8   | MCM10      |
| chr3:9445047-9445740      | 19  | SETD5      |
| chr8:17265906-17286427    | 19  | VPS37A     |
| chr17:60454301-60460787   | 12  | APPBP2     |
| chr17:60460662-60500487   | 18  | APPBP2     |
| chr8:22605735-22607325    | 15  | CCAR2      |
| chr17:59651202-59656027   | 10  | CLTC       |
| chr12:108652271-108657699 | 13  | CORO1C     |
| chr10:43154896-43176032   | 14  | CSGALNACT2 |
| chr5:13911385-13931244    | 12  | DNAH5      |
| chr1:97515725-97549744    | 93  | DPYD       |
| chr9:37780657-37784063    | 9   | EXOSC3     |
| chr1:50738862-50801677    | 8   | FAF1       |
| chr2:15402167-15427794    | 8   | NBAS       |
| chr17:1351364-1351837     | 5   | nogene     |
| chrX:57091049-57095538    | 24  | nogene     |
| chr2:151465853-151475219  | 9   | nogene     |
| chr3:23259618-23310727    | 7   | nogene     |
| chr8:51860844-51861246    | 98  | PCMTD1     |
| chr12:106363869-106380139 | 12  | POLR3B     |
| chr1:171522176-171523522  | 58  | PRRC2C     |

|                           |     |          |
|---------------------------|-----|----------|
| chr5:170924016-170924550  | 9   | RANBP17  |
| chr1:32657426-32672901    | 9   | RBBP4    |
| chr3:49972058-49999513    | 25  | RBM6     |
| chr10:78035351-78035720   | 12  | RPS24    |
| chr9:2181570-2192802      | 13  | SMARCA2  |
| chr13:24288998-24290884   | 17  | SPATA13  |
| chr17:20231757-20232405   | 10  | SPECC1   |
| chr14:35007282-35008831   | 34  | SRP54    |
| chr7:47297081-47305003    | 5   | TNS3     |
| chr4:39737419-39774933    | 36  | UBE2K    |
| chr2:61241559-61246477    | 7   | USP34    |
| chr12:64409961-64419094   | 16  | XPOT     |
| chr6:36899425-36902434    | 6   | C6orf89  |
| chr5:148394713-148410765  | 8   | FBXO38   |
| chr12:109481636-109483981 | 28  | UBE3B    |
| chr5:157509300-157513505  | 11  | ADAM19   |
| chr11:129040927-129066868 | 24  | ARHGAP32 |
| chr8:61644599-61653660    | 10  | ASPH     |
| chr7:16665436-16704669    | 7   | BZW2     |
| chr4:15502428-15502923    | 7   | CC2D2A   |
| chr3:33687059-33696933    | 11  | CLASP2   |
| chr12:12500518-12521463   | 12  | DUSP16   |
| chr6:135039572-135050647  | 25  | HBS1L    |
| chr4:74199793-74225394    | 8   | MTHFD2L  |
| chr13:29439982-29492719   | 13  | MTUS2    |
| chr20:43681783-43687072   | 6   | MYBL2    |
| chr12:78116771-78118297   | 10  | NAV3     |
| chr10:110593072-110598290 | 9   | SMC3     |
| chr18:2732264-2740821     | 10  | SMCHD1   |
| chr4:105259618-105272918  | 6   | TET2     |
| chr12:49328926-49329454   | 8   | TROAP    |
| chr1:19186539-19187540    | 18  | UBR4     |
| chr1:77736055-77741748    | 14  | USP33    |
| chrX:131389016-131399704  | 136 | nogene   |
| chr3:50059648-50062108    | 15  | RBM6     |
| chr1:19344357-19357563    | 9   | CAPZB    |
| chr7:740818-741465        | 24  | DNAAF5   |
| chr22:40552105-40552367   | 9   | MKL1     |
| chr8:47918276-47927890    | 8   | PRKDC    |
| chr9:6465743-6477808      | 10  | UHRF2    |
| chr3:44629073-44631221    | 10  | ZNF197   |
| chr14:103491776-103500200 | 11  | MARK3    |
| chr5:134697125-134703932  | 34  | SEC24A   |

|                           |     |          |
|---------------------------|-----|----------|
| chr18:21366026-21395561   | 26  | GREB1L   |
| chr3:125313307-125315053  | 12  | ZNF148   |
| chr22:19191303-19199841   | 7   | CLTCL1   |
| chr16:11904500-11905587   | 9   | nogene   |
| chr20:41512845-41533570   | 20  | CHD6     |
| chr2:36441257-36479694    | 21  | CRIM1    |
| chr7:6425987-6432959      | 67  | DAGLB    |
| chr10:68459103-68471885   | 5   | DNA2     |
| chr1:44319627-44352925    | 17  | ERI3     |
| chr5:128519272-128530693  | 5   | FBN2     |
| chr22:32487744-32495530   | 5   | FBXO7    |
| chr5:131716564-131744690  | 26  | FNIP1    |
| chr18:32269690-32270383   | 9   | GAREM    |
| chr13:30230510-30241086   | 21  | KATNAL1  |
| chr9:14120439-14179780    | 5   | NFIB     |
| chr2:130156908-130157114  | 43  | nogene   |
| chr6:17674904-17675770    | 35  | NUP153   |
| chr11:68537658-68537891   | 7   | PPP6R3   |
| chr5:65576878-65583219    | 11  | PPWD1    |
| chr1:92333390-92380873    | 660 | RPAP2    |
| chr12:100282942-100312653 | 9   | SCYL2    |
| chr3:47056820-47067118    | 85  | SETD2    |
| chr12:123390629-123396432 | 20  | SETD8    |
| chr11:107804717-107806876 | 11  | SLC35F2  |
| chr3:27397683-27403384    | 20  | SLC4A7   |
| chr2:32114637-32116212    | 29  | SPAST    |
| chr3:67518246-67609596    | 7   | SUCLG2   |
| chr22:46974289-46978934   | 43  | TBC1D22A |
| chr15:75854385-75873568   | 35  | UBE2Q2   |
| chr7:157220688-157231327  | 78  | UBE3C    |
| chr6:144781921-144803147  | 102 | UTRN     |
| chr9:14609849-14640012    | 5   | ZDHHC21  |
| chr10:31387123-31461237   | 19  | ZEB1     |
| chr13:20002849-20006586   | 25  | ZMYM2    |
| chr21:29066715-29070337   | 11  | CCT8     |
| chr22:24570590-24570913   | 10  | nogene   |
| chr1:5952699-5986327      | 18  | NPHP4    |
| chr9:114466266-114478771  | 23  | DFNB31   |
| chr10:35137781-35152380   | 8   | CREM     |
| chr17:35605704-35608387   | 24  | AP2B1    |
| chr5:177531281-177539147  | 6   | FAM193B  |
| chr11:61313498-61316567   | 13  | DDB1     |
| chr1:117460488-117466427  | 70  | MAN1A2   |

|                           |     |           |
|---------------------------|-----|-----------|
| chr6:56526360-56536940    | 9   | DST       |
| chr8:47836337-47837419    | 5   | PRKDC     |
| chr14:54774933-54776540   | 7   | SAMD4A    |
| chr16:53844154-53879987   | 12  | FTO       |
| chr22:25027944-25029540   | 8   | KIAA1671  |
| chr15:67600684-67664645   | 7   | MAP2K5    |
| chr5:43612907-43628387    | 6   | NNT       |
| chr8:128009589-128080430  | 8   | nogene    |
| chr9:131455075-131465078  | 6   | PRRC2B    |
| chr8:140830471-140921132  | 7   | PTK2      |
| chr1:41113282-41186250    | 6   | SCMH1     |
| chr1:246327200-246355094  | 28  | SMYD3     |
| chr20:61997549-61999108   | 8   | TAF4      |
| chr21:43903956-43904452   | 9   | AGPAT3    |
| chr8:61651049-61684188    | 57  | ASPH      |
| chr5:133064979-133076898  | 80  | HSPA4     |
| chr19:10489191-10489853   | 7   | KEAP1     |
| chr4:74174505-74175403    | 19  | MTHFD2L   |
| chr4:1900625-1939778      | 245 | WHSC1     |
| chr12:100097364-100098541 | 11  | UHRF1BP1L |
| chr3:132525609-132531097  | 8   | DNAJC13   |
| chr17:1875660-1880691     | 9   | RPA1      |
| chr12:56581183-56582152   | 12  | RBMS2     |
| chr8:42459895-42465917    | 38  | SLC20A2   |
| chr22:17688985-17702386   | 10  | BCL2L13   |
| chr7:102097363-102115273  | 23  | CUX1      |
| chr14:22906194-22913845   | 13  | RBM23     |
| chr2:222916318-222924595  | 17  | ACSL3     |
| chr15:43335695-43349045   | 26  | ADAL      |
| chr10:408925-423033       | 16  | DIP2C     |
| chr7:158793649-158798076  | 5   | ESYT2     |
| chr12:120142506-120142941 | 19  | GCN1      |
| chr14:73077368-73088161   | 23  | RBM25     |
| chr7:854919-857957        | 19  | SUN1      |
| chr12:49661965-49668554   | 24  | FMNL3     |
| chr16:66727687-66732505   | 6   | DYNC1LI2  |
| chr14:60796216-60818847   | 24  | MNAT1     |
| chr11:1286001-1295794     | 69  | TOLLIP    |
| chr2:9376907-9388546      | 14  | ASAP2     |
| chr3:3167633-3175269      | 7   | CRBN      |
| chr18:79096475-79176907   | 42  | ATP9B     |
| chr22:49787389-49799119   | 24  | BRD1      |
| chr5:173080584-173091401  | 15  | CREBRF    |

|                           |     |          |
|---------------------------|-----|----------|
| chr2:65344435-65344896    | 7   | SPRED2   |
| chr8:102323310-102347092  | 7   | UBR5     |
| chr19:32622421-32625966   | 38  | ANKRD27  |
| chr17:60494465-60500487   | 15  | APPBP2   |
| chr16:53254437-53255779   | 7   | CHD9     |
| chr3:33644756-33696933    | 6   | CLASP2   |
| chr5:112259228-112280323  | 13  | EPB41L4A |
| chr9:523892-540667        | 12  | KANK1    |
| chr12:122584277-122586757 | 6   | KNTC1    |
| chr3:14944650-14944903    | 7   | nogene   |
| chr2:208304170-208305013  | 5   | PIKFYVE  |
| chr16:53442657-53447106   | 14  | RBL2     |
| chr8:100268784-100275161  | 15  | RNF19A   |
| chr1:204112914-204123804  | 13  | SOX13    |
| chr17:54985613-54990957   | 27  | STXBP4   |
| chr15:65497863-65500779   | 27  | DPP8     |
| chr17:28682726-28683816   | 16  | SUPT6H   |
| chr3:183840569-183868060  | 45  | PARL     |
| chr15:43756648-43763206   | 67  | PDIA3    |
| chrX:63665885-63724711    | 26  | ARHGEF9  |
| chr16:23642954-23661281   | 28  | DCTN5    |
| chr5:31421271-31424471    | 517 | DROSHA   |
| chr3:37281957-37296219    | 4   | GOLGA4   |
| chr20:4795814-4801062     | 13  | RASSF2   |
| chr15:44648865-44652266   | 15  | SPG11    |
| chr1:83911164-83947282    | 19  | TTLL7    |
| chr10:12028744-12029524   | 5   | UPF2     |
| chr4:84860411-84932363    | 14  | WDFY3    |
| chr14:74289482-74290499   | 10  | ABCD4    |
| chr9:32429418-32431843    | 10  | ACO1     |
| chr4:61934839-62044549    | 8   | ADGRL3   |
| chr6:135358131-135411544  | 8   | AHI1     |
| chr19:40241937-40242687   | 36  | AKT2     |
| chr12:110029477-110036328 | 7   | ANKRD13A |
| chr12:45891779-45893721   | 30  | ARID2    |
| chr3:48927461-48927813    | 29  | ARIH2    |
| chr8:61567167-61619019    | 8   | ASPH     |
| chr2:175093060-175118369  | 7   | ATF2     |
| chr11:108227594-108267342 | 28  | ATM      |
| chr1:111456085-111459636  | 37  | ATP5F1   |
| chr13:31215050-31261082   | 26  | B3GLCT   |
| chr16:88004294-88038011   | 33  | BANP     |
| chr5:34023908-34035758    | 8   | C1QTNF3  |

|                           |     |           |
|---------------------------|-----|-----------|
| chr5:37238856-37243119    | 7   | C5orf42   |
| chr2:151841902-151860820  | 11  | CACNB4    |
| chr5:179708238-179709059  | 178 | CANX      |
| chr19:13920556-13923811   | 29  | CC2D1A    |
| chr6:47576523-47609304    | 11  | CD2AP     |
| chr4:184710071-184725062  | 8   | CENPU     |
| chr7:102097363-102111774  | 10  | CUX1      |
| chr10:100243697-100250332 | 14  | CWF19L1   |
| chr9:123557569-123557964  | 7   | DENND1A   |
| chr5:60638749-60647533    | 75  | DEPDC1B   |
| chr2:229447315-229477253  | 5   | DNER      |
| chr10:126970701-127127764 | 15  | DOCK1     |
| chrX:24064200-24068108    | 39  | EIF2S3    |
| chr18:45880074-45912456   | 9   | EPG5      |
| chr7:158759485-158767774  | 28  | ESYT2     |
| chr1:92605306-92636336    | 48  | EVI5      |
| chr10:15821655-15847943   | 227 | FAM188A   |
| chr4:2596083-2639859      | 36  | FAM193A   |
| chr5:171899003-171900100  | 10  | FBXW11    |
| chr4:122876320-122892296  | 16  | FGF2      |
| chr9:113198854-113203035  | 20  | FKBP15    |
| chr3:197755669-197756557  | 7   | FYTTD1    |
| chr7:50669721-50674658    | 14  | GRB10     |
| chr8:30607056-30614715    | 27  | GTF2E2    |
| chr15:83157414-83164075   | 8   | HDGFRP3   |
| chr14:31380466-31387375   | 20  | HEATR5A   |
| chr8:28980070-29018913    | 10  | HMBOX1    |
| chr20:43613849-43624045   | 42  | IFT52     |
| chr7:111487237-111561923  | 117 | IMMP2L    |
| chr1:61990167-62038049    | 12  | INADL     |
| chr13:51421111-51430383   | 12  | INTS6     |
| chr8:94828974-94841591    | 11  | INTS8     |
| chr16:47311239-47313823   | 59  | ITFG1     |
| chr2:24293687-24295804    | 26  | ITSN2     |
| chr19:10491576-10492262   | 67  | KEAP1     |
| chr1:32030297-32033334    | 310 | KHDRBS1   |
| chr15:64365973-64376905   | 8   | KIAA0101  |
| chr18:37066889-37067545   | 33  | KIAA1328  |
| chr6:57052685-57059377    | 8   | KIAA1586  |
| chr12:122587710-122588816 | 6   | KNTC1     |
| chr14:50283870-50303017   | 14  | L2HGDH    |
| chr13:27581296-27581803   | 36  | LNX2      |
| chr16:74360632-74360891   | 21  | LOC283922 |

|                          |     |          |
|--------------------------|-----|----------|
| chr1:53255116-53258471   | 5   | LRP8     |
| chr11:65605760-65608448  | 14  | MAP3K11  |
| chr6:167870385-167889326 | 9   | MLLT4    |
| chr14:64412471-64418024  | 7   | MTHFD1   |
| chr3:9669431-9671170     | 15  | MTMR14   |
| chr22:36341369-36349255  | 125 | MYH9     |
| chr11:34108210-34127599  | 9   | NAT10    |
| chr17:16034764-16048988  | 12  | NCOR1    |
| chr19:52588531-52599170  | 10  | nogene   |
| chr18:57731413-57735592  | 29  | nogene   |
| chr8:123452562-123453459 | 14  | nogene   |
| chr3:48749712-48750170   | 9   | nogene   |
| chr17:45054541-45055894  | 10  | nogene   |
| chr12:5160306-5198646    | 18  | nogene   |
| chr14:26729558-26731156  | 6   | nogene   |
| chr7:66882892-66890411   | 6   | nogene   |
| chr9:104750954-104759440 | 12  | nogene   |
| chr9:99844648-99847615   | 9   | NR4A3    |
| chr1:51800555-51814089   | 6   | NRD1     |
| chr10:18596207-18616293  | 12  | NSUN6    |
| chr3:31733256-31748120   | 7   | OSBPL10  |
| chr17:78414878-78424192  | 7   | PGS1     |
| chr3:170122590-170126007 | 25  | PHC3     |
| chr6:43587271-43601091   | 39  | POLH     |
| chr1:212342187-212349242 | 18  | PPP2R5A  |
| chr11:68515027-68537891  | 10  | PPP6R3   |
| chr1:156791696-156797341 | 9   | PRCC     |
| chr8:127890588-127939676 | 16  | PVT1     |
| chr7:39686630-39696859   | 42  | RALA     |
| chr3:50099981-50105142   | 14  | RBM5     |
| chr21:34521498-34523710  | 7   | RCAN1    |
| chr18:13731475-13731934  | 14  | RNMT     |
| chr1:92834778-92837633   | 33  | RPL5     |
| chr1:92833388-92837633   | 9   | RPL5     |
| chr3:158122102-158203245 | 8   | RSRC1    |
| chr1:109230877-109231786 | 75  | SARS     |
| chr7:72830750-72831798   | 14  | SBDSP1   |
| chr7:4049347-4051830     | 11  | SDK1     |
| chr14:99458278-99463578  | 9   | SETD3    |
| chrX:119406459-119426354 | 46  | SLC25A43 |
| chr11:93148652-93166016  | 5   | SLC36A4  |
| chr12:46197719-46198743  | 25  | SLC38A1  |
| chr3:27379248-27424152   | 6   | SLC4A7   |

|                           |     |          |
|---------------------------|-----|----------|
| chr10:100915998-100926019 | 9   | SLF2     |
| chrX:53394777-53396617    | 8   | SMC1A    |
| chr16:29553085-29554992   | 15  | SMG1P2   |
| chr6:85557975-85567577    | 33  | SNX14    |
| chr18:26032398-26078160   | 12  | SS18     |
| chr6:36515337-36540207    | 8   | STK38    |
| chr11:59790518-59795482   | 6   | STX3     |
| chr13:47988540-47997023   | 7   | SUCLA2   |
| chr18:26265169-26282060   | 7   | TAF4B    |
| chr3:100295086-100298045  | 13  | TBC1D23  |
| chr14:39151745-39159550   | 16  | TRAPPC6B |
| chr14:90730074-90744922   | 5   | TTC7B    |
| chr2:178535731-178571449  | 7   | TTN-AS1  |
| chr6:3155624-3177642      | 119 | TUBB2A   |
| chr15:43400043-43401850   | 31  | TUBGCP4  |
| chr6:158448995-158461729  | 114 | TULP4    |
| chr1:162566011-162600903  | 15  | UAP1     |
| chr1:154227281-154237136  | 8   | UBAP2L   |
| chr8:17280374-17286427    | 18  | VPS37A   |
| chr5:37697654-37703087    | 19  | WDR70    |
| chr4:1892165-1901251      | 8   | WHSC1    |
| chr4:1900625-1930770      | 149 | WHSC1    |
| chr21:39390697-39393280   | 8   | WRB      |
| chr1:180787752-180811488  | 19  | XPR1     |
| chr2:216113015-216162048  | 8   | XRCC5    |
| chr3:142425221-142426841  | 56  | XRN1     |
| chr7:130026157-130039547  | 13  | ZC3HC1   |
| chr14:73931502-73932112   | 46  | ZNF410   |
| chr19:32382466-32386721   | 6   | ZNF507   |
| chr17:15978043-15987368   | 13  | ZSWIM7   |
| chr20:33366858-33372697   | 12  | CDK5RAP1 |
| chr14:21412912-21415907   | 6   | CHD8     |
| chr12:38829378-38874511   | 34  | CPNE8    |
| chr2:232130618-232163632  | 12  | DIS3L2   |
| chr15:89299799-89303915   | 16  | FANCI    |
| chr16:53844154-53845086   | 8   | FTO      |
| chr16:48296014-48303305   | 19  | LONP2    |
| chr9:110972072-111005539  | 12  | LPAR1    |
| chr12:68820324-68824651   | 121 | MDM2     |
| chr12:65306862-65308655   | 19  | MSRB3    |
| chr7:10990702-11028818    | 13  | PHF14    |
| chr6:35410213-35411217    | 7   | PPARD    |
| chr12:27633361-27635115   | 46  | PPFIBP1  |



|                           |     |              |
|---------------------------|-----|--------------|
| chr20:2964271-2975241     | 13  | PTPRA        |
| chr6:130385172-130387592  | 25  | TMEM200A     |
| chr9:109057190-109108570  | 6   | TMEM245      |
| chr15:50637421-50648885   | 8   | TRPM7        |
| chr19:37165594-37170054   | 11  | ZNF585A      |
| chr7:64535818-64544432    | 19  | ZNF680       |
| chr18:21656860-21659343   | 5   | ABHD3        |
| chr19:48230437-48241063   | 24  | CARD8        |
| chr11:9152357-9170777     | 8   | DENND5A      |
| chr1:1804418-1839238      | 158 | GNB1         |
| chr7:1898199-2069338      | 25  | MAD1L1       |
| chr17:47603914-47613725   | 10  | NPEPPS       |
| chr7:6002452-6006031      | 18  | PMS2         |
| chr2:28776850-28783978    | 8   | PPP1CB       |
| chr3:19970547-19978403    | 19  | RAB5A        |
| chr19:5645336-5649975     | 7   | SAFB         |
| chr15:76841733-76862533   | 47  | SCAPER       |
| chr10:86467278-86473973   | 63  | WAPL         |
| chr22:40914238-40924482   | 5   | XPNPEP3      |
| chr22:21769194-21807846   | 7   | MAPK1        |
| chr9:94789894-94801002    | 25  | C9orf3       |
| chr13:60093627-60112186   | 26  | DIAPH3       |
| chrX:64328771-64337393    | 56  | MTMR8        |
| chr11:29037741-29044660   | 15  | nogene       |
| chr15:67830190-67833257   | 13  | SKOR1        |
| chr4:148063147-148072179  | 7   | ARHGAP10     |
| chr2:25799384-25845563    | 37  | ASXL2        |
| chr22:25457258-25459515   | 38  | CRYBB2P1     |
| chr4:82358658-82359639    | 5   | HNRNPD       |
| chr1:150440922-150446401  | 30  | RPRD2        |
| chr1:186398312-186406268  | 12  | C1orf27      |
| chr7:66553988-66554837    | 8   | GS1-124K5.11 |
| chr9:35707920-35708340    | 16  | TLN1         |
| chr12:104288930-104315896 | 17  | TXNRD1       |
| chr19:12110304-12111372   | 13  | ZNF788       |
| chr2:235968461-235968957  | 16  | AGAP1        |
| chr7:65726770-65727108    | 18  | LOC441242    |
| chr1:28702437-28704329    | 18  | GMEB1        |
| chr1:155370503-155370983  | 84  | ASH1L        |
| chr9:96719508-96721517    | 10  | nogene       |
| chr10:263203-263658       | 35  | nogene       |
| chr3:104817472-104842744  | 8   | nogene       |
| chr3:16271658-16272321    | 8   | OXNAD1       |

|                           |     |          |
|---------------------------|-----|----------|
| chr2:65344718-65432084    | 14  | SPRED2   |
| chr8:98746709-98749390    | 10  | STK3     |
| chr10:327005-349454       | 28  | DIP2C    |
| chr11:66748378-66759096   | 24  | C11orf80 |
| chr19:1270927-1274440     | 13  | CIRBP    |
| chr3:50106766-50108304    | 21  | RBM5     |
| chr12:96313320-96334865   | 8   | CDK17    |
| chr1:22863036-22865212    | 12  | EPHB2    |
| chr5:142873399-142879445  | 7   | ARHGAP26 |
| chr11:33105566-33106064   | 71  | CSTF3    |
| chr17:61919399-61926662   | 7   | INTS2    |
| chr10:93366391-93373085   | 7   | MYOF     |
| chr2:40428474-40430301    | 7   | nogene   |
| chr13:24455016-24493733   | 12  | PARP4    |
| chrX:15425905-15459740    | 28  | PIR      |
| chr10:7367648-7370375     | 27  | SFMBT2   |
| chr5:132927120-132934941  | 45  | AFF4     |
| chr15:85662387-85682212   | 8   | AKAP13   |
| chr17:1072613-1100735     | 10  | ABR      |
| chr11:108133819-108135242 | 17  | ACAT1    |
| chr20:25021388-25023641   | 9   | ACSS1    |
| chr2:113939958-113942359  | 87  | ACTR3    |
| chr12:19500096-19514784   | 7   | AEBP2    |
| chr2:235744697-235807331  | 9   | AGAP1    |
| chr2:177440964-177462018  | 130 | AGPS     |
| chr9:85575314-85579096    | 32  | AGTPBP1  |
| chr17:19939712-19958571   | 12  | AKAP10   |
| chr4:145081659-145096111  | 6   | ANAPC10  |
| chr9:137175501-137175707  | 17  | ANAPC2   |
| chr9:97994630-98012472    | 9   | ANP32B   |
| chr15:50948019-50958794   | 42  | AP4E1    |
| chr21:25975069-26000182   | 71  | APP      |
| chr17:60464020-60494617   | 7   | APPBP2   |
| chr22:42810812-42817857   | 5   | ARFGAP3  |
| chr11:46688172-46696156   | 8   | ARHGAP1  |
| chr14:32146262-32152528   | 9   | ARHGAP5  |
| chr1:155352705-155354630  | 12  | ASH1L    |
| chrX:139814877-139826823  | 150 | ATP11C   |
| chr22:17612811-17619526   | 8   | ATP6V1E1 |
| chr20:56381432-56384324   | 359 | AURKA    |
| chr13:102807145-102834552 | 25  | BIVM     |
| chr15:59671182-59672739   | 10  | BNIP2    |
| chr21:39274373-39277351   | 11  | BRWD1    |

|                           |     |           |
|---------------------------|-----|-----------|
| chr11:76451857-76472840   | 41  | C11orf30  |
| chr19:16500791-16501551   | 8   | C19orf44  |
| chr1:154212319-154214574  | 14  | C1orf43   |
| chr1:64676894-64679756    | 11  | CACHD1    |
| chr12:28198942-28307749   | 11  | CCDC91    |
| chr10:12230947-12238485   | 105 | CDC123    |
| chr1:227119803-227129231  | 8   | CDC42BPA  |
| chr7:39987598-40047877    | 14  | CDK13     |
| chr3:113427186-113433669  | 5   | CFAP44    |
| chr12:70278131-70294294   | 8   | CNOT2     |
| chr7:135410523-135422353  | 11  | CNOT4     |
| chr12:108657303-108662158 | 24  | CORO1C    |
| chr17:30384988-30390159   | 6   | CPD       |
| chr16:3791980-3810779     | 12  | CREBBP    |
| chr2:36358903-36464655    | 5   | CRIM1     |
| chr8:67115913-67118821    | 7   | CSPP1     |
| chr16:67610823-67616878   | 11  | CTCF      |
| chr15:44458990-44459200   | 20  | CTDSPL2   |
| chr10:100245798-100246935 | 7   | CWF19L1   |
| chrX:19965043-19970298    | 11  | CXorf23   |
| chr15:22925981-22932340   | 10  | CYFIP1    |
| chr7:6421726-6424835      | 10  | DAGLB     |
| chr6:117540667-117543211  | 9   | DCBLD1    |
| chr11:679687-681089       | 72  | DEAF1     |
| chr12:31426292-31447769   | 18  | DENND5B   |
| chr5:60686961-60687838    | 29  | DEPDC1B   |
| chrX:2266739-2425304      | 12  | DHRX      |
| chr12:124966792-124967218 | 6   | DHX37     |
| chr13:59774188-59810923   | 27  | DIAPH3    |
| chr1:231795241-231818517  | 11  | DISC1     |
| chr11:112033403-112051349 | 5   | DLAT      |
| chr9:33036573-33037115    | 30  | DNAJA1    |
| chr3:51146548-51160702    | 14  | DOCK3     |
| chr7:35117747-35132369    | 13  | DPY19L2P1 |
| chr2:26924886-26928323    | 26  | DPYSL5    |
| chr3:32541036-32545965    | 63  | DYNC1LI1  |
| chr20:35123889-35126375   | 19  | EDEM2     |
| chr14:89931540-89954001   | 8   | EFCAB11   |
| chr14:33925617-33931215   | 39  | EGLN3     |
| chr19:47718508-47726224   | 45  | EHD2      |
| chr20:34093674-34103565   | 5   | EIF2S2    |
| chr1:20980333-21089213    | 11  | EIF4G3    |
| chr14:88712270-88715195   | 10  | EML5      |

|                           |     |             |
|---------------------------|-----|-------------|
| chr22:41135812-41137790   | 11  | EP300       |
| chr4:65601640-65602304    | 7   | EPHA5       |
| chr1:51363865-51366029    | 15  | EPS15       |
| chr12:1189858-1290012     | 30  | ERC1        |
| chr9:95897848-95956013    | 30  | ERCC6L2     |
| chr10:49524032-49524777   | 12  | ERCC6-PGBD3 |
| chr10:100164003-100179247 | 6   | ERLIN1      |
| chr1:50705785-50744775    | 12  | FAF1        |
| chr4:38931450-38932374    | 6   | FAM114A1    |
| chr9:93471140-93501120    | 6   | FAM120A     |
| chr9:93471262-93498886    | 5   | FAM120A     |
| chr9:93561108-93562304    | 8   | FAM120A     |
| chrX:134781820-134789266  | 6   | FAM122B     |
| chr5:137941943-137943216  | 19  | FAM13B      |
| chr5:138018301-138021197  | 27  | FAM13B      |
| chr18:13671861-13682105   | 15  | FAM210A     |
| chr15:52584744-52593736   | 36  | FAM214A     |
| chr15:30908117-30914091   | 24  | FAN1        |
| chr5:108768092-108798389  | 102 | FER         |
| chr6:167022408-167026615  | 13  | FGFR1OP     |
| chr14:75633628-75641898   | 8   | FLVCR2      |
| chr13:40559508-40560860   | 9   | FOXO1       |
| chr16:53873785-53879987   | 29  | FTO         |
| chr2:75694240-75696315    | 4   | GCFC2       |
| chr2:190895151-190910321  | 23  | GLS         |
| chr3:168036835-168041474  | 26  | GOLIM4      |
| chr2:156476097-156513496  | 10  | GPD2        |
| chr2:9961045-9965381      | 7   | GRHL1       |
| chr13:45151686-45207505   | 63  | GTF2F2      |
| chr7:74589850-74591017    | 11  | GTF2IRD1    |
| chr2:37000585-37002572    | 9   | HEATR5B     |
| chr10:67992198-68025676   | 7   | HERC4       |
| chr2:190287585-190310796  | 14  | HIBCH       |
| chr14:61720381-61727655   | 25  | HIF1A       |
| chr15:77477554-77479321   | 9   | HMG20A      |
| chr10:68341173-68341851   | 13  | HNRNPH3     |
| chr8:42973288-42986795    | 65  | HOOK3       |
| chr2:238182064-238185287  | 408 | ILKAP       |
| chr11:77955941-77991299   | 10  | INTS4       |
| chr8:94827262-94827793    | 17  | INTS8       |
| chr8:28835291-28837776    | 8   | INTS9       |
| chr10:63380317-63455089   | 103 | JMJD1C      |
| chr1:35478965-35479212    | 52  | KIAA0319L   |

|                           |     |              |
|---------------------------|-----|--------------|
| chr5:62363177-62366481    | 6   | KIF2A        |
| chr16:87755193-87762040   | 8   | KLHDC4       |
| chr4:165219933-165228913  | 40  | KLHL2        |
| chr3:122442037-122452064  | 11  | KPNA1        |
| chr3:122457725-122467429  | 15  | KPNA1        |
| chr8:70637814-70644243    | 38  | LACTB2       |
| chr8:97805352-97825153    | 331 | LAPTM4B      |
| chr2:30562145-30568176    | 29  | LCLAT1       |
| chr5:126804775-126826107  | 52  | LMNB1        |
| chr17:5209749-5223484     | 5   | LOC100130950 |
| chr7:102397619-102404683  | 11  | LOC100630923 |
| chr3:197866111-197871462  | 57  | LRCH3        |
| chr11:68347846-68390052   | 20  | LRP5         |
| chr1:3780637-3785203      | 6   | LRRC47       |
| chr1:219193129-219241308  | 14  | LYPLAL1      |
| chr12:8943404-8943910     | 11  | M6PR         |
| chr3:65429519-65442849    | 9   | MAGI1        |
| chr1:113580541-113594560  | 12  | MAGI3        |
| chr11:95985530-95991723   | 32  | MAML2        |
| chr4:102714437-102726683  | 167 | MANBA        |
| chr15:67550033-67600749   | 25  | MAP2K5       |
| chr15:67664596-67703408   | 77  | MAP2K5       |
| chr2:159714556-159729175  | 7   | 7-Mar        |
| chr2:85541632-85543034    | 20  | MAT2A        |
| chr5:113082859-113085310  | 15  | MCC          |
| chr1:84947032-84965708    | 32  | MCOLN2       |
| chr6:89722954-89725396    | 54  | MDN1         |
| chr18:50918109-50924212   | 10  | ME2          |
| chr12:82386802-82403130   | 15  | METTTL25     |
| chr4:127930682-127938838  | 13  | MFSD8        |
| chr9:21476898-21481152    | 23  | MIR31HG      |
| chr18:36266748-36269675   | 5   | MOCOS        |
| chr18:36195256-36260175   | 10  | MOCOS        |
| chr12:62580296-62588156   | 7   | MON2         |
| chr21:25597301-25603935   | 19  | MRPL39       |
| chr1:37835078-37838756    | 14  | MTF1         |
| chr12:109590770-109595181 | 8   | MVK          |
| chr18:3253232-3254050     | 12  | MYL12A       |
| chr15:52416144-52433285   | 8   | MYO5A        |
| chr19:17156908-17159484   | 8   | MYO9B        |
| chr9:85959792-85996577    | 51  | NAA35        |
| chr11:71490844-71491903   | 10  | NADSYN1      |
| chr20:36665045-36671397   | 35  | NDRG3        |

|                          |     |         |
|--------------------------|-----|---------|
| chr16:47122656-47134410  | 11  | NETO2   |
| chr20:25517752-25526598  | 13  | NINL    |
| chr17:28163542-28172618  | 110 | NLK     |
| chr10:15128194-15130312  | 19  | NMT2    |
| chr1:120419849-120427847 | 104 | nogene  |
| chr1:44834464-44836058   | 5   | nogene  |
| chr17:38505285-38505652  | 15  | nogene  |
| chr6:117662905-117664862 | 8   | nogene  |
| chr19:16078608-16101409  | 12  | nogene  |
| chr17:78004169-78009697  | 23  | nogene  |
| chr11:47800144-47800523  | 8   | nogene  |
| chr3:67237400-67241819   | 15  | nogene  |
| chr3:153164765-153178789 | 16  | nogene  |
| chr3:67218045-67218290   | 13  | nogene  |
| chr12:21233699-21234299  | 12  | nogene  |
| chr5:179538993-179540832 | 19  | nogene  |
| chr16:3640714-3643036    | 15  | nogene  |
| chr9:97188464-97200565   | 7   | nogene  |
| chr2:177214730-177215110 | 10  | nogene  |
| chr16:70226769-70246610  | 32  | nogene  |
| chr1:5961793-5969259     | 28  | NPHP4   |
| chr5:143399655-143400852 | 544 | NR3C1   |
| chr5:177135086-177192019 | 31  | NSD1    |
| chr6:17661652-17665385   | 15  | NUP153  |
| chr17:5388801-5404246    | 9   | NUP88   |
| chr11:3768580-3773739    | 11  | NUP98   |
| chrX:68096869-68206673   | 9   | OPHN1   |
| chr7:104161071-104188381 | 15  | ORC5    |
| chr7:24815058-24834736   | 18  | OSBPL3  |
| chr8:100709132-100717888 | 7   | PABPC1  |
| chr8:100704296-100705673 | 128 | PABPC1  |
| chr16:23621361-23623130  | 105 | PALB2   |
| chr13:28256291-28266876  | 6   | PAN3    |
| chr10:49841949-49869555  | 69  | PARG    |
| chr14:71073544-71089342  | 6   | PCNX    |
| chr14:71073544-71076419  | 7   | PCNX    |
| chr1:233208517-233252788 | 13  | PCNXL2  |
| chr11:34931403-34984728  | 28  | PDHX    |
| chr11:34957383-34978182  | 134 | PDHX    |
| chr2:216065311-216066518 | 10  | PECR    |
| chr1:10411417-10413251   | 36  | PGD     |
| chr6:143765260-143807133 | 6   | PHACTR2 |
| chr3:170122590-170129552 | 17  | PHC3    |

|                           |     |         |
|---------------------------|-----|---------|
| chr7:11028680-11062085    | 16  | PHF14   |
| chr20:35858301-35871829   | 150 | PHF20   |
| chr16:71690518-71702731   | 7   | PHLPP2  |
| chr1:151224247-151242567  | 10  | PIP5K1A |
| chr22:27853524-27860241   | 5   | PITPNB  |
| chr8:42355515-42362698    | 13  | POLB    |
| chr6:43587271-43610723    | 14  | POLH    |
| chr1:145974824-145975436  | 9   | POLR3GL |
| chr11:68505144-68548204   | 6   | PPP6R3  |
| chr8:47794289-47807326    | 9   | PRKDC   |
| chr1:171568246-171575128  | 121 | PRRC2C  |
| chr2:86121478-86137140    | 6   | PTCD3   |
| chr8:96306443-96331095    | 318 | PTDSS1  |
| chr8:140864311-140921132  | 9   | PTK2    |
| chr3:19975600-19976169    | 21  | RAB5A   |
| chr7:66775226-66783841    | 55  | RABGEF1 |
| chr9:107300140-107306647  | 144 | RAD23B  |
| chr5:131521389-131562047  | 10  | RAPGEF6 |
| chr8:52683548-52686967    | 39  | RB1CC1  |
| chr5:150696790-150698631  | 7   | RBM22   |
| chr1:173946475-173947582  | 14  | RC3H1   |
| chr1:176144004-176163891  | 9   | RFWD2   |
| chr1:176081151-176116681  | 14  | RFWD2   |
| chr19:11397243-11397597   | 17  | RGL3    |
| chr2:3545700-3550472      | 5   | RNASEH1 |
| chr15:59052304-59058550   | 15  | RNF111  |
| chr3:196486532-196487578  | 8   | RNF168  |
| chr8:100259106-100264785  | 26  | RNF19A  |
| chr12:121402741-121417911 | 26  | RNF34   |
| chr17:1842802-1883944     | 12  | RPA1    |
| chr2:10126874-10127220    | 6   | RRM2    |
| chr16:11846500-11850418   | 23  | RSL1D1  |
| chr5:179591624-179593645  | 45  | RUFY1   |
| chr11:61437624-61446231   | 16  | SDHAF2  |
| chr12:48096342-48101516   | 31  | SENP1   |
| chr1:67420008-67425223    | 48  | SERBP1  |
| chr14:99458278-99466055   | 7   | SETD3   |
| chr19:4177078-4179286     | 9   | SIRT6   |
| chr7:100856867-100857176  | 70  | SLC12A9 |
| chr8:42439449-42444762    | 7   | SLC20A2 |
| chr19:10631056-10632156   | 11  | SLC44A2 |
| chr18:47841850-47896809   | 7   | SMAD2   |
| chrX:53403565-53403893    | 92  | SMC1A   |

|                          |     |                 |
|--------------------------|-----|-----------------|
| chr17:1786809-1787604    | 16  | SMYD4           |
| chr11:62853551-62855466  | 7   | SNHG1           |
| chr1:31267870-31292006   | 38  | SNRNP40         |
| chr15:64118116-64118854  | 74  | SNX1            |
| chr14:34586229-34609742  | 106 | SNX6            |
| chr17:51020158-51041651  | 9   | SPAG9           |
| chr22:24365475-24369320  | 20  | SPECC1L-ADORA2A |
| chr1:112600793-112616895 | 6   | ST7L            |
| chr3:136472412-136477412 | 11  | STAG1           |
| chr12:56348528-56349636  | 36  | STAT2           |
| chr17:42322281-42323625  | 12  | STAT3           |
| chr20:49135832-49174269  | 23  | STAU1           |
| chr20:49165996-49174269  | 7   | STAU1           |
| chr1:172555868-172570730 | 23  | SUCO            |
| chr3:11809516-11829864   | 24  | TAMM41          |
| chr2:159169249-159172272 | 8   | TANC1           |
| chr17:29475669-29482288  | 20  | TAOK1           |
| chr1:246544520-246557534 | 11  | TFB2M           |
| chr3:129860939-129880559 | 12  | TMCC1           |
| chr9:109050282-109108570 | 14  | TMEM245         |
| chr9:109050282-109073438 | 33  | TMEM245         |
| chr14:56585000-56636598  | 19  | TMEM260         |
| chr11:1288623-1295794    | 9   | TOLLIP          |
| chr1:223810430-223818337 | 15  | TP53BP2         |
| chr21:44052279-44055893  | 8   | TRAPPC10        |
| chr5:115130591-115134147 | 13  | TRIM36          |
| chr18:24064139-24130417  | 8   | TTC39C          |
| chr15:23030884-23037152  | 8   | TUBGCP5         |
| chr17:18789352-18804266  | 6   | TVP23B          |
| chr1:154251040-154257434 | 11  | UBAP2L          |
| chr15:25354352-25360527  | 25  | UBE3A           |
| chr6:42603587-42615178   | 6   | UBR2            |
| chr9:111929499-111931357 | 16  | UGCG            |
| chr9:111914604-111929678 | 9   | UGCG            |
| chr2:61325374-61350693   | 9   | USP34           |
| chr10:75219062-75222402  | 12  | VDAC2           |
| chr9:77337254-77371149   | 7   | VPS13A          |
| chr15:78289618-78295725  | 12  | WDR61           |
| chr18:56717963-56731597  | 15  | WDR7            |
| chr15:43836160-43839728  | 6   | WDR76           |
| chr2:159271701-159283093 | 7   | WDSUB1          |
| chr3:183747671-183758965 | 4   | YEATS2          |
| chr10:27119293-27121448  | 10  | YME1L1          |



|                           |     |          |
|---------------------------|-----|----------|
| chr1:32592930-32593754    | 47  | ZBTB8A   |
| chr18:62539680-62550460   | 465 | ZCCHC2   |
| chr11:57692610-57696873   | 18  | ZDHHC5   |
| chr16:89733301-89734038   | 5   | ZNF276   |
| chr12:132933034-132948270 | 18  | ZNF605   |
| chr9:113969116-114016784  | 25  | ZNF618   |
| chr1:52885832-52892975    | 16  | ZYG11A   |
| chr2:177513818-177523805  | 8   | AGPS     |
| chr1:246618257-246634587  | 18  | CNST     |
| chr15:90638445-90641199   | 19  | CRTC3    |
| chr13:49997073-50044768   | 10  | DLEU2    |
| chr1:1839189-1879902      | 10  | GNB1     |
| chr14:66709356-66776521   | 10  | GPHN     |
| chr6:110960413-110962505  | 10  | GTF3C6   |
| chr9:111425417-111433372  | 8   | KIAA0368 |
| chr15:59256283-59272449   | 7   | MYO1E    |
| chr6:75835900-75841378    | 57  | MYO6     |
| chr5:150532944-150535885  | 30  | NDST1    |
| chr9:96913237-96913633    | 14  | nogene   |
| chr16:89393613-89394390   | 19  | nogene   |
| chr5:10213490-10227663    | 8   | nogene   |
| chr20:3907925-3917050     | 6   | PANK2    |
| chr8:103961064-104014615  | 6   | RIMS2    |
| chr8:47279861-47440542    | 15  | SPIDR    |
| chr5:14270824-14330900    | 9   | TRIO     |
| chr10:112527086-112538330 | 54  | VTI1A    |
| chr2:216113015-216117794  | 27  | XRCC5    |
| chr7:66127703-66145500    | 74  | CRCP     |
| chr15:65551675-65558731   | 38  | HACD3    |
| chr12:124419956-124430787 | 141 | NCOR2    |
| chr5:143295459-143314168  | 54  | NR3C1    |
| chr3:160420739-160428942  | 10  | SMC4     |
| chr14:102193462-102197847 | 20  | WDR20    |
| chr2:65246523-65255694    | 17  | ACTR2    |
| chrX:147928321-147945616  | 8   | FMR1     |
| chr8:39021642-39023325    | 31  | ADAM9    |
| chr8:61661805-61684188    | 28  | ASPH     |
| chr12:1497699-1502581     | 10  | nogene   |
| chr12:121894738-121903107 | 31  | PSMD9    |
| chr2:127993186-127996491  | 74  | SAP130   |
| chr3:100279648-100281847  | 10  | TBC1D23  |
| chr20:63789820-63790790   | 147 | ZBTB46   |
| chr19:47264602-47264946   | 137 | CCDC9    |

|                           |     |         |
|---------------------------|-----|---------|
| chr18:49118743-49163787   | 6   | DYM     |
| chr14:104157754-104167048 | 7   | KIF26A  |
| chr3:156852767-156888397  | 9   | LEKR1   |
| chr19:5711420-5712002     | 7   | LONP1   |
| chr1:243293090-243378863  | 9   | SDCCAG8 |
| chrX:118441367-118443687  | 17  | WDR44   |
| chr16:30362278-30362777   | 6   | nogene  |
| chr4:128888678-128946152  | 9   | SCLT1   |
| chr2:215336034-215349249  | 6   | ATIC    |
| chr7:39987598-40063100    | 12  | CDK13   |
| chr16:58585337-58587413   | 7   | CNOT1   |
| chr16:23416966-23418827   | 8   | COG7    |
| chr2:62943801-62949162    | 12  | EHBP1   |
| chr17:44084554-44087696   | 6   | HDAC5   |
| chr12:50435487-50437838   | 6   | LARP4   |
| chr2:15178987-15218968    | 15  | NBAS    |
| chr4:169477123-169479534  | 11  | NEK1    |
| chr6:41933549-41933881    | 18  | nogene  |
| chr10:68296265-68306906   | 8   | PBLD    |
| chr6:42966043-42966447    | 9   | PEX6    |
| chr13:29530537-29532982   | 25  | SLC7A1  |
| chr15:44592330-44596943   | 61  | SPG11   |
| chr2:202892616-202897415  | 6   | WDR12   |
| chr2:233434379-233436441  | 30  | DGKD    |
| chr1:184734530-184749592  | 12  | EDEM3   |
| chr18:688573-691276       | 8   | ENOSF1  |
| chr22:41158411-41162779   | 14  | EP300   |
| chr2:69354488-69363670    | 13  | GFPT1   |
| chr1:39439273-39439500    | 12  | MACF1   |
| chr2:39331916-39378123    | 10  | MAP4K3  |
| chr7:66771882-66799414    | 51  | RABGEF1 |
| chr6:88769773-88844521    | 36  | RNGTT   |
| chr2:210015972-210017559  | 7   | RPE     |
| chr1:243316754-243344331  | 10  | SDCCAG8 |
| chr1:168231513-168231919  | 8   | SFT2D2  |
| chr16:66513730-66549009   | 10  | TK2     |
| chr5:72888077-72889957    | 8   | TNPO1   |
| chr10:68142939-68175461   | 48  | MYPN    |
| chr6:141772872-141798155  | 10  | nogene  |
| chr11:238997-244761       | 21  | PSMD13  |
| chr6:3737078-3739161      | 153 | PXDC1   |
| chr7:72831601-72831798    | 14  | SBDSP1  |
| chr10:110589604-110593223 | 16  | SMC3    |

|                          |     |           |
|--------------------------|-----|-----------|
| chr14:30947089-30956242  | 48  | STRN3     |
| chr17:78004169-78031842  | 62  | TNRC6C    |
| chr18:47889020-47896809  | 9   | SMAD2     |
| chr19:32408216-32411372  | 36  | DPY19L3   |
| chr15:57091788-57095163  | 121 | TCF12     |
| chr4:67745826-67790511   | 7   | nogene    |
| chr5:140189063-140194652 | 62  | CYSTM1    |
| chr7:44674410-44681848   | 24  | OGDH      |
| chr11:62605112-62607099  | 5   | EML3      |
| chr1:98393054-98395390   | 10  | nogene    |
| chr3:183862696-183868060 | 10  | PARL      |
| chr19:40237968-40240110  | 38  | AKT2      |
| chr3:195708133-195708841 | 7   | LINC00969 |
| chr3:29696097-29762989   | 7   | RBMS3     |
| chr19:11397243-11400297  | 7   | RGL3      |
| chr4:84713158-84721572   | 8   | WDFY3     |
| chr7:99338180-99348959   | 8   | ARPC1A    |
| chr2:214780559-214781509 | 9   | BARD1     |
| chr1:168043024-168045227 | 16  | DCAF6     |
| chr15:74655732-74656068  | 71  | EDC3      |
| chr8:17950614-17953186   | 9   | PCM1      |
| chr12:64080285-64097375  | 6   | SRGAP1    |
| chrX:96937232-96945591   | 10  | DIAPH2    |
| chr16:879569-954666      | 7   | LMF1      |
| chr13:49451552-49461162  | 13  | SETDB2    |
| chr2:229836847-229860531 | 8   | TRIP12    |
| chr15:50471632-50477499  | 28  | USP8      |
| chr5:126554286-126556015 | 7   | ALDH7A1   |
| chr1:32224033-32226530   | 26  | EIF3I     |
| chr6:45422592-45492114   | 7   | RUNX2     |
| chr3:52912537-52916214   | 100 | SFMBT1    |
| chr15:42966152-42970607  | 7   | UBR1      |
| chr8:130124012-130128090 | 5   | ASAP1     |
| chr11:35204511-35208206  | 7   | CD44      |
| chr4:55475962-55489465   | 20  | CLOCK     |
| chr5:10381799-10391731   | 10  | 6-Mar     |
| chr12:78127166-78159286  | 12  | NAV3      |
| chr8:140710652-140711019 | 10  | nogene    |
| chr1:109281288-109281618 | 8   | PSRC1     |
| chr17:80922723-80923673  | 57  | RPTOR     |
| chr4:42018110-42049479   | 34  | SLC30A9   |
| chr2:219473503-219473903 | 7   | SPEG      |
| chr15:43135511-43160794  | 59  | TMEM62    |

|                          |     |           |
|--------------------------|-----|-----------|
| chr16:3675323-3689137    | 16  | TRAP1     |
| chr14:51022834-51025360  | 8   | TRIM9     |
| chr6:34821652-34836348   | 5   | UHRF1BP1  |
| chr17:51041500-51056482  | 241 | SPAG9     |
| chr7:105160506-105203785 | 21  | SRPK2     |
| chr22:23683724-23686995  | 16  | GUSBP11   |
| chr1:168183901-168198981 | 9   | TIPRL     |
| chr9:13205035-13250372   | 8   | MPDZ      |
| chr3:161248034-161248237 | 8   | nogene    |
| chr21:39206107-39212707  | 96  | BRWD1     |
| chr15:51916014-51934354  | 6   | nogene    |
| chr1:46587108-46587570   | 9   | nogene    |
| chr18:47896520-47930446  | 9   | SMAD2     |
| chr20:35381917-35394196  | 5   | UQCC1     |
| chr1:28430288-28430896   | 15  | nogene    |
| chr15:84680712-84691644  | 409 | SEC11A    |
| chr20:47227202-47236516  | 13  | ZMYND8    |
| chr3:170291853-170297393 | 87  | PRKCI     |
| chr1:179110281-179112398 | 30  | ABL2      |
| chr16:68121986-68183366  | 7   | NFATC3    |
| chr2:112485916-112501341 | 11  | TTL       |
| chr15:28220451-28222215  | 19  | HERC2     |
| chr16:58558472-58560362  | 10  | CNOT1     |
| chr4:109527321-109538596 | 10  | SEC24B    |
| chr19:7444203-7444454    | 9   | ARHGEF18  |
| chr3:170136418-170149244 | 16  | PHC3      |
| chr9:112098469-112102285 | 5   | SUSD1     |
| chr1:240123178-240137802 | 11  | FMN2      |
| chr20:28583018-28591519  | 16  | FRG1CP    |
| chr1:44410583-44412722   | 6   | RNF220    |
| chrX:49038009-49040568   | 13  | TFE3      |
| chr12:32599401-32599642  | 6   | nogene    |
| chr10:18585948-18616293  | 20  | NSUN6     |
| chr8:140843946-140890769 | 7   | PTK2      |
| chr1:52860730-52892975   | 16  | ZYG11A    |
| chr2:8770669-8776892     | 93  | KIDINS220 |
| chr3:194644572-194646243 | 7   | LSG1      |
| chr1:233208517-233236980 | 71  | PCNXL2    |
| chr15:90980241-90984140  | 10  | PRC1      |
| chr7:138576372-138579532 | 10  | TRIM24    |
| chr1:109345750-109369589 | 12  | SORT1     |
| chr6:70426438-70452571   | 81  | FAM135A   |
| chr5:1814338-1816054     | 29  | NDUFS6    |

|                           |     |          |
|---------------------------|-----|----------|
| chr6:37312917-37317206    | 25  | TBC1D22B |
| chr8:123372636-123380677  | 7   | ATAD2    |
| chr1:45824432-45959477    | 10  | MAST2    |
| chr17:17866295-17869473   | 13  | TOM1L2   |
| chr2:111863674-111863895  | 89  | ANAPC1   |
| chrX:18506934-18510854    | 23  | CDKL5    |
| chr8:528894-531576        | 10  | nogene   |
| chr15:42511832-42515354   | 11  | SNAP23   |
| chr1:236168705-236178636  | 27  | GPR137B  |
| chr7:5057294-5057779      | 7   | RBAK     |
| chr20:2492698-2494044     | 14  | ZNF343   |
| chr5:50274987-50411383    | 8   | EMB      |
| chr15:34488962-34490796   | 32  | nogene   |
| chr14:103338326-103339803 | 5   | EIF5     |
| chr4:13376544-13428299    | 9   | RAB28    |
| chr12:28255580-28307749   | 209 | CCDC91   |
| chr6:610097-619543        | 28  | EXOC2    |
| chr6:5404541-5431172      | 114 | FARS2    |
| chr7:156762133-156826744  | 11  | LMBR1    |
| chr5:109842327-109847790  | 12  | MAN2A1   |
| chr9:126340507-126386658  | 26  | MVB12B   |
| chr8:144196197-144196451  | 20  | nogene   |
| chr15:75407054-75413045   | 14  | SIN3A    |
| chr6:85565331-85572374    | 16  | SNX14    |
| chr6:43498977-43503706    | 9   | TJAP1    |
| chr2:32678452-32702920    | 9   | TTC27    |
| chr1:212329134-212342280  | 12  | PPP2R5A  |
| chr15:40744046-40745259   | 463 | RMDN3    |
| chr3:136366942-136423044  | 6   | STAG1    |
| chr7:105040838-105066807  | 11  | KMT2E    |
| chr5:139600371-139614966  | 236 | UBE2D2   |
| chr8:130076347-130092143  | 43  | ASAP1    |
| chr7:140739811-140808995  | 12  | BRAF     |
| chr9:94955176-94967801    | 9   | C9orf3   |
| chr9:100016321-100022226  | 9   | ERP44    |
| chr9:100239998-100272986  | 5   | nogene   |
| chr16:742249-742543       | 80  | nogene   |
| chr15:76621763-76665789   | 12  | SCAPER   |
| chr14:30947089-30950944   | 11  | STRN3    |
| chr19:46733038-46738888   | 7   | STRN4    |
| chr1:230943805-230958299  | 7   | TTC13    |
| chr3:125277725-125315053  | 7   | ZNF148   |
| chr2:202290322-202297906  | 9   | NOP58    |

|                           |     |          |
|---------------------------|-----|----------|
| chr2:235930764-235968623  | 101 | AGAP1    |
| chr17:43057051-43063951   | 18  | BRCA1    |
| chr9:135850136-135862608  | 94  | CAMSAP1  |
| chr20:33611093-33611335   | 11  | CBFA2T2  |
| chr10:84438511-84477664   | 172 | CCSER2   |
| chr9:96522505-96565483    | 347 | CDC14B   |
| chr1:3833861-3835092      | 13  | CEP104   |
| chr17:59647397-59651316   | 8   | CLTC     |
| chr17:17260300-17264981   | 7   | COPS3    |
| chr16:3738558-3740549     | 8   | CREBBP   |
| chr6:43196068-43196862    | 12  | CUL9     |
| chr9:123630375-123879021  | 10  | DENND1A  |
| chr1:197642710-197672156  | 8   | DENND1B  |
| chr8:141150833-141168525  | 8   | DENND3   |
| chr9:19288595-19300331    | 26  | DENND4C  |
| chr14:88681889-88688359   | 11  | EML5     |
| chr10:92909426-92920050   | 5   | EXOC6    |
| chr17:30484213-30520021   | 5   | GOSR1    |
| chr11:123594081-123596037 | 14  | GRAMD1B  |
| chr15:41020899-41027736   | 55  | INO80    |
| chr9:7011697-7015929      | 17  | KDM4C    |
| chr17:44933922-44936358   | 21  | KIF18B   |
| chr13:46692535-46728984   | 10  | LRCH1    |
| chr8:88167668-88186598    | 11  | MMP16    |
| chr16:47109482-47122912   | 5   | NETO2    |
| chr10:89792838-89794672   | 20  | nogene   |
| chr3:32282590-32292155    | 10  | nogene   |
| chrX:53097040-53097447    | 7   | nogene   |
| chr7:32812756-32838666    | 18  | nogene   |
| chr4:435769-437511        | 29  | nogene   |
| chr19:17516172-17517850   | 12  | PGLS     |
| chr4:184659339-184678394  | 34  | PRIMPOL  |
| chr1:84179176-84185182    | 34  | PRKACB   |
| chr9:122945331-122986419  | 7   | RABGAP1  |
| chr1:174275832-174371072  | 60  | RABGAP1L |
| chr5:38990948-38996882    | 7   | RICTOR   |
| chr11:74810183-74817714   | 139 | RNF169   |
| chr9:125018798-125056007  | 8   | SCAI     |
| chr4:82874610-82881940    | 64  | SEC31A   |
| chr11:71109940-71119032   | 7   | SHANK2   |
| chr13:21161789-21168399   | 7   | SKA3     |
| chr17:4938338-4938975     | 11  | SLC25A11 |
| chr10:68483419-68493570   | 19  | SLC25A16 |

|                          |     |                 |
|--------------------------|-----|-----------------|
| chr2:27668842-27675692   | 12  | SLC4A1AP        |
| chr7:129205609-129206587 | 16  | SMO             |
| chr1:15911100-15922349   | 5   | SPEN            |
| chr7:43595900-43619723   | 13  | STK17A          |
| chr13:52397231-52402681  | 12  | THSD1           |
| chr3:100372605-100386978 | 9   | TOMM70A         |
| chr3:185921103-185922126 | 316 | TRA2B           |
| chr11:18514677-18516164  | 8   | TSG101          |
| chr8:102346235-102347092 | 28  | UBR5            |
| chr8:27294079-27294310   | 58  | TRIM35          |
| chr1:51814034-51814813   | 11  | NRD1            |
| chrX:124022530-124042645 | 6   | STAG2           |
| chr18:46084503-46095131  | 5   | ATP5A1          |
| chr2:173358711-173363462 | 8   | CDCA7           |
| chr18:76927036-76960855  | 15  | ZNF236          |
| chr1:154967670-154969448 | 5   | SHC1            |
| chr6:16657775-16754091   | 7   | ATXN1           |
| chr2:190901946-190910321 | 7   | GLS             |
| chr18:36195256-36205276  | 26  | MOCOS           |
| chr12:96909751-96920125  | 19  | NEDD1           |
| chrX:24814978-24843677   | 9   | POLA1           |
| chr2:46576086-46576656   | 14  | RHOQ            |
| chr4:139517884-139533366 | 16  | SETD7           |
| chr6:42616001-42632904   | 7   | UBR2            |
| chr13:50027206-50045232  | 7   | DLEU2           |
| chr5:69226337-69228387   | 9   | MRPS36          |
| chr6:126112865-126174911 | 11  | nogene          |
| chr2:227519947-227536993 | 17  | AGFG1           |
| chr5:140504820-140505869 | 19  | ANKHD1-EIF4EBP3 |
| chr17:60460662-60479271  | 11  | APPBP2          |
| chr8:61633682-61684188   | 24  | ASPH            |
| chr3:112537734-112550262 | 27  | ATG3            |
| chr1:147259836-147267518 | 7   | CHD1L           |
| chr16:66617230-66623502  | 7   | CMTM4           |
| chr8:67103036-67132080   | 8   | CSPP1           |
| chr15:44496379-44497138  | 23  | CTDSPL2         |
| chr1:77801330-77807101   | 45  | FAM73A          |
| chr5:148394713-148404822 | 10  | FBXO38          |
| chr5:41927012-41934308   | 10  | FBXO4           |
| chr9:120771347-120776226 | 5   | FBXW2           |
| chr2:9475986-9484550     | 15  | IAH1            |
| chr1:200614317-200615609 | 61  | KIF14           |
| chr9:34286616-34290389   | 45  | KIF24           |

|                           |     |           |
|---------------------------|-----|-----------|
| chr17:43377670-43381660   | 8   | LINC00910 |
| chr5:126804775-126805696  | 19  | LMNB1     |
| chr4:150806270-150849575  | 12  | LRBA      |
| chr7:1936686-2014642      | 15  | MAD1L1    |
| chr16:21612644-21625115   | 98  | METTL9    |
| chr10:97460694-97467583   | 8   | MMS19     |
| chr1:144439828-144456805  | 10  | NBPF15    |
| chrX:91616342-91662446    | 7   | nogene    |
| chr18:35322387-35327063   | 26  | nogene    |
| chr9:33676487-33676667    | 10  | nogene    |
| chr20:51900121-51913814   | 20  | nogene    |
| chr3:13386274-13391307    | 7   | NUP210    |
| chr6:117693041-117694180  | 73  | NUS1      |
| chr10:13127744-13133581   | 11  | OPTN      |
| chr16:14552020-14555709   | 14  | PARN      |
| chr14:71045132-71057724   | 39  | PCNX      |
| chr2:229155817-229202012  | 10  | PID1      |
| chr14:101894506-101909690 | 7   | PPP2R5C   |
| chr1:13778417-13782831    | 9   | PRDM2     |
| chr3:49044389-49057890    | 10  | QRICH1    |
| chr6:13641198-13644729    | 8   | RANBP9    |
| chr20:35716739-35739017   | 8   | RBM39     |
| chr1:175986942-176046324  | 25  | RFWD2     |
| chr16:74644361-74661451   | 61  | RFWD3     |
| chr1:26560725-26561663    | 8   | RPS6KA1   |
| chr11:68180131-68190152   | 11  | SUV420H1  |
| chr8:119801793-119806401  | 7   | TAF2      |
| chr4:38089931-38103157    | 635 | TBC1D1    |
| chr22:46878652-46912188   | 20  | TBC1D22A  |
| chr10:119581921-119588248 | 7   | TIAL1     |
| chr21:31182420-31195305   | 20  | TIAM1     |
| chr9:105721536-105774026  | 43  | TMEM38B   |
| chr2:218737578-218740584  | 13  | TTLL4     |
| chr8:102258984-102269108  | 7   | UBR5      |
| chr7:93252652-93297243    | 12  | VPS50     |
| chr22:40881769-40886515   | 25  | XPNPEP3   |
| chr20:47282101-47347926   | 25  | ZMYND8    |
| chr19:51880322-51880877   | 7   | ZNF577    |
| chr19:23373741-23374764   | 10  | ZNF91     |
| chr1:1839189-1853297      | 32  | GNB1      |
| chr1:5904616-5986327      | 10  | NPHP4     |
| chr19:51896471-51900294   | 10  | ZNF649    |
| chr6:100848147-100849096  | 26  | ASCC3     |



|                          |     |           |
|--------------------------|-----|-----------|
| chr2:53897869-53900017   | 8   | PSME4     |
| chr2:61228644-61232532   | 5   | USP34     |
| chr2:72718102-72721164   | 12  | EXOC6B    |
| chr7:23507419-23513082   | 73  | TRA2A     |
| chr2:214745066-214752555 | 19  | BARD1     |
| chr5:34918363-34923234   | 52  | BRIX1     |
| chr11:76496214-76516312  | 16  | C11orf30  |
| chr3:113010642-113017602 | 18  | C3orf17   |
| chr11:34089394-34090678  | 10  | CAPRIN1   |
| chr2:29133654-29143945   | 12  | CLIP4     |
| chr3:47569151-47572874   | 9   | CSPG5     |
| chr14:39276933-39295029  | 5   | CTAGE5    |
| chr5:119105179-119116336 | 7   | DMXL1     |
| chr7:32620403-32656044   | 8   | DPY19L1P1 |
| chr6:20479845-20482949   | 12  | E2F3      |
| chr9:129923843-129929695 | 11  | FNBP1     |
| chr3:119876412-120093593 | 10  | GSK3B     |
| chr5:138561579-138567722 | 154 | HSPA9     |
| chr3:45400244-45458886   | 7   | LARS2     |
| chr6:136694139-136698751 | 5   | MAP3K5    |
| chr14:75039910-75042477  | 26  | MLH3      |
| chr12:5358269-5367934    | 20  | nogene    |
| chr1:145422795-145423431 | 9   | nogene    |
| chr3:8742458-8753224     | 13  | OXTR      |
| chr10:34372497-34384254  | 35  | PARD3     |
| chr10:34516978-34545288  | 5   | PARD3     |
| chr12:53465931-53471807  | 7   | PCBP2     |
| chr1:75787496-75789356   | 12  | RABGGTB   |
| chr7:155700772-155707068 | 12  | RBM33     |
| chr11:4106045-4109703    | 6   | RRM1      |
| chr3:47661293-47676782   | 6   | SMARCC1   |
| chr17:64562770-64571956  | 26  | SMURF2    |
| chr8:47279861-47291137   | 16  | SPIDR     |
| chr3:177046128-177065022 | 5   | TBL1XR1   |
| chr22:28629551-28629830  | 13  | TTC28     |
| chr22:40868998-40870139  | 19  | XPNPEP3   |
| chr17:12054888-12081530  | 297 | MAP2K4    |
| chr9:85618982-85621285   | 5   | AGTPBP1   |
| chr6:17421554-17426690   | 38  | CAP2      |
| chr16:66938036-66939358  | 93  | CES2      |
| chr1:20825099-20829272   | 9   | EIF4G3    |
| chr1:21002712-21111383   | 33  | EIF4G3    |
| chr5:171891466-171914405 | 6   | FBXW11    |

|                           |     |           |
|---------------------------|-----|-----------|
| chr9:108911009-108919349  | 6   | IKBKAP    |
| chr9:88418777-88475513    | 26  | nogene    |
| chr4:107693770-107701285  | 21  | PAPSS1    |
| chr22:20824325-20838731   | 20  | PI4KA     |
| chr1:174637374-174702256  | 7   | RABGAP1L  |
| chr1:100906851-100913806  | 17  | SLC30A7   |
| chr11:72757766-72759381   | 129 | STARD10   |
| chr19:1625575-1632405     | 16  | TCF3      |
| chr9:136898712-136900520  | 9   | TRAF2     |
| chr10:45625950-45627105   | 13  | ZFAND4    |
| chr1:15626668-15643650    | 13  | DDI2      |
| chr12:31495809-31499671   | 19  | DENND5B   |
| chr15:96269847-96290783   | 9   | NR2F2-AS1 |
| chr8:38788703-38820635    | 18  | TACC1     |
| chr12:104311289-104339273 | 11  | TXNRD1    |
| chr1:246647138-246660334  | 5   | CNST      |
| chr11:118489791-118493230 | 6   | KMT2A     |
| chr1:6227856-6228374      | 12  | nogene    |
| chr19:32655116-32655634   | 10  | nogene    |
| chr16:28169749-28177332   | 14  | XPO6      |
| chr1:93210801-93216746    | 62  | CCDC18    |
| chr11:87355505-87362476   | 9   | nogene    |
| chr5:128519272-128527967  | 7   | FBN2      |
| chr3:197756425-197770244  | 43  | FYTTD1    |
| chr7:156763107-156826744  | 5   | LMBR1     |
| chr6:73479731-73480805    | 5   | MTO1      |
| chr1:43898234-43899727    | 19  | ST3GAL3   |
| chr4:78826036-78845049    | 9   | BMP2K     |
| chr1:93183359-93192106    | 5   | CCDC18    |
| chr12:122777490-122798200 | 13  | CCDC62    |
| chr6:118523801-118566316  | 11  | CEP85L    |
| chr3:38501354-38506968    | 20  | EXOG      |
| chr15:41069569-41074565   | 14  | INO80     |
| chr9:100104497-100126549  | 11  | INVS      |
| chr2:85035015-85035847    | 18  | KCMF1     |
| chr1:66940027-66959743    | 9   | MIER1     |
| chr3:125576188-125580040  | 10  | OSBPL11   |
| chr1:151024610-151025673  | 126 | PRUNE     |
| chr15:90219792-90221765   | 20  | SEMA4B    |
| chr9:96539077-96565483    | 17  | CDC14B    |
| chr16:53228982-53231784   | 23  | CHD9      |
| chr6:36515337-36525642    | 8   | STK38     |
| chr12:110018344-110029635 | 6   | ANKRD13A  |

|                             |     |          |
|-----------------------------|-----|----------|
| chr17:5354358-5368468       | 7   | RABEP1   |
| chr12:19462509-19518113     | 43  | AEBP2    |
| chr10:91992118-92008275     | 19  | BTAF1    |
| chr3:47610065-47610327      | 12  | SMARCC1  |
| chr16:16141172-16142942     | 26  | ABCC1    |
| chr16:89112091-89120913     | 6   | ACSF3    |
| chr1:244432544-244437768    | 6   | ADSS     |
| chr2:9344531-9368519        | 14  | ASAP2    |
| chr17:61776400-61780401     | 210 | BRIP1    |
| chr11:66756352-66762450     | 51  | C11orf80 |
| chr7:90716339-90726812      | 8   | CDK14    |
| chr10:100253420-100262063   | 13  | CWF19L1  |
| chr5:113001083-113001674    | 47  | DCP2     |
| chrX:2211488-2221229        | 10  | DHRX     |
| chr6:15615266-15627475      | 23  | DTNBP1   |
| chr7:107575187-107576592    | 6   | DUS4L    |
| chr1:245017241-245059458    | 11  | EFCAB2   |
| chr8:117818434-117822597    | 24  | EXT1     |
| chr1:27997319-28004419      | 13  | EYA3     |
| chr5:108867766-108872212    | 60  | FER      |
| chr10:13737843-13740577     | 7   | FRMD4A   |
| chr2:24246128-24254431      | 9   | ITSN2    |
| chr7:1980452-2069338        | 9   | MAD1L1   |
| chr2:8943186-8974435        | 25  | MBOAT2   |
| chr4:99028866-99057818      | 7   | METAP1   |
| chr14:75030542-75042477     | 8   | MLH3     |
| chr8:97686667-97691188      | 189 | MTDH     |
| chrX:64354776-64356338      | 6   | MTMR8    |
| chr13:35040932-35110978     | 11  | NBEA     |
| chr12:124362125-124372610   | 6   | NCOR2    |
| chrUn_KI270742v1:1325-34982 | 14  | nogene   |
| chr5:25567671-25572560      | 10  | nogene   |
| chr1:28329576-28329955      | 12  | nogene   |
| chr6:77271339-77316704      | 7   | nogene   |
| chr3:151803705-151803925    | 9   | nogene   |
| chr2:173657935-173693837    | 7   | nogene   |
| chr1:233217898-233236980    | 129 | PCNXL2   |
| chr7:11028680-11051780      | 6   | PHF14    |
| chr12:110536923-110546078   | 62  | PPTC7    |
| chr4:184659339-184666064    | 11  | PRIMPOL  |
| chr15:75517258-75524298     | 20  | PTPN9    |
| chr18:8624937-8633327       | 6   | RAB12    |
| chr6:138941334-138945697    | 8   | REPS1    |

|                           |     |          |
|---------------------------|-----|----------|
| chr21:31700994-31705467   | 25  | SCAF4    |
| chr17:50979745-50995533   | 7   | SPAG9    |
| chr20:62852722-62857638   | 6   | TCFL5    |
| chr7:47368364-47369621    | 8   | TNS3     |
| chr8:142300485-142318634  | 6   | TSNARE1  |
| chr17:78802323-78803978   | 15  | USP36    |
| chr12:56477659-56478262   | 10  | GLS2     |
| chr11:68569747-68583129   | 5   | PPP6R3   |
| chr1:43792101-43838311    | 9   | ST3GAL3  |
| chr3:197081050-197119530  | 298 | DLG1     |
| chr9:111433232-111442424  | 16  | KIAA0368 |
| chr9:116618323-116620443  | 24  | ASTN2    |
| chr21:37420298-37456308   | 110 | DYRK1A   |
| chr16:72950468-72960194   | 19  | ZFHX3    |
| chr14:74691058-74692328   | 12  | AREL1    |
| chr7:7234302-7243750      | 9   | C1GALT1  |
| chr16:21612644-21618074   | 8   | METTL9   |
| chr9:37424844-37426654    | 501 | GRHPR    |
| chr20:38988812-38994880   | 24  | DHX35    |
| chr1:20941490-20950111    | 9   | EIF4G3   |
| chr18:6237963-6312056     | 75  | L3MBTL4  |
| chr4:82970326-82981475    | 9   | LIN54    |
| chr16:48299661-48303305   | 7   | LONP2    |
| chr6:35672591-35680422    | 8   | nogene   |
| chr8:143640578-143641432  | 10  | nogene   |
| chr7:77778337-77778814    | 78  | RSBN1L   |
| chr4:138214584-138242061  | 8   | SLC7A11  |
| chr15:43002554-43025429   | 24  | UBR1     |
| chr10:110124016-110132400 | 9   | ADD3     |
| chr1:155352705-155360409  | 18  | ASH1L    |
| chr3:11358417-11364734    | 86  | ATG7     |
| chr7:39987598-39988258    | 207 | CDK13    |
| chr11:46783273-46788773   | 58  | CKAP5    |
| chr2:29121373-29135666    | 122 | CLIP4    |
| chrX:16667513-16683226    | 5   | CTPS2    |
| chr7:102227366-102227669  | 208 | CUX1     |
| chr1:63478763-63490218    | 14  | ITGB3BP  |
| chr10:92637183-92645642   | 17  | KIF11    |
| chr18:50895808-50921187   | 11  | ME2      |
| chr22:29978441-29998857   | 28  | MTMR3    |
| chr10:32623718-32635158   | 9   | nogene   |
| chrX:121090398-121164157  | 14  | nogene   |
| chr9:96895895-96898127    | 13  | nogene   |

|                           |      |         |
|---------------------------|------|---------|
| chr15:24998325-25000606   | 6    | nogene  |
| chr7:29923955-29969013    | 5    | nogene  |
| chr10:49841949-49861663   | 20   | PARG    |
| chr8:51860860-51861246    | 18   | PCMTD1  |
| chr6:42972882-42975038    | 213  | PEX6    |
| chr11:86014869-86031611   | 9    | PICALM  |
| chr17:1534098-1535518     | 10   | PITPNA  |
| chr2:135645378-135680324  | 18   | R3HDM1  |
| chr6:154787860-154792976  | 78   | SCAF8   |
| chr1:86715723-86719635    | 95   | SH3GLB1 |
| chr19:16081912-16093753   | 40   | TPM4    |
| chr5:14293011-14304592    | 32   | TRIO    |
| chr14:90730074-90786328   | 35   | TTC7B   |
| chr2:112485916-112494375  | 18   | TTL     |
| chr8:102360070-102361626  | 1053 | UBR5    |
| chr8:99431536-99521010    | 21   | VPS13B  |
| chr16:74948518-74956610   | 16   | WDR59   |
| chr18:62539680-62565096   | 9    | ZCCHC2  |
| chr20:51712965-51729978   | 105  | ATP9A   |
| chr19:5047475-5071059     | 12   | KDM4B   |
| chr9:6420911-6421142      | 13   | UHRF2   |
| chr12:122489385-122492789 | 50   | ZCCHC8  |
| chr12:49004963-49013110   | 10   | PRKAG1  |
| chr2:38818876-38819144    | 7    | DHX57   |
| chr1:15770408-15774796    | 7    | FBLIM1  |
| chr17:43047642-43057135   | 21   | BRCA1   |
| chr5:27472382-27485029    | 7    | nogene  |
| chr13:100307191-100340259 | 9    | PCCA    |
| chr1:243545509-243563848  | 19   | AKT3    |
| chr10:125038996-125133612 | 26   | CTBP2   |
| chr3:197136541-197149796  | 28   | DLG1    |
| chr1:8872654-8874334      | 53   | nogene  |
| chr13:26609328-26613058   | 17   | WASF3   |
| chr7:99476402-99479787    | 6    | ZNF789  |
| chr7:148729961-148730283  | 15   | CUL1    |
| chr8:25366869-25369641    | 20   | DOCK5   |
| chr6:592468-637861        | 9    | EXOC2   |
| chr5:163471184-163471463  | 23   | HMMR    |
| chr6:13632369-13658832    | 40   | RANBP9  |
| chr6:135318518-135428759  | 10   | AHI1    |
| chr20:51674152-51690819   | 121  | ATP9A   |
| chr10:21651672-21670704   | 10   | MLLT10  |
| chr10:70217811-70218817   | 14   | PPA1    |

|                           |    |          |
|---------------------------|----|----------|
| chr12:112502143-112506422 | 6  | PTPN11   |
| chr6:166328275-166330247  | 10 | SFT2D1   |
| chr2:97813970-97818721    | 23 | TMEM131  |
| chr10:74070669-74074903   | 18 | VCL      |
| chr8:103420263-103421082  | 30 | DCAF13   |
| chr16:57435786-57436253   | 20 | nogene   |
| chr10:11509594-11597717   | 10 | USP6NL   |
| chr3:196927795-196932023  | 18 | SENP5    |
| chr7:66941847-66948694    | 47 | TMEM248  |
| chr3:184849070-184870805  | 14 | VPS8     |
| chr1:20767583-20773610    | 7  | HP1BP3   |
| chr16:12061527-12078915   | 7  | SNX29    |
| chr5:73078179-73082825    | 43 | FCHO2    |
| chr18:21768622-21779685   | 10 | MIB1     |
| chr11:67181319-67207688   | 12 | KDM2A    |
| chr20:34575103-34588607   | 5  | PIGU     |
| chr1:197642710-197772932  | 28 | DENND1B  |
| chr9:128523279-128523846  | 14 | GLE1     |
| chr16:11774235-11779363   | 20 | ZC3H7A   |
| chr12:56282419-56282991   | 42 | CS       |
| chr5:151786571-151800869  | 40 | G3BP1    |
| chr15:59080935-59081284   | 9  | RNF111   |
| chr7:7877280-7899036      | 5  | UMAD1    |
| chr1:93876267-93877862    | 24 | DNTTIP2  |
| chr8:98104488-98108751    | 19 | HRSP12   |
| chr1:53923903-53940097    | 18 | HSPB11   |
| chr12:2822793-2824252     | 53 | ITFG2    |
| chr17:16186553-16194639   | 27 | NCOR1    |
| chr11:64927801-64930589   | 11 | PPP2R5B  |
| chr9:125543058-125559809  | 29 | MAPKAP1  |
| chr1:94458606-94468007    | 11 | ABCD3    |
| chr1:179118586-179121867  | 36 | ABL2     |
| chr1:180314691-180413471  | 11 | ACBD6    |
| chr1:180397515-180430262  | 86 | ACBD6    |
| chr2:235797758-235799522  | 30 | AGAP1    |
| chr19:32631401-32642145   | 18 | ANKRD27  |
| chr19:46845992-46846824   | 10 | AP2S1    |
| chr4:36210389-36229645    | 13 | ARAP2    |
| chr4:147906637-147913178  | 10 | ARHGAP10 |
| chr17:12908896-12919831   | 28 | ARHGAP44 |
| chr11:120440128-120447085 | 8  | ARHGEF12 |
| chr2:218238663-218239484  | 29 | ARPC2    |
| chr20:51674152-51697482   | 9  | ATP9A    |

|                           |     |          |
|---------------------------|-----|----------|
| chr22:45793544-45807022   | 95  | ATXN10   |
| chr17:83014453-83048785   | 14  | B3GNTL1  |
| chr2:214780559-214797117  | 19  | BARD1    |
| chr20:50876485-50877587   | 12  | BCAS4    |
| chr11:102350345-102368548 | 6   | BIRC2    |
| chr2:32377587-32392150    | 29  | BIRC6    |
| chr1:32383829-32386895    | 5   | BSDC1    |
| chr11:46987207-47052518   | 6   | C11orf49 |
| chr10:118701305-118730410 | 27  | CACUL1   |
| chr6:17540972-17551604    | 7   | CAP2     |
| chr1:112647209-112659779  | 6   | CAPZA1   |
| chr15:44328684-44332078   | 16  | CASC4    |
| chrX:41626603-41671530    | 8   | CASK     |
| chr2:113460672-113482228  | 11  | CBWD2    |
| chr2:108839184-108850755  | 12  | CCDC138  |
| chr2:61876094-61883548    | 17  | CCT4     |
| chr13:26400452-26401624   | 117 | CDK8     |
| chr19:4433069-4433539     | 9   | CHAF1A   |
| chr2:121515664-121530325  | 36  | CLASP1   |
| chr4:77773080-77776392    | 476 | CNOT6L   |
| chr9:121161855-121166180  | 60  | CNTRL    |
| chr16:23413447-23418827   | 18  | COG7     |
| chr6:99375939-99380341    | 36  | COQ3     |
| chr5:138886211-138925407  | 8   | CTNNA1   |
| chr11:108094390-108098529 | 8   | CUL5     |
| chr1:173830659-173833499  | 11  | DARS2    |
| chr4:182891402-182894605  | 17  | DCTD     |
| chr5:150753478-150756487  | 10  | DCTN4    |
| chr4:51863436-51914078    | 6   | DCUN1D4  |
| chr11:82914722-82931849   | 23  | DDIAS    |
| chr11:11998695-12008608   | 8   | DKK3     |
| chr16:46964610-46967646   | 6   | DNAJA2   |
| chr7:103316829-103319678  | 11  | DNAJC2   |
| chr5:31431575-31451640    | 19  | DROSHA   |
| chr6:15615266-15652140    | 7   | DTNBP1   |
| chr16:2246094-2246986     | 23  | ECI1     |
| chr8:131940498-131946633  | 350 | EFR3A    |
| chr2:62707163-62831158    | 7   | EHBP1    |
| chr2:62987930-62996766    | 13  | EHBP1    |
| chr1:44881611-44897444    | 8   | EIF2B3   |
| chr3:184140079-184140730  | 10  | EIF2B5   |
| chr3:186784563-186786051  | 25  | EIF4A2   |
| chr1:20857402-20862332    | 6   | EIF4G3   |

|                           |     |           |
|---------------------------|-----|-----------|
| chrX:130069299-130072417  | 14  | ELF4      |
| chr7:37948839-37950392    | 42  | EPDR1     |
| chr7:133356329-133375002  | 7   | EXOC4     |
| chr10:92893348-92909631   | 54  | EXOC6     |
| chr8:117830229-117837201  | 8   | EXT1      |
| chr9:93527154-93550691    | 10  | FAM120A   |
| chr10:119107947-119123569 | 11  | FAM45A    |
| chrX:14843659-14859334    | 34  | FANCB     |
| chr1:224130471-224134212  | 9   | FBXO28    |
| chr20:6096901-6097631     | 12  | FERMT1    |
| chr12:95208842-95211267   | 7   | FGD6      |
| chr2:152560882-152581049  | 7   | FMNL2     |
| chr5:131698916-131744690  | 8   | FNIP1     |
| chr9:20715321-20720534    | 94  | FOCAD     |
| chr9:20715321-20789608    | 43  | FOCAD     |
| chr16:70468848-70469323   | 8   | FUK       |
| chr5:151786571-151791062  | 104 | G3BP1     |
| chr1:230236013-230243427  | 16  | GALNT2    |
| chr6:53520777-53522527    | 28  | GCLC      |
| chr10:5785851-5800705     | 196 | GDI2      |
| chr7:80199224-80203832    | 10  | GNAI1     |
| chr22:23095246-23096418   | 18  | GNAZ      |
| chr3:37251394-37282272    | 14  | GOLGA4    |
| chr1:155795049-155814449  | 24  | GON4L     |
| chr9:130075635-130083602  | 7   | GPR107    |
| chr1:168104476-168114549  | 13  | GPR161    |
| chr8:30700080-30703240    | 18  | GSR       |
| chr6:57919783-57924591    | 21  | GUSBP4    |
| chr10:67988662-68073686   | 7   | HERC4     |
| chr22:35262322-35293743   | 31  | HMGXB4    |
| chr8:42925556-42964474    | 13  | HOOK3     |
| chr15:98707561-98708107   | 90  | IGF1R     |
| chr1:156530104-156531247  | 5   | IQGAP3    |
| chr20:34424479-34438631   | 9   | ITCH      |
| chr12:26550246-26580155   | 7   | ITPR2     |
| chr13:30208514-30283791   | 12  | KATNAL1   |
| chr11:108477606-108491167 | 11  | KDELC2    |
| chr13:46368041-46387879   | 7   | KIAA0226L |
| chr9:111391755-111394305  | 10  | KIAA0368  |
| chr9:112574056-112575251  | 390 | KIAA1958  |
| chr1:10267379-10268263    | 30  | KIF1B     |
| chr2:207123773-207124404  | 8   | KLF7      |
| chr1:6599046-6599452      | 28  | KLHL21    |



|                           |     |              |
|---------------------------|-----|--------------|
| chr3:122437169-122442116  | 33  | KPNA1        |
| chr7:92213194-92214777    | 13  | KRIT1        |
| chr15:51959898-51960733   | 6   | LEO1         |
| chr7:156724111-156734257  | 36  | LMBR1        |
| chr8:89722014-89725641    | 15  | LOC101929709 |
| chr4:150798080-150831976  | 43  | LRBA         |
| chr1:235800319-235801097  | 10  | LYST         |
| chr3:185437446-185443636  | 20  | MAP3K13      |
| chr14:70800666-70801080   | 17  | MAP3K9       |
| chr12:111865249-111880527 | 8   | MAPKAPK5     |
| chr5:10415487-10426522    | 9   | 6-Mar        |
| chr2:159743060-159748903  | 13  | 7-Mar        |
| chr18:54155237-54166166   | 21  | MBD2         |
| chr1:84947032-84958702    | 8   | MCOLN2       |
| chr11:86446313-86448255   | 14  | ME3          |
| chr1:29216004-29216812    | 11  | MECR         |
| chr17:61992539-62011233   | 7   | MED13        |
| chr12:116205052-116237705 | 15  | MED13L       |
| chr10:124760385-124774782 | 12  | METTTL10     |
| chr14:21503172-21503881   | 876 | METTTL3      |
| chr17:76767385-76776541   | 28  | MFSD11       |
| chr18:21819494-21847125   | 10  | MIB1         |
| chr11:122155550-122202909 | 15  | MIR100HG     |
| chr5:80787564-80792844    | 26  | MSH3         |
| chr11:47627079-47631087   | 16  | MTCH2        |
| chr15:79889092-79889354   | 10  | MTHFS        |
| chr1:236835546-236853088  | 7   | MTR          |
| chr2:176296859-176337577  | 37  | MTX2         |
| chr5:53603451-53604895    | 9   | NDUFS4       |
| chr12:8095600-8096312     | 5   | NECAP1       |
| chr1:16447869-16452015    | 26  | NECAP2       |
| chr12:96909751-96917737   | 7   | NEDD1        |
| chr15:73176402-73178427   | 19  | NEO1         |
| chr5:43655839-43677806    | 13  | NNT          |
| chr12:5160306-5171889     | 40  | nogene       |
| chrX:152574135-152574980  | 15  | nogene       |
| chr1:240092041-240092400  | 9   | nogene       |
| chrX:135942878-135960073  | 9   | nogene       |
| chr11:28916880-28922625   | 9   | nogene       |
| chr5:150367868-150368846  | 9   | nogene       |
| chr1:47368486-47373075    | 6   | nogene       |
| chrX:74277947-74278679    | 10  | nogene       |
| chr12:121291123-121291811 | 10  | nogene       |

|                           |     |         |
|---------------------------|-----|---------|
| chr16:29807306-29807824   | 15  | nogene  |
| chr12:87648516-87651983   | 7   | nogene  |
| chr12:5377776-5378105     | 5   | nogene  |
| chr3:161284716-161285241  | 10  | nogene  |
| chr19:653711-654297       | 5   | nogene  |
| chr4:80335743-80376917    | 6   | nogene  |
| chr2:171016000-171016251  | 40  | nogene  |
| chr11:29230935-29384112   | 8   | nogene  |
| chr4:148435103-148436862  | 213 | NR3C2   |
| chr5:177248180-177260168  | 6   | NSD1    |
| chr7:33026816-33035988    | 7   | NT5C3A  |
| chr9:131174054-131178410  | 56  | NUP214  |
| chr16:56837607-56839604   | 38  | NUP93   |
| chr11:3727074-3753408     | 5   | NUP98   |
| chr1:58527260-58536741    | 48  | OMA1    |
| chrX:68081700-68206673    | 7   | OPHN1   |
| chr22:30741160-30743835   | 11  | OSBP2   |
| chr11:77332729-77353599   | 15  | PAK1    |
| chr4:39872985-39890364    | 24  | PDS5A   |
| chr13:32753331-32760720   | 7   | PDS5B   |
| chr3:170117225-170122744  | 13  | PHC3    |
| chr20:35847349-35863400   | 32  | PHF20   |
| chrX:53987077-53987944    | 34  | PHF8    |
| chr10:13291830-13298245   | 7   | PHYH    |
| chr10:13283689-13295606   | 13  | PHYH    |
| chr11:86012280-86031611   | 50  | PICALM  |
| chr11:17105168-17112666   | 16  | PIK3C2A |
| chr3:179203543-179204588  | 11  | PIK3CA  |
| chr6:99412550-99416428    | 18  | PNISR   |
| chr22:43926934-43928889   | 13  | PNPLA3  |
| chr2:55683784-55687705    | 12  | PNPT1   |
| chr10:70204872-70209685   | 32  | PPA1    |
| chr10:119172381-119174592 | 11  | PRDX3   |
| chr1:171579353-171584526  | 10  | PRRC2C  |
| chr14:73147794-73173707   | 275 | PSEN1   |
| chr9:15486005-15490124    | 7   | PSIP1   |
| chr2:53866084-53887467    | 9   | PSME4   |
| chr9:112262434-112297916  | 585 | PTBP3   |
| chr8:140864311-140912467  | 5   | PTK2    |
| chr18:8113485-8143779     | 11  | PTPRM   |
| chr7:105481051-105506273  | 32  | PUS7    |
| chr9:121190553-121193419  | 9   | RAB14   |
| chr4:13376544-13460828    | 11  | RAB28   |

|                           |     |         |
|---------------------------|-----|---------|
| chr17:5338018-5346925     | 13  | RABEP1  |
| chr9:122957010-123020459  | 24  | RABGAP1 |
| chr14:67885868-67887204   | 13  | RAD51B  |
| chr17:58696692-58709990   | 9   | RAD51C  |
| chr1:64802975-64814840    | 14  | RAVER2  |
| chr16:74636345-74637970   | 101 | RFWD3   |
| chr10:119515508-119527424 | 45  | RGS10   |
| chr9:5656582-5666072      | 9   | RIC1    |
| chr2:86740926-86753558    | 232 | RMND5A  |
| chr1:145771710-145794196  | 7   | RNF115  |
| chr9:35546429-35548535    | 350 | RUSC2   |
| chr3:128081253-128087808  | 26  | RUVBL1  |
| chr6:130175840-130222813  | 7   | SAMD3   |
| chr2:199323802-199381820  | 16  | SATB2   |
| chr5:78415519-78421960    | 190 | SCAMP1  |
| chr14:30670255-30708065   | 13  | SCFD1   |
| chr4:82856951-82857764    | 11  | SEC31A  |
| chr2:179172119-179191866  | 17  | SESTD1  |
| chr10:7283903-7285954     | 18  | SFMBT2  |
| chr10:116944923-116948997 | 13  | SHTN1   |
| chr5:176313690-176324757  | 23  | SIMC1   |
| chr1:2302977-2304585      | 36  | SKI     |
| chr7:5287805-5291821      | 8   | SLC29A4 |
| chr4:42018110-42039053    | 15  | SLC30A9 |
| chr2:113723103-113735858  | 8   | SLC35F5 |
| chr4:102304316-102315739  | 5   | SLC39A8 |
| chr6:70732377-70773425    | 49  | SMAP1   |
| chr9:70277309-70286271    | 7   | SMC5    |
| chr15:75617407-75621056   | 56  | SNUPN   |
| chr1:179302676-179335657  | 8   | SOAT1   |
| chr18:12506476-12512531   | 13  | SPIRE1  |
| chr16:30728965-30729572   | 447 | SRCAP   |
| chr16:30720712-30722286   | 9   | SRCAP   |
| chr12:63983946-63997128   | 12  | SRGAP1  |
| chr12:108792285-108792829 | 27  | SSH1    |
| chr8:98526741-98596169    | 5   | STK3    |
| chr12:130806981-130808704 | 10  | STX2    |
| chr17:37561194-37571987   | 9   | SYNRG   |
| chr6:121223235-121242339  | 7   | TBC1D32 |
| chr15:56919891-57091891   | 21  | TCF12   |
| chr2:74003109-74080591    | 5   | TET3    |
| chr1:246540937-246551302  | 9   | TFB2M   |
| chr3:100713642-100720058  | 12  | TFG     |

|                           |     |          |
|---------------------------|-----|----------|
| chrX:123665641-123712908  | 7   | THOC2    |
| chr15:29737263-29762438   | 9   | TJP1     |
| chr12:26990449-26996862   | 7   | TM7SF3   |
| chr7:130201849-130202663  | 10  | TMEM209  |
| chr19:12714820-12715710   | 7   | TNPO2    |
| chr7:128989960-128993914  | 18  | TNPO3    |
| chr16:3675323-3690985     | 8   | TRAP1    |
| chr6:123331878-123382147  | 6   | TRDN     |
| chrX:101020486-101038051  | 6   | TRMT2B   |
| chr5:160064931-160065766  | 8   | TTC1     |
| chr1:154249238-154251653  | 20  | UBAP2L   |
| chr15:82404611-82414804   | 19  | UBE2Q2P2 |
| chr9:33900173-33912098    | 6   | UBE2R2   |
| chr8:102327741-102346395  | 59  | UBR5     |
| chr3:196369420-196403019  | 5   | UBXN7    |
| chr17:31865365-31878781   | 20  | UTP6     |
| chr10:75219062-75219356   | 31  | VDAC2    |
| chr2:159282671-159283093  | 13  | WDSUB1   |
| chr8:86411537-86411874    | 8   | WWP1     |
| chr9:37126311-37206494    | 21  | ZCCHC7   |
| chr3:125313307-125331233  | 9   | ZNF148   |
| chr3:44455120-44455696    | 17  | ZNF445   |
| chr18:76370527-76380303   | 24  | ZNF516   |
| chr19:37707913-37711692   | 23  | ZNF607   |
| chr19:40081818-40084798   | 11  | ZNF780A  |
| chr4:145823421-145849561  | 108 | ZNF827   |
| chr19:52373110-52374427   | 60  | ZNF880   |
| chr19:23374637-23376330   | 8   | ZNF91    |
| chr22:41117186-41117821   | 20  | EP300    |
| chr11:46493607-46512813   | 73  | AMBRA1   |
| chr3:56139508-56149132    | 11  | ERC2     |
| chr18:21791373-21812468   | 6   | MIB1     |
| chr18:1269669-1278633     | 14  | nogene   |
| chr21:44079563-44080127   | 17  | TRAPPC10 |
| chr1:155670319-155771217  | 20  | YY1AP1   |
| chr5:136153591-136163391  | 15  | SMAD5    |
| chr4:38089931-38125131    | 19  | TBC1D1   |
| chr13:95986332-95999307   | 5   | UGGT2    |
| chr18:79126266-79154555   | 108 | ATP9B    |
| chr14:105226068-105241414 | 24  | BRF1     |
| chr9:74996446-75017448    | 74  | CARNMT1  |
| chrX:16698235-16702941    | 13  | CTPS2    |
| chr14:72714422-72731934   | 42  | DPF3     |

|                           |      |          |
|---------------------------|------|----------|
| chr7:6044561-6050045      | 19   | EIF2AK1  |
| chr12:1027747-1371977     | 7    | ERC1     |
| chr8:129871374-129903350  | 19   | FAM49B   |
| chr16:89752137-89762022   | 9    | FANCA    |
| chr4:173224113-173248440  | 7    | GALNT7   |
| chr12:112269703-112273795 | 20   | HECTD4   |
| chr11:67180078-67207688   | 9    | KDM2A    |
| chr12:122544158-122547969 | 21   | KNTC1    |
| chr10:72508154-72566794   | 7    | MICU1    |
| chr1:61332511-61359274    | 7    | NFIA     |
| chr14:102743477-102743710 | 14   | nogene   |
| chr11:67873205-67874489   | 10   | nogene   |
| chr1:51827795-51834170    | 74   | NRD1     |
| chr10:13123994-13136897   | 7    | OPTN     |
| chr18:24280841-24377535   | 16   | OSBPL1A  |
| chr1:233090060-233112966  | 11   | PCNXL2   |
| chr15:85113872-85117839   | 9    | PDE8A    |
| chr12:79828319-79872938   | 9    | PPP1R12A |
| chr1:31028795-31059439    | 5    | PUM1     |
| chr2:135602499-135605016  | 158  | R3HDM1   |
| chr15:55223888-55230486   | 9    | RAB27A   |
| chr4:37631384-37638504    | 1589 | RELL1    |
| chr12:118019071-118028030 | 29   | RFC5     |
| chr19:11033289-11035132   | 9    | SMARCA4  |
| chr16:30733279-30734008   | 46   | SRCAP    |
| chr1:47280240-47282459    | 205  | STIL     |
| chr6:149378017-149379518  | 8    | TAB2     |
| chr3:51674270-51684634    | 14   | TEX264   |
| chr9:71694508-71698204    | 9    | TMEM2    |
| chr2:112502911-112503181  | 31   | TTL      |
| chr8:48043032-48043626    | 37   | UBE2V2   |
| chr13:95832926-95837202   | 128  | UGGT2    |
| chr15:40902615-40903831   | 64   | VPS18    |
| chr4:176149806-176151967  | 52   | WDR17    |
| chr8:76704042-76708048    | 14   | ZFHX4    |
| chr14:49802452-49806133   | 7    | NEMF     |
| chr20:13483226-13630152   | 7    | TASP1    |
| chr1:46077514-46131956    | 10   | PIK3R3   |
| chr4:7855465-7872080      | 26   | AFAP1    |
| chr16:934189-954666       | 31   | LMF1     |
| chrX:150445453-150462846  | 10   | MAMLD1   |
| chr11:63669077-63669316   | 8    | nogene   |
| chr2:237973091-237973776  | 14   | UBE2F    |

|                           |     |           |
|---------------------------|-----|-----------|
| chr19:57876915-57889008   | 11  | ZNF814    |
| chr10:125110989-125122868 | 384 | CTBP2     |
| chr15:76841733-76883876   | 61  | SCAPER    |
| chr19:12457430-12466850   | 6   | ZNF709    |
| chrX:102825992-102865152  | 9   | LINC00630 |
| chr12:123309309-123315660 | 9   | SBNO1     |
| chr17:60889694-60924500   | 7   | BCAS3     |
| chr5:6761219-6764872      | 17  | nogene    |
| chr6:87601783-87612248    | 9   | ORC3      |
| chr19:5650977-5654456     | 19  | SAFB      |
| chr14:31306731-31309182   | 23  | HEATR5A   |
| chr19:32937630-32966466   | 12  | CEP89     |
| chr2:36464533-36522313    | 11  | CRIM1     |
| chr6:131884930-131886724  | 13  | ENPP1     |
| chr9:92256679-92260234    | 37  | IARS      |
| chr16:31120185-31128139   | 10  | KAT8      |
| chr6:150955994-151037117  | 13  | MTHFD1L   |
| chr2:15394226-15417712    | 17  | NBAS      |
| chr19:52585239-52592228   | 9   | nogene    |
| chr5:50788522-50797233    | 12  | PARP8     |
| chr9:126962224-126977745  | 14  | RALGPS1   |
| chr17:80707840-80709114   | 8   | RPTOR     |
| chr22:31580271-31589577   | 6   | SFI1      |
| chr7:832504-833194        | 8   | SUN1      |
| chr22:25661575-25674528   | 19  | ADRBK2    |
| chr15:34930257-34942080   | 6   | AQR       |
| chr16:88004294-88018667   | 8   | BANP      |
| chr7:73539881-73543644    | 9   | BCL7B     |
| chr4:113500462-113531299  | 10  | CAMK2D    |
| chr11:10800730-10802209   | 14  | EIF4G2    |
| chr12:5169153-5171889     | 8   | nogene    |
| chr12:131939172-131941983 | 13  | PUS1      |
| chr2:135090997-135113270  | 9   | RAB3GAP1  |
| chr2:226839408-226914351  | 32  | RHBDD1    |
| chr1:47260288-47269866    | 6   | STIL      |
| chr6:3157406-3226669      | 48  | TUBB2A    |
| chr7:157216866-157225539  | 8   | UBE3C     |
| chr6:41871563-41907287    | 10  | USP49     |
| chr11:66759042-66762450   | 70  | C11orf80  |
| chrX:85978766-86027557    | 80  | CHM       |
| chr1:21089137-21123555    | 14  | EIF4G3    |
| chr10:97436416-97437750   | 139 | EXOSC1    |
| chr15:43753823-43756766   | 55  | PDIA3     |

|                           |     |                 |
|---------------------------|-----|-----------------|
| chr8:139988725-140024079  | 9   | TRAPPC9         |
| chr11:77622499-77629899   | 46  | CLNS1A          |
| chr12:11028400-11121180   | 9   | nogene          |
| chr2:241246751-241268541  | 8   | HDLBP           |
| chr1:235480053-235484515  | 7   | B3GALNT2        |
| chr17:63756239-63756570   | 8   | CCDC47          |
| chr8:74314860-74315620    | 6   | JPH1            |
| chr10:113876520-113884380 | 86  | NHLRC2          |
| chr5:143295459-143300763  | 21  | NR3C1           |
| chr12:122935271-122940995 | 10  | ABCB9           |
| chr2:108659604-108673029  | 17  | LIMS1           |
| chr10:92504793-92537550   | 9   | IDE             |
| chr12:50427761-50454417   | 6   | LARP4           |
| chr11:78465875-78478683   | 24  | NARS2           |
| chr16:70762539-70763025   | 6   | VAC14           |
| chr20:56382984-56386533   | 10  | AURKA           |
| chr20:49639677-49640665   | 77  | B4GALT5         |
| chr5:139317052-139319033  | 21  | MATR3           |
| chr3:196361843-196372042  | 9   | UBXN7           |
| chr3:195381008-195411009  | 8   | ACAP2           |
| chr1:6281101-6294980      | 19  | ACOT7           |
| chr5:140440118-140441142  | 13  | ANKHD1-EIF4EBP3 |
| chr11:129062279-129066868 | 78  | ARHGAP32        |
| chr1:62816574-62841547    | 9   | ATG4C           |
| chrX:80699956-80704846    | 33  | BRWD3           |
| chr2:61873001-61879011    | 10  | CCT4            |
| chr4:55959681-55965859    | 7   | CEP135          |
| chr19:32915336-32915517   | 12  | CEP89           |
| chr1:9740657-9741256      | 50  | CLSTN1          |
| chr12:70278131-70285586   | 8   | CNOT2           |
| chr8:141151618-141155989  | 16  | DENND3          |
| chr12:1104749-1141787     | 101 | ERC1            |
| chr2:131071854-131082657  | 45  | FAM168B         |
| chr9:95135345-95172147    | 8   | FANCC           |
| chr2:241403827-241407615  | 20  | FARP2           |
| chr2:36581289-36591011    | 37  | FEZ2            |
| chr10:102362474-102365599 | 14  | GBF1            |
| chr1:170539209-170544845  | 7   | GORAB           |
| chr16:46906841-46909927   | 11  | GPT2            |
| chr6:104730302-104750472  | 8   | HACE1           |
| chr1:6231901-6233643      | 74  | ICMT            |
| chr7:128400094-128401116  | 11  | IMPDH1          |
| chr12:122544158-122546674 | 9   | KNTC1           |

|                           |     |              |
|---------------------------|-----|--------------|
| chr2:191693202-191693416  | 9   | LOC105747689 |
| chr4:150735257-150896456  | 19  | LRBA         |
| chr2:31883385-31920910    | 27  | MEMO1        |
| chr13:23798723-23837756   | 12  | MIPEP        |
| chr1:11247624-11248094    | 12  | MTOR         |
| chr4:17814852-17815358    | 342 | NCAPG        |
| chr17:31223443-31227606   | 19  | NF1          |
| chr6:141900322-141927052  | 8   | nogene       |
| chr9:37160064-37165935    | 9   | nogene       |
| chr3:17562018-17733460    | 6   | nogene       |
| chr5:85805306-85821466    | 65  | nogene       |
| chr2:219917762-219940777  | 8   | nogene       |
| chr3:48548531-48550234    | 19  | PFKFB4       |
| chr10:22607926-22609717   | 51  | PIP4K2A      |
| chr2:158533179-158577383  | 24  | PKP4         |
| chr12:42374955-42398994   | 8   | PPHLN1       |
| chr10:87875404-87952259   | 8   | PTEN         |
| chr6:128078812-128089992  | 16  | PTPRK        |
| chr6:127280230-127287007  | 19  | RNF146       |
| chr7:5641153-5652510      | 123 | RNF216       |
| chr19:47143493-47155213   | 57  | SAE1         |
| chr4:128936654-128943188  | 7   | SCLT1        |
| chr6:2836107-2840594      | 6   | SERPINB1     |
| chrX:136022585-136033493  | 40  | SLC9A6       |
| chrX:129504733-129511983  | 11  | SMARCA1      |
| chr18:2738396-2739520     | 9   | SMCHD1       |
| chr16:30298376-30301358   | 7   | SMG1P5       |
| chr4:185247293-185267155  | 877 | SNX25        |
| chr9:100320264-100330169  | 23  | TEX10        |
| chr1:10149183-10151561    | 6   | UBE4B        |
| chr12:101308184-101319635 | 6   | UTP20        |
| chr2:63433744-63439855    | 30  | WDPCP        |
| chr6:43570501-43570994    | 70  | XPO5         |
| chr3:141368620-141427821  | 8   | ZBTB38       |
| chr15:78493908-78497311   | 9   | IREB2        |
| chr1:113614600-113622994  | 8   | MAGI3        |
| chr5:112818965-112828972  | 16  | APC          |
| chr11:129123445-129127305 | 68  | ARHGAP32     |
| chr21:39264459-39298582   | 8   | BRWD1        |
| chr21:39247700-39258672   | 24  | BRWD1        |
| chr8:86515461-86531229    | 14  | CPNE3        |
| chr3:51159243-51160702    | 19  | DOCK3        |
| chr7:22977340-22991139    | 7   | FAM126A      |



|                           |     |          |
|---------------------------|-----|----------|
| chr6:149572284-149580723  | 11  | GINM1    |
| chr1:88859881-88860286    | 10  | GTF2B    |
| chr10:67954594-68044563   | 9   | HERC4    |
| chr4:165263196-165297725  | 7   | KLHL2    |
| chr16:48252130-48256741   | 9   | LONP2    |
| chr7:131375423-131411383  | 19  | MKLN1    |
| chr2:42640172-42656302    | 7   | MTA3     |
| chr1:220212886-220213979  | 6   | RAB3GAP2 |
| chr3:186791724-186804724  | 26  | RFC4     |
| chr20:38057531-38059520   | 18  | RPRD1B   |
| chr9:109080838-109093591  | 16  | TMEM245  |
| chr6:110887504-110890356  | 590 | AMD1     |
| chr14:52652238-52666495   | 11  | ERO1A    |
| chr3:153164765-153247531  | 7   | nogene   |
| chr3:178908521-178909706  | 15  | nogene   |
| chr1:152226425-152251758  | 29  | nogene   |
| chr15:56115288-56115696   | 13  | nogene   |
| chr6:78997413-79026164    | 7   | PHIP     |
| chr3:136102006-136106322  | 8   | PPP2R3A  |
| chr12:120562944-120563943 | 25  | RNF10    |
| chr3:149846010-149912083  | 78  | RNF13    |
| chr2:237973091-237973747  | 40  | UBE2F    |
| chr2:61229547-61236389    | 6   | USP34    |
| chr6:43549488-43555964    | 79  | XPO5     |
| chr5:175492094-175512196  | 20  | SFXN1    |
| chr3:167653260-167658326  | 13  | WDR49    |
| chr10:79118914-79162133   | 21  | ZMIZ1    |
| chr9:123757702-123792630  | 47  | DENND1A  |
| chr17:18299558-18306966   | 9   | TOP3A    |
| chr10:73396518-73400857   | 362 | ANXA7    |
| chr15:65756139-65761438   | 28  | DENND4A  |
| chr5:154927384-154932250  | 9   | GEMIN5   |
| chr15:64823777-64824354   | 36  | PIF1     |
| chr9:137467316-137484736  | 5   | PNPLA7   |
| chr8:47783741-47785317    | 12  | PRKDC    |
| chr13:24284134-24290884   | 8   | SPATA13  |
| chr1:31337174-31339048    | 178 | ZCCHC17  |
| chr1:224365878-224371423  | 28  | CNIH4    |
| chr10:15135273-15141557   | 9   | NMT2     |
| chr17:2163759-2172859     | 8   | SMG6     |
| chr22:31810520-31815212   | 40  | DEPDC5   |
| chr9:93515669-93516269    | 34  | FAM120A  |
| chr17:46094559-46169605   | 17  | KANSL1   |

|                           |     |         |
|---------------------------|-----|---------|
| chr7:66088806-66089695    | 17  | ASL     |
| chr2:202464808-202467689  | 467 | BMP2R   |
| chr2:25576837-25607321    | 47  | DTNB    |
| chr1:8862886-8864092      | 12  | ENO1    |
| chr6:130858130-130865634  | 7   | EPB41L2 |
| chr16:89791402-89796018   | 7   | FANCA   |
| chr9:20881870-20929596    | 10  | FOCAD   |
| chr2:38880178-38881578    | 11  | MORN2   |
| chr18:63280886-63281214   | 17  | nogene  |
| chr12:42210354-42210680   | 342 | nogene  |
| chr2:119926597-119934958  | 57  | PTPN4   |
| chr17:31887235-31889403   | 7   | UTP6    |
| chr14:69769510-69770042   | 24  | nogene  |
| chr4:4434769-4438509      | 7   | STX18   |
| chr17:43095845-43124115   | 21  | BRCA1   |
| chr6:38277564-38288461    | 10  | BTBD9   |
| chr1:15630324-15643650    | 8   | DDI2    |
| chr20:28590556-28591519   | 7   | FRG1CP  |
| chr1:77949154-77962930    | 12  | FUBP1   |
| chr19:19457006-19465614   | 15  | GATAD2A |
| chr19:45550128-45552285   | 10  | nogene  |
| chr12:8930434-8930927     | 11  | PHC1    |
| chr12:106814695-106825820 | 13  | RIC8B   |
| chr5:39002534-39030572    | 17  | RICTOR  |
| chr14:89984515-89993483   | 14  | TDP1    |
| chr12:123603847-123606159 | 12  | DDX55   |
| chr2:177461892-177468524  | 19  | AGPS    |
| chr22:23273080-23273774   | 26  | BCR     |
| chr3:138542690-138572932  | 5   | CEP70   |
| chr2:241407536-241418109  | 20  | FARP2   |
| chr21:33765874-33767828   | 14  | ITSN1   |
| chr3:183086692-183092545  | 40  | MCCC1   |
| chr1:213077695-213104569  | 5   | RPS6KC1 |
| chr2:179172119-179237433  | 11  | SESTD1  |
| chr1:186318446-186318828  | 18  | TPR     |
| chr11:43379232-43389821   | 21  | TTC17   |
| chr20:49260462-49266266   | 9   | ZNF1    |
| chr21:41237512-41257326   | 52  | BACE2   |
| chr19:36472910-36476616   | 7   | ZNF566  |
| chr16:2319580-2319840     | 31  | ABCA3   |
| chr13:95161188-95188542   | 52  | ABCC4   |
| chr13:95206531-95210781   | 29  | ABCC4   |
| chr3:53874210-53878467    | 7   | ACTR8   |

|                           |     |          |
|---------------------------|-----|----------|
| chr4:22389087-22402799    | 52  | ADGRA3   |
| chr12:110388511-110396452 | 20  | ANAPC7   |
| chr12:110382842-110396452 | 26  | ANAPC7   |
| chr17:4206320-4217118     | 18  | ANKFY1   |
| chr18:9204475-9221999     | 51  | ANKRD12  |
| chr5:112754872-112801383  | 6   | APC      |
| chr2:68490189-68526242    | 99  | APLF     |
| chr21:25897572-25911962   | 42  | APP      |
| chr4:152863605-152888307  | 14  | ARFIP1   |
| chr5:142901934-142913293  | 8   | ARHGAP26 |
| chr8:123325892-123337821  | 7   | ATAD2    |
| chr12:50814009-50814439   | 51  | ATF1     |
| chr2:215325986-215333457  | 6   | ATIC     |
| chr11:108330213-108335961 | 16  | ATM      |
| chr1:93571669-93576129    | 40  | BCAR3    |
| chr16:31111299-31112027   | 6   | BCKDK    |
| chr17:43045661-43063951   | 16  | BRCA1    |
| chrX:80744031-80745729    | 39  | BRWD3    |
| chr19:57961390-57966632   | 7   | C19orf18 |
| chr8:90978578-90985841    | 5   | C8orf88  |
| chr22:24095930-24113748   | 7   | CABIN1   |
| chr11:34086063-34092056   | 10  | CAPRIN1  |
| chr1:112653597-112667145  | 85  | CAPZA1   |
| chr6:89853165-89857199    | 17  | CASP8AP2 |
| chr19:11349653-11350199   | 7   | CCDC159  |
| chr3:191357087-191380932  | 8   | CCDC50   |
| chr10:32685969-32729457   | 11  | CCDC7    |
| chr6:110217701-110219869  | 19  | CDC40    |
| chr2:174875787-174878128  | 54  | CHN1     |
| chr19:1270927-1272051     | 40  | CIRBP    |
| chr7:107527236-107548332  | 25  | COG5     |
| chr16:3850296-3854850     | 10  | CREBBP   |
| chr2:36378356-36396787    | 242 | CRIM1    |
| chr2:36369107-36396787    | 303 | CRIM1    |
| chr5:157294782-157304366  | 8   | CYFIP2   |
| chr8:30177125-30180630    | 9   | DCTN6    |
| chr3:57663635-57672438    | 18  | DENND6A  |
| chr12:32698220-32701562   | 9   | DNM1L    |
| chr2:25235706-25237005    | 11  | DNMT3A   |
| chrX:118542724-118543593  | 7   | DOCK11   |
| chr14:101991526-101995300 | 26  | DYNC1H1  |
| chr11:103303092-103358359 | 85  | DYNC2H1  |
| chr11:103253284-103307831 | 7   | DYNC2H1  |

|                           |    |          |
|---------------------------|----|----------|
| chr16:22256747-22258695   | 9  | EEF2K    |
| chr9:95997245-96004701    | 7  | ERCC6L2  |
| chr1:44247938-44352925    | 8  | ERI3     |
| chr5:138006989-138011149  | 11 | FAM13B   |
| chr4:151566137-151588926  | 5  | FAM160A1 |
| chr7:102772408-102787469  | 24 | FAM185A  |
| chr10:124696157-124706887 | 33 | FAM53B   |
| chr5:108798123-108799985  | 11 | FER      |
| chr20:6094938-6097631     | 9  | FERMT1   |
| chrX:154354824-154357623  | 9  | FLNA     |
| chr9:105506398-105539351  | 11 | FSD1L    |
| chrX:74274341-74286170    | 5  | FTX      |
| chrX:74274341-74281848    | 8  | FTX      |
| chr3:142198801-142215692  | 9  | GK5      |
| chr7:42148225-42172686    | 25 | GLI3     |
| chr3:179413411-179426242  | 20 | GNB4     |
| chr3:37294978-37296219    | 6  | GOLGA4   |
| chr4:70831538-70833273    | 17 | GRSF1    |
| chr22:23709129-23709867   | 10 | GUSBP11  |
| chr9:19076601-19096769    | 32 | HAUS6    |
| chr12:112229697-112231715 | 29 | HECTD4   |
| chr10:67966682-68073686   | 11 | HERC4    |
| chr2:190244886-190261234  | 14 | HIBCH    |
| chr5:43294690-43298975    | 5  | HMGCS1   |
| chr1:20757165-20780540    | 45 | HP1BP3   |
| chr2:197503038-197503330  | 35 | HSPE1    |
| chr8:42290155-42293568    | 10 | IKBKB    |
| chr17:61911519-61925099   | 16 | INTS2    |
| chr17:46082440-46162525   | 18 | KANSL1   |
| chr13:30227411-30231472   | 78 | KATNAL1  |
| chr11:67231565-67231960   | 6  | KDM2A    |
| chr18:63355203-63362868   | 7  | KDSR     |
| chr16:29799627-29800048   | 32 | KIF22    |
| chr7:152249875-152250966  | 7  | KMT2C    |
| chr7:105062163-105066807  | 33 | KMT2E    |
| chr6:108319616-108347039  | 7  | LACE1    |
| chr5:146168127-146172774  | 12 | LARS     |
| chr17:38878085-38898519   | 7  | LASP1    |
| chr2:30552492-30568176    | 61 | LCLAT1   |
| chr9:110972072-111036201  | 26 | LPAR1    |
| chr16:192926-199238       | 9  | LUC7L    |
| chr15:67563282-67600749   | 8  | MAP2K5   |
| chr22:21769194-21805945   | 15 | MAPK1    |

|                           |     |           |
|---------------------------|-----|-----------|
| chr6:36072872-36080086    | 31  | MAPK14    |
| chr1:156475107-156477202  | 33  | MEF2D     |
| chr17:2438108-2467876     | 8   | METTTL6   |
| chr17:43808955-43811205   | 20  | MPP3      |
| chr11:66435972-66438259   | 9   | MRPL11    |
| chr5:154950820-154967237  | 238 | MRPL22    |
| chr21:25592811-25601467   | 8   | MRPL39    |
| chr13:40749137-40759106   | 9   | MRPS31    |
| chr3:9689963-9702064      | 32  | MTMR14    |
| chr19:17197791-17198308   | 6   | MYO9B     |
| chr2:15424314-15511350    | 6   | NBAS      |
| chr2:105816429-105855289  | 8   | NCK2      |
| chr12:124419956-124449867 | 19  | NCOR2     |
| chr20:36687417-36688784   | 16  | NDRG3     |
| chr9:124312508-124327445  | 8   | NEK6      |
| chr17:31325819-31326252   | 12  | NF1       |
| chr9:33311105-33319127    | 13  | NFX1      |
| chr1:236024069-236038253  | 31  | NID1      |
| chr5:43700118-43704400    | 15  | NNT       |
| chr8:128009567-128010444  | 8   | nogene    |
| chr3:183015418-183022557  | 5   | nogene    |
| chr3:61622462-61623140    | 8   | nogene    |
| chr11:87355505-87372868   | 7   | nogene    |
| chr2:241322542-241323215  | 7   | nogene    |
| chrX:63314996-63345571    | 12  | nogene    |
| chr12:122877801-122879505 | 10  | nogene    |
| chr11:3395712-3397406     | 9   | nogene    |
| chr5:66191155-66203030    | 11  | nogene    |
| chr6:52429968-52430374    | 19  | nogene    |
| chr21:43729851-43730220   | 17  | nogene    |
| chr9:88418849-88462631    | 5   | nogene    |
| chr19:54204328-54205846   | 8   | nogene    |
| chr4:128017357-128021238  | 9   | nogene    |
| chr2:25709302-25722165    | 5   | nogene    |
| chr9:97139852-97148100    | 55  | nogene    |
| chr15:96269847-96271798   | 5   | NR2F2-AS1 |
| chr1:229463542-229465519  | 16  | NUP133    |
| chr13:25307805-25325068   | 11  | NUPL1     |
| chr5:14673641-14681607    | 168 | OTULIN    |
| chr3:8767265-8768591      | 11  | OXTR      |
| chr7:140046883-140058034  | 49  | PARP12    |
| chr11:34931403-34978182   | 16  | PDHX      |
| chr11:34947505-34978182   | 24  | PDHX      |

|                           |      |          |
|---------------------------|------|----------|
| chr7:149014903-149019197  | 9    | PDIA4    |
| chr13:32732100-32735330   | 55   | PDS5B    |
| chr15:77284957-77286504   | 16   | PEAK1    |
| chr8:132777795-132804740  | 8    | PHF20L1  |
| chrX:54022258-54022843    | 6    | PHF8     |
| chr11:85981744-85996929   | 77   | PICALM   |
| chr12:106405856-106410960 | 5    | POLR3B   |
| chr20:18480037-18481810   | 8    | POLR3F   |
| chr9:131436619-131439061  | 99   | PRRC2B   |
| chr2:53874338-53885775    | 36   | PSME4    |
| chr9:112275843-112297916  | 69   | PTBP3    |
| chr1:31915894-31919658    | 1204 | PTP4A2   |
| chr4:86672364-86693674    | 25   | PTPN13   |
| chr20:2947981-2965202     | 145  | PTPRA    |
| chr7:66783674-66799414    | 53   | RABGEF1  |
| chr7:6387211-6400188      | 7    | RAC1     |
| chr14:67823541-67825577   | 14   | RAD51B   |
| chr22:41245114-41246672   | 7    | RANGAP1  |
| chr17:2991296-3008145     | 9    | RAP1GAP2 |
| chr3:141509567-141559995  | 6    | RASA2    |
| chr12:64684786-64694894   | 17   | RASSF3   |
| chr14:73077368-73083551   | 14   | RBM25    |
| chr5:146218984-146237432  | 6    | RBM27    |
| chr7:155665174-155680908  | 167  | RBM33    |
| chr7:74239937-74246763    | 12   | RFC2     |
| chr9:5656582-5720750      | 5    | RIC1     |
| chr5:38971876-38982036    | 7    | RICTOR   |
| chr12:120557281-120560886 | 29   | RNF10    |
| chr18:32042178-32045732   | 5    | RNF125   |
| chr2:210015972-210021064  | 46   | RPE      |
| chr16:53686432-53692364   | 6    | RPGRIP1L |
| chr14:90978305-91001159   | 42   | RPS6KA5  |
| chr7:77749423-77750064    | 9    | RSBN1L   |
| chr7:77765494-77778446    | 15   | RSBN1L   |
| chr3:134155135-134195182  | 8    | RYK      |
| chr2:199380363-199433514  | 41   | SATB2    |
| chr7:66993216-66994282    | 38   | SBDS     |
| chr4:128992166-128999794  | 8    | SCLT1    |
| chr12:51684173-51689096   | 26   | SCN8A    |
| chr5:254392-256455        | 8    | SDHA     |
| chr20:18524934-18530803   | 5    | SEC23B   |
| chr4:82871943-82875822    | 230  | SEC31A   |
| chr7:85055716-85068284    | 79   | SEMA3D   |

|                           |     |          |
|---------------------------|-----|----------|
| chr3:72812670-72817384    | 12  | SHQ1     |
| chr8:103355210-103407784  | 7   | SLC25A32 |
| chr12:104927972-104931791 | 33  | SLC41A2  |
| chrX:129515686-129518447  | 12  | SMARCA1  |
| chr1:151658234-151662270  | 12  | SNX27    |
| chr3:113488944-113506605  | 275 | SPICE1   |
| chr12:64091275-64115893   | 32  | SRGAP1   |
| chr16:2757471-2757945     | 13  | SRRM2    |
| chr1:112576985-112582472  | 7   | ST7L     |
| chr8:73673106-73739868    | 396 | STAU2    |
| chr20:44975323-44987296   | 16  | STK4     |
| chr11:68166981-68190152   | 26  | SUV420H1 |
| chr11:9713465-9732710     | 30  | SWAP70   |
| chr17:37440504-37444768   | 26  | TADA2A   |
| chr8:119791323-119802025  | 10  | TAF2     |
| chr12:64485454-64490119   | 5   | TBK1     |
| chr6:84738496-84748087    | 24  | TBX18    |
| chr9:100303631-100310379  | 52  | TEX10    |
| chr1:246544520-246551302  | 7   | TFB2M    |
| chr3:142054114-142101841  | 49  | TFDP2    |
| chr13:52397231-52398194   | 19  | THSD1    |
| chr3:9383198-9384825      | 30  | THUMPD3  |
| chr3:156677656-156678614  | 17  | TIPARP   |
| chr6:10749201-10755232    | 30  | TMEM14B  |
| chr7:130173631-130175609  | 7   | TMEM209  |
| chr9:109073355-109108570  | 17  | TMEM245  |
| chr1:25340473-25356853    | 14  | TMEM50A  |
| chr15:42233212-42268032   | 8   | TMEM87A  |
| chr12:82857009-82857580   | 185 | TMTC2    |
| chr5:72887069-72889957    | 37  | TNPO1    |
| chr7:5345561-5359569      | 5   | TNRC18   |
| chr22:40273424-40280143   | 10  | TNRC6B   |
| chr7:23506137-23521840    | 8   | TRA2A    |
| chr15:50574636-50575789   | 8   | TRPM7    |
| chr22:28629551-28656539   | 7   | TTC28    |
| chr1:162576776-162597858  | 57  | UAP1     |
| chr9:33953284-33973237    | 136 | UBAP2    |
| chr15:43043214-43056442   | 6   | UBR1     |
| chr6:42603587-42617338    | 6   | UBR2     |
| chr1:62439798-62442299    | 12  | USP1     |
| chr3:179764001-179765848  | 86  | USP13    |
| chr2:61256383-61266167    | 9   | USP34    |
| chr6:144537581-144557311  | 12  | UTRN     |

|                           |     |           |
|---------------------------|-----|-----------|
| chr8:99641810-99661491    | 16  | VPS13B    |
| chr8:99096311-99121445    | 47  | VPS13B    |
| chr15:61929500-61931259   | 13  | VPS13C    |
| chr10:28589735-28590832   | 7   | WAC       |
| chr5:77449759-77489572    | 27  | WDR41     |
| chr1:108982608-108986680  | 21  | WDR47     |
| chr16:28175897-28181031   | 11  | XPO6      |
| chr20:44901530-44906096   | 7   | YWHAB     |
| chr14:73893796-73904110   | 7   | ZNF410    |
| chr19:9614020-9618179     | 12  | ZNF561    |
| chr17:39908957-39909924   | 8   | GSDMB     |
| chr10:31831738-31852597   | 13  | ARHGAP12  |
| chr4:56011411-56011985    | 57  | CEP135    |
| chr19:1271328-1272051     | 556 | CIRBP     |
| chr7:66130126-66134374    | 11  | CRCP      |
| chr11:65266581-65268729   | 32  | POLA2     |
| chr12:27650009-27656730   | 21  | PPFIBP1   |
| chr12:56670274-56673065   | 106 | PTGES3    |
| chr19:49854969-49858114   | 6   | PTOV1     |
| chr3:50113382-50114251    | 79  | RBM5      |
| chr1:179900125-179908673  | 17  | TOR1AIP1  |
| chr8:23027132-23029721    | 7   | TNFRSF10B |
| chr6:157110471-157148951  | 9   | ARID1B    |
| chr17:61743012-61793729   | 10  | BRIP1     |
| chr5:134781132-134785586  | 15  | DDX46     |
| chr8:108214606-108217460  | 10  | EIF3E     |
| chr6:136388392-136389517  | 27  | MAP7      |
| chr20:44918905-44921731   | 5   | PABPC1L   |
| chr15:90976675-90981981   | 10  | PRC1      |
| chr4:17501718-17504475    | 10  | QDPR      |
| chr18:70092109-70092804   | 5   | RTTN      |
| chr11:107803000-107811794 | 12  | SLC35F2   |
| chr8:102257631-102267007  | 7   | UBR5      |
| chr2:202882710-202883741  | 17  | WDR12     |
| chr9:85677435-85712566    | 65  | AGTPBP1   |
| chr11:78106806-78121174   | 11  | ALG8      |
| chr2:111847137-111850910  | 36  | ANAPC1    |
| chr15:32633932-32636408   | 20  | ARHGAP11A |
| chr4:55489373-55510065    | 11  | CLOCK     |
| chr5:149505446-149513209  | 56  | CSNK1A1   |
| chr4:182877510-182915575  | 92  | DCTD      |
| chr4:24570653-24570847    | 5   | DHX15     |
| chr19:10162666-10166685   | 7   | DNMT1     |



|                           |     |          |
|---------------------------|-----|----------|
| chr20:18593730-18596241   | 24  | DTD1     |
| chr15:74640465-74656068   | 8   | EDC3     |
| chr2:46346872-46361090    | 10  | EPAS1    |
| chr11:128768117-128782023 | 18  | FLI1     |
| chr10:14854124-14855943   | 11  | HSPA14   |
| chr13:30255446-30257867   | 8   | KATNAL1  |
| chr5:146168127-146171990  | 29  | LARS     |
| chr1:3781150-3781601      | 12  | LRRC47   |
| chr8:66601697-66602523    | 134 | MYBL1    |
| chr16:3476221-3479600     | 33  | NAA60    |
| chr9:97647491-97654944    | 14  | NCBP1    |
| chr17:16034764-16039654   | 18  | NCOR1    |
| chr12:102257214-102282298 | 47  | nogene   |
| chr3:136709391-136715592  | 11  | nogene   |
| chrX:71297938-71298468    | 8   | NONO     |
| chr3:183862752-183868060  | 30  | PARL     |
| chr17:67532801-67578257   | 8   | PITPNC1  |
| chr1:88760221-88786213    | 7   | PKN2     |
| chr5:127526617-127539143  | 64  | PRRC1    |
| chr1:151024610-151027327  | 37  | PRUNE    |
| chr9:122855183-122855878  | 13  | RC3H2    |
| chr1:150440922-150444377  | 5   | RPRD2    |
| chr3:9453738-9464672      | 45  | SETD5    |
| chr3:27379248-27391808    | 16  | SLC4A7   |
| chr2:102657563-102665350  | 11  | SLC9A2   |
| chr3:47675474-47686170    | 34  | SMARCC1  |
| chr7:17850346-17875790    | 23  | SNX13    |
| chr1:48355669-48403882    | 13  | SPATA6   |
| chr1:47287550-47301748    | 16  | STIL     |
| chr3:133608534-133612552  | 8   | TOPBP1   |
| chr6:43555835-43568737    | 11  | XPO5     |
| chr6:170546102-170549113  | 16  | PSMB1    |
| chr10:94511582-94522453   | 30  | TBC1D12  |
| chr2:96797011-96817502    | 7   | CNNM4    |
| chr1:222686929-222703217  | 68  | AIDA     |
| chr11:83273646-83278829   | 52  | CCDC90B  |
| chr3:52374187-52374885    | 6   | nogene   |
| chr10:75150513-75151106   | 104 | SAMD8    |
| chr15:56689040-56693215   | 29  | ZNF280D  |
| chr12:47679492-47690639   | 7   | RPAP3    |
| chr12:110030644-110036328 | 9   | ANKRD13A |
| chr3:43598531-43600581    | 10  | ANO10    |
| chrX:23856301-23868688    | 7   | APOO     |

|                           |     |           |
|---------------------------|-----|-----------|
| chr19:12745376-12745759   | 7   | ASNA1     |
| chr19:32915336-32926984   | 14  | CEP89     |
| chr1:173838189-173845291  | 18  | DARS2     |
| chr15:66294987-66314117   | 6   | DIS3L     |
| chr8:131940498-131970643  | 50  | EFR3A     |
| chr4:3103823-3121432      | 12  | HTT       |
| chr5:126878184-126918227  | 8   | 3-Mar     |
| chr14:64417887-64424931   | 29  | MTHFD1    |
| chr12:50004234-50016719   | 8   | RACGAP1   |
| chr2:199323802-199349173  | 6   | SATB2     |
| chr12:64080285-64115893   | 8   | SRGAP1    |
| chr9:79627373-79654075    | 57  | TLE4      |
| chr7:157216866-157231327  | 26  | UBE3C     |
| chr10:1103534-1105267     | 9   | WDR37     |
| chr11:117159933-117161261 | 49  | PAFAH1B2  |
| chr16:2056195-2058873     | 54  | TSC2      |
| chr8:144748682-144749080  | 8   | nogene    |
| chr3:104817472-104818695  | 8   | nogene    |
| chr16:70267658-70268379   | 8   | AARS      |
| chr11:108307896-108317521 | 8   | ATM       |
| chr11:108227594-108235834 | 151 | ATM       |
| chr1:235454155-235484515  | 13  | B3GALNT2  |
| chr7:16682779-16689906    | 11  | BZW2      |
| chr5:179841906-179844227  | 26  | C5orf45   |
| chr10:118691264-118695230 | 11  | CACUL1    |
| chr11:107390073-107392895 | 191 | CWF19L2   |
| chr7:80199224-80212869    | 9   | GNAI1     |
| chr16:74348866-74360891   | 6   | LOC283922 |
| chr13:25265818-25267941   | 29  | MTMR6     |
| chr12:76067370-76074239   | 94  | NAP1L1    |
| chr1:198232552-198297240  | 6   | NEK7      |
| chr18:42038780-42049605   | 12  | PIK3C3    |
| chr19:43652224-43655573   | 8   | PLAUR     |
| chr1:202422619-202449171  | 8   | PPP1R12B  |
| chr14:67823541-67835196   | 151 | RAD51B    |
| chr1:44411980-44412722    | 259 | RNF220    |
| chr3:47701277-47706530    | 7   | SMARCC1   |
| chr6:85543604-85558060    | 10  | SNX14     |
| chr1:230933778-230961303  | 6   | TTC13     |
| chr15:42988818-43025429   | 7   | UBR1      |
| chr5:178860127-178860974  | 15  | ZNF354B   |
| chr6:28271853-28272787    | 20  | ZSCAN26   |
| chr1:30974650-30981405    | 11  | PUM1      |

|                           |     |          |
|---------------------------|-----|----------|
| chr1:241881915-241885507  | 19  | EXO1     |
| chr14:54479785-54483767   | 5   | GMFB     |
| chr13:30227411-30283791   | 673 | KATNAL1  |
| chr16:56470486-56470791   | 5   | OGFOD1   |
| chr11:66363137-66368671   | 5   | SLC29A2  |
| chr1:151638887-151668635  | 89  | SNX27    |
| chr19:2936523-2939407     | 30  | ZNF77    |
| chr17:4085669-4086655     | 85  | ZZEF1    |
| chr12:109222506-109223904 | 7   | ACACB    |
| chr5:180261683-180269409  | 18  | MAPK9    |
| chr18:12356693-12360051   | 62  | AFG3L2   |
| chr5:343892-376716        | 7   | AHRR     |
| chr10:27907662-27944962   | 21  | ARMC4    |
| chr7:18722951-18793452    | 11  | HDAC9    |
| chr19:18134578-18134982   | 16  | MAST3    |
| chr5:150539227-150540264  | 37  | NDST1    |
| chr3:50347575-50350022    | 12  | NPRL2    |
| chr12:45931505-45951727   | 10  | SCAF11   |
| chr1:10467189-10469338    | 68  | DFFA     |
| chrX:72488932-72495268    | 56  | HDAC8    |
| chr7:23360585-23361741    | 9   | IGF2BP3  |
| chr7:128591849-128615970  | 9   | nogene   |
| chr4:86772777-86775652    | 28  | PTPN13   |
| chr3:12496517-12505231    | 25  | TSEN2    |
| chr9:20907149-20929596    | 40  | FOCAD    |
| chr1:161851721-161912380  | 9   | ATF6     |
| chr10:12215739-12238485   | 179 | CDC123   |
| chr3:33072543-33077237    | 5   | GLB1     |
| chr7:36335045-36336297    | 10  | KIAA0895 |
| chr12:62549667-62553174   | 11  | MON2     |
| chr8:71973537-72076627    | 8   | nogene   |
| chr5:37291812-37299568    | 5   | NUP155   |
| chr10:6213622-6219693     | 23  | PFKFB3   |
| chr5:145764930-145776430  | 12  | PRELID2  |
| chr8:47933019-47936517    | 10  | PRKDC    |
| chr17:59910561-59926582   | 7   | RPS6KB1  |
| chr4:185361923-185362711  | 24  | SNX25    |
| chr7:23505745-23521840    | 9   | TRA2A    |
| chr1:162566011-162588833  | 11  | UAP1     |
| chr1:151178000-151185950  | 8   | VPS72    |
| chr14:54995602-55000992   | 11  | WDHD1    |
| chr5:133006758-133007889  | 10  | ZCCHC10  |
| chr10:79310923-79311184   | 9   | ZMIZ1    |

|                           |    |         |
|---------------------------|----|---------|
| chr10:26765217-26770345   | 60 | ABI1    |
| chr3:195365481-195392147  | 7  | ACAP2   |
| chr2:157760879-157774187  | 7  | ACVR1   |
| chr9:85585462-85596449    | 19 | AGTPBP1 |
| chr1:246860898-246862153  | 14 | AHCTF1  |
| chr2:9376907-9380808      | 13 | ASAP2   |
| chr1:155378280-155380116  | 8  | ASH1L   |
| chr17:30858160-30869646   | 9  | ATAD5   |
| chr3:182836034-182848557  | 24 | ATP11B  |
| chr12:89655678-89656107   | 20 | ATP2B1  |
| chr3:142465096-142468068  | 36 | ATR     |
| chr16:304303-347106       | 58 | AXIN1   |
| chr18:31638643-31658089   | 11 | B4GALT6 |
| chr2:28237201-28241393    | 9  | BRE     |
| chr7:16685904-16689906    | 6  | BZW2    |
| chr22:24035443-24043084   | 41 | CABIN1  |
| chr18:24143090-24143413   | 15 | CABYR   |
| chr12:67292621-67299095   | 13 | CAND1   |
| chr2:207724799-207751119  | 8  | CCNYL1  |
| chr12:7432657-7433694     | 19 | CD163L1 |
| chr22:17503081-17505016   | 13 | CECR2   |
| chr16:81011929-81014181   | 11 | CENPN   |
| chr17:66062962-66096632   | 9  | CEP112  |
| chr1:179990506-179992221  | 7  | CEP350  |
| chr1:150966755-150969091  | 5  | CERS2   |
| chr21:36387597-36399605   | 8  | CHAF1B  |
| chr3:33619602-33663515    | 15 | CLASP2  |
| chr16:10969160-10982991   | 69 | CLEC16A |
| chr12:122360958-122364107 | 9  | CLIP1   |
| chr7:107362032-107372760  | 61 | COG5    |
| chr12:38670728-38702921   | 10 | CPNE8   |
| chr3:33120343-33134265    | 12 | CRTAP   |
| chr4:1231634-1241519      | 9  | CTBP1   |
| chr2:227893794-227907252  | 63 | DAW1    |
| chr22:38498084-38498573   | 9  | DDX17   |
| chr5:134816429-134819004  | 11 | DDX46   |
| chr1:197595207-197617759  | 39 | DENND1B |
| chr12:50724774-50728678   | 5  | DIP2B   |
| chr10:68465666-68470163   | 48 | DNA2    |
| chr5:118928536-118946328  | 9  | DTWD2   |
| chr1:20840855-20865262    | 24 | EIF4G3  |
| chr3:55888388-55950560    | 6  | ERC2    |
| chr11:126234994-126241044 | 13 | FAM118B |

|                           |    |          |
|---------------------------|----|----------|
| chr6:70426569-70452571    | 23 | FAM135A  |
| chr18:13681604-13687882   | 7  | FAM210A  |
| chr6:145804371-145806421  | 6  | FBXO30   |
| chr16:53933984-53937833   | 13 | FTO      |
| chr1:151088189-151107222  | 15 | GABPB2   |
| chr1:93894613-93904588    | 49 | GCLM     |
| chr12:109980951-109991760 | 8  | GIT2     |
| chr8:41609415-41612273    | 16 | GPAT4    |
| chr2:144208602-144235737  | 38 | GTDC1    |
| chr10:999002-1007128      | 7  | GTPBP4   |
| chr11:119126934-119127125 | 30 | HINFP    |
| chr1:20757165-20776750    | 11 | HP1BP3   |
| chr6:160009009-160010785  | 5  | IGF2R    |
| chr1:153752278-153757763  | 6  | INTS3    |
| chr13:97992891-98000645   | 16 | IPO5     |
| chr12:30665219-30669282   | 16 | IPO8     |
| chr15:90486029-90487582   | 8  | IQGAP1   |
| chr19:5016256-5047669     | 10 | KDM4B    |
| chr9:7103684-7128236      | 7  | KDM4C    |
| chr4:122272159-122289192  | 11 | KIAA1109 |
| chr12:122530021-122534784 | 8  | KNTC1    |
| chr5:177334283-177338605  | 9  | LMAN2    |
| chr15:70973248-70984257   | 10 | LRRC49   |
| chr8:55966714-55999549    | 5  | LYN      |
| chr3:47918718-47921878    | 17 | MAP4     |
| chr18:54159764-54166166   | 36 | MBD2     |
| chr18:21773623-21804014   | 8  | MIB1     |
| chr10:72407928-72508269   | 11 | MICU1    |
| chr17:42568469-42570183   | 8  | MLX      |
| chr6:44114076-44116629    | 63 | MRPL14   |
| chr2:15415545-15478289    | 27 | NBAS     |
| chrX:135034668-135038178  | 15 | nogene   |
| chr11:29282461-29285063   | 12 | nogene   |
| chr2:183182556-183188763  | 11 | nogene   |
| chr20:49053082-49053453   | 10 | nogene   |
| chr22:38355859-38356295   | 7  | nogene   |
| chr1:8865314-8866394      | 8  | nogene   |
| chr22:28514756-28528728   | 11 | nogene   |
| chr3:112153472-112154325  | 9  | nogene   |
| chr5:177191883-177204292  | 90 | NSD1     |
| chr5:37342548-37358151    | 12 | NUP155   |
| chr11:3731390-3731578     | 47 | NUP98    |
| chr20:62281789-62291793   | 15 | OSBPL2   |

|                           |     |           |
|---------------------------|-----|-----------|
| chr9:75127568-75140932    | 7   | OSTF1     |
| chr14:70968197-70978648   | 15  | PCNX      |
| chr1:233160282-233208689  | 58  | PCNXL2    |
| chr15:43763076-43765566   | 5   | PDIA3     |
| chr9:41025763-41027114    | 7   | PGM5P2    |
| chr18:62830034-62860601   | 12  | PHLPP1    |
| chr10:122412919-122417968 | 15  | PLEKHA1   |
| chr12:19283279-19287556   | 16  | PLEKHA5   |
| chr2:43712224-43741126    | 5   | PLEKHH2   |
| chr10:77980140-77981559   | 8   | POLR3A    |
| chr2:44201185-44209327    | 23  | PPM1B     |
| chr5:40764513-40771863    | 34  | PRKAA1    |
| chr8:140826978-140864399  | 15  | PTK2      |
| chr19:49844315-49844598   | 14  | PTOV1-AS1 |
| chr1:174250474-174305127  | 9   | RABGAP1L  |
| chr9:107300140-107325004  | 102 | RAD23B    |
| chr7:39686630-39690590    | 27  | RALA      |
| chr3:141509567-141529802  | 25  | RASA2     |
| chr7:5047969-5057779      | 15  | RBAK      |
| chr22:35765422-35778078   | 32  | RBFOX2    |
| chr1:8614560-8624380      | 31  | RERE      |
| chr2:99449335-99451501    | 7   | REV1      |
| chr19:33021570-33026632   | 13  | RHPN2     |
| chr8:86474819-86507112    | 7   | RMDN1     |
| chr18:321111753-32124845  | 213 | RNF138    |
| chr2:11249660-11287736    | 7   | ROCK2     |
| chr17:59935192-59937774   | 8   | RPS6KB1   |
| chr7:29936555-29955360    | 33  | SCRN1     |
| chr4:109481676-109494856  | 18  | SEC24B    |
| chr2:241342991-241346249  | 17  | 2-Sep     |
| chr16:70532478-70539207   | 61  | SF3B3     |
| chr16:70556178-70557029   | 13  | SF3B3     |
| chr15:75400729-75401970   | 13  | SIN3A     |
| chr19:16863796-16865382   | 14  | SIN3B     |
| chr19:10637643-10638315   | 17  | SLC44A2   |
| chr18:21622724-21623939   | 64  | SNRPD1    |
| chr16:69245601-69284244   | 8   | SNTB2     |
| chr11:130903254-130906721 | 12  | SNX19     |
| chr14:50174453-50204409   | 5   | SOS2      |
| chr14:35000935-35008831   | 6   | SRP54     |
| chr19:55341793-55346687   | 11  | SUV420H2  |
| chr17:35820023-35822833   | 31  | TAF15     |
| chr8:119817983-119819506  | 9   | TAF2      |

|                           |     |          |
|---------------------------|-----|----------|
| chr9:79704782-79709699    | 37  | TLE4     |
| chr9:71740062-71740232    | 10  | TMEM2    |
| chr7:130185191-130192823  | 21  | TMEM209  |
| chr1:25340473-25351693    | 74  | TMEM50A  |
| chr7:128982247-128993914  | 13  | TNPO3    |
| chr17:78064721-78067923   | 12  | TNRC6C   |
| chr21:44032090-44037927   | 8   | TRAPPC10 |
| chr17:59061031-59070947   | 7   | TRIM37   |
| chr5:139614585-139623461  | 80  | UBE2D2   |
| chr8:102311298-102361626  | 6   | UBR5     |
| chr1:77739264-77741748    | 11  | USP33    |
| chr3:184936245-184983094  | 32  | VPS8     |
| chr16:22131204-22131729   | 6   | VWA3A    |
| chr6:169572418-169602321  | 6   | WDR27    |
| chr19:12672846-12673316   | 104 | WDR83    |
| chr22:40868998-40882177   | 9   | XPNPEP3  |
| chr16:28132333-28135324   | 10  | XPO6     |
| chr12:64409961-64420521   | 7   | XPOT     |
| chr20:63202286-63203807   | 40  | YTHDF1   |
| chr16:31722625-31723353   | 424 | ZNF720   |
| chr4:145902165-145903215  | 16  | ZNF827   |
| chr12:133047954-133048848 | 27  | ZNF84    |
| chr10:124940373-124943307 | 27  | ZRANB1   |
| chr1:155264467-155270977  | 9   | CLK2     |
| chr17:4547957-4549442     | 16  | MYBBP1A  |
| chr1:244845246-244848856  | 32  | nogene   |
| chr5:134379553-134380010  | 8   | nogene   |
| chrX:121736190-121761171  | 12  | nogene   |
| chr13:110651033-110683134 | 12  | CARS2    |
| chr2:63433744-63571626    | 35  | WDPCP    |
| chr9:129638684-129639201  | 6   | ASB6     |
| chr8:140717597-140743330  | 6   | PTK2     |
| chr1:1815755-1879902      | 8   | GNB1     |
| chr3:195320700-195336976  | 18  | ACAP2    |
| chr16:58585337-58588906   | 19  | CNOT1    |
| chr22:46312140-46326654   | 12  | GTSE1    |
| chr5:132726127-132734478  | 7   | KIF3A    |
| chr3:196805351-196807914  | 32  | PAK2     |
| chr1:77206639-77212347    | 35  | PIGK     |
| chr1:1692448-1739704      | 8   | SLC35E2B |
| chr12:66145840-66153448   | 15  | TMBIM4   |
| chr1:70274719-70315566    | 6   | ANKRD13C |
| chr7:16665436-16697061    | 39  | BZW2     |

|                           |     |           |
|---------------------------|-----|-----------|
| chr6:99558496-99562948    | 15  | CCNC      |
| chr22:17141058-17149745   | 10  | CECR5     |
| chr19:4408902-4410523     | 30  | CHAF1A    |
| chr16:58528474-58534395   | 6   | CNOT1     |
| chr1:92677157-92704744    | 41  | EVI5      |
| chr7:134137022-134174636  | 11  | LRGUK     |
| chr14:71400793-71418196   | 31  | nogene    |
| chr5:93584329-93584824    | 9   | nogene    |
| chrX:65740042-65740250    | 14  | nogene    |
| chr2:202292776-202295837  | 8   | NOP58     |
| chr1:233198938-233252788  | 64  | PCNXL2    |
| chr2:158603069-158642699  | 13  | PKP4      |
| chr2:112547011-112547567  | 8   | POLR1B    |
| chr1:2395783-2402342      | 6   | RER1      |
| chr9:136898712-136909994  | 8   | TRAF2     |
| chr3:141368620-141404031  | 153 | ZBTB38    |
| chr16:84990303-84996007   | 19  | ZDHHC7    |
| chr5:65273339-65291470    | 9   | ADAMTS6   |
| chr22:17900841-17906886   | 12  | MICAL3    |
| chr17:57114458-57116261   | 6   | AKAP1     |
| chr7:111989014-112004131  | 7   | DOCK4     |
| chr11:68347846-68363943   | 10  | LRP5      |
| chr1:198232552-198253180  | 9   | NEK7      |
| chr11:47797778-47801930   | 19  | NUP160    |
| chr12:108818248-108823361 | 8   | SSH1      |
| chr17:35820023-35820437   | 27  | TAF15     |
| chr6:37929958-37930576    | 14  | ZFAND3    |
| chr20:47262287-47347926   | 9   | ZMYND8    |
| chr20:47287228-47294779   | 7   | ZMYND8    |
| chr9:86033281-86052591    | 10  | GOLM1     |
| chrX:63674037-63724711    | 8   | ARHGEF9   |
| chr10:5648969-5653050     | 6   | ASB13     |
| chr12:122785718-122792121 | 28  | CCDC62    |
| chr7:148828739-148847305  | 7   | EZH2      |
| chr1:37568850-37576556    | 5   | GNL2      |
| chr14:92809299-92816421   | 24  | GOLGA5    |
| chr19:17058548-17062779   | 8   | HAUS8     |
| chr7:86925527-86926916    | 5   | KIAA1324L |
| chr1:10371140-10375373    | 7   | KIF1B     |
| chr7:130945719-131053465  | 9   | LINC-PINT |
| chr4:128292933-128303035  | 7   | nogene    |
| chr6:79025518-79026164    | 10  | PHIP      |
| chr22:21939531-21941587   | 14  | PPM1F     |



|                           |     |           |
|---------------------------|-----|-----------|
| chr6:30608778-30609955    | 13  | PPP1R10   |
| chr16:471294-489000       | 13  | RAB11FIP3 |
| chr19:11335446-11335783   | 65  | RAB3D     |
| chr3:141553856-141559995  | 141 | RASA2     |
| chrX:48575167-48577109    | 39  | RBM3      |
| chr2:218580560-218587695  | 7   | RQCD1     |
| chr22:23816769-23825415   | 7   | SMARCB1   |
| chr5:6651841-6662966      | 37  | SRD5A1    |
| chrX:123610917-123614189  | 7   | THOC2     |
| chr15:77046775-77056255   | 12  | TSPAN3    |
| chr15:90999676-90999975   | 19  | VPS33B    |
| chr12:118042840-118043377 | 17  | WSB2      |
| chr17:36952885-36953907   | 125 | AATF      |
| chr1:75745805-75750546    | 46  | ACADM     |
| chr1:147650142-147659775  | 6   | ACP6      |
| chr7:149891190-150295347  | 9   | ACTR3C    |
| chr5:65470777-65473952    | 10  | ADAMTS6   |
| chr1:35901473-35902337    | 23  | AGO1      |
| chrX:130129501-130131799  | 5   | AIFM1     |
| chr15:85655416-85655787   | 8   | AKAP13    |
| chr6:131199460-131219808  | 20  | AKAP7     |
| chr11:111836164-111840809 | 15  | ALG9      |
| chr8:107284681-107303367  | 6   | ANGPT1    |
| chr1:113897839-113901885  | 7   | AP4B1     |
| chr11:108227594-108247127 | 16  | ATM       |
| chr18:79096475-79126375   | 150 | ATP9B     |
| chr6:16585779-16753347    | 13  | ATXN1     |
| chr8:102833055-102843747  | 16  | AZIN1     |
| chr17:60902619-60924500   | 23  | BCAS3     |
| chr2:32439507-32453954    | 17  | BIRC6     |
| chr2:70160624-70181997    | 13  | C2orf42   |
| chr7:82060427-82084900    | 23  | CACNA2D1  |
| chr13:110663450-110705571 | 14  | CARS2     |
| chr9:65690966-65708958    | 12  | CBWD5     |
| chr7:26202970-26208555    | 40  | CBX3      |
| chr10:32543299-32635158   | 11  | CCDC7     |
| chr10:32472480-32544301   | 10  | CCDC7     |
| chr10:35483403-35530243   | 23  | CCNY      |
| chr1:156333546-156335888  | 30  | CCT3      |
| chr3:101731839-101732654  | 23  | CEP97     |
| chr16:69160355-69167185   | 6   | CIRH1A    |
| chr3:33606590-33644903    | 53  | CLASP2    |
| chr1:9743883-9744643      | 11  | CLSTN1    |

|                           |     |              |
|---------------------------|-----|--------------|
| chr19:54142928-54149758   | 6   | CNOT3        |
| chr7:43639448-43648652    | 6   | COA1         |
| chr1:230663140-230664587  | 27  | COG2         |
| chrX:108577951-108578383  | 5   | COL4A5       |
| chr1:160316218-160332557  | 13  | COPA         |
| chr20:49066191-49066510   | 55  | CSE1L        |
| chr15:64203081-64216713   | 98  | CSNK1G1      |
| chr20:488677-489881       | 6   | CSNK2A1      |
| chr1:40995916-40997526    | 6   | CTPS1        |
| chr11:70405264-70422995   | 9   | CTTN         |
| chr11:107308282-107353736 | 26  | CWF19L2      |
| chr4:51863436-51899378    | 45  | DCUN1D4      |
| chr10:21882281-21929141   | 17  | DNAJC1       |
| chr11:103399662-103468705 | 8   | DYNC2H1      |
| chr9:137754170-137762820  | 51  | EHMT1        |
| chr5:66012048-66014725    | 50  | ERBB2IP      |
| chr3:186079816-186081175  | 202 | ETV5         |
| chr5:74796029-74805284    | 27  | FAM169A      |
| chr5:94050730-94057203    | 7   | FAM172A      |
| chr22:45574510-45577108   | 21  | FBLN1        |
| chr9:20758089-20778768    | 7   | FOCAD        |
| chr7:4740837-4742849      | 14  | FOXK1        |
| chr6:108663454-108664889  | 766 | FOXO3        |
| chr6:29623304-29624024    | 13  | GABBR1       |
| chr16:58716013-58716813   | 17  | GOT2         |
| chr5:21491320-21497196    | 19  | GUSBP1       |
| chr8:29045360-29049048    | 9   | HMBBOX1      |
| chr2:38585643-38591648    | 74  | HNRNPLL      |
| chr3:122759223-122777906  | 6   | HSPBAP1      |
| chr16:71894720-71921453   | 14  | IST1         |
| chr20:34424479-34462221   | 6   | ITCH         |
| chr19:17973807-17989843   | 6   | KCNN1        |
| chr6:18159882-18161454    | 9   | KDM1B        |
| chr1:155921374-155921918  | 135 | KIAA0907     |
| chr18:6213148-6264038     | 15  | L3MBTL4      |
| chr7:130967388-131052555  | 8   | LINC-PINT    |
| chr7:156724111-156756465  | 39  | LMBR1        |
| chr15:30745177-30750556   | 7   | LOC100288637 |
| chr16:199061-208188       | 43  | LUC7L        |
| chr18:35070194-35102159   | 24  | MAPRE2       |
| chr14:103405075-103448967 | 8   | MARK3        |
| chr19:12851933-12852395   | 68  | MAST1        |
| chr10:101792838-101810314 | 19  | MGEA5        |

|                           |     |          |
|---------------------------|-----|----------|
| chr7:7594979-7596461      | 11  | MIOS     |
| chr9:126381063-126395697  | 46  | MVB12B   |
| chr2:191329934-191350225  | 6   | MYO1B    |
| chr19:17162349-17163122   | 12  | MYO9B    |
| chr12:76049199-76074239   | 6   | NAP1L1   |
| chr20:34768463-34776448   | 9   | NCOA6    |
| chr2:206149019-206152510  | 33  | NDUFS1   |
| chr6:130287819-130288395  | 12  | nogene   |
| chr1:1786934-1825482      | 11  | nogene   |
| chrX:91414903-91418867    | 39  | nogene   |
| chr5:134799645-134800042  | 12  | nogene   |
| chr15:92910606-92911506   | 7   | nogene   |
| chr12:108813137-108813490 | 15  | nogene   |
| chr4:48833400-48857365    | 12  | OCIAD1   |
| chr1:233236255-233236980  | 8   | PCNXL2   |
| chrX:24494741-24505298    | 18  | PDK3     |
| chr11:601573-603436       | 6   | PHRF1    |
| chr2:131120933-131126786  | 5   | PLEKHB2  |
| chr10:131934457-131947791 | 19  | PPP2R2D  |
| chr3:170270420-170275287  | 6   | PRKCI    |
| chr19:49599271-49601918   | 17  | PRR12    |
| chr9:111574733-111589382  | 10  | PTGR1    |
| chr7:105481051-105508544  | 6   | PUS7     |
| chr3:111144898-111147484  | 37  | PVRL3    |
| chr15:40728710-40731344   | 6   | RAD51    |
| chr20:34072065-34076040   | 10  | RALY     |
| chr6:138907494-138914761  | 6   | REPS1    |
| chr1:8465924-8614686      | 7   | RERE     |
| chr9:5689958-5720750      | 17  | RIC1     |
| chr7:4983670-4989177      | 284 | RNF216P1 |
| chr9:36375933-36376127    | 6   | RNF38    |
| chr6:42880860-42884750    | 23  | RPL7L1   |
| chr6:154773988-154792976  | 12  | SCAF8    |
| chr2:241337381-241348191  | 7   | 2-Sep    |
| chr11:17926737-18008076   | 7   | SERGEF   |
| chr10:110964124-110967278 | 8   | SHOC2    |
| chr21:36709167-36731151   | 15  | SIM2     |
| chr4:42022837-42039053    | 26  | SLC30A9  |
| chr9:96343903-96352109    | 9   | SLC35D2  |
| chr19:11007901-11010531   | 23  | SMARCA4  |
| chr7:127694827-127707647  | 24  | SND1     |
| chr4:185247293-185259064  | 6   | SNX25    |
| chr1:179302676-179337896  | 24  | SOAT1    |

|                           |     |          |
|---------------------------|-----|----------|
| chr1:48395266-48399644    | 10  | SPATA6   |
| chr12:130795994-130808704 | 23  | STX2     |
| chr11:59788872-59795482   | 11  | STX3     |
| chr17:55072899-55081183   | 19  | STXBP4   |
| chr10:102592581-102597293 | 7   | SUFU     |
| chr19:19019108-19031082   | 7   | SUGP2    |
| chr7:27785162-27785489    | 67  | TAX1BP1  |
| chr4:106230362-106236808  | 7   | TBCK     |
| chr2:74073548-74080591    | 41  | TET3     |
| chr2:70988534-70993775    | 21  | TEX261   |
| chr13:113534044-113539507 | 7   | TMCO3    |
| chr12:121743628-121750439 | 7   | TMEM120B |
| chr9:109033306-109038117  | 8   | TMEM245  |
| chr9:105705596-105748190  | 25  | TMEM38B  |
| chr8:132722039-132757294  | 7   | TMEM71   |
| chr18:68697225-68713900   | 8   | TMX3     |
| chr19:55140882-55141920   | 36  | TNNT1    |
| chr17:18285141-18285520   | 31  | TOP3A    |
| chr18:31873429-31901025   | 11  | TRAPPC8  |
| chr22:46337778-46346544   | 17  | TRMU     |
| chr18:24118124-24125550   | 8   | TTC39C   |
| chr2:178535731-178600667  | 14  | TTN-AS1  |
| chr17:59884660-59891041   | 7   | TUBD1    |
| chr1:162576776-162590511  | 18  | UAP1     |
| chr6:42650283-42652645    | 8   | UBR2     |
| chr17:60294682-60301704   | 9   | USP32    |
| chr6:99464603-99468618    | 78  | USP45    |
| chr4:119245336-119273708  | 12  | USP53    |
| chr3:51419733-51420997    | 6   | VPRBP    |
| chr16:74892483-74904100   | 9   | WDR59    |
| chr7:5199575-5203481      | 8   | WIPI2    |
| chr12:57946994-57953689   | 39  | XRCC6BP1 |
| chr11:57692610-57696043   | 10  | ZDHC5    |
| chr1:52233170-52239595    | 8   | ZFYVE9   |
| chr3:125313307-125313656  | 52  | ZNF148   |
| chr7:149153944-149154340  | 147 | ZNF398   |
| chr6:57124733-57142095    | 101 | ZNF451   |
| chr19:53404473-53486758   | 9   | ZNF813   |
| chr17:19958013-19958571   | 29  | AKAP10   |
| chr17:19939712-19947505   | 12  | AKAP10   |
| chr5:126582850-126584012  | 5   | ALDH7A1  |
| chr2:127869453-127874272  | 6   | AMMECR1L |
| chr16:71745143-71750332   | 12  | AP1G1    |

|                           |    |             |
|---------------------------|----|-------------|
| chr1:10440346-10442441    | 62 | APITD1-CORT |
| chr4:36187450-36229645    | 11 | ARAP2       |
| chr11:118581245-118593698 | 5  | ARCN1       |
| chr5:143054438-143134105  | 6  | ARHGAP26    |
| chr10:121870005-121924329 | 39 | ATE1        |
| chr17:18021122-18026416   | 39 | ATPAF2      |
| chr7:32543140-32552295    | 16 | AVL9        |
| chr2:202513718-202519052  | 16 | BMPR2       |
| chr7:140776911-140834703  | 11 | BRAF        |
| chr1:169798856-169804240  | 5  | C1orf112    |
| chr5:37120215-37121784    | 31 | C5orf42     |
| chr12:67307396-67310316   | 10 | CAND1       |
| chr11:34086063-34086413   | 48 | CAPRIN1     |
| chr1:93226332-93232593    | 11 | CCDC18      |
| chr15:59107321-59117368   | 10 | CCNB2       |
| chrX:2615815-2626642      | 5  | CD99P1      |
| chr22:46436173-46439411   | 18 | CELSR1      |
| chr4:184710071-184717196  | 7  | CENPU       |
| chr1:243185778-243225321  | 10 | CEP170      |
| chr18:12999420-13013025   | 14 | CEP192      |
| chr3:113399905-113407041  | 15 | CFAP44      |
| chr2:201129728-201136107  | 16 | CFLAR       |
| chr7:132975168-133024627  | 48 | CHCHD3      |
| chr22:28695709-28699937   | 5  | CHEK2       |
| chr12:119822819-119834228 | 14 | CIT         |
| chr12:122332986-122334705 | 6  | CLIP1       |
| chr1:155264220-155270977  | 5  | CLK2        |
| chr12:70319297-70346324   | 6  | CNOT2       |
| chr5:116291516-116303683  | 36 | COMMD10     |
| chr4:83056925-83063246    | 11 | COPS4       |
| chr14:92142163-92143294   | 6  | CPSF2       |
| chr2:36378356-36464655    | 8  | CRIM1       |
| chr5:138886211-138917898  | 6  | CTNNA1      |
| chr4:150193137-150203889  | 12 | DCLK2       |
| chr2:233363076-233390483  | 76 | DGKD        |
| chr19:47355038-47355350   | 32 | DHX34       |
| chr12:50671185-50683248   | 9  | DIP2B       |
| chr12:50671185-50674629   | 8  | DIP2B       |
| chr3:197051576-197066754  | 7  | DLG1        |
| chr10:77853353-77854370   | 73 | DLG5        |
| chr15:51507133-51517167   | 8  | DMXL2       |
| chr19:10163325-10173905   | 13 | DNMT1       |
| chr12:63644402-63661481   | 18 | DPY19L2     |

|                           |      |              |
|---------------------------|------|--------------|
| chr12:101908185-101920201 | 6    | DRAM1        |
| chr7:107564587-107576592  | 11   | DUS4L        |
| chr11:103311877-103323990 | 72   | DYNC2H1      |
| chr1:21221746-21228041    | 17   | ECE1         |
| chr1:231364326-231374099  | 12   | EGLN1        |
| chr10:119069445-119071085 | 8    | EIF3A        |
| chr17:39709812-39710481   | 6    | ERBB2        |
| chr5:65975986-65994864    | 5    | ERBB2IP      |
| chr1:27978373-28004419    | 8    | EYA3         |
| chr5:154033790-154034946  | 7    | FAM114A2     |
| chr7:22960255-22978448    | 11   | FAM126A      |
| chr2:222613810-222624479  | 17   | FARSB        |
| chr5:171876284-171878129  | 5    | FBXW11       |
| chr4:53414614-53428183    | 537  | FIP1L1       |
| chr1:154987465-154990528  | 5    | FLAD1        |
| chr9:20715321-20770238    | 89   | FOCAD        |
| chr5:151794158-151799313  | 31   | G3BP1        |
| chr9:83799184-83806560    | 7    | GKAP1        |
| chr12:132795851-132822311 | 11   | GOLGA3       |
| chr14:76166662-76178042   | 86   | GPATCH2L     |
| chr12:12908242-12909171   | 25   | GPRC5A       |
| chr15:28292887-28321464   | 9    | HERC2        |
| chr10:68014025-68067217   | 7    | HERC4        |
| chr21:36896859-36897131   | 19   | HLCS         |
| chr9:112403994-112409021  | 23   | HSDL2        |
| chr4:3086938-3103883      | 7    | HTT          |
| chr11:62128150-62130590   | 10   | INCENP       |
| chr8:94842346-94856978    | 7    | INTS8        |
| chr12:26621122-26632059   | 23   | ITPR2        |
| chr4:128831732-128862225  | 7    | JADE1        |
| chr17:46066536-46082542   | 36   | KANSL1       |
| chr3:20071363-20072459    | 15   | KAT2B        |
| chr1:23044426-23059167    | 18   | KDM1A        |
| chr1:32037834-32038619    | 7    | KHDRBS1      |
| chr2:61103852-61106662    | 49   | KIAA1841     |
| chr7:152309965-152330739  | 15   | KMT2C        |
| chr12:122557383-122557689 | 8    | KNTC1        |
| chr22:33761370-33856802   | 84   | LARGE        |
| chr7:22571774-22575762    | 11   | LOC100506178 |
| chr9:110972072-110973558  | 2714 | LPAR1        |
| chr11:68357649-68365702   | 61   | LRP5         |
| chr12:12165078-12187119   | 10   | LRP6         |
| chr14:74514605-74516941   | 9    | LTBP2        |

|                           |     |          |
|---------------------------|-----|----------|
| chr6:90536336-90571807    | 7   | MAP3K7   |
| chr12:111867571-111871180 | 12  | MAPKAPK5 |
| chr10:119847612-119859884 | 14  | MCMBP    |
| chr17:76738281-76742048   | 6   | MFSD11   |
| chr3:127694974-127695190  | 45  | MGLL     |
| chrX:154789953-154792285  | 148 | MPP1     |
| chr2:55246336-55249534    | 10  | MTIF2    |
| chr6:73480674-73482244    | 116 | MTO1     |
| chr4:139376364-139386230  | 9   | NAA15    |
| chr18:10539761-10540399   | 8   | NAPG     |
| chr8:89970363-89978323    | 41  | NBN      |
| chr14:75109684-75114313   | 7   | NEK9     |
| chr19:1602756-1603327     | 13  | nogene   |
| chr14:34969169-34972064   | 64  | nogene   |
| chr5:134942480-134960698  | 17  | nogene   |
| chr2:61197271-61197791    | 10  | nogene   |
| chr16:81516411-81517984   | 6   | nogene   |
| chr2:177246891-177247408  | 11  | nogene   |
| chr11:69371402-69373513   | 13  | nogene   |
| chr16:67939885-67940831   | 13  | nogene   |
| chr22:17928400-17928882   | 7   | nogene   |
| chr1:58713055-58723169    | 5   | nogene   |
| chr7:157391091-157391847  | 5   | nogene   |
| chr8:53984804-53985133    | 19  | nogene   |
| chr9:91883257-91886770    | 72  | nogene   |
| chr6:108567171-108569742  | 12  | nogene   |
| chr9:22767174-22768403    | 6   | nogene   |
| chr15:63567616-63568079   | 14  | nogene   |
| chr8:125102050-125182256  | 20  | NSMCE2   |
| chr5:37301436-37303414    | 59  | NUP155   |
| chr4:56451871-56453761    | 23  | PAICS    |
| chr6:10702368-10704844    | 10  | PAK1IP1  |
| chr6:10702368-10702639    | 99  | PAK1IP1  |
| chr14:24096891-24102890   | 6   | PCK2     |
| chr3:123106748-123124343  | 7   | PDIA5    |
| chr16:47463898-47499894   | 11  | PHKB     |
| chr16:47497398-47596531   | 54  | PHKB     |
| chr16:71655239-71656681   | 7   | PHLPP2   |
| chr12:19253939-19257537   | 6   | PLEKHA5  |
| chr11:68567013-68583129   | 19  | PPP6R3   |
| chr11:68558565-68576043   | 8   | PPP6R3   |
| chr17:66495571-66496283   | 17  | PRKCA    |
| chr1:2169517-2175313      | 24  | PRKCZ    |

|                           |     |           |
|---------------------------|-----|-----------|
| chr2:53892807-53893799    | 39  | PSME4     |
| chr2:86121478-86125880    | 10  | PTCD3     |
| chr8:140818276-140879637  | 233 | PTK2      |
| chr8:140739017-140752316  | 616 | PTK2      |
| chr18:12814202-12859254   | 30  | PTPN2     |
| chr1:30992389-31007102    | 267 | PUM1      |
| chr10:118009081-118040565 | 14  | RAB11FIP2 |
| chr18:23001585-23006432   | 28  | RBBP8     |
| chr14:22906194-22911403   | 388 | RBM23     |
| chr6:111472012-111474479  | 9   | REV3L     |
| chr4:39326562-39327756    | 80  | RFC1      |
| chr2:110562611-110569724  | 16  | RGPD5     |
| chr15:59091058-59092640   | 5   | RNF111    |
| chr3:196483769-196487578  | 11  | RNF168    |
| chr11:77683709-77691238   | 16  | RSF1      |
| chr3:134207471-134211607  | 30  | RYK       |
| chr2:128014802-128017915  | 7   | SAP130    |
| chr4:109530288-109539667  | 6   | SEC24B    |
| chr3:47046486-47062346    | 5   | SETD2     |
| chr10:70844472-70851210   | 21  | SGPL1     |
| chr3:72841044-72844453    | 5   | SHQ1      |
| chr5:128147621-128152805  | 8   | SLC12A2   |
| chr2:113742691-113746339  | 9   | SLC35F5   |
| chr12:104909654-104928694 | 45  | SLC41A2   |
| chr7:17814833-17845694    | 11  | SNX13     |
| chr1:109340723-109345881  | 56  | SORT1     |
| chr12:49484589-49500205   | 7   | SPATS2    |
| chr15:44606024-44610985   | 7   | SPG11     |
| chr4:26919503-26957726    | 8   | STIM2     |
| chr2:196141248-196146055  | 10  | STK17B    |
| chr13:98474820-98475358   | 5   | STK24     |
| chr11:62824165-62827631   | 18  | STX5      |
| chr14:24974664-24974850   | 11  | STXBP6    |
| chr20:62857394-62860308   | 8   | TCFL5     |
| chr13:60509762-60510755   | 5   | TDRD3     |
| chr8:55802456-55805036    | 8   | TGS1      |
| chr10:49952125-49973142   | 17  | TIMM23B   |
| chr2:171082780-171092227  | 5   | TLK1      |
| chr11:61366044-61366216   | 5   | TMEM138   |
| chr2:102783893-102798000  | 9   | TMEM182   |
| chr18:23352195-23373763   | 6   | TMEM241   |
| chr15:43469857-43481022   | 12  | TP53BP1   |
| chr5:14316512-14330900    | 15  | TRIO      |



|                           |      |              |
|---------------------------|------|--------------|
| chr2:229858771-229860531  | 57   | TRIP12       |
| chr7:98930632-98931665    | 9    | TRRAP        |
| chr15:42829937-42872758   | 20   | TTBK2        |
| chr18:24064139-24069271   | 445  | TTC39C       |
| chr8:102342472-102346395  | 6    | UBR5         |
| chr1:62441487-62443319    | 10   | USP1         |
| chr17:78827244-78838750   | 42   | USP36        |
| chr7:6139091-6145656      | 21   | USP42        |
| chr17:31884423-31892794   | 19   | UTP6         |
| chr10:28589735-28596041   | 15   | WAC          |
| chr2:31339488-31383847    | 7    | XDH          |
| chr6:43570501-43573601    | 25   | XPO5         |
| chr3:142355400-142359931  | 6    | XRN1         |
| chr12:42199135-42210680   | 9    | YAF2         |
| chr3:141396258-141404031  | 47   | ZBTB38       |
| chr18:62544801-62556297   | 9    | ZCCHC2       |
| chr9:37126311-37190651    | 9    | ZCCHC7       |
| chr10:45639750-45663842   | 8    | ZFAND4       |
| chr17:32360597-32362984   | 17   | ZNF207       |
| chr6:87215902-87218731    | 1492 | ZNF292       |
| chr12:119728501-119730630 | 7    | CIT          |
| chr8:141136508-141138137  | 20   | DENND3       |
| chr1:225828724-225829534  | 6    | EPHX1        |
| chr8:42966472-42974194    | 11   | HOOK3        |
| chr13:41318805-41336756   | 17   | NAA16        |
| chr12:123110384-123141399 | 13   | PITPNM2      |
| chr8:99096311-99103120    | 14   | VPS13B       |
| chr18:76830675-76851939   | 7    | ZNF236       |
| chr1:6820180-6853189      | 7    | CAMTA1       |
| chr5:179708238-179710065  | 103  | CANX         |
| chr4:185188950-185191212  | 10   | CFAP97       |
| chr12:119757370-119767182 | 6    | CIT          |
| chr3:33535232-33551395    | 7    | CLASP2       |
| chr14:99850123-99865646   | 31   | EML1         |
| chr7:158735502-158739121  | 58   | ESYT2        |
| chr1:16294782-16305919    | 13   | FBXO42       |
| chrX:131695843-131794466  | 6    | FIRRE        |
| chr10:130159994-130166980 | 17   | GLRX3        |
| chr13:30240459-30280223   | 15   | KATNAL1      |
| chr5:62347129-62350120    | 6    | KIF2A        |
| chr20:25835983-25848948   | 7    | LOC101926935 |
| chr3:197814907-197832317  | 6    | LRCH3        |
| chr2:43905691-43925961    | 46   | LRPPRC       |

|                           |     |          |
|---------------------------|-----|----------|
| chr7:1936686-1957719      | 26  | MAD1L1   |
| chrX:57087613-57095538    | 18  | nogene   |
| chrX:27158904-27186657    | 30  | nogene   |
| chr18:9593767-9595153     | 28  | PPP4R1   |
| chr11:68567013-68596218   | 36  | PPP6R3   |
| chr11:64766899-64776626   | 6   | SF1      |
| chr7:17845594-17850964    | 223 | SNX13    |
| chr14:30955619-30956242   | 36  | STRN3    |
| chr1:108793581-108800305  | 30  | STXBP3   |
| chr7:7877280-7892554      | 5   | UMAD1    |
| chr21:15864267-15870147   | 8   | USP25    |
| chr2:61265396-61266167    | 6   | USP34    |
| chr4:147875020-147881932  | 16  | ARHGAP10 |
| chr12:27380246-27385560   | 13  | ARNTL2   |
| chr2:175097443-175121540  | 13  | ATF2     |
| chr9:97647491-97648223    | 20  | NCBP1    |
| chr7:5641153-5641376      | 28  | RNF216   |
| chr1:70228421-70239520    | 31  | SRSF11   |
| chr10:31852516-31854206   | 21  | ARHGAP12 |
| chr12:45836588-45839496   | 46  | ARID2    |
| chr5:179709872-179720560  | 204 | CANX     |
| chr20:39023689-39030775   | 5   | DHX35    |
| chr3:172761609-172783909  | 7   | ECT2     |
| chr6:15374116-15468718    | 5   | JARID2   |
| chr10:132337564-132344650 | 8   | LRRC27   |
| chr19:8539731-8540060     | 8   | nogene   |
| chr13:24469023-24486305   | 9   | PARP4    |
| chr2:65331986-65344896    | 25  | SPRED2   |
| chr8:119756005-119762608  | 14  | TAF2     |
| chr2:169986644-170029448  | 6   | UBR3     |
| chr6:38577599-38613033    | 14  | BTBD9    |
| chr14:20313467-20326793   | 8   | CCNB1IP1 |
| chr1:161851721-161863312  | 10  | ATF6     |
| chr11:129942425-129961082 | 12  | PRDM10   |
| chr19:58294097-58295581   | 20  | ZNF8     |
| chr17:40391505-40392737   | 34  | TOP2A    |
| chr19:43203885-43266695   | 14  | PSG4     |
| chr1:243545509-243552943  | 7   | AKT3     |
| chr2:38318534-38319019    | 11  | ATL2     |
| chr17:67928354-67929487   | 24  | BPTF     |
| chr18:23515855-23519174   | 35  | C18orf8  |
| chr12:31495809-31500670   | 7   | DENND5B  |
| chr10:99894945-99909146   | 8   | DNMBP    |

|                           |     |              |
|---------------------------|-----|--------------|
| chr8:55941854-55947723    | 45  | LYN          |
| chr15:99598429-99645764   | 5   | MEF2A        |
| chr8:128009589-128020719  | 6   | nogene       |
| chr3:196213105-196213911  | 5   | nogene       |
| chr5:171240927-171242820  | 103 | RANBP17      |
| chr3:159886206-159888943  | 10  | SCHIP1       |
| chr16:70567410-70569141   | 14  | SF3B3        |
| chr15:44592330-44598836   | 5   | SPG11        |
| chr12:63983946-64017012   | 17  | SRGAP1       |
| chr10:74070669-74072852   | 65  | VCL          |
| chr16:46668929-46677398   | 26  | VPS35        |
| chr3:119905754-120093593  | 18  | GSK3B        |
| chr16:70258979-70262524   | 102 | AARS         |
| chr2:65246523-65261392    | 6   | ACTR2        |
| chr9:85575314-85633374    | 7   | AGTPBP1      |
| chr16:56385918-56389375   | 524 | AMFR         |
| chr12:110381751-110396452 | 36  | ANAPC7       |
| chr14:34783761-34792921   | 30  | BAZ1A        |
| chr12:111658735-111660675 | 35  | BRAP         |
| chr12:433173-433472       | 6   | CCDC77       |
| chr2:171448680-171473975  | 35  | DCAF17       |
| chr3:50778674-50934077    | 16  | DOCK3        |
| chr7:2366316-2369682      | 47  | EIF3B        |
| chr17:80136003-80138280   | 28  | EIF4A3       |
| chr19:7973724-7991831     | 8   | ELAVL1       |
| chr6:53269086-53295707    | 32  | ELOVL5       |
| chr10:99679260-99679875   | 10  | ENTPD7       |
| chr1:22781420-22785076    | 34  | EPHB2        |
| chr17:76097795-76101863   | 10  | EXOC7        |
| chr6:70426569-70428419    | 15  | FAM135A      |
| chr12:32607956-32611283   | 65  | FGD4         |
| chr15:28167686-28169655   | 9   | HERC2        |
| chr11:9420410-9425262     | 97  | IPO7         |
| chr17:50075598-50076681   | 21  | ITGA3        |
| chr13:48256176-48258236   | 6   | ITM2B        |
| chr2:8798201-8803127      | 8   | KIDINS220    |
| chr1:183114530-183115637  | 36  | LAMC1        |
| chr12:50427761-50429090   | 149 | LARP4        |
| chr19:11106564-11107514   | 6   | LDLR         |
| chr4:103343091-103437046  | 6   | LOC101929448 |
| chr3:185428496-185437630  | 10  | MAP3K13      |
| chr6:136669282-136698682  | 60  | MAP3K5       |
| chr19:17200292-17200829   | 10  | MYO9B        |

|                          |     |           |
|--------------------------|-----|-----------|
| chr12:76067370-76068994  | 53  | NAP1L1    |
| chr14:75117194-75124223  | 7   | NEK9      |
| chr7:66479008-66488038   | 5   | nogene    |
| chr3:28251711-28298350   | 6   | nogene    |
| chr12:73329105-73363397  | 10  | nogene    |
| chr11:78513675-78514252  | 9   | nogene    |
| chr1:50598942-50599194   | 10  | nogene    |
| chr20:3907925-3910830    | 41  | PANK2     |
| chr2:10787280-10790833   | 6   | PDIA6     |
| chr4:39913610-39922748   | 26  | PDS5A     |
| chr5:115230975-115241606 | 23  | PGGT1B    |
| chr1:28407409-28408135   | 23  | PHACTR4   |
| chr7:11040671-11062085   | 19  | PHF14     |
| chr1:145853503-145854880 | 11  | PIAS3     |
| chr6:149540941-149541586 | 8   | PPIL4     |
| chr4:120798266-120821345 | 20  | PRDM5     |
| chr5:145703974-145826200 | 10  | PRELID2   |
| chr1:43619287-43620992   | 13  | PTPRF     |
| chrX:16852045-16853842   | 20  | RBBP7     |
| chr6:154787860-154795139 | 51  | SCAF8     |
| chr1:151658234-151658427 | 23  | SNX27     |
| chrX:124021366-124031125 | 8   | STAG2     |
| chr15:75859877-75873568  | 189 | UBE2Q2    |
| chr7:93252652-93276305   | 9   | VPS50     |
| chr16:74938149-74942826  | 10  | WDR59     |
| chr7:100023418-100024307 | 278 | ZKSCAN1   |
| chr19:52353681-52354379  | 20  | ZNF610    |
| chr1:64582155-64602912   | 8   | CACHD1    |
| chr4:113661712-113679496 | 6   | CAMK2D    |
| chr5:110742046-110748263 | 5   | SLC25A46  |
| chr16:69284047-69284244  | 70  | SNTB2     |
| chr3:142736378-142781029 | 5   | TRPC1     |
| chr1:155709772-155721618 | 16  | DAP3      |
| chr18:12358669-12360051  | 55  | AFG3L2    |
| chr4:80008520-80036032   | 13  | ANTXR2    |
| chr12:28225794-28391411  | 11  | CCDC91    |
| chr12:28255580-28259442  | 114 | CCDC91    |
| chr5:95906522-95913934   | 17  | ELL2      |
| chr17:41379569-41395370  | 18  | KRT34     |
| chr16:72555264-72617553  | 9   | LINC01572 |
| chr1:235793502-235801097 | 12  | LYST      |
| chr17:62029540-62035608  | 60  | MED13     |
| chr21:36362182-36364259  | 20  | MORC3     |

|                           |     |          |
|---------------------------|-----|----------|
| chr4:169463242-169508331  | 5   | NEK1     |
| chr1:88859132-88859592    | 11  | nogene   |
| chr9:78420279-78423212    | 50  | nogene   |
| chrX:131344059-131364926  | 37  | nogene   |
| chr5:25180728-25193209    | 13  | nogene   |
| chr8:73955910-73964625    | 7   | TCEB1    |
| chr1:21715388-21721764    | 11  | USP48    |
| chr7:93291702-93297243    | 78  | VPS50    |
| chr14:23081747-23090633   | 35  | ACIN1    |
| chr3:11355420-11426926    | 67  | ATG7     |
| chr6:80127546-80203212    | 37  | BCKDHB   |
| chr16:69139824-69154457   | 6   | CIRH1A   |
| chr4:38908591-38915073    | 6   | FAM114A1 |
| chr3:180947864-180951468  | 7   | FXR1     |
| chr22:37623326-37623633   | 13  | GGA1     |
| chr14:105155561-105157763 | 6   | JAG2     |
| chr6:52272300-52273916    | 9   | MCM3     |
| chr18:21791334-21804014   | 9   | MIB1     |
| chr22:29957035-29979052   | 24  | MTMR3    |
| chr11:74222311-74239256   | 18  | PPME1    |
| chr12:110730528-110731901 | 14  | PPP1CC   |
| chr19:34458768-34464131   | 6   | UBA2     |
| chr6:89329782-89343756    | 16  | UBE2J1   |
| chr1:93642303-93674941    | 483 | BCAR3    |
| chr9:15622737-15623413    | 10  | CCDC171  |
| chr1:156320838-156334918  | 53  | CCT3     |
| chr5:138191473-138201448  | 6   | CDC23    |
| chr10:68957530-68960249   | 6   | DDX21    |
| chr2:229585857-229591888  | 33  | DNER     |
| chr3:150575648-150581746  | 56  | EIF2A    |
| chr11:6222441-6224707     | 12  | FAM160A2 |
| chr2:85013935-85028056    | 12  | KCMF1    |
| chr14:55653016-55658614   | 27  | KTN1     |
| chr16:4657245-4673657     | 8   | MGRN1    |
| chr2:15287072-15309247    | 20  | NBAS     |
| chr3:131080422-131133956  | 7   | NEK11    |
| chr3:42617569-42621516    | 7   | NKTR     |
| chr14:76229807-76236003   | 8   | nogene   |
| chr11:75404059-75404835   | 6   | nogene   |
| chr12:122403786-122404352 | 14  | nogene   |
| chr6:17647806-17665385    | 7   | NUP153   |
| chr16:71690518-71714801   | 78  | PHLPP2   |
| chr8:78558342-78572939    | 23  | PKIA     |

|                           |     |          |
|---------------------------|-----|----------|
| chr1:145839889-145842477  | 95  | POLR3C   |
| chr9:131432616-131439061  | 19  | PRRC2B   |
| chr14:90943077-90978524   | 11  | RPS6KA5  |
| chr12:48083590-48098124   | 81  | SENP1    |
| chr10:67887416-67889123   | 14  | SIRT1    |
| chr6:99531362-99531790    | 9   | TSTD3    |
| chr3:120000551-120002239  | 14  | GSK3B    |
| chr22:38267726-38268122   | 6   | nogene   |
| chr3:39063049-39068859    | 7   | WDR48    |
| chr2:97142639-97154741    | 61  | ANKRD36  |
| chr15:83030135-83041925   | 5   | BTBD1    |
| chr10:73146275-73163950   | 18  | ECD      |
| chr12:1027747-1028572     | 896 | ERC1     |
| chr5:176486354-176494275  | 6   | FAF2     |
| chr16:53810139-53844298   | 8   | FTO      |
| chr1:45727630-45729769    | 16  | IPP      |
| chr1:113585386-113590658  | 7   | MAGI3    |
| chr20:5958527-5986131     | 5   | MCM8     |
| chr12:5270204-5276889     | 51  | nogene   |
| chr1:53302011-53302440    | 5   | nogene   |
| chr2:158631752-158640759  | 15  | PKP4     |
| chr22:42599697-42603160   | 6   | POLDIP3  |
| chr1:100011364-100017815  | 11  | SLC35A3  |
| chr7:17868406-17897446    | 357 | SNX13    |
| chr6:121170404-121256285  | 10  | TBC1D32  |
| chr2:84839148-84853410    | 9   | TRABD2A  |
| chr15:50570103-50575789   | 5   | TRPM7    |
| chr16:2070455-2074389     | 6   | TSC2     |
| chr3:184957373-184971752  | 39  | VPS8     |
| chr21:39209994-39215362   | 9   | BRWD1    |
| chr17:81099927-81108509   | 6   | BAIAP2   |
| chr6:592468-599225        | 126 | EXOC2    |
| chr10:68393137-68404844   | 11  | RUFY2    |
| chr11:108127885-108134316 | 6   | ACAT1    |
| chr2:9509978-9536828      | 8   | ADAM17   |
| chr5:143014079-143057747  | 6   | ARHGAP26 |
| chr6:34646600-34654779    | 143 | C6orf106 |
| chr5:10260911-10261518    | 14  | CCT5     |
| chr10:14945104-14945565   | 7   | DCLRE1C  |
| chr16:23532656-23552304   | 6   | EARS2    |
| chr3:96936013-96987993    | 8   | EPHA6    |
| chr7:50669721-50710990    | 16  | GRB10    |
| chr2:177219036-177222133  | 12  | HNRNPA3  |

|                           |      |          |
|---------------------------|------|----------|
| chr6:116692054-116705160  | 7    | KPNA5    |
| chr3:113721794-113724095  | 8    | NAA50    |
| chr1:155732479-155732757  | 47   | nogene   |
| chrX:14244206-14245044    | 7    | nogene   |
| chr3:38183002-38216151    | 12   | OXSR1    |
| chr12:79613574-79621207   | 17   | PAWR     |
| chr21:46334396-46334768   | 24   | PCNT     |
| chr14:71009633-71036157   | 12   | PCNX     |
| chr1:233160282-233227371  | 7    | PCNXL2   |
| chr3:127660377-127662311  | 13   | PODXL2   |
| chr18:9570156-9595102     | 11   | PPP4R1   |
| chr7:579255-607452        | 7    | PRKAR1B  |
| chr3:196471978-196475312  | 17   | RNF168   |
| chr10:68383797-68386128   | 7    | RUFY2    |
| chr11:62881018-62882066   | 7    | SLC3A2   |
| chr10:69483690-69498396   | 53   | TSPAN15  |
| chr4:102799406-102809855  | 14   | UBE2D3   |
| chr9:83679774-83686155    | 273  | UBQLN1   |
| chr6:41803805-41916939    | 7    | USP49    |
| chr17:61776400-61781005   | 10   | BRIP1    |
| chr5:157294782-157296774  | 18   | CYFIP2   |
| chr6:56735227-56900621    | 7    | DST      |
| chr9:111386376-111391824  | 1842 | KIAA0368 |
| chr14:92116101-92117642   | 12   | NDUFB1   |
| chr22:28514756-28550151   | 38   | nogene   |
| chrX:54636234-54636427    | 189  | nogene   |
| chr20:36793248-36794599   | 8    | SOGA1    |
| chr9:36594627-36651877    | 6    | MELK     |
| chr8:102264473-102270183  | 5    | UBR5     |
| chr2:202555251-202556531  | 11   | BMPR2    |
| chr17:41997114-42003557   | 9    | DNAJC7   |
| chr4:105691975-105693486  | 67   | INTS12   |
| chr22:38687306-38688316   | 9    | nogene   |
| chr3:17622647-17625224    | 20   | nogene   |
| chr6:85618817-85624112    | 64   | SYNCRIP  |
| chr8:124503839-124516030  | 10   | TATDN1   |
| chr16:71749893-71764726   | 6    | AP1G1    |
| chr5:180569109-180571432  | 59   | CNOT6    |
| chr1:176116623-176136547  | 59   | RFWD2    |
| chr18:12366964-12371691   | 183  | AFG3L2   |
| chr21:25975069-25982477   | 94   | APP      |
| chr12:22517985-22527892   | 11   | C2CD5    |
| chr12:122797306-122798200 | 10   | CCDC62   |

|                           |     |              |
|---------------------------|-----|--------------|
| chr1:160305432-160314125  | 9   | COPA         |
| chr7:66573414-66576932    | 9   | GS1-124K5.11 |
| chr6:57052685-57055797    | 28  | KIAA1586     |
| chr3:183037217-183041750  | 5   | MCCC1        |
| chr4:102533847-102567135  | 8   | NFKB1        |
| chr4:103536345-103593429  | 16  | nogene       |
| chr1:229495494-229498306  | 21  | NUP133       |
| chr17:16325799-16326905   | 11  | PIGL         |
| chr3:125451304-125460860  | 8   | SNX4         |
| chr17:82797756-82814934   | 7   | TBCD         |
| chr6:126008391-126013101  | 10  | TRMT11       |
| chr2:178535731-178537691  | 27  | TTN-AS1      |
| chr12:133041277-133048848 | 18  | ZNF84        |
| chr18:21773623-21779685   | 70  | MIB1         |
| chr9:130854063-130863035  | 16  | ABL1         |
| chr2:9521202-9527954      | 11  | ADAM17       |
| chr8:130401884-130427822  | 8   | ASAP1        |
| chr13:25769045-25774959   | 45  | ATP8A2       |
| chr11:119273867-119274953 | 183 | CBL          |
| chr12:28362437-28391411   | 15  | CCDC91       |
| chr2:207740654-207751119  | 6   | CCNYL1       |
| chr22:28734402-28734727   | 13  | CHEK2        |
| chr3:33663444-33689932    | 21  | CLASP2       |
| chr14:69089947-69091887   | 5   | DCAF5        |
| chr1:168038370-168045227  | 21  | DCAF6        |
| chr22:38495795-38498573   | 18  | DDX17        |
| chr12:50685832-50697175   | 8   | DIP2B        |
| chr21:37410569-37421866   | 11  | DYRK1A       |
| chr12:53021805-53028188   | 72  | EIF4B        |
| chr9:20717793-20758191    | 9   | FOCAD        |
| chr14:51689690-51712551   | 6   | FRMD6        |
| chr5:151786571-151795575  | 75  | G3BP1        |
| chr12:120175161-120176217 | 35  | GCN1         |
| chr10:5768212-5800705     | 174 | GDI2         |
| chr8:41530183-41541899    | 17  | GINS4        |
| chr18:21395384-21403994   | 7   | GREB1L       |
| chr11:18283794-18286710   | 13  | HPS5         |
| chr15:98891324-98899621   | 12  | IGF1R        |
| chr7:23317638-23351586    | 9   | IGF2BP3      |
| chr10:863742-870083       | 15  | LARP4B       |
| chr19:45280373-45280734   | 79  | MARK4        |
| chr3:152445281-152447773  | 24  | MBNL1        |
| chr15:41696074-41697023   | 33  | MGA          |



|                           |     |          |
|---------------------------|-----|----------|
| chr10:68174065-68174656   | 79  | MYPN     |
| chr18:12323715-12324544   | 7   | nogene   |
| chr2:155809927-155812794  | 9   | nogene   |
| chr2:10788696-10793202    | 11  | PDIA6    |
| chr6:42966781-42975038    | 6   | PEX6     |
| chr22:20764816-20765693   | 6   | PI4KA    |
| chr1:88740987-88760376    | 23  | PKN2     |
| chr1:167332469-167338258  | 24  | POU2F1   |
| chr12:42351884-42398994   | 108 | PPHLN1   |
| chr2:135661269-135675486  | 7   | R3HDM1   |
| chr2:37929261-38017235    | 6   | RMDN2    |
| chrX:72272639-72276234    | 6   | RPS4X    |
| chr3:9443307-9445740      | 7   | SETD5    |
| chr3:125451304-125453955  | 13  | SNX4     |
| chr4:123028185-123057288  | 52  | SPATA5   |
| chr2:168873584-168877384  | 13  | SPC25    |
| chr6:45105921-45365301    | 23  | SUPT3H   |
| chr1:11016843-11018873    | 28  | TARDBP   |
| chr6:42678538-42679832    | 10  | UBR2     |
| chr6:99507427-99510230    | 12  | USP45    |
| chr7:93291702-93311272    | 71  | VPS50    |
| chr18:56756582-56781656   | 9   | WDR7     |
| chr17:40256390-40260667   | 12  | WIPF2    |
| chr11:57682421-57688665   | 14  | ZDHHC5   |
| chr16:84979188-84981994   | 9   | ZDHHC7   |
| chr1:229525935-229531731  | 9   | ABCB10   |
| chr20:25306832-25309575   | 19  | ABHD12   |
| chr8:39054480-39055772    | 19  | ADAM9    |
| chr3:123347781-123352581  | 6   | ADCY5    |
| chr22:40358863-40360492   | 7   | ADSL     |
| chr1:243664771-243695716  | 8   | AKT3     |
| chr17:4235771-4249248     | 12  | ANKFY1   |
| chr2:96853400-96854441    | 8   | ANKRD39  |
| chr9:97994630-98005153    | 132 | ANP32B   |
| chr15:89888520-89889140   | 7   | AP3S2    |
| chr11:130126699-130133728 | 53  | APLP2    |
| chr15:34927034-34932434   | 12  | AQR      |
| chr15:34890214-34893773   | 8   | AQR      |
| chr14:32090501-32094386   | 9   | ARHGAP5  |
| chr6:157110471-157133207  | 51  | ARID1B   |
| chr5:78955294-78985558    | 62  | ARSB     |
| chr10:121910905-121924329 | 31  | ATE1     |
| chr12:123718622-123724791 | 17  | ATP6V0A2 |

|                           |     |           |
|---------------------------|-----|-----------|
| chr1:179378636-179395202  | 6   | AXDND1    |
| chr6:80342857-80343812    | 6   | BCKDHB    |
| chr17:67853939-67866687   | 7   | BPTF      |
| chr12:111649938-111660675 | 12  | BRAP      |
| chr17:43063332-43074521   | 25  | BRCA1     |
| chr7:25151595-25155192    | 5   | C7orf31   |
| chr1:200760838-200761098  | 33  | CAMSAP2   |
| chr11:34071725-34076642   | 468 | CAPRIN1   |
| chr12:48712261-48714524   | 10  | CCNT1     |
| chr3:138570317-138591956  | 8   | CEP70     |
| chr11:46795593-46809874   | 8   | CKAP5     |
| chr15:65153546-65155081   | 53  | CLPX      |
| chr9:67173859-67201219    | 15  | CNTNAP3P2 |
| chr7:43639448-43645399    | 7   | COA1      |
| chr16:67628369-67629533   | 156 | CTCF      |
| chr11:70405264-70414652   | 54  | CTTN      |
| chr10:14926842-14935564   | 6   | DCLRE1C   |
| chr3:182961225-182965753  | 20  | DCUN1D1   |
| chr1:85350414-85360537    | 45  | DDAH1     |
| chr10:68963290-68974743   | 8   | DDX21     |
| chr1:197617658-197658369  | 10  | DENND1B   |
| chr1:197583151-197772932  | 18  | DENND1B   |
| chr8:123015392-123030716  | 17  | DERL1     |
| chr12:50685832-50686682   | 6   | DIP2B     |
| chr11:112037272-112045230 | 7   | DLAT      |
| chr3:197130526-197149796  | 72  | DLG1      |
| chr7:87163494-87174669    | 119 | DMTF1     |
| chr10:127042624-127061776 | 32  | DOCK1     |
| chr15:65478879-65481615   | 11  | DPP8      |
| chr16:68025414-68054617   | 57  | DUS2      |
| chr2:55870719-55881734    | 21  | EFEMP1    |
| chr22:36523208-36524732   | 14  | EIF3D     |
| chr17:13010612-13013275   | 11  | ELAC2     |
| chr3:9986506-10023747     | 18  | EMC3      |
| chr19:43526200-43526659   | 11  | ETHE1     |
| chr12:11884444-11886026   | 17  | ETV6      |
| chr10:92997473-93058335   | 19  | EXOC6     |
| chr5:138006989-138011945  | 53  | FAM13B    |
| chr2:131055271-131055695  | 35  | FAM168B   |
| chr3:56627036-56628614    | 99  | FAM208A   |
| chr7:102822039-102822440  | 6   | FBXL13    |
| chr5:108186116-108367953  | 7   | FBXL17    |
| chr2:47835871-47839769    | 7   | FBXO11    |

|                           |     |              |
|---------------------------|-----|--------------|
| chrX:131749305-131770551  | 7   | FIRRE        |
| chrX:131711650-131785258  | 9   | FIRRE        |
| chr9:20715321-20874807    | 8   | FOCAD        |
| chr4:75658842-75662049    | 23  | G3BP2        |
| chr4:881906-884086        | 7   | GAK          |
| chr4:911672-913668        | 21  | GAK          |
| chr10:130145210-130166679 | 8   | GLRX3        |
| chr17:30481142-30490217   | 45  | GOSR1        |
| chr2:27638209-27641279    | 5   | GPN1         |
| chr10:1000676-1001013     | 5   | GTPBP4       |
| chr6:104833041-104852371  | 85  | HACE1        |
| chr2:171925536-171976308  | 19  | HAT1         |
| chr2:37037854-37057480    | 5   | HEATR5B      |
| chr10:68032777-68073686   | 15  | HERC4        |
| chr22:35262322-35263226   | 6   | HMGXB4       |
| chr8:42925556-42943445    | 85  | HOOK3        |
| chr7:27163574-27164967    | 10  | HOXA10-HOXA9 |
| chr9:92287790-92288282    | 13  | IARS         |
| chr10:132607914-132650505 | 13  | INPP5A       |
| chr19:7172289-7174731     | 6   | INSR         |
| chr6:18197056-18201657    | 8   | KDM1B        |
| chr5:138372673-138375206  | 30  | KDM3B        |
| chr5:138398177-138415239  | 10  | KDM3B        |
| chr14:35126734-35180777   | 60  | KIAA0391     |
| chr4:128466607-128483487  | 9   | LOC100507487 |
| chr1:84865384-84866138    | 20  | LPAR3        |
| chr2:43960540-43982434    | 6   | LRPPRC       |
| chr17:63634708-63657907   | 5   | MAP3K3       |
| chr18:54159764-54205157   | 32  | MBD2         |
| chr3:183057310-183071357  | 11  | MCCC1        |
| chr5:71592925-71604468    | 132 | MCCC2        |
| chr12:82369386-82438791   | 11  | METTL25      |
| chr2:42695764-42723035    | 10  | MTA3         |
| chr8:65669872-65693759    | 16  | MTRFR1       |
| chr6:150905649-150926295  | 20  | MTHFD1L      |
| chr4:74174505-74281550    | 29  | MTHFD2L      |
| chr1:236803427-236806233  | 14  | MTR          |
| chr10:93323077-93329834   | 10  | MYOF         |
| chr1:58681784-58682545    | 13  | MYSM1        |
| chr11:78566131-78571444   | 15  | NARS2        |
| chr2:15511211-15558634    | 14  | NBAS         |
| chr1:148106180-148108654  | 7   | NBPF11       |
| chr12:124419956-124437996 | 28  | NCOR2        |

|                           |     |          |
|---------------------------|-----|----------|
| chr4:169580841-169590809  | 97  | NEK1     |
| chr4:47884345-47894302    | 6   | NFXL1    |
| chr4:47903192-47905346    | 17  | NFXL1    |
| chr14:50792711-50806818   | 7   | NIN      |
| chr1:25315937-25318271    | 12  | nogene   |
| chr2:111321602-111344237  | 6   | nogene   |
| chr5:126626507-126626672  | 12  | nogene   |
| chr4:139403848-139404490  | 14  | nogene   |
| chr1:246186742-246199767  | 31  | nogene   |
| chrX:131332206-131364926  | 6   | nogene   |
| chr2:38782704-38782963    | 28  | nogene   |
| chr6:77151200-77212053    | 96  | nogene   |
| chr2:75120928-75122967    | 6   | nogene   |
| chr10:13637996-13648230   | 10  | nogene   |
| chr17:47596352-47613725   | 7   | NPEPPS   |
| chr12:68731109-68731719   | 6   | NUP107   |
| chr2:219566829-219568324  | 21  | OBSL1    |
| chr7:24861612-24892621    | 9   | OSBPL3   |
| chr17:2638098-2638320     | 5   | PAFAH1B1 |
| chr10:34470084-34696419   | 7   | PARD3    |
| chr1:233198938-233236980  | 102 | PCNXL2   |
| chr5:115236389-115238009  | 6   | PGGT1B   |
| chr11:17102661-17114465   | 5   | PIK3C2A  |
| chr16:8801798-8806407     | 15  | PMM2     |
| chr2:189791789-189795951  | 8   | PMS1     |
| chr18:54271359-54277855   | 27  | POLI     |
| chr2:44201185-44202045    | 6   | PPM1B    |
| chr14:103773632-103797518 | 8   | PPP1R13B |
| chr14:23301885-23302159   | 9   | PPP1R3E  |
| chr9:125153532-125153985  | 11  | PPP6C    |
| chr14:73147794-73198129   | 65  | PSEN1    |
| chr1:96751424-96785254    | 10  | PTBP2    |
| chr8:140717597-140752316  | 11  | PTK2     |
| chr6:43138848-43139525    | 106 | PTK7     |
| chr2:119926597-119945240  | 28  | PTPN4    |
| chr4:17501718-17509363    | 35  | QDPR     |
| chr10:98156092-98163397   | 68  | R3HCC1L  |
| chr20:20639784-20653587   | 6   | RALGAPA2 |
| chr7:22219865-22230919    | 5   | RAPGEF5  |
| chr9:133408767-133412921  | 32  | REXO4    |
| chr17:32182756-32194107   | 8   | RHOT1    |
| chr6:45422592-45438051    | 5   | RUNX2    |
| chr11:9989496-10002689    | 11  | SBF2     |

|                           |    |          |
|---------------------------|----|----------|
| chr3:195668518-195677848  | 6  | SDHAP2   |
| chr7:3619079-3642105      | 57 | SDK1     |
| chr10:119902798-119904277 | 24 | SEC23IP  |
| chr4:109530288-109531522  | 25 | SEC24B   |
| chr8:66793615-66798625    | 6  | SGK3     |
| chr9:37948634-37974837    | 5  | SHB      |
| chr19:16552805-16555397   | 5  | SLC35E1  |
| chr10:103990674-103993133 | 10 | SLK      |
| chr3:57841298-57858159    | 29 | SLMAP    |
| chr14:77732484-77736006   | 7  | SNW1     |
| chr18:26052623-26078160   | 61 | SS18     |
| chr2:152144887-152150229  | 12 | STAM2    |
| chr15:42665252-42669337   | 16 | STARD9   |
| chr6:10893866-10898115    | 25 | SYCP2L   |
| chr6:10910147-10912927    | 5  | SYCP2L   |
| chr6:121279120-121299505  | 8  | TBC1D32  |
| chr3:17403180-17428519    | 9  | TBC1D5   |
| chr3:196062581-196065600  | 8  | TFRC     |
| chr2:105307613-105308318  | 6  | TGFBRAP1 |
| chr2:70224553-70230854    | 53 | TIA1     |
| chr12:29755708-29758777   | 5  | TMTC1    |
| chr10:91819269-91842391   | 20 | TNKS2    |
| chr1:235113767-235122372  | 7  | TOMM20   |
| chr3:133637875-133640170  | 6  | TOPBP1   |
| chr1:179085627-179088089  | 11 | TOR3A    |
| chr1:3740232-3746186      | 11 | TP73-AS1 |
| chr6:99526063-99531790    | 7  | TSTD3    |
| chr15:43376097-43377067   | 32 | TUBGCP4  |
| chr9:35236468-35259050    | 49 | UNC13B   |
| chr18:196636-203190       | 40 | USP14    |
| chr2:61211771-61214694    | 5  | USP34    |
| chr2:218474629-218474885  | 6  | USP37    |
| chr6:144789193-144803147  | 5  | UTRN     |
| chr4:84849901-84912319    | 8  | WDFY3    |
| chr7:64851798-64858602    | 7  | ZNF138   |
| chr16:2448854-2449915     | 13 | CCNF     |
| chr16:67947668-67950493   | 6  | SLC12A4  |
| chr18:12493071-12496102   | 23 | SPIRE1   |
| chr7:103115059-103128792  | 29 | NAPEPLD  |
| chr2:44490785-44505730    | 40 | nogene   |
| chr5:109713495-109716264  | 6  | MAN2A1   |
| chr10:133398434-133399653 | 55 | MTG1     |
| chr10:11948368-11952249   | 20 | UPF2     |

|                           |     |          |
|---------------------------|-----|----------|
| chr15:22523346-22539247   | 23  | HERC2P2  |
| chr16:66816580-66821559   | 7   | NAE1     |
| chr1:75732643-75734871    | 26  | ACADM    |
| chr11:120406117-120431911 | 91  | ARHGEF12 |
| chr10:72128081-72213331   | 6   | ASCC1    |
| chr16:87975047-87984259   | 472 | BANP     |
| chr3:15230441-15240853    | 6   | CAPN7    |
| chr20:33573973-33574261   | 6   | CBFA2T2  |
| chr16:12704623-12705049   | 15  | CPPED1   |
| chr7:87163494-87171089    | 25  | DMTF1    |
| chr4:152411302-152469988  | 28  | FBXW7    |
| chr10:87057690-87062835   | 6   | GLUD1    |
| chr7:107189291-107196151  | 7   | HBP1     |
| chr14:61744704-61745817   | 14  | HIF1A    |
| chr19:38845852-38847434   | 16  | HNRNPL   |
| chr2:186633328-186641588  | 20  | ITGAV    |
| chr17:46082440-46172232   | 6   | KANSL1   |
| chr13:30255446-30280223   | 20  | KATNAL1  |
| chr11:67207509-67219403   | 9   | KDM2A    |
| chr18:50918109-50921187   | 17  | ME2      |
| chr11:20054079-20083179   | 8   | NAV2     |
| chr9:137272222-137272481  | 7   | NELFB    |
| chr2:172586277-172596023  | 6   | PDK1     |
| chr4:185523361-185525171  | 6   | PDLIM3   |
| chr13:32629292-32652007   | 5   | PDS5B    |
| chr10:3101364-3109480     | 12  | PFKP     |
| chr1:88740987-88786213    | 32  | PKN2     |
| chrX:338603-347693        | 171 | PPP2R3B  |
| chr6:170537233-170549113  | 83  | PSMB1    |
| chr10:98162882-98186563   | 9   | R3HCC1L  |
| chr2:135090997-135135932  | 6   | RAB3GAP1 |
| chr10:6097047-6115311     | 8   | RBM17    |
| chr6:33272627-33276066    | 7   | RPS18    |
| chr15:76753807-76767088   | 13  | SCAPER   |
| chr10:49943234-49958480   | 9   | TIMM23B  |
| chr20:50143501-50151315   | 15  | TMEM189  |
| chr1:211353238-211354467  | 69  | TRAF5    |
| chr5:14297071-14304592    | 12  | TRIO     |
| chr2:159248371-159282873  | 7   | WDSUB1   |
| chr8:38290474-38299590    | 6   | WHSC1L1  |
| chr1:35005131-35008924    | 10  | ZMYM6    |
| chr6:116647458-116660846  | 8   | ZUFSP    |
| chr10:94592228-94594854   | 7   | HELLS    |

|                           |      |         |
|---------------------------|------|---------|
| chr8:127982359-128010444  | 12   | nogene  |
| chr10:31387123-31387798   | 10   | nogene  |
| chr14:88852970-88872452   | 8    | TTC8    |
| chr11:125643791-125644643 | 10   | CHEK1   |
| chr3:32762732-32764809    | 9    | CNOT10  |
| chr7:6040891-6041219      | 10   | EIF2AK1 |
| chr9:19086733-19096769    | 19   | HAUS6   |
| chr16:1557934-1607297     | 6    | IFT140  |
| chr1:233135012-233161363  | 162  | PCNXL2  |
| chr2:152143826-152150229  | 11   | STAM2   |
| chr11:118779631-118786518 | 43   | DDX6    |
| chr8:47440322-47491994    | 14   | SPIDR   |
| chr7:149153944-149166930  | 5    | ZNF398  |
| chr2:158620989-158621421  | 8    | PKP4    |
| chr9:131436619-131459356  | 9    | PRRC2B  |
| chr14:101892999-101909690 | 10   | PPP2R5C |
| chr16:66608308-66610003   | 112  | CMTM3   |
| chr20:63928334-63931182   | 21   | DNAJC5  |
| chr4:53399729-53444103    | 47   | FIP1L1  |
| chr16:56935234-56936817   | 7    | HERPUD1 |
| chr3:152414940-152432920  | 58   | MBNL1   |
| chr6:43175705-43176667    | 8    | SRF     |
| chr2:43428099-43430302    | 53   | THADA   |
| chr4:39733358-39774933    | 13   | UBE2K   |
| chr15:34256228-34261020   | 17   | SLC12A6 |
| chr15:58640776-58665197   | 13   | ADAM10  |
| chr6:16657775-16753347    | 30   | ATXN1   |
| chr13:31215050-31286819   | 19   | B3GLCT  |
| chrX:130024989-130025379  | 29   | BCORL1  |
| chr2:32478634-32479617    | 76   | BIRC6   |
| chr9:135881632-135883078  | 4492 | CAMSAP1 |
| chr11:66599115-66600549   | 11   | CCS     |
| chr17:64519320-64529427   | 16   | CEP95   |
| chr16:66622061-66636581   | 13   | CMTM4   |
| chr5:138810037-138812302  | 149  | CTNNA1  |
| chr11:103115176-103121496 | 6    | DYNC2H1 |
| chr17:82092454-82092812   | 8    | FASN    |
| chr10:102375358-102377140 | 7    | GBF1    |
| chr3:155893517-155898840  | 13   | GMPS    |
| chr11:9420410-9431003     | 11   | IPO7    |
| chr10:63380317-63450105   | 11   | JMJD1C  |
| chr11:67217730-67228163   | 9    | KDM2A   |
| chr16:25128474-25151615   | 8    | LCMT1   |

|                           |    |           |
|---------------------------|----|-----------|
| chr22:47704588-47728995   | 11 | LOC284930 |
| chr19:34221506-34221738   | 42 | LSM14A    |
| chr13:35040932-35050395   | 20 | NBEA      |
| chr5:150614557-150626886  | 9  | nogene    |
| chr1:28372167-28372574    | 8  | nogene    |
| chr1:233177801-233227371  | 21 | PCNXL2    |
| chr4:39913610-39920399    | 8  | PDS5A     |
| chr9:131506113-131507514  | 12 | POMT1     |
| chr18:12801969-12862744   | 6  | PTPN2     |
| chr17:5361207-5365238     | 6  | RABEP1    |
| chr9:136446854-136448161  | 27 | SEC16A    |
| chr4:26620612-26640187    | 20 | TBC1D19   |
| chr12:98527885-98531838   | 10 | TMPO      |
| chr11:1288623-1290409     | 14 | TOLLIP    |
| chr3:179681877-179708957  | 49 | USP13     |
| chr13:20799164-20800990   | 23 | XPO4      |
| chr10:74358443-74398579   | 7  | ADK       |
| chr11:119271734-119278713 | 8  | CBL       |
| chr6:33320010-33321567    | 7  | DAXX      |
| chrX:97348115-97462165    | 7  | DIAPH2    |
| chr8:42288633-42293512    | 12 | IKBKB     |
| chr9:131430089-131447206  | 9  | PRRC2B    |
| chr9:6460572-6465846      | 11 | UHRF2     |
| chr5:77463094-77467470    | 7  | WDR41     |
| chr9:86303085-86304947    | 34 | ZCCHC6    |
| chr1:226961376-226965737  | 37 | ADCK3     |
| chrX:110264488-110279274  | 9  | AMMECR1   |
| chr2:200634790-200642801  | 7  | AOX1      |
| chr5:140563593-140563915  | 6  | APBB3     |
| chr13:111283138-111288443 | 7  | ARHGEF7   |
| chr17:61743012-61744591   | 6  | BRIP1     |
| chr6:149578821-149580723  | 11 | GINM1     |
| chr2:190910262-190913364  | 10 | GLS       |
| chr14:21230318-21263336   | 39 | HNRNPC    |
| chr19:48161371-48165623   | 7  | LIG1      |
| chr3:188341655-188406313  | 7  | LPP       |
| chr2:170752526-170753006  | 55 | nogene    |
| chr12:122417218-122417622 | 8  | nogene    |
| chr4:34979647-35005121    | 14 | nogene    |
| chr9:131162990-131164144  | 12 | NUP214    |
| chr14:20352244-20354247   | 33 | PARP2     |
| chr5:160422301-160424330  | 15 | PTTG1     |
| chr12:55796024-55803728   | 15 | SARNP     |



|                           |     |           |
|---------------------------|-----|-----------|
| chr2:32193888-32206933    | 6   | SLC30A6   |
| chr2:152147161-152148300  | 7   | STAM2     |
| chr20:13528432-13537049   | 6   | TASP1     |
| chr2:97888051-97927487    | 6   | TMEM131   |
| chr15:63532646-63537156   | 63  | USP3      |
| chr17:31878249-31880754   | 31  | UTP6      |
| chr11:62839113-62839706   | 10  | WDR74     |
| chr7:139073855-139089759  | 14  | ZC3HAV1   |
| chr5:32414968-32415187    | 8   | ZFR       |
| chr3:195306510-195320813  | 62  | ACAP2     |
| chr5:73911274-73911575    | 19  | ARHGEF28  |
| chr4:83267585-83279114    | 36  | COQ2      |
| chr2:186740227-186754049  | 7   | FAM171B   |
| chr15:92885514-92892072   | 79  | LINC01578 |
| chr1:67395404-67402417    | 7   | nogene    |
| chr1:28202012-28202389    | 12  | nogene    |
| chr17:43204215-43204530   | 18  | nogene    |
| chr11:3773631-3776021     | 19  | NUP98     |
| chr7:5740972-5741644      | 15  | RNF216    |
| chr21:34834409-34887096   | 8   | RUNX1     |
| chr3:42555929-42563686    | 8   | SEC22C    |
| chr16:68875153-68880630   | 25  | TANGO6    |
| chr10:12403101-12406326   | 7   | nogene    |
| chr8:103401515-103407784  | 28  | SLC25A32  |
| chr4:107687038-107701285  | 12  | PAPSS1    |
| chr11:108138897-108140215 | 11  | ACAT1     |
| chr22:25661575-25678915   | 72  | ADRBK2    |
| chr12:49665831-49668554   | 20  | FMNL3     |
| chr1:176027571-176116681  | 10  | RFWD2     |
| chr5:148394713-148399132  | 6   | FBXO38    |
| chr11:57698558-57700397   | 41  | ZDHHC5    |
| chr13:24477700-24498229   | 12  | PARP4     |
| chr16:70329291-70365131   | 13  | DDX19B    |
| chr2:61343814-61350693    | 13  | USP34     |
| chr6:90550467-90571807    | 24  | MAP3K7    |
| chr11:76007533-76016980   | 8   | UVRAG     |
| chr15:72555270-72572165   | 9   | ARIH1     |
| chr17:63764015-63766194   | 43  | CCDC47    |
| chr15:74923647-74926887   | 219 | COX5A     |
| chr19:10173870-10177367   | 40  | DNMT1     |
| chr1:16633094-16635168    | 7   | nogene    |
| chr5:134158454-134174007  | 6   | SKP1      |
| chr8:124495471-124516030  | 8   | TATDN1    |

|                           |     |          |
|---------------------------|-----|----------|
| chr20:31778812-31782390   | 9   | TPX2     |
| chr18:31864626-31890866   | 7   | TRAPPC8  |
| chr5:43122038-43123310    | 48  | ZNF131   |
| chr16:71738941-71739341   | 42  | AP1G1    |
| chr11:130109428-130130166 | 12  | APLP2    |
| chr8:130358016-130370274  | 13  | ASAP1    |
| chr2:9318523-9327911      | 138 | ASAP2    |
| chr21:33907340-33909211   | 8   | ATP5O    |
| chr13:32319076-32325184   | 6   | BRCA2    |
| chr2:202954004-202955758  | 12  | CARF     |
| chr6:110201557-110213160  | 5   | CDC40    |
| chr7:92117043-92118615    | 7   | CYP51A1  |
| chr6:113953276-113960018  | 6   | HDAC2    |
| chr20:34489265-34504403   | 30  | ITCH     |
| chr11:68347846-68365702   | 137 | LRP5     |
| chr1:39350784-39359264    | 38  | MACF1    |
| chr5:36197540-36227565    | 5   | NADK2    |
| chr2:15504144-15558634    | 14  | NBAS     |
| chr8:89964409-89971290    | 9   | NBN      |
| chr17:28163542-28185265   | 6   | NLK      |
| chr20:44305744-44306001   | 24  | nogene   |
| chr5:170878096-170892553  | 21  | RANBP17  |
| chr6:89368055-89387590    | 5   | RRAGD    |
| chr9:113256113-113258862  | 27  | SLC31A1  |
| chr13:29516137-29524253   | 7   | SLC7A1   |
| chr6:85517755-85536924    | 15  | SNX14    |
| chr9:88426381-88426591    | 8   | SPIN1    |
| chr12:108817037-108823361 | 69  | SSH1     |
| chr3:196073929-196077122  | 32  | TFRC     |
| chr2:229802251-229807864  | 15  | TRIP12   |
| chr6:42673790-42684871    | 5   | UBR2     |
| chr10:28535561-28596041   | 12  | WAC      |
| chr7:6580554-6585260      | 38  | ZDHHC4   |
| chr1:35405022-35405468    | 11  | ZMYM4    |
| chr19:11105219-11107514   | 12  | LDLR     |
| chr3:100283606-100290701  | 7   | TBC1D23  |
| chr7:33146241-33191563    | 10  | BBS9     |
| chr9:120437294-120439972  | 12  | CDK5RAP2 |
| chr8:60816386-60824016    | 11  | CHD7     |
| chr3:167704841-167720273  | 15  | PDCD10   |
| chr4:102722870-102726683  | 38  | MANBA    |
| chr4:128831732-128852268  | 46  | JADE1    |
| chr3:127710575-127722566  | 19  | MGLL     |

|                           |     |         |
|---------------------------|-----|---------|
| chr2:177461892-177482186  | 6   | AGPS    |
| chr4:15625251-15644708    | 50  | FBXL5   |
| chr18:63344409-63362868   | 7   | KDSR    |
| chr3:170281165-170281968  | 9   | PRKCI   |
| chr10:69359896-69369624   | 8   | HK1     |
| chr7:6430479-6435020      | 8   | DAGLB   |
| chr3:195326884-195392147  | 12  | ACAP2   |
| chr2:177505505-177513908  | 6   | AGPS    |
| chr21:26021839-26053348   | 6   | APP     |
| chr14:96341521-96347341   | 158 | ATG2B   |
| chr15:59671182-59680308   | 31  | BNIP2   |
| chr2:230759958-230798897  | 24  | CAB39   |
| chr11:61323978-61326893   | 8   | DDB1    |
| chr1:244686596-244692020  | 14  | DESI2   |
| chr4:24570653-24576678    | 21  | DHX15   |
| chr19:45368629-45369147   | 37  | ERCC2   |
| chr5:172897001-172914838  | 6   | ERGIC1  |
| chr10:124806830-124826785 | 10  | FAM175B |
| chr1:240329075-240355908  | 61  | FMN2    |
| chr4:88383220-88398209    | 6   | HERC6   |
| chr8:42957093-42982696    | 5   | HOOK3   |
| chr2:127335869-127343194  | 9   | MAP3K2  |
| chr3:183276871-183389779  | 6   | MCF2L2  |
| chr7:131375423-131414710  | 13  | MKLN1   |
| chr5:150541569-150542971  | 80  | NDST1   |
| chr4:47884345-47890703    | 10  | NFXL1   |
| chr17:81560027-81560455   | 7   | nogene  |
| chr20:63993998-63994526   | 14  | nogene  |
| chr1:246186742-246219976  | 6   | nogene  |
| chr5:97427235-97439618    | 8   | nogene  |
| chr16:70214471-70214904   | 6   | nogene  |
| chr10:73030270-73074915   | 9   | P4HA1   |
| chr10:34131462-34269899   | 6   | PARD3   |
| chr18:54280666-54287411   | 16  | POLI    |
| chr2:68186467-68188690    | 20  | PPP3R1  |
| chr11:20395802-20397721   | 12  | PRMT3   |
| chr9:120831330-120833456  | 131 | PSMD5   |
| chr8:140668268-140674404  | 17  | PTK2    |
| chr4:86672364-86701801    | 8   | PTPN13  |
| chr19:33011678-33026632   | 17  | RHPN2   |
| chr22:31602211-31602785   | 56  | SFI1    |
| chr5:72861807-72865729    | 73  | TNPO1   |
| chr2:32633875-32640410    | 74  | TTC27   |

|                           |     |          |
|---------------------------|-----|----------|
| chr17:59731420-59765138   | 12  | VMP1     |
| chrX:118442243-118443687  | 12  | WDR44    |
| chr2:32290482-32301495    | 68  | YIPF4    |
| chr5:62517105-62517497    | 11  | nogene   |
| chr15:30922234-30925939   | 10  | FAN1     |
| chr16:53844154-53888951   | 71  | FTO      |
| chr14:102221153-102223957 | 10  | nogene   |
| chr15:65016435-65027040   | 12  | MTFMT    |
| chr18:21039471-21049880   | 6   | ROCK1    |
| chr6:148440183-148487715  | 7   | SASH1    |
| chr1:3781511-3785203      | 9   | LRRC47   |
| chr9:36651745-36665581    | 10  | MELK     |
| chr5:38996818-39021136    | 69  | RICTOR   |
| chr7:26684735-26739964    | 5   | SKAP2    |
| chr6:35619095-35620274    | 42  | FKBP5    |
| chr17:50964510-50964872   | 15  | nogene   |
| chr6:77151200-77214751    | 9   | nogene   |
| chr9:83999708-84001476    | 7   | RMI1     |
| chr14:73892026-73893932   | 13  | ZNF410   |
| chr3:49699475-49700709    | 16  | RNF123   |
| chr4:435769-438632        | 6   | nogene   |
| chr21:43004325-43024947   | 145 | PKNOX1   |
| chr2:210153494-210155404  | 19  | KANSL1L  |
| chr7:143292299-143292698  | 27  | CASP2    |
| chr15:78878212-78886227   | 34  | MORF4L1  |
| chr22:31187046-31196990   | 5   | RNF185   |
| chr12:101753371-101760143 | 9   | GNPTAB   |
| chr7:131429032-131466415  | 8   | MKLN1    |
| chr2:127520438-127521021  | 14  | nogene   |
| chr21:36247516-36253909   | 6   | DOPEY2   |
| chr15:42321784-42330672   | 15  | GANC     |
| chr14:73355625-73366981   | 10  | NUMB     |
| chr16:67744287-67759732   | 12  | RANBP10  |
| chr22:38245934-38248019   | 119 | TMEM184B |
| chr20:34457389-34471515   | 9   | ITCH     |
| chr11:17959469-18008076   | 90  | SERGEF   |
| chr4:4279446-4281897      | 33  | LYAR     |
| chr1:247433768-247434062  | 7   | nogene   |
| chr1:94201719-94231643    | 76  | ARHGAP29 |
| chr10:7797046-7799194     | 11  | ATP5C1   |
| chrX:77589833-77595785    | 7   | ATRX     |
| chr22:17683213-17702386   | 33  | BCL2L13  |
| chr17:67920014-67924589   | 6   | BPTF     |

|                           |     |          |
|---------------------------|-----|----------|
| chr21:39224407-39238573   | 19  | BRWD1    |
| chr11:47161190-47161438   | 26  | C11orf49 |
| chr6:107039748-107040524  | 18  | C6orf203 |
| chr11:34090178-34090678   | 13  | CAPRIN1  |
| chr17:40161752-40162153   | 10  | CASC3    |
| chr18:69873143-69896045   | 9   | CD226    |
| chr17:80994580-80998420   | 19  | CHMP6    |
| chr12:122288488-122316855 | 74  | CLIP1    |
| chr20:62909698-62914406   | 17  | DIDO1    |
| chr21:46484756-46498833   | 14  | DIP2A    |
| chr3:132473144-132478140  | 24  | DNAJC13  |
| chr12:63617303-63647365   | 39  | DPY19L2  |
| chr17:44852408-44855004   | 6   | EFTUD2   |
| chr1:20941490-20950108    | 10  | EIF4G3   |
| chr8:28155941-28162078    | 188 | ELP3     |
| chr2:26373366-26375148    | 92  | EPT1     |
| chr5:66012048-66028343    | 26  | ERBB2IP  |
| chr5:138517560-138529678  | 74  | ETF1     |
| chr5:176488950-176500146  | 5   | FAF2     |
| chrX:131743095-131756709  | 8   | FIRRE    |
| chr20:28586298-28591519   | 12  | FRG1CP   |
| chr2:31073062-31125253    | 11  | GALNT14  |
| chr19:19474032-19492712   | 17  | GATAD2A  |
| chr9:130099456-130101223  | 13  | GPR107   |
| chr9:5021962-5055788      | 17  | JAK2     |
| chr1:23044426-23050520    | 10  | KDM1A    |
| chr10:32017142-32019959   | 43  | KIF5B    |
| chr7:152220522-152224616  | 56  | KMT2C    |
| chr3:197832196-197835822  | 29  | LRCH3    |
| chr6:53833066-53842227    | 11  | LRRC1    |
| chr2:159729008-159743253  | 10  | 7-Mar    |
| chr14:60808324-60818847   | 20  | MNAT1    |
| chr2:176296859-176328912  | 304 | MTX2     |
| chr12:124347824-124350737 | 15  | NCOR2    |
| chr1:236024069-236048989  | 9   | NID1     |
| chr5:15628257-15634464    | 11  | nogene   |
| chr3:28292735-28298350    | 7   | nogene   |
| chr11:8669671-8670034     | 25  | nogene   |
| chr12:100180552-100196979 | 13  | nogene   |
| chr20:44916755-44924256   | 12  | PABPC1L  |
| chr11:34931403-34992379   | 18  | PDHX     |
| chr7:5982823-6002636      | 7   | PMS2     |
| chr4:105396248-105424322  | 11  | PPA2     |

|                           |     |         |
|---------------------------|-----|---------|
| chr19:45138513-45146480   | 9   | PPP1R37 |
| chr11:68515027-68519651   | 159 | PPP6R3  |
| chr12:112446275-112456898 | 50  | PTPN11  |
| chr8:127867438-127890998  | 11  | PVT1    |
| chr6:3727550-3738148      | 8   | PXDC1   |
| chr2:1673642-1693134      | 10  | PXDN    |
| chr10:98162882-98209899   | 6   | R3HCC1L |
| chr3:128797942-128807671  | 7   | RAB7A   |
| chr17:58694930-58696859   | 7   | RAD51C  |
| chr5:170916464-170968377  | 7   | RANBP17 |
| chr2:86751895-86753558    | 13  | RMND5A  |
| chr12:120562944-120566980 | 7   | RNF10   |
| chr3:196483769-196488683  | 107 | RNF168  |
| chr20:37184179-37184373   | 95  | RPN2    |
| chr5:1065282-1073801      | 14  | SLC12A7 |
| chr2:200416378-200419496  | 10  | SPATS2L |
| chr7:105203627-105203785  | 8   | SRPK2   |
| chr3:136417884-136477412  | 8   | STAG1   |
| chr1:234446802-234472811  | 20  | TARBP1  |
| chr7:5374054-5378024      | 126 | TNRC18  |
| chr1:154253899-154255755  | 11  | UBAP2L  |
| chr4:102809671-102826636  | 24  | UBE2D3  |
| chr2:61370320-61383336    | 6   | USP34   |
| chr10:11518534-11527567   | 27  | USP6NL  |
| chr13:51719197-51727790   | 14  | WDFY2   |
| chr6:43533906-43548460    | 75  | XPO5    |
| chr10:27131858-27136385   | 77  | YME1L1  |
| chr1:52431012-52435465    | 9   | ZCCHC11 |
| chr9:37126311-37247130    | 9   | ZCCHC7  |
| chr20:41213733-41269083   | 6   | ZHX3    |
| chr6:87215902-87222894    | 17  | ZNF292  |
| chr11:125575262-125579068 | 10  | EI24    |
| chr9:131430089-131444328  | 13  | PRRC2B  |
| chr15:50958491-50968377   | 14  | AP4E1   |
| chr1:180397515-180424223  | 6   | ACBD6   |
| chr9:34338712-34343583    | 7   | NUDT2   |
| chr5:32379114-32390437    | 19  | ZFR     |
| chr3:184319688-184324347  | 13  | EIF4G1  |
| chr1:176081151-176135086  | 10  | RFWD2   |
| chr2:222908732-222934687  | 8   | ACSL3   |
| chr16:53254437-53268126   | 19  | CHD9    |
| chr13:25309246-25321093   | 15  | NUPL1   |
| chr4:22461736-22478233    | 12  | ADGRA3  |

|                           |     |            |
|---------------------------|-----|------------|
| chr11:107390073-107418287 | 337 | CWF19L2    |
| chr5:765842-770117        | 17  | nogene     |
| chr5:116298246-116303683  | 6   | nogene     |
| chr12:2917784-2918208     | 10  | nogene     |
| chr17:58703195-58720812   | 11  | RAD51C     |
| chr4:109521116-109521626  | 14  | SEC24B     |
| chr9:128352637-128353541  | 71  | SLC27A4    |
| chr4:20528948-20539584    | 15  | SLIT2      |
| chr1:43858134-43858636    | 26  | ST3GAL3    |
| chr22:41125863-41130003   | 13  | EP300      |
| chr19:33113766-33119117   | 7   | GPATCH1    |
| chr16:72523331-72570515   | 18  | LINC01572  |
| chr13:100301459-100309908 | 174 | PCCA       |
| chr7:45747214-45751646    | 9   | SEPT7P2    |
| chr1:83904078-83907661    | 7   | TLL7       |
| chr20:3290128-3294629     | 13  | C20orf194  |
| chr2:201160431-201164084  | 23  | CFLAR      |
| chr8:127932052-128010444  | 6   | nogene     |
| chr3:170259968-170275287  | 6   | PRKCI      |
| chr17:82884144-82893632   | 34  | TBCD       |
| chr2:171117317-171117857  | 6   | TLK1       |
| chr11:108486156-108491167 | 6   | KDELC2     |
| chr1:50535368-50584811    | 27  | FAF1       |
| chr22:17655661-17702386   | 21  | BCL2L13    |
| chr17:44862712-44865065   | 6   | EFTUD2     |
| chr9:85958471-85962180    | 14  | NAA35      |
| chr11:68564302-68576043   | 12  | PPP6R3     |
| chr2:230045744-230046722  | 8   | SLC16A14   |
| chr9:127804284-127804700  | 10  | FPGS       |
| chr15:29766265-29773357   | 27  | TJP1       |
| chr7:75052710-75070769    | 15  | WBSCR16    |
| chr8:123344883-123348273  | 20  | ATAD2      |
| chrX:118542724-118546116  | 58  | DOCK11     |
| chr7:67243494-67279526    | 535 | nogene     |
| chr17:1675151-1676711     | 26  | PRPF8      |
| chr10:73713203-73721504   | 30  | BMS1P4     |
| chr20:28581918-28591519   | 12  | FRG1CP     |
| chr2:53750782-53765585    | 33  | GPR75-ASB3 |
| chr5:142131807-142135817  | 37  | NDFIP1     |
| chr16:69260049-69284244   | 6   | SNTB2      |
| chr5:180529274-180553471  | 114 | CNOT6      |
| chr17:68114421-68125480   | 42  | LINC00674  |
| chr3:185612606-185617611  | 8   | SENP2      |

|                           |     |           |
|---------------------------|-----|-----------|
| chr9:88418849-88426591    | 25  | SPIN1     |
| chr14:73892026-73898262   | 14  | ZNF410    |
| chr3:189127056-189132697  | 19  | nogene    |
| chr18:79096475-79214038   | 8   | ATP9B     |
| chr5:66012048-66023364    | 18  | ERBB2IP   |
| chr22:47671640-47687206   | 8   | LOC284930 |
| chr3:183070998-183092545  | 16  | MCCC1     |
| chr12:62484169-62501698   | 100 | MON2      |
| chr16:28955977-28964039   | 9   | NFATC2IP  |
| chr2:53948420-53949283    | 14  | PSME4     |
| chr18:8244057-8253414     | 13  | PTPRM     |
| chr15:56394164-56394834   | 34  | TEX9      |
| chr3:100372605-100377912  | 7   | TOMM70A   |
| chr12:10713210-10719143   | 23  | YBX3      |
| chr7:64917029-64918292    | 149 | ZNF273    |
| chr3:126470894-126472305  | 14  | ZXDC      |
| chr1:26794112-26795234    | 7   | PIGV      |
| chr13:28256291-28261458   | 91  | PAN3      |
| chr4:153580825-153589007  | 10  | KIAA0922  |
| chr4:10097710-10103986    | 480 | WDR1      |
| chr11:64859923-64860336   | 25  | EHD1      |
| chr15:67231229-67231897   | 8   | AAGAB     |
| chr3:195320700-195345317  | 42  | ACAP2     |
| chr5:5187724-5209246      | 6   | ADAMTS16  |
| chr17:19651546-19671956   | 24  | ALDH3A2   |
| chr17:68250187-68251178   | 7   | AMZ2      |
| chr12:110387738-110388623 | 13  | ANAPC7    |
| chr6:89566833-89606105    | 7   | ANKRD6    |
| chr4:41142986-41177690    | 82  | APBB2     |
| chr16:24964196-24970580   | 8   | ARHGAP17  |
| chr2:9297299-9323250      | 9   | ASAP2     |
| chr10:86890061-86900126   | 8   | BMPR1A    |
| chr12:111681636-111683307 | 13  | BRAP      |
| chr21:39213480-39225197   | 10  | BRWD1     |
| chr21:39247700-39250889   | 9   | BRWD1     |
| chr19:32879067-32882013   | 6   | CEP89     |
| chr2:200856681-200856985  | 37  | CLK1      |
| chr16:58580632-58583182   | 29  | CNOT1     |
| chr5:75379336-75381201    | 8   | COL4A3BP  |
| chr10:68936935-68943257   | 92  | DDX50     |
| chr3:172773902-172784803  | 14  | ECT2      |
| chr10:119107947-119120452 | 20  | FAM45A    |
| chr8:129862228-129879471  | 7   | FAM49B    |



|                           |     |         |
|---------------------------|-----|---------|
| chr1:59339957-59378837    | 118 | FGGY    |
| chr4:48619273-48634490    | 19  | FRYL    |
| chr3:81670837-81753280    | 11  | GBE1    |
| chr16:74459681-74467848   | 6   | GLG1    |
| chr7:80188950-80203832    | 21  | GNAI1   |
| chr3:37286013-37296219    | 10  | GOLGA4  |
| chr6:134993757-135002842  | 8   | HBS1L   |
| chr12:112243352-112244009 | 12  | HECTD4  |
| chr15:28229673-28233341   | 9   | HERC2   |
| chr8:42964310-42974194    | 14  | HOOK3   |
| chr5:138425410-138428086  | 9   | KDM3B   |
| chr17:50741101-50741731   | 61  | LUC7L3  |
| chr7:2002064-2069338      | 14  | MAD1L1  |
| chr2:127329920-127343194  | 10  | MAP3K2  |
| chr3:179378340-179386629  | 27  | MFN1    |
| chr1:167765582-167788019  | 38  | MPZL1   |
| chr20:34762726-34768586   | 33  | NCOA6   |
| chrX:119930015-119932216  | 38  | NKAP    |
| chrX:1383600-1384388      | 11  | nogene  |
| chr12:122493917-122494273 | 7   | nogene  |
| chr5:65668047-65668676    | 17  | nogene  |
| chr2:111344060-111469987  | 10  | nogene  |
| chr5:177135940-177204292  | 9   | NSD1    |
| chr11:59639047-59639383   | 20  | PATL1   |
| chr11:86000642-86003451   | 16  | PICALM  |
| chr11:68596096-68603492   | 79  | PPP6R3  |
| chr2:135565736-135605016  | 8   | R3HDM1  |
| chr5:131430858-131433658  | 11  | RAPGEF6 |
| chr3:29868857-29897475    | 15  | RBMS3   |
| chr6:166934090-166952548  | 6   | RNASET2 |
| chr8:42870003-42887871    | 12  | RNF170  |
| chr19:49496471-49497168   | 7   | RPS11   |
| chr15:84687624-84691644   | 185 | SEC11A  |
| chr4:42020415-42023384    | 19  | SLC30A9 |
| chr7:140334428-140337349  | 20  | SLC37A3 |
| chr1:204116506-204117707  | 12  | SOX13   |
| chr3:136568764-136630981  | 11  | STAG1   |
| chr3:4362038-4376389      | 10  | SUMF1   |
| chr1:159918841-159920537  | 25  | TAGLN2  |
| chr12:110626361-110634779 | 9   | TCTN1   |
| chr13:113503495-113520733 | 28  | TMCO3   |
| chr15:43134256-43160794   | 7   | TMEM62  |
| chr14:102830333-102903429 | 37  | TRAF3   |

|                          |     |          |
|--------------------------|-----|----------|
| chr22:28629551-28633620  | 14  | TTC28    |
| chr11:8089609-8090231    | 7   | TUB      |
| chr6:158429735-158452268 | 42  | TULP4    |
| chr17:18797578-18804266  | 29  | TVP23B   |
| chr22:21610856-21611043  | 14  | UBE2L3   |
| chr16:23562624-23567069  | 6   | UBFD1    |
| chr9:83677726-83678599   | 614 | UBQLN1   |
| chr15:43036177-43038232  | 6   | UBR1     |
| chr4:39531968-39534629   | 7   | UGDH-AS1 |
| chr19:18845979-18852296  | 6   | UPF1     |
| chr1:150077668-150110627 | 7   | VPS45    |
| chr16:74908907-74909917  | 8   | WDR59    |
| chr5:37437921-37479987   | 6   | WDR70    |
| chr4:1974862-1976679     | 17  | WHSC1    |
| chrX:68513326-68521497   | 28  | YIPF6    |
| chr1:52515890-52526373   | 10  | ZCCHC11  |
| chr12:42317339-42324104  | 28  | ZCRB1    |
| chr1:35413971-35415714   | 99  | ZMYM4    |
| chr2:95148884-95153259   | 34  | ZNF514   |
| chr19:51878388-51886912  | 6   | ZNF577   |
| chr1:227650955-227654476 | 7   | ZNF678   |
| chr16:19071927-19074035  | 11  | COQ7     |
| chr16:70567410-70570149  | 6   | SF3B3    |
| chr6:84212956-84215922   | 13  | CEP162   |
| chr17:75485427-75486426  | 9   | KIAA0195 |
| chr3:160423424-160423840 | 7   | SMC4     |
| chr16:68273817-68287871  | 6   | SLC7A6   |
| chr1:185214506-185231708 | 81  | SWT1     |
| chr3:15735409-15766312   | 12  | ANKRD28  |
| chr3:11347876-11426926   | 11  | ATG7     |
| chr10:35025131-35033273  | 10  | CUL2     |
| chr14:69075344-69091887  | 6   | DCAF5    |
| chr8:119846989-119853215 | 8   | DSCC1    |
| chr15:66435026-66436892  | 231 | MAP2K1   |
| chr1:30945345-30950261   | 6   | PUM1     |
| chr3:27411641-27452498   | 91  | SLC4A7   |
| chr12:76826907-76842981  | 6   | ZDHHC17  |
| chr21:39293810-39298582  | 10  | BRWD1    |
| chr11:9178131-9181084    | 10  | DENND5A  |
| chr21:37238459-37240639  | 47  | DSCR3    |
| chr7:13931501-13939246   | 7   | ETV1     |
| chr9:129899964-129900547 | 8   | FNBP1    |
| chr16:58718195-58719255  | 119 | GOT2     |

|                           |     |                       |
|---------------------------|-----|-----------------------|
| chr10:97616230-97619683   | 7   | MORN4                 |
| chr1:53787157-53797144    | 7   | NDC1                  |
| chr12:12832701-12839204   | 12  | nogene                |
| chr2:60786946-60792289    | 15  | PAPOLG                |
| chr8:140864311-140925749  | 271 | PTK2                  |
| chr19:40786664-40786978   | 37  | RAB4B-EGLN2           |
| chr3:17508473-17672705    | 11  | TBC1D5                |
| chr1:235437321-235442911  | 17  | TBCE                  |
| chr6:158580939-158608750  | 8   | TMEM181               |
| chr2:71365428-71365706    | 8   | ZNF638                |
| chr20:47249286-47347926   | 9   | ZMYND8                |
| chr10:327005-345110       | 10  | DIP2C                 |
| chr3:119923372-120093593  | 9   | GSK3B                 |
| chr5:168500590-168510686  | 30  | RARS                  |
| chr20:35709223-35739017   | 6   | RBM39                 |
| chr5:108020924-108224228  | 37  | FBXL17                |
| chr18:79126266-79277196   | 61  | ATP9B                 |
| chr1:92088697-92147786    | 6   | BTBD8                 |
| chr10:49524032-49528525   | 6   | ERCC6-PGBD3           |
| chr1:212863724-212889257  | 16  | FLVCR1                |
| chr3:172133470-172251541  | 8   | FNDC3B                |
| chr9:97369921-97371706    | 17  | LOC100499484-C9ORF174 |
| chr18:58681169-58700591   | 12  | MALT1                 |
| chrX:152468181-152487023  | 36  | nogene                |
| chr3:138681966-138691143  | 9   | PIK3CB                |
| chr9:112250928-112276013  | 25  | PTBP3                 |
| chr2:65001447-65010763    | 6   | SLC1A4                |
| chr15:58912562-58921584   | 6   | SLTM                  |
| chr10:94441895-94507347   | 8   | TBC1D12               |
| chr21:37108391-37148647   | 14  | TTC3                  |
| chr4:84860411-84860622    | 19  | WDFY3                 |
| chr1:15529087-15536814    | 15  | DNAJC16               |
| chr2:40160764-40164984    | 11  | SLC8A1                |
| chr11:122776218-122789308 | 10  | UBASH3B               |
| chr12:76821057-76822531   | 57  | ZDHHC17               |
| chr17:2613657-2638320     | 6   | PAFAH1B1              |
| chr20:33366858-33370629   | 40  | CDK5RAP1              |
| chr1:93210801-93217869    | 7   | CCDC18                |
| chr11:103280347-103399872 | 8   | DYNC2H1               |
| chr4:20256671-20268881    | 7   | SLIT2                 |
| chr19:34430575-34445121   | 24  | UBA2                  |
| chr11:108256214-108267342 | 10  | ATM                   |
| chr6:335113-348841        | 8   | DUSP22                |

|                           |     |         |
|---------------------------|-----|---------|
| chr12:50427764-50429090   | 12  | LARP4   |
| chr9:35231119-35243364    | 41  | UNC13B  |
| chr2:58198578-58232112    | 86  | FANCL   |
| chr6:149572284-149572603  | 8   | GINM1   |
| chr7:131411305-131445903  | 12  | MKLN1   |
| chr10:50519830-50590247   | 14  | SGMS1   |
| chr2:43498832-43527988    | 123 | THADA   |
| chr5:14374228-14381252    | 13  | TRIO    |
| chr20:35016007-35021356   | 6   | TRPC4AP |
| chr11:122806409-122809907 | 11  | UBASH3B |
| chr4:102576875-102584820  | 6   | NFKB1   |
| chr1:94458606-94483239    | 54  | ABCD3   |
| chr2:15603191-15607313    | 42  | DDX1    |
| chr5:171876284-171900100  | 11  | FBXW11  |
| chr8:81679125-81680783    | 7   | IMPA1   |
| chr6:116689319-116702150  | 8   | KPNA5   |
| chr22:21788256-21807846   | 7   | MAPK1   |
| chr6:130801816-130803194  | 175 | nogene  |
| chr1:171579353-171587751  | 12  | PRRC2C  |
| chr22:41257947-41261580   | 7   | RANGAP1 |
| chr8:100268784-100288267  | 16  | RNF19A  |
| chr10:50306843-50311415   | 7   | SGMS1   |
| chr22:30646597-30649253   | 13  | SLC35E4 |
| chr7:832504-833229        | 7   | SUN1    |
| chr8:119788337-119797846  | 197 | TAF2    |
| chr7:130184183-130192823  | 23  | TMEM209 |
| chr2:63484603-63487494    | 7   | WDPCP   |
| chr4:342291-344430        | 6   | ZNF141  |
| chr19:36823284-36825692   | 14  | ZNF790  |
| chr11:118754704-118757287 | 31  | DDX6    |
| chr4:73090666-73092300    | 91  | ANKRD17 |
| chr4:150415437-150491035  | 14  | LRBA    |
| chr14:102280647-102283592 | 20  | MOK     |
| chr7:66796617-66805396    | 21  | RABGEF1 |
| chr3:10046579-10064875    | 35  | FANCD2  |
| chr12:49752463-49759321   | 6   | TMBIM6  |
| chr11:102186017-102223752 | 7   | YAP1    |
| chr1:154966318-154967797  | 17  | SHC1    |
| chr13:98482264-98519473   | 14  | STK24   |
| chr20:32309712-32316874   | 12  | KIF3B   |
| chr11:93788000-93801972   | 8   | MED17   |
| chr5:135360496-135389126  | 8   | H2AFY   |
| chr5:180248972-180269409  | 6   | MAPK9   |

|                          |     |             |
|--------------------------|-----|-------------|
| chr17:60623520-60648082  | 91  | PPM1D       |
| chr1:231616643-231618059 | 11  | TSNAX-DISC1 |
| chr8:94738368-94739790   | 10  | DPY19L4     |
| chr1:94464774-94475737   | 7   | ABCD3       |
| chr22:25594298-25604453  | 38  | ADRBK2      |
| chr20:63700601-63706738  | 5   | ARFRP1      |
| chr17:68306942-68307711  | 50  | ARSG        |
| chr10:72152868-72196989  | 7   | ASCC1       |
| chr2:38313150-38319019   | 7   | ATL2        |
| chr11:74028286-74034278  | 11  | C2CD3       |
| chr1:93212100-93216746   | 52  | CCDC18      |
| chr10:32711619-32729457  | 9   | CCDC7       |
| chr1:227069776-227074364 | 10  | CDC42BPA    |
| chr16:3739577-3745354    | 7   | CREBBP      |
| chr17:82251378-82265796  | 9   | CSNK1D      |
| chr2:171448680-171453213 | 6   | DCAF17      |
| chr19:18924232-18924979  | 19  | DDX49       |
| chr10:12106245-12108015  | 17  | DHTKD1      |
| chr1:27993399-28004419   | 6   | EYA3        |
| chr6:170317369-170330550 | 53  | FAM120B     |
| chr8:93709770-93718788   | 6   | FAM92A1     |
| chr2:169538012-169544835 | 20  | FASTKD1     |
| chr5:151786571-151797428 | 9   | G3BP1       |
| chr16:4817597-4832912    | 6   | GLYR1       |
| chr1:155754374-155760641 | 5   | GON4L       |
| chr11:18339563-18341607  | 8   | GTF2H1      |
| chr2:177215538-177216188 | 9   | HNRNPA3     |
| chr18:35478281-35480563  | 35  | INO80C      |
| chr15:90426109-90433795  | 13  | IQGAP1      |
| chr6:18197056-18197661   | 10  | KDM1B       |
| chr10:32047411-32048551  | 31  | KIF5B       |
| chr19:11113534-11113762  | 6   | LDLR        |
| chr4:41603874-41619440   | 30  | LIMCH1      |
| chr5:1488390-1501603     | 90  | LPCAT1      |
| chr19:325634-336173      | 135 | MIER2       |
| chr4:70950699-70975286   | 13  | MOB1B       |
| chr10:30340225-30341640  | 25  | MTPAP       |
| chr16:47128324-47132025  | 35  | NETO2       |
| chr12:6983001-6997342    | 12  | nogene      |
| chr19:4949820-4950260    | 8   | nogene      |
| chr17:75120172-75120539  | 11  | nogene      |
| chr21:22062008-22066645  | 5   | nogene      |
| chr11:73909398-73914504  | 11  | PAAF1       |

|                           |     |           |
|---------------------------|-----|-----------|
| chr1:233227225-233252788  | 30  | PCNXL2    |
| chr11:17145667-17150655   | 19  | PIK3C2A   |
| chr8:140818276-140921132  | 13  | PTK2      |
| chr1:51919926-51937412    | 10  | RAB3B     |
| chr3:8890388-8913720      | 8   | RAD18     |
| chr3:128620256-128622409  | 7   | RPN1      |
| chr14:54702061-54737287   | 20  | SAMD4A    |
| chr3:47434924-47443091    | 6   | SCAP      |
| chr8:73582769-73673242    | 8   | STAU2     |
| chr11:1286001-1290409     | 16  | TOLLIP    |
| chr15:63044026-63062645   | 6   | TPM1      |
| chr2:61229547-61241819    | 5   | USP34     |
| chr6:148953871-148964563  | 9   | UST       |
| chr3:184886109-184900972  | 8   | VPS8      |
| chr1:155674684-155679512  | 6   | YY1AP1    |
| chr10:45663541-45663842   | 7   | ZFAND4    |
| chr1:35358924-35370627    | 9   | ZMYM4     |
| chr4:102580534-102582957  | 11  | NFKB1     |
| chr8:38247712-38253718    | 8   | DDHD2     |
| chr3:197076585-197119530  | 13  | DLG1      |
| chr5:71041521-71060170    | 21  | GTF2H2C_2 |
| chr12:122129629-122129915 | 21  | MLXIP     |
| chr19:13090298-13095729   | 13  | NFIX      |
| chr8:100220278-100231288  | 64  | SPAG1     |
| chr3:136398748-136423044  | 49  | STAG1     |
| chr1:161778243-161784096  | 89  | ATF6      |
| chr7:6046070-6050045      | 147 | EIF2AK1   |
| chr2:143951981-143970762  | 12  | GTDC1     |
| chr13:27567639-27581803   | 40  | LNX2      |
| chr2:149575710-149582271  | 6   | MMADHC    |
| chr1:37864311-37868614    | 8   | INPP5B    |
| chr1:147254869-147259918  | 12  | CHD1L     |
| chr16:22432725-22435812   | 7   | RRN3P3    |
| chr6:100766564-100848707  | 9   | ASCC3     |
| chr8:117804721-117812961  | 7   | EXT1      |
| chr19:32973183-32976678   | 7   | FAAP24    |
| chr10:93359832-93373085   | 8   | MYOF      |
| chr9:128498412-128499126  | 8   | ODF2      |
| chr2:199323802-199433514  | 7   | SATB2     |
| chr3:33408689-33425741    | 8   | UBP1      |
| chr7:44569983-44570877    | 9   | DDX56     |
| chr5:16877608-16917042    | 9   | MYO10     |
| chr1:40413015-40417096    | 8   | SMAP2     |

|                           |     |              |
|---------------------------|-----|--------------|
| chr2:9517900-9536828      | 6   | ADAM17       |
| chrX:131768548-131784039  | 21  | FIRRE        |
| chr4:3103823-3107423      | 38  | HTT          |
| chr20:34457389-34481206   | 10  | ITCH         |
| chr1:229486370-229487613  | 32  | NUP133       |
| chr10:89588651-89612048   | 12  | PANK1        |
| chr4:86693586-86701801    | 32  | PTPN13       |
| chr15:43842414-43844054   | 19  | WDR76        |
| chr2:29131257-29145367    | 6   | CLIP4        |
| chr5:141582311-141583615  | 128 | DIAPH1       |
| chr10:5709529-5714207     | 138 | nogene       |
| chr8:140735250-140739107  | 10  | PTK2         |
| chr9:6477621-6486925      | 8   | UHRF2        |
| chr8:102836255-102843747  | 10  | AZIN1        |
| chr5:69191794-69197109    | 37  | CENPH        |
| chr3:138570317-138572932  | 371 | CEP70        |
| chr11:68794803-68799355   | 9   | CPT1A        |
| chr16:1625972-1641187     | 330 | CRAMP1L      |
| chr10:14919737-14935564   | 15  | DCLRE1C      |
| chrX:54455447-54456567    | 10  | FGD1         |
| chr6:135039572-135042126  | 325 | HBS1L        |
| chr3:197704541-197705175  | 23  | KIAA0226     |
| chr1:113112478-113119523  | 24  | LRIG2        |
| chr2:171325840-171330698  | 21  | METTL8       |
| chr17:36508896-36511455   | 11  | MYO19        |
| chr20:63874340-63874890   | 7   | nogene       |
| chrX:46521966-46523125    | 9   | nogene       |
| chr4:105424195-105434161  | 10  | PPA2         |
| chr21:36712532-36731151   | 8   | SIM2         |
| chr9:33971650-33973237    | 143 | UBAP2        |
| chr5:109774787-109823837  | 8   | MAN2A1       |
| chr7:66560578-66573550    | 24  | GS1-124K5.11 |
| chr18:46855344-46864248   | 15  | PIAS2        |
| chr7:141621731-141641908  | 7   | AGK          |
| chr18:9204475-9211784     | 10  | ANKRD12      |
| chr12:110018344-110030758 | 8   | ANKRD13A     |
| chr2:95899307-95914180    | 7   | ANKRD36C     |
| chr5:78216054-78228239    | 9   | AP3B1        |
| chr2:70169556-70181997    | 9   | C2orf42      |
| chr7:25151595-25158530    | 27  | C7orf31      |
| chr21:36386059-36387730   | 6   | CHAF1B       |
| chr11:9178131-9207632     | 6   | DENND5A      |
| chr11:112043465-112051349 | 10  | DLAT         |

|                           |     |          |
|---------------------------|-----|----------|
| chr2:25607235-25628384    | 67  | DTNB     |
| chr14:69228815-69230598   | 18  | EXD2     |
| chr4:55893551-55899884    | 9   | EXOC1    |
| chr19:33088133-33101574   | 28  | GPATCH1  |
| chr1:23337753-23338608    | 7   | HNRNPR   |
| chr15:40987090-40987974   | 18  | INO80    |
| chr5:137634036-137639977  | 12  | KLHL3    |
| chr19:2438162-2438531     | 39  | LMNB2    |
| chr17:45289235-45290765   | 9   | MAP3K14  |
| chr2:39258347-39267247    | 15  | MAP4K3   |
| chr2:31891991-31920910    | 146 | MEMO1    |
| chr9:21837907-21859425    | 13  | MTAP     |
| chr1:21470631-21473585    | 10  | NBPF3    |
| chr15:64499292-64504346   | 6   | nogene   |
| chr12:7201750-7202704     | 9   | PEX5     |
| chr6:43587271-43605319    | 17  | POLH     |
| chr19:33002424-33002812   | 10  | RHPN2    |
| chr11:77675035-77678153   | 48  | RSF1     |
| chr15:34256228-34258944   | 7   | SLC12A6  |
| chr18:2666156-2688747     | 9   | SMCHD1   |
| chr1:109347482-109355469  | 12  | SORT1    |
| chr15:29772063-29800702   | 23  | TJP1     |
| chr2:73730559-73732285    | 7   | TPRKB    |
| chr16:2050399-2055519     | 11  | TSC2     |
| chr12:109488571-109507735 | 19  | UBE3B    |
| chr2:128143093-128145967  | 8   | UGGT1    |
| chr3:184849070-184886156  | 6   | VPS8     |
| chr6:142189425-142204065  | 6   | VTA1     |
| chr18:76849525-76868863   | 100 | ZNF236   |
| chr5:177041777-177044533  | 8   | ZNF346   |
| chr19:52655560-52660843   | 255 | ZNF83    |
| chr8:140562452-140585311  | 16  | AGO2     |
| chr6:161146523-161154310  | 36  | AGPAT4   |
| chr7:129368469-129379749  | 11  | AHCYL2   |
| chr18:9208656-9239556     | 6   | ANKRD12  |
| chr1:161791407-161802272  | 11  | ATF6     |
| chr21:29351633-29352663   | 10  | BACH1    |
| chr7:82335134-82349649    | 7   | CACNA2D1 |
| chr10:118707491-118730410 | 17  | CACUL1   |
| chr12:28304625-28391411   | 11  | CCDC91   |
| chr4:185175785-185176051  | 113 | CFAP97   |
| chr7:6424751-6436533      | 19  | DAGLB    |
| chr14:95124195-95141748   | 20  | DICER1   |



|                           |     |               |
|---------------------------|-----|---------------|
| chr9:137743391-137762820  | 10  | EHMT1         |
| chr8:116724908-116726172  | 294 | EIF3H         |
| chr22:31441773-31449531   | 7   | EIF4ENIF1     |
| chr1:20904882-20942330    | 13  | EIF4G3        |
| chr17:7594237-7594757     | 59  | FXR2          |
| chr5:151786602-151804446  | 8   | G3BP1         |
| chr10:102375358-102377128 | 21  | GBF1          |
| chr20:34935575-34937023   | 10  | GSS           |
| chr20:34413741-34449480   | 7   | ITCH          |
| chr1:35466607-35479212    | 23  | KIAA0319L     |
| chr3:44829970-44840456    | 31  | KIF15         |
| chr9:34269256-34271930    | 53  | KIF24         |
| chr7:23123776-23140944    | 9   | KLHL7         |
| chr19:48157013-48162351   | 14  | LIG1          |
| chr5:140167364-140167802  | 19  | LOC101929719  |
| chr15:66435026-66444707   | 9   | MAP2K1        |
| chr3:183318067-183389779  | 10  | MCF2L2        |
| chr14:46855023-46882221   | 6   | MDGA2         |
| chr1:169235130-169287408  | 7   | NME7          |
| chr17:7475257-7475561     | 12  | nogene        |
| chr6:141900322-142006118  | 15  | nogene        |
| chr6:17668974-17669546    | 9   | NUP153        |
| chr2:174123179-174182524  | 12  | OLA1          |
| chr4:39866860-39869462    | 7   | PDS5A         |
| chr1:109281107-109282575  | 7   | PSRC1         |
| chr1:96769702-96777946    | 9   | PTBP2         |
| chr5:170918712-170968377  | 7   | RANBP17       |
| chr22:41264663-41274727   | 6   | RANGAP1       |
| chr20:18510821-18515736   | 20  | SEC23B        |
| chr16:29457631-29458015   | 19  | SLX1A-SULT1A3 |
| chr4:185264437-185288082  | 6   | SNX25         |
| chr2:230436380-230450255  | 10  | SP100         |
| chr2:45488239-45553730    | 12  | SRBD1         |
| chr6:35869009-35872728    | 12  | SRPK1         |
| chr11:3967551-4023987     | 7   | STIM1         |
| chr20:13559007-13600617   | 10  | TASP1         |
| chr9:100509004-100516771  | 13  | TMEFF1        |
| chr11:87067693-87157406   | 13  | TMEM135       |
| chrX:155506897-155545277  | 17  | TMLHE         |
| chr1:193075819-193077050  | 13  | TROVE2        |
| chr21:37108391-37135514   | 29  | TTC3          |
| chr6:42603587-42605859    | 17  | UBR2          |
| chr8:99156548-99193057    | 17  | VPS13B        |

|                           |     |          |
|---------------------------|-----|----------|
| chr4:183207952-183209025  | 94  | WWC2     |
| chr12:10713210-10715783   | 11  | YBX3     |
| chr9:112111653-112157613  | 6   | SUSD1    |
| chr4:48684672-48687160    | 46  | FRYL     |
| chr10:7220410-7285954     | 109 | SFMBT2   |
| chr11:83273646-83280260   | 11  | CCDC90B  |
| chr9:128262562-128263092  | 10  | GOLGA2   |
| chrX:7077219-7085471      | 12  | HDHD1    |
| chr12:95494055-95496098   | 9   | METAP2   |
| chrX:1726066-1726490      | 10  | nogene   |
| chr2:45413113-45477075    | 18  | SRBD1    |
| chr17:17879626-17907531   | 25  | TOM1L2   |
| chr1:97549559-97573970    | 36  | DPYD     |
| chr13:111205288-111233293 | 32  | ARHGEF7  |
| chr18:79154503-79214038   | 6   | ATP9B    |
| chr7:33146241-33177591    | 365 | BBS9     |
| chr10:68736875-68742569   | 10  | CCAR1    |
| chr2:26373366-26383347    | 10  | EPT1     |
| chr1:230249183-230255344  | 6   | GALNT2   |
| chr2:26230191-26239143    | 9   | HADHA    |
| chr7:18829160-18835997    | 8   | HDAC9    |
| chr9:94429188-94441099    | 6   | HIATL1   |
| chr19:18931324-18939049   | 11  | HOMER3   |
| chr3:151409242-151416422  | 12  | MED12L   |
| chr1:70163379-70164137    | 6   | nogene   |
| chr14:73179582-73180018   | 10  | nogene   |
| chr9:125153532-125158382  | 6   | PPP6C    |
| chr20:20635417-20653587   | 6   | RALGAPA2 |
| chr2:72988257-73058596    | 13  | SFXN5    |
| chr8:91289135-91318380    | 6   | SLC26A7  |
| chr13:60439687-60485948   | 10  | TDRD3    |
| chr16:70258979-70268379   | 16  | AARS     |
| chr11:108131906-108134316 | 131 | ACAT1    |
| chr11:78101092-78109581   | 28  | ALG8     |
| chr3:43549719-43574864    | 8   | ANO10    |
| chr2:9344531-9356345      | 18  | ASAP2    |
| chr12:32327460-32328555   | 63  | BICD1    |
| chr16:8858349-8859335     | 91  | CARHSP1  |
| chr7:107281299-107283732  | 78  | COG5     |
| chr13:39694633-39727548   | 8   | COG6     |
| chr20:495718-508660       | 18  | CSNK2A1  |
| chr5:138824529-138904441  | 7   | CTNNA1   |
| chr7:6425987-6430607      | 18  | DAGLB    |

|                           |      |          |
|---------------------------|------|----------|
| chr4:51860542-51886638    | 7    | DCUN1D4  |
| chr6:83090217-83097115    | 8    | DOPEY1   |
| chr6:20479845-20486803    | 6    | E2F3     |
| chr2:152558739-152581049  | 6    | FMNL2    |
| chr10:13663452-13675044   | 37   | FRMD4A   |
| chr10:104259575-104263077 | 15   | GSTO1    |
| chr6:135037810-135042126  | 15   | HBS1L    |
| chr17:50064076-50068305   | 12   | ITGA3    |
| chr17:47676408-47677127   | 21   | KPNB1    |
| chr2:210455106-210476412  | 9    | LANCL1   |
| chr2:101823927-101829594  | 8    | MAP4K4   |
| chr22:20551435-20555148   | 13   | MED15    |
| chr8:117528650-117530827  | 395  | MED30    |
| chr6:167870382-167889326  | 25   | MLLT4    |
| chr10:46010222-46011206   | 20   | NCOA4    |
| chr8:97694810-97695233    | 6    | nogene   |
| chr8:42324479-42325463    | 8    | nogene   |
| chr22:32232605-32232962   | 20   | nogene   |
| chr12:49469795-49470126   | 12   | nogene   |
| chr4:80335743-80420400    | 7    | nogene   |
| chr17:82207730-82208048   | 7    | nogene   |
| chr3:189383743-189385040  | 6    | nogene   |
| chr5:177238236-177239865  | 35   | NSD1     |
| chr11:47797778-47803536   | 6    | NUP160   |
| chr17:2665371-2667198     | 23   | PAFAH1B1 |
| chr5:79656957-79669028    | 15   | PAPD4    |
| chr13:24498115-24501834   | 26   | PARP4    |
| chr20:9217389-9339037     | 24   | PLCB4    |
| chr3:127639244-127662311  | 7    | PODXL2   |
| chr11:20388018-20408032   | 7    | PRMT3    |
| chr10:122983271-122990407 | 9    | PSTK     |
| chr8:140846259-140890769  | 2477 | PTK2     |
| chr8:127855162-127890998  | 25   | PVT1     |
| chr1:10007569-10008274    | 74   | RBP7     |
| chr18:23462963-23464628   | 6    | RIOK3    |
| chr6:89372436-89380367    | 14   | RRAGD    |
| chr15:41466140-41470392   | 10   | RTF1     |
| chr2:109585125-109593119  | 498  | 10-Sep   |
| chrX:119640691-119653040  | 85   | 6-Sep    |
| chr1:150929966-150941428  | 51   | SETDB1   |
| chr10:67887416-67891554   | 23   | SIRT1    |
| chr7:134299522-134309479  | 6    | SLC35B4  |
| chr19:11003028-11003397   | 21   | SMARCA4  |

|                           |     |          |
|---------------------------|-----|----------|
| chr7:17801587-17826091    | 10  | SNX13    |
| chrX:71368053-71387461    | 8   | TAF1     |
| chr17:62536169-62565137   | 70  | TLK2     |
| chr22:40277076-40285770   | 19  | TNRC6B   |
| chr3:189207375-189310539  | 10  | TPRG1    |
| chr1:184070615-184073006  | 6   | TSEN15   |
| chr20:44479984-44484530   | 6   | TTPAL    |
| chrX:16828093-16829770    | 11  | TXLNG    |
| chr2:202896064-202897415  | 24  | WDR12    |
| chr16:69783031-69787080   | 8   | WWP2     |
| chr1:31346639-31348974    | 60  | ZCCHC17  |
| chr10:31373017-31461237   | 259 | ZEB1     |
| chr6:38078039-38082457    | 93  | ZFAND3   |
| chr2:113913171-113917008  | 26  | ACTR3    |
| chr2:9509978-9521316      | 13  | ADAM17   |
| chr10:74600378-74602161   | 7   | ADK      |
| chr10:4830674-4909606     | 13  | AKR1E2   |
| chr8:130401884-130406193  | 11  | ASAP1    |
| chr2:175080659-175097593  | 15  | ATF2     |
| chr6:32120770-32126252    | 33  | ATF6B    |
| chr11:108329020-108332037 | 30  | ATM      |
| chr6:57182031-57183911    | 114 | BAG2     |
| chr7:73459535-73463099    | 11  | BAZ1B    |
| chr17:30266884-30274197   | 11  | BLMH     |
| chr16:53141178-53157541   | 37  | CHD9     |
| chr12:70342106-70346324   | 7   | CNOT2    |
| chr17:63792411-63800617   | 12  | DDX42    |
| chr11:112037272-112039397 | 25  | DLAT     |
| chr5:95906522-95919545    | 33  | ELL2     |
| chr8:108449822-108455930  | 451 | EMC2     |
| chr3:9969718-9977446      | 6   | EMC3     |
| chr12:131992172-132006302 | 10  | EP400    |
| chr6:35619095-35642843    | 503 | FKBP5    |
| chr6:2382853-2399037      | 6   | GMDS-AS1 |
| chr1:109579203-109586882  | 21  | GNAI3    |
| chr3:160300882-160319939  | 17  | IFT80    |
| chr15:69429110-69436722   | 11  | KIF23    |
| chr6:108319616-108402054  | 8   | LACE1    |
| chr6:149676259-149676737  | 7   | LATS1    |
| chrX:77870807-77875597    | 14  | MAGT1    |
| chr5:109729341-109774965  | 15  | MAN2A1   |
| chr19:18134578-18135841   | 14  | MAST3    |
| chr22:37911951-37919178   | 40  | MICALL1  |

|                           |     |          |
|---------------------------|-----|----------|
| chr17:62664547-62664949   | 40  | MRC2     |
| chr5:32268700-32276742    | 105 | MTMR12   |
| chr2:95832599-95834977    | 37  | nogene   |
| chr1:58506059-58534331    | 21  | OMA1     |
| chr5:6737509-6742597      | 8   | PAPD7    |
| chr20:18142207-18145351   | 8   | PET117   |
| chr9:41031370-41053899    | 10  | PGM5P2   |
| chr5:149836262-149842377  | 16  | PPARGC1B |
| chr1:30980061-30995220    | 16  | PUM1     |
| chr4:98404476-98421394    | 9   | RAP1GDS1 |
| chr5:131548046-131624334  | 7   | RAPGEF6  |
| chr6:70576819-70579566    | 10  | SDHAF4   |
| chr19:17497254-17497464   | 11  | SLC27A1  |
| chr12:64062916-64065219   | 8   | SRGAP1   |
| chr3:196053417-196060247  | 14  | TFRC     |
| chr5:14270824-14304592    | 32  | TRIO     |
| chr3:12505153-12519197    | 10  | TSEN2    |
| chr2:46950362-46957007    | 11  | TTC7A    |
| chr6:158429735-158431663  | 58  | TULP4    |
| chr3:44945167-44959460    | 52  | ZDHHC3   |
| chr3:44629073-44632599    | 10  | ZNF197   |
| chr22:23292540-23295155   | 9   | BCR      |
| chr1:225252300-225259253  | 13  | DNAH14   |
| chr9:100006505-100022226  | 7   | ERP44    |
| chr19:58243964-58246794   | 8   | ZNF544   |
| chr4:124709999-124711274  | 6   | ANKRD50  |
| chr16:4441374-4448848     | 6   | DNAJA3   |
| chr1:54205017-54210131    | 7   | MRPL37   |
| chr6:36158647-36158941    | 24  | nogene   |
| chrX:121048129-121048330  | 13  | nogene   |
| chr2:28935520-28942381    | 9   | WDR43    |
| chr22:41656902-41658352   | 6   | XRCC6    |
| chr16:29904851-29906127   | 106 | ASPHD1   |
| chr3:15217424-15220981    | 9   | CAPN7    |
| chr12:102039867-102046119 | 41  | CCDC53   |
| chr10:87059149-87068157   | 8   | GLUD1    |
| chr10:67988042-68014186   | 7   | HERC4    |
| chr16:4651962-4657363     | 9   | MGRN1    |
| chr4:139342825-139349581  | 13  | NAA15    |
| chr2:105855047-105855289  | 6   | NCK2     |
| chr5:170909660-170924550  | 45  | RANBP17  |
| chr12:99772921-99812311   | 19  | ANKS1B   |
| chr4:147909731-147966839  | 10  | ARHGAP10 |

|                           |     |          |
|---------------------------|-----|----------|
| chr8:61517527-61567318    | 8   | ASPH     |
| chr8:61637946-61653660    | 9   | ASPH     |
| chr17:61847100-61861569   | 13  | BRIP1    |
| chr9:120467859-120491477  | 36  | CDK5RAP2 |
| chr16:58574608-58599511   | 16  | CNOT1    |
| chr15:69436137-69436722   | 82  | KIF23    |
| chr12:50435487-50441643   | 46  | LARP4    |
| chr8:91200612-91219005    | 35  | LRRC69   |
| chr17:61972726-61983114   | 11  | MED13    |
| chr15:25085189-25087599   | 30  | nogene   |
| chr2:200938301-200938801  | 9   | nogene   |
| chr14:31562067-31599379   | 9   | NUBPL    |
| chr11:68548066-68564432   | 6   | PPP6R3   |
| chr13:114040999-114056662 | 8   | RASA3    |
| chr17:76487711-76488132   | 6   | RHBDF2   |
| chr3:42555929-42569073    | 7   | SEC22C   |
| chr1:168231513-168243093  | 13  | SFT2D2   |
| chr8:103400414-103407784  | 59  | SLC25A32 |
| chr1:151658234-151683445  | 64  | SNX27    |
| chr1:109316849-109317969  | 20  | SORT1    |
| chr21:37087246-37108446   | 31  | TTC3     |
| chr4:75790149-75790797    | 35  | USO1     |
| chr2:61300950-61301454    | 24  | USP34    |
| chr4:84796520-84801864    | 8   | WDFY3    |
| chr6:13652658-13658832    | 18  | RANBP9   |
| chr6:88890494-88904955    | 8   | RNGTT    |
| chr1:19682159-19683444    | 6   | TMCO4    |
| chr1:229530198-229531731  | 19  | ABCB10   |
| chr7:1879377-1879840      | 6   | nogene   |
| chr16:2581606-2586893     | 6   | PDPK1    |
| chr15:68141945-68146700   | 113 | PIAS1    |
| chr2:112647652-112652798  | 6   | SLC20A1  |
| chr3:196072002-196075360  | 8   | TFRC     |
| chr22:46463706-46464345   | 15  | CELSR1   |
| chr19:34431860-34464131   | 52  | UBA2     |
| chr15:82627192-82641682   | 20  | CPEB1    |
| chr16:10977224-10982991   | 8   | CLEC16A  |
| chr5:82058494-82178587    | 6   | ATG10    |
| chr17:61034665-61084564   | 6   | BCAS3    |
| chr10:86838864-86892229   | 29  | BMPR1A   |
| chr7:122615180-122629328  | 28  | CADPS2   |
| chr12:96298868-96300360   | 56  | CDK17    |
| chr15:65450998-65452102   | 55  | DPP8     |

|                              |     |           |
|------------------------------|-----|-----------|
| chr10:119069445-119073937    | 9   | EIF3A     |
| chr3:10036286-10039845       | 12  | FANCD2    |
| chr7:5491230-5505630         | 12  | FBXL18    |
| chr10:67966682-67992682      | 19  | HERC4     |
| chr10:32019857-32021287      | 95  | KIF5B     |
| chr14:67269700-67279537      | 21  | MPP5      |
| chr10:12389870-12403369      | 10  | nogene    |
| chr17:81610209-81613494      | 8   | NPLOC4    |
| chr3:186791724-186792947     | 47  | RFC4      |
| chr14:49586579-49586878      | 7   | RN7SL1    |
| chr14:51243855-51249765      | 168 | TMX1      |
| chr7:98961260-98962427       | 34  | TRRAP     |
| chr5:77449759-77464809       | 166 | WDR41     |
| chr14:74809379-74810420      | 11  | YLPM1     |
| chr1:235484321-235496308     | 8   | B3GALNT2  |
| chr2:32473111-32477583       | 16  | BIRC6     |
| chr8:43002106-43013400       | 7   | HOOK3     |
| chrUn_GL000195v1:46556-49119 | 6   | LOC389831 |
| chr2:177231884-177234271     | 27  | NFE2L2    |
| chr4:47875126-47914205       | 6   | NFXL1     |
| chr6:44121861-44122192       | 23  | nogene    |
| chr4:84780107-84783074       | 8   | WDFY3     |
| chr12:894561-897681          | 35  | WNK1      |
| chr16:28132333-28156527      | 18  | XPO6      |
| chr16:89892192-89900794      | 14  | TCF25     |
| chrX:2392353-2425304         | 41  | DHRX      |
| chrX:120447840-120449128     | 9   | LAMP2     |
| chr1:100913662-100921841     | 49  | SLC30A7   |
| chr3:172782162-172786574     | 56  | ECT2      |
| chr11:66210361-66211259      | 9   | PACS1     |
| chr14:47035010-47097123      | 13  | MDGA2     |
| chr8:65745406-65782843       | 12  | PDE7A     |
| chr10:127018709-127026424    | 24  | DOCK1     |
| chr11:103280347-103287605    | 71  | DYNC2H1   |
| chr1:240206798-240258032     | 114 | FMN2      |
| chr16:47258631-47313823      | 8   | ITFG1     |
| chr2:151438683-151443709     | 6   | RIF1      |
| chr2:101294013-101295181     | 19  | RNF149    |
| chr15:50634381-50639548      | 15  | TRPM7     |
| chr12:998323-1028572         | 172 | ERC1      |
| chr1:246437147-246441299     | 10  | nogene    |
| chr6:161022009-161049979     | 8   | MAP3K4    |
| chr7:102913085-102931933     | 33  | FBXL13    |

|                           |     |          |
|---------------------------|-----|----------|
| chr14:21499763-21500682   | 8   | METTL3   |
| chr3:138698906-138712304  | 26  | PIK3CB   |
| chr4:112562370-112584174  | 9   | ZGRF1    |
| chr6:44104376-44116629    | 10  | MRPL14   |
| chr17:29507895-29510992   | 21  | TAOK1    |
| chr4:88038250-88056267    | 9   | PKD2     |
| chr3:56592969-56598300    | 6   | CCDC66   |
| chr8:67103036-67116156    | 14  | CSPP1    |
| chr19:47352753-47353735   | 9   | DHX34    |
| chr2:11455341-11457233    | 17  | E2F6     |
| chr2:54813231-54829477    | 26  | EML6     |
| chr3:33068229-33072713    | 18  | GLB1     |
| chr5:180261683-180287067  | 58  | MAPK9    |
| chr9:125559632-125585727  | 15  | MAPKAP1  |
| chr10:27158548-27165539   | 29  | MASTL    |
| chrX:121163288-121185843  | 6   | nogene   |
| chr10:68060510-68061295   | 14  | nogene   |
| chr20:58271362-58286446   | 12  | PPP4R1L  |
| chr12:118386113-118391282 | 17  | SUDS3    |
| chr1:1256991-1267992      | 67  | UBE2J2   |
| chr1:244422834-244424387  | 18  | ADSS     |
| chr10:31861394-31910563   | 45  | ARHGAP12 |
| chr1:93582300-93584121    | 56  | BCAR3    |
| chr2:96797011-96799648    | 7   | CNNM4    |
| chr1:155709772-155726019  | 11  | DAP3     |
| chr10:127362063-127384909 | 6   | DOCK1    |
| chr9:137728348-137744090  | 47  | EHMT1    |
| chr8:28737518-28743214    | 9   | EXTL3    |
| chr5:138011007-138019146  | 7   | FAM13B   |
| chr4:75648638-75655870    | 106 | G3BP2    |
| chr8:42906172-42950455    | 27  | HOOK3    |
| chr20:34480598-34481206   | 14  | ITCH     |
| chr3:183643479-183665039  | 8   | KLHL24   |
| chr3:197015364-197017290  | 11  | MFI2     |
| chr20:34714589-34715365   | 7   | NCOA6    |
| chr4:34996297-35005121    | 10  | nogene   |
| chr8:127842514-127843102  | 23  | nogene   |
| chr14:20318454-20318844   | 32  | nogene   |
| chr17:75208526-75213119   | 8   | NUP85    |
| chr2:174123179-174157864  | 15  | OLA1     |
| chr15:64817945-64819223   | 59  | PIF1     |
| chr4:83094677-83107950    | 9   | PLAC8    |
| chr2:86121478-86125515    | 24  | PTCD3    |



|                           |     |              |
|---------------------------|-----|--------------|
| chr19:16552805-16553909   | 6   | SLC35E1      |
| chr4:123056386-123090705  | 18  | SPATA5       |
| chr21:44052279-44063785   | 28  | TRAPPC10     |
| chr5:14290715-14316743    | 87  | TRIO         |
| chr12:122235785-122239945 | 11  | VPS33A       |
| chr16:28111816-28125848   | 31  | XPO6         |
| chr7:122129360-122133741  | 6   | AASS         |
| chr11:34197324-34204690   | 15  | ABTB2        |
| chr7:92327782-92371607    | 6   | ANKIB1       |
| chr10:27092405-27093799   | 17  | ANKRD26      |
| chr12:27380246-27390239   | 53  | ARNTL2       |
| chr2:175130137-175151158  | 6   | ATF2         |
| chr20:51656937-51690819   | 55  | ATP9A        |
| chr17:61743012-61780401   | 21  | BRIP1        |
| chr12:28204092-28259442   | 9   | CCDC91       |
| chr6:99561366-99562948    | 8   | CCNC         |
| chr1:156317165-156317547  | 14  | CCT3         |
| chr1:207757013-207761446  | 9   | CD46         |
| chr1:193135390-193138173  | 28  | CDC73        |
| chr16:29860580-29861259   | 11  | CDIPT        |
| chr7:90747680-90790652    | 112 | CDK14        |
| chr4:184716396-184717196  | 6   | CENPU        |
| chr5:98873592-98876833    | 6   | CHD1         |
| chr3:129265548-129267099  | 51  | COPG1        |
| chr10:35178888-35207051   | 25  | CREM         |
| chr8:67095292-67105975    | 10  | CSPP1        |
| chr5:141581914-141583615  | 54  | DIAPH1       |
| chr6:56843054-56900621    | 6   | DST          |
| chr4:55877916-55890386    | 8   | EXOC1        |
| chr3:33358966-33385728    | 11  | FBXL2        |
| chr2:47838858-47839769    | 46  | FBXO11       |
| chr5:108954728-108959347  | 19  | FER          |
| chr4:53414614-53444103    | 106 | FIP1L1       |
| chr19:18537600-18538436   | 324 | FKBP8        |
| chr12:2864319-2866521     | 21  | FOXM1        |
| chr13:32078833-32117473   | 21  | FRY          |
| chr3:180947864-180949343  | 132 | FXR1         |
| chr17:36554819-36557336   | 11  | GGNBP2       |
| chr9:83780381-83788678    | 8   | GKAP1        |
| chr7:66554584-66576929    | 33  | GS1-124K5.11 |
| chr15:63652413-63658718   | 7   | HERC1        |
| chr10:68025545-68073686   | 24  | HERC4        |
| chr1:212006638-212021212  | 20  | INTS7        |

|                           |     |           |
|---------------------------|-----|-----------|
| chr11:9408485-9420698     | 15  | IPO7      |
| chr9:539676-540667        | 8   | KANK1     |
| chr13:30208576-30241086   | 64  | KATNAL1   |
| chr4:165294358-165299656  | 26  | KLHL2     |
| chr12:25225613-25227412   | 6   | KRAS      |
| chr10:836402-885760       | 30  | LARP4B    |
| chr6:79513211-79519085    | 16  | LCA5      |
| chr4:118619978-118628226  | 11  | LOC729218 |
| chr4:150817123-150831976  | 10  | LRBA      |
| chr7:1980452-2014642      | 9   | MAD1L1    |
| chr15:67692478-67703408   | 32  | MAP2K5    |
| chr2:159729008-159752571  | 11  | 7-Mar     |
| chr10:27158548-27161182   | 33  | MASTL     |
| chr2:8943186-8982144      | 13  | MBOAT2    |
| chr2:99186176-99195756    | 62  | MRPL30    |
| chr6:24405167-24409573    | 6   | MRS2      |
| chr1:155612420-155747896  | 9   | MSTO2P    |
| chrX:150592604-150619139  | 80  | MTM1      |
| chr9:137215202-137215377  | 25  | NDOR1     |
| chr16:3654960-3658064     | 10  | nogene    |
| chr7:66491939-66492217    | 37  | nogene    |
| chr11:642723-642883       | 8   | nogene    |
| chr2:189854502-189855000  | 7   | nogene    |
| chr17:7245214-7245608     | 6   | nogene    |
| chr5:73447480-73448201    | 9   | nogene    |
| chr4:148120157-148152613  | 7   | NR3C2     |
| chr12:102099105-102118583 | 15  | NUP37     |
| chr1:113738109-113738799  | 68  | PHTF1     |
| chr18:46827958-46829867   | 7   | PIAS2     |
| chr1:151224247-151232703  | 61  | PIP5K1A   |
| chr14:23301884-23302159   | 26  | PPP1R3E   |
| chr17:66687110-66689047   | 27  | PRKCA     |
| chr4:118313200-118316323  | 9   | PRSS12    |
| chr2:73088049-73089315    | 72  | RAB11FIP5 |
| chr8:60558851-60591969    | 12  | RAB2A     |
| chr19:11405146-11417059   | 6   | RGL3      |
| chr6:125045210-125046661  | 6   | RNF217    |
| chr2:218580560-218592707  | 9   | RQCD1     |
| chr2:218582970-218584721  | 9   | RQCD1     |
| chr11:4101992-4109703     | 6   | RRM1      |
| chr1:41105741-41117010    | 7   | SCMH1     |
| chr4:75967276-75974133    | 12  | SDAD1     |
| chr6:107921796-107929514  | 128 | SEC63     |

|                           |      |         |
|---------------------------|------|---------|
| chr3:47710682-47729094    | 9    | SMARCC1 |
| chr6:85557975-85565419    | 19   | SNX14   |
| chr1:43920403-43921638    | 11   | ST3GAL3 |
| chr19:1218416-1219413     | 12   | STK11   |
| chr1:172555868-172579267  | 13   | SUCO    |
| chr12:111933885-111938210 | 6    | TMEM116 |
| chr15:43415593-43416416   | 27   | TP53BP1 |
| chrX:101035612-101042312  | 73   | TRMT2B  |
| chr13:37745936-37746455   | 9    | TRPC4   |
| chrX:16818573-16820255    | 106  | TXLNG   |
| chr7:139269393-139279360  | 6    | UBN2    |
| chr1:77713199-77714783    | 7    | USP33   |
| chr6:99439768-99465136    | 39   | USP45   |
| chr17:59731420-59738947   | 731  | VMP1    |
| chr8:99156548-99170163    | 6    | VPS13B  |
| chr2:63949036-63965966    | 18   | VPS54   |
| chr2:58084088-58089723    | 441  | VRK2    |
| chr13:41865735-41868477   | 284  | VWA8    |
| chr2:28917892-28929710    | 40   | WDR43   |
| chr12:32745679-32747363   | 23   | YARS2   |
| chr18:62556202-62565096   | 37   | ZCCHC2  |
| chr8:141160631-141163429  | 91   | DENND3  |
| chr5:108294851-108348530  | 9    | FBXL17  |
| chr12:100591735-100618587 | 42   | GAS2L3  |
| chr12:112216291-112219489 | 8    | HECTD4  |
| chr16:4505483-4507012     | 14   | HMOX2   |
| chr7:2568953-2573488      | 14   | IQCE    |
| chr12:124340005-124342074 | 7    | NCOR2   |
| chr11:127940964-127941306 | 14   | nogene  |
| chr14:23322180-23325291   | 7    | PABPN1  |
| chr11:77353535-77374365   | 21   | PAK1    |
| chr14:70946914-70978648   | 9    | PCNX    |
| chr2:48474682-48486758    | 7    | PPP1R21 |
| chr3:49032182-49033228    | 13   | QRICH1  |
| chr1:245853463-245863886  | 6    | SMYD3   |
| chr6:43478086-43503508    | 9    | TJAP1   |
| chr7:157382245-157385611  | 1981 | DNAJB6  |
| chr11:78119181-78124214   | 8    | ALG8    |
| chrX:110264488-110270854  | 8    | AMMECR1 |
| chr3:48922747-48927813    | 142  | ARIH2   |
| chr16:18794598-18798834   | 9    | ARL6IP1 |
| chr2:215312497-215336124  | 14   | ATIC    |
| chr10:115120184-115215880 | 12   | ATRNLI  |

|                           |     |             |
|---------------------------|-----|-------------|
| chr12:111552279-111552977 | 151 | ATXN2       |
| chr14:34758703-34762223   | 18  | BAZ1A       |
| chr17:43063332-43067695   | 9   | BRCA1       |
| chr21:39218151-39218660   | 14  | BRWD1       |
| chr17:82171700-82193830   | 10  | CCDC57      |
| chr9:4676461-4676749      | 12  | CDC37L1-AS1 |
| chr11:95812931-95818904   | 87  | CEP57       |
| chr2:201129728-201149835  | 21  | CFLAR       |
| chr12:122340752-122341697 | 6   | CLIP1       |
| chr2:207567462-207577655  | 54  | CREB1       |
| chr10:35137781-35148491   | 11  | CREM        |
| chr10:125088190-125111093 | 64  | CTBP2       |
| chr11:108088526-108089623 | 10  | CUL5        |
| chr10:100260217-100262063 | 20  | CWF19L1     |
| chr15:22879912-22883011   | 7   | CYFIP1      |
| chr14:22571878-22575233   | 11  | DAD1        |
| chr12:32710928-32713371   | 11  | DNM1L       |
| chr10:126970701-127008804 | 23  | DOCK1       |
| chr1:212100251-212102952  | 64  | DTL         |
| chr11:103253284-103259977 | 7   | DYNC2H1     |
| chr21:37420298-37496258   | 10  | DYRK1A      |
| chr17:44881686-44894525   | 6   | EFTUD2      |
| chr9:137752330-137758011  | 52  | EHMT1       |
| chr22:41125863-41146816   | 6   | EP300       |
| chr5:138518691-138529678  | 9   | ETF1        |
| chr14:45008912-45025872   | 7   | FAM179B     |
| chr10:15816834-15843272   | 50  | FAM188A     |
| chr5:177537872-177539042  | 6   | FAM193B     |
| chr16:30942115-30942536   | 17  | FBXL19      |
| chr1:240177920-240234450  | 10  | FMN2        |
| chr17:82563353-82587272   | 40  | FOXK2       |
| chr14:30598482-30602131   | 101 | G2E3        |
| chr19:19492305-19494383   | 10  | GATAD2A     |
| chr10:87051582-87068157   | 7   | GLUD1       |
| chr4:88390651-88393582    | 11  | HERC6       |
| chr13:30463206-30463694   | 7   | HMGB1       |
| chr12:54283078-54283967   | 23  | HNRNPA1     |
| chrX:134473358-134498436  | 70  | HPRT1       |
| chr5:119525215-119536550  | 14  | HSD17B4     |
| chr1:154448124-154454581  | 6   | IL6R        |
| chr15:41079700-41092182   | 7   | INO80       |
| chr15:90491332-90492711   | 9   | IQGAP1      |
| chr3:124841382-124848558  | 15  | ITGB5       |

|                           |     |              |
|---------------------------|-----|--------------|
| chr12:26681873-26716242   | 12  | ITPR2        |
| chr5:138420705-138425582  | 9   | KDM3B        |
| chr17:34983001-34983552   | 12  | LIG3         |
| chr15:30647667-30667275   | 10  | LOC100288637 |
| chr4:128292933-128483487  | 16  | LOC100507487 |
| chr4:150277852-150286034  | 9   | LRBA         |
| chr4:150735257-150831976  | 7   | LRBA         |
| chr7:2229983-2230724      | 40  | MAD1L1       |
| chr2:216277671-216283729  | 45  | 4-Mar        |
| chr14:103462404-103468186 | 10  | MARK3        |
| chr6:83216497-83227477    | 6   | ME1          |
| chr17:40053297-40053635   | 10  | MED24        |
| chr12:95485878-95496098   | 12  | METAP2       |
| chr14:45217018-45218454   | 12  | MIS18BP1     |
| chr7:24623662-24680520    | 8   | MPP6         |
| chr9:21815432-21838010    | 7   | MTAP         |
| chr14:64431531-64440266   | 8   | MTHFD1       |
| chr13:41252644-41254620   | 9   | MTRF1        |
| chr8:17713213-17723833    | 17  | MTUS1        |
| chr9:126370164-126395697  | 13  | MVB12B       |
| chr22:36348903-36349255   | 10  | MYH9         |
| chr12:6521797-6522037     | 38  | NCAPD2       |
| chr12:124372021-124378384 | 10  | NCOR2        |
| chr18:58315981-58333892   | 24  | NEDD4L       |
| chr9:104750955-104759171  | 7   | NIPSNAP3A    |
| chr10:31373017-31391224   | 6   | nogene       |
| chr14:102281246-102281689 | 7   | nogene       |
| chr7:39949850-39950810    | 8   | nogene       |
| chr4:143808313-143866076  | 6   | nogene       |
| chr6:33307223-33307496    | 6   | nogene       |
| chr13:99071509-99072508   | 10  | nogene       |
| chr17:82100853-82104138   | 8   | nogene       |
| chr1:247199359-247200193  | 6   | nogene       |
| chr7:5613765-5616208      | 14  | nogene       |
| chr2:10644319-10684612    | 8   | NOL10        |
| chr6:17665238-17669028    | 28  | NUP153       |
| chr11:47783072-47786554   | 20  | NUP160       |
| chr11:47783072-47788611   | 6   | NUP160       |
| chr3:13351878-13354107    | 18  | NUP210       |
| chr7:24830767-24852634    | 6   | OSBPL3       |
| chr5:141409267-141410620  | 29  | PCDHGB6      |
| chr4:730629-737521        | 10  | PCGF3        |
| chr21:46349011-46349820   | 384 | PCNT         |

|                           |     |          |
|---------------------------|-----|----------|
| chr2:61031418-61032113    | 31  | PEX13    |
| chr11:85996825-86014963   | 14  | PICALM   |
| chr14:103757649-103797518 | 23  | PPP1R13B |
| chr11:68519500-68564432   | 7   | PPP6R3   |
| chr5:145817893-145823134  | 21  | PRELID2  |
| chr5:40764513-40775503    | 6   | PRKAA1   |
| chr15:78544868-78546698   | 48  | PSMA4    |
| chr1:96769702-96770851    | 38  | PTBP2    |
| chr9:94064733-94088263    | 11  | PTPDC1   |
| chr3:128806371-128807671  | 239 | RAB7A    |
| chr5:171158333-171242820  | 10  | RANBP17  |
| chr3:78932470-78938927    | 6   | ROBO1    |
| chr2:218580560-218583086  | 13  | RQCD1    |
| chr3:159812757-159866281  | 9   | SCHIP1   |
| chr3:72812670-72824551    | 10  | SHQ1     |
| chr15:75411491-75413045   | 45  | SIN3A    |
| chr2:17731077-17745951    | 42  | SMC6     |
| chr16:69245601-69260260   | 17  | SNTB2    |
| chr2:54612160-54618193    | 6   | SPTBN1   |
| chr4:56476670-56478649    | 7   | SRP72    |
| chr10:17704430-17705741   | 118 | STAM     |
| chr20:45000391-45001353   | 17  | STK4     |
| chr15:101703858-101714963 | 7   | TARSL2   |
| chr13:113610995-113623286 | 9   | TFDP1    |
| chr15:29759890-29773357   | 10  | TJP1     |
| chr3:129857249-129880559  | 28  | TMCC1    |
| chr16:24776932-24777358   | 6   | TNRC6A   |
| chr5:40728344-40730343    | 87  | TTC33    |
| chr9:121974008-121989770  | 25  | TTLL11   |
| chr1:83904078-83921394    | 6   | TTLL7    |
| chr1:83890320-83906463    | 9   | TTLL7    |
| chr21:43094470-43100519   | 13  | U2AF1    |
| chr7:139237004-139261741  | 14  | UBN2     |
| chr17:60265411-60271481   | 80  | USP32    |
| chr2:61203139-61211929    | 7   | USP34    |
| chr3:49292509-49294598    | 12  | USP4     |
| chrX:155220182-155228482  | 7   | VBP1     |
| chrX:118392631-118398470  | 6   | WDR44    |
| chr8:86398341-86402203    | 8   | WWP1     |
| chr6:43560177-43567354    | 39  | XPO5     |
| chr2:216113015-216132387  | 8   | XRCC5    |
| chr3:183772304-183777700  | 7   | YEATS2   |
| chr6:87215902-87233527    | 140 | ZNF292   |

|                           |     |          |
|---------------------------|-----|----------|
| chr1:77633114-77641655    | 100 | ZZZ3     |
| chr15:41757787-41760529   | 11  | MGA      |
| chr8:99102952-99121445    | 12  | VPS13B   |
| chr5:73058432-73077493    | 108 | FCHO2    |
| chr15:72020917-72046634   | 13  | MYO9A    |
| chr4:67795747-67802411    | 6   | nogene   |
| chr12:79786373-79788783   | 6   | PPP1R12A |
| chr4:120777187-120821345  | 13  | PRDM5    |
| chr4:76995780-77020670    | 16  | 11-Sep   |
| chr13:45411361-45411938   | 14  | SLC25A30 |
| chr8:38337304-38348215    | 6   | WHSC1L1  |
| chr1:162566011-162581459  | 12  | UAP1     |
| chr17:63764015-63764847   | 47  | CCDC47   |
| chr19:3496540-3496886     | 8   | DOHH     |
| chr10:67988662-68044563   | 7   | HERC4    |
| chr5:70042366-70044143    | 20  | nogene   |
| chr1:206415888-206430222  | 8   | SRGAP2   |
| chr13:102622876-102627924 | 73  | TPP2     |
| chr5:173108623-173110711  | 7   | CREBRF   |
| chr20:3912457-3918796     | 27  | PANK2    |
| chr7:5725323-5741644      | 10  | RNF216   |
| chr9:132288235-132311856  | 9   | SETX     |
| chrX:118441367-118444494  | 12  | WDR44    |
| chr12:6522827-6523346     | 13  | NCAPD2   |
| chr2:174915057-174940894  | 10  | CHN1     |
| chr6:52438303-52440603    | 8   | EFHC1    |
| chr17:18340042-18353817   | 19  | SHMT1    |
| chr1:16630889-16635168    | 12  | CROCCP2  |
| chr16:28711656-28715434   | 7   | EIF3C    |
| chr21:14968324-15043574   | 7   | NRIP1    |
| chr17:18867281-18877870   | 41  | PRPSAP2  |
| chr1:176149005-176176007  | 43  | RFWD2    |
| chr1:86719506-86724405    | 18  | SH3GLB1  |
| chr21:32650183-32653366   | 15  | SYNJ1    |
| chr14:73147794-73149550   | 8   | PSEN1    |
| chr12:19462509-19466850   | 86  | AEBP2    |
| chr2:202518821-202519052  | 27  | BMPR2    |
| chr4:2904763-2908604      | 10  | ADD1     |
| chr17:60656598-60657042   | 9   | PPM1D    |
| chr5:27276140-27281091    | 13  | nogene   |
| chr9:113256113-113257185  | 15  | SLC31A1  |
| chr19:33462994-33501001   | 11  | PEPD     |
| chr6:57193841-57196606    | 72  | RAB23    |

|                           |     |          |
|---------------------------|-----|----------|
| chr17:80640442-80643810   | 9   | RPTOR    |
| chr1:243378720-243418076  | 6   | SDCCAG8  |
| chr1:168183901-168184878  | 11  | TIPRL    |
| chr15:50458999-50465191   | 7   | USP8     |
| chr2:159275545-159283093  | 14  | WDSUB1   |
| chr3:195295707-195302174  | 54  | ACAP2    |
| chr2:73550266-73559142    | 6   | ALMS1    |
| chr21:39224407-39232498   | 12  | BRWD1    |
| chr15:82552479-82557986   | 8   | CPEB1    |
| chr2:241407536-241431774  | 11  | FARP2    |
| chr9:92256679-92285839    | 47  | IARS     |
| chr15:99255897-99287951   | 8   | LRRC28   |
| chr8:97690951-97723035    | 9   | MTDH     |
| chr15:25393745-25415842   | 18  | nogene   |
| chr14:70946914-70969110   | 28  | PCNX     |
| chr8:47887546-47893387    | 6   | PRKDC    |
| chr15:34250297-34251057   | 12  | SLC12A6  |
| chr1:156199834-156200472  | 49  | SLC25A44 |
| chr19:43744771-43748052   | 9   | SMG9     |
| chr3:30671637-30674246    | 26  | TGFBR2   |
| chr1:162499954-162501104  | 11  | UHMK1    |
| chr8:65693643-65704929    | 6   | MTFR1    |
| chr6:98899267-98905670    | 12  | FBXL4    |
| chr1:155343313-155346469  | 6   | ASH1L    |
| chr15:79356752-79383106   | 6   | nogene   |
| chr13:30637743-30647057   | 8   | USPL1    |
| chrX:100914620-100923061  | 6   | XKRX     |
| chr10:101672914-101673673 | 21  | FBXW4    |
| chr9:34338712-34339166    | 11  | NUDT2    |
| chr18:46827958-46846841   | 15  | PIAS2    |
| chr5:179705678-179706331  | 45  | CANX     |
| chr1:61762857-61775334    | 15  | INADL    |
| chr16:71676446-71681905   | 9   | PHLPP2   |
| chr5:39002534-39021136    | 238 | RICTOR   |
| chr14:102830333-102876525 | 32  | TRAF3    |
| chr4:109491326-109516640  | 13  | SEC24B   |
| chr14:105454192-105460953 | 8   | MTA1     |
| chr11:67217730-67219403   | 14  | KDM2A    |
| chr10:124681606-124696212 | 48  | FAM53B   |
| chr1:173839366-173840973  | 8   | DARS2    |
| chr10:13333816-13336350   | 16  | SEPHS1   |
| chr1:193135390-193152444  | 6   | CDC73    |
| chr5:131180094-131187109  | 24  | LYRM7    |



chr18:70047970-70075541

6

RTTN
